# Supplementary material for: Bacterial death and TRADD-N domains help define novel apoptosis and immunity mechanisms shared by prokaryotes and metazoans
Source: PubMed Central journal article supplement (PMC8195603; doi:10.7554/elife.70394), 2021-06-01
Supplement: elife-70394-fig2-data1.pdf [file elife-70394-fig2-data1.pdf]

**Bacterial Death and TRADD-N domains help define novel apoptosis and immunity mechanisms shared by prokaryotes and metazoans**

**Figure 2-Source data 1**

Gurmeet Kaur†, Lakshminarayan M. Iyer†, A. Maxwell Burroughs, L. Aravind\*

Computational Biology Branch, National Center for Biotechnology Information, National Library of Medicine, National Institutes of Health, Bethesda, MD 20894, USA

†These authors contributed equally to the manuscript

## Index.

1. Source data. Gene neighborhoods and domain architectures of the bacterial Death-like domain 3 (bDLD3)
2. Source data. Gene neighborhoods and domain architectures of the iSTAND2 systems
3. Source data. Gene neighborhoods and domain architectures of the TERN3 systems
4. Source data. Gene neighborhoods and domain architectures of the bacterial NPCBM domain described in this study
5. Source data. Gene neighborhoods and domain architectures of the FGS domains described in this study
6. Source data. Gene neighborhoods and domain architectures of the bacterial and prophage/phage SPRY domain.
7. Source data. Gene neighborhoods and domain architectures of TPR-GREAB-C-PIN systems.
8. Source data. Gene neighborhoods and domain architectures of the novel STAND1 (nSTAND1) domain.

1. Source data. Gene neighborhoods and domain architectures of the bacterial Death-like domain 3 (bDLD3)

| acc        | operon                                                                                                                                    | architecture       | len | gen.name       | taxend                          | species                         | define                                                                            | gca             |
|------------|-------------------------------------------------------------------------------------------------------------------------------------------|--------------------|-----|----------------|---------------------------------|---------------------------------|-----------------------------------------------------------------------------------|-----------------|
| ADE14635.1 | <-NTP_transferase<-?  ?→?→  <-?  HKD→ TIR+bDLD3→ <i>bDLD3+nSTAND1+FGS</i> →                                                               | TIR+bDLD3          | 799 | Nhal_1492      | Gamma                           | Nitrosococcus halophilus Nc 4   | protein of unknown function DUF323 [Nitrosococcus halophilus Nc 4].               | GCA_000024725.1 |
| ADE14636.1 | *bDLD3→                                                                                                                                   |                    | 246 | Nhal_1493      | Gamma                           | Nitrosococcus halophilus Nc 4   | TIR protein [Nitrosococcus halophilus Nc 4].                                      | GCA_000024725.1 |
| AMV23994.1 | <-HEPN<-?  ?→?→ bDLD3→?→ <i>McrA-NTD+HNH2</i> →?→  <-?  ?→?→?→ <i>PNPase+TRADDN+CASPASE+bDLD3</i> →<br>APATPase+TPR+TPR→                  | bDLD3              | 816 | VT84_06335     | Planctomycetes                  | Gemmata sp. SH-PL17             | 5'-methylthioadenosine/S-adenosylhomocysteine nucleosidase [Gemmata sp. SH-PL17]. | GCA_001610855.1 |
| AMV24002.1 | *bDLD3→                                                                                                                                   |                    | 518 | VT84_06375     | Planctomycetes                  | Gemmata sp. SH-PL17             | hypothetical protein VT84_06375 [Gemmata sp. SH-PL17].                            | GCA_001610855.1 |
| APA97850.1 | <-SIG+NPCBM<-TM+TM+TM+TM  PNPase+bDLD3→ <i>bDLD3+NPCBM</i> → TM+NPCBM→  <-LD-peptidase<-?<-HD  ?→<br>GNTR-HTH→                            | PNPase+bDLD3       | 349 | mtnN           | Actinobacteria                  | Nocardia seriolae               | Adenosylhomocysteine nucleosidase [Nocardia seriolae].                            | GCA_001865855.1 |
| APA97851.1 | *bDLD3→                                                                                                                                   |                    | 217 | NS506_03802    | Actinobacteria                  | Nocardia seriolae               | hypothetical protein NS506_03802 [Nocardia seriolae].                             | GCA_001865855.1 |
| BAW07945.1 | <-SIG+NPCBM  ?→ PNPase+bDLD3*→ bDLD3+NPCBM→ TM+NPCBM→  <-LD-peptidase<-?<-HD  ?→ GNTR-HTH→                                                | PNPase+bDLD3       | 245 | NSERUTF1_4813  | Actinobacteria                  | Nocardia seriolae               | conserved hypothetical protein [Nocardia seriolae].                               | GCA_002356035.1 |
| BAY07541.1 | Uma2→  <-?<-?  EAD9+CASPASE+bDLD3*→ APATPase+BetaPropeller→?→?→  <-?<-?  Pkinase→                                                         | EAD9+CASPASE+bDLD3 | 391 | NIES2098_06580 | Cyanobacteria                   | Calothrix sp. NIES-2098         | hypothetical protein NIES2098_06580 [Calothrix sp. NIES-2098].                    | GCA_002368175.1 |
| ETW99001.1 | bDLD3+nSTAND1+FGS*→                                                                                                                       | bDLD3+nSTAND1+FGS  | 783 | ETSY1_16630    | Nitrospinae/Tectomicrobia group | Candidatus Entotheonella factor | hypothetical protein ETSY1_16630 [Candidatus Entotheonella factor].               | GCA_000522425.1 |
| ETW99008.1 | bDLD3+NACHT*→                                                                                                                             | bDLD3+NACHT        | 326 | ETSY1_16605    | Nitrospinae/Tectomicrobia group | Candidatus Entotheonella factor | hypothetical protein ETSY1_16605 [Candidatus Entotheonella factor].               | GCA_000522425.1 |
| ETX07101.1 | TIR→ bDLD3*→  <-FGS                                                                                                                       | bDLD3              | 125 | ETSY2_13175    | Nitrospinae/Tectomicrobia group | Candidatus Entotheonella gemina | hypothetical protein ETSY2_13175 [Candidatus Entotheonella gemina].               | GCA_000522445.1 |
| ETX07918.1 | bDLD3+NACHT+FGS*→                                                                                                                         | bDLD3+NACHT+FGS    | 922 | ETSY2_08400    | Nitrospinae/Tectomicrobia group | Candidatus Entotheonella gemina | hypothetical protein ETSY2_08400 [Candidatus Entotheonella gemina].               | GCA_000522445.1 |
| GAX40011.1 | SIG+CASPASE→?→  <-?  ?→  <-?  ?→ CASPASE+bDLD3*→ APATPase+BetaPropeller→  <-?<-?  Calcineurin→<br>Calcineurin→  <-BetaPropeller<-DNAJ+TPR | CASPASE+bDLD3      | 292 | NIES4075_09730 | Cyanobacteria                   | Tolypothrix sp. NIES-4075       | hypothetical protein NIES4075_09730 [Tolypothrix sp. NIES-4075].                  | GCA_002218085.1 |
| HID99200.1 | Trypsin+bDLD3→ <i>bDLD3+iSTAND</i> → MoxR-AAA→                                                                                            | Trypsin+bDLD3      | 390 | EYP59_02780    | Gamma                           | Thiotrichaceae bacterium        | TPA: hypothetical protein EYP59_02780 [Thiotrichaceae bacterium].                 | -               |
| HID99201.1 | *bDLD3→                                                                                                                                   |                    | 317 | EYP59_02785    | Gamma                           | Thiotrichaceae bacterium        | TPA: serine protease [Thiotrichaceae bacterium].                                  | -               |
| HIE01287.1 | bDLD3→ <i>bDLD3+ClpABC</i> →                                                                                                              | bDLD3              | 679 | EYP59_13525    | Gamma                           | Thiotrichaceae bacterium        | TPA: AAA family ATPase, partial [Thiotrichaceae bacterium].                       | -               |
| HIE01288.1 | *bDLD3→                                                                                                                                   |                    | 232 | EYP59_13530    | Gamma                           | Thiotrichaceae bacterium        | TPA: hypothetical protein EYP59_13530 [Thiotrichaceae bacterium].                 | -               |
| NER21298.1 | <-HAD  ?→ PNPase+bDLD3*→                                                                                                                  | PNPase+bDLD3       | 346 | F6J96_11435    | Cyanobacteria                   | Symploca sp. SIO1C2             | 5'-methylthioadenosine/S-adenosylhomocysteine nucleosidase [Symploca sp. SIO1C2]. | -               |
| NES00173.1 | PNPase+bDLD3→ bDLD3*→                                                                                                                     | bDLD3              | 58  | F6J86_41320    | Cyanobacteria                   | Symploca sp. SIO1B1             | hypothetical protein F6J86_41320 [Symploca sp. SIO1B1].                           | -               |
| NES19675.1 | bDLD3→ <i>bDLD3+APATPase+TPR</i> →                                                                                                        | bDLD3              | 911 | F6K41_12275    | Cyanobacteria                   | Symploca sp. SIO3E6             | hypothetical protein F6K41_12275 [Symploca sp. SIO3E6].                           | -               |
| NES19676.1 | bDLD3*→                                                                                                                                   | bDLD3              | 72  | F6K41_12280    | Cyanobacteria                   | Symploca sp. SIO3E6             | hypothetical protein F6K41_12280, partial [Symploca sp. SIO3E6].                  | -               |

| acc            | operon                                                                                                                     | architecture                            | len  | gen.name             | taxend              | species                                 | define                                                                                             | gca             |
|----------------|----------------------------------------------------------------------------------------------------------------------------|-----------------------------------------|------|----------------------|---------------------|-----------------------------------------|----------------------------------------------------------------------------------------------------|-----------------|
| NET43317.1     | Trypco2→ TCAD4+CASPASE+bDLD3→ <i>SIG+bDLD3+APATPase</i> →  <-?  ?→  <-?<-?<-?<-?<-Pkinase                                  | TCAD4+CASPASE+bDLD3                     | 537  | F6K15_16045          | Cyanobacteria       | Okeania sp. SIO2B3                      | CHAT domain-containing protein [Okeania sp. SIO2B3].                                               | -               |
| NET43318.1     | SIG+bDLD3+APATPase*→                                                                                                       | SIG+bDLD3+APATPase                      | 241  | F6K15_16050          | Cyanobacteria       | Okeania sp. SIO2B3                      | hypothetical protein F6K15_16050 [Okeania sp. SIO2B3].                                             | -               |
| NET60851.1     | PNPase+bDLD3→ <i>bDLD3+FGS</i> →  <-HAD                                                                                    | PNPase+bDLD3                            | 361  | F6K47_33365          | Cyanobacteria       | Symploca sp. SIO2E6                     | 5'-methylthioadenosine/S-adenosylhomocysteine nucleosidase [Symploca sp. SIO2E6].                  | -               |
| NET60852.1     | bDLD3+FGS*→                                                                                                                | bDLD3+FGS                               | 414  | F6K47_33370          | Cyanobacteria       | Symploca sp. SIO2E6                     | formylglycine-generating enzyme family protein [Symploca sp. SIO2E6].                              | -               |
| NJL79331.1     | PNPase+bDLD3*→ TM+TM+TM+TM→  <-PSE<-PSE<-PsaD                                                                              | PNPase+bDLD3                            | 392  | HC917_11650          | Cyanobacteria       | Richelia sp. SM2_1_7                    | 5'-methylthioadenosine/S-adenosylhomocysteine nucleosidase [Richelia sp. SM2_1_7].                 | -               |
| NJM20757.1     | SIG+Band_7→  <-?  ?→?→?→?→ PNPase+bDLD3*→ TM+TM+TM+TM→  <-PSE<-?<-PsaD                                                     | PNPase+bDLD3                            | 687  | HC907_19595          | Cyanobacteria       | Richelia sp. SM1_7_0                    | 5'-methylthioadenosine/S-adenosylhomocysteine nucleosidase [Richelia sp. SM1_7_0].                 | -               |
| NJN10092.1     | <-PP2C+TM  ?→ SIG+Band_7→  <-?  ?→?→?→ PNPase+bDLD3*→ TM+TM+TM+TM→  <-PSE<-?<-PsaD                                         | PNPase+bDLD3                            | 687  | HC815_19700          | Cyanobacteria       | Richelia sp. RM1_1_1                    | 5'-methylthioadenosine/S-adenosylhomocysteine nucleosidase [Richelia sp. RM1_1_1].                 | -               |
| NJO29889.1     | SIG+Band_7→  <-?  ?→?→?→?→?→ PNPase+bDLD3*→ TM+TM+TM+TM→  <-PSE<-PSE<-PsaD                                                 | PNPase+bDLD3                            | 560  | HC874_21920          | Cyanobacteria       | Richelia sp. SL_2_1                     | 5'-methylthioadenosine/S-adenosylhomocysteine nucleosidase [Richelia sp. SL_2_1].                  | -               |
| NJS15985.1     | PNPase+bDLD3*→                                                                                                             | PNPase+bDLD3                            | 359  | HC787_01195          | Cyanobacteria       | Nostocaceae cyanobacterium CSU_2_110    | 5'-methylthioadenosine/S-adenosylhomocysteine nucleosidase [Nostocaceae cyanobacterium CSU_2_110]. | -               |
| OUL27313.1     | <-TPR+nSTAND1+BetaPropeller<-AAA_22  EAD9+CASPASE+bDLD3*→ PSE→ APATPase+BetaPropeller→ CASPASE→?→  <-CASPASE+GUN4<-CASPASE | EAD9+CASPASE+bDLD3                      | 391  | BV378_11875          | Cyanobacteria       | Nostoc sp. RF31YmG                      | hypothetical protein BV378_11875 [Nostoc sp. RF31Y].                                               | GCA_002155185.1 |
| OUL31312.1     | Uma2→  <-?<-?<-?<-?<-TPR+nSTAND1+BetaPropeller<-AAA_22  EAD9+CASPASE+bDLD3*→ APATPase+BetaPropeller→                       | EAD9+CASPASE+bDLD3                      | 398  | BV372_20335          | Cyanobacteria       | Nostoc sp. T09                          | hypothetical protein BV372_20335 [Nostoc sp. T09].                                                 | GCA_002154695.1 |
| OUL35760.1     | EAD9+CASPASE+bDLD3*→ PSE→ APATPase+BetaPropeller→  <-?  ?→ RelE-ParE→?→?→ RelE-ParE→                                       | EAD9+CASPASE+bDLD3                      | 391  | BV375_01415          | Cyanobacteria       | Nostoc sp. 106C                         | hypothetical protein BV375_01415 [Nostoc sp. 106C].                                                | GCA_002154725.1 |
| PKW31742.1     | Pkinase+bDLD3*→  <-TPR+TPR+Caspase<-vWA-L+TM+CASPASE<-VWA<-MoxR-AAA<-bDLD3+iSTAND2<-?  TCAD9+Pkinase+bDLD3→                | Pkinase+bDLD3                           | 501  | CLT72_1056           | Actinobacteria      | Micromonospora sp. CNZ309               | hypothetical protein CLT72_1056 [Micromonospora sp. CNZ309].                                       | GCA_002846525.1 |
| RKZ54270.1     | CASPASE+APATPase+bDLD3→ <i>bDLD3+EAD2+Pkinase+TM+TM+TM+TM+TM+TM+TM+TM+TM</i> →                                             | CASPASE+APATPase+bDLD3                  | 663  | DRR00_01560          | Gammaproteobacteria | Gammaproteobacteria bacterium           | hypothetical protein DRR00_01560 [Gammaproteobacteria bacterium].                                  | GCA_003645185.1 |
| RKZ54271.1     | bDLD3+EAD2+Pkinase+TM+TM+TM+TM+TM+TM+TM*→                                                                                  | bDLD3+EAD2+Pkinase+TM+TM+TM+TM+TM+TM+TM | 935  | DRR00_01565          | Gammaproteobacteria | Gammaproteobacteria bacterium           | hypothetical protein DRR00_01565 [Gammaproteobacteria bacterium].                                  | GCA_003645185.1 |
| RYZ09240.1     | EAD5+CASPASE+bDLD3*→                                                                                                       | EAD5+CASPASE+bDLD3                      | 775  | EOO73_05625          | Deltaproteobacteria | Myxococcales bacterium                  | caspase family protein [Myxococcales bacterium].                                                   | GCA_004193285.1 |
| RZU04509.1     | Pkinase+bDLD3*→ bDLD3+TPR→?→?→  <-?  ?→  <-?<-BACTERIALFRINGE+TM+TM                                                        | Pkinase+bDLD3                           | 594  | EV371_0866           | Actinobacteria      | Plantactinospora sp. CNZ321             | hypothetical protein EV371_0866 [Plantactinospora sp. CNZ321].                                     | GCA_004217235.1 |
| SFL94903.1     | <-SIG+HAD<-?<-KAP-NTPase  TIR+bDLD3*→ bDLD3+nSTAND1+FGS→  <-?<-NACHT+FGS<-ABhydrolase+bDLD3<-?<-?  LexA-protease→          | TIR+bDLD3                               | 254  | SAMN05421863_1007111 | Betaproteobacteria  | Nitrosomonas communis                   | TIR domain-containing protein [Nitrosomonas communis].                                             | GCA_900114745.1 |
| SPT51846.1     | SIG+TM+TM+NACHT+APATPase+TPR+TPR+TPR→  <-?<-?  ?→?→?→?→ SIG+bDLD3*→                                                        | SIG+bDLD3                               | 301  | NCTC11373_02572      | Actinobacteria      | Actinomadura madurae                    | Uncharacterised protein [Actinomadura madurae].                                                    | GCA_900445005.1 |
| TVR58388.1     | TIR+bDLD3→ <i>bDLD3+nSTAND1+FGS</i> →?→  <-NACHT+FGS                                                                       | TIR+bDLD3                               | 802  | EA420_17215          | Gammaproteobacteria | Candidatus Competibacteraceae bacterium | hypothetical protein EA420_17215 [Candidatus Competibacteraceae bacterium].                        | GCA_007695245.1 |
| TVR58389.1     | TIR+bDLD3*→                                                                                                                | TIR+bDLD3                               | 268  | EA420_17220          | Gammaproteobacteria | Candidatus Competibacteraceae bacterium | tol/interleukin-1 receptor domain-containing protein [Candidatus Competibacteraceae bacterium].    | GCA_007695245.1 |
| WP_009738298.1 | bDLD3+NACHT+BetaPropeller→ <i>TPR+TPR+Caspase</i> →  <-Pkinase+bDLD3                                                       | bDLD3+NACHT+BetaPropeller               | 1268 | FRAQA3DRAFT_RS06645  | Actinobacteria      | Frankia sp. QA3                         | AAA family ATPase [Frankia sp. QA3].                                                               | GCF_000262465.1 |
| WP_009738300.1 | Pkinase+bDLD3*→                                                                                                            | Pkinase+bDLD3                           | 513  | FRAQA3DRAFT_RS06645  | Actinobacteria      | Frankia sp. QA3                         | hypothetical protein [Frankia sp. QA3].                                                            | GCF_000262465.1 |

| acc            | operon                                                                                                                       | architecture                             | len | gen.name          | taxend                          | species                             | define                                                                                       | gca             |
|----------------|------------------------------------------------------------------------------------------------------------------------------|------------------------------------------|-----|-------------------|---------------------------------|-------------------------------------|----------------------------------------------------------------------------------------------|-----------------|
| WP_030438849.1 | PNPase+bDLD3→ <i>bDLD3+TM</i> →  <-?<-?<-?<-?<-ACYC                                                                          | PNPase+bDLD3                             | 254 | IH26_RS0125970    | Actinobacteria                  | Actinoplanes subtropicus            | hypothetical protein [Actinoplanes subtropicus].                                             | GCF_000721705.1 |
| WP_033090725.1 | <-SIG+NPCBM<-TM+TM+TM+TM  ?→?→ PNPase+bDLD3→ <i>bDLD3+NPCBM</i> → TM+NPCBM→  <-LD-peptidase<-?<-HD  ?→ GNTR-HTH→             | PNPase+bDLD3                             | 279 | NSERUTF1_RS23480  | Actinobacteria                  | Nocardia seriolae                   | hypothetical protein [Nocardia seriolae].                                                    | GCF_002356035.1 |
| WP_038072636.1 | PNPase+bDLD3*→ TM+TM+TM+TM→ PSE→  <-?<-?<-PsaD                                                                               | PNPase+bDLD3                             | 672 | HC643_RS13555     | Cyanobacteria                   | Tolypothrix bouteillei              | hypothetical protein [Tolypothrix bouteillei].                                               | GCF_000760695.4 |
| WP_044290893.1 | <-TCAD10<-?<-?  ?→  <-?  ?→ bDLD3+APATPase*→ APATPase+BetaPropeller→                                                         | bDLD3+APATPase                           | 327 | RIV7116_RS11765   | Cyanobacteria                   | Rivularia sp. PCC 7116              | hypothetical protein [Rivularia sp. PCC 7116].                                               | GCF_000316665.1 |
| WP_051808508.1 | PNPase+bDLD3*→                                                                                                               | PNPase+bDLD3                             | 394 | IH26_RS0125965    | Actinobacteria                  | Actinoplanes subtropicus            | hypothetical protein [Actinoplanes subtropicus].                                             | GCF_000721705.1 |
| WP_051809451.1 | PNPase+bDLD3*→                                                                                                               | PNPase+bDLD3                             | 413 | IH26_RS0141600    | Actinobacteria                  | Actinoplanes subtropicus            | hypothetical protein [Actinoplanes subtropicus].                                             | GCF_000721705.1 |
| WP_052086955.1 | bDLD3+NPCBM*→                                                                                                                | bDLD3+NPCBM                              | 241 | NSERUTF1_RS23475  | Actinobacteria                  | Nocardia seriolae                   | NPCBM/NEW2 domain-containing protein [Nocardia seriolae].                                    | GCF_002356035.1 |
| WP_063628695.1 | CASPASE+bDLD3*→ APATPase+BetaPropeller→  <-?  ?→ Calcineurin→?→ Calcineurin→                                                 | CASPASE+bDLD3                            | 292 | TOL9009_RS39910   | Cyanobacteria                   | [Scytonema hofmanni] UTEX B 1581    | CHAT domain-containing protein [[Scytonema hofmanni] UTEX B 1581].                           | GCF_000582685.1 |
| WP_074904183.1 | <-LexA-protease  ?→?→ ABhydrolase+bDLD3→ <i>NACHT+FGS</i> →  <- <i>bDLD3+nSTAND1+FGS</i> <-TIR+bDLD3*                        | ABhydrolase+bDLD3                        | 363 | BM122_RS04970     | Betaproteobacteria              | Nitrosomonas communis               | hypothetical protein [Nitrosomonas communis].                                                | GCF_900114745.1 |
| WP_074904186.1 | SIG+bDLD3+nSTAND1+FGS*→                                                                                                      | SIG+bDLD3+nSTAND1+FGS                    | 823 | BM122_RS04980     | Betaproteobacteria              | Nitrosomonas communis               | SUMF1/EgtB/PvdO family nonheme iron enzyme [Nitrosomonas communis].                          | GCF_900114745.1 |
| WP_074904188.1 | TIR+bDLD3*→                                                                                                                  | TIR+bDLD3                                | 277 | BM122_RS04985     | Betaproteobacteria              | Nitrosomonas communis               | TIR domain-containing protein [Nitrosomonas communis].                                       | GCF_900114745.1 |
| WP_081986291.1 | PNPase+bDLD3*→ bDLD3+NPCBM→ TM+NPCBM→  <-LD-peptidase<-?<-HD  ?→ GNTR-HTH→                                                   | PNPase+bDLD3                             | 285 | GL308_RS29360     | Actinobacteria                  | Nocardia seriolae                   | hypothetical protein [Nocardia seriolae].                                                    | GCF_003667075.1 |
| WP_082062736.1 | <-SIG+NPCBM<-TM+TM+TM+TM  PNPase+bDLD3*→ bDLD3+NPCBM→ TM+NPCBM→  <-PSE<-?<-HD  ?→ GNTR-HTH→                                  | PNPase+bDLD3                             | 397 | AOQ36_RS28625     | Actinobacteria                  | Nocardia seriolae                   | 5'-methylthioadenosine/S-adenosylhomocysteine nucleosidase [Nocardia seriolae].              | GCF_000583715.2 |
| WP_086688304.1 | Uma2→  <-?<-?<-?<-?<-TPR+nSTAND1+BetaPropeller<-AAA_22  CASPASE+bDLD3*→                                                      | CASPASE+bDLD3                            | 288 | BV372_RS20170     | Cyanobacteria                   | Nostoc sp. T09                      | CHAT domain-containing protein [Nostoc sp. T09].                                             | GCF_002154695.1 |
| WP_086756477.1 | CASPASE+bDLD3*→ APATPase+BetaPropeller→  <-?  ?→ RelE-ParE→?→?→ RelE-ParE→                                                   | CASPASE+bDLD3                            | 303 | BV375_RS01380     | Cyanobacteria                   | Nostoc sp. 106C                     | CHAT domain-containing protein [Nostoc sp. 106C].                                            | GCF_002154725.1 |
| WP_086834185.1 | <-TPR+nSTAND1+BetaPropeller<-AAA_22  CASPASE+bDLD3*→ APATPase+BetaPropeller→ CASPASE→?→  <-CASPASE+GUN4<-CASPASE<-?<-CASPASE | CASPASE+bDLD3                            | 325 | BV378_RS11765     | Cyanobacteria                   | Nostoc sp. RF31YmG                  | CHAT domain-containing protein [Nostoc sp. RF31YmG].                                         | GCF_002155185.1 |
| WP_089718394.1 | TIR+bDLD3→ <i>bDLD3+nSTAND1+FGS</i> →                                                                                        | TIR+bDLD3                                | 798 | FLV43_RS07510     | Nitrospinae/Tectomicrobia group | Candidatus Entotheonella palauensis | SUMF1/EgtB/PvdO family nonheme iron enzyme [Candidatus Entotheonella palauensis].            | GCF_900079105.1 |
| WP_089718395.1 | TIR+bDLD3*→                                                                                                                  | TIR+bDLD3                                | 256 | FLV43_RS07515     | Nitrospinae/Tectomicrobia group | Candidatus Entotheonella palauensis | TIR domain-containing protein [Candidatus Entotheonella palauensis].                         | GCF_900079105.1 |
| WP_089941919.1 | TIR+bDLD3*→  <-NACHT+FGS<-FxSC                                                                                               | TIR+bDLD3                                | 239 | FLV42_RS28560     | Nitrospinae/Tectomicrobia group | Candidatus Entotheonella palauensis | toll/interleukin-1 receptor domain-containing protein [Candidatus Entotheonella palauensis]. | GCF_900079095.1 |
| WP_091254464.1 | NUDIX→?→?→ PNPase+bDLD3*→                                                                                                    | PNPase+bDLD3                             | 438 | GA0070216_RS32615 | Actinobacteria                  | Micromonospora matsumotoense        | hypothetical protein [Micromonospora matsumotoense].                                         | GCF_900091525.1 |
| WP_096595110.1 | Uma2→  <-?<-?  CASPASE+bDLD3*→ APATPase+BetaPropeller→                                                                       | CASPASE+bDLD3                            | 288 | CA733_RS03310     | Cyanobacteria                   | Calothrix sp. NIES-2098             | CHAT domain-containing protein [Calothrix sp. NIES-2098].                                    | GCF_002368175.1 |
| WP_096656445.1 | <-PP2C+TM  ?→ SIG+Band_7→  <-?  ?→?→?→ PNPase+bDLD3*→ TM+TM+TM+TM→?→  <-PsaD                                                 | PNPase+bDLD3                             | 687 | CA729_RS14610     | Cyanobacteria                   | Calothrix parasitica                | 5'-methylthioadenosine/S-adenosylhomocysteine nucleosidase [Calothrix parasitica].           | GCF_002368095.1 |
| WP_096691054.1 | PNPase+bDLD3*→?→  <-?<-PsaD                                                                                                  | PNPase+bDLD3                             | 679 | CDC41_RS35135     | Cyanobacteria                   | unclassified Calothrix              | MULTISPECIES: hypothetical protein [unclassified Calothrix].                                 | GCF_002368455.1 |
| WP_102152967.1 | SIG+CASPASE+bDLD3+APATPase+BetaPropeller*→                                                                                   | SIG+CASPASE+bDLD3+APATPase+BetaPropeller | 955 | CEN39_RS27445     | Cyanobacteria                   | Fischerella thermalis               | hypothetical protein [Fischerella thermalis].                                                | GCF_002870785.1 |
| WP_128137951.1 | bDLD3→?→  <-?<- <i>bDLD3</i>                                                                                                 | bDLD3                                    | 246 | DRA43_RS16270     | Actinobacteria                  | Micromonospora chalcea              | hypothetical protein [Micromonospora chalcea].                                               | GCF_003298855.1 |

| acc            | operon                                                                                                                                                             | architecture        | len | gen.name      | taxend                          | species                                 | define                                                                                   | gca             |
|----------------|--------------------------------------------------------------------------------------------------------------------------------------------------------------------|---------------------|-----|---------------|---------------------------------|-----------------------------------------|------------------------------------------------------------------------------------------|-----------------|
| WP_128137954.1 | bDLD3*→                                                                                                                                                            | bDLD3               | 161 | DRA43_RS16285 | Actinobacteria                  | Micromonospora chalcea                  | hypothetical protein [Micromonospora chalcea].                                           | GCF_003298855.1 |
| WP_130460897.1 | Pkinase+bDLD3→ <i>bDLD3+TPR</i> →?→?→?→  <-?<-BACTERIALFRINGE+TM+TM                                                                                                | Pkinase+bDLD3       | 509 | EV371_RS04300 | Actinobacteria                  | Plantactinospora sp. CNZ321             | hypothetical protein [Plantactinospora sp. CNZ321].                                      | GCF_004217235.1 |
| WP_130460898.1 | bDLD3+TPR*→                                                                                                                                                        | bDLD3+TPR           | 351 | EV371_RS04305 | Actinobacteria                  | Plantactinospora sp. CNZ321             | tetratricopeptide repeat protein [Plantactinospora sp. CNZ321].                          | GCF_004217235.1 |
| WP_130472516.1 | PNPase+bDLD3→ <i>bDLD3</i> →                                                                                                                                       | PNPase+bDLD3        | 374 | EJP87_RS14170 | Alphaproteobacteria             | Candidatus Magnetaquicoccus inordinatus | hypothetical protein [Candidatus Magnetaquicoccus inordinatus].                          | GCF_004217665.1 |
| WP_130472517.1 | bDLD3*→                                                                                                                                                            | bDLD3               | 703 | EJP87_RS14175 | Alphaproteobacteria             | Candidatus Magnetaquicoccus inordinatus | hypothetical protein [Candidatus Magnetaquicoccus inordinatus].                          | GCF_004217665.1 |
| WP_143309823.1 | TIR→ TIR+bDLD3*→                                                                                                                                                   | TIR+bDLD3           | 180 | FLV42_RS32380 | Nitrospinae/Tectomicrobia group | Candidatus Entotheonella palauensis     | hypothetical protein [Candidatus Entotheonella palauensis].                              | GCF_900079095.1 |
| WP_144082196.1 | Pkinase+bDLD3→  <- <i>TPR+TPR+Caspase&lt;-vWA-L+TM+CASPASE&lt;-VWA&lt;-MoxR-AAA&lt;-bDLD3+iSTAND2&lt;-?</i>   TCAD9+Pkinase+bDLD3*→  <-?  ?→  <-?  ?→<br>GNTR-HTH→ | Pkinase+bDLD3       | 334 | CLT72_RS05190 | Actinobacteria                  | Micromonospora sp. CNZ309               | hypothetical protein [Micromonospora sp. CNZ309].                                        | GCF_002846525.1 |
| WP_144082198.1 | TCAD9+Pkinase+bDLD3*→                                                                                                                                              | TCAD9+Pkinase+bDLD3 | 532 | CLT72_RS05200 | Actinobacteria                  | Micromonospora sp. CNZ309               | hypothetical protein [Micromonospora sp. CNZ309].                                        | GCF_002846525.1 |
| WP_146877386.1 | APATPase+TPR+TPR+TPR→  <-?  ?→?→?→ Pkinase+bDLD3→ <i>SIG+bDLD3+MgtE_N</i> →                                                                                        | Pkinase+bDLD3       | 326 | DTB52_RS46895 | Actinobacteria                  | Actinomadura madurae                    | hypothetical protein [Actinomadura madurae].                                             | GCF_900445005.1 |
| WP_146877388.1 | SIG+bDLD3+MgtE_N*→                                                                                                                                                 | SIG+bDLD3+MgtE_N    | 535 | DTB52_RS46900 | Actinobacteria                  | Actinomadura madurae                    | hypothetical protein [Actinomadura madurae].                                             | GCF_900445005.1 |
| WP_147207373.1 | PNPase+bDLD3*→ bDLD3+NPCBM→ TM+NPCBM→  <-LD-peptidase<-?<-HD  ?→ GNTR-HTH→                                                                                         | PNPase+bDLD3        | 281 | NS2_RS30205   | Actinobacteria                  | Nocardia seriolae                       | 5'-methylthioadenosine/S-adenosylhomocysteine nucleosidase, partial [Nocardia seriolae]. | GCF_007990715.1 |
| WP_154788099.1 | <-TM+TM+TM+TM  PNPase+bDLD3→ <i>bDLD3+APATPase</i> → TPR→ TPR→                                                                                                     | PNPase+bDLD3        | 350 | GLP40_RS12945 | Actinobacteria                  | Nocardia sp. CT2-14                     | hypothetical protein [Nocardia sp. CT2-14].                                              | GCF_009708175.1 |
| WP_154788100.1 | bDLD3+APATPase*→                                                                                                                                                   | bDLD3+APATPase      | 500 | GLP40_RS12950 | Actinobacteria                  | Nocardia sp. CT2-14                     | hypothetical protein [Nocardia sp. CT2-14].                                              | GCF_009708175.1 |
| WP_157437393.1 | PNPase+bDLD3*→                                                                                                                                                     | PNPase+bDLD3        | 405 | -             | Actinobacteria                  | Actinoplanes subtropicus                | hypothetical protein [Actinoplanes subtropicus].                                         | -               |
| WP_158241970.1 | SIG+bDLD3*→                                                                                                                                                        | SIG+bDLD3           | 379 | CLT72_RS05165 | Actinobacteria                  | Micromonospora sp. CNZ309               | hypothetical protein [Micromonospora sp. CNZ309].                                        | GCF_002846525.1 |
| WP_158660795.1 | <-SIG+NPCBM<-TM+TM+TM+TM  PNPase+bDLD3→ bDLD3+NPCBM*→ TM+NPCBM→  <-LD-peptidase<-?<-HD  ?→<br>GNTR-HTH→                                                            | bDLD3+NPCBM         | 227 | NS506_RS18405 | Actinobacteria                  | Nocardia seriolae                       | NPCBM/NEW2 domain-containing protein [Nocardia seriolae].                                | GCF_001865855.1 |
| WP_167727085.1 | CASPASE+bDLD3*→ APATPase+BetaPropeller→                                                                                                                            | CASPASE+bDLD3       | 290 | HCG51_RS32855 | Cyanobacteria                   | Tolypothrix sp. PCC 7910                | CHAT domain-containing protein [Tolypothrix sp. PCC 7910].                               | GCF_011769525.1 |

## 2. Source data. Gene neighborhoods and domain architectures of the iSTAND2 systems

| acc            | operon                                                                         | architecture    | len | gen.name          | taxend              | species                           | define                                                                            | gca             |
|----------------|--------------------------------------------------------------------------------|-----------------|-----|-------------------|---------------------|-----------------------------------|-----------------------------------------------------------------------------------|-----------------|
| APR86273.1     | Calcineurin+EAD8→ EAD2?+iSTAND2*→ MoxR→ vWA→ vWA-L+SLOG+PNPase→                | EAD2?+iSTAND2   | 314 | A7982_11622       | deltaproteobacteria | Minicystis rosea                  | Hypothetical protein A7982_11622 [Minicystis rosea].                              | GCA_001931535.1 |
| ARV63238.1     | EAD1+iSTAND2*→                                                                 | EAD1+iSTAND2    | 333 | BZZ01_25840       | cyanobacteria       | Nostocales cyanobacterium HT-58-2 | hypothetical protein BZZ01_25840 [Nostocales cyanobacterium HT-58-2].             | GCA_002163975.1 |
| EFC83428.1     | <-EAD1+TIR  EAD1+iSTAND2*→ MoxR→ vWA→ vWA-L+EAD1+EAD1+cNMP_cyclase→            | EAD1+iSTAND2    | 371 | FrEUN1fDRAFT_3426 | actinobacteria      | Frankia sp. EUN1f                 | hypothetical protein FrEUN1fDRAFT_3426 [Frankia sp. EUN1f].                       | GCA_000177675.1 |
| GAK57647.1     | TIR+iSTAND2*→ MoxR→                                                            | TIR+iSTAND2     | 388 | U27_04614         | bacteria            | Candidatus Vecturithrix granuli   | methyltransferase type 11 [Candidatus Vecturithrix granuli].                      | GCA_000739535.1 |
| GAK60733.1     | TIR+iSTAND2*→                                                                  | TIR+iSTAND2     | 382 | U27_00631         | bacteria            | Candidatus Vecturithrix granuli   | TIR protein [Candidatus Vecturithrix granuli].                                    | GCA_000739535.1 |
| PZN29457.1     | EAD5+EAD7→ EAD8+iSTAND2*→ MoxR→                                                | EAD8+iSTAND2    | 345 | DIU80_09340       | chloroflexi         | Chloroflexi bacterium             | hypothetical protein DIU80_09340 [Chloroflexi bacterium].                         | GCA_003242165.1 |
| WP_006101837.1 | EAD8+iSTAND2*→ MoxR→ vWA→ PSE→                                                 | EAD8+iSTAND2    | 375 | -                 | cyanobacteria       | Coleofasciculus chthonoplastes    | hypothetical protein [Coleofasciculus chthonoplastes].                            | GCF_000155555.1 |
| WP_011611104.1 | ??+iSTAND2*→ MoxR→                                                             | ??+iSTAND2      | 357 | -                 | cyanobacteria       | Trichodesmium erythraeum          | hypothetical protein [Trichodesmium erythraeum].                                  | GCF_000014265.1 |
| WP_015179963.1 | Trypsin→ EAD1+iSTAND2*→ MoxR→ vWA→ vWA-L+HTH→                                  | EAD1+iSTAND2    | 352 | -                 | cyanobacteria       | Crinalium epipsammum              | hypothetical protein [Crinalium epipsammum].                                      | GCF_000317495.1 |
| WP_023806061.1 | EAD5+Trypsin→??+iSTAND2*→ MoxR→ vWA→ vWA-L+REC+HNN+CASPASE→                    | ??+iSTAND2      | 340 | -                 | alphaproteobacteria | Mesorhizobium sp. L2C089B000      | hypothetical protein [Mesorhizobium sp. L2C089B000].                              | GCF_000502355.1 |
| WP_024968615.1 | EAD8+Trypsin_2→?→ EAD8+iSTAND2*→ MoxR→ Uma2→ vWA→ HD+Rela_SpoT+TGS+ACT         | EAD8+iSTAND2    | 387 | -                 | cyanobacteria       | Microcystis aeruginosa            | hypothetical protein [Microcystis aeruginosa].                                    | GCF_000599945.1 |
| WP_033364276.1 | Trypc01→ Trypsin+iSTAND2*→ MoxR→ vWA→ vWA-L+FtsK+FtsK+FtsK+FtsK+FtsK→          | Trypsin+iSTAND2 | 417 | -                 | actinobacteria      | Dactylosporangium aurantiacum     | trypsin-like peptidase domain-containing protein [Dactylosporangium aurantiacum]. | GCF_000716715.1 |
| WP_038071878.1 | EAD1+iSTAND2*→                                                                 | EAD1+iSTAND2    | 200 | -                 | cyanobacteria       | Tolypothrix bouteillei            | hypothetical protein [Tolypothrix bouteillei].                                    | -               |
| WP_073635979.1 | EAD1+iSTAND2*→ MoxR→ vWA→ vWA-L+TIR+GUN4→                                      | EAD1+iSTAND2    | 334 | -                 | cyanobacteria       | Scytonema sp. HK-05               | hypothetical protein [Scytonema sp. HK-05].                                       | GCF_002368235.1 |
| WP_073644499.1 | ??+iSTAND2*→ MoxR→ vWA→ vWA-L+HTH→                                             | ??+iSTAND2      | 291 | -                 | cyanobacteria       | Nostoc calcicola                  | hypothetical protein, partial [Nostoc calcicola].                                 | GCF_001904715.1 |
| WP_077000516.1 | EAD1+Trypsin→ EAD1+iSTAND2*→ MoxR→ vWA→ vWA-L+STAND+HEATs+PUA+MPase(inactive)  | EAD1+iSTAND2    | 320 | -                 | betaproteobacteria  | Variovorax sp. KK3                | hypothetical protein [Variovorax sp. KK3].                                        | GCF_001984055.1 |
| WP_086923325.1 | EAD1+Trypsin→ EAD1+iSTAND2*→ MoxR→ vWA→ vWA-L+STAND+HEATs+PUA+MPase(inactive)→ | EAD1+iSTAND2    | 320 | -                 | betaproteobacteria  | Variovorax sp. JS1663             | hypothetical protein [Variovorax sp. JS1663].                                     | GCF_002157355.1 |
| WP_091114990.1 | EAD1+Trypsin→ EAD1+iSTAND2*→ MoxR→ vWA→ vWA-L+subtilase                        | EAD1+iSTAND2    | 305 | -                 | actinobacteria      | Geodermatophilus dictyosporus     | hypothetical protein [Geodermatophilus dictyosporus].                             | GCF_900115505.1 |
| WP_092544601.1 | EAD1+Trypsin→ EAD1+iSTAND2*→ MoxR→ vWA→ PSE→                                   | EAD1+iSTAND2    | 321 | -                 | actinobacteria      | Actinoplanes derwentensis         | hypothetical protein [Actinoplanes derwentensis].                                 | GCF_900104725.1 |
| WP_101409760.1 | bDDL3+iSTAND2*→                                                                | bDDL3+iSTAND2   | 310 | -                 | actinobacteria      | Micromonospora sp. CNZ309         | hypothetical protein [Micromonospora sp. CNZ309].                                 | -               |
| WP_103920108.1 | EAD1+Trypsin→?→??+iSTAND2*→ MoxR→ vWA→ ParD→ ParE→                             | ??+iSTAND2      | 329 | -                 | gammaproteobacteria | Thiotrichales bacterium HS_08     | hypothetical protein [Thiotrichales bacterium HS_08].                             | GCF_900099115.1 |
| WP_111653783.1 | EAD1+iSTAND2*→                                                                 | EAD1+iSTAND2    | 292 | -                 | actinobacteria      | Actinoplanes lutulentus           | hypothetical protein [Actinoplanes lutulentus].                                   | -               |
| WP_114085439.1 | EAD1+iSTAND2*→ MoxR→ vWA→ pentapeptides+TIR+EAD1+CASPASE                       | EAD1+iSTAND2    | 348 | -                 | cyanobacteria       | Nostoc sp. ATCC 53789             | hypothetical protein [Nostoc sp. ATCC 53789].                                     | GCF_009873495.1 |
| WP_118164052.1 | EAD8+Trypsin_2→?→ EAD8→ iSTAND2*→ MoxR→ vWA→ vWA-L+??                          | iSTAND2         | 223 | -                 | cyanobacteria       | Nostoc sphaeroides                | hypothetical protein [Nostoc sphaeroides].                                        | GCF_003443655.1 |

| acc            | operon                                                             | architecture  | len | gen.name | taxend         | species                  | define                                           | gca             |
|----------------|--------------------------------------------------------------------|---------------|-----|----------|----------------|--------------------------|--------------------------------------------------|-----------------|
| WP_127507280.1 | <-EAD5+Trypsin<-?  EAD2?+iSTAND2*→ MoxR→ vWA→ vWA-L+Trypsin+STAND→ | EAD2?+iSTAND2 | 348 | -        | actinobacteria | Actinoplanes sp. LAM7112 | hypothetical protein [Actinoplanes sp. LAM7112]. | GCF_003999975.1 |

### 3. Source data. Gene neighborhoods and domain architectures of the TERNs3 systems

| acc        | operon                                                                      | architecture                | len | gen.name        | taxend              | species                                 | define                                                                              | gca             |
|------------|-----------------------------------------------------------------------------|-----------------------------|-----|-----------------|---------------------|-----------------------------------------|-------------------------------------------------------------------------------------|-----------------|
| AGZ40701.1 | TIR+TERNS3-N+TERNS3*→ MoxR→  <-?  vWA→ vWA-L+??+a/b_hydrolase→ SLATT+SLATT→ | TIR+TERNS3-N+TERNS3         | 413 | AFR_12075       | actinobacteria      | Actinoplanes friuliensis DSM 7358       | hypothetical protein AFR_12075 [Actinoplanes friuliensis DSM 7358].                 | GCA_000494755.1 |
| AIS01002.1 | bcl2?+TERNS3-N+TERNS3*→                                                     | bcl2?+TERNS3-N+TERNS3       | 294 | SGLAU_25320     | actinobacteria      | Streptomyces glaucescens                | hypothetical protein SGLAU_25320 [Streptomyces glaucescens].                        | GCA_000761215.1 |
| EXG79871.1 | TIR+TERNS3-N_TERNS3*→ MoxR→ vWA→                                            | TIR+TERNS3-N_TERNS3         | 390 | CryarDRAFT_0921 | actinobacteria      | Cryptosporangium arvum DSM 44712        | hypothetical protein CryarDRAFT_0921 [Cryptosporangium arvum DSM 44712].            | GCA_000585375.1 |
| EXI90101.1 | TIR+TERNS3-N+TERNS3*→ MoxR→                                                 | TIR+TERNS3-N+TERNS3         | 420 | AW11_01135      | betaproteobacteria  | Candidatus Accumulibacter sp. BA-93     | hypothetical protein AW11_01135 [Candidatus Accumulibacter sp. BA-93].              | GCA_000585075.1 |
| HAO80527.1 | TIR+TERNS3-N_TERNS3*→ MoxR→                                                 | TIR+TERNS3-N_TERNS3         | 445 | DCQ92_16470     | verrucomicrobia     | Verrucomicrobia subdivision 3 bacterium | TPA: hypothetical protein DCQ92_16470 [Verrucomicrobia subdivision 3 bacterium].    | GCA_003455565.1 |
| HBL29163.1 | CASPASE+TIR+TERNS3-N+TERNS3*→ MoxR→ vWA→                                    | CASPASE+TIR+TERNS3-N+TERNS3 | 690 | DD490_20220     | acidobacteria       | Acidobacteria bacterium                 | TPA: hypothetical protein DD490_20220 [Acidobacteria bacterium].                    | GCA_003504885.1 |
| KDN76873.1 | SLATT+SLATT→ TIR+TERNS3-N+TERNS3*→ MoxR→ vWA→ vWA-L+?+CASPASE→              | TIR+TERNS3-N+TERNS3         | 422 | DF19_14140      | actinobacteria      | Streptomyces olindensis                 | hypothetical protein DF19_14140 [Streptomyces olindensis].                          | GCA_000696115.1 |
| KFB69572.1 | TIR+TERNS3-N+TERNS3*→ MoxR→ vWA→ vWA-L+TIR+FGS_fold→                        | TIR+TERNS3-N+TERNS3         | 443 | CAPSK01_000631  | betaproteobacteria  | Candidatus Accumulibacter sp. SK-01     | hypothetical protein CAPSK01_000631 [Candidatus Accumulibacter sp. SK-01].          | GCA_000584955.2 |
| KFB72205.1 | TIR+TERNS3-N+TERNS3*→ MoxR→ vWA→ vWA-L+TIR+FGS_fold→                        | TIR+TERNS3-N+TERNS3         | 443 | AW09_002623     | betaproteobacteria  | Candidatus Accumulibacter sp. BA-91     | hypothetical protein AW09_002623 [Candidatus Accumulibacter sp. BA-91].             | GCA_000585035.2 |
| KNZ33320.1 | TIR+TERNS3-N+TERNS3*→ MoxR→ vWA→                                            | TIR+TERNS3-N+TERNS3         | 444 | AD742_06935     | betaproteobacteria  | Methylibium sp. NZG                     | hypothetical protein AD742_06935 [Methylibium sp. NZG].                             | GCA_001263235.1 |
| KQP26499.1 | TIR+TERNS3-N+TERNS3*→ MoxR→ vWA→                                            | TIR+TERNS3-N+TERNS3         | 369 | ASF25_21095     | alphaproteobacteria | Methylobacterium sp. Leaf100            | hypothetical protein ASF25_21095 [Methylobacterium sp. Leaf100].                    | GCA_001422845.1 |
| KUI28159.1 | TIR+TERNS3-N+TERNS3*→                                                       | TIR+TERNS3-N+TERNS3         | 467 | AU195_20580     | actinobacteria      | Mycobacterium sp. IS-1496               | hypothetical protein AU195_20580 [Mycobacterium sp. IS-1496].                       | GCA_001499995.1 |
| KUM86142.1 | TIR+TERNS3-N+TERNS3*→ MoxR→ vWA→ vWA-L+??+S1+S1+S1+S1→?→ SLOG→              | TIR+TERNS3-N+TERNS3         | 463 | AQI94_24265     | actinobacteria      | Streptomyces pseudovenezuelae           | hypothetical protein AQI94_24265 [Streptomyces pseudovenezuelae].                   | GCA_001513955.1 |
| KYF52375.1 | trypsin+TERNS3-N+TERNS3*→ MoxR→                                             | trypsin+TERNS3-N+TERNS3     | 503 | BE04_07830      | deltaproteobacteria | Sorangium cellulosum                    | hypothetical protein BE04_07830 [Sorangium cellulosum].                             | GCA_001589195.1 |
| NEM04743.1 | TIR+TERNS3-N_TERNS3*→                                                       | TIR+TERNS3-N_TERNS3         | 444 | GCU54_01715     | actinobacteria      | Geodermatophilus normandii              | toll/interleukin-1 receptor domain-containing protein [Geodermatophilus normandii]. | -               |
| NMQ07203.1 | TIR+TERNS3-N+TERNS3*→ MoxR→ vWA→ vWA-L+TIR+FGS_fold→?→ TIR+TIR+TIR+SLOG→    | TIR+TERNS3-N+TERNS3         | 468 | E4Q08_19150     | betaproteobacteria  | Candidatus Accumulibacter phosphatis    | TIR domain-containing protein [Candidatus Accumulibacter phosphatis].               | -               |

| acc            | operon                                                                                                              | architecture                       | len | gen.name                     | taxend              | species                                            | define                                                                                 | gca             |
|----------------|---------------------------------------------------------------------------------------------------------------------|------------------------------------|-----|------------------------------|---------------------|----------------------------------------------------|----------------------------------------------------------------------------------------|-----------------|
| NMQ29341.1     | TIR+TERN3-N+TERN3*→ MoxR→ vWA→ vWA-L+TIR+FGS_fold→                                                                  | TIR+TERN3-N+TERN3                  | 460 | E4Q23_17175                  | betaproteobacteria  | Candidatus Accumulibacter phosphatis               | TIR domain-containing protein [Candidatus Accumulibacter phosphatis].                  | -               |
| OPC80455.1     | TIR+TERN3-N+TERN3*→ SLATT+SLATT→                                                                                    | TIR+TERN3-N+TERN3                  | 582 | B4N89_05385                  | actinobacteria      | Embleya scabrispora                                | hypothetical protein B4N89_05385 [Embleya scabrispora].                                | GCA_002024165.1 |
| PSK62948.1     | TIR+TERN3-N+TERN3*→ MoxR→ vWA→ vWA-L+??+S1+S1+S1+OST-HTH→                                                           | TIR+TERN3-N+TERN3                  | 452 | B0E53_05125                  | actinobacteria      | Micromonospora sp. MH33                            | hypothetical protein B0E53_05125 [Micromonospora sp. MH33].                            | GCA_003013775.1 |
| PTH87452.1     | TIR+TERN3-N+TERN3*→ MoxR→ vWA→ vWA-L+??+S1+S1+S1+S1→?→ SLOG→                                                        | TIR+TERN3-N+TERN3                  | 463 | C9J60_19135                  | actinobacteria      | Streptomyces sp. A244                              | hypothetical protein C9J60_19135 [Streptomyces sp. A244].                              | GCA_003041235.1 |
| PUB76299.1     | TIR+TERN3-N+TERN3*→ MoxR→                                                                                           | TIR+TERN3-N+TERN3                  | 446 | DBP03_04880                  | gammaproteobacteria | gamma proteobacterium symbiont of Ctena orbiculata | hypothetical protein DBP03_04880 [gamma proteobacterium symbiont of Ctena orbiculata]. | GCA_003058495.1 |
| PZN81550.1     | TIR+TERN3-N+TERN3*→ MoxR→ vWA→ vWA-L+TIR+FGS_fold→                                                                  | TIR+TERN3-N+TERN3                  | 413 | DM484_08310                  | gammaproteobacteria | Candidatus Methyloumidiphilus alinensis            | hypothetical protein DM484_08310 [Candidatus Methyloumidiphilus alinensis].            | GCA_003242955.1 |
| RIK40644.1     | TIR+TERN3-N+TERN3*→                                                                                                 | TIR+TERN3-N+TERN3                  | 425 | DCC55_14310                  | chloroflexi         | Chloroflexi bacterium                              | hypothetical protein DCC55_14310 [Chloroflexi bacterium].                              | GCA_003577005.1 |
| RLJ15768.1     | TIR+TERN3-N+TERN3*→ MoxR→                                                                                           | TIR+TERN3-N+TERN3                  | 445 | DJ030_18025                  | bacteria            | bacterium endosymbiont of Escarpia laminata        | hypothetical protein DJ030_18025 [bacterium endosymbiont of Escarpia laminata].        | GCA_003660225.1 |
| RSO09108.1     | SLATT+SLATT→ TIR+TERN3-N+TERN3*→ MoxR→ vWA→ vWA-L+?+CASPASE→                                                        | TIR+TERN3-N+TERN3                  | 420 | DMH26_01890                  | actinobacteria      | Streptomyces sp. WAC 05379                         | hypothetical protein DMH26_01890 [Streptomyces sp. WAC 05379].                         | GCA_003947555.1 |
| RZL40587.1     | TIR+TERN3-N+TERN3*→ MoxR→ vWA+vWA-L+??+VipA+VipB→                                                                   | TIR+TERN3-N+TERN3                  | 416 | EOP35_00425                  | betaproteobacteria  | Rubrivivax sp.                                     | TIR domain-containing protein [Rubrivivax sp.].                                        | GCA_004211235.1 |
| SDH38921.1     | TIR+TERN3-N+TERN3*→ MoxR→ vWA→ vWA-L+??+S1+S1+S1+OST-HTH→                                                           | TIR+TERN3-N+TERN3                  | 446 | SAMN05216553_120150          | actinobacteria      | Lechevalieria fradiae                              | TIR domain-containing protein [Lechevalieria fradiae].                                 | GCA_900100955.1 |
| TMC21179.1     | PNPase+TIR→?→ TRANSGLUTAMINASE+TIR+TERN3-N+TERN3*→ MoxR→ vWA→ vWA-L+TPRs+PNPase+TIR→                                | TRANSGLUTAMINASE+TIR+TERN3-N+TERN3 | 672 | E6J34_10390                  | chloroflexi         | Chloroflexi bacterium                              | hypothetical protein E6J34_10390 [Chloroflexi bacterium].                              | GCA_005879655.1 |
| VFJ73521.1     | TIR+TERN3-N+TERN3*→ MoxR→                                                                                           | TIR+TERN3-N+TERN3                  | 427 | BECKFW1821C_GA0114237_105240 | gammaproteobacteria | Candidatus Kentron sp. FW                          | TIR domain-containing protein [Candidatus Kentron sp. FW].                             | -               |
| WP_003954434.1 | SLATT+SLATT→?→ MoxR→ vWA→ vWA-L+Betapropeller+TIM_barrel_glycosyl_hydrolase→ TIR+TERN3-N+TERN3*→                    | TIR+TERN3-N+TERN3                  | 415 | -                            | actinobacteria      | Streptomyces clavuligerus                          | toll/interleukin-1 receptor domain-containing protein [Streptomyces clavuligerus].     | GCF_000163875.1 |
| WP_003959455.1 | TIR+TERN3-N+TERN3*→ MoxR→ vWA→                                                                                      | TIR+TERN3-N+TERN3                  | 434 | -                            | actinobacteria      | Streptomyces clavuligerus                          | toll/interleukin-1 receptor domain-containing protein [Streptomyces clavuligerus].     | GCF_000163875.1 |
| WP_005160854.1 | SLATT+SLATT→ TIR+TERN3-N+TERN3*→ MoxR→ vWA→ vWA-L+STAND+TPRs→                                                       | TIR+TERN3-N+TERN3                  | 431 | -                            | actinobacteria      | Amycolatopsis azurea                               | toll/interleukin-1 receptor domain-containing protein [Amycolatopsis azurea].          | GCF_000340415.1 |
| WP_006140008.1 | MoxR→ vWA→ vWA-L+Betapropeller+TIM_barrel_glycosyl_hydrolase→ TIR+TERN3-N+TERN3*→  <-ParA-Soj_NTPase+TIR+STAND+TPRs | TIR+TERN3-N+TERN3                  | 406 | -                            | actinobacteria      | Streptomyces                                       | MULTISPECIES: toll/interleukin-1 receptor domain-containing protein [Streptomyces].    | GCF_000204605.1 |
| WP_009737883.1 | E2+EAD1?→ EAD1+TERN3-N+TERN3*→ MoxR→ vWA→ vWA-L+Tir+Pkinase→ EAD1+fvmYukDI-Nterm+Ub→  <-E1+ZnR?                     | EAD1+TERN3-N+TERN3                 | 372 | -                            | actinobacteria      | Frankia sp. QA3                                    | hypothetical protein [Frankia sp. QA3].                                                | GCF_000262465.1 |
| WP_015037308.1 | SLATT+SLATT→?→ MoxR→ vWA→ vWA-L+Betapropeller+TIM_barrel_glycosyl_hydrolase→ TIR+TERN3-N+TERN3*→                    | TIR+TERN3-N+TERN3                  | 422 | -                            | actinobacteria      | Streptomyces                                       | MULTISPECIES: toll/interleukin-1 receptor domain-containing protein [Streptomyces].    | GCF_000253235.1 |
| WP_029084398.1 | TIR+TERN3-N+TERN3*→ MoxR→ vWA→                                                                                      | TIR+TERN3-N+TERN3                  | 414 | -                            | alphaproteobacteria | Bradyrhizobium sp. th.b2                           | toll/interleukin-1 receptor domain-containing protein [Bradyrhizobium sp. th.b2].      | GCF_000426785.1 |

| acc            | operon                                                                                                     | architecture        | len | gen.name | taxend              | species                        | define                                                                                  | gca             |
|----------------|------------------------------------------------------------------------------------------------------------|---------------------|-----|----------|---------------------|--------------------------------|-----------------------------------------------------------------------------------------|-----------------|
| WP_030935396.1 | SLATT+SLATT→ TIR+TERNS3-N+TERNS3*→ MoxR→ vWA→ vWA-L+TIR+STAND+TPRs→ TIR+STAND+TPRs→                        | TIR+TERNS3-N+TERNS3 | 418 | -        | actinobacteria      | Streptomyces sp. NRRL S-646    | toll/interleukin-1 receptor domain-containing protein [Streptomyces sp. NRRL S-646].    | GCF_000720765.1 |
| WP_053636820.1 | TIR+TERNS3-N+TERNS3*→ MoxR→                                                                                | TIR+TERNS3-N+TERNS3 | 427 | -        | actinobacteria      | Streptomyces sp. XY152         | toll/interleukin-1 receptor domain-containing protein [Streptomyces sp. XY152].         | GCF_001279455.1 |
| WP_058554423.1 | TIR+TERNS3-N+TERNS3*→ MoxR→ vWA→ vWA-L+TIR+FGS_fold→                                                       | TIR+TERNS3-N+TERNS3 | 447 | -        | gammaproteobacteria | Thiohalocapsa sp. ML1          | toll/interleukin-1 receptor domain-containing protein [Thiohalocapsa sp. ML1].          | GCF_001469165.1 |
| WP_062724228.1 | TIR+TERNS3-N+TERNS3*→ MoxR→ vWA→ vWA-L+??+CASPASE+a/b_hydrolase→                                           | TIR+TERNS3-N+TERNS3 | 410 | -        | actinobacteria      | Streptomyces caeruleatus       | toll/interleukin-1 receptor domain-containing protein [Streptomyces caeruleatus].       | GCF_001514235.1 |
| WP_067167006.1 | vWA→ vWA-L+Betapropeller+TIM_barrel_glycosyl_hydrolase→ TIR+TERNS3-N+TERNS3*→                              | TIR+TERNS3-N+TERNS3 | 421 | -        | actinobacteria      | Streptomyces sp. ERV7          | toll/interleukin-1 receptor domain-containing protein [Streptomyces sp. ERV7].          | GCF_001653515.1 |
| WP_067805560.1 | TIR+TERNS3-N+TERNS3*→ MoxR→ vWA→ vWA-L+??+S1+S1+S1→                                                        | TIR+TERNS3-N+TERNS3 | 469 | -        | actinobacteria      | Nocardia beijingensis          | toll/interleukin-1 receptor domain-containing protein [Nocardia beijingensis].          | GCF_001612785.1 |
| WP_070017317.1 | MoxR→ vWA→ vWA-L+Betapropeller+TIM_barrel_glycosyl_hydrolase→ TIR+TERNS3-N+TERNS3*→                        | TIR+TERNS3-N+TERNS3 | 413 | -        | actinobacteria      | Streptomyces nanshensis        | toll/interleukin-1 receptor domain-containing protein [Streptomyces nanshensis].        | GCF_001751255.1 |
| WP_074954915.1 | TIR+TERNS3-N+TERNS3*→ MoxR→                                                                                | TIR+TERNS3-N+TERNS3 | 410 | -        | deltaproteobacteria | Myxococcus fulvus              | toll/interleukin-1 receptor domain-containing protein [Myxococcus fulvus].              | GCF_007991095.1 |
| WP_077058200.1 | <-SLATT+SLATT  ?→ MoxR→ vWA→ vWA-L+Betapropeller+TIM_barrel_glycosyl_hydrolase→ TIR+TERNS3-N+TERNS3*→      | TIR+TERNS3-N+TERNS3 | 436 | -        | actinobacteria      | Streptomyces sp. MP131-18      | toll/interleukin-1 receptor domain-containing protein [Streptomyces sp. MP131-18].      | GCF_001984575.1 |
| WP_078922055.1 | TIR+TERNS3-N+TERNS3*→ MoxR→ vWA→ vWA-L+ZnR+GAF+REC(inactive?)+TIR→                                         | TIR+TERNS3-N+TERNS3 | 406 | -        | gammaproteobacteria | Thiothrix eikelboomii          | toll/interleukin-1 receptor domain-containing protein [Thiothrix eikelboomii].          | GCF_900167255.1 |
| WP_079308407.1 | MoxR→ vWA→ vWA-L+Betapropeller+TIM_barrel_glycosyl_hydrolase→ TIR+TERNS3-N+TERNS3*→                        | TIR+TERNS3-N+TERNS3 | 416 | -        | actinobacteria      | Streptomyces sp. GKU 895       | toll/interleukin-1 receptor domain-containing protein [Streptomyces sp. GKU 895].       | GCF_002027195.1 |
| WP_086569346.1 | TIR+TERNS3-N+TERNS3*→                                                                                      | TIR+TERNS3-N+TERNS3 | 428 | -        | actinobacteria      | Streptomyces alboverticillatus | toll/interleukin-1 receptor domain-containing protein [Streptomyces alboverticillatus]. | GCF_002150845.1 |
| WP_086575434.1 | TIR+TERNS3-N+TERNS3*→ MoxR→                                                                                | TIR+TERNS3-N+TERNS3 | 444 | -        | actinobacteria      | Streptomyces alboverticillatus | toll/interleukin-1 receptor domain-containing protein [Streptomyces alboverticillatus]. | -               |
| WP_093784682.1 | vWA-L+Betapropeller+TIM_barrel_glycosyl_hydrolase→ TIR+TERNS3-N+TERNS3*→  <-ParA-Soj_NTPase+TIR+STAND+TPRs | TIR+TERNS3-N+TERNS3 | 407 | -        | actinobacteria      | Streptomyces guanduensis       | toll/interleukin-1 receptor domain-containing protein [Streptomyces guanduensis].       | GCF_900103985.1 |
| WP_093909564.1 | TIR+TERNS3-N+TERNS3*→ MoxR→ vWA→ vWA-L+??+CASPASE+a/b_hydrolase→                                           | TIR+TERNS3-N+TERNS3 | 410 | -        | actinobacteria      | Streptomyces sp. cf386         | toll/interleukin-1 receptor domain-containing protein [Streptomyces sp. cf386].         | GCF_900103585.1 |
| WP_109500779.1 | TIR+TERNS3-N+TERNS3*→ MoxR→ vWA→                                                                           | TIR+TERNS3-N+TERNS3 | 573 | -        | actinobacteria      | Streptomyces sp. Act143        | toll/interleukin-1 receptor domain-containing protein [Streptomyces sp. Act143].        | GCF_003143935.1 |
| WP_109888160.1 | SLATT+SLATT→ TIR+TERNS3-N+TERNS3*→ MoxR→                                                                   | TIR+TERNS3-N+TERNS3 | 423 | -        | actinobacteria      | Streptomyces sp. NEAU-S7GS2    | toll/interleukin-1 receptor domain-containing protein [Streptomyces sp. NEAU-S7GS2].    | GCF_003173275.1 |

| acc            | operon                                                                              | architecture        | len | gen.name | taxend              | species                         | define                                                                               | gca             |
|----------------|-------------------------------------------------------------------------------------|---------------------|-----|----------|---------------------|---------------------------------|--------------------------------------------------------------------------------------|-----------------|
| WP_111601039.1 | MoxR→ vWA→ vWA-L+Betapropeller+TIM_barrel_glycosyl_hydrolase→ TIR+TERNS3-N+TERNS3*→ | TIR+TERNS3-N+TERNS3 | 417 | -        | actinobacteria      | Streptomyces sp. Amel2xB2       | toll/interleukin-1 receptor domain-containing protein [Streptomyces sp. Amel2xB2].   | GCF_003259355.1 |
| WP_114029261.1 | TIR+TERNS3-N+TERNS3*→ MoxR→ vWA→ vWA-L+??+S1+S1+S1→                                 | TIR+TERNS3-N+TERNS3 | 456 | -        | actinobacteria      | Sphaerisporangium album         | toll/interleukin-1 receptor domain-containing protein [Sphaerisporangium album].     | GCF_003323745.1 |
| WP_120606365.1 | TIR+TERNS3-N+TERNS3*→ MoxR→                                                         | TIR+TERNS3-N+TERNS3 | 410 | -        | deltaproteobacteria | Coralloccoccus sp. CA043D       | toll/interleukin-1 receptor domain-containing protein [Coralloccoccus sp. CA043D].   | GCF_003611695.1 |
| WP_121007100.1 | SLATT+SLATT→ TIR+TERNS3-N+TERNS3*→ MoxR→ vWA→ vWA-L+STAND+TPRs→                     | TIR+TERNS3-N+TERNS3 | 404 | -        | actinobacteria      | Saccharothrix australiensis     | toll/interleukin-1 receptor domain-containing protein [Saccharothrix australiensis]. | GCF_003634935.1 |
| WP_128963913.1 | TIR+TERNS3-N+TERNS3*→ MoxR→ vWA→ vWA-L+CASPASE+TPRs                                 | TIR+TERNS3-N+TERNS3 | 417 | -        | alphaproteobacteria | Bradyrhizobium guangdongense    | TIR domain-containing protein [Bradyrhizobium guangdongense].                        | GCF_004114975.1 |
| WP_132123911.1 | TIR+TERNS3-N_TERNS3*→ MoxR→ vWA→ vWA-L+STAND+TPRs→                                  | TIR+TERNS3-N_TERNS3 | 423 | -        | actinobacteria      | Actinocrispum wychmicini        | toll/interleukin-1 receptor domain-containing protein [Actinocrispum wychmicini].    | GCF_004345645.1 |
| WP_133291404.1 | TIR+TERNS3-N+TERNS3*→ MoxR→ vWA→ vWA+vWA-L+??+VipA+VipB→                            | TIR+TERNS3-N+TERNS3 | 412 | -        | alphaproteobacteria | Dankookia rubra                 | toll/interleukin-1 receptor domain-containing protein [Dankookia rubra].             | GCF_004355005.1 |
| WP_141296792.1 | TIR+TERNS3-N+TERNS3*→                                                               | TIR+TERNS3-N+TERNS3 | 572 | -        | actinobacteria      | Streptomyces gardneri           | TIR domain-containing protein [Streptomyces gardneri].                               | -               |
| WP_141982648.1 | TIR+TERNS3-N_TERNS3*→ MoxR→ vWA→ vWA-L+STAND+TPRs→                                  | TIR+TERNS3-N_TERNS3 | 423 | -        | actinobacteria      | Saccharothrix saharensis        | TIR domain-containing protein [Saccharothrix saharensis].                            | GCF_006716745.1 |
| WP_143049943.1 | TIR+TERNS3-N+TERNS3*→ MoxR→                                                         | TIR+TERNS3-N+TERNS3 | 427 | -        | actinobacteria      | Asanoa ishikariensis            | toll/interleukin-1 receptor domain-containing protein [Asanoa ishikariensis].        | GCF_900107455.1 |
| WP_146519555.1 | TIR+TERNS3-N+TERNS3*→ MoxR→ vWA+vWA-L+??+VipA+VipB→                                 | TIR+TERNS3-N+TERNS3 | 417 | -        | planctomycetes      | Planctomycetes bacterium Pla52n | TIR domain-containing protein [Planctomycetes bacterium Pla52n].                     | GCF_007860045.1 |
| WP_146520106.1 | TIR+TERNS3-N+TERNS3*→ MoxR→ vWA→ vWA-L+??+S1+??+S1+??→                              | TIR+TERNS3-N+TERNS3 | 616 | -        | planctomycetes      | Planctomycetes bacterium Pla52n | TIR domain-containing protein [Planctomycetes bacterium Pla52n].                     | GCF_007860045.1 |
| WP_149224808.1 | TIR+TERNS3-N+TERNS3*→ MoxR→ vWA+vWA-L+??+Calcineurin+??+REase→                      | TIR+TERNS3-N+TERNS3 | 407 | -        | alphaproteobacteria | Azospirillum sp. B21            | TIR domain-containing protein [Azospirillum sp. B21].                                | GCF_008364825.1 |
| WP_150234755.1 | SLATT+SLATT→ TIR+TERNS3-N+TERNS3*→ MoxR→ vWA→ vWA-L+?+CASPASE→                      | TIR+TERNS3-N+TERNS3 | 423 | -        | actinobacteria      | Streptomyces filamentosus       | TIR domain-containing protein [Streptomyces filamentosus].                           | -               |
| WP_153453600.1 | SLATT+SLATT→ TIR+TERNS3-N+TERNS3*→ MoxR→ vWA→ vWA-L+TIR+STAND+TPRs→ TIR+STAND+TPRs→ | TIR+TERNS3-N+TERNS3 | 424 | -        | actinobacteria      | Streptomyces sp. RB5            | TIR domain-containing protein [Streptomyces sp. RB5].                                | GCF_009604385.1 |
| WP_157858102.1 | TIR+TERNS3-N+TERNS3*→ MoxR→ vWA→ vWA-L+??+CASPASE+a/b_hydrolase→                    | TIR+TERNS3-N+TERNS3 | 414 | -        | actinobacteria      | Streptomyces durhamensis        | TIR domain-containing protein [Streptomyces durhamensis].                            | GCF_000725475.1 |
| WP_158088688.1 | SLATT+SLATT→ TIR+TERNS3-N+TERNS3*→ MoxR→ vWA→ vWA-L+Trypsin+STAND+TPRs→             | TIR+TERNS3-N+TERNS3 | 419 | -        | actinobacteria      | Thermoactinospora rubra         | TIR domain-containing protein [Thermoactinospora rubra].                             | GCF_002093975.1 |
| WP_158625805.1 | TIR+TERNS3-N+TERNS3*→ MoxR→                                                         | TIR+TERNS3-N+TERNS3 | 409 | -        | deltaproteobacteria | Coralloccoccus carmarthensis    | TIR domain-containing protein [Coralloccoccus carmarthensis].                        | GCF_003611695.1 |
| WP_158626622.1 | <-TIR+TIR+TIR+SLOG  ?→?→ TIR+TERNS3-N+TERNS3*→ MoxR→ vWA→ vWA-L+TIR+STAND+TPRs→     | TIR+TERNS3-N+TERNS3 | 413 | -        | deltaproteobacteria | Coralloccoccus interemptor      | TIR domain-containing protein [Coralloccoccus interemptor].                          | GCF_003668875.1 |
| WP_158997559.1 | TIR+TERNS3-N+TERNS3*→ MoxR→ vWA→ vWA-L+?+STAND+TPRs→                                | TIR+TERNS3-N+TERNS3 | 440 | -        | actinobacteria      | Streptomyces aureus             | TIR domain-containing protein [Streptomyces aureus].                                 | GCF_000725495.1 |
| WP_159049469.1 | TIR+TERNS3-N+TERNS3*→ MoxR→ vWA→ vWA-L+TIR+STAND+TPRs→                              | TIR+TERNS3-N+TERNS3 | 435 | -        | actinobacteria      | Streptomyces sp. NRRL WC-3618   | TIR domain-containing protein [Streptomyces sp. NRRL WC-3618].                       | GCF_001280005.1 |
| WP_159688556.1 | TIR+TERNS3-N+TERNS3*→ MoxR→ vWA→ vWA-L+CASPASE+a/b_hydrolase+TIR→                   | TIR+TERNS3-N+TERNS3 | 438 | -        | betaproteobacteria  | Azoarcus sp. HKLI-1             | TIR domain-containing protein [Azoarcus sp. HKLI-1].                                 | GCF_009800965.1 |

| acc            | operon                                                                        | architecture        | len | gen.name | taxend              | species                  | define                                                                   | gca             |
|----------------|-------------------------------------------------------------------------------|---------------------|-----|----------|---------------------|--------------------------|--------------------------------------------------------------------------|-----------------|
| WP_164008272.1 | TIR+TERNS3-N+TERNS3*→ MoxR→                                                   | TIR+TERNS3-N+TERNS3 | 402 | -        | deltaproteobacteria | Pyxidicoccus sp. AB060A  | TIR domain-containing protein [Pyxidicoccus sp. AB060A].                 | GCF_010894435.1 |
| WP_168498259.1 | vWA→ vWA-L+Betapropeller+TIM_barrel_glycosyl_hydrolase→ TIR+TERNS3-N+TERNS3*→ | TIR+TERNS3-N+TERNS3 | 417 | -        | actinobacteria      | Streptomyces sp. RLB1-33 | TIR domain-containing protein [Streptomyces sp. RLB1-33].                | GCF_012273535.1 |
| WP_169849771.1 | TIR+TERNS3-N+TERNS3*→ MoxR→                                                   | TIR+TERNS3-N+TERNS3 | 403 | -        | deltaproteobacteria | Corallococcus exiguus    | TIR domain-containing protein [Corallococcus exiguus].                   | GCF_012985275.1 |
| WP_170164844.1 | TIR+TERNS3-N+TERNS3*→ MoxR→ vWA→ vWA-L+TIR+FGS_fold→                          | TIR+TERNS3-N+TERNS3 | 416 | -        | gammaproteobacteria | Thiocapsa rosea          | toll/interleukin-1 receptor domain-containing protein [Thiocapsa rosea]. | GCF_003634315.1 |

4. Source data. Gene neighborhoods and domain architectures of the bacterial NPCBM domain described in this study

| acc            | operon                                                                                        | architecture | len | gen.name            | taxend         | species                                          | define                                                                                 | gca             |
|----------------|-----------------------------------------------------------------------------------------------|--------------|-----|---------------------|----------------|--------------------------------------------------|----------------------------------------------------------------------------------------|-----------------|
| APA97851.1     | <-SIG+NPCBM<-?  PNPase+bDLD3→ bDLD3+NPCBM*→ DUF1707-SHOCT-bihelical+TM+NPCBM→  <-LD-peptidase | bDLD3+NPCBM  | 217 | NS506_03802         | actinobacteria | Nocardia seriolae                                | hypothetical protein NS506_03802 [Nocardia seriolae].                                  | GCA_001865855.1 |
| ATE54357.1     | HTH+APATPase+TPR→?→ TIR+SWACOS→ SIG+TIR+APATPase+TPR+TPR+TPR→?→ TIR+NPCBM*→                   | TIR+NPCBM    | 345 | CNX65_14540         | actinobacteria | Actinosynnema pretiosum                          | hypothetical protein CNX65_14540 [Actinosynnema pretiosum].                            | GCA_002354875.1 |
| OLO83644.1     | NPCBM*→                                                                                       | NPCBM        | 151 | BKH12_07845         | actinobacteria | Actinomyces naeslundii                           | hypothetical protein BKH12_07845 [Actinomyces naeslundii].                             | GCA_001937595.1 |
| ONF63682.1     | TIR+NPCBM*→                                                                                   | TIR+NPCBM    | 322 | AVR91_0232695       | actinobacteria | Amycolatopsis keratiniphila subsp. keratiniphila | hypothetical protein AVR91_0232695 [Amycolatopsis keratiniphila subsp. keratiniphila]. | GCA_001620365.2 |
| QFU87533.1     | TIR+NPCBM*→  <-?<-?<-AAA<-TIR+Pkinase                                                         | TIR+NPCBM    | 325 | YIM_11700           | actinobacteria | Amycolatopsis sp. YIM 10                         | SEFIR domain protein [Amycolatopsis sp. YIM 10].                                       | -               |
| RLK54954.1     | TIR+NPCBM*→                                                                                   | TIR+NPCBM    | 326 | CLV68_5345          | actinobacteria | Actinokineospora cianjurenensis                  | SEFIR domain-containing protein [Actinokineospora cianjurenensis].                     | GCA_003663795.1 |
| RSD09590.1     | <-AAA?<-?<-ParA+TIR+pIdsmall1<-TIR  TIR+NPCBM*→                                               | TIR+NPCBM    | 433 | EIY87_41985         | actinobacteria | Amycolatopsis sp. GLM-1                          | TIR domain-containing protein [Amycolatopsis sp. GLM-1].                               | GCA_003937945.1 |
| RSM57848.1     | TIR+NPCBM*→  <-SIGMA-HTH                                                                      | TIR+NPCBM    | 327 | DMH03_26220         | actinobacteria | Amycolatopsis sp. WAC 01376                      | hypothetical protein DMH03_26220 [Amycolatopsis sp. WAC 01376].                        | GCA_003947415.1 |
| RSM82716.1     | TIR+NPCBM*→  <-SIGMA-HTH                                                                      | TIR+NPCBM    | 327 | DL991_05030         | actinobacteria | Amycolatopsis sp. WAC 01375                      | hypothetical protein DL991_05030 [Amycolatopsis sp. WAC 01375].                        | GCA_003947325.1 |
| RSN39203.1     | <-TIR<-AAA?<-?<-ParA+TIR+pIdsmall1<-TIR  TIR+NPCBM*→                                          | TIR+NPCBM    | 343 | DMC64_39445         | actinobacteria | Amycolatopsis sp. WAC 04197                      | hypothetical protein DMC64_39445 [Amycolatopsis sp. WAC 04197].                        | GCA_003947475.1 |
| RSN62459.1     | TIR+NPCBM*→  <-SIGMA-HTH                                                                      | TIR+NPCBM    | 327 | DMH01_07185         | actinobacteria | Amycolatopsis sp. WAC 04182                      | hypothetical protein DMH01_07185 [Amycolatopsis sp. WAC 04182].                        | GCA_003947465.1 |
| SCF21250.1     | SIG+NPCBM*→                                                                                   | SIG+NPCBM    | 246 | GA0070563_106214    | actinobacteria | Micromonospora carbonacea                        | NPCBM/NEW2 domain-containing protein [Micromonospora carbonacea].                      | GCA_900091535.1 |
| SDD51526.1     | TIR+NPCBM*→                                                                                   | TIR+NPCBM    | 295 | SAMN05216174_11273  | actinobacteria | Alloactinosynnema iranicum                       | NPCBM/NEW2 domain-containing protein [Alloactinosynnema iranicum].                     | GCA_900101685.1 |
| SDI31347.1     | TIR+NPCBM*→                                                                                   | TIR+NPCBM    | 292 | SAMN05421871_10490  | actinobacteria | Alloactinosynnema album                          | NPCBM/NEW2 domain-containing protein [Alloactinosynnema album].                        | GCA_900099755.1 |
| SDW33810.1     | TIR+NPCBM*→  <-SIGMA-HTH                                                                      | TIR+NPCBM    | 318 | SAMN05421504_101304 | actinobacteria | Amycolatopsis xylanica                           | NPCBM/NEW2 domain-containing protein [Amycolatopsis xylanica].                         | GCA_900107045.1 |
| SER09138.1     | TIR+NPCBM*→                                                                                   | TIR+NPCBM    | 326 | SAMN04487818_101553 | actinobacteria | Actinokineospora terrae                          | NPCBM/NEW2 domain-containing protein [Actinokineospora terrae].                        | GCA_900111175.1 |
| SES13392.1     | <-TIR<-Pkinase+PASTA+NPCBM  TIR+NPCBM*→?→  <-?<-?<-?  SIG+Phytase-like→                       | TIR+NPCBM    | 369 | SAMN04488000_116167 | actinobacteria | Lentzea albida                                   | NPCBM/NEW2 domain-containing protein [Lentzea albida].                                 | GCA_900111005.1 |
| WP_003100488.1 | TIR+NPCBM*→  <-Pkinase+PASTA+NPCBM                                                            | TIR+NPCBM    | 330 | H480_RS44040        | actinobacteria | Amycolatopsis vancoresmycina                     | TIR domain-containing protein [Amycolatopsis vancoresmycina].                          | GCF_000388135.1 |
| WP_004558432.1 | TIR+NPCBM*→  <-?<-PSE  DeoR→                                                                  | TIR+NPCBM    | 323 | H480_RS29455        | actinobacteria | Amycolatopsis vancoresmycina                     | TIR domain-containing protein [Amycolatopsis vancoresmycina].                          | GCF_000388135.1 |
| WP_018681508.1 | TIR+NPCBM*→                                                                                   | TIR+NPCBM    | 320 | C503_RS0107190      | actinobacteria | Actinokineospora enzanensis                      | TIR domain-containing protein [Actinokineospora enzanensis].                           | GCF_000374445.1 |
| WP_019932839.1 | <-HTH+APATPase+TPR  ?→?→ TPR+TM+TM→ TIR+NPCBM*→ DUF1707-SHOCT-bihelical+TM+NPCBM→             | TIR+NPCBM    | 369 | G361_RS0140320      | actinobacteria | Nocardia sp. BMG111209                           | TIR domain-containing protein [Nocardia sp. BMG111209].                                | GCF_000381925.1 |

| acc            | operon                                                                 | architecture | len | gen.name          | taxend         | species                       | define                                                            | gca             |
|----------------|------------------------------------------------------------------------|--------------|-----|-------------------|----------------|-------------------------------|-------------------------------------------------------------------|-----------------|
| WP_026425923.1 | TIR+NPCBM*→                                                            | TIR+NPCBM    | 324 | H504_RS0130665    | actinobacteria | Actinokineospora inagensis    | TIR domain-containing protein [Actinokineospora inagensis].       | GCF_000482865.1 |
| WP_043787644.1 | TIR+NPCBM*→  <-?  DeoR→                                                | TIR+NPCBM    | 323 | DV20_RS35395      | actinobacteria | Amycolatopsis rifamycinica    | TIR domain-containing protein [Amycolatopsis rifamycinica].       | GCF_000695625.1 |
| WP_043833411.1 | TIR+NPCBM*→                                                            | TIR+NPCBM    | 317 | L943_RS22200      | actinobacteria | Amycolatopsis orientalis      | TIR domain-containing protein [Amycolatopsis orientalis].         | GCF_000411995.1 |
| WP_051173847.1 | TIR+NPCBM*→                                                            | TIR+NPCBM    | 311 | L324_RS40905      | actinobacteria | Amycolatopsis orientalis      | TIR domain-containing protein [Amycolatopsis orientalis].         | GCF_000478275.1 |
| WP_051729748.1 | TIR+NPCBM*→                                                            | TIR+NPCBM    | 317 | IF70_RS45275      | actinobacteria | Streptomyces sp. NRRL F-3213  | TIR domain-containing protein [Streptomyces sp. NRRL F-3213].     | GCF_000720075.1 |
| WP_051913277.1 | TIR+NPCBM*→  <-?<-?<-HTH+APATPase+TPR                                  | TIR+NPCBM    | 297 | KALB_RS43740      | actinobacteria | Kutzneria albida              | TIR domain-containing protein [Kutzneria albida].                 | GCF_000525635.1 |
| WP_051972565.1 | TIR+NPCBM*→                                                            | TIR+NPCBM    | 311 | AJAP_RS42550      | actinobacteria | Amycolatopsis japonica        | TIR domain-containing protein [Amycolatopsis japonica].           | GCF_000732925.1 |
| WP_052086955.1 | PNPase+bDLD3→ bDLD3+NPCBM*→?→  <-LD-peptidase                          | bDLD3+NPCBM  | 241 | FH09_RS38115      | actinobacteria | Nocardia seriolae             | NPCBM/NEW2 domain-containing protein [Nocardia seriolae].         | GCF_002356035.1 |
| WP_052120938.1 | TIR+NPCBM*→                                                            | TIR+NPCBM    | 311 | ED92_RS41465      | actinobacteria | Amycolatopsis sp. MJM2582     | TIR domain-containing protein [Amycolatopsis sp. MJM2582].        | GCF_000754115.1 |
| WP_053738304.1 | <-TIR+SWACOS  TIR+NPCBM*→                                              | TIR+NPCBM    | 313 | ADL03_RS37120     | actinobacteria | Nocardia sp. NRRL S-836       | TIR domain-containing protein [Nocardia sp. NRRL S-836].          | GCF_001279525.1 |
| WP_059080926.1 | SIG+NPCBM*→                                                            | SIG+NPCBM    | 249 | AV118_RS18065     | actinobacteria | Streptomyces scabiei          | hypothetical protein [Streptomyces scabiei].                      | GCF_001485125.1 |
| WP_060884640.1 | SIG+NPCBM*→                                                            | SIG+NPCBM    | 249 | AW217_RS20820     | actinobacteria | Streptomyces                  | MULTISPECIES: hypothetical protein [Streptomyces].                | GCF_001550315.1 |
| WP_063021686.1 | TIR+NPCBM*→                                                            | TIR+NPCBM    | 365 | NNI01S_RS20285    | actinobacteria | Nocardia niwae                | TIR domain-containing protein [Nocardia niwae].                   | GCF_001613465.1 |
| WP_063271509.1 | TIR+NPCBM*→                                                            | TIR+NPCBM    | 311 | AVR91_RS32695     | actinobacteria | Amycolatopsis keratiniphila   | TIR domain-containing protein [Amycolatopsis keratiniphila].      | GCF_001620365.2 |
| WP_065912847.1 | TIR+NPCBM*→  <-SIGMA-HTH<-?<-?  TIR+APATPase+TPR→ Pkinase+PASTA+NPCBM→ | TIR+NPCBM    | 311 | SD37_RS16400      | actinobacteria | Amycolatopsis orientalis      | TIR domain-containing protein [Amycolatopsis orientalis].         | GCF_000943515.2 |
| WP_065917610.1 | <-TIR+SWACOS  TIR+NPCBM*→                                              | TIR+NPCBM    | 313 | BBK82_RS27620     | actinobacteria | Lentzea guizhouensis          | TIR domain-containing protein [Lentzea guizhouensis].             | GCF_001701025.1 |
| WP_067504284.1 | TIR+NPCBM*→ DUF1707-SHOCT-bihelical+TM+NPCBM→                          | TIR+NPCBM    | 354 | DFR74_RS01985     | actinobacteria | Nocardia puris                | TIR domain-containing protein [Nocardia puris].                   | GCF_001613185.1 |
| WP_067576374.1 | TIR+NPCBM*→                                                            | TIR+NPCBM    | 317 | BM362_RS43075     | actinobacteria | Amycolatopsis                 | MULTISPECIES: TIR domain-containing protein [Amycolatopsis].      | GCF_900115345.1 |
| WP_072027654.1 | TIR+NPCBM*→                                                            | TIR+NPCBM    | 311 | BS330_RS33980     | actinobacteria | Amycolatopsis keratiniphila   | TIR domain-containing protein [Amycolatopsis keratiniphila].      | GCF_900105855.1 |
| WP_072480469.1 | TIR+NPCBM*→                                                            | TIR+NPCBM    | 313 | BT341_RS36010     | actinobacteria | Amycolatopsis australiensis   | TIR domain-containing protein [Amycolatopsis australiensis].      | GCF_900119165.1 |
| WP_073842247.1 | TIR+NPCBM*→                                                            | TIR+NPCBM    | 311 | AMK34_RS00365     | actinobacteria | Amycolatopsis sp. CB00013     | TIR domain-containing protein [Amycolatopsis sp. CB00013].        | GCF_001905755.1 |
| WP_075973728.1 | TIR+NPCBM*→                                                            | TIR+NPCBM    | 321 | BJP25_RS05870     | actinobacteria | Actinokineospora bangkokensis | TIR domain-containing protein [Actinokineospora bangkokensis].    | GCF_001940455.1 |
| WP_076994098.1 | TIR+NPCBM*→                                                            | TIR+NPCBM    | 319 | ALI144C_RS48690   | actinobacteria | Actinosynnema sp. ALI-1.44    | TIR domain-containing protein [Actinosynnema sp. ALI-1.44].       | GCF_001984155.1 |
| WP_081378834.1 | TM+NPCBM*→                                                             | TM+NPCBM     | 241 | BKH12_RS13860     | actinobacteria | Actinomyces naeslundii        | NPCBM/NEW2 domain-containing protein [Actinomyces naeslundii].    | GCF_001937595.1 |
| WP_083302693.1 | SIG+NPCBM*→                                                            | SIG+NPCBM    | 248 | GA0070563_RS15405 | actinobacteria | Micromonospora carbonacea     | NPCBM/NEW2 domain-containing protein [Micromonospora carbonacea]. | GCF_900091535.1 |

| acc            | operon                                                                  | architecture | len | gen.name      | taxend         | species                         | define                                                              | gca             |
|----------------|-------------------------------------------------------------------------|--------------|-----|---------------|----------------|---------------------------------|---------------------------------------------------------------------|-----------------|
| WP_083946854.1 | SIG+NPCM→*                                                              | *            | 237 | -             | actinobacteria | Actinomadura latina             | NPCBM/NEW2 domain-containing protein [Actinomadura latina].         | -               |
| WP_084466056.1 | TIR+NPCBM*→                                                             | TIR+NPCBM    | 351 | NC5_RS29410   | actinobacteria | Nocardia salmonicida            | TIR domain-containing protein [Nocardia salmonicida].               | GCF_001612865.1 |
| WP_084468436.1 | TIR+NPCM→*                                                              | *            | 386 | -             | actinobacteria | Actinokineospora inagensis      | TIR domain-containing protein [Actinokineospora inagensis].         | -               |
| WP_084476879.1 | TIR+NPCM→*                                                              | *            | 418 | -             | actinobacteria | Actinokineospora enzanensis     | TIR domain-containing protein [Actinokineospora enzanensis].        | -               |
| WP_084477357.1 | TIR+NPCBM*→                                                             | TIR+NPCBM    | 368 | C503_RS45000  | actinobacteria | Actinokineospora enzanensis     | TIR domain-containing protein [Actinokineospora enzanensis].        | GCF_000374445.1 |
| WP_086672996.1 | TIR+NPCBM*→  <-?<-?  DeoR→                                              | TIR+NPCBM    | 324 | CCN36_RS07390 | actinobacteria | Amycolatopsis pretoriensis      | NPCBM/NEW2 domain-containing protein [Amycolatopsis pretoriensis].  | GCF_900107925.1 |
| WP_086838076.1 | TIR+NPCBM*→  <-Pkinase+PASTA+NPCBM                                      | TIR+NPCBM    | 334 | CCN39_RS01920 | actinobacteria | Amycolatopsis kentuckyensis     | TIR domain-containing protein [Amycolatopsis kentuckyensis].        | GCF_002155975.1 |
| WP_086857686.1 | TIR+NPCBM*→  <-?  ?→ ABhydrolase→                                       | TIR+NPCBM    | 324 | CCN50_RS10835 | actinobacteria | Amycolatopsis lexingtonensis    | TIR domain-containing protein [Amycolatopsis lexingtonensis].       | GCF_002156005.1 |
| WP_086858461.1 | HTH+APATPase+TPR→ TIR+NPCBM*→                                           | TIR+NPCBM    | 333 | CCN50_RS15120 | actinobacteria | Amycolatopsis lexingtonensis    | TIR domain-containing protein [Amycolatopsis lexingtonensis].       | GCF_002156005.1 |
| WP_089922416.1 | <-TIR<-Pkinase+PASTA+NPCBM  TIR+NPCBM*→?→  <-?<-?<-?  SIG+Phytase-like→ | TIR+NPCBM    | 400 | BMY74_RS32975 | actinobacteria | Lentzea albida                  | TIR domain-containing protein [Lentzea albida].                     | GCF_900111005.1 |
| WP_091285568.1 | TIR+NPCBM*→  <-SIGMA-HTH                                                | TIR+NPCBM    | 332 | BLV57_RS01490 | actinobacteria | Amycolatopsis xylanica          | TIR domain-containing protein [Amycolatopsis xylanica].             | GCF_900107045.1 |
| WP_091312295.1 | TIR+NPCBM*→  <-?  DeoR→?→?→?→ TPRs+TM+TM→                               | TIR+NPCBM    | 324 | BLW76_RS27015 | actinobacteria | Amycolatopsis tolypomycina      | TIR domain-containing protein [Amycolatopsis tolypomycina].         | GCF_900105945.1 |
| WP_091377330.1 | <-AAA?<-?  TIR+NPCBM*→                                                  | TIR+NPCBM    | 406 | BLR56_RS14460 | actinobacteria | Alloactinosynnema album         | TIR domain-containing protein [Alloactinosynnema album].            | GCF_900099755.1 |
| WP_091509601.1 | TIR+NPCBM*→                                                             | TIR+NPCBM    | 307 | BMZ92_RS19550 | actinobacteria | Amycolatopsis sacchari          | TIR domain-containing protein [Amycolatopsis sacchari].             | GCF_900114035.1 |
| WP_091597157.1 | TIR+NPCM→*                                                              | *            | 338 | -             | actinobacteria | Amycolatopsis lurida            | TIR domain-containing protein [Amycolatopsis lurida].               | -               |
| WP_092774771.1 | <-AAA?<-?<-ParA+TIR+pIdsmall1<-TIR  TIR+NPCBM*→                         | TIR+NPCBM    | 370 | BMY07_RS02730 | actinobacteria | Actinokineospora terrae         | TIR domain-containing protein [Actinokineospora terrae].            | GCF_900111175.1 |
| WP_096492220.1 | TIR+NPCBM*→                                                             | TIR+NPCBM    | 321 | CNX65_RS08180 | actinobacteria | Actinosynnema pretiosum         | TIR domain-containing protein [Actinosynnema pretiosum].            | GCF_002354875.1 |
| WP_101607037.1 | TIR+NPCBM*→  <-SIGMA-HTH                                                | TIR+NPCBM    | 311 | BKN51_RS08135 | actinobacteria | Amycolatopsis sp. BJA-103       | TIR domain-containing protein [Amycolatopsis sp. BJA-103].          | GCF_002849735.1 |
| WP_103339180.1 | TIR+NPCBM*→  <-?  DeoR→                                                 | TIR+NPCBM    | 324 | C2L58_RS20385 | actinobacteria | Amycolatopsis sp. CA-126428     | TIR domain-containing protein [Amycolatopsis sp. CA-126428].        | GCF_002904335.1 |
| WP_103349374.1 | TIR+NPCBM*→  <-Pkinase+PASTA+NPCBM                                      | TIR+NPCBM    | 330 | C2L59_RS10725 | actinobacteria | Amycolatopsis sp. CA-128772     | TIR domain-containing protein [Amycolatopsis sp. CA-128772].        | GCF_002904295.1 |
| WP_103354377.1 | TIR+NPCBM*→  <-?  ?→ HTH+APATPase+TPR→  <-?  ?→ ABhydrolase→            | TIR+NPCBM    | 324 | C2L59_RS37045 | actinobacteria | Amycolatopsis sp. CA-128772     | NPCBM/NEW2 domain-containing protein [Amycolatopsis sp. CA-128772]. | GCF_002904295.1 |
| WP_116202815.1 | HTH+APATPase+TPR→ TIR+NPCBM*→                                           | TIR+NPCBM    | 332 | D0D37_RS23965 | actinobacteria | Amycolatopsis circi             | TIR domain-containing protein [Amycolatopsis circi].                | GCF_003385235.1 |
| WP_116206775.1 | <-ParA+TIR+pIdsmall1<-TIR  TIR+NPCBM*→                                  | TIR+NPCBM    | 302 | D0D37_RS45550 | actinobacteria | Amycolatopsis circi             | TIR domain-containing protein, partial [Amycolatopsis circi].       | GCF_003385235.1 |
| WP_118945693.1 | TIR+NPCBM*→                                                             | TIR+NPCBM    | 321 | APASM_RS08545 | actinobacteria | Actinosynnema pretiosum         | TIR domain-containing protein [Actinosynnema pretiosum].            | GCF_003516205.1 |
| WP_121393603.1 | TIR+NPCM→*                                                              | *            | 374 | -             | actinobacteria | Actinokineospora cianjurenensis | TIR domain-containing protein [Actinokineospora cianjurenensis].    | -               |
| WP_121434386.1 | SIG+NPCBM*→  <-MACRODOMAIN                                              | SIG+NPCBM    | 236 | BZB76_2536    | actinobacteria | Actinomadura pelletieri         | NPCBM/NEW2 domain-containing protein [Actinomadura pelletieri].     | -               |

| acc            | operon                                                                              | architecture | len | gen.name       | taxend         | species                        | define                                                                    | gca             |
|----------------|-------------------------------------------------------------------------------------|--------------|-----|----------------|----------------|--------------------------------|---------------------------------------------------------------------------|-----------------|
| WP_125313210.1 | HTH+APATPase+TPR→ TIR+NPCBM*→                                                       | TIR+NPCBM    | 333 | EIY87_RS30160  | actinobacteria | Amycolatopsis sp. GLM-1        | TIR domain-containing protein [Amycolatopsis sp. GLM-1].                  | GCF_003937945.1 |
| WP_125687207.1 | TIR+NPCBM*→                                                                         | TIR+NPCBM    | 311 | DMC61_RS04995  | actinobacteria | Amycolatopsis sp. WAC 04169    | TIR domain-containing protein [Amycolatopsis sp. WAC 04169].              | GCF_003947535.1 |
| WP_132047124.1 | AbiJ-NTD3+HEPN→  <?<-AbiJ-NTD2<-?  SIG+NPCBM*→                                      | SIG+NPCBM    | 233 | EDF27_RS02545  | actinobacteria | Curtobacterium sp. PhB136      | NPCBM/NEW2 domain-containing protein [Curtobacterium sp. PhB136].         | GCF_004346855.1 |
| WP_132121932.1 | TIR+NPCBM*→  <-TIR+APATPase+TPR<-HTH+APATPase+TPR                                   | TIR+NPCBM    | 320 | EV192_RS31600  | actinobacteria | Actinocrispum wychmicini       | TIR domain-containing protein [Actinocrispum wychmicini].                 | GCF_004345645.1 |
| WP_132396057.1 | SIG+NPCBM*→                                                                         | SIG+NPCBM    | 248 | E1258_RS01390  | actinobacteria | Micromonospora sp. KC207       | hypothetical protein [Micromonospora sp. KC207].                          | GCF_004348615.1 |
| WP_134666532.1 | TIR+NPCM→*                                                                          | *            | 401 | -              | actinobacteria | Amycolatopsis sp. CFH S0078    | TIR domain-containing protein [Amycolatopsis sp. CFH S0078].              | -               |
| WP_134731967.1 | TIR+NPCM→*                                                                          | *            | 401 | -              | actinobacteria | Amycolatopsis sp. CFH S0261    | TIR domain-containing protein [Amycolatopsis sp. CFH S0261].              | -               |
| WP_134736094.1 | TIR+NPCM→*                                                                          | *            | 401 | -              | actinobacteria | Amycolatopsis sp. CFH S0740    | TIR domain-containing protein [Amycolatopsis sp. CFH S0740].              | -               |
| WP_139190910.1 | <-AAA?<-?  TIR+NPCBM*→                                                              | TIR+NPCBM    | 428 | BLS56_RS22670  | actinobacteria | Alloactinosynnema iranicum     | TIR domain-containing protein [Alloactinosynnema iranicum].               | GCF_900101685.1 |
| WP_145934223.1 | <-AAA?<-?<-ParA+TIR+pIdsmall1<-TIR  TIR+NPCBM*→                                     | TIR+NPCBM    | 318 | FNH07_RS09925  | actinobacteria | Amycolatopsis bartoniae        | TIR domain-containing protein [Amycolatopsis bartoniae].                  | GCF_007713755.1 |
| WP_146108413.1 | TIR+NPCBM*→                                                                         | TIR+NPCBM    | 324 | CLV40_RS36380  | actinobacteria | Actinokineospora auranticolor  | TIR domain-containing protein [Actinokineospora auranticolor].            | GCF_002934265.1 |
| WP_153029663.1 | TIR+NPCBM*→                                                                         | TIR+NPCBM    | 314 | YIM_RS07645    | actinobacteria | Amycolatopsis sp. YIM 10       | TIR domain-containing protein [Amycolatopsis sp. YIM 10].                 | GCF_009429145.1 |
| WP_153030365.1 | <-AAA?<-?<-ParA+TIR+pIdsmall1<-TIR  TIR+NPCBM*→  <-?<-?<-AAA<-TIR+Pkinase  SIG+TIR→ | TIR+NPCBM    | 341 | YIM_RS11635    | actinobacteria | Amycolatopsis sp. YIM 10       | TIR domain-containing protein [Amycolatopsis sp. YIM 10].                 | GCF_009429145.1 |
| WP_153804578.1 | <-HTH+APATPase+TPR  ?→?→ TPR+TM+TM→ TIR+NPCBM*→ DUF1707-SHOCT-bihelical+TM+NPCBM→   | TIR+NPCBM    | 348 | GFY24_RS09395  | actinobacteria | Nocardia sp. SYP-A9097         | TIR domain-containing protein [Nocardia sp. SYP-A9097].                   | GCF_009649815.1 |
| WP_154760338.1 | <-AAA?<-?<-ParA+TIR+pIdsmall1<-TIR  TIR+NPCBM*→                                     | TIR+NPCBM    | 380 | GKO32_30380    | actinobacteria | Amycolatopsis pithecelloba     | TIR domain-containing protein [Amycolatopsis pithecelloba].               | -               |
| WP_155543819.1 | TIR+NPCBM*→  <-?<-?<-?  DeoR→                                                       | TIR+NPCBM    | 324 | AA23TX_RS18915 | actinobacteria | Amycolatopsis sp. A23          | TIR domain-containing protein [Amycolatopsis sp. A23].                    | GCF_902497555.1 |
| WP_156077140.1 | HTH+APATPase+TPR→?→ TIR+SWACOS→?→ TIR+NPCBM*→                                       | TIR+NPCBM    | 345 | OQ02_RS41080   | actinobacteria | Saccharothrix sp. NRRL B-16314 | TIR domain-containing protein [Saccharothrix sp. NRRL B-16314].           | GCF_000716595.1 |
| WP_156753285.1 | <-AAA?<-?<-ParA+TIR+pIdsmall1<-TIR  TIR+NPCBM*→                                     | TIR+NPCBM    | 409 | GCL84_RS00345  | actinobacteria | Actinokineospora sp. TRM65233  | TIR domain-containing protein [Actinokineospora sp. TRM65233].            | GCF_009745975.1 |
| WP_157767649.1 | SIG+TIR+APATPase+TPR+TPR+TPR→?→ TIR+NPCBM*→                                         | TIR+NPCBM    | 338 | CNX65_RS14535  | actinobacteria | Actinosynnema pretiosum        | TIR domain-containing protein [Actinosynnema pretiosum].                  | GCF_002354875.1 |
| WP_158005434.1 | TIR+NPCBM*→  <-SIGMA-HTH                                                            | TIR+NPCBM    | 311 | BLW75_RS08360  | actinobacteria | Amycolatopsis lurida           | TIR domain-containing protein [Amycolatopsis lurida].                     | GCF_900105055.1 |
| WP_158104517.1 | TIR+NPCBM*→  <-?  DeoR→?→?→?→ TPRs+TM+TM→                                           | TIR+NPCBM    | 323 | CCN39_RS17180  | actinobacteria | Amycolatopsis kentuckyensis    | TIR domain-containing protein [Amycolatopsis kentuckyensis].              | GCF_002155975.1 |
| WP_158242545.1 | TIR+NPCBM*→                                                                         | TIR+NPCBM    | 322 | ATK30_RS34520  | actinobacteria | Amycolatopsis niigatensis      | TIR domain-containing protein [Amycolatopsis niigatensis].                | GCF_002846615.1 |
| WP_158632605.1 | TIR+NPCBM*→  <-SIGMA-HTH                                                            | TIR+NPCBM    | 311 | DL990_RS12775  | actinobacteria | unclassified Amycolatopsis     | MULTISPECIES: TIR domain-containing protein [unclassified Amycolatopsis]. | GCF_003947325.1 |
| WP_158633124.1 | TIR+NPCBM*→  <-SIGMA-HTH                                                            | TIR+NPCBM    | 311 | DMH03_RS26290  | actinobacteria | Amycolatopsis sp. WAC 01376    | TIR domain-containing protein [Amycolatopsis sp. WAC 01376].              | GCF_003947415.1 |
| WP_158633195.1 | TIR+NPCBM*→  <-SIGMA-HTH                                                            | TIR+NPCBM    | 311 | DMH01_RS07200  | actinobacteria | Amycolatopsis sp. WAC 04182    | TIR domain-containing protein [Amycolatopsis sp. WAC 04182].              | GCF_003947465.1 |

| acc            | operon                                                                                        | architecture | len | gen.name      | taxend         | species                         | define                                                            | gca             |
|----------------|-----------------------------------------------------------------------------------------------|--------------|-----|---------------|----------------|---------------------------------|-------------------------------------------------------------------|-----------------|
| WP_158634321.1 | TIR+NPCBM*→                                                                                   | TIR+NPCBM    | 311 | DMC64_RS39520 | actinobacteria | Amycolatopsis sp. WAC 04197     | TIR domain-containing protein [Amycolatopsis sp. WAC 04197].      | GCF_003947475.1 |
| WP_158641456.1 | TIR+NPCBM*→                                                                                   | TIR+NPCBM    | 323 | EIY87_RS41990 | actinobacteria | Amycolatopsis sp. GLM-1         | TIR domain-containing protein [Amycolatopsis sp. GLM-1].          | GCF_003937945.1 |
| WP_158660795.1 | <-SIG+NPCBM<-?  PNPase+bDLD3→ bDLD3+NPCBM*→ DUF1707-SHOCT-bihelical+TM+NPCBM→  <-LD-peptidase | bDLD3+NPCBM  | 227 | NS506_RS18405 | actinobacteria | Nocardia seriolae               | NPCBM/NEW2 domain-containing protein [Nocardia seriolae].         | GCF_001865855.1 |
| WP_160694349.1 | TIR+NPCBM*→                                                                                   | TIR+NPCBM    | 333 | GTY80_RS02520 | actinobacteria | Amycolatopsis sp. SID8362       | NPCBM/NEW2 domain-containing protein [Amycolatopsis sp. SID8362]. | GCF_010550475.1 |
| WP_160695878.1 | <-ParA+TIR+pIdsmall1<-TIR  TIR+NPCBM*→                                                        | TIR+NPCBM    | 323 | GTY80_RS10210 | actinobacteria | Amycolatopsis sp. SID8362       | TIR domain-containing protein [Amycolatopsis sp. SID8362].        | GCF_010550475.1 |
| WP_162945306.1 | HTH+APATPase+TPR→?→ TIR+SWACOS→ SIG+TIR+APATPase+TPR+TPR+TPR→?→ TIR+NPCBM*→                   | TIR+NPCBM    | 334 | APASM_RS15040 | actinobacteria | Actinosynnema pretiosum         | TIR domain-containing protein [Actinosynnema pretiosum].          | GCF_003516205.1 |
| WP_166054137.1 | TIR+NPCBM*→                                                                                   | TIR+NPCBM    | 358 | G7043_RS41275 | actinobacteria | Lentzea sp. NEAU-D13            | TIR domain-containing protein [Lentzea sp. NEAU-D13].             | GCF_011067745.1 |
| WP_166459784.1 | TIR+NPCBM*→                                                                                   | TIR+NPCBM    | 312 | GKO32_RS30390 | actinobacteria | Amycolatopsis pithecelloba      | TIR domain-containing protein [Amycolatopsis pithecelloba].       | GCF_009707865.1 |
| WP_166658167.1 | <-AAA?<-?  TIR+NPCBM*→                                                                        | TIR+NPCBM    | 333 | C8E96_RS30065 | actinobacteria | Alloactinosynnema album         | TIR domain-containing protein [Alloactinosynnema album].          | GCF_004362515.1 |
| WP_167754290.1 | TIR+NPCBM*→                                                                                   | TIR+NPCBM    | 317 | EIZ44_RS27085 | actinobacteria | Amycolatopsis sp. CFH S0261     | TIR domain-containing protein [Amycolatopsis sp. CFH S0261].      | GCF_004522235.1 |
| WP_167756625.1 | TIR+NPCBM*→                                                                                   | TIR+NPCBM    | 317 | EIZ45_RS33520 | actinobacteria | Amycolatopsis sp. CFH S0740     | TIR domain-containing protein [Amycolatopsis sp. CFH S0740].      | GCF_004522315.1 |
| WP_167757025.1 | TIR+NPCBM*→                                                                                   | TIR+NPCBM    | 317 | EIZ40_RS28840 | actinobacteria | Amycolatopsis sp. CFH S0078     | TIR domain-containing protein [Amycolatopsis sp. CFH S0078].      | GCF_004522265.1 |
| WP_168444669.1 | GDSSL+YEATS→  <-?  ?→ CASPASE→ HTH+APATPase+TPR→?→ TIR+APATPase+TPR→ SIG+NPCBM*→              | SIG+NPCBM    | 234 | AL2_RS24450   | actinobacteria | Actinomadura latina             | NPCBM/NEW2 domain-containing protein [Actinomadura latina].       | GCF_001552195.1 |
| WP_170180607.1 | SIG+NPCBM*→  <-MACRODOMAIN                                                                    | SIG+NPCBM    | 213 | BZB76_RS12335 | actinobacteria | Actinomadura pelletieri         | NPCBM/NEW2 domain-containing protein [Actinomadura pelletieri].   | GCF_003634705.1 |
| WP_170224594.1 | TIR+NPCBM*→                                                                                   | TIR+NPCBM    | 316 | CLV68_RS26440 | actinobacteria | Actinokineospora cianjurenensis | TIR domain-containing protein [Actinokineospora cianjurenensis].  | GCF_003663795.1 |



| acc        | operon                                                                                                                                                        | architecture       | len  | gen.name      | taxend             | species                             | define                                                                          | gca             |
|------------|---------------------------------------------------------------------------------------------------------------------------------------------------------------|--------------------|------|---------------|--------------------|-------------------------------------|---------------------------------------------------------------------------------|-----------------|
| EXI70483.1 | EAD8+nSTAND1+FGS*→                                                                                                                                            | EAD8+nSTAND1+FGS   | 824  | pkn1_6        | betaproteobacteria | Candidatus Accumulibacter sp. SK-11 | Serine/threonine-protein kinase pkn1 [Candidatus Accumulibacter sp. SK-11].     | GCA_000584995.1 |
| EXI75672.1 | SWC3→  <-?<-?  ?→ FGS*→                                                                                                                                       | FGS                | 248  | pkn1_2        | betaproteobacteria | Candidatus Accumulibacter sp. SK-11 | Serine/threonine-protein kinase pkn1 [Candidatus Accumulibacter sp. SK-11].     | GCA_000584995.1 |
| EXI76855.1 | SIG+TM+TM+TM+TM+TM+TM+TM+TM→  <-Patatin  ?→  <-?  ?→  <-?  nSTAND1+FGS*→  <-fvmYukD1-Nterm                                                                    | nSTAND1+FGS        | 765  | pkn1_1        | betaproteobacteria | Candidatus Accumulibacter sp. SK-11 | Serine/threonine-protein kinase pkn1 [Candidatus Accumulibacter sp. SK-11].     | GCA_000584995.1 |
| EXI82219.1 | <-CNMP+CRP-HTH  FAD-NAD-dep-oxidoreductase→?→  <-?<-?<-?<-ABhydrolase  nSTAND1+FGS*→  <-?<-SIG+CACHE+TM+PAS+PAS+GGDEF+EAL<-?  ?→?→<br>ABC-ATPase→             | nSTAND1+FGS        | 784  | pkn1_4        | betaproteobacteria | Candidatus Accumulibacter sp. BA-92 | Serine/threonine-protein kinase pkn1 [Candidatus Accumulibacter sp. BA-92].     | GCA_000585055.1 |
| EXI89946.1 | nSTAND1→ nSTAND1+FGS*→                                                                                                                                        | nSTAND1+FGS        | 409  | pkn1          | betaproteobacteria | Candidatus Accumulibacter sp. BA-94 | Serine/threonine-protein kinase pkn1 [Candidatus Accumulibacter sp. BA-94].     | GCA_000585095.1 |
| EXI90315.1 | <-CNMP+CRP-HTH  FAD-NAD-dep-oxidoreductase→?→  <-?<-?<-?<-ABhydrolase  TIR+nSTAND1+FGS*→  <-ABHYDROLASE<-SIG+CACHE+TM+PAS+PAS+GGDEF+EAL<-?  ?→<br>ABC-ATPase→ | TIR+nSTAND1+FGS    | 778  | pkn1_1        | betaproteobacteria | Candidatus Accumulibacter sp. BA-93 | Serine/threonine-protein kinase pkn1 [Candidatus Accumulibacter sp. BA-93].     | GCA_000585075.1 |
| GAK51596.1 | FGS*→ Four-helical-protein→                                                                                                                                   | FGS                | 347  | U14_02841     | bacteria           | Candidatus Moduliflexus flocculans  | hypothetical protein U14_02841 [Candidatus Moduliflexus flocculans].            | GCA_000739515.1 |
| GAK55793.1 | SIG+TM+TM+TM+TM+TM+TM+TM+TM+TM→?→ ABC-ATPase→ ABC-ATPase→ NACHT+FGS*→                                                                                         | NACHT+FGS          | 1007 | U27_02752     | bacteria           | Candidatus Vecturithrix granuli     | hypothetical protein U27_02752 [Candidatus Vecturithrix granuli].               | GCA_000739535.1 |
| GAK57663.1 | TIR+NACHT+FGS*→ MED26C→?→  <-ABC-ATPase                                                                                                                       | TIR+NACHT+FGS      | 1091 | U27_04630     | bacteria           | Candidatus Vecturithrix granuli     | hypothetical protein U27_04630 [Candidatus Vecturithrix granuli].               | GCA_000739535.1 |
| GAK60834.1 | SIG+TM+TM+TM+TM+TM→?→?→ REase→ TIR+NACHT+FGS*→  <-?<-?<-?<-?<-?<-?  GNTR-HTH→                                                                                 | TIR+NACHT+FGS      | 1098 | U27_00732     | bacteria           | Candidatus Vecturithrix granuli     | signal transduction protein [Candidatus Vecturithrix granuli].                  | GCA_000739535.1 |
| GDY22761.1 | NACHT+FGS*→                                                                                                                                                   | NACHT+FGS          | 859  | LBMAG56_41080 | verrucomicrobia    | Verrucomicrobia bacterium           | hypothetical protein LBMAG56_41080 [Verrucomicrobia bacterium].                 | -               |
| HAW49373.1 | REase+NACHT+FGS*→                                                                                                                                             | REase+NACHT+FGS    | 821  | DCX16_00245   | bacteria           | bacterium                           | TPA: hypothetical protein DCX16_00245 [bacterium].                              | GCA_003498085.1 |
| HAY28136.1 | nSTAND1-C+FGS*→  <-RVT                                                                                                                                        | nSTAND1-C+FGS      | 564  | DCY47_11690   | betaproteobacteria | Candidatus Accumulibacter sp.       | TPA: hypothetical protein DCY47_11690, partial [Candidatus Accumulibacter sp.]. | GCA_003487685.1 |
| HBW50062.1 | BACTERIALFRINGE→ BetaPropeller→  <-?  ?→?→ NACHT+FGS*→                                                                                                        | NACHT+FGS          | 961  | DEF47_09155   | chloroflexi        | Herpetosiphon sp.                   | TPA: hypothetical protein DEF47_09155 [Herpetosiphon sp.].                      | GCA_003512625.1 |
| HBY06356.1 | <-ABC-ATPase<-LRP-HTH  SIG+TM+TM+TM→?→?→?→ KAP-NTPase→ SIG+KAP-NTPase+FGS*→ KAP-NTPase→                                                                       | SIG+KAP-NTPase+FGS | 655  | DEH22_00650   | chloroflexi        | Chloroflexi bacterium               | TPA: hypothetical protein DEH22_00650 [Chloroflexi bacterium].                  | GCA_003512075.1 |
| HBY99326.1 | FGS*→                                                                                                                                                         | FGS                | 244  | DEP84_36210   | chloroflexi        | Chloroflexi bacterium               | TPA: hypothetical protein DEP84_36210 [Chloroflexi bacterium].                  | GCA_003520455.1 |
| HCB49403.1 | NACHT+FGS*→                                                                                                                                                   | NACHT+FGS          | 568  | DEP47_07750   | chloroflexi        | Chloroflexi bacterium               | TPA: hypothetical protein DEP47_07750 [Chloroflexi bacterium].                  | GCA_003519205.1 |



| acc        | operon                                                                                                   | architecture    | len  | gen.name    | taxend              | species                                 | define                                                                                   | gca |
|------------|----------------------------------------------------------------------------------------------------------|-----------------|------|-------------|---------------------|-----------------------------------------|------------------------------------------------------------------------------------------|-----|
| HEU31392.1 | NACHT+FGS*→ Four-helical-protein→ RVT→                                                                   | NACHT+FGS       | 452  | ENQ60_07770 | bacteria            | bacterium                               | TPA: formylglycine-generating enzyme family protein [bacterium].                         | -   |
| HEY85774.1 | CASPASE+FGS*→ RVT→ Four-helical-protein→                                                                 | CASPASE+FGS     | 599  | G4N96_11770 | chloroflexi         | Chloroflexi bacterium                   | TPA: SUMF1/EgtB/PvdO family nonheme iron enzyme [Chloroflexi bacterium].                 | -   |
| HFG28526.1 | NACHT→ NACHT+FGS*→ SIG+SWC3→ RVT→  <-?  ?→?→?→ SIGMA-HTH→                                                | NACHT+FGS       | 437  | ENS73_16885 | verrucomicrobia     | Verrucomicrobia subdivision 3 bacterium | TPA: hypothetical protein ENS73_16885 [Verrucomicrobia subdivision 3 bacterium].         | -   |
| HFI29792.1 | NACHT+FGS*→ FURR-HTH→                                                                                    | NACHT+FGS       | 761  | ENS47_13485 | chloroflexi         | Chloroflexi bacterium                   | TPA: NACHT domain-containing protein, partial [Chloroflexi bacterium].                   | -   |
| HGH57499.1 | KAP-NTPase+FGS*→                                                                                         | KAP-NTPase+FGS  | 750  | ENV55_04065 | chloroflexi         | Chloroflexi bacterium                   | TPA: hypothetical protein ENV55_04065 [Chloroflexi bacterium].                           | -   |
| HGH59410.1 | FGS*→                                                                                                    | FGS             | 299  | ENV55_14010 | chloroflexi         | Chloroflexi bacterium                   | TPA: formylglycine-generating enzyme family protein [Chloroflexi bacterium].             | -   |
| HGV26478.1 | NACHT+FGS*→ SIG+SWC3→?→?→  <-?<-?<-SIG+PTSIIB-sorb                                                       | NACHT+FGS       | 1042 | ENS93_08620 | chloroflexi         | Chloroflexi bacterium                   | TPA: NACHT domain-containing protein [Chloroflexi bacterium].                            | -   |
| HGV28164.1 | bDLD1+NACHT+FGS→?→?→ KAP-NTPase+FGS*→?→?→?→?→ SIG+TPR+TPR+TPR→                                           | KAP-NTPase+FGS  | 742  | ENS93_17300 | chloroflexi         | Chloroflexi bacterium                   | TPA: hypothetical protein ENS93_17300 [Chloroflexi bacterium].                           | -   |
| HGY49632.1 | EAD7+TIR+FGS*→                                                                                           | EAD7+TIR+FGS    | 580  | ENR34_13005 | chloroflexi         | Anaerolineae bacterium                  | TPA: TIR domain-containing protein [Anaerolineae bacterium].                             | -   |
| HGY52758.1 | FGS*→                                                                                                    | FGS             | 228  | ENR34_29005 | chloroflexi         | Anaerolineae bacterium                  | TPA: formylglycine-generating enzyme family protein [Anaerolineae bacterium].            | -   |
| HHF60465.1 | ZNR+NACHT+FGS→ <i>CASPASE</i> → <i>NACHT</i> → <i>FGS</i> →                                              | ZNR+NACHT+FGS   | 925  | ENL51_05545 | acidobacteria       | Candidatus Solibacter sp.               | TPA: NACHT domain-containing protein [Candidatus Solibacter sp.].                        | -   |
| HHF60468.1 | FGS*→                                                                                                    | FGS             | 344  | ENL51_05560 | acidobacteria       | Candidatus Solibacter sp.               | TPA: hypothetical protein ENL51_05560 [Candidatus Solibacter sp.].                       | -   |
| HHH41247.1 | NACHT+FGS*→ SIG+SWC3→                                                                                    | NACHT+FGS       | 1027 | ENK56_04500 | chloroflexi         | Chloroflexi bacterium                   | TPA: NACHT domain-containing protein [Chloroflexi bacterium].                            | -   |
| HHR86634.1 | NACHT+FGS*→                                                                                              | NACHT+FGS       | 996  | ENL64_01430 | chloroflexi         | Anaerolineae bacterium                  | TPA: NACHT domain-containing protein [Anaerolineae bacterium].                           | -   |
| HHW76671.1 | SIG+TM+TM+TM+TM+TM+TM+TM+TM+TM+TM+TM→ ABC-ATPase→ TIR+nSTAND1+FGS*→  <-MED24<-?  FGS→ REase→ RVT→  <-FGS | TIR+nSTAND1+FGS | 754  | GX399_06480 | gammaproteobacteria | Xanthomonadaceae bacterium              | TPA: SUMF1/EgtB/PvdO family nonheme iron enzyme [Xanthomonadaceae bacterium].            | -   |
| HHW77288.1 | NACHT+FGS*→                                                                                              | NACHT+FGS       | 827  | GX399_09735 | gammaproteobacteria | Xanthomonadaceae bacterium              | TPA: SUMF1/EgtB/PvdO family nonheme iron enzyme [Xanthomonadaceae bacterium].            | -   |
| HHZ92662.1 | FGS*→                                                                                                    | FGS             | 236  | EYN65_19595 | bacteria            | Candidatus Poribacteria bacterium       | TPA: formylglycine-generating enzyme family protein [Candidatus Poribacteria bacterium]. | -   |

| acc          | operon                                                                               | architecture                       | len  | gen.name    | taxend              | species                           | define                                                                            | gca |
|--------------|--------------------------------------------------------------------------------------|------------------------------------|------|-------------|---------------------|-----------------------------------|-----------------------------------------------------------------------------------|-----|
| HIC91070.1   | FGS*→                                                                                | FGS                                | 259  | EYP21_03210 | deltaproteobacteria | Syntrophaceae bacterium           | TPA: hypothetical protein EYP21_03210 [Syntrophaceae bacterium].                  | -   |
| HID19936.1   | NACHT+FGS*→                                                                          | NACHT+FGS                          | 740  | EYP28_03210 | eurycarchacota      | Methanophagales archaeon          | TPA: NACHT domain-containing protein [Methanophagales archaeon].                  | -   |
| HID51452.1   | <-PIN<-?  SIG+KAP-NTPase+FGS*→                                                       | SIG+KAP-NTPase+FGS                 | 847  | EYP41_05380 | chloroflexi         | Anaerolineae bacterium            | TPA: hypothetical protein EYP41_05380 [Anaerolineae bacterium].                   | -   |
| HID51956.1   | NACHT+FGS*→                                                                          | NACHT+FGS                          | 383  | EYP41_07970 | chloroflexi         | Anaerolineae bacterium            | TPA: hypothetical protein EYP41_07970, partial [Anaerolineae bacterium].          | -   |
| HID52846.1   | EAD7+NACHT+FGS*→                                                                     | EAD7+NACHT+FGS                     | 964  | EYP41_12530 | chloroflexi         | Anaerolineae bacterium            | TPA: NACHT domain-containing protein [Anaerolineae bacterium].                    | -   |
| HID54715.1   | FGS→?→ NACHT+FGS*→                                                                   | NACHT+FGS                          | 985  | EYP41_22100 | chloroflexi         | Anaerolineae bacterium            | TPA: NACHT domain-containing protein, partial [Anaerolineae bacterium].           | -   |
| HIE28389.1   | SIG+Trypsin+PDZ+PDZ→ SIG+FGS*→                                                       | SIG+FGS                            | 524  | EYP66_14005 | bacteria            | Candidatus Poribacteria bacterium | TPA: PEGA domain-containing protein [Candidatus Poribacteria bacterium].          | -   |
| HIE38682.1   | KAP-NTPase+FGS*→                                                                     | KAP-NTPase+FGS                     | 769  | EYP77_06385 | chloroflexi         | Anaerolineae bacterium            | TPA: hypothetical protein EYP77_06385 [Anaerolineae bacterium].                   | -   |
| KAA3641003.1 | TIMbarrel→?→ EAD8+Trypsin→ DADA-Ligase→?→ Cluster323_2clades→?→ EAD8+NACHT+FGS*→     | EAD8+NACHT+FGS                     | 1039 | DWQ02_01180 | bacteroidetes       | Bacteroidetes bacterium           | hypothetical protein DWQ02_01180 [Bacteroidetes bacterium].                       | -   |
| KAB2859035.1 | TIR+FGS*→                                                                            | TIR+FGS                            | 340  | F9K46_11255 | chloroflexi         | Anaerolineae bacterium            | formylglycine-generating enzyme family protein, partial [Anaerolineae bacterium]. | -   |
| KAB2893788.1 | TIR→ ParA-Soj-PloopNTPase+TIR+NACHT+FGS*→  <-?<-?  ?→  <-?<-?<-?<-SF2-DUF3427A+LPD33 | ParA-Soj-PloopNTPase+TIR+NACHT+FGS | 1177 | F9K28_07510 | bacteroidetes       | Bacteroidetes bacterium           | SUMF1/EgtB/PvdO family nonheme iron enzyme [Bacteroidetes bacterium].             | -   |
| KAB2903680.1 | FGS*→?→  <-VWA+FHA<-?<-?<-ABC-ATPase<-ABC-ATPase                                     | FGS                                | 280  | F9K27_12805 | chloroflexi         | Anaerolineae bacterium            | formylglycine-generating enzyme family protein [Anaerolineae bacterium].          | -   |
| KAB2903832.1 | TIR+FGS*→                                                                            | TIR+FGS                            | 549  | F9K27_11930 | chloroflexi         | Anaerolineae bacterium            | SUMF1/EgtB/PvdO family nonheme iron enzyme [Anaerolineae bacterium].              | -   |
| KAB2904272.1 | TIR+FGS→ TIR+FGS→  <-?  ABhydrolase→                                                 | TIR+FGS                            | 523  | F9K27_09315 | chloroflexi         | Anaerolineae bacterium            | SUMF1/EgtB/PvdO family nonheme iron enzyme [Anaerolineae bacterium].              | -   |
| KAB2904273.1 | TIR+FGS*→                                                                            | TIR+FGS                            | 421  | F9K27_09320 | chloroflexi         | Anaerolineae bacterium            | SUMF1/EgtB/PvdO family nonheme iron enzyme [Anaerolineae bacterium].              | -   |
| KAB2905607.1 | DrHyd+NACHT+FGS→ NUDIX→?→?→ TIR+NACHT+FGS*→ NUDIX→                                   | TIR+NACHT+FGS                      | 902  | F9K27_02420 | chloroflexi         | Anaerolineae bacterium            | SUMF1/EgtB/PvdO family nonheme iron enzyme [Anaerolineae bacterium].              | -   |
| KAF0106945.1 | nSTAND1+Pentapeptide→ KAP-NTPase+FGS*→                                               | KAP-NTPase+FGS                     | 727  | FD146_2055  | chloroflexi         | Anaerolineaceae bacterium         | hypothetical protein FD146_2055 [Anaerolineaceae bacterium].                      | -   |

| acc        | operon                                                                                                                         | architecture      | len  | gen.name          | taxend              | species                             | define                                                                        | gca             |
|------------|--------------------------------------------------------------------------------------------------------------------------------|-------------------|------|-------------------|---------------------|-------------------------------------|-------------------------------------------------------------------------------|-----------------|
| KFB67876.1 | TIR+NACHT→ FGS*→                                                                                                               | FGS               | 279  | pkn1_17           | betaproteobacteria  | Candidatus Accumulibacter sp. SK-01 | Serine/threonine-protein kinase pkn1 [Candidatus Accumulibacter sp. SK-01].   | GCA_000584955.2 |
| KFB69575.1 | TIR→ MoxR-AAA→ MED26C→ vWA-L+FGS*→                                                                                             | vWA-L+FGS         | 808  | pkn1_4            | betaproteobacteria  | Candidatus Accumulibacter sp. SK-01 | Serine/threonine-protein kinase pkn1 [Candidatus Accumulibacter sp. SK-01].   | GCA_000584955.2 |
| KFB72199.1 | ABC-ATPase→  <-?<-?  ?→?→ SIG+FGS→  <-Four-helical-protein  RVT→  <-FGS<-MED26C<-MoxR-AAA<-TIR                                 | SIG+FGS           | 194  | egtB_1            | betaproteobacteria  | Candidatus Accumulibacter sp. BA-91 | Iron(II)-dependent oxidoreductase EgtB [Candidatus Accumulibacter sp. BA-91]. | GCA_000585035.2 |
| KFB72202.1 | FGS*→                                                                                                                          | FGS               | 826  | pkn1_7            | betaproteobacteria  | Candidatus Accumulibacter sp. BA-91 | Serine/threonine-protein kinase pkn1 [Candidatus Accumulibacter sp. BA-91].   | GCA_000585035.2 |
| KFB75278.1 | NACHT+FGS*→  <-DrHyd+NACHT+FGS<-?  ?→?→?→ MoxR-AAA→                                                                            | NACHT+FGS         | 959  | pkn1_15           | betaproteobacteria  | Candidatus Accumulibacter sp. SK-02 | Serine/threonine-protein kinase pkn1 [Candidatus Accumulibacter sp. SK-02].   | GCA_000584975.2 |
| KFB77125.1 | SIG+drhyd→ FGS*→                                                                                                               | FGS               | 250  | pkn1_7            | betaproteobacteria  | Candidatus Accumulibacter sp. SK-02 | Serine/threonine-protein kinase pkn1 [Candidatus Accumulibacter sp. SK-02].   | GCA_000584975.2 |
| KFB77789.1 | TIR→ MoxR-AAA→ MED26C→<br>vWA-L+FGS→  <-RVT  Four-helical-protein→  <-FGS<-?<-SIG+SWC3  ?→  <-nSTAND1+TM+TPR+TPR<-?  ?→ REase→ | vWA-L+FGS         | 789  | pkn1_3            | betaproteobacteria  | Candidatus Accumulibacter sp. SK-02 | Serine/threonine-protein kinase pkn1 [Candidatus Accumulibacter sp. SK-02].   | GCA_000584975.2 |
| KFB77792.1 | FGS*→                                                                                                                          | FGS               | 300  | pkn1_4            | betaproteobacteria  | Candidatus Accumulibacter sp. SK-02 | Serine/threonine-protein kinase pkn1 [Candidatus Accumulibacter sp. SK-02].   | GCA_000584975.2 |
| KKO20907.1 | NACHT+FGS*→                                                                                                                    | NACHT+FGS         | 635  | BROFUL_00364      | planctomycetes      | Candidatus Brocadia fulgida         | hypothetical protein BROFUL_00364 [Candidatus Brocadia fulgida].              | GCA_000987375.1 |
| KPA14107.1 | DrHyd+nSTAND1+FGS*→                                                                                                            | DrHyd+nSTAND1+FGS | 1037 | MHK_005707        | deltaproteobacteria | Candidatus Magnetomorum sp. HK-1    | signal transduction protein [Candidatus Magnetomorum sp. HK-1].               | GCA_001292585.1 |
| KXX13840.1 | TIR+NACHT+TCAD10+TCAD10→ TIR+FGS*→  <-TRANSGLUTAMINASE                                                                         | TIR+FGS           | 530  | UZ15_CFX003003227 | chloroflexi         | Chloroflexi bacterium OLB15         | serine/threonine protein kinase [Chloroflexi bacterium OLB15].                | GCA_001567085.1 |
| KXX49058.1 | SIG+TM+TM+TM+TM+TM→?→  <-?<-?<-?<-?  FGS*→  <-ABhydrolase  ?→  <-?  ?→?→ ABC-ATPase→                                           | FGS               | 253  | UZ13_03331        | chloroflexi         | Chloroflexi bacterium OLB13         | serine/threonine protein kinase [Chloroflexi bacterium OLB13].                | GCA_001567485.1 |
| MAF11603.1 | SIG+FGS*→                                                                                                                      | SIG+FGS           | 549  | CMK11_14230       | bacteria            | Candidatus Poribacteria bacterium   | hypothetical protein CMK11_14230 [Candidatus Poribacteria bacterium].         | GCA_002687025.1 |
| MAS33641.1 | SAM-methylase→?→?→?→?→ TIR+NACHT+FGS*→                                                                                         | TIR+NACHT+FGS     | 1028 | CL610_06530       | chloroflexi         | Anaerolineaceae bacterium           | hypothetical protein CL610_06530 [Anaerolineaceae bacterium].                 | GCA_002702065.1 |
| MAS34537.1 | TIR+FGS*→  <-?<-?  ?→?→?→?→ Cluster323_2clades→                                                                                | TIR+FGS           | 498  | CL610_11050       | chloroflexi         | Anaerolineaceae bacterium           | hypothetical protein CL610_11050 [Anaerolineaceae bacterium].                 | GCA_002702065.1 |
| MAS34702.1 | ABC-ATPase→?→?→?→ FHA+FHA+TIR→ FGS*→                                                                                           | FGS               | 304  | CL610_11890       | chloroflexi         | Anaerolineaceae bacterium           | hypothetical protein CL610_11890 [Anaerolineaceae bacterium].                 | GCA_002702065.1 |
| MAS35610.1 | FURR-HTH→  <-?<-?<-?<-?  ?→  <-?  TIR+FGS*→?→?→ TIR+APATPase→  <-?<-?<-PSE<-?  TIR+TPR+TPR+TPR+TPR→                            | TIR+FGS           | 528  | CL610_16485       | chloroflexi         | Anaerolineaceae bacterium           | hypothetical protein CL610_16485 [Anaerolineaceae bacterium].                 | GCA_002702065.1 |

| acc        | operon                                                                                                                                                     | architecture          | len  | gen.name    | taxend              | species                              | define                                                                            | gca             |
|------------|------------------------------------------------------------------------------------------------------------------------------------------------------------|-----------------------|------|-------------|---------------------|--------------------------------------|-----------------------------------------------------------------------------------|-----------------|
| MAS36115.1 | TIR+NACHT+TCAD10+TCAD10→ TIR+FGS*→                                                                                                                         | TIR+FGS               | 531  | CL610_19065 | chloroflexi         | Anaerolineaceae bacterium            | hypothetical protein CL610_19065 [Anaerolineaceae bacterium].                     | GCA_002702065.1 |
| MAS36626.1 | TIR+FGS*→  <-?<-?  ?>?>  <-?<-TIR                                                                                                                          | TIR+FGS               | 403  | CL610_21660 | chloroflexi         | Anaerolineaceae bacterium            | hypothetical protein CL610_21660 [Anaerolineaceae bacterium].                     | GCA_002702065.1 |
| MAT95609.1 | MED26C→?> NACHT+FGS*→ RVT→ Four-helical-protein→?>?> MED24→ ABC-ATPase→                                                                                    | NACHT+FGS             | 965  | CL608_00455 | chloroflexi         | Anaerolineaceae bacterium            | hypothetical protein CL608_00455 [Anaerolineaceae bacterium].                     | GCA_002699125.1 |
| MAU09406.1 | <-ABC-ATPase<-?  TIR+FGS*→                                                                                                                                 | TIR+FGS               | 395  | CL607_06270 | chloroflexi         | Anaerolineaceae bacterium            | hypothetical protein CL607_06270 [Anaerolineaceae bacterium].                     | GCA_002699585.1 |
| MAU10918.1 | TIR+FGS*→  <-?<-TIMbarrel                                                                                                                                  | TIR+FGS               | 485  | CL607_13935 | chloroflexi         | Anaerolineaceae bacterium            | hypothetical protein CL607_13935 [Anaerolineaceae bacterium].                     | GCA_002699585.1 |
| MAU11412.1 | ABhydrolase→  <-?<-?<-?  ?> TIR+NACHT+TCAD10+TCAD10→ TIR+FGS*→                                                                                             | TIR+FGS               | 543  | CL607_16440 | chloroflexi         | Anaerolineaceae bacterium            | hypothetical protein CL607_16440 [Anaerolineaceae bacterium].                     | GCA_002699585.1 |
| MQM29574.1 | FGS→  <-FGS                                                                                                                                                | FGS                   | 689  | CRU78_03095 | betaproteobacteria  | Candidatus Accumulibacter phosphatis | hypothetical protein CRU78_03095, partial [Candidatus Accumulibacter phosphatis]. | GCA_009467885.1 |
| MQM29575.1 | FGS*→                                                                                                                                                      | FGS                   | 253  | CRU78_03100 | betaproteobacteria  | Candidatus Accumulibacter phosphatis | hypothetical protein CRU78_03100 [Candidatus Accumulibacter phosphatis].          | GCA_009467885.1 |
| MQM29634.1 | <-CNMP+CRP-HTH  FAD-NAD-dep-oxidoreductase→?>  <-?<-?<-?<-ABhydrolase  nSTAND1+FGS*→  <-SIG+CACHE+TM+PAS+PAS+GGDEF+EAL                                     | nSTAND1+FGS           | 753  | CRU78_03420 | betaproteobacteria  | Candidatus Accumulibacter phosphatis | hypothetical protein CRU78_03420 [Candidatus Accumulibacter phosphatis].          | GCA_009467885.1 |
| MQM32166.1 | EAD8+nSTAND1+FGS*→                                                                                                                                         | EAD8+nSTAND1+FGS      | 832  | CRU78_17325 | betaproteobacteria  | Candidatus Accumulibacter phosphatis | hypothetical protein CRU78_17325 [Candidatus Accumulibacter phosphatis].          | GCA_009467885.1 |
| MQM33262.1 | <-CNMP+CRP-HTH  FAD-NAD-dep-oxidoreductase→?>  <-?<-?<-?<-ABhydrolase  TIR+nSTAND1+FGS*→  <-ABHYDROLASE<-SIG+CACHE+TM+PAS+PAS+GGDEF+EAL<-?  ?> ABC-ATPase→ | TIR+nSTAND1+FGS       | 779  | CRU72_02110 | betaproteobacteria  | Candidatus Accumulibacter phosphatis | hypothetical protein CRU72_02110 [Candidatus Accumulibacter phosphatis].          | GCA_009467855.1 |
| MSP13386.1 | TPR→?>?>  <-ICP8OBfold<-MED26C  ?> TPR→ EAD10+NACHT+FGS*→  <-ABhydrolase                                                                                   | EAD10+NACHT+FGS       | 858  | EXR62_10580 | chloroflexi         | Chloroflexi bacterium                | NACHT domain-containing protein [Chloroflexi bacterium].                          | GCA_009692745.1 |
| MSP38253.1 | DrHyd+nSTAND1+FGS*→                                                                                                                                        | DrHyd+nSTAND1+FGS     | 889  | EXR70_07155 | deltaproteobacteria | Deltaproteobacteria bacterium        | DUF4062 domain-containing protein [Deltaproteobacteria bacterium].                | GCA_009692615.1 |
| MXV93275.1 | TCAD10→ TIR+FGS*→                                                                                                                                          | TIR+FGS               | 544  | F4Z94_07615 | chloroflexi         | Chloroflexi bacterium                | SUMF1/EgtB/PvdO family nonheme iron enzyme [Chloroflexi bacterium].               | -               |
| MYD08867.1 | SIG+TM+TM+TM+TM+TM+TM+TM+TM+TM+TM→?> ABC-ATPase→ ABC-ATPase→?>  <-SIG+TM+TM+TM+TM+TM+TM+TM+TM+TM+TM  TIR+NACHT+TCAD10→ TIR+FGS*→                           | TIR+FGS               | 570  | F4X02_02375 | chloroflexi         | Chloroflexi bacterium                | SUMF1/EgtB/PvdO family nonheme iron enzyme [Chloroflexi bacterium].               | -               |
| MYH66053.1 | SIG+TM+TM+TM+TM+TM+TM+TM+TM+TM+TM→?> ABC-ATPase→ ABC-ATPase→?>  <-SIG+TM+TM+TM+TM+TM+TM+TM+TM+TM+TM  TIR+NACHT+TCAD10→ TIR+FGS*→                           | TIR+FGS               | 544  | F4136_10500 | chloroflexi         | Chloroflexi bacterium                | SUMF1/EgtB/PvdO family nonheme iron enzyme [Chloroflexi bacterium].               | -               |
| NAS88359.1 | Beta-helix+Beta-helix+Beta-helix+ABhydrolase→?> Calcineurin+NACHT+FGS*→  <-?<-tRNA<-?<-?  ?>  <-?<-ParA-Soj-PloopNTPase                                    | Calcineurin+NACHT+FGS | 1124 | C4E24_01245 | euryarchaeota       | ANME-1 cluster archaeon AG-394-G21   | hypothetical protein C4E24_01245 [ANME-1 cluster archaeon AG-394-G21].            | -               |

| acc        | operon                                                                                                                 | architecture          | len  | gen.name    | taxend         | species                            | define                                                                             | gca             |
|------------|------------------------------------------------------------------------------------------------------------------------|-----------------------|------|-------------|----------------|------------------------------------|------------------------------------------------------------------------------------|-----------------|
| NAT10007.1 | Beta-helix+Beta-helix+Beta-helix+ABhydrolase→?→ Calcineurin+NACHT+FGS*→  <?-<tRNA<-?<-?  ?→  <-?<-ParA-Soj-PloopNTPase | Calcineurin+NACHT+FGS | 1123 | C4E22_00360 | eurycarchaeota | ANME-1 cluster archaeon AG-394-G06 | hypothetical protein C4E22_00360 [ANME-1 cluster archaeon AG-394-G06].             | -               |
| NBO65033.1 | NACHT+FGS*→?→  <-Four-helical-protein  RVT→                                                                            | NACHT+FGS             | 795  | EBU88_09360 | acidobacteria  | Acidobacteria bacterium            | NACHT domain-containing protein, partial [Acidobacteria bacterium].                | -               |
| NBO66226.1 | FGS*→                                                                                                                  | FGS                   | 269  | EBU88_15525 | acidobacteria  | Acidobacteria bacterium            | hypothetical protein EBU88_15525, partial [Acidobacteria bacterium].               | -               |
| NCA69346.1 | SWC3→ SIG+NACHT+FGS*→  <-NACHT+FGS<-CASPAE+TCAD1+TCAD2<-?<-REase                                                       | SIG+NACHT+FGS         | 1164 | EOM91_04440 | bacteroidetes  | Sphingobacteriia bacterium         | NACHT domain-containing protein [Sphingobacteriia bacterium].                      | GCA_009928635.1 |
| NCC35438.1 | FGS*→                                                                                                                  | FGS                   | 488  | EOM24_26010 | chloroflexi    | Chloroflexia bacterium             | hypothetical protein EOM24_26010, partial [Chloroflexia bacterium].                | GCA_009929835.1 |
| NCC37506.1 | FGS*→                                                                                                                  | FGS                   | 334  | EOM24_36670 | chloroflexi    | Chloroflexia bacterium             | formylglycine-generating enzyme family protein, partial [Chloroflexia bacterium].  | GCA_009929835.1 |
| NDD63295.1 | TIR→ NACHT+FGS*→                                                                                                       | NACHT+FGS             | 819  | EBZ36_04855 | acidobacteria  | Acidobacteria bacterium            | NACHT domain-containing protein [Acidobacteria bacterium].                         | -               |
| NDD65503.1 | FGS*→                                                                                                                  | FGS                   | 316  | EBZ36_16240 | acidobacteria  | Acidobacteria bacterium            | hypothetical protein EBZ36_16240, partial [Acidobacteria bacterium].               | -               |
| NDD65920.1 | FGS*→                                                                                                                  | FGS                   | 346  | EBZ36_18380 | acidobacteria  | Acidobacteria bacterium            | formylglycine-generating enzyme family protein, partial [Acidobacteria bacterium]. | -               |
| NDJ33386.1 | Pkinase+TCAD10+FGS*→                                                                                                   | Pkinase+TCAD10+FGS    | 476  | GYB64_01830 | chloroflexi    | Chloroflexi bacterium              | SUMF1/EgtB/PvdO family nonheme iron enzyme, partial [Chloroflexi bacterium].       | -               |
| NDJ36083.1 | <-ABhydrolase<-?  ?→ TRANSGLUTAMINASE→ FGS*→                                                                           | FGS                   | 316  | GYB64_15620 | chloroflexi    | Chloroflexi bacterium              | formylglycine-generating enzyme family protein [Chloroflexi bacterium].            | -               |
| NDJ51790.1 | DrHyd+nSTAND1+FGS*→                                                                                                    | DrHyd+nSTAND1+FGS     | 1023 | GYB68_01745 | chloroflexi    | Chloroflexi bacterium              | SUMF1/EgtB/PvdO family nonheme iron enzyme [Chloroflexi bacterium].                | -               |
| NDJ54987.1 | NACHT+FGS*→                                                                                                            | NACHT+FGS             | 957  | GYB68_18090 | chloroflexi    | Chloroflexi bacterium              | SUMF1/EgtB/PvdO family nonheme iron enzyme [Chloroflexi bacterium].                | -               |
| NDJ55381.1 | TIR+FGS*→                                                                                                              | TIR+FGS               | 372  | GYB68_20100 | chloroflexi    | Chloroflexi bacterium              | formylglycine-generating enzyme family protein, partial [Chloroflexi bacterium].   | -               |
| NDJ62967.1 | Pkinase+NACHT+FGS*→                                                                                                    | Pkinase+NACHT+FGS     | 1135 | GYB67_17740 | chloroflexi    | Chloroflexi bacterium              | SUMF1/EgtB/PvdO family nonheme iron enzyme, partial [Chloroflexi bacterium].       | -               |
| NDJ74926.1 | TIR+FGS*→ FGS→                                                                                                         | TIR+FGS               | 407  | GYB65_01595 | chloroflexi    | Chloroflexi bacterium              | SUMF1/EgtB/PvdO family nonheme iron enzyme [Chloroflexi bacterium].                | -               |
| NDJ77993.1 | DrHyd+nSTAND1+FGS*→                                                                                                    | DrHyd+nSTAND1+FGS     | 919  | GYB65_17215 | chloroflexi    | Chloroflexi bacterium              | SUMF1/EgtB/PvdO family nonheme iron enzyme [Chloroflexi bacterium].                | -               |

| acc        | operon                                                             | architecture          | len  | gen.name    | taxend         | species                            | define                                                                                    | gca |
|------------|--------------------------------------------------------------------|-----------------------|------|-------------|----------------|------------------------------------|-------------------------------------------------------------------------------------------|-----|
| NDJ78043.1 | FGS*→?→?→?→?→?→?→  <-BLBD                                          | FGS                   | 497  | GYB65_17470 | chloroflexi    | Chloroflexi bacterium              | formylglycine-generating enzyme family protein, partial [Chloroflexi bacterium].          | -   |
| NDJ79077.1 | FGS*→ Four-helical-protein→  <-?<-MED26C                           | FGS                   | 315  | GYB65_22730 | chloroflexi    | Chloroflexi bacterium              | formylglycine-generating enzyme family protein, partial [Chloroflexi bacterium].          | -   |
| NDJ84742.1 | TIR+FGS*→?→  <-?<-?  ?→?→  <-?  REC→                               | TIR+FGS               | 401  | GYB66_02545 | chloroflexi    | Chloroflexi bacterium              | SUMF1/EgtB/PvdO family nonheme iron enzyme [Chloroflexi bacterium].                       | -   |
| NDJ86912.1 | TIR+FGS*→                                                          | TIR+FGS               | 571  | GYB66_13605 | chloroflexi    | Chloroflexi bacterium              | SUMF1/EgtB/PvdO family nonheme iron enzyme [Chloroflexi bacterium].                       | -   |
| NEP63621.1 | nSTAND1-C+FGS*→  <-EAD1+FGS                                        | nSTAND1-C+FGS         | 517  | F6K31_43145 | cyanobacteria  | Symploca sp. SIO2G7                | formylglycine-generating enzyme family protein [Symploca sp. SIO2G7].                     | -   |
| NET36060.1 | ACYC→ nSTAND1+FGS*→                                                | nSTAND1+FGS           | 814  | F6K19_29210 | cyanobacteria  | Cyanothece sp. SIO1E1              | SUMF1/EgtB/PvdO family nonheme iron enzyme [Cyanothece sp. SIO1E1].                       | -   |
| NGZ09817.1 | FGS*→                                                              | FGS                   | 148  | CV088_10590 | nitrospirae    | Nitrospira sp. LK70                | hypothetical protein CV088_10590 [Nitrospira sp. LK70].                                   | -   |
| NGZ10364.1 | TIR+FGS*→?→  <-?<-?  ?→?→ SIG+TM+HAMP+HISKIN→ SIG+Trypsin+PDZ+PDZ→ | TIR+FGS               | 401  | CV088_13405 | nitrospirae    | Nitrospira sp. LK70                | TIR domain-containing protein [Nitrospira sp. LK70].                                      | -   |
| NGZ10802.1 | DrHyd+iSTAND→ MoxR-AAA→ SIG+VWA→  <-?  TIR+TIR+FGS*→               | TIR+TIR+FGS           | 593  | CV088_15685 | nitrospirae    | Nitrospira sp. LK70                | TIR domain-containing protein [Nitrospira sp. LK70].                                      | -   |
| NGZ11578.1 | SWC3→  <-?<-?  DrHyd+nSTAND1+FGS*→ Four-helical-protein→?→?→ FGS→  | DrHyd+nSTAND1+FGS     | 880  | CV088_19770 | nitrospirae    | Nitrospira sp. LK70                | DUF4062 domain-containing protein [Nitrospira sp. LK70].                                  | -   |
| NIA29268.1 | RVT→ DrHyd→ NACHT+FGS*→ Four-helical-protein→                      | NACHT+FGS             | 707  | GWP06_05045 | actinobacteria | Actinobacteria bacterium           | SUMF1/EgtB/PvdO family nonheme iron enzyme [Actinobacteria bacterium].                    | -   |
| NIA30537.1 | NACHT+FGS*→?→?→ TM+TM+TM+TM+TM+TM+TM→                              | NACHT+FGS             | 847  | GWP06_11575 | actinobacteria | Actinobacteria bacterium           | SUMF1/EgtB/PvdO family nonheme iron enzyme, partial [Actinobacteria bacterium].           | -   |
| NIM11161.1 | NACHT+FGS*→?→ Four-helical-protein→ RVT→ FGS→ Calcineurin→         | NACHT+FGS             | 519  | GTO81_04210 | bacteria       | Candidatus Aminicenantes bacterium | SUMF1/EgtB/PvdO family nonheme iron enzyme, partial [Candidatus Aminicenantes bacterium]. | -   |
| NIM14207.1 | Calcineurin→ NACHT+FGS*→                                           | NACHT+FGS             | 752  | GTO81_19680 | bacteria       | Candidatus Aminicenantes bacterium | SUMF1/EgtB/PvdO family nonheme iron enzyme [Candidatus Aminicenantes bacterium].          | -   |
| NIM14242.1 | NACHT+FGS*→                                                        | NACHT+FGS             | 438  | GTO81_19860 | bacteria       | Candidatus Aminicenantes bacterium | SUMF1/EgtB/PvdO family nonheme iron enzyme, partial [Candidatus Aminicenantes bacterium]. | -   |
| NIM15894.1 | SWC3→?→ Calcineurin+NACHT+FGS*→                                    | Calcineurin+NACHT+FGS | 1153 | GTO81_28290 | bacteria       | Candidatus Aminicenantes bacterium | SUMF1/EgtB/PvdO family nonheme iron enzyme [Candidatus Aminicenantes bacterium].          | -   |

| acc        | operon                                                                               | architecture          | len  | gen.name    | taxend              | species                                   | define                                                                                           | gca |
|------------|--------------------------------------------------------------------------------------|-----------------------|------|-------------|---------------------|-------------------------------------------|--------------------------------------------------------------------------------------------------|-----|
| NIM16827.1 | Calcineurin→ NACHT+FGS*→?→?→?→  <-Cluster235_2clades  ?→ Eukglutathionesyn-ATPgrasp→ | NACHT+FGS             | 835  | GTO81_32990 | bacteria            | Candidatus Aminicenantes bacterium        | SUMF1/EgtB/PvdO family nonheme iron enzyme [Candidatus Aminicenantes bacterium].                 | -   |
| NIM17712.1 | NACHT+FGS→  <-?  Calcineurin+NACHT+FGS*→?→?→  <-?  SIG+TM→                           | Calcineurin+NACHT+FGS | 1126 | GTO81_37510 | bacteria            | Candidatus Aminicenantes bacterium        | SUMF1/EgtB/PvdO family nonheme iron enzyme [Candidatus Aminicenantes bacterium].                 | -   |
| NIM97201.1 | NACHT+FGS*→                                                                          | NACHT+FGS             | 753  | GTO24_03660 | bacteria            | candidate division Zixibacteria bacterium | SUMF1/EgtB/PvdO family nonheme iron enzyme, partial [candidate division Zixibacteria bacterium]. | -   |
| NIO69120.1 | NACHT+FGS*→?→ RVT→ Four-helical-protein→ DrHyd→                                      | NACHT+FGS             | 666  | GTN71_08815 | chloroflexi         | Anaerolineae bacterium                    | SUMF1/EgtB/PvdO family nonheme iron enzyme, partial [Anaerolineae bacterium].                    | -   |
| NIO69566.1 | KAP-NTPase+FGS*→                                                                     | KAP-NTPase+FGS        | 725  | GTN71_11185 | chloroflexi         | Anaerolineae bacterium                    | SUMF1/EgtB/PvdO family nonheme iron enzyme, partial [Anaerolineae bacterium].                    | -   |
| NIO69816.1 | KAP-NTPase+FGS*→ REase→                                                              | KAP-NTPase+FGS        | 741  | GTN71_12500 | chloroflexi         | Anaerolineae bacterium                    | SUMF1/EgtB/PvdO family nonheme iron enzyme [Anaerolineae bacterium].                             | -   |
| NIO71404.1 | TIR+FGS*→                                                                            | TIR+FGS               | 394  | GTN71_20820 | chloroflexi         | Anaerolineae bacterium                    | SUMF1/EgtB/PvdO family nonheme iron enzyme, partial [Anaerolineae bacterium].                    | -   |
| NIP46832.1 | ACYC+NACHT+FGS*→                                                                     | ACYC+NACHT+FGS        | 944  | GWO29_10605 | gammaproteobacteria | Gammaproteobacteria bacterium             | SUMF1/EgtB/PvdO family nonheme iron enzyme [Gammaproteobacteria bacterium].                      | -   |
| NIP84022.1 | FGS*→                                                                                | FGS                   | 268  | GTO03_00060 | planctomycetes      | Planctomycetales bacterium                | SUMF1/EgtB/PvdO family nonheme iron enzyme, partial [Planctomycetales bacterium].                | -   |
| NIW94495.1 | KAP-NTPase→ FGS*→                                                                    | FGS                   | 314  | GWN20_16860 | planctomycetes      | Phycisphaerae bacterium                   | SUMF1/EgtB/PvdO family nonheme iron enzyme [Phycisphaerae bacterium].                            | -   |
| NJD06933.1 | DrHyd+iSTAND→ MoxR-AAA→ SIG+VWA→ vWA-L+TIR+DrHyd+FGS*→                               | vWA-L+TIR+DrHyd+FGS   | 905  | FIA97_10615 | gammaproteobacteria | Methylococcaceae bacterium                | DUF4062 domain-containing protein [Methylococcaceae bacterium].                                  | -   |
| NJL17799.1 | FGS*→                                                                                | FGS                   | 337  | HC938_11975 | nitrospirae         | Nitrospira sp.                            | formylglycine-generating enzyme family protein, partial [Nitrospira sp.].                        | -   |
| NJL55027.1 | TIR→ NACHT+FGS→ PSE→ Four-helical-protein→ TIR+FGS→                                  | NACHT+FGS             | 859  | HC928_07430 | bacteria            | bacterium                                 | SUMF1/EgtB/PvdO family nonheme iron enzyme [bacterium].                                          | -   |
| NJL55029.1 | TIR+FGS*→                                                                            | TIR+FGS               | 428  | HC928_07445 | bacteria            | bacterium                                 | SUMF1/EgtB/PvdO family nonheme iron enzyme [bacterium].                                          | -   |
| NJL55119.1 | TIR→ NACHT+FGS*→                                                                     | NACHT+FGS             | 721  | HC928_07980 | bacteria            | bacterium                                 | formylglycine-generating enzyme family protein [bacterium].                                      | -   |
| NJL55722.1 | TIR+FGS*→                                                                            | TIR+FGS               | 402  | HC928_11325 | bacteria            | bacterium                                 | SUMF1/EgtB/PvdO family nonheme iron enzyme [bacterium].                                          | -   |

| acc        | operon                                                                                                                     | architecture          | len  | gen.name    | taxend              | species                       | define                                                                            | gca |
|------------|----------------------------------------------------------------------------------------------------------------------------|-----------------------|------|-------------|---------------------|-------------------------------|-----------------------------------------------------------------------------------|-----|
| NJL93048.1 | <-TIMbarrel<-?<-?<-?  FGS*→                                                                                                | FGS                   | 308  | HC915_04650 | chloroflexi         | Anaerolineae bacterium        | formylglycine-generating enzyme family protein [Anaerolineae bacterium].          | -   |
| NJL95335.1 | FGS*→?→?→?→  <-SIG+TM+HAMP+HISKIN                                                                                          | FGS                   | 212  | HC915_17250 | chloroflexi         | Anaerolineae bacterium        | formylglycine-generating enzyme family protein, partial [Anaerolineae bacterium]. | -   |
| NJN82052.1 | FGS*→                                                                                                                      | FGS                   | 310  | HC802_07060 | chloroflexi         | Caldilineaceae bacterium      | formylglycine-generating enzyme family protein [Caldilineaceae bacterium].        | -   |
| NJN93303.1 | NACHT+FGS*→                                                                                                                | NACHT+FGS             | 695  | HC875_04045 | chloroflexi         | Anaerolineales bacterium      | SUMF1/EgtB/PvdO family nonheme iron enzyme [Anaerolineales bacterium].            | -   |
| NJN94208.1 | FGS*→  <-?<-?<-PSE  ?→ PSE→?→?→  <-PSE<-YBAK                                                                               | FGS                   | 242  | HC875_09015 | chloroflexi         | Anaerolineales bacterium      | formylglycine-generating enzyme family protein [Anaerolineales bacterium].        | -   |
| NJN98786.1 | NACHT+FGS*→ FGS→                                                                                                           | NACHT+FGS             | 463  | HC875_34180 | chloroflexi         | Anaerolineales bacterium      | SUMF1/EgtB/PvdO family nonheme iron enzyme [Anaerolineales bacterium].            | -   |
| NJN99601.1 | NACHT→?→ FGS*→                                                                                                             | FGS                   | 264  | HC875_38615 | chloroflexi         | Anaerolineales bacterium      | formylglycine-generating enzyme family protein [Anaerolineales bacterium].        | -   |
| NJP06778.1 | VWA+FGS*→  <-PSE<-PSE<-?<-tRNA  SbcC+SbcC→                                                                                 | VWA+FGS               | 782  | HC837_14760 | chloroflexi         | Chloroflexaceae bacterium     | SUMF1/EgtB/PvdO family nonheme iron enzyme [Chloroflexaceae bacterium].           | -   |
| NJP06949.1 | <-FGS  ?→?→?→?→?→ Pkinase+FGS*→                                                                                            | Pkinase+FGS           | 514  | HC837_15690 | chloroflexi         | Chloroflexaceae bacterium     | SUMF1/EgtB/PvdO family nonheme iron enzyme [Chloroflexaceae bacterium].           | -   |
| NJP07891.1 | FGS*→                                                                                                                      | FGS                   | 408  | HC837_20850 | chloroflexi         | Chloroflexaceae bacterium     | formylglycine-generating enzyme family protein [Chloroflexaceae bacterium].       | -   |
| NKB76742.1 | <-Four-helical-protein  RVT→ DrHyd→<br>NACHT+FGS*→  <-?<-SIG+TM+TM+TM+TM+TM+TM+TM+TM+TM+TM<-PAS+HISKIN+REC<-?<-REC+ACYC    | NACHT+FGS             | 610  | GKR96_06745 | gammaproteobacteria | Gammaproteobacteria bacterium | SUMF1/EgtB/PvdO family nonheme iron enzyme [Gammaproteobacteria bacterium].       | -   |
| NKQ37578.1 | NACHT+FGS*→?→?→?→  <-?<-ABC-ATPase<-?  ?→  <-LittleFinger                                                                  | NACHT+FGS             | 946  | HF973_18435 | chloroflexi         | Chloroflexi bacterium         | SUMF1/EgtB/PvdO family nonheme iron enzyme [Chloroflexi bacterium].               | -   |
| NLE52136.1 | FGS*→  <-RVT                                                                                                               | FGS                   | 304  | GX613_12100 | chloroflexi         | Chloroflexi bacterium         | formylglycine-generating enzyme family protein, partial [Chloroflexi bacterium].  | -   |
| NLF75470.1 | TIR+TM+NACHT+7xTM+FGS*→?→?→  <-ABhydrolase<-ABhydrolase<-?<-ABhydrolase<-?  wHHTH-4stranded+TPRs+nSTAND1+TM+BetaPropeller→ | TIR+TM+NACHT+7xTM+FGS | 1172 | GX573_07210 | chloroflexi         | Chloroflexi bacterium         | SUMF1/EgtB/PvdO family nonheme iron enzyme [Chloroflexi bacterium].               | -   |
| NLF75680.1 | SWC3→?→?→?→?→ TIR+NACHT+FGS*→                                                                                              | TIR+NACHT+FGS         | 818  | GX573_08280 | chloroflexi         | Chloroflexi bacterium         | SUMF1/EgtB/PvdO family nonheme iron enzyme [Chloroflexi bacterium].               | -   |
| NLF77023.1 | <-TIR+APATPase+BetaPropeller  ?→?→ TIR→?→  <-PSE  FGS*→                                                                    | FGS                   | 224  | GX573_15095 | chloroflexi         | Chloroflexi bacterium         | formylglycine-generating enzyme family protein, partial [Chloroflexi bacterium].  | -   |
| NLF78373.1 | DrHyd+nSTAND1+FGS*→                                                                                                        | DrHyd+nSTAND1+FGS     | 972  | GX573_21985 | chloroflexi         | Chloroflexi bacterium         | SUMF1/EgtB/PvdO family nonheme iron enzyme [Chloroflexi bacterium].               | -   |

| acc        | operon                                                                                                   | architecture     | len  | gen.name    | taxend              | species                                     | define                                                                                 | gca             |
|------------|----------------------------------------------------------------------------------------------------------|------------------|------|-------------|---------------------|---------------------------------------------|----------------------------------------------------------------------------------------|-----------------|
| NLF78947.1 | FGS*→                                                                                                    | FGS              | 250  | GX573_24915 | chloroflexi         | Chloroflexi bacterium                       | formylglycine-generating enzyme family protein [Chloroflexi bacterium].                | -               |
| NLF78951.1 | TIR+FGS*→                                                                                                | TIR+FGS          | 508  | GX573_24935 | chloroflexi         | Chloroflexi bacterium                       | SUMF1/EgtB/PvdO family nonheme iron enzyme, partial [Chloroflexi bacterium].           | -               |
| NLF78992.1 | TIR+NACHT+FGS→?→ <i>DrHyd+nSTAND1+FGS</i> →                                                              | TIR+NACHT+FGS    | 993  | GX573_25145 | chloroflexi         | Chloroflexi bacterium                       | SUMF1/EgtB/PvdO family nonheme iron enzyme [Chloroflexi bacterium].                    | -               |
| NLF78994.1 | TIR+NACHT+FGS*→                                                                                          | TIR+NACHT+FGS    | 923  | GX573_25155 | chloroflexi         | Chloroflexi bacterium                       | SUMF1/EgtB/PvdO family nonheme iron enzyme [Chloroflexi bacterium].                    | -               |
| NLS76118.1 | FGS→ CASPASE+TCAD1+TCAD2→ NACHT+FGS→ NACHT+FGS*→                                                         | NACHT+FGS        | 1049 | GXY76_02550 | chloroflexi         | Chloroflexi bacterium                       | SUMF1/EgtB/PvdO family nonheme iron enzyme [Chloroflexi bacterium].                    | -               |
| NLX11872.1 | <-DrHyd<-?<-?  FGS*→                                                                                     | FGS              | 250  | GXY36_19670 | chloroflexi         | Chloroflexi bacterium                       | formylglycine-generating enzyme family protein [Chloroflexi bacterium].                | -               |
| NMB90542.1 | TPR→?→ FGS*→                                                                                             | FGS              | 276  | GYA17_19435 | chloroflexi         | Chloroflexi bacterium                       | formylglycine-generating enzyme family protein [Chloroflexi bacterium].                | -               |
| NMC02153.1 | FGS*→                                                                                                    | FGS              | 221  | GYA30_07250 | chloroflexi         | Chloroflexi bacterium                       | formylglycine-generating enzyme family protein, partial [Chloroflexi bacterium].       | -               |
| NMC03023.1 | NACHT+FGS*→                                                                                              | NACHT+FGS        | 839  | GYA30_11700 | chloroflexi         | Chloroflexi bacterium                       | SUMF1/EgtB/PvdO family nonheme iron enzyme, partial [Chloroflexi bacterium].           | -               |
| NMC11372.1 | TPR→?→ FGS*→?→?→?→?→?→ SIG+TM→                                                                           | FGS              | 262  | GYA34_00645 | chloroflexi         | Chloroflexi bacterium                       | formylglycine-generating enzyme family protein [Chloroflexi bacterium].                | -               |
| NMQ05699.1 | FGS*→  <-TRANSGLUTAMINASE  ?→  <-?  PSE→?→  <-Patatin                                                    | FGS              | 259  | E4Q08_10675 | betaproteobacteria  | Candidatus Accumulibacter phosphatis        | hypothetical protein E4Q08_10675 [Candidatus Accumulibacter phosphatis].               | -               |
| NMQ07713.1 | TIR→ MoxR-AAA→ MED26C→ SIG+FGS*→  <-RVT  Four-helical-protein→  <-SIG+FGS<-?<-?<-ABC-ATPase              | SIG+FGS          | 803  | E4Q08_21970 | betaproteobacteria  | Candidatus Accumulibacter phosphatis        | hypothetical protein E4Q08_21970 [Candidatus Accumulibacter phosphatis].               | -               |
| NMQ07738.1 | <-BLBD<-?  ?→?→  <-?<-PSE<-?<-?  TIR+nSTAND1+FGS*→ FGS→  <-Four-helical-protein  RVT→  <-TIR+FGS<-?<-RVT | TIR+nSTAND1+FGS  | 955  | E4Q08_22105 | betaproteobacteria  | Candidatus Accumulibacter phosphatis        | TIR domain-containing protein [Candidatus Accumulibacter phosphatis].                  | -               |
| NNJ84960.1 | FGS*→                                                                                                    | FGS              | 333  | HKP13_08525 | gammaproteobacteria | Gammaproteobacteria bacterium               | SUMF1/EgtB/PvdO family nonheme iron enzyme [Gammaproteobacteria bacterium].            | -               |
| NNK95096.1 | NACHT+FGS*→                                                                                              | NACHT+FGS        | 471  | HKP41_12165 | deltaproteobacteria | Desulfobacterales bacterium                 | formylglycine-generating enzyme family protein, partial [Desulfobacterales bacterium]. | -               |
| OAI48271.1 | EAD1+nSTAND1+FGS*→?→ EAD1+Trypsin→  <-?  ?→?→ VWA→                                                       | EAD1+nSTAND1+FGS | 770  | AYO44_07515 | planctomycetes      | Planctomycetaceae bacterium SCGC AG-212-F19 | hypothetical protein AYO44_07515 [Planctomycetaceae bacterium SCGC AG-212-F19].        | GCA_001644415.1 |

| acc        | operon                                                                             | architecture      | len  | gen.name    | taxend              | species                             | define                                                                       | gca             |
|------------|------------------------------------------------------------------------------------|-------------------|------|-------------|---------------------|-------------------------------------|------------------------------------------------------------------------------|-----------------|
| OGO38189.1 | <-ABhydrolase<-?<-?<-PSE<-PSE<-TIMbarrel  ?>  <-?<-?  FGS*→                        | FGS               | 282  | A2W35_08715 | chloroflexi         | Chloroflexi bacterium RBG_16_57_11  | hypothetical protein A2W35_08715 [Chloroflexi bacterium RBG_16_57_11].       | GCA_001795165.1 |
| OGO41187.1 | SIG+TM+NACHT+FGS*→                                                                 | SIG+TM+NACHT+FGS  | 973  | A2W36_01705 | chloroflexi         | Chloroflexi bacterium RBG_16_58_14  | hypothetical protein A2W36_01705 [Chloroflexi bacterium RBG_16_58_14].       | GCA_001796915.1 |
| OIO90464.1 | PIN→?→?→?→ CASPASE+FGS*→                                                           | CASPASE+FGS       | 501  | AUK03_12910 | chloroflexi         | Anaerolineae bacterium CG2_30_64_16 | hypothetical protein AUK03_12910 [Anaerolineae bacterium CG2_30_64_16].      | GCA_001871755.1 |
| OQA20201.1 | NACHT+FGS*→                                                                        | NACHT+FGS         | 1059 | pkn1_2      | chloroflexi         | Chloroflexi bacterium ADurb.Bin360  | Serine/threonine-protein kinase pkn1 [Chloroflexi bacterium ADurb.Bin360].   | GCA_002068755.1 |
| OQA95056.1 | NACHT+FGS*→                                                                        | NACHT+FGS         | 891  | pkn1_5      | chloroflexi         | Chloroflexi bacterium ADurb.Bin222  | Serine/threonine-protein kinase pkn1 [Chloroflexi bacterium ADurb.Bin222].   | GCA_002069935.1 |
| OQA95154.1 | FGS*→?→ RVT→ Four-helical-protein→                                                 | FGS               | 256  | pkn1_4      | chloroflexi         | Chloroflexi bacterium ADurb.Bin222  | Serine/threonine-protein kinase pkn1 [Chloroflexi bacterium ADurb.Bin222].   | GCA_002069935.1 |
| OQB01206.1 | <-SIG+TPR+TPR+TPR<-?<-?<-?  FGS*→                                                  | FGS               | 260  | pkn1_3      | chloroflexi         | Chloroflexi bacterium ADurb.Bin222  | Serine/threonine-protein kinase pkn1 [Chloroflexi bacterium ADurb.Bin222].   | GCA_002069935.1 |
| OQB02365.1 | TM→?→?→ EAD7→?→?→?→ ZNR+NACHT+FGS*→ RVT→                                           | ZNR+NACHT+FGS     | 965  | egtB        | chloroflexi         | Chloroflexi bacterium ADurb.Bin222  | Iron(II)-dependent oxidoreductase EgtB [Chloroflexi bacterium ADurb.Bin222]. | GCA_002069935.1 |
| OQW81078.1 | ABC-ATPase→ DrHyd+nSTAND1+FGS*→                                                    | DrHyd+nSTAND1+FGS | 908  | BVN30_11975 | proteobacteria      | Proteobacteria bacterium ST_bin16   | hypothetical protein BVN30_11975 [Proteobacteria bacterium ST_bin16].        | GCA_002083595.1 |
| OQX00845.1 | TIR+NACHT+FGS*→                                                                    | TIR+NACHT+FGS     | 954  | BWK73_47570 | gammaproteobacteria | Thiothrix lacustris                 | hypothetical protein BWK73_47570 [Thiothrix lacustris].                      | GCA_002083875.1 |
| OQX02689.1 | TIR+FGS*→  <-RVT                                                                   | TIR+FGS           | 455  | BWK73_41905 | gammaproteobacteria | Thiothrix lacustris                 | hypothetical protein BWK73_41905 [Thiothrix lacustris].                      | GCA_002083875.1 |
| OQX03012.1 | FGS→ SIG+TM+NACHT+FGS*→ RVT→ Four-helical-protein→                                 | SIG+TM+NACHT+FGS  | 959  | BWK73_40840 | gammaproteobacteria | Thiothrix lacustris                 | hypothetical protein BWK73_40840 [Thiothrix lacustris].                      | GCA_002083875.1 |
| OQX05770.1 | TIR+NACHT+FGS*→?→ MED26C→ ABhydrolase→                                             | TIR+NACHT+FGS     | 934  | BWK73_32675 | gammaproteobacteria | Thiothrix lacustris                 | hypothetical protein BWK73_32675 [Thiothrix lacustris].                      | GCA_002083875.1 |
| OQX14334.1 | <-PAS+HISKIN+REC  ?>  <-?  ?>  <-?  ?>  <-?  TIR+FGS*→  <-?  ?>→  <-PAS+HISKIN+REC | TIR+FGS           | 427  | BWK73_09810 | gammaproteobacteria | Thiothrix lacustris                 | hypothetical protein BWK73_09810 [Thiothrix lacustris].                      | GCA_002083875.1 |
| OQY20877.1 | ZNR+NACHT→ ZNR+NACHT+FGS*→                                                         | ZNR+NACHT+FGS     | 991  | B6I35_09750 | chloroflexi         | Anaerolineaceae bacterium 4572_32.2 | hypothetical protein B6I35_09750 [Anaerolineaceae bacterium 4572_32.2].      | GCA_002084625.1 |
| OQY22096.1 | KAP-NTPase+FGS*→  <-?<-?<-PSE<-TPR+TPR+TPR+TPR                                     | KAP-NTPase+FGS    | 762  | B6I35_06850 | chloroflexi         | Anaerolineaceae bacterium 4572_32.2 | hypothetical protein B6I35_06850 [Anaerolineaceae bacterium 4572_32.2].      | GCA_002084625.1 |
| OQY80126.1 | FGS*→  <-ABhydrolase                                                               | FGS               | 253  | B6D42_13475 | chloroflexi         | Anaerolineae bacterium UTCFX5       | hypothetical protein B6D42_13475 [Anaerolineae bacterium UTCFX5].            | GCA_002050245.1 |



| acc        | operon                                                                                     | architecture      | len  | gen.name    | taxend              | species                                            | define                                                                                 | gca             |
|------------|--------------------------------------------------------------------------------------------|-------------------|------|-------------|---------------------|----------------------------------------------------|----------------------------------------------------------------------------------------|-----------------|
| PJF29540.1 | DrHyd→ nSTAND1+FGS*→                                                                       | nSTAND1+FGS       | 718  | CUN52_07865 | chloroflexi         | Candidatus Thermofonsia Clade 2 bacterium          | hypothetical protein CUN52_07865 [Candidatus Thermofonsia Clade 2 bacterium].          | GCA_002794515.1 |
| PJF30051.1 | TIR+FGS*→                                                                                  | TIR+FGS           | 445  | CUN52_05275 | chloroflexi         | Candidatus Thermofonsia Clade 2 bacterium          | hypothetical protein CUN52_05275, partial [Candidatus Thermofonsia Clade 2 bacterium]. | GCA_002794515.1 |
| PJF30836.1 | TIR+FGS*→                                                                                  | TIR+FGS           | 513  | CUN51_06530 | chloroflexi         | Candidatus Thermofonsia Clade 1 bacterium          | hypothetical protein CUN51_06530 [Candidatus Thermofonsia Clade 1 bacterium].          | GCA_002794705.1 |
| PJF31663.1 | <-ABhydrolase  DrHyd+nSTAND1+FGS*→                                                         | DrHyd+nSTAND1+FGS | 1006 | CUN52_02370 | chloroflexi         | Candidatus Thermofonsia Clade 2 bacterium          | hypothetical protein CUN52_02370 [Candidatus Thermofonsia Clade 2 bacterium].          | GCA_002794515.1 |
| PJF37172.1 | TIR+FGS*→                                                                                  | TIR+FGS           | 525  | CUN49_01770 | chloroflexi         | Candidatus Thermofonsia Clade 1 bacterium          | hypothetical protein CUN49_01770 [Candidatus Thermofonsia Clade 1 bacterium].          | GCA_002794555.1 |
| PJF43622.1 | TIR+FGS*→                                                                                  | TIR+FGS           | 486  | CUN55_08140 | chloroflexi         | Candidatus Thermofonsia Clade 2 bacterium          | hypothetical protein CUN55_08140, partial [Candidatus Thermofonsia Clade 2 bacterium]. | GCA_002794585.1 |
| PJF44139.1 | FGS*→                                                                                      | FGS               | 376  | CUN55_05530 | chloroflexi         | Candidatus Thermofonsia Clade 2 bacterium          | hypothetical protein CUN55_05530 [Candidatus Thermofonsia Clade 2 bacterium].          | GCA_002794585.1 |
| PUB73139.1 | ABHYDROLASE→?→?→ drhyd+NACHT+FGS*→  <-?<-?<-SIG+CACHE+TM+PAS+PAS+GGDEF+EAL<-?  ?→?→  <-CBS | drhyd+NACHT+FGS   | 1022 | DBO99_20690 | gammaproteobacteria | gamma proteobacterium symbiont of Ctena orbiculata | hypothetical protein DBO99_20690 [gamma proteobacterium symbiont of Ctena orbiculata]. | GCA_003058485.1 |
| PUB73261.1 | ABHYDROLASE→?→?→ drhyd+NACHT+FGS*→  <-?<-?<-SIG+CACHE+TM+PAS+PAS+GGDEF+EAL                 | drhyd+NACHT+FGS   | 1022 | DBP03_13830 | gammaproteobacteria | gamma proteobacterium symbiont of Ctena orbiculata | hypothetical protein DBP03_13830 [gamma proteobacterium symbiont of Ctena orbiculata]. | GCA_003058495.1 |
| PUB76292.1 | TIR+nSTAND1+FGS→ FGS→ FGS→  <-RVT<-?<-TIR+FGS*<-MoxR-AAA<-TIR<-TIR+TCAD2                   | TIR+nSTAND1+FGS   | 913  | DBP03_04845 | gammaproteobacteria | gamma proteobacterium symbiont of Ctena orbiculata | hypothetical protein DBP03_04845 [gamma proteobacterium symbiont of Ctena orbiculata]. | GCA_003058495.1 |
| PUB76293.1 | FGS*→                                                                                      | FGS               | 255  | DBP03_04850 | gammaproteobacteria | gamma proteobacterium symbiont of Ctena orbiculata | hypothetical protein DBP03_04850 [gamma proteobacterium symbiont of Ctena orbiculata]. | GCA_003058495.1 |
| PUB76297.1 | TIR+FGS*→                                                                                  | TIR+FGS           | 961  | DBP03_04870 | gammaproteobacteria | gamma proteobacterium symbiont of Ctena orbiculata | hypothetical protein DBP03_04870 [gamma proteobacterium symbiont of Ctena orbiculata]. | GCA_003058495.1 |
| PWB73128.1 | nSTAND1-C+FGS*→  <-RVT  Four-helical-protein→  <-FGS                                       | nSTAND1-C+FGS     | 467  | C3F07_10390 | chloroflexi         | Anaerolineales bacterium                           | hypothetical protein C3F07_10390, partial [Anaerolineales bacterium].                  | GCA_003105325.1 |

| acc        | operon                                                                                             | architecture                       | len  | gen.name    | taxend              | species                                | define                                                                              | gca             |
|------------|----------------------------------------------------------------------------------------------------|------------------------------------|------|-------------|---------------------|----------------------------------------|-------------------------------------------------------------------------------------|-----------------|
| PWH19196.1 | TPR→?→ FGS*→                                                                                       | FGS                                | 269  | DDG59_03890 | chloroflexi         | Anaerolineae bacterium                 | formylglycine-generating enzyme family protein [Anaerolineae bacterium].            | GCA_003130835.1 |
| PYR00059.1 | drhyd+NACHT+FGS*→?→ ORF6N→ VWA→                                                                    | drhyd+NACHT+FGS                    | 998  | DMF96_04700 | acidobacteria       | Acidobacteria bacterium                | hypothetical protein DMF96_04700 [Acidobacteria bacterium].                         | GCA_003222505.1 |
| PYR17830.1 | SIG+HISKIN+REC→?→ drhyd+NACHT+FGS*→?→ ORF6N→ VWA→                                                  | drhyd+NACHT+FGS                    | 998  | DMF94_22285 | acidobacteria       | Acidobacteria bacterium                | hypothetical protein DMF94_22285 [Acidobacteria bacterium].                         | GCA_003222535.1 |
| PYR41523.1 | drhyd+NACHT+FGS*→?→ ORF6N→ VWA→                                                                    | drhyd+NACHT+FGS                    | 858  | DMF95_30835 | acidobacteria       | Acidobacteria bacterium                | hypothetical protein DMF95_30835, partial [Acidobacteria bacterium].                | GCA_003223755.1 |
| PZN49102.1 | TIR+FGS*→                                                                                          | TIR+FGS                            | 519  | DIU68_20660 | chloroflexi         | Chloroflexi bacterium                  | hypothetical protein DIU68_20660 [Chloroflexi bacterium].                           | GCA_003242205.1 |
| PZN54847.1 | ABC-ATPase→?→  <-Cluster235_2clades<-?<-SIG+TM+TM+TM+TM+TM+TM<-?  FGS*→                            | FGS                                | 254  | DIU68_09635 | chloroflexi         | Chloroflexi bacterium                  | hypothetical protein DIU68_09635 [Chloroflexi bacterium].                           | GCA_003242205.1 |
| PZN71605.1 | FGS*→  <-RVT                                                                                       | FGS                                | 215  | DM484_25995 | gammaproteobacteria | Candidatus Methylomidiphilus alinensis | hypothetical protein DM484_25995, partial [Candidatus Methylomidiphilus alinensis]. | GCA_003242955.1 |
| PZN73048.1 | nSTAND1-C+FGS*→                                                                                    | nSTAND1-C+FGS                      | 478  | DM484_23385 | gammaproteobacteria | Candidatus Methylomidiphilus alinensis | hypothetical protein DM484_23385, partial [Candidatus Methylomidiphilus alinensis]. | GCA_003242955.1 |
| PZN74864.1 | CASPASE+NACHT+FGS*→?→ Trypco1→                                                                     | CASPASE+NACHT+FGS                  | 1074 | DM484_20170 | gammaproteobacteria | Candidatus Methylomidiphilus alinensis | hypothetical protein DM484_20170 [Candidatus Methylomidiphilus alinensis].          | GCA_003242955.1 |
| PZN74977.1 | NACHT+FGS*→  <-?<-Four-helical-protein  RVT→  <-NACHT+FGS<-?<-TIR<-DrHyd                           | NACHT+FGS                          | 914  | DM484_19825 | gammaproteobacteria | Candidatus Methylomidiphilus alinensis | hypothetical protein DM484_19825 [Candidatus Methylomidiphilus alinensis].          | GCA_003242955.1 |
| PZN77746.1 | DrHyd+nSTAND1+FGS*→                                                                                | DrHyd+nSTAND1+FGS                  | 1041 | DM484_14085 | gammaproteobacteria | Candidatus Methylomidiphilus alinensis | hypothetical protein DM484_14085 [Candidatus Methylomidiphilus alinensis].          | GCA_003242955.1 |
| PZN84786.1 | <-SAM-methylase<-?<-?  ?→?→?→ drhyd+NACHT+FGS*→                                                    | drhyd+NACHT+FGS                    | 1034 | DM484_02145 | gammaproteobacteria | Candidatus Methylomidiphilus alinensis | hypothetical protein DM484_02145 [Candidatus Methylomidiphilus alinensis].          | GCA_003242955.1 |
| RCK71670.1 | TPR→?→ FGS*→  <-?<-?<-?<-?  ?→?→ SIG+TM+TM+TM+TM+TM+TM+TM+TM+TM→                                   | FGS                                | 269  | ANABAC_1196 | chloroflexi         | Anaerolineae bacterium                 | serine/threonine kinase [Anaerolineae bacterium].                                   | GCA_003327455.1 |
| RCV64808.1 | TIR→ ParA-Soj-PloopNTPase+TIR+NACHT+FGS→?→ <i>Calcineurin+NACHT+FGS</i> →?→?→?→?→?→  <-?  LRP-HTH→ | ParA-Soj-PloopNTPase+TIR+NACHT+FGS | 1130 | C5S53_06925 | eurychaeota         | Methanophagales archaeon               | Formylglycine-generating enzyme [Methanophagales archaeon].                         | GCA_003336485.1 |
| RCV64810.1 | ParA-Soj-PloopNTPase+TIR+NACHT+FGS*→                                                               | ParA-Soj-PloopNTPase+TIR+NACHT+FGS | 1273 | C5S53_06935 | eurychaeota         | Methanophagales archaeon               | Formylglycine-generating enzyme [Methanophagales archaeon].                         | GCA_003336485.1 |
| RDE49756.1 | TIR+nSTAND1+FGS*→  <-?<-?  ?→?→ KAP-NTPase→                                                        | TIR+nSTAND1+FGS                    | 1034 | DVS81_14945 | betaproteobacteria  | Candidatus Accumulibacter phosphatis   | TIR domain-containing protein [Candidatus Accumulibacter phosphatis].               | GCA_003332265.1 |
| RDE50257.1 | TIR+NACHT+FGS*→  <-?<-FGS                                                                          | TIR+NACHT+FGS                      | 962  | DVS81_12365 | betaproteobacteria  | Candidatus Accumulibacter phosphatis   | TIR domain-containing protein [Candidatus Accumulibacter phosphatis].               | GCA_003332265.1 |

| acc        | operon                                                                                                                                              | architecture      | len | gen.name    | taxend             | species                                     | define                                                                          | gca             |
|------------|-----------------------------------------------------------------------------------------------------------------------------------------------------|-------------------|-----|-------------|--------------------|---------------------------------------------|---------------------------------------------------------------------------------|-----------------|
| RDE50357.1 | FAD-NAD-dep-oxidoreductase→?→  <?<?<?<ABhydrolase  ?→<br>nSTAND1+FGS*→  <-SIG+CACHE+TM+PAS+PAS+GGDEF+EAL<-?  ?→  <-PIN                              | nSTAND1+FGS       | 753 | DVS81_11680 | betaproteobacteria | Candidatus Accumulibacter phosphatis        | hypothetical protein DVS81_11680 [Candidatus Accumulibacter phosphatis].        | GCA_003332265.1 |
| RDE51785.1 | EAD8+nSTAND1+FGS*→ EAD8+TIR+NACHT+FGS→                                                                                                              | EAD8+nSTAND1+FGS  | 830 | DVS81_03940 | betaproteobacteria | Candidatus Accumulibacter phosphatis        | hypothetical protein DVS81_03940 [Candidatus Accumulibacter phosphatis].        | GCA_003332265.1 |
| RIK31324.1 | KAP-NTPase+FGS*→  <-?<-ICP8OBfold<-MED26C                                                                                                           | KAP-NTPase+FGS    | 831 | DCC56_03825 | chloroflexi        | Anaerolineae bacterium                      | hypothetical protein DCC56_03825 [Anaerolineae bacterium].                      | GCA_003577395.1 |
| RIK35349.1 | NACHT+FGS*→                                                                                                                                         | NACHT+FGS         | 973 | DCC55_30565 | chloroflexi        | Chloroflexi bacterium                       | hypothetical protein DCC55_30565 [Chloroflexi bacterium].                       | GCA_003577005.1 |
| RIL10952.1 | EAD8→?→ EAD8→ KAP-NTPase+FGS*→ TIR→  <?  ACYC+APATPase+TPR→  <?  ?→  <-ACYC+NACHT+FGS                                                               | KAP-NTPase+FGS    | 836 | DCC79_06390 | bacteria           | bacterium                                   | hypothetical protein DCC79_06390 [bacterium].                                   | GCA_003576755.1 |
| RIL11051.1 | EAD8+NACHT+FGS*→  <-EAD8+NACHT+FGS                                                                                                                  | EAD8+NACHT+FGS    | 967 | DCC79_06090 | bacteria           | bacterium                                   | hypothetical protein DCC79_06090 [bacterium].                                   | GCA_003576755.1 |
| RIL11755.1 | FGS→  <-?<-?  ?→ PSE→ PSE→?→ TIR+NACHT+FGS→ FGS→  <-Four-helical-protein  RVT→  <-DrHyd+nSTAND1+FGS  ?→?→<br>ABhydrolase+ABhydrolase+CASPASE+TPR-S→ | TIR+NACHT+FGS     | 995 | DCC79_03775 | bacteria           | bacterium                                   | hypothetical protein DCC79_03775 [bacterium].                                   | GCA_003576755.1 |
| RIL11759.1 | DrHyd+nSTAND1+FGS*→                                                                                                                                 | DrHyd+nSTAND1+FGS | 944 | DCC79_03795 | bacteria           | bacterium                                   | hypothetical protein DCC79_03795 [bacterium].                                   | GCA_003576755.1 |
| RKU24994.1 | HSP70→ FGS→ DNAJ+FGS*→                                                                                                                              | DNAJ+FGS          | 445 | C6499_15805 | bacteria           | Candidatus Poribacteria bacterium           | hypothetical protein C6499_15805 [Candidatus Poribacteria bacterium].           | GCA_003635255.1 |
| RLC59981.1 | ABC-ATPase→?→ KAP-NTPase+FGS*→                                                                                                                      | KAP-NTPase+FGS    | 780 | DRI80_11660 | chloroflexi        | Chloroflexi bacterium                       | hypothetical protein DRI80_11660 [Chloroflexi bacterium].                       | GCA_003647875.1 |
| RLC64729.1 | <-Cluster366_2clades<-?<-?  ACYC+ACYC+SWACOS+TPR+TPR+TPR→?→?→?→ KAP-NTPase+FGS*→                                                                    | KAP-NTPase+FGS    | 778 | DRI80_00630 | chloroflexi        | Chloroflexi bacterium                       | hypothetical protein DRI80_00630 [Chloroflexi bacterium].                       | GCA_003647875.1 |
| RLC71356.1 | NACHT+FGS*→ Four-helical-protein→                                                                                                                   | NACHT+FGS         | 843 | DRI81_17855 | chloroflexi        | Chloroflexi bacterium                       | hypothetical protein DRI81_17855, partial [Chloroflexi bacterium].              | GCA_003648025.1 |
| RLC71990.1 | FGS*→                                                                                                                                               | FGS               | 341 | DRI81_16965 | chloroflexi        | Chloroflexi bacterium                       | hypothetical protein DRI81_16965 [Chloroflexi bacterium].                       | GCA_003648025.1 |
| RLC79416.1 | KAP-NTPase+FGS*→  <-?<-?<-?<-TPR+TPR+TPR+TPR                                                                                                        | KAP-NTPase+FGS    | 762 | DRI81_05360 | chloroflexi        | Chloroflexi bacterium                       | hypothetical protein DRI81_05360 [Chloroflexi bacterium].                       | GCA_003648025.1 |
| RLC80321.1 | ZNR+NACHT+FGS*→ Four-helical-protein→ RVT→ SIG+SWC3→                                                                                                | ZNR+NACHT+FGS     | 945 | DRJ03_21950 | chloroflexi        | Chloroflexi bacterium                       | hypothetical protein DRJ03_21950 [Chloroflexi bacterium].                       | GCA_003648075.1 |
| RLC85952.1 | FGS*→  <-?<-?<-?<-TPR+TPR+TPR+TPR                                                                                                                   | FGS               | 288 | DRJ03_10225 | chloroflexi        | Chloroflexi bacterium                       | DNA-binding protein [Chloroflexi bacterium].                                    | GCA_003648075.1 |
| RLD03540.1 | NACHT+FGS*→ TIR+TCAD2→                                                                                                                              | NACHT+FGS         | 911 | DRI56_12305 | chloroflexi        | Chloroflexi bacterium                       | hypothetical protein DRI56_12305 [Chloroflexi bacterium].                       | GCA_003648195.1 |
| RLJ15771.1 | <-Cluster393_2clades<-Pentapeptide  ?→ TIR→ MoxR-AAA→  <-?  SIG+FGS*→  <-?<-PSE<-?<-Cluster187_2clades<-?<-HSP70<-?<-IES1                           | SIG+FGS           | 788 | DJ030_18040 | bacteria           | bacterium endosymbiont of Escarpia laminata | hypothetical protein DJ030_18040 [bacterium endosymbiont of Escarpia laminata]. | GCA_003660225.1 |

| acc        | operon                                                                                                                                   | architecture       | len  | gen.name    | taxend              | species                                               | define                                                                                             | gca             |
|------------|------------------------------------------------------------------------------------------------------------------------------------------|--------------------|------|-------------|---------------------|-------------------------------------------------------|----------------------------------------------------------------------------------------------------|-----------------|
| RLJ21529.1 | MalT→ Cluster440_2clades→ SIG+RFC-AAA→?→ SIG+TM+TM+TM+TM→ SIG+TM+HAMP→?→ drhyd+NACHT+FGS*→                                               | drhyd+NACHT+FGS    | 953  | DJ031_02685 | bacteria            | bacterium endosymbiont of Escarpia laminata           | hypothetical protein DJ031_02685 [bacterium endosymbiont of Escarpia laminata].                    | GCA_003660235.1 |
| RLJ22000.1 | SIG+FGS*→  <-?<-Cluster187_2clades<-?<-HSP70<-?<-IES1                                                                                    | SIG+FGS            | 788  | DJ031_01870 | bacteria            | bacterium endosymbiont of Escarpia laminata           | hypothetical protein DJ031_01870 [bacterium endosymbiont of Escarpia laminata].                    | GCA_003660235.1 |
| RLT41139.1 | NACHT+FGS*→ RVT→ Four-helical-protein→                                                                                                   | NACHT+FGS          | 1064 | DWI57_07410 | chloroflexi         | Chloroflexi bacterium                                 | NACHT domain-containing protein [Chloroflexi bacterium].                                           | GCA_003670625.1 |
| RLW71008.1 | TIR→ TIR+FGS→ SIG+FGS*→                                                                                                                  | SIG+FGS            | 146  | B6D71_04250 | gammaproteobacteria | gamma proteobacterium symbiont of Stewartia floridana | hypothetical protein B6D71_04250, partial [gamma proteobacterium symbiont of Stewartia floridana]. | GCA_003676185.1 |
| RME02281.1 | NACHT+FGS*→                                                                                                                              | NACHT+FGS          | 853  | D6816_11190 | bacteroidetes       | Bacteroidetes bacterium                               | NACHT domain-containing protein, partial [Bacteroidetes bacterium].                                | GCA_003694615.1 |
| RME06715.1 | FGS*→                                                                                                                                    | FGS                | 309  | D6816_07410 | bacteroidetes       | Bacteroidetes bacterium                               | hypothetical protein D6816_07410 [Bacteroidetes bacterium].                                        | GCA_003694615.1 |
| RME41053.1 | NACHT+FGS*→                                                                                                                              | NACHT+FGS          | 885  | D6796_16335 | chloroflexi         | Caldilineae bacterium                                 | NACHT domain-containing protein, partial [Caldilineae bacterium].                                  | GCA_003695385.1 |
| RMF51509.1 | TIR+FGS*→                                                                                                                                | TIR+FGS            | 471  | D6749_07615 | chloroflexi         | Chloroflexi bacterium                                 | TIR domain-containing protein [Chloroflexi bacterium].                                             | GCA_003695215.1 |
| RMF78466.1 | TIR+NACHT+TCAD10+TCAD10→ TIR+FGS*→                                                                                                       | TIR+FGS            | 519  | D6737_14645 | chloroflexi         | Chloroflexi bacterium                                 | TIR domain-containing protein [Chloroflexi bacterium].                                             | GCA_003695675.1 |
| RMG71792.1 | TIR→ EAD8+TIR+NACHT+FGS*→ FGS→                                                                                                           | EAD8+TIR+NACHT+FGS | 1095 | D6711_14505 | chloroflexi         | Chloroflexi bacterium                                 | TIR domain-containing protein [Chloroflexi bacterium].                                             | GCA_003696565.1 |
| RMG75601.1 | TIR+FGS*→                                                                                                                                | TIR+FGS            | 463  | D6711_06165 | chloroflexi         | Chloroflexi bacterium                                 | TIR domain-containing protein [Chloroflexi bacterium].                                             | GCA_003696565.1 |
| RMG81795.1 | TIR+FGS*→                                                                                                                                | TIR+FGS            | 524  | D6712_15685 | chloroflexi         | Chloroflexi bacterium                                 | TIR domain-containing protein [Chloroflexi bacterium].                                             | GCA_003696545.1 |
| RNC70126.1 | <-ABhydrolase+ABhydrolase+CASPASE+TPR-S<-TIR+APATPase<-? [DrHyd+nSTAND1+FGS*→ DrHyd+NACHT+FGS→  <-?  ?→?→?→ TRD+TRD→ SF2-DUF3427A+LPD33→ | DrHyd+nSTAND1+FGS  | 908  | ED859_06590 | deltaproteobacteria | Desulfuromonadales bacterium                          | DUF4062 domain-containing protein [Desulfuromonadales bacterium].                                  | GCA_003712145.1 |
| RPH58975.1 | NACHT+FGS*→                                                                                                                              | NACHT+FGS          | 477  | EHM81_09025 | chloroflexi         | Chloroflexi bacterium                                 | hypothetical protein EHM81_09025, partial [Chloroflexi bacterium].                                 | GCA_003818555.1 |
| RPI90984.1 | FGS*→                                                                                                                                    | FGS                | 257  | EHM40_16975 | chloroflexi         | Chloroflexi bacterium                                 | hypothetical protein EHM40_16975 [Chloroflexi bacterium].                                          | GCA_003820075.1 |
| RPJ19812.1 | NACHT+FGS*→                                                                                                                              | NACHT+FGS          | 400  | EHM35_20270 | planctomycetes      | Planctomycetaceae bacterium                           | hypothetical protein EHM35_20270 [Planctomycetaceae bacterium].                                    | GCA_003820145.1 |
| RPJ25004.1 | FGS*→                                                                                                                                    | FGS                | 258  | EHM33_15980 | chloroflexi         | Chloroflexi bacterium                                 | hypothetical protein EHM33_15980 [Chloroflexi bacterium].                                          | GCA_003820175.1 |
| RQW03777.1 | FGS*→ Four-helical-protein→ FGS→                                                                                                         | FGS                | 342  | EH223_08950 | bacteria            | candidate division KSB1 bacterium                     | formylglycine-generating enzyme family protein, partial [candidate division KSB1 bacterium].       | GCA_003854975.1 |





| acc            | operon                                                                                       | architecture      | len  | gen.name           | taxend              | species                                 | define                                                                             | gca             |
|----------------|----------------------------------------------------------------------------------------------|-------------------|------|--------------------|---------------------|-----------------------------------------|------------------------------------------------------------------------------------|-----------------|
| TVR20270.1     | DrHyd+nSTAND1+FGS*→                                                                          | DrHyd+nSTAND1+FGS | 925  | EA396_10895        | chloroflexi         | Anaerolineaceae bacterium               | hypothetical protein EA396_10895, partial [Anaerolineaceae bacterium].             | GCA_007693385.1 |
| TVR25455.1     | NACHT+FGS*→                                                                                  | NACHT+FGS         | 1003 | EA396_00070        | chloroflexi         | Anaerolineaceae bacterium               | TIR domain-containing protein [Anaerolineaceae bacterium].                         | GCA_007693385.1 |
| TVR58137.1     | <-SWC3<-FGS  ?→ NACHT+FGS*→                                                                  | NACHT+FGS         | 935  | EA420_17850        | gammaproteobacteria | Candidatus Competibacteraceae bacterium | NACHT domain-containing protein [Candidatus Competibacteraceae bacterium].         | GCA_007695245.1 |
| TVR58388.1     | TIR+bDLD3→ bDLD3+nSTAND1+FGS*→?→  <-NACHT+FGS                                                | bDLD3+nSTAND1+FGS | 802  | EA420_17215        | gammaproteobacteria | Candidatus Competibacteraceae bacterium | hypothetical protein EA420_17215 [Candidatus Competibacteraceae bacterium].        | GCA_007695245.1 |
| TXG93317.1     | TIR+BetaPropeller+BetaPropeller→ TIR+NACHT+FGS*→ TIR+NACHT→                                  | TIR+NACHT+FGS     | 974  | E6R15_09770        | betaproteobacteria  | Zoogloea sp.                            | TIR domain-containing protein [Zoogloea sp.].                                      | -               |
| TXH27877.1     | FGS*→  <-?<-?  ABhydrolase→                                                                  | FGS               | 242  | E6Q99_02970        | elusimicrobia       | Elusimicrobia bacterium                 | hypothetical protein E6Q99_02970, partial [Elusimicrobia bacterium].               | -               |
| TXI20020.1     | DrHyd+nSTAND1+FGS*→                                                                          | DrHyd+nSTAND1+FGS | 896  | E6Q62_02620        | betaproteobacteria  | Nitrosomonas sp.                        | DUF4062 domain-containing protein [Nitrosomonas sp.].                              | -               |
| VEN74385.1     | SIG+PTSIB-sorb→?→ NACHT+FGS→?→ KAP-NTPase+FGS→?→?→  <-?<-?<-?<-?  ?→ NACHT+FGS*→?→?→ MED26C→ | NACHT+FGS         | 898  | EPICR_30322        | deltaproteobacteria | uncultured Desulfobacteraceae bacterium | Signal transduction protein [uncultured Desulfobacteraceae bacterium].             | GCA_900659855.1 |
| VEN74387.1     | KAP-NTPase+FGS*→                                                                             | KAP-NTPase+FGS    | 669  | EPICR_30324        | deltaproteobacteria | uncultured Desulfobacteraceae bacterium | conserved hypothetical protein [uncultured Desulfobacteraceae bacterium].          | GCA_900659855.1 |
| VEN74395.1     | TM+NACHT+FGS*→                                                                               | TM+NACHT+FGS      | 1024 | EPICR_30332        | deltaproteobacteria | uncultured Desulfobacteraceae bacterium | hypothetical protein EPICR_30332 [uncultured Desulfobacteraceae bacterium].        | GCA_900659855.1 |
| WP_002710120.1 | TIR+NACHT→?→?→?→ FGS*→ ABhydrolase+ABhydrolase+CASPASE+TPR-S→                                | FGS               | 266  | THINI_RS24560      | gammaproteobacteria | Thiothrix nivea                         | SUMF1/EgtB/PvdO family nonheme iron enzyme [Thiothrix nivea].                      | GCF_000260135.1 |
| WP_006563305.1 | MED26C→?→?→?→?→?→?→ MNS-STAND+FGS*→ KAP-NTPase→                                              | MNS-STAND+FGS     | 646  | OSCT_RS18055       | chloroflexi         | Oscillochloris trichoides               | formylglycine-generating enzyme family protein [Oscillochloris trichoides].        | GCF_000152145.1 |
| WP_007042322.1 | DrHyd+nSTAND1+FGS*→  <-PSE<-NACHT+FGS                                                        | DrHyd+nSTAND1+FGS | 892  | THDR-DRAFT_RS24020 | gammaproteobacteria | Thiorhodococcus drewsii                 | SUMF1/EgtB/PvdO family nonheme iron enzyme [Thiorhodococcus drewsii].              | GCF_000224065.1 |
| WP_013032524.1 | TIR+bDLD3→ bDLD3+nSTAND1+FGS*→  <-?<-Four-helical-protein  RVT→                              | bDLD3+nSTAND1+FGS | 799  | NHAL_RS07270       | gammaproteobacteria | Nitrosococcus halophilus                | SUMF1/EgtB/PvdO family nonheme iron enzyme [Nitrosococcus halophilus].             | GCF_000024725.1 |
| WP_013964922.1 | SIG+CACHE+TM+PAS+PAS+GGDEF+EAL→?→?→?→?→ TIR+NACHT+FGS*→                                      | TIR+NACHT+FGS     | 954  | NIT79A3_RS03700    | betaproteobacteria  | Nitrosomonas sp. Is79A3                 | SUMF1/EgtB/PvdO family nonheme iron enzyme [Nitrosomonas sp. Is79A3].              | GCF_000219585.1 |
| WP_013967247.1 | DrHyd+nSTAND1+FGS*→                                                                          | DrHyd+nSTAND1+FGS | 932  | NIT79A3_RS16330    | betaproteobacteria  | Nitrosomonas sp. Is79A3                 | SUMF1/EgtB/PvdO family nonheme iron enzyme [Nitrosomonas sp. Is79A3].              | GCF_000219585.1 |
| WP_015766782.1 | <-CNMP+CRP-HTH  FAD-NAD-dep-oxidoreductase→?→  <-?<-?<-?<-?  nSTAND1+FGS*→  <-?<-ABHYDROLASE | nSTAND1+FGS       | 844  | CAP2UW1_RS11490    | betaproteobacteria  | Candidatus Accumulibacter phosphatis    | SUMF1/EgtB/PvdO family nonheme iron enzyme [Candidatus Accumulibacter phosphatis]. | GCF_000024165.1 |

| acc            | operon                                                                                | architecture          | len  | gen.name         | taxend              | species                              | define                                                                             | gca             |
|----------------|---------------------------------------------------------------------------------------|-----------------------|------|------------------|---------------------|--------------------------------------|------------------------------------------------------------------------------------|-----------------|
| WP_015766797.1 | EAD8+TIR+NACHT+FGS*→  <-RVT<-?<-EAD8+TIR+ABhydrolase                                  | EAD8+TIR+NACHT+FGS    | 1092 | CAP2UW1_RS23785  | betaproteobacteria  | Candidatus Accumulibacter phosphatis | SUMF1/EgtB/PvdO family nonheme iron enzyme [Candidatus Accumulibacter phosphatis]. | GCF_000024165.1 |
| WP_020502879.1 | NACHT+FGS*→                                                                           | NACHT+FGS             | 728  | -                | gammaproteobacteria | Lamprocystis purpurea                | SUMF1/EgtB/PvdO family nonheme iron enzyme [Lamprocystis purpurea].                | -               |
| WP_020504760.1 | EAD8+nSTAND1+FGS*→                                                                    | EAD8+nSTAND1+FGS      | 925  | A390_RS0111260   | gammaproteobacteria | Lamprocystis purpurea                | SUMF1/EgtB/PvdO family nonheme iron enzyme [Lamprocystis purpurea].                | GCF_000379525.1 |
| WP_026199145.1 | EAD8+nSTAND1+FGS*→  <-Trypsin+EAD8<-Trypco1                                           | EAD8+nSTAND1+FGS      | 868  | A390_RS36165     | gammaproteobacteria | Lamprocystis purpurea                | SUMF1/EgtB/PvdO family nonheme iron enzyme [Lamprocystis purpurea].                | GCF_000379525.1 |
| WP_026199412.1 | nSTAND1+FGS*→                                                                         | nSTAND1+FGS           | 833  | A390_RS0114350   | gammaproteobacteria | Lamprocystis purpurea                | SUMF1/EgtB/PvdO family nonheme iron enzyme [Lamprocystis purpurea].                | GCF_000379525.1 |
| WP_028314253.1 | Calcineurin+NACHT+FGS*→  <-MED26C                                                     | Calcineurin+NACHT+FGS | 1101 | G491_RS0108205   | deltaproteobacteria | Desulfatibacillum aliphaticivorans   | SUMF1/EgtB/PvdO family nonheme iron enzyme [Desulfatibacillum aliphaticivorans].   | GCF_000429905.1 |
| WP_028315860.1 | Calcineurin+NACHT+FGS*→                                                               | Calcineurin+NACHT+FGS | 1088 | G491_RS0120200   | deltaproteobacteria | Desulfatibacillum aliphaticivorans   | SUMF1/EgtB/PvdO family nonheme iron enzyme [Desulfatibacillum aliphaticivorans].   | GCF_000429905.1 |
| WP_046850450.1 | <-ADP_ribosyl_GH<-?<-?<-?  DrHyd+nSTAND1+FGS*→?→  <-nSTAND1<-?<-PSE<-SIG+nSTAND1<-TIR | DrHyd+nSTAND1+FGS     | 868  | AAW31_RS12305    | betaproteobacteria  | Nitrosomonas communis                | SUMF1/EgtB/PvdO family nonheme iron enzyme [Nitrosomonas communis].                | GCF_001007935.1 |
| WP_052347676.1 | nSTAND1+FGS*→                                                                         | nSTAND1+FGS           | 515  | D779_RS20855     | gammaproteobacteria | Imhoffiella purpurea                 | formylglycine-generating enzyme family protein [Imhoffiella purpurea].             | GCF_000585215.1 |
| WP_052515241.1 | KAP-NTPase+FGS*→ Four-helical-protein→ RVT→ Calcineurin+NACHT+FGS→                    | KAP-NTPase+FGS        | 689  | X474_RS14675     | deltaproteobacteria | Dethiosulfatarculus sandiegensis     | SUMF1/EgtB/PvdO family nonheme iron enzyme [Dethiosulfatarculus sandiegensis].     | GCF_000931935.2 |
| WP_054534535.1 | BACTERIALFRINGE→ BetaPropeller→  <-?  ?→?→ NACHT+FGS*→                                | NACHT+FGS             | 957  | SE18_RS11130     | chloroflexi         | Herpetosiphon geysericola            | SUMF1/EgtB/PvdO family nonheme iron enzyme [Herpetosiphon geysericola].            | GCF_001306135.1 |
| WP_058554345.1 | nSTAND1+FGS*→  <-SIG+CACHE+TM+PAS+PAS+GGDEF+EAL  ?→  <-?  SIR2→                       | nSTAND1+FGS           | 820  | ML01_RS05180     | gammaproteobacteria | Thiohalocapsa sp. ML1                | SUMF1/EgtB/PvdO family nonheme iron enzyme [Thiohalocapsa sp. ML1].                | GCF_001469165.1 |
| WP_058554420.1 | TIR→ MoxR-AAA→ MED26C→ FGS*→?→  <-?<-FGS  ?→?→ TIR→ EAD1+fvmYukDl-Nterm→              | FGS                   | 857  | ML01_RS05595     | gammaproteobacteria | Thiohalocapsa sp. ML1                | SUMF1/EgtB/PvdO family nonheme iron enzyme [Thiohalocapsa sp. ML1].                | GCF_001469165.1 |
| WP_058557121.1 | EAD8→ EAD8+nSTAND1+FGS*→?→?→ RVT→                                                     | EAD8+nSTAND1+FGS      | 964  | ML01_RS19795     | gammaproteobacteria | Thiohalocapsa sp. ML1                | SUMF1/EgtB/PvdO family nonheme iron enzyme [Thiohalocapsa sp. ML1].                | GCF_001469165.1 |
| WP_073644744.1 | TIR+nSTAND1+FGS*→  <-EAD1+FGS<-EAD1+Trypsin                                           | TIR+nSTAND1+FGS       | 931  | FACHB389_RS31975 | cyanobacteria       | Nostoc calcicola                     | SUMF1/EgtB/PvdO family nonheme iron enzyme [Nostoc calcicola].                     | GCF_001904715.1 |
| WP_074904186.1 | TIR+bDLD3→ bDLD3+nSTAND1+FGS*→  <-NACHT+FGS<-ABhydrolase+bDLD3                        | bDLD3+nSTAND1+FGS     | 823  | BM122_RS04980    | betaproteobacteria  | Nitrosomonas communis                | SUMF1/EgtB/PvdO family nonheme iron enzyme [Nitrosomonas communis].                | GCF_900114745.1 |

| acc            | operon                                                                                                      | architecture          | len  | gen.name        | taxend                          | species                             | define                                                                               | gca             |
|----------------|-------------------------------------------------------------------------------------------------------------|-----------------------|------|-----------------|---------------------------------|-------------------------------------|--------------------------------------------------------------------------------------|-----------------|
| WP_074906405.1 | <-ADP_ribosyl_GH<-?<-?<-?  DrHyd+nSTAND1+FGS*→ FGS→ PSE→?→  <-?<-?<-?<-SWC3                                 | DrHyd+nSTAND1+FGS     | 824  | BM122_RS14970   | betaproteobacteria              | Nitrosomonas communis               | SUMF1/EgtB/PvdO family nonheme iron enzyme [Nitrosomonas communis].                  | GCF_900114745.1 |
| WP_078922991.1 | TIR+NACHT+FGS*→                                                                                             | TIR+NACHT+FGS         | 961  | B5D50_RS12585   | gammaproteobacteria             | Thiothrix eikelboomii               | SUMF1/EgtB/PvdO family nonheme iron enzyme [Thiothrix eikelboomii].                  | GCF_900167255.1 |
| WP_081485890.1 | FGS*→                                                                                                       | FGS                   | 285  | -               | gammaproteobacteria             | Thiothrix nivea                     | SUMF1/EgtB/PvdO family nonheme iron enzyme [Thiothrix nivea].                        | -               |
| WP_083884749.1 | <-ABhydrolase<-?<-?<-?<-?  TIR+nSTAND1+FGS*→  <-RVT<-SIG+SWC3<-FGS<-TIR+nSTAND1+FGS                         | TIR+nSTAND1+FGS       | 974  | THIMO_RS13755   | gammaproteobacteria             | Thioflavicoccus mobilis             | SUMF1/EgtB/PvdO family nonheme iron enzyme [Thioflavicoccus mobilis].                | GCF_000327045.1 |
| WP_084511416.1 | Calcineurin+NACHT+FGS*→                                                                                     | Calcineurin+NACHT+FGS | 1109 | -               | deltaproteobacteria             | Desulfatibacillum aliphaticivorans  | SUMF1/EgtB/PvdO family nonheme iron enzyme [Desulfatibacillum aliphaticivorans].     | -               |
| WP_088618636.1 | DrHyd+NACHT+FGS*→?→  <-FGS<-?  ?→  <-RADICAL-SAM                                                            | DrHyd+NACHT+FGS       | 1016 | CEK71_RS06560   | gammaproteobacteria             | Methylovulum psychrotolerans        | SUMF1/EgtB/PvdO family nonheme iron enzyme [Methylovulum psychrotolerans].           | GCF_002209385.1 |
| WP_089718394.1 | TIR+bDLD3→ bDLD3+nSTAND1+FGS*→                                                                              | bDLD3+nSTAND1+FGS     | 798  | FLV43_RS07510   | nitrospinae/tectomicrobia group | Candidatus Entotheonella palauensis | SUMF1/EgtB/PvdO family nonheme iron enzyme [Candidatus Entotheonella palauensis].    | GCF_900079105.1 |
| WP_089936193.1 | ABC-ATPase→ ABC-ATPase→ drhyd+nSTAND1+FGS*→                                                                 | drhyd+nSTAND1+FGS     | 929  | FLV42_RS11295   | nitrospinae/tectomicrobia group | Candidatus Entotheonella palauensis | SUMF1/EgtB/PvdO family nonheme iron enzyme [Candidatus Entotheonella palauensis].    | GCF_900079095.1 |
| WP_090322194.1 | DrHyd→ nSTAND1→ FGS*→                                                                                       | FGS                   | 263  | BM41_RS13900    | betaproteobacteria              | Nitrosomonas oligotropha            | formylglycine-generating enzyme family protein [Nitrosomonas oligotropha].           | GCF_900106555.1 |
| WP_090742272.1 | DrHyd+nSTAND1+FGS*→                                                                                         | DrHyd+nSTAND1+FGS     | 914  | COMA1_RS00565   | nitrospirae                     | Candidatus Nitrospira nitrosa       | SUMF1/EgtB/PvdO family nonheme iron enzyme [Candidatus Nitrospira nitrosa].          | GCF_001458735.1 |
| WP_095042164.1 | NACHT+FGS*→                                                                                                 | NACHT+FGS             | 1092 | CFX0092_RS03310 | chloroflexi                     | Candidatus Promineofilum breve      | SUMF1/EgtB/PvdO family nonheme iron enzyme [Candidatus Promineofilum breve].         | GCF_900066015.1 |
| WP_095043336.1 | <-MED26C  ?→?→  <-?<-?  EAD7+TIR+FGS*→  <-ABhydrolase  ?→ Cluster455_2clades→  <-ABhydrolase<-?  ?→ MED26C→ | EAD7+TIR+FGS          | 604  | CFX0092_RS09700 | chloroflexi                     | Candidatus Promineofilum breve      | SUMF1/EgtB/PvdO family nonheme iron enzyme [Candidatus Promineofilum breve].         | GCF_900066015.1 |
| WP_097644514.1 | CASPASE+EAD2→ EAD2→?→ MoxR-AAA→ SIG+VWA→ vWA-L+MNS-STAND+FGS*→                                              | vWA-L+MNS-STAND+FGS   | 917  | CJ255_RS12915   | chloroflexi                     | Candidatus Viridilinea mediisalina  | SUMF1/EgtB/PvdO family nonheme iron enzyme [Candidatus Viridilinea mediisalina].     | GCF_002532535.1 |
| WP_097646022.1 | MNS-STAND+FGS→  <-?<-?  FGS→                                                                                | MNS-STAND+FGS         | 331  | CJ255_RS20935   | chloroflexi                     | Candidatus Viridilinea mediisalina  | formylglycine-generating enzyme family protein [Candidatus Viridilinea mediisalina]. | GCF_002532535.1 |

| acc            | operon                                                                                                                                                   | architecture        | len  | gen.name                | taxend                      | species                             | define                                                                            | gca             |
|----------------|----------------------------------------------------------------------------------------------------------------------------------------------------------|---------------------|------|-------------------------|-----------------------------|-------------------------------------|-----------------------------------------------------------------------------------|-----------------|
| WP_097646178.1 | FGS*→                                                                                                                                                    | FGS                 | 273  | CJ255_RS21825           | chloroflexi                 | Candidatus Viridilinea mediisalina  | SUMF1/EgtB/PvdO family nonheme iron enzyme [Candidatus Viridilinea mediisalina].  | GCF_002532535.1 |
| WP_097650659.1 | MNS-STAND+FGS*→ KAP-NTPase→                                                                                                                              | MNS-STAND+FGS       | 798  | A9Q02_RS01775           | chloroflexi                 | Candidatus Chloroploca asiatica     | SUMF1/EgtB/PvdO family nonheme iron enzyme [Candidatus Chloroploca asiatica].     | GCF_002532075.1 |
| WP_097650736.1 | MNS-STAND+FGS*→ KAP-NTPase→                                                                                                                              | MNS-STAND+FGS       | 677  | A9Q02_RS02220           | chloroflexi                 | Candidatus Chloroploca asiatica     | SUMF1/EgtB/PvdO family nonheme iron enzyme [Candidatus Chloroploca asiatica].     | GCF_002532075.1 |
| WP_097651198.1 | Eukglutathioneyn-ATPgrasp→?→?→  <-?<-?<-?<-?  MNS-STAND+FGS*→ EAD2→  <-?  ABhydrolase→                                                                   | MNS-STAND+FGS       | 748  | A9Q02_RS04675           | chloroflexi                 | Candidatus Chloroploca asiatica     | SUMF1/EgtB/PvdO family nonheme iron enzyme [Candidatus Chloroploca asiatica].     | GCF_002532075.1 |
| WP_100918361.1 | nSTAND1+FGS*→                                                                                                                                            | nSTAND1+FGS         | 825  | THSYN_RS06160           | gammaproteobacteria         | Candidatus Thiodictyon syntrophicum | SUMF1/EgtB/PvdO family nonheme iron enzyme [Candidatus Thiodictyon syntrophicum]. | GCF_002813775.1 |
| WP_100921702.1 | <-HSP70<-?<-?  ?→ SbcC+SbcC→?→?→  <-?  PSE→ FGS→  <-SIG+SWC3<-TIR+FGS<-TIR<-FURR-HTH                                                                     | FGS                 | 290  | THSYN_RS26100           | gammaproteobacteria         | Candidatus Thiodictyon syntrophicum | SUMF1/EgtB/PvdO family nonheme iron enzyme [Candidatus Thiodictyon syntrophicum]. | GCF_002813775.1 |
| WP_100921704.1 | TIR+FGS*→                                                                                                                                                | TIR+FGS             | 408  | THSYN_RS26110           | gammaproteobacteria         | Candidatus Thiodictyon syntrophicum | SUMF1/EgtB/PvdO family nonheme iron enzyme [Candidatus Thiodictyon syntrophicum]. | GCF_002813775.1 |
| WP_103975510.1 | SIG+drhyd+NACHT+FGS*→?→?→?→ SIG+TM+TM+TM→                                                                                                                | SIG+drhyd+NACHT+FGS | 920  | AADEFJLK_RS19975        | gammaproteobacteria         | Methylovulum psychrotolerans        | SUMF1/EgtB/PvdO family nonheme iron enzyme [Methylovulum psychrotolerans].        | GCF_002923755.1 |
| WP_106247884.1 | DrHyd+nSTAND1+FGS*→                                                                                                                                      | DrHyd+nSTAND1+FGS   | 937  | bacteria>actinobacteria | Allonocardiopsis opalescens | -                                   | 1361040121                                                                        | -               |
| WP_107803916.1 | DrHyd+nSTAND1→ SIG+FGS*→                                                                                                                                 | SIG+FGS             | 232  | C8R26_RS11925           | betaproteobacteria          | Nitrosomonas oligotropha            | SUMF1/EgtB/PvdO family nonheme iron enzyme [Nitrosomonas oligotropha].            | GCF_003050805.1 |
| WP_109821479.1 | SIG+CACHE+TM+PAS+PAS+GGDEF+EAL→  <-?  ?→?→?→?→ TIR+NACHT+FGS*→  <-?  ?→  <-?<-?  GNTR-HTH→                                                               | TIR+NACHT+FGS       | 932  | DKT75_RS00505           | gammaproteobacteria         | Leucothrix arctica                  | SUMF1/EgtB/PvdO family nonheme iron enzyme [Leucothrix arctica].                  | GCF_003172895.1 |
| WP_109838176.1 | <-SIG+CACHE+TM+PAS+PAS+GGDEF+EAL<-SIG+CACHE+TM+PAS+PAS+GGDEF+EAL<-?  TIR+NACHT+FGS→  <-RVT  Four-helical-protein→  <-?<-TIR+NACHT+FGS<-?  ?→  <-?  SWC3→ | TIR+NACHT+FGS       | 935  | DKW60_RS13450           | gammaproteobacteria         | Leucothrix pacifica                 | SUMF1/EgtB/PvdO family nonheme iron enzyme [Leucothrix pacifica].                 | GCF_003172875.1 |
| WP_109838180.1 | TIR+NACHT+FGS*→                                                                                                                                          | TIR+NACHT+FGS       | 1009 | DKW60_RS13470           | gammaproteobacteria         | Leucothrix pacifica                 | SUMF1/EgtB/PvdO family nonheme iron enzyme [Leucothrix pacifica].                 | GCF_003172875.1 |
| WP_113718124.1 | CASPASE+FGS*→                                                                                                                                            | CASPASE+FGS         | 581  | bacteria>actinobacteria | Arthrobacter dokdonellae    | -                                   | 1428153431                                                                        | -               |
| WP_117400917.1 | <-TIMbarrel  ?→?→?→ EAD8+Trypsin→ DADA-Ligase→ EAD2+NACHT+FGS*→                                                                                          | EAD2+NACHT+FGS      | 982  | DOT12_RS19005           | actinobacteria              | Actinomadura sp. LHW52907           | SUMF1/EgtB/PvdO family nonheme iron enzyme [Actinomadura sp. LHW52907].           | GCF_003432485.1 |

| acc            | operon                                                                                                                                                          | architecture          | len  | gen.name             | taxend                          | species                            | define                                                                                        | gca             |
|----------------|-----------------------------------------------------------------------------------------------------------------------------------------------------------------|-----------------------|------|----------------------|---------------------------------|------------------------------------|-----------------------------------------------------------------------------------------------|-----------------|
| WP_120798715.1 | TIR+nSTAND1+FGS*→                                                                                                                                               | TIR+nSTAND1+FGS       | 943  | -                    | gammaproteobacteria             | Thiocapsa rosea                    | SUMF1/EgtB/PvdO family nonheme iron enzyme [Thiocapsa rosea].                                 | -               |
| WP_120798722.1 | TIR+nSTAND1+FGS→ PSE→?→ TIR+TCAD2→ ABhydrolase+ABhydrolase+CASPASE+TPR-S→ TIR→ MoxR-AAA→ MED26C→ vWA-L+TIR+FGS→  <-DrHyd<-TM+TM+TM+TM+TM+TM+TM-<-TIR+LDcluster2 | TIR+nSTAND1+FGS       | 887  | BDD21_RS20395        | gammaproteobacteria             | Thiocapsa rosea                    | SUMF1/EgtB/PvdO family nonheme iron enzyme [Thiocapsa rosea].                                 | GCF_003634315.1 |
| WP_121435660.1 | <-TIMbarrel  ?→?→?→ EAD8+Trypsin→ DADA-Ligase→ NACHT+FGS*→                                                                                                      | NACHT+FGS             | 978  | BZB76_RS18480        | actinobacteria                  | Actinomadura pelletieri            | SUMF1/EgtB/PvdO family nonheme iron enzyme [Actinomadura pelletieri].                         | GCF_003634705.1 |
| WP_124681989.1 | MNS-STAND+FGS*→                                                                                                                                                 | MNS-STAND+FGS         | 639  | CJ255_RS17220        | chloroflexi                     | Candidatus Viridilinea mediisalina | formylglycine-generating enzyme family protein [Candidatus Viridilinea mediisalina].          | GCF_002532535.1 |
| WP_129630085.1 | MNS-STAND+FGS*→ KAP-NTPase→  <-?  ?→ FAD-NAD-dep-oxidoreductase→                                                                                                | MNS-STAND+FGS         | 723  | EKD03_RS09875        | chloroflexi                     | Candidatus Oscillochloris fontis   | SUMF1/EgtB/PvdO family nonheme iron enzyme [Candidatus Oscillochloris fontis].                | GCF_004138135.1 |
| WP_129675764.1 | <-EAD2+CASPASE  CASPASE+EAD2→?→?→ EAD2+iSTAND→ MoxR-AAA→ SIG+VWA→ vWA-L+MNS-STAND+FGS*→  <-?  EAD2+SAVED→                                                       | vWA-L+MNS-STAND+FGS   | 910  | EKD05_RS18730        | chloroflexi                     | Candidatus Chloroploca sp. Khr17   | SUMF1/EgtB/PvdO family nonheme iron enzyme [Candidatus Chloroploca sp. Khr17].                | GCF_004138165.1 |
| WP_129676117.1 | <-ABC-ATPase<-?  ?→  <-?<-?<-SIG+HISKIN+REC<-?  MNS-STAND+FGS*→                                                                                                 | MNS-STAND+FGS         | 771  | EKD05_RS19365        | chloroflexi                     | Candidatus Chloroploca sp. Khr17   | SUMF1/EgtB/PvdO family nonheme iron enzyme [Candidatus Chloroploca sp. Khr17].                | GCF_004138165.1 |
| WP_129680571.1 | TIR+NACHT+FGS*→  <-?<-?<-?<-TM+TM+TM+TM+TM+TM+TM+TM-<-?  SIG+TM+HAMP+HISKIN→                                                                                    | TIR+NACHT+FGS         | 1113 | EKD04_RS05935        | chloroflexi                     | Chloroflexales bacterium ZM16-3    | SUMF1/EgtB/PvdO family nonheme iron enzyme [Chloroflexales bacterium ZM16-3].                 | GCF_004138175.2 |
| WP_129682868.1 | ABhydrolase→  <-?  ?→ CNMP+CRP-HTH→?→ Pkinase+FHA→?→ Pkinase+FHA+TM+TM+FGS*→                                                                                    | Pkinase+FHA+TM+TM+FGS | 994  | EKD04_RS11830        | chloroflexi                     | Chloroflexales bacterium ZM16-3    | SUMF1/EgtB/PvdO family nonheme iron enzyme [Chloroflexales bacterium ZM16-3].                 | GCF_004138175.2 |
| WP_133117020.1 | MNS-STAND+FGS*→                                                                                                                                                 | MNS-STAND+FGS         | 468  | CJ255_RS20920        | chloroflexi                     | Candidatus Viridilinea mediisalina | formylglycine-generating enzyme family protein, partial [Candidatus Viridilinea mediisalina]. | GCF_002532535.1 |
| WP_135477535.1 | MNS-STAND+FGS*→ KAP-NTPase→                                                                                                                                     | MNS-STAND+FGS         | 671  | EYB53_RS07210        | chloroflexi                     | Candidatus Chloroploca sp. M-50    | SUMF1/EgtB/PvdO family nonheme iron enzyme [Candidatus Chloroploca sp. M-50].                 | GCF_004762035.1 |
| WP_135478271.1 | MNS-STAND+FGS→?→?→ MNS-STAND+FGS→ KAP-NTPase→                                                                                                                   | MNS-STAND+FGS         | 749  | EYB53_RS11155        | chloroflexi                     | Candidatus Chloroploca sp. M-50    | SUMF1/EgtB/PvdO family nonheme iron enzyme [Candidatus Chloroploca sp. M-50].                 | GCF_004762035.1 |
| WP_135478274.1 | MNS-STAND+EAD9+FGS*→                                                                                                                                            | MNS-STAND+EAD9+FGS    | 726  | bacteria>chloroflexi | Candidatus Chloroploca sp. M-50 | -                                  | 1610950059                                                                                    | -               |
| WP_135480949.1 | <-CASPASE<-EAD2  CASPASE+EAD2→ EAD2+iSTAND→ MoxR-AAA→ SIG+VWA→ vWA-L+MNS-STAND+FGS*→  <-?  EAD2+SAVED→  <-?  ?→  <-?<-?<-SIG+TM+HAMP+HISKIN                     | vWA-L+MNS-STAND+FGS   | 865  | EYB53_RS21460        | chloroflexi                     | Candidatus Chloroploca sp. M-50    | SUMF1/EgtB/PvdO family nonheme iron enzyme [Candidatus Chloroploca sp. M-50].                 | GCF_004762035.1 |

| acc            | operon                                                                                         | architecture          | len  | gen.name             | taxend                          | species                              | define                                                                                 | gca             |
|----------------|------------------------------------------------------------------------------------------------|-----------------------|------|----------------------|---------------------------------|--------------------------------------|----------------------------------------------------------------------------------------|-----------------|
| WP_135481914.1 | FGS*→                                                                                          | FGS                   | 498  | bacteria>chloroflexi | Candidatus Chloroploca sp. M-50 | -                                    | 1610955746                                                                             | -               |
| WP_138678219.1 | NACHT+FGS*→  <-DrHyd+NACHT+FGS<-?  ?→?→?→ MoxR-AAA→                                            | NACHT+FGS             | 959  | ACCUM_RS11740        | betaproteobacteria              | Candidatus Accumulibacter phosphatis | SUMF1/EgtB/PvdO family nonheme iron enzyme [Candidatus Accumulibacter phosphatis].     | GCF_005889575.1 |
| WP_138678880.1 | FGS*→                                                                                          | FGS                   | 336  | -                    | betaproteobacteria              | Candidatus Accumulibacter phosphatis | SUMF1/EgtB/PvdO family nonheme iron enzyme [Candidatus Accumulibacter phosphatis].     | -               |
| WP_138678883.1 | nSTAND1+TM+TPR+TPR→  <-?  SIG+SWC3→?→ FGS→  <-RVT  Four-helical-protein→  <-?<-FGS<-MED26C     | FGS                   | 785  | ACCUM_RS18245        | betaproteobacteria              | Candidatus Accumulibacter phosphatis | SUMF1/EgtB/PvdO family nonheme iron enzyme [Candidatus Accumulibacter phosphatis].     | GCF_005889575.1 |
| WP_138679000.1 | SIG+drhyd→ FGS*→                                                                               | FGS                   | 273  | ACCUM_RS19505        | betaproteobacteria              | Candidatus Accumulibacter phosphatis | SUMF1/EgtB/PvdO family nonheme iron enzyme [Candidatus Accumulibacter phosphatis].     | GCF_005889575.1 |
| WP_141354765.1 | TIR+nSTAND1+FGS*→                                                                              | TIR+nSTAND1+FGS       | 1034 | -                    | betaproteobacteria              | Zoogloea ramigera                    | SUMF1/EgtB/PvdO family nonheme iron enzyme [Zoogloea ramigera].                        | -               |
| WP_141354768.1 | TIR+NACHT+FGS→  <-DrHyd  TM+TM+TM+TM+TM+TM→  <-TIR+nSTAND1+FGS                                 | TIR+NACHT+FGS         | 1005 | ZRA01_RS18100        | betaproteobacteria              | Zoogloea ramigera                    | SUMF1/EgtB/PvdO family nonheme iron enzyme [Zoogloea ramigera].                        | GCF_006539865.1 |
| WP_141508656.1 | FGS*→                                                                                          | FGS                   | 438  | A9Q02_RS01600        | chloroflexi                     | Candidatus Chloroploca asiatica      | SUMF1/EgtB/PvdO family nonheme iron enzyme, partial [Candidatus Chloroploca asiatica]. | GCF_002532075.1 |
| WP_144412951.1 | <-ADP_ribosyl_GH<-?<-?<-?  PSE→ nSTAND1+FGS*→?→  <-nSTAND1<-PSE<-SIG+nSTAND1<-TIR              | nSTAND1+FGS           | 811  | BCL69_RS09525        | betaproteobacteria              | Nitrosomonas communis                | SUMF1/EgtB/PvdO family nonheme iron enzyme [Nitrosomonas communis].                    | GCF_008124795.1 |
| WP_155247659.1 | Trypco1→ SIG+Trypsin+NACHT+FGS*→                                                               | SIG+Trypsin+NACHT+FGS | 1057 | K382_RS0113985       | gammaproteobacteria             | Teredinibacter turnerae              | SUMF1/EgtB/PvdO family nonheme iron enzyme [Teredinibacter turnerae].                  | GCF_000426805.1 |
| WP_155312115.1 | NACHT+FGS→ Calcineurin+NACHT+FGS→?→?→ NACHT+FGS→?→ PSE→?→ NACHT+FGS*→?→  <-?  ?→?→ ABC-ATPase→ | NACHT+FGS             | 527  | GN112_RS21635        | deltaproteobacteria             | Desulfosarcina ovata                 | SUMF1/EgtB/PvdO family nonheme iron enzyme [Desulfosarcina ovata].                     | GCF_009689005.1 |
| WP_155342158.1 | DrHyd+nSTAND1+FGS*→                                                                            | DrHyd+nSTAND1+FGS     | 889  | Acor_RS41020         | actinobacteria                  | Acrocarpospora corrugata             | SUMF1/EgtB/PvdO family nonheme iron enzyme, partial [Acrocarpospora corrugata].        | GCF_009687845.1 |
| WP_156427941.1 | NACHT+FGS*→                                                                                    | NACHT+FGS             | 859  | ML01_RS23445         | gammaproteobacteria             | Thiohalocapsa sp. ML1                | SUMF1/EgtB/PvdO family nonheme iron enzyme, partial [Thiohalocapsa sp. ML1].           | GCF_001469165.1 |
| WP_156428023.1 | NACHT+FGS*→                                                                                    | NACHT+FGS             | 942  | ML01_RS26210         | gammaproteobacteria             | Thiohalocapsa sp. ML1                | SUMF1/EgtB/PvdO family nonheme iron enzyme, partial [Thiohalocapsa sp. ML1].           | GCF_001469165.1 |
| WP_157468427.1 | Calcineurin+NACHT+FGS*→                                                                        | Calcineurin+NACHT+FGS | 1121 | -                    | deltaproteobacteria             | Desulfatibacillum aliphaticivorans   | SUMF1/EgtB/PvdO family nonheme iron enzyme [Desulfatibacillum aliphaticivorans].       | -               |



| acc            | operon                                                                                                   | architecture      | len | gen.name      | taxend              | species                              | define                                                                             | gca             |
|----------------|----------------------------------------------------------------------------------------------------------|-------------------|-----|---------------|---------------------|--------------------------------------|------------------------------------------------------------------------------------|-----------------|
| WP_169067800.1 | FGS*→                                                                                                    | FGS               | 808 | E4Q23_RS17325 | betaproteobacteria  | Candidatus Accumulibacter phosphatis | SUMF1/EgtB/PvdO family nonheme iron enzyme [Candidatus Accumulibacter phosphatis]. | GCF_012939955.1 |
| WP_169070388.1 | FGS*→  <-TRANSGlutaminase  ?→  <-?  PSE→?→  <-Patatin                                                    | FGS               | 242 | E4Q08_RS10725 | betaproteobacteria  | Candidatus Accumulibacter phosphatis | SUMF1/EgtB/PvdO family nonheme iron enzyme [Candidatus Accumulibacter phosphatis]. | GCF_012940005.1 |
| WP_169071960.1 | ABC-ATPase→?→?→ SIG+FGS→  <-Four-helical-protein  RVT→  <-SIG+FGS<-MED26C<-MoxR-AAA<-TIR                 | SIG+FGS           | 194 | E4Q08_RS22030 | betaproteobacteria  | Candidatus Accumulibacter phosphatis | SUMF1/EgtB/PvdO family nonheme iron enzyme [Candidatus Accumulibacter phosphatis]. | GCF_012940005.1 |
| WP_169071963.1 | FGS*→                                                                                                    | FGS               | 825 | E4Q08_RS22045 | betaproteobacteria  | Candidatus Accumulibacter phosphatis | SUMF1/EgtB/PvdO family nonheme iron enzyme [Candidatus Accumulibacter phosphatis]. | GCF_012940005.1 |
| WP_169071986.1 | <-BLBD<-?  ?→?→  <-?<-PSE<-?<-?  TIR+nSTAND1+FGS*→ FGS→  <-Four-helical-protein  RVT→  <-TIR+FGS<-?<-RVT | TIR+nSTAND1+FGS   | 934 | E4Q08_RS22180 | betaproteobacteria  | Candidatus Accumulibacter phosphatis | SUMF1/EgtB/PvdO family nonheme iron enzyme [Candidatus Accumulibacter phosphatis]. | GCF_012940005.1 |
| WP_170141027.1 | DrHyd+nSTAND1+FGS*→                                                                                      | DrHyd+nSTAND1+FGS | 920 | CLV72_RS18670 | actinobacteria      | Allonocardiopsis opalescens          | SUMF1/EgtB/PvdO family nonheme iron enzyme [Allonocardiopsis opalescens].          | GCF_003002095.1 |
| WP_170164843.1 | TIR+nSTAND1+FGS*→                                                                                        | TIR+nSTAND1+FGS   | 939 | BDD21_RS20355 | gammaproteobacteria | Thiocapsa rosea                      | SUMF1/EgtB/PvdO family nonheme iron enzyme [Thiocapsa rosea].                      | GCF_003634315.1 |
| WP_170183022.1 | TIR+nSTAND1+FGS*→                                                                                        | TIR+nSTAND1+FGS   | 893 | ZRA01_RS18085 | betaproteobacteria  | Zoogloea ramigera                    | SUMF1/EgtB/PvdO family nonheme iron enzyme [Zoogloea ramigera].                    | GCF_006539865.1 |
| WP_171047426.1 | FGS*→                                                                                                    | FGS               | 233 | ACCUM_RS18225 | betaproteobacteria  | Candidatus Accumulibacter phosphatis | SUMF1/EgtB/PvdO family nonheme iron enzyme [Candidatus Accumulibacter phosphatis]. | GCF_005889575.1 |

6. Source data. Gene neighborhoods and domain architectures of the bacterial and prophage/phage SPRY domain

| acc          | operon                                                                                                                            | architecture | len | gen.name    | taxend              | species                              | define                                                                         | gca             |
|--------------|-----------------------------------------------------------------------------------------------------------------------------------|--------------|-----|-------------|---------------------|--------------------------------------|--------------------------------------------------------------------------------|-----------------|
| ACF52192.1   | Phage_connect_1→ Phage_H_T_join→ HK97-gp10_like→ DUF3168→ Phage_TTP_11→ Phage_TAC_13→?→ SPRY+X*→?→ Phage-tail-tape→               | SPRY+X       | 655 | Smal_2491   | Gammaproteobacteria | Stenotrophomonas maltophilia R551-3  | hypothetical protein Smal_2491 [Stenotrophomonas maltophilia R551-3].          | GCA_000020665.1 |
| ASA22786.1   | SUN→ SPRY+SUN*→ SUN→ Laminin_G_3→ Disaggr_repeat→ Phage_holin_4_1→                                                                | SPRY+SUN     | 358 | B9T62_19455 | Firmicutes          | Paenibacillus donghaensis            | hypothetical protein B9T62_19455 [Paenibacillus donghaensis].                  | GCA_002192415.1 |
| CAA2107092.1 | TM+PhageMin_Tail→?→?→?→?→ SPRY*→                                                                                                  | SPRY         | 456 | VVAX_04063  | Betaproteobacteria  | Variovorax paradoxus                 | hypothetical protein VVAX_04063 [Variovorax paradoxus].                        | -               |
| CAA2108205.1 | TM+PhageMin_Tail→?→?→?→?→ SPRY*→                                                                                                  | SPRY         | 455 | VVAX_04716  | Betaproteobacteria  | Variovorax paradoxus                 | hypothetical protein VVAX_04716 [Variovorax paradoxus].                        | -               |
| EJP76868.1   | Phage_connect_1→ Phage_H_T_join→ HK97-gp10_like→ DUF3168→ Phage_TTP_11→ Phage_TAC_13→?→ SPRY+X*→?→ Phage-tail-tape→ ConA-repeats→ | SPRY+X       | 658 | A1OC_01671  | Gammaproteobacteria | Stenotrophomonas maltophilia Ab55555 | hypothetical protein A1OC_01671 [Stenotrophomonas maltophilia Ab55555].        | GCA_000287935.1 |
| HAG44903.1   | SPRY*→ SPRY→ SUN→                                                                                                                 | SPRY         | 249 | DCL31_18225 | Firmicutes          | Clostridium sp.                      | TPA: hypothetical protein DCL31_18225 [Clostridium sp.].                       | GCA_003451415.1 |
| HAU79614.1   | Phage_H_T_join→ HK97-gp10_like→ DUF3168→ Phage_TTP_11→ Phage_TAC_13→?→ SPRY+X*→  <?  ?→?→?→ Phage-tail-tape→                      | SPRY+X       | 655 | DCW96_02920 | Gammaproteobacteria | Stenotrophomonas sp.                 | TPA: hypothetical protein DCW96_02920 [Stenotrophomonas sp.].                  | GCA_003484865.1 |
| HBC50726.1   | Phage_connect_1→ Phage_H_T_join→ HK97-gp10_like→ DUF3168→ Phage_TTP_11→ Phage_TAC_13→?→ SPRY*→                                    | SPRY         | 169 | DC051_05805 | Gammaproteobacteria | Stenotrophomonas maltophilia         | TPA: hypothetical protein DC051_05805, partial [Stenotrophomonas maltophilia]. | GCA_003487985.1 |
| HBJ00556.1   | SPRY*→ SUN→                                                                                                                       | SPRY         | 221 | DDY89_06200 | Firmicutes          | Lysinibacillus sp.                   | TPA: hypothetical protein DDY89_06200, partial [Lysinibacillus sp.].           | GCA_003507435.1 |
| HBJ00935.1   | SPRY*→                                                                                                                            | SPRY         | 146 | DDY89_08865 | Firmicutes          | Lysinibacillus sp.                   | TPA: hypothetical protein DDY89_08865, partial [Lysinibacillus sp.].           | GCA_003507435.1 |

| acc          | operon                                                                                                                            | architecture | len  | gen.name        | taxend                | species                                         | define                                                                                    | gca             |
|--------------|-----------------------------------------------------------------------------------------------------------------------------------|--------------|------|-----------------|-----------------------|-------------------------------------------------|-------------------------------------------------------------------------------------------|-----------------|
| HBS54551.1   | Phage_connect_1→ Phage_H_T_join→ HK97-gp10_like→ DUF3168→ Phage_TTP_11→ Phage_TAC_13→?→ SPRY+X*→?→ Phage-tail-tape→ ConA-repeats→ | SPRY+X       | 655  | DEA38_02315     | Gammaproteobacteria   | Stenotrophomonas sp.                            | TPA: hypothetical protein DEA38_02315 [Stenotrophomonas sp.].                             | GCA_003510825.1 |
| HBT70779.1   | DISCOIDIN→ SUN→ SPRY*→                                                                                                            | SPRY         | 169  | DEB37_00445     | Firmicutes            | Lysinibacillus sp.                              | TPA: hypothetical protein DEB37_00445, partial [Lysinibacillus sp.].                      | GCA_003510425.1 |
| HDO36693.1   | Cluster187_2clades→?→ Cluster187_2clades→?→ SPRY+SPRY*→                                                                           | SPRY+SPRY    | 913  | ENH07_10435     | Nitrospirae           | Nitrospirae bacterium                           | TPA: hypothetical protein ENH07_10435 [Nitrospirae bacterium].                            | GCA_011041165.1 |
| HHG11560.1   | SPRY+LisH*→                                                                                                                       | SPRY+LisH    | 821  | ENL98_17835     | unclassified Bacteria | bacterium                                       | TPA: hypothetical protein ENL98_17835 [bacterium].                                        | GCA_011373825.1 |
| HHG11879.1   | SIG+SPRY*→                                                                                                                        | SIG+SPRY     | 553  | ENL98_19440     | unclassified Bacteria | bacterium                                       | TPA: hypothetical protein ENL98_19440 [bacterium].                                        | GCA_011373825.1 |
| KAB2901287.1 | SPRY*→                                                                                                                            | SPRY         | 854  | F9K31_02560     | Gammaproteobacteria   | Dokdonella sp.                                  | hypothetical protein F9K31_02560 [Dokdonella sp.].                                        | GCA_008933665.1 |
| KAF6631785.1 | <-Polbetant  ACET→ Cupin_2→ ABhydrolase→  <-?-DUF2935  SIG+SPRY*→                                                                 | SIG+SPRY     | 323  | H6F38_13125     | Firmicutes            | Paenibacillus sp. EKM208P                       | hypothetical protein H6F38_13125 [Paenibacillus sp. EKM208P].                             | GCA_011066295.1 |
| KGM23936.1   | DUF3168→ Phage_TTP_11→ Phage_TAC_13→?→ SPRY+X*→?→?→ Phage-tail-tape→ ConA-repeats→                                                | SPRY+X       | 657  | LI87_0109275    | Gammaproteobacteria   | Stenotrophomonas maltophilia                    | hypothetical protein LI87_0109275 [Stenotrophomonas maltophilia].                         | GCA_000758465.1 |
| KHS06610.1   | Phage-tail-tape→?→?→?→?→ SPRY+X*→?→ DAM→                                                                                          | SPRY+X       | 658  | RM61_15205      | Gammaproteobacteria   | Xanthomonas phaseoli pv. phaseoli               | hypothetical protein RM61_15205 [Xanthomonas phaseoli pv. phaseoli].                      | GCA_000807875.2 |
| KKW33547.1   | SIG+SPRY*→                                                                                                                        | SIG+SPRY     | 838  | UY79_C0020G0005 | Bacteria              | Parcubacteria group bacterium GW2011_GWA2_53_21 | Filamentous hemagglutinin-like protein [Parcubacteria group bacterium GW2011_GWA2_53_21]. | GCA_001004625.1 |
| KOS00949.1   | SPRY*→                                                                                                                            | SPRY         | 155  | AM598_20185     | Firmicutes            | Paenibacillus polymyxa                          | hypothetical protein AM598_20185, partial [Paenibacillus polymyxa].                       | GCA_001277855.1 |
| KZT13763.1   | SPRY*→?→?→?→ DAM→                                                                                                                 | SPRY         | 449  | A1D30_21880     | Betaproteobacteria    | Acidovorax sp. GW101-3H11                       | hypothetical protein A1D30_21880 [Acidovorax sp. GW101-3H11].                             | GCA_001633105.1 |
| MAE42393.1   | SIG+TM+TM+IG*→                                                                                                                    | SIG+TM+TM+IG | 1722 | CMO93_01365     | DPANN group           | Candidatus Woesearchaeota archaeon              | hypothetical protein CMO93_01365, partial [Candidatus Woesearchaeota archaeon].           | GCA_002686855.1 |



| acc        | operon                                     | architecture                 | len  | gen.name    | taxend                   | species                         | define                                                                             | gca             |
|------------|--------------------------------------------|------------------------------|------|-------------|--------------------------|---------------------------------|------------------------------------------------------------------------------------|-----------------|
| NBO39260.1 | IG+IG+IG+LEVANB+SPRY*→                     | IG+IG+IG+LEVANB+SPRY         | 2486 | EBU99_11835 | unclassified<br>Bacteria | bacterium                       | hypothetical protein<br>EBU99_11835, partial<br>[bacterium].                       | GCA_009918675.1 |
| NBQ97491.1 | Laminin_G_3+SPRY*→?→ Cluster358_2clades→   | Laminin_G_3+SPRY             | 447  | EBU12_04555 | Actinobacteria           | Microbacteriaceae<br>bacterium  | hypothetical protein<br>EBU12_04555<br>[Microbacteriaceae<br>bacterium].           | GCA_009920365.1 |
| NBR26007.1 | SPRY*→                                     | SPRY                         | 290  | EBU08_19945 | Actinobacteria           | Micrococcales<br>bacterium      | hypothetical protein<br>EBU08_19945, partial<br>[Micrococcales<br>bacterium].      | GCA_009920425.1 |
| NBR26025.1 | Laminin_G_3+SPRY*→                         | Laminin_G_3+SPRY             | 450  | EBU08_20035 | Actinobacteria           | Micrococcales<br>bacterium      | hypothetical protein<br>EBU08_20035, partial<br>[Micrococcales<br>bacterium].      | GCA_009920425.1 |
| NBS68787.1 | Laminin_G_3+SPRY*→?→?→ Cluster153_2clades→ | Laminin_G_3+SPRY             | 775  | EBT31_07700 | unclassified<br>Bacteria | bacterium                       | hypothetical protein<br>EBT31_07700<br>[bacterium].                                | GCA_009921885.1 |
| NBS71002.1 | Laminin_G_3+SPRY*→                         | Laminin_G_3+SPRY             | 470  | EBT31_19160 | unclassified<br>Bacteria | bacterium                       | hypothetical protein<br>EBT31_19160, partial<br>[bacterium].                       | GCA_009921885.1 |
| NBS80068.1 | Laminin_G_3+SPRY*→                         | Laminin_G_3+SPRY             | 347  | EBS57_09835 | unclassified<br>Bacteria | bacterium                       | hypothetical protein<br>EBS57_09835<br>[bacterium].                                | GCA_009923095.1 |
| NBT48002.1 | Laminin_G_3+SPRY*→                         | Laminin_G_3+SPRY             | 734  | EBT07_09340 | Actinobacteria           | Actinobacteria<br>bacterium     | hypothetical protein<br>EBT07_09340, partial<br>[Actinobacteria<br>bacterium].     | GCA_009922275.1 |
| NBT76477.1 | Laminin_G_3+SPRY*→ Cluster74_6clades→      | Laminin_G_3+SPRY             | 576  | EBT15_11040 | Betaproteobacte-<br>ria  | Betaproteobacteria<br>bacterium | hypothetical protein<br>EBT15_11040, partial<br>[Betaproteobacteria<br>bacterium]. | GCA_009922135.1 |
| NBU64721.1 | Cluster359_2clades→?→ Laminin_G_3+SPRY*→   | Laminin_G_3+SPRY             | 351  | EBS29_09505 | Chloroflexi              | Chloroflexia bacterium          | hypothetical protein<br>EBS29_09505, partial<br>[Chloroflexia<br>bacterium].       | GCA_009923655.1 |
| NBU69993.1 | Laminin_G_3+SPRY+Laminin_G_3*→             | Laminin_G_3+SPRY+Laminin_G_3 | 937  | EBS53_00865 | Bacteroidetes            | Bacteroidetes<br>bacterium      | hypothetical protein<br>EBS53_00865<br>[Bacteroidetes<br>bacterium].               | GCA_009923185.1 |
| NBU73444.1 | Laminin_G_3+SPRY*→                         | Laminin_G_3+SPRY             | 374  | EBS53_18720 | Bacteroidetes            | Bacteroidetes<br>bacterium      | hypothetical protein<br>EBS53_18720, partial<br>[Bacteroidetes<br>bacterium].      | GCA_009923185.1 |
| NBW17394.1 | Laminin_G_3+SPRY*→ Cluster214_3clades→     | Laminin_G_3+SPRY             | 581  | EBR82_56380 | Alphaproteobacte-<br>ria | Caulobacteraceae<br>bacterium   | hypothetical protein<br>EBR82_56380, partial<br>[Caulobacteraceae<br>bacterium].   | GCA_009924585.1 |
| NBW17505.1 | Laminin_G_3+SPRY*→                         | Laminin_G_3+SPRY             | 764  | EBR82_56945 | Alphaproteobacte-<br>ria | Caulobacteraceae<br>bacterium   | hypothetical protein<br>EBR82_56945, partial<br>[Caulobacteraceae<br>bacterium].   | GCA_009924585.1 |

| acc        | operon                                                          | architecture     | len | gen.name    | taxend                | species                    | define                                                                  | gca             |
|------------|-----------------------------------------------------------------|------------------|-----|-------------|-----------------------|----------------------------|-------------------------------------------------------------------------|-----------------|
| NBW18892.1 | Laminin_G_3+SPRY*→                                              | Laminin_G_3+SPRY | 722 | EBR82_64050 | Alphaproteobacteria   | Caulobacteraceae bacterium | hypothetical protein EBR82_64050, partial [Caulobacteraceae bacterium]. | GCA_009924585.1 |
| NBW20101.1 | SPRY*→                                                          | SPRY             | 400 | EBR82_70235 | Alphaproteobacteria   | Caulobacteraceae bacterium | hypothetical protein EBR82_70235, partial [Caulobacteraceae bacterium]. | GCA_009924585.1 |
| NBW20127.1 | Laminin_G_3+SPRY*→                                              | Laminin_G_3+SPRY | 498 | EBR82_70370 | Alphaproteobacteria   | Caulobacteraceae bacterium | hypothetical protein EBR82_70370, partial [Caulobacteraceae bacterium]. | GCA_009924585.1 |
| NBW20301.1 | Laminin_G_3+SPRY*→                                              | Laminin_G_3+SPRY | 508 | EBR82_71270 | Alphaproteobacteria   | Caulobacteraceae bacterium | hypothetical protein EBR82_71270 [Caulobacteraceae bacterium].          | GCA_009924585.1 |
| NBW20891.1 | Laminin_G_3+SPRY*→                                              | Laminin_G_3+SPRY | 494 | EBR82_74310 | Alphaproteobacteria   | Caulobacteraceae bacterium | hypothetical protein EBR82_74310, partial [Caulobacteraceae bacterium]. | GCA_009924585.1 |
| NBW21054.1 | Laminin_G_3+SPRY*→                                              | Laminin_G_3+SPRY | 448 | EBR82_75135 | Alphaproteobacteria   | Caulobacteraceae bacterium | hypothetical protein EBR82_75135, partial [Caulobacteraceae bacterium]. | GCA_009924585.1 |
| NBW21679.1 | SPRY*→                                                          | SPRY             | 285 | EBR82_78355 | Alphaproteobacteria   | Caulobacteraceae bacterium | hypothetical protein EBR82_78355, partial [Caulobacteraceae bacterium]. | GCA_009924585.1 |
| NBW22642.1 | SPRY*→                                                          | SPRY             | 394 | EBR82_83325 | Alphaproteobacteria   | Caulobacteraceae bacterium | hypothetical protein EBR82_83325, partial [Caulobacteraceae bacterium]. | GCA_009924585.1 |
| NBW23811.1 | Laminin_G_3+SPRY*→                                              | Laminin_G_3+SPRY | 335 | EBR82_89280 | Alphaproteobacteria   | Caulobacteraceae bacterium | hypothetical protein EBR82_89280, partial [Caulobacteraceae bacterium]. | GCA_009924585.1 |
| NBX81523.1 | Laminin_G_3+SPRY*→                                              | Laminin_G_3+SPRY | 455 | EBQ90_00310 | unclassified Bacteria | bacterium                  | hypothetical protein EBQ90_00310, partial [bacterium].                  | GCA_009927045.1 |
| NBX88437.1 | SPRY*→                                                          | SPRY             | 317 | EBQ97_07980 | Bacteroidetes         | Bacteroidetes bacterium    | hypothetical protein EBQ97_07980, partial [Bacteroidetes bacterium].    | GCA_009926925.1 |
| NDA10477.1 | Laminin_G_3+SPRY*→ Cluster214_3clades→                          | Laminin_G_3+SPRY | 692 | EBZ07_06485 | Verrucomicrobia       | Verrucomicrobia bacterium  | hypothetical protein EBZ07_06485, partial [Verrucomicrobia bacterium].  | GCA_010025475.1 |
| NDB59170.1 | Cluster201_3clades→?→?→?→ LamG→ SPRY+TM*→?→ Cluster366_2clades→ | SPRY+TM          | 300 | EB001_12060 | unclassified Bacteria | bacterium                  | hypothetical protein EB001_12060 [bacterium].                           | GCA_010026765.1 |

| acc        | operon                                                                                                                         | architecture     | len | gen.name     | taxend                   | species                                 | define                                                                              | gca             |
|------------|--------------------------------------------------------------------------------------------------------------------------------|------------------|-----|--------------|--------------------------|-----------------------------------------|-------------------------------------------------------------------------------------|-----------------|
| NDB60922.1 | Laminin_G_3+SPRY*→                                                                                                             | Laminin_G_3+SPRY | 799 | EB001_21125  | unclassified<br>Bacteria | bacterium                               | hypothetical protein<br>EB001_21125<br>[bacterium].                                 | GCA_010026765.1 |
| NDC49301.1 | Cluster93_5clades→ Laminin_G_3+SPRY*→ Cluster214_3clades→                                                                      | Laminin_G_3+SPRY | 803 | EBZ61_09545  | Actinobacteria           | Micrococcales<br>bacterium              | hypothetical protein<br>EBZ61_09545<br>[Micrococcales<br>bacterium].                | GCA_010027415.1 |
| NDC57204.1 | SIG+SPRY*→                                                                                                                     | SIG+SPRY         | 239 | EBZ69_10460  | Alphaproteobacte-<br>ria | Alphaproteobacteria<br>bacterium        | hypothetical protein<br>EBZ69_10460, partial<br>[Alphaproteobacteria<br>bacterium]. | GCA_010027225.1 |
| NDD55753.1 | Laminin_G_3+SPRY*→                                                                                                             | Laminin_G_3+SPRY | 430 | EBZ39_18125  | unclassified<br>Bacteria | bacterium                               | hypothetical protein<br>EBZ39_18125, partial<br>[bacterium].                        | GCA_010027825.1 |
| NDD86023.1 | SPRY*→                                                                                                                         | SPRY             | 370 | EBZ38_17325  | unclassified<br>Bacteria | bacterium                               | hypothetical protein<br>EBZ38_17325, partial<br>[bacterium].                        | GCA_010027835.1 |
| NDG32417.1 | Laminin_G_3+SPRY*→                                                                                                             | Laminin_G_3+SPRY | 801 | EB118_20375  | unclassified<br>Bacteria | bacterium                               | hypothetical protein<br>EB118_20375, partial<br>[bacterium].                        | GCA_010031135.1 |
| NEU24684.1 | HTH_20→  <-PSE<-Polbetant<-Polbetant  ACET→ Cupin_2→  <-?  SIG+SPRY*→                                                          | SIG+SPRY         | 355 | G3M74_00590  | Firmicutes               | Paenibacillus<br>polymyxa               | hypothetical protein<br>G3M74_00590<br>[Paenibacillus<br>polymyxa].                 | GCA_010692785.1 |
| NEZ74825.1 | Cluster171_2clades→?→?→ Cluster216_2clades→?→?→ PSE→ SUN→ SPRY*→ SUN→ TM→ Cluster104_2clades→?→?→35exo→<br>Cluster112_2clades→ | SPRY             | 447 | EXM56_05600  | Firmicutes               | Clostridium botulinum                   | cell adhesion protein<br>[Clostridium<br>botulinum].                                | GCA_011010615.1 |
| NFM46879.1 | Cluster171_2clades→?→?→ Cluster143_2clades→?→?→ PSE→ SUN→ SPRY*→ SUN→ TM→ Cluster104_2clades→?→?→35exo→<br>Cluster112_2clades→ | SPRY             | 447 | FDB72_12170  | Firmicutes               | Clostridium botulinum                   | cell adhesion protein<br>[Clostridium<br>botulinum].                                | GCA_011017125.1 |
| NFM77397.1 | Cluster216_2clades→?→?→?→ SUN→ SPRY*→ SUN→ TM→ Cluster104_2clades→?→?→35exo→ Cluster112_2clades→                               | SPRY             | 448 | FDC04_00825  | Firmicutes               | Clostridium botulinum                   | cell adhesion protein<br>[Clostridium<br>botulinum].                                | GCA_011017715.1 |
| NIT14181.1 | Cluster165_3clades→?→?→ Cluster303_2clades→ SIG+HORMA→ Cluster138_2clades→ Cluster138_2clades→ SPRY*→ ThuA-GATase→             | SPRY             | 831 | GTN99_08085  | Bacteria                 | Candidatus<br>Dadabacteria<br>bacterium | hypothetical protein<br>GTN99_08085<br>[Candidatus<br>Dadabacteria<br>bacterium].   | GCA_011772905.1 |
| NSB16447.1 | SPRY+Big_2*→ TM→                                                                                                               | SPRY+Big_2       | 376 | BCD95_004706 | Firmicutes               | Clostridium<br>beijerinckii             | uncharacterized<br>protein YjdB<br>[Clostridium<br>beijerinckii].                   | GCA_013297045.1 |
| NUH63603.1 | HK97-gp10_like→ DUF3168→ Phage_TTP_11→ Phage_TAC_13→?→ SPRY*→                                                                  | SPRY             | 353 | HUF69_20240  | Gammaproteobac-<br>teria | Stenotrophomonas<br>maltophilia         | hypothetical protein<br>HUF69_20240, partial<br>[Stenotrophomonas<br>maltophilia].  | GCA_013345715.1 |
| OBU49329.1 | Phage_connect_1→ Phage_H_T_join→ HK97-gp10_like→ DUF3168→ Phage_TTP_11→ Phage_TAC_13→?→ SPRY+X*→                               | SPRY+X           | 657 | A9K69_19720  | Gammaproteobac-<br>teria | Stenotrophomonas<br>maltophilia         | hypothetical protein<br>A9K69_19720<br>[Stenotrophomonas<br>maltophilia].           | GCA_001676445.1 |

| acc        | operon                                                                                                                                | architecture                 | len  | gen.name    | taxend | species                               | define                                                                    | gca             |
|------------|---------------------------------------------------------------------------------------------------------------------------------------|------------------------------|------|-------------|--------|---------------------------------------|---------------------------------------------------------------------------|-----------------|
| ODV27998.1 | SPRY*→                                                                                                                                | SPRY                         | 1123 | ABT19_00375 | Gamma  | Rhodanobacter sp. SCN 68-63           | hypothetical protein ABT19_00375 [Rhodanobacter sp. SCN 68-63].           | GCA_001725485.1 |
| OEU67544.1 | Cluster138_2clades→?→?→ SPRY*→ Cluster135_2clades→?→ ThuA-GATase→                                                                     | SPRY                         | 483  | BA863_12330 | Delta  | Desulfovibrio sp. S3730MH75           | hypothetical protein BA863_12330 [Desulfovibrio sp. S3730MH75].           | GCA_001750915.1 |
| OEU68515.1 | SIG+PTX*→                                                                                                                             | SIG+PTX                      | 1668 | BBJ57_07495 | Delta  | Desulfobacteriales bacterium PC51MH44 | hypothetical protein BBJ57_07495 [Desulfobacteriales bacterium PC51MH44]. | GCA_001751165.1 |
| OEU69113.1 | SPRY*→ Cluster135_2clades→?→?→ ThuA-GATase→                                                                                           | SPRY                         | 436  | BA863_04090 | Delta  | Desulfovibrio sp. S3730MH75           | hypothetical protein BA863_04090 [Desulfovibrio sp. S3730MH75].           | GCA_001750915.1 |
| OEU13744.1 | Laminin_G_3+Laminin_G_3+SPRY*→ Cluster74_6clades→ Cluster388_2clades→                                                                 | Laminin_G_3+Laminin_G_3+SPRY | 1163 | CBD24_02790 | Eury   | Euryarchaeota archaeon TMED164        | hypothetical protein CBD24_02790 [Euryarchaeota archaeon TMED164].        | GCA_002170935.1 |
| OYV39756.1 | SPRY*→                                                                                                                                | SPRY                         | 137  | B7Z80_06345 | Alpha  | Rhodospirillales bacterium 20-64-7    | hypothetical protein B7Z80_06345 [Rhodospirillales bacterium 20-64-7].    | GCA_002255195.1 |
| PJO52612.1 | Phage-tail-tape→ ConA-repeats→?→ SPRY+X*→?→?→?→?→?→?→  <-Ribonuc_L-PSP                                                                | SPRY+X                       | 604  | CR156_10635 | Gamma  | Stenotrophomonas lactitubi            | hypothetical protein CR156_10635 [Stenotrophomonas lactitubi].            | GCA_002803515.1 |
| PKQ92730.1 | SUN→ SUN→ SUN→ SPRY+SUN*→ Laminin_G_3→ Disaggr_repeat→                                                                                | SPRY+SUN                     | 425  | CXK86_01005 | Firmi  | Paenibacillus sp. BGI2013             | hypothetical protein CXK86_01005 [Paenibacillus sp. BGI2013].             | GCA_002843485.1 |
| PPC99495.1 | Cluster368_2clades→?→?→ Cluster201_3clades→ TM+TM→ Laminin_G_3+SPRY*→?→?→  <-?<-?<-REC+OmpR-HTH                                       | Laminin_G_3+SPRY             | 541  | CTY35_04040 | Beta   | Methylotenera sp.                     | hypothetical protein CTY35_04040 [Methylotenera sp.].                     | GCA_002928435.1 |
| PPD25805.1 | SPRY*→                                                                                                                                | SPRY                         | 389  | CTY21_14065 | Gamma  | Methylomonas sp.                      | hypothetical protein CTY21_14065, partial [Methylomonas sp.].             | GCA_002928935.1 |
| QDL55294.1 | Phage-tail_3+FN3→ Cluster93_5clades→ Laminin_G_3+SPRY*→?→?→  <-?<-REC+OmpR-HTH                                                        | Laminin_G_3+SPRY             | 544  | EXZ61_14585 | Beta   | Rhodoferax sediminis                  | hypothetical protein EXZ61_14585 [Rhodoferax sediminis].                  | GCA_006974105.1 |
| QDY47412.1 | Phage_connect_1→ Phage_H_T_join→ HK97-gp10_like→ DUF3168→ Phage_TTP_11→ Phage_TAC_13→?→ SPRY+X*→?→?→?→ Phage-tail-tape→ ConA-repeats→ | SPRY+X                       | 657  | DUW70_02065 | Gamma  | Stenotrophomonas maltophilia          | hypothetical protein DUW70_02065 [Stenotrophomonas maltophilia].          | GCA_007833655.1 |
| QDY50235.1 | Phage-tail-tape→ ConA-repeats→?→ SPRY+X*→                                                                                             | SPRY+X                       | 604  | DUW70_17765 | Gamma  | Stenotrophomonas maltophilia          | hypothetical protein DUW70_17765 [Stenotrophomonas maltophilia].          | GCA_007833655.1 |

| acc        | operon                                                                                                                                   | architecture      | len  | gen.name     | taxend              | species                       | define                                                            | gca             |
|------------|------------------------------------------------------------------------------------------------------------------------------------------|-------------------|------|--------------|---------------------|-------------------------------|-------------------------------------------------------------------|-----------------|
| QDY50408.1 | Phage_connect_1→ Phage_H_T_join→ HK97-gp10_like→ DUF3168→ Phage_TTP_11→ Phage_TAC_13→?→ SPRY+X*→  <-?  ?→ Phage-tail-tape→ ConA-repeats→ | SPRY+X            | 655  | DUW70_18735  | Gammaproteobacteria | Stenotrophomonas maltophilia  | hypothetical protein DUW70_18735 [Stenotrophomonas maltophilia].  | GCA_007833655.1 |
| QGG50745.1 | SUN→ SUN→ SPRY+SUN*→ SUN→ Laminin_G_3→ Disaggr_repeat→?→?→ Phage_holin_1→                                                                | SPRY+SUN          | 444  | GDS87_07165  | Firmicutes          | Lysinibacillus pakistanensis  | hypothetical protein GDS87_07165 [Lysinibacillus pakistanensis].  | GCA_009649975.1 |
| QIO87716.1 | Phage_connect_1→ Phage_H_T_join→ HK97-gp10_like→?→ Phage_TTP_11→?→ SPRY*→?→?→  <-SRAP                                                    | SPRY              | 278  | G9274_001401 | Gammaproteobacteria | Stenotrophomonas rhizophila   | hypothetical protein G9274_001401 [Stenotrophomonas rhizophila].  | GCA_011604605.1 |
| RCK36140.1 | Baseplate_J→ SPRY*→                                                                                                                      | SPRY              | 575  | TH9_05700    | Alphaproteobacteria | Thalassospira xiamenensis     | hypothetical protein TH9_05700 [Thalassospira xiamenensis].       | GCA_003326725.1 |
| REJ66078.1 | JAB+NLPC→?→ Phage_tail_3→ Cluster93_5clades→ Laminin_G_3+SPRY*→ Cluster74_6clades→                                                       | Laminin_G_3+SPRY  | 1115 | DWQ28_08310  | Proteobacteria      | Proteobacteria bacterium      | hypothetical protein DWQ28_08310 [Proteobacteria bacterium].      | GCA_003388625.1 |
| REK63903.1 | Phage_tail_APC→ TM+TM→ Laminin_G_3+SPRY*→ Cluster74_6clades→?→?→ Phage_tail_APC→                                                         | Laminin_G_3+SPRY  | 797  | DWQ49_02055  | Bacteroidetes       | Bacteroidetes bacterium       | hypothetical protein DWQ49_02055 [Bacteroidetes bacterium].       | GCA_003389155.1 |
| RLC76825.1 | Cluster187_2clades→ SPRY*→ Cluster135_2clades→                                                                                           | SPRY              | 515  | DRJ03_27900  | Chloroflexi         | Chloroflexi bacterium         | hypothetical protein DRJ03_27900 [Chloroflexi bacterium].         | GCA_003648075.1 |
| RPI56186.1 | Cluster138_2clades→?→?→ SPRY*→ Cluster135_2clades→                                                                                       | SPRY              | 495  | EHM49_00895  | Deltaproteobacteria | Deltaproteobacteria bacterium | hypothetical protein EHM49_00895 [Deltaproteobacteria bacterium]. | GCA_003819885.1 |
| RRY03816.1 | SPRY*→?→ Phage_lysozyme→                                                                                                                 | SPRY              | 771  | EGJ58_22195  | Alphaproteobacteria | Ochrobactrum anthropi         | hypothetical protein EGJ58_22195 [Ochrobactrum anthropi].         | GCA_003937425.1 |
| RYG67597.1 | fn3+SPRY*→                                                                                                                               | fn3+SPRY          | 1230 | EON64_07085  | Archaea             | archaeon                      | hypothetical protein EON64_07085 [archaeon].                      | GCA_004145555.1 |
| RYH32433.1 | SF2-helicase+SPRY*→                                                                                                                      | SF2-helicase+SPRY | 535  | EON65_00615  | Archaea             | archaeon                      | DEAD/DEAH box helicase [archaeon].                                | GCA_004146225.1 |
| RYY37588.1 | SPRY*→                                                                                                                                   | SPRY              | 952  | EON62_01040  | Archaea             | archaeon                      | hypothetical protein EON62_01040, partial [archaeon].             | GCA_004173375.1 |
| RYY72402.1 | SPRY*→                                                                                                                                   | SPRY              | 164  | EON63_20910  | Archaea             | archaeon                      | hypothetical protein EON63_20910 [archaeon].                      | GCA_004173275.1 |
| TDL67967.1 | SUN→ SUN→ SPRY+SUN*→ Laminin_G_3→ Disaggr_repeat→                                                                                        | SPRY+SUN          | 425  | E2R58_01745  | Firmicutes          | Paenibacillus amylolyticus    | hypothetical protein E2R58_01745 [Paenibacillus amylolyticus].    | GCA_004358835.1 |

| acc        | operon                                                                                                                                        | architecture | len | gen.name        | taxend              | species                                       | define                                                                            | gca             |
|------------|-----------------------------------------------------------------------------------------------------------------------------------------------|--------------|-----|-----------------|---------------------|-----------------------------------------------|-----------------------------------------------------------------------------------|-----------------|
| TSC88001.1 | Laminin_G_3+Laminin_G_3+Laminin_G_3+Laminin_G_3→?→?→?→?→ SPRY+SUN*→<br>Laminin_G_3+Laminin_G_3+Laminin_G_3+Laminin_G_3→                       | SPRY+SUN     | 607 | G01um10145_950  | Bacteria            | Microgenomates group bacterium<br>Gr01-1014_5 | hypothetical protein G01um10145_950 [Microgenomates group bacterium Gr01-1014_5]. | GCA_007376395.1 |
| VUI62768.1 | Phage_connect_1→ Phage_H_T_join→ HK97-gp10_like→ DUF3168→ Phage_TTP_11→ Phage_TAC_13→?→ SPRY+X*→?→?→ Phage-tail-tape→                         | SPRY+X       | 655 | GCPJBBEJ_01199  | Gammaproteobacteria | Stenotrophomonas maltophilia                  | hypothetical protein GCPJBBEJ_01199 [Stenotrophomonas maltophilia].               | GCA_902156415.1 |
| VUJ81145.1 | Phage-tail-tape→ ConA-repeats→?→ SPRY+X*→?→?→?→?→ SIG+TM+TM+TM+TM+TM+TM+TM+TM+TM→ ABC-ATPase→                                                 | SPRY+X       | 604 | IEE-HEPME_02021 | Gammaproteobacteria | Stenotrophomonas maltophilia                  | hypothetical protein IEEHEPME_02021 [Stenotrophomonas maltophilia].               | GCA_902156595.1 |
| VUL57431.1 | Terminase_LS→ SPRY*→?→  <-?  SIG+TM+TM+TM+TM+ABC-ATPase→                                                                                      | SPRY         | 217 | LBG-BLGGB_01284 | Gammaproteobacteria | Stenotrophomonas maltophilia                  | hypothetical protein LGBLGGB_01284 [Stenotrophomonas maltophilia].                | GCA_902156925.1 |
| VUL62146.1 | Phage_connect_1→ Phage_H_T_join→ HK97-gp10_like→ DUF3168→ Phage_TTP_11→ Phage_TAC_13→?→ SPRY+X*→?→?→ Phage-tail-tape→                         | SPRY+X       | 657 | CCAN-PDJD_00380 | Gammaproteobacteria | Stenotrophomonas maltophilia                  | hypothetical protein CCANPDJD_00380 [Stenotrophomonas maltophilia].               | GCA_902157015.1 |
| VUL75017.1 | Phage_connect_1→ Phage_H_T_join→ HK97-gp10_like→?→ Phage_TTP_11→ Phage_TAC_13→?→ SPRY+X*→?→?→ Phage-tail-tape→                                | SPRY+X       | 655 | GEILP-BKL_02464 | Gammaproteobacteria | Stenotrophomonas maltophilia                  | hypothetical protein GEILPBKL_02464 [Stenotrophomonas maltophilia].               | GCA_902156945.1 |
| VUM07479.1 | Phage_connect_1→ Phage_H_T_join→ HK97-gp10_like→ DUF3168→ Phage_TTP_11→ Phage_TAC_13→?→ SPRY+X*→?→?→ Phage-tail-tape→ ConA-repeats→?→?→ SRAP→ | SPRY+X       | 657 | IKOGN-NCB_02002 | Gammaproteobacteria | Stenotrophomonas maltophilia                  | hypothetical protein IKOGNNCB_02002 [Stenotrophomonas maltophilia].               | GCA_902157055.1 |
| VUM45402.1 | ConA-repeats→?→ SPRY+X*→                                                                                                                      | SPRY+X       | 604 | FMOPOFGM_00942  | Gammaproteobacteria | Stenotrophomonas maltophilia                  | hypothetical protein FMOPOFGM_00942 [Stenotrophomonas maltophilia].               | GCA_902157105.1 |
| VUM59055.1 | Phage_connect_1→ Phage_H_T_join→ HK97-gp10_like→ DUF3168→ Phage_TTP_11→ Phage_TAC_13→?→ SPRY+X*→?→?→ Phage-tail-tape→ ConA-repeats→           | SPRY+X       | 657 | FMOPOFGM_03099  | Gammaproteobacteria | Stenotrophomonas maltophilia                  | hypothetical protein FMOPOFGM_03099 [Stenotrophomonas maltophilia].               | GCA_902157105.1 |
| VUN16325.1 | Phage_connect_1→ Phage_H_T_join→ HK97-gp10_like→ DUF3168→ Phage_TTP_11→ Phage_TAC_13→?→ SPRY+X*→  <-?  ?→?→ Phage-tail-tape→ ConA-repeats→    | SPRY+X       | 657 | CP-DIOOCO_00061 | Gammaproteobacteria | Stenotrophomonas maltophilia                  | hypothetical protein CPDIOOCO_00061 [Stenotrophomonas maltophilia].               | GCA_902157315.1 |
| VUN62462.1 | Phage_connect_1→ Phage_H_T_join→ HK97-gp10_like→ DUF3168→ Phage_TTP_11→ Phage_TAC_13→?→ SPRY+X*→?→?→ Phage-tail-tape→ ConA-repeats→ ConA→     | SPRY+X       | 655 | FHOP-GADK_00135 | Gammaproteobacteria | Stenotrophomonas maltophilia                  | hypothetical protein FHOPGADK_00135 [Stenotrophomonas maltophilia].               | GCA_902157435.1 |
| VUN67178.1 | Phage_H_T_join→ HK97-gp10_like→ DUF3168→ Phage_TTP_11→ Phage_TAC_13→?→?→ SPRY+X*→  <-?  ?→ Phage-tail-tape→                                   | SPRY+X       | 601 | JLECIBJP_00444  | Gammaproteobacteria | Stenotrophomonas maltophilia                  | hypothetical protein JLECIBJP_00444 [Stenotrophomonas maltophilia].               | GCA_902157425.1 |

| acc        | operon                                                                                                                                          | architecture | len | gen.name        | taxend              | species                      | define                                                               | gca             |
|------------|-------------------------------------------------------------------------------------------------------------------------------------------------|--------------|-----|-----------------|---------------------|------------------------------|----------------------------------------------------------------------|-----------------|
| VUN71522.1 | Phage_connect_1→ Phage_H_T_join→ HK97-gp10_like→ DUF3168→ Phage_TTP_11→ Phage_TAC_13→?→ SPRY+X*→?→ Phage-tail-tape→ ConA-repeats→?→?→ SRAP→     | SPRY+X       | 655 | IJ-MOMJOI_00888 | Gammaproteobacteria | Stenotrophomonas maltophilia | hypothetical protein IJMOMJOI_00888 [Stenotrophomonas maltophilia].  | GCA_902157415.1 |
| VUO23348.1 | Phage_connect_1→ Phage_H_T_join→ HK97-gp10_like→ DUF3168→ Phage_TTP_11→ Phage_TAC_13→?→ SPRY+X*→?→?→ Phage-tail-tape→?→?→?→  <-SRAP             | SPRY+X       | 656 | JBID-JGIM_02130 | Gammaproteobacteria | Stenotrophomonas maltophilia | hypothetical protein JBIDJGIM_02130 [Stenotrophomonas maltophilia].  | GCA_902157545.1 |
| VUO59656.1 | Phage_connect_1→ Phage_H_T_join→ HK97-gp10_like→ DUF3168→ Phage_TTP_11→ Phage_TAC_13→?→ SPRY+X*→?→?→ Phage-tail-tape→ ConA-repeats→?→?→  <-SRAP | SPRY+X       | 655 | CMGNCPHI_00882  | Gammaproteobacteria | Stenotrophomonas maltophilia | hypothetical protein CMGNCPHI_00882 [Stenotrophomonas maltophilia].  | GCA_902157585.1 |
| VUP11864.1 | Phage_connect_1→ Phage_H_T_join→ HK97-gp10_like→ DUF3168→ Phage_TTP_11→ Phage_TAC_13→?→ SPRY+X*→?→?→ Phage-tail-tape→                           | SPRY+X       | 658 | ECE-FJIBE_02107 | Gammaproteobacteria | Stenotrophomonas maltophilia | hypothetical protein ECEFJIBE_02107 [Stenotrophomonas maltophilia].  | GCA_902157845.1 |
| VUP33787.1 | Phage_connect_1→ Phage_H_T_join→ HK97-gp10_like→ DUF3168→ Phage_TTP_11→ Phage_TAC_13→?→ SPRY+X*→?→?→ Phage-tail-tape→                           | SPRY+X       | 657 | ECE-FJIBE_03296 | Gammaproteobacteria | Stenotrophomonas maltophilia | hypothetical protein ECEFJIBE_03296 [Stenotrophomonas maltophilia].  | GCA_902157845.1 |
| VUP45028.1 | Phage_connect_1→ Phage_H_T_join→ HK97-gp10_like→ DUF3168→ Phage_TTP_11→ Phage_TAC_13→?→ SPRY+X*→?→?→ Phage-tail-tape→ ConA-repeats→?→?→ SRAP→   | SPRY+X       | 657 | KEFP-IEB_04064  | Gammaproteobacteria | Stenotrophomonas maltophilia | hypothetical protein KEFP-IEB_04064 [Stenotrophomonas maltophilia].  | GCA_902157865.1 |
| VUP91253.1 | Phage_connect_1→ Phage_H_T_join→ HK97-gp10_like→ DUF3168→ Phage_TTP_11→ Phage_TAC_13→?→ SPRY+X*→  <-?  ?→?→ Phage-tail-tape→ ConA-repeats→      | SPRY+X       | 657 | BLDAJIEI_03531  | Gammaproteobacteria | Stenotrophomonas maltophilia | hypothetical protein BLDAJIEI_03531 [Stenotrophomonas maltophilia].  | GCA_902157935.1 |
| VUP99062.1 | Phage_connect_1→ Phage_H_T_join→ HK97-gp10_like→ DUF3168→ Phage_TTP_11→ Phage_TAC_13→?→ SPRY+X*→?→?→ Phage-tail-tape→                           | SPRY+X       | 655 | BIEDFHEJ_01659  | Gammaproteobacteria | Stenotrophomonas maltophilia | hypothetical protein BIEDFHEJ_01659 [Stenotrophomonas maltophilia].  | GCA_902157995.1 |
| VUQ06316.1 | Phage_connect_1→ Phage_H_T_join→ HK97-gp10_like→ DUF3168→ Phage_TTP_11→ Phage_TAC_13→?→ SPRY+X*→?→?→ Phage-tail-tape→                           | SPRY+X       | 655 | JPICFAGD_01619  | Gammaproteobacteria | Stenotrophomonas maltophilia | hypothetical protein JPICFAGD_01619 [Stenotrophomonas maltophilia].  | GCA_902158065.1 |
| VUQ08603.1 | Phage_connect_1→ Phage_H_T_join→ HK97-gp10_like→ DUF3168→ Phage_TTP_11→ Phage_TAC_13→?→ SPRY+X*→  <-?  ?→ Phage-tail-tape→ ConA-repeats→        | SPRY+X       | 655 | MKCK-LKB_01148  | Gammaproteobacteria | Stenotrophomonas maltophilia | hypothetical protein MKCKLKB_01148 [Stenotrophomonas maltophilia].   | GCA_902158105.1 |
| VUQ16634.1 | Phage_connect_1→ Phage_H_T_join→ HK97-gp10_like→ DUF3168→ Phage_TTP_11→ Phage_TAC_13→?→ SPRY+X*→  <-?  ?→ Phage-tail-tape→                      | SPRY+X       | 657 | DOOMH-BAD_02908 | Gammaproteobacteria | Stenotrophomonas maltophilia | hypothetical protein DOOMH-BAD_02908 [Stenotrophomonas maltophilia]. | GCA_902158025.1 |
| VUR39033.1 | Phage_connect_1→ Phage_H_T_join→ HK97-gp10_like→ DUF3168→ Phage_TTP_11→ Phage_TAC_13→?→ SPRY+X*→?→?→ Phage-tail-tape→ ConA-repeats→?→?→ SRAP→   | SPRY+X       | 657 | JHKEGKPK_04271  | Gammaproteobacteria | Stenotrophomonas maltophilia | hypothetical protein JHKEGKPK_04271 [Stenotrophomonas maltophilia].  | GCA_902158305.1 |
| VUR45784.1 | Phage_connect_1→ Phage_H_T_join→ HK97-gp10_like→ DUF3168→ Phage_TTP_11→ Phage_TAC_13→?→ SPRY+X*→?→?→ Phage-tail-tape→ ConA-repeats→?→?→  <-SRAP | SPRY+X       | 657 | PGEAM-FKH_03207 | Gammaproteobacteria | Stenotrophomonas maltophilia | hypothetical protein PGEAMFKH_03207 [Stenotrophomonas maltophilia].  | GCA_902158325.1 |

| acc            | operon                                                                                                                                              | architecture         | len  | gen.name        | taxend              | species                          | define                                                                                     | gca             |
|----------------|-----------------------------------------------------------------------------------------------------------------------------------------------------|----------------------|------|-----------------|---------------------|----------------------------------|--------------------------------------------------------------------------------------------|-----------------|
| VUR81206.1     | Phage_connect_1→ Phage_H_T_join→ HK97-gp10_like→ DUF3168→ Phage_TTP_11→ Phage_TAC_13→?→ SPRY+X*→?→?→ Phage-tail-tape→ ConA-repeats→ ConA→?→  <-SRAP | SPRY+X               | 655  | GMKOK-IBD_01185 | Gammaproteobacteria | Stenotrophomonas maltophilia     | hypothetical protein GMKOKIBD_01185 [Stenotrophomonas maltophilia].                        | GCA_902158475.1 |
| WP_007428531.1 | <-ABhydrolase<-?  SIG+SPRY→ SIG+SPRY→ SUN→  <-?<-Glycos_transf_2<-?  SUN→                                                                           | SIG+SPRY             | 322  | WG8_RS02665     | Firmicutes          | Paenibacillus sp. Aloe-11        | hypothetical protein [Paenibacillus sp. Aloe-11].                                          | GCF_000245715.1 |
| WP_010076376.1 | <-SIG+IG<-?  SPRY+Big_2→ SPRY+Big_2→  <-ACET                                                                                                        | SPRY+Big_2           | 292  | CLO-CEL_RS05090 | Firmicutes          | Clostridium cellulovorans        | Ig-like domain-containing protein [Clostridium cellulovorans].                             | GCF_000145275.1 |
| WP_013308530.1 | HTH_20→  <-ABhydrolase<-Polbetant  ACET→ Cupin_2→  <-DUF2935  SIG+SPRY*→  <-?  ?→  <-Glycos_transf_2                                                | SIG+SPRY             | 346  | PPE_RS02405     | Firmicutes          | Paenibacillus polymyxa           | hypothetical protein [Paenibacillus polymyxa].                                             | GCF_000146875.3 |
| WP_013513300.1 | Phage_T7_tail→ SPRY*→ Phage_tail_APC→                                                                                                               | SPRY                 | 528  | DAES_RS01675    | Deltaproteobacteria | Pseudodesulfovibrio aespoecensis | SPla/Ryanodine receptor SPRY domain-containing protein [Pseudodesulfovibrio aespoecensis]. | GCF_000176915.2 |
| WP_019226907.1 | SIG+SPRY*→                                                                                                                                          | SIG+SPRY             | 378  | BN359_RS15990   | Firmicutes          | Dehalobacter                     | MULTISPECIES: hypothetical protein [Dehalobacter].                                         | GCF_000309295.1 |
| WP_019639008.1 | SPRY+SUN→ SUN+SPRY→ Laminin_G_3→ Disaggr_repeat→ Phage_holin_4_1→                                                                                   | SPRY+SUN             | 411  | G358_RS0119880  | Firmicutes          | Paenibacillus fonticola          | hypothetical protein [Paenibacillus fonticola].                                            | GCF_000381905.1 |
| WP_019639009.1 | -                                                                                                                                                   | -                    | 413  | G358_RS0119885  | Firmicutes          | Paenibacillus fonticola          | discoidin domain-containing protein [Paenibacillus fonticola].                             | GCF_000381905.1 |
| WP_019687775.1 | SUN→ SPRY+Glyco_hydro_106*→ Laminin_G_3→ Disaggr_repeat→ Phage_holin_4_1→                                                                           | SPRY+Glyco_hydro_106 | 403  | H7A89_RS14065   | Firmicutes          | Paenibacillus polymyxa           | hypothetical protein [Paenibacillus polymyxa].                                             | GCF_903797665.1 |
| WP_020591223.1 | Phage_T7_tail→ SPRY*→                                                                                                                               | SPRY                 | 1351 | B152_RS0104640  | Alphaproteobacteria | Kiloniella laminariae            | hypothetical protein [Kiloniella laminariae].                                              | GCF_000374005.1 |
| WP_021132610.1 | SPRY*→ Phage_tail_APC→                                                                                                                              | SPRY                 | 746  | K678_RS11425    | Alphaproteobacteria | Phaeospirillum fulvum            | hypothetical protein [Phaeospirillum fulvum].                                              | GCF_000442515.1 |
| WP_021203812.1 | Phage_connect_1→ Phage_H_T_join→ HK97-gp10_like→ DUF3168→ Phage_TTP_11→ Phage_TAC_13→?→ SPRY+X*→?→?→ Phage-tail-tape→ ConA-repeats→?→?→  <-SRAP     | SPRY+X               | 657  | L681_RS129520   | Gammaproteobacteria | Stenotrophomonas maltophilia     | hypothetical protein [Stenotrophomonas maltophilia].                                       | GCF_000455685.1 |
| WP_023986763.1 | <-Trypsin<-ABhydrolase<-Polbetant  ACET→ Cupin_2→ ABhydrolase→  <-DUF2935  SIG+SPRY*→  <-PSE  ?→ SIG+SPRY→ PSE→  <-Glycos_transf_2                  | SIG+SPRY             | 331  | X809_RS02170    | Firmicutes          | Paenibacillus polymyxa           | hypothetical protein [Paenibacillus polymyxa].                                             | GCF_000507205.3 |
| WP_024956478.1 | Phage_connect_1→ Phage_H_T_join→ HK97-gp10_like→ DUF3168→ Phage_TTP_11→ Phage_TAC_13→ SPRY+X*→?→?→ Phage-tail-tape→                                 | SPRY+X               | 657  | BMR86_RS03335   | Gammaproteobacteria | Stenotrophomonas                 | MULTISPECIES: hypothetical protein [Stenotrophomonas].                                     | GCF_001591205.1 |
| WP_025116403.1 | SPRY→?→ SPRY+SUN→                                                                                                                                   | SPRY                 | 559  | U863_RS0116605  | Firmicutes          | Lysinibacillus fusiformis        | discoidin domain-containing protein [Lysinibacillus fusiformis].                           | GCF_000633275.1 |

| acc            | operon                                                                                                             | architecture | len | gen.name       | taxend     | species                    | define                                                           | gca             |
|----------------|--------------------------------------------------------------------------------------------------------------------|--------------|-----|----------------|------------|----------------------------|------------------------------------------------------------------|-----------------|
| WP_025116405.1 | -                                                                                                                  | -            | 396 | U863_RS0116615 | Firmicutes | Lysinibacillus fusiformis  | hypothetical protein [Lysinibacillus fusiformis].                | GCF_000633275.1 |
| WP_025219035.1 | SUN→SPRY*→SUN→SPRY→Laminin_G_3→Disaggr_repeat→?→?→Phage_holin_1→                                                   | SPRY         | 281 | T479_RS06935   | Firmicutes | Lysinibacillus varians     | hypothetical protein [Lysinibacillus varians].                   | GCF_000600105.1 |
| WP_025363879.1 | HTH_20→  <-Trypsin<-ABhydrolase  ACET→  <-DUF2935<-?  SIG+SPRY*→                                                   | SIG+SPRY     | 332 | LK13_RS15595   | Firmicutes | Paenibacillus polymyxa     | hypothetical protein [Paenibacillus polymyxa].                   | GCF_000597985.1 |
| WP_025676232.1 | HTH_20→  <-Trypsin<-ABhydrolase  ACET→  <-DUF2935<-?  SIG+SPRY*→                                                   | SIG+SPRY     | 327 | L695_RS0111830 | Firmicutes | Paenibacillus polymyxa     | hypothetical protein [Paenibacillus polymyxa].                   | GCF_000520795.1 |
| WP_025682581.1 | HTH_20→  <-?  ?→  <-DUF2935<-?  SIG+SPRY*→  <-PSE  SUN→  <-?  ?→  <-?<-?<-Phage_holin_4_1                          | SIG+SPRY     | 332 | L696_RS0104535 | Firmicutes | Paenibacillus maysiensis   | hypothetical protein [Paenibacillus maysiensis].                 | GCF_000520815.1 |
| WP_025716755.1 | HTH_20→  <-ABhydrolase<-?  SIG+SPRY*→                                                                              | SIG+SPRY     | 314 | L693_RS0107595 | Firmicutes | Paenibacillus sp. 1-18     | hypothetical protein [Paenibacillus sp. 1-18].                   | GCF_000520755.1 |
| WP_025721904.1 | HTH_20→  <-Trypsin<-ABhydrolase<-Polbetant  ACET→Cupin_2→  <-DUF2935  SIG+SPRY*→                                   | SIG+SPRY     | 218 | L694_RS0112470 | Firmicutes | Paenibacillus polymyxa     | hypothetical protein, partial [Paenibacillus polymyxa].          | GCF_000520775.1 |
| WP_028541175.1 | <-ABhydrolase<-Polbetant  ACET→Cupin_2→ABhydrolase→  <-DUF2935<-?  SIG+SPRY*→  <-?  ?→SIG+SPRY→  <-Glycos_transf_2 | SIG+SPRY     | 320 | BM358_RS15270  | Firmicutes | unclassified Paenibacillus | MULTISPECIES: hypothetical protein [unclassified Paenibacillus]. | GCF_900116035.1 |
| WP_028562231.1 | SPRY+SUN*→SUN→Laminin_G_3→Disaggr_repeat→                                                                          | SPRY+SUN     | 414 | H583_RS35510   | Firmicutes | Paenibacillus pinihumi     | hypothetical protein [Paenibacillus pinihumi].                   | GCF_000422505.1 |
| WP_029516016.1 | <-ABhydrolase<-Polbetant  ACET→Cupin_2→ABhydrolase→  <-DUF2935  SUN→SIG+SPRY*→?→?  <-Glycos_transf_2               | SIG+SPRY     | 322 | B439_RS0108145 | Firmicutes | Paenibacillus polymyxa     | hypothetical protein [Paenibacillus polymyxa].                   | GCF_000463565.1 |
| WP_029518099.1 | SUN→SUN*→Laminin_G_3→Disaggr_repeat→                                                                               | SUN          | 403 | B439_RS0121250 | Firmicutes | Paenibacillus polymyxa     | hypothetical protein [Paenibacillus polymyxa].                   | GCF_000463565.1 |
| WP_031462749.1 | HTH_20→  <-Trypsin<-ABhydrolase  ACET→  <-DUF2935<-?  SIG+SPRY*→                                                   | SIG+SPRY     | 308 | FC01_RS0115670 | Firmicutes | Paenibacillus polymyxa     | hypothetical protein [Paenibacillus polymyxa].                   | GCF_000735775.1 |
| WP_033066158.1 | Cluster143_2clades→?→?→?→SUN→SPRY*→PSE→PSE→SUN→TM→Cluster104_2clades→?→?→35exo→Cluster112_2clades→                 | SPRY         | 447 | N496_RS05195   | Firmicutes | Clostridium botulinum      | cell adhesion protein [Clostridium botulinum].                   | GCF_000710995.1 |
| WP_036124491.1 | SUN→SUN→?→SUN→SUN→SPRY*→SUN→Laminin_G_3→Disaggr_repeat→?→?→Phage_holin_1→                                          | SPRY         | 257 | HR49_RS16910   | Firmicutes | Lysinibacillus             | MULTISPECIES: hypothetical protein [Lysinibacillus].             | GCF_000724775.3 |
| WP_036147628.1 | SUN→SPRY+SUN→SPRY+SUN→SUN→SUN→SUN→Laminin_G_3→Disaggr_repeat→                                                      | SPRY+SUN     | 414 | KQ41_RS11015   | Firmicutes | Lysinibacillus fusiformis  | discoidin domain-containing protein [Lysinibacillus fusiformis]. | GCF_000755455.1 |
| WP_036147629.1 | -                                                                                                                  | -            | 433 | KQ41_RS11020   | Firmicutes | Lysinibacillus fusiformis  | discoidin domain-containing protein [Lysinibacillus fusiformis]. | GCF_000755455.1 |

| acc            | operon                                                                                                                                    | architecture     | len  | gen.name      | taxend              | species                      | define                                                              | gca             |
|----------------|-------------------------------------------------------------------------------------------------------------------------------------------|------------------|------|---------------|---------------------|------------------------------|---------------------------------------------------------------------|-----------------|
| WP_036669882.1 | SUN→SPRY+SUN→SPRY+SUN→Laminin_G_3→Disaggr_repeat→                                                                                         | SPRY+SUN         | 395  | C161_RS09450  | Firmicutes          | Paenibacillus sp. FSL R5-192 | hypothetical protein [Paenibacillus sp. FSL R5-192].                | GCF_000517845.1 |
| WP_040102262.1 | HTH_20→  <-Trypsin<-ABhydrolase  ACET→  <-DUF2935<-?  SIG+SPRY*→                                                                          | SIG+SPRY         | 319  | RE92_RS09150  | Firmicutes          | Paenibacillus polymyxa       | hypothetical protein [Paenibacillus polymyxa].                      | GCF_000819665.1 |
| WP_044646514.1 | <-DUF2935  ?→  <-?  SIG+SPRY*→                                                                                                            | SIG+SPRY         | 326  | QD47_RS12890  | Firmicutes          | Paenibacillus terrae         | hypothetical protein [Paenibacillus terrae].                        | GCF_000943545.1 |
| WP_044648488.1 | SIG+SPRY*→  <-?<-?<-?<-?<-?<-Phage_holin_4_1                                                                                              | SIG+SPRY         | 327  | QD47_RS23995  | Firmicutes          | Paenibacillus terrae         | hypothetical protein [Paenibacillus terrae].                        | GCF_000943545.1 |
| WP_044787083.1 | HTH_20→  <-Trypsin<-ABhydrolase  ACET→  <-DUF2935<-?  SIG+SPRY*→                                                                          | SIG+SPRY         | 357  | DS866_RS12660 | Firmicutes          | Paenibacillus polymyxa       | hypothetical protein [Paenibacillus polymyxa].                      | GCF_000943535.1 |
| WP_046501577.1 | Phage_T7_tail→SPRY*→                                                                                                                      | SPRY             | 1158 | WH95_RS00475  | Alphaproteobacteria | Kiloniella litopenaei        | hypothetical protein [Kiloniella litopenaei].                       | GCF_000982415.1 |
| WP_048035679.1 | SUN→SUN→SPRY*→?→?→?→  <-?<-?<-?<-ABC-ATPase                                                                                               | SPRY             | 890  | AB432_RS03735 | Firmicutes          | Brevibacillus brevis         | hypothetical protein [Brevibacillus brevis].                        | GCF_001039275.2 |
| WP_049431026.1 | Phage_connect_1→Phage_H_T_join→HK97-gp10_like→DUF3168→Phage_TTP_11→Phage_TAC_13→SPRY+X*→  <-?  ?→?→Phage-tail-tape→ConA-repeats→          | SPRY+X           | 657  | G5A48_RS10580 | Gammaproteobacteria | Stenotrophomonas maltophilia | hypothetical protein [Stenotrophomonas maltophilia].                | GCF_001069295.1 |
| WP_049432438.1 | Phage_connect_1→Phage_H_T_join→HK97-gp10_like→DUF3168→Phage_TTP_11→Phage_TAC_13→?→SPRY+X*→?→?→Phage-tail-tape→ConA-repeats→               | SPRY+X           | 655  | A7X76_RS05335 | Gammaproteobacteria | Stenotrophomonas maltophilia | hypothetical protein [Stenotrophomonas maltophilia].                | GCF_001070785.1 |
| WP_049448603.1 | Phage_connect_1→Phage_H_T_join→HK97-gp10_like→DUF3168→Phage_TTP_11→Phage_TAC_13→?→SPRY+X*→?→Phage-tail-tape→ConA-repeats→                 | SPRY+X           | 657  | ADH94_RS22020 | Gammaproteobacteria | Stenotrophomonas maltophilia | hypothetical protein [Stenotrophomonas maltophilia].                | GCF_001071475.1 |
| WP_049450667.1 | Phage_connect_1→Phage_H_T_join→HK97-gp10_like→DUF3168→Phage_TTP_11→Phage_TAC_13→?→SPRY+X*→?→Phage-tail-tape→?→?→?→  <-SRAP                | SPRY+X           | 656  | EGS96_RS20790 | Gammaproteobacteria | Stenotrophomonas maltophilia | hypothetical protein [Stenotrophomonas maltophilia].                | GCF_001071195.1 |
| WP_049454514.1 | Phage_connect_1→Phage_H_T_join→HK97-gp10_like→DUF3168→Phage_TTP_11→Phage_TAC_13→?→SPRY+X*→?→?→Phage-tail-tape→ConA-repeats→?→?→?→  <-SRAP | SPRY+X           | 658  | ADF89_RS18240 | Gammaproteobacteria | Stenotrophomonas maltophilia | hypothetical protein [Stenotrophomonas maltophilia].                | GCF_001069005.1 |
| WP_049459324.1 | Phage_connect_1→Phage_H_T_join→HK97-gp10_like→DUF3168→Phage_TTP_11→Phage_TAC_13→?→SPRY+X*→?→?→Phage-tail-tape→ConA-repeats→               | SPRY+X           | 657  | ADM04_RS16360 | Gammaproteobacteria | Stenotrophomonas maltophilia | hypothetical protein [Stenotrophomonas maltophilia].                | GCF_001074705.1 |
| WP_049736558.1 | SUN→Laminin_G_3+SPRY*→                                                                                                                    | Laminin_G_3+SPRY | 822  | BRE01_RS08970 | Firmicutes          | Brevibacillus reuszeri       | hypothetical protein [Brevibacillus reuszeri].                      | GCF_006540225.1 |
| WP_051447145.1 | SUN→SPRY+SUN→SUN→SPRY+SUN→Laminin_G_3→Disaggr_repeat→                                                                                     | SPRY+SUN         | 421  | C170_RS30045  | Firmicutes          | Paenibacillus sp. FSL H7-689 | discoidin domain-containing protein [Paenibacillus sp. FSL H7-689]. | GCF_000517905.1 |
| WP_051447146.1 | -                                                                                                                                         | -                | 399  | C170_RS30050  | Firmicutes          | Paenibacillus sp. FSL H7-689 | discoidin domain-containing protein [Paenibacillus sp. FSL H7-689]. | GCF_000517905.1 |
| WP_051449672.1 | -                                                                                                                                         | -                | 402  | C161_RS31475  | Firmicutes          | Paenibacillus sp. FSL R5-192 | hypothetical protein [Paenibacillus sp. FSL R5-192].                | GCF_000517845.1 |
| WP_051626263.1 | <-REC+OmpR-HTH<-?<-OBfold<-?<-?  ?→  <-?  SIG+SPRY*→                                                                                      | SIG+SPRY         | 653  | EP01_RS18270  | Oligoflexia         | Bdellovibrio bacteriovorus   | hypothetical protein [Bdellovibrio bacteriovorus].                  | GCF_000691605.1 |

| acc            | operon                                                                                                                                              | architecture | len | gen.name         | taxend              | species                         | define                                                                      | gca             |
|----------------|-----------------------------------------------------------------------------------------------------------------------------------------------------|--------------|-----|------------------|---------------------|---------------------------------|-----------------------------------------------------------------------------|-----------------|
| WP_052310845.1 | -                                                                                                                                                   | -            | 229 | WG8_RS02660      | Firmicutes          | Paenibacillus sp. Aloe-11       | hypothetical protein, partial [Paenibacillus sp. Aloe-11].                  | GCF_000245715.1 |
| WP_053324515.1 | <-ABhydrolase<-Polbetant  ACET→ Cupin_2→ ABhydrolase→  <-DUF2935<-?  SIG+SPRY→  <-PSE  ?→ SIG+SPRY→  <-Glycos_transf_2                              | SIG+SPRY     | 373 | BK119_RS14050    | Firmicutes          | Paenibacillus                   | MULTISPECIES: hypothetical protein [Paenibacillus].                         | GCF_001922145.1 |
| WP_053324516.1 | <-ABhydrolase<-Polbetant  ACET→ Cupin_2→ ABhydrolase→  <-DUF2935<-?  SIG+SPRY*→?→ SIG+SPRY→ PSE→  <-Glycos_transf_2                                 | SIG+SPRY     | 328 | ABE82_RS02500    | Firmicutes          | Paenibacillus peoriae           | hypothetical protein [Paenibacillus peoriae].                               | GCF_001272655.2 |
| WP_053497216.1 | Phage_connect_1→ Phage_H_T_join→ HK97-gp10_like→ DUF3168→ Phage_TTP_11→ Phage_TAC_13→?→ SPRY+X*→?→?→ Phage-tail-tape→ ConA-repeats→ ConA→?→  <-SRAP | SPRY+X       | 655 | ABW42_RS03390    | Gammaproteobacteria | Stenotrophomonas maltophilia    | hypothetical protein [Stenotrophomonas maltophilia].                        | GCF_001276345.1 |
| WP_053519524.1 | Phage_connect_1→ Phage_H_T_join→ HK97-gp10_like→ DUF3168→ Phage_TTP_11→ Phage_TAC_13→?→ SPRY+X*→?→ Phage-tail-tape→ ConA-repeats→                   | SPRY+X       | 655 | ABW43_RS14405    | Gammaproteobacteria | Stenotrophomonas maltophilia    | hypothetical protein [Stenotrophomonas maltophilia].                        | GCF_001276355.1 |
| WP_053595626.1 | SUN→ SPRY+SUN*→ SUN→ SUN→ Laminin_G_3→ Disaggr_repeat→                                                                                              | SPRY+SUN     | 413 | AN161_RS17530    | Firmicutes          | Lysinibacillus sp. FJAT-14222   | discoidin domain-containing protein [Lysinibacillus sp. FJAT-14222].        | GCF_001278875.1 |
| WP_054136806.1 | <-SIG+IG<-?  ?→?→?→  <-?<-?  SUN+SPRY*→                                                                                                             | SUN+SPRY     | 466 | IP80_RS13885     | Betaproteobacteria  | unclassified Betaproteobacteria | MULTISPECIES: tautomerase family protein [unclassified Betaproteobacteria]. | GCF_001295865.1 |
| WP_054704414.1 | SPRY+TM*→ SUN→ SUN→ Laminin_G_3→ Disaggr_repeat→                                                                                                    | SPRY+TM      | 211 | JCM16419_RS00705 | Firmicutes          | Paenibacillus pinihumi          | hypothetical protein [Paenibacillus pinihumi].                              | GCF_001312305.1 |
| WP_058710989.1 | HTH_20→  <-Trypsin<-ABhydrolase  ACET→  <-DUF2935<-PSE  SIG+SPRY*→                                                                                  | SIG+SPRY     | 306 | NS115_RS07620    | Firmicutes          | Paenibacillus                   | MULTISPECIES: hypothetical protein [Paenibacillus].                         | GCF_002872435.1 |
| WP_058830612.1 | HTH_20→  <-Trypsin<-ABhydrolase  ACET→  <-DUF2935<-?  SIG+SPRY*→                                                                                    | SIG+SPRY     | 339 | AVK83_RS16520    | Firmicutes          | Paenibacillus polymyxa          | hypothetical protein [Paenibacillus polymyxa].                              | GCF_001481575.1 |
| WP_058981995.1 | Phage_connect_1→ Phage_H_T_join→ HK97-gp10_like→ DUF3168→ Phage_TTP_11→ Phage_TAC_13→?→ SPRY+X*→?→?→?→ Phage-tail-tape→ ConA-repeats→               | SPRY+X       | 657 | BN1263_RS14155   | Gammaproteobacteria | Stenotrophomonas maltophilia    | hypothetical protein [Stenotrophomonas maltophilia].                        | GCF_001499715.1 |
| WP_059064521.1 | Phage_connect_1→ Phage_H_T_join→ HK97-gp10_like→ DUF3168→ Phage_TTP_11→ Phage_TAC_13→?→ SPRY+X*→?→ Phage-tail-tape→ ConA-repeats→?→ SRAP→           | SPRY+X       | 655 | AV528_RS10010    | Gammaproteobacteria | Stenotrophomonas maltophilia    | hypothetical protein [Stenotrophomonas maltophilia].                        | GCF_001499755.1 |
| WP_063211944.1 | HTH_20→  <-ABhydrolase<-?  ACET→ Cupin_2→ SIG+SPRY*→                                                                                                | SIG+SPRY     | 337 | AV545_RS14475    | Firmicutes          | Paenibacillus jamilae           | hypothetical protein [Paenibacillus jamilae].                               | GCF_001619755.1 |
| WP_064201871.1 | SPRY*→?→?→?→  <-?<-?<-?<-ABC-ATPase                                                                                                                 | SPRY         | 894 | A4S11_RS18990    | Firmicutes          | Brevibacillus brevis            | hypothetical protein [Brevibacillus brevis].                                | GCF_001649505.1 |
| WP_064796708.1 | HTH_20→  <-ABhydrolase<-Polbetant  ACET→ Cupin_2→  <-?  SIG+SPRY*→                                                                                  | SIG+SPRY     | 314 | A9P44_RS12255    | Firmicutes          | Paenibacillus polymyxa          | hypothetical protein [Paenibacillus polymyxa].                              | GCF_001663585.1 |
| WP_065179322.1 | Phage_connect_1→ Phage_H_T_join→ HK97-gp10_like→ DUF3168→ Phage_TTP_11→ Phage_TAC_13→?→ SPRY+X*→?→ Phage-tail-tape→                                 | SPRY+X       | 655 | A9K70_RS20570    | Gammaproteobacteria | Stenotrophomonas maltophilia    | hypothetical protein [Stenotrophomonas maltophilia].                        | GCF_001676395.1 |
| WP_065181897.1 | Phage_connect_1→ Phage_H_T_join→ HK97-gp10_like→ DUF3168→ Phage_TTP_11→ Phage_TAC_13→?→ SPRY+X*→  <-?  ?→?→ Phage-tail-tape→ ConA-repeats→          | SPRY+X       | 655 | A9K56_RS08050    | Gammaproteobacteria | Stenotrophomonas maltophilia    | hypothetical protein [Stenotrophomonas maltophilia].                        | GCF_001676315.1 |

| acc            | operon                                                                                                                                                | architecture     | len | gen.name      | taxend              | species                      | define                                                           | gca             |
|----------------|-------------------------------------------------------------------------------------------------------------------------------------------------------|------------------|-----|---------------|---------------------|------------------------------|------------------------------------------------------------------|-----------------|
| WP_065200553.1 | Phage_connect_1→ Phage_H_T_join→ HK97-gp10_like→ DUF3168→ Phage_TTP_11→ Phage_TAC_13→?→ SPRY+X*→  <-?  ?→?→?→<br>Phage-tail-tape→ ConA-repeats→ ConA→ | SPRY+X           | 655 | A9K58_RS17510 | Gamma               | Stenotrophomonas maltophilia | hypothetical protein [Stenotrophomonas maltophilia].             | GCF_001676385.1 |
| WP_068434738.1 | Cluster93_5clades→ Laminin_G_3+SPRY*→?→?→?→?→  <-?<-Cluster297_2clades<-EMAP                                                                          | Laminin_G_3+SPRY | 467 | XM1_RS14675   | Alphaproteobacteria | Magnetospirillum sp. XM-1    | hypothetical protein [Magnetospirillum sp. XM-1].                | GCF_001511835.1 |
| WP_068499071.1 | <-SUN<-?<-?  SIG+SPRY*→                                                                                                                               | SIG+SPRY         | 378 | BAZ21_RS08685 | Firmicutes          | Paenibacillus kribbensis     | hypothetical protein [Paenibacillus kribbensis].                 | GCF_001705305.1 |
| WP_068504121.1 | <-ABhydrolase  ?→  <-?  SIG+SPRY*→  <-PSE  SUN→                                                                                                       | SIG+SPRY         | 308 | BAZ21_RS19160 | Firmicutes          | Paenibacillus kribbensis     | hypothetical protein [Paenibacillus kribbensis].                 | GCF_001705305.1 |
| WP_068940847.1 | SUN→ SPRY+SUN→ <i>SPRY</i> → Disaggr_repeat→                                                                                                          | SPRY+SUN         | 698 | A7312_RS18605 | Firmicutes          | Paenibacillus polymyxa       | hypothetical protein [Paenibacillus polymyxa].                   | GCF_001707685.1 |
| WP_068940849.1 | -                                                                                                                                                     | -                | 419 | A7312_RS18610 | Firmicutes          | Paenibacillus polymyxa       | hypothetical protein [Paenibacillus polymyxa].                   | GCF_001707685.1 |
| WP_068941209.1 | -                                                                                                                                                     | -                | 320 | BK119_RS14035 | Firmicutes          | Paenibacillus                | MULTISPECIES: hypothetical protein [Paenibacillus].              | GCF_001922145.1 |
| WP_069010793.1 | HTH_20→  <-ABhydrolase<-Polbetant  ACET→ Cupin_2→ ABhydrolase→  <-DUF2935  SIG+SPRY*→?→  <-Glycos_transf_2                                            | SIG+SPRY         | 346 | A7311_RS06950 | Firmicutes          | Paenibacillus polymyxa       | hypothetical protein [Paenibacillus polymyxa].                   | GCF_001709075.1 |
| WP_069481585.1 | SUN+SPRY→?→?→?→ <i>SUN</i> → <i>SPRY</i> + <i>SUN</i> →                                                                                               | SUN+SPRY         | 559 | BG258_RS12185 | Firmicutes          | Lysinibacillus fusiformis    | discoidin domain-containing protein [Lysinibacillus fusiformis]. | GCF_001726065.1 |
| WP_069481589.1 | -                                                                                                                                                     | -                | 403 | BG258_RS12205 | Firmicutes          | Lysinibacillus fusiformis    | hypothetical protein [Lysinibacillus fusiformis].                | GCF_001726065.1 |
| WP_071558628.1 | <-SUN  SIG+SPRY*→  <-?<-?<-?<-?<-?<-Phage_holin_4_1                                                                                                   | SIG+SPRY         | 334 | CG775_RS21655 | Firmicutes          | Paenibacillus polymyxa       | hypothetical protein [Paenibacillus polymyxa].                   | GCF_001874425.3 |
| WP_071639359.1 | HTH_20→  <-ABhydrolase<-Polbetant  ACET→ Cupin_2→ ABhydrolase→  <-DUF2935  SIG+SPRY→?→ <i>SIG</i> + <i>SPRY</i> →<br>PSE→  <-Glycos_transf_2          | SIG+SPRY         | 373 | PPYC1_RS02475 | Firmicutes          | Paenibacillus polymyxa       | hypothetical protein [Paenibacillus polymyxa].                   | GCF_001874405.2 |
| WP_071639361.1 | -                                                                                                                                                     | -                | 323 | PPYC1_RS02485 | Firmicutes          | Paenibacillus polymyxa       | hypothetical protein [Paenibacillus polymyxa].                   | GCF_001874405.2 |
| WP_072733996.1 | SUN→ SUN→ SUN→ TM+SPRY+SUN→ <i>SPRY</i> → Disaggr_repeat→                                                                                             | TM+SPRY+SUN      | 708 | BUA17_RS14040 | Firmicutes          | Paenibacillus sp. ov031      | hypothetical protein [Paenibacillus sp. ov031].                  | GCF_900143165.1 |
| WP_072733997.1 | -                                                                                                                                                     | -                | 422 | BUA17_RS14045 | Firmicutes          | Paenibacillus sp. ov031      | discoidin domain-containing protein [Paenibacillus sp. ov031].   | GCF_900143165.1 |
| WP_075141582.1 | Cluster216_2clades→?→?→?→ SUN→ SPRY*→ PSE→ SUN→ SUN→ TM→ Cluster104_2clades→?→?→35exo→                                                                | SPRY             | 447 | RSJ3_RS04310  | Firmicutes          | Clostridium botulinum        | cell adhesion protein [Clostridium botulinum].                   | GCF_001921965.1 |
| WP_076158833.1 | <-ABhydrolase<-Polbetant  ACET→ Cupin_2→ ABhydrolase→  <-DUF2935  SIG+SPRY*→  <-PSE  ?→ PSE→  <-Glycos_transf_2                                       | SIG+SPRY         | 301 | BK134_RS12705 | Firmicutes          | Paenibacillus peoriae        | hypothetical protein [Paenibacillus peoriae].                    | GCF_001956115.1 |

| acc            | operon                                                                                                                            | architecture                                                 | len  | gen.name       | taxend              | species                      | define                                                                           | gca             |
|----------------|-----------------------------------------------------------------------------------------------------------------------------------|--------------------------------------------------------------|------|----------------|---------------------|------------------------------|----------------------------------------------------------------------------------|-----------------|
| WP_076172386.1 | Cluster171_2clades→?→?→ Cluster143_2clades→?→?→ PSE→ SUN→ SPRY*→ SUN→ TM→ Cluster104_2clades→?→?→35exo→ Cluster112_2clades→       | SPRY                                                         | 465  | N487_RS14900   | Firmicutes          | Clostridium botulinum        | cell adhesion protein [Clostridium botulinum].                                   | GCF_000710975.1 |
| WP_076252374.1 | SUN→ SPRY+SUN*→ SUN→ SUN→ Laminin_G_3→ Disaggr_repeat→                                                                            | SPRY+SUN                                                     | 403  | BK136_RS15140  | Firmicutes          | Paenibacillus amylolyticus   | hypothetical protein [Paenibacillus amylolyticus].                               | GCF_001956175.1 |
| WP_076265166.1 | <-ABhydrolase<-Polbetant  ACET→ Cupin_2→ ABhydrolase→  <-DUF2935<-?  SIG+SPRY*→  <-?  ?→ SIG+SPRY→  <-Glycos_transf_2             | SIG+SPRY                                                     | 320  | BK143_RS19680  | Firmicutes          | Paenibacillus peoriae        | hypothetical protein [Paenibacillus peoriae].                                    | GCF_001956225.1 |
| WP_076293278.1 | HTH_20→  <-PSE<-ABhydrolase<-Polbetant  ACET→ Cupin_2→ ABhydrolase→  <-DUF2935  SIG+SPRY*→  <-?  ?→ PSE→  <-Glycos_transf_2       | SIG+SPRY                                                     | 326  | BK135_RS10440  | Firmicutes          | Paenibacillus peoriae        | hypothetical protein [Paenibacillus peoriae].                                    | GCF_001956155.1 |
| WP_076295423.1 | <-ABhydrolase<-Polbetant  ACET→ Cupin_2→ ABhydrolase→  <-DUF2935<-?  SIG+SPRY→  <-?  ?→ SIG+SPRY→  <-Glycos_transf_2              | SIG+SPRY                                                     | 331  | BK145_RS14470  | Firmicutes          | Paenibacillus peoriae        | hypothetical protein [Paenibacillus peoriae].                                    | GCF_001956235.1 |
| WP_076318343.1 | SUN→ SUN→ SUN→ SPRY+SUN*→ Laminin_G_3→ Disaggr_repeat→                                                                            | SPRY+SUN                                                     | 412  | BK124_RS08255  | Firmicutes          | Paenibacillus amylolyticus   | hypothetical protein [Paenibacillus amylolyticus].                               | GCF_001955995.1 |
| WP_076327021.1 | SUN→ SPRY+SUN*→ SUN→ Laminin_G_3→ Disaggr_repeat→                                                                                 | SPRY+SUN                                                     | 414  | BK129_RS03095  | Firmicutes          | Paenibacillus amylolyticus   | discoidin domain-containing protein [Paenibacillus amylolyticus].                | GCF_001956035.1 |
| WP_079564340.1 | SUN→ SPRY+SUN→ SUN→ SUN→ SPRY+SUN→ SUN→ SUN→ SUN→                                                                                 | SPRY+SUN                                                     | 485  | B5X66_RS24790  | Firmicutes          | unclassified Lysinibacillus  | MULTISPECIES: hypothetical protein [unclassified Lysinibacillus].                | GCF_900167885.1 |
| WP_079564349.1 | -                                                                                                                                 | -                                                            | 413  | B5X66_RS24805  | Firmicutes          | unclassified Lysinibacillus  | MULTISPECIES: discoidin domain-containing protein [unclassified Lysinibacillus]. | GCF_900167885.1 |
| WP_079564406.1 | SUN→ SUN→ SUN→ SPRY+SUN*→?→ SUN→ SUN→ SUN→ SUN→ SUN→                                                                              | SPRY+SUN                                                     | 389  | B5X66_RS24915  | Firmicutes          | unclassified Lysinibacillus  | MULTISPECIES: discoidin domain-containing protein [unclassified Lysinibacillus]. | GCF_900167885.1 |
| WP_080291782.1 | DUF3168→ Phage_TTP_11→ Phage_TAC_13→?→ SPRY+X*→?→?→ Phage-tail-tape→ ConA-repeats→                                                | SPRY+X                                                       | 655  | LI87_RS0109275 | Gammaproteobacteria | Stenotrophomonas maltophilia | hypothetical protein [Stenotrophomonas maltophilia].                             | GCF_000758465.1 |
| WP_080639352.1 | RHS_repeat+RHS_repeat+RHS_repeat+RHS_repeat+Laminin_G_3+SPRY*→?→?→ PSE→ PSE→35exo→                                                | RHS_repeat+RHS_repeat+RHS_repeat+RHS_repeat+Laminin_G_3+SPRY | 2000 | YUK_RS0107305  | Gammaproteobacteria | Teredinibacter turnerae      | hypothetical protein [Teredinibacter turnerae].                                  | GCF_000379165.1 |
| WP_080974705.1 | Cluster143_2clades→?→?→?→?→ SPRY→ SPRY*→ PSE→ TM→ Cluster104_2clades→                                                             | SPRY                                                         | 311  | ADC50_RS20320  | Firmicutes          | Clostridium sporogenes       | hypothetical protein [Clostridium sporogenes].                                   | GCF_001058825.1 |
| WP_081280966.1 | Phage_connect_1→ Phage_H_T_join→ HK97-gp10_like→ DUF3168→ Phage_TTP_11→ Phage_TAC_13→?→ SPRY+X*→?→?→ Phage-tail-tape→             | SPRY+X                                                       | 655  | A9K69_RS19730  | Gammaproteobacteria | Stenotrophomonas maltophilia | hypothetical protein [Stenotrophomonas maltophilia].                             | GCF_001676445.1 |
| WP_084315242.1 | SIG+TM+TM+TM+TM+TM+TM+TM+TM→ SIG+TM+TM+TM+TM+TM+TM+TM+TM→ ABC-ATPase→ SIG+TM+TM+TM+TM+ABC-ATPase→  <-?  ?→ SPRY+Big_2*→?→?→ ACET→ | SPRY+Big_2                                                   | 535  | BR69_RS21395   | Firmicutes          | Clostridium hydrogeniformans | Ig domain-containing protein [Clostridium hydrogeniformans].                     | GCF_000686705.1 |
| WP_084575678.1 | EMAP→ Cluster297_2clades→?→?→?→ SIG+SPRY*→?→?→?→?→ SIG+METHYLASE→                                                                 | SIG+SPRY                                                     | 349  | B9A22_RS10460  | Firmicutes          | Sporomusa malonica           | hypothetical protein [Sporomusa malonica].                                       | GCF_900176355.1 |

| acc            | operon                                                                                                                                          | architecture          | len  | gen.name       | taxend              | species                                   | define                                                                     | gca             |
|----------------|-------------------------------------------------------------------------------------------------------------------------------------------------|-----------------------|------|----------------|---------------------|-------------------------------------------|----------------------------------------------------------------------------|-----------------|
| WP_085321805.1 | Cluster171_2clades→?→?→ Cluster143_2clades→?→?→ PSE→ SUN→ SPRY*→ SUN→ TM→ Cluster104_2clades→?→?→35exo→ Cluster112_2clades→                     | SPRY                  | 447  | B2M06_RS15395  | Firmicutes          | Clostridium botulinum                     | cell adhesion protein [Clostridium botulinum].                             | GCF_002866045.1 |
| WP_085899262.1 | Phage_T7_tail→ SPRY*→                                                                                                                           | SPRY                  | 1359 | BKB51_RS01170  | Alphaproteobacteria | Kiloniella majae                          | hypothetical protein [Kiloniella majae].                                   | GCF_002118315.1 |
| WP_087445183.1 | SUN→ SPRY+SUN*→ SUN→ Laminin_G_3→ Disaggr_repeat→ Phage_holin_4_1→?→ SIG+ConA+beta-propeller→                                                   | SPRY+SUN              | 430  | FLT43_09110    | Firmicutes          | Paenibacillus thiaminolyticus             | hypothetical protein [Paenibacillus thiaminolyticus].                      | -               |
| WP_087803178.1 | Phage_connect_1→ Phage_H_T_join→ HK97-gp10_like→ DUF3168→ Phage_TTP_11→ Phage_TAC_13→?→ SPRY+X*→?→?→ Phage-tail-tape→ ConA-repeats→?→?→  <-SRAP | SPRY+X                | 657  | B7H27_RS11730  | Gammaproteobacteria | Stenotrophomonas maltophilia              | hypothetical protein [Stenotrophomonas maltophilia].                       | GCF_002189565.1 |
| WP_088432438.1 | Phage_connect_1→ Phage_H_T_join→ HK97-gp10_like→ DUF3168→ Phage_TTP_11→ Phage_TAC_13→?→ SPRY+X*→?→?→ Phage-tail-tape→ ConA-repeats→             | SPRY+X                | 658  | CEE60_RS02675  | Gammaproteobacteria | Stenotrophomonas maltophilia              | hypothetical protein [Stenotrophomonas maltophilia].                       | GCF_002205165.1 |
| WP_089986629.1 | SUN→ SPRY+SUN*→ DISCOIDIN→ SUN→ SUN→ SUN→ Laminin_G_3→ Disaggr_repeat→                                                                          | SPRY+SUN              | 433  | BLP61_RS17210  | Firmicutes          | Lysinibacillus fusiformis                 | discoidin domain-containing protein [Lysinibacillus fusiformis].           | GCF_900102355.1 |
| WP_090738921.1 | <-SUN<-?<-PSE  SIG+SPRY*→                                                                                                                       | SIG+SPRY              | 373  | BN1546_RS23290 | Firmicutes          | Paenibacillus sp. Mc5Re-14                | hypothetical protein [Paenibacillus sp. Mc5Re-14].                         | GCF_001049835.1 |
| WP_090920079.1 | SUN→ SUN→ SPRY+SUN*→ Laminin_G_3→ Disaggr_repeat→                                                                                               | SPRY+SUN              | 412  | BLQ13_RS12675  | Firmicutes          | Paenibacillus polysaccharolyticus         | discoidin domain-containing protein [Paenibacillus polysaccharolyticus].   | GCF_900102085.1 |
| WP_092074738.1 | SPRY+Big_2*→                                                                                                                                    | SPRY+Big_2            | 341  | H5X37_RS17715  | Firmicutes          | Dendrosporobacter quercicolus             | Ig-like domain-containing protein [Dendrosporobacter quercicolus].         | GCF_900104455.1 |
| WP_093534303.1 | Phage_connect_1→ Phage_H_T_join→ HK97-gp10_like→ DUF3168→ Phage_TTP_11→ Phage_TAC_13→?→ SPRY+X*→?→?→ Phage-tail-tape→                           | SPRY+X                | 655  | BQ2375_RS10775 | Gammaproteobacteria | Stenotrophomonas rhizophila               | hypothetical protein [Stenotrophomonas rhizophila].                        | GCF_900095765.1 |
| WP_094156505.1 | <-ABhydrolase<-?  SIG+SPRY→ SIG+SPRY→ SUN→  <-PSE<-Glycos_transf_2                                                                              | SIG+SPRY              | 358  | B4V02_RS22570  | Firmicutes          | Paenibacillus kribbensis                  | hypothetical protein [Paenibacillus kribbensis].                           | GCF_002240415.1 |
| WP_094936690.1 | SUN→ SPRY+SUN*→ SUN→ Laminin_G_3→ Disaggr_repeat→                                                                                               | SPRY+SUN              | 423  | CA599_RS04535  | Firmicutes          | Paenibacillus taichungensis               | discoidin domain-containing protein [Paenibacillus taichungensis].         | GCF_002264305.1 |
| WP_095523199.1 | Cluster180_2clades→?→?→ Cluster242_2clades→?→?→?→ VWA+Phage-tail_3+SPRY*→?→?→ DAM→                                                              | VWA+Phage-tail_3+SPRY | 1093 | BSR46_RS01740  | Betaproteobacteria  | Candidatus Dactylopiibacterium carminicum | VWA domain-containing protein [Candidatus Dactylopiibacterium carminicum]. | GCF_002284975.1 |
| WP_095529535.1 | Cluster180_2clades→?→?→ Cluster242_2clades→?→?→?→ VWA+Phage-tail_3+SPRY*→?→?→ DAM→                                                              | VWA+Phage-tail_3+SPRY | 1093 | CGU28_RS03090  | Betaproteobacteria  | Candidatus Dactylopiibacterium carminicum | VWA domain-containing protein [Candidatus Dactylopiibacterium carminicum]. | GCF_002284935.1 |

| acc            | operon                                                                                                                                          | architecture | len | gen.name      | taxend              | species                               | define                                                        | gca             |
|----------------|-------------------------------------------------------------------------------------------------------------------------------------------------|--------------|-----|---------------|---------------------|---------------------------------------|---------------------------------------------------------------|-----------------|
| WP_097012028.1 | Phage_T7_tail→ SUN+SPRY*→ Phage_tail_APC→                                                                                                       | SUN+SPRY     | 749 | DPRO_RS10715  | Deltaproteobacteria | Pseudodesulfovibrio profundus         | hypothetical protein [Pseudodesulfovibrio profundus].         | GCF_900217235.1 |
| WP_097053084.1 | SPRY*→                                                                                                                                          | SPRY         | 749 | CRO34_RS20720 | Alphaproteobacteria | Thalassospira xiamenensis             | hypothetical protein [Thalassospira xiamenensis].             | GCF_900217835.1 |
| WP_099470440.1 | Phage_connect_1→ Phage_H_T_join→ HK97-gp10_like→ DUF3168→ Phage_TTP_11→ Phage_TAC_13→?→ SPRY+X*→?→?→ Phage-tail-tape→ ConA-repeats→?→?→ SRAP→   | SPRY+X       | 657 | BRB94_RS07965 | Gammaproteobacteria | Stenotrophomonas maltophilia          | hypothetical protein [Stenotrophomonas maltophilia].          | GCF_002739365.1 |
| WP_099473308.1 | Phage_connect_1→ Phage_H_T_join→ HK97-gp10_like→ DUF3168→ Phage_TTP_11→ Phage_TAC_13→?→ SPRY+X*→?→?→ Phage-tail-tape→ ConA-repeats→?→?→ SRAP→   | SPRY+X       | 657 | BRB96_RS16380 | Gammaproteobacteria | Stenotrophomonas maltophilia          | hypothetical protein [Stenotrophomonas maltophilia].          | GCF_002739315.1 |
| WP_099475740.1 | Phage_TAC_13→?→ SPRY+X*→?→ Phage-tail-tape→?→?→?→ SRAP→                                                                                         | SPRY+X       | 657 | BRB49_RS05320 | Gammaproteobacteria | Stenotrophomonas maltophilia          | hypothetical protein [Stenotrophomonas maltophilia].          | GCF_002739555.1 |
| WP_099491760.1 | Phage_connect_1→ Phage_H_T_join→ HK97-gp10_like→ DUF3168→ Phage_TTP_11→ Phage_TAC_13→?→ SPRY+X*→?→?→ Phage-tail-tape→ ConA-repeats→?→?→  <-SRAP | SPRY+X       | 657 | BRB88_RS10470 | Gammaproteobacteria | Stenotrophomonas maltophilia          | hypothetical protein [Stenotrophomonas maltophilia].          | GCF_002739275.1 |
| WP_099494832.1 | Phage_connect_1→ Phage_H_T_join→ HK97-gp10_like→ DUF3168→ Phage_TTP_11→ Phage_TAC_13→?→ SPRY+X*→?→ Phage-tail-tape→ ConA-repeats→ ConA→         | SPRY+X       | 655 | BRC08_RS17670 | Gammaproteobacteria | Stenotrophomonas maltophilia          | hypothetical protein [Stenotrophomonas maltophilia].          | GCF_002739465.1 |
| WP_099529564.1 | Phage_connect_1→ Phage_H_T_join→ HK97-gp10_like→ DUF3168→ Phage_TTP_11→ Phage_TAC_13→?→ PSE→ SPRY+X*→?→ Phage-tail-tape→ ConA-repeats→          | SPRY+X       | 657 | BRB33_RS00490 | Gammaproteobacteria | Stenotrophomonas maltophilia          | hypothetical protein [Stenotrophomonas maltophilia].          | GCF_002738715.1 |
| WP_099539415.1 | Phage_connect_1→ Phage_H_T_join→ HK97-gp10_like→ DUF3168→ Phage_TTP_11→ Phage_TAC_13→?→ SPRY+X*→?→ Phage-tail-tape→ ConA-repeats→               | SPRY+X       | 657 | BRB39_RS15215 | Gammaproteobacteria | Stenotrophomonas maltophilia          | hypothetical protein [Stenotrophomonas maltophilia].          | GCF_002738665.1 |
| WP_099539896.1 | Phage_connect_1→ Phage_H_T_join→ HK97-gp10_like→ DUF3168→ Phage_TTP_11→ Phage_TAC_13→?→ SPRY+X*→?→ Phage-tail-tape→                             | SPRY+X       | 656 | BRB48_RS14865 | Gammaproteobacteria | Stenotrophomonas maltophilia          | hypothetical protein [Stenotrophomonas maltophilia].          | GCF_002738885.1 |
| WP_099553167.1 | Phage_connect_1→ Phage_H_T_join→ HK97-gp10_like→ DUF3168→ Phage_TTP_11→ Phage_TAC_13→?→ SPRY+X*→?→?→ Phage-tail-tape→ ConA-repeats→?→?→  <-SRAP | SPRY+X       | 657 | BRC04_RS15490 | Gammaproteobacteria | Stenotrophomonas maltophilia          | hypothetical protein [Stenotrophomonas maltophilia].          | GCF_002739455.1 |
| WP_099605638.1 | Phage_connect_1→ Phage_H_T_join→ HK97-gp10_like→ DUF3168→ Phage_TTP_11→ Phage_TAC_13→?→ SPRY+X*→?→ Phage-tail-tape→ ConA-repeats→?→?→  <-SRAP   | SPRY+X       | 657 | BRC06_RS15605 | Gammaproteobacteria | Stenotrophomonas maltophilia          | hypothetical protein [Stenotrophomonas maltophilia].          | GCF_002740185.1 |
| WP_099654222.1 | SPRY*→                                                                                                                                          | SPRY         | 991 | BJV55_RS14285 | Gammaproteobacteria | Rhodanobacter sp. TND4EH1             | hypothetical protein [Rhodanobacter sp. TND4EH1].             | GCF_002749725.1 |
| WP_099854778.1 | SUN→ SPRY+SUN*→ SUN→ SUN→ SUN→ Laminin_G_3→ Disaggr_repeat→                                                                                     | SPRY+SUN     | 425 | CS562_RS07475 | Firmicutes          | Paenibacillus sp. LK1                 | discoidin domain-containing protein [Paenibacillus sp. LK1].  | GCF_002750415.1 |
| WP_099858289.1 | SPRY+SUN*→ SUN→ Laminin_G_3→ Disaggr_repeat→ Phage_holin_4_1→                                                                                   | SPRY+SUN     | 410 | CS562_RS22615 | Firmicutes          | Paenibacillus sp. LK1                 | hypothetical protein [Paenibacillus sp. LK1].                 | GCF_002750415.1 |
| WP_100317531.1 | Phage-tail-tape→?→?→ SPRY+X*→?→ DAM→                                                                                                            | SPRY+X       | 655 | CO615_RS10755 | Gammaproteobacteria | Xanthomonadaceae bacterium NML75-0749 | hypothetical protein [Xanthomonadaceae bacterium NML75-0749]. | GCF_002798185.1 |

| acc            | operon                                                                                                                                    | architecture        | len  | gen.name      | taxend              | species                               | define                                                                   | gca             |
|----------------|-------------------------------------------------------------------------------------------------------------------------------------------|---------------------|------|---------------|---------------------|---------------------------------------|--------------------------------------------------------------------------|-----------------|
| WP_100438259.1 | Phage_connect_1→ Phage_H_T_join→ HK97-gp10_like→ DUF3168→ Phage_TTP_11→ Phage_TAC_13→?→ SPRY+X*→?→?→ Phage-tail-tape→ ConA-repeats→       | SPRY+X              | 658  | B9Y60_RS06960 | Gammaproteobacteria | Stenotrophomonas maltophilia          | hypothetical protein [Stenotrophomonas maltophilia].                     | GCF_002799135.1 |
| WP_100443561.1 | Phage_connect_1→ Phage_H_T_join→ HK97-gp10_like→ DUF3168→ Phage_TTP_11→ Phage_TAC_13→?→ SPRY+X*→?→ Phage-tail-tape→ ConA-repeats→         | SPRY+X              | 657  | B9Y57_RS09005 | Gammaproteobacteria | Stenotrophomonas maltophilia          | hypothetical protein [Stenotrophomonas maltophilia].                     | GCF_002798925.1 |
| WP_100474847.1 | Phage_connect_1→ Phage_H_T_join→ HK97-gp10_like→ DUF3168→ Phage_TTP_11→ Phage_TAC_13→?→ SPRY+X*→?→?→ Phage-tail-tape→                     | SPRY+X              | 657  | B9Y82_RS18595 | Gammaproteobacteria | Stenotrophomonas maltophilia          | hypothetical protein [Stenotrophomonas maltophilia].                     | GCF_002799155.1 |
| WP_102039859.1 | Glyco_hydro_16+SPRY*→                                                                                                                     | Glyco_hydro_16+SPRY | 1003 | CXF86_RS19745 | Gammaproteobacteria | Shewanella sp. GutCb                  | DUF1833 family protein [Shewanella sp. GutCb].                           | GCF_002836135.1 |
| WP_102945666.1 | Phage_H_T_join→ HK97-gp10_like→ DUF3168→ Phage_TTP_11→ Phage_TAC_13→?→ SPRY+X*→?→ Phage-tail-tape→                                        | SPRY+X              | 655  | C2U58_RS09715 | Gammaproteobacteria | Stenotrophomonas sp. VV52             | hypothetical protein [Stenotrophomonas sp. VV52].                        | GCF_002893095.1 |
| WP_103046829.1 | <-Trypsin<-ABhydrolase<-Polbetant  ACET→ Cupin_2→  <-DUF2935<-?  SIG+SPRY*→                                                               | SIG+SPRY            | 326  | C1T21_RS00825 | Firmicutes          | Paenibacillus sp. F4                  | hypothetical protein [Paenibacillus sp. F4].                             | GCF_002894905.1 |
| WP_103744628.1 | -                                                                                                                                         | -                   | 320  | CG775_RS10930 | Firmicutes          | Paenibacillus polymyxa                | hypothetical protein [Paenibacillus polymyxa].                           | GCF_002916985.1 |
| WP_103977131.1 | SUN→ SUN→ SUN→ SUN+SPRY*→ Disaggr_repeat→?→?→ Phage_holin_1→                                                                              | SUN+SPRY            | 980  | LYSIN_RS10210 | Firmicutes          | Lysinibacillus sphaericus             | hypothetical protein [Lysinibacillus sphaericus].                        | GCF_002923795.1 |
| WP_104497237.1 | HTH_20→  <-ABhydrolase<-Polbetant  ACET→ Cupin_2→  <-DUF2935  SIG+SPRY*→  <-?  ?→  <-Glycos_transf_2                                      | SIG+SPRY            | 332  | C5G87_RS19490 | Firmicutes          | Paenibacillus peoriae                 | hypothetical protein [Paenibacillus peoriae].                            | GCF_002937395.1 |
| WP_105407850.1 | SUN→ SPRY+SUN*→ SUN→ Laminin_G_3→ Disaggr_repeat→                                                                                         | SPRY+SUN            | 419  | C0Q44_RS13525 | Firmicutes          | Paenibacillus sp. PCH8                | hypothetical protein [Paenibacillus sp. PCH8].                           | GCF_002968835.1 |
| WP_106549337.1 | Phage_connect_1→ Phage_H_T_join→ HK97-gp10_like→ DUF3168→ Phage_TTP_11→ Phage_TAC_13→ SPRY+X*→  <-?  ?→ Phage-tail-tape→ ConA-repeats→    | SPRY+X              | 657  | CV100_RS06160 | Gammaproteobacteria | Stenotrophomonas maltophilia          | hypothetical protein [Stenotrophomonas maltophilia].                     | GCF_003015035.1 |
| WP_106891819.1 | SPRY*→?→?→ DAM→                                                                                                                           | SPRY                | 820  | C7S18_RS12140 | Gammaproteobacteria | Ahniella affigens                     | hypothetical protein [Ahniella affigens].                                | GCF_003015185.1 |
| WP_107951039.1 | SUN→ SPRY+SUN→ <i>SPRY+SUN</i> → SUN→ SUN→ Laminin_G_3→ Disaggr_repeat→?→?→ Phage_holin_1→                                                | SPRY+SUN            | 435  | C9J32_RS17875 | Firmicutes          | Lysinibacillus parviboronicapiens     | discoidin domain-containing protein [Lysinibacillus parviboronicapiens]. | GCF_003049605.1 |
| WP_107951040.1 | -                                                                                                                                         | -                   | 411  | C9J32_RS17880 | Firmicutes          | Lysinibacillus parviboronicapiens     | discoidin domain-containing protein [Lysinibacillus parviboronicapiens]. | GCF_003049605.1 |
| WP_107981750.1 | SPRY*→                                                                                                                                    | SPRY                | 401  | B5V90_RS01965 | Firmicutes          | Bacillus sporothermodurans            | hypothetical protein [Bacillus sporothermodurans].                       | GCF_003055065.1 |
| WP_108753440.1 | Phage_H_T_join→ HK97-gp10_like→ DUF3168→  <-?  Phage_TTP_11→ Phage_TAC_13→?→ SPRY+X*→?→?→ Phage-tail-tape→ ConA-repeats→ ConA→?→  <-SRAP  | SPRY+X              | 657  | C1933_RS11930 | Gammaproteobacteria | Stenotrophomonas sp. ZAC14D2_NAIMI4_6 | hypothetical protein [Stenotrophomonas sp. ZAC14D2_NAIMI4_6].            | GCF_003086875.1 |
| WP_108762304.1 | Phage_connect_1→ Phage_H_T_join→ HK97-gp10_like→ DUF3168→ Phage_TTP_11→ Phage_TAC_13→?→ SPRY+X*→?→?→ Phage-tail-tape→ ConA-repeats→ ConA→ | SPRY+X              | 657  | C1932_RS11845 | Gammaproteobacteria | Stenotrophomonas sp. YAU14D1_LEIMI4_1 | hypothetical protein [Stenotrophomonas sp. YAU14D1_LEIMI4_1].            | GCF_003086815.1 |

| acc            | operon                                                                                                                                              | architecture | len | gen.name      | taxend              | species                              | define                                                          | gca             |
|----------------|-----------------------------------------------------------------------------------------------------------------------------------------------------|--------------|-----|---------------|---------------------|--------------------------------------|-----------------------------------------------------------------|-----------------|
| WP_108767941.1 | Phage_connect_1→ Phage_H_T_join→ HK97-gp10_like→ DUF3168→ Phage_TTP_11→ Phage_TAC_13→?→ SPRY+X*→?→?→ Phage-tail-tape→ ConA-repeats→?→  <-SRAP       | SPRY+X       | 655 | C1925_RS05020 | Gammaproteobacteria | Stenotrophomonas sp. SAU14A_NAIMI4_5 | hypothetical protein [Stenotrophomonas sp. SAU14A_NAIMI4_5].    | GCF_003086795.1 |
| WP_109073515.1 | SIG+SPRY*→ Phage_tail_APC→?→ Phage_lysozyme→                                                                                                        | SIG+SPRY     | 399 | TSH20_RS03980 | Alphaproteobacteria | unclassified Azospirillum            | MULTISPECIES: hypothetical protein [unclassified Azospirillum]. | GCF_003115945.1 |
| WP_109150419.1 | SIG+SPRY*→ Phage_tail_APC→ Phage_lysozyme→ Cluster368_2clades→                                                                                      | SIG+SPRY     | 399 | TSO5_RS04345  | Alphaproteobacteria | Azospirillum sp. TSO5                | hypothetical protein [Azospirillum sp. TSO5].                   | GCF_003116065.1 |
| WP_109813956.1 | Phage_connect_1→ Phage_H_T_join→ HK97-gp10_like→ DUF3168→ Phage_TTP_11→ Phage_TAC_13→?→ SPRY+X*→  <-?  ?→?→ Phage-tail-tape→ ConA-repeats→          | SPRY+X       | 657 | DKY64_RS04935 | Gammaproteobacteria | Stenotrophomonas maltophilia         | hypothetical protein [Stenotrophomonas maltophilia].            | GCF_003172845.1 |
| WP_110895171.1 | -                                                                                                                                                   | -            | 698 | HUB98_RS06520 | Firmicutes          | Paenibacillus barcinonensis          | hypothetical protein [Paenibacillus barcinonensis].             | GCF_013347305.1 |
| WP_110932422.1 | SPRY+SUN*→ SUN→ Laminin_G_3→ Disaggr_repeat→ Phage_holin_4_1→                                                                                       | SPRY+SUN     | 419 | CZ379_RS15410 | Firmicutes          | Paenibacillus bouchesdurhonensis     | hypothetical protein [Paenibacillus bouchesdurhonensis].        | GCF_900155685.1 |
| WP_111008118.1 | Phage_connect_1→ Phage_H_T_join→ HK97-gp10_like→ DUF3168→ Phage_TTP_11→ Phage_TAC_13→?→ SPRY+X*→?→?→ Phage-tail-tape→ ConA-repeats→ ConA→           | SPRY+X       | 655 | A7X97_RS14925 | Gammaproteobacteria | Stenotrophomonas maltophilia         | hypothetical protein [Stenotrophomonas maltophilia].            | GCF_003244875.1 |
| WP_111096871.1 | Phage_connect_1→ Phage_H_T_join→ HK97-gp10_like→ DUF3168→ Phage_TTP_11→ Phage_TAC_13→?→ SPRY+X*→?→?→ Phage-tail-tape→ ConA-repeats→ ConA→?→  <-SRAP | SPRY+X       | 655 | A7X84_RS18825 | Gammaproteobacteria | Stenotrophomonas maltophilia         | hypothetical protein [Stenotrophomonas maltophilia].            | GCF_003244495.1 |
| WP_111113613.1 | Phage_connect_1→ Phage_H_T_join→ HK97-gp10_like→ DUF3168→ Phage_TTP_11→ Phage_TAC_13→?→ SPRY+X*→?→ Phage-tail-tape→ ConA-repeats→ ConA→?→ SRAP→     | SPRY+X       | 655 | A7X83_RS21130 | Gammaproteobacteria | Stenotrophomonas maltophilia         | hypothetical protein [Stenotrophomonas maltophilia].            | GCF_003244775.1 |
| WP_111118812.1 | Phage_connect_1→ Phage_H_T_join→ HK97-gp10_like→ DUF3168→ Phage_TTP_11→ Phage_TAC_13→?→ SPRY+X*→?→?→ Phage-tail-tape→ ConA-repeats→?→?→  <-SRAP     | SPRY+X       | 657 | A7X74_RS15970 | Gammaproteobacteria | Stenotrophomonas maltophilia         | hypothetical protein [Stenotrophomonas maltophilia].            | GCF_003244465.1 |
| WP_111176598.1 | Phage_connect_1→ Phage_H_T_join→ HK97-gp10_like→ DUF3168→ Phage_TTP_11→ Phage_TAC_13→?→ SPRY+X*→?→ Phage-tail-tape→ ConA-repeats→?→  <-SRAP         | SPRY+X       | 655 | A7X87_RS07275 | Gammaproteobacteria | Stenotrophomonas maltophilia         | hypothetical protein [Stenotrophomonas maltophilia].            | GCF_003244795.1 |
| WP_111187870.1 | Phage_connect_1→ Phage_H_T_join→ HK97-gp10_like→ DUF3168→ Phage_TTP_11→ Phage_TAC_13→ SPRY+X*→?→ Phage-tail-tape→ ConA-repeats→?→?→ SRAP→           | SPRY+X       | 657 | A7X60_RS00295 | Gammaproteobacteria | Stenotrophomonas maltophilia         | hypothetical protein [Stenotrophomonas maltophilia].            | GCF_003244645.1 |
| WP_111203746.1 | Phage_connect_1→ Phage_H_T_join→ HK97-gp10_like→ DUF3168→ Phage_TTP_11→ Phage_TAC_13→?→ SPRY+X*→?→?→ Phage-tail-tape→ ConA-repeats→?→?→ SRAP→       | SPRY+X       | 657 | A7X75_RS09430 | Gammaproteobacteria | Stenotrophomonas maltophilia         | hypothetical protein [Stenotrophomonas maltophilia].            | GCF_003244735.1 |
| WP_117310047.1 | Phage_H_T_join→ HK97-gp10_like→ DUF3168→  <-?  Phage_TTP_11→ Phage_TAC_13→?→ SPRY+X*→?→ Phage-tail-tape→ ConA-repeats→?→ SRAP→                      | SPRY+X       | 655 | D0Y85_RS07625 | Gammaproteobacteria | Stenotrophomonas sp. G4              | hypothetical protein [Stenotrophomonas sp. G4].                 | GCF_003428825.1 |
| WP_119554390.1 | SPRY*→                                                                                                                                              | SPRY         | 674 | D3H34_RS15355 | Betaproteobacteria  | Acidovorax cavernicola               | hypothetical protein [Acidovorax cavernicola].                  | GCF_003581445.1 |
| WP_119798183.1 | SUN→ SUN→?→ SPRY*→ Disaggr_repeat→?→ Phage_holin_4_1→                                                                                               | SPRY         | 707 | D3P07_RS00690 | Firmicutes          | Paenibacillus sp. 1011MAR3C5         | hypothetical protein [Paenibacillus sp. 1011MAR3C5].            | GCF_003591485.1 |
| WP_120033984.1 | SPRY*→?→?→ Phage_holin_1→                                                                                                                           | SPRY         | 411 | CJ483_RS08545 | Firmicutes          | Bacillus sp. PK3_68                  | hypothetical protein [Bacillus sp. PK3_68].                     | GCF_003600835.1 |

| acc            | operon                                                                                                                                                       | architecture                                                                                                                            | len  | gen.name      | taxend              | species                         | define                                                                              | gca             |
|----------------|--------------------------------------------------------------------------------------------------------------------------------------------------------------|-----------------------------------------------------------------------------------------------------------------------------------------|------|---------------|---------------------|---------------------------------|-------------------------------------------------------------------------------------|-----------------|
| WP_120225163.1 | Cluster165_3clades→?→  <?  ?→?→ SPRY*→                                                                                                                       | SPRY                                                                                                                                    | 554  | CLY44_RS11090 | Alphaproteobacteria | Thalassospira sp. DSM 26710     | hypothetical protein [Thalassospira sp. DSM 26710].                                 | GCF_003610215.1 |
| WP_120497558.1 | Phage_T7_tail→ SPRY*→                                                                                                                                        | SPRY                                                                                                                                    | 1175 | D9A03_RS12780 | Alphaproteobacteria | Kiloniella sp. EL199            | hypothetical protein [Kiloniella sp. EL199].                                        | GCF_900313065.1 |
| WP_120498928.1 | <-ACET  ?→?→?→?→?→ Beta-Roll+Beta-Roll+Beta-Roll+Beta-Roll+BetaPropeller+Beta-Roll+CADHERIN+Beta-Roll+CADHERIN+Beta-Roll+Beta-Roll+BetaPropeller+Beta-Roll*→ | Beta-Roll+Beta-Roll+Beta-Roll+Beta-Roll+BetaPropeller+Beta-Roll+CADHERIN+Beta-Roll+CADHERIN+Beta-Roll+Beta-Roll+BetaPropeller+Beta-Roll | 4942 | D9A03_RS19645 | Alphaproteobacteria | Kiloniella sp. EL199            | hypothetical protein [Kiloniella sp. EL199].                                        | GCF_900313065.1 |
| WP_121219693.1 | SPRY+CARDB*→                                                                                                                                                 | SPRY+CARDB                                                                                                                              | 601  | BCL74_RS10110 | Alphaproteobacteria | Oceanibaculum indicum           | hypothetical protein [Oceanibaculum indicum].                                       | GCF_003633955.1 |
| WP_122906669.1 | SUN→ SPRY+SUN*→ Laminin_G_3→ Disaggr_repeat→?→?→ Phage_holin→                                                                                                | SPRY+SUN                                                                                                                                | 424  | EDM57_RS21100 | Firmicutes          | Brevibacillus gelatini          | discoidin domain-containing protein [Brevibacillus gelatini].                       | GCF_003710935.1 |
| WP_123769372.1 | Phage-tail-tape→?→?→?→?→ SPRY+X*→?→ DAM→?→  <?  ?→  <-Redoxin                                                                                                | SPRY+X                                                                                                                                  | 660  | EDC50_RS05235 | Gammaproteobacteria | Vulcaniibacterium tengchongense | hypothetical protein [Vulcaniibacterium tengchongense].                             | GCF_003814555.1 |
| WP_123796746.1 | HTH_20→  <-Trypsin<-ABhydrolase  ACET→  <-DUF2935<-?  SIG+SPRY*→                                                                                             | SIG+SPRY                                                                                                                                | 332  | EG487_RS02750 | Firmicutes          | Paenibacillus polymyxa          | hypothetical protein [Paenibacillus polymyxa].                                      | GCF_003813765.1 |
| WP_123958466.1 | Phage_connect_1→ Phage_H_T_join→ HK97-gp10_like→ DUF3168→ Phage_TTP_11→ Phage_TAC_13→?→ SPRY+X*→?→ Phage-tail-tape→ ConA-repeats→                            | SPRY+X                                                                                                                                  | 657  | EGY09_RS07240 | Gammaproteobacteria | Stenotrophomonas maltophilia    | hypothetical protein [Stenotrophomonas maltophilia].                                | GCF_003812985.1 |
| WP_124116383.1 | SUN→ SPRY+SUN→ <i>SPRY</i> → Disaggr_repeat→ Phage_holin_4_1→                                                                                                | SPRY+SUN                                                                                                                                | 707  | EDO6_RS18680  | Firmicutes          | Paenibacillus xylanexedens      | hypothetical protein [Paenibacillus xylanexedens].                                  | GCF_003833245.1 |
| WP_124116384.1 | -                                                                                                                                                            | -                                                                                                                                       | 413  | EDO6_RS18685  | Firmicutes          | Paenibacillus xylanexedens      | discoidin domain-containing protein [Paenibacillus xylanexedens].                   | GCF_003833245.1 |
| WP_124650057.1 | Arm-DNA-bind_3+SPRY*→                                                                                                                                        | Arm-DNA-bind_3+SPRY                                                                                                                     | 469  | DIE19_RS04180 | Betaproteobacteria  | Burkholderia sp. Bp9126         | integrase arm-type DNA-binding domain-containing protein [Burkholderia sp. Bp9126]. | GCF_003853715.1 |
| WP_125335565.1 | SPRY*→?→ Phage_lysozyme→                                                                                                                                     | SPRY                                                                                                                                    | 816  | EGJ58_RS22040 | Alphaproteobacteria | Ochrobactrum anthropi           | hypothetical protein [Ochrobactrum anthropi].                                       | GCF_003937425.1 |
| WP_129381357.1 | SUN→ SPRY+SUN→ <i>SPRY+SUN</i> → Laminin_G_3→ Disaggr_repeat→ Phage_holin_4_1→                                                                               | SPRY+SUN                                                                                                                                | 423  | EBB07_RS29185 | Firmicutes          | Paenibacillaceae bacterium      | hypothetical protein [Paenibacillaceae bacterium].                                  | GCF_004134985.1 |
| WP_129381358.1 | -                                                                                                                                                            | -                                                                                                                                       | 415  | EBB07_RS29190 | Firmicutes          | Paenibacillaceae bacterium      | hypothetical protein [Paenibacillaceae bacterium].                                  | GCF_004134985.1 |
| WP_130767937.1 | Phage_connect_1→ Phage_H_T_join→ HK97-gp10_like→ DUF3168→ Phage_TTP_11→ Phage_TAC_13→?→ SPRY+X*→?→ Phage-tail-tape→ ConA-repeats→ ConA→?→ PSE→  <?  SRAP→    | SPRY+X                                                                                                                                  | 655  | STNY_RS04735  | Gammaproteobacteria | Stenotrophomonas sp. Y          | hypothetical protein [Stenotrophomonas sp. Y].                                      | GCF_004306035.1 |
| WP_134709562.1 | Phage_connect_1→ Phage_H_T_join→ HK97-gp10_like→ DUF3168→ Phage_TTP_11→ Phage_TAC_13→?→ SPRY+X*→?→?→ Phage-tail-tape→ ConA-repeats→ ConA→                    | SPRY+X                                                                                                                                  | 655  | EUA01_RS04295 | Gammaproteobacteria | Stenotrophomonas maltophilia    | hypothetical protein [Stenotrophomonas maltophilia].                                | GCF_004522395.1 |

| acc            | operon                                                                                                                                          | architecture                                  | len  | gen.name             | taxend              | species                                      | define                                                               | gca             |
|----------------|-------------------------------------------------------------------------------------------------------------------------------------------------|-----------------------------------------------|------|----------------------|---------------------|----------------------------------------------|----------------------------------------------------------------------|-----------------|
| WP_134729602.1 | Phage_connect_1→ Phage_H_T_join→ HK97-gp10_like→ DUF3168→ Phage_TTP_11→ Phage_TAC_13→?→ SPRY+X*→?→?→ Phage-tail-tape→ ConA-repeats→?→?→  <-SRAP | SPRY+X                                        | 657  | EUA00_RS03030        | Gammaproteobacteria | Stenotrophomonas maltophilia                 | hypothetical protein [Stenotrophomonas maltophilia].                 | GCF_004522355.1 |
| WP_136006293.1 | Phage_connect_1→ Phage_H_T_join→ HK97-gp10_like→ DUF3168→ Phage_TTP_11→ Phage_TAC_13→?→ SPRY+X*→?→ Phage-tail-tape→                             | SPRY+X                                        | 656  | E5352_RS15345        | Gammaproteobacteria | Stenotrophomonas maltophilia                 | hypothetical protein [Stenotrophomonas maltophilia].                 | GCF_004794075.1 |
| WP_136702221.1 | SPRY*→ Phage_tail_APC→                                                                                                                          | SPRY                                          | 539  | E6C67_RS08475        | Alphaproteobacteria | Azospirillum sp. TSA2s                       | hypothetical protein [Azospirillum sp. TSA2s].                       | GCF_004923315.1 |
| WP_136702953.1 | SPRY*→?→?→ Cluster153_2clades→                                                                                                                  | SPRY                                          | 708  | E6C67_RS14155        | Alphaproteobacteria | Azospirillum sp. TSA2s                       | hypothetical protein [Azospirillum sp. TSA2s].                       | GCF_004923315.1 |
| WP_137222083.1 | Redoxin→  <-tRNA<-?  ?→  <-tRNA<-tRNA<-tRNA  ?→?→ SIG+SPRY+Cohesin*→                                                                            | SIG+SPRY+Cohesin                              | 509  | PaeCFBP13512_RS05670 | Firmicutes          | Paenibacillus sp. CFBP13512                  | hypothetical protein [Paenibacillus sp. CFBP13512].                  | GCF_005233705.1 |
| WP_140785213.1 | SPRY+Laminin_G_3*→                                                                                                                              | SPRY+Laminin_G_3                              | 473  | FJ417_RS24630        | Alphaproteobacteria | Mesorhizobium sp. B3-1-7                     | hypothetical protein [Mesorhizobium sp. B3-1-7].                     | GCF_006439385.1 |
| WP_140977547.1 | SPRY+Clostridium_P47+TM+TM+TM*→                                                                                                                 | SPRY+Clostridium_P47+TM+TM+TM                 | 750  | C2U70_RS08460        | Alphaproteobacteria | Bradyrhizobium guangdongense                 | TULIP family P47-like protein [Bradyrhizobium guangdongense].        | GCF_006483445.1 |
| WP_144787026.1 | SUN→ SUN→ SUN→ SUN→ SUN→ SPRY+SUN*→ SUN→ Laminin_G_3→ Disaggr_repeat→?→?→ Phage_holin_1→                                                        | SPRY+SUN                                      | 427  | FS727_RS01315        | Firmicutes          | Lysinibacillus fusiformis                    | discoidin domain-containing protein [Lysinibacillus fusiformis].     | GCF_007678325.1 |
| WP_145413289.1 | SUN→ SUN→ SPRY+SUN*→ Laminin_G_3→ Disaggr_repeat→ Phage_holin_4_1→                                                                              | SPRY+SUN                                      | 411  | FS823_RS10960        | Firmicutes          | Paenibacillus xylanexedens                   | discoidin domain-containing protein [Paenibacillus xylanexedens].    | GCF_007679855.1 |
| WP_145958251.1 | Phage-tail-tape→ PSE→?→?→?→ SPRY+X*→?→ DAM→                                                                                                     | SPRY+X                                        | 658  | C0575_RS17020        | Gammaproteobacteria | Xanthomonas                                  | MULTISPECIES: hypothetical protein [Xanthomonas].                    | GCF_002759275.1 |
| WP_147429703.1 | <-REC+OmpR-HTH<-?<-?<-?<-?  RHS_repeat+RHS_repeat+RHS_repeat+IG+SPRY+SPRY*→                                                                     | RHS_repeat+RHS_repeat+RHS_repeat+IG+SPRY+SPRY | 1116 | K256_RS17555         | Gammaproteobacteria | Alteromonadaceae bacterium 2052S.S.stab0a.01 | hypothetical protein [Alteromonadaceae bacterium 2052S.S.stab0a.01]. | GCF_003634075.1 |
| WP_149425237.1 | TM+TM→ Laminin_G_3+SPRY*→ Cluster358_2clades→?→?→ Phage_holin→?→?→  <-SRAP                                                                      | Laminin_G_3+SPRY                              | 714  | OTERR_RS06755        | Betaproteobacteria  | Oryzomicrobium terrae                        | hypothetical protein [Oryzomicrobium terrae].                        | GCF_008274805.1 |
| WP_151150764.1 | Phage_T7_tail→ SPRY*→ Phage_tail_APC→                                                                                                           | SPRY                                          | 494  | F8A88_RS08730        | Deltaproteobacteria | Desulfovibrio senegalensis                   | hypothetical protein [Desulfovibrio senegalensis].                   | GCF_008830225.1 |
| WP_152380319.1 | HTH_20→  <-ABhydrolase<-?  SIG+SPRY*→                                                                                                           | SIG+SPRY                                      | 377  | GCU48_RS13350        | Firmicutes          | Paenibacillus brasiliensis                   | hypothetical protein [Paenibacillus brasiliensis].                   | GCF_009363115.1 |
| WP_152906267.1 | Phage-tail-tape→ ConA-repeats→?→ SPRY+X*→?→ PSE→  <-?  REC+OmpR-HTH→                                                                            | SPRY+X                                        | 633  | ADI69_RS15035        | Gammaproteobacteria | Stenotrophomonas maltophilia                 | hypothetical protein [Stenotrophomonas maltophilia].                 | GCF_001073045.1 |
| WP_153164331.1 | Phage_connect_1→ Phage_H_T_join→ HK97-gp10_like→ DUF3168→ Phage_TTP_11→ Phage_TAC_13→?→ SPRY+X*→?→ Phage-tail-tape→?→?→?→  <-SRAP               | SPRY+X                                        | 656  | GDJ08_RS03810        | Gammaproteobacteria | Stenotrophomonas sp. CPCC 101271             | hypothetical protein [Stenotrophomonas sp. CPCC 101271].             | GCF_009467805.1 |

| acc            | operon                                                                                                                              | architecture | len | gen.name       | taxend              | species                           | define                                                                   | gca             |
|----------------|-------------------------------------------------------------------------------------------------------------------------------------|--------------|-----|----------------|---------------------|-----------------------------------|--------------------------------------------------------------------------|-----------------|
| WP_153794576.1 | SIG+SPRY*→                                                                                                                          | SIG+SPRY     | 333 | BJH92_RS10685  | Firmicutes          | Paenibacillus polymyxa            | hypothetical protein [Paenibacillus polymyxa].                           | GCF_009650715.1 |
| WP_154081143.1 | Phage_connect_1→ Phage_H_T_join→ HK97-gp10_like→ DUF3168→ Phage_TTP_11→ Phage_TAC_13→?→ SPRY+X*→?→?→ Phage-tail-tape→               | SPRY+X       | 655 | B861_RS0208195 | Gammaproteobacteria | Stenotrophomonas maltophilia      | hypothetical protein [Stenotrophomonas maltophilia].                     | GCF_000295735.1 |
| WP_154263126.1 | Phage-tail-tape→ ConA-repeats→?→ SPRY+X*→                                                                                           | SPRY+X       | 655 | FEO89_RS08390  | Gammaproteobacteria | Stenotrophomonas maltophilia      | hypothetical protein [Stenotrophomonas maltophilia].                     | GCF_009676565.1 |
| WP_154352257.1 | Phage_connect_1→ Phage_H_T_join→ HK97-gp10_like→ DUF3168→ Phage_TTP_11→ Phage_TAC_13→?→ SPRY+X*→?→?→ Phage-tail-tape→ ConA-repeats→ | SPRY+X       | 657 | FEO88_RS08425  | Gammaproteobacteria | Stenotrophomonas maltophilia      | hypothetical protein [Stenotrophomonas maltophilia].                     | GCF_009676585.1 |
| WP_154965920.1 | SIG+SPRY*→?→  <-?<-PSE<-PSE<-?<-?<-?<-Phage_holin                                                                                   | SIG+SPRY     | 346 | F1386_RS02215  | Firmicutes          | Paenibacillus azotifigens         | hypothetical protein [Paenibacillus azotifigens].                        | GCF_008635805.1 |
| WP_156830543.1 | Cluster180_2clades→?→?→?→?→?→?→ SPRY*→                                                                                              | SPRY         | 830 | METMA_RS27135  | Gammaproteobacteria | Methylobacter marinus             | hypothetical protein [Methylobacter marinus].                            | GCF_000383855.1 |
| WP_157628481.1 | Phage_connect_1→ Phage_H_T_join→ HK97-gp10_like→ DUF3168→ Phage_TTP_11→ Phage_TAC_13→?→ SPRY+X*→?→ Phage-tail-tape→                 | SPRY+X       | 657 | SMAL_RS12680   | Gammaproteobacteria | Stenotrophomonas maltophilia      | hypothetical protein [Stenotrophomonas maltophilia].                     | GCF_000020665.1 |
| WP_157793929.1 | SUN→ SPRY+SUN*→ SUN→ Laminin_G_3→ Disaggr_repeat→ Phage_holin_4_1→                                                                  | SPRY+SUN     | 409 | B9T62_RS19340  | Firmicutes          | Paenibacillus donghaensis         | discoidin domain-containing protein [Paenibacillus donghaensis].         | GCF_002192415.1 |
| WP_158702666.1 | SUN→ SPRY+SUN*→                                                                                                                     | SPRY+SUN     | 405 | C8268_RS03870  | Firmicutes          | Paenibacillus sp. Marseille-P3787 | discoidin domain-containing protein [Paenibacillus sp. Marseille-P3787]. | GCF_900289175.1 |
| WP_159054946.1 | OBfold→?→?→  <-?  ?→ ConA-repeats→?→ SPRY+X*→                                                                                       | SPRY+X       | 655 | C9J74_RS07540  | Gammaproteobacteria | Stenotrophomonas maltophilia      | hypothetical protein [Stenotrophomonas maltophilia].                     | GCF_003030985.1 |
| WP_160788604.1 | HTH_20→  <-PSE<-ABhydrolase<-Polbetant  ACET→ Cupin_2→ ABhydrolase→  <-DUF2935  SIG+SPRY*→?→ PSE→  <-Glycos_transf_2                | SIG+SPRY     | 338 | GRP75_RS03415  | Firmicutes          | Paenibacillus sp. OT2-17          | hypothetical protein [Paenibacillus sp. OT2-17].                         | GCF_009827695.1 |
| WP_161771818.1 | Phage_TAC_13→?→ SPRY+X*→?→?→ Phage-tail-tape→                                                                                       | SPRY+X       | 657 | AR275_RS25795  | Gammaproteobacteria | Stenotrophomonas maltophilia      | hypothetical protein [Stenotrophomonas maltophilia].                     | GCF_001506105.1 |
| WP_162174107.1 | Cluster165_3clades→?→?→ Cluster303_2clades→?→?→ TM+TM→ SPRY*→?→?→?→?→?→?→ SIG+HORMA→                                                | SPRY         | 125 | HMCN_RS19520   | Betaproteobacteria  | Hermiimonas sp. CN                | hypothetical protein [Hermiimonas sp. CN].                               | GCF_000622895.1 |
| WP_162407361.1 | Phage-tail-tape→?→?→ SUN→ SPRY+X*→?→  <-?  DAM→                                                                                     | SPRY+X       | 654 | CSC62_RS14285  | Gammaproteobacteria | Pseudoxanthomonas jiangsuensis    | hypothetical protein [Pseudoxanthomonas jiangsuensis].                   | GCF_010093185.1 |
| WP_162815241.1 | SPRY*→                                                                                                                              | SPRY         | 219 | DOU47_RS11710  | Actinobacteria      | Microbacterium arborescens        | hypothetical protein [Microbacterium arborescens].                       | GCF_003339645.1 |
| WP_163369807.1 | SPRY*→                                                                                                                              | SPRY         | 262 | G7B23_RS04230  | Gammaproteobacteria | Endozoicomonas acroporae          | hypothetical protein [Endozoicomonas acroporae].                         | GCF_010994325.1 |

| acc            | operon                                                                                                                                                 | architecture          | len | gen.name      | taxend              | species                       | define                                                           | gca             |
|----------------|--------------------------------------------------------------------------------------------------------------------------------------------------------|-----------------------|-----|---------------|---------------------|-------------------------------|------------------------------------------------------------------|-----------------|
| WP_163387923.1 | SPRY*→                                                                                                                                                 | SPRY                  | 262 | EO230_RS13880 | Gammaproteobacteria | Endozoicomonas acroporae      | hypothetical protein [Endozoicomonas acroporae].                 | GCF_010994335.1 |
| WP_163679668.1 | Laminin_G_3+SPRY+SPRY*→                                                                                                                                | Laminin_G_3+SPRY+SPRY | 704 | G4223_RS11800 | Alphaproteobacteria | Magnetospirillum aberrantis   | hypothetical protein [Magnetospirillum aberrantis].              | GCF_011022235.1 |
| WP_164136018.1 | Phage_H_T_join→ HK97-gp10_like→ DUF3168→?→ Phage_TTP_11→ Phage_TAC_13→?→ SPRY+X*→?→?→ Phage-tail-tape→ ConA-repeats→ ConA→                             | SPRY+X                | 657 | G4995_RS01655 | Gammaproteobacteria | Stenotrophomonas maltophilia  | hypothetical protein [Stenotrophomonas maltophilia].             | GCF_010604725.1 |
| WP_164170835.1 | Phage_connect_1→ Phage_H_T_join→ HK97-gp10_like→ DUF3168→ Phage_TTP_11→ Phage_TAC_13→?→ SPRY+X*→?→ Phage-tail-tape→ ConA-repeats→                      | SPRY+X                | 657 | G5A21_RS04165 | Gammaproteobacteria | Stenotrophomonas maltophilia  | hypothetical protein [Stenotrophomonas maltophilia].             | GCF_010605085.1 |
| WP_164171533.1 | Phage_connect_1→ Phage_H_T_join→ HK97-gp10_like→ DUF3168→ Phage_TTP_11→ Phage_TAC_13→?→ SPRY+X*→?→?→ Phage-tail-tape→ ConA-repeats→?→?→ SRAP→          | SPRY+X                | 657 | G5A20_RS11530 | Gammaproteobacteria | Stenotrophomonas maltophilia  | hypothetical protein [Stenotrophomonas maltophilia].             | GCF_010607635.1 |
| WP_164186354.1 | Phage_connect_1→ Phage_H_T_join→ HK97-gp10_like→ DUF3168→ Phage_TTP_11→ Phage_TAC_13→?→ SPRY+X*→?→?→ Phage-tail-tape→ ConA-repeats→?→?→ SRAP→          | SPRY+X                | 657 | G4996_RS10295 | Gammaproteobacteria | Stenotrophomonas maltophilia  | hypothetical protein [Stenotrophomonas maltophilia].             | GCF_010608865.1 |
| WP_164222458.1 | Phage_connect_1→ Phage_H_T_join→ HK97-gp10_like→ DUF3168→ Phage_TTP_11→ Phage_TAC_13→?→ SPRY+X*→  <-?  ?→?→ Phage-tail-tape→ ConA-repeats→             | SPRY+X                | 658 | G5A44_RS14400 | Gammaproteobacteria | Stenotrophomonas maltophilia  | hypothetical protein [Stenotrophomonas maltophilia].             | GCF_010608905.1 |
| WP_164227274.1 | Phage_connect_1→ Phage_H_T_join→ HK97-gp10_like→ DUF3168→ Phage_TTP_11→ Phage_TAC_13→?→ SPRY+X*→?→ Phage-tail-tape→ ConA-repeats→?→?→  <-PSE  ?→ SRAP→ | SPRY+X                | 658 | G5A23_RS09720 | Gammaproteobacteria | Stenotrophomonas maltophilia  | hypothetical protein [Stenotrophomonas maltophilia].             | GCF_010605135.1 |
| WP_164262535.1 | Phage_connect_1→ Phage_H_T_join→ HK97-gp10_like→ DUF3168→ Phage_TTP_11→ Phage_TAC_13→?→ SPRY+X*→?→?→ Phage-tail-tape→ ConA-repeats→?→  <-SRAP          | SPRY+X                | 655 | G5A42_RS09935 | Gammaproteobacteria | Stenotrophomonas maltophilia  | hypothetical protein [Stenotrophomonas maltophilia].             | GCF_010609005.1 |
| WP_164272506.1 | Phage_connect_1→ Phage_H_T_join→ HK97-gp10_like→ DUF3168→ Phage_TTP_11→ Phage_TAC_13→?→ SPRY+X*→?→?→ Phage-tail-tape→ ConA-repeats→ ConA→?→  <-SRAP    | SPRY+X                | 657 | G4G00_RS08180 | Gammaproteobacteria | Stenotrophomonas sp. B1-1     | hypothetical protein [Stenotrophomonas sp. B1-1].                | GCF_010894375.1 |
| WP_164283369.1 | Phage_connect_1→ Phage_H_T_join→ HK97-gp10_like→ DUF3168→ Phage_TTP_11→ Phage_TAC_13→?→ SPRY+X*→?→ Phage-tail-tape→ ConA-repeats→ ConA→?→  <-SRAP      | SPRY+X                | 655 | GJV38_RS08100 | Gammaproteobacteria | Stenotrophomonas maltophilia  | hypothetical protein [Stenotrophomonas maltophilia].             | GCF_010994225.1 |
| WP_164687941.1 | Phage_connect_1→ Phage_H_T_join→ HK97-gp10_like→ DUF3168→ Phage_TTP_11→ Phage_TAC_13→?→ SPRY+X*→?→?→ Phage-tail-tape→ ConA-repeats→ ConA→?→  <-SRAP    | SPRY+X                | 655 | G5C63_RS04670 | Gammaproteobacteria | Stenotrophomonas pavanii      | hypothetical protein [Stenotrophomonas pavanii].                 | GCF_011043715.1 |
| WP_164776353.1 | SUN→ SPRY+SUN*→ SUN→ Laminin_G_3→ Disaggr_repeat→ Phage_holin_4_1→?→ SIG+ConA+beta-propeller→                                                          | SPRY+SUN              | 423 | FLT43_RS09110 | Firmicutes          | Paenibacillus thiaminolyticus | hypothetical protein [Paenibacillus thiaminolyticus].            | GCF_004001005.1 |
| WP_164965245.1 | HTH_20→  <-Trypsin<-ABhydrolase  ACET→  <-DUF2935<-?  SIG+SPRY*→                                                                                       | SIG+SPRY              | 369 | G9G57_RS16175 | Firmicutes          | Paenibacillus sp. EKM211P     | hypothetical protein [Paenibacillus sp. EKM211P].                | GCF_011066175.1 |
| WP_165083476.1 | HTH_20→  <-Trypsin<-ABhydrolase  ACET→  <-DUF2935<-?  SIG+SPRY*→                                                                                       | SIG+SPRY              | 312 | G9G64_RS19615 | Firmicutes          | unclassified Paenibacillus    | MULTISPECIES: hypothetical protein [unclassified Paenibacillus]. | GCF_011066085.1 |
| WP_165148029.1 | HTH_20→  <-ABhydrolase<-Polbetant  ACET→ Cupin_2→ ABhydrolase→  <-DUF2935  SIG+SPRY*→?→  <-Glycos_transf_2                                             | SIG+SPRY              | 345 | G9G52_RS14675 | Firmicutes          | unclassified Paenibacillus    | MULTISPECIES: hypothetical protein [unclassified Paenibacillus]. | GCF_011066155.1 |

| acc            | operon                                                                                                                                          | architecture     | len | gen.name      | taxend              | species                      | define                                                           | gca             |
|----------------|-------------------------------------------------------------------------------------------------------------------------------------------------|------------------|-----|---------------|---------------------|------------------------------|------------------------------------------------------------------|-----------------|
| WP_165178844.1 | HTH_20→  <-ABhydrolase<-Polbetant  ACET→ Cupin_2→  <-DUF2935  SIG+SPRY*→                                                                        | SIG+SPRY         | 330 | G9G54_RS16165 | Firmicutes          | Paenibacillus sp. EKM212P    | hypothetical protein [Paenibacillus sp. EKM212P].                | GCF_011066115.1 |
| WP_165980135.1 | SUN→ SUN→ SPRY+SUN*→ Laminin_G_3→ Disaggr_repeat→                                                                                               | SPRY+SUN         | 412 | E2R58_RS01745 | Firmicutes          | Paenibacillus amylolyticus   | hypothetical protein [Paenibacillus amylolyticus].               | GCF_004358835.1 |
| WP_167440979.1 | HTH_20→  <-Trypsin<-ABhydrolase  ACET→  <-DUF2935<-?  SIG+SPRY*→                                                                                | SIG+SPRY         | 332 | HFD99_RS19285 | Firmicutes          | Paenibacillus sp. EKM301P    | hypothetical protein [Paenibacillus sp. EKM301P].                | GCF_011800295.1 |
| WP_168180444.1 | SPRY+SUN*→ SUN→ SUN→ Laminin_G_3→ Disaggr_repeat→ Phage_holin_4_1→                                                                              | SPRY+SUN         | 417 | HRG14_RS16580 | Firmicutes          | Paenibacillus dendritiformis | hypothetical protein [Paenibacillus dendritiformis].             | GCF_012272915.1 |
| WP_168224778.1 | Phage-tail_3+FN3→ Cluster93_5clades→ Laminin_G_3+SPRY*→?→?→  <-?<-REC+OmpR-HTH                                                                  | Laminin_G_3+SPRY | 442 | EXZ61_RS14580 | Betaproteobacteria  | Rhodoferrax sediminis        | hypothetical protein [Rhodoferrax sediminis].                    | GCF_006974105.1 |
| WP_168759630.1 | Phage_H_T_join→ HK97-gp10_like→ DUF3168→?→ Phage_TTP_11→ Phage_TAC_13→?→ SPRY+X*→?→ Phage-tail-tape→ ConA-repeats→?→?→  <-PSE  ?→ SRAP→         | SPRY+X           | 655 | HGN30_RS14120 | Gammaproteobacteria | Stenotrophomonas maltophilia | hypothetical protein [Stenotrophomonas maltophilia].             | GCF_012647025.1 |
| WP_170142066.1 | Phage-tail_3→?→ SPRY*→?→?→?→?→?→ DAM→                                                                                                           | SPRY             | 223 | DFQ59_RS06730 | Gammaproteobacteria | Thioalbus denitrificans      | hypothetical protein [Thioalbus denitrificans].                  | GCF_003337735.1 |
| WP_171365214.1 | SUN→ SUN→?→ DISCOIDIN→ SUN→ SPRY+SUN*→ SUN→ Laminin_G_3→ Disaggr_repeat→?→?→ Phage_holin_1→                                                     | SPRY+SUN         | 425 | HL291_RS06145 | Firmicutes          | Lysinibacillus fusiformis    | discoidin domain-containing protein [Lysinibacillus fusiformis]. | GCF_013112215.1 |
| WP_180361703.1 | SUN→ SUN→ SUN→ SPRY+SUN*→ Laminin_G_3→ Disaggr_repeat→                                                                                          | SPRY+SUN         | 412 | CXK86_RS01005 | Firmicutes          | Paenibacillus sp. BGI2013    | hypothetical protein [Paenibacillus sp. BGI2013].                | GCF_002843485.1 |
| WP_180832871.1 | Phage_connect_1→ Phage_H_T_join→ HK97-gp10_like→ DUF3168→ Phage_TTP_11→ Phage_TAC_13→?→ SPRY+X*→?→?→ Phage-tail-tape→ ConA-repeats→?→?→  <-SRAP | SPRY+X           | 657 | D7U76_RS15765 | Gammaproteobacteria | Stenotrophomonas maltophilia | hypothetical protein [Stenotrophomonas maltophilia].             | GCF_013463655.1 |
| WP_180835450.1 | Phage_connect_1→ Phage_H_T_join→ HK97-gp10_like→ DUF3168→ Phage_TTP_11→ Phage_TAC_13→?→ SPRY+X*→?→?→ Phage-tail-tape→?→?→?→  <-PSE  ?→  <-SRAP  | SPRY+X           | 657 | D7U87_RS15230 | Gammaproteobacteria | Stenotrophomonas maltophilia | hypothetical protein [Stenotrophomonas maltophilia].             | GCF_013463795.1 |
| WP_180837803.1 | Phage-tail-tape→ ConA-repeats→?→ SPRY+X*→?→?→?→?→?→?→  <-Ribonuc_L-PSP                                                                          | SPRY+X           | 633 | D7Y22_RS10130 | Gammaproteobacteria | Stenotrophomonas maltophilia | hypothetical protein [Stenotrophomonas maltophilia].             | GCF_013463895.1 |
| WP_180844236.1 | Phage-tail-tape→ ConA-repeats→?→ SPRY+X*→?→?→?→?→ SIG+TM+TM+TM+TM+TM+TM+TM+TM→ ABC-ATPase→                                                      | SPRY+X           | 655 | D7Y24_RS02400 | Gammaproteobacteria | Stenotrophomonas maltophilia | hypothetical protein [Stenotrophomonas maltophilia].             | GCF_013463875.1 |
| WP_180874375.1 | Phage_connect_1→ Phage_H_T_join→ HK97-gp10_like→ DUF3168→ Phage_TTP_11→ Phage_TAC_13→?→ SPRY+X*→?→?→ Phage-tail-tape→ ConA-repeats→?→?→  <-SRAP | SPRY+X           | 657 | D7Y39_RS15850 | Gammaproteobacteria | Stenotrophomonas maltophilia | hypothetical protein [Stenotrophomonas maltophilia].             | GCF_013464195.1 |
| WP_180877176.1 | Phage_connect_1→ Phage_H_T_join→ HK97-gp10_like→ DUF3168→ Phage_TTP_11→ Phage_TAC_13→?→ SPRY+X*→?→?→ Phage-tail-tape→ ConA-repeats→?→?→  <-SRAP | SPRY+X           | 657 | D7U95_RS06530 | Gammaproteobacteria | Stenotrophomonas maltophilia | hypothetical protein [Stenotrophomonas maltophilia].             | GCF_013463605.1 |
| WP_180890353.1 | Phage_connect_1→ Phage_H_T_join→ HK97-gp10_like→ DUF3168→ Phage_TTP_11→ Phage_TAC_13→?→ SPRY+X*→?→?→ Phage-tail-tape→ ConA-repeats→?→?→  <-SRAP | SPRY+X           | 658 | D7Y45_RS11625 | Gammaproteobacteria | Stenotrophomonas maltophilia | hypothetical protein [Stenotrophomonas maltophilia].             | GCF_013464305.1 |
| WP_182068260.1 | Phage_connect_1→ Phage_H_T_join→ HK97-gp10_like→ DUF3168→ Phage_TTP_11→ Phage_TAC_13→?→ SPRY+X*→?→?→ Phage-tail-tape→ ConA-repeats→ ConA→       | SPRY+X           | 655 | H7A80_RS13755 | Gammaproteobacteria | Stenotrophomonas pavanii     | hypothetical protein [Stenotrophomonas pavanii].                 | GCF_903970895.1 |

| acc            | operon                                                                                                                                             | architecture | len | gen.name      | taxend              | species                        | define                                                 | gca             |
|----------------|----------------------------------------------------------------------------------------------------------------------------------------------------|--------------|-----|---------------|---------------------|--------------------------------|--------------------------------------------------------|-----------------|
| WP_182680994.1 | Phage_connect_1→ Phage_H_T_join→ HK97-gp10_like→ DUF3168→ Phage_TTP_11→ Phage_TAC_13→?→ SPRY+X*→?→?→<br>Phage-tail-tape→ ConA-repeats→?→?→  <-SRAP | SPRY+X       | 657 | H4O10_RS07755 | Gammaproteobacteria | Stenotrophomonas sp. I18B00994 | hypothetical protein [Stenotrophomonas sp. I18B00994]. | GCF_014145825.1 |
| WP_182852413.1 | Cluster242_2clades→?→ PSE→?→ SPRY*→                                                                                                                | SPRY         | 255 | H7K70_RS11535 | Gammaproteobacteria | Pseudomonas otitidis           | hypothetical protein [Pseudomonas otitidis].           | GCF_014161995.1 |
| WP_183080221.1 | Phage_connect_1→ Phage_H_T_join→ HK97-gp10_like→ DUF3168→ Phage_TTP_11→ Phage_TAC_13→?→ SPRY+X*→?→?→<br>Phage-tail-tape→ ConA-repeats→?→?→ SRAP→   | SPRY+X       | 657 | C7543_RS14050 | Gammaproteobacteria | Stenotrophomonas sp. CF319     | hypothetical protein [Stenotrophomonas sp. CF319].     | GCF_003633905.1 |

7. Source data. Gene neighborhoods and domain architectures of TPR-GREAB-C-PIN systems

| acc        | operon                                                               | architecture          | len  | gen.name       | taxend              | species                                        | define                                                                                | gca             |
|------------|----------------------------------------------------------------------|-----------------------|------|----------------|---------------------|------------------------------------------------|---------------------------------------------------------------------------------------|-----------------|
| -          | -                                                                    | -                     | NA   | NA             | NA                  | NA                                             | NA                                                                                    | GCF_016236915.1 |
| AAQ66293.1 | TPR+GreAB-C+PIN*→                                                    | TPR+GreAB-C+PIN       | 1140 | PG_1202        | Bacteroidetes       | Porphyromonas gingivalis W83                   | hypothetical protein PG_1202 [Porphyromonas gingivalis W83].                          | GCA_000007585.1 |
| ABA73572.1 | REase+TPR+GreAB-C+PIN*→                                              | REase+TPR+GreAB-C+PIN | 1113 | Pf01_1829      | Gammaproteobacteria | Pseudomonas fluorescens Pf0-1                  | hypothetical protein Pf01_1829 [Pseudomonas fluorescens Pf0-1].                       | GCA_000012445.1 |
| ABP70317.1 | TPR+GreAB-C+PIN*→                                                    | TPR+GreAB-C+PIN       | 1188 | Rsph17025_1421 | Alphaproteobacteria | Rhodobacter sphaeroides ATCC 17025             | hypothetical protein Rsph17025_1421 [Rhodobacter sphaeroides ATCC 17025].             | GCA_000016405.1 |
| ACB93983.1 | TPR+GreAB-C+PIN*→                                                    | TPR+GreAB-C+PIN       | 1100 | Bind_0329      | Alphaproteobacteria | Beijerinckia indica subsp. indica ATCC 9039    | Tetratricopeptide TPR_2 repeat protein [Beijerinckia indica subsp. indica ATCC 9039]. | GCA_000019845.1 |
| ACQ93407.1 | HetE-N1→ TPR+GreAB-C+PIN*→                                           | TPR+GreAB-C+PIN       | 1069 | Tola_1798      | Gammaproteobacteria | Tolomonas auensis DSM 9187                     | hypothetical protein Tola_1798 [Tolomonas auensis DSM 9187].                          | GCA_000023065.1 |
| ADX44119.1 | REase+TPR+GreAB-C+PIN*→                                              | REase+TPR+GreAB-C+PIN | 1383 | Acav_0193      | Betaproteobacteria  | Acidovorax avenae subsp. avenae ATCC 19860     | hypothetical protein Acav_0193 [Acidovorax avenae subsp. avenae ATCC 19860].          | GCA_000176855.2 |
| AFD27801.1 | TPR+GreAB-C+PIN*→                                                    | TPR+GreAB-C+PIN       | 1286 | DGo_PC0009     | Deinococci          | Deinococcus gobiensis I-0                      | hypothetical protein DGo_PC0009 (plasmid) [Deinococcus gobiensis I-0].                | GCA_000252445.1 |
| AFJ56694.1 | REase+TPR+GreAB-C+PIN*→                                              | REase+TPR+GreAB-C+PIN | 1321 | PfIA506_2672   | Gammaproteobacteria | Pseudomonas fluorescens A506                   | tetratricopeptide repeat protein [Pseudomonas fluorescens A506].                      | GCA_000262325.2 |
| AGO88322.1 | REase+TPR+GreAB-C+PIN*→?→?→ Calcineurin→ Calcineurin→?→ Calcineurin→ | REase+TPR+GreAB-C+PIN | 1344 | MOC_1p0084     | Alphaproteobacteria | Methylobacterium oryzae CBMB20                 | Tetratricopeptide TPR_2 repeat protein (plasmid) [Methylobacterium oryzae CBMB20].    | -               |
| AHC85672.1 | HetE-N1→ TPR+TPR+GreAB-C+PIN*→                                       | TPR+TPR+GreAB-C+PIN   | 1114 | X969_07375     | Gammaproteobacteria | Pseudomonas monteilii SB3078                   | hypothetical protein X969_07375 [Pseudomonas monteilii SB3078].                       | GCA_000510285.1 |
| AHG89833.1 | TPR+GreAB-C+PIN*→                                                    | TPR+GreAB-C+PIN       | 1325 | J421_2296      | Gemmatimonadetes    | Gemmatirosa kalamazoonesis                     | hypothetical protein J421_2296 [Gemmatirosa kalamazoonesis].                          | GCA_000522985.1 |
| AHZ68657.1 | REase+TPR+GreAB-C+PIN*→                                              | REase+TPR+GreAB-C+PIN | 1527 | OU5_1578       | Gammaproteobacteria | Pseudomonas mandelii JR-1                      | hypothetical protein OU5_1578 [Pseudomonas mandelii JR-1].                            | GCA_000257545.3 |
| AIO22452.1 | REase+TPR+GreAB-C+PIN*→                                              | REase+TPR+GreAB-C+PIN | 1474 | DM41_7691      | Betaproteobacteria  | Burkholderia cepacia ATCC 25416                | tetratricopeptide repeat family protein (plasmid) [Burkholderia cepacia ATCC 25416].  | GCA_003546465.1 |
| AJG23424.1 | REase+TPR+GreAB-C+PIN*→                                              | REase+TPR+GreAB-C+PIN | 1348 | RR42_s1836     | Betaproteobacteria  | Cupriavidus basilensis                         | hypothetical protein RR42_s1836 [Cupriavidus basilensis].                             | GCA_000832305.1 |
| AJG25013.1 | NACHT→ REase+TPR+GreAB-C+PIN*→                                       | REase+TPR+GreAB-C+PIN | 1361 | RR42_s3437     | Betaproteobacteria  | Cupriavidus basilensis                         | hypothetical protein RR42_s3437 [Cupriavidus basilensis].                             | GCA_000832305.1 |
| ALA80840.1 | TPR+GreAB-C+PIN*→                                                    | TPR+GreAB-C+PIN       | 706  | VN11_01310     | Gammaproteobacteria | Stenotrophomonas maltophilia                   | hypothetical protein VN11_01310 [Stenotrophomonas maltophilia].                       | GCA_001274595.1 |
| ALK23663.1 | REase+TPR+GreAB-C+PIN*→                                              | REase+TPR+GreAB-C+PIN | 1346 | APZ15_37705    | Betaproteobacteria  | Burkholderia cepacia ATCC 25416                | hypothetical protein APZ15_37705 (plasmid) [Burkholderia cepacia ATCC 25416].         | GCA_001411495.1 |
| ALY84300.1 | TPR+GreAB-C+PIN*→                                                    | TPR+GreAB-C+PIN       | 808  | HV95_15440     | Gammaproteobacteria | Pseudomonas aeruginosa                         | hypothetical protein HV95_15440 [Pseudomonas aeruginosa].                             | GCA_001516225.1 |
| AMM82949.1 | HetE-N1→ TPR+GreAB-C+PIN*→                                           | TPR+GreAB-C+PIN       | 1090 | AW43_10865     | Gammaproteobacteria | Pasteurella multocida subsp. multocida PMTB2.1 | hypothetical protein AW43_10865 [Pasteurella multocida subsp. multocida PMTB2.1].     | GCA_001578435.2 |
| ANP41882.1 | REase+TPR+GreAB-C+PIN*→                                              | REase+TPR+GreAB-C+PIN | 1247 | K529_013985    | Alphaproteobacteria | Epibacterium mobile F1926                      | hypothetical protein K529_013985 [Epibacterium mobile F1926].                         | GCA_000376545.2 |
| AOE80004.1 | TPR+GreAB-C+PIN*→                                                    | TPR+GreAB-C+PIN       | 962  | A7318_15795    | Gammaproteobacteria | Pseudomonas lurida                             | hypothetical protein A7318_15795 [Pseudomonas lurida].                                | GCA_001708485.1 |

| acc          | operon                                                               | architecture                    | len  | gen.name               | taxend                | species                                               | define                                                                                    | gca             |
|--------------|----------------------------------------------------------------------|---------------------------------|------|------------------------|-----------------------|-------------------------------------------------------|-------------------------------------------------------------------------------------------|-----------------|
| APP29939.1   | REase+TPR+GreAB-C+PIN*→   <-?  HTH→                                  | REase+TPR+GreAB-C+PIN           | 1216 | AUO97_03535            | Gammaproteobacteria   | Acinetobacter baumannii                               | hypothetical protein AUO97_03535 [Acinetobacter baumannii].                               | GCA_001593425.2 |
| APT35017.1   | REase+TPR+GreAB-C+PIN*→?→?→ Calcineurin→ Calcineurin→?→ Calcineurin→ | REase+TPR+GreAB-C+PIN           | 1340 | MCBMB27_05726          | Alphaproteobacteria   | Methylobacterium phyllosphaerae                       | hypothetical protein MCBMB27_05726 (plasmid) [Methylobacterium phyllosphaerae].           | GCA_001936175.1 |
| APV35618.1   | REase+TPR+GreAB-C+PIN*→                                              | REase+TPR+GreAB-C+PIN           | 1211 | BEN76_06135            | Gammaproteobacteria   | Acinetobacter soli                                    | hypothetical protein BEN76_06135 [Acinetobacter soli].                                    | GCA_001953195.1 |
| ARP63802.1   | REase+TPR+GreAB-C+PIN*→                                              | REase+TPR+GreAB-C+PIN           | 1328 | A9K65_010750           | Alphaproteobacteria   | Mesorhizobium sp. WSM1497                             | hypothetical protein A9K65_010750 [Mesorhizobium sp. WSM1497].                            | GCA_001672455.2 |
| ARS41908.1   | TPR+GreAB-C+PIN*→                                                    | TPR+GreAB-C+PIN                 | 1265 | CA265_20515            | Bacteroidetes         | Sphingobacteriaceae bacterium GW460-11-11-14-LB5      | hypothetical protein CA265_20515 [Sphingobacteriaceae bacterium GW460-11-11-14-LB5].      | GCA_002151545.1 |
| AWD09427.1   | HetE-N1→?→ TPR+GreAB-C+PIN*→                                         | TPR+GreAB-C+PIN                 | 512  | C7D56_14785            | Gammaproteobacteria   | Salmonella enterica subsp. enterica serovar Corvallis | hypothetical protein C7D56_14785 [Salmonella enterica subsp. enterica serovar Corvallis]. | GCA_003071545.1 |
| AXQ72363.1   | HetE-N1→ TPR+GreAB-C+PIN*→                                           | TPR+GreAB-C+PIN                 | 1090 | AWY89_05050            | Gammaproteobacteria   | Pasteurella multocida subsp. multocida                | hypothetical protein AWY89_05050 [Pasteurella multocida subsp. multocida].                | GCA_003428945.1 |
| AXW62973.1   | REase+TPR+GreAB-C+PIN*→                                              | REase+TPR+GreAB-C+PIN           | 1325 | CJO94_14695            | Betaproteobacteria    | Ralstonia solanacearum                                | hypothetical protein CJO94_14695 [Ralstonia solanacearum].                                | GCA_003515385.1 |
| AYG03885.1   | X+PIN*→                                                              | X+PIN                           | 1170 | D7I44_10295            | Actinobacteria        | Gryllotalpica protaetiae                              | hypothetical protein D7I44_10295 [Gryllotalpica protaetiae].                              | GCA_003627055.1 |
| BAE85210.1   | REase+TPR+GreAB-C+PIN*→                                              | REase+TPR+GreAB-C+PIN           | 1306 | DSY3421                | Firmicutes            | Desulfotobacterium hafniense Y51                      | hypothetical protein DSY3421 [Desulfotobacterium hafniense Y51].                          | GCA_000010045.1 |
| BBD03377.1   | REase+TPR→ TPR→ TPR+GreAB-C+PIN*→                                    | TPR+GreAB-C+PIN                 | 656  | YGS_C2P1391            | Alphaproteobacteria   | Sphingobium sp. YG1                                   | hypothetical protein YGS_C2P1391 [Sphingobium sp. YG1].                                   | GCA_003609795.1 |
| BBZ79150.1   | TPR+PIN*→                                                            | TPR+PIN                         | 1186 | MANY_44870             | Actinobacteria        | Mycolicibacterium anyangense                          | hypothetical protein MANY_44870 [Mycolicibacterium anyangense].                           | GCA_010731855.1 |
| BBZ91069.1   | PIN*→                                                                | PIN                             | 190  | F07S3_09020            | Alphaproteobacteria   | Bradyrhizobium diazoefficiens                         | hypothetical protein F07S3_09020 [Bradyrhizobium diazoefficiens].                         | GCA_014163475.1 |
| CAA9240899.1 | TPR+GreAB-C+PIN*→                                                    | TPR+GreAB-C+PIN                 | 1079 | AVDCRST_MAG77-1676     | environmental samples | uncultured Chloroflexi bacterium                      | MAG: hypothetical protein AVDCRST_MAG77-1676 [uncultured Chloroflexi bacterium].          | GCA_902805635.1 |
| CAB3809090.1 | PIN*→                                                                | PIN                             | 270  | LMG28138_06082         | Betaproteobacteria    | Pararobbsia alpina                                    | hypothetical protein LMG28138_06082 [Pararobbsia alpina].                                 | GCA_902859895.1 |
| CAC9458388.1 | TPR+GreAB-C+PIN*→?→   <-PSE  PSE→ PSE→?→ PSE→ PSE→ PSE→?→?→ TPR→     | TPR+GreAB-C+PIN                 | 1164 | SMARSOXL104_LO-CUS2140 | environmental samples | uncultured Gammaproteobacteria bacterium              | hypothetical protein [uncultured Gammaproteobacteria bacterium].                          | GCA_903813475.1 |
| CAC9474194.1 | TPR+GreAB-C+PIN*→                                                    | TPR+GreAB-C+PIN                 | 1164 | SMARSOXL102_LO-CUS3344 | environmental samples | uncultured Gammaproteobacteria bacterium              | hypothetical protein [uncultured Gammaproteobacteria bacterium].                          | GCA_903813445.1 |
| CAC9479061.1 | TPR+GreAB-C+PIN*→                                                    | TPR+GreAB-C+PIN                 | 677  | SMARSOXL51_LO-CUS3828  | environmental samples | uncultured Gammaproteobacteria bacterium              | hypothetical protein [uncultured Gammaproteobacteria bacterium].                          | GCA_903813485.1 |
| CAD79080.1   | TRD+TRD→?→?→ REase+SNF2→?→ TM+TM+TPR+GreAB-C+PIN*→                   | TM+TM+TPR+GreAB-C+PIN           | 1274 | RB11367                | Planctomycetes        | Rhodopirellula baltica SH 1                           | hypothetical protein RB11367 [Rhodopirellula baltica SH 1].                               | GCA_000196115.1 |
| CAE7733776.1 | IMS+HHH+GreAB+AraC-HTH+AraC-HTH*→                                    | IMS+HHH+GreAB+AraC-HTH+AraC-HTH | 771  | dinB                   | Alveolata             | Symbiodinium microadriaticum                          | dinB [Symbiodinium microadriaticum].                                                      | GCA_905231925.1 |
| CAG37728.1   | HetE-N1→ TPR+GreAB-C+PIN*→                                           | TPR+GreAB-C+PIN                 | 1114 | DP2999                 | Deltaproteobacteria   | Desulfotalea psychrophila LSv54                       | unknown protein [Desulfotalea psychrophila LSv54].                                        | GCA_000025945.1 |
| CCD86698.1   | REase+TPR+TPR+GreAB-C+PIN*→                                          | REase+TPR+TPR+GreAB-C+PIN       | 1326 | BRAO285_2000017        | Alphaproteobacteria   | Bradyrhizobium sp. ORS 285                            | conserved hypothetical protein [Bradyrhizobium sp. ORS 285].                              | GCA_000239755.2 |
| CDF45779.1   | X+PIN*→?→?→ CITB-HTH+LexA-protease→                                  | X+PIN                           | 1212 | BN450_02242            | environmental samples | Roseburia sp. CAG:100                                 | uncharacterized protein BN450_02242 [Roseburia sp. CAG:100].                              | GCA_000436955.1 |
| CDH20863.1   | HetE-N1→ TPR+GreAB-C+PIN*→ TPR+GreAB-C+PIN→                          | TPR+GreAB-C+PIN                 | 846  | XBKQ1_2810009          | Gammaproteobacteria   | Xenorhabdus bovienii str. kraussei Quebec             | conserved hypothetical protein [Xenorhabdus bovienii str. kraussei Quebec].               | GCA_000736555.1 |
| CEL29322.1   | REase+TPR+GreAB-C+PIN*→                                              | REase+TPR+GreAB-C+PIN           | 1486 | SRM1_02673             | Gammaproteobacteria   | Pseudomonas fluorescens                               | hypothetical protein SRM1_02673 [Pseudomonas fluorescens].                                | GCA_000827755.2 |

| acc          | operon                                   | architecture          | len  | gen.name        | taxend              | species                                               | define                                                                                             | gca             |
|--------------|------------------------------------------|-----------------------|------|-----------------|---------------------|-------------------------------------------------------|----------------------------------------------------------------------------------------------------|-----------------|
| CFK79862.1   | REase+TPR+GreAB-C+PIN*→                  | REase+TPR+GreAB-C+PIN | 1327 | ERS012324_00072 | Betaproteobacteria  | Burkholderia pseudomallei                             | Uncharacterised protein [Burkholderia pseudomallei].                                               | GCA_001327015.1 |
| CGG41859.1   | TPR+GreAB-C+PIN*→                        | TPR+GreAB-C+PIN       | 1147 | ERS020510_00033 | Firmicutes          | Streptococcus pneumoniae                              | putative PEP-CTERM system TPR-repeat lipoprotein [Streptococcus pneumoniae].                       | GCA_001339955.1 |
| CNG28227.1   | HetE-N1→ TPR+GreAB-C+PIN*→               | TPR+GreAB-C+PIN       | 1094 | ERS137937_00749 | Gammaproteobacteria | Yersinia enterocolitica                               | Uncharacterised protein [Yersinia enterocolitica].                                                 | GCA_001160345.1 |
| COE44409.1   | TPR+GreAB-C+PIN*→                        | TPR+GreAB-C+PIN       | 1147 | ERS020529_01064 | Firmicutes          | Streptococcus pneumoniae                              | putative PEP-CTERM system TPR-repeat lipoprotein [Streptococcus pneumoniae].                       | GCA_002889635.1 |
| CRI57148.1   | REase+TPR+GreAB-C+PIN*→                  | REase+TPR+GreAB-C+PIN | 1419 | CCOS191_2612    | Gammaproteobacteria | Pseudomonas sp. CCOS 191                              | hypothetical protein CCOS191_2612 [Pseudomonas sp. CCOS 191].                                      | GCA_001007005.1 |
| CTR52279.1   | HetE-N1→ TPR+GreAB-C+PIN*→               | TPR+GreAB-C+PIN       | 1093 | ERS085432_03851 | Gammaproteobacteria | Escherichia coli                                      | Uncharacterised protein [Escherichia coli].                                                        | GCA_001277455.1 |
| CTU76757.1   | HetE-N1→ TPR+GreAB-C+PIN*→               | TPR+GreAB-C+PIN       | 1093 | ERS085409_04356 | Gammaproteobacteria | Escherichia coli                                      | Uncharacterised protein [Escherichia coli].                                                        | GCA_001284445.1 |
| EAA6823230.1 | HetE-N1→ TPR+GreAB-C+PIN*→               | TPR+GreAB-C+PIN       | 839  | DRV62_14440     | Gammaproteobacteria | Salmonella enterica subsp. enterica serovar Corvallis | hypothetical protein DRV62_14440, partial [Salmonella enterica subsp. enterica serovar Corvallis]. | GCA_004191475.1 |
| EAA7528536.1 | HetE-N1→ TPR+GreAB-C+PIN*→               | TPR+GreAB-C+PIN       | 997  | WB97_04605      | Gammaproteobacteria | Salmonella enterica subsp. enterica                   | hypothetical protein WB97_04605, partial [Salmonella enterica subsp. enterica].                    | GCA_004218105.1 |
| EAB9718450.1 | HetE-N1→ TPR+GreAB-C+PIN*→               | TPR+GreAB-C+PIN       | 1094 | EBD60_05220     | Gammaproteobacteria | Escherichia coli                                      | hypothetical protein EBD60_05220 [Escherichia coli].                                               | GCA_004268345.1 |
| EAC0684623.1 | HetE-N1→ TPR+GreAB-C+PIN*→               | TPR+GreAB-C+PIN       | 1117 | ECA66_22430     | Gammaproteobacteria | Salmonella enterica subsp. enterica serovar Molade    | hypothetical protein ECA66_22430 [Salmonella enterica subsp. enterica serovar Molade].             | GCA_004273605.1 |
| EAM8584006.1 | HetE-N1→ TPR+GreAB-C+PIN*→?→   <-Trypsin | TPR+GreAB-C+PIN       | 1121 | BET14_04310     | Gammaproteobacteria | Salmonella enterica                                   | hypothetical protein BET14_04310 [Salmonella enterica].                                            | GCA_005437065.1 |
| EAM9325916.1 | HetE-N1→ TPR+GreAB-C+PIN*→               | TPR+GreAB-C+PIN       | 1106 | DPR23_14355     | Gammaproteobacteria | Salmonella enterica                                   | hypothetical protein DPR23_14355 [Salmonella enterica].                                            | GCA_005440115.1 |
| EAN1748525.1 | HetE-N1→ TPR+GreAB-C+PIN*→               | TPR+GreAB-C+PIN       | 1107 | D8T88_07580     | Gammaproteobacteria | Salmonella enterica                                   | hypothetical protein D8T88_07580 [Salmonella enterica].                                            | GCA_005450625.1 |
| EAO3021897.1 | HetE-N1→ TPR+GreAB-C+PIN*→               | TPR+GreAB-C+PIN       | 727  | E3A68_19440     | Gammaproteobacteria | Salmonella enterica                                   | hypothetical protein E3A68_19440, partial [Salmonella enterica].                                   | GCA_005498265.1 |
| EAO5192492.1 | HetE-N1→ TPR+GreAB-C+PIN*→               | TPR+GreAB-C+PIN       | 867  | E7928_13885     | Gammaproteobacteria | Salmonella enterica                                   | hypothetical protein E7928_13885, partial [Salmonella enterica].                                   | GCA_005509025.1 |
| EAO9608739.1 | HetE-N1→ TPR+GreAB-C+PIN*→               | TPR+GreAB-C+PIN       | 776  | BH019_23310     | Gammaproteobacteria | Salmonella enterica                                   | hypothetical protein BH019_23310, partial [Salmonella enterica].                                   | GCA_005533575.1 |
| EAR5961962.1 | HetE-N1→ TPR+GreAB-C+PIN*→               | TPR+GreAB-C+PIN       | 1101 | ES925_14455     | Gammaproteobacteria | Salmonella enterica                                   | hypothetical protein ES925_14455 [Salmonella enterica].                                            | GCA_005654255.1 |
| EAR6368406.1 | HetE-N1→ TPR+GreAB-C+PIN*→               | TPR+GreAB-C+PIN       | 1117 | EU234_19825     | Gammaproteobacteria | Salmonella enterica                                   | hypothetical protein EU234_19825 [Salmonella enterica].                                            | GCA_005655905.1 |
| EAS2553591.1 | TPR+GreAB-C+PIN*→                        | TPR+GreAB-C+PIN       | 590  | DMT50_24325     | Gammaproteobacteria | Salmonella enterica                                   | hypothetical protein DMT50_24325, partial [Salmonella enterica].                                   | GCA_005679955.1 |
| EAS5437941.1 | TPR+GreAB-C+PIN*→                        | TPR+GreAB-C+PIN       | 985  | D8Z11_24970     | Gammaproteobacteria | Salmonella enterica                                   | hypothetical protein D8Z11_24970 [Salmonella enterica].                                            | GCA_005692135.1 |
| EAT5893226.1 | HetE-N1→ TPR+GreAB-C+PIN*→               | TPR+GreAB-C+PIN       | 1106 | E3L72_21800     | Gammaproteobacteria | Salmonella enterica                                   | hypothetical protein E3L72_21800 [Salmonella enterica].                                            | GCA_005737135.1 |
| EAT6283696.1 | HetE-N1→ TPR+GreAB-C+PIN*→               | TPR+GreAB-C+PIN       | 843  | E5797_05930     | Gammaproteobacteria | Salmonella enterica                                   | hypothetical protein E5797_05930, partial [Salmonella enterica].                                   | GCA_005739275.1 |
| EAV44914.1   | REase+TPR+GreAB-C+PIN*→                  | REase+TPR+GreAB-C+PIN | 1295 | SIAM614_12903   | Alphaproteobacteria | Labrenzia aggregata IAM 12614                         | hypothetical protein SIAM614_12903 [Labrenzia aggregata IAM 12614].                                | GCA_000168975.1 |
| EAW0681535.1 | HetE-N1→ TPR+GreAB-C+PIN+TM+TM*→         | TPR+GreAB-C+PIN+TM+TM | 1106 | AIB54_02885     | Gammaproteobacteria | Salmonella enterica                                   | hypothetical protein AIB54_02885 [Salmonella enterica].                                            | GCA_005896365.1 |
| EAW0902300.1 | TPR+GreAB-C+PIN*→                        | TPR+GreAB-C+PIN       | 638  | B2H02_24145     | Gammaproteobacteria | Salmonella enterica                                   | hypothetical protein B2H02_24145, partial [Salmonella enterica].                                   | GCA_005898285.1 |
| EAY5481430.1 | HetE-N1→ TPR+GreAB-C+PIN*→               | TPR+GreAB-C+PIN       | 858  | MB58_12360      | Gammaproteobacteria | Salmonella enterica                                   | hypothetical protein MB58_12360, partial [Salmonella enterica].                                    | GCA_006012385.1 |

| acc          | operon                                   | architecture    | len  | gen.name    | taxend              | species                                               | define                                                                                             | gca             |
|--------------|------------------------------------------|-----------------|------|-------------|---------------------|-------------------------------------------------------|----------------------------------------------------------------------------------------------------|-----------------|
| EBD0849223.1 | HetE-N1→ TPR+GreAB-C+PIN*→               | TPR+GreAB-C+PIN | 970  | FHN97_07895 | Gammaproteobacteria | Salmonella enterica                                   | hypothetical protein FHN97_07895, partial [Salmonella enterica].                                   | GCA_006217605.1 |
| EBD3738487.1 | HetE-N1→ TPR+GreAB-C+PIN*→               | TPR+GreAB-C+PIN | 1107 | CRZ11_10865 | Gammaproteobacteria | Salmonella enterica                                   | hypothetical protein CRZ11_10865 [Salmonella enterica].                                            | GCA_006248335.1 |
| EBD8181391.1 | TPR+GreAB-C+PIN*→                        | TPR+GreAB-C+PIN | 606  | C6600_23545 | Gammaproteobacteria | Salmonella enterica                                   | hypothetical protein C6600_23545 [Salmonella enterica].                                            | GCA_006268595.1 |
| EBF2432475.1 | HetE-N1→ TPR+GreAB-C+PIN*→               | TPR+GreAB-C+PIN | 986  | DKG18_08085 | Gammaproteobacteria | Salmonella enterica                                   | hypothetical protein DKG18_08085, partial [Salmonella enterica].                                   | GCA_006332345.1 |
| EBF2786917.1 | TPR+GreAB-C+PIN*→                        | TPR+GreAB-C+PIN | 738  | C2240_24885 | Gammaproteobacteria | Salmonella enterica subsp. enterica serovar Corvallis | hypothetical protein C2240_24885, partial [Salmonella enterica subsp. enterica serovar Corvallis]. | GCA_006331745.1 |
| EBF4219990.1 | HetE-N1→ TPR+GreAB-C+PIN*→               | TPR+GreAB-C+PIN | 702  | FH403_17525 | Gammaproteobacteria | Salmonella enterica                                   | hypothetical protein FH403_17525, partial [Salmonella enterica].                                   | GCA_006342775.1 |
| EBG7115752.1 | HetE-N1→ TPR+GreAB-C+PIN*→               | TPR+GreAB-C+PIN | 822  | FJA42_18775 | Gammaproteobacteria | Salmonella enterica                                   | hypothetical protein FJA42_18775, partial [Salmonella enterica].                                   | GCA_006457615.1 |
| EBI5135933.1 | TPR+GreAB-C+PIN*→                        | TPR+GreAB-C+PIN | 642  | DQO15_25245 | Gammaproteobacteria | Salmonella enterica                                   | hypothetical protein DQO15_25245, partial [Salmonella enterica].                                   | GCA_006559185.1 |
| EBI9233829.1 | HetE-N1→ TPR+GreAB-C+PIN*→               | TPR+GreAB-C+PIN | 670  | DLA64_23180 | Gammaproteobacteria | Salmonella enterica                                   | hypothetical protein DLA64_23180, partial [Salmonella enterica].                                   | GCA_006576485.1 |
| EBI9496533.1 | TPR+GreAB-C+PIN*→                        | TPR+GreAB-C+PIN | 749  | DLP94_24755 | Gammaproteobacteria | Salmonella enterica                                   | hypothetical protein DLP94_24755, partial [Salmonella enterica].                                   | GCA_006578745.1 |
| EBK5150964.1 | HetE-N1→ TPR+GreAB-C+PIN*→               | TPR+GreAB-C+PIN | 786  | DON25_22080 | Gammaproteobacteria | Salmonella enterica                                   | hypothetical protein DON25_22080, partial [Salmonella enterica].                                   | GCA_006645025.1 |
| EBL0898297.1 | HetE-N1→ TPR+GreAB-C+PIN*→?→   <-Trypsin | TPR+GreAB-C+PIN | 1121 | D0R07_07295 | Gammaproteobacteria | Salmonella enterica                                   | hypothetical protein D0R07_07295 [Salmonella enterica].                                            | GCA_006670825.1 |
| EBM3541219.1 | HetE-N1→ TPR+GreAB-C+PIN*→               | TPR+GreAB-C+PIN | 1117 | DYJ09_14310 | Gammaproteobacteria | Salmonella enterica                                   | hypothetical protein DYJ09_14310 [Salmonella enterica].                                            | GCA_006729905.1 |
| EBM4506587.1 | TPR+GreAB-C+PIN*→                        | TPR+GreAB-C+PIN | 652  | DZ654_25740 | Gammaproteobacteria | Salmonella enterica                                   | hypothetical protein DZ654_25740, partial [Salmonella enterica].                                   | GCA_006730405.1 |
| EBM4858227.1 | TPR+GreAB-C+PIN*→                        | TPR+GreAB-C+PIN | 648  | D0R05_25725 | Gammaproteobacteria | Salmonella enterica                                   | hypothetical protein D0R05_25725, partial [Salmonella enterica].                                   | GCA_006733825.1 |
| EBM6537845.1 | HetE-N1→ TPR+GreAB-C+PIN*→               | TPR+GreAB-C+PIN | 1028 | D2U20_21570 | Gammaproteobacteria | Salmonella enterica                                   | hypothetical protein D2U20_21570, partial [Salmonella enterica].                                   | GCA_006740525.1 |
| EBO1039185.1 | TPR+GreAB-C+PIN*→                        | TPR+GreAB-C+PIN | 643  | D3T71_25030 | Gammaproteobacteria | Salmonella enterica                                   | hypothetical protein D3T71_25030, partial [Salmonella enterica].                                   | GCA_006805285.1 |
| EBQ9134585.1 | TPR+GreAB-C+PIN*→                        | TPR+GreAB-C+PIN | 707  | DK746_24010 | Gammaproteobacteria | Salmonella enterica subsp. enterica serovar Corvallis | hypothetical protein DK746_24010, partial [Salmonella enterica subsp. enterica serovar Corvallis]. | GCA_006932075.1 |
| EBR0236973.1 | TPR+GreAB-C+PIN*→                        | TPR+GreAB-C+PIN | 757  | DNV25_24155 | Gammaproteobacteria | Salmonella enterica subsp. enterica serovar Corvallis | hypothetical protein DNV25_24155, partial [Salmonella enterica subsp. enterica serovar Corvallis]. | GCA_006936135.1 |
| EBS1151706.1 | TPR+GreAB-C+PIN*→                        | TPR+GreAB-C+PIN | 1007 | D6P66_23730 | Gammaproteobacteria | Salmonella enterica subsp. enterica serovar Corvallis | hypothetical protein D6P66_23730 [Salmonella enterica subsp. enterica serovar Corvallis].          | GCA_006989745.1 |
| EBS2228649.1 | TPR+GreAB-C+PIN*→                        | TPR+GreAB-C+PIN | 684  | DRL12_24325 | Gammaproteobacteria | Salmonella enterica subsp. enterica serovar Corvallis | hypothetical protein DRL12_24325, partial [Salmonella enterica subsp. enterica serovar Corvallis]. | GCA_006993385.1 |
| EBS6357254.1 | HetE-N1→ TPR+GreAB-C+PIN*→               | TPR+GreAB-C+PIN | 999  | D4E88_23815 | Gammaproteobacteria | Salmonella enterica subsp. enterica serovar Albany    | hypothetical protein D4E88_23815, partial [Salmonella enterica subsp. enterica serovar Albany].    | GCA_007016725.1 |
| EBU7006421.1 | TPR+GreAB-C+PIN*→                        | TPR+GreAB-C+PIN | 620  | DKU11_24275 | Gammaproteobacteria | Salmonella enterica subsp. enterica serovar Kintambo  | hypothetical protein DKU11_24275, partial [Salmonella enterica subsp. enterica serovar Kintambo].  | GCA_007139165.1 |

| acc          | operon                     | architecture    | len  | gen.name    | taxend              | species                                                 | define                                                                                               | gca             |
|--------------|----------------------------|-----------------|------|-------------|---------------------|---------------------------------------------------------|------------------------------------------------------------------------------------------------------|-----------------|
| EBU7167144.1 | HetE-N1→ TPR+GreAB-C+PIN*→ | TPR+GreAB-C+PIN | 1106 | DKU92_07615 | Gammaproteobacteria | Salmonella enterica subsp. enterica serovar Stockholm   | hypothetical protein DKU92_07615 [Salmonella enterica subsp. enterica serovar Stockholm].            | GCA_007140245.1 |
| EBV1256929.1 | TPR+GreAB-C+PIN*→          | TPR+GreAB-C+PIN | 719  | DNW25_24775 | Gammaproteobacteria | Salmonella enterica subsp. enterica serovar Corvallis   | hypothetical protein DNW25_24775, partial [Salmonella enterica subsp. enterica serovar Corvallis].   | GCA_007158045.1 |
| EBV2191014.1 | HetE-N1→ TPR+GreAB-C+PIN*→ | TPR+GreAB-C+PIN | 1106 | DN155_01500 | Gammaproteobacteria | Salmonella enterica subsp. enterica serovar Afula       | hypothetical protein DN155_01500 [Salmonella enterica subsp. enterica serovar Afula].                | GCA_007161245.1 |
| EBV8290347.1 | HetE-N1→ TPR+GreAB-C+PIN*→ | TPR+GreAB-C+PIN | 704  | AUE34_22015 | Gammaproteobacteria | Salmonella enterica subsp. arizonae serovar 18:z4,z23:- | hypothetical protein AUE34_22015, partial [Salmonella enterica subsp. arizonae serovar 18:z4,z23:-]. | GCA_007188075.1 |
| EBV8290357.1 | TPR+GreAB-C+PIN*→          | TPR+GreAB-C+PIN | 385  | AUE34_22090 | Gammaproteobacteria | Salmonella enterica subsp. arizonae serovar 18:z4,z23:- | hypothetical protein AUE34_22090, partial [Salmonella enterica subsp. arizonae serovar 18:z4,z23:-]. | GCA_007188075.1 |
| EBV8849078.1 | HetE-N1→ TPR+GreAB-C+PIN*→ | TPR+GreAB-C+PIN | 1000 | AUA06_21700 | Gammaproteobacteria | Salmonella enterica subsp. arizonae serovar 18:z4,z23:- | hypothetical protein AUA06_21700, partial [Salmonella enterica subsp. arizonae serovar 18:z4,z23:-]. | GCA_007190395.1 |
| EBV8917369.1 | HetE-N1→ TPR+GreAB-C+PIN*→ | TPR+GreAB-C+PIN | 688  | ASH63_21975 | Gammaproteobacteria | Salmonella enterica subsp. arizonae serovar 18:z4,z23:- | hypothetical protein ASH63_21975, partial [Salmonella enterica subsp. arizonae serovar 18:z4,z23:-]. | GCA_007194415.1 |
| EBV9159081.1 | TPR+GreAB-C+PIN*→          | TPR+GreAB-C+PIN | 620  | ASA02_25470 | Gammaproteobacteria | Salmonella enterica subsp. enterica serovar Alachua     | hypothetical protein ASA02_25470, partial [Salmonella enterica subsp. enterica serovar Alachua].     | GCA_007191635.1 |
| EBV9391419.1 | HetE-N1→ TPR+GreAB-C+PIN*→ | TPR+GreAB-C+PIN | 665  | AUA09_21865 | Gammaproteobacteria | Salmonella enterica subsp. arizonae serovar 18:z4,z23:- | hypothetical protein AUA09_21865, partial [Salmonella enterica subsp. arizonae serovar 18:z4,z23:-]. | GCA_007194695.1 |
| EBV9454977.1 | TPR+GreAB-C*→              | TPR+GreAB-C     | 257  | AUA11_22355 | Gammaproteobacteria | Salmonella enterica subsp. arizonae serovar 18:z4,z23:- | hypothetical protein AUA11_22355, partial [Salmonella enterica subsp. arizonae serovar 18:z4,z23:-]. | GCA_007193095.1 |
| EBV9865076.1 | TPR+GreAB-C*→              | TPR+GreAB-C     | 371  | AUA58_21825 | Gammaproteobacteria | Salmonella enterica subsp. arizonae serovar 18:z4,z23:- | hypothetical protein AUA58_21825, partial [Salmonella enterica subsp. arizonae serovar 18:z4,z23:-]. | GCA_007194715.1 |
| EBV9897412.1 | TPR+GreAB-C*→              | TPR+GreAB-C     | 379  | AUA59_22385 | Gammaproteobacteria | Salmonella enterica subsp. arizonae serovar 18:z4,z23:- | hypothetical protein AUA59_22385, partial [Salmonella enterica subsp. arizonae serovar 18:z4,z23:-]. | GCA_007194855.1 |
| EBW0217976.1 | HetE-N1→ TPR+GreAB-C+PIN*→ | TPR+GreAB-C+PIN | 1107 | AUA78_22040 | Gammaproteobacteria | Salmonella enterica subsp. arizonae serovar 18:z4,z23:- | hypothetical protein AUA78_22040 [Salmonella enterica subsp. arizonae serovar 18:z4,z23:-].          | GCA_007204575.1 |
| EBW0231167.1 | HetE-N1→ TPR+GreAB-C+PIN*→ | TPR+GreAB-C+PIN | 990  | AUA77_22025 | Gammaproteobacteria | Salmonella enterica subsp. arizonae serovar 18:z4,z23:- | hypothetical protein AUA77_22025, partial [Salmonella enterica subsp. arizonae serovar 18:z4,z23:-]. | GCA_007204595.1 |
| EBW0678507.1 | TPR+GreAB-C+PIN*→          | TPR+GreAB-C+PIN | 861  | AR803_21985 | Gammaproteobacteria | Salmonella enterica subsp. arizonae serovar 18:z4,z23:- | hypothetical protein AR803_21985, partial [Salmonella enterica subsp. arizonae serovar 18:z4,z23:-]. | GCA_007197055.1 |
| EBW5988048.1 | TPR+GreAB-C+PIN*→          | TPR+GreAB-C+PIN | 813  | AUB18_21995 | Gammaproteobacteria | Salmonella enterica subsp. arizonae serovar 18:z4,z23:- | hypothetical protein AUB18_21995, partial [Salmonella enterica subsp. arizonae serovar 18:z4,z23:-]. | GCA_007217995.1 |
| EBW8169800.1 | TPR+GreAB-C*→              | TPR+GreAB-C     | 283  | AUB36_22265 | Gammaproteobacteria | Salmonella enterica subsp. arizonae serovar 18:z4,z23:- | hypothetical protein AUB36_22265, partial [Salmonella enterica subsp. arizonae serovar 18:z4,z23:-]. | GCA_007226835.1 |
| EBW9751630.1 | HetE-N1→ TPR+GreAB-C+PIN*→ | TPR+GreAB-C+PIN | 1106 | DQR71_22645 | Gammaproteobacteria | Salmonella enterica subsp. enterica serovar Kingston    | hypothetical protein DQR71_22645 [Salmonella enterica subsp. enterica serovar Kingston].             | GCA_007234155.1 |

| acc          | operon                                      | architecture    | len  | gen.name    | taxend              | species                                               | define                                                                                             | gca             |
|--------------|---------------------------------------------|-----------------|------|-------------|---------------------|-------------------------------------------------------|----------------------------------------------------------------------------------------------------|-----------------|
| EBX0426906.1 | HetE-N1→ TPR+GreAB-C+PIN*→                  | TPR+GreAB-C+PIN | 864  | DP854_08040 | Gammaproteobacteria | Salmonella enterica subsp. enterica serovar Corvallis | hypothetical protein DP854_08040, partial [Salmonella enterica subsp. enterica serovar Corvallis]. | GCA_007237735.1 |
| EBX5460983.1 | HetE-N1→ TPR+GreAB-C+PIN*→                  | TPR+GreAB-C+PIN | 817  | DSN29_17980 | Gammaproteobacteria | Salmonella enterica subsp. enterica serovar Corvallis | hypothetical protein DSN29_17980, partial [Salmonella enterica subsp. enterica serovar Corvallis]. | GCA_007257955.1 |
| EBX5569113.1 | HetE-N1→ TPR+GreAB-C+PIN*→                  | TPR+GreAB-C+PIN | 1106 | DSN37_03170 | Gammaproteobacteria | Salmonella enterica subsp. enterica serovar Kuessel   | hypothetical protein DSN37_03170 [Salmonella enterica subsp. enterica serovar Kuessel].            | GCA_007259425.1 |
| EBX6009347.1 | TPR+GreAB-C+PIN*→                           | TPR+GreAB-C+PIN | 1021 | DSR61_24855 | Gammaproteobacteria | Salmonella enterica subsp. enterica serovar Corvallis | hypothetical protein DSR61_24855, partial [Salmonella enterica subsp. enterica serovar Corvallis]. | GCA_007258725.1 |
| EBY0196060.1 | HetE-N1→ TPR+GreAB-C+PIN*→                  | TPR+GreAB-C+PIN | 991  | DUP89_08940 | Gammaproteobacteria | Salmonella enterica subsp. enterica serovar Corvallis | hypothetical protein DUP89_08940, partial [Salmonella enterica subsp. enterica serovar Corvallis]. | GCA_007275795.1 |
| EBY1533788.1 | HetE-N1→?→ TPR+GreAB-C+PIN*→                | TPR+GreAB-C+PIN | 775  | DTD21_03800 | Gammaproteobacteria | Salmonella enterica subsp. enterica serovar Mgulani   | hypothetical protein DTD21_03800 [Salmonella enterica subsp. enterica serovar Mgulani].            | GCA_007282305.1 |
| EBY3547778.1 | HetE-N1→ TPR+GreAB-C+PIN*→                  | TPR+GreAB-C+PIN | 781  | D4F04_22510 | Gammaproteobacteria | Salmonella enterica subsp. enterica serovar Corvallis | hypothetical protein D4F04_22510, partial [Salmonella enterica subsp. enterica serovar Corvallis]. | GCA_007290715.1 |
| ECB7917957.1 | HetE-N1→ TPR+GreAB-C+PIN*→                  | TPR+GreAB-C+PIN | 841  | E1365_23450 | Gammaproteobacteria | Salmonella enterica subsp. enterica serovar Corvallis | hypothetical protein E1365_23450, partial [Salmonella enterica subsp. enterica serovar Corvallis]. | GCA_007440385.1 |
| ECC0701089.1 | HetE-N1→?→ TPR+GreAB-C+PIN*→                | TPR+GreAB-C+PIN | 815  | FMV45_11650 | Gammaproteobacteria | Salmonella enterica subsp. enterica serovar Mgulani   | hypothetical protein FMV45_11650 [Salmonella enterica subsp. enterica serovar Mgulani].            | GCA_007457195.1 |
| ECC3303083.1 | TPR+GreAB-C+PIN*→                           | TPR+GreAB-C+PIN | 878  | ACP91_22675 | Gammaproteobacteria | Salmonella enterica subsp. arizonae                   | hypothetical protein ACP91_22675, partial [Salmonella enterica subsp. arizonae].                   | GCA_007472415.1 |
| ECC9297450.1 | TPR+GreAB-C+PIN*→?→   <-Trypsin             | TPR+GreAB-C+PIN | 1011 | DRF02_24595 | Gammaproteobacteria | Salmonella enterica subsp. salamae                    | hypothetical protein DRF02_24595 [Salmonella enterica subsp. salamae].                             | GCA_007500125.1 |
| ECE0143412.1 | TPR+GreAB-C+PIN*→                           | TPR+GreAB-C+PIN | 625  | NC53_22885  | Gammaproteobacteria | Salmonella enterica subsp. arizonae                   | hypothetical protein NC53_22885, partial [Salmonella enterica subsp. arizonae].                    | GCA_007547655.1 |
| ECE0541238.1 | TPR+GreAB-C+PIN*→                           | TPR+GreAB-C+PIN | 879  | ACK19_22505 | Gammaproteobacteria | Salmonella enterica subsp. arizonae                   | hypothetical protein ACK19_22505, partial [Salmonella enterica subsp. arizonae].                   | GCA_007549055.1 |
| ECE0545534.1 | TPR+GreAB-C*→                               | TPR+GreAB-C     | 384  | ACK84_23000 | Gammaproteobacteria | Salmonella enterica subsp. arizonae                   | hypothetical protein ACK84_23000, partial [Salmonella enterica subsp. arizonae].                   | GCA_007549175.1 |
| ECE0554408.1 | HetE-N1→ TPR+GreAB-C+PIN*→                  | TPR+GreAB-C+PIN | 669  | ACK35_22635 | Gammaproteobacteria | Salmonella enterica subsp. arizonae                   | hypothetical protein ACK35_22635, partial [Salmonella enterica subsp. arizonae].                   | GCA_007549195.1 |
| ECE0554409.1 | TPR+GreAB-C+PIN*→                           | TPR+GreAB-C+PIN | 428  | ACK35_22640 | Gammaproteobacteria | Salmonella enterica subsp. arizonae                   | hypothetical protein ACK35_22640, partial [Salmonella enterica subsp. arizonae].                   | GCA_007549195.1 |
| ECE1015908.1 | HetE-N1→ TPR+GreAB-C+PIN*→                  | TPR+GreAB-C+PIN | 1116 | AHY48_24995 | Gammaproteobacteria | Salmonella enterica subsp. enterica                   | hypothetical protein AHY48_24995 [Salmonella enterica subsp. enterica].                            | GCA_007551035.1 |
| ECF6862263.1 | TPR+GreAB-C+PIN*→                           | TPR+GreAB-C+PIN | 985  | C702_18880  | Gammaproteobacteria | Salmonella enterica subsp. enterica serovar Labadi    | hypothetical protein C702_18880 [Salmonella enterica subsp. enterica serovar Labadi].              | GCA_007627255.1 |
| ECF7216075.1 | HetE-N1→ TPR+GreAB-C+PIN*→                  | TPR+GreAB-C+PIN | 985  | ACL93_22670 | Gammaproteobacteria | Salmonella enterica subsp. arizonae                   | hypothetical protein ACL93_22670, partial [Salmonella enterica subsp. arizonae].                   | GCA_007627105.1 |
| ECF7535990.1 | HetE-N1→ TPR+GreAB-C+PIN*→                  | TPR+GreAB-C+PIN | 866  | AF553_23825 | Gammaproteobacteria | Salmonella enterica subsp. enterica                   | hypothetical protein AF553_23825, partial [Salmonella enterica subsp. enterica].                   | GCA_007629935.1 |
| ECG8314709.1 | HetE-N1→ TPR+GreAB-C+PIN*→                  | TPR+GreAB-C+PIN | 967  | E1871_22275 | Gammaproteobacteria | Salmonella enterica subsp. enterica serovar Mgulani   | hypothetical protein E1871_22275 [Salmonella enterica subsp. enterica serovar Mgulani].            | GCA_007694365.1 |
| ECH7956768.1 | HetE-N1→ TPR+GreAB-C+PIN*→                  | TPR+GreAB-C+PIN | 731  | SW47_20185  | Gammaproteobacteria | Salmonella enterica subsp. enterica                   | hypothetical protein SW47_20185, partial [Salmonella enterica subsp. enterica].                    | GCA_007742835.1 |
| ECH9260474.1 | HetE-N1→ TPR+GreAB-C+PIN→ TPR+GreAB-C+PIN*→ | TPR+GreAB-C+PIN | 654  | YR28_14840  | Gammaproteobacteria | Salmonella enterica subsp. enterica                   | hypothetical protein YR28_14840 [Salmonella enterica subsp. enterica].                             | GCA_007749495.1 |

| acc          | operon                                                                                 | architecture    | len  | gen.name    | taxend              | species                                                 | define                                                                                               | gca             |
|--------------|----------------------------------------------------------------------------------------|-----------------|------|-------------|---------------------|---------------------------------------------------------|------------------------------------------------------------------------------------------------------|-----------------|
| ECI0362610.1 | HetE-N1→ TPR+GreAB-C+PIN*→                                                             | TPR+GreAB-C+PIN | 969  | ACK10_22270 | Gammaproteobacteria | Salmonella enterica subsp. arizonae                     | hypothetical protein ACK10_22270, partial [Salmonella enterica subsp. arizonae].                     | GCA_007755195.1 |
| ECI0389037.1 | TPR+GreAB-C*→                                                                          | TPR+GreAB-C     | 376  | ACL48_23155 | Gammaproteobacteria | Salmonella enterica subsp. arizonae                     | hypothetical protein ACL48_23155, partial [Salmonella enterica subsp. arizonae].                     | GCA_007754635.1 |
| ECI1216662.1 | TPR+GreAB-C+PIN*→                                                                      | TPR+GreAB-C+PIN | 836  | AF582_21855 | Gammaproteobacteria | Salmonella enterica subsp. arizonae                     | hypothetical protein AF582_21855, partial [Salmonella enterica subsp. arizonae].                     | GCA_007758765.1 |
| ECI5614625.1 | HetE-N1→?→ TPR+GreAB-C+PIN*→                                                           | TPR+GreAB-C+PIN | 655  | AHW94_03505 | Gammaproteobacteria | Salmonella enterica subsp. enterica                     | hypothetical protein AHW94_03505, partial [Salmonella enterica subsp. enterica].                     | GCA_007777085.1 |
| ECM8537065.1 | HetE-N1→ TPR+GreAB-C+PIN*→                                                             | TPR+GreAB-C+PIN | 1117 | YI35_19225  | Gammaproteobacteria | Salmonella enterica subsp. enterica serovar Corvallis   | hypothetical protein YI35_19225 [Salmonella enterica subsp. enterica serovar Corvallis].             | GCA_008050935.1 |
| ECS4963358.1 | TPR+GreAB-C+PIN*→                                                                      | TPR+GreAB-C+PIN | 874  | A9T74_22060 | Gammaproteobacteria | Salmonella enterica subsp. arizonae serovar 18:z4,z23:- | hypothetical protein A9T74_22060, partial [Salmonella enterica subsp. arizonae serovar 18:z4,z23:-]. | GCA_008426085.1 |
| ECS5089259.1 | TPR+GreAB-C+PIN*→                                                                      | TPR+GreAB-C+PIN | 688  | A9T03_21360 | Gammaproteobacteria | Salmonella enterica subsp. arizonae serovar 18:z4,z23:- | hypothetical protein A9T03_21360, partial [Salmonella enterica subsp. arizonae serovar 18:z4,z23:-]. | GCA_008426245.1 |
| ECS5722565.1 | HetE-N1→ TPR+GreAB-C+PIN*→                                                             | TPR+GreAB-C+PIN | 763  | BEE21_21925 | Gammaproteobacteria | Salmonella enterica                                     | hypothetical protein BEE21_21925, partial [Salmonella enterica].                                     | GCA_008427725.1 |
| ECS7544753.1 | HetE-N1→ TPR+GreAB-C+PIN*→?→   <-Trypsin                                               | TPR+GreAB-C+PIN | 1121 | CI474_11845 | Gammaproteobacteria | Salmonella enterica subsp. enterica serovar Denver      | hypothetical protein CI474_11845 [Salmonella enterica subsp. enterica serovar Denver].               | GCA_008435705.1 |
| ECU7350952.1 | TPR+GreAB-C+PIN*→                                                                      | TPR+GreAB-C+PIN | 816  | A9S02_22180 | Gammaproteobacteria | Salmonella enterica subsp. enterica serovar Kentucky    | hypothetical protein A9S02_22180, partial [Salmonella enterica subsp. enterica serovar Kentucky].    | GCA_008522685.1 |
| ECV0014755.1 | TPR+GreAB-C+PIN*→                                                                      | TPR+GreAB-C+PIN | 672  | C9G23_25520 | Gammaproteobacteria | Salmonella enterica                                     | hypothetical protein C9G23_25520 [Salmonella enterica].                                              | GCA_008534115.1 |
| ECX3800078.1 | HetE-N1→ TPR+GreAB-C+PIN*→                                                             | TPR+GreAB-C+PIN | 647  | F6B58_20445 | Gammaproteobacteria | Salmonella enterica                                     | hypothetical protein F6B58_20445, partial [Salmonella enterica].                                     | GCA_008659475.1 |
| ECY0836069.1 | MarR-HTH→   <-PSE  PSE→   <-?  ?→?→   <-?  ?→ HetE-N1→ TPR+GreAB-C+PIN*→?→   <-Trypsin | TPR+GreAB-C+PIN | 1121 | F6Y43_14905 | Gammaproteobacteria | Salmonella enterica subsp. enterica                     | hypothetical protein F6Y43_14905 [Salmonella enterica subsp. enterica].                              | GCA_008716255.1 |
| ECY8988972.1 | HetE-N1→ TPR+GreAB-C+PIN*→                                                             | TPR+GreAB-C+PIN | 1117 | F7L41_18095 | Gammaproteobacteria | Salmonella enterica                                     | hypothetical protein F7L41_18095 [Salmonella enterica].                                              | GCA_008760695.1 |
| ECZ2850292.1 | TPR+GreAB-C+PIN*→                                                                      | TPR+GreAB-C+PIN | 736  | F7T15_22920 | Gammaproteobacteria | Salmonella enterica                                     | hypothetical protein F7T15_22920, partial [Salmonella enterica].                                     | GCA_008785865.1 |
| EDA5083812.1 | HetE-N1→ TPR+GreAB-C+PIN*→                                                             | TPR+GreAB-C+PIN | 861  | F9F62_19420 | Gammaproteobacteria | Salmonella enterica                                     | hypothetical protein F9F62_19420, partial [Salmonella enterica].                                     | GCA_008860845.1 |
| EDB4036569.1 | HetE-N1→ TPR+GreAB-C+PIN*→                                                             | TPR+GreAB-C+PIN | 810  | A6J23_15240 | Gammaproteobacteria | Salmonella enterica                                     | hypothetical protein A6J23_15240, partial [Salmonella enterica].                                     | GCA_008904195.1 |
| EDB4763898.1 | TPR+GreAB-C+PIN*→                                                                      | TPR+GreAB-C+PIN | 985  | A8H08_23565 | Gammaproteobacteria | Salmonella enterica subsp. enterica serovar Corvallis   | hypothetical protein A8H08_23565 [Salmonella enterica subsp. enterica serovar Corvallis].            | GCA_008907365.1 |
| EDB6166846.1 | HetE-N1→ TPR+GreAB-C+PIN*→                                                             | TPR+GreAB-C+PIN | 994  | BBD73_10015 | Gammaproteobacteria | Salmonella enterica subsp. enterica serovar Corvallis   | hypothetical protein BBD73_10015, partial [Salmonella enterica subsp. enterica serovar Corvallis].   | GCA_008914005.1 |
| EDN4259744.1 | HetE-N1→ TPR+GreAB-C+PIN*→                                                             | TPR+GreAB-C+PIN | 840  | Y652_004461 | Gammaproteobacteria | Salmonella enterica subsp. enterica                     | hypothetical protein Y652_004461, partial [Salmonella enterica subsp. enterica].                     | GCA_009997765.1 |
| EDO1617810.1 | HetE-N1→ TPR+GreAB-C+PIN*→                                                             | TPR+GreAB-C+PIN | 838  | CVA64_22730 | Gammaproteobacteria | Salmonella enterica subsp. enterica serovar Molade      | hypothetical protein CVA64_22730, partial [Salmonella enterica subsp. enterica serovar Molade].      | GCA_010125745.1 |
| EDP8916875.1 | HetE-N1→ TPR+GreAB-C+PIN*→                                                             | TPR+GreAB-C+PIN | 775  | ZT80_004634 | Gammaproteobacteria | Salmonella enterica subsp. enterica serovar Chailey     | hypothetical protein ZT80_004634, partial [Salmonella enterica subsp. enterica serovar Chailey].     | GCA_010369345.1 |

| acc          | operon                                                                   | architecture    | len  | gen.name     | taxend              | species                                               | define                                                                                            | gca             |
|--------------|--------------------------------------------------------------------------|-----------------|------|--------------|---------------------|-------------------------------------------------------|---------------------------------------------------------------------------------------------------|-----------------|
| EDP9779517.1 | HetE-N1→ TPR+GreAB-C+PIN*→                                               | TPR+GreAB-C+PIN | 844  | A9223_002456 | Gammaproteobacteria | Salmonella enterica subsp. enterica serovar Alachua   | hypothetical protein A9223_002456, partial [Salmonella enterica subsp. enterica serovar Alachua]. | GCA_010373825.1 |
| EDR2934822.1 | HetE-N1→ TPR+GreAB-C+PIN*→                                               | TPR+GreAB-C+PIN | 754  | KS39_001997  | Gammaproteobacteria | Salmonella enterica subsp. enterica serovar Ruiru     | hypothetical protein KS39_001997, partial [Salmonella enterica subsp. enterica serovar Ruiru].    | GCA_010439595.1 |
| EDR3921234.1 | <-HTH<-?<-PSE  HetE-N1→ TPR+GreAB-C+PIN*→                                | TPR+GreAB-C+PIN | 1101 | BWC65_003323 | Gammaproteobacteria | Salmonella enterica                                   | hypothetical protein BWC65_003323 [Salmonella enterica].                                          | GCA_010444135.1 |
| EDR7156767.1 | HetE-N1→ TPR+GreAB-C+PIN→ TPR+GreAB-C+PIN*→                              | TPR+GreAB-C+PIN | 457  | GRJ98_004481 | Gammaproteobacteria | Salmonella enterica                                   | hypothetical protein GRJ98_004481 [Salmonella enterica].                                          | GCA_010460165.1 |
| EDR9691108.1 | TPR+GreAB-C+PIN*→                                                        | TPR+GreAB-C+PIN | 644  | CSL67_004218 | Gammaproteobacteria | Salmonella enterica subsp. arizonae                   | hypothetical protein CSL67_004218 [Salmonella enterica subsp. arizonae].                          | GCA_010471185.1 |
| EDT9803200.1 | HetE-N1→ TPR+GreAB-C+PIN*→                                               | TPR+GreAB-C+PIN | 828  | GQ119_004456 | Gammaproteobacteria | Salmonella enterica                                   | hypothetical protein GQ119_004456, partial [Salmonella enterica].                                 | GCA_010569565.1 |
| EDU6324669.1 | HetE-N1→ TPR+GreAB-C+PIN*→?→   <-Trypsin                                 | TPR+GreAB-C+PIN | 1121 | CAE39_004078 | Gammaproteobacteria | Salmonella enterica subsp. enterica serovar Edinburgh | hypothetical protein CAE39_004078 [Salmonella enterica subsp. enterica serovar Edinburgh].        | GCA_010619425.1 |
| EDV9361828.1 | HetE-N1→ TPR+GreAB-C+PIN*→                                               | TPR+GreAB-C+PIN | 870  | QG02_001683  | Gammaproteobacteria | Salmonella enterica subsp. enterica                   | hypothetical protein QG02_001683, partial [Salmonella enterica subsp. enterica].                  | GCA_010676285.1 |
| EDW0654491.1 | <-HTH<-?<-?  HetE-N1→ TPR+GreAB-C+PIN*→                                  | TPR+GreAB-C+PIN | 1106 | JU54_004053  | Gammaproteobacteria | Salmonella enterica subsp. enterica serovar Weslaco   | hypothetical protein JU54_004053 [Salmonella enterica subsp. enterica serovar Weslaco].           | GCA_010695505.1 |
| EDW1854316.1 | TPR+GreAB-C+PIN*→                                                        | TPR+GreAB-C+PIN | 1107 | S887_003116  | Gammaproteobacteria | Salmonella enterica subsp. diarizonae                 | hypothetical protein S887_003116 [Salmonella enterica subsp. diarizonae].                         | GCA_010701205.1 |
| EDW7381411.1 | HetE-N1→ TPR+GreAB-C+PIN*→                                               | TPR+GreAB-C+PIN | 838  | CJF03_003360 | Gammaproteobacteria | Salmonella enterica subsp. enterica serovar Alachua   | hypothetical protein CJF03_003360, partial [Salmonella enterica subsp. enterica serovar Alachua]. | GCA_010728605.1 |
| EDX0815680.1 | MarR-HTH→   <-PSE  PSE→   <-?  ?→?→   <-?  ?→ HetE-N1→ TPR+GreAB-C+PIN*→ | TPR+GreAB-C+PIN | 1047 | GTA77_003301 | Gammaproteobacteria | Salmonella enterica subsp. enterica                   | hypothetical protein GTA77_003301, partial [Salmonella enterica subsp. enterica].                 | GCA_010745015.1 |
| EDY1906151.1 | MarR-HTH→   <-PSE  PSE→   <-?  ?→?→   <-?  ?→ HetE-N1→ TPR+GreAB-C+PIN*→ | TPR+GreAB-C+PIN | 1043 | GTA76_003216 | Gammaproteobacteria | Salmonella enterica subsp. enterica                   | hypothetical protein GTA76_003216, partial [Salmonella enterica subsp. enterica].                 | GCA_010803285.1 |
| EDY7338112.1 | HetE-N1→ TPR+GreAB-C+PIN*→                                               | TPR+GreAB-C+PIN | 873  | GRN59_004759 | Gammaproteobacteria | Salmonella enterica subsp. enterica serovar Alachua   | hypothetical protein GRN59_004759, partial [Salmonella enterica subsp. enterica serovar Alachua]. | GCA_010827805.1 |
| EDZ6443278.1 | HetE-N1→ TPR+GreAB-C+PIN*→                                               | TPR+GreAB-C+PIN | 813  | GOH01_21475  | Gammaproteobacteria | Salmonella enterica                                   | hypothetical protein GOH01_21475, partial [Salmonella enterica].                                  | GCA_010859905.1 |
| EED4174297.1 | HetE-N1→ TPR+GreAB-C+PIN*→                                               | TPR+GreAB-C+PIN | 944  | S577_12620   | Gammaproteobacteria | Salmonella enterica subsp. enterica serovar Rubislaw  | hypothetical protein S577_12620, partial [Salmonella enterica subsp. enterica serovar Rubislaw].  | GCA_011083145.1 |
| EEG2646873.1 | HetE-N1→ TPR+GreAB-C+PIN*→                                               | TPR+GreAB-C+PIN | 1117 | GXG13_10075  | Gammaproteobacteria | Salmonella enterica                                   | hypothetical protein GXG13_10075 [Salmonella enterica].                                           | GCA_011218655.1 |
| EEH6562392.1 | TPR+GreAB-C+PIN*→                                                        | TPR+GreAB-C+PIN | 561  | G9D83_004649 | Gammaproteobacteria | Salmonella enterica                                   | hypothetical protein G9D83_004649, partial [Salmonella enterica].                                 | GCA_011296115.1 |
| EEH8607740.1 | HetE-N1→ TPR+GreAB-C+PIN*→                                               | TPR+GreAB-C+PIN | 751  | GXG09_15375  | Gammaproteobacteria | Salmonella enterica                                   | hypothetical protein GXG09_15375, partial [Salmonella enterica].                                  | GCA_011310075.1 |
| EEI7790049.1 | TPR+GreAB-C+PIN*→                                                        | TPR+GreAB-C+PIN | 1003 | G7421_004640 | Gammaproteobacteria | Salmonella enterica                                   | hypothetical protein G7421_004640, partial [Salmonella enterica].                                 | GCA_011384105.1 |
| EEJ3916542.1 | HetE-N1→ TPR+GreAB-C+PIN*→                                               | TPR+GreAB-C+PIN | 931  | C1D58_004804 | Gammaproteobacteria | Salmonella enterica subsp. enterica serovar Waral     | hypothetical protein C1D58_004804, partial [Salmonella enterica subsp. enterica serovar Waral].   | GCA_011421105.1 |
| EEJ8590178.1 | HetE-N1→ TPR+GreAB-C+PIN*→                                               | TPR+GreAB-C+PIN | 1106 | YR33_002856  | Gammaproteobacteria | Salmonella enterica subsp. enterica                   | hypothetical protein YR33_002856 [Salmonella enterica subsp. enterica].                           | GCA_011444435.1 |

| acc          | operon                     | architecture    | len  | gen.name     | taxend              | species                                               | define                                                                                              | gca             |
|--------------|----------------------------|-----------------|------|--------------|---------------------|-------------------------------------------------------|-----------------------------------------------------------------------------------------------------|-----------------|
| EEM3099552.1 | HetE-N1→ TPR+GreAB-C+PIN*→ | TPR+GreAB-C+PIN | 837  | C7106_19315  | Gammaproteobacteria | Salmonella enterica subsp. enterica serovar Corvallis | hypothetical protein C7106_19315, partial [Salmonella enterica subsp. enterica serovar Corvallis].  | GCA_011562745.1 |
| EEN9063089.1 | TPR+GreAB-C+PIN*→          | TPR+GreAB-C+PIN | 1003 | G5014_004598 | Gammaproteobacteria | Salmonella enterica subsp. enterica                   | hypothetical protein G5014_004598, partial [Salmonella enterica subsp. enterica].                   | GCA_011642815.1 |
| EEO4791769.1 | GreAB-C*→                  | GreAB-C         | 475  | GCV36_004805 | Gammaproteobacteria | Salmonella enterica                                   | hypothetical protein GCV36_004805, partial [Salmonella enterica].                                   | GCA_011672825.1 |
| EEP6626700.1 | TPR+GreAB-C+PIN*→          | TPR+GreAB-C+PIN | 1098 | HB923_004453 | Gammaproteobacteria | Salmonella enterica                                   | hypothetical protein HB923_004453, partial [Salmonella enterica].                                   | GCA_011737335.1 |
| EEQ0870631.1 | GreAB-C*→                  | GreAB-C         | 401  | HC115_004664 | Gammaproteobacteria | Salmonella enterica subsp. enterica serovar Corvallis | hypothetical protein HC115_004664, partial [Salmonella enterica subsp. enterica serovar Corvallis]. | GCA_011766905.1 |
| EER8058271.1 | HetE-N1→ TPR+GreAB-C+PIN*→ | TPR+GreAB-C+PIN | 1094 | F0645_003838 | Gammaproteobacteria | Escherichia coli                                      | hypothetical protein F0645_003838 [Escherichia coli].                                               | GCA_011871345.1 |
| EES4613658.1 | HetE-N1→ TPR+GreAB-C+PIN*→ | TPR+GreAB-C+PIN | 1094 | EZQ25_003302 | Gammaproteobacteria | Escherichia coli                                      | hypothetical protein EZQ25_003302 [Escherichia coli].                                               | GCA_011897605.1 |
| EEU6346619.1 | TPR+GreAB-C+PIN*→          | TPR+GreAB-C+PIN | 663  | HES36_004810 | Gammaproteobacteria | Salmonella enterica                                   | hypothetical protein HES36_004810, partial [Salmonella enterica].                                   | GCA_011985205.1 |
| EEU8409948.1 | TPR+GreAB-C+PIN*→          | TPR+GreAB-C+PIN | 733  | HDI19_004538 | Gammaproteobacteria | Salmonella enterica                                   | hypothetical protein HDI19_004538, partial [Salmonella enterica].                                   | GCA_012002765.1 |
| EEU8431734.1 | TPR+GreAB-C+PIN*→          | TPR+GreAB-C+PIN | 770  | HDI14_004564 | Gammaproteobacteria | Salmonella enterica                                   | hypothetical protein HDI14_004564, partial [Salmonella enterica].                                   | GCA_012002965.1 |
| EEU8450206.1 | TPR+GreAB-C+PIN*→          | TPR+GreAB-C+PIN | 686  | HDI09_004415 | Gammaproteobacteria | Salmonella enterica                                   | hypothetical protein HDI09_004415, partial [Salmonella enterica].                                   | GCA_012003165.1 |
| EEU8461067.1 | HetE-N1→ TPR+GreAB-C+PIN*→ | TPR+GreAB-C+PIN | 777  | HDI12_003619 | Gammaproteobacteria | Salmonella enterica                                   | hypothetical protein HDI12_003619, partial [Salmonella enterica].                                   | GCA_012003025.1 |
| EEU8472241.1 | HetE-N1→ TPR+GreAB-C+PIN*→ | TPR+GreAB-C+PIN | 832  | HDI08_003001 | Gammaproteobacteria | Salmonella enterica                                   | hypothetical protein HDI08_003001, partial [Salmonella enterica].                                   | GCA_012003185.1 |
| EEU8646489.1 | HetE-N1→ TPR+GreAB-C+PIN*→ | TPR+GreAB-C+PIN | 746  | HDI02_002414 | Gammaproteobacteria | Salmonella enterica                                   | hypothetical protein HDI02_002414, partial [Salmonella enterica].                                   | GCA_012004065.1 |
| EEV5892122.1 | HetE-N1→ TPR+GreAB-C+PIN*→ | TPR+GreAB-C+PIN | 1094 | ELJ91_00185  | Gammaproteobacteria | Escherichia coli                                      | hypothetical protein ELJ91_00185 [Escherichia coli].                                                | GCA_012046565.1 |
| EEW2250301.1 | TPR+GreAB-C+PIN*→          | TPR+GreAB-C+PIN | 649  | D9F29_22745  | Gammaproteobacteria | Escherichia coli                                      | hypothetical protein D9F29_22745, partial [Escherichia coli].                                       | GCA_012074905.1 |
| EEW6232025.1 | TPR+GreAB-C+PIN*→          | TPR+GreAB-C+PIN | 1025 | D7V76_23725  | Gammaproteobacteria | Escherichia coli                                      | hypothetical protein D7V76_23725, partial [Escherichia coli].                                       | GCA_012087875.1 |
| EEZ4464859.1 | HetE-N1→ TPR+GreAB-C+PIN*→ | TPR+GreAB-C+PIN | 1009 | DED50_002664 | Gammaproteobacteria | Escherichia coli                                      | hypothetical protein DED50_002664, partial [Escherichia coli].                                      | GCA_012207825.1 |
| EFA5448049.1 | GreAB-C*→                  | GreAB-C         | 270  | EZF43_26870  | Gammaproteobacteria | Escherichia coli                                      | hypothetical protein EZF43_26870, partial [Escherichia coli].                                       | GCA_012252965.1 |
| EFB4141030.1 | TPR+GreAB-C+PIN*→          | TPR+GreAB-C+PIN | 803  | C0X77_005316 | Gammaproteobacteria | Escherichia coli O88:H1                               | hypothetical protein C0X77_005316, partial [Escherichia coli O88:H1].                               | GCA_012307025.1 |
| EFB7592548.1 | TPR+GreAB-C+PIN*→          | TPR+GreAB-C+PIN | 871  | E4J78_25685  | Gammaproteobacteria | Escherichia coli                                      | hypothetical protein E4J78_25685, partial [Escherichia coli].                                       | GCA_012318985.1 |
| EFD6843528.1 | HetE-N1→ TPR+GreAB-C+PIN*→ | TPR+GreAB-C+PIN | 785  | HG348_004580 | Gammaproteobacteria | Salmonella enterica subsp. enterica serovar Corvallis | hypothetical protein HG348_004580, partial [Salmonella enterica subsp. enterica serovar Corvallis]. | GCA_012407905.1 |
| EFD8840406.1 | TPR+GreAB-C+PIN*→          | TPR+GreAB-C+PIN | 342  | CO273_005362 | Gammaproteobacteria | Escherichia coli                                      | hypothetical protein CO273_005362, partial [Escherichia coli].                                      | GCA_012416985.1 |
| EFE7110517.1 | TPR+GreAB-C+PIN*→          | TPR+GreAB-C+PIN | 631  | GCY86_26975  | Gammaproteobacteria | Escherichia coli                                      | hypothetical protein GCY86_26975, partial [Escherichia coli].                                       | GCA_012449745.1 |

| acc          | operon                                 | architecture            | len  | gen.name     | taxend              | species                                            | define                                                                                           | gca             |
|--------------|----------------------------------------|-------------------------|------|--------------|---------------------|----------------------------------------------------|--------------------------------------------------------------------------------------------------|-----------------|
| EFE7435055.1 | HetE-N1→ TPR+GreAB-C+PIN*→             | TPR+GreAB-C+PIN         | 917  | F9S89_16525  | Gammaproteobacteria | Escherichia coli                                   | hypothetical protein F9S89_16525, partial [Escherichia coli].                                    | GCA_012452135.1 |
| EFE7908555.1 | TPR+GreAB-C+PIN*→                      | TPR+GreAB-C+PIN         | 1007 | F3644_26165  | Gammaproteobacteria | Escherichia coli                                   | hypothetical protein F3644_26165, partial [Escherichia coli].                                    | GCA_012454005.1 |
| EFF2139424.1 | TPR+GreAB-C+PIN*→                      | TPR+GreAB-C+PIN         | 639  | B9T00_004906 | Gammaproteobacteria | Escherichia coli                                   | hypothetical protein B9T00_004906, partial [Escherichia coli].                                   | GCA_012475085.1 |
| EFG3018646.1 | TPR+GreAB-C+PIN*→                      | TPR+GreAB-C+PIN         | 644  | BOZ88_000259 | Gammaproteobacteria | Escherichia coli                                   | hypothetical protein BOZ88_000259, partial [Escherichia coli].                                   | GCA_012551215.1 |
| EFG6909290.1 | HetE-N1→ TPR+GreAB-C+PIN*→             | TPR+GreAB-C+PIN         | 747  | BMM73_004701 | Gammaproteobacteria | Escherichia coli                                   | hypothetical protein BMM73_004701, partial [Escherichia coli].                                   | GCA_012567505.1 |
| EFH5729117.1 | GreAB-C*→                              | GreAB-C                 | 499  | GPH08_24725  | Gammaproteobacteria | Escherichia coli                                   | hypothetical protein GPH08_24725, partial [Escherichia coli].                                    | GCA_012607235.1 |
| EFK2051151.1 | HetE-N1→ TPR+GreAB-C+PIN*→             | TPR+GreAB-C+PIN         | 1094 | A8650_000222 | Gammaproteobacteria | Escherichia coli                                   | hypothetical protein A8650_000222 [Escherichia coli].                                            | GCA_012745335.1 |
| EFK2630094.1 | HetE-N1→ TPR+GreAB-C+PIN*→             | TPR+GreAB-C+PIN         | 1094 | A8611_000403 | Gammaproteobacteria | Escherichia coli                                   | hypothetical protein A8611_000403 [Escherichia coli].                                            | GCA_012750705.1 |
| EFK4277858.1 | HetE-N1→ TPR+GreAB-C+PIN*→             | TPR+GreAB-C+PIN         | 1094 | A8W36_000742 | Gammaproteobacteria | Escherichia coli                                   | hypothetical protein A8W36_000742 [Escherichia coli].                                            | GCA_012757595.1 |
| EFK5336626.1 | GreAB-C*→                              | GreAB-C                 | 296  | G5Y50_005070 | Gammaproteobacteria | Escherichia coli                                   | hypothetical protein G5Y50_005070, partial [Escherichia coli].                                   | GCA_012762195.1 |
| EFM2410662.1 | TPR+GreAB-C+PIN*→                      | TPR+GreAB-C+PIN         | 1064 | HCP88_003534 | Gammaproteobacteria | Escherichia coli                                   | hypothetical protein HCP88_003534, partial [Escherichia coli].                                   | GCA_012855135.1 |
| EFM6245585.1 | HetE-N1→ TPR+GreAB-C+PIN*→             | TPR+GreAB-C+PIN         | 1094 | G8G69_000691 | Gammaproteobacteria | Escherichia coli                                   | hypothetical protein G8G69_000691 [Escherichia coli].                                            | GCA_012890895.1 |
| EFN7425919.1 | HetE-N1→ HetE-N1+TPR+GreAB-C+PIN*→     | HetE-N1+TPR+GreAB-C+PIN | 1094 | EHR20_13780  | Gammaproteobacteria | Escherichia coli                                   | hypothetical protein EHR20_13780 [Escherichia coli].                                             | GCA_013040925.1 |
| EFO0890621.1 | GreAB-C*→                              | GreAB-C                 | 328  | DYJ49_27190  | Gammaproteobacteria | Escherichia coli                                   | hypothetical protein DYJ49_27190, partial [Escherichia coli].                                    | GCA_013061045.1 |
| EFO1176558.1 | TPR+GreAB-C+PIN*→                      | TPR+GreAB-C+PIN         | 1073 | DW520_17505  | Gammaproteobacteria | Escherichia coli                                   | hypothetical protein DW520_17505, partial [Escherichia coli].                                    | GCA_013062025.1 |
| EFS2240967.1 | HetE-N1→ TPR+GreAB-C+PIN*→             | TPR+GreAB-C+PIN         | 1094 | GTJ56_01995  | Gammaproteobacteria | Shigella sonnei                                    | hypothetical protein GTJ56_01995 [Shigella sonnei].                                              | GCA_013627075.1 |
| EFT8083545.1 | <-HTH<-PSE  HetE-N1→ TPR+GreAB-C+PIN*→ | TPR+GreAB-C+PIN         | 1107 | HVC06_002423 | Gammaproteobacteria | Salmonella enterica                                | hypothetical protein HVC06_002423 [Salmonella enterica].                                         | GCA_013717865.1 |
| EFU7164914.1 | TPR+GreAB-C+PIN*→                      | TPR+GreAB-C+PIN         | 1012 | HTZ39_004610 | Gammaproteobacteria | Escherichia coli                                   | hypothetical protein HTZ39_004610, partial [Escherichia coli].                                   | GCA_013766175.1 |
| EFW2864166.1 | TPR+GreAB-C*→                          | TPR+GreAB-C             | 440  | H3T30_004508 | Gammaproteobacteria | Salmonella enterica                                | hypothetical protein H3T30_004508, partial [Salmonella enterica].                                | GCA_013859415.1 |
| EFZ7349264.1 | HetE-N1→ TPR+GreAB-C+PIN*→             | TPR+GreAB-C+PIN         | 1094 | A8I24_003489 | Gammaproteobacteria | Shigella sonnei                                    | hypothetical protein A8I24_003489 [Shigella sonnei].                                             | GCA_014033075.1 |
| EGB9339943.1 | TPR+GreAB-C+PIN*→                      | TPR+GreAB-C+PIN         | 694  | H8Q22_004544 | Gammaproteobacteria | Salmonella enterica                                | hypothetical protein H8Q22_004544, partial [Salmonella enterica].                                | GCA_014249275.1 |
| EGF6340579.1 | GreAB-C*→                              | GreAB-C                 | 417  | IBT07_004591 | Gammaproteobacteria | Salmonella enterica subsp. enterica serovar Molade | hypothetical protein IBT07_004591, partial [Salmonella enterica subsp. enterica serovar Molade]. | GCA_014515725.1 |
| EGG4494193.1 | TPR+GreAB-C+PIN*→                      | TPR+GreAB-C+PIN         | 990  | HKL61_004648 | Gammaproteobacteria | Salmonella enterica                                | hypothetical protein HKL61_004648, partial [Salmonella enterica].                                | GCA_014566815.1 |
| EGG4638401.1 | HetE-N1→ TPR+GreAB-C+PIN*→             | TPR+GreAB-C+PIN         | 777  | HKL37_003624 | Gammaproteobacteria | Salmonella enterica                                | hypothetical protein HKL37_003624, partial [Salmonella enterica].                                | GCA_014566995.1 |
| EGG4725781.1 | HetE-N1→ TPR+GreAB-C+PIN*→             | TPR+GreAB-C+PIN         | 855  | HKE56_003805 | Gammaproteobacteria | Salmonella enterica                                | hypothetical protein HKE56_003805, partial [Salmonella enterica].                                | GCA_014566275.1 |

| acc          | operon                                  | architecture            | len  | gen.name     | taxend              | species                                                  | define                                                                                                | gca             |
|--------------|-----------------------------------------|-------------------------|------|--------------|---------------------|----------------------------------------------------------|-------------------------------------------------------------------------------------------------------|-----------------|
| EGI5600308.1 | HetE-N1→ TPR+GreAB-C+PIN*→              | TPR+GreAB-C+PIN         | 1070 | VS45_000308  | Gammaproteobacteria | Salmonella enterica subsp. enterica serovar Augustenborg | hypothetical protein VS45_000308, partial [Salmonella enterica subsp. enterica serovar Augustenborg]. | GCA_014756925.1 |
| EGI6298009.1 | HetE-N1→ TPR+GreAB-C+PIN*→              | TPR+GreAB-C+PIN         | 1117 | WB72_004704  | Gammaproteobacteria | Salmonella enterica subsp. enterica serovar Molade       | hypothetical protein WB72_004704 [Salmonella enterica subsp. enterica serovar Molade].                | GCA_014759725.1 |
| EGJ1631486.1 | <-HTH<-?<-?  HetE-N1→ TPR+GreAB-C+PIN*→ | TPR+GreAB-C+PIN         | 915  | IHG43_004265 | Gammaproteobacteria | Salmonella enterica                                      | hypothetical protein IHG43_004265, partial [Salmonella enterica].                                     | GCA_014806485.1 |
| EGJ1647992.1 | <-HTH<-?<-?  HetE-N1→ TPR+GreAB-C+PIN*→ | TPR+GreAB-C+PIN         | 1107 | IHG42_002561 | Gammaproteobacteria | Salmonella enterica                                      | hypothetical protein IHG42_002561 [Salmonella enterica].                                              | GCA_014806725.1 |
| EGK4803692.1 | TPR+GreAB-C+PIN*→                       | TPR+GreAB-C+PIN         | 879  | IOX27_004405 | Gammaproteobacteria | Salmonella enterica                                      | hypothetical protein IOX27_004405, partial [Salmonella enterica].                                     | GCA_014937925.1 |
| EGQ7796229.1 | HetE-N1→ TPR+GreAB-C+PIN*→              | TPR+GreAB-C+PIN         | 1130 | I6Z01_004778 | Gammaproteobacteria | Vibrio parahaemolyticus                                  | hypothetical protein I6Z01_004778 [Vibrio parahaemolyticus].                                          | GCA_015745865.1 |
| EGQ8097028.1 | TPR+GreAB-C+PIN*→                       | TPR+GreAB-C+PIN         | 450  | G4T96_003617 | Gammaproteobacteria | Vibrio cholerae                                          | hypothetical protein G4T96_003617, partial [Vibrio cholerae].                                         | GCA_015960365.1 |
| EGQ8394401.1 | HetE-N1→ TPR+GreAB-C+PIN*→              | TPR+GreAB-C+PIN         | 1089 | GTW12_14360  | Gammaproteobacteria | Vibrio cholerae                                          | hypothetical protein GTW12_14360 [Vibrio cholerae].                                                   | GCA_015775695.1 |
| EGR2511155.1 | HetE-N1→ HetE-N1+TPR+GreAB-C+PIN*→      | HetE-N1+TPR+GreAB-C+PIN | 1088 | DYC71_07390  | Gammaproteobacteria | Vibrio cholerae                                          | hypothetical protein DYC71_07390 [Vibrio cholerae].                                                   | GCA_015803535.1 |
| EGR2571797.1 | HetE-N1→ TPR+GreAB-C+PIN*→              | TPR+GreAB-C+PIN         | 1089 | DXI14_15890  | Gammaproteobacteria | Vibrio cholerae                                          | hypothetical protein DXI14_15890 [Vibrio cholerae].                                                   | GCA_015804695.1 |
| EGR4199274.1 | HetE-N1→ HetE-N1+TPR+GreAB-C+PIN*→      | HetE-N1+TPR+GreAB-C+PIN | 1088 | DDN79_15180  | Gammaproteobacteria | Vibrio cholerae                                          | hypothetical protein DDN79_15180 [Vibrio cholerae].                                                   | GCA_015810035.1 |
| EGR4999920.1 | HetE-N1→ HetE-N1+TPR+GreAB-C+PIN*→      | HetE-N1+TPR+GreAB-C+PIN | 1091 | C4G32_21475  | Gammaproteobacteria | Vibrio parahaemolyticus                                  | hypothetical protein C4G32_21475 [Vibrio parahaemolyticus].                                           | GCA_015814505.1 |
| EGS2470077.1 | HetE-N1→ TPR+GreAB-C+PIN*→              | TPR+GreAB-C+PIN         | 1117 | I8K59_003334 | Gammaproteobacteria | Salmonella enterica                                      | hypothetical protein I8K59_003334 [Salmonella enterica].                                              | GCA_015867645.1 |
| EGS6048781.1 | HetE-N1→ TPR+GreAB-C+PIN*→              | TPR+GreAB-C+PIN         | 998  | I4Y87_004789 | Gammaproteobacteria | Salmonella enterica subsp. enterica serovar Alachua      | hypothetical protein I4Y87_004789, partial [Salmonella enterica subsp. enterica serovar Alachua].     | GCA_015906765.1 |
| EGT0637485.1 | GreAB-C*→                               | GreAB-C                 | 478  | JAG24_004773 | Gammaproteobacteria | Citrobacter freundii                                     | hypothetical protein JAG24_004773, partial [Citrobacter freundii].                                    | GCA_015943305.1 |
| EGT3640898.1 | TPR+GreAB-C+PIN*→                       | TPR+GreAB-C+PIN         | 1067 | DFW15_03700  | Firmicutes          | Clostridioides difficile                                 | hypothetical protein DFW15_03700 [Clostridioides difficile].                                          | GCA_016071215.1 |
| EGT5618809.1 | TPR+GreAB-C+PIN*→                       | TPR+GreAB-C+PIN         | 1233 | BUL45_06960  | Firmicutes          | Clostridium perfringens                                  | tetratricopeptide repeat protein [Clostridium perfringens].                                           | GCA_016085335.1 |
| EGY6095294.1 | REase+TPR+GreAB-C+PIN*→   <-?  HTH→     | REase+TPR+GreAB-C+PIN   | 1216 | A1Z38_19500  | Gammaproteobacteria | Acinetobacter baumannii                                  | hypothetical protein A1Z38_19500 [Acinetobacter baumannii].                                           | GCA_016522135.1 |
| EGY8392823.1 | REase+TPR+GreAB-C+PIN*→   <-?  HTH→     | REase+TPR+GreAB-C+PIN   | 1216 | AXE44_13945  | Gammaproteobacteria | Acinetobacter baumannii                                  | hypothetical protein AXE44_13945 [Acinetobacter baumannii].                                           | GCA_016539145.1 |
| EHA1126835.1 | HetE-N1→ TPR+GreAB-C+PIN*→              | TPR+GreAB-C+PIN         | 1114 | FG475_17175  | Gammaproteobacteria | Vibrio navarrensis                                       | hypothetical protein FG475_17175 [Vibrio navarrensis].                                                | GCA_016611225.1 |
| EHB5819355.1 | HetE-N1→ TPR+GreAB-C+PIN*→              | TPR+GreAB-C+PIN         | 1106 | JXL86_002072 | -                   | Enterobacter hormaechei                                  | hypothetical protein JXL86_002072 [Enterobacter hormaechei].                                          | GCA_016985635.1 |
| EHB7585965.1 | HetE-N1→ TPR+GreAB-C+PIN*→              | TPR+GreAB-C+PIN         | 759  | JV429_000621 | Gammaproteobacteria | Escherichia coli                                         | hypothetical protein JV429_000621, partial [Escherichia coli].                                        | GCA_017003995.1 |
| EHB7691780.1 | TPR+GreAB-C+PIN*→                       | TPR+GreAB-C+PIN         | 745  | JV466_004427 | Gammaproteobacteria | Escherichia coli                                         | hypothetical protein JV466_004427, partial [Escherichia coli].                                        | GCA_017004675.1 |
| EHC1615065.1 | TPR+GreAB-C+PIN*→                       | TPR+GreAB-C+PIN         | 732  | JT622_005238 | Gammaproteobacteria | Escherichia coli                                         | hypothetical protein JT622_005238, partial [Escherichia coli].                                        | GCA_017029715.1 |
| EHD4655635.1 | HetE-N1→ TPR+GreAB-C+PIN*→              | TPR+GreAB-C+PIN         | 807  | JRB69_003203 | Gammaproteobacteria | Salmonella enterica                                      | hypothetical protein JRB69_003203, partial [Salmonella enterica].                                     | GCA_017143955.1 |

| acc          | operon                                    | architecture            | len  | gen.name     | taxend              | species                                               | define                                                                                              | gca             |
|--------------|-------------------------------------------|-------------------------|------|--------------|---------------------|-------------------------------------------------------|-----------------------------------------------------------------------------------------------------|-----------------|
| EHD4703897.1 | GreAB-C*→                                 | GreAB-C                 | 419  | JRB68_004676 | Gammaproteobacteria | Salmonella enterica                                   | hypothetical protein JRB68_004676, partial [Salmonella enterica].                                   | GCA_017144295.1 |
| EHD5811550.1 | TPR+GreAB-C+PIN*→                         | TPR+GreAB-C+PIN         | 628  | JQZ13_004415 | Gammaproteobacteria | Escherichia coli                                      | hypothetical protein JQZ13_004415, partial [Escherichia coli].                                      | GCA_017158335.1 |
| EHD6029608.1 | HetE-N1→ TPR+GreAB-C+PIN*→                | TPR+GreAB-C+PIN         | 1085 | JQ325_002365 | Gammaproteobacteria | Vibrio parahaemolyticus                               | hypothetical protein JQ325_002365 [Vibrio parahaemolyticus].                                        | GCA_017160295.1 |
| EHF0016324.1 | ?*→                                       | ?                       | 690  | IFX66_005031 | Gammaproteobacteria | Escherichia coli                                      | hypothetical protein IFX66_005031, partial [Escherichia coli].                                      | GCA_017278275.1 |
| EHG1523212.1 | TPR+GreAB-C+PIN*→                         | TPR+GreAB-C+PIN         | 1001 | J1L78_003684 | Gammaproteobacteria | Salmonella enterica subsp. enterica serovar Corvallis | hypothetical protein J1L78_003684, partial [Salmonella enterica subsp. enterica serovar Corvallis]. | GCA_017373035.1 |
| EHG6154572.1 | HetE-N1→ TPR+GreAB-C+PIN*→                | TPR+GreAB-C+PIN         | 1094 | J5T29_002362 | Gammaproteobacteria | Escherichia fergusonii                                | hypothetical protein J5T29_002362 [Escherichia fergusonii].                                         | GCA_017528445.1 |
| EHG8446233.1 | HetE-N1→ TPR+GreAB-C+PIN*→                | TPR+GreAB-C+PIN         | 1106 | J6D68_002379 | Gammaproteobacteria | Salmonella enterica subsp. enterica                   | hypothetical protein J6D68_002379 [Salmonella enterica subsp. enterica].                            | GCA_017573985.1 |
| EHH5222655.1 | TPR+GreAB-C+PIN*→                         | TPR+GreAB-C+PIN         | 630  | J6876_004216 | Gammaproteobacteria | Escherichia coli                                      | hypothetical protein J6876_004216, partial [Escherichia coli].                                      | GCA_017685995.1 |
| EHH5972888.1 | TPR+GreAB-C+PIN*→                         | TPR+GreAB-C+PIN         | 1039 | J8O14_004858 | Gammaproteobacteria | Salmonella enterica subsp. enterica serovar Alachua   | hypothetical protein J8O14_004858, partial [Salmonella enterica subsp. enterica serovar Alachua].   | GCA_017690295.1 |
| EHH6676921.1 | HetE-N1→ TPR+GreAB-C+PIN*→                | TPR+GreAB-C+PIN         | 1094 | J6H48_001187 | Gammaproteobacteria | Escherichia coli                                      | hypothetical protein J6H48_001187 [Escherichia coli].                                               | GCA_017723775.1 |
| EHH7564006.1 | TPR+GreAB-C+PIN*→                         | TPR+GreAB-C+PIN         | 1015 | J5J30_004554 | Gammaproteobacteria | Escherichia coli                                      | hypothetical protein J5J30_004554, partial [Escherichia coli].                                      | GCA_017727775.1 |
| EHH7810630.1 | GreAB-C*→                                 | GreAB-C                 | 318  | J5B41_005221 | Gammaproteobacteria | Escherichia coli                                      | hypothetical protein J5B41_005221, partial [Escherichia coli].                                      | GCA_017733975.1 |
| EHI0937798.1 | TPR+GreAB-C+PIN*→                         | TPR+GreAB-C+PIN         | 636  | J1A00_004749 | Gammaproteobacteria | Escherichia coli                                      | hypothetical protein J1A00_004749, partial [Escherichia coli].                                      | GCA_017780845.1 |
| EHI2008363.1 | TPR+GreAB-C+PIN*→                         | TPR+GreAB-C+PIN         | 694  | J9U59_004724 | Gammaproteobacteria | Salmonella enterica                                   | hypothetical protein J9U59_004724, partial [Salmonella enterica].                                   | GCA_017791685.1 |
| EHI3384480.1 | TPR+GreAB-C+PIN*→                         | TPR+GreAB-C+PIN         | 747  | J9U04_004755 | Gammaproteobacteria | Salmonella enterica                                   | hypothetical protein J9U04_004755, partial [Salmonella enterica].                                   | GCA_017798465.1 |
| EHI3712656.1 | TPR+GreAB-C+PIN*→                         | TPR+GreAB-C+PIN         | 723  | J9T76_004561 | Gammaproteobacteria | Salmonella enterica                                   | hypothetical protein J9T76_004561, partial [Salmonella enterica].                                   | GCA_017800075.1 |
| EHI5184709.1 | TPR+GreAB-C+PIN*→                         | TPR+GreAB-C+PIN         | 999  | J9014_004542 | Gammaproteobacteria | Salmonella enterica                                   | hypothetical protein J9014_004542, partial [Salmonella enterica].                                   | GCA_017806615.1 |
| EHI6070991.1 | HetE-N1→ TPR+GreAB-C+PIN*→                | TPR+GreAB-C+PIN         | 984  | J9J70_003931 | Gammaproteobacteria | Salmonella enterica                                   | hypothetical protein J9J70_003931, partial [Salmonella enterica].                                   | GCA_017810795.1 |
| EHI8244355.1 | HetE-N1→ TPR+GreAB-C+PIN*→                | TPR+GreAB-C+PIN         | 784  | J9M94_004032 | Gammaproteobacteria | Salmonella enterica                                   | hypothetical protein J9M94_004032, partial [Salmonella enterica].                                   | GCA_017828575.1 |
| EHI9713257.1 | TPR+GreAB-C+PIN*→                         | TPR+GreAB-C+PIN         | 735  | J9T07_004736 | Gammaproteobacteria | Salmonella enterica                                   | hypothetical protein J9T07_004736, partial [Salmonella enterica].                                   | GCA_017836875.1 |
| EHJ6284301.1 | <-HTH<-?<-PSE  HetE-N1→ TPR+GreAB-C+PIN*→ | TPR+GreAB-C+PIN         | 1106 | KAM53_001182 | Gammaproteobacteria | Salmonella enterica                                   | hypothetical protein KAM53_001182 [Salmonella enterica].                                            | GCA_017922215.1 |
| EHJ8153220.1 | TPR+GreAB-C+PIN*→                         | TPR+GreAB-C+PIN         | 707  | KB264_004740 | Gammaproteobacteria | Escherichia coli                                      | hypothetical protein KB264_004740, partial [Escherichia coli].                                      | GCA_017943665.1 |
| EHJ9993052.1 | HetE-N1→ TPR+GreAB-C+PIN*→                | TPR+GreAB-C+PIN         | 1085 | KB972_002278 | Gammaproteobacteria | Vibrio parahaemolyticus                               | hypothetical protein KB972_002278 [Vibrio parahaemolyticus].                                        | GCA_017968025.1 |
| EHK2882579.1 | HetE-N1→ HetE-N1+TPR+GreAB-C+PIN*→        | HetE-N1+TPR+GreAB-C+PIN | 1091 | J7H88_002175 | Gammaproteobacteria | Vibrio parahaemolyticus                               | hypothetical protein J7H88_002175 [Vibrio parahaemolyticus].                                        | GCA_018017275.1 |
| EHL5831134.1 | HetE-N1→ TPR+GreAB-C+PIN*→                | TPR+GreAB-C+PIN         | 1117 | KEB97_001561 | Gammaproteobacteria | Salmonella enterica                                   | hypothetical protein KEB97_001561 [Salmonella enterica].                                            | GCA_018132225.1 |

| acc        | operon                                                               | architecture            | len  | gen.name          | taxend                | species                                        | define                                                                                 | gca             |
|------------|----------------------------------------------------------------------|-------------------------|------|-------------------|-----------------------|------------------------------------------------|----------------------------------------------------------------------------------------|-----------------|
| EKD28835.1 | TPR+GreAB-C+PIN*→                                                    | TPR+GreAB-C+PIN         | 1282 | ACD_79C00188G0006 | environmental samples | uncultured bacterium                           | MAG: hypothetical protein ACD_79C00188G0006 [uncultured bacterium].                    | GCA_000299275.1 |
| EKM26807.1 | HetE-N1→ TPR+GreAB-C+PIN*→                                           | TPR+GreAB-C+PIN         | 1091 | VCHENC03_4410     | Gammaproteobacteria   | Vibrio sp. HENC-03                             | hypothetical protein VCHENC03_4410 [Vibrio sp. HENC-03].                               | GCA_000305755.2 |
| ENE18425.1 | GreAB-C*→                                                            | GreAB-C                 | 334  | ECP03047993_5652  | Gammaproteobacteria   | Escherichia coli P0304799.3                    | hypothetical protein ECP03047993_5652, partial [Escherichia coli P0304799.3].          | GCA_000357685.2 |
| ENV19736.1 | HetE-N1→?→?→ GreAB-C+PIN*→                                           | GreAB-C+PIN             | 553  | F963_04374        | Gammaproteobacteria   | Acinetobacter bereziniae NIPH 3                | hypothetical protein F963_04374 [Acinetobacter bereziniae NIPH 3].                     | GCA_000368505.1 |
| EOS47428.1 | HNH→?→?→ TPR+GreAB-C+PIN*→                                           | TPR+GreAB-C+PIN         | 1071 | C809_02304        | Firmicutes            | Lachnospiraceae bacterium MD335                | hypothetical protein C809_02304 [Lachnospiraceae bacterium MD335].                     | GCA_000403335.2 |
| ERS81691.1 | TPR+GreAB-C+PIN*→                                                    | TPR+GreAB-C+PIN         | 480  | Q672_10295        | Gammaproteobacteria   | Marinobacter sp. EVN1                          | hypothetical protein Q672_10295 [Marinobacter sp. EVN1].                               | GCA_000475375.1 |
| ERU60319.1 | DOC+HTH→ REase+TOPC→?→ HetE-N1→ HetE-N1+TPR+GreAB-C+PIN*→            | HetE-N1+TPR+GreAB-C+PIN | 1126 | Q088_04776        | Gammaproteobacteria   | Pseudomonas aeruginosa C41                     | hypothetical protein Q088_04776 [Pseudomonas aeruginosa C41].                          | GCA_000480455.1 |
| ETK41841.1 | REase+TPR+GreAB-C+PIN*→                                              | REase+TPR+GreAB-C+PIN   | 1486 | H098_09645        | Gammaproteobacteria   | Pseudomonas fluorescens FH5                    | hypothetical protein H098_09645 [Pseudomonas fluorescens FH5].                         | GCA_000511155.2 |
| EWS54147.1 | REase+TPR→ TPR+GreAB-C+PIN*→                                         | TPR+GreAB-C+PIN         | 1054 | X551_03051        | Betaproteobacteria    | Methylibium sp. T29                            | hypothetical protein X551_03051 [Methylibium sp. T29].                                 | GCA_000576205.1 |
| EXI84113.1 | REase+TPR+GreAB-C+PIN*→                                              | REase+TPR+GreAB-C+PIN   | 1363 | AW11_03978        | Betaproteobacteria    | Candidatus Accumulibacter sp. BA-93            | MAG: hypothetical protein AW11_03978 [Candidatus Accumulibacter sp. BA-93].            | GCA_000585075.1 |
| EXU80592.1 | REase+TPR+GreAB-C+PIN*→                                              | REase+TPR+GreAB-C+PIN   | 1391 | AX13_15135        | Betaproteobacteria    | Comamonas aquatica DA1877                      | hypothetical protein AX13_15135 [Comamonas aquatica DA1877].                           | GCA_000590985.1 |
| GAC55419.1 | TPR+PIN*→                                                            | TPR+PIN                 | 1183 | GOAMI_53_00020    | Actinobacteria        | Gordonia amicalis NBRC 100051 = JCM 11271      | hypothetical protein GOAMI_53_00020 [Gordonia amicalis NBRC 100051 = JCM 11271].       | GCA_000332995.1 |
| GAF05793.1 | TPR+GreAB-C+PIN*→                                                    | TPR+GreAB-C+PIN         | 524  | JCM21142_104546   | Bacteroidetes         | Saccharicrinis fermentans DSM 9555 = JCM 21142 | hypothetical protein JCM21142_104546 [Saccharicrinis fermentans DSM 9555 = JCM 21142]. | GCA_000583675.1 |
| GBF59066.1 | REase+TPR+GreAB-C+PIN*→                                              | REase+TPR+GreAB-C+PIN   | 1327 | bepA_7            | Alphaproteobacteria   | Candidatus Phycosocius bacilliformis           | beta-barrel assembly-enhancing protease [Candidatus Phycosocius bacilliformis].        | GCA_003112735.1 |
| GBH08795.1 | HetE-N1→   <-?  HetE-N1+TPR+GreAB-C+PIN→   <-?<-?  TPR+GreAB-C+PIN*→ | TPR+GreAB-C+PIN         | 953  | KPSA1_02176       | Gammaproteobacteria   | Pseudomonas syringae pv. actinidiae            | ATP-dependent exoDNase beta subunit [Pseudomonas syringae pv. actinidiae].             | GCA_003202975.1 |
| GBH17945.1 | REase+TPR+GreAB-C+PIN*→?→ REase+nSTAND3→ REase+nSTAND3→              | REase+TPR+GreAB-C+PIN   | 1491 | KPSA3_03922       | Gammaproteobacteria   | Pseudomonas syringae pv. actinidiae            | Tetratricopeptide repeat [Pseudomonas syringae pv. actinidiae].                        | GCA_003202995.1 |
| GBU16512.1 | TPR+GreAB-C+PIN*→                                                    | TPR+GreAB-C+PIN         | 1107 | AwMethylo_07270   | Alphaproteobacteria   | Methylobacterium sp.                           | hypothetical protein AwMethylo_07270 [Methylobacterium sp.].                           | GCA_003864615.1 |
| GCL65539.1 | REase+TPR+GreAB-C+PIN*→                                              | REase+TPR+GreAB-C+PIN   | 1455 | AQPW35_46200      | Betaproteobacteria    | Aquabacterium pictum                           | hypothetical protein AQPW35_46200 [Aquabacterium pictum].                              | GCA_005403045.1 |
| GCM29814.1 | TPR+GreAB-C+PIN*→                                                    | TPR+GreAB-C+PIN         | 622  | ExPECSC050_01644  | Gammaproteobacteria   | Escherichia coli                               | hypothetical protein ExPECSC050_01644 [Escherichia coli].                              | GCA_005383045.1 |
| GFJ77328.1 | TM+TPR+PIN*→ REase→                                                  | TM+TPR+PIN              | 1362 | Phou_015080       | Actinobacteria        | Phytohabitans houttuyniae                      | hypothetical protein Phou_015080 [Phytohabitans houttuyniae].                          | GCA_011764425.1 |
| GGJ71040.1 | TPR+PIN*→                                                            | TPR+PIN                 | 1223 | GCM10012282_79870 | Actinobacteria        | Streptomyces lacrimifluminis                   | hypothetical protein GCM10012282_79870 [Streptomyces lacrimifluminis].                 | GCA_014646095.1 |
| GGK48292.1 | HetE-N1→ TPR+GreAB-C+PIN*→                                           | TPR+GreAB-C+PIN         | 1120 | GCM10009103_48460 | Gammaproteobacteria   | Pseudomonas koreensis                          | hypothetical protein GCM10009103_48460 [Pseudomonas koreensis].                        | GCA_014646955.1 |
| GGR17482.1 | REase+TPR+GreAB-C+PIN*→                                              | REase+TPR+GreAB-C+PIN   | 1357 | GCM10008957_32760 | Deinococci            | Deinococcus ruber                              | hypothetical protein GCM10008957_32760 [Deinococcus ruber].                            | GCA_014648095.1 |
| GGZ02836.1 | HetE-N1→?→ GreAB-C*→                                                 | GreAB-C                 | 451  | GCM10007169_19550 | Gammaproteobacteria   | Shewanella fodinae                             | hypothetical protein GCM10007169_19550 [Shewanella fodinae].                           | GCA_014651955.1 |
| GHB08256.1 | HetE-N1→ TPR+GreAB-C+PIN*→                                           | TPR+GreAB-C+PIN         | 1025 | GCM10007107_21780 | Gammaproteobacteria   | Shewanella indica                              | hypothetical protein GCM10007107_21780 [Shewanella indica].                            | GCA_014652115.1 |

| acc          | operon                                        | architecture            | len  | gen.name         | taxend              | species                     | define                                                                  | gca             |
|--------------|-----------------------------------------------|-------------------------|------|------------------|---------------------|-----------------------------|-------------------------------------------------------------------------|-----------------|
| GIE51569.1   | TPR+PIN→?→?→ PIN*→    <-?<-? AbiJ-NTD3+REase→ | PIN                     | 177  | Ani05nite_51030  | Actinobacteria      | Actinoplanes nipponensis    | hypothetical protein Ani05nite_51030 [Actinoplanes nipponensis].        | GCA_016862275.1 |
| GIG67348.1   | TM+TPR+PIN*→                                  | TM+TPR+PIN              | 1072 | Pen01_36430      | Actinobacteria      | Phytomonospora endophytica  | hypothetical protein Pen01_36430 [Phytomonospora endophytica].          | GCA_016862855.1 |
| GIJ10564.1   | REase+TPR+GreAB-C+PIN*→                       | REase+TPR+GreAB-C+PIN   | 1377 | Van01_37780      | Actinobacteria      | Micromonospora andamanensis | hypothetical protein Van01_37780 [Micromonospora andamanensis].         | GCA_016863495.1 |
| GIM80122.1   | REase+TPR+GreAB-C+PIN*→                       | REase+TPR+GreAB-C+PIN   | 1253 | Aau02nite_89080  | Actinobacteria      | Actinoplanes auranticolor   | hypothetical protein Aau02nite_89080 [Actinoplanes auranticolor].       | GCA_018332655.1 |
| GIM97804.1   | TPR+PIN*→                                     | TPR+PIN                 | 1137 | Ato02nite_095970 | Actinobacteria      | Actinoplanes toevensis      | hypothetical protein Ato02nite_095970 [Actinoplanes toevensis].         | GCA_018332695.1 |
| HAF5476147.1 | HetE-N1→ TPR+GreAB-C+PIN*→                    | TPR+GreAB-C+PIN         | 1117 | G8A91_001303     | Gammaproteobacteria | Salmonella enterica         | TPA: hypothetical protein G8A91_001303 [Salmonella enterica].           | GCA_011304215.1 |
| HAH9826030.1 | HetE-N1→ TPR+GreAB-C+PIN*→                    | TPR+GreAB-C+PIN         | 986  | HIF24_22945      | Gammaproteobacteria | Escherichia coli            | TPA: hypothetical protein HIF24_22945, partial [Escherichia coli].      | GCA_012753875.1 |
| HAK4911912.1 | HetE-N1→ TPR+GreAB-C+PIN*→                    | TPR+GreAB-C+PIN         | 1117 | H2B38_003821     | Gammaproteobacteria | Salmonella enterica         | TPA: hypothetical protein H2B38_003821 [Salmonella enterica].           | GCA_013572415.1 |
| HAK9873068.1 | TPR+GreAB-C+PIN*→                             | TPR+GreAB-C+PIN         | 1028 | H3L74_004566     | Gammaproteobacteria | Escherichia coli            | TPA: hypothetical protein H3L74_004566, partial [Escherichia coli].     | GCA_013794255.1 |
| HAL9130497.1 | HetE-N1→ TPR+GreAB-C+PIN*→                    | TPR+GreAB-C+PIN         | 1094 | H7U58_003240     | Gammaproteobacteria | Escherichia coli            | TPA: hypothetical protein H7U58_003240 [Escherichia coli].              | GCA_014184975.1 |
| HAL9453557.1 | GreAB-C*→                                     | GreAB-C                 | 337  | H7V29_005028     | Gammaproteobacteria | Escherichia coli            | TPA: hypothetical protein H7V29_005028, partial [Escherichia coli].     | GCA_014186535.1 |
| HAM4053647.1 | HetE-N1→ TPR+GreAB-C+PIN*→                    | TPR+GreAB-C+PIN         | 1094 | IBV36_002404     | Gammaproteobacteria | Escherichia coli            | TPA: hypothetical protein IBV36_002404 [Escherichia coli].              | GCA_014461175.1 |
| HAM8943229.1 | HetE-N1→ TPR+GreAB-C+PIN*→                    | TPR+GreAB-C+PIN         | 618  | IDX96_004717     | Gammaproteobacteria | Escherichia coli            | TPA: hypothetical protein IDX96_004717, partial [Escherichia coli].     | GCA_014571125.1 |
| HAM8943373.1 | TPR+GreAB-C+PIN*→                             | TPR+GreAB-C+PIN         | 474  | IDX96_004882     | Gammaproteobacteria | Escherichia coli            | TPA: hypothetical protein IDX96_004882, partial [Escherichia coli].     | GCA_014571125.1 |
| HAM8966916.1 | HetE-N1→ TPR+GreAB-C+PIN*→                    | TPR+GreAB-C+PIN         | 1094 | IDX85_003830     | Gammaproteobacteria | Escherichia coli            | TPA: hypothetical protein IDX85_003830 [Escherichia coli].              | GCA_014573095.1 |
| HAM8991159.1 | HetE-N1→ TPR+GreAB-C+PIN*→                    | TPR+GreAB-C+PIN         | 1094 | IDX80_003853     | Gammaproteobacteria | Escherichia coli            | TPA: hypothetical protein IDX80_003853 [Escherichia coli].              | GCA_014573135.1 |
| HAN3697638.1 | TPR+GreAB-C+PIN*→                             | TPR+GreAB-C+PIN         | 1050 | IE973_004718     | Gammaproteobacteria | Escherichia coli            | TPA: hypothetical protein IE973_004718, partial [Escherichia coli].     | GCA_014687295.1 |
| HAN4834938.1 | HetE-N1→ TPR+GreAB-C+PIN*→                    | TPR+GreAB-C+PIN         | 1094 | IFD90_003495     | Gammaproteobacteria | Escherichia coli            | TPA: hypothetical protein IFD90_003495 [Escherichia coli].              | GCA_014683685.1 |
| HAN6118733.1 | HetE-N1→ TPR+GreAB-C+PIN*→                    | TPR+GreAB-C+PIN         | 1094 | IFZ61_002838     | Gammaproteobacteria | Escherichia coli            | TPA: hypothetical protein IFZ61_002838 [Escherichia coli].              | GCA_014708655.1 |
| HAN7634134.1 | GreAB-C*→                                     | GreAB-C                 | 447  | IF647_005249     | Gammaproteobacteria | Escherichia coli            | TPA: hypothetical protein IF647_005249, partial [Escherichia coli].     | GCA_014724455.1 |
| HAO1938999.1 | HetE-N1→ TPR+GreAB-C+PIN*→                    | TPR+GreAB-C+PIN         | 1094 | IHJ42_000411     | Gammaproteobacteria | Escherichia coli            | TPA: hypothetical protein IHJ42_000411 [Escherichia coli].              | GCA_014815885.1 |
| HAS1413650.1 | TPR+GreAB-C+PIN*→                             | TPR+GreAB-C+PIN         | 845  | I4D28_09180      | Gammaproteobacteria | Enterobacter hormaechei     | TPA: hypothetical protein I4D28_09180 [Enterobacter hormaechei].        | -               |
| HAT2286137.1 | HetE-N1→ TPR+GreAB-C+PIN+TM+TM*→              | TPR+GreAB-C+PIN+TM+TM   | 1106 | I8156_002891     | Gammaproteobacteria | Citrobacter freundii        | TPA: hypothetical protein I8156_002891 [Citrobacter freundii].          | GCA_015897485.1 |
| HAT3687084.1 | HetE-N1→ TPR+GreAB-C+PIN*→                    | TPR+GreAB-C+PIN         | 958  | I8574_002665     | Gammaproteobacteria | Citrobacter freundii        | TPA: hypothetical protein I8574_002665, partial [Citrobacter freundii]. | GCA_015902705.1 |
| HAT3994325.1 | TPR+GreAB-C+PIN*→                             | TPR+GreAB-C+PIN         | 1131 | I9Y74_003743     | Bacteroidetes       | Elizabethkingia anophelis   | TPA: hypothetical protein I9Y74_003743 [Elizabethkingia anophelis].     | GCA_015930145.1 |
| HAT8488811.1 | HetE-N1→ HetE-N1+TPR+GreAB-C+PIN*→            | HetE-N1+TPR+GreAB-C+PIN | 1088 | I7187_21710      | Gammaproteobacteria | Vibrio vulnificus           | TPA: hypothetical protein I7187_21710 [Vibrio vulnificus].              | GCA_015968635.1 |

| acc          | operon                                      | architecture                | len  | gen.name     | taxend                | species                                      | define                                                                                          | gca             |
|--------------|---------------------------------------------|-----------------------------|------|--------------|-----------------------|----------------------------------------------|-------------------------------------------------------------------------------------------------|-----------------|
| HAU8300026.1 | HetE-N1→ TPR+GreAB-C+PIN*→                  | TPR+GreAB-C+PIN             | 1130 | I7159_21955  | Gammaproteobacteria   | Vibrio vulnificus                            | TPA: hypothetical protein I7159_21955 [Vibrio vulnificus].                                      | GCA_016110185.1 |
| HAU9261412.1 | HetE-N1→ TPR+GreAB-C+PIN*→                  | TPR+GreAB-C+PIN             | 1094 | JEX66_004253 | Gammaproteobacteria   | Escherichia coli                             | TPA: hypothetical protein JEX66_004253 [Escherichia coli].                                      | GCA_016116905.1 |
| HAV13598.1   | GreAB*→                                     | GreAB                       | 620  | DCX06_08945  | Verrucomicrobia       | Opirituae bacterium                          | MAG TPA: transcription elongation factor GreAB [Opirituae bacterium].                           | GCA_003485085.1 |
| HAV1378302.1 | HetE-N1→ NACHT+GreAB-C+PIN*→                | NACHT+GreAB-C+PIN           | 1085 | JG804_003376 | Gammaproteobacteria   | Vibrio parahaemolyticus                      | TPA: hypothetical protein JG804_003376 [Vibrio parahaemolyticus].                               | GCA_016429865.1 |
| HAV1873259.1 | TPR+GreAB-C+PIN*→                           | TPR+GreAB-C+PIN             | 742  | JG951_004564 | Gammaproteobacteria   | Enterobacter hormaechei subsp. steigerwaltii | TPA: hypothetical protein JG951_004564, partial [Enterobacter hormaechei subsp. steigerwaltii]. | GCA_016431145.1 |
| HAV7695504.1 | HetE-N1→ TPR+GreAB-C+PIN*→                  | TPR+GreAB-C+PIN             | 1094 | JK751_001166 | Gammaproteobacteria   | Escherichia coli                             | TPA: hypothetical protein JK751_001166 [Escherichia coli].                                      | GCA_016656125.1 |
| HAV9376548.1 | TPR+GreAB-C+PIN*→                           | TPR+GreAB-C+PIN             | 575  | JLF84_000973 | Gammaproteobacteria   | Escherichia coli                             | TPA: hypothetical protein JLF84_000973 [Escherichia coli].                                      | GCA_016665225.1 |
| HAW2926691.1 | HetE-N1→ TPR+GreAB-C+PIN*→                  | TPR+GreAB-C+PIN             | 1094 | JLR28_003506 | Gammaproteobacteria   | Escherichia coli                             | TPA: hypothetical protein JLR28_003506 [Escherichia coli].                                      | GCA_016681635.1 |
| HAW5283885.1 | HetE-N1→ TPR+GreAB-C+PIN*→                  | TPR+GreAB-C+PIN             | 1094 | JLY51_001282 | Gammaproteobacteria   | Escherichia coli                             | TPA: hypothetical protein JLY51_001282 [Escherichia coli].                                      | GCA_016693495.1 |
| HAW6997627.1 | REase+TPR+GreAB-C+PIN*→                     | REase+TPR+GreAB-C+PIN       | 1250 | JIR16_12805  | Gammaproteobacteria   | Acinetobacter baumannii                      | TPA: hypothetical protein JIR16_12805 [Acinetobacter baumannii].                                | GCA_016844125.1 |
| HAY34439.1   | TPR+GreAB-C+PIN*→                           | TPR+GreAB-C+PIN             | 1108 | DCY06_09910  | Bacteroidetes         | Bacteroidetes bacterium                      | MAG TPA: hypothetical protein DCY06_09910 [Bacteroidetes bacterium].                            | GCA_003486905.1 |
| HBA3776861.1 | TPR+GreAB-C+PIN*→                           | TPR+GreAB-C+PIN             | 1117 | J5F89_004850 | Gammaproteobacteria   | Escherichia coli                             | TPA: hypothetical protein J5F89_004850 [Escherichia coli].                                      | GCA_017730375.1 |
| HBC0128974.1 | TPR+GreAB-C+PIN*→                           | TPR+GreAB-C+PIN             | 661  | JES91_004961 | Gammaproteobacteria   | Salmonella enterica subsp. enterica          | TPA: hypothetical protein JES91_004961, partial [Salmonella enterica subsp. enterica].          | GCA_018032925.1 |
| HBC3987585.1 | HetE-N1→ TPR+GreAB-C+PIN*→                  | TPR+GreAB-C+PIN             | 1130 | KD867_004179 | Gammaproteobacteria   | Vibrio parahaemolyticus                      | TPA: hypothetical protein KD867_004179 [Vibrio parahaemolyticus].                               | GCA_018126825.1 |
| HBJ33554.1   | TPR+GreAB-C+PIN*→                           | TPR+GreAB-C+PIN             | 857  | DDZ51_02100  | Planctomycetes        | Planctomycetaceae bacterium                  | MAG TPA: hypothetical protein DDZ51_02100, partial [Planctomycetaceae bacterium].               | GCA_003506095.1 |
| HBX77020.1   | X+PIN*→                                     | X+PIN                       | 940  | DEG43_05200  | Actinobacteria        | Acidimicrobiaceae bacterium                  | MAG TPA: hypothetical protein DEG43_05200 [Acidimicrobiaceae bacterium].                        | GCA_003514205.1 |
| HCD05045.1   | HetE-N1→?→ TPR+GreAB-C+PIN*→   <-REase+UvrD | TPR+GreAB-C+PIN             | 841  | DEQ60_06940  | Gammaproteobacteria   | Methylophaga sp.                             | MAG TPA: hypothetical protein DEQ60_06940, partial [Methylophaga sp.].                          | GCA_003517125.1 |
| HCG03150.1   | REase+TPR+GreAB-C+PIN*→                     | REase+TPR+GreAB-C+PIN       | 1325 | DEV93_21745  | Chloroflexi           | Chloroflexi bacterium                        | MAG TPA: hypothetical protein DEV93_21745 [Chloroflexi bacterium].                              | GCA_003530725.1 |
| HCN10799.1   | HTH→?→?→?→?→?→ TPR+GreAB-C+PIN*→            | TPR+GreAB-C+PIN             | 1128 | DIS75_00410  | Bacteroidetes         | Chryseobacterium sp.                         | MAG TPA: hypothetical protein DIS75_00410 [Chryseobacterium sp.].                               | GCA_003536155.1 |
| HEE61010.1   | GreAB*→                                     | GreAB                       | 217  | ENP71_13075  | Chloroflexi           | Chloroflexi bacterium                        | MAG TPA: transcription elongation factor GreA [Chloroflexi bacterium].                          | GCA_011051445.1 |
| HEN27530.1   | PIN*→                                       | PIN                         | 194  | ENQ77_02470  | Bacteria              | candidate division WOR-3 bacterium           | MAG TPA: RNA ligase partner protein [candidate division WOR-3 bacterium].                       | GCA_011046955.1 |
| HPX16357.1   | REase+TPR+GreAB-C+PIN*→                     | REase+TPR+GreAB-C+PIN       | 1269 | ENW10_10035  | unclassified Bacteria | bacterium                                    | MAG TPA: hypothetical protein ENW10_10035 [bacterium].                                          | GCA_011334465.1 |
| HGB35656.1   | PIN*→                                       | PIN                         | 194  | ENV38_01955  | Bacteria              | candidate division WOR-3 bacterium           | MAG TPA: RNA ligase partner protein [candidate division WOR-3 bacterium].                       | GCA_011338235.1 |
| HGZ37950.1   | Calcineurin+TPR+GreAB-C+PIN*→               | Calcineurin+TPR+GreAB-C+PIN | 1423 | ENR19_05950  | Nitrospirae           | Nitrospirae bacterium                        | MAG TPA: hypothetical protein ENR19_05950, partial [Nitrospirae bacterium].                     | GCA_011331925.1 |
| HHC78382.1   | TPR+GreAB-C+PIN*→                           | TPR+GreAB-C+PIN             | 1134 | ENK46_00760  | Bacteroidetes         | Flavobacteriia bacterium                     | MAG TPA: hypothetical protein ENK46_00760 [Flavobacteriia bacterium].                           | GCA_011330545.1 |
| HIB63801.1   | TPR+GreAB-C+PIN*→                           | TPR+GreAB-C+PIN             | 1486 | EYO33_01435  | Planctomycetes        | Phycisphaerales bacterium                    | MAG TPA: hypothetical protein EYO33_01435 [Phycisphaerales bacterium].                          | GCA_012964585.1 |

| acc          | operon                       | architecture               | len  | gen.name      | taxend              | species                                      | define                                                                                 | gca             |
|--------------|------------------------------|----------------------------|------|---------------|---------------------|----------------------------------------------|----------------------------------------------------------------------------------------|-----------------|
| HIP26815.1   | TPR+GreAB-C+PIN*→            | TPR+GreAB-C+PIN            | 1038 | EYG80_04080   | Bacteroidetes       | Flavobacteriaceae bacterium                  | MAG TPA: tetratricopeptide repeat protein [Flavobacteriaceae bacterium].               | GCA_015662995.1 |
| KAA0086698.1 | TPR+PIN*→                    | TPR+PIN                    | 1159 | CIW52_01945   | Actinobacteria      | Mycolicibacterium sp. P9-64                  | hypothetical protein CIW52_01945 [Mycolicibacterium sp. P9-64].                        | GCA_008329605.1 |
| KAB1070169.1 | TPR+GreAB-C+PIN*→            | TPR+GreAB-C+PIN            | 641  | F6X53_30340   | Alphaproteobacteria | Methylobacterium soli                        | tetratricopeptide repeat protein [Methylobacterium soli].                              | GCA_008806385.1 |
| KCZ93824.1   | TPR+GreAB-C+PIN*→            | TPR+GreAB-C+PIN            | 1142 | HJO_00570     | Alphaproteobacteria | Hyphomonas johnsonii MHS-2                   | hypothetical protein HJO_00570 [Hyphomonas johnsonii MHS-2].                           | GCA_000685275.1 |
| KGF68042.1   | REase+TPR+GreAB-C+PIN*→      | REase+TPR+GreAB-C+PIN      | 1283 | LL06_18825    | Alphaproteobacteria | Hoeflea sp. BAL378                           | hypothetical protein LL06_18825 [Hoeflea sp. BAL378].                                  | GCA_000759435.1 |
| KGM47444.1   | REase+TPR+GreAB-C+PIN*→      | REase+TPR+GreAB-C+PIN      | 1329 | ATO9_17580    | Alphaproteobacteria | Pseudoceanicola atlanticus                   | hypothetical protein ATO9_17580 [Pseudoceanicola atlanticus].                          | GCA_000768315.1 |
| KGS12485.1   | GreAB-C+PIN*→                | GreAB-C+PIN                | 509  | OA77_21590    | Gammaproteobacteria | Pseudomonas coronafaciens                    | hypothetical protein OA77_21590, partial [Pseudomonas coronafaciens].                  | GCA_000773135.1 |
| KHO23731.1   | X+PIN*→                      | X+PIN                      | 762  | QQ44_16085    | Actinobacteria      | Mycolicibacterium setense                    | hypothetical protein QQ44_16085 [Mycolicibacterium setense].                           | GCA_000805375.1 |
| KIF65994.1   | REase+TPR+TPR+GreAB-C+PIN*→  | REase+TPR+TPR+GreAB-C+PIN  | 1274 | HY68_38205    | Actinobacteria      | Streptomyces sp. AcH 505                     | hypothetical protein HY68_38205 [Streptomyces sp. AcH 505].                            | GCA_000818175.1 |
| KIU53353.1   | REase+TPR+TPR+GreAB-C+PIN*→  | REase+TPR+TPR+GreAB-C+PIN  | 1254 | QU41_01355    | Alphaproteobacteria | Bradyrhizobium elkanii                       | hypothetical protein QU41_01355 [Bradyrhizobium elkanii].                              | GCA_000878305.1 |
| KJS28984.1   | TPR+GreAB-C+PIN*→            | TPR+GreAB-C+PIN            | 1318 | VR64_22320    | Deltaproteobacteria | Desulfatitaea sp. BRH_c12                    | MAG: hypothetical protein VR64_22320 [Desulfatitaea sp. BRH_c12].                      | GCA_000961655.1 |
| KOY46643.1   | HetE-N1→ TPR+GreAB-C+PIN*→   | TPR+GreAB-C+PIN            | 1085 | ACX03_05530   | Gammaproteobacteria | Vibrio parahaemolyticus                      | hypothetical protein ACX03_05530 [Vibrio parahaemolyticus].                            | GCA_001280625.1 |
| KPC32725.1   | PIN*→                        | PIN                        | 407  | ABJ99_1577    | Gammaproteobacteria | Pseudomonas syringae pv. cilantro            | Tetratricopeptide repeat protein [Pseudomonas syringae pv. cilantro].                  | GCA_001293775.1 |
| KPH04186.1   | GreAB-C+PIN*→                | GreAB-C+PIN                | 532  | AOG23_34735   | Alphaproteobacteria | Rhizobium acidisoli                          | hypothetical protein AOG23_34735 [Rhizobium acidisoli].                                | GCA_001297245.1 |
| KPW31206.1   | REase+TPR+GreAB-C+PIN*→      | REase+TPR+GreAB-C+PIN      | 1491 | ALO87_03437   | Gammaproteobacteria | Pseudomonas syringae pv. apii                | Uncharacterized protein ALO87_03437 [Pseudomonas syringae pv. apii].                   | GCA_001401385.1 |
| KPW71831.1   | PIN*→                        | PIN                        | 419  | ALO76_102575  | Gammaproteobacteria | Pseudomonas syringae pv. coriandricola       | hypothetical protein ALO76_102575 [Pseudomonas syringae pv. coriandricola].            | GCA_001400185.1 |
| KPX07181.1   | REase→ TPR+GreAB-C+PIN*→     | TPR+GreAB-C+PIN            | 882  | ALO74_05417   | Gammaproteobacteria | Pseudomonas syringae pv. cunninghamiae       | Uncharacterized protein ALO74_05417, partial [Pseudomonas syringae pv. cunninghamiae]. | GCA_001400795.1 |
| KQR06792.1   | TPR+PIN*→                    | TPR+PIN                    | 1157 | ASF74_05425   | Actinobacteria      | Arthrobacter sp. Leaf145                     | hypothetical protein ASF74_05425 [Arthrobacter sp. Leaf145].                           | GCA_001423565.1 |
| KQY47975.1   | HTH+PNPase+TPR+GreAB-C+PIN*→ | HTH+PNPase+TPR+GreAB-C+PIN | 1492 | ASD18_12170   | Actinobacteria      | Cellulomonas sp. Root137                     | hypothetical protein ASD18_12170 [Cellulomonas sp. Root137].                           | GCA_001426725.1 |
| KRK09263.1   | X+PIN*→                      | X+PIN                      | 1209 | FD11_GL001067 | Firmicutes          | Lactobacillus pobuzihii E100301 = KCTC 13174 | hypothetical protein FD11_GL001067 [Lactobacillus pobuzihii E100301 = KCTC 13174].     | GCA_001433815.1 |
| KSV64106.1   | REase+TPR+TPR+GreAB-C+PIN*→  | REase+TPR+TPR+GreAB-C+PIN  | 1352 | N182_36590    | Alphaproteobacteria | Sinorhizobium sp. GL2                        | hypothetical protein N182_36590 [Sinorhizobium sp. GL2].                               | GCA_001461715.1 |
| KTR52035.1   | PIN*→                        | PIN                        | 473  | NS359_08065   | Actinobacteria      | Curtobacterium oceanosedimentum              | hypothetical protein NS359_08065 [Curtobacterium oceanosedimentum].                    | GCA_001476135.1 |
| KVD10066.1   | REase+TPR+GreAB-C+PIN*→      | REase+TPR+GreAB-C+PIN      | 1276 | WI81_28275    | Betaproteobacteria  | Burkholderia ubonensis                       | hypothetical protein WI81_28275 [Burkholderia ubonensis].                              | GCA_001523425.1 |
| KVK86408.1   | REase+TPR+GreAB-C+PIN*→      | REase+TPR+GreAB-C+PIN      | 1305 | WJ44_35230    | Betaproteobacteria  | Burkholderia ubonensis                       | hypothetical protein WJ44_35230 [Burkholderia ubonensis].                              | GCA_001526225.1 |
| KVP54755.1   | PIN*→                        | PIN                        | 270  | WJ90_06090    | Betaproteobacteria  | Burkholderia ubonensis                       | hypothetical protein WJ90_06090 [Burkholderia ubonensis].                              | GCA_001527145.1 |
| KVR94766.1   | REase+TPR+GreAB-C+PIN*→      | REase+TPR+GreAB-C+PIN      | 1283 | WK29_06535    | Betaproteobacteria  | Burkholderia vietnamiensis                   | hypothetical protein WK29_06535 [Burkholderia vietnamiensis].                          | GCA_001528565.1 |

| acc          | operon                                            | architecture               | len  | gen.name     | taxend              | species                        | define                                                                     | gca             |
|--------------|---------------------------------------------------|----------------------------|------|--------------|---------------------|--------------------------------|----------------------------------------------------------------------------|-----------------|
| KVS41438.1   | REase+TPR+GreAB-C+PIN*→                           | REase+TPR+GreAB-C+PIN      | 1273 | WK37_19925   | Betaproteobacteria  | Burkholderia ubonensis         | hypothetical protein WK37_19925 [Burkholderia ubonensis].                  | GCA_001529725.1 |
| KWO74502.1   | REase+TPR+GreAB-C+PIN*→                           | REase+TPR+GreAB-C+PIN      | 1308 | WM31_08005   | Betaproteobacteria  | Burkholderia ubonensis         | hypothetical protein WM31_08005 [Burkholderia ubonensis].                  | GCA_001534425.1 |
| KWW10220.1   | HetE-N1→ TPR+GreAB-C+PIN→ TPR+GreAB-C+PIN*→       | TPR+GreAB-C+PIN            | 695  | VM82_06380   | Gammaproteobacteria | Pasteurella multocida          | hypothetical protein VM82_06380 [Pasteurella multocida].                   | GCA_001542975.1 |
| KXC04457.1   | X+PIN*→?→ Calcineurin→                            | X+PIN                      | 1058 | MhomT_16215  | Actinobacteria      | Microbacterium hominis         | hypothetical protein MhomT_16215 [Microbacterium hominis].                 | GCA_001553805.1 |
| KXF54879.1   | HTH+PNPase+TPR+GreAB-C+PIN*→                      | HTH+PNPase+TPR+GreAB-C+PIN | 1496 | AXA44_39745  | Actinobacteria      | Rhodococcus sp. SC4            | hypothetical protein AXA44_39745 [Rhodococcus sp. SC4].                    | GCA_001555475.1 |
| KYK33744.1   | TPR+GreAB-C+PIN*→                                 | TPR+GreAB-C+PIN            | 1243 | AYK18_14685  | Euryarchaeota       | Theionarchaea archaeon DG-70   | MAG: hypothetical protein AYK18_14685 [Theionarchaea archaeon DG-70].      | GCA_001595795.1 |
| KZM34260.1   | X+PIN*→                                           | X+PIN                      | 802  | OJAG_30920   | Actinobacteria      | Oerskovia enterophila          | hypothetical protein OJAG_30920 [Oerskovia enterophila].                   | GCA_001624335.1 |
| KZM57325.1   | TPR+PIN*→                                         | TPR+PIN                    | 1172 | A3Q36_16940  | Firmicutes          | Geobacillus stearothermophilus | hypothetical protein A3Q36_16940 [Geobacillus stearothermophilus].         | GCA_001624615.1 |
| MAK67575.1   | HetE-N1→ TPR+GreAB-C+PIN*→   <-REase+UvrD         | TPR+GreAB-C+PIN            | 1111 | CMH19_11360  | Gammaproteobacteria | Methylophaga sp.               | MAG: hypothetical protein CMH19_11360 [Methylophaga sp.].                  | GCA_002692615.1 |
| MAK82682.1   | REase+TPR+GreAB-C+PIN*→                           | REase+TPR+GreAB-C+PIN      | 1322 | CMJ17_12550  | Alphaproteobacteria | Phenylobacterium sp.           | MAG: hypothetical protein CMJ17_12550 [Phenylobacterium sp.].              | GCA_002693985.1 |
| MAM61427.1   | REase+TOPC→   <-?  REase+TPR+GreAB-C+PIN*→        | REase+TPR+GreAB-C+PIN      | 1313 | CMH11_08050  | Alphaproteobacteria | Maritimibacter sp.             | MAG: hypothetical protein CMH11_08050 [Maritimibacter sp.].                | GCA_002695005.1 |
| MAQ47157.1   | TPR+GreAB-C+PIN*→                                 | TPR+GreAB-C+PIN            | 928  | CL812_15115  | Alphaproteobacteria | Actibacterium sp.              | MAG: hypothetical protein CL812_15115 [Actibacterium sp.].                 | GCA_002701285.1 |
| MAX35781.1   | REase+TPR+GreAB-C+PIN*→                           | REase+TPR+GreAB-C+PIN      | 1254 | CME33_04335  | Planctomycetes      | Gimesia sp.                    | MAG: hypothetical protein CME33_04335 [Gimesia sp.].                       | GCA_002706765.1 |
| MAX78311.1   | REase+TPR+GreAB-C+PIN*→                           | REase+TPR+GreAB-C+PIN      | 1318 | CMN12_16605  | Alphaproteobacteria | Roseobacter sp.                | MAG: hypothetical protein CMN12_16605 [Roseobacter sp.].                   | GCA_002706785.1 |
| MBA2669970.1 | TPR+GreAB-C+PIN*→                                 | TPR+GreAB-C+PIN            | 581  | H0U67_06335  | Gemmatimonadetes    | Gemmatimonadetes bacterium     | MAG: hypothetical protein H0U67_06335 [Gemmatimonadetes bacterium].        | GCA_013697765.1 |
| MBA3005285.1 | TPR+GreAB-C+PIN*→                                 | TPR+GreAB-C+PIN            | 1285 | FP810_01590  | Deltaproteobacteria | Desulfocapsa sp.               | MAG: hypothetical protein FP810_01590 [Desulfocapsa sp.].                  | GCA_013792135.1 |
| MBA3178888.1 | HetE-N1→ TPR+GreAB-C+PIN*→?→   <-Trypsin          | TPR+GreAB-C+PIN            | 1121 | CBX59_021210 | Gammaproteobacteria | Salmonella enterica            | hypothetical protein CBX59_021210 [Salmonella enterica].                   | GCA_006112745.2 |
| MBA3341438.1 | REase+TPR+GreAB-C+PIN*→                           | REase+TPR+GreAB-C+PIN      | 1397 | H0T48_06340  | Gemmatimonadetes    | Gemmatimonadaceae bacterium    | MAG: hypothetical protein H0T48_06340 [Gemmatimonadaceae bacterium].       | GCA_013813715.1 |
| MBA3557151.1 | TPR+GreAB-C+PIN*→                                 | TPR+GreAB-C+PIN            | 877  | H0W30_00995  | Gemmatimonadetes    | Gemmatimonadaceae bacterium    | MAG: hypothetical protein H0W30_00995 [Gemmatimonadaceae bacterium].       | GCA_013817545.1 |
| MBA3619565.1 | REase→ PIN*→                                      | PIN                        | 572  | H0W56_08245  | Actinobacteria      | Acidothermales bacterium       | MAG: hypothetical protein H0W56_08245, partial [Acidothermales bacterium]. | GCA_013817005.1 |
| MBA3973802.1 | TPR+GreAB-C+PIN*→                                 | TPR+GreAB-C+PIN            | 1263 | C0504_06240  | Acidobacteria       | Candidatus Solibacter sp.      | MAG: hypothetical protein C0504_06240 [Candidatus Solibacter sp.].         | GCA_013822245.1 |
| MBA4090929.1 | REase+TPR+GreAB-C+PIN*→                           | REase+TPR+GreAB-C+PIN      | 1315 | C0494_10085  | Alphaproteobacteria | Sphingobium sp.                | MAG: hypothetical protein C0494_10085 [Sphingobium sp.].                   | GCA_013822485.1 |
| MBA4148880.1 | TPR+PIN*→                                         | TPR+PIN                    | 1103 | H0X66_12260  | Verrucomicrobia     | Verrucomicrobia bacterium      | MAG: hypothetical protein H0X66_12260 [Verrucomicrobia bacterium].         | GCA_013820875.1 |
| MBB1073428.1 | REase+TPR+GreAB-C+PIN*→                           | REase+TPR+GreAB-C+PIN      | 1321 | HUU62_03265  | Betaproteobacteria  | Rhodoferrax jenense            | DUF4365 domain-containing protein [Rhodoferrax jenense].                   | GCA_014145235.1 |
| MBB1121889.1 | DOC+HTH→ REase+TOPC→ HetE-N1→?→ TPR+GreAB-C+PIN*→ | TPR+GreAB-C+PIN            | 992  | H4983_26725  | Gammaproteobacteria | Pseudomonas aeruginosa         | hypothetical protein H4983_26725 [Pseudomonas aeruginosa].                 | GCA_014145725.1 |
| MBB4577222.1 | REase+TPR+GreAB-C+PIN*→                           | REase+TPR+GreAB-C+PIN      | 1268 | GGE58_005472 | Alphaproteobacteria | Rhizobium lentis               | tetratricopeptide (TPR) repeat protein [Rhizobium lentis].                 | GCA_014198785.1 |

| acc          | operon                            | architecture          | len  | gen.name     | taxend              | species                                | define                                                                                                                      | gca             |
|--------------|-----------------------------------|-----------------------|------|--------------|---------------------|----------------------------------------|-----------------------------------------------------------------------------------------------------------------------------|-----------------|
| MBB5991665.1 | REase→ TPR+GreAB-C+PIN*→?→?→ HNH→ | TPR+GreAB-C+PIN       | 1242 | HNP04_003690 | Gammaproteobacteria | <i>Pseudomonas viridiflava</i>         | tetratricopeptide (TPR) repeat protein/transcription elongation GreA/GreB family factor [ <i>Pseudomonas viridiflava</i> ]. | GCA_014204055.1 |
| MBB6509406.1 | TPR+GreAB-C+PIN*→                 | TPR+GreAB-C+PIN       | 780  | F4695_002763 | Alphaproteobacteria | <i>Rhizobium soli</i>                  | putative nucleic acid-binding protein [ <i>Rhizobium soli</i> ].                                                            | GCA_014207075.1 |
| MBB9310955.1 | TPR+GreAB-C+PIN*→                 | TPR+GreAB-C+PIN       | 575  | FSF17_011690 | Gammaproteobacteria | <i>Escherichia coli</i>                | hypothetical protein FSF17_011690 [ <i>Escherichia coli</i> ].                                                              | GCA_012385615.2 |
| MBC6414865.1 | REase+TPR+GreAB-C+PIN*→           | REase+TPR+GreAB-C+PIN | 1326 | GDA46_00495  | Oligoflexia         | <i>Bdellovibrionales bacterium</i>     | MAG: hypothetical protein GDA46_00495 [ <i>Bdellovibrionales bacterium</i> ].                                               | GCA_014323935.1 |
| MBC70602.1   | REase+TPR+GreAB-C+PIN*→           | REase+TPR+GreAB-C+PIN | 1253 | CL492_17300  | Gammaproteobacteria | <i>Acinetobacter</i> sp.               | MAG: hypothetical protein CL492_17300 [ <i>Acinetobacter</i> sp.].                                                          | GCA_002711945.1 |
| MBC7145404.1 | REase+TPR+GreAB-C+PIN*→           | REase+TPR+GreAB-C+PIN | 1332 | H5U24_08360  | Alphaproteobacteria | <i>Thioclava marina</i>                | MAG: hypothetical protein H5U24_08360 [ <i>Thioclava marina</i> ].                                                          | GCA_014359625.1 |
| MBC7391182.1 | TPR+GreAB-C+PIN*→                 | TPR+GreAB-C+PIN       | 1270 | H7329_18405  | Verrucomicrobia     | <i>Cytophagales bacterium</i>          | MAG: tetratricopeptide repeat protein [ <i>Opitutaceae bacterium</i> ].                                                     | GCA_014376535.1 |
| MBC74230.1   | TPR+GreAB-C+PIN*→                 | TPR+GreAB-C+PIN       | 1131 | CMH47_18575  | Bacteroidetes       | <i>Muricauda</i> sp.                   | MAG: hypothetical protein CMH47_18575 [ <i>Muricauda</i> sp.].                                                              | GCA_002711825.1 |
| MBD0373736.1 | TPR+GreAB-C*→                     | TPR+GreAB-C           | 885  | ICV60_23090  | Acidobacteria       | <i>Pyrinomonadaceae bacterium</i>      | MAG: tetratricopeptide repeat protein, partial [ <i>Pyrinomonadaceae bacterium</i> ].                                       | GCA_014534425.1 |
| MBD3293793.1 | TPR+PIN*→                         | TPR+PIN               | 1505 | GF393_12790  | Armatimonadetes     | <i>Armatimonadia bacterium</i>         | MAG: hypothetical protein GF393_12790 [ <i>Armatimonadia bacterium</i> ].                                                   | GCA_014728405.1 |
| MBD3811358.1 | REase+TPR+GreAB-C+PIN*→           | REase+TPR+GreAB-C+PIN | 1374 | IE917_03935  | Betaproteobacteria  | <i>Betaproteobacteria bacterium</i>    | MAG: hypothetical protein IE917_03935 [ <i>Betaproteobacteria bacterium</i> ].                                              | GCA_014764035.1 |
| MBD8566197.1 | TPR+GreAB-C+PIN*→                 | TPR+GreAB-C+PIN       | 1235 | IFU01_18215  | Betaproteobacteria  | <i>Oxalobacteraceae</i> sp. CFBP 8763  | hypothetical protein IFU01_18215 [ <i>Oxalobacteraceae</i> sp. CFBP 8763].                                                  | GCA_014841525.1 |
| MBD8722144.1 | REase+TPR+GreAB-C+PIN*→           | REase+TPR+GreAB-C+PIN | 1511 | IFT43_02050  | Betaproteobacteria  | <i>Oxalobacteraceae</i> sp. CFBP 13708 | hypothetical protein IFT43_02050 [ <i>Oxalobacteraceae</i> sp. CFBP 13708].                                                 | GCA_014842315.1 |
| MBE2259083.1 | REase+TPR+GreAB-C+PIN*→           | REase+TPR+GreAB-C+PIN | 1335 | IAE88_09505  | Alphaproteobacteria | <i>Rhodobacteraceae bacterium</i>      | MAG: hypothetical protein IAE88_09505 [ <i>Rhodobacteraceae bacterium</i> ].                                                | GCA_014879755.1 |
| MBE3996728.1 | HetE-N1→?→ TPR+GreAB-C+PIN*→      | TPR+GreAB-C+PIN       | 910  | HJ133_08285  | Gammaproteobacteria | <i>Vibrio parahaemolyticus</i>         | hypothetical protein HJ133_08285 [ <i>Vibrio parahaemolyticus</i> ].                                                        | GCA_014919735.1 |
| MBE7465263.1 | REase+TPR+GreAB-C+PIN*→           | REase+TPR+GreAB-C+PIN | 1253 | HS116_17430  | Planctomycetes      | <i>Planctomycetes bacterium</i>        | MAG: hypothetical protein HS116_17430 [ <i>Planctomycetes bacterium</i> ].                                                  | GCA_015075375.1 |
| MBE8523541.1 | TPR+PIN*→                         | TPR+PIN               | 1310 | ILP97_39665  | Actinobacteria      | <i>Amycolatopsis</i> sp. H6(2020)      | hypothetical protein ILP97_39665 [ <i>Amycolatopsis</i> sp. H6(2020)].                                                      | GCA_015163035.1 |
| MBE8960063.1 | GreAB-C*→                         | GreAB-C               | 307  | IH766_22715  | Gammaproteobacteria | <i>Escherichia coli</i>                | hypothetical protein IH766_22715, partial [ <i>Escherichia coli</i> ].                                                      | GCA_015206795.1 |
| MBE9468467.1 | TPR+GreAB-C+PIN*→                 | TPR+GreAB-C+PIN       | 1221 | IMY72_09155  | Bacteroidetes       | <i>Bacteroidetes bacterium</i>         | MAG: hypothetical protein IMY72_09155 [ <i>Bacteroidetes bacterium</i> ].                                                   | GCA_015222055.1 |
| MBF0231519.1 | TPR+GreAB-C+PIN*→                 | TPR+GreAB-C+PIN       | 1223 | HQK65_00575  | Deltaproteobacteria | <i>Desulfamplus</i> sp.                | MAG: hypothetical protein HQK65_00575 [ <i>Desulfamplus</i> sp.].                                                           | GCA_015231525.1 |
| MBF0529118.1 | TPR+GreAB-C+PIN*→                 | TPR+GreAB-C+PIN       | 678  | HQK55_07585  | Deltaproteobacteria | <i>Deltaproteobacteria bacterium</i>   | MAG: hypothetical protein HQK55_07585 [ <i>Deltaproteobacteria bacterium</i> ].                                             | GCA_015233515.1 |
| MBF3699451.1 | TPR+GreAB-C+PIN*→   <-HTH+HTH     | TPR+GreAB-C+PIN       | 872  | ISF48_14710  | Betaproteobacteria  | <i>Burkholderia pseudomallei</i>       | hypothetical protein ISF48_14710 [ <i>Burkholderia pseudomallei</i> ].                                                      | GCA_015319855.1 |
| MBF3842067.1 | TPR+GreAB-C+PIN*→   <-HTH+HTH     | TPR+GreAB-C+PIN       | 872  | ISF68_21105  | Betaproteobacteria  | <i>Burkholderia pseudomallei</i>       | hypothetical protein ISF68_21105 [ <i>Burkholderia pseudomallei</i> ].                                                      | GCA_015320325.1 |
| MBF4269202.1 | TPR+GreAB-C*→                     | TPR+GreAB-C           | 686  | EAY71_20240  | Gammaproteobacteria | <i>Vibrio anguillarum</i>              | hypothetical protein EAY71_20240, partial [ <i>Vibrio anguillarum</i> ].                                                    | GCA_015343035.1 |
| MBF9243682.1 | REase+TPR+GreAB-C+PIN*→           | REase+TPR+GreAB-C+PIN | 1438 | I4I80_05390  | Gammaproteobacteria | <i>Pseudomonas syringae</i> pv. tomato | hypothetical protein I4I80_05390 [ <i>Pseudomonas syringae</i> pv. tomato].                                                 | GCA_015694365.1 |

| acc          | operon                                       | architecture              | len  | gen.name    | taxend              | species                                                                 | define                                                                                          | gca             |
|--------------|----------------------------------------------|---------------------------|------|-------------|---------------------|-------------------------------------------------------------------------|-------------------------------------------------------------------------------------------------|-----------------|
| MBF9246381.1 | REase+TPR+GreAB-C+PIN*→                      | REase+TPR+GreAB-C+PIN     | 1320 | I4I80_19980 | Gammaproteobacteria | <i>Pseudomonas syringae</i> pv. <i>tomato</i>                           | DUF4365 domain-containing protein [Pseudomonas syringae pv. tomato].                            | GCA_015694365.1 |
| MBG2992436.1 | PAIREDC-HTH→ PSE→ HetE-N1→ TPR+GreAB-C+PIN*→ | TPR+GreAB-C+PIN           | 1092 | I4607_12420 | Gammaproteobacteria | <i>Proteus mirabilis</i>                                                | hypothetical protein I4607_12420 [Proteus mirabilis].                                           | GCA_015723275.1 |
| MBG6040926.1 | PAIREDC-HTH→ PSE→ HetE-N1→ TPR+GreAB-C+PIN*→ | TPR+GreAB-C+PIN           | 1092 | I5F94_05610 | Gammaproteobacteria | <i>Proteus mirabilis</i>                                                | hypothetical protein I5F94_05610 [Proteus mirabilis].                                           | GCA_015740165.1 |
| MBG6251627.1 | TPR+GreAB-C+PIN*→                            | TPR+GreAB-C+PIN           | 1140 | I5I20_11010 | Gammaproteobacteria | <i>Pseudomonas aeruginosa</i>                                           | hypothetical protein I5I20_11010 [Pseudomonas aeruginosa].                                      | GCA_015762745.1 |
| MBG7090225.1 | TPR+GreAB-C+PIN*→                            | TPR+GreAB-C+PIN           | 1170 | I5G28_04925 | Gammaproteobacteria | <i>Pseudomonas aeruginosa</i>                                           | hypothetical protein I5G28_04925 [Pseudomonas aeruginosa].                                      | GCA_015765435.1 |
| MBH04121.1   | REase+TPR+GreAB-C+PIN*→                      | REase+TPR+GreAB-C+PIN     | 1338 | CMP08_08385 | Gammaproteobacteria | Xanthomonadales bacterium                                               | MAG: hypothetical protein CMP08_08385 [Xanthomonadales bacterium].                              | GCA_002715985.1 |
| MBH1476826.1 | REase+TPR+GreAB-C+PIN*→                      | REase+TPR+GreAB-C+PIN     | 1243 | I5U61_05170 | Gammaproteobacteria | <i>Stenotrophomonas maltophilia</i>                                     | CDC27 family protein [Stenotrophomonas maltophilia].                                            | GCA_015997065.1 |
| MBH7847781.1 | TPR+GreAB-C+PIN*→                            | TPR+GreAB-C+PIN           | 1071 | I6A75_20240 | Firmicutes          | <i>Clostridioides difficile</i>                                         | hypothetical protein I6A75_20240 [Clostridioides difficile].                                    | GCA_016052935.1 |
| MBI1182363.1 | REase+TPR+TPR+GreAB-C+PIN*→                  | REase+TPR+TPR+GreAB-C+PIN | 1295 | GC201_17615 | Alphaproteobacteria | Alphaproteobacteria bacterium                                           | MAG: hypothetical protein GC201_17615 [Alphaproteobacteria bacterium].                          | GCA_016124315.1 |
| MBI1904375.1 | TPR+GreAB-C+PIN*→                            | TPR+GreAB-C+PIN           | 1292 | HYS13_25040 | Planctomycetes      | Planctomycetia bacterium                                                | MAG: hypothetical protein HYS13_25040 [Planctomycetia bacterium].                               | GCA_016177915.1 |
| MBI3888209.1 | TPR+PIN*→                                    | TPR+PIN                   | 1190 | HY311_00230 | Bacteria            | Candidatus Nomurabacteria bacterium                                     | MAG: tetratricopeptide repeat protein [Candidatus Nomurabacteria bacterium].                    | GCA_016199805.1 |
| MBI4633825.1 | REase+TPR+GreAB-C+PIN*→                      | REase+TPR+GreAB-C+PIN     | 1294 | HY742_08030 | Deltaproteobacteria | Deltaproteobacteria bacterium                                           | MAG: hypothetical protein HY742_08030 [Deltaproteobacteria bacterium].                          | GCA_016209105.1 |
| MBI4696055.1 | Cas_Cas1→ REase+TPR+GreAB-C+PIN*→            | REase+TPR+GreAB-C+PIN     | 1313 | HY749_18755 | Gammaproteobacteria | Gammaproteobacteria bacterium                                           | MAG: DUF4365 domain-containing protein [Gammaproteobacteria bacterium].                         | GCA_016209015.1 |
| MBI4846278.1 | TM+SIR2+TPR+PIN+PIN+TM*→                     | TM+SIR2+TPR+PIN+PIN+TM    | 2304 | HY810_07390 | PVC group           | Candidatus Omnitrphica bacterium                                        | MAG: SIR2 family protein [Candidatus Omnitrphica bacterium].                                    | GCA_016213925.1 |
| MBI5207389.1 | HTH+REase+PIN*→                              | HTH+REase+PIN             | 808  | HY934_06310 | Bacteria            | Candidatus Firestonebacteria bacterium                                  | MAG: helix-turn-helix domain-containing protein [Candidatus Firestonebacteria bacterium].       | GCA_016212735.1 |
| MBI5354508.1 | TPR+GreAB-C+PIN*→                            | TPR+GreAB-C+PIN           | 1282 | HZB50_17850 | Chloroflexi         | <i>Chloroflexi</i> bacterium                                            | MAG: hypothetical protein HZB50_17850 [Chloroflexi bacterium].                                  | GCA_016219545.1 |
| MBI5356660.1 | TPR+PIN*→   <-?<-?  HTH→                     | TPR+PIN                   | 1074 | HZB78_03530 | Bacteria            | Candidatus Collierbacteria bacterium                                    | MAG: hypothetical protein HZB78_03530 [Candidatus Collierbacteria bacterium].                   | GCA_016219325.1 |
| MBI5458930.1 | HEPN→ REase+SNF2→ REase+TPR+GreAB-C+PIN*→    | REase+TPR+GreAB-C+PIN     | 1256 | HY987_04275 | Euryarchaeota       | <i>Methanobacterium</i> sp.                                             | MAG: hypothetical protein HY987_04275 [Methanobacterium sp.].                                   | GCA_016217785.1 |
| MBI5516335.1 | GreAB*→                                      | GreAB                     | 172  | HY909_21300 | Deltaproteobacteria | Deltaproteobacteria bacterium                                           | MAG: GreA/GreB family elongation factor [Deltaproteobacteria bacterium].                        | GCA_016218725.1 |
| MBI5711428.1 | GreAB*→                                      | GreAB                     | 903  | HZC42_14175 | Bacteria            | Candidatus Eisenbacteria bacterium                                      | MAG: GreA/GreB family elongation factor [Candidatus Eisenbacteria bacterium].                   | GCA_016223045.1 |
| MBI5910925.1 | REase+TPR+GreAB-C+PIN*→                      | REase+TPR+GreAB-C+PIN     | 1318 | HY848_13355 | Betaproteobacteria  | Betaproteobacteria bacterium                                            | MAG: hypothetical protein HY848_13355 [Betaproteobacteria bacterium].                           | GCA_016234705.1 |
| MBI5925874.1 | REase+TPR+GreAB-C+PIN*→                      | REase+TPR+GreAB-C+PIN     | 1369 | HY836_09780 | Betaproteobacteria  | <i>Aquabacterium</i> sp.                                                | MAG: hypothetical protein HY836_09780 [Aquabacterium sp.].                                      | GCA_016234775.1 |
| MBI6873434.1 | TPR+PIN*→                                    | TPR+PIN                   | 1232 | I6U51_12055 | Firmicutes          | <i>Clostridium aciditolerans</i>                                        | hypothetical protein I6U51_12055 [Clostridium aciditolerans].                                   | GCA_016316925.1 |
| MBJ3588954.1 | TPR+GreAB-C+PIN*→                            | TPR+GreAB-C+PIN           | 924  | JGC49_23910 | Gammaproteobacteria | <i>Salmonella enterica</i> subsp. <i>enterica</i> serovar <i>London</i> | hypothetical protein JGC49_23910, partial [Salmonella enterica subsp. enterica serovar London]. | GCA_016412075.1 |
| MBJ7510055.1 | REase+TPR+TPR+GreAB-C+PIN*→?→ HNH→           | REase+TPR+TPR+GreAB-C+PIN | 1324 | JHC97_02180 | Alphaproteobacteria | <i>Brevundimonas</i> sp.                                                | MAG: hypothetical protein JHC97_02180 [Brevundimonas sp.].                                      | GCA_016463795.1 |

| acc          | operon                           | architecture                | len  | gen.name     | taxend              | species                       | define                                                                 | gca             |
|--------------|----------------------------------|-----------------------------|------|--------------|---------------------|-------------------------------|------------------------------------------------------------------------|-----------------|
| MBK4592903.1 | TPR+GreAB-C+PIN*→                | TPR+GreAB-C+PIN             | 444  | JJQ23_24565  | Gammaproteobacteria | Enterobacter hormaechei       | hypothetical protein JJQ23_24565, partial [Enterobacter hormaechei].   | GCA_016633275.1 |
| MBK4660580.1 | TPR+GreAB-C*→                    | TPR+GreAB-C                 | 362  | JJQ36_24785  | Gammaproteobacteria | Enterobacter hormaechei       | hypothetical protein JJQ36_24785, partial [Enterobacter hormaechei].   | GCA_016633665.1 |
| MBK4769022.1 | HetE-N1→ TPR+GreAB-C+PIN*→       | TPR+GreAB-C+PIN             | 1118 | FT726_04985  | Gammaproteobacteria | Pantoea sp. Morm              | MAG: hypothetical protein FT726_04985 [Pantoea sp. Morm].              | GCA_016643525.1 |
| MBK5650341.1 | REase+TPR+TPR+GreAB-C+PIN*→      | REase+TPR+TPR+GreAB-C+PIN   | 1254 | I4N50_01815  | Alphaproteobacteria | Rhizobium sp.                 | MAG: hypothetical protein I4N50_01815, partial [Rhizobium sp.].        | GCA_016652855.1 |
| MBK7033605.1 | TPR+GreAB-C+PIN*→                | TPR+GreAB-C+PIN             | 852  | IPH49_10150  | Ignavibacteriae     | Ignavibacteria bacterium      | MAG: hypothetical protein IPH49_10150 [Ignavibacteria bacterium].      | GCA_016708405.1 |
| MBK7130254.1 | TPR+GreAB-C+PIN*→                | TPR+GreAB-C+PIN             | 1238 | IPH66_12960  | Bacteroidetes       | Crocinitomicaceae bacterium   | MAG: hypothetical protein IPH66_12960 [Crocinitomicaceae bacterium].   | GCA_016708105.1 |
| MBK7149038.1 | TPR+GreAB-C+PIN*→?→?→?→ TRD+TRD→ | TPR+GreAB-C+PIN             | 1255 | IPH78_09510  | Bacteroidetes       | Bacteroidetes bacterium       | MAG: tetratricopeptide repeat protein [Bacteroidetes bacterium].       | GCA_016707905.1 |
| MBK7953772.1 | REase+TPR+GreAB-C+PIN*→          | REase+TPR+GreAB-C+PIN       | 1351 | IPK02_07330  | Betaproteobacteria  | Candidatus Accumulibacter sp. | MAG: hypothetical protein IPK02_07330 [Candidatus Accumulibacter sp.]. | GCA_016713625.1 |
| MBK8138001.1 | TPR+GreAB-C+PIN*→                | TPR+GreAB-C+PIN             | 749  | IPK52_19665  | Chloroflexi         | Chloroflexi bacterium         | MAG: hypothetical protein IPK52_19665 [Chloroflexi bacterium].         | GCA_016712885.1 |
| MBK8143858.1 | TPR+PIN*→                        | TPR+PIN                     | 641  | IPK62_02070  | Bacteroidetes       | Bacteroidetes bacterium       | MAG: hypothetical protein IPK62_02070 [Bacteroidetes bacterium].       | GCA_016712665.1 |
| MBK8927388.1 | TPR+GreAB-C+PIN*→                | TPR+GreAB-C+PIN             | 1238 | IPM74_16180  | Bacteroidetes       | Crocinitomicaceae bacterium   | MAG: hypothetical protein IPM74_16180 [Crocinitomicaceae bacterium].   | GCA_016720025.1 |
| MBK9927324.1 | TPR+GreAB-C+PIN*→                | TPR+GreAB-C+PIN             | 1144 | IPP66_18800  | Chloroflexi         | Anaerolineales bacterium      | MAG: tetratricopeptide repeat protein [Anaerolineales bacterium].      | GCA_016721115.1 |
| MBL0869327.1 | TPR+GreAB-C+PIN*→                | TPR+GreAB-C+PIN             | 1510 | IBJ18_01985  | Planctomycetes      | Phycisphaerales bacterium     | MAG: SIR2 family protein [Phycisphaerales bacterium].                  | GCA_016741915.1 |
| MBL0919126.1 | REase+TPR+GreAB-C+PIN*→          | REase+TPR+GreAB-C+PIN       | 1320 | IBJ14_10515  | Betaproteobacteria  | Hydrogenophaga sp.            | MAG: DUF4365 domain-containing protein [Hydrogenophaga sp.].           | GCA_016741995.1 |
| MBL1279106.1 | TPR+PIN*→                        | TPR+PIN                     | 1234 | COA33_002470 | Bacteroidetes       | Fluviicola sp.                | MAG: hypothetical protein COA33_002470 [Fluviicola sp.].               | GCA_002734065.2 |
| MBL4609540.1 | HetE-N1→ TPR+GreAB-C+PIN*→       | TPR+GreAB-C+PIN             | 1114 | JKY58_02600  | Gammaproteobacteria | Pseudomonas sp.               | MAG: hypothetical protein JKY58_02600 [Pseudomonas sp.].               | GCA_016763285.1 |
| MBL7760873.1 | TPR+GreAB-C+PIN*→                | TPR+GreAB-C+PIN             | 1264 | JNK08_09270  | Bacteroidetes       | Sediminibacterium sp.         | MAG: hypothetical protein JNK08_09270 [Sediminibacterium sp.].         | GCA_016786865.1 |
| MBL7768787.1 | TPR+GreAB-C+PIN*→                | TPR+GreAB-C+PIN             | 1258 | JNK20_07425  | Bacteroidetes       | Flavipsychrobacter sp.        | MAG: hypothetical protein JNK20_07425 [Flavipsychrobacter sp.].        | GCA_016787265.1 |
| MBL7772244.1 | TPR+GreAB-C+PIN*→                | TPR+GreAB-C+PIN             | 1151 | JNM95_05270  | Bacteroidetes       | Chitinophagaceae bacterium    | MAG: hypothetical protein JNM95_05270 [Chitinophagaceae bacterium].    | GCA_016787065.1 |
| MBL7856049.1 | TPR+GreAB-C+PIN*→                | TPR+GreAB-C+PIN             | 1173 | JNM57_00050  | Bacteroidetes       | Cyclobacteriaceae bacterium   | MAG: hypothetical protein JNM57_00050 [Cyclobacteriaceae bacterium].   | GCA_016787565.1 |
| MBL8263961.1 | REase+TPR+GreAB-C+PIN*→          | REase+TPR+GreAB-C+PIN       | 1239 | JNM58_16225  | Gammaproteobacteria | Xanthomonadaceae bacterium    | MAG: hypothetical protein JNM58_16225 [Xanthomonadaceae bacterium].    | GCA_016789405.1 |
| MBL8602392.1 | <-SIG+SM-MscS<-?<-?  GreAB*→     | GreAB                       | 172  | JNK72_10760  | Deltaproteobacteria | Myxococcales bacterium        | MAG: GreA/GreB family elongation factor [Myxococcales bacterium].      | GCA_016792845.1 |
| MBL8821106.1 | REase→?→ REase+TPR+GreAB-C+PIN*→ | REase+TPR+GreAB-C+PIN       | 1262 | JNJ77_00865  | Planctomycetes      | Planctomycetia bacterium      | MAG: hypothetical protein JNJ77_00865 [Planctomycetia bacterium].      | GCA_016795155.1 |
| MBL8873833.1 | MNS+TPR+PIN*→                    | MNS+TPR+PIN                 | 2502 | JNK90_28920  | Planctomycetes      | Planctomycetaceae bacterium   | MAG: tetratricopeptide repeat protein [Planctomycetaceae bacterium].   | GCA_016792705.1 |
| MBL8874044.1 | TPR+GreAB-C+PIN*→                | TPR+GreAB-C+PIN             | 1287 | JNK90_29995  | Planctomycetes      | Planctomycetaceae bacterium   | MAG: hypothetical protein JNK90_29995 [Planctomycetaceae bacterium].   | GCA_016792705.1 |
| MBL9102506.1 | Calcineurin+TPR+GreAB-C+PIN*→    | Calcineurin+TPR+GreAB-C+PIN | 1429 | JNL82_16210  | Deltaproteobacteria | Myxococcales bacterium        | MAG: metallophosphoesterase [Myxococcales bacterium].                  | GCA_016793465.1 |

| acc          | operon                                              | architecture              | len  | gen.name    | taxend              | species                           | define                                                                       | gca             |
|--------------|-----------------------------------------------------|---------------------------|------|-------------|---------------------|-----------------------------------|------------------------------------------------------------------------------|-----------------|
| MBM0224540.1 | TPR+PIN*→                                           | TPR+PIN                   | 990  | JNW87_02235 | Actinobacteria      | Micromonospora sp. ATA51          | hypothetical protein JNW87_02235 [Micromonospora sp. ATA51].                 | GCA_016802855.1 |
| MBM0258116.1 | TM+TPR+PIN*→                                        | TM+TPR+PIN                | 1165 | JNW89_16135 | Actinobacteria      | Micromonospora sp. 4G55           | hypothetical protein JNW89_16135 [Micromonospora sp. 4G55].                  | GCA_016803375.1 |
| MBM4070384.1 | TPR+GreAB-C*→                                       | TPR+GreAB-C               | 409  | FJ271_15725 | Planctomycetes      | Planctomycetes bacterium          | MAG: hypothetical protein FJ271_15725 [Planctomycetes bacterium].            | GCA_016873095.1 |
| MBM4845996.1 | HetE-N1→ HetE-N1+TPR+GreAB-C+PIN*→                  | HetE-N1+TPR+GreAB-C+PIN   | 1091 | HYO58_20990 | Gammaproteobacteria | Vibrio parahaemolyticus           | hypothetical protein HYO58_20990 [Vibrio parahaemolyticus].                  | GCA_016876175.1 |
| MBN1214554.1 | TPR+PIN*→                                           | TPR+PIN                   | 1151 | JXA99_03840 | Asgard group        | Candidatus Lokiarchaeota archaeon | MAG: hypothetical protein JXA99_03840 [Candidatus Lokiarchaeota archaeon].   | GCA_016926735.1 |
| MBN1453691.1 | TPR+GreAB-C+PIN*→                                   | TPR+GreAB-C+PIN           | 1287 | JW963_21935 | Chloroflexi         | Anaerolineales bacterium          | MAG: hypothetical protein JW963_21935 [Anaerolineales bacterium].            | GCA_016928525.1 |
| MBN2019675.1 | TPR+PIN*→                                           | TPR+PIN                   | 1063 | JW749_05560 | Planctomycetes      | Sedimentisphaerales bacterium     | MAG: tetratricopeptide repeat protein [Sedimentisphaerales bacterium].       | GCA_016932095.1 |
| MBN2455312.1 | TPR+GreAB-C+PIN*→                                   | TPR+GreAB-C+PIN           | 958  | JXB29_02055 | Planctomycetes      | Sedimentisphaerales bacterium     | MAG: hypothetical protein JXB29_02055 [Sedimentisphaerales bacterium].       | GCA_016935195.1 |
| MBN4052768.1 | TPR+GreAB-C+PIN*→                                   | TPR+GreAB-C+PIN           | 1150 | JYU07_00650 | Chloroflexi         | Roseiflexus sp. AH-315-K22        | hypothetical protein JYU07_00650, partial [Roseiflexus sp. AH-315-K22].      | GCA_017114345.1 |
| MBN5297052.1 | HetE-N1→ TPR+GreAB-C+PIN*→                          | TPR+GreAB-C+PIN           | 1090 | JY477_14370 | Gammaproteobacteria | Serratia marcescens               | hypothetical protein JY477_14370 [Serratia marcescens].                      | GCA_017152845.1 |
| MBN8213566.1 | REase+TPR+GreAB-C+PIN*→                             | REase+TPR+GreAB-C+PIN     | 1240 | J0M09_11660 | Gammaproteobacteria | Xanthomonadales bacterium         | MAG: hypothetical protein J0M09_11660 [Xanthomonadales bacterium].           | GCA_017302135.1 |
| MBN8506452.1 | REase+TPR+GreAB-C+PIN*→                             | REase+TPR+GreAB-C+PIN     | 1310 | J0L58_18450 | Betaproteobacteria  | Burkholderiales bacterium         | MAG: DUF4365 domain-containing protein [Burkholderiales bacterium].          | GCA_017302655.1 |
| MBN8549455.1 | <-HNH<-?<-?  ?→   <-?  ?→?→ REase+TPR+GreAB-C+PIN*→ | REase+TPR+GreAB-C+PIN     | 1254 | J0M12_09085 | Deltaproteobacteria | Deltaproteobacteria bacterium     | MAG: hypothetical protein J0M12_09085 [Deltaproteobacteria bacterium].       | GCA_017302875.1 |
| MBN8618419.1 | TPR+PIN*→                                           | TPR+PIN                   | 1277 | J0L63_05915 | Chloroflexi         | Anaerolineae bacterium            | MAG: hypothetical protein J0L63_05915 [Anaerolineae bacterium].              | GCA_017303775.1 |
| MBN8865737.1 | TPR+GreAB-C+PIN*→   <-REase                         | TPR+GreAB-C+PIN           | 435  | J0H92_20355 | Bacteroidetes       | Sphingobacteriales bacterium      | MAG: hypothetical protein J0H92_20355 [Sphingobacteriales bacterium].        | GCA_017304765.1 |
| MBN8904954.1 | TPR+GreAB-C+PIN*→ REase→                            | TPR+GreAB-C+PIN           | 679  | J0H57_28395 | Alphaproteobacteria | Rhodospirillales bacterium        | MAG: hypothetical protein J0H57_28395, partial [Rhodospirillales bacterium]. | GCA_017305035.1 |
| MBN8956855.1 | REase+TPR+TPR+GreAB-C+PIN*→                         | REase+TPR+TPR+GreAB-C+PIN | 1322 | J0H17_09800 | Alphaproteobacteria | Rhizobiales bacterium             | MAG: GreA/GreB family elongation factor [Rhizobiales bacterium].             | GCA_017304555.1 |
| MBN8979284.1 | TPR+GreAB-C+PIN*→                                   | TPR+GreAB-C+PIN           | 1129 | J0I08_22735 | Alphaproteobacteria | Rhizobiales bacterium             | MAG: hypothetical protein J0I08_22735 [Rhizobiales bacterium].               | GCA_017305555.1 |
| MBN9409395.1 | REase+TPR+GreAB-C+PIN*→                             | REase+TPR+GreAB-C+PIN     | 1520 | J0H69_09625 | Betaproteobacteria  | Burkholderiales bacterium         | MAG: hypothetical protein J0H69_09625 [Burkholderiales bacterium].           | GCA_017307855.1 |
| MBN9598737.1 | TIR→?→?→ TPR+GreAB-C+PIN*→                          | TPR+GreAB-C+PIN           | 1117 | J0G28_03540 | Alphaproteobacteria | Afipia sp.                        | MAG: hypothetical protein J0G28_03540 [Afipia sp.].                          | GCA_017308625.1 |
| MBO1224632.1 | TPR+GreAB-C+PIN*→                                   | TPR+GreAB-C+PIN           | 1279 | JYX80_09380 | Planctomycetes      | Candidatus Scalindua sediminis    | MAG: hypothetical protein JYX80_09380 [Candidatus Scalindua sediminis].      | GCA_017368835.1 |
| MBO5183033.1 | TPR+GreAB-C+PIN*→                                   | TPR+GreAB-C+PIN           | 1061 | J6B64_01405 | Firmicutes          | Bacilli bacterium                 | MAG: hypothetical protein J6B64_01405 [Bacilli bacterium].                   | GCA_017623135.1 |
| MBO5920175.1 | TPR+GreAB-C+PIN*→                                   | TPR+GreAB-C+PIN           | 507  | J6Q34_06770 | Bacteroidetes       | Bacteroidales bacterium           | MAG: hypothetical protein J6Q34_06770, partial [Bacteroidales bacterium].    | GCA_017631435.1 |
| MBO6496597.1 | TPR+GreAB-C+PIN*→                                   | TPR+GreAB-C+PIN           | 1166 | JJ978_13575 | Bacteroidetes       | Roseivirga sp.                    | MAG: hypothetical protein JJ978_13575 [Roseivirga sp.].                      | GCA_017640405.1 |
| MBO6761342.1 | TPR+GreAB-C+PIN*→                                   | TPR+GreAB-C+PIN           | 1095 | JJ909_10290 | Bacteroidetes       | Roseivirga sp.                    | MAG: hypothetical protein JJ909_10290, partial [Roseivirga sp.].             | GCA_017643085.1 |
| MBO7636147.1 | TPR+GreAB-C+PIN*→                                   | TPR+GreAB-C+PIN           | 1171 | J6S89_06175 | Bacteroidetes       | Paludibacteraceae bacterium       | MAG: hypothetical protein J6S89_06175 [Paludibacteraceae bacterium].         | GCA_017651825.1 |

| acc          | operon                               | architecture                       | len  | gen.name    | taxend              | species                                            | define                                                                                          | gca             |
|--------------|--------------------------------------|------------------------------------|------|-------------|---------------------|----------------------------------------------------|-------------------------------------------------------------------------------------------------|-----------------|
| MBP8894107.1 | TPR+GreAB-C+PIN*→                    | TPR+GreAB-C+PIN                    | 985  | KBH09_17290 | Bacteroidetes       | Saprosiraceae bacterium                            | MAG: hypothetical protein KBH09_17290 [Saprosiraceae bacterium].                                | GCA_018055665.1 |
| MBR7522021.1 | HetE-N1→ TPR+GreAB-C+PIN*→           | TPR+GreAB-C+PIN                    | 1105 | KC233_15980 | Gammaproteobacteria | Pseudomonas juntendi                               | hypothetical protein KC233_15980 [Pseudomonas juntendi].                                        | GCA_018138545.1 |
| MHJ03184.1   | TPR+GreAB-C+PIN*→                    | TPR+GreAB-C+PIN                    | 523  | EEN62_25195 | Gammaproteobacteria | Salmonella enterica                                | hypothetical protein EEN62_25195 [Salmonella enterica].                                         | GCA_003786665.1 |
| MKC77438.1   | TPR+GreAB-C+PIN*→?→   <-Trypsin      | TPR+GreAB-C+PIN                    | 1057 | D1800_22940 | Gammaproteobacteria | Salmonella enterica subsp. enterica serovar Denver | hypothetical protein D1800_22940, partial [Salmonella enterica subsp. enterica serovar Denver]. | GCA_003891855.1 |
| MPS34312.1   | REase+TPR+GreAB-C+PIN*→              | REase+TPR+GreAB-C+PIN              | 1237 | E2593_03230 | Gammaproteobacteria | Stenotrophomonas sp.                               | MAG: hypothetical protein E2593_03230 [Stenotrophomonas sp.].                                   | GCA_009360425.1 |
| MSW50706.1   | TPR+PIN*→                            | TPR+PIN                            | 1289 | F2817_07440 | Actinobacteria      | Actinobacteria bacterium                           | MAG: hypothetical protein F2817_07440 [Actinobacteria bacterium].                               | GCA_009699505.1 |
| MTI67851.1   | TPR+GreAB-C+PIN*→                    | TPR+GreAB-C+PIN                    | 1274 | FH753_14795 | Firmicutes          | Firmicutes bacterium                               | MAG: hypothetical protein FH753_14795 [Firmicutes bacterium].                                   | GCA_009711765.1 |
| MVM42293.1   | -                                    | -                                  | 400  | GO730_39050 | Bacteroidetes       | Spirosoma sp. HMF3257                              | hypothetical protein GO730_39050 [Spirosoma sp. HMF3257].                                       | GCA_009754885.1 |
| MXP30641.1   | REase→?→ REase+TPR+GreAB-C+PIN*→     | REase+TPR+GreAB-C+PIN              | 1265 | GRI94_02255 | Alphaproteobacteria | Parerythrobacter jejuensis                         | hypothetical protein GRI94_02255 [Parerythrobacter jejuensis].                                  | GCA_009827995.1 |
| MXW27298.1   | REase+TPR+GREAB-C+PIN*→              | REase+TPR+GREAB-C+PIN              | 1302 | F4Z80_00100 | Chloroflexi         | Chloroflexi bacterium                              | MAG: hypothetical protein F4Z80_00100 [Chloroflexi bacterium].                                  | GCA_009835825.1 |
| MXX46821.1   | TPR+GreAB-C+PIN*→                    | TPR+GreAB-C+PIN                    | 1267 | F4Z38_00735 | Chloroflexi         | Chloroflexi bacterium                              | MAG: tetratricopeptide repeat protein [Chloroflexi bacterium].                                  | GCA_009836695.1 |
| MXX90812.1   | SFI-Helicase+REase+TPR+GreAB-C+PIN*→ | SFI-Helicase+REase+TPR+GreAB-C+PIN | 1846 | F4Y68_16490 | Alphaproteobacteria | Boseongicola sp. SB0665_bin_10                     | MAG: DUF4011 domain-containing protein [Boseongicola sp. SB0665_bin_10].                        | GCA_009838075.1 |
| MXX91940.1   | GreAB*→?→?→ DAGKIN→                  | GreAB                              | 297  | F4Y63_00605 | Chloroflexi         | Chloroflexi bacterium                              | MAG: transcription elongation factor GreA [Chloroflexi bacterium].                              | GCA_009838175.1 |
| MXX97366.1   | REase+TPR+GreAB-C+PIN*→              | REase+TPR+GreAB-C+PIN              | 1278 | F4Y64_07095 | Bacteroidetes       | Rhodothermaceae bacterium                          | MAG: hypothetical protein F4Y64_07095 [Rhodothermaceae bacterium].                              | GCA_009838195.1 |
| MXZ48148.1   | REase+TPR+GreAB-C+PIN*→              | REase+TPR+GreAB-C+PIN              | 1281 | F4Z13_02660 | Bacteria            | Candidatus Dadabacteria bacterium                  | MAG: hypothetical protein F4Z13_02660 [Candidatus Dadabacteria bacterium].                      | GCA_009837205.1 |
| MXZ55165.1   | REase+TPR+GreAB-C+PIN*→              | REase+TPR+GreAB-C+PIN              | 1297 | F4Z14_03240 | Gammaproteobacteria | Gammaproteobacteria bacterium                      | MAG: hypothetical protein F4Z14_03240 [Gammaproteobacteria bacterium].                          | GCA_009837185.1 |
| MXZ61096.1   | REase+TPR+GreAB-C+PIN*→              | REase+TPR+GreAB-C+PIN              | 1297 | F4Z12_09585 | Acidobacteria       | Acidobacteria bacterium                            | MAG: hypothetical protein F4Z12_09585 [Acidobacteria bacterium].                                | GCA_009837215.1 |
| MYA00894.1   | TPR+GreAB-C+PIN*→                    | TPR+GreAB-C+PIN                    | 1267 | F4Y35_03835 | Chloroflexi         | Chloroflexi bacterium                              | MAG: tetratricopeptide repeat protein [Chloroflexi bacterium].                                  | GCA_009838735.1 |
| MYA68860.1   | TPR+GreAB-C+PIN*→                    | TPR+GreAB-C+PIN                    | 1308 | F4Y19_01960 | Bacteria            | Candidatus Poribacteria bacterium                  | MAG: tetratricopeptide repeat protein [Candidatus Poribacteria bacterium].                      | GCA_009839085.1 |
| MYB15443.1   | TPR+GreAB-C+PIN*→                    | TPR+GreAB-C+PIN                    | 1263 | F4X41_00185 | Chloroflexi         | Chloroflexi bacterium                              | MAG: hypothetical protein F4X41_00185 [Chloroflexi bacterium].                                  | GCA_009840625.1 |
| MYB42498.1   | TPR+GreAB-C+PIN*→                    | TPR+GreAB-C+PIN                    | 1283 | F4X76_09995 | Chloroflexi         | Chloroflexi bacterium                              | MAG: tetratricopeptide repeat protein [Chloroflexi bacterium].                                  | GCA_009839925.1 |
| MYB43588.1   | TPR+PIN*→                            | TPR+PIN                            | 1200 | F4X74_01405 | Actinobacteria      | Acidimicrobia bacterium                            | MAG: hypothetical protein F4X74_01405 [Acidimicrobia bacterium].                                | GCA_009839965.1 |
| MYB75895.1   | TPR+GreAB-C+PIN*→                    | TPR+GreAB-C+PIN                    | 1300 | F4X83_02110 | Chloroflexi         | Chloroflexi bacterium                              | MAG: hypothetical protein F4X83_02110 [Chloroflexi bacterium].                                  | GCA_009839775.1 |
| MYC64541.1   | TPR+GreAB-C+PIN*→                    | TPR+GreAB-C+PIN                    | 1258 | F4X16_17195 | Chloroflexi         | Caldilineaceae bacterium SB0661_bin_34             | MAG: tetratricopeptide repeat protein [Caldilineaceae bacterium SB0661_bin_34].                 | GCA_009841145.1 |
| MYD93275.1   | REase+TPR+GreAB-C+PIN*→              | REase+TPR+GreAB-C+PIN              | 1302 | F4Y02_06215 | Chloroflexi         | Chloroflexi bacterium                              | MAG: hypothetical protein F4Y02_06215 [Chloroflexi bacterium].                                  | GCA_009839425.1 |

| acc        | operon                                                                                                                       | architecture              | len  | gen.name     | taxend                | species                                  | define                                                                              | gca             |
|------------|------------------------------------------------------------------------------------------------------------------------------|---------------------------|------|--------------|-----------------------|------------------------------------------|-------------------------------------------------------------------------------------|-----------------|
| MYE61432.1 | TPR+GreAB-C+PIN*→                                                                                                            | TPR+GreAB-C+PIN           | 638  | F4235_05210  | Bacteria              | Candidatus Dadabacteria bacterium        | MAG: GreA/GreB family elongation factor [Candidatus Dadabacteria bacterium].        | GCA_009841925.1 |
| MYF79095.1 | TPR+GreAB-C+PIN*→                                                                                                            | TPR+GreAB-C+PIN           | 716  | F4180_04215  | Chloroflexi           | Chloroflexi bacterium                    | MAG: tetratricopeptide repeat protein, partial [Chloroflexi bacterium].             | GCA_009843025.1 |
| MYH48359.1 | TPR+GreAB-C+PIN*→                                                                                                            | TPR+GreAB-C+PIN           | 1248 | F4151_02205  | Gammaproteobacteria   | Gammaproteobacteria bacterium            | MAG: hypothetical protein F4151_02205 [Gammaproteobacteria bacterium].              | GCA_009843625.1 |
| MYK18704.1 | TPR+GreAB-C+PIN*→                                                                                                            | TPR+GreAB-C+PIN           | 911  | F4055_11145  | Bacteria              | Candidatus Poribacteria bacterium        | MAG: tetratricopeptide repeat protein, partial [Candidatus Poribacteria bacterium]. | GCA_009845505.1 |
| MYK96751.1 | TPR+GreAB-C+PIN*→                                                                                                            | TPR+GreAB-C+PIN           | 470  | F4009_22610  | Bacteria              | Candidatus Poribacteria bacterium        | MAG: hypothetical protein F4009_22610 [Candidatus Poribacteria bacterium].          | GCA_009846415.1 |
| NAT27530.1 | TPR+GreAB-C+PIN*→                                                                                                            | TPR+GreAB-C+PIN           | 692  | CVE22_06655  | Gammaproteobacteria   | Pseudomonas syringae pv. actinidiae      | hypothetical protein CVE22_06655, partial [Pseudomonas syringae pv. actinidiae].    | GCA_009903115.1 |
| NBW14976.1 | REase+TPR+GreAB-C+PIN*→                                                                                                      | REase+TPR+GreAB-C+PIN     | 1102 | EBR82_43945  | Alphaproteobacteria   | Caulobacteraceae bacterium               | MAG: hypothetical protein EBR82_43945, partial [Caulobacteraceae bacterium].        | GCA_009924585.1 |
| NCC04365.1 | REase+TPR+GreAB-C+PIN*→                                                                                                      | REase+TPR+GreAB-C+PIN     | 1308 | EOM37_10050  | Proteobacteria        | Proteobacteria bacterium                 | MAG: tetratricopeptide repeat protein [Proteobacteria bacterium].                   | GCA_009929575.1 |
| NCN59296.1 | <-CITB-HTH+LexA-protease  TPR+GreAB-C+PIN*→                                                                                  | TPR+GreAB-C+PIN           | 1274 | GW940_05255  | Bacteria              | Candidatus Microgenomates bacterium      | MAG: hypothetical protein GW940_05255 [Candidatus Microgenomates bacterium].        | GCA_009992065.1 |
| NCO24709.1 | TPR+GreAB-C+PIN*→                                                                                                            | TPR+GreAB-C+PIN           | 415  | GW897_06315  | unclassified Bacteria | bacterium                                | MAG: hypothetical protein GW897_06315 [bacterium].                                  | GCA_009992775.1 |
| NEZ58684.1 | TPR+TPR→ TPR+TPR→ TPR+TPR→ TPR+TPR→ TPR+TPR→ TPR→ TPR→ PNPase+TPR+GreAB-C+PIN*→?→   <-TPR+TPR                                | PNPase+TPR+GreAB-C+PIN    | 1392 | DXZ20_24195  | Cyanobacteria         | Leptolyngbyaceae cyanobacterium CCMR0081 | hypothetical protein DXZ20_24195 [Leptolyngbyaceae cyanobacterium CCMR0081].        | GCA_011009555.1 |
| NEZ64367.1 | TPR+TPR→ TPR+TPR→ TPR+TPR→ TPR+TPR→ TPR+TPR→ TPR+TPR→ TPR+TPR→ PNPase+TPR+GreAB-C+PIN*→?→   <-TPR+TPR<-TPR+TPR<-?<-TIR PIN*→ | PNPase+TPR+GreAB-C+PIN    | 1392 | D0962_16475  | Cyanobacteria         | Leptolyngbyaceae cyanobacterium CCMR0082 | hypothetical protein D0962_16475 [Leptolyngbyaceae cyanobacterium CCMR0082].        | GCA_011009535.1 |
| NHI06604.1 |                                                                                                                              | PIN                       | 211  | STPH2_1967   | Actinobacteria        | Streptomyces sp. KO7888                  | hypothetical protein STPH2_1967 [Streptomyces sp. KO7888].                          | GCA_011317205.1 |
| NHK99992.1 | TPR+GreAB-C+PIN*→                                                                                                            | TPR+GreAB-C+PIN           | 911  | G7087_16540  | Betaproteobacteria    | Rubrivivax benzoatilyticus               | hypothetical protein G7087_16540 [Rubrivivax benzoatilyticus].                      | GCA_011365705.1 |
| NJN11600.1 | TPR+GreAB-C+PIN*→                                                                                                            | TPR+GreAB-C+PIN           | 298  | HC815_27960  | Cyanobacteria         | Richelia sp. RM1_1_1                     | MAG: hypothetical protein HC815_27960 [Richelia sp. RM1_1_1].                       | GCA_012032385.1 |
| NJO54209.1 | REase+TPR+TPR+GreAB-C+PIN*→                                                                                                  | REase+TPR+TPR+GreAB-C+PIN | 1338 | HC829_04580  | Bacteroidetes         | Bacteroidales bacterium                  | MAG: hypothetical protein HC829_04580 [Bacteroidales bacterium].                    | GCA_012033435.1 |
| NKI94745.1 | REase+TPR+GreAB-C+PIN*→                                                                                                      | REase+TPR+GreAB-C+PIN     | 1340 | FHT26_002685 | Betaproteobacteria    | Rhizobacter sp. SG703                    | tetratricopeptide (TPR) repeat protein [Rhizobacter sp. SG703].                     | GCA_012275445.1 |
| NLD36189.1 | REase+TPR+PIN*→                                                                                                              | REase+TPR+PIN             | 1360 | GX654_04895  | Deltaproteobacteria   | Desulfatiglans sp.                       | MAG: tetratricopeptide repeat protein [Desulfatiglans sp.].                         | GCA_012513605.1 |
| NLD38959.1 | TPR+PIN*→                                                                                                                    | TPR+PIN                   | 1143 | GX654_19035  | Deltaproteobacteria   | Desulfatiglans sp.                       | MAG: tetratricopeptide repeat protein [Desulfatiglans sp.].                         | GCA_012513605.1 |
| NLD90744.1 | PNPase+TPR+GreAB-C+PIN*→                                                                                                     | PNPase+TPR+GreAB-C+PIN    | 1613 | GX634_10460  | Lentisphaerae         | Lentisphaerae bacterium                  | MAG: hypothetical protein GX634_10460 [Lentisphaerae bacterium].                    | GCA_012514035.1 |
| NLE27049.1 | SIR2+TPR+GreAB-C+PIN*→                                                                                                       | SIR2+TPR+GreAB-C+PIN      | 1448 | GX625_17245  | Firmicutes            | Clostridiaceae bacterium                 | MAG: hypothetical protein GX625_17245 [Clostridiaceae bacterium].                   | GCA_012514215.1 |
| NLE28033.1 | TPR+GreAB-C+PIN*→                                                                                                            | TPR+GreAB-C+PIN           | 758  | GX625_22395  | Firmicutes            | Clostridiaceae bacterium                 | MAG: hypothetical protein GX625_22395, partial [Clostridiaceae bacterium].          | GCA_012514215.1 |
| NLG15547.1 | TPR+GreAB-C+PIN*→                                                                                                            | TPR+GreAB-C+PIN           | 1341 | GX561_15255  | Lentisphaerae         | Lentisphaerae bacterium                  | MAG: hypothetical protein GX561_15255 [Lentisphaerae bacterium].                    | GCA_012515425.1 |
| NLX50682.1 | REase+TPR+GreAB-C+PIN*→ PSE→?→?→ REase+SNF2→                                                                                 | REase+TPR+GreAB-C+PIN     | 1299 | GXY72_01105  | Deltaproteobacteria   | Deltaproteobacteria bacterium            | MAG: hypothetical protein GXY72_01105 [Deltaproteobacteria bacterium].              | GCA_012729055.1 |
| NMQ30291.1 | REase+TPR+GreAB-C+PIN*→                                                                                                      | REase+TPR+GreAB-C+PIN     | 1072 | E4Q23_22545  | Betaproteobacteria    | Candidatus Accumulibacter phosphatis     | hypothetical protein E4Q23_22545, partial [Candidatus Accumulibacter phosphatis].   | GCA_012939955.1 |
| NOT34484.1 | GreAB*→                                                                                                                      | GreAB                     | 904  | HOP12_09975  | Bacteria              | Candidatus Eisenbacteria bacterium       | MAG: hypothetical protein HOP12_09975 [Candidatus Eisenbacteria bacterium].         | GCA_013140805.1 |

| acc        | operon                         | architecture              | len  | gen.name    | taxend              | species                                                    | define                                                                                              | gca             |
|------------|--------------------------------|---------------------------|------|-------------|---------------------|------------------------------------------------------------|-----------------------------------------------------------------------------------------------------|-----------------|
| NOU31123.1 | TPR+GreAB-C+PIN*→              | TPR+GreAB-C+PIN           | 536  | HOO96_24755 | Deltaproteobacteria | Polyangiaceae bacterium                                    | MAG: hypothetical protein HOO96_24755 [Polyangiaceae bacterium].                                    | GCA_013141295.1 |
| NQE54029.1 | REase+TPR+GreAB-C+PIN*→        | REase+TPR+GreAB-C+PIN     | 1291 | lapB_1      | Euryarchaeota       | ANME-1 cluster archaeon GoMg3.2                            | Lipopolysaccharide assembly protein B [ANME-1 cluster archaeon GoMg3.2].                            | GCA_013180565.1 |
| NQV22738.1 | REase+TPR+GreAB-C+PIN*→        | REase+TPR+GreAB-C+PIN     | 1245 | HQ518_00080 | Planctomycetes      | Rhodopirellula sp.                                         | MAG: hypothetical protein HQ518_00080 [Rhodopirellula sp.].                                         | GCA_013203845.1 |
| NQY79025.1 | TPR+PIN*→                      | TPR+PIN                   | 1272 | HRT47_01810 | Terrabacteria group | Candidatus Caenarcaniphilales bacterium                    | MAG: hypothetical protein HRT47_01810 [Candidatus Caenarcaniphilales bacterium].                    | GCA_013216135.1 |
| NQZ35237.1 | TPR+GreAB-C+PIN*→              | TPR+GreAB-C+PIN           | 1069 | HRT58_06210 | Bacteroidetes       | Crocinitomicaceae bacterium                                | MAG: hypothetical protein HRT58_06210 [Crocinitomicaceae bacterium].                                | GCA_013214785.1 |
| NQZ40471.1 | HetE-N1→ TPR+GreAB-C+PIN*→     | TPR+GreAB-C+PIN           | 1088 | HRT96_10385 | Gammaproteobacteria | Moritella sp.                                              | MAG: hypothetical protein HRT96_10385 [Moritella sp.].                                              | GCA_013215705.1 |
| NSZ07544.1 | TPR+GreAB-C+PIN*→              | TPR+GreAB-C+PIN           | 1180 | G6M14_14320 | Alphaproteobacteria | Agrobacterium tumefaciens                                  | hypothetical protein G6M14_14320 [Agrobacterium tumefaciens].                                       | GCA_013318315.1 |
| NTV22000.1 | TPR+PIN*→                      | TPR+PIN                   | 942  | HGB03_00315 | Bacteria            | Candidatus Yonathbacteria bacterium                        | MAG: hypothetical protein HGB03_00315 [Candidatus Yonathbacteria bacterium].                        | GCA_013334825.1 |
| NTW26872.1 | REase→ REase+TPR+GreAB-C+PIN*→ | REase+TPR+GreAB-C+PIN     | 1310 | HGA36_00950 | Bacteria            | Candidatus Moranbacteria bacterium                         | MAG: hypothetical protein HGA36_00950 [Candidatus Moranbacteria bacterium].                         | GCA_013336225.1 |
| NTZ52560.1 | HetE-N1→?→ TPR+GreAB-C+PIN*→   | TPR+GreAB-C+PIN           | 513  | FCH32_20020 | Gammaproteobacteria | Citrobacter gillenii                                       | hypothetical protein FCH32_20020 [Citrobacter gillenii].                                            | GCA_013337685.1 |
| NWE92806.1 | PIN*→                          | PIN                       | 344  | HX893_32300 | Gammaproteobacteria | Pseudomonas reactans                                       | hypothetical protein HX893_32300, partial [Pseudomonas reactans].                                   | GCA_013386215.1 |
| NWO07476.1 | HetE-N1→ TPR+GreAB-C+PIN*→     | TPR+GreAB-C+PIN           | 1130 | HLX50_17830 | Gammaproteobacteria | Alteromonadaceae bacterium                                 | MAG: hypothetical protein HLX50_17830 [Alteromonadaceae bacterium].                                 | GCA_013393545.1 |
| OBH13398.1 | X+PIN*→                        | X+PIN                     | 755  | A5695_13915 | Actinobacteria      | Mycobacterium sp. E1747                                    | hypothetical protein A5695_13915 [Mycobacterium sp. E1747].                                         | GCA_001667775.1 |
| OBR53101.1 | REase+TPR+GreAB-C+PIN*→        | REase+TPR+GreAB-C+PIN     | 1277 | A6456_09045 | Betaproteobacteria  | Paraburkholderia tropica                                   | hypothetical protein A6456_09045 [Paraburkholderia tropica].                                        | GCA_001673675.1 |
| OCX17561.1 | REase+TPR+TPR+GreAB-C+PIN*→    | REase+TPR+TPR+GreAB-C+PIN | 1207 | QV13_12440  | Alphaproteobacteria | Mesorhizobium hungaricum                                   | hypothetical protein QV13_12440 [Mesorhizobium hungaricum].                                         | GCA_001705425.1 |
| ODM45291.1 | TPR+GreAB-C+PIN*→              | TPR+GreAB-C+PIN           | 1187 | A9320_11670 | Alphaproteobacteria | Ruegeria sp. PBVC088                                       | hypothetical protein A9320_11670 [Ruegeria sp. PBVC088].                                            | GCA_001717995.1 |
| ODS63626.1 | GreAB-C+PIN*→                  | GreAB-C+PIN               | 516  | ABS37_11570 | Betaproteobacteria  | Acidovorax sp. SCN 65-108                                  | MAG: hypothetical protein ABS37_11570 [Acidovorax sp. SCN 65-108].                                  | GCA_001724055.1 |
| ODT73806.1 | REase+TPR+TPR+GreAB-C+PIN*→    | REase+TPR+TPR+GreAB-C+PIN | 1296 | ABS76_38455 | Alphaproteobacteria | Pelagibacterium sp. SCN 64-44                              | MAG: hypothetical protein ABS76_38455 [Pelagibacterium sp. SCN 64-44].                              | GCA_001724955.1 |
| OEJ21925.1 | REase+PIN*→                    | REase+PIN                 | 1260 | AR457_38995 | Actinobacteria      | Streptomyces agglomeratus                                  | hypothetical protein AR457_38995 [Streptomyces agglomeratus].                                       | GCA_001746465.1 |
| OFX87846.1 | TPR+GreAB-C+PIN*→              | TPR+GreAB-C+PIN           | 1236 | A2X00_15495 | Bacteroidetes       | Bacteroidetes bacterium GWE2_32_14                         | MAG: hypothetical protein A2X00_15495 [Bacteroidetes bacterium GWE2_32_14].                         | GCA_001768405.1 |
| OFY15991.1 | TPR+GreAB-C+PIN*→              | TPR+GreAB-C+PIN           | 1237 | A2X02_04985 | Bacteroidetes       | Bacteroidetes bacterium GWF2_29_10                         | MAG: hypothetical protein A2X02_04985 [Bacteroidetes bacterium GWF2_29_10].                         | GCA_001768555.1 |
| OGC02499.1 | PIN*→                          | PIN                       | 178  | A2V82_02050 | Bacteria            | candidate division KSB1 bacterium RBG_16_48_16             | MAG: hypothetical protein A2V82_02050 [candidate division KSB1 bacterium RBG_16_48_16].             | GCA_001771235.1 |
| OGH88116.1 | TPR+GreAB-C+PIN*→              | TPR+GreAB-C+PIN           | 1191 | A3J93_00010 | Bacteria            | Candidatus Magasanikbacteria bacterium RIFOXYC2_FULL_42_28 | MAG: hypothetical protein A3J93_00010 [Candidatus Magasanikbacteria bacterium RIFOXYC2_FULL_42_28]. | GCA_001784435.1 |
| OGI36016.1 | TRD+TRD→?→?→?→ TPR+PIN*→       | TPR+PIN                   | 1186 | A2259_01680 | Bacteria            | Candidatus Moranbacteria bacterium RIFOXYA2_FULL_43_15     | MAG: hypothetical protein A2259_01680 [Candidatus Moranbacteria bacterium RIFOXYA2_FULL_43_15].     | GCA_001784835.1 |

| acc        | operon                                      | architecture              | len  | gen.name    | taxend              | species                                                                   | define                                                                                                             | gca             |
|------------|---------------------------------------------|---------------------------|------|-------------|---------------------|---------------------------------------------------------------------------|--------------------------------------------------------------------------------------------------------------------|-----------------|
| OGS08035.1 | TPR+GreAB-C+PIN*→                           | TPR+GreAB-C+PIN           | 1270 | A2270_03040 | Elusimicrobia       | Elusimicrobia bacterium RIFOXYA12_FULL_51_18                              | MAG: hypothetical protein A2270_03040 [Elusimicrobia bacterium RIFOXYA12_FULL_51_18].                              | GCA_001800245.1 |
| OGU66359.1 | REase+TPR+GreAB-C+PIN*→                     | REase+TPR+GreAB-C+PIN     | 1303 | A2W30_02620 | Ignavibacteriae     | Ignavibacteria bacterium RBG_16_36_9                                      | MAG: hypothetical protein A2W30_02620 [Ignavibacteria bacterium RBG_16_36_9].                                      | GCA_001802895.1 |
| OGU77131.1 | PIN*→                                       | PIN                       | 573  | A2W11_11280 | Ignavibacteriae     | Ignavibacteria bacterium RBG_16_35_7                                      | MAG: hypothetical protein A2W11_11280 [Ignavibacteria bacterium RBG_16_35_7].                                      | GCA_001802885.1 |
| OIP66815.1 | TPR+GreAB-C+PIN*→                           | TPR+GreAB-C+PIN           | 402  | AUK42_07760 | Bacteria            | Candidatus Atribacteria bacterium CG2_30_33_13                            | MAG: hypothetical protein AUK42_07760 [Candidatus Atribacteria bacterium CG2_30_33_13].                            | GCA_001873345.1 |
| OJV65414.1 | HetE-N1→ HetE-N1+TPR+GreAB-C+PIN*→          | HetE-N1+TPR+GreAB-C+PIN   | 1117 | BGO35_21125 | Betaproteobacteria  | Burkholderiales bacterium 64-34                                           | MAG: hypothetical protein BGO35_21125 [Burkholderiales bacterium 64-34].                                           | GCA_001897585.1 |
| OJW35018.1 | TPR+GreAB-C+PIN*→   <-REase                 | TPR+GreAB-C+PIN           | 1246 | BGO54_02365 | Bacteroidetes       | Sphingobacteriales bacterium 46-32                                        | MAG: hypothetical protein BGO54_02365 [Sphingobacteriales bacterium 46-32].                                        | GCA_001898485.1 |
| OJW61617.1 | TIR→?→?→ TPR+GreAB-C+PIN*→                  | TPR+GreAB-C+PIN           | 1114 | BGO65_09490 | Alphaproteobacteria | Afipia sp. 64-13                                                          | MAG: hypothetical protein BGO65_09490 [Afipia sp. 64-13].                                                          | GCA_001897755.1 |
| OMR67119.1 | TPR+GreAB-C+PIN*→   <-HTH+HTH               | TPR+GreAB-C+PIN           | 879  | AQ727_25970 | Betaproteobacteria  | Burkholderia pseudomallei                                                 | hypothetical protein AQ727_25970 [Burkholderia pseudomallei].                                                      | GCA_001976575.1 |
| OSN14318.1 | REase+TPR+GreAB-C+PIN*→                     | REase+TPR+GreAB-C+PIN     | 1486 | BV340_04459 | Gammaproteobacteria | Pseudomonas syringae pv. actinidiae                                       | hypothetical protein BV340_04459 [Pseudomonas syringae pv. actinidiae].                                            | GCA_002111665.1 |
| OSN30099.1 | REase+TPR+GreAB-C+PIN*→                     | REase+TPR+GreAB-C+PIN     | 1336 | BV342_05184 | Gammaproteobacteria | Pseudomonas syringae pv. actinidiae                                       | hypothetical protein BV342_05184 [Pseudomonas syringae pv. actinidiae].                                            | GCA_002111745.1 |
| OUC14796.1 | TPR+TPR+PNPase→ PNPase+TPR+GreAB-C+PIN*→    | PNPase+TPR+GreAB-C+PIN    | 1396 | B0A82_10750 | Cyanobacteria       | Alkalinema sp. CACIAM 70d                                                 | MAG: hypothetical protein B0A82_10750 [Alkalinema sp. CACIAM 70d].                                                 | GCA_002148405.1 |
| OUR78422.1 | TPR+GreAB-C+PIN*→                           | TPR+GreAB-C+PIN           | 1191 | A9Q83_07770 | Alphaproteobacteria | Alphaproteobacteria bacterium 46_93_T64                                   | hypothetical protein A9Q83_07770 [Alphaproteobacteria bacterium 46_93_T64].                                        | GCA_002163135.1 |
| OWZ89184.1 | REase+TPR+TPR+GreAB-C+PIN*→                 | REase+TPR+TPR+GreAB-C+PIN | 1352 | B9J07_34245 | Alphaproteobacteria | Sinorhizobium sp. LM21                                                    | hypothetical protein B9J07_34245 [Sinorhizobium sp. LM21].                                                         | GCA_002216665.1 |
| OYD66813.1 | REase+TPR+GreAB-C+PIN*→?→ Trypsin→          | REase+TPR+GreAB-C+PIN     | 1243 | BDB13_0310  | Actinobacteria      | Rhodococcus sp. OK302                                                     | uncharacterized protein DUF4365 [Rhodococcus sp. OK302].                                                           | GCA_002245895.1 |
| OYW86349.1 | TPR+GreAB-C+PIN*→                           | TPR+GreAB-C+PIN           | 629  | B7Z22_06790 | Alphaproteobacteria | Hyphomonas sp. 32-62-5                                                    | MAG: hypothetical protein B7Z22_06790, partial [Hyphomonas sp. 32-62-5].                                           | GCA_002280065.1 |
| OYX15563.1 | REase+TPR+GreAB-C+PIN*→                     | REase+TPR+GreAB-C+PIN     | 1211 | B7Z15_00100 | Alphaproteobacteria | Rhizobiales bacterium 32-66-8                                             | MAG: hypothetical protein B7Z15_00100 [Rhizobiales bacterium 32-66-8].                                             | GCA_002280205.1 |
| OZB15488.1 | REase+TPR+GreAB-C+PIN*→                     | REase+TPR+GreAB-C+PIN     | 1294 | B7X53_11340 | Alphaproteobacteria | Hyphomonas sp. 34-62-18                                                   | MAG: hypothetical protein B7X53_11340 [Hyphomonas sp. 34-62-18].                                                   | GCA_002282565.1 |
| PBC66280.1 | X+PIN*→                                     | X+PIN                     | 685  | BX265_8343  | Actinobacteria      | Streptomyces sp. TLI_235                                                  | hypothetical protein BX265_8343 [Streptomyces sp. TLI_235].                                                        | GCA_002300355.1 |
| PCJ29538.1 | REase+TPR+PIN*→                             | REase+TPR+PIN             | 1292 | COA99_19375 | Gammaproteobacteria | Moraxellaceae bacterium                                                   | MAG: hypothetical protein COA99_19375 [Moraxellaceae bacterium].                                                   | GCA_002402125.1 |
| PDQ17661.1 | REase+TPR+TPR+GreAB-C+PIN*→                 | REase+TPR+TPR+GreAB-C+PIN | 1265 | CN311_28810 | Alphaproteobacteria | Mesorhizobium sanjuanii                                                   | hypothetical protein CN311_28810 [Mesorhizobium sanjuanii].                                                        | GCA_002529485.1 |
| PGS40120.1 | TPR+PIN*→                                   | TPR+PIN                   | 1006 | COC58_18130 | Firmicutes          | Bacillus cereus                                                           | hypothetical protein COC58_18130 [Bacillus cereus].                                                                | GCA_002577165.1 |
| PIG41510.1 | TPR+PIN*→                                   | TPR+PIN                   | 1214 | CLZ78_0083  | Actinobacteria      | Streptomyces sp. 61                                                       | hypothetical protein CLZ78_0083 [Streptomyces sp. 61].                                                             | GCA_002754535.1 |
| PIP62053.1 | <-CITB-HTH+LexA-protease  TPR+GreAB-C+PIN*→ | TPR+GreAB-C+PIN           | 1272 | COW99_00715 | Bacteria            | Candidatus Roizmanbacteria bacterium CG22_combo_CG10-13_8_21_14_all_38_20 | MAG: hypothetical protein COW99_00715 [Candidatus Roizmanbacteria bacterium CG22_combo_CG10-13_8_21_14_all_38_20]. | GCA_002786635.1 |
| PIU06549.1 | TPR+GreAB-C+PIN*→                           | TPR+GreAB-C+PIN           | 1132 | COT56_09580 | Alphaproteobacteria | Methylobacterium sp. CG09_land_8_20_14_0_10_71_15                         | MAG: hypothetical protein COT56_09580 [Methylobacterium sp. CG09_land_8_20_14_0_10_71_15].                         | GCA_002778835.1 |

| acc        | operon                                      | architecture              | len  | gen.name     | taxend              | species                                                | define                                                                                          | gca             |
|------------|---------------------------------------------|---------------------------|------|--------------|---------------------|--------------------------------------------------------|-------------------------------------------------------------------------------------------------|-----------------|
| PKM50370.1 | TPR+PIN*→                                   | TPR+PIN                   | 1214 | CVV02_11355  | Firmicutes          | Firmicutes bacterium HGW-Firmicutes-7                  | MAG: hypothetical protein CVV02_11355 [Firmicutes bacterium HGW-Firmicutes-7].                  | GCA_002841375.1 |
| PKN75416.1 | TPR+GreAB-C+PIN*→                           | TPR+GreAB-C+PIN           | 1116 | CVU49_03915  | FCB group           | Candidatus Cloacimonetes bacterium HGW-Cloacimonetes-2 | MAG: hypothetical protein CVU49_03915 [Candidatus Cloacimonetes bacterium HGW-Cloacimonetes-2]. | GCA_002842035.1 |
| PKO82710.1 | HetE-N1→ HetE-N1+TPR+GreAB-C+PIN*→          | HetE-N1+TPR+GreAB-C+PIN   | 1126 | CVU19_00260  | Betaproteobacteria  | Betaproteobacteria bacterium HGW-Betaproteobacteria-13 | MAG: hypothetical protein CVU19_00260 [Betaproteobacteria bacterium HGW-Betaproteobacteria-13]. | GCA_002842325.1 |
| PLP59030.1 | REase+TPR+TPR+GreAB-C+PIN*→                 | REase+TPR+TPR+GreAB-C+PIN | 1226 | CYK37_11065  | Alphaproteobacteria | Mesorhizobium loti                                     | hypothetical protein CYK37_11065 [Mesorhizobium loti].                                          | GCA_002858745.1 |
| PLX86308.1 | TPR+GreAB-C+PIN*→                           | TPR+GreAB-C+PIN           | 1333 | C0617_01645  | Deltaproteobacteria | Desulfuromonas sp.                                     | MAG: hypothetical protein C0617_01645 [Desulfuromonas sp.].                                     | GCA_002868845.1 |
| PLY41243.1 | TPR+GreAB-C+PIN*→                           | TPR+GreAB-C+PIN           | 1106 | CSZ94_17070  | Betaproteobacteria  | Janthinobacterium sp. ROICE36                          | hypothetical protein CSZ94_17070 [Janthinobacterium sp. ROICE36].                               | GCA_002869965.1 |
| PMJ73057.1 | HetE-N1→?→ GreAB-C*→                        | GreAB-C                   | 461  | BCU23_16040  | Gammaproteobacteria | Vibrio splendidus                                      | hypothetical protein BCU23_16040 [Vibrio splendidus].                                           | GCA_002877525.1 |
| POU10505.1 | PIN*→                                       | PIN                       | 385  | C3420_16980  | Gammaproteobacteria | Acinetobacter sp. ACNIH3                               | hypothetical protein C3420_16980 [Acinetobacter sp. ACNIH3].                                    | GCA_002918965.1 |
| PQZ99140.1 | TPR+PIN*→                                   | TPR+PIN                   | 932  | CQ019_16410  | Actinobacteria      | Arthrobacter sp. MYb229                                | hypothetical protein CQ019_16410 [Arthrobacter sp. MYb229].                                     | GCA_002975405.1 |
| PRY64434.1 | HetE-N1→ TPR+GreAB-C+PIN*→                  | TPR+GreAB-C+PIN           | 1090 | B0H98_10595  | Gammaproteobacteria | Halomonas songnenensis                                 | hypothetical protein B0H98_10595 [Halomonas songnenensis].                                      | GCA_003002925.1 |
| PSL26440.1 | HNH+TPR+GreAB-C+PIN*→                       | HNH+TPR+GreAB-C+PIN       | 1234 | CLV42_111154 | Bacteroidetes       | Chitinophaga ginsengisoli                              | HNH endonuclease [Chitinophaga ginsengisoli].                                                   | GCA_003014595.1 |
| PTH81074.1 | TPR+GreAB-C+PIN*→                           | TPR+GreAB-C+PIN           | 851  | DAA48_11040  | Gammaproteobacteria | Aeromonas veronii                                      | hypothetical protein DAA48_11040 [Aeromonas veronii].                                           | GCA_003036425.1 |
| PTL60251.1 | X+PIN*→                                     | X+PIN                     | 1319 | C7Y72_11685  | Actinobacteria      | Conexibacter sp. Seoho-28                              | hypothetical protein C7Y72_11685 [Conexibacter sp. Seoho-28].                                   | GCA_003044185.1 |
| PTX57421.1 | TPR+GreAB-C+PIN*→                           | TPR+GreAB-C+PIN           | 1184 | C8N43_2089   | Alphaproteobacteria | Litoreibacter ponti                                    | hypothetical protein C8N43_2089 [Litoreibacter ponti].                                          | GCA_003054285.1 |
| PWM31885.1 | GreAB*→                                     | GreAB                     | 675  | DBX55_01895  | Verrucomicrobia     | Verrucomicrobia bacterium                              | MAG: transcription elongation factor GreAB [Verrucomicrobia bacterium].                         | GCA_003343565.1 |
| PWM77364.1 | NACHT→?→ X+PIN*→ HTH→                       | X+PIN                     | 733  | DBY32_08445  | Firmicutes          | Phascolarctobacterium sp.                              | MAG: hypothetical protein DBY32_08445 [Phascolarctobacterium sp.].                              | GCA_003150755.1 |
| PWM80532.1 | TPR+GreAB-C+PIN*→                           | TPR+GreAB-C+PIN           | 1185 | DBY41_05620  | Firmicutes          | Clostridium sp.                                        | MAG: hypothetical protein DBY41_05620 [Clostridium sp.].                                        | GCA_003150745.1 |
| PZR80846.1 | BirA-HTH→ HEPN→ REase+TPR+TPR+GreAB-C+PIN*→ | REase+TPR+TPR+GreAB-C+PIN | 1131 | DI537_39015  | Gammaproteobacteria | Pseudomonas stutzeri                                   | MAG: hypothetical protein DI537_39015, partial [Pseudomonas stutzeri].                          | GCA_003243385.1 |
| PZR82088.1 | TPR+GreAB-C+PIN*→                           | TPR+GreAB-C+PIN           | 1139 | DI537_37240  | Gammaproteobacteria | Pseudomonas stutzeri                                   | MAG: hypothetical protein DI537_37240 [Pseudomonas stutzeri].                                   | GCA_003243385.1 |
| PZU06315.1 | REase+TPR+GreAB-C+PIN*→                     | REase+TPR+GreAB-C+PIN     | 1323 | DI605_19340  | Alphaproteobacteria | Sphingomonas sp.                                       | MAG: hypothetical protein DI605_19340 [Sphingomonas sp.].                                       | GCA_003248515.1 |
| PZU12119.1 | TPR+GreAB-C+PIN*→                           | TPR+GreAB-C+PIN           | 859  | DI622_15520  | Bacteroidetes       | Chryseobacterium sp.                                   | MAG: hypothetical protein DI622_15520, partial [Chryseobacterium sp.].                          | GCA_003248465.1 |
| QDS92471.1 | REase+TPR+GreAB-C+PIN*→                     | REase+TPR+GreAB-C+PIN     | 1250 | FF011L_12140 | Planctomycetes      | Planctomycetes bacterium FF011L                        | hypothetical protein FF011L_12140 [Planctomycetes bacterium FF011L].                            | GCA_007741495.1 |
| QDT50511.1 | REase+TPR+GreAB-C+PIN→ TPR+GreAB-C+PIN*→    | TPR+GreAB-C+PIN           | 495  | Pan258_45900 | Planctomycetes      | Symmachiella dynata                                    | hypothetical protein Pan258_45900 [Symmachiella dynata].                                        | GCA_007744975.1 |
| QDV12361.1 | REase+TPR+GreAB-C+PIN*→                     | REase+TPR+GreAB-C+PIN     | 1246 | CA51_22440   | Planctomycetes      | Rosistilla oblonga                                     | Tetratricopeptide repeat protein [Rosistilla oblonga].                                          | GCA_007751715.1 |
| QDV84971.1 | TPR+GreAB-C+PIN*→                           | TPR+GreAB-C+PIN           | 954  | TBK1r_39230  | Planctomycetes      | Planctomycetes bacterium TBK1r                         | hypothetical protein TBK1r_39230 [Planctomycetes bacterium TBK1r].                              | GCA_007753675.1 |

| acc        | operon                                    | architecture              | len  | gen.name     | taxend              | species                                | define                                                                          | gca             |
|------------|-------------------------------------------|---------------------------|------|--------------|---------------------|----------------------------------------|---------------------------------------------------------------------------------|-----------------|
| QFS96076.1 | TPR+GreAB-C+PIN*→                         | TPR+GreAB-C+PIN           | 1184 | FIV06_01510  | Alphaproteobacteria | Labrenzia sp. THAF191b                 | hypothetical protein FIV06_01510 [Labrenzia sp. THAF191b].                      | GCA_009363315.1 |
| QHB84489.1 | HetE-N1→ TPR+GreAB-C+PIN*→                | TPR+GreAB-C+PIN           | 1094 | GIS01_21340  | Gammaproteobacteria | Aeromonas veronii                      | hypothetical protein GIS01_21340 [Aeromonas veronii].                           | GCA_009833025.1 |
| QIC10441.1 | HetE-N1→ TPR+GreAB-C+PIN*→                | TPR+GreAB-C+PIN           | 1069 | PmVP161_2026 | Gammaproteobacteria | Pasteurella multocida                  | hypothetical protein PmVP161_2026 [Pasteurella multocida].                      | GCA_011390865.1 |
| QND19257.1 | REase+TPR+TPR+GreAB-C+PIN*→               | REase+TPR+TPR+GreAB-C+PIN | 1348 | HB774_02700  | Alphaproteobacteria | Rhizobium leguminosarum bv. viciae     | hypothetical protein HB774_02700 [Rhizobium leguminosarum bv. viciae].          | GCA_014189655.1 |
| QPL52208.1 | HetE-N1→ TPR+GreAB-C+PIN*→                | TPR+GreAB-C+PIN           | 1130 | I3X05_08770  | Gammaproteobacteria | Vibrio navarrensis                     | hypothetical protein I3X05_08770 [Vibrio navarrensis].                          | GCA_015767675.1 |
| QQO85647.1 | HetE-N1→ TPR+GreAB-C+PIN*→                | TPR+GreAB-C+PIN           | 1089 | D7032_21665  | Gammaproteobacteria | Shewanella algae                       | hypothetical protein D7032_21665 [Shewanella algae].                            | -               |
| QQR55448.1 | X+PIN*→                                   | X+PIN                     | 1237 | IPG41_02740  | Bacteria            | Candidatus Peregrinibacteria bacterium | MAG: hypothetical protein IPG41_02740 [Candidatus Peregrinibacteria bacterium]. | GCA_016699145.1 |
| RAZ30556.1 | TPR+GreAB-C+PIN*→                         | TPR+GreAB-C+PIN           | 1208 | DO944_13495  | Actinobacteria      | Microbacterium sp. SMR1                | hypothetical protein DO944_13495 [Microbacterium sp. SMR1].                     | GCA_003289625.1 |
| RBN51622.1 | TPR+GreAB-C+PIN*→                         | TPR+GreAB-C+PIN           | 1135 | DR980_00180  | Bacteroidetes       | Flavobacterium psychrolimnae           | hypothetical protein DR980_00180 [Flavobacterium psychrolimnae].                | GCA_003312425.1 |
| RBP77372.1 | TPR+GreAB-C+PIN*→                         | TPR+GreAB-C+PIN           | 1175 | DFO80_1601   | Alphaproteobacteria | Rhodobacter sp. 140A                   | hypothetical protein DFO80_1601, partial [Rhodobacter sp. 140A].                | GCA_003315475.1 |
| RCI79301.1 | TPR+GreAB-C+PIN*→                         | TPR+GreAB-C+PIN           | 630  | DNK03_13895  | Alphaproteobacteria | Brucella anthropi                      | hypothetical protein DNK03_13895 [Brucella anthropi].                           | GCA_003325675.1 |
| REJ78752.1 | TPR+GreAB-C+PIN*→   <-?<-?<-?<-REase+SNF2 | TPR+GreAB-C+PIN           | 1257 | DWQ32_08270  | Acidobacteria       | Acidobacteria bacterium                | MAG: hypothetical protein DWQ32_08270 [Acidobacteria bacterium].                | GCA_003385635.1 |
| REJ87566.1 | TPR+PIN*→                                 | TPR+PIN                   | 2085 | DWQ34_24785  | Planctomycetes      | Planctomycetes bacterium               | MAG: hypothetical protein DWQ34_24785 [Planctomycetes bacterium].               | GCA_003388575.1 |
| RGJ64387.1 | X+PIN*→ HTH→?→?→ HTH→                     | X+PIN                     | 1176 | DXD50_08885  | Firmicutes          | Dorea formicigenerans                  | hypothetical protein DXD50_08885 [Dorea formicigenerans].                       | GCA_003437395.1 |
| RGN88412.1 | X+PIN*→ HTH→?→?→ HTH→                     | X+PIN                     | 1176 | DXB36_13695  | Firmicutes          | Dorea formicigenerans                  | hypothetical protein DXB36_13695 [Dorea formicigenerans].                       | GCA_003439255.1 |
| RGR97298.1 | TM+TM+TPR+PIN*→                           | TM+TM+TPR+PIN             | 1206 | DWY20_07060  | Bacteroidetes       | Phocaeicola coprocola                  | hypothetical protein DWY20_07060 [Phocaeicola coprocola].                       | GCA_003458565.1 |
| RGS66838.1 | X+PIN*→ HTH→?→?→ HTH→                     | X+PIN                     | 766  | DWX78_14950  | Firmicutes          | Dorea formicigenerans                  | hypothetical protein DWX78_14950 [Dorea formicigenerans].                       | GCA_003458845.1 |
| RGY02630.1 | TPR+GreAB-C+PIN*→                         | TPR+GreAB-C+PIN           | 410  | DXA56_15985  | Firmicutes          | Blautia obeum                          | hypothetical protein DXA56_15985 [Blautia obeum].                               | GCA_003463085.1 |
| RGZ63692.1 | Mbetalac→ Trypsin→?→ TPR+PIN*→            | TPR+PIN                   | 1371 | DW979_12370  | Firmicutes          | Eubacterium sp. AM49-13BH              | hypothetical protein DW979_12370, partial [Eubacterium sp. AM49-13BH].          | GCA_003464165.1 |
| RHN14952.1 | X+PIN*→ HTH→?→?→ HTH→                     | X+PIN                     | 1175 | DWZ24_11335  | Firmicutes          | Dorea formicigenerans                  | hypothetical protein DWZ24_11335 [Dorea formicigenerans].                       | GCA_003475555.1 |
| RHV44852.1 | X+PIN*→                                   | X+PIN                     | 1229 | DXB47_09745  | Firmicutes          | Firmicutes bacterium OM04-13BH         | hypothetical protein DXB47_09745 [Firmicutes bacterium OM04-13BH].              | GCA_003481745.1 |
| RHZ93582.1 | TPR+GreAB-C+PIN*→                         | TPR+GreAB-C+PIN           | 924  | D1920_20895  | Alphaproteobacteria | Rhodopseudomonas palustris             | hypothetical protein D1920_20895 [Rhodopseudomonas palustris].                  | GCA_003547145.1 |
| RJT21930.1 | TPR+GreAB-C*→                             | TPR+GreAB-C               | 282  | D5I55_15915  | Alphaproteobacteria | Aestuariusphingobium litorale          | hypothetical protein D5I55_15915 [Aestuariusphingobium litorale].               | GCA_003602075.1 |
| RKE07817.1 | TPR+PIN*→                                 | TPR+PIN                   | 806  | C8E86_2653   | Actinobacteria      | Catellatospora citrea                  | hypothetical protein C8E86_2653 [Catellatospora citrea].                        | GCA_003610235.1 |
| RKG98095.1 | TPR+GreAB-C+PIN*→                         | TPR+GreAB-C+PIN           | 461  | D7X32_30660  | Deltaproteobacteria | Coralloccoccus carmarthensis           | hypothetical protein D7X32_30660 [Coralloccoccus carmarthensis].                | GCA_003611695.1 |
| RKS06034.1 | TPR+PIN*→ PAIREDC-HTH→                    | TPR+PIN                   | 1209 | DFP74_1655   | Actinobacteria      | Nocardiopsis sp. Huas11                | hypothetical protein DFP74_1655 [Nocardiopsis sp. Huas11].                      | GCA_003634495.1 |

| acc        | operon                                                    | architecture                 | len  | gen.name     | taxend                | species                                     | define                                                                           | gca             |
|------------|-----------------------------------------------------------|------------------------------|------|--------------|-----------------------|---------------------------------------------|----------------------------------------------------------------------------------|-----------------|
| RKU09109.1 | TPR+GreAB-C+PIN*→                                         | TPR+GreAB-C+PIN              | 1315 | C6502_13840  | Bacteria              | Candidatus Poribacteria bacterium           | MAG: hypothetical protein C6502_13840 [Candidatus Poribacteria bacterium].       | GCA_003635265.1 |
| RKW53732.1 | X+PIN*→                                                   | X+PIN                        | 1207 | D8H95_11955  | Firmicutes            | Lachnospiraceae bacterium                   | MAG: hypothetical protein D8H95_11955 [Lachnospiraceae bacterium].               | GCA_003640285.1 |
| RKY60125.1 | PIN*→                                                     | PIN                          | 174  | DRP94_01435  | FCB group             | Candidatus Latescibacteria bacterium        | MAG: DUF3368 domain-containing protein [Candidatus Latescibacteria bacterium].   | GCA_003645885.1 |
| RMB87410.1 | TPR+PIN*→                                                 | TPR+PIN                      | 746  | CTZ28_00010  | Actinobacteria        | Streptomyces shenzhenensis                  | hypothetical protein CTZ28_00010 [Streptomyces shenzhenensis].                   | GCA_003688995.1 |
| RMQ50424.1 | REase+TPR+GreAB-C+PIN*→                                   | REase+TPR+GreAB-C+PIN        | 1489 | ALQ04_05433  | Gammaproteobacteria   | Pseudomonas cichorii                        | hypothetical protein ALQ04_05433 [Pseudomonas cichorii].                         | GCA_003700275.1 |
| RMV01228.1 | REase+TPR+GreAB-C+PIN*→                                   | REase+TPR+GreAB-C+PIN        | 1486 | ALP20_200053 | Gammaproteobacteria   | Pseudomonas coronafaciens pv. coronafaciens | hypothetical protein ALP20_200053 [Pseudomonas coronafaciens pv. coronafaciens]. | GCA_003702885.1 |
| RMV06369.1 | TPR+GreAB-C+PIN*→                                         | TPR+GreAB-C+PIN              | 904  | ALP17_05452  | Gammaproteobacteria   | Pseudomonas savastanoi                      | hypothetical protein ALP17_05452 [Pseudomonas savastanoi].                       | GCA_003702965.1 |
| RMV08832.1 | REase→ TPR+GreAB-C+PIN*→                                  | TPR+GreAB-C+PIN              | 881  | ALP16_05399  | Gammaproteobacteria   | Pseudomonas savastanoi                      | hypothetical protein ALP16_05399, partial [Pseudomonas savastanoi].              | GCA_003702985.1 |
| RNA68542.1 | <-REase  TPR+PIN*→                                        | TPR+PIN                      | 999  | EBO34_00790  | Firmicutes            | Bacillus sp. KQ-3                           | hypothetical protein EBO34_00790 [Bacillus sp. KQ-3].                            | GCA_003710255.1 |
| RND30553.1 | HetE-N1→ HetE-N1+TPR+GreAB-C+PIN*→                        | HetE-N1+TPR+GreAB-C+PIN      | 1088 | EC575_19215  | Gammaproteobacteria   | Vibrio cholerae                             | hypothetical protein EC575_19215 [Vibrio cholerae].                              | GCA_003712005.1 |
| ROZ42670.1 | HTH+PNPase+TPR+GreAB-C+PIN*→                              | HTH+PNPase+TPR+GreAB-C+PIN   | 1571 | EEB13_29810  | Actinobacteria        | Rhodococcus sp. WS3                         | hypothetical protein EEB13_29810 [Rhodococcus sp. WS3].                          | GCA_003797085.1 |
| RPV62916.1 | TPR+GreAB-C+PIN*→                                         | TPR+GreAB-C+PIN              | 808  | IPC830_03545 | Gammaproteobacteria   | Pseudomonas aeruginosa                      | hypothetical protein IPC830_03545 [Pseudomonas aeruginosa].                      | GCA_003836445.1 |
| RPX47920.1 | DOC+HTH→ REase+TOPC→?→ HetE-N1→ HetE-N1+TPR+GreAB-C+PIN*→ | HetE-N1+TPR+GreAB-C+PIN      | 1126 | IPC713_13275 | Gammaproteobacteria   | Pseudomonas aeruginosa                      | hypothetical protein IPC713_13275 [Pseudomonas aeruginosa].                      | GCA_003836815.1 |
| RQR65213.1 | REase+TPR+GreAB-C+PIN*→                                   | REase+TPR+GreAB-C+PIN        | 1346 | DIE12_31765  | Betaproteobacteria    | Burkholderia sp. Bp9015                     | tetratricopeptide repeat protein [Burkholderia sp. Bp9015].                      | GCA_003853505.1 |
| RQY09920.1 | REase+TPR+GreAB-C+PIN*→                                   | REase+TPR+GreAB-C+PIN        | 1135 | DF117_34925  | Betaproteobacteria    | Burkholderia stagnalis                      | tetratricopeptide repeat protein [Burkholderia stagnalis].                       | GCA_003857615.1 |
| RSM21562.1 | TPR+GreAB-C+PIN*→                                         | TPR+GreAB-C+PIN              | 851  | C5B76_20720  | Gammaproteobacteria   | Aeromonas salmonicida                       | hypothetical protein C5B76_20720 [Aeromonas salmonicida].                        | GCA_003947355.1 |
| RSM25744.1 | MNS-Npun2340+TPR+GreAB-C+PIN*→                            | MNS-Npun2340+TPR+GreAB-C+PIN | 851  | C5B77_18585  | Gammaproteobacteria   | Aeromonas salmonicida                       | hypothetical protein C5B77_18585 [Aeromonas salmonicida].                        | GCA_003947375.1 |
| RWE64146.1 | REase+TPR+GreAB-C+PIN*→                                   | REase+TPR+GreAB-C+PIN        | 1329 | EOS62_30690  | Alphaproteobacteria   | Mesorhizobium sp.                           | MAG: hypothetical protein EOS62_30690 [Mesorhizobium sp.].                       | GCA_004018195.1 |
| RWI50090.1 | REase+TPR+GreAB-C+PIN*→                                   | REase+TPR+GreAB-C+PIN        | 1328 | EOR16_31040  | Alphaproteobacteria   | Mesorhizobium sp.                           | MAG: hypothetical protein EOR16_31040 [Mesorhizobium sp.].                       | GCA_004019035.1 |
| RWN29279.1 | REase+TPR+TPR+GreAB-C+PIN*→                               | REase+TPR+TPR+GreAB-C+PIN    | 1333 | EOR95_21980  | Alphaproteobacteria   | Mesorhizobium sp.                           | MAG: hypothetical protein EOR95_21980 [Mesorhizobium sp.].                       | GCA_004020785.1 |
| RWN66659.1 | REase+TPR+TPR+GreAB-C+PIN*→                               | REase+TPR+TPR+GreAB-C+PIN    | 1333 | EOR99_16025  | Alphaproteobacteria   | Mesorhizobium sp.                           | MAG: hypothetical protein EOR99_16025 [Mesorhizobium sp.].                       | GCA_004020565.1 |
| RWQ61473.1 | REase+TPR+TPR+GreAB-C+PIN*→                               | REase+TPR+TPR+GreAB-C+PIN    | 1333 | EOS86_33015  | Alphaproteobacteria   | Mesorhizobium sp.                           | MAG: hypothetical protein EOS86_33015 [Mesorhizobium sp.].                       | GCA_004021745.1 |
| RWQ70448.1 | REase+TPR+TPR+GreAB-C+PIN*→                               | REase+TPR+TPR+GreAB-C+PIN    | 1002 | EOS85_27065  | Alphaproteobacteria   | Mesorhizobium sp.                           | MAG: hypothetical protein EOS85_27065 [Mesorhizobium sp.].                       | GCA_004021925.1 |
| RWU17258.1 | REase+TPR+GreAB-C+PIN*→                                   | REase+TPR+GreAB-C+PIN        | 1447 | DM813_28290  | Gammaproteobacteria   | Pseudomonas alkylphenolica                  | hypothetical protein DM813_28290 [Pseudomonas alkylphenolica].                   | GCA_004025535.1 |
| RXH58244.1 | REase+TPR+GreAB-C+PIN*→                                   | REase+TPR+GreAB-C+PIN        | 1185 | GRAN_1554    | Acidobacteria         | Granulicella sibirica                       | hypothetical protein GRAN_1554 [Granulicella sibirica].                          | GCA_004115155.1 |
| RXX05389.1 | REase+TPR+GreAB-C+PIN*→                                   | REase+TPR+GreAB-C+PIN        | 1249 | CRU97_08585  | Epsilonproteobacteria | Halarcobacter bivalviorum                   | hypothetical protein CRU97_08585 [Halarcobacter bivalviorum].                    | GCA_004116705.1 |

| acc        | operon                                                 | architecture          | len  | gen.name           | taxend                | species                       | define                                                                        | gca             |
|------------|--------------------------------------------------------|-----------------------|------|--------------------|-----------------------|-------------------------------|-------------------------------------------------------------------------------|-----------------|
| RXO70745.1 | HetE-N1→?→ TPR+GreAB-C+PIN*→                           | TPR+GreAB-C+PIN       | 686  | D0516_07920        | Gammaproteobacteria   | Salmonella enterica           | hypothetical protein D0516_07920 [Salmonella enterica].                       | GCA_004120835.1 |
| RYE55646.1 | PIN*→                                                  | PIN                   | 344  | EOP48_09765        | Bacteroidetes         | Sphingobacteriales bacterium  | MAG: hypothetical protein EOP48_09765 [Sphingobacteriales bacterium].         | GCA_004144425.1 |
| RYG99407.1 | REase+TPR+GreAB-C+PIN*→                                | REase+TPR+GreAB-C+PIN | 1330 | EON58_04040        | Alphaproteobacteria   | Alphaproteobacteria bacterium | MAG: hypothetical protein EON58_04040 [Alphaproteobacteria bacterium].        | GCA_004145575.1 |
| RYX84272.1 | TPR+GreAB-C+PIN*→                                      | TPR+GreAB-C+PIN       | 1192 | EON83_11290        | unclassified Bacteria | bacterium                     | MAG: hypothetical protein EON83_11290 [bacterium].                            | GCA_004172935.1 |
| RYY90115.1 | REase+TPR+GreAB-C+PIN*→                                | REase+TPR+GreAB-C+PIN | 1333 | EOO15_03925        | Bacteroidetes         | Chitinophagaceae bacterium    | MAG: hypothetical protein EOO15_03925 [Chitinophagaceae bacterium].           | GCA_004173495.1 |
| RZJ58585.1 | TPR+PIN*→                                              | TPR+PIN               | 1309 | EOO55_00010        | Bacteroidetes         | Hymenobacter sp.              | MAG: hypothetical protein EOO55_00010 [Hymenobacter sp.].                     | GCA_004211105.1 |
| RZJ92304.1 | TPR+GreAB-C+PIN*→                                      | TPR+GreAB-C+PIN       | 1267 | EOO20_02310        | Bacteroidetes         | Chryseobacterium sp.          | MAG: hypothetical protein EOO20_02310 [Chryseobacterium sp.].                 | GCA_004210875.1 |
| RZJ92386.1 | REase+nSTAND3→ TPR+GreAB-C+PIN*→                       | TPR+GreAB-C+PIN       | 1237 | EOO20_01975        | Bacteroidetes         | Chryseobacterium sp.          | MAG: tetratricopeptide repeat protein [Chryseobacterium sp.].                 | GCA_004210875.1 |
| RZL63110.1 | PIN*→                                                  | PIN                   | 307  | EOO93_08085        | Bacteroidetes         | Pedobacter sp.                | MAG: hypothetical protein EOO93_08085 [Pedobacter sp.].                       | GCA_004295955.1 |
| RZL84003.1 | REase+TPR+GreAB-C+PIN*→                                | REase+TPR+GreAB-C+PIN | 1323 | EOP66_03300        | Alphaproteobacteria   | Sphingomonas sp.              | MAG: tetratricopeptide repeat protein [Sphingomonas sp.].                     | GCA_004296035.1 |
| SCB54124.1 | REase+TPR+GreAB-C+PIN*→                                | REase+TPR+GreAB-C+PIN | 1171 | GA0061098_102379   | Alphaproteobacteria   | Bradyrhizobium shewense       | Transcription elongation factor, GreA/GreB family [Bradyrhizobium shewense].  | GCA_900094605.1 |
| SCE01180.1 | TPR+PIN*→   <-NUDIX                                    | TPR+PIN               | 1134 | GA0115241_108994   | Actinobacteria        | Streptomyces sp. DpondAA-D4   | hypothetical protein GA0115241_108994 [Streptomyces sp. DpondAA-D4].          | GCA_900091745.1 |
| SCF05211.1 | REase+TPR+GreAB-C+PIN*→                                | REase+TPR+GreAB-C+PIN | 1358 | GA0070215_1072     | Actinobacteria        | Micromonospora marina         | hypothetical protein GA0070215_1072 [Micromonospora marina].                  | GCA_900091565.1 |
| SCF05420.1 | SAD+HNH→ X+PIN*→                                       | X+PIN                 | 1233 | GA0070562_5649     | Actinobacteria        | Micromonospora tulbaghiaae    | hypothetical protein GA0070562_5649 [Micromonospora tulbaghiaae].             | GCA_900091605.1 |
| SCL17674.1 | REase+TPR+GreAB-C+PIN*→                                | REase+TPR+GreAB-C+PIN | 1264 | GA0074694_2093     | Actinobacteria        | Micromonospora inyonensis     | Tfp pilus assembly protein PilF [Micromonospora inyonensis].                  | GCA_900091415.1 |
| SCQ18794.1 | CHC2+Toprim-DNAG→?→?→?→ HTH→ SIG+TM→ TPR+GreAB-C+PIN*→ | TPR+GreAB-C+PIN       | 1126 | TFUB4_00594        | Bacteroidetes         | Tannerella forsythia          | hypothetical protein TFUB4_00594 [Tannerella forsythia].                      | GCA_900096725.1 |
| SCQ19220.1 | CHC2+Toprim-DNAG→?→?→?→ HTH→ SIG+TM→ TPR+GreAB-C+PIN*→ | TPR+GreAB-C+PIN       | 1126 | TFUB20_00631       | Bacteroidetes         | Tannerella forsythia          | hypothetical protein TFUB20_00631 [Tannerella forsythia].                     | GCA_900096735.1 |
| SEP47521.1 | TPR+GreAB-C+PIN*→                                      | TPR+GreAB-C+PIN       | 975  | SAMN02787149_1275  | Gammaproteobacteria   | Pseudomonas sp. Snoq117.2     | hypothetical protein SAMN02787149_1275 [Pseudomonas sp. Snoq117.2].           | GCA_900110545.1 |
| SFD04359.1 | <-KAP_NTPase  TPR+PIN*→                                | TPR+PIN               | 1216 | SAMN04487968_1267  | Actinobacteria        | Nocardioides terrae           | hypothetical protein SAMN04487968_1267 [Nocardioides terrae].                 | GCA_900112345.1 |
| SFF03357.1 | <-Cas_Cas1<-?  ?→?→?→?→ REase+TPR+GreAB-C+PIN*→        | REase+TPR+GreAB-C+PIN | 1349 | SAMN05428977_10446 | Betaproteobacteria    | Nitrosomonas sp. Nm166        | hypothetical protein SAMN05428977_10446 [Nitrosomonas sp. Nm166].             | GCA_900112825.1 |
| SHH05937.1 | REase+TPR+GreAB-C+PIN*→                                | REase+TPR+GreAB-C+PIN | 1445 | SAMN05428948_2561  | Betaproteobacteria    | Massilia sp. CF038            | hypothetical protein SAMN05428948_2561 [Massilia sp. CF038].                  | GCA_900129765.1 |
| SHN30683.1 | PAIREDC-HTH→ REase+TPR+GreAB-C+PIN*→                   | REase+TPR+GreAB-C+PIN | 1588 | SAMN02787076_04976 | Betaproteobacteria    | Rhizobacter sp. OV335         | hypothetical protein SAMN02787076_04976 [Rhizobacter sp. OV335].              | GCA_900142965.1 |
| SIO63359.1 | REase+TPR+GreAB-C+PIN*→                                | REase+TPR+GreAB-C+PIN | 1291 | SAMN05444166_7323  | Planctomycetes        | Singulisphaera sp. GP187      | Transcription elongation factor, GreA/GreB family [Singulisphaera sp. GP187]. | GCA_900129635.1 |
| SOZ22209.1 | REase+TPR+GreAB-C+PIN→?→?→ PIN*→                       | PIN                   | 271  | CBM2604_U10003     | Betaproteobacteria    | Cupriavidus taiwanensis       | hypothetical protein CBM2604_U10003 [Cupriavidus taiwanensis].                | GCA_900249855.1 |
| SPT59210.1 | TPR+GreAB-C+PIN*→                                      | TPR+GreAB-C+PIN       | 1218 | NCTC11373_05764    | Actinobacteria        | Actinomadura madurae          | Flp pilus assembly protein TadD, contains TPR repeats [Actinomadura madurae]. | GCA_900445005.1 |
| SPY99988.1 | TPR+GreAB-C+PIN*→                                      | TPR+GreAB-C+PIN       | 1146 | NCTC11842_00133    | Gammaproteobacteria   | Pseudomonas luteola           | Uncharacterised protein [Pseudomonas luteola].                                | GCA_900455515.1 |

| acc        | operon                                          | architecture          | len  | gen.name        | taxend                | species                                                    | define                                                                                             | gca             |
|------------|-------------------------------------------------|-----------------------|------|-----------------|-----------------------|------------------------------------------------------------|----------------------------------------------------------------------------------------------------|-----------------|
| SQK85244.1 | DOC+HTH→ REase+TOPC→ HetE-N1→ TPR+GreAB-C+PIN*→ | TPR+GreAB-C+PIN       | 1088 | NCTC9433_00599  | Gammaproteobacteria   | <i>Pseudomonas aeruginosa</i>                              | Uncharacterised protein [ <i>Pseudomonas aeruginosa</i> ].                                         | GCA_900478745.1 |
| SSC09307.1 | TPR+GreAB-C+PIN*→                               | TPR+GreAB-C+PIN       | 1137 | BTURTLESOX_2492 | unclassified Bacteria | bacterium endosymbiont of <i>Bathymodiolus</i> sp. 5 South | hypothetical protein BTURTLESOX_2492 [bacterium endosymbiont of <i>Bathymodiolus</i> sp. 5 South]. | GCA_900127295.1 |
| STJ38438.1 | HetE-N1→ TPR+GreAB-C+PIN*→                      | TPR+GreAB-C+PIN       | 1093 | NCTC9110_01467  | Gammaproteobacteria   | <i>Escherichia coli</i>                                    | Uncharacterised protein [ <i>Escherichia coli</i> ].                                               | GCA_900449425.1 |
| STR27356.1 | REase+TPR+GreAB-C+PIN*→                         | REase+TPR+GreAB-C+PIN | 1303 | NCTC8661_05000  | Betaproteobacteria    | <i>Janthinobacterium lividum</i>                           | Putative Zn-dependent protease, contains TPR repeats [Janthinobacterium lividum].                  | GCA_900451225.1 |
| SUJ03282.1 | PIN*→                                           | PIN                   | 223  | NCTC4822_01389  | Firmicutes            | <i>Sporosarcina pasteurii</i>                              | Uncharacterised protein [ <i>Sporosarcina pasteurii</i> ].                                         | GCA_900457495.1 |
| TAA79883.1 | HetE-N1→ TPR+GreAB-C+PIN*→                      | TPR+GreAB-C+PIN       | 1069 | PMCND_08490     | Gammaproteobacteria   | <i>Pasteurella multocida</i>                               | hypothetical protein PMCND_08490 [ <i>Pasteurella multocida</i> ].                                 | GCA_004286935.1 |
| TAJ47852.1 | TPR+PIN*→                                       | TPR+PIN               | 1186 | EPO52_06520     | Actinobacteria        | <i>Herbiconiux</i> sp.                                     | MAG: hypothetical protein EPO52_06520 [ <i>Herbiconiux</i> sp.].                                   | GCA_004297105.1 |
| TAM51231.1 | REase+TPR+GreAB-C+PIN*→                         | REase+TPR+GreAB-C+PIN | 1301 | EPN57_18445     | Betaproteobacteria    | <i>Paraburkholderia</i> sp.                                | MAG: hypothetical protein EPN57_18445 [ <i>Paraburkholderia</i> sp.].                              | GCA_004322045.1 |
| TAM55201.1 | REase+TPR+GreAB-C+PIN*→   <-?  AbiJ-NTD3+REase→ | REase+TPR+GreAB-C+PIN | 1335 | EPN57_04160     | Betaproteobacteria    | <i>Paraburkholderia</i> sp.                                | MAG: hypothetical protein EPN57_04160 [ <i>Paraburkholderia</i> sp.].                              | GCA_004322045.1 |
| TCU73661.1 | TPR+GreAB-C+PIN*→                               | TPR+GreAB-C+PIN       | 1313 | EDE10_104327    | Alphaproteobacteria   | <i>Bradyrhizobium</i> sp. Y-H1                             | tetratricopeptide repeat protein [ <i>Bradyrhizobium</i> sp. Y-H1].                                | GCA_004346395.1 |
| TDM08142.1 | REase+TPR+GreAB-C+PIN*→                         | REase+TPR+GreAB-C+PIN | 1202 | C4K60_01155     | Betaproteobacteria    | <i>Ideonella</i> sp. MAG2                                  | MAG: hypothetical protein C4K60_01155 [ <i>Ideonella</i> sp. MAG2].                                | GCA_004359425.1 |
| TDZ78257.1 | TPR+PIN*→                                       | TPR+PIN               | 1185 | DE4585_04094    | Actinobacteria        | <i>Mycobacteroides salmoniphilum</i>                       | hypothetical protein DE4585_04094 [ <i>Mycobacteroides salmoniphilum</i> ].                        | GCA_004366855.1 |
| TIN45883.1 | TPR+GreAB-C+PIN*→ TPR→                          | TPR+GreAB-C+PIN       | 539  | E5Y32_12205     | Alphaproteobacteria   | <i>Mesorhizobium</i> sp.                                   | MAG: GreA/GreB family elongation factor [ <i>Mesorhizobium</i> sp.].                               | GCA_004961865.1 |
| TIT34473.1 | TPR+GreAB-C+PIN*→                               | TPR+GreAB-C+PIN       | 502  | E5W78_10605     | Alphaproteobacteria   | <i>Mesorhizobium</i> sp.                                   | MAG: hypothetical protein E5W78_10605, partial [ <i>Mesorhizobium</i> sp.].                        | GCA_004965505.1 |
| TIX43905.1 | TPR+GreAB-C+PIN*→                               | TPR+GreAB-C+PIN       | 708  | E5V40_01360     | Alphaproteobacteria   | <i>Mesorhizobium</i> sp.                                   | MAG: GreA/GreB family elongation factor [ <i>Mesorhizobium</i> sp.].                               | GCA_004964855.1 |
| TLM83646.1 | TPR+PIN*→                                       | TPR+PIN               | 1179 | FDW83_09305     | Actinobacteria        | <i>Pseudarthrobacter</i> sp. NamE2                         | tetratricopeptide repeat protein [ <i>Pseudarthrobacter</i> sp. NamE2].                            | GCA_005796205.1 |
| TMA89552.1 | REase+TPR+GreAB-C+PIN*→                         | REase+TPR+GreAB-C+PIN | 1299 | E6J74_25025     | Deltaproteobacteria   | <i>Deltaproteobacteria</i> bacterium                       | MAG: hypothetical protein E6J74_25025 [ <i>Deltaproteobacteria</i> bacterium].                     | GCA_005879255.1 |
| TMJ19619.1 | REase+TPR+GreAB-C+PIN*→                         | REase+TPR+GreAB-C+PIN | 1331 | E6G92_07565     | Alphaproteobacteria   | <i>Alphaproteobacteria</i> bacterium                       | MAG: hypothetical protein E6G92_07565 [ <i>Alphaproteobacteria</i> bacterium].                     | GCA_005883305.1 |
| TOF36973.1 | TPR+GreAB-C+PIN*→                               | TPR+GreAB-C+PIN       | 785  | CGJ28_20670     | Gammaproteobacteria   | <i>Vibrio parahaemolyticus</i>                             | hypothetical protein CGJ28_20670 [ <i>Vibrio parahaemolyticus</i> ].                               | GCA_006371865.1 |
| TOH27190.1 | GreAB-C*→                                       | GreAB-C               | 599  | CGI84_22675     | Gammaproteobacteria   | <i>Vibrio parahaemolyticus</i>                             | hypothetical protein CGI84_22675, partial [ <i>Vibrio parahaemolyticus</i> ].                      | GCA_006372765.1 |
| TQE99579.1 | REase+SNF2→ REase+TPR+GreAB-C+PIN*→             | REase+TPR+GreAB-C+PIN | 1230 | FKY71_07895     | Gammaproteobacteria   | <i>Spiribacter salinus</i>                                 | MAG: hypothetical protein FKY71_07895 [ <i>Spiribacter salinus</i> ].                              | GCA_006569195.1 |
| TQS42859.1 | REase+TPR+GreAB-C+PIN*→                         | REase+TPR+GreAB-C+PIN | 1252 | FL583_22685     | Actinobacteria        | <i>Cryptosporangium phraense</i>                           | DUF4365 domain-containing protein [ <i>Cryptosporangium phraense</i> ].                            | GCA_006912135.1 |
| TSP11291.1 | REase+TPR+GreAB-C+PIN*→                         | REase+TPR+GreAB-C+PIN | 1314 | FGG12_18885     | Betaproteobacteria    | <i>Cupriavidus campinensis</i>                             | DUF4365 domain-containing protein [ <i>Cupriavidus campinensis</i> ].                              | GCA_007572485.1 |
| TVP63446.1 | EAD10+SWACOS→?→ EAD10+TPR+GreAB-C+PIN*→         | EAD10+TPR+GreAB-C+PIN | 1213 | EA343_08005     | Cyanobacteria         | <i>Nodularia</i> sp. (in: Bacteria)                        | MAG: hypothetical protein EA343_08005 [ <i>Nodularia</i> sp. (in: Bacteria)].                      | GCA_007692755.1 |
| TWD39045.1 | HetE-N1→ TPR+GreAB-C+PIN*→                      | TPR+GreAB-C+PIN       | 1117 | FBY13_107200    | Gammaproteobacteria   | <i>Pantoea</i> sp. SJZ147                                  | hypothetical protein FBY13_107200 [ <i>Pantoea</i> sp. SJZ147].                                    | GCA_007828605.1 |
| TWI95027.1 | TPR+GreAB-C+PIN→ PIN*→                          | PIN                   | 240  | JN11_04456      | Bacteroidetes         | <i>Mucilaginibacter frigoritolerans</i>                    | hypothetical protein JN11_04456 [ <i>Mucilaginibacter frigoritolerans</i> ].                       | GCA_007830615.1 |

| acc            | operon                         | architecture              | len  | gen.name           | taxend                | species                                  | define                                                                                                                          | gca             |
|----------------|--------------------------------|---------------------------|------|--------------------|-----------------------|------------------------------------------|---------------------------------------------------------------------------------------------------------------------------------|-----------------|
| TXH46669.1     | REase+TPR+GreAB-C+PIN*→        | REase+TPR+GreAB-C+PIN     | 1345 | E6Q92_01630        | Betaproteobacteria    | Burkholderiaceae bacterium               | MAG: tetratricopeptide repeat protein [Burkholderiaceae bacterium].                                                             | GCA_008012415.1 |
| TXJ01161.1     | X+PIN*→                        | X+PIN                     | 1259 | E6Q32_04910        | Betaproteobacteria    | Neisseriales bacterium                   | MAG: hypothetical protein E6Q32_04910 [Neisseriales bacterium].                                                                 | GCA_008017145.1 |
| VBE91451.1     | REase+TPR+GreAB-C+PIN*→        | REase+TPR+GreAB-C+PIN     | 1327 | SAMEA2066717_00371 | Betaproteobacteria    | Burkholderia pseudomallei                | Uncharacterised protein [Burkholderia pseudomallei].                                                                            | GCA_900591745.1 |
| VBP17170.1     | REase+TPR+GreAB-C+PIN*→        | REase+TPR+GreAB-C+PIN     | 1327 | SAMEA2065229_01356 | Betaproteobacteria    | Burkholderia pseudomallei                | Uncharacterised protein [Burkholderia pseudomallei].                                                                            | GCA_900593515.1 |
| VBP73370.1     | REase+TPR+GreAB-C+PIN*→        | REase+TPR+GreAB-C+PIN     | 1327 | SAMEA2068240_03247 | Betaproteobacteria    | Burkholderia pseudomallei                | Uncharacterised protein [Burkholderia pseudomallei].                                                                            | GCA_900593615.1 |
| VEA49048.1     | HetE-N1→ TPR+GreAB-C+PIN*→     | TPR+GreAB-C+PIN           | 1107 | NCTC7306_04489     | Gammaproteobacteria   | Salmonella enterica subsp. arizonae      | Uncharacterised protein [Salmonella enterica subsp. arizonae].                                                                  | GCA_900635595.1 |
| VTU02511.1     | REase+TPR+GreAB-C+PIN*→        | REase+TPR+GreAB-C+PIN     | 2231 | GCJUQL4_63830      | Planctomycetes        | Gemmataceae bacterium                    | atpase aaa : Uncharacterized protein OS=delta proteobacterium MLMS-1 GN=MldDRAFT_0410 PE=4 SV=1: TPR_9 [Gemmataceae bacterium]. | GCA_901538445.1 |
| VUO82246.1     | REase+TPR+GreAB-C+PIN*→        | REase+TPR+GreAB-C+PIN     | 1284 | MFJNGALL_01363     | Gammaproteobacteria   | Stenotrophomonas maltophilia             | hypothetical protein MFJNGALL_01363 [Stenotrophomonas maltophilia].                                                             | GCA_902157665.1 |
| VUP91206.1     | REase+TPR→ TPR+PIN*→           | TPR+PIN                   | 777  | MKCKLKB_00143      | Gammaproteobacteria   | Stenotrophomonas maltophilia             | hypothetical protein MKCKLKB_00143 [Stenotrophomonas maltophilia].                                                              | GCA_902158105.1 |
| VVH66851.1     | TPR+GreAB-C+PIN*→              | TPR+GreAB-C+PIN           | 1163 | BSPLISOX_572       | environmental samples | uncultured Gammaproteobacteria bacterium | hypothetical protein BSPLISOX_572 [uncultured Gammaproteobacteria bacterium].                                                   | GCA_902497535.1 |
| VVM25671.1     | TPR→ TPR+GreAB-C+PIN*→         | TPR+GreAB-C+PIN           | 622  | BSPWISOXPB_7707    | environmental samples | uncultured Gammaproteobacteria bacterium | hypothetical protein BSPWISOXPB_7707 [uncultured Gammaproteobacteria bacterium].                                                | GCA_902497575.1 |
| WP_000012642.1 | TPR+PIN*→                      | TPR+PIN                   | 1218 | -                  | Firmicutes            | Bacillus cereus                          | hypothetical protein [Bacillus cereus].                                                                                         | GCF_000291235.1 |
| WP_000989353.1 | HetE-N1→ TPR+GreAB-C+PIN*→     | TPR+GreAB-C+PIN           | 1094 | -                  | Gammaproteobacteria   | Escherichia                              | MULTISPECIES: hypothetical protein [Escherichia].                                                                               | GCF_000503375.1 |
| WP_002163366.1 | TPR+PIN*→                      | TPR+PIN                   | 1214 | -                  | Firmicutes            | Bacillus paranthracis                    | hypothetical protein [Bacillus paranthracis].                                                                                   | GCF_900176925.1 |
| WP_002203277.1 | TPR+PIN*→                      | TPR+PIN                   | 1158 | -                  | Firmicutes            | Bacillus cereus                          | hypothetical protein [Bacillus cereus].                                                                                         | GCF_000293545.1 |
| WP_002981151.1 | TPR+GreAB-C+PIN*→              | TPR+GreAB-C+PIN           | 1137 | -                  | Bacteroidetes         | Chryseobacterium                         | MULTISPECIES: hypothetical protein [Chryseobacterium].                                                                          | GCF_003815675.1 |
| WP_003193440.1 | TPR+PIN*→                      | TPR+PIN                   | 1179 | -                  | Firmicutes            | Bacillus mycoides                        | hypothetical protein [Bacillus mycoides].                                                                                       | GCF_000003925.1 |
| WP_003320554.1 | TPR+GreAB-C+PIN*→              | TPR+GreAB-C+PIN           | 1148 | -                  | Firmicutes            | Alkalihalobacillus alcalophilus          | hypothetical protein [Alkalihalobacillus alcalophilus].                                                                         | GCF_000292245.2 |
| WP_003365555.1 | TPR+GreAB-C+PIN*→              | TPR+GreAB-C+PIN           | 1052 | -                  | Firmicutes            | Clostridium botulinum                    | hypothetical protein [Clostridium botulinum].                                                                                   | GCF_000171095.1 |
| WP_004107781.1 | REase+TPR+TPR+GreAB-C+PIN*→    | REase+TPR+TPR+GreAB-C+PIN | 1363 | -                  | Alphaproteobacteria   | Rhizobium freirei                        | restriction endonuclease [Rhizobium freirei].                                                                                   | GCF_000359745.1 |
| WP_004552328.1 | REase+TPR+GreAB-C+PIN*→        | REase+TPR+GreAB-C+PIN     | 1345 | -                  | Betaproteobacteria    | Burkholderia pseudomallei                | hypothetical protein [Burkholderia pseudomallei].                                                                               | GCF_000259815.1 |
| WP_005336021.1 | X+PIN*→ HTH→?→?→ HTH→          | X+PIN                     | 1180 | -                  | Firmicutes            | Dorea formicigenerans                    | hypothetical protein [Dorea formicigenerans].                                                                                   | GCF_000169235.1 |
| WP_005619555.1 | REase+TPR+GreAB-C+PIN*→        | REase+TPR+GreAB-C+PIN     | 1313 | -                  | Alphaproteobacteria   | Epibacterium mobile                      | tetratricopeptide repeat protein [Epibacterium mobile].                                                                         | GCF_000376545.2 |
| WP_005875010.1 | HTH→ SIG+TM→ TPR+GreAB-C+PIN*→ | TPR+GreAB-C+PIN           | 1125 | -                  | Bacteroidetes         | Porphyromonas gingivalis                 | hypothetical protein [Porphyromonas gingivalis].                                                                                | GCF_000007585.1 |
| WP_007114289.1 | TPR+GreAB-C+PIN*→              | TPR+GreAB-C+PIN           | 1116 | -                  | Gammaproteobacteria   | Halomonas boliviensis                    | hypothetical protein [Halomonas boliviensis].                                                                                   | GCF_000236035.1 |
| WP_007575774.1 | REase+TPR+GreAB-C+PIN*→        | REase+TPR+GreAB-C+PIN     | 1298 | -                  | Actinobacteria        | Patulibacter medicamentivorans           | hypothetical protein [Patulibacter medicamentivorans].                                                                          | GCF_000240225.1 |
| WP_008074062.1 | HetE-N1→ TPR+GreAB-C+PIN*→     | TPR+GreAB-C+PIN           | 1116 | -                  | Gammaproteobacteria   | Vibrio sinaloensis                       | hypothetical protein [Vibrio sinaloensis].                                                                                      | GCF_000189275.1 |
| WP_008371053.1 | TPR+GreAB-C+PIN*→              | TPR+GreAB-C+PIN           | 916  | -                  | Gammaproteobacteria   | Pseudomonas sp. M47T1                    | hypothetical protein [Pseudomonas sp. M47T1].                                                                                   | GCF_000263855.1 |
| WP_008676251.1 | REase+TPR+GreAB-C+PIN*→        | REase+TPR+GreAB-C+PIN     | 1224 | -                  | Planctomycetes        | Rhodopirellula sallentina                | phosphorylase family 1 protein [Rhodopirellula sallentina].                                                                     | GCF_000346505.1 |
| WP_008891423.1 | REase+TPR+GreAB-C+PIN*→        | REase+TPR+GreAB-C+PIN     | 1287 | -                  | Alphaproteobacteria   | Thalassospira profundimaris              | tetratricopeptide repeat protein [Thalassospira profundimaris].                                                                 | GCF_000300275.1 |
| WP_009135826.1 | X+PIN*→                        | X+PIN                     | 1248 | -                  | Bacteroidetes         | Odoribacter laneus                       | hypothetical protein [Odoribacter laneus].                                                                                      | GCF_902374615.1 |
| WP_009204273.1 | X+PIN*→                        | X+PIN                     | 1224 | -                  | Firmicutes            | Anaerostipes hadrus                      | hypothetical protein [Anaerostipes hadrus].                                                                                     | GCF_000332875.2 |

| acc            | operon                                        | architecture                 | len  | gen.name | taxend              | species                            | define                                                                   | gca             |
|----------------|-----------------------------------------------|------------------------------|------|----------|---------------------|------------------------------------|--------------------------------------------------------------------------|-----------------|
| WP_009805247.1 | REase+TPR+GreAB-C+PIN*→                       | REase+TPR+GreAB-C+PIN        | 1334 | -        | Alphaproteobacteria | Pseudoocceanicola batsensis        | restriction endonuclease [Pseudoocceanicola batsensis].                  | GCF_000152725.1 |
| WP_009857784.1 | REase+TPR+GreAB-C+PIN*→                       | REase+TPR+GreAB-C+PIN        | 1374 | -        | Betaproteobacteria  | Rubrivivax benzoatilyticus         | restriction endonuclease [Rubrivivax benzoatilyticus].                   | GCF_000190375.1 |
| WP_009899558.1 | TPR+GreAB-C+PIN*→                             | TPR+GreAB-C+PIN              | 1069 | -        | Firmicutes          | Clostridioides difficile           | hypothetical protein [Clostridioides difficile].                         | GCF_000211235.1 |
| WP_010516915.1 | REase+TPR+GreAB-C+PIN*→                       | REase+TPR+GreAB-C+PIN        | 1323 | -        | Alphaproteobacteria | Komagataeibacter oboediens         | tetratricopeptide repeat protein [Komagataeibacter oboediens].           | GCF_000227565.1 |
| WP_010555470.1 | HetE-N1→ TPR+GreAB-C+PIN*→                    | TPR+GreAB-C+PIN              | 1100 | -        | Gammaproteobacteria | Pseudoalteromonas arctica          | hypothetical protein [Pseudoalteromonas arctica].                        | GCF_000238395.3 |
| WP_011204815.1 | REase+TPR+GreAB-C+PIN*→   <-HTH+HTH           | REase+TPR+GreAB-C+PIN        | 1344 | -        | Betaproteobacteria  | Burkholderia pseudomallei          | hypothetical protein [Burkholderia pseudomallei].                        | GCF_000350505.1 |
| WP_011691689.1 | TPR+PIN*→                                     | TPR+PIN                      | 1180 | -        | Actinobacteria      | Arthrobacter sp. FB24              | tetratricopeptide repeat protein [Arthrobacter sp. FB24].                | GCF_000196235.1 |
| WP_012187551.1 | TPR+PIN*→                                     | TPR+PIN                      | 1280 | -        | Gammaproteobacteria | Fluoribacter dumoffii              | hypothetical protein [Fluoribacter dumoffii].                            | -               |
| WP_012304478.1 | HetE-N1→ TPR+GreAB-C+PIN*→                    | TPR+GreAB-C+PIN              | 1090 | -        | Gammaproteobacteria | Yersinia pseudotuberculosis        | hypothetical protein [Yersinia pseudotuberculosis].                      | GCF_000019465.1 |
| WP_012365289.1 | REase+TPR+GreAB-C+PIN*→                       | REase+TPR+GreAB-C+PIN        | 1351 | -        | Betaproteobacteria  | Burkholderia ambifaria             | hypothetical protein [Burkholderia ambifaria].                           | GCF_000019925.1 |
| WP_012655030.1 | REase+TPR+GreAB-C+PIN*→                       | REase+TPR+GreAB-C+PIN        | 1290 | -        | Alphaproteobacteria | Agrobacterium vitis                | tetratricopeptide repeat protein [Agrobacterium vitis].                  | GCF_000016285.1 |
| WP_013320645.1 | <-TIR+CASPASE<-?<-?  PNPase+TPR+GreAB-C+PIN*→ | PNPase+TPR+GreAB-C+PIN       | 1389 | -        | Cyanobacteria       | Gloeothece verrucosa               | purine or other phosphorylase family 1 [Gloeothece verrucosa].           | GCF_000147335.1 |
| WP_013724217.1 | HetE-N1→ MNS-Npun2340+TPR+GreAB-C+PIN*→       | MNS-Npun2340+TPR+GreAB-C+PIN | 1094 | -        | Gammaproteobacteria | Aeromonas veronii                  | hypothetical protein [Aeromonas veronii].                                | GCF_000204115.1 |
| WP_013846680.1 | REase+TPR+GreAB-C+PIN*→                       | REase+TPR+GreAB-C+PIN        | 1311 | -        | Alphaproteobacteria | Sphingobium chlorophenicum         | hypothetical protein [Sphingobium chlorophenicum].                       | GCF_000147835.2 |
| WP_013921742.1 | Mbetalac→ Trypsin+TPR+GreAB-C+PIN*→           | Trypsin+TPR+GreAB-C+PIN      | 1363 | -        | Bacteroidetes       | Runella slithyformis               | trypsin-like peptidase domain-containing protein [Runella slithyformis]. | GCF_000218895.1 |
| WP_014399772.1 | TPR+GreAB-C+PIN*→                             | TPR+GreAB-C+PIN              | 1160 | -        | Deltaproteobacteria | Coralloccoccus coralloides         | GreA/GreB family elongation factor [Coralloccoccus coralloides].         | GCF_000255295.1 |
| WP_015949235.1 | REase+TPR+GreAB-C+PIN*→                       | REase+TPR+GreAB-C+PIN        | 1112 | -        | Deltaproteobacteria | Desulfatibacillum aliphaticivorans | hypothetical protein [Desulfatibacillum aliphaticivorans].               | GCF_000021905.1 |
| WP_016083038.1 | TPR+PIN*→                                     | TPR+PIN                      | 1154 | -        | Firmicutes          | Bacillus cereus                    | hypothetical protein [Bacillus cereus].                                  | GCF_000399005.1 |
| WP_016796932.1 | TPR+GreAB-C+PIN*→                             | TPR+GreAB-C+PIN              | 1236 | -        | Gammaproteobacteria | Vibrio cyclitrophicus              | hypothetical protein [Vibrio cyclitrophicus].                            | GCF_000256385.2 |
| WP_016981456.1 | REase+TPR+GreAB-C+PIN*→                       | REase+TPR+GreAB-C+PIN        | 1113 | -        | Gammaproteobacteria | Pseudomonas amygdali               | hypothetical protein [Pseudomonas amygdali].                             | GCF_000275945.1 |
| WP_017010147.1 | TPR+GreAB-C+PIN*→                             | TPR+GreAB-C+PIN              | 1114 | -        | Gammaproteobacteria | Enterovibrio norvegicus            | hypothetical protein [Enterovibrio norvegicus].                          | GCF_000286875.2 |
| WP_017056082.1 | HetE-N1→ TPR+GreAB-C+PIN*→                    | TPR+GreAB-C+PIN              | 1088 | -        | Gammaproteobacteria | Vibrio kanaloae                    | hypothetical protein [Vibrio kanaloae].                                  | GCF_000272165.2 |
| WP_017278805.1 | TPR+GreAB-C+PIN*→                             | TPR+GreAB-C+PIN              | 1158 | -        | Gammaproteobacteria | Pseudomonas syringae               | hypothetical protein [Pseudomonas syringae].                             | GCF_001913215.1 |
| WP_017307658.1 | EAD10→?→?→ EAD10+TPR+GreAB-C+PIN*→            | EAD10+TPR+GreAB-C+PIN        | 1214 | -        | Cyanobacteria       | Fischerella sp. PCC 9339           | hypothetical protein [Fischerella sp. PCC 9339].                         | GCF_000315585.1 |
| WP_017684618.1 | REase+TPR+GreAB-C+PIN*→                       | REase+TPR+GreAB-C+PIN        | 1438 | -        | Gammaproteobacteria | Pseudomonas syringae               | hypothetical protein [Pseudomonas syringae].                             | GCF_000233815.1 |
| WP_017867504.1 | X+PIN*→                                       | X+PIN                        | 1207 | -        | Firmicutes          | Ligilactobacillus pobuzihii        | DUF4365 domain-containing protein [Ligilactobacillus pobuzihii].         | GCF_001433815.1 |
| WP_018464656.1 | TPR+PIN*→                                     | TPR+PIN                      | 1200 | -        | Bacteroidetes       | Prevotella paludivivens            | hypothetical protein [Prevotella paludivivens].                          | GCF_000613605.1 |
| WP_019086277.1 | REase+TPR+GreAB-C+PIN*→                       | REase+TPR+GreAB-C+PIN        | 1323 | -        | Alphaproteobacteria | Komagataeibacter europaeus         | tetratricopeptide repeat protein [Komagataeibacter europaeus].           | GCF_000285295.1 |
| WP_019092358.1 | REase+TPR+GreAB-C+PIN*→                       | REase+TPR+GreAB-C+PIN        | 1323 | -        | Alphaproteobacteria | Acetobacteraceae                   | MULTISPECIES: tetratricopeptide repeat protein [Acetobacteraceae].       | GCF_003850965.1 |
| WP_019865944.1 | HetE-N1→ TPR+GreAB-C+PIN*→                    | TPR+GreAB-C+PIN              | 1111 | -        | Gammaproteobacteria | Methylovulum miyakonense           | hypothetical protein [Methylovulum miyakonense].                         | GCF_000384075.1 |
| WP_019949723.1 | TPR+GreAB-C+PIN*→                             | TPR+GreAB-C+PIN              | 909  | -        | Bacteroidetes       | Hymenobacter aerophilus            | hypothetical protein [Hymenobacter aerophilus].                          | GCF_000382225.1 |
| WP_020099407.1 | TPR+PIN*→                                     | TPR+PIN                      | 1185 | -        | Actinobacteria      | Mycobacterium sp. 360MFTsu5.1      | hypothetical protein [Mycobacterium sp. 360MFTsu5.1].                    | GCF_000383495.1 |
| WP_020795266.1 | HetE-N1→ TPR+GreAB-C+PIN*→                    | TPR+GreAB-C+PIN              | 1112 | -        | Gammaproteobacteria | Pseudomonas sp. G5(2012)           | hypothetical protein [Pseudomonas sp. G5(2012)].                         | GCF_000408945.1 |
| WP_021554497.1 | HetE-N1→ TPR+GreAB-C+PIN*→                    | TPR+GreAB-C+PIN              | 1093 | -        | Gammaproteobacteria | Enterobacteriaceae                 | MULTISPECIES: hypothetical protein [Enterobacteriaceae].                 | GCF_002110225.1 |
| WP_021876213.1 | PIN*→                                         | PIN                          | 1097 | -        | Firmicutes          | Clostridium chauvoei               | tetratricopeptide repeat protein [Clostridium chauvoei].                 | GCF_002327205.1 |

| acc            | operon                                                 | architecture               | len  | gen.name | taxend              | species                         | define                                                                  | gca             |
|----------------|--------------------------------------------------------|----------------------------|------|----------|---------------------|---------------------------------|-------------------------------------------------------------------------|-----------------|
| WP_022388983.1 | X+PIN*→                                                | X+PIN                      | 1200 | -        | Firmicutes          | Blautia obeum                   | hypothetical protein [Blautia obeum].                                   | GCF_013299585.1 |
| WP_022619607.1 | TPR+GreAB-C+PIN*→                                      | TPR+GreAB-C+PIN            | 1069 | -        | Firmicutes          | Clostridioides difficile        | hypothetical protein [Clostridioides difficile].                        | GCF_000530295.1 |
| WP_022674357.1 | REase→?→ REase+TPR+GreAB-C+PIN*→                       | REase+TPR+GreAB-C+PIN      | 1290 | -        | Alphaproteobacteria | Novosphingopyxis baekryungensis | hypothetical protein [Novosphingopyxis baekryungensis].                 | GCF_000420305.1 |
| WP_024552132.1 | HNH→?→?→ HetE-N1→ TPR+GreAB-C+PIN*→                    | TPR+GreAB-C+PIN            | 1092 | -        | Gammaproteobacteria | Franconibacter helveticus       | hypothetical protein [Franconibacter helveticus].                       | GCF_000485945.1 |
| WP_024678816.1 | REase+TPR+GreAB-C+PIN*→                                | REase+TPR+GreAB-C+PIN      | 1317 | -        | Gammaproteobacteria | Pseudomonas syringae            | DUF4365 domain-containing protein [Pseudomonas syringae].               | GCF_000452685.1 |
| WP_024698051.1 | REase+TPR+GreAB-C+PIN*→                                | REase+TPR+GreAB-C+PIN      | 1438 | -        | Gammaproteobacteria | Pseudomonas avellanae           | hypothetical protein [Pseudomonas avellanae].                           | GCF_000452845.1 |
| WP_024925158.1 | REase+TPR+TPR+GreAB-C+PIN*→                            | REase+TPR+TPR+GreAB-C+PIN  | 1315 | -        | Alphaproteobacteria | Mesorhizobium                   | MULTISPECIES: GreA/GreB family elongation factor [Mesorhizobium].       | GCF_000568635.1 |
| WP_025240246.1 | REase+TOPC→ HetE-N1→ HetE-N1+TPR+GreAB-C+PIN*→         | HetE-N1+TPR+GreAB-C+PIN    | 952  | -        | Gammaproteobacteria | Pseudomonas stutzeri            | hypothetical protein [Pseudomonas stutzeri].                            | GCF_000590475.1 |
| WP_026105277.1 | TPR+GreAB-C+PIN*→                                      | TPR+GreAB-C+PIN            | 611  | -        | Alphaproteobacteria | Methylobacterium sp. MB200      | hypothetical protein [Methylobacterium sp. MB200].                      | GCF_000333655.1 |
| WP_026508802.1 | HEPN+SNF→?→?→?→ X+PIN*→?→ CITB-HTH+LexA-protease→      | X+PIN                      | 1212 | -        | Firmicutes          | Butyrivibrio sp. MC2013         | hypothetical protein [Butyrivibrio sp. MC2013].                         | GCF_000424585.1 |
| WP_026811785.1 | TPR+PIN*→                                              | TPR+PIN                    | 1261 | -        | Bacteroidetes       | Arenibacter certesii            | hypothetical protein [Arenibacter certesii].                            | GCF_000429545.1 |
| WP_027471277.1 | TPR+GreAB-C+PIN*→                                      | TPR+GreAB-C+PIN            | 1073 | -        | Bacteroidetes       | Saccharicrinis fermentans       | hypothetical protein [Saccharicrinis fermentans].                       | GCF_000517085.1 |
| WP_028048816.1 | HTH+PNPase+TPR+GreAB-C+PIN*→                           | HTH+PNPase+TPR+GreAB-C+PIN | 1518 | -        | Actinobacteria      | Cellulomonas sp. URHD0024       | helix-turn-helix domain-containing protein [Cellulomonas sp. URHD0024]. | GCF_000426185.1 |
| WP_029071033.1 | X+PIN*→                                                | X+PIN                      | 1212 | -        | Firmicutes          | Kandleria vitulina              | hypothetical protein [Kandleria vitulina].                              | GCF_000622125.1 |
| WP_029379391.1 | REase+TPR+GreAB-C+PIN*→                                | REase+TPR+GreAB-C+PIN      | 1438 | -        | Gammaproteobacteria | Pseudomonas fuscovaginae        | hypothetical protein [Pseudomonas fuscovaginae].                        | GCF_000251185.1 |
| WP_031437352.1 | REase+TPR+GreAB-C+PIN*→                                | REase+TPR+GreAB-C+PIN      | 1323 | -        | Gammaproteobacteria | Methylobacter tundripaludum     | DUF4365 domain-containing protein [Methylobacter tundripaludum].        | GCF_000733835.1 |
| WP_031445473.1 | TPR+GreAB-C+PIN*→                                      | TPR+GreAB-C+PIN            | 1244 | -        | Bacteroidetes       | Arenibacter algicola            | hypothetical protein [Arenibacter algicola].                            | GCF_000733925.1 |
| WP_031548868.1 | REase→ X+PIN*→?→?→?→?→?→ MACRODOMAIN→                  | X+PIN                      | 1209 | -        | Firmicutes          | Oribacterium sp. FC2011         | hypothetical protein [Oribacterium sp. FC2011].                         | GCF_000701645.1 |
| WP_032661435.1 | TPR+GreAB-C+PIN*→                                      | TPR+GreAB-C+PIN            | 1139 | -        | Gammaproteobacteria | Pseudomonas syringae            | hypothetical protein [Pseudomonas syringae].                            | GCF_000800685.1 |
| WP_032902625.1 | REase+TPR+GreAB-C+PIN*→                                | REase+TPR+GreAB-C+PIN      | 1438 | -        | Gammaproteobacteria | Pseudomonas                     | MULTISPECIES: hypothetical protein [Pseudomonas].                       | GCF_000511155.2 |
| WP_033132679.1 | HetE-N1→ TPR+GreAB-C+PIN*→                             | TPR+GreAB-C+PIN            | 1074 | -        | Gammaproteobacteria | Acinetobacter sp. MN12          | hypothetical protein [Acinetobacter sp. MN12].                          | GCF_000764915.1 |
| WP_033469897.1 | REase+TPR+GreAB-C+PIN*→                                | REase+TPR+GreAB-C+PIN      | 1282 | -        | Betaproteobacteria  | Bordetella bronchiseptica       | hypothetical protein [Bordetella bronchiseptica].                       | GCF_000690175.1 |
| WP_033736921.1 | HetE-N1→?→ TPR+GreAB-C+PIN*→                           | TPR+GreAB-C+PIN            | 760  | -        | Gammaproteobacteria | Pantoea sp. Sc1                 | hypothetical protein [Pantoea sp. Sc1].                                 | GCF_000255315.1 |
| WP_034127539.1 | TPR+GreAB-C+PIN*→                                      | TPR+GreAB-C+PIN            | 1158 | -        | Gammaproteobacteria | Pseudomonas fluorescens         | hypothetical protein [Pseudomonas fluorescens].                         | GCF_000801795.1 |
| WP_034129364.1 | REase+TPR+GreAB-C+PIN*→                                | REase+TPR+GreAB-C+PIN      | 1244 | -        | Gammaproteobacteria | Acinetobacter baumannii         | hypothetical protein [Acinetobacter baumannii].                         | GCF_000802915.1 |
| WP_034392332.1 | REase+TPR+GreAB-C+PIN*→                                | REase+TPR+GreAB-C+PIN      | 1413 | -        | Betaproteobacteria  | Delftia acidovorans             | hypothetical protein [Delftia acidovorans].                             | GCF_001598795.1 |
| WP_034708052.1 | HetE-N1→?→?→ GreAB-C+PIN*→                             | GreAB-C+PIN                | 575  | -        | Gammaproteobacteria | Acinetobacter bereziniae        | hypothetical protein [Acinetobacter bereziniae].                        | GCF_000368505.1 |
| WP_035460854.1 | HetE-N1→ TPR+GreAB-C+PIN*→                             | TPR+GreAB-C+PIN            | 1104 | -        | Gammaproteobacteria | unclassified Alcanivorax        | MULTISPECIES: hypothetical protein [unclassified Alcanivorax].          | GCF_000524665.1 |
| WP_035530189.1 | REase+TPR+GreAB-C+PIN*→                                | REase+TPR+GreAB-C+PIN      | 1332 | -        | Alphaproteobacteria | Hoeflea sp. BAL378              | hypothetical protein [Hoeflea sp. BAL378].                              | GCF_000759435.1 |
| WP_035646445.1 | REase+TPR+TPR+GreAB-C+PIN*→                            | REase+TPR+TPR+GreAB-C+PIN  | 1316 | -        | Alphaproteobacteria | Bradyrhizobium sp. ORS 285      | hypothetical protein [Bradyrhizobium sp. ORS 285].                      | GCF_000239755.1 |
| WP_036748977.1 | HetE-N1→ TPR+GreAB-C+PIN*→                             | TPR+GreAB-C+PIN            | 1130 | -        | Gammaproteobacteria | Photobacterium galathea         | hypothetical protein [Photobacterium galathea].                         | GCF_000695255.1 |
| WP_036783497.1 | HetE-N1→ TPR+GreAB-C+PIN*→                             | TPR+GreAB-C+PIN            | 1104 | -        | Gammaproteobacteria | Photorhabdus aegyptia           | hypothetical protein [Photorhabdus aegyptia].                           | GCF_000612035.1 |
| WP_038397119.1 | <-HTH<-?<-?  HetE-N1→ TPR+GreAB-C+PIN*→                | TPR+GreAB-C+PIN            | 1107 | -        | Gammaproteobacteria | Salmonella enterica             | hypothetical protein [Salmonella enterica].                             | GCF_000756465.1 |
| WP_039292971.1 | TPR+PIN*→                                              | TPR+PIN                    | 1180 | -        | Firmicutes          | Paenibacillus sp. IHB B 3415    | hypothetical protein [Paenibacillus sp. IHB B 3415].                    | GCF_000802655.2 |
| WP_039419134.1 | CHC2+Toprim-DNAG→?→?→?→ HTH→ SIG+TM→ TPR+GreAB-C+PIN*→ | TPR+GreAB-C+PIN            | 1140 | -        | Bacteroidetes       | Porphyromonas gulae             | hypothetical protein [Porphyromonas gulae].                             | GCF_000765945.1 |
| WP_039490314.1 | HetE-N1→ TPR+GreAB-C+PIN*→                             | TPR+GreAB-C+PIN            | 1093 | -        | Gammaproteobacteria | Pectobacterium odoriferum       | hypothetical protein [Pectobacterium odoriferum].                       | GCF_000754765.1 |
| WP_039768974.1 | REase+TPR+GreAB-C+PIN*→                                | REase+TPR+GreAB-C+PIN      | 1438 | -        | Gammaproteobacteria | Pseudomonas fluorescens         | hypothetical protein [Pseudomonas fluorescens].                         | GCF_000817905.1 |
| WP_040182639.1 | REase+TPR+GreAB-C+PIN*→                                | REase+TPR+GreAB-C+PIN      | 1319 | -        | Alphaproteobacteria | Phaeobacter sp. S60             | hypothetical protein [Phaeobacter sp. S60].                             | GCF_000826845.1 |
| WP_040439475.1 | REase+TPR+GreAB-C+PIN*→                                | REase+TPR+GreAB-C+PIN      | 1318 | -        | Alphaproteobacteria | Labrenzia aggregata             | hypothetical protein [Labrenzia aggregata].                             | GCF_000168975.1 |
| WP_041272554.1 | REase+TPR+GreAB-C+PIN*→                                | REase+TPR+GreAB-C+PIN      | 1294 | -        | Firmicutes          | Desulfitobacterium hafniense    | tetratricopeptide repeat protein [Desulfitobacterium hafniense].        | GCF_000010045.1 |

| acc            | operon                             | architecture              | len  | gen.name | taxend              | species                          | define                                                             | gca             |
|----------------|------------------------------------|---------------------------|------|----------|---------------------|----------------------------------|--------------------------------------------------------------------|-----------------|
| WP_041475188.1 | REase+TPR+GreAB-C+PIN*→            | REase+TPR+GreAB-C+PIN     | 1321 | -        | Gammaproteobacteria | Pseudomonas                      | MULTISPECIES: DUF4365 domain-containing protein [Pseudomonas].     | GCF_000012445.1 |
| WP_041609504.1 | HetE-N1→ TPR+GreAB-C+PIN*→         | TPR+GreAB-C+PIN           | 1086 | -        | Gammaproteobacteria | Tolumonas auensis                | hypothetical protein [Tolumonas auensis].                          | GCF_000023065.1 |
| WP_042089608.1 | REase+TPR+GreAB-C+PIN*→            | REase+TPR+GreAB-C+PIN     | 1245 | -        | Gammaproteobacteria | Acinetobacter bereziniae         | hypothetical protein [Acinetobacter bereziniae].                   | GCF_000825165.1 |
| WP_042562078.1 | REase+TPR+GreAB-C+PIN*→            | REase+TPR+GreAB-C+PIN     | 1438 | -        | Gammaproteobacteria | Pseudomonas fluorescens          | hypothetical protein [Pseudomonas fluorescens].                    | GCF_000827755.1 |
| WP_043355224.1 | REase+TPR+GreAB-C+PIN*→            | REase+TPR+GreAB-C+PIN     | 1332 | -        | Betaproteobacteria  | Cupriavidus                      | MULTISPECIES: hypothetical protein [Cupriavidus].                  | GCF_001652915.1 |
| WP_043626766.1 | REase+TPR+TPR+GreAB-C+PIN*→        | REase+TPR+TPR+GreAB-C+PIN | 1357 | -        | Alphaproteobacteria | Ensifer sp. ZNC0028              | hypothetical protein [Ensifer sp. ZNC0028].                        | GCF_000799055.1 |
| WP_043752287.1 | REase+TPR+GreAB-C+PIN*→            | REase+TPR+GreAB-C+PIN     | 1318 | -        | Alphaproteobacteria | Pseudoocenicola atlanticus       | restriction endonuclease [Pseudoocenicola atlanticus].             | GCF_000768315.1 |
| WP_044036524.1 | TPR→ TPR→?→?→ TPR+GreAB-C+PIN*→    | TPR+GreAB-C+PIN           | 473  | -        | Alphaproteobacteria | Octadecabacter arcticus          | hypothetical protein [Octadecabacter arcticus].                    | GCF_000155735.2 |
| WP_044439030.1 | X+PIN*→                            | X+PIN                     | 1051 | -        | Actinobacteria      | Agreia bicolorata                | hypothetical protein [Agreia bicolorata].                          | GCF_000938265.1 |
| WP_045324066.1 | TPR+PIN*→                          | TPR+PIN                   | 1167 | -        | Actinobacteria      | Streptomyces sp. NRRL F-4428     | hypothetical protein [Streptomyces sp. NRRL F-4428].               | GCF_000956015.1 |
| WP_045495160.1 | HetE-N1→ TPR+GreAB-C+PIN*→         | TPR+GreAB-C+PIN           | 1086 | -        | Gammaproteobacteria | Vibrio hyugaensis                | hypothetical protein [Vibrio hyugaensis].                          | GCF_000818475.1 |
| WP_046103485.1 | REase+TPR+GreAB-C+PIN*→            | REase+TPR+GreAB-C+PIN     | 1314 | -        | Alphaproteobacteria | Devosia chinhatensis             | hypothetical protein [Devosia chinhatensis].                       | GCF_000969445.1 |
| WP_047008502.1 | TPR+GreAB-C+PIN*→                  | TPR+GreAB-C+PIN           | 1236 | -        | -                   | Vibrio diabolicus                | hypothetical protein [Vibrio diabolicus].                          | GCF_001010935.1 |
| WP_047057492.1 | HetE-N1→ TPR+GreAB-C+PIN*→         | TPR+GreAB-C+PIN           | 1106 | -        | Gammaproteobacteria | Enterobacter hormaechei          | hypothetical protein [Enterobacter hormaechei].                    | GCF_001011695.1 |
| WP_047274590.1 | REase+TPR+GreAB-C+PIN*→            | REase+TPR+GreAB-C+PIN     | 1321 | -        | Gammaproteobacteria | Pseudomonas                      | MULTISPECIES: DUF4365 domain-containing protein [Pseudomonas].     | GCF_012986325.1 |
| WP_047583000.1 | HetE-N1→ TPR+GreAB-C+PIN*→         | TPR+GreAB-C+PIN           | 1105 | -        | Gammaproteobacteria | unclassified Pseudomonas         | MULTISPECIES: hypothetical protein [unclassified Pseudomonas].     | GCF_000763225.1 |
| WP_047736827.1 | HetE-N1→ HetE-N1+TPR+GreAB-C+PIN*→ | HetE-N1+TPR+GreAB-C+PIN   | 1122 | -        | Gammaproteobacteria | Pseudomonas chlororaphis         | hypothetical protein [Pseudomonas chlororaphis].                   | GCF_001023535.1 |
| WP_047738516.1 | HetE-N1→ TPR+GreAB-C+PIN*→         | TPR+GreAB-C+PIN           | 1111 | -        | Gammaproteobacteria | Pseudomonas chlororaphis         | hypothetical protein [Pseudomonas chlororaphis].                   | GCF_001023535.1 |
| WP_047741525.1 | HetE-N1→ TPR+GreAB-C+PIN*→         | TPR+GreAB-C+PIN           | 1106 | -        | Gammaproteobacteria | Enterobacter cloacae complex     | MULTISPECIES: hypothetical protein [Enterobacter cloacae complex]. | GCF_014982105.1 |
| WP_047744683.1 | HetE-N1→ HetE-N1+TPR+GreAB-C+PIN*→ | HetE-N1+TPR+GreAB-C+PIN   | 1092 | -        | Gammaproteobacteria | Enterobacter ludwigii            | hypothetical protein [Enterobacter ludwigii].                      | GCF_001022445.2 |
| WP_048126291.1 | TPR+GreAB-C+PIN*→                  | TPR+GreAB-C+PIN           | 1292 | -        | Euryarchaeota       | Methanosarcina lacustris         | hypothetical protein [Methanosarcina lacustris].                   | GCF_000970265.1 |
| WP_048377212.1 | REase+TPR+GreAB-C+PIN*→            | REase+TPR+GreAB-C+PIN     | 1321 | -        | Gammaproteobacteria | Pseudomonas                      | MULTISPECIES: DUF4365 domain-containing protein [Pseudomonas].     | GCF_012986365.1 |
| WP_048411963.1 | TPR+GreAB-C+PIN*→                  | TPR+GreAB-C+PIN           | 1163 | -        | Betaproteobacteria  | Chromobacterium sp. LK1          | hypothetical protein [Chromobacterium sp. LK1].                    | GCF_001043555.1 |
| WP_049042149.1 | HetE-N1→ HetE-N1+TPR+GreAB-C+PIN*→ | HetE-N1+TPR+GreAB-C+PIN   | 1094 | -        | Gammaproteobacteria | Citrobacter braakii              | hypothetical protein [Citrobacter braakii].                        | GCF_001059745.1 |
| WP_049582258.1 | HetE-N1→ TPR+GreAB-C+PIN*→         | TPR+GreAB-C+PIN           | 1098 | -        | Gammaproteobacteria | Photorhabdus luminescens         | hypothetical protein [Photorhabdus luminescens].                   | GCF_900102985.1 |
| WP_050091697.1 | HetE-N1→ TPR+GreAB-C+PIN*→         | TPR+GreAB-C+PIN           | 1096 | -        | Gammaproteobacteria | Yersinia pseudotuberculosis      | hypothetical protein [Yersinia pseudotuberculosis].                | GCF_001123345.1 |
| WP_050298251.1 | HetE-N1→ TPR+GreAB-C+PIN*→         | TPR+GreAB-C+PIN           | 1095 | -        | Gammaproteobacteria | Yersinia enterocolitica          | hypothetical protein [Yersinia enterocolitica].                    | GCF_001160345.1 |
| WP_050323220.1 | HetE-N1→ TPR+GreAB-C+PIN*→         | TPR+GreAB-C+PIN           | 1121 | -        | Gammaproteobacteria | Yersinia enterocolitica          | hypothetical protein [Yersinia enterocolitica].                    | GCF_001182365.1 |
| WP_050376143.1 | TPR+GreAB-C+PIN*→   <-HTH+HTH      | TPR+GreAB-C+PIN           | 872  | -        | Betaproteobacteria  | Burkholderia pseudomallei        | hypothetical protein [Burkholderia pseudomallei].                  | GCF_006538545.1 |
| WP_050590144.1 | REase+TPR+GreAB-C+PIN*→            | REase+TPR+GreAB-C+PIN     | 1423 | -        | Gammaproteobacteria | Pseudomonas sp. URM017WK12:112   | hypothetical protein [Pseudomonas sp. URM017WK12:112].             | GCF_000514395.1 |
| WP_051097719.1 | TPR+GreAB-C+PIN*→                  | TPR+GreAB-C+PIN           | 1140 | -        | Gammaproteobacteria | Pseudomonas sp. 10-1B            | hypothetical protein [Pseudomonas sp. 10-1B].                      | GCF_000935045.1 |
| WP_051560695.1 | HetE-N1→ TPR+GreAB-C+PIN*→         | TPR+GreAB-C+PIN           | 1098 | -        | Gammaproteobacteria | Photorhabdus aegyptia            | hypothetical protein [Photorhabdus aegyptia].                      | GCF_000612035.1 |
| WP_051570263.1 | REase+TPR+GreAB-C+PIN*→            | REase+TPR+GreAB-C+PIN     | 1248 | -        | Actinobacteria      | Cryptosporangium arvum           | DUF4365 domain-containing protein [Cryptosporangium arvum].        | GCF_000585375.1 |
| WP_052241169.1 | REase+TPR+GreAB-C+PIN*→            | REase+TPR+GreAB-C+PIN     | 1236 | -        | Actinobacteria      | Microbacterium hominis           | DUF4365 domain-containing protein [Microbacterium hominis].        | GCF_000813805.1 |
| WP_052515067.1 | PNPase+TPR+GreAB-C+PIN*→           | PNPase+TPR+GreAB-C+PIN    | 1617 | -        | Deltaproteobacteria | Dethiosulfatarculus sandiegensis | hypothetical protein [Dethiosulfatarculus sandiegensis].           | GCF_000931935.2 |
| WP_052917795.1 | HetE-N1→ TPR+GreAB-C+PIN*→         | TPR+GreAB-C+PIN           | 1094 | -        | Gammaproteobacteria | Escherichia coli                 | hypothetical protein [Escherichia coli].                           | GCF_001265885.1 |
| WP_053052653.1 | HetE-N1→ TPR+GreAB-C+PIN*→         | TPR+GreAB-C+PIN           | 1129 | -        | Gammaproteobacteria | Vibrio harveyi                   | hypothetical protein [Vibrio harveyi].                             | GCF_001262735.1 |
| WP_053269091.1 | REase+TPR+GreAB-C+PIN*→            | REase+TPR+GreAB-C+PIN     | 1438 | -        | Gammaproteobacteria | Pseudomonas chlororaphis         | hypothetical protein [Pseudomonas chlororaphis].                   | GCF_001269595.1 |
| WP_053316591.1 | TPR+GreAB-C+PIN*→                  | TPR+GreAB-C+PIN           | 982  | -        | Gammaproteobacteria | Vibrio parahaemolyticus          | hypothetical protein [Vibrio parahaemolyticus].                    | GCF_001268015.1 |
| WP_053446146.1 | TPR+PIN*→                          | TPR+PIN                   | 1160 | -        | Firmicutes          | Bacillus toyonensis              | hypothetical protein [Bacillus toyonensis].                        | GCF_001275045.2 |

| acc            | operon                                                  | architecture              | len  | gen.name | taxend              | species                                | define                                                                      | gca             |
|----------------|---------------------------------------------------------|---------------------------|------|----------|---------------------|----------------------------------------|-----------------------------------------------------------------------------|-----------------|
| WP_053882512.1 | HetE-N1→ TPR+GreAB-C+PIN*→                              | TPR+GreAB-C+PIN           | 1094 | -        | Gammaproteobacteria | Escherichia coli                       | hypothetical protein [Escherichia coli].                                    | GCF_001284445.1 |
| WP_054070021.1 | TPR+GreAB-C+PIN*→                                       | TPR+GreAB-C+PIN           | 1140 | -        | Gammaproteobacteria | Pseudomonas syringae group genomosp. 3 | hypothetical protein [Pseudomonas syringae group genomosp. 3].              | GCF_016803175.1 |
| WP_054211402.1 | BirA-HTH→ HEPN→ REase+TPR+TPR+GreAB-C+PIN*→             | REase+TPR+TPR+GreAB-C+PIN | 1333 | -        | Alphaproteobacteria | Bosea vaviloviae                       | hypothetical protein [Bosea vaviloviae].                                    | GCF_001298265.1 |
| WP_054464024.1 | HetE-N1→ TPR+GreAB-C+PIN*→                              | TPR+GreAB-C+PIN           | 1094 | -        | Gammaproteobacteria | Escherichia coli                       | hypothetical protein [Escherichia coli].                                    | GCF_001277455.1 |
| WP_055843189.1 | REase+TPR+GreAB-C+PIN*→                                 | REase+TPR+GreAB-C+PIN     | 1293 | -        | Alphaproteobacteria | Sphingomonas sp. Leaf343               | tetratricopeptide repeat protein [Sphingomonas sp. Leaf343].                | GCF_001423765.1 |
| WP_056497005.1 | TPR+GreAB-C+PIN*→                                       | TPR+GreAB-C+PIN           | 1110 | -        | Alphaproteobacteria | Methylobacterium sp. Leaf111           | hypothetical protein [Methylobacterium sp. Leaf111].                        | GCF_001423285.1 |
| WP_056734772.1 | TPR+PIN*→                                               | TPR+PIN                   | 1204 | -        | Actinobacteria      | Agromyces sp. Soil535                  | hypothetical protein [Agromyces sp. Soil535].                               | GCF_001428255.1 |
| WP_056836493.1 | TPR+PIN*→                                               | TPR+PIN                   | 1174 | -        | Firmicutes          | Paenibacillus sp. Soil787              | hypothetical protein [Paenibacillus sp. Soil787].                           | GCF_001429545.1 |
| WP_057430028.1 | REase+TPR+GreAB-C+PIN*→                                 | REase+TPR+GreAB-C+PIN     | 1438 | -        | Gammaproteobacteria | Pseudomonas syringae group genomosp. 3 | hypothetical protein [Pseudomonas syringae group genomosp. 3].              | GCF_001401385.1 |
| WP_057580842.1 | TPR+GreAB-C+PIN*→                                       | TPR+GreAB-C+PIN           | 1233 | -        | Firmicutes          | Paeniclostridium sordellii             | hypothetical protein [Paeniclostridium sordellii].                          | GCF_001373055.1 |
| WP_057657430.1 | REase+TPR+GreAB-C+PIN*→                                 | REase+TPR+GreAB-C+PIN     | 1287 | -        | Gammaproteobacteria | Pseudoxanthomonas dokdonensis          | tetratricopeptide repeat protein [Pseudoxanthomonas dokdonensis].           | GCF_001431405.1 |
| WP_057831910.1 | HetE-N1→ TPR+GreAB-C+PIN*→                              | TPR+GreAB-C+PIN           | 1091 | -        | Gammaproteobacteria | Colwellia sp. TT2012                   | hypothetical protein [Colwellia sp. TT2012].                                | GCF_001440345.1 |
| WP_057932289.1 | TPR+GreAB-C+PIN*→                                       | TPR+GreAB-C+PIN           | 1276 | -        | Bacteroidetes       | Pedobacter ginsenosidimutans           | tetratricopeptide repeat protein [Pedobacter ginsenosidimutans].            | GCF_001442625.1 |
| WP_058039540.1 | TPR+GreAB-C+PIN*→   <-HTH+HTH                           | TPR+GreAB-C+PIN           | 872  | -        | Betaproteobacteria  | Burkholderia pseudomallei              | hypothetical protein [Burkholderia pseudomallei].                           | GCF_001445875.1 |
| WP_058297418.1 | TPR+PIN*→                                               | TPR+PIN                   | 1225 | -        | Firmicutes          | Bacillus enclensis                     | hypothetical protein [Bacillus enclensis].                                  | GCF_900094975.1 |
| WP_058461037.1 | TPR+PIN*→                                               | TPR+PIN                   | 1277 | -        | Gammaproteobacteria | Fluoribacter bozemaniae                | hypothetical protein [Fluoribacter bozemaniae].                             | GCF_900640135.1 |
| WP_058587024.1 | <-MarR-HTH  ?→?→?→   <-?  ?→ HetE-N1→ TPR+GreAB-C+PIN*→ | TPR+GreAB-C+PIN           | 1117 | -        | Gammaproteobacteria | Citrobacter amalonaticus               | hypothetical protein [Citrobacter amalonaticus].                            | GCF_001471655.2 |
| WP_058721158.1 | REase+TPR+GreAB-C+PIN*→                                 | REase+TPR+GreAB-C+PIN     | 1509 | -        | Betaproteobacteria  | Paucibacter sp. KCTC 42545             | hypothetical protein [Paucibacter sp. KCTC 42545].                          | GCF_001477625.1 |
| WP_058751880.1 | REase+TPR+GreAB-C+PIN*→                                 | REase+TPR+GreAB-C+PIN     | 1317 | -        | Alphaproteobacteria | Sphingomonas sanguinis                 | tetratricopeptide repeat protein [Sphingomonas sanguinis].                  | GCF_001476905.1 |
| WP_058820070.1 | <-HTH<-?<-?  HetE-N1→ TPR+GreAB-C+PIN*→                 | TPR+GreAB-C+PIN           | 1107 | -        | Gammaproteobacteria | Salmonella enterica                    | hypothetical protein [Salmonella enterica].                                 | GCF_001952125.1 |
| WP_059294982.1 | HetE-N1→ TPR+GreAB-C+PIN*→                              | TPR+GreAB-C+PIN           | 1106 | -        | Gammaproteobacteria | Enterobacter hormaechei                | hypothetical protein [Enterobacter hormaechei].                             | GCF_001518595.1 |
| WP_059458986.1 | REase+TPR+GreAB-C+PIN*→                                 | REase+TPR+GreAB-C+PIN     | 1335 | -        | Betaproteobacteria  | Burkholderia vietnamiensis             | hypothetical protein [Burkholderia vietnamiensis].                          | GCF_001523785.1 |
| WP_059543415.1 | TPR+GreAB-C+PIN*→   <-HTH+HTH                           | TPR+GreAB-C+PIN           | 872  | -        | Betaproteobacteria  | Burkholderia                           | MULTISPECIES: hypothetical protein [Burkholderia].                          | GCF_001523065.1 |
| WP_059687512.1 | REase+TPR+GreAB-C+PIN*→                                 | REase+TPR+GreAB-C+PIN     | 1355 | -        | Betaproteobacteria  | Burkholderia cepacia                   | hypothetical protein [Burkholderia cepacia].                                | GCF_001524765.1 |
| WP_059702921.1 | REase+TPR→ TPR+GreAB-C+PIN*→                            | TPR+GreAB-C+PIN           | 954  | -        | Betaproteobacteria  | Burkholderia sp. RF2-non_BP3           | hypothetical protein [Burkholderia sp. RF2-non_BP3].                        | GCF_001522185.1 |
| WP_059764594.1 | REase+TPR+GreAB-C+PIN*→                                 | REase+TPR+GreAB-C+PIN     | 1321 | -        | Gammaproteobacteria | unclassified Pseudomonas               | MULTISPECIES: DUF4365 domain-containing protein [unclassified Pseudomonas]. | GCF_001529305.1 |
| WP_059837999.1 | TPR+GreAB-C+PIN*→   <-HTH+HTH                           | TPR+GreAB-C+PIN           | 872  | -        | Betaproteobacteria  | Burkholderia ubonensis                 | hypothetical protein [Burkholderia ubonensis].                              | GCF_001528175.1 |
| WP_059992407.1 | REase+TPR+GreAB-C+PIN*→                                 | REase+TPR+GreAB-C+PIN     | 1345 | -        | Betaproteobacteria  | Burkholderia ubonensis                 | hypothetical protein [Burkholderia ubonensis].                              | GCF_001527095.1 |
| WP_060002797.1 | TPR+GreAB-C+PIN*→                                       | TPR+GreAB-C+PIN           | 872  | -        | Betaproteobacteria  | Burkholderia gladioli                  | hypothetical protein [Burkholderia gladioli].                               | GCF_902831175.1 |
| WP_060217774.1 | REase+TPR+GreAB-C+PIN*→                                 | REase+TPR+GreAB-C+PIN     | 1355 | -        | Betaproteobacteria  | Burkholderia cepacia                   | hypothetical protein [Burkholderia cepacia].                                | GCF_001530905.1 |
| WP_060322122.1 | REase+TPR+GreAB-C+PIN*→                                 | REase+TPR+GreAB-C+PIN     | 1351 | -        | Betaproteobacteria  | Burkholderia ubonensis                 | hypothetical protein [Burkholderia ubonensis].                              | GCF_001718975.1 |
| WP_060322181.1 | REase+TPR+GreAB-C+PIN*→   <-HEPN                        | REase+TPR+GreAB-C+PIN     | 1345 | -        | Betaproteobacteria  | Burkholderia diffusa                   | hypothetical protein [Burkholderia diffusa].                                | GCF_001533185.1 |
| WP_060360485.1 | REase+TPR+GreAB-C+PIN*→   <-HEPN                        | REase+TPR+GreAB-C+PIN     | 1351 | -        | Betaproteobacteria  | Burkholderia territorii                | hypothetical protein [Burkholderia territorii].                             | GCF_001533385.1 |
| WP_061510730.1 | REase+TPR+GreAB-C+PIN*→                                 | REase+TPR+GreAB-C+PIN     | 1304 | -        | Alphaproteobacteria | Gluconobacter thailandicus             | hypothetical protein [Gluconobacter thailandicus].                          | GCF_001580835.1 |
| WP_061928567.1 | REase+TPR+GreAB-C+PIN*→                                 | REase+TPR+GreAB-C+PIN     | 1323 | -        | Alphaproteobacteria | Gluconobacter japonicus                | hypothetical protein [Gluconobacter japonicus].                             | GCF_001580865.1 |
| WP_062265952.1 | REase+TPR+GreAB-C+PIN*→                                 | REase+TPR+GreAB-C+PIN     | 1319 | -        | Euryarchaeota       | Methanoculleus bourgensis              | tetratricopeptide repeat protein [Methanoculleus bourgensis].               | GCF_900036045.1 |
| WP_062316067.1 | TPR+PIN*→                                               | TPR+PIN                   | 1207 | -        | Actinobacteria      | Demequina maris                        | hypothetical protein [Demequina maris].                                     | GCF_000971375.1 |
| WP_062477592.1 | HetE-N1→ TPR+GreAB-C+PIN*→                              | TPR+GreAB-C+PIN           | 1109 | -        | Gammaproteobacteria | Lacimicrobium alkaliphilum             | hypothetical protein [Lacimicrobium alkaliphilum].                          | GCF_001466725.1 |
| WP_062692005.1 | HetE-N1→ TPR+GreAB-C+PIN*→                              | TPR+GreAB-C+PIN           | 941  | -        | Gammaproteobacteria | Photobacterium sanguinicanri           | hypothetical protein [Photobacterium sanguinicanri].                        | GCF_001563765.1 |

| acc            | operon                                      | architecture              | len  | gen.name | taxend              | species                        | define                                                                                 | gca             |
|----------------|---------------------------------------------|---------------------------|------|----------|---------------------|--------------------------------|----------------------------------------------------------------------------------------|-----------------|
| WP_062794399.1 | REase+TPR+GreAB-C+PIN*→                     | REase+TPR+GreAB-C+PIN     | 1127 | -        | Betaproteobacteria  | Cupriavidus metallidurans      | hypothetical protein, partial [Cupriavidus metallidurans].                             | GCF_001598775.1 |
| WP_063146823.1 | HetE-N1→ TPR+GreAB-C+PIN*→                  | TPR+GreAB-C+PIN           | 1106 | -        | Gammaproteobacteria | Enterobacter cloacae complex   | MULTISPECIES: hypothetical protein [Enterobacter cloacae complex].                     | GCF_013635495.1 |
| WP_063496996.1 | TIR+DnaB→ REase+TPR+GreAB-C+PIN*→           | REase+TPR+GreAB-C+PIN     | 1364 | -        | Betaproteobacteria  | Paraburkholderia phytofirmans  | hypothetical protein [Paraburkholderia phytofirmans].                                  | GCF_001634365.1 |
| WP_063800929.1 | REase+TPR+GreAB-C+PIN*→                     | REase+TPR+GreAB-C+PIN     | 1351 | -        | Betaproteobacteria  | Burkholderia ubonensis         | hypothetical protein [Burkholderia ubonensis].                                         | GCF_001526225.1 |
| WP_063809712.1 | HetE-N1→ TPR+GreAB-C+PIN*→                  | TPR+GreAB-C+PIN           | 1117 | -        | Gammaproteobacteria | Salmonella enterica            | hypothetical protein [Salmonella enterica].                                            | GCF_008727555.1 |
| WP_063897359.1 | REase+TPR+GreAB-C+PIN*→                     | REase+TPR+GreAB-C+PIN     | 1351 | -        | Betaproteobacteria  | Burkholderia ubonensis         | hypothetical protein [Burkholderia ubonensis].                                         | GCF_001529725.1 |
| WP_063906337.1 | REase+TPR+GreAB-C+PIN*→                     | REase+TPR+GreAB-C+PIN     | 1354 | -        | Betaproteobacteria  | Burkholderia ubonensis         | hypothetical protein [Burkholderia ubonensis].                                         | GCF_001534425.1 |
| WP_063932878.1 | HetE-N1→ TPR+GreAB-C+PIN*→                  | TPR+GreAB-C+PIN           | 1034 | -        | Gammaproteobacteria | Enterobacter hormaechei        | hypothetical protein [Enterobacter hormaechei].                                        | GCF_900076145.1 |
| WP_064273010.1 | REase+TPR+GreAB-C+PIN*→                     | REase+TPR+GreAB-C+PIN     | 1328 | -        | Alphaproteobacteria | Gluconobacter cerinus          | tetratricopeptide repeat protein [Gluconobacter cerinus].                              | GCF_001645165.1 |
| WP_064374215.1 | HetE-N1→ TPR+GreAB-C+PIN*→                  | TPR+GreAB-C+PIN           | 1116 | -        | Gammaproteobacteria | Pantoea ananatis               | hypothetical protein [Pantoea ananatis].                                               | GCF_001543055.1 |
| WP_064477497.1 | TPR+GreAB-C+PIN*→                           | TPR+GreAB-C+PIN           | 879  | -        | Betaproteobacteria  | Ralstonia                      | MULTISPECIES: hypothetical protein [Ralstonia].                                        | GCF_014884725.1 |
| WP_065176860.1 | HetE-N1→ GreAB-C*→                          | GreAB-C                   | 1123 | -        | Gammaproteobacteria | Photobacterium aquimaris       | hypothetical protein [Photobacterium aquimaris].                                       | GCF_001676065.1 |
| WP_065192964.1 | HetE-N1→ GreAB-C*→                          | GreAB-C                   | 1128 | -        | Gammaproteobacteria | Photobacterium phosphoreum     | hypothetical protein [Photobacterium phosphoreum].                                     | GCF_001676135.1 |
| WP_065645553.1 | HetE-N1→ TPR+GreAB-C+PIN*→                  | TPR+GreAB-C+PIN           | 1085 | -        | Gammaproteobacteria | Vibrio diabolicus              | hypothetical protein [Vibrio diabolicus].                                              | GCF_001691185.1 |
| WP_065663920.1 | BirA-HTH→ HEPN→ REase+TPR+TPR+GreAB-C+PIN*→ | REase+TPR+TPR+GreAB-C+PIN | 1333 | -        | Alphaproteobacteria | Agrobacterium sp. B131/95      | GreA/GreB family elongation factor [Agrobacterium sp. B131/95].                        | GCF_001692155.1 |
| WP_065996373.1 | REase+TPR+GreAB-C+PIN*→                     | REase+TPR+GreAB-C+PIN     | 1244 | -        | Gammaproteobacteria | Acinetobacter baumannii        | hypothetical protein [Acinetobacter baumannii].                                        | GCF_001704675.1 |
| WP_066036869.1 | TPR+PIN*→                                   | TPR+PIN                   | 1175 | -        | Firmicutes          | Lysinibacillus sp. AR18-8      | hypothetical protein [Lysinibacillus sp. AR18-8].                                      | GCF_001705465.1 |
| WP_066542710.1 | REase+TPR+GreAB-C+PIN*→                     | REase+TPR+GreAB-C+PIN     | 1122 | -        | Alphaproteobacteria | Sphingomonas sp. CCH18-B1      | tetratricopeptide repeat protein [Sphingomonas sp. CCH18-B1].                          | GCF_001555895.1 |
| WP_066945120.1 | HTH+PNPase+PIN*→                            | HTH+PNPase+PIN            | 1527 | -        | Actinobacteria      | Streptomyces lushanensis       | 5'-methylthioadenosine/S-adenosylhomocysteine nucleosidase [Streptomyces lushanensis]. | GCF_001700515.1 |
| WP_067386574.1 | REase+TPR+GreAB-C+PIN*→                     | REase+TPR+GreAB-C+PIN     | 1361 | -        | Gammaproteobacteria | Marinobacterium aestuarii      | hypothetical protein [Marinobacterium aestuarii].                                      | GCF_001651805.1 |
| WP_067584887.1 | GreAB-C*→                                   | GreAB-C                   | 1154 | -        | Gammaproteobacteria | Endozoicomonas ascidiicola     | hypothetical protein [Endozoicomonas ascidiicola].                                     | GCF_001646955.1 |
| WP_067776912.1 | PNPase+TPR+GreAB-C+PIN*→                    | PNPase+TPR+GreAB-C+PIN    | 1386 | -        | Cyanobacteria       | Nostoc sp. NIES-3756           | hypothetical protein [Nostoc sp. NIES-3756].                                           | GCF_001548375.1 |
| WP_067990948.1 | TPR+PIN*→   <-KAP_NTPase                    | TPR+PIN                   | 1216 | -        | Actinobacteria      | Mycobacterium sp. YC-RL4       | hypothetical protein [Mycobacterium sp. YC-RL4].                                       | GCF_001644575.1 |
| WP_068215362.1 | TPR+GreAB-C+PIN*→                           | TPR+GreAB-C+PIN           | 1166 | -        | Bacteroidetes       | Roseivirga spongicola          | hypothetical protein [Roseivirga spongicola].                                          | GCF_001592965.1 |
| WP_069047857.1 | REase+TPR+GreAB-C+PIN*→                     | REase+TPR+GreAB-C+PIN     | 1383 | -        | Betaproteobacteria  | Hydrogenophaga sp. RAC07       | hypothetical protein [Hydrogenophaga sp. RAC07].                                       | GCF_001713375.1 |
| WP_069206296.1 | REase+TPR+GreAB-C+PIN*→                     | REase+TPR+GreAB-C+PIN     | 1323 | -        | Alphaproteobacteria | Sphingomonas panacis           | hypothetical protein [Sphingomonas panacis].                                           | GCF_001717955.1 |
| WP_069604736.1 | TPR+GreAB-C+PIN*→                           | TPR+GreAB-C+PIN           | 1147 | -        | Firmicutes          | Bacillus cereus group          | MULTISPECIES: tetratricopeptide repeat protein [Bacillus cereus group].                | GCF_001729295.1 |
| WP_069859257.1 | TPR+GreAB-C+PIN*→                           | TPR+GreAB-C+PIN           | 1244 | -        | Bacteroidetes       | Arenibacter sp. NBRC 103722    | hypothetical protein [Arenibacter sp. NBRC 103722].                                    | GCF_001748465.2 |
| WP_069931472.1 | REase+PIN*→                                 | REase+PIN                 | 1282 | -        | Actinobacteria      | Streptomyces agglomeratus      | DUF4365 domain-containing protein [Streptomyces agglomeratus].                         | GCF_001746465.1 |
| WP_070715046.1 | HetE-N1→ TPR+GreAB-C+PIN*→                  | TPR+GreAB-C+PIN           | 1094 | -        | Gammaproteobacteria | Hafnia sp. HMSC23F03           | hypothetical protein [Hafnia sp. HMSC23F03].                                           | GCF_001816025.1 |
| WP_070991866.1 | HetE-N1→ TPR+GreAB-C+PIN*→                  | TPR+GreAB-C+PIN           | 1106 | -        | Gammaproteobacteria | Pseudoalteromonas byunsanensis | hypothetical protein [Pseudoalteromonas byunsanensis].                                 | GCF_001854475.1 |
| WP_071234936.1 | HetE-N1→ TPR+GreAB-C+PIN*→                  | TPR+GreAB-C+PIN           | 1111 | -        | Gammaproteobacteria | Vibrio rotiferianus            | hypothetical protein [Vibrio rotiferianus].                                            | GCF_001858245.1 |
| WP_071684330.1 | HetE-N1→ HetE-N1+TPR+GreAB-C+PIN*→          | HetE-N1+TPR+GreAB-C+PIN   | 1094 | -        | Gammaproteobacteria | Citrobacter freundii           | hypothetical protein [Citrobacter freundii].                                           | GCF_014901875.1 |
| WP_071741873.1 | TPR+PIN*→                                   | TPR+PIN                   | 1160 | -        | Firmicutes          | Bacillus paranthracis          | hypothetical protein [Bacillus paranthracis].                                          | GCF_001883995.1 |
| WP_071769547.1 | PIN*→                                       | PIN                       | 341  | -        | Betaproteobacteria  | Burkholderia ubonensis         | hypothetical protein [Burkholderia ubonensis].                                         | GCF_001882755.1 |
| WP_071890709.1 | TPR+GreAB-C+PIN*→   <-HTH                   | TPR+GreAB-C+PIN           | 1157 | -        | Gammaproteobacteria | Pseudomonas putida             | tetratricopeptide repeat protein [Pseudomonas putida].                                 | GCF_001886975.1 |
| WP_072702162.1 | TPR+GreAB-C+PIN*→                           | TPR+GreAB-C+PIN           | 1125 | -        | Alphaproteobacteria | Donghicola eburneus            | hypothetical protein [Donghicola eburneus].                                            | GCF_900095785.1 |

| acc            | operon                                                    | architecture               | len  | gen.name | taxend                | species                        | define                                                            | gca             |
|----------------|-----------------------------------------------------------|----------------------------|------|----------|-----------------------|--------------------------------|-------------------------------------------------------------------|-----------------|
| WP_073552134.1 | TPR+GreAB-C+PIN*→                                         | TPR+GreAB-C+PIN            | 1131 | -        | Bacteroidetes         | Elizabethkingia meningoseptica | hypothetical protein [Elizabethkingia meningoseptica].            | GCF_900143665.1 |
| WP_073772512.1 | REase+PIN*→                                               | REase+PIN                  | 1292 | -        | Actinobacteria        | Streptomyces sp. MJM1172       | DUF4365 domain-containing protein [Streptomyces sp. MJM1172].     | GCF_001905425.1 |
| WP_074449514.1 | CHC2+Toprim-DNAG→?→?→?→ HTH→ SIG+TM→ TPR+GreAB-C+PIN*→    | TPR+GreAB-C+PIN            | 1141 | -        | Bacteroidetes         | Tannerella forsythia           | hypothetical protein [Tannerella forsythia].                      | GCF_900096735.1 |
| WP_074452850.1 | CHC2+Toprim-DNAG→?→ PSE→?→ HTH→ SIG+TM→ TPR+GreAB-C+PIN*→ | TPR+GreAB-C+PIN            | 1141 | -        | Bacteroidetes         | Bacteroidales                  | MULTISPECIES: hypothetical protein [Bacteroidales].               | GCF_900096725.1 |
| WP_074647048.1 | TPR+GreAB-C+PIN*→                                         | TPR+GreAB-C+PIN            | 1184 | -        | Alphaproteobacteria   | Celeribacter baekdonensis      | hypothetical protein [Celeribacter baekdonensis].                 | GCF_900102315.1 |
| WP_074661038.1 | TPR+GreAB-C+PIN*→                                         | TPR+GreAB-C+PIN            | 1127 | -        | Bacteroidetes         | Flavobacterium frigidimaris    | hypothetical protein [Flavobacterium frigidimaris].               | GCF_002217275.1 |
| WP_074804411.1 | REase+TPR+GreAB-C+PIN*→                                   | REase+TPR+GreAB-C+PIN      | 1335 | -        | Betaproteobacteria    | Burkholderia cenocepacia       | hypothetical protein [Burkholderia cenocepacia].                  | GCF_900100915.1 |
| WP_074854446.1 | TPR+GreAB-C+PIN*→                                         | TPR+GreAB-C+PIN            | 1161 | -        | Gammaproteobacteria   | Pseudomonas salomonii          | hypothetical protein [Pseudomonas salomonii].                     | GCF_900107155.1 |
| WP_075042282.1 | REase+TPR+TPR+GreAB-C+PIN*→                               | REase+TPR+TPR+GreAB-C+PIN  | 1332 | -        | Alphaproteobacteria   | Brucella intermedia            | GreA/GreB family elongation factor [Brucella intermedia].         | GCF_001917355.1 |
| WP_075481088.1 | TPR+GreAB-C+PIN*→                                         | TPR+GreAB-C+PIN            | 1236 | -        | Gammaproteobacteria   | Moritella viscosa              | hypothetical protein [Moritella viscosa].                         | GCF_900120145.1 |
| WP_075594884.1 | REase+TPR+GreAB-C+PIN*→                                   | REase+TPR+GreAB-C+PIN      | 1086 | -        | Alphaproteobacteria   | Komagataeibacter hansenii      | hypothetical protein [Komagataeibacter hansenii].                 | GCF_001938745.1 |
| WP_076004144.1 | REase+TPR+GreAB-C+PIN*→                                   | REase+TPR+GreAB-C+PIN      | 1301 | -        | Chloroflexi           | Dehalogenimonas formicexedens  | hypothetical protein [Dehalogenimonas formicexedens].             | GCF_001953175.1 |
| WP_076215124.1 | TPR+PIN*→                                                 | TPR+PIN                    | 1179 | -        | Firmicutes            | Paenibacillus odorifer         | tetratricopeptide repeat protein [Paenibacillus odorifer].        | GCF_001954655.1 |
| WP_076272073.1 | TPR+PIN*→                                                 | TPR+PIN                    | 1180 | -        | Firmicutes            | Paenibacillus odorifer         | hypothetical protein [Paenibacillus odorifer].                    | GCF_001954285.1 |
| WP_076387298.1 | TPR+GreAB-C+PIN*→                                         | TPR+GreAB-C+PIN            | 1130 | -        | Bacteroidetes         | Kaistella chaponensis          | hypothetical protein [Kaistella chaponensis].                     | GCF_900156725.1 |
| WP_076506278.1 | TPR+GreAB-C+PIN*→                                         | TPR+GreAB-C+PIN            | 1137 | -        | Bacteroidetes         | Chryseobacterium shigense      | hypothetical protein [Chryseobacterium shigense].                 | GCF_900156575.1 |
| WP_076822916.1 | REase+TPR+GreAB-C+PIN*→                                   | REase+TPR+GreAB-C+PIN      | 1162 | -        | Actinobacteria        | Frankia asymbiotica            | hypothetical protein [Frankia asymbiotica].                       | GCF_001983105.1 |
| WP_076832171.1 | TPR+GreAB-C+PIN*→                                         | TPR+GreAB-C+PIN            | 1129 | -        | Alphaproteobacteria   | Bradyrhizobium sp. UFLA 03-321 | hypothetical protein [Bradyrhizobium sp. UFLA 03-321].            | GCF_001969825.1 |
| WP_076835387.1 | REase+TPR+GreAB-C+PIN*→                                   | REase+TPR+GreAB-C+PIN      | 1345 | -        | Betaproteobacteria    | Burkholderia pseudomallei      | hypothetical protein [Burkholderia pseudomallei].                 | GCF_001980695.1 |
| WP_078005484.1 | TPR+GreAB-C+PIN*→                                         | TPR+GreAB-C+PIN            | 1131 | -        | Bacteroidetes         | Flavobacterium sp. KBS0721     | hypothetical protein [Flavobacterium sp. KBS0721].                | GCF_002007065.3 |
| WP_078350655.1 | TPR+GreAB-C+PIN*→                                         | TPR+GreAB-C+PIN            | 1286 | -        | Bacteroidetes         | Mucilagibacter pedocola        | hypothetical protein [Mucilagibacter pedocola].                   | GCF_002013915.1 |
| WP_078403924.1 | TPR+GreAB-C+PIN*→                                         | TPR+GreAB-C+PIN            | 1140 | -        | Bacteroidetes         | Elizabethkingia ursingii       | hypothetical protein [Elizabethkingia ursingii].                  | GCF_002022125.1 |
| WP_078946818.1 | REase+PIN*→                                               | REase+PIN                  | 1277 | -        | Actinobacteria        | Streptomyces sp. NRRL B-3648   | DUF4365 domain-containing protein [Streptomyces sp. NRRL B-3648]. | GCF_001279545.1 |
| WP_079454673.1 | REase+TPR+GreAB-C+PIN*→   <-?  HTH→                       | REase+TPR+GreAB-C+PIN      | 1250 | -        | Gammaproteobacteria   | Acinetobacter baumannii        | GreA/GreB family elongation factor [Acinetobacter baumannii].     | GCF_902728005.1 |
| WP_079469502.1 | TPR+GreAB-C+PIN*→                                         | TPR+GreAB-C+PIN            | 1234 | -        | Bacteroidetes         | Chitinophaga ginsengisegetis   | hypothetical protein [Chitinophaga ginsengisegetis].              | GCF_900168065.1 |
| WP_079579807.1 | X+PIN*→                                                   | X+PIN                      | 1007 | -        | Epsilonproteobacteria | Malaciobacter marinus          | hypothetical protein [Malaciobacter marinus].                     | GCF_900168035.1 |
| WP_079820569.1 | HetE-N1→ TPR+GreAB-C+PIN*→                                | TPR+GreAB-C+PIN            | 1117 | -        | Gammaproteobacteria   | Salmonella enterica            | hypothetical protein [Salmonella enterica].                       | GCF_016071195.1 |
| WP_079943789.1 | <-HTH<-?<-?  HetE-N1→ TPR+GreAB-C+PIN*→                   | TPR+GreAB-C+PIN            | 998  | -        | Gammaproteobacteria   | Salmonella enterica            | hypothetical protein [Salmonella enterica].                       | GCF_002045995.1 |
| WP_079951728.1 | <-HTH<-?<-?  HetE-N1→ TPR+GreAB-C+PIN*→                   | TPR+GreAB-C+PIN            | 993  | -        | Gammaproteobacteria   | Salmonella enterica            | hypothetical protein [Salmonella enterica].                       | GCF_002052255.1 |
| WP_079954008.1 | <-HTH<-?<-?  HetE-N1→ TPR+GreAB-C+PIN*→                   | TPR+GreAB-C+PIN            | 998  | -        | Gammaproteobacteria   | Salmonella enterica            | hypothetical protein [Salmonella enterica].                       | GCF_002045095.1 |
| WP_079959318.1 | HetE-N1→ TPR+GreAB-C+PIN*→                                | TPR+GreAB-C+PIN            | 1119 | -        | Gammaproteobacteria   | Salmonella enterica            | hypothetical protein [Salmonella enterica].                       | GCF_002046115.1 |
| WP_079973127.1 | <-HTH<-?<-?  HetE-N1→ TPR+GreAB-C+PIN*→                   | TPR+GreAB-C+PIN            | 1106 | -        | Gammaproteobacteria   | Salmonella enterica            | hypothetical protein [Salmonella enterica].                       | GCF_002046215.1 |
| WP_080170163.1 | HetE-N1→ TPR+GreAB-C+PIN*→                                | TPR+GreAB-C+PIN            | 1106 | -        | Gammaproteobacteria   | Salmonella enterica            | hypothetical protein [Salmonella enterica].                       | GCF_016863875.1 |
| WP_080323117.1 | REase+TPR+GreAB-C+PIN*→                                   | REase+TPR+GreAB-C+PIN      | 1334 | -        | Betaproteobacteria    | Burkholderia cenocepacia       | hypothetical protein [Burkholderia cenocepacia].                  | GCF_002071875.1 |
| WP_080865316.1 | PIN+GNAT→?→?→ REase+TPR+GreAB-C+PIN*→                     | REase+TPR+GreAB-C+PIN      | 1290 | -        | Alphaproteobacteria   | Agrobacterium tumefaciens      | hypothetical protein [Agrobacterium tumefaciens].                 | GCF_900012605.1 |
| WP_081143626.1 | TPR+PIN*→                                                 | TPR+PIN                    | 1157 | -        | Firmicutes            | Bacillus cereus                | hypothetical protein [Bacillus cereus].                           | GCF_002078195.1 |
| WP_082055264.1 | NACHT→ REase+TPR+GreAB-C+PIN*→                            | REase+TPR+GreAB-C+PIN      | 1329 | -        | Betaproteobacteria    | Cupriavidus basilensis         | DUF4365 domain-containing protein [Cupriavidus basilensis].       | GCF_000832305.1 |
| WP_082573822.1 | HTH+PNPase+TPR+GreAB-C+PIN*→                              | HTH+PNPase+TPR+GreAB-C+PIN | 1517 | -        | Actinobacteria        | Cellulomonas sp. Root137       | hypothetical protein [Cellulomonas sp. Root137].                  | GCF_001426725.1 |

| acc            | operon                                           | architecture              | len  | gen.name | taxend              | species                      | define                                                                          | gca             |
|----------------|--------------------------------------------------|---------------------------|------|----------|---------------------|------------------------------|---------------------------------------------------------------------------------|-----------------|
| WP_082991752.1 | REase+TPR+GreAB-C+PIN*→                          | REase+TPR+GreAB-C+PIN     | 1320 | -        | Betaproteobacteria  | Paraburkholderia tropica     | DUF4365 domain-containing protein [Paraburkholderia tropica].                   | GCF_001673675.1 |
| WP_083024260.1 | TPR+GreAB-C*→                                    | TPR+GreAB-C               | 833  | -        | Gammaproteobacteria | Halomonas lionensis          | hypothetical protein [Halomonas lionensis].                                     | GCF_002087295.1 |
| WP_083366146.1 | HetE-N1→ TPR+GreAB-C+PIN*→                       | TPR+GreAB-C+PIN           | 1112 | -        | Gammaproteobacteria | Pseudomonas koreensis        | hypothetical protein [Pseudomonas koreensis].                                   | GCF_014646955.1 |
| WP_083417785.1 | REase+TPR+GreAB-C+PIN*→   <-TIR                  | REase+TPR+GreAB-C+PIN     | 1329 | -        | Betaproteobacteria  | Burkholderia contaminans     | DUF4365 domain-containing protein [Burkholderia contaminans].                   | GCF_001865715.1 |
| WP_083925131.1 | TPR+GreAB-C+PIN*→                                | TPR+GreAB-C+PIN           | 1307 | -        | Gammaproteobacteria | Thioalkalivibrio sp. ALJ15   | GreA/GreB family elongation factor [Thioalkalivibrio sp. ALJ15].                | GCF_000383695.1 |
| WP_084371210.1 | X+PIN*→                                          | X+PIN                     | 1158 | -        | Bacteroidetes       | Reichenbachiella faecimaris  | hypothetical protein [Reichenbachiella faecimaris].                             | GCF_900176375.1 |
| WP_084886264.1 | TPR+GreAB-C+PIN*→                                | TPR+GreAB-C+PIN           | 999  | -        | Gammaproteobacteria | Pantoea septica              | hypothetical protein [Pantoea septica].                                         | GCF_002095575.1 |
| WP_085383443.1 | REase+TPR+GreAB-C+PIN*→                          | REase+TPR+GreAB-C+PIN     | 1301 | -        | Alphaproteobacteria | Bradyrhizobium canariense    | hypothetical protein [Bradyrhizobium canariense].                               | GCF_002108905.1 |
| WP_085905967.1 | TPR+GreAB-C+PIN*→                                | TPR+GreAB-C+PIN           | 1176 | -        | Alphaproteobacteria | Kiloniella majae             | hypothetical protein [Kiloniella majae].                                        | GCF_002118275.1 |
| WP_086630532.1 | HetE-N1→ TPR+GreAB-C+PIN+TM+TM*→                 | TPR+GreAB-C+PIN+TM+TM     | 1106 | -        | Gammaproteobacteria | Klebsiella aerogenes         | hypothetical protein [Klebsiella aerogenes].                                    | GCF_002152925.1 |
| WP_086759874.1 | APATPase+BetaPropeller→ PNPase+TPR+GreAB-C+PIN*→ | PNPase+TPR+GreAB-C+PIN    | 1399 | -        | Cyanobacteria       | Nostoc sp. 106C              | tetratricopeptide repeat protein [Nostoc sp. 106C].                             | GCF_002154725.1 |
| WP_086979350.1 | HetE-N1→ TPR+GreAB-C+PIN*→                       | TPR+GreAB-C+PIN           | 940  | -        | Gammaproteobacteria | Pseudomonas putida           | hypothetical protein [Pseudomonas putida].                                      | GCF_002157515.1 |
| WP_087258361.1 | TPR+GreAB-C+PIN*→                                | TPR+GreAB-C+PIN           | 1189 | -        | Firmicutes          | [Clostridium] spiroforme     | hypothetical protein [[Clostridium] spiroforme].                                | GCF_002160695.1 |
| WP_087391814.1 | TPR+GreAB-C+PIN*→                                | TPR+GreAB-C+PIN           | 1189 | -        | Firmicutes          | [Clostridium] spiroforme     | hypothetical protein [[Clostridium] spiroforme].                                | GCF_002160645.1 |
| WP_088070184.1 | TPR+PIN*→                                        | TPR+PIN                   | 1157 | -        | Firmicutes          | Bacillus thuringiensis       | hypothetical protein [Bacillus thuringiensis].                                  | GCF_002148155.1 |
| WP_088082523.1 | TPR+PIN*→                                        | TPR+PIN                   | 1179 | -        | Firmicutes          | Bacillus thuringiensis       | hypothetical protein [Bacillus thuringiensis].                                  | GCF_002147935.1 |
| WP_088087080.1 | TPR+PIN*→                                        | TPR+PIN                   | 1176 | -        | Firmicutes          | Bacillus sp. OV166           | hypothetical protein [Bacillus sp. OV166].                                      | GCF_900177675.1 |
| WP_088476259.1 | REase+TPR+GreAB-C+PIN*→                          | REase+TPR+GreAB-C+PIN     | 1284 | -        | Gammaproteobacteria | Stenotrophomonas pavanii     | GreA/GreB family elongation factor [Stenotrophomonas pavanii].                  | GCF_002205885.1 |
| WP_089172847.1 | BirA-HTH→ HEPN→ REase+TPR+TPR+GreAB-C+PIN*→      | REase+TPR+TPR+GreAB-C+PIN | 1332 | -        | Alphaproteobacteria | unclassified Bosea           | MULTISPECIES: hypothetical protein [unclassified Bosea].                        | GCF_002220095.1 |
| WP_090371407.1 | REase→ TPR+GreAB-C+PIN*→                         | TPR+GreAB-C+PIN           | 1155 | -        | Betaproteobacteria  | Nitrosospira sp. N15         | hypothetical protein [Nitrosospira sp. N15].                                    | GCF_900102495.1 |
| WP_090455730.1 | HetE-N1→ TPR+GreAB-C+PIN*→   <-TIR               | TPR+GreAB-C+PIN           | 1112 | -        | Gammaproteobacteria | Pseudomonas jessenii         | hypothetical protein [Pseudomonas jessenii].                                    | GCF_900104905.1 |
| WP_090543864.1 | TIR+TPR+GreAB-C+PIN*→                            | TIR+TPR+GreAB-C+PIN       | 1348 | -        | Betaproteobacteria  | Nitrosomonas sp. Nm132       | toll/interleukin-1 receptor domain-containing protein [Nitrosomonas sp. Nm132]. | GCF_900100485.1 |
| WP_090721286.1 | <-Cas_Cas1<-?  ?→?→?→?→ REase+TPR+GreAB-C+PIN*→  | REase+TPR+GreAB-C+PIN     | 1380 | -        | Betaproteobacteria  | Nitrosomonas sp. Nm166       | hypothetical protein [Nitrosomonas sp. Nm166].                                  | GCF_900112825.1 |
| WP_091343709.1 | HetE-N1→ TPR+GreAB-C+PIN*→                       | TPR+GreAB-C+PIN           | 1098 | -        | Gammaproteobacteria | Alkalimonas amylytica        | hypothetical protein [Alkalimonas amylytica].                                   | GCF_900107845.1 |
| WP_091456057.1 | REase+TPR+GreAB-C+PIN*→                          | REase+TPR+GreAB-C+PIN     | 1259 | -        | Actinobacteria      | Micromonospora inyonensis    | hypothetical protein [Micromonospora inyonensis].                               | GCF_900091415.1 |
| WP_091965577.1 | TPR+GreAB-C+PIN*→                                | TPR+GreAB-C+PIN           | 1229 | -        | Alphaproteobacteria | Bradyrhizobium shewense      | hypothetical protein [Bradyrhizobium shewense].                                 | GCF_900094605.1 |
| WP_092226352.1 | TPR+GreAB-C+PIN*→                                | TPR+GreAB-C+PIN           | 1306 | -        | Alphaproteobacteria | Bradyrhizobium sp. Gha       | tetratricopeptide repeat protein [Bradyrhizobium sp. Gha].                      | GCF_900113735.1 |
| WP_092234200.1 | REase+TPR+GreAB-C+PIN*→                          | REase+TPR+GreAB-C+PIN     | 1321 | -        | Gammaproteobacteria | Pseudomonas proteolytica     | DUF4365 domain-containing protein [Pseudomonas proteolytica].                   | GCF_900105955.1 |
| WP_092689872.1 | HTH→ HetE-N1→ TPR+GreAB-C+PIN*→                  | TPR+GreAB-C+PIN           | 1077 | -        | Gammaproteobacteria | Acinetobacter kyonggiensis   | hypothetical protein [Acinetobacter kyonggiensis].                              | GCF_900107285.1 |
| WP_093257662.1 | HetE-N1→ HetE-N1+TPR+GreAB-C+PIN*→               | HetE-N1+TPR+GreAB-C+PIN   | 1120 | -        | Gammaproteobacteria | Pseudomonas                  | MULTISPECIES: hypothetical protein [Pseudomonas].                               | GCF_900110545.1 |
| WP_093289087.1 | REase+TPR+GreAB-C+PIN*→                          | REase+TPR+GreAB-C+PIN     | 1291 | -        | Gammaproteobacteria | Pseudoxanthomonas sp. CF125  | hypothetical protein [Pseudoxanthomonas sp. CF125].                             | GCF_900104085.1 |
| WP_095032727.1 | HetE-N1→ TPR+GreAB-C+PIN*→                       | TPR+GreAB-C+PIN           | 1104 | -        | Gammaproteobacteria | Klebsiella quasivariicola    | hypothetical protein [Klebsiella quasivariicola].                               | GCF_002269255.1 |
| WP_095064594.1 | HetE-N1→ TPR+GreAB-C+PIN*→                       | TPR+GreAB-C+PIN           | 1105 | -        | Gammaproteobacteria | Pseudomonas sp. Irchel s3f19 | hypothetical protein [Pseudomonas sp. Irchel s3f19].                            | GCF_900187555.1 |
| WP_095490577.1 | HetE-N1→ HetE-N1+TPR+GreAB-C+PIN*→               | HetE-N1+TPR+GreAB-C+PIN   | 1088 | -        | Gammaproteobacteria | Vibrio cholerae              | hypothetical protein [Vibrio cholerae].                                         | GCF_002284425.1 |
| WP_095570744.1 | HetE-N1→ TPR+GreAB-C+PIN*→                       | TPR+GreAB-C+PIN           | 1086 | -        | Gammaproteobacteria | Vibrio coralliilyticus       | hypothetical protein [Vibrio coralliilyticus].                                  | GCF_002286405.1 |
| WP_095743432.1 | REase+TPR+GreAB-C+PIN*→                          | REase+TPR+GreAB-C+PIN     | 1300 | -        | Betaproteobacteria  | Variovorax boronicumulans    | hypothetical protein [Variovorax boronicumulans].                               | GCF_002291405.1 |
| WP_096138380.1 | REase+TPR+GreAB-C+PIN*→                          | REase+TPR+GreAB-C+PIN     | 1321 | -        | Gammaproteobacteria | Pseudomonas syringae         | DUF4365 domain-containing protein [Pseudomonas syringae].                       | GCF_002318715.1 |
| WP_096145332.1 | PIN*→                                            | PIN                       | 1088 | -        | Firmicutes          | Clostridium chauvoei         | tetratricopeptide repeat protein [Clostridium chauvoei].                        | GCF_002327185.1 |
| WP_096360261.1 | REase+TPR+GreAB-C+PIN*→                          | REase+TPR+GreAB-C+PIN     | 2100 | -        | Gammaproteobacteria | Sulfuricaulis limicola       | hypothetical protein [Sulfuricaulis limicola].                                  | GCF_002355735.1 |

| acc            | operon                                 | architecture            | len  | gen.name | taxend              | species                      | define                                                           | gca             |
|----------------|----------------------------------------|-------------------------|------|----------|---------------------|------------------------------|------------------------------------------------------------------|-----------------|
| WP_096444074.1 | HetE-N1→ TPR+GreAB-C+PIN*→             | TPR+GreAB-C+PIN         | 1088 | -        | Gammaproteobacteria | Vibrio mediterranei          | hypothetical protein [Vibrio mediterranei].                      | GCF_002995655.1 |
| WP_096819326.1 | REase+TPR+GreAB-C+PIN*→                | REase+TPR+GreAB-C+PIN   | 1424 | -        | Gammaproteobacteria | Pseudomonas fluorescens      | tetratricopeptide repeat protein [Pseudomonas fluorescens].      | GCF_002417665.1 |
| WP_096985931.1 | HetE-N1→ TPR+GreAB-C+PIN*→             | TPR+GreAB-C+PIN         | 1094 | -        | Gammaproteobacteria | Escherichia coli             | hypothetical protein [Escherichia coli].                         | GCF_013372365.1 |
| WP_097373330.1 | PIN*→                                  | PIN                     | 245  | -        | Alphaproteobacteria | Celeribacter manganoxidans   | hypothetical protein [Celeribacter manganoxidans].               | GCF_002504165.1 |
| WP_097730210.1 | HetE-N1→ TPR+GreAB-C+PIN*→             | TPR+GreAB-C+PIN         | 1094 | -        | Gammaproteobacteria | Escherichia coli             | hypothetical protein [Escherichia coli].                         | GCF_002535535.1 |
| WP_097759664.1 | HetE-N1→ TPR+GreAB-C+PIN*→             | TPR+GreAB-C+PIN         | 1094 | -        | Gammaproteobacteria | Escherichia coli             | hypothetical protein [Escherichia coli].                         | GCF_002538945.1 |
| WP_097979402.1 | TPR+PIN*→                              | TPR+PIN                 | 1217 | -        | Firmicutes          | Bacillus toyonensis          | hypothetical protein [Bacillus toyonensis].                      | GCF_002552775.1 |
| WP_098090392.1 | HetE-N1→ TPR+GreAB-C+PIN*→             | TPR+GreAB-C+PIN         | 1101 | -        | Gammaproteobacteria | Pseudomonas putida           | hypothetical protein [Pseudomonas putida].                       | GCF_002554535.1 |
| WP_098280847.1 | TPR+PIN*→                              | TPR+PIN                 | 1183 | -        | Firmicutes          | Bacillus cereus              | hypothetical protein [Bacillus cereus].                          | GCF_002560075.1 |
| WP_098365372.1 | TPR+PIN*→                              | TPR+PIN                 | 1217 | -        | Firmicutes          | Bacillus cereus              | hypothetical protein [Bacillus cereus].                          | GCF_002561575.1 |
| WP_098420086.1 | TPR+PIN*→                              | TPR+PIN                 | 1183 | -        | Firmicutes          | Bacillus cereus              | hypothetical protein [Bacillus cereus].                          | GCF_002562505.1 |
| WP_098433845.1 | TPR+PIN*→                              | TPR+PIN                 | 1184 | -        | Firmicutes          | Priestia megaterium          | hypothetical protein [Priestia megaterium].                      | GCF_002564705.1 |
| WP_098573825.1 | TPR+GreAB-C+PIN*→                      | TPR+GreAB-C+PIN         | 1147 | -        | Firmicutes          | Bacillus wiedmannii          | tetratricopeptide repeat protein [Bacillus wiedmannii].          | GCF_002568785.1 |
| WP_098687609.1 | TPR+PIN*→                              | TPR+PIN                 | 1157 | -        | Firmicutes          | Bacillus toyonensis          | hypothetical protein [Bacillus toyonensis].                      | GCF_002571615.1 |
| WP_099262235.1 | REase+TPR+GreAB-C+PIN*→                | REase+TPR+GreAB-C+PIN   | 1243 | -        | Planctomycetes      | Rhodopirellula bahusiensis   | GreA/GreB family elongation factor [Rhodopirellula bahusiensis]. | GCF_002727185.1 |
| WP_099438436.1 | TPR+GreAB-C+PIN*→                      | TPR+GreAB-C+PIN         | 1252 | -        | Bacteroidetes       | Pedobacter ginsengisoli      | hypothetical protein [Pedobacter ginsengisoli].                  | GCF_002736205.1 |
| WP_100140263.1 | HetE-N1→ TPR+GreAB-C+PIN*→             | TPR+GreAB-C+PIN         | 1066 | -        | Betaproteobacteria  | Snodgrassella alvi           | hypothetical protein [Snodgrassella alvi].                       | GCF_002777775.1 |
| WP_100151648.1 | HetE-N1→ TPR+GreAB-C+PIN*→             | TPR+GreAB-C+PIN         | 1066 | -        | Betaproteobacteria  | Snodgrassella alvi           | hypothetical protein [Snodgrassella alvi].                       | GCF_002777655.1 |
| WP_100344325.1 | REase+TPR+GreAB-C+PIN*→                | REase+TPR+GreAB-C+PIN   | 1215 | -        | Actinobacteria      | Compostimonas suwonensis     | DUF4365 domain-containing protein [Compostimonas suwonensis].    | GCF_002797855.1 |
| WP_100632757.1 | REase+TPR+GreAB-C+PIN*→                | REase+TPR+GreAB-C+PIN   | 1321 | -        | Gammaproteobacteria | Pseudomonas qingdaonensis    | DUF4365 domain-containing protein [Pseudomonas qingdaonensis].   | GCF_002806685.1 |
| WP_101291505.1 | HetE-N1→ TPR+GreAB-C+PIN*→             | TPR+GreAB-C+PIN         | 1094 | -        | Gammaproteobacteria | Escherichia coli             | hypothetical protein [Escherichia coli].                         | GCF_002843705.1 |
| WP_102155042.1 | REase+TPR+GreAB-C+PIN*→                | REase+TPR+GreAB-C+PIN   | 1270 | -        | Alphaproteobacteria | Tsuneonella flava            | GreA/GreB family elongation factor [Tsuneonella flava].          | GCF_002870965.1 |
| WP_102488850.1 | HetE-N1→ HetE-N1+TPR+GreAB-C+PIN*→     | HetE-N1+TPR+GreAB-C+PIN | 1088 | -        | Gammaproteobacteria | Vibrio splendidus            | hypothetical protein [Vibrio splendidus].                        | GCF_002875305.1 |
| WP_102520861.1 | HetE-N1→ TPR+GreAB-C+PIN*→             | TPR+GreAB-C+PIN         | 1088 | -        | Gammaproteobacteria | Shewanella sp. 10N.286.48.A6 | hypothetical protein [Shewanella sp. 10N.286.48.A6].             | GCF_002873135.1 |
| WP_102570991.1 | HetE-N1→ TPR+GreAB-C+PIN*→             | TPR+GreAB-C+PIN         | 1088 | -        | Gammaproteobacteria | Vibrio splendidus            | hypothetical protein [Vibrio splendidus].                        | GCF_002875585.1 |
| WP_102574526.1 | HetE-N1→ TPR+GreAB-C+PIN*→             | TPR+GreAB-C+PIN         | 1116 | -        | Gammaproteobacteria | Vibrio splendidus            | hypothetical protein [Vibrio splendidus].                        | GCF_002877195.1 |
| WP_102576920.1 | HetE-N1→ HetE-N1+TPR+GreAB-C+PIN*→     | HetE-N1+TPR+GreAB-C+PIN | 1091 | -        | Gammaproteobacteria | Vibrio splendidus            | hypothetical protein [Vibrio splendidus].                        | GCF_002877345.1 |
| WP_103206664.1 | TPR+GreAB-C+PIN*→                      | TPR+GreAB-C+PIN         | 1213 | -        | Actinobacteria      | Microbacterium testaceum     | hypothetical protein [Microbacterium testaceum].                 | GCF_002899925.1 |
| WP_103448257.1 | REase+TPR+GreAB-C+PIN*→                | REase+TPR+GreAB-C+PIN   | 1421 | -        | Gammaproteobacteria | Pseudomonas                  | MULTISPECIES: hypothetical protein [Pseudomonas].                | GCF_015680835.1 |
| WP_103712798.1 | REase+TPR+GreAB-C+PIN*→   <-KAP_NTPase | REase+TPR+GreAB-C+PIN   | 1321 | -        | Gammaproteobacteria | Pseudomonas syringae         | DUF4365 domain-containing protein [Pseudomonas syringae].        | GCF_002916275.1 |
| WP_103713374.1 | HetE-N1→ TPR+GreAB-C+PIN*→             | TPR+GreAB-C+PIN         | 1107 | -        | Gammaproteobacteria | Pseudomonas syringae         | hypothetical protein [Pseudomonas syringae].                     | GCF_002917155.1 |
| WP_103715293.1 | TPR+GreAB-C+PIN*→                      | TPR+GreAB-C+PIN         | 1131 | -        | Bacteroidetes       | Flavobacterium columnare     | hypothetical protein [Flavobacterium columnare].                 | GCF_002916795.1 |
| WP_103949560.1 | HetE-N1→ HetE-N1+TPR+GreAB-C+PIN*→     | HetE-N1+TPR+GreAB-C+PIN | 1094 | -        | Gammaproteobacteria | Lelliottia                   | MULTISPECIES: hypothetical protein [Lelliottia].                 | GCF_002922995.1 |
| WP_104189366.1 | HetE-N1→ TPR+GreAB-C+PIN*→             | TPR+GreAB-C+PIN         | 1110 | -        | Gammaproteobacteria | unclassified Pantoea         | MULTISPECIES: hypothetical protein [unclassified Pantoea].       | GCF_002928355.1 |
| WP_104723186.1 | REase+TPR+GreAB-C+PIN*→                | REase+TPR+GreAB-C+PIN   | 1321 | -        | Gammaproteobacteria | Pseudomonas syringae         | DUF4365 domain-containing protein [Pseudomonas syringae].        | GCF_900235865.1 |
| WP_104925436.1 | HetE-N1→ TPR+GreAB-C+PIN*→             | TPR+GreAB-C+PIN         | 1118 | -        | Gammaproteobacteria | Rahnella sp. ERMR1:05        | hypothetical protein [Rahnella sp. ERMR1:05].                    | GCF_002951615.1 |
| WP_105080712.1 | HetE-N1→ TPR+GreAB-C+PIN*→             | TPR+GreAB-C+PIN         | 1111 | -        | Gammaproteobacteria | Pantoea                      | MULTISPECIES: hypothetical protein [Pantoea].                    | GCF_017920435.1 |
| WP_105696567.1 | REase+TPR+GreAB-C+PIN*→                | REase+TPR+GreAB-C+PIN   | 1321 | -        | Gammaproteobacteria | Pseudomonas poae             | DUF4365 domain-containing protein [Pseudomonas poae].            | GCF_002980135.1 |
| WP_105730942.1 | REase+TPR+GreAB-C+PIN*→                | REase+TPR+GreAB-C+PIN   | 1344 | -        | Betaproteobacteria  | Malikia spinosa              | hypothetical protein [Malikia spinosa].                          | GCF_002980625.1 |
| WP_105731559.1 | REase+TPR+GreAB-C+PIN*→                | REase+TPR+GreAB-C+PIN   | 1278 | -        | Alphaproteobacteria | Ochrobactrum sp. MYb29       | hypothetical protein [Ochrobactrum sp. MYb29].                   | GCF_002979345.1 |

| acc            | operon                                            | architecture               | len  | gen.name | taxend                | species                           | define                                                             | gca             |
|----------------|---------------------------------------------------|----------------------------|------|----------|-----------------------|-----------------------------------|--------------------------------------------------------------------|-----------------|
| WP_105794455.1 | REase+TPR+GreAB-C+PIN*→                           | REase+TPR+GreAB-C+PIN      | 1351 | -        | Betaproteobacteria    | Burkholderia multivorans          | hypothetical protein [Burkholderia multivorans].                   | GCF_002981485.1 |
| WP_106098487.1 | SIG+TM→ TPR+GreAB-C+PIN*→                         | TPR+GreAB-C+PIN            | 1129 | -        | Bacteroidetes         | Capnocytophaga sp. oral taxon 878 | hypothetical protein [Capnocytophaga sp. oral taxon 878].          | GCF_002999135.1 |
| WP_106374900.1 | HetE-N1→ TPR+GreAB-C+PIN*→                        | TPR+GreAB-C+PIN            | 1145 | -        | Gammaproteobacteria   | Halomonas songnenensis            | hypothetical protein [Halomonas songnenensis].                     | GCF_003002925.1 |
| WP_106946809.1 | TPR+GreAB-C+PIN*→                                 | TPR+GreAB-C+PIN            | 1155 | -        | Alphaproteobacteria   | Bradyrhizobium sp. MOS002         | hypothetical protein [Bradyrhizobium sp. MOS002].                  | GCF_003020115.1 |
| WP_107027340.1 | REase+TPR+TPR+GreAB-C+PIN*→                       | REase+TPR+TPR+GreAB-C+PIN  | 1357 | -        | Alphaproteobacteria   | Ensifer sp. NM-2                  | hypothetical protein [Ensifer sp. NM-2].                           | GCF_003024455.1 |
| WP_107248740.1 | HetE-N1→ GreAB-C*→                                | GreAB-C                    | 1128 | -        | Gammaproteobacteria   | Photobacterium kishitanii         | hypothetical protein [Photobacterium kishitanii].                  | GCF_003025535.1 |
| WP_107289369.1 | HetE-N1→ GreAB-C*→                                | GreAB-C                    | 1164 | -        | Gammaproteobacteria   | Photobacterium kishitanii         | hypothetical protein [Photobacterium kishitanii].                  | GCF_003025915.1 |
| WP_107901223.1 | TPR+PIN*→                                         | TPR+PIN                    | 1216 | -        | Firmicutes            | Bacillus sp. OV186                | hypothetical protein [Bacillus sp. OV186].                         | GCF_003053645.1 |
| WP_108393929.1 | HetE-N1→ TPR+GreAB-C+PIN*→                        | TPR+GreAB-C+PIN            | 1106 | -        | Gammaproteobacteria   | Enterobacter hormaechei           | hypothetical protein [Enterobacter hormaechei].                    | GCF_003056805.1 |
| WP_108462916.1 | REase+TPR+TPR+GreAB-C+PIN*→                       | REase+TPR+TPR+GreAB-C+PIN  | 1323 | -        | Alphaproteobacteria   | Devosia naphthalenivorans         | GreA/GreB family elongation factor [Devosia naphthalenivorans].    | GCF_003056355.1 |
| WP_108677990.1 | HetE-N1→ HetE-N1+TPR+GreAB-C+PIN*→                | HetE-N1+TPR+GreAB-C+PIN    | 1088 | -        | Gammaproteobacteria   | Vibrio vulnificus                 | hypothetical protein [Vibrio vulnificus].                          | GCF_011754395.1 |
| WP_108816955.1 | REase+TPR+GreAB-C+PIN*→                           | REase+TPR+GreAB-C+PIN      | 1311 | -        | Alphaproteobacteria   | Loktanella sp. Alg231-35          | hypothetical protein [Loktanella sp. Alg231-35].                   | GCF_900143545.1 |
| WP_109158749.1 | X+PIN*→                                           | X+PIN                      | 1041 | -        | Epsilonproteobacteria | Aliarcobacter skirrowii           | hypothetical protein [Aliarcobacter skirrowii].                    | GCF_003122145.1 |
| WP_109211325.1 | REase+TPR+GreAB-C+PIN*→                           | REase+TPR+GreAB-C+PIN      | 1211 | -        | Actinobacteria        | Microbacterium                    | MULTISPECIES: DUF4365 domain-containing protein [Microbacterium].  | GCF_015278315.1 |
| WP_109426752.1 | TPR→ TPR+GreAB-C+PIN*→   <-?  HTH→                | TPR+GreAB-C+PIN            | 494  | -        | Gammaproteobacteria   | Acinetobacter baumannii           | GreA/GreB family elongation factor [Acinetobacter baumannii].      | GCF_013416255.1 |
| WP_109802449.1 | TPR+PIN*→                                         | TPR+PIN                    | 1203 | -        | Actinobacteria        | Micromonospora sp. 4G51           | hypothetical protein [Micromonospora sp. 4G51].                    | GCF_003172935.1 |
| WP_109937286.1 | HetE-N1→ HetE-N1+TPR+GreAB-C+PIN*→                | HetE-N1+TPR+GreAB-C+PIN    | 1123 | -        | Gammaproteobacteria   | Pseudomonas sp. RW407             | hypothetical protein [Pseudomonas sp. RW407].                      | GCF_003176655.1 |
| WP_109950172.1 | REase+TPR+GreAB-C+PIN*→                           | REase+TPR+GreAB-C+PIN      | 1332 | -        | -                     | Methylobacterium sp. 17Sr1-43     | hypothetical protein [Methylobacterium sp. 17Sr1-43].              | GCF_003173735.1 |
| WP_109967732.1 | PNPase+TPR+GreAB-C+PIN*→                          | PNPase+TPR+GreAB-C+PIN     | 1415 | -        | Euryarchaeota         | Methanospirillum lacunae          | hypothetical protein [Methanospirillum lacunae].                   | GCF_003173355.1 |
| WP_110317339.1 | HTH+PNPase+TPR+GreAB-C+PIN*→                      | HTH+PNPase+TPR+GreAB-C+PIN | 1518 | -        | Actinobacteria        | Mycolicibacterium moriokaense     | hypothetical protein [Mycolicibacterium moriokaense].              | GCF_003201655.1 |
| WP_110434863.1 | HetE-N1→ TPR+GreAB-C+PIN*→                        | TPR+GreAB-C+PIN            | 950  | -        | Gammaproteobacteria   | Gilliamella apicola               | hypothetical protein [Gilliamella apicola].                        | GCF_003202655.1 |
| WP_110455267.1 | HetE-N1→ TPR+GreAB-C+PIN*→                        | TPR+GreAB-C+PIN            | 1126 | -        | Gammaproteobacteria   | Gilliamella apicola               | hypothetical protein [Gilliamella apicola].                        | GCF_003202815.1 |
| WP_110459582.1 | HetE-N1→ HetE-N1+TPR+GreAB-C+PIN*→                | HetE-N1+TPR+GreAB-C+PIN    | 1107 | -        | Gammaproteobacteria   | Pseudomonas syringae              | hypothetical protein [Pseudomonas syringae].                       | GCF_003202975.1 |
| WP_110575159.1 | HetE-N1→ HetE-N1+TPR+GreAB-C+PIN*→?→ MACRODOMAIN→ | HetE-N1+TPR+GreAB-C+PIN    | 1099 | -        | Gammaproteobacteria   | Marinomonas alcarazii             | hypothetical protein [Marinomonas alcarazii].                      | GCF_003208215.1 |
| WP_110766563.1 | REase+TPR+GreAB-C+PIN*→   <-KAP_NTPase            | REase+TPR+GreAB-C+PIN      | 1321 | -        | Gammaproteobacteria   | Pseudomonas syringae              | DUF4365 domain-containing protein [Pseudomonas syringae].          | GCF_003205895.1 |
| WP_110818130.1 | TPR+GreAB-C+PIN*→                                 | TPR+GreAB-C+PIN            | 1140 | -        | Gammaproteobacteria   | Pseudomonas syringae              | hypothetical protein [Pseudomonas syringae].                       | GCF_003205965.1 |
| WP_111087282.1 | REase+TPR+GreAB-C+PIN*→                           | REase+TPR+GreAB-C+PIN      | 1208 | -        | Actinobacteria        | Curtobacterium sp. MCLR17_055     | DUF4365 domain-containing protein [Curtobacterium sp. MCLR17_055]. | GCF_003234305.1 |
| WP_112353670.1 | TPR+GreAB-C+PIN*→                                 | TPR+GreAB-C+PIN            | 1235 | -        | Gammaproteobacteria   | Shewanella benthica               | hypothetical protein [Shewanella benthica].                        | GCF_900476435.1 |
| WP_112921055.1 | HNH→?→?→ PSE→ TPR+GreAB-C+PIN*→                   | TPR+GreAB-C+PIN            | 1092 | -        | Gammaproteobacteria   | Escherichia coli                  | hypothetical protein [Escherichia coli].                           | GCF_003292515.1 |
| WP_114150230.1 | TPR+GreAB-C+PIN*→?→?   <-?  ?→ PAIREDC-HTH→       | TPR+GreAB-C+PIN            | 900  | -        | Gammaproteobacteria   | Acinetobacter baumannii           | GreA/GreB family elongation factor [Acinetobacter baumannii].      | GCF_017726575.1 |
| WP_114915524.1 | TPR+PIN*→                                         | TPR+PIN                    | 1187 | -        | Firmicutes            | Oceanobacillus zhaokaii           | hypothetical protein [Oceanobacillus zhaokaii].                    | GCF_003352005.1 |
| WP_115015610.1 | HetE-N1→ TPR+GreAB-C+PIN*→                        | TPR+GreAB-C+PIN            | 1087 | -        | Gammaproteobacteria   | Shewanella putrefaciens           | hypothetical protein [Shewanella putrefaciens].                    | GCF_900457065.1 |
| WP_115596495.1 | TPR+GreAB-C+PIN*→?→?   <-?  ?→ PAIREDC-HTH→       | TPR+GreAB-C+PIN            | 756  | -        | Gammaproteobacteria   | Acinetobacter baumannii           | GreA/GreB family elongation factor [Acinetobacter baumannii].      | GCF_900444745.1 |
| WP_116227219.1 | HetE-N1→ TPR+GreAB-C+PIN*→                        | TPR+GreAB-C+PIN            | 1121 | -        | Gammaproteobacteria   | Pectobacterium aquaticum          | hypothetical protein [Pectobacterium aquaticum].                   | GCF_003382595.2 |
| WP_116600438.1 | REase+TPR+GreAB-C+PIN*→                           | REase+TPR+GreAB-C+PIN      | 1438 | -        | Gammaproteobacteria   | Pseudomonas sp. HMWF011           | hypothetical protein [Pseudomonas sp. HMWF011].                    | GCF_003094675.1 |
| WP_116893902.1 | TPR+GreAB-C+PIN*→                                 | TPR+GreAB-C+PIN            | 1158 | -        | Gammaproteobacteria   | Pseudomonas syringae              | hypothetical protein [Pseudomonas syringae].                       | GCF_003412595.1 |
| WP_116994473.1 | REase+TPR+GreAB-C+PIN*→                           | REase+TPR+GreAB-C+PIN      | 1327 | -        | Betaproteobacteria    | Duganella sp. BJB476              | hypothetical protein [Duganella sp. BJB476].                       | GCF_003416895.1 |
| WP_117157406.1 | HetE-N1→ TPR+GreAB-C+PIN*→                        | TPR+GreAB-C+PIN            | 1117 | -        | Gammaproteobacteria   | Enterobacteriaceae                | MULTISPECIES: hypothetical protein [Enterobacteriaceae].           | GCF_017814635.1 |
| WP_117181470.1 | REase+TPR+GreAB-C+PIN*→                           | REase+TPR+GreAB-C+PIN      | 1438 | -        | Gammaproteobacteria   | Pseudomonas cichorii              | hypothetical protein [Pseudomonas cichorii].                       | GCF_003416755.1 |

| acc            | operon                                                    | architecture            | len  | gen.name | taxend                | species                                | define                                                                                     | gca             |
|----------------|-----------------------------------------------------------|-------------------------|------|----------|-----------------------|----------------------------------------|--------------------------------------------------------------------------------------------|-----------------|
| WP_117831329.1 | HEPN+SNF→?→?→?→ X+PIN*→                                   | X+PIN                   | 1212 | -        | Firmicutes            | Roseburia sp. TF10-5                   | hypothetical protein [Roseburia sp. TF10-5].                                               | GCF_003462365.1 |
| WP_118235377.1 | X+PIN*→                                                   | X+PIN                   | 1200 | -        | Firmicutes            | Blautia obeum                          | hypothetical protein [Blautia obeum].                                                      | GCF_003470555.1 |
| WP_118282562.1 | X+PIN*→?→ CITB-HTH+LexA-protease→                         | X+PIN                   | 1212 | -        | Firmicutes            | Roseburia sp. AM16-25                  | hypothetical protein [Roseburia sp. AM16-25].                                              | GCF_003473825.1 |
| WP_118371145.1 | X+PIN*→                                                   | X+PIN                   | 1200 | -        | Firmicutes            | Lachnospira eligens                    | hypothetical protein [Lachnospira eligens].                                                | GCF_003474735.1 |
| WP_118468213.1 | Mbetalac→ Trypsin+TPR+PIN*→                               | Trypsin+TPR+PIN         | 1933 | -        | Firmicutes            | unclassified Clostridium               | MULTISPECIES: trypsin-like peptidase domain-containing protein [unclassified Clostridium]. | GCF_003477925.1 |
| WP_118891177.1 | REase+TPR+GreAB-C+PIN*→                                   | REase+TPR+GreAB-C+PIN   | 1327 | -        | Betaproteobacteria    | Ralstonia solanacearum                 | DUF4365 domain-containing protein [Ralstonia solanacearum].                                | GCF_003515285.1 |
| WP_118897359.1 | X+PIN*→                                                   | X+PIN                   | 1033 | -        | Epsilonproteobacteria | Malaciobacter marinus                  | hypothetical protein [Malaciobacter marinus].                                              | GCF_003544855.1 |
| WP_118994196.1 | HetE-N1→ HetE-N1+TPR+GreAB-C+PIN*→                        | HetE-N1+TPR+GreAB-C+PIN | 1104 | -        | Betaproteobacteria    | Pusillimonas                           | MULTISPECIES: hypothetical protein [Pusillimonas].                                         | GCF_004022565.1 |
| WP_119088708.1 | REase+TPR+GreAB-C+PIN*→                                   | REase+TPR+GreAB-C+PIN   | 1271 | -        | Bacteria              | Candidatus Cryosericum terrychapinii   | hypothetical protein [Candidatus Cryosericum terrychapinii].                               | GCF_003570925.1 |
| WP_119196537.1 | X+PIN*→ HTH→?→?→ HTH→                                     | X+PIN                   | 1109 | -        | Firmicutes            | Dorea formicigenerans                  | hypothetical protein [Dorea formicigenerans].                                              | GCF_003465045.1 |
| WP_119369914.1 | REase+TPR+GreAB-C+PIN*→   <-?<-TPR                        | REase+TPR+GreAB-C+PIN   | 1436 | -        | Gammaproteobacteria   | Pseudomonas monteilii                  | GreA/GreB family elongation factor [Pseudomonas monteilii].                                | GCF_003576045.1 |
| WP_119587627.1 | REase+TPR+GreAB-C+PIN*→                                   | REase+TPR+GreAB-C+PIN   | 1290 | -        | Alphaproteobacteria   | Aurantiacibacter zhengii               | hypothetical protein [Aurantiacibacter zhengii].                                           | GCF_003584125.1 |
| WP_119956833.1 | REase+TPR+GreAB-C+PIN*→                                   | REase+TPR+GreAB-C+PIN   | 1511 | -        | Gammaproteobacteria   | Pseudomonas sp. K1S02-6                | tetratricopeptide repeat protein [Pseudomonas sp. K1S02-6].                                | GCF_003596405.1 |
| WP_119992948.1 | TM+TM+TPR+PIN*→                                           | TM+TM+TPR+PIN           | 1208 | -        | Bacteroidetes         | Bacteroides sp. AM41-16                | hypothetical protein [Bacteroides sp. AM41-16].                                            | GCF_003603495.1 |
| WP_120172805.1 | TM+TM+TPR+PIN*→                                           | TM+TM+TPR+PIN           | 1208 | -        | Bacteroidetes         | Bacteroides sp. AF20-13LB              | hypothetical protein [Bacteroides sp. AF20-13LB].                                          | GCF_003603065.1 |
| WP_120777109.1 | TPR+GreAB-C+PIN*→                                         | TPR+GreAB-C+PIN         | 1192 | -        | Actinobacteria        | Microbacterium sp. CGR2                | hypothetical protein [Microbacterium sp. CGR2].                                            | GCF_003626735.1 |
| WP_121482750.1 | REase+TPR+GreAB-C+PIN*→                                   | REase+TPR+GreAB-C+PIN   | 1233 | -        | Alphaproteobacteria   | Brevundimonas naejangsanensis          | hypothetical protein [Brevundimonas naejangsanensis].                                      | GCF_003627995.1 |
| WP_122071999.1 | PAIRED C-HTH→?→?→?→ GreAB-C+PIN*→                         | GreAB-C+PIN             | 683  | -        | Gammaproteobacteria   | Acinetobacter wuhouensis               | hypothetical protein [Acinetobacter wuhouensis].                                           | GCF_002165345.2 |
| WP_122252741.1 | TPR+GreAB-C+PIN*→                                         | TPR+GreAB-C+PIN         | 1158 | -        | Gammaproteobacteria   | Pseudomonas savastanoi                 | hypothetical protein [Pseudomonas savastanoi].                                             | GCF_003703035.1 |
| WP_122265719.1 | TPR+GreAB-C+PIN*→                                         | TPR+GreAB-C+PIN         | 1140 | -        | Gammaproteobacteria   | Pseudomonas syringae                   | hypothetical protein [Pseudomonas syringae].                                               | GCF_003700575.1 |
| WP_122311960.1 | TPR+GreAB-C+PIN*→                                         | TPR+GreAB-C+PIN         | 1143 | -        | Gammaproteobacteria   | Pseudomonas coronafaciens              | hypothetical protein [Pseudomonas coronafaciens].                                          | GCF_003699785.1 |
| WP_122314252.1 | REase+TPR+GreAB-C+PIN*→                                   | REase+TPR+GreAB-C+PIN   | 1436 | -        | Gammaproteobacteria   | Pseudomonas cichorii                   | hypothetical protein [Pseudomonas cichorii].                                               | GCF_003700275.1 |
| WP_122364448.1 | REase+TPR+GreAB-C+PIN*→                                   | REase+TPR+GreAB-C+PIN   | 1438 | -        | Gammaproteobacteria   | Pseudomonas                            | MULTISPECIES: hypothetical protein [Pseudomonas].                                          | GCF_014842015.1 |
| WP_122365799.1 | TPR+GreAB-C+PIN*→                                         | TPR+GreAB-C+PIN         | 1140 | -        | Gammaproteobacteria   | Pseudomonas syringae group genomosp. 3 | hypothetical protein [Pseudomonas syringae group genomosp. 3].                             | GCF_003702755.1 |
| WP_122471279.1 | HetE-N1→ TPR+GreAB-C+PIN*→                                | TPR+GreAB-C+PIN         | 1100 | -        | Gammaproteobacteria   | Pseudomonas viridiflava                | hypothetical protein [Pseudomonas viridiflava].                                            | GCF_900582365.1 |
| WP_122509345.1 | TPR+GreAB-C+PIN*→                                         | TPR+GreAB-C+PIN         | 1140 | -        | Gammaproteobacteria   | Pseudomonas viridiflava                | hypothetical protein [Pseudomonas viridiflava].                                            | GCF_900581635.1 |
| WP_122559800.1 | REase+TPR+GreAB-C+PIN*→                                   | REase+TPR+GreAB-C+PIN   | 1438 | -        | Gammaproteobacteria   | Pseudomonas viridiflava                | hypothetical protein [Pseudomonas viridiflava].                                            | GCF_900580935.1 |
| WP_122732542.1 | HetE-N1→ HetE-N1+TPR+GreAB-C+PIN*→                        | HetE-N1+TPR+GreAB-C+PIN | 1106 | -        | Gammaproteobacteria   | Pseudomonas viridiflava                | hypothetical protein [Pseudomonas viridiflava].                                            | GCF_900591195.1 |
| WP_122848883.1 | REase+TPR+GreAB-C+PIN*→                                   | REase+TPR+GreAB-C+PIN   | 1321 | -        | Gammaproteobacteria   | Pseudomonas viridiflava                | DUF4365 domain-containing protein [Pseudomonas viridiflava].                               | GCF_900585905.1 |
| WP_122887609.1 | REase+TPR+GreAB-C+PIN*→                                   | REase+TPR+GreAB-C+PIN   | 1345 | -        | Betaproteobacteria    | Burkholderia pseudomallei              | hypothetical protein [Burkholderia pseudomallei].                                          | GCF_900593895.1 |
| WP_123094036.1 | HetE-N1→ TPR+GreAB-C+PIN*→?→ MACRODOMAIN→                 | TPR+GreAB-C+PIN         | 1099 | -        | Gammaproteobacteria   | Marinomonas hwangdonensis              | hypothetical protein [Marinomonas hwangdonensis].                                          | GCF_003721245.1 |
| WP_123338621.1 | REase+TPR+GreAB-C+PIN*→                                   | REase+TPR+GreAB-C+PIN   | 1210 | -        | Actinobacteria        | Curtobacterium sp. PhB171              | DUF4365 domain-containing protein [Curtobacterium sp. PhB171].                             | GCF_003752665.1 |
| WP_123718714.1 | HetE-N1→ TPR+GreAB-C+PIN*→                                | TPR+GreAB-C+PIN         | 1112 | -        | Gammaproteobacteria   | Pseudomonas poae                       | hypothetical protein [Pseudomonas poae].                                                   | GCF_003731985.1 |
| WP_123788903.1 | REase+TPR+GreAB-C+PIN*→                                   | REase+TPR+GreAB-C+PIN   | 1351 | -        | Betaproteobacteria    | Burkholderia multivorans               | hypothetical protein [Burkholderia multivorans].                                           | GCF_003812365.1 |
| WP_123901658.1 | TPR+GreAB-C+PIN→ GreAB-C+PIN*→                            | GreAB-C+PIN             | 535  | -        | Bacteroidetes         | Chryseobacterium bernardetii           | hypothetical protein [Chryseobacterium bernardetii].                                       | GCF_003815955.1 |
| WP_124017047.1 | TPR+GreAB-C+PIN*→                                         | TPR+GreAB-C+PIN         | 838  | -        | Gammaproteobacteria   | Shewanella vesiculosa                  | hypothetical protein [Shewanella vesiculosa].                                              | GCF_003797885.1 |
| WP_124131211.1 | DOC+HTH→ REase+TOPC→?→ HetE-N1→ HetE-N1+TPR+GreAB-C+PIN*→ | HetE-N1+TPR+GreAB-C+PIN | 1124 | -        | Gammaproteobacteria   | Pseudomonas aeruginosa                 | hypothetical protein [Pseudomonas aeruginosa].                                             | GCF_003836815.1 |
| WP_124132190.1 | TPR+GreAB-C+PIN*→                                         | TPR+GreAB-C+PIN         | 1140 | -        | Gammaproteobacteria   | Pseudomonas aeruginosa                 | hypothetical protein [Pseudomonas aeruginosa].                                             | GCF_003836445.1 |

| acc            | operon                                                    | architecture                 | len  | gen.name | taxend              | species                                         | define                                                                         | gca             |
|----------------|-----------------------------------------------------------|------------------------------|------|----------|---------------------|-------------------------------------------------|--------------------------------------------------------------------------------|-----------------|
| WP_124135313.1 | TPR+GreAB-C+PIN*→                                         | TPR+GreAB-C+PIN              | 1158 | -        | Gammaproteobacteria | <i>Pseudomonas aeruginosa</i>                   | hypothetical protein [Pseudomonas aeruginosa].                                 | GCF_003836905.1 |
| WP_124172921.1 | DOC+HTH→ REase+TOPC→?→ HetE-N1→ HetE-N1+TPR+GreAB-C+PIN*→ | HetE-N1+TPR+GreAB-C+PIN      | 1124 | -        | Gammaproteobacteria | <i>Pseudomonas aeruginosa</i>                   | hypothetical protein [Pseudomonas aeruginosa].                                 | GCF_003839465.1 |
| WP_124325287.1 | TPR+GreAB-C+PIN*→                                         | TPR+GreAB-C+PIN              | 1139 | -        | Gammaproteobacteria | <i>Pseudomonas chlororaphis</i>                 | hypothetical protein [Pseudomonas chlororaphis].                               | GCF_003850385.1 |
| WP_124410055.1 | HetE-N1→ TPR+GreAB-C+PIN*→                                | TPR+GreAB-C+PIN              | 1110 | -        | Gammaproteobacteria | <i>Pseudomonas</i> sp. R4-34-07                 | hypothetical protein [Pseudomonas sp. R4-34-07].                               | GCF_003852375.1 |
| WP_124421918.1 | TPR+GreAB-C+PIN*→                                         | TPR+GreAB-C+PIN              | 1157 | -        | Gammaproteobacteria | <i>Pseudomonas orientalis</i>                   | hypothetical protein [Pseudomonas orientalis].                                 | GCF_003851585.1 |
| WP_124432744.1 | REase+TPR+GreAB-C+PIN*→                                   | REase+TPR+GreAB-C+PIN        | 1321 | -        | Gammaproteobacteria | <i>Pseudomonas orientalis</i>                   | DUF4365 domain-containing protein [Pseudomonas orientalis].                    | GCF_003852045.1 |
| WP_124433851.1 | REase+TPR+GreAB-C+PIN*→                                   | REase+TPR+GreAB-C+PIN        | 1321 | -        | Gammaproteobacteria | <i>Pseudomonas orientalis</i>                   | DUF4365 domain-containing protein [Pseudomonas orientalis].                    | GCF_003852045.1 |
| WP_124551445.1 | HEPN→?→?→ REase+TPR+GreAB-C+PIN*→                         | REase+TPR+GreAB-C+PIN        | 1498 | -        | Betaproteobacteria  | <i>Burkholderia</i> sp. Bp9015                  | tetratricopeptide repeat protein [Burkholderia sp. Bp9015].                    | GCF_003853505.1 |
| WP_124582885.1 | TPR+GreAB-C+PIN*→                                         | TPR+GreAB-C+PIN              | 1248 | -        | Bacteroidetes       | <i>Pedobacter</i> sp. KBW06                     | hypothetical protein [Pedobacter sp. KBW06].                                   | GCF_003852525.1 |
| WP_124686982.1 | REase+TPR+GreAB-C+PIN*→                                   | REase+TPR+GreAB-C+PIN        | 1344 | -        | Betaproteobacteria  | <i>Cupriavidus pauculus</i>                     | tetratricopeptide repeat protein [Cupriavidus pauculus].                       | GCF_003854935.1 |
| WP_124885098.1 | REase+TPR+GreAB-C+PIN*→                                   | REase+TPR+GreAB-C+PIN        | 1351 | -        | Betaproteobacteria  | <i>Burkholderia stagnalis</i>                   | hypothetical protein [Burkholderia stagnalis].                                 | GCF_003857545.1 |
| WP_124919377.1 | REase+TPR+GreAB-C+PIN*→                                   | REase+TPR+GreAB-C+PIN        | 1500 | -        | Betaproteobacteria  | <i>Burkholderia</i>                             | MULTISPECIES: tetratricopeptide repeat protein [Burkholderia].                 | GCF_001528845.1 |
| WP_124920354.1 | HEPN→?→?→ REase+TPR+GreAB-C+PIN*→                         | REase+TPR+GreAB-C+PIN        | 1289 | -        | Betaproteobacteria  | <i>Burkholderia stagnalis</i>                   | tetratricopeptide repeat protein [Burkholderia stagnalis].                     | GCF_003857615.1 |
| WP_125127612.1 | X+PIN*→?→?→?→ MACRODOMAIN→                                | X+PIN                        | 1232 | -        | Firmicutes          | <i>Schaedlerella arabinosiphila</i>             | hypothetical protein [Schaedlerella arabinosiphila].                           | GCF_003885045.1 |
| WP_125255381.1 | REase+TPR+GreAB-C+PIN*→                                   | REase+TPR+GreAB-C+PIN        | 1327 | -        | Alphaproteobacteria | <i>Brevundimonas fluminis</i>                   | DUF4365 domain-containing protein [Brevundimonas fluminis].                    | GCF_003934285.1 |
| WP_125429200.1 | REase+TPR+GreAB-C+PIN*→                                   | REase+TPR+GreAB-C+PIN        | 1284 | -        | Gammaproteobacteria | <i>Stenotrophomonas maltophilia</i>             | GreA/GreB family elongation factor [Stenotrophomonas maltophilia].             | GCF_003935615.1 |
| WP_125440526.1 | <-REase+nSTAND3  TPR+GreAB-C+PIN*→                        | TPR+GreAB-C+PIN              | 1282 | -        | Bacteroidetes       | <i>Hymenobacter perfusus</i>                    | hypothetical protein [Hymenobacter perfusus].                                  | GCF_003944765.1 |
| WP_125601225.1 | HetE-N1→ MNS-Npun2340+TPR+GreAB-C+PIN*→                   | MNS-Npun2340+TPR+GreAB-C+PIN | 1094 | -        | Gammaproteobacteria | <i>Aeromonas salmonicida</i>                    | hypothetical protein [Aeromonas salmonicida].                                  | GCF_003947375.1 |
| WP_125730033.1 | HetE-N1→ TPR+GreAB-C+PIN*→                                | TPR+GreAB-C+PIN              | 1094 | -        | Gammaproteobacteria | <i>Aeromonas salmonicida</i>                    | hypothetical protein [Aeromonas salmonicida].                                  | GCF_003947355.1 |
| WP_126243019.1 | REase+TPR+GreAB-C+PIN*→                                   | REase+TPR+GreAB-C+PIN        | 1333 | -        | Betaproteobacteria  | <i>Burkholderia gladioli</i>                    | hypothetical protein [Burkholderia gladioli].                                  | GCF_902829535.1 |
| WP_126550729.1 | TPR+GreAB-C+PIN*→                                         | TPR+GreAB-C+PIN              | 1140 | -        | Gammaproteobacteria | <i>Pseudomonas aeruginosa</i>                   | hypothetical protein [Pseudomonas aeruginosa].                                 | GCF_001516225.2 |
| WP_126566690.1 | TPR+GreAB-C+PIN*→                                         | TPR+GreAB-C+PIN              | 1043 | -        | Gammaproteobacteria | <i>Pseudomonas aeruginosa</i>                   | hypothetical protein [Pseudomonas aeruginosa].                                 | GCF_003968275.1 |
| WP_126570139.1 | DOC+HTH→ REase+TOPC→?→ HetE-N1→ HetE-N1→ GreAB-C+PIN*→    | GreAB-C+PIN                  | 523  | -        | Gammaproteobacteria | <i>Pseudomonas aeruginosa</i>                   | hypothetical protein [Pseudomonas aeruginosa].                                 | GCF_003969065.1 |
| WP_127030837.1 | HetE-N1→ TPR+GreAB-C+PIN*→                                | TPR+GreAB-C+PIN              | 1093 | -        | Gammaproteobacteria | <i>Pectobacterium versatile</i>                 | hypothetical protein [Pectobacterium versatile].                               | GCF_003990505.1 |
| WP_127257681.1 | REase+TPR+GreAB-C+PIN*→                                   | REase+TPR+GreAB-C+PIN        | 1287 | -        | Alphaproteobacteria | <i>Mesorhizobium</i> sp. M7A.F.Ca.US.008.03.1.1 | hypothetical protein [Mesorhizobium sp. M7A.F.Ca.US.008.03.1.1].               | GCF_003997495.1 |
| WP_127294273.1 | REase+TPR+TPR+GreAB-C+PIN*→                               | REase+TPR+TPR+GreAB-C+PIN    | 1333 | -        | Alphaproteobacteria | <i>Mesorhizobium</i> sp. M6A.T.Ce.TU.016.01.1.1 | GreA/GreB family elongation factor [Mesorhizobium sp. M6A.T.Ce.TU.016.01.1.1]. | GCF_003997065.1 |
| WP_127581798.1 | BirA-HTH→?→ REase+TPR+TPR+GreAB-C+PIN*→                   | REase+TPR+TPR+GreAB-C+PIN    | 1322 | -        | Alphaproteobacteria | <i>Sinorhizobium medicae</i>                    | hypothetical protein [Sinorhizobium medicae].                                  | GCF_004002295.1 |
| WP_128106456.1 | REase+TPR+GreAB-C+PIN*→                                   | REase+TPR+GreAB-C+PIN        | 1323 | -        | Alphaproteobacteria | <i>Acetobacter oryzoeni</i>                     | tetratricopeptide repeat protein [Acetobacter oryzoeni].                       | GCF_004014775.2 |
| WP_128141476.1 | REase+TPR+GreAB-C+PIN*→                                   | REase+TPR+GreAB-C+PIN        | 1616 | -        | Betaproteobacteria  | <i>Janthinobacterium lividum</i>                | hypothetical protein [Janthinobacterium lividum].                              | GCF_900451225.1 |
| WP_128142627.1 | REase+TPR+GreAB-C+PIN*→                                   | REase+TPR+GreAB-C+PIN        | 1269 | -        | Betaproteobacteria  | <i>Janthinobacterium lividum</i>                | hypothetical protein [Janthinobacterium lividum].                              | GCF_900451225.1 |
| WP_128181279.1 | REase+TPR+TPR+GreAB-C+PIN*→                               | REase+TPR+TPR+GreAB-C+PIN    | 1330 | -        | Alphaproteobacteria | <i>Sinirhodobacter populi</i>                   | hypothetical protein [Sinirhodobacter populi].                                 | GCF_004022225.1 |
| WP_128291227.1 | REase+TPR+GreAB-C+PIN*→                                   | REase+TPR+GreAB-C+PIN        | 1320 | -        | Alphaproteobacteria | <i>Afifella aestuarii</i>                       | hypothetical protein [Afifella aestuarii].                                     | GCF_004023665.1 |
| WP_128326676.1 | REase+TPR+GreAB-C+PIN*→                                   | REase+TPR+GreAB-C+PIN        | 1493 | -        | Gammaproteobacteria | <i>Pseudomonas alkylphenolica</i>               | hypothetical protein [Pseudomonas alkylphenolica].                             | GCF_004025535.1 |
| WP_128384334.1 | X+PIN*→                                                   | X+PIN                        | 1055 | -        | Gammaproteobacteria | <i>Hydrogenovibrio thermophilus</i>             | hypothetical protein [Hydrogenovibrio thermophilus].                           | GCF_004028275.1 |
| WP_128449906.1 | REase+TPR+TPR+GreAB-C+PIN*→                               | REase+TPR+TPR+GreAB-C+PIN    | 1385 | -        | Alphaproteobacteria | <i>Rhizobium leguminosarum</i>                  | hypothetical protein [Rhizobium leguminosarum].                                | GCF_004054135.1 |
| WP_128549293.1 | TPR+GreAB-C+PIN*→                                         | TPR+GreAB-C+PIN              | 1187 | -        | Alphaproteobacteria | <i>Salipiger</i>                                | MULTISPECIES: tetratricopeptide repeat protein [Salipiger].                    | GCF_014637265.1 |
| WP_128552168.1 | DOC+HTH→ REase+TOPC→ HetE-N1→ HetE-N1+TPR+GreAB-C+PIN*→   | HetE-N1+TPR+GreAB-C+PIN      | 1123 | -        | Gammaproteobacteria | <i>Pseudomonas aeruginosa</i>                   | hypothetical protein [Pseudomonas aeruginosa].                                 | GCF_003698765.1 |

| acc            | operon                                                    | architecture              | len  | gen.name | taxend                | species                                        | define                                                                        | gca             |
|----------------|-----------------------------------------------------------|---------------------------|------|----------|-----------------------|------------------------------------------------|-------------------------------------------------------------------------------|-----------------|
| WP_128664039.1 | DOC+HTH→ REase+TOPC→?→ HetE-N1→ HetE-N1+TPR+GreAB-C+PIN*→ | HetE-N1+TPR+GreAB-C+PIN   | 1124 | -        | Gammaproteobacteria   | <i>Pseudomonas</i>                             | MULTISPECIES: hypothetical protein [Pseudomonas].                             | GCF_016624455.1 |
| WP_128715623.1 | SIG+HIN-HTH→?→ GreAB-C+PIN*→                              | GreAB-C+PIN               | 540  | -        | Alphaproteobacteria   | <i>Rhizobium acidisoli</i>                     | hypothetical protein [Rhizobium acidisoli].                                   | GCF_002531755.2 |
| WP_128816805.1 | REase→ TPR+PIN*→                                          | TPR+PIN                   | 875  | -        | Actinobacteria        | <i>Streptomyces</i> sp. S063                   | tetratricopeptide repeat protein [Streptomyces sp. S063].                     | GCF_002832675.1 |
| WP_128912272.1 | REase+TPR+GreAB-C+PIN*→                                   | REase+TPR+GreAB-C+PIN     | 1277 | -        | Acidobacteria         | <i>Granulicella sibirica</i>                   | hypothetical protein [Granulicella sibirica].                                 | GCF_004115155.1 |
| WP_129013963.1 | TPR+GreAB-C+PIN*→?→?→?→?→?→ TIR+TPR+TPR→                  | TPR+GreAB-C+PIN           | 1046 | -        | Epsilonproteobacteria | <i>Arcobacter cloacae</i>                      | hypothetical protein [Arcobacter cloacae].                                    | GCF_013201935.1 |
| WP_129107976.1 | REase+TPR+GreAB-C+PIN*→                                   | REase+TPR+GreAB-C+PIN     | 1200 | -        | Epsilonproteobacteria | <i>Halarcobacter bivalviorum</i>               | hypothetical protein [Halarcobacter bivalviorum].                             | GCF_004116705.1 |
| WP_129330071.1 | HetE-N1→?→ TPR+GreAB-C+PIN*→                              | TPR+GreAB-C+PIN           | 739  | -        | Gammaproteobacteria   | <i>Salmonella enterica</i>                     | hypothetical protein [Salmonella enterica].                                   | GCF_004120835.1 |
| WP_129368690.1 | HetE-N1→?→ TPR+GreAB-C+PIN*→                              | TPR+GreAB-C+PIN           | 855  | -        | Gammaproteobacteria   | <i>Salmonella enterica</i>                     | hypothetical protein [Salmonella enterica].                                   | GCF_004120585.1 |
| WP_129411798.1 | REase+TPR+GreAB-C+PIN*→                                   | REase+TPR+GreAB-C+PIN     | 1323 | -        | Alphaproteobacteria   | <i>Mesorhizobium</i> sp. Pch-S                 | hypothetical protein [Mesorhizobium sp. Pch-S].                               | GCF_004136315.1 |
| WP_129485462.1 | REase+TPR+GreAB-C+PIN*→                                   | REase+TPR+GreAB-C+PIN     | 1468 | -        | Gammaproteobacteria   | <i>Pseudomonas syringae</i>                    | hypothetical protein [Pseudomonas syringae].                                  | GCF_004124725.1 |
| WP_129893847.1 | REase+TPR+GreAB-C+PIN*→                                   | REase+TPR+GreAB-C+PIN     | 1309 | -        | Chloroflexi           | <i>Ktedonosporobacter rubrisoli</i>            | tetratricopeptide repeat protein [Ktedonosporobacter rubrisoli].              | GCF_004208415.1 |
| WP_130007120.1 | HetE-N1→ HetE-N1+TPR+GreAB-C+PIN*→                        | HetE-N1+TPR+GreAB-C+PIN   | 1104 | -        | Betaproteobacteria    | <i>Pusillimonas ginsengisoli</i>               | hypothetical protein [Pusillimonas ginsengisoli].                             | GCF_004153455.1 |
| WP_130044922.1 | HetE-N1→ TPR+GreAB-C+PIN*→                                | TPR+GreAB-C+PIN           | 1116 | -        | Gammaproteobacteria   | <i>Aliivibrio finisterrensis</i>               | hypothetical protein [Aliivibrio finisterrensis].                             | GCF_004167675.1 |
| WP_130132480.1 | REase+TPR+GreAB-C+PIN*→                                   | REase+TPR+GreAB-C+PIN     | 1245 | -        | Gammaproteobacteria   | <i>Acinetobacter wuhouensis</i>                | hypothetical protein [Acinetobacter wuhouensis].                              | GCF_004209325.1 |
| WP_130204115.1 | HetE-N1→ TPR+GreAB-C+PIN*→                                | TPR+GreAB-C+PIN           | 1113 | -        | Gammaproteobacteria   | <i>Pseudomonas moorei</i>                      | hypothetical protein [Pseudomonas moorei].                                    | GCF_004212425.1 |
| WP_130252287.1 | HetE-N1→ TPR+GreAB-C+PIN*→                                | TPR+GreAB-C+PIN           | 1114 | -        | Gammaproteobacteria   | <i>Vibrio vulnificus</i>                       | hypothetical protein [Vibrio vulnificus].                                     | GCF_004214575.1 |
| WP_130472343.1 | REase+TPR+GreAB-C+PIN*→                                   | REase+TPR+GreAB-C+PIN     | 1348 | -        | Alphaproteobacteria   | <i>Candidatus Magnetaquicoccus inordinatus</i> | hypothetical protein [Candidatus Magnetaquicoccus inordinatus].               | GCF_004217665.1 |
| WP_130525307.1 | HetE-N1→ TPR+GreAB-C+PIN*→                                | TPR+GreAB-C+PIN           | 1086 | -        | Gammaproteobacteria   | <i>Pasteurella multocida</i>                   | hypothetical protein [Pasteurella multocida].                                 | GCF_003428945.1 |
| WP_130555679.1 | HetE-N1→ TPR+GreAB-C+PIN*→                                | TPR+GreAB-C+PIN           | 1086 | -        | Gammaproteobacteria   | <i>Pasteurella multocida</i>                   | hypothetical protein [Pasteurella multocida].                                 | GCF_001578435.2 |
| WP_130710767.1 | REase+TPR+TPR+GreAB-C+PIN*→                               | REase+TPR+TPR+GreAB-C+PIN | 1343 | -        | Alphaproteobacteria   | <i>Rhizobium leguminosarum</i>                 | hypothetical protein [Rhizobium leguminosarum].                               | GCF_004304355.1 |
| WP_130725527.1 | REase+TPR+GreAB-C+PIN*→                                   | REase+TPR+GreAB-C+PIN     | 1255 | -        | Alphaproteobacteria   | <i>Rhizobium leguminosarum</i>                 | hypothetical protein [Rhizobium leguminosarum].                               | GCF_004303985.1 |
| WP_130928792.1 | REase+TPR+GreAB-C+PIN*→                                   | REase+TPR+GreAB-C+PIN     | 1438 | -        | Gammaproteobacteria   | <i>Pseudomonas</i> sp. Sample_20               | hypothetical protein [Pseudomonas sp. Sample_20].                             | GCF_004307585.1 |
| WP_131049955.1 | HetE-N1→ TPR+GreAB-C+PIN*→                                | TPR+GreAB-C+PIN           | 1092 | -        | Gammaproteobacteria   | <i>Raoultella ornithinolytica</i>              | hypothetical protein [Raoultella ornithinolytica].                            | GCF_004312065.1 |
| WP_131189445.1 | HetE-N1→ HetE-N1+TPR+GreAB-C+PIN*→                        | HetE-N1+TPR+GreAB-C+PIN   | 1125 | -        | Gammaproteobacteria   | <i>Pseudomonas kirkiae</i>                     | hypothetical protein [Pseudomonas kirkiae].                                   | GCF_004327175.1 |
| WP_131590605.1 | TPR+PIN*→                                                 | TPR+PIN                   | 1153 | -        | Actinobacteria        | <i>Mycolicibacterium setense</i>               | hypothetical protein [Mycolicibacterium setense].                             | GCF_000805375.1 |
| WP_131623255.1 | REase+TPR+TPR+GreAB-C+PIN*→                               | REase+TPR+TPR+GreAB-C+PIN | 1361 | -        | Alphaproteobacteria   | <i>Rhizobium leguminosarum</i>                 | hypothetical protein [Rhizobium leguminosarum].                               | GCF_004330075.1 |
| WP_131714066.1 | REase+TPR+TPR+GreAB-C+PIN*→                               | REase+TPR+TPR+GreAB-C+PIN | 1337 | -        | Alphaproteobacteria   | <i>Rhizobium leguminosarum</i>                 | hypothetical protein [Rhizobium leguminosarum].                               | GCF_004330185.1 |
| WP_131718233.1 | TPR+GreAB-C+PIN*→                                         | TPR+GreAB-C+PIN           | 556  | -        | Alphaproteobacteria   | <i>Rhizobium leguminosarum</i>                 | hypothetical protein [Rhizobium leguminosarum].                               | GCF_004330625.1 |
| WP_131814603.1 | TPR+GreAB-C+PIN*→                                         | TPR+GreAB-C+PIN           | 595  | -        | Alphaproteobacteria   | <i>Cognatishimia maritima</i>                  | hypothetical protein [Cognatishimia maritima].                                | GCF_900129685.1 |
| WP_131869160.1 | TPR+GreAB-C+PIN*→                                         | TPR+GreAB-C+PIN           | 1306 | -        | Alphaproteobacteria   | unclassified Bradyrhizobium                    | MULTISPECIES: tetratricopeptide repeat protein [unclassified Bradyrhizobium]. | GCF_004346395.1 |
| WP_132139369.1 | REase+TPR+GreAB-C+PIN*→                                   | REase+TPR+GreAB-C+PIN     | 1368 | -        | Betaproteobacteria    | <i>Massilia</i> sp. GV090                      | hypothetical protein [Massilia sp. GV090].                                    | GCF_004341465.1 |
| WP_132251347.1 | TPR+GreAB-C+PIN*→                                         | TPR+GreAB-C+PIN           | 1114 | -        | Alphaproteobacteria   | <i>Methylobacterium segetis</i>                | tetratricopeptide repeat protein [Methylobacterium segetis].                  | GCF_004348265.1 |
| WP_132403375.1 | TPR+GreAB-C+PIN*→                                         | TPR+GreAB-C+PIN           | 1266 | -        | Bacteroidetes         | <i>Pedobacter</i> sp. CF074                    | hypothetical protein [Pedobacter sp. CF074].                                  | GCF_004342125.1 |
| WP_132537157.1 | BirA-HTH→ HEPN→ REase+TPR+TPR+GreAB-C+PIN*→               | REase+TPR+TPR+GreAB-C+PIN | 1332 | -        | Alphaproteobacteria   | <i>Rhizobium</i> sp. PP-F2F-G48                | GreA/GreB family elongation factor [Rhizobium sp. PP-F2F-G48].                | GCF_004342335.1 |
| WP_132665856.1 | REase+TPR+GreAB-C+PIN*→                                   | REase+TPR+GreAB-C+PIN     | 1297 | -        | Alphaproteobacteria   | <i>Rhizobium</i> sp. PP-CC-3G-465              | tetratricopeptide repeat protein [Rhizobium sp. PP-CC-3G-465].                | GCF_004343445.1 |
| WP_132831667.1 | TPR+GreAB-C+PIN*→                                         | TPR+GreAB-C+PIN           | 1188 | -        | Alphaproteobacteria   | <i>Antarcticimicrobium sediminis</i>           | hypothetical protein [Antarcticimicrobium sediminis].                         | GCF_004348975.1 |
| WP_132850706.1 | TPR+PIN*→                                                 | TPR+PIN                   | 1135 | -        | Actinobacteria        | <i>Streptomyces</i> sp. BK308                  | tetratricopeptide repeat protein [Streptomyces sp. BK308].                    | GCF_004346005.1 |
| WP_133023868.1 | TPR+PIN*→                                                 | TPR+PIN                   | 1216 | -        | Actinobacteria        | <i>Streptomyces</i> sp. BK329                  | hypothetical protein [Streptomyces sp. BK329].                                | GCF_004341055.1 |
| WP_133030467.1 | REase+TPR+GreAB-C+PIN*→                                   | REase+TPR+GreAB-C+PIN     | 1317 | -        | Alphaproteobacteria   | <i>Sphingomonas</i> sp. PP-CE-1G-424           | tetratricopeptide repeat protein [Sphingomonas sp. PP-CE-1G-424].             | GCF_004341085.1 |

| acc            | operon                       | architecture              | len  | gen.name | taxend              | species                              | define                                                         | gca             |
|----------------|------------------------------|---------------------------|------|----------|---------------------|--------------------------------------|----------------------------------------------------------------|-----------------|
| WP_133031998.1 | REase+TPR+GreAB-C+PIN*→      | REase+TPR+GreAB-C+PIN     | 1323 | -        | Alphaproteobacteria | Sphingomonas sp. PP-CE-1G-424        | hypothetical protein [Sphingomonas sp. PP-CE-1G-424].          | GCF_004341085.1 |
| WP_133117283.1 | REase+TPR+TPR+GreAB-C+PIN*→  | REase+TPR+TPR+GreAB-C+PIN | 1332 | -        | Alphaproteobacteria | Mesorhizobium sanjuanii              | hypothetical protein [Mesorhizobium sanjuanii].                | GCF_002529485.1 |
| WP_133245819.1 | REase+TPR+GreAB-C+PIN*→      | REase+TPR+GreAB-C+PIN     | 1322 | -        | Alphaproteobacteria | Candidatus Phycosocius bacilliformis | hypothetical protein [Candidatus Phycosocius bacilliformis].   | GCF_003112735.1 |
| WP_133303262.1 | TPR+GreAB-C+PIN*→            | TPR+GreAB-C+PIN           | 1082 | -        | Alphaproteobacteria | Rhodopseudomonas palustris           | hypothetical protein [Rhodopseudomonas palustris].             | GCF_013415845.1 |
| WP_133404970.1 | REase+TPR+GreAB-C+PIN*→      | REase+TPR+GreAB-C+PIN     | 1260 | -        | Actinobacteria      | Arthrobacter crusticola              | DUF4365 domain-containing protein [Arthrobacter crusticola].   | GCF_004357995.1 |
| WP_133633736.1 | REase+TPR+GreAB-C+PIN*→      | REase+TPR+GreAB-C+PIN     | 1321 | -        | Gammaproteobacteria | Pseudomonas sp. OV184                | DUF4365 domain-containing protein [Pseudomonas sp. OV184].     | GCF_004363115.1 |
| WP_133936590.1 | REase+TPR+GreAB-C+PIN*→      | REase+TPR+GreAB-C+PIN     | 1489 | -        | Betaproteobacteria  | Comamonas kerstersii                 | tetratricopeptide repeat protein [Comamonas kerstersii].       | GCF_002002425.1 |
| WP_134016909.1 | REase+TPR+GreAB-C+PIN*→      | REase+TPR+GreAB-C+PIN     | 1313 | -        | Alphaproteobacteria | Litoreibacter halocynthiae           | hypothetical protein [Litoreibacter halocynthiae].             | GCF_004365635.1 |
| WP_134268494.1 | PIN*→                        | PIN                       | 186  | -        | Firmicutes          | Sporosarcina pasteurii               | hypothetical protein [Sporosarcina pasteurii].                 | GCF_004379295.1 |
| WP_134281591.1 | TPR+GreAB-C+PIN*→            | TPR+GreAB-C+PIN           | 1159 | -        | Gammaproteobacteria | Pseudomonas                          | MULTISPECIES: hypothetical protein [Pseudomonas].              | GCF_013522725.1 |
| WP_135194680.1 | REase+TPR+GreAB-C+PIN*→      | REase+TPR+GreAB-C+PIN     | 1327 | -        | Alphaproteobacteria | Brevundimonas intermedia             | DUF4365 domain-containing protein [Brevundimonas intermedia].  | GCF_004614235.1 |
| WP_135269295.1 | TPR+PIN*→                    | TPR+PIN                   | 1211 | -        | Actinobacteria      | Nocardioides seonyuensis             | hypothetical protein [Nocardioides seonyuensis].               | GCF_004683965.1 |
| WP_135300409.1 | HetE-N1→ TPR+GreAB-C+PIN*→   | TPR+GreAB-C+PIN           | 1130 | -        | Gammaproteobacteria | Photobacterium damsela               | hypothetical protein [Photobacterium damsela].                 | GCF_004683985.2 |
| WP_135312567.1 | REase+TPR+GreAB-C+PIN→ PIN*→ | PIN                       | 479  | -        | Alphaproteobacteria | Paracoccus liaowanqingii             | hypothetical protein [Paracoccus liaowanqingii].               | GCF_004683865.2 |
| WP_135953001.1 | HetE-N1→ TPR+GreAB-C+PIN*→   | TPR+GreAB-C+PIN           | 987  | -        | Gammaproteobacteria | Pasteurella multocida                | hypothetical protein [Pasteurella multocida].                  | GCF_004792575.1 |
| WP_135961458.1 | HetE-N1→ TPR+GreAB-C+PIN*→   | TPR+GreAB-C+PIN           | 1086 | -        | Gammaproteobacteria | Pasteurella multocida                | hypothetical protein [Pasteurella multocida].                  | GCF_004792555.1 |
| WP_136247578.1 | HetE-N1→ TPR+GreAB-C+PIN*→   | TPR+GreAB-C+PIN           | 1103 | -        | Gammaproteobacteria | Halomonas borealis                   | hypothetical protein [Halomonas borealis].                     | GCF_004798905.1 |
| WP_136878408.1 | TPR+GreAB-C+PIN*→            | TPR+GreAB-C+PIN           | 1248 | -        | Bacteroidetes       | Pedobacter sp. AR-2-6                | hypothetical protein [Pedobacter sp. AR-2-6].                  | GCF_005116475.1 |
| WP_137004448.1 | REase+TPR+GreAB-C+PIN*→      | REase+TPR+GreAB-C+PIN     | 1290 | -        | Alphaproteobacteria | Agrobacterium tumefaciens            | hypothetical protein [Agrobacterium tumefaciens].              | GCF_005221405.1 |
| WP_137059419.1 | TPR+PIN*→                    | TPR+PIN                   | 1157 | -        | Firmicutes          | Bacillus mycoides                    | hypothetical protein [Bacillus mycoides].                      | GCF_005217805.1 |
| WP_137213367.1 | TPR+GreAB-C+PIN*→            | TPR+GreAB-C+PIN           | 1139 | -        | Gammaproteobacteria | Pseudomonas sp. CFBP13508            | hypothetical protein [Pseudomonas sp. CFBP13508].              | GCF_005233515.1 |
| WP_137383131.1 | HetE-N1→ TPR+GreAB-C+PIN*→   | TPR+GreAB-C+PIN           | 1091 | -        | Gammaproteobacteria | Citrobacter sp. wls619               | hypothetical protein [Citrobacter sp. wls619].                 | GCF_005281345.1 |
| WP_137387523.1 | HetE-N1→ TPR+GreAB-C+PIN*→   | TPR+GreAB-C+PIN           | 1101 | -        | Gammaproteobacteria | Pantoea sp. SO10                     | hypothetical protein [Pantoea sp. SO10].                       | GCF_005281435.1 |
| WP_137434419.1 | REase+TPR+GreAB-C+PIN*→      | REase+TPR+GreAB-C+PIN     | 1288 | -        | Gammaproteobacteria | Marinobacter sp. PJ-16               | hypothetical protein [Marinobacter sp. PJ-16].                 | GCF_005298175.1 |
| WP_137735239.1 | REase+TPR+GreAB-C+PIN*→      | REase+TPR+GreAB-C+PIN     | 1437 | -        | Betaproteobacteria  | Aquabacterium pictum                 | hypothetical protein [Aquabacterium pictum].                   | GCF_005403045.1 |
| WP_137905827.1 | TPR+GreAB-C+PIN*→            | TPR+GreAB-C+PIN           | 1130 | -        | Bacteroidetes       | Chryseobacterium sp. 2VB             | hypothetical protein [Chryseobacterium sp. 2VB].               | GCF_005503635.1 |
| WP_138242320.1 | HetE-N1→ TPR+GreAB-C+PIN*→   | TPR+GreAB-C+PIN           | 1130 | -        | Gammaproteobacteria | Photobacterium damsela               | hypothetical protein [Photobacterium damsela].                 | GCF_005819845.1 |
| WP_138262872.1 | X+PIN*→                      | X+PIN                     | 1204 | -        | Firmicutes          | Enterocloster clostridioformis       | hypothetical protein [Enterocloster clostridioformis].         | GCF_015548065.1 |
| WP_138402485.1 | TPR+GreAB-C+PIN*→            | TPR+GreAB-C+PIN           | 1137 | -        | Bacteroidetes       | Chryseobacterium indologenes         | hypothetical protein [Chryseobacterium indologenes].           | GCF_005862425.1 |
| WP_138437829.1 | HetE-N1→ GreAB-C*→           | GreAB-C                   | 802  | -        | Gammaproteobacteria | Marinobacter                         | MULTISPECIES: hypothetical protein [Marinobacter].             | GCF_005871095.1 |
| WP_138616099.1 | HetE-N1→ TPR+GreAB-C+PIN*→   | TPR+GreAB-C+PIN           | 1106 | -        | Gammaproteobacteria | Pseudoalteromonas sp. S2721          | hypothetical protein [Pseudoalteromonas sp. S2721].            | GCF_005887425.1 |
| WP_139051161.1 | TPR+GreAB-C+PIN*→            | TPR+GreAB-C+PIN           | 1158 | -        | Gammaproteobacteria | unclassified Pseudomonas             | MULTISPECIES: hypothetical protein [unclassified Pseudomonas]. | GCF_901007645.1 |
| WP_139100594.1 | TPR+PIN*→                    | TPR+PIN                   | 1197 | -        | Actinobacteria      | Amycolatopsis alkalitolerans         | hypothetical protein [Amycolatopsis alkalitolerans].           | GCF_006152065.1 |
| WP_139135497.1 | X+PIN*→                      | X+PIN                     | 1093 | -        | Actinobacteria      | Micromonospora tulbaghia             | hypothetical protein [Micromonospora tulbaghia].               | GCF_900091605.1 |
| WP_139156465.1 | HetE-N1→?→ TPR+GreAB-C+PIN*→ | TPR+GreAB-C+PIN           | 523  | -        | Gammaproteobacteria | Salmonella enterica                  | hypothetical protein [Salmonella enterica].                    | GCF_003071545.1 |
| WP_139230170.1 | TPR+PIN*→                    | TPR+PIN                   | 1206 | -        | Actinobacteria      | Nocardioides terrae                  | hypothetical protein [Nocardioides terrae].                    | GCF_900112345.1 |
| WP_139231027.1 | TPR+GreAB-C+PIN*→            | TPR+GreAB-C+PIN           | 1155 | -        | Gammaproteobacteria | Pseudomonas sagittaria               | hypothetical protein [Pseudomonas sagittaria].                 | GCF_900115715.1 |

| acc            | operon                                                               | architecture            | len  | gen.name | taxend                | species                                             | define                                                                                  | gca             |
|----------------|----------------------------------------------------------------------|-------------------------|------|----------|-----------------------|-----------------------------------------------------|-----------------------------------------------------------------------------------------|-----------------|
| WP_139231685.1 | REase+TPR+GreAB-C+PIN*→?→?→ Calcineurin→ Calcineurin→?→ Calcineurin→ | REase+TPR+GreAB-C+PIN   | 1314 | -        | Alphaproteobacteria   | Methylobacterium phyllosphaerae                     | hypothetical protein [Methylobacterium phyllosphaerae].                                 | GCF_001936175.1 |
| WP_139585558.1 | TPR+PIN*→                                                            | TPR+PIN                 | 1173 | -        | Actinobacteria        | Micromonospora orduensis                            | hypothetical protein [Micromonospora orduensis].                                        | GCF_006228125.1 |
| WP_139699848.1 | TPR+GreAB-C+PIN*→                                                    | TPR+GreAB-C+PIN         | 1163 | -        | unclassified Bacteria | bacterium endosymbiont of Bathymodiolus sp. 5 South | tetratricopeptide repeat protein [bacterium endosymbiont of Bathymodiolus sp. 5 South]. | GCF_900127295.1 |
| WP_139711990.1 | TPR+PIN*→                                                            | TPR+PIN                 | 816  | -        | Actinobacteria        | Streptomyces sp. NP160                              | hypothetical protein [Streptomyces sp. NP160].                                          | GCF_006335115.1 |
| WP_139741421.1 | HetE-N1→ TPR+GreAB-C+PIN*→                                           | TPR+GreAB-C+PIN         | 1086 | -        | Gammaproteobacteria   | Aeromonas veronii                                   | hypothetical protein [Aeromonas veronii].                                               | GCF_006243415.1 |
| WP_139832542.1 | REase+TPR+GreAB-C+PIN*→                                              | REase+TPR+GreAB-C+PIN   | 1427 | -        | Gammaproteobacteria   | Pseudomonas sp. B26(2017)                           | hypothetical protein [Pseudomonas sp. B26(2017)].                                       | GCF_002113045.1 |
| WP_139834254.1 | HetE-N1→?→ TPR+GreAB-C+PIN*→                                         | TPR+GreAB-C+PIN         | 686  | -        | Gammaproteobacteria   | Pseudomonas sp. B11(2017)                           | hypothetical protein [Pseudomonas sp. B11(2017)].                                       | GCF_002113285.1 |
| WP_140034365.1 | HetE-N1→ TPR+GreAB-C+PIN*→                                           | TPR+GreAB-C+PIN         | 1111 | -        | Gammaproteobacteria   | Pantoea vagans                                      | hypothetical protein [Pantoea vagans].                                                  | GCF_006385385.1 |
| WP_140089969.1 | GreAB-C*→                                                            | GreAB-C                 | 561  | -        | Gammaproteobacteria   | Vibrio parahaemolyticus                             | hypothetical protein [Vibrio parahaemolyticus].                                         | GCF_006372765.1 |
| WP_140136560.1 | TPR+GreAB-C+PIN*→                                                    | TPR+GreAB-C+PIN         | 381  | -        | Gammaproteobacteria   | Vibrio parahaemolyticus                             | hypothetical protein, partial [Vibrio parahaemolyticus].                                | GCF_006369095.1 |
| WP_140150658.1 | HetE-N1→ TPR+GreAB-C+PIN*→                                           | TPR+GreAB-C+PIN         | 1100 | -        | Gammaproteobacteria   | Vibrio parahaemolyticus                             | hypothetical protein [Vibrio parahaemolyticus].                                         | GCF_006375025.1 |
| WP_140184851.1 | HetE-N1→ TPR+GreAB-C+PIN*→                                           | TPR+GreAB-C+PIN         | 1133 | -        | Gammaproteobacteria   | Vibrio parahaemolyticus                             | hypothetical protein [Vibrio parahaemolyticus].                                         | GCF_006375315.1 |
| WP_140247351.1 | HetE-N1→ TPR+GreAB-C+PIN*→                                           | TPR+GreAB-C+PIN         | 1114 | -        | Gammaproteobacteria   | Vibrio parahaemolyticus                             | hypothetical protein [Vibrio parahaemolyticus].                                         | GCF_006371495.1 |
| WP_140523105.1 | REase+TPR+GreAB-C+PIN*→                                              | REase+TPR+GreAB-C+PIN   | 1330 | -        | Alphaproteobacteria   | unclassified Mesorhizobium                          | MULTISPECIES: tetratricopeptide repeat protein [unclassified Mesorhizobium].            | GCF_006439485.1 |
| WP_140649671.1 | REase+TPR+GreAB-C+PIN*→                                              | REase+TPR+GreAB-C+PIN   | 1330 | -        | Alphaproteobacteria   | Mesorhizobium sp. B2-4-10                           | tetratricopeptide repeat protein [Mesorhizobium sp. B2-4-10].                           | GCF_006442675.1 |
| WP_140682745.1 | HetE-N1→ TPR+GreAB-C+PIN*→                                           | TPR+GreAB-C+PIN         | 1113 | -        | Gammaproteobacteria   | Pseudomonas mandelii                                | hypothetical protein [Pseudomonas mandelii].                                            | GCF_006438925.1 |
| WP_140739373.1 | REase+TPR+GreAB-C+PIN*→                                              | REase+TPR+GreAB-C+PIN   | 994  | -        | Alphaproteobacteria   | unclassified Mesorhizobium                          | MULTISPECIES: hypothetical protein [unclassified Mesorhizobium].                        | GCF_006440845.1 |
| WP_141097119.1 | TPR+GreAB-C+PIN*→                                                    | TPR+GreAB-C+PIN         | 1209 | -        | Actinobacteria        | Microbacterium sp. AISO3                            | hypothetical protein [Microbacterium sp. AISO3].                                        | GCF_002204305.1 |
| WP_141144329.1 | X+PIN*→                                                              | X+PIN                   | 1189 | -        | Actinobacteria        | Schumannella sp. 10F1B-5-1                          | hypothetical protein [Schumannella sp. 10F1B-5-1].                                      | GCF_006517535.1 |
| WP_141202816.1 | TPR+PIN*→                                                            | TPR+PIN                 | 1217 | -        | Actinobacteria        | Streptomyces griseorubiginosus                      | hypothetical protein [Streptomyces griseorubiginosus].                                  | GCF_006516935.1 |
| WP_141414632.1 | HetE-N1→ TPR+GreAB-C+PIN*→                                           | TPR+GreAB-C+PIN         | 1106 | -        | Gammaproteobacteria   | Enterobacter hormaechei                             | hypothetical protein [Enterobacter hormaechei].                                         | GCF_006546545.1 |
| WP_141566570.1 | TPR+PIN*→                                                            | TPR+PIN                 | 1237 | -        | -                     | Pseudonocardia sp. N23                              | hypothetical protein [Pseudonocardia sp. N23].                                          | GCF_002583555.1 |
| WP_141708179.1 | REase+TPR+GreAB-C+PIN*→                                              | REase+TPR+GreAB-C+PIN   | 1338 | -        | Actinobacteria        | Micromonospora marina                               | hypothetical protein [Micromonospora marina].                                           | GCF_900091565.1 |
| WP_141709791.1 | TPR+PIN*→   <-NUDIX                                                  | TPR+PIN                 | 1088 | -        | Actinobacteria        | Streptomyces                                        | MULTISPECIES: hypothetical protein [Streptomyces].                                      | GCF_000514055.1 |
| WP_142342557.1 | TPR+PIN*→                                                            | TPR+PIN                 | 1016 | -        | Firmicutes            | Bacillus cereus                                     | hypothetical protein [Bacillus cereus].                                                 | GCF_002577165.1 |
| WP_142621974.1 | TPR+GreAB-C+PIN*→                                                    | TPR+GreAB-C+PIN         | 456  | -        | Gammaproteobacteria   | Vibrio cholerae                                     | hypothetical protein [Vibrio cholerae].                                                 | GCF_006802685.1 |
| WP_142996755.1 | <-REase  TPR+PIN*→                                                   | TPR+PIN                 | 993  | -        | Firmicutes            | Bacillus sp. KQ-3                                   | hypothetical protein [Bacillus sp. KQ-3].                                               | GCF_003710255.1 |
| WP_143042354.1 | REase+TPR+GreAB-C+PIN*→                                              | REase+TPR+GreAB-C+PIN   | 1329 | -        | Alphaproteobacteria   | Citriimonas salinaria                               | restriction endonuclease [Citriimonas salinaria].                                       | GCF_900107235.1 |
| WP_143064837.1 | TPR+PIN*→                                                            | TPR+PIN                 | 1134 | -        | Actinobacteria        | Streptomyces sp. PAN_FS17                           | hypothetical protein [Streptomyces sp. PAN_FS17].                                       | GCF_900105465.1 |
| WP_143167506.1 | REase+TPR+GreAB-C+PIN*→                                              | REase+TPR+GreAB-C+PIN   | 1482 | -        | Betaproteobacteria    | Massilia sp. CF038                                  | hypothetical protein [Massilia sp. CF038].                                              | GCF_900129765.1 |
| WP_143171741.1 | PAIREDC-HTH→ REase+TPR+GreAB-C+PIN*→                                 | REase+TPR+GreAB-C+PIN   | 1539 | -        | Betaproteobacteria    | Rhizobacter sp. OV335                               | hypothetical protein [Rhizobacter sp. OV335].                                           | GCF_900142965.1 |
| WP_143206624.1 | REase+TPR+GreAB-C+PIN*→                                              | REase+TPR+GreAB-C+PIN   | 1273 | -        | Planctomycetes        | Singulisphaera sp. GP187                            | hypothetical protein [Singulisphaera sp. GP187].                                        | GCF_900129635.1 |
| WP_143268820.1 | REase+TPR+GreAB-C+PIN→ PIN*→                                         | PIN                     | 279  | -        | Actinobacteria        | Amycolatopsis vastitatis                            | hypothetical protein [Amycolatopsis vastitatis].                                        | GCF_002234595.1 |
| WP_143494315.1 | DOC+HTH→ REase+TOPC→ HetE-N1→ HetE-N1+TPR+GreAB-C+PIN*→              | HetE-N1+TPR+GreAB-C+PIN | 1124 | -        | Gammaproteobacteria   | Pseudomonas putida                                  | hypothetical protein [Pseudomonas putida].                                              | GCF_007049805.1 |
| WP_143685467.1 | TPR+PIN*→                                                            | TPR+PIN                 | 1135 | -        | Actinobacteria        | Streptomyces sp. 1222.2                             | hypothetical protein [Streptomyces sp. 1222.2].                                         | GCF_900215595.1 |
| WP_143686526.1 | TPR+PIN*→                                                            | TPR+PIN                 | 1189 | -        | Actinobacteria        | Streptomyces sp. 61                                 | hypothetical protein [Streptomyces sp. 61].                                             | GCF_002754535.1 |
| WP_143775988.1 | REase+TPR+GreAB-C+PIN*→                                              | REase+TPR+GreAB-C+PIN   | 1312 | -        | Alphaproteobacteria   | Sphingorhabdus contaminans                          | hypothetical protein [Sphingorhabdus contaminans].                                      | GCF_007280415.1 |
| WP_144044861.1 | HetE-N1→ GreAB-C*→ TPR+GreAB-C+PIN→                                  | GreAB-C                 | 779  | -        | Gammaproteobacteria   | Shewanella sp. YLB-06                               | GreA/GreB family elongation factor [Shewanella sp. YLB-06].                             | GCF_007197555.1 |

| acc            | operon                                   | architecture              | len  | gen.name | taxend              | species                                 | define                                                          | gca             |
|----------------|------------------------------------------|---------------------------|------|----------|---------------------|-----------------------------------------|-----------------------------------------------------------------|-----------------|
| WP_144084411.1 | HetE-N1→ TPR+TPR+GreAB-C+PIN*→           | TPR+TPR+GreAB-C+PIN       | 1108 | -        | Gammaproteobacteria | <i>Pseudomonas monteilii</i>            | hypothetical protein [Pseudomonas monteilii].                   | GCF_000510285.1 |
| WP_144190111.1 | HetE-N1→ TPR+GreAB-C+PIN*→               | TPR+GreAB-C+PIN           | 1126 | -        | Gammaproteobacteria | <i>Gilliamella apicola</i>              | hypothetical protein [Gilliamella apicola].                     | GCF_007559165.1 |
| WP_144217154.1 | TPR+GreAB-C+PIN*→                        | TPR+GreAB-C+PIN           | 1236 | -        | Gammaproteobacteria | <i>Vibrio cholerae</i>                  | hypothetical protein [Vibrio cholerae].                         | GCF_007623805.1 |
| WP_144226215.1 | HetE-N1→ TPR+GreAB-C+PIN*→               | TPR+GreAB-C+PIN           | 1101 | -        | Gammaproteobacteria | <i>Shewanella algae</i>                 | hypothetical protein [Shewanella algae].                        | GCF_007595165.1 |
| WP_144269797.1 | REase+TPR+GreAB-C+PIN*→                  | REase+TPR+GreAB-C+PIN     | 1288 | -        | Gammaproteobacteria | <i>Pseudomonas fluorescens</i>          | DUF4365 domain-containing protein [Pseudomonas fluorescens].    | GCF_000262325.2 |
| WP_144298906.1 | X+PIN*→                                  | X+PIN                     | 676  | -        | Actinobacteria      | <i>Streptomyces</i> sp. TLI_235         | hypothetical protein [Streptomyces sp. TLI_235].                | GCF_002300355.1 |
| WP_144431187.1 | REase+TPR+GreAB-C+PIN*→                  | REase+TPR+GreAB-C+PIN     | 1441 | -        | Gammaproteobacteria | <i>Pseudomonas syringae</i> pv. coryli  | hypothetical protein [Pseudomonas syringae pv. coryli].         | GCF_000972175.1 |
| WP_144762711.1 | X+PIN*→                                  | X+PIN                     | 1177 | -        | Actinobacteria      | <i>Curtobacterium</i> sp. 9128          | hypothetical protein [Curtobacterium sp. 9128].                 | GCF_007673775.1 |
| WP_144916164.1 | TPR+GreAB-C+PIN→ PIN*→                   | PIN                       | 238  | -        | Bacteroidetes       | <i>Mucilaginibacter frigoritolerans</i> | hypothetical protein [Mucilaginibacter frigoritolerans].        | GCF_007830615.1 |
| WP_145052948.1 | TPR+PIN*→                                | TPR+PIN                   | 1410 | -        | Planctomycetes      | <i>Lignipirellula cremea</i>            | hypothetical protein [Lignipirellula cremea].                   | GCF_007751035.1 |
| WP_145376920.1 | TPR+PIN*→                                | TPR+PIN                   | 2081 | -        | Planctomycetes      | <i>Symmachiella dynata</i>              | hypothetical protein [Symmachiella dynata].                     | GCF_007747995.1 |
| WP_145427683.1 | REase+TPR+GreAB-C+PIN→ TPR+GreAB-C+PIN*→ | TPR+GreAB-C+PIN           | 514  | -        | Planctomycetes      | <i>Symmachiella dynata</i>              | hypothetical protein [Symmachiella dynata].                     | GCF_007744975.1 |
| WP_145441613.1 | TPR+PIN*→                                | TPR+PIN                   | 2077 | -        | Planctomycetes      | <i>Gimesia chilikensis</i>              | hypothetical protein [Gimesia chilikensis].                     | GCF_007746535.1 |
| WP_145577942.1 | HetE-N1→ TPR+GreAB-C+PIN*→               | TPR+GreAB-C+PIN           | 1084 | -        | Gammaproteobacteria | <i>Vibrio crassostreae</i>              | hypothetical protein [Vibrio crassostreae].                     | GCF_017916675.1 |
| WP_145860820.1 | TPR+GreAB-C+PIN→ PIN*→                   | PIN                       | 347  | -        | Bacteroidetes       | <i>Pedobacter suwonensis</i>            | hypothetical protein [Pedobacter suwonensis].                   | GCF_007833675.1 |
| WP_145895823.1 | REase+TPR+GreAB-C+PIN*→                  | REase+TPR+GreAB-C+PIN     | 1508 | -        | Betaproteobacteria  | <i>Caenimonas</i> sp. HX-9-20           | hypothetical protein [Caenimonas sp. HX-9-20].                  | GCF_007833165.1 |
| WP_145923949.1 | TPR+GreAB-C+PIN*→                        | TPR+GreAB-C+PIN           | 1170 | -        | Gammaproteobacteria | <i>Pseudomonas citronellolis</i>        | hypothetical protein [Pseudomonas citronellolis].               | GCF_001586155.1 |
| WP_145975538.1 | REase+TPR+GreAB-C+PIN*→                  | REase+TPR+GreAB-C+PIN     | 1365 | -        | Deinococci          | <i>Deinococcus gobiensis</i>            | hypothetical protein [Deinococcus gobiensis].                   | GCF_000252445.1 |
| WP_145980369.1 | HetE-N1→ TPR+GreAB-C+PIN*→               | TPR+GreAB-C+PIN           | 1113 | -        | Gammaproteobacteria | <i>Pseudomonas lurida</i>               | hypothetical protein [Pseudomonas lurida].                      | GCF_001708485.1 |
| WP_145994348.1 | REase+TPR+TPR+GreAB-C+PIN*→              | REase+TPR+TPR+GreAB-C+PIN | 1339 | -        | Alphaproteobacteria | <i>Mesorhizobium loti</i>               | hypothetical protein [Mesorhizobium loti].                      | GCF_002858745.1 |
| WP_146048182.1 | PIN*→                                    | PIN                       | 371  | -        | Gammaproteobacteria | <i>Acinetobacter</i> sp. ACNIH3         | hypothetical protein [Acinetobacter sp. ACNIH3].                | GCF_002918965.1 |
| WP_146113387.1 | TPR+PIN*→                                | TPR+PIN                   | 1210 | -        | Actinobacteria      | unclassified Arthrobacter               | MULTISPECIES: hypothetical protein [unclassified Arthrobacter]. | GCF_002975405.1 |
| WP_146162727.1 | TPR+GreAB-C+PIN*→                        | TPR+GreAB-C+PIN           | 1197 | -        | Gammaproteobacteria | <i>Vibrio splendidus</i>                | hypothetical protein [Vibrio splendidus].                       | GCF_003050425.1 |
| WP_146163497.1 | HetE-N1→ TPR+GreAB-C+PIN*→               | TPR+GreAB-C+PIN           | 1094 | -        | Gammaproteobacteria | <i>Aeromonas veronii</i>                | hypothetical protein [Aeromonas veronii].                       | GCF_003036425.1 |
| WP_146169670.1 | REase+TPR+GreAB-C+PIN*→                  | REase+TPR+GreAB-C+PIN     | 1355 | -        | Actinobacteria      | <i>Actinoplanes italicus</i>            | hypothetical protein [Actinoplanes italicus].                   | GCF_016862235.1 |
| WP_146174202.1 | TPR+GreAB-C+PIN*→                        | TPR+GreAB-C+PIN           | 1185 | -        | Alphaproteobacteria | <i>Litoreibacter ponti</i>              | hypothetical protein [Litoreibacter ponti].                     | GCF_003054285.1 |
| WP_146175347.1 | X+PIN*→                                  | X+PIN                     | 1323 | -        | Actinobacteria      | <i>Conexibacter</i> sp. Seoho-28        | hypothetical protein [Conexibacter sp. Seoho-28].               | GCF_003044185.1 |
| WP_146181743.1 | HetE-N1→ TPR+GreAB-C+PIN*→               | TPR+GreAB-C+PIN           | 1094 | -        | Gammaproteobacteria | <i>Aeromonas</i> sp. HMWF014            | hypothetical protein [Aeromonas sp. HMWF014].                   | GCF_003061085.1 |
| WP_146562359.1 | TPR+GreAB-C+PIN*→                        | TPR+GreAB-C+PIN           | 1275 | -        | Planctomycetes      | <i>Posidoniimonas corsicana</i>         | hypothetical protein [Posidoniimonas corsicana].                | GCF_007859765.1 |
| WP_146571406.1 | REase+TPR+GreAB-C+PIN*→                  | REase+TPR+GreAB-C+PIN     | 1140 | -        | Planctomycetes      | <i>Botrimarina hoheduenensis</i>        | hypothetical protein [Botrimarina hoheduenensis].               | GCF_007859815.1 |
| WP_146752056.1 | TPR+GreAB-C+PIN*→                        | TPR+GreAB-C+PIN           | 1230 | -        | Actinobacteria      | <i>Microbacterium</i> sp. SMR1          | hypothetical protein [Microbacterium sp. SMR1].                 | GCF_003289625.1 |
| WP_146766012.1 | TPR+GreAB-C+PIN*→                        | TPR+GreAB-C+PIN           | 1147 | -        | Gammaproteobacteria | <i>Pseudomonas</i>                      | MULTISPECIES: hypothetical protein [Pseudomonas].               | GCF_013522795.1 |
| WP_146779203.1 | TPR+GreAB-C+PIN*→                        | TPR+GreAB-C+PIN           | 1133 | -        | Bacteroidetes       | <i>Flavobacterium psychrolimnae</i>     | hypothetical protein [Flavobacterium psychrolimnae].            | GCF_003312425.1 |
| WP_146877508.1 | TPR+GreAB-C+PIN*→                        | TPR+GreAB-C+PIN           | 1076 | -        | Actinobacteria      | <i>Actinomadura madurae</i>             | hypothetical protein [Actinomadura madurae].                    | GCF_900445005.1 |
| WP_146915636.1 | TIR→ TPR+GreAB-C+PIN*→   <-HTH           | TPR+GreAB-C+PIN           | 1255 | -        | Bacteroidetes       | <i>Algoriphagus aquimarinus</i>         | hypothetical protein [Algoriphagus aquimarinus].                | GCF_007997215.1 |
| WP_146943293.1 | TPR+GreAB-C+PIN*→                        | TPR+GreAB-C+PIN           | 1126 | -        | Bacteroidetes       | <i>Chryseobacterium hagamense</i>       | hypothetical protein [Chryseobacterium hagamense].              | GCF_007991455.1 |
| WP_146990354.1 | REase+TPR+TPR+GreAB-C+PIN*→              | REase+TPR+TPR+GreAB-C+PIN | 1315 | -        | Alphaproteobacteria | <i>Bradyrhizobium macuxiense</i>        | hypothetical protein [Bradyrhizobium macuxiense].               | GCF_007993935.1 |
| WP_147282746.1 | HetE-N1→ TPR+GreAB-C+PIN*→               | TPR+GreAB-C+PIN           | 1118 | -        | Betaproteobacteria  | <i>Comamonas</i> sp. AG1104             | hypothetical protein [Comamonas sp. AG1104].                    | GCF_003350425.1 |
| WP_147289649.1 | HetE-N1→ TPR+GreAB-C+PIN*→               | TPR+GreAB-C+PIN           | 1110 | -        | Gammaproteobacteria | <i>Pantoea agglomerans</i>              | hypothetical protein [Pantoea agglomerans].                     | GCF_900454505.1 |
| WP_147309007.1 | REase+TPR+GreAB-C+PIN→?→ PIN*→           | PIN                       | 256  | -        | Betaproteobacteria  | <i>Cupriavidus taiwanensis</i>          | hypothetical protein [Cupriavidus taiwanensis].                 | GCF_900249855.1 |
| WP_147316401.1 | TPR+GreAB-C+PIN*→                        | TPR+GreAB-C+PIN           | 1139 | -        | Gammaproteobacteria | <i>Pseudomonas aeruginosa</i>           | hypothetical protein [Pseudomonas aeruginosa].                  | GCF_003412045.2 |
| WP_147329285.1 | X+PIN*→ HTH→?→?→ HTH→                    | X+PIN                     | 1180 | -        | Firmicutes          | <i>Dorea formicigenerans</i>            | hypothetical protein [Dorea formicigenerans].                   | GCF_003437395.1 |
| WP_147334977.1 | TM+TM+TPR+PIN*→                          | TM+TM+TPR+PIN             | 1154 | -        | Bacteroidetes       | <i>Phocaeicola coprocola</i>            | hypothetical protein [Phocaeicola coprocola].                   | GCF_003458565.1 |

| acc            | operon                                                  | architecture              | len  | gen.name | taxend              | species                      | define                                                                              | gca             |
|----------------|---------------------------------------------------------|---------------------------|------|----------|---------------------|------------------------------|-------------------------------------------------------------------------------------|-----------------|
| WP_147344604.1 | Mbetalac→ Trypsin→?→ TPR+PIN*→                          | TPR+PIN                   | 1394 | -        | Firmicutes          | Eubacterium sp. AM49-13BH    | hypothetical protein, partial [Eubacterium sp. AM49-13BH].                          | GCF_003464165.1 |
| WP_147352805.1 | Mbetalac→ Trypsin→ TPR+PIN*→                            | TPR+PIN                   | 1645 | -        | Firmicutes          | Clostridium sp. AM48-13      | hypothetical protein [Clostridium sp. AM48-13].                                     | GCF_003478455.1 |
| WP_147353595.1 | Mbetalac→ Trypsin+TPR+PIN*→                             | Trypsin+TPR+PIN           | 1710 | -        | Firmicutes          | Clostridium sp. AF37-7       | trypsin-like peptidase domain-containing protein, partial [Clostridium sp. AF37-7]. | GCF_003477595.1 |
| WP_147364185.1 | X+PIN*→ HTH→?→?→ HTH→                                   | X+PIN                     | 1179 | -        | Firmicutes          | Dorea formicigenerans        | hypothetical protein [Dorea formicigenerans].                                       | GCF_003475555.1 |
| WP_147402393.1 | TPR+GreAB-C+PIN*→                                       | TPR+GreAB-C+PIN           | 1139 | -        | Gammaproteobacteria | Pseudomonas aeruginosa       | hypothetical protein [Pseudomonas aeruginosa].                                      | GCF_003585235.1 |
| WP_147402585.1 | DOC+HTH→ REase+TOPC→ HetE-N1→ HetE-N1+TPR+GreAB-C+PIN*→ | HetE-N1+TPR+GreAB-C+PIN   | 1123 | -        | Gammaproteobacteria | Pseudomonas aeruginosa       | hypothetical protein [Pseudomonas aeruginosa].                                      | GCF_003585225.1 |
| WP_147432801.1 | REase+TPR+GreAB-C+PIN*→                                 | REase+TPR+GreAB-C+PIN     | 1375 | -        | Actinobacteria      | Catellatospora citrea        | hypothetical protein [Catellatospora citrea].                                       | GCF_016862615.1 |
| WP_147432945.1 | <-TIR<-?  REase+TPR+GreAB-C+PIN*→                       | REase+TPR+GreAB-C+PIN     | 1245 | -        | Actinobacteria      | Catellatospora citrea        | DUF4365 domain-containing protein [Catellatospora citrea].                          | GCF_016862615.1 |
| WP_147450330.1 | REase+TPR+GreAB-C+PIN*→                                 | REase+TPR+GreAB-C+PIN     | 1306 | -        | Deltaproteobacteria | Corallococcus carmarthensis  | hypothetical protein [Corallococcus carmarthensis].                                 | GCF_003611695.1 |
| WP_147453837.1 | TPR+PIN*→ PAIREDC-HTH→                                  | TPR+PIN                   | 1206 | -        | Actinobacteria      | Nocardiopsis sp. Huas11      | hypothetical protein [Nocardiopsis sp. Huas11].                                     | GCF_003634495.1 |
| WP_147481098.1 | TPR+PIN*→                                               | TPR+PIN                   | 1134 | -        | Actinobacteria      | Streptomyces shenzhenensis   | tetratricopeptide repeat protein [Streptomyces shenzhenensis].                      | GCF_003688995.1 |
| WP_147627327.1 | REase+TPR+GreAB-C+PIN→ SIG+HIN-HTH→?→ PIN*→             | PIN                       | 507  | -        | Gammaproteobacteria | Rhodanobacter glycinis       | hypothetical protein [Rhodanobacter glycinis].                                      | GCF_008000795.1 |
| WP_147831354.1 | TPR+GreAB-C+PIN*→                                       | TPR+GreAB-C+PIN           | 1107 | -        | Alphaproteobacteria | Methylobacterium sp. WL19    | hypothetical protein [Methylobacterium sp. WL19].                                   | GCF_008040005.1 |
| WP_147893054.1 | X+PIN*→                                                 | X+PIN                     | 1120 | -        | Actinobacteria      | Microbacterium hatanonis     | hypothetical protein [Microbacterium hatanonis].                                    | GCF_008017415.1 |
| WP_148210527.1 | TPR+GreAB-C+PIN*→                                       | TPR+GreAB-C+PIN           | 1107 | -        | Alphaproteobacteria | Beijerinckia indica          | hypothetical protein [Beijerinckia indica].                                         | GCF_000019845.1 |
| WP_148306266.1 | TPR+GreAB-C+PIN*→                                       | TPR+GreAB-C+PIN           | 1259 | -        | Gemmatimonadetes    | Gemmatirosa kalamazoonesis   | hypothetical protein [Gemmatirosa kalamazoonesis].                                  | GCF_000522985.1 |
| WP_148421250.1 | <-MarR-HTH  ?→?→?→   <-?  ?→ HetE-N1→ TPR+GreAB-C+PIN*→ | TPR+GreAB-C+PIN           | 1117 | -        | Gammaproteobacteria | Enterobacter cloacae         | hypothetical protein [Enterobacter cloacae].                                        | GCF_013376835.1 |
| WP_148564915.1 | REase+TPR+GreAB-C+PIN*→                                 | REase+TPR+GreAB-C+PIN     | 1243 | -        | Gammaproteobacteria | Stenotrophomonas maltophilia | hypothetical protein [Stenotrophomonas maltophilia].                                | GCF_001274595.1 |
| WP_149326491.1 | HetE-N1→ TPR+GreAB-C+PIN*→ PhospholipaseD→              | TPR+GreAB-C+PIN           | 1103 | -        | Gammaproteobacteria | Halomonas sp. L5             | hypothetical protein [Halomonas sp. L5].                                            | GCF_008297955.1 |
| WP_149369557.1 | TPR+PIN*→                                               | TPR+PIN                   | 1189 | -        | Actinobacteria      | Mycolicibacterium sp. P9-64  | hypothetical protein [Mycolicibacterium sp. P9-64].                                 | GCF_008329605.1 |
| WP_150024336.1 | TPR+GreAB-C+PIN*→   <-?  HTH→                           | TPR+GreAB-C+PIN           | 804  | -        | Gammaproteobacteria | Acinetobacter baumannii      | GreA/GreB family elongation factor [Acinetobacter baumannii].                       | GCF_008630895.1 |
| WP_150359822.1 | REase+TPR+GreAB-C+PIN*→                                 | REase+TPR+GreAB-C+PIN     | 1240 | -        | Gammaproteobacteria | Stenotrophomonas maltophilia | hypothetical protein [Stenotrophomonas maltophilia].                                | GCF_008693985.1 |
| WP_150409130.1 | REase+TPR+GreAB-C+PIN*→                                 | REase+TPR+GreAB-C+PIN     | 1284 | -        | Gammaproteobacteria | Xanthomonas sacchari         | GreA/GreB family elongation factor [Xanthomonas sacchari].                          | GCF_008705275.1 |
| WP_150412179.1 | REase+TPR+GreAB-C+PIN*→                                 | REase+TPR+GreAB-C+PIN     | 1314 | -        | Alphaproteobacteria | Sphingobium limneticum       | hypothetical protein [Sphingobium limneticum].                                      | GCF_008710155.1 |
| WP_150784121.1 | REase+TPR+GreAB-C+PIN*→                                 | REase+TPR+GreAB-C+PIN     | 1318 | -        | Gammaproteobacteria | Pseudomonas fluorescens      | DUF4365 domain-containing protein [Pseudomonas fluorescens].                        | GCF_902497995.1 |
| WP_150981548.1 | REase+TPR+GreAB-C+PIN*→                                 | REase+TPR+GreAB-C+PIN     | 1329 | -        | Betaproteobacteria  | Cupriavidus pauculus         | GreA/GreB family elongation factor [Cupriavidus pauculus].                          | GCF_008801835.1 |
| WP_151013632.1 | TPR+PIN*→                                               | TPR+PIN                   | 1145 | -        | Actinobacteria      | Micromonospora aurantiaca    | hypothetical protein [Micromonospora aurantiaca].                                   | GCF_008806405.1 |
| WP_151024479.1 | REase+TPR+GreAB-C+PIN*→                                 | REase+TPR+GreAB-C+PIN     | 1499 | -        | Betaproteobacteria  | Castellaniella defragrans    | hypothetical protein [Castellaniella defragrans].                                   | GCF_014203015.1 |
| WP_151868021.1 | TPR+GreAB-C+PIN*→                                       | TPR+GreAB-C+PIN           | 463  | -        | Gammaproteobacteria | Acinetobacter soli           | hypothetical protein, partial [Acinetobacter soli].                                 | GCF_009013695.1 |
| WP_152091999.1 | HetE-N1→ TPR+GreAB-C+PIN*→                              | TPR+GreAB-C+PIN           | 1107 | -        | Gammaproteobacteria | Pseudomonas sp. KUIN-1       | hypothetical protein [Pseudomonas sp. KUIN-1].                                      | GCF_009176725.1 |
| WP_152099374.1 | TPR+GreAB-C+PIN*→                                       | TPR+GreAB-C+PIN           | 1188 | -        | Planctomycetes      | Lacipirellula parvula        | tetratricopeptide repeat protein [Lacipirellula parvula].                           | GCF_009177095.1 |
| WP_152217660.1 | REase+TPR+TPR+GreAB-C+PIN*→                             | REase+TPR+TPR+GreAB-C+PIN | 1333 | -        | Alphaproteobacteria | Parvibaculum sedimenti       | hypothetical protein [Parvibaculum sedimenti].                                      | GCF_009184905.1 |
| WP_152508433.1 | TPR+GreAB-C+PIN*→                                       | TPR+GreAB-C+PIN           | 1208 | -        | Alphaproteobacteria | unclassified Labrenzia       | MULTISPECIES: hypothetical protein [unclassified Labrenzia].                        | GCF_009363315.1 |
| WP_152533063.1 | REase+TPR+GreAB-C+PIN*→                                 | REase+TPR+GreAB-C+PIN     | 1484 | -        | Gammaproteobacteria | Pseudomonas syringae         | hypothetical protein [Pseudomonas syringae].                                        | GCF_000452465.1 |
| WP_152541917.1 | TPR+GreAB-C+PIN*→                                       | TPR+GreAB-C+PIN           | 529  | -        | Bacteroidetes       | Saccharicrinis fermentans    | hypothetical protein [Saccharicrinis fermentans].                                   | GCF_000583675.1 |
| WP_152640028.1 | TPR+GreAB-C+PIN*→                                       | TPR+GreAB-C+PIN           | 395  | -        | Firmicutes          | Blautia obeum                | hypothetical protein [Blautia obeum].                                               | GCF_003463085.1 |

| acc            | operon                                                  | architecture                 | len  | gen.name | taxend              | species                         | define                                                                       | gca             |
|----------------|---------------------------------------------------------|------------------------------|------|----------|---------------------|---------------------------------|------------------------------------------------------------------------------|-----------------|
| WP_152648143.1 | REase+TPR+TPR+GreAB-C+PIN*→                             | REase+TPR+TPR+GreAB-C+PIN    | 1321 | -        | Alphaproteobacteria | Bradyrhizobium elkanii          | hypothetical protein [Bradyrhizobium elkanii].                               | GCF_000878305.1 |
| WP_152803033.1 | REase+TPR+GreAB-C+PIN*→   <-HTH                         | REase+TPR+GreAB-C+PIN        | 1328 | -        | Betaproteobacteria  | Rugamonas sp. FT103W            | hypothetical protein [Rugamonas sp. FT103W].                                 | GCF_009380165.1 |
| WP_152993715.1 | TPR+GreAB-C+PIN*→                                       | TPR+GreAB-C+PIN              | 677  | -        | Gammaproteobacteria | Pseudomonas aeruginosa          | hypothetical protein [Pseudomonas aeruginosa].                               | GCF_001451965.1 |
| WP_153001774.1 | PIN*→                                                   | PIN                          | 483  | -        | Actinobacteria      | Curtobacterium oceanosedimentum | hypothetical protein [Curtobacterium oceanosedimentum].                      | GCF_001476135.1 |
| WP_153041348.1 | TPR+GreAB-C+PIN*→                                       | TPR+GreAB-C+PIN              | 1322 | -        | Alphaproteobacteria | Pseudovibrio sp. Ad5            | hypothetical protein [Pseudovibrio sp. Ad5].                                 | GCF_001623095.1 |
| WP_153065368.1 | REase→ TPR+GreAB-C+PIN*→                                | TPR+GreAB-C+PIN              | 1111 | -        | Gammaproteobacteria | Xanthomonas arboricola          | hypothetical protein [Xanthomonas arboricola].                               | GCF_003352905.1 |
| WP_153226839.1 | TPR+PIN*→                                               | TPR+PIN                      | 1140 | -        | Actinobacteria      | Mycobacteroides salmoniphilum   | hypothetical protein [Mycobacteroides salmoniphilum].                        | GCF_004366855.1 |
| WP_153278476.1 | TM+TPR+PIN*→                                            | TM+TPR+PIN                   | 1138 | -        | Actinobacteria      | Saccharothrix syringae          | hypothetical protein [Saccharothrix syringae].                               | GCF_009498035.1 |
| WP_153574636.1 | TPR+GreAB-C+PIN*→                                       | TPR+GreAB-C+PIN              | 1139 | -        | Gammaproteobacteria | Pseudomonas aeruginosa          | hypothetical protein [Pseudomonas aeruginosa].                               | GCF_000791765.1 |
| WP_153576067.1 | TPR+GreAB-C+PIN*→                                       | TPR+GreAB-C+PIN              | 1170 | -        | Gammaproteobacteria | Pseudomonas aeruginosa          | hypothetical protein [Pseudomonas aeruginosa].                               | GCF_000795585.1 |
| WP_153576415.1 | TPR+GreAB-C+PIN*→                                       | TPR+GreAB-C+PIN              | 1158 | -        | Gammaproteobacteria | Pseudomonas aeruginosa          | hypothetical protein [Pseudomonas aeruginosa].                               | GCF_000796465.1 |
| WP_153786096.1 | TPR+GreAB-C+PIN*→                                       | TPR+GreAB-C+PIN              | 1139 | -        | Gammaproteobacteria | Pseudomonas sp. EMN2            | hypothetical protein [Pseudomonas sp. EMN2].                                 | GCF_009650555.1 |
| WP_154691510.1 | REase+TPR+GreAB-C+PIN*→                                 | REase+TPR+GreAB-C+PIN        | 1325 | -        | Alphaproteobacteria | Novosphingobium sp. Gsoil 351   | hypothetical protein [Novosphingobium sp. Gsoil 351].                        | GCF_009707465.1 |
| WP_154808640.1 | TPR+GreAB-C+PIN*→   <-?<-?<-?<-?  ?→?→ Cas_Cas1→        | TPR+GreAB-C+PIN              | 1207 | -        | Euryarchaeota       | Methanobolus vulcani            | GreA/GreB family elongation factor [Methanobolus vulcani].                   | GCF_006546655.1 |
| WP_154898518.1 | TPR+GreAB-C+PIN*→                                       | TPR+GreAB-C+PIN              | 970  | -        | Planctomycetes      | Gimesia maris                   | GreA/GreB family elongation factor [Gimesia maris].                          | GCF_007747015.1 |
| WP_155001003.1 | TPR+GreAB-C+PIN*→                                       | TPR+GreAB-C+PIN              | 1157 | -        | Gammaproteobacteria | Pseudomonas fluorescens         | hypothetical protein [Pseudomonas fluorescens].                              | GCF_902497965.1 |
| WP_155247385.1 | REase+TPR+GreAB-C+PIN*→                                 | REase+TPR+GreAB-C+PIN        | 1356 | -        | Actinobacteria      | Salinispora arenicola           | hypothetical protein [Salinispora arenicola].                                | GCF_000375205.1 |
| WP_155347963.1 | REase+TPR+GreAB-C+PIN*→                                 | REase+TPR+GreAB-C+PIN        | 1228 | -        | Actinobacteria      | Acrocarpospora pleiomorpha      | DUF4365 domain-containing protein [Acrocarpospora pleiomorpha].              | GCF_009687885.1 |
| WP_155468027.1 | REase+TPR+GreAB-C+PIN*→                                 | REase+TPR+GreAB-C+PIN        | 1410 | -        | Betaproteobacteria  | Duganella radialis              | DUF4365 domain-containing protein [Duganella radialis].                      | GCF_009720825.1 |
| WP_155543363.1 | REase+TPR+GreAB-C+PIN*→                                 | REase+TPR+GreAB-C+PIN        | 1179 | -        | Actinobacteria      | Amycolatopsis sp. A23           | DUF4365 domain-containing protein [Amycolatopsis sp. A23].                   | GCF_902497555.1 |
| WP_155546438.1 | REase+TPR+GreAB-C+PIN*→                                 | REase+TPR+GreAB-C+PIN        | 1244 | -        | Actinobacteria      | Amycolatopsis sp. A23           | DUF4365 domain-containing protein [Amycolatopsis sp. A23].                   | GCF_902497555.1 |
| WP_155620995.1 | TPR+PIN*→                                               | TPR+PIN                      | 1179 | -        | Firmicutes          | Paenibacillus macerans          | hypothetical protein [Paenibacillus macerans].                               | GCF_009725145.1 |
| WP_155672395.1 | HetE-N1→ TPR+GreAB-C+PIN*→                              | TPR+GreAB-C+PIN              | 1088 | -        | Gammaproteobacteria | Aliivibrio fischeri             | hypothetical protein [Aliivibrio fischeri].                                  | GCF_009727805.1 |
| WP_155681246.1 | DOC+HTH→ REase+TOPC→ HetE-N1→ HetE-N1+TPR+GreAB-C+PIN*→ | HetE-N1+TPR+GreAB-C+PIN      | 1123 | -        | Gammaproteobacteria | Pseudomonas aeruginosa          | hypothetical protein [Pseudomonas aeruginosa].                               | GCF_009727245.1 |
| WP_155728442.1 | HetE-N1→ MNS-Npun2340+TPR+GreAB-C+PIN*→                 | MNS-Npun2340+TPR+GreAB-C+PIN | 1094 | -        | Gammaproteobacteria | Aeromonas veronii               | hypothetical protein [Aeromonas veronii].                                    | GCF_001593245.1 |
| WP_155754272.1 | REase+TPR+GreAB-C+PIN*→                                 | REase+TPR+GreAB-C+PIN        | 1265 | -        | Betaproteobacteria  | Burkholderia vietnamiensis      | hypothetical protein [Burkholderia vietnamiensis].                           | GCF_001528565.1 |
| WP_155849001.1 | TPR+PIN*→                                               | TPR+PIN                      | 1211 | -        | Actinobacteria      | Amycolatopsis vancoresmycina    | hypothetical protein [Amycolatopsis vancoresmycina].                         | GCF_000388135.1 |
| WP_155854387.1 | TPR+PIN*→                                               | TPR+PIN                      | 1219 | -        | Actinobacteria      | Arthrobacter sp. MA-N2          | hypothetical protein [Arthrobacter sp. MA-N2].                               | GCF_000517125.1 |
| WP_155858633.1 | REase+TPR+GreAB-C+PIN*→                                 | REase+TPR+GreAB-C+PIN        | 1245 | -        | Gammaproteobacteria | Acinetobacter soli              | hypothetical protein [Acinetobacter soli].                                   | GCF_001953195.1 |
| WP_155950759.1 | HetE-N1→ TPR+TPR+GreAB-C+PIN*→                          | TPR+TPR+GreAB-C+PIN          | 1108 | -        | Gammaproteobacteria | Pseudomonas taiwanensis         | hypothetical protein [Pseudomonas taiwanensis].                              | GCF_000425785.1 |
| WP_155952204.1 | REase+TPR+GreAB-C+PIN*→                                 | REase+TPR+GreAB-C+PIN        | 1443 | -        | Gammaproteobacteria | Pseudomonas sp. CHM02           | hypothetical protein [Pseudomonas sp. CHM02].                                | GCF_000612585.1 |
| WP_155956985.1 | HTH+PNPase+TPR+GreAB-C+PIN*→                            | HTH+PNPase+TPR+GreAB-C+PIN   | 1520 | -        | Actinobacteria      | Rhodococcus sp. UNC23MFCrub1.1  | helix-turn-helix domain-containing protein [Rhodococcus sp. UNC23MFCrub1.1]. | GCF_000686025.1 |
| WP_156093738.1 | REase+TPR+GreAB-C+PIN*→                                 | REase+TPR+GreAB-C+PIN        | 1179 | -        | Actinobacteria      | Lentzea aerocolonigenes         | DUF4365 domain-containing protein [Lentzea aerocolonigenes].                 | GCF_000974445.1 |
| WP_156124401.1 | HetE-N1→ HetE-N1+TPR+GreAB-C+PIN*→                      | HetE-N1+TPR+GreAB-C+PIN      | 1122 | -        | Betaproteobacteria  | Achromobacter sp. RTa           | hypothetical protein [Achromobacter sp. RTa].                                | GCF_000757485.1 |
| WP_156177573.1 | REase+TPR+GreAB-C+PIN*→                                 | REase+TPR+GreAB-C+PIN        | 1471 | -        | Gammaproteobacteria | Pseudomonas sp. CCOS 191        | hypothetical protein [Pseudomonas sp. CCOS 191].                             | GCF_001007005.1 |
| WP_156289500.1 | TPR+PIN*→                                               | TPR+PIN                      | 1076 | -        | Firmicutes          | Oceanobacillus salinisoli       | hypothetical protein [Oceanobacillus salinisoli].                            | GCF_009733865.1 |
| WP_156340841.1 | REase+TPR+GreAB-C+PIN*→                                 | REase+TPR+GreAB-C+PIN        | 1470 | -        | Gammaproteobacteria | Pseudomonas sp. NBRC 111124     | hypothetical protein [Pseudomonas sp. NBRC 111124].                          | GCF_001320245.1 |

| acc            | operon                                              | architecture              | len  | gen.name | taxend              | species                             | define                                                            | gca             |
|----------------|-----------------------------------------------------|---------------------------|------|----------|---------------------|-------------------------------------|-------------------------------------------------------------------|-----------------|
| WP_156343172.1 | REase+TPR+GreAB-C+PIN*→                             | REase+TPR+GreAB-C+PIN     | 1368 | -        | Gammaproteobacteria | <i>Pseudomonas</i> sp. NBRC 111134  | hypothetical protein [Pseudomonas sp. NBRC 111134].               | GCF_001320655.1 |
| WP_156369768.1 | TPR+PIN*→                                           | TPR+PIN                   | 1065 | -        | Actinobacteria      | <i>Arthrobacter</i> sp. Leaf145     | hypothetical protein [Arthrobacter sp. Leaf145].                  | GCF_001423565.1 |
| WP_156457128.1 | TPR+GreAB-C+PIN*→                                   | TPR+GreAB-C+PIN           | 1119 | -        | Alphaproteobacteria | <i>Bradyrhizobium</i> sp. CCH5-F6   | hypothetical protein [Bradyrhizobium sp. CCH5-F6].                | GCF_001556045.1 |
| WP_156523151.1 | REase+TPR+GreAB-C+PIN*→                             | REase+TPR+GreAB-C+PIN     | 1289 | -        | Betaproteobacteria  | <i>Bordetella</i> ansorpii          | hypothetical protein [Bordetella ansorpii].                       | GCF_900078315.1 |
| WP_156681909.1 | -                                                   | -                         | 1775 | -        | Actinobacteria      | <i>Rhodococcus</i> sp. SC4          | helix-turn-helix domain-containing protein [Rhodococcus sp. SC4]. | -               |
| WP_156749419.1 | TPR+PIN*→                                           | TPR+PIN                   | 1166 | -        | Actinobacteria      | <i>Mycobacterium</i> sp. E1747      | hypothetical protein [Mycobacterium sp. E1747].                   | GCF_001667775.1 |
| WP_156792330.1 | HetE-N1→ TPR+GreAB-C+PIN*→                          | TPR+GreAB-C+PIN           | 1110 | -        | Deltaproteobacteria | <i>Desulfotalea psychrophila</i>    | hypothetical protein [Desulfotalea psychrophila].                 | GCF_000025945.1 |
| WP_156831299.1 | REase+TPR+GreAB-C+PIN*→                             | REase+TPR+GreAB-C+PIN     | 1304 | -        | Gammaproteobacteria | <i>Arhodomonas aquaeolei</i>        | hypothetical protein [Arhodomonas aquaeolei].                     | GCF_000374645.1 |
| WP_156924526.1 | REase+TPR+GreAB-C+PIN*→                             | REase+TPR+GreAB-C+PIN     | 1326 | -        | Betaproteobacteria  | <i>Derxia gummosa</i>               | hypothetical protein [Derxia gummosa].                            | GCF_000482785.1 |
| WP_156945361.1 | REase+TPR+GreAB-C+PIN*→                             | REase+TPR+GreAB-C+PIN     | 1305 | -        | Alphaproteobacteria | <i>Hyphomonas johnsonii</i>         | hypothetical protein [Hyphomonas johnsonii].                      | GCF_000685275.1 |
| WP_156971043.1 | TPR+GreAB-C+PIN*→                                   | TPR+GreAB-C+PIN           | 1141 | -        | Alphaproteobacteria | <i>Beijerinckia mobilis</i>         | tetratricopeptide repeat protein [Beijerinckia mobilis].          | GCF_000745425.1 |
| WP_157119081.1 | REase+TPR+GreAB-C+PIN*→                             | REase+TPR+GreAB-C+PIN     | 1521 | -        | Betaproteobacteria  | <i>Azohydromonas lata</i>           | hypothetical protein [Azohydromonas lata].                        | GCF_001571085.1 |
| WP_157228354.1 | TPR+PIN*→                                           | TPR+PIN                   | 1070 | -        | Actinobacteria      | <i>Gordonia amicalis</i>            | hypothetical protein [Gordonia amicalis].                         | GCF_000332995.1 |
| WP_157237724.1 | TPR+GreAB-C+PIN*→                                   | TPR+GreAB-C+PIN           | 801  | -        | Deltaproteobacteria | <i>Desulfobacter curvatus</i>       | hypothetical protein [Desulfobacter curvatus].                    | GCF_000373985.1 |
| WP_157376943.1 | REase+TPR+GreAB-C+PIN*→                             | REase+TPR+GreAB-C+PIN     | 1354 | -        | Betaproteobacteria  | <i>Burkholderia ubonensis</i>       | hypothetical protein [Burkholderia ubonensis].                    | GCF_001523425.1 |
| WP_157516442.1 | TPR+PIN*→                                           | TPR+PIN                   | 1239 | -        | Actinobacteria      | <i>Oerskovia enterophila</i>        | hypothetical protein [Oerskovia enterophila].                     | GCF_001624335.1 |
| WP_157553798.1 | X+PIN*→?→ Calcineurin→                              | X+PIN                     | 1140 | -        | Actinobacteria      | <i>Microbacterium hominis</i>       | hypothetical protein [Microbacterium hominis].                    | GCF_001592125.1 |
| WP_157561005.1 | TPR+PIN*→                                           | TPR+PIN                   | 758  | -        | Actinobacteria      | <i>Humibacter albus</i>             | hypothetical protein [Humibacter albus].                          | GCF_000421825.1 |
| WP_157621026.1 | HetE-N1→ TPR+GreAB-C+PIN*→                          | TPR+GreAB-C+PIN           | 1092 | -        | Gammaproteobacteria | <i>Vibrio</i> sp. HENC-03           | hypothetical protein [Vibrio sp. HENC-03].                        | GCF_000305755.2 |
| WP_157678465.1 | REase+TPR+GreAB-C+PIN*→                             | REase+TPR+GreAB-C+PIN     | 1297 | -        | Alphaproteobacteria | <i>Mesorhizobium</i> sp. WSM1497    | hypothetical protein [Mesorhizobium sp. WSM1497].                 | GCF_001672455.2 |
| WP_157721532.1 | REase+TPR+GreAB-C+PIN*→                             | REase+TPR+GreAB-C+PIN     | 1240 | -        | Gammaproteobacteria | <i>Stenotrophomonas</i> sp. WZN-1   | hypothetical protein [Stenotrophomonas sp. WZN-1].                | GCF_002192255.1 |
| WP_157768703.1 | REase+TPR+GreAB-C+PIN*→                             | REase+TPR+GreAB-C+PIN     | 1380 | -        | Betaproteobacteria  | <i>Acidovorax avenae</i>            | hypothetical protein [Acidovorax avenae].                         | GCF_000176855.2 |
| WP_157788679.1 | REase+TPR+GreAB-C+PIN*→                             | REase+TPR+GreAB-C+PIN     | 1382 | -        | Gammaproteobacteria | <i>Pseudomonas fluorescens</i>      | GreA/GreB family elongation factor [Pseudomonas fluorescens].     | GCF_000308175.1 |
| WP_157822505.1 | TPR+GreAB-C+PIN*→                                   | TPR+GreAB-C+PIN           | 769  | -        | Gammaproteobacteria | <i>Psychromonas</i> sp. Urea-02u-13 | hypothetical protein, partial [Psychromonas sp. Urea-02u-13].     | GCF_002835995.1 |
| WP_157852789.1 | TPR+PIN*→                                           | TPR+PIN                   | 1134 | -        | Actinobacteria      | <i>Streptomyces iakyrus</i>         | hypothetical protein [Streptomyces iakyrus].                      | GCF_000717055.1 |
| WP_157874592.1 | REase+TPR+TPR+GreAB-C+PIN*→                         | REase+TPR+TPR+GreAB-C+PIN | 1330 | -        | Actinobacteria      | <i>Streptomyces</i> sp. AcH 505     | hypothetical protein [Streptomyces sp. AcH 505].                  | GCF_000818175.1 |
| WP_157937504.1 | TPR+GreAB-C+PIN*→                                   | TPR+GreAB-C+PIN           | 964  | -        | Gammaproteobacteria | <i>Vibrio splendidus</i>            | hypothetical protein, partial [Vibrio splendidus].                | GCF_002874795.1 |
| WP_157972098.1 | TPR+GreAB-C+PIN*→                                   | TPR+GreAB-C+PIN           | 1234 | -        | Bacteroidetes       | <i>Negadavirga</i> sp. SW125        | hypothetical protein [Negadavirga sp. SW125].                     | GCF_003347495.1 |
| WP_158764527.1 | TPR+GreAB-C+PIN*→                                   | TPR+GreAB-C+PIN           | 761  | -        | Alphaproteobacteria | <i>Terricaulis silvestris</i>       | hypothetical protein [Terricaulis silvestris].                    | GCF_009792355.1 |
| WP_158793614.1 | REase+TPR+GreAB-C+PIN*→                             | REase+TPR+GreAB-C+PIN     | 1358 | -        | Acidobacteria       | <i>Granulicella</i> sp. L60         | hypothetical protein [Granulicella sp. L60].                      | GCF_009765825.1 |
| WP_158941358.1 | REase+TPR+GreAB-C+PIN*→                             | REase+TPR+GreAB-C+PIN     | 1279 | -        | Acidobacteria       | <i>Granulicella</i> sp. S190        | hypothetical protein [Granulicella sp. S190].                     | GCF_009766095.1 |
| WP_159057317.1 | TPR+PIN*→                                           | TPR+PIN                   | 1196 | -        | Actinobacteria      | <i>Streptomyces scabiei</i>         | hypothetical protein [Streptomyces scabiei].                      | GCF_001550225.1 |
| WP_159073521.1 | TPR+PIN*→                                           | TPR+PIN                   | 1075 | -        | Actinobacteria      | <i>Streptomyces</i> sp. RTd22       | hypothetical protein [Streptomyces sp. RTd22].                    | GCF_001650215.1 |
| WP_159104186.1 | TPR+PIN*→                                           | TPR+PIN                   | 1211 | -        | Actinobacteria      | <i>Streptomyces</i> sp. CdTB01      | hypothetical protein [Streptomyces sp. CdTB01].                   | GCF_001484565.1 |
| WP_159389385.1 | REase+TPR+GreAB-C+PIN*→                             | REase+TPR+GreAB-C+PIN     | 1423 | -        | Gammaproteobacteria | <i>Pseudomonas</i> sp. R32          | hypothetical protein [Pseudomonas sp. R32].                       | GCF_009866705.1 |
| WP_159401920.1 | TPR+PIN*→                                           | TPR+PIN                   | 1075 | -        | Actinobacteria      | <i>Streptomyces hygrosopicus</i>    | hypothetical protein [Streptomyces hygrosopicus].                 | GCF_001705785.1 |
| WP_159477578.1 | Mbetalac→ Trypsin+TPR+GreAB-C+PIN*→                 | Trypsin+TPR+GreAB-C+PIN   | 1359 | -        | Bacteroidetes       | <i>Dyadobacter</i> sp. 3J3          | hypothetical protein [Dyadobacter sp. 3J3].                       | GCF_009801115.1 |
| WP_159617138.1 | PIN*→                                               | PIN                       | 499  | -        | Actinobacteria      | <i>Arthrobacter zhaoguopingii</i>   | hypothetical protein [Arthrobacter zhaoguopingii].                | GCF_009828605.1 |
| WP_159719775.1 | TPR+PIN*→                                           | TPR+PIN                   | 1170 | -        | Firmicutes          | <i>Anoxybacillus</i> sp. PDR2       | hypothetical protein [Anoxybacillus sp. PDR2].                    | GCF_009834045.1 |
| WP_159964006.1 | REase+TPR+GreAB-C+PIN*→                             | REase+TPR+GreAB-C+PIN     | 1113 | -        | Alphaproteobacteria | <i>Profundibacterium mesophilum</i> | hypothetical protein [Profundibacterium mesophilum].              | GCF_009835145.1 |
| WP_160086901.1 | BTLCP+SFI-helicase+REase→?→ REase+TPR+GreAB-C+PIN*→ | REase+TPR+GreAB-C+PIN     | 1492 | -        | Gammaproteobacteria | <i>Pseudomonas</i> sp. 9AZ          | GreA/GreB family elongation factor [Pseudomonas sp. 9AZ].         | GCF_902506525.1 |

| acc            | operon                                                    | architecture             | len  | gen.name | taxend              | species                          | define                                                                    | gca             |
|----------------|-----------------------------------------------------------|--------------------------|------|----------|---------------------|----------------------------------|---------------------------------------------------------------------------|-----------------|
| WP_160308988.1 | TPR+GreAB-C+PIN*→                                         | TPR+GreAB-C+PIN          | 1249 | -        | Deltaproteobacteria | Anaeromyxobacter sp. PSR-1       | GreA/GreB family elongation factor [Anaeromyxobacter sp. PSR-1].          | GCF_000964525.1 |
| WP_160382728.1 | REase+TPR+GreAB-C+PIN*→                                   | REase+TPR+GreAB-C+PIN    | 1329 | -        | Alphaproteobacteria | Pseudoceanicola pacificus        | hypothetical protein [Pseudoceanicola pacificus].                         | GCF_009789075.1 |
| WP_160512238.1 | HetE-N1→ TPR+GreAB-C+PIN*→                                | TPR+GreAB-C+PIN          | 1094 | -        | Gammaproteobacteria | Escherichia coli                 | hypothetical protein [Escherichia coli].                                  | GCF_009820085.1 |
| WP_160657313.1 | HetE-N1→ TPR+GreAB-C+PIN*→                                | TPR+GreAB-C+PIN          | 1114 | -        | Gammaproteobacteria | Photobacterium alginatilyticum   | hypothetical protein [Photobacterium alginatilyticum].                    | GCF_009910675.1 |
| WP_160663512.1 | TPR+PIN*→                                                 | TPR+PIN                  | 1180 | -        | Actinobacteria      | Pseudarthrobacter sp. ATCC 49987 | hypothetical protein [Pseudarthrobacter sp. ATCC 49987].                  | GCF_009928425.1 |
| WP_160778164.1 | REase→ PSE→ REase+TPR+GreAB-C+PIN*→                       | REase+TPR+GreAB-C+PIN    | 1252 | -        | Alphaproteobacteria | Parerythrobacter jejuensis       | hypothetical protein [Parerythrobacter jejuensis].                        | GCF_009827995.1 |
| WP_160856107.1 | REase+TPR+GreAB-C+PIN*→                                   | REase+TPR+GreAB-C+PIN    | 1263 | -        | Betaproteobacteria  | Delftia sp. CH05                 | hypothetical protein [Delftia sp. CH05].                                  | GCF_009827015.1 |
| WP_160933674.1 | REase+TPR+GreAB-C+PIN*→                                   | REase+TPR+GreAB-C+PIN    | 1351 | -        | Betaproteobacteria  | unclassified Burkholderia        | MULTISPECIES: hypothetical protein [unclassified Burkholderia].           | GCF_009826925.1 |
| WP_161036960.1 | REase+TPR+GreAB-C+PIN*→                                   | REase+TPR+GreAB-C+PIN    | 1075 | -        | Betaproteobacteria  | Duganella fentianensis           | hypothetical protein [Duganella fentianensis].                            | GCF_009857835.1 |
| WP_161077003.1 | REase+TPR+GreAB-C+PIN*→                                   | REase+TPR+GreAB-C+PIN    | 1292 | -        | Betaproteobacteria  | Duganella sp. CY15W              | restriction endonuclease [Duganella sp. CY15W].                           | GCF_009857555.1 |
| WP_161352699.1 | REase+TPR+GreAB-C+PIN*→                                   | REase+TPR+GreAB-C+PIN    | 1351 | -        | Alphaproteobacteria | Maritimibacter sp. DP07          | hypothetical protein [Maritimibacter sp. DP07].                           | GCF_009882975.1 |
| WP_161505253.1 | TPR+PIN*→?→?→   <-TIR                                     | TPR+PIN                  | 1268 | -        | Gammaproteobacteria | Legionella pneumophila           | hypothetical protein [Legionella pneumophila].                            | GCF_009933055.1 |
| WP_161571911.1 | HetE-N1→ TPR+GreAB-C+PIN*→                                | TPR+GreAB-C+PIN          | 1117 | -        | Gammaproteobacteria | Cronobacter malonaticus          | hypothetical protein [Cronobacter malonaticus].                           | GCF_009938405.1 |
| WP_161629377.1 | TPR+GreAB-C+PIN*→                                         | TPR+GreAB-C+PIN          | 488  | -        | Gammaproteobacteria | Marinobacter sp. EVN1            | hypothetical protein, partial [Marinobacter sp. EVN1].                    | GCF_000475375.1 |
| WP_161722347.1 | TPR+GreAB-C+PIN*→                                         | TPR+GreAB-C+PIN          | 1135 | -        | Alphaproteobacteria | unclassified Microvirga          | MULTISPECIES: tetratricopeptide repeat protein [unclassified Microvirga]. | GCF_009910725.1 |
| WP_161796830.1 | REase+TPR+GreAB-C+PIN*→                                   | REase+TPR+GreAB-C+PIN    | 1210 | -        | Alphaproteobacteria | Devosia soli                     | GreA/GreB family elongation factor [Devosia soli].                        | GCF_000970455.1 |
| WP_161897930.1 | HetE-N1→ TPR+GreAB-C+PIN*→                                | TPR+GreAB-C+PIN          | 1110 | -        | Gammaproteobacteria | Pseudomonas sp. MY50             | hypothetical protein [Pseudomonas sp. MY50].                              | GCF_009932725.1 |
| WP_161916726.1 | X+PIN*→                                                   | X+PIN                    | 1235 | -        | Actinobacteria      | Cellulomonas sp. APG4            | hypothetical protein [Cellulomonas sp. APG4].                             | GCF_009996735.1 |
| WP_161984907.1 | HTH→ HetE-N1→ HetE-N1+GreAB-C+PIN*→                       | HetE-N1+GreAB-C+PIN      | 1077 | -        | Gammaproteobacteria | Acinetobacter haemolyticus       | hypothetical protein [Acinetobacter haemolyticus].                        | GCF_010014695.1 |
| WP_162386033.1 | Mbetalac→ Trypsin+TPR+GreAB-C+PIN*→                       | Trypsin+TPR+GreAB-C+PIN  | 1366 | -        | Bacteroidetes       | Spirosoma endbachense            | hypothetical protein [Spirosoma endbachense].                             | GCF_010233585.1 |
| WP_162486659.1 | REase+TPR+GreAB-C+PIN*→   <-HTH+HTH                       | REase+TPR+GreAB-C+PIN    | 1334 | -        | Betaproteobacteria  | Burkholderia pseudomallei        | hypothetical protein [Burkholderia pseudomallei].                         | GCF_000011545.1 |
| WP_162599154.1 | HetE-N1→ TPR+GreAB-C+PIN*→                                | TPR+GreAB-C+PIN          | 1027 | -        | Gammaproteobacteria | Shewanella algidipiscicola       | hypothetical protein [Shewanella algidipiscicola].                        | GCF_900380485.1 |
| WP_162599389.1 | TPR+GreAB-C+PIN*→                                         | TPR+GreAB-C+PIN          | 1158 | -        | Gammaproteobacteria | Pseudomonas aeruginosa           | hypothetical protein [Pseudomonas aeruginosa].                            | GCF_900406905.1 |
| WP_162672520.1 | HTH→ GT4+HEPN+TPR+GreAB-C+PIN*→                           | GT4+HEPN+TPR+GreAB-C+PIN | 1685 | -        | Planctomycetes      | Gemmata massiliana               | glycosyltransferase [Gemmata massiliana].                                 | GCF_901538265.1 |
| WP_162916214.1 | PIN*→                                                     | PIN                      | 348  | -        | Betaproteobacteria  | Burkholderia sp. PAMC 26561      | hypothetical protein [Burkholderia sp. PAMC 26561].                       | GCF_001557535.2 |
| WP_162940198.1 | X+PIN*→                                                   | X+PIN                    | 1169 | -        | Actinobacteria      | Gryllotalpica protaetiae         | hypothetical protein [Gryllotalpica protaetiae].                          | GCF_003627055.1 |
| WP_162960625.1 | DOC+HTH→ REase+TOPC→?→ HetE-N1→ HetE-N1+TPR+GreAB-C+PIN*→ | HetE-N1+TPR+GreAB-C+PIN  | 770  | -        | Gammaproteobacteria | Pseudomonas aeruginosa           | hypothetical protein, partial [Pseudomonas aeruginosa].                   | GCF_003630455.1 |
| WP_163210080.1 | TM+TM+TPR+PIN*→                                           | TM+TM+TPR+PIN            | 1195 | -        | Bacteroidetes       | Bacteroides sp. 519              | hypothetical protein [Bacteroides sp. 519].                               | GCF_010500955.1 |
| WP_163325035.1 | TPR+GreAB-C+PIN*→                                         | TPR+GreAB-C+PIN          | 1227 | -        | Bacteroidetes       | Draconibacterium sp. GM2-18      | hypothetical protein [Draconibacterium sp. GM2-18].                       | GCF_010586825.1 |
| WP_163385713.1 | TPR+GreAB-C+PIN*→                                         | TPR+GreAB-C+PIN          | 509  | -        | Gammaproteobacteria | Enterobacter hormaechei          | hypothetical protein, partial [Enterobacter hormaechei].                  | GCF_011006815.1 |
| WP_163511264.1 | REase+TPR+GreAB-C+PIN*→                                   | REase+TPR+GreAB-C+PIN    | 1231 | -        | Actinobacteria      | Fodinicola acaciae               | DUF4365 domain-containing protein [Fodinicola acaciae].                   | GCF_010993745.1 |
| WP_163806192.1 | TPR+PIN*→                                                 | TPR+PIN                  | 1223 | -        | Actinobacteria      | Mycolicibacterium anyangense     | hypothetical protein [Mycolicibacterium anyangense].                      | GCF_010731855.1 |
| WP_163887020.1 | REase+TPR+GreAB-C+PIN*→                                   | REase+TPR+GreAB-C+PIN    | 1290 | -        | Alphaproteobacteria | Pseudoruegeria sp. M32A2M        | tetratricopeptide repeat protein [Pseudoruegeria sp. M32A2M].             | GCF_010374725.1 |
| WP_164141894.1 | TPR+PIN*→                                                 | TPR+PIN                  | 1215 | -        | Actinobacteria      | Streptomyces coelicoflavus       | hypothetical protein [Streptomyces coelicoflavus].                        | GCF_010548435.1 |
| WP_164363703.1 | TPR+PIN*→                                                 | TPR+PIN                  | 1135 | -        | Actinobacteria      | Streptomyces griseus             | hypothetical protein [Streptomyces griseus].                              | GCF_010548565.1 |
| WP_164366948.1 | TPR+PIN*→                                                 | TPR+PIN                  | 1215 | -        | Actinobacteria      | Streptomyces diastaticus         | hypothetical protein [Streptomyces diastaticus].                          | GCF_010548605.1 |
| WP_164922417.1 | TRD+TRD→?→?→ REase+SNF2→?→ TPR+GreAB-C+PIN*→              | TPR+GreAB-C+PIN          | 1273 | -        | Planctomycetes      | Rhodopirellula baltica           | hypothetical protein [Rhodopirellula baltica].                            | GCF_000196115.1 |
| WP_165069081.1 | TPR+PIN*→                                                 | TPR+PIN                  | 1123 | -        | Actinobacteria      | Marisediminicola senii           | hypothetical protein [Marisediminicola senii].                            | GCF_011057645.1 |
| WP_165087560.1 | REase+TPR+GreAB-C+PIN*→                                   | REase+TPR+GreAB-C+PIN    | 1326 | -        | Betaproteobacteria  | Caballeronia sp. SBC2            | hypothetical protein [Caballeronia sp. SBC2].                             | GCF_011039955.1 |

| acc            | operon                                                       | architecture              | len  | gen.name | taxend              | species                                   | define                                                               | gca             |
|----------------|--------------------------------------------------------------|---------------------------|------|----------|---------------------|-------------------------------------------|----------------------------------------------------------------------|-----------------|
| WP_165198604.1 | TPR+GreAB-C+PIN*→                                            | TPR+GreAB-C+PIN           | 1240 | -        | Alphaproteobacteria | Pseudohalocynthiibacter aestuariivivens   | hypothetical protein [Pseudohalocynthiibacter aestuariivivens].      | GCF_011040495.1 |
| WP_165399219.1 | REase+TPR+GreAB-C+PIN*→                                      | REase+TPR+GreAB-C+PIN     | 1316 | -        | Alphaproteobacteria | Komagataeibacter xylinus                  | GreA/GreB family elongation factor [Komagataeibacter xylinus].       | GCF_004302915.1 |
| WP_165684855.1 | TPR+PIN*→                                                    | TPR+PIN                   | 1088 | -        | Actinobacteria      | Streptomyces sp. KO7888                   | hypothetical protein [Streptomyces sp. KO7888].                      | GCF_011317205.1 |
| WP_165714007.1 | TPR+GreAB-C+PIN*→                                            | TPR+GreAB-C+PIN           | 924  | -        | Betaproteobacteria  | Rubrivivax benzoatilyticus                | hypothetical protein, partial [Rubrivivax benzoatilyticus].          | GCF_011365705.1 |
| WP_165715394.1 | HetE-N1→?→?→ TPR+GreAB-C+PIN*→                               | TPR+GreAB-C+PIN           | 776  | -        | Gammaproteobacteria | Salmonella enterica                       | hypothetical protein [Salmonella enterica].                          | GCF_011368495.1 |
| WP_165722314.1 | HetE-N1→ TPR+GreAB-C+PIN*→                                   | TPR+GreAB-C+PIN           | 1113 | -        | Gammaproteobacteria | unclassified Pseudoalteromonas            | MULTISPECIES: hypothetical protein [unclassified Pseudoalteromonas]. | GCF_011378665.1 |
| WP_165919434.1 | REase+TPR+GreAB-C+PIN*→ TPR→                                 | REase+TPR+GreAB-C+PIN     | 1252 | -        | Actinobacteria      | Promicromonospora sp. CF082               | DUF4365 domain-containing protein [Promicromonospora sp. CF082].     | GCF_004341335.1 |
| WP_166221458.1 | HTH→ HetE-N1→ TPR+GreAB-C+PIN*→                              | TPR+GreAB-C+PIN           | 1076 | -        | Gammaproteobacteria | Acinetobacter shaoyimingii                | hypothetical protein [Acinetobacter shaoyimingii].                   | GCF_011578045.1 |
| WP_166315930.1 | X+PIN*→                                                      | X+PIN                     | 1081 | -        | Actinobacteria      | Microbacterium excoecariae                | hypothetical protein [Microbacterium excoecariae].                   | GCF_011326725.1 |
| WP_166694175.1 | Mbetalac→ Trypsin+TPR+GreAB-C+PIN*→                          | Trypsin+TPR+GreAB-C+PIN   | 1365 | -        | Bacteroidetes       | Fibrella aestuarina                       | trypsin-like serine protease [Fibrella aestuarina].                  | GCF_011742925.1 |
| WP_166748348.1 | REase+TPR+GreAB-C+PIN*→                                      | REase+TPR+GreAB-C+PIN     | 1323 | -        | Alphaproteobacteria | Sphingomonas aerolata                     | hypothetical protein [Sphingomonas aerolata].                        | GCF_011759485.1 |
| WP_166760128.1 | X+PIN*→                                                      | X+PIN                     | 1124 | -        | Actinobacteria      | Frigoribacterium faeni                    | hypothetical protein [Frigoribacterium faeni].                       | GCF_011761235.1 |
| WP_166908249.1 | TPR+PIN*→                                                    | TPR+PIN                   | 1129 | -        | Actinobacteria      | Mycobacterium sp. DL440                   | hypothetical protein [Mycobacterium sp. DL440].                      | GCF_011745145.1 |
| WP_167081447.1 | REase+TPR+GreAB-C+PIN*→                                      | REase+TPR+GreAB-C+PIN     | 1510 | -        | Betaproteobacteria  | 'Massilia aquatica' Holochova et al. 2020 | hypothetical protein ['Massilia aquatica' Holochova et al. 2020].    | GCF_011682045.1 |
| WP_167302996.1 | REase+TPR+GreAB-C+PIN*→                                      | REase+TPR+GreAB-C+PIN     | 1316 | -        | Alphaproteobacteria | Sphingobium vermicomposti                 | hypothetical protein [Sphingobium vermicomposti].                    | GCF_011762025.1 |
| WP_167344464.1 | TPR+PIN*→   <-NUDIX                                          | TPR+PIN                   | 1134 | -        | Actinobacteria      | Streptomyces griseolus                    | hypothetical protein [Streptomyces griseolus].                       | GCF_000721185.1 |
| WP_167432534.1 | HetE-N1→ TPR+GreAB-C+PIN*→                                   | TPR+GreAB-C+PIN           | 1111 | -        | Gammaproteobacteria | Pantoea                                   | MULTISPECIES: hypothetical protein [Pantoea].                        | GCF_011800365.1 |
| WP_168003144.1 | TM+TPR+PIN*→                                                 | TM+TPR+PIN                | 1126 | -        | Actinobacteria      | Micromonospora sp. HSS6-12                | hypothetical protein, partial [Micromonospora sp. HSS6-12].          | GCF_012034245.1 |
| WP_168341898.1 | REase+TPR+TPR+GreAB-C+PIN*→                                  | REase+TPR+TPR+GreAB-C+PIN | 1233 | -        | Alphaproteobacteria | Rhizobium leguminosarum                   | hypothetical protein [Rhizobium leguminosarum].                      | GCF_012276075.1 |
| WP_168426515.1 | TPR+GreAB-C+PIN*→                                            | TPR+GreAB-C+PIN           | 461  | -        | Gammaproteobacteria | Pseudomonas sp. SST3                      | hypothetical protein, partial [Pseudomonas sp. SST3].                | GCF_003325755.1 |
| WP_168560628.1 | REase+TPR+GreAB-C+PIN*→                                      | REase+TPR+GreAB-C+PIN     | 1337 | -        | Betaproteobacteria  | Rhizobacter sp. SG703                     | hypothetical protein [Rhizobacter sp. SG703].                        | GCF_012275445.1 |
| WP_168617642.1 | TPR+PIN*→                                                    | TPR+PIN                   | 1210 | -        | Actinobacteria      | Nocardioides sp. JQ2195                   | hypothetical protein [Nocardioides sp. JQ2195].                      | GCF_012272695.1 |
| WP_168725201.1 | TPR+PIN*→                                                    | TPR+PIN                   | 1218 | -        | Actinobacteria      | Streptomyces galbus                       | hypothetical protein [Streptomyces galbus].                          | GCF_014650535.1 |
| WP_168927382.1 | TPR+GreAB-C+PIN*→                                            | TPR+GreAB-C+PIN           | 546  | -        | Gammaproteobacteria | Enterobacter hormaechei                   | hypothetical protein, partial [Enterobacter hormaechei].             | GCF_902166805.1 |
| WP_169321903.1 | TPR+GreAB-C+PIN*→                                            | TPR+GreAB-C+PIN           | 1137 | -        | Bacteroidetes       | Chryseobacterium                          | MULTISPECIES: hypothetical protein [Chryseobacterium].               | GCF_012952015.1 |
| WP_169448013.1 | REase+TPR+GreAB-C+PIN*→                                      | REase+TPR+GreAB-C+PIN     | 1243 | -        | Gammaproteobacteria | Stenotrophomonas maltophilia              | hypothetical protein [Stenotrophomonas maltophilia].                 | GCF_012971765.1 |
| WP_169574578.1 | REase+TPR+GreAB-C+PIN→ TPR+GreAB-C+PIN*→                     | TPR+GreAB-C+PIN           | 628  | -        | Alphaproteobacteria | Sphingobium psychrophilum                 | hypothetical protein [Sphingobium psychrophilum].                    | GCF_012927105.1 |
| WP_169902587.1 | REase+TPR+GreAB-C+PIN*→                                      | REase+TPR+GreAB-C+PIN     | 1321 | -        | Gammaproteobacteria | Pseudomonas rhodesiae                     | DUF4365 domain-containing protein [Pseudomonas rhodesiae].           | GCF_012985855.1 |
| WP_169912953.1 | TPR+GreAB-C+PIN*→                                            | TPR+GreAB-C+PIN           | 1140 | -        | Gammaproteobacteria | Pseudomonas chlororaphis                  | hypothetical protein [Pseudomonas chlororaphis].                     | GCF_012986925.1 |
| WP_169922112.1 | TPR+GreAB-C+PIN*→                                            | TPR+GreAB-C+PIN           | 1148 | -        | Gammaproteobacteria | Pseudomonas sp. WS 5503                   | hypothetical protein [Pseudomonas sp. WS 5503].                      | GCF_012985385.1 |
| WP_170029824.1 | REase+TPR+GreAB-C+PIN*→                                      | REase+TPR+GreAB-C+PIN     | 1470 | -        | Gammaproteobacteria | Pseudomonas sp. SK                        | hypothetical protein [Pseudomonas sp. SK].                           | GCF_012975065.1 |
| WP_170117623.1 | HNH+TPR+GreAB-C+PIN*→                                        | HNH+TPR+GreAB-C+PIN       | 1207 | -        | Bacteroidetes       | Chitinophaga ginsengisoli                 | hypothetical protein [Chitinophaga ginsengisoli].                    | GCF_003014595.1 |
| WP_170323822.1 | REase+TPR+GreAB-C+PIN*→                                      | REase+TPR+GreAB-C+PIN     | 1251 | -        | Actinobacteria      | Cryptosporangium phraense                 | DUF4365 domain-containing protein [Cryptosporangium phraense].       | GCF_006912135.1 |
| WP_170431548.1 | REase+TPR+GreAB-C+PIN*→?→   <-?<-?<-BTLCF+SFI-helicase+REase | REase+TPR+GreAB-C+PIN     | 1310 | -        | Alphaproteobacteria | Ruegeria arenilitoris                     | tetratricopeptide repeat protein [Ruegeria arenilitoris].            | GCF_013032225.1 |
| WP_171027511.1 | TPR+PIN*→                                                    | TPR+PIN                   | 973  | -        | Actinobacteria      | Pseudarthrobacter sp. NamE2               | tetratricopeptide repeat protein [Pseudarthrobacter sp. NamE2].      | GCF_005796205.1 |

| acc            | operon                                                               | architecture              | len  | gen.name | taxend              | species                      | define                                                                 | gca             |
|----------------|----------------------------------------------------------------------|---------------------------|------|----------|---------------------|------------------------------|------------------------------------------------------------------------|-----------------|
| WP_171071268.1 | REase+TPR+GreAB-C+PIN*→                                              | REase+TPR+GreAB-C+PIN     | 1155 | -        | Gammaproteobacteria | Acinetobacter baumannii      | GreA/GreB family elongation factor, partial [Acinetobacter baumannii]. | GCF_000580875.1 |
| WP_171275163.1 | HetE-N1→ TPR+GreAB-C+PIN*→                                           | TPR+GreAB-C+PIN           | 1094 | -        | Gammaproteobacteria | Aeromonas media              | hypothetical protein [Aeromonas media].                                | GCF_013085485.1 |
| WP_171434497.1 | DOC+HTH→ REase+TOPC→?→ HetE-N1+TPR+GreAB-C+PIN*→                     | HetE-N1+TPR+GreAB-C+PIN   | 1124 | -        | Gammaproteobacteria | Pseudomonas aeruginosa       | hypothetical protein [Pseudomonas aeruginosa].                         | GCF_013115755.1 |
| WP_171451709.1 | DOC+HTH→ REase+TOPC→?→ HetE-N1→ HetE-N1→ GreAB-C+PIN*→               | GreAB-C+PIN               | 523  | -        | Gammaproteobacteria | Pseudomonas aeruginosa       | hypothetical protein [Pseudomonas aeruginosa].                         | GCF_013115805.1 |
| WP_171477953.1 | TPR+GreAB-C+PIN*→   <-?  HTH→                                        | TPR+GreAB-C+PIN           | 652  | -        | Gammaproteobacteria | Acinetobacter baumannii      | GreA/GreB family elongation factor, partial [Acinetobacter baumannii]. | GCF_006491975.1 |
| WP_171493638.1 | TPR+GreAB-C+PIN*→                                                    | TPR+GreAB-C+PIN           | 816  | -        | Gammaproteobacteria | Acinetobacter soli           | hypothetical protein, partial [Acinetobacter soli].                    | GCF_008987205.1 |
| WP_171564538.1 | TPR+PIN*→                                                            | TPR+PIN                   | 1172 | -        | Firmicutes          | Brevibacillus sp. MCWH       | hypothetical protein [Brevibacillus sp. MCWH].                         | GCF_018195675.1 |
| WP_171662370.1 | REase+TPR+GreAB-C+PIN*→                                              | REase+TPR+GreAB-C+PIN     | 1496 | -        | Betaproteobacteria  | Achromobacter deleyi         | hypothetical protein [Achromobacter deleyi].                           | GCF_013116765.1 |
| WP_171694982.1 | HetE-N1→ TPR+GreAB-C+PIN*→                                           | TPR+GreAB-C+PIN           | 1120 | -        | Gammaproteobacteria | Methylomonas sp. ZR1         | hypothetical protein [Methylomonas sp. ZR1].                           | GCF_013141865.1 |
| WP_171798091.1 | REase+TPR+GreAB-C+PIN*→                                              | REase+TPR+GreAB-C+PIN     | 1323 | -        | Alphaproteobacteria | unclassified Novosphingobium | MULTISPECIES: hypothetical protein [unclassified Novosphingobium].     | GCF_013149315.1 |
| WP_172598885.1 | TPR+GreAB-C+PIN*→                                                    | TPR+GreAB-C+PIN           | 709  | -        | Alphaproteobacteria | Sphingobium sp. YG1          | hypothetical protein [Sphingobium sp. YG1].                            | GCF_003609795.1 |
| WP_172685391.1 | REase+TPR+GreAB-C+PIN*→?→?→ Calcineurin→ Calcineurin→?→ Calcineurin→ | REase+TPR+GreAB-C+PIN     | 1311 | -        | Alphaproteobacteria | Methylobacterium oryzae      | hypothetical protein [Methylobacterium oryzae].                        | -               |
| WP_172806748.1 | TPR+GreAB-C+PIN*→                                                    | TPR+GreAB-C+PIN           | 766  | -        | Gammaproteobacteria | Endozoicomonas arenosclerae  | hypothetical protein [Endozoicomonas arenosclerae].                    | GCF_001562015.1 |
| WP_172870236.1 | TPR+GreAB-C*→                                                        | TPR+GreAB-C               | 233  | -        | Firmicutes          | Bacillus velezensis          | hypothetical protein, partial [Bacillus velezensis].                   | GCF_013267055.1 |
| WP_172883554.1 | TPR+GreAB-C+PIN*→                                                    | TPR+GreAB-C+PIN           | 1159 | -        | Gammaproteobacteria | Pseudomonas stutzeri         | hypothetical protein [Pseudomonas stutzeri].                           | GCF_013267085.1 |
| WP_173054693.1 | TM+TPR+PIN*→ REase→                                                  | TM+TPR+PIN                | 1322 | -        | Actinobacteria      | Phytohabitans houttuyniae    | hypothetical protein [Phytohabitans houttuyniae].                      | GCF_011764425.1 |
| WP_173520689.1 | REase+TPR+TPR+GreAB-C+PIN*→                                          | REase+TPR+TPR+GreAB-C+PIN | 1357 | -        | Alphaproteobacteria | Ensifer sesbaniae            | hypothetical protein [Ensifer sesbaniae].                              | GCF_013283665.1 |
| WP_173522752.1 | REase+TPR+GreAB-C+PIN*→                                              | REase+TPR+GreAB-C+PIN     | 1313 | -        | Actinobacteria      | Nonomurea sp. NN258          | hypothetical protein [Nonomurea sp. NN258].                            | GCF_013283785.1 |
| WP_173794050.1 | NACHT→ X+PIN*→ HTH→?→?→ HTH→                                         | X+PIN                     | 1179 | -        | Firmicutes          | Dorea formicigenerans        | hypothetical protein [Dorea formicigenerans].                          | GCF_013301385.1 |
| WP_173821757.1 | X+PIN*→ HTH→?→?→ HTH→                                                | X+PIN                     | 1178 | -        | Firmicutes          | Dorea formicigenerans        | hypothetical protein [Dorea formicigenerans].                          | GCF_013301365.1 |
| WP_173853982.1 | TPR+GreAB-C+PIN→ PIN*→                                               | PIN                       | 248  | -        | Bacteroidetes       | Flavobacterium sp. 28A       | hypothetical protein [Flavobacterium sp. 28A].                         | GCF_013294005.1 |
| WP_173968533.1 | GreAB-C+PIN*→                                                        | GreAB-C+PIN               | 552  | -        | Bacteroidetes       | Flavobacterium collinsii     | hypothetical protein, partial [Flavobacterium collinsii].              | GCF_902804485.1 |
| WP_173994169.1 | TPR+GreAB-C+PIN*→                                                    | TPR+GreAB-C+PIN           | 1181 | -        | Alphaproteobacteria | Agrobacterium fabrum         | hypothetical protein [Agrobacterium fabrum].                           | GCF_013318355.1 |
| WP_174011044.1 | HEPN→ REase+TPR+TPR+GreAB-C+PIN*→                                    | REase+TPR+TPR+GreAB-C+PIN | 1333 | -        | Alphaproteobacteria | Agrobacterium rhizogenes     | GreA/GreB family elongation factor [Agrobacterium rhizogenes].         | GCF_013321105.1 |
| WP_174166670.1 | BirA-HTH→ HEPN→ REase+TPR+TPR+GreAB-C+PIN*→                          | REase+TPR+TPR+GreAB-C+PIN | 1341 | -        | Alphaproteobacteria | Agrobacterium rhizogenes     | hypothetical protein [Agrobacterium rhizogenes].                       | GCF_013322015.1 |
| WP_174168420.1 | BirA-HTH→ HEPN→ REase+TPR+TPR+GreAB-C+PIN*→                          | REase+TPR+TPR+GreAB-C+PIN | 1333 | -        | Alphaproteobacteria | Agrobacterium rhizogenes     | GreA/GreB family elongation factor [Agrobacterium rhizogenes].         | GCF_013321875.1 |
| WP_174361404.1 | HetE-N1→?→ TPR+GreAB-C+PIN*→                                         | TPR+GreAB-C+PIN           | 512  | -        | Gammaproteobacteria | Citrobacter gillenii         | hypothetical protein [Citrobacter gillenii].                           | GCF_013337685.1 |
| WP_175386063.1 | PIN*→                                                                | PIN                       | 434  | -        | Gammaproteobacteria | Pseudomonas corrugata        | hypothetical protein [Pseudomonas corrugata].                          | GCF_013359545.1 |
| WP_175666066.1 | REase+TPR+GreAB-C+PIN*→                                              | REase+TPR+GreAB-C+PIN     | 1351 | -        | Betaproteobacteria  | Burkholderia ambifaria       | hypothetical protein [Burkholderia ambifaria].                         | GCF_902829825.1 |
| WP_175722904.1 | REase+TPR+GreAB-C+PIN*→                                              | REase+TPR+GreAB-C+PIN     | 1351 | -        | Betaproteobacteria  | Burkholderia ambifaria       | hypothetical protein [Burkholderia ambifaria].                         | GCF_902829925.1 |
| WP_175818825.1 | REase+TPR+GreAB-C+PIN*→                                              | REase+TPR+GreAB-C+PIN     | 1335 | -        | Betaproteobacteria  | Burkholderia sp. BCC0419     | hypothetical protein [Burkholderia sp. BCC0419].                       | GCF_902830285.1 |
| WP_175896466.1 | TPR+GreAB-C+PIN*→   <-HTH+HTH                                        | TPR+GreAB-C+PIN           | 872  | -        | Betaproteobacteria  | Burkholderia cepacia         | hypothetical protein [Burkholderia cepacia].                           | GCF_902830675.1 |
| WP_176170943.1 | REase+TPR+GreAB-C+PIN*→                                              | REase+TPR+GreAB-C+PIN     | 1244 | -        | Actinobacteria      | Amycolatopsis sp. Hca4       | DUF4365 domain-containing protein [Amycolatopsis sp. Hca4].            | GCF_013364075.1 |
| WP_176203105.1 | TPR+GreAB-C+PIN*→                                                    | TPR+GreAB-C+PIN           | 681  | -        | Gammaproteobacteria | Salmonella enterica          | hypothetical protein, partial [Salmonella enterica].                   | GCF_002044735.1 |
| WP_176308009.1 | REase+TPR+GreAB-C+PIN*→                                              | REase+TPR+GreAB-C+PIN     | 1351 | -        | Betaproteobacteria  | Burkholderia ambifaria       | hypothetical protein [Burkholderia ambifaria].                         | GCF_902830205.1 |
| WP_176329154.1 | REase+TPR+GreAB-C+PIN*→                                              | REase+TPR+GreAB-C+PIN     | 1335 | -        | Betaproteobacteria  | Burkholderia vietnamiensis   | hypothetical protein [Burkholderia vietnamiensis].                     | GCF_902833435.1 |
| WP_176389972.1 | REase+TPR+GreAB-C+PIN*→                                              | REase+TPR+GreAB-C+PIN     | 1374 | -        | Betaproteobacteria  | Janthinobacterium sp. BJB401 | hypothetical protein [Janthinobacterium sp. BJB401].                   | GCF_013372745.1 |
| WP_176422167.1 | REase+TPR+TPR+GreAB-C+PIN*→                                          | REase+TPR+TPR+GreAB-C+PIN | 1325 | -        | Alphaproteobacteria | Bradyrhizobium sp. 2S1       | hypothetical protein [Bradyrhizobium sp. 2S1].                         | GCF_011516625.2 |
| WP_176457673.1 | REase+TPR+GreAB-C+PIN*→                                              | REase+TPR+GreAB-C+PIN     | 1516 | -        | Gammaproteobacteria | Pseudomonas mandelii         | hypothetical protein [Pseudomonas mandelii].                           | GCF_000257545.3 |
| WP_176459502.1 | REase+TPR+GreAB-C+PIN*→?→ Trypsin→                                   | REase+TPR+GreAB-C+PIN     | 1228 | -        | Actinobacteria      | Rhodococcus sp. OK302        | DUF4365 domain-containing protein [Rhodococcus sp. OK302].             | GCF_002245895.1 |
| WP_176508867.1 | REase+TPR+GreAB-C+PIN*→                                              | REase+TPR+GreAB-C+PIN     | 1548 | -        | Gammaproteobacteria | Pseudomonas sp. BML-PP042    | hypothetical protein [Pseudomonas sp. BML-PP042].                      | GCF_013373915.1 |

| acc            | operon                                                    | architecture              | len  | gen.name | taxend              | species                                | define                                                              | gca             |
|----------------|-----------------------------------------------------------|---------------------------|------|----------|---------------------|----------------------------------------|---------------------------------------------------------------------|-----------------|
| WP_177062188.1 | REase+TPR+GreAB-C+PIN*→                                   | REase+TPR+GreAB-C+PIN     | 1424 | -        | Gammaproteobacteria | <i>Pseudomonas reactans</i>            | hypothetical protein [Pseudomonas reactans].                        | GCF_013386305.1 |
| WP_177327801.1 | REase+TPR+GreAB-C+PIN*→                                   | REase+TPR+GreAB-C+PIN     | 1404 | -        | Gammaproteobacteria | <i>Pseudomonas</i> sp. 5               | GreA/GreB family elongation factor [Pseudomonas sp. 5].             | GCF_000955815.1 |
| WP_179038946.1 | REase+TPR+TPR+GreAB-C+PIN*→                               | REase+TPR+TPR+GreAB-C+PIN | 1350 | -        | Alphaproteobacteria | <i>Rhizobium leguminosarum</i>         | hypothetical protein [Rhizobium leguminosarum].                     | GCF_013391705.1 |
| WP_179093684.1 | TPR+GreAB-C+PIN*→   <-HTH+HTH                             | TPR+GreAB-C+PIN           | 872  | -        | Betaproteobacteria  | <i>Burkholderia pseudomallei</i>       | hypothetical protein [Burkholderia pseudomallei].                   | GCF_002880985.1 |
| WP_179103158.1 | TPR+GreAB-C+PIN*→   <-HTH+HTH                             | TPR+GreAB-C+PIN           | 872  | -        | Betaproteobacteria  | <i>Burkholderia pseudomallei</i>       | hypothetical protein [Burkholderia pseudomallei].                   | GCF_001981185.1 |
| WP_179448733.1 | -                                                         | -                         | 914  | -        | Gammaproteobacteria | <i>Pseudomonas yamanorum</i>           | hypothetical protein [Pseudomonas yamanorum].                       | GCF_013403585.1 |
| WP_179622762.1 | DOC+HTH→ REase+TOPC→?→ HetE-N1→ HetE-N1+TPR+GreAB-C+PIN*→ | HetE-N1+TPR+GreAB-C+PIN   | 1124 | -        | Gammaproteobacteria | <i>Pseudomonas mendocina</i>           | hypothetical protein [Pseudomonas mendocina].                       | GCF_013410555.1 |
| WP_179654574.1 | REase+TPR+TPR+GreAB-C+PIN*→ REase→                        | REase+TPR+TPR+GreAB-C+PIN | 1329 | -        | Alphaproteobacteria | <i>Mesorhizobium</i> sp. YL-MPnR-2016  | hypothetical protein [Mesorhizobium sp. YL-MPnR-2016].              | GCF_013408905.1 |
| WP_179833445.1 | REase+TPR+PIN*→                                           | REase+TPR+PIN             | 1241 | -        | Actinobacteria      | <i>Actinomadura citrea</i>             | DUF4365 domain-containing protein [Actinomadura citrea].            | GCF_014648455.1 |
| WP_179902819.1 | HetE-N1→ TPR+GreAB-C+PIN*→                                | TPR+GreAB-C+PIN           | 1094 | -        | Gammaproteobacteria | <i>Aeromonas veronii</i>               | hypothetical protein [Aeromonas veronii].                           | GCF_013415825.1 |
| WP_180191279.1 | HTH→ HetE-N1→ HetE-N1+GreAB-C+PIN*→                       | HetE-N1+GreAB-C+PIN       | 1077 | -        | Gammaproteobacteria | <i>Acinetobacter</i> sp. YH01006       | hypothetical protein [Acinetobacter sp. YH01006].                   | GCF_013420445.1 |
| WP_180269129.1 | TPR+GreAB-C+PIN*→                                         | TPR+GreAB-C+PIN           | 1231 | -        | Bacteroidetes       | <i>Sphingobacterium</i> sp. 1.A.5      | tetratricopeptide repeat protein [Sphingobacterium sp. 1.A.5].      | GCF_002734235.1 |
| WP_180491971.1 | HetE-N1→ TPR+GreAB-C+PIN*→                                | TPR+GreAB-C+PIN           | 1106 | -        | Gammaproteobacteria | <i>Escherichia fergusonii</i>          | hypothetical protein [Escherichia fergusonii].                      | GCF_903932165.1 |
| WP_180778225.1 | HetE-N1→ TPR+GreAB-C+PIN*→                                | TPR+GreAB-C+PIN           | 1117 | -        | Gammaproteobacteria | <i>Pectobacterium aroidearum</i>       | hypothetical protein [Pectobacterium aroidearum].                   | GCF_013449715.1 |
| WP_180799798.1 | TPR+GreAB-C+PIN*→                                         | TPR+GreAB-C+PIN           | 796  | -        | Gammaproteobacteria | <i>Vibrio parahaemolyticus</i>         | hypothetical protein, partial [Vibrio parahaemolyticus].            | GCF_006371865.1 |
| WP_180830729.1 | TPR+GreAB-C+PIN*→                                         | TPR+GreAB-C+PIN           | 764  | -        | Gammaproteobacteria | <i>Vibrio parahaemolyticus</i>         | hypothetical protein, partial [Vibrio parahaemolyticus].            | GCF_006375165.1 |
| WP_180977515.1 | TPR+GreAB-C+PIN*→                                         | TPR+GreAB-C+PIN           | 1154 | -        | Betaproteobacteria  | <i>Janthinobacterium</i> sp. ROICE36   | hypothetical protein, partial [Janthinobacterium sp. ROICE36].      | GCF_002869965.1 |
| WP_181464939.1 | TPR+GreAB-C+PIN*→                                         | TPR+GreAB-C+PIN           | 762  | -        | Betaproteobacteria  | <i>Herbaspirillum rubrisubalbicans</i> | tetratricopeptide repeat protein [Herbaspirillum rubrisubalbicans]. | GCF_003263475.1 |
| WP_181641518.1 | TPR+PIN*→                                                 | TPR+PIN                   | 1210 | -        | Actinobacteria      | <i>Nocardioides massiliensis</i>       | hypothetical protein [Nocardioides massiliensis].                   | GCF_900067705.2 |
| WP_181834083.1 | TPR+GreAB-C+PIN*→                                         | TPR+GreAB-C+PIN           | 678  | -        | Alphaproteobacteria | <i>Brucella anthropi</i>               | hypothetical protein, partial [Brucella anthropi].                  | GCF_003325675.1 |
| WP_182064218.1 | TPR+PIN*→                                                 | TPR+PIN                   | 1177 | -        | Actinobacteria      | <i>Curtobacterium</i> sp. ME12         | hypothetical protein [Curtobacterium sp. ME12].                     | GCF_903970855.1 |
| WP_182166026.1 | REase+TPR+GreAB-C+PIN*→   <-HTH                           | REase+TPR+GreAB-C+PIN     | 1304 | -        | Betaproteobacteria  | <i>Duganella</i> sp. LX20W             | hypothetical protein [Duganella sp. LX20W].                         | GCF_014042345.1 |
| WP_182270399.1 | HetE-N1→ TPR+GreAB-C+PIN*→                                | TPR+GreAB-C+PIN           | 1092 | -        | Gammaproteobacteria | <i>Citrobacter freundii</i>            | hypothetical protein [Citrobacter freundii].                        | GCF_014101305.1 |
| WP_182650750.1 | GreAB-C+PIN*→                                             | GreAB-C+PIN               | 566  | -        | Bacteroidetes       | <i>Flavobacterium</i> sp. SOK18b       | hypothetical protein, partial [Flavobacterium sp. SOK18b].          | GCF_014156605.1 |
| WP_182869571.1 | PIN*→                                                     | PIN                       | 188  | -        | Alphaproteobacteria | <i>Bradyrhizobium diazoefficiens</i>   | hypothetical protein [Bradyrhizobium diazoefficiens].               | GCF_014163475.1 |
| WP_182925384.1 | REase+TPR+GreAB-C+PIN*→   <-?  HTH→                       | REase+TPR+GreAB-C+PIN     | 1250 | -        | Gammaproteobacteria | <i>Acinetobacter baumannii</i>         | GreA/GreB family elongation factor [Acinetobacter baumannii].       | GCF_014169655.1 |
| WP_183061688.1 | CARF+PIN*→                                                | CARF+PIN                  | 1208 | -        | Actinobacteria      | <i>Motilobacter peucedani</i>          | hypothetical protein [Motilobacter peucedani].                      | GCF_003634695.1 |
| WP_183296812.1 | REase+TPR+GreAB-C+PIN*→                                   | REase+TPR+GreAB-C+PIN     | 1234 | -        | Actinobacteria      | <i>Cellulomonas cellasea</i>           | DUF4365 domain-containing protein [Cellulomonas cellasea].          | GCF_014190965.1 |
| WP_183420610.1 | REase+TPR+GreAB-C+PIN*→                                   | REase+TPR+GreAB-C+PIN     | 1219 | -        | Actinobacteria      | <i>Microbacterium proteolyticum</i>    | DUF4365 domain-containing protein [Microbacterium proteolyticum].   | GCF_014192415.1 |
| WP_183438886.1 | TPR+GreAB-C+PIN*→                                         | TPR+GreAB-C+PIN           | 1161 | -        | Alphaproteobacteria | <i>Methylobacterium</i> sp. R2-1       | hypothetical protein [Methylobacterium sp. R2-1].                   | GCF_014191355.1 |
| WP_183694785.1 | REase+TPR+TPR+GreAB-C+PIN*→                               | REase+TPR+TPR+GreAB-C+PIN | 1363 | -        | Alphaproteobacteria | <i>Rhizobium lusitanum</i>             | restriction endonuclease [Rhizobium lusitanum].                     | GCF_014189535.1 |
| WP_183714092.1 | TIR→?→ TPR+GreAB-C+PIN*→                                  | TPR+GreAB-C+PIN           | 1131 | -        | Alphaproteobacteria | <i>Bradyrhizobium</i> sp. ERR14        | hypothetical protein [Bradyrhizobium sp. ERR14].                    | GCF_014198235.1 |
| WP_183806882.1 | REase+TPR+TPR+GreAB-C+PIN*→                               | REase+TPR+TPR+GreAB-C+PIN | 1345 | -        | Alphaproteobacteria | <i>Rhizobium azooxidifex</i>           | tetratricopeptide repeat protein [Rhizobium azooxidifex].           | GCF_014196765.1 |
| WP_183919890.1 | REase+TPR+GreAB-C+PIN*→                                   | REase+TPR+GreAB-C+PIN     | 1290 | -        | Alphaproteobacteria | <i>Rhizobium lentis</i>                | hypothetical protein [Rhizobium lentis].                            | GCF_014200135.1 |
| WP_183998882.1 | REase+TPR+GreAB-C+PIN*→                                   | REase+TPR+GreAB-C+PIN     | 1313 | -        | Alphaproteobacteria | <i>Sphingomonas kyeonggiensis</i>      | hypothetical protein [Sphingomonas kyeonggiensis].                  | GCF_014196745.1 |
| WP_184249301.1 | REase+TPR+GreAB-C+PIN*→                                   | REase+TPR+GreAB-C+PIN     | 1318 | -        | Betaproteobacteria  | <i>Paraburkholderia atlantica</i>      | DUF4365 domain-containing protein [Paraburkholderia atlantica].     | GCF_014200895.1 |

| acc            | operon                                                                                | architecture               | len  | gen.name | taxend              | species                       | define                                                                         | gca             |
|----------------|---------------------------------------------------------------------------------------|----------------------------|------|----------|---------------------|-------------------------------|--------------------------------------------------------------------------------|-----------------|
| WP_184301652.1 | REase+TPR+GreAB-C+PIN*→?→?→ URI+RAMA→                                                 | REase+TPR+GreAB-C+PIN      | 1255 | -        | Planctomycetes      | Rhodopirellula rubra          | hypothetical protein [Rhodopirellula rubra].                                   | GCF_014192335.1 |
| WP_184659486.1 | TPR+GreAB-C+PIN*→                                                                     | TPR+GreAB-C+PIN            | 1265 | -        | Bacteroidetes       | Pedobacter cryoconitis        | hypothetical protein [Pedobacter cryoconitis].                                 | GCF_014207145.1 |
| WP_184790984.1 | TM+TPR+PIN*→                                                                          | TM+TPR+PIN                 | 1158 | -        | Actinobacteria      | Phytomonospora endophytica    | hypothetical protein [Phytomonospora endophytica].                             | GCF_016862855.1 |
| WP_184920984.1 | REase+PIN*→                                                                           | REase+PIN                  | 1270 | -        | Actinobacteria      | Saccharothrix ecbatanensis    | DUF4365 domain-containing protein [Saccharothrix ecbatanensis].                | GCF_014205015.1 |
| WP_185002860.1 | -                                                                                     | -                          | 1209 | -        | Actinobacteria      | unclassified Curtobacterium   | MULTISPECIES: DUF4365 domain-containing protein [unclassified Curtobacterium]. | GCF_003752345.1 |
| WP_186065300.1 | REase+TPR+GreAB-C+PIN*→                                                               | REase+TPR+GreAB-C+PIN      | 1351 | -        | Betaproteobacteria  | Burkholderia gladioli         | hypothetical protein [Burkholderia gladioli].                                  | GCF_902831285.1 |
| WP_186083524.1 | REase+TPR+GreAB-C+PIN*→   <-?<-?<-HEPN                                                | REase+TPR+GreAB-C+PIN      | 1333 | -        | Betaproteobacteria  | Burkholderia gladioli         | hypothetical protein [Burkholderia gladioli].                                  | GCF_902831185.1 |
| WP_186117779.1 | HEPN→?→?→ REase+TPR+GreAB-C+PIN*→                                                     | REase+TPR+GreAB-C+PIN      | 1498 | -        | Betaproteobacteria  | Burkholderia gladioli         | tetratricopeptide repeat protein [Burkholderia gladioli].                      | GCF_902831505.1 |
| WP_186135768.1 | REase+TPR+GreAB-C+PIN*→   <-HEPN                                                      | REase+TPR+GreAB-C+PIN      | 1351 | -        | Betaproteobacteria  | Burkholderia gladioli         | hypothetical protein [Burkholderia gladioli].                                  | GCF_902831685.1 |
| WP_186296902.1 | REase+TPR+GreAB-C+PIN*→                                                               | REase+TPR+GreAB-C+PIN      | 1297 | -        | Betaproteobacteria  | Cupriavidus campinensis       | DUF4365 domain-containing protein [Cupriavidus campinensis].                   | GCF_007572485.1 |
| WP_186384760.1 | HetE-N1→ TPR+GreAB-C+PIN*→                                                            | TPR+GreAB-C+PIN            | 1117 | -        | Gammaproteobacteria | Klebsiella sp. Kpp            | hypothetical protein [Klebsiella sp. Kpp].                                     | GCF_014267405.1 |
| WP_186426553.1 | TPR+GreAB-C+PIN*→                                                                     | TPR+GreAB-C+PIN            | 1039 | -        | Betaproteobacteria  | Cupriavidus metallidurans     | hypothetical protein [Cupriavidus metallidurans].                              | GCF_900185755.1 |
| WP_187028576.1 | TPR+GreAB-C+PIN*→                                                                     | TPR+GreAB-C+PIN            | 1238 | -        | Bacteroidetes       | Pontibacter sp. KCTC 32443    | hypothetical protein [Pontibacter sp. KCTC 32443].                             | GCF_014297265.1 |
| WP_187110408.1 | REase+TPR+GreAB-C+PIN*→                                                               | REase+TPR+GreAB-C+PIN      | 1301 | -        | Betaproteobacteria  | Variovorax sp. PAMC26660      | hypothetical protein [Variovorax sp. PAMC26660].                               | GCF_014302995.1 |
| WP_187305744.1 | X+PIN*→ HTH→?→?→ HTH→                                                                 | X+PIN                      | 762  | -        | Firmicutes          | Dorea formicigenerans         | hypothetical protein [Dorea formicigenerans].                                  | GCF_003458845.1 |
| WP_187328643.1 | HTH+PNPase+TPR+GreAB-C+PIN*→                                                          | HTH+PNPase+TPR+GreAB-C+PIN | 1523 | -        | Actinobacteria      | Rhodococcus sp. WS3           | hypothetical protein [Rhodococcus sp. WS3].                                    | GCF_003797085.1 |
| WP_187494340.1 | HetE-N1→ TPR+GreAB-C+PIN*→                                                            | TPR+GreAB-C+PIN            | 1094 | -        | Gammaproteobacteria | Pantoea agglomerans           | hypothetical protein [Pantoea agglomerans].                                    | GCF_014353705.1 |
| WP_187598162.1 | REase+TPR+GreAB-C+PIN*→                                                               | REase+TPR+GreAB-C+PIN      | 1341 | -        | Betaproteobacteria  | Diaphorobacter ruginosibacter | hypothetical protein [Diaphorobacter ruginosibacter].                          | GCF_014395975.1 |
| WP_187723864.1 | TPR+GreAB-C+PIN*→                                                                     | TPR+GreAB-C+PIN            | 545  | -        | Betaproteobacteria  | Diaphorobacter aerolatus      | hypothetical protein [Diaphorobacter aerolatus].                               | GCF_014489535.1 |
| WP_187993242.1 | TPR+GreAB-C+PIN*→                                                                     | TPR+GreAB-C+PIN            | 557  | -        | Gammaproteobacteria | Vibrio Harveyi                | hypothetical protein [Vibrio Harveyi].                                         | GCF_014525195.1 |
| WP_188104481.1 | REase+TPR+GreAB-C+PIN*→                                                               | REase+TPR+GreAB-C+PIN      | 1312 | -        | Alphaproteobacteria | Bradyrhizobium campsiandrae   | tetratricopeptide repeat protein [Bradyrhizobium campsiandrae].                | GCF_014529705.1 |
| WP_188533557.1 | TPR+PIN*→                                                                             | TPR+PIN                    | 1228 | -        | Firmicutes          | Paenibacillus abyssi          | hypothetical protein [Paenibacillus abyssi].                                   | GCF_014640295.1 |
| WP_189032568.1 | TPR+PIN*→                                                                             | TPR+PIN                    | 531  | -        | Firmicutes          | Paenibacillus albidus         | hypothetical protein [Paenibacillus albidus].                                  | GCF_014644435.1 |
| WP_189091600.1 | REase+TPR+GreAB-C+PIN*→                                                               | REase+TPR+GreAB-C+PIN      | 1377 | -        | Deinococci          | Deinococcus ruber             | tetratricopeptide repeat protein [Deinococcus ruber].                          | GCF_014648095.1 |
| WP_189152287.1 | TPR+PIN*→                                                                             | TPR+PIN                    | 1218 | -        | Actinobacteria      | Streptomyces lacrimiflumini   | hypothetical protein [Streptomyces lacrimiflumini].                            | GCF_014646095.1 |
| WP_189484308.1 | HetE-N1→ TPR+GreAB-C+PIN*→                                                            | TPR+GreAB-C+PIN            | 1026 | -        | Gammaproteobacteria | Shewanella indica             | hypothetical protein [Shewanella indica].                                      | GCF_014652115.1 |
| WP_189568857.1 | Mbetalac→ TPR+GreAB-C+PIN*→                                                           | TPR+GreAB-C+PIN            | 1342 | -        | Bacteroidetes       | Persicitalea jodogahamensis   | hypothetical protein [Persicitalea jodogahamensis].                            | GCF_014651615.1 |
| WP_189617689.1 | HetE-N1→?→ GreAB-C*→                                                                  | GreAB-C                    | 498  | -        | Gammaproteobacteria | Shewanella fodinae            | hypothetical protein [Shewanella fodinae].                                     | GCF_014651955.1 |
| WP_189635482.1 | REase+TPR+GreAB-C+PIN*→                                                               | REase+TPR+GreAB-C+PIN      | 1307 | -        | Alphaproteobacteria | Gemmobacter lanyuensis        | restriction endonuclease [Gemmobacter lanyuensis].                             | GCF_014652355.1 |
| WP_189677864.1 | REase+TPR+GreAB-C+PIN*→                                                               | REase+TPR+GreAB-C+PIN      | 1323 | -        | Alphaproteobacteria | Sphingomonas glacialis        | tetratricopeptide repeat protein [Sphingomonas glacialis].                     | GCF_014653575.1 |
| WP_189835257.1 | TPR+PIN*→                                                                             | TPR+PIN                    | 1215 | -        | Actinobacteria      | Streptomyces zaomyceticus     | hypothetical protein [Streptomyces zaomyceticus].                              | GCF_014656215.1 |
| WP_190462433.1 | PNPase+TPR+GreAB-C+PIN*→ TPR+TPR→ TPR+TPR→                                            | PNPase+TPR+GreAB-C+PIN     | 1385 | -        | Cyanobacteria       | unclassified Planktothrix     | MULTISPECIES: hypothetical protein [unclassified Planktothrix].                | GCF_014696265.1 |
| WP_190659344.1 | BTLCP+NACHT→ APATPase+BetaPropeller→ APATPase+BetaPropeller→ PNPase+TPR+GreAB-C+PIN*→ | PNPase+TPR+GreAB-C+PIN     | 1399 | -        | Cyanobacteria       | Nostoc linckia                | tetratricopeptide repeat protein [Nostoc linckia].                             | GCF_014696615.1 |
| WP_190786133.1 | <-REase+nSTAND3  TPR+GreAB-C+PIN*→                                                    | TPR+GreAB-C+PIN            | 1282 | -        | Bacteroidetes       | Hymenobacter sp. BT646        | hypothetical protein [Hymenobacter sp. BT646].                                 | GCF_014698995.1 |
| WP_191117766.1 | HetE-N1→ TPR+GreAB-C+PIN*→                                                            | TPR+GreAB-C+PIN            | 1091 | -        | Gammaproteobacteria | Vibrio campbellii             | hypothetical protein [Vibrio campbellii].                                      | GCF_014769105.1 |
| WP_191340685.1 | REase+SNF2→ URI+RAMA→ TPR+GreAB-C+PIN*→                                               | TPR+GreAB-C+PIN            | 1182 | -        | Firmicutes          | Massilimicrobiota sp. An134   | hypothetical protein [Massilimicrobiota sp. An134].                            | GCF_904393125.1 |
| WP_191375963.1 | TPR+GreAB-C+PIN*→                                                                     | TPR+GreAB-C+PIN            | 879  | -        | Firmicutes          | [Clostridium] spiroforme      | hypothetical protein [[Clostridium] spiroforme].                               | GCF_904395875.1 |

| acc            | operon                                       | architecture              | len  | gen.name | taxend              | species                    | define                                                           | gca             |
|----------------|----------------------------------------------|---------------------------|------|----------|---------------------|----------------------------|------------------------------------------------------------------|-----------------|
| WP_191791215.1 | TPR+PIN*→                                    | TPR+PIN                   | 1225 | -        | Actinobacteria      | Oerskovia sp. Sa2CUA8      | hypothetical protein [Oerskovia sp. Sa2CUA8].                    | GCF_014836745.1 |
| WP_191917190.1 | HetE-N1→ TPR+GreAB-C+PIN*→                   | TPR+GreAB-C+PIN           | 1094 | -        | Gammaproteobacteria | Pantoea agglomerans        | hypothetical protein [Pantoea agglomerans].                      | GCF_014839545.1 |
| WP_191940182.1 | X+PIN*→                                      | X+PIN                     | 1078 | -        | Actinobacteria      | Plantibacter sp. CFBP 8775 | hypothetical protein [Plantibacter sp. CFBP 8775].               | GCF_014839505.1 |
| WP_191950701.1 | REase+TPR+GreAB-C+PIN*→                      | REase+TPR+GreAB-C+PIN     | 1485 | -        | Gammaproteobacteria | Pseudomonas fluorescens    | hypothetical protein [Pseudomonas fluorescens].                  | GCF_014839025.1 |
| WP_191971068.1 | TPR+GreAB-C+PIN*→                            | TPR+GreAB-C+PIN           | 525  | -        | Alphaproteobacteria | Methylobacterium soli      | hypothetical protein [Methylobacterium soli].                    | GCF_008806385.1 |
| WP_191999584.1 | REase+TPR+GreAB-C+PIN*→   <-?<-EAD2          | REase+TPR+GreAB-C+PIN     | 1036 | -        | Gammaproteobacteria | Pseudomonas coleopterorum  | hypothetical protein [Pseudomonas coleopterorum].                | GCF_014841305.1 |
| WP_192069209.1 | HetE-N1→ TPR+GreAB-C+PIN*→                   | TPR+GreAB-C+PIN           | 1105 | -        | Gammaproteobacteria | Pseudomonas coleopterorum  | hypothetical protein [Pseudomonas coleopterorum].                | GCF_014842375.1 |
| WP_192163653.1 | REase+TPR+GreAB-C+PIN*→                      | REase+TPR+GreAB-C+PIN     | 1250 | -        | Gammaproteobacteria | Rhodanobacter sp. DHG33    | hypothetical protein [Rhodanobacter sp. DHG33].                  | GCF_014843005.1 |
| WP_192260260.1 | REase+TPR+GreAB-C+PIN*→                      | REase+TPR+GreAB-C+PIN     | 1441 | -        | Gammaproteobacteria | Pseudomonas sp. Pdm06      | hypothetical protein [Pseudomonas sp. Pdm06].                    | GCF_014851795.1 |
| WP_192264655.1 | REase+TPR+GreAB-C+PIN*→                      | REase+TPR+GreAB-C+PIN     | 1316 | -        | Alphaproteobacteria | Komagataeibacter hansenii  | hypothetical protein [Komagataeibacter hansenii].                | GCF_014843995.1 |
| WP_192393207.1 | HetE-N1→ TPR+GreAB-C+PIN*→                   | TPR+GreAB-C+PIN           | 1117 | -        | Gammaproteobacteria | Methylomonas sp. EbB       | hypothetical protein [Methylomonas sp. EbB].                     | GCF_903064685.1 |
| WP_192433772.1 | HEPN→ REase+TPR+TPR+GreAB-C+PIN*→            | REase+TPR+TPR+GreAB-C+PIN | 1339 | -        | Alphaproteobacteria | Ensifer sp. ENS11          | hypothetical protein [Ensifer sp. ENS11].                        | GCF_014851895.1 |
| WP_192504527.1 | HetE-N1→ TPR+GreAB-C+PIN*→                   | TPR+GreAB-C+PIN           | 1119 | -        | Gammaproteobacteria | Rouxiella badensis         | hypothetical protein [Rouxiella badensis].                       | GCF_014859005.1 |
| WP_192836185.1 | HetE-N1→ TPR+GreAB-C+PIN*→                   | TPR+GreAB-C+PIN           | 1092 | -        | Gammaproteobacteria | Acinetobacter oleivorans   | hypothetical protein [Acinetobacter oleivorans].                 | GCF_014876825.1 |
| WP_193132365.1 | HetE-N1→ TPR+GreAB-C+PIN+TM+TM*→             | TPR+GreAB-C+PIN+TM+TM     | 1086 | -        | Gammaproteobacteria | Enterobacter hormaechei    | hypothetical protein, partial [Enterobacter hormaechei].         | GCF_014901495.1 |
| WP_193343548.1 | HetE-N1→ TPR+GreAB-C+PIN*→?→ PhospholipaseD→ | TPR+GreAB-C+PIN           | 1103 | -        | Gammaproteobacteria | Halomonas elongata         | hypothetical protein [Halomonas elongata].                       | GCF_014926355.1 |
| WP_193426153.1 | TPR+PIN*→                                    | TPR+PIN                   | 1217 | -        | Firmicutes          | Priestia aryabhatai        | hypothetical protein [Priestia aryabhatai].                      | GCF_014932885.1 |
| WP_193843312.1 | HetE-N1→ TPR+GreAB-C+PIN*→                   | TPR+GreAB-C+PIN           | 1090 | -        | Gammaproteobacteria | Serratia marcescens        | hypothetical protein [Serratia marcescens].                      | GCF_015160915.1 |
| WP_194030396.1 | PNPase+TPR+GreAB-C+PIN*→                     | PNPase+TPR+GreAB-C+PIN    | 1392 | -        | Cyanobacteria       | Lusitaniella coriacea      | hypothetical protein [Lusitaniella coriacea].                    | GCF_015207425.1 |
| WP_194552914.1 | TPR+GreAB-C+PIN*→                            | TPR+GreAB-C+PIN           | 1236 | -        | Gammaproteobacteria | Vibrio anguillarum         | hypothetical protein [Vibrio anguillarum].                       | GCF_015343355.1 |
| WP_194640651.1 | TPR+GreAB-C+PIN*→                            | TPR+GreAB-C+PIN           | 1123 | -        | Bacteroidetes       | Flavobacterium sp. HJJ     | hypothetical protein [Flavobacterium sp. HJJ].                   | GCF_015351475.1 |
| WP_194689942.1 | REase+TPR+GreAB-C+PIN*→                      | REase+TPR+GreAB-C+PIN     | 1323 | -        | Alphaproteobacteria | unclassified Gluconobacter | MULTISPECIES: hypothetical protein [unclassified Gluconobacter]. | GCF_015353155.1 |
| WP_194782158.1 | TPR+PIN*→                                    | TPR+PIN                   | 1183 | -        | Actinobacteria      | Arthrobacter gandavensis   | hypothetical protein [Arthrobacter gandavensis].                 | GCF_015355785.1 |
| WP_194849029.1 | HetE-N1→ TPR+GreAB-C+PIN*→                   | TPR+GreAB-C+PIN           | 1094 | -        | Gammaproteobacteria | Escherichia coli           | hypothetical protein [Escherichia coli].                         | GCF_015356625.1 |
| WP_194908878.1 | TPR+PIN*→                                    | TPR+PIN                   | 1322 | -        | Actinobacteria      | Catenulispora rubra        | hypothetical protein [Catenulispora rubra].                      | GCF_015356825.1 |
| WP_195550768.1 | TM+TM+TPR+PIN*→                              | TM+TM+TPR+PIN             | 1183 | -        | Bacteroidetes       | Bacteroides uniformis      | hypothetical protein [Bacteroides uniformis].                    | GCF_015557045.1 |
| WP_195789843.1 | REase+TPR+GreAB-C+PIN*→                      | REase+TPR+GreAB-C+PIN     | 1310 | -        | Alphaproteobacteria | Bradyrhizobium genosp. L   | hypothetical protein [Bradyrhizobium genosp. L].                 | GCF_015624485.1 |
| WP_196103949.1 | TPR+GreAB-C+PIN*→                            | TPR+GreAB-C+PIN           | 468  | -        | Alphaproteobacteria | Pontivivens sp. MT2928     | hypothetical protein [Pontivivens sp. MT2928].                   | GCF_015679265.1 |
| WP_196165874.1 | TPR+GreAB-C+PIN*→                            | TPR+GreAB-C+PIN           | 1139 | -        | Gammaproteobacteria | Pseudomonas monteilii      | hypothetical protein [Pseudomonas monteilii].                    | GCF_015680735.1 |
| WP_196184162.1 | REase+TPR+GreAB-C+PIN*→                      | REase+TPR+GreAB-C+PIN     | 1545 | -        | Gammaproteobacteria | Pseudomonas asiatica       | hypothetical protein [Pseudomonas asiatica].                     | GCF_015680805.1 |
| WP_196343881.1 | HetE-N1→ TPR+GreAB-C+PIN*→                   | TPR+GreAB-C+PIN           | 1106 | -        | Gammaproteobacteria | Enterobacter hormaechei    | hypothetical protein [Enterobacter hormaechei].                  | GCF_015704145.1 |
| WP_196402364.1 | REase+TPR+TPR+GreAB-C+PIN*→                  | REase+TPR+TPR+GreAB-C+PIN | 1304 | -        | Alphaproteobacteria | Methylocystis sp. H62      | hypothetical protein [Methylocystis sp. H62].                    | GCF_015709515.1 |
| WP_197022618.1 | REase+TPR+GreAB-C+PIN*→                      | REase+TPR+GreAB-C+PIN     | 1388 | -        | Betaproteobacteria  | Comamonas aquatica         | hypothetical protein [Comamonas aquatica].                       | GCF_000590985.1 |
| WP_197265512.1 | TPR+PIN*→                                    | TPR+PIN                   | 1231 | -        | Firmicutes          | Fictibacillus sp. 23RED33  | hypothetical protein [Fictibacillus sp. 23RED33].                | GCF_015903925.1 |
| WP_197283942.1 | GreAB-C+PIN*→                                | GreAB-C+PIN               | 553  | -        | Alphaproteobacteria | Rhizobium acidisoli        | hypothetical protein, partial [Rhizobium acidisoli].             | GCF_001297245.1 |
| WP_197310646.1 | REase+TPR+TPR+GreAB-C+PIN*→                  | REase+TPR+TPR+GreAB-C+PIN | 1326 | -        | Alphaproteobacteria | Methylobrevus sp. L22      | hypothetical protein [Methylobrevus sp. L22].                    | GCF_015904235.1 |
| WP_197451745.1 | REase+TPR+GreAB-C+PIN*→                      | REase+TPR+GreAB-C+PIN     | 1195 | -        | Planctomycetes      | Rosistilla oblonga         | GreA/GreB family elongation factor [Rosistilla oblonga].         | GCF_007751715.1 |
| WP_197873110.1 | TPR+GreAB-C+PIN*→                            | TPR+GreAB-C+PIN           | 1139 | -        | Gammaproteobacteria | Pseudomonas lutea          | hypothetical protein [Pseudomonas lutea].                        | GCF_016009245.1 |
| WP_198113276.1 | TPR+GreAB-C+PIN*→   <-HTH+HTH                | TPR+GreAB-C+PIN           | 872  | -        | Betaproteobacteria  | Burkholderia contaminans   | hypothetical protein [Burkholderia contaminans].                 | GCF_016092105.1 |
| WP_198215548.1 | HetE-N1→ TPR+GreAB-C+PIN*→                   | TPR+GreAB-C+PIN           | 1126 | -        | Gammaproteobacteria | Gilliamella sp. M0320      | hypothetical protein [Gilliamella sp. M0320].                    | GCF_016101635.1 |
| WP_198575560.1 | REase+TPR+GreAB-C+PIN*→                      | REase+TPR+GreAB-C+PIN     | 1332 | -        | Alphaproteobacteria | Caulobacter hibisci        | DUF4365 domain-containing protein [Caulobacter hibisci].         | GCF_016135805.1 |
| WP_198597141.1 | HetE-N1→?→ GreAB-C*→                         | GreAB-C                   | 475  | -        | Gammaproteobacteria | Vibrio splendidus          | hypothetical protein [Vibrio splendidus].                        | GCF_002877525.1 |
| WP_198628691.1 | TPR+GreAB-C+PIN*→                            | TPR+GreAB-C+PIN           | 1231 | -        | Bacteroidetes       | Salagentibacter sp. F63223 | hypothetical protein [Salagentibacter sp. F63223].               | GCF_016236915.1 |
| WP_198694995.1 | REase+TPR+GreAB-C+PIN*→                      | REase+TPR+GreAB-C+PIN     | 1436 | -        | Gammaproteobacteria | Pseudomonas viridiflava    | hypothetical protein [Pseudomonas viridiflava].                  | GCF_016308365.1 |

| acc            | operon                                  | architecture                 | len  | gen.name | taxend              | species                                      | define                                                            | gca             |
|----------------|-----------------------------------------|------------------------------|------|----------|---------------------|----------------------------------------------|-------------------------------------------------------------------|-----------------|
| WP_198710862.1 | REase+TPR+GreAB-C+PIN*→                 | REase+TPR+GreAB-C+PIN        | 1321 | -        | Gammaproteobacteria | <i>Pseudomonas syringae</i>                  | DUF4365 domain-containing protein [Pseudomonas syringae].         | GCF_016308175.1 |
| WP_198739586.1 | HetE-N1→ TPR+GreAB-C+PIN*→              | TPR+GreAB-C+PIN              | 1106 | -        | Gammaproteobacteria | <i>Enterobacter hormaechei</i>               | hypothetical protein [Enterobacter hormaechei].                   | GCF_016342225.1 |
| WP_198742183.1 | HetE-N1→ TPR+GreAB-C+PIN*→              | TPR+GreAB-C+PIN              | 1106 | -        | Gammaproteobacteria | <i>Enterobacter hormaechei</i>               | hypothetical protein [Enterobacter hormaechei].                   | GCF_016342135.1 |
| WP_198830693.1 | REase+TPR+GreAB-C+PIN*→                 | REase+TPR+GreAB-C+PIN        | 1441 | -        | Gammaproteobacteria | <i>Pseudomonas sp. MF5691</i>                | hypothetical protein [Pseudomonas sp. MF5691].                    | GCF_016405645.1 |
| WP_198862330.1 | REase+TPR+GreAB-C+PIN*→                 | REase+TPR+GreAB-C+PIN        | 1324 | -        | Gammaproteobacteria | <i>Pseudomonas carnis</i>                    | DUF4365 domain-containing protein [Pseudomonas carnis].           | GCF_016405215.1 |
| WP_199041247.1 | REase+TPR+GreAB-C+PIN*→                 | REase+TPR+GreAB-C+PIN        | 1250 | -        | Gammaproteobacteria | <i>Dyella sp. ASV24</i>                      | hypothetical protein [Dyella sp. ASV24].                          | GCF_016428905.1 |
| WP_199059400.1 | REase+TPR+TPR+GreAB-C+PIN*→             | REase+TPR+TPR+GreAB-C+PIN    | 1334 | -        | Alphaproteobacteria | <i>Brevundimonas sp. ASV9</i>                | hypothetical protein [Brevundimonas sp. ASV9].                    | GCF_016429195.1 |
| WP_199059891.1 | REase+TPR+GreAB-C+PIN*→                 | REase+TPR+GreAB-C+PIN        | 1302 | -        | Alphaproteobacteria | <i>Brevundimonas sp. ASV9</i>                | hypothetical protein [Brevundimonas sp. ASV9].                    | GCF_016429195.1 |
| WP_199133123.1 | TPR+GreAB-C+PIN*→                       | TPR+GreAB-C+PIN              | 1258 | -        | Bacteroidetes       | <i>Pedobacter sp. ASV17</i>                  | hypothetical protein [Pedobacter sp. ASV17].                      | GCF_016429065.1 |
| WP_199161798.1 | TPR+GreAB-C+PIN*→                       | TPR+GreAB-C+PIN              | 1140 | -        | Bacteroidetes       | <i>Elizabethkingia sp. ASV34</i>             | hypothetical protein [Elizabethkingia sp. ASV34].                 | GCF_016428745.1 |
| WP_199216499.1 | TPR+PIN*→                               | TPR+PIN                      | 1215 | -        | Actinobacteria      | <i>Streptomyces sp. I5</i>                   | hypothetical protein [Streptomyces sp. I5].                       | GCF_016432735.1 |
| WP_199272510.1 | REase+TPR+GreAB-C+PIN*→                 | REase+TPR+GreAB-C+PIN        | 1359 | -        | Betaproteobacteria  | <i>Paraburkholderia acidisoli</i>            | hypothetical protein [Paraburkholderia acidisoli].                | GCF_009789675.1 |
| WP_199515964.1 | TM+TPR+PIN*→                            | TM+TPR+PIN                   | 1145 | -        | Actinobacteria      | <i>Pseudosporangium sp. NEAU-24</i>          | tetratricopeptide repeat protein [Pseudosporangium sp. NEAU-24].  | GCF_016464385.1 |
| WP_199591321.1 | REase+TPR+GreAB-C+PIN*→                 | REase+TPR+GreAB-C+PIN        | 1505 | -        | Betaproteobacteria  | <i>Pelomonas sp. OAE585</i>                  | hypothetical protein [Pelomonas sp. OAE585].                      | GCF_016467315.1 |
| WP_199660563.1 | TPR+GreAB-C+PIN*→                       | TPR+GreAB-C+PIN              | 1035 | -        | Gammaproteobacteria | <i>Klebsiella quasipneumoniae</i>            | hypothetical protein, partial [Klebsiella quasipneumoniae].       | GCF_016491635.1 |
| WP_199707330.1 | REase→ PIN*→                            | PIN                          | 932  | -        | Actinobacteria      | <i>Antrihabitans sp. YC3-6</i>               | hypothetical protein [Antrihabitans sp. YC3-6].                   | GCF_016482825.1 |
| WP_199727385.1 | REase+TPR+GreAB-C+PIN*→                 | REase+TPR+GreAB-C+PIN        | 1488 | -        | Gammaproteobacteria | <i>Pseudomonas syringae</i> group genomsp. 7 | hypothetical protein [Pseudomonas syringae group genomsp. 7].     | GCF_003703295.1 |
| WP_199743158.1 | REase+TPR+GreAB-C+PIN*→                 | REase+TPR+GreAB-C+PIN        | 1009 | -        | Alphaproteobacteria | <i>Sphingomonas ginsenosidivorax</i>         | tetratricopeptide repeat protein [Sphingomonas ginsenosidivorax]. | GCF_007995065.1 |
| WP_199871858.1 | HetE-N1→ HetE-N1+TPR+GreAB-C+PIN*→      | HetE-N1+TPR+GreAB-C+PIN      | 1088 | -        | Gammaproteobacteria | <i>Vibrio anguillarum</i>                    | hypothetical protein [Vibrio anguillarum].                        | GCF_015350415.1 |
| WP_200204777.1 | HetE-N1→ TPR+GreAB-C+PIN*→              | TPR+GreAB-C+PIN              | 1116 | -        | Gammaproteobacteria | <i>Marinobacter sp. 1-3A</i>                 | hypothetical protein [Marinobacter sp. 1-3A].                     | GCF_016597775.1 |
| WP_200282902.1 | TPR+PIN*→                               | TPR+PIN                      | 1263 | -        | Verrucomicrobia     | <i>Haloferula rosea</i>                      | hypothetical protein [Haloferula rosea].                          | GCF_016595525.1 |
| WP_200597934.1 | HetE-N1→ TPR+GreAB-C+PIN*→              | TPR+GreAB-C+PIN              | 1112 | -        | Gammaproteobacteria | <i>Pseudomonas stutzeri</i>                  | hypothetical protein [Pseudomonas stutzeri].                      | GCF_016622345.1 |
| WP_200602419.1 | REase+TPR+GreAB-C+PIN*→                 | REase+TPR+GreAB-C+PIN        | 1441 | -        | Gammaproteobacteria | <i>Pseudomonas sp. S44</i>                   | hypothetical protein [Pseudomonas sp. S44].                       | GCF_016624805.1 |
| WP_201009307.1 | REase+PIN*→                             | REase+PIN                    | 1247 | -        | Actinobacteria      | <i>Rhodococcus sp. NKCM2511</i>              | DUF4365 domain-containing protein [Rhodococcus sp. NKCM2511].     | GCF_014905595.1 |
| WP_201090676.1 | HetE-N1→ TPR+GreAB-C+PIN*→              | TPR+GreAB-C+PIN              | 1083 | -        | Gammaproteobacteria | <i>Entomomonas sp. F2A</i>                   | hypothetical protein [Entomomonas sp. F2A].                       | GCF_016653615.1 |
| WP_201420192.1 | REase+TPR+GreAB-C+PIN*→                 | REase+TPR+GreAB-C+PIN        | 1442 | -        | Gammaproteobacteria | <i>Pseudomonas syringae</i>                  | hypothetical protein [Pseudomonas syringae].                      | GCF_016694755.2 |
| WP_201621921.1 | REase+TPR+GreAB-C+PIN*→                 | REase+TPR+GreAB-C+PIN        | 1244 | -        | Gammaproteobacteria | <i>Psychrobacter urativorans</i>             | hypothetical protein [Psychrobacter urativorans].                 | GCF_904846695.1 |
| WP_201915404.1 | REase+TPR+GreAB-C+PIN*→                 | REase+TPR+GreAB-C+PIN        | 1321 | -        | Gammaproteobacteria | <i>Pseudomonas fluorescens</i>               | DUF4365 domain-containing protein [Pseudomonas fluorescens].      | GCF_016728065.1 |
| WP_201921162.1 | HetE-N1→ TPR+GreAB-C+PIN*→              | TPR+GreAB-C+PIN              | 1094 | -        | Gammaproteobacteria | <i>Aeromonas caviae</i>                      | hypothetical protein [Aeromonas caviae].                          | GCF_016729435.1 |
| WP_201996904.1 | HetE-N1→ MNS-Npun2340+TPR+GreAB-C+PIN*→ | MNS-Npun2340+TPR+GreAB-C+PIN | 1094 | -        | Gammaproteobacteria | <i>Aeromonas caviae</i>                      | hypothetical protein [Aeromonas caviae].                          | GCF_016728955.1 |
| WP_202685167.1 | REase+TPR+GreAB-C+PIN*→                 | REase+TPR+GreAB-C+PIN        | 1019 | -        | Alphaproteobacteria | <i>Skermanella mucosa</i>                    | hypothetical protein, partial [Skermanella mucosa].               | GCF_016765655.1 |
| WP_202722978.1 | HetE-N1→ TPR+GreAB-C+PIN*→              | TPR+GreAB-C+PIN              | 1141 | -        | Gammaproteobacteria | <i>Shewanella schlegeliana</i>               | hypothetical protein [Shewanella schlegeliana].                   | GCF_016765635.1 |
| WP_202727723.1 | HetE-N1→ TPR+GreAB-C+PIN*→              | TPR+GreAB-C+PIN              | 1094 | -        | Gammaproteobacteria | <i>Serratia fonticola</i>                    | hypothetical protein [Serratia fonticola].                        | GCF_016770915.1 |
| WP_203042134.1 | HetE-N1→ TPR+GreAB-C+PIN*→              | TPR+GreAB-C+PIN              | 1106 | -        | Gammaproteobacteria | <i>Enterobacter hormaechei</i>               | hypothetical protein [Enterobacter hormaechei].                   | GCF_016791625.1 |
| WP_203341318.1 | TPR+PIN*→                               | TPR+PIN                      | 1141 | -        | Firmicutes          | <i>Planomicrobium sp. REN14</i>              | hypothetical protein [Planomicrobium sp. REN14].                  | GCF_016820615.1 |
| WP_203380482.1 | REase+TPR+GreAB-C+PIN*→                 | REase+TPR+GreAB-C+PIN        | 1231 | -        | Actinobacteria      | <i>Actinoplanes sp. LDG1-06</i>              | DUF4365 domain-containing protein [Actinoplanes sp. LDG1-06].     | GCF_016834655.1 |
| WP_203735920.1 | TPR+PIN*→                               | TPR+PIN                      | 1176 | -        | Actinobacteria      | <i>Actinoplanes durhamensis</i>              | hypothetical protein [Actinoplanes durhamensis].                  | GCF_016862175.1 |
| WP_203841861.1 | REase+TPR+GreAB-C+PIN*→                 | REase+TPR+GreAB-C+PIN        | 1259 | -        | Actinobacteria      | <i>Actinoplanes humidus</i>                  | DUF4365 domain-containing protein [Actinoplanes humidus].         | GCF_016862215.1 |
| WP_204008964.1 | REase+TPR+GreAB-C+PIN*→                 | REase+TPR+GreAB-C+PIN        | 1356 | -        | Actinobacteria      | <i>Micromonospora andamanensis</i>           | hypothetical protein [Micromonospora andamanensis].               | GCF_016863495.1 |
| WP_204028926.1 | REase+TPR+GreAB-C+PIN*→                 | REase+TPR+GreAB-C+PIN        | 1338 | -        | Actinobacteria      | <i>Sinosporangium siamense</i>               | hypothetical protein [Sinosporangium siamense].                   | GCF_016863435.1 |

| acc            | operon                                   | architecture              | len  | gen.name | taxend              | species                                   | define                                                              | gca             |
|----------------|------------------------------------------|---------------------------|------|----------|---------------------|-------------------------------------------|---------------------------------------------------------------------|-----------------|
| WP_204127404.1 | HetE-N1→ TPR+GreAB-C+PIN*→   <-HNH       | TPR+GreAB-C+PIN           | 1110 | -        | Gammaproteobacteria | <i>Pseudomonas</i> sp. RDP1               | hypothetical protein [Pseudomonas sp. RDP1].                        | GCF_016887885.1 |
| WP_204370319.1 | TPR+GreAB-C+PIN*→                        | TPR+GreAB-C+PIN           | 860  | -        | Betaproteobacteria  | <i>Burkholderia cepacia</i>               | tetratricopeptide repeat protein, partial [Burkholderia cepacia].   | GCF_001052915.1 |
| WP_204511064.1 | REase+TPR+GreAB-C+PIN*→                  | REase+TPR+GreAB-C+PIN     | 1349 | -        | Alphaproteobacteria | <i>Bradyrhizobium canariense</i>          | tetratricopeptide repeat protein [Bradyrhizobium canariense].       | GCF_016907215.1 |
| WP_204648469.1 | TPR+PIN*→                                | TPR+PIN                   | 1235 | -        | Firmicutes          | <i>Gemmiger formicilis</i>                | hypothetical protein [Gemmiger formicilis].                         | GCF_016900095.1 |
| WP_204732305.1 | REase+TPR+GreAB-C+PIN*→                  | REase+TPR+GreAB-C+PIN     | 1447 | -        | Betaproteobacteria  | <i>Hydrogenophaga laconesensis</i>        | hypothetical protein [Hydrogenophaga laconesensis].                 | GCF_016909585.1 |
| WP_204856598.1 | REase+PIN*→                              | REase+PIN                 | 1247 | -        | Actinobacteria      | <i>Rhodococcus fascians</i>               | DUF4365 domain-containing protein [Rhodococcus fascians].           | GCF_016909505.1 |
| WP_204934318.1 | REase+TPR+GreAB-C+PIN*→                  | REase+TPR+GreAB-C+PIN     | 1321 | -        | Gammaproteobacteria | <i>Pseudomonas stutzeri</i>               | DUF4365 domain-containing protein [Pseudomonas stutzeri].           | GCF_016909445.1 |
| WP_204944661.1 | TPR+PIN*→                                | TPR+PIN                   | 1203 | -        | Actinobacteria      | <i>Micromonospora luteifusca</i>          | hypothetical protein [Micromonospora luteifusca].                   | GCF_016907275.1 |
| WP_205045164.1 | TPR+PIN*→                                | TPR+PIN                   | 1168 | -        | Actinobacteria      | <i>Streptomyces bryophytorum</i>          | hypothetical protein [Streptomyces bryophytorum].                   | GCF_017164735.1 |
| WP_205483425.1 | REase+TPR+GreAB-C+PIN→ TPR→   <-?  PIN*→ | PIN                       | 365  | -        | Gammaproteobacteria | <i>Pseudomonas</i> sp. 15A4               | hypothetical protein [Pseudomonas sp. 15A4].                        | GCF_016925575.1 |
| WP_206013307.1 | HetE-N1→ TPR+GreAB-C+PIN*→               | TPR+GreAB-C+PIN           | 1090 | -        | Gammaproteobacteria | <i>Pseudoalteromonas</i> sp. Z9A6         | hypothetical protein [Pseudoalteromonas sp. Z9A6].                  | GCF_011378805.1 |
| WP_206497574.1 | REase+PIN*→                              | REase+PIN                 | 1021 | -        | Actinobacteria      | <i>Rhodococcus</i> sp. KRD175             | hypothetical protein [Rhodococcus sp. KRD175].                      | GCF_017168275.1 |
| WP_206556849.1 | HetE-N1→ TPR+GreAB-C+PIN*→               | TPR+GreAB-C+PIN           | 1116 | -        | Gammaproteobacteria | <i>Marinobacter daepoensis</i>            | hypothetical protein [Marinobacter daepoensis].                     | GCF_017255165.1 |
| WP_206628468.1 | HetE-N1→ TPR+GreAB-C+PIN*→               | TPR+GreAB-C+PIN           | 1116 | -        | Gammaproteobacteria | <i>Vibrio vulnificus</i>                  | hypothetical protein [Vibrio vulnificus].                           | GCF_017291135.1 |
| WP_206676035.1 | HTH→ SIG+TM→ TPR+GreAB-C+PIN*→           | TPR+GreAB-C+PIN           | 1125 | -        | Bacteroidetes       | <i>Capnocytophaga canis</i>               | hypothetical protein [Capnocytophaga canis].                        | GCF_013276255.1 |
| WP_206820216.1 | REase+TPR+GreAB-C+PIN*→                  | REase+TPR+GreAB-C+PIN     | 1215 | -        | Actinobacteria      | <i>Microbacterium esteraromaticum</i>     | DUF4365 domain-containing protein [Microbacterium esteraromaticum]. | GCF_017303135.1 |
| WP_206852091.1 | REase+TPR+GreAB-C+PIN*→                  | REase+TPR+GreAB-C+PIN     | 1289 | -        | Gammaproteobacteria | <i>Marinobacter hydrocarbonoclasticus</i> | hypothetical protein [Marinobacter hydrocarbonoclasticus].          | GCF_017303195.1 |
| WP_207418840.1 | TPR+GreAB-C+PIN*→   <-HTH+HTH            | TPR+GreAB-C+PIN           | 872  | -        | Betaproteobacteria  | <i>Burkholderia pseudomallei</i>          | hypothetical protein [Burkholderia pseudomallei].                   | GCF_017356705.1 |
| WP_207505725.1 | Mbetalac→ Trypsin+TPR+GreAB-C+PIN*→      | Trypsin+TPR+GreAB-C+PIN   | 1362 | -        | Bacteroidetes       | <i>Telluribacter humicola</i>             | serine protease [Telluribacter humicola].                           | GCF_017355935.1 |
| WP_207509935.1 | Mbetalac→ TPR+GreAB-C+PIN*→              | TPR+GreAB-C+PIN           | 1342 | -        | Bacteroidetes       | <i>Telluribacter humicola</i>             | hypothetical protein [Telluribacter humicola].                      | GCF_017355935.1 |
| WP_207967591.1 | HetE-N1→ TPR+GreAB-C+PIN*→               | TPR+GreAB-C+PIN           | 1090 | -        | Gammaproteobacteria | <i>Yersinia pseudotuberculosis</i>        | hypothetical protein [Yersinia pseudotuberculosis].                 | GCF_017498805.1 |
| WP_207993663.1 | HetE-N1→ TPR+GreAB-C+PIN*→               | TPR+GreAB-C+PIN           | 1122 | -        | Gammaproteobacteria | <i>Yersinia pseudotuberculosis</i>        | hypothetical protein [Yersinia pseudotuberculosis].                 | GCF_017498865.1 |
| WP_208133228.1 | TPR+GreAB-C+PIN*→                        | TPR+GreAB-C+PIN           | 1306 | -        | Bacteroidetes       | <i>Siccationidurans ginsengisoli</i>      | hypothetical protein [Siccationidurans ginsengisoli].               | GCF_017571525.1 |
| WP_208209475.1 | REase+TPR+GreAB-C+PIN*→                  | REase+TPR+GreAB-C+PIN     | 1543 | -        | Gammaproteobacteria | <i>Pseudomonas asiatica</i>               | hypothetical protein [Pseudomonas asiatica].                        | GCF_017582485.1 |
| WP_208467197.1 | TPR+PIN*→                                | TPR+PIN                   | 1140 | -        | Actinobacteria      | <i>Actinoplanes</i> sp. NEAU-H7           | hypothetical protein [Actinoplanes sp. NEAU-H7].                    | GCF_017592555.1 |
| WP_208622113.1 | HetE-N1→ TPR+GreAB-C+PIN*→               | TPR+GreAB-C+PIN           | 1022 | -        | Gammaproteobacteria | <i>Shewanella indica</i>                  | hypothetical protein, partial [Shewanella indica].                  | GCF_002836975.1 |
| WP_208660584.1 | HetE-N1→ TPR+GreAB-C+PIN*→               | TPR+GreAB-C+PIN           | 1087 | -        | Gammaproteobacteria | <i>Shewanella decolorationis</i>          | hypothetical protein [Shewanella decolorationis].                   | GCF_007923045.1 |
| WP_208757658.1 | TPR+PIN*→                                | TPR+PIN                   | 1184 | -        | Firmicutes          | <i>Priestia megaterium</i>                | hypothetical protein [Priestia megaterium].                         | GCF_002872495.1 |
| WP_209187630.1 | REase+TPR+GreAB-C+PIN→ PIN→              | REase+TPR+GreAB-C+PIN     | 359  | -        | Alphaproteobacteria | <i>Rhizobium</i> sp. L245/93              | hypothetical protein [Rhizobium sp. L245/93].                       | GCF_017741845.1 |
| WP_209187631.1 | -                                        | -                         | 978  | -        | Alphaproteobacteria | <i>Rhizobium</i> sp. L245/93              | hypothetical protein [Rhizobium sp. L245/93].                       | GCF_017741845.1 |
| WP_209302601.1 | X+PIN*→                                  | X+PIN                     | 1221 | -        | Firmicutes          | <i>Anaerostipes hadrus</i>                | hypothetical protein [Anaerostipes hadrus].                         | GCF_017776445.1 |
| WP_209570872.1 | TPR+GreAB-C+PIN*→?→   <-TPR              | TPR+GreAB-C+PIN           | 1131 | -        | Bacteroidetes       | <i>Flavobacterium</i> sp. 1750            | hypothetical protein [Flavobacterium sp. 1750].                     | GCF_017833855.1 |
| WP_209629149.1 | <-Calcineurin<-?  ?→?→ TPR+PIN*→         | TPR+PIN                   | 1016 | -        | Euryarchaeota       | <i>Methanofollis</i> sp. W23              | hypothetical protein [Methanofollis sp. W23].                       | GCF_017875325.1 |
| WP_209829315.1 | TPR+PIN*→                                | TPR+PIN                   | 1242 | -        | Actinobacteria      | <i>Cellulosimicrobium</i> sp. BE325       | hypothetical protein [Cellulosimicrobium sp. BE325].                | GCF_017834095.1 |
| WP_210277108.1 | REase+TPR+TPR+GreAB-C+PIN*→              | REase+TPR+TPR+GreAB-C+PIN | 1346 | -        | Alphaproteobacteria | <i>Rhizobium leguminosarum</i>            | hypothetical protein [Rhizobium leguminosarum].                     | GCF_014138515.1 |
| WP_210311799.1 | TPR+GreAB-C+PIN*→                        | TPR+GreAB-C+PIN           | 812  | -        | Alphaproteobacteria | <i>Rhizobium soli</i>                     | hypothetical protein, partial [Rhizobium soli].                     | GCF_014207075.1 |
| WP_210441888.1 | HetE-N1→ TPR+GreAB-C+PIN*→               | TPR+GreAB-C+PIN           | 1089 | -        | Gammaproteobacteria | <i>Vibrio crassostreae</i>                | hypothetical protein [Vibrio crassostreae].                         | GCF_017917835.1 |
| WP_210504843.1 | HetE-N1→ TPR+GreAB-C+PIN*→               | TPR+GreAB-C+PIN           | 1123 | -        | Gammaproteobacteria | <i>Pantoea ananatis</i>                   | hypothetical protein [Pantoea ananatis].                            | GCF_017920595.1 |

Gene neighborhoods and domain architectures of the novel STAND1 (nSTAND1) domain

| acc        | operon                                                                                        | architecture                          | len  | gen.name       | taxend                            | species                         | define                                                                               | gca             |
|------------|-----------------------------------------------------------------------------------------------|---------------------------------------|------|----------------|-----------------------------------|---------------------------------|--------------------------------------------------------------------------------------|-----------------|
| ABW16115.1 | <-ABhydrolase<-?<-TIR+CASPASE+APATPase+TPR+TPR  ?<-?  nSTAND1+BetaPropeller*→ TIR+EACC1+EAD1→ | nSTAND1+BetaPropeller                 | 1230 | Franean1_6781  | actinobacteria                    | Frankia sp. EAN1pec             | WD-40 repeat protein [Frankia sp. EAN1pec].                                          | GCA_000018005.1 |
| AMY09307.1 | <-ABhydrolase<-?<-?  ?→?→ SIG+TPR→ TIR+DrHyd→ nSTAND1+TM*→  <-?<-?<-?  ?→?→  <-?<-ABhydrolase | nSTAND1+TM                            | 884  | LuPra_02522    | acidobacteria                     | Luteitalea pratensis            | putative family GH19 chitinase [Luteitalea pratensis].                               | GCA_001618865.1 |
| AQZ62998.1 | nSTAND1+BetaPropeller*→?→?→ ParB→                                                             | nSTAND1+BetaPropeller                 | 1212 | BKM31_17390    | actinobacteria                    | Nonomurea sp. ATCC 55076        | hypothetical protein BKM31_17390 [Nonomurea sp. ATCC 55076].                         | GCA_002057455.1 |
| AUG75452.1 | <-ABhydrolase  ?→  <-?  ?→?→  <-?  EACC1→ CASPASE+nSTAND1+TM+BetaPropeller*→                  | CASPASE+nSTAND1+TM+BetaPropeller      | 1485 | CFP65_0489     | actinobacteria                    | Kitasatospora sp. MMS16-BH015   | hypothetical protein CFP65_0489 [Kitasatospora sp. MMS16-BH015].                     | GCA_002943525.1 |
| BAY12967.1 | EAD8+Trypsin→?→?→ MoxR→?→ VWA+nSTAND1*→                                                       | VWA+nSTAND1                           | 1139 | NIES2098_61590 | cyanobacteria                     | Calothrix sp. NIES-2098         | WD-40 repeat-containing protein [Calothrix sp. NIES-2098].                           | GCA_002368175.1 |
| BAY22501.1 | <-ACT  CASPASE+nSTAND1+BetaPropeller*→  <-?<-VWA+SidE  ?→ MNS→                                | CASPASE+nSTAND1+BetaPropeller         | 1839 | NIES2100_22640 | cyanobacteria                     | Calothrix sp. NIES-2100         | WD-40 repeat protein [Calothrix sp. NIES-2100].                                      | GCA_002368195.1 |
| BBD52759.1 | CASPASE+nSTAND1+TM+BetaPropeller*→                                                            | CASPASE+nSTAND1+TM+BetaPropeller      | 1514 | NIES204_00160  | cyanobacteria                     | Planktothrix agardhii NIES-204  | WD-40 repeat-containing protein [Planktothrix agardhii NIES-204].                    | GCA_003609755.1 |
| BBD65423.1 | nSTAND1+BetaPropeller*→ BetaPropeller→  <-?<-?<-?  ENOYCOADEHYD→                              | nSTAND1+BetaPropeller                 | 770  | NIES4070_17810 | cyanobacteria                     | Nostoc commune HK-02            | WD-40 repeat-containing protein [Nostoc commune HK-02].                              | GCA_003990685.1 |
| BBD65510.1 | Mbetalac→?→ Mbetalac→ CASPASE→ nSTAND1+BetaPropeller*→?→  <-?  ABC-ATPase→                    | nSTAND1+BetaPropeller                 | 1279 | NIES4070_18680 | cyanobacteria                     | Nostoc commune HK-02            | WD-40 repeat-containing protein [Nostoc commune HK-02].                              | GCA_003990685.1 |
| CEJ42488.1 | DinB_2+FGS→?→?→  <-?  nSTAND1+BetaPropeller*→                                                 | nSTAND1+BetaPropeller                 | 490  | apha_00274     | cyanobacteria                     | Chrysosporum ovalisporum        | WD-40 repeat protein [Chrysosporum ovalisporum].                                     | GCA_001458455.1 |
| EDM78150.1 | Pkinase+TPR→  <-?  Pkinase+TIR+nSTAND1+BetaPropeller+FGS*→                                    | Pkinase+TIR+nSTAND1+BetaPropeller+FGS | 1781 | PPSIR1_00415   | deltaproteobacteria               | Plesiocystis pacifica SIR-1     | peptidase C14, caspase catalytic subunit p20, partial [Plesiocystis pacifica SIR-1]. | GCA_000170895.1 |
| EDN71045.1 | nSTAND1+BetaPropeller*→                                                                       | nSTAND1+BetaPropeller                 | 1207 | BGP_1542       | gammaproteobacteria               | Beggiatoa sp. PS                | WD-40 repeat protein [Beggiatoa sp. PS].                                             | GCA_000170715.1 |
| ETX01284.1 | TIR+DrHyd→ nSTAND1+TM*→                                                                       | nSTAND1+TM                            | 561  | ETSY1_07910    | nitrospirinae/tectomicrobia group | Candidatus Entotheonella factor | hypothetical protein ETSY1_07910, partial [Candidatus Entotheonella factor].         | GCA_000522425.1 |

| acc        | operon                                                                                                                                    | architecture                               | len  | gen.name    | taxend                          | species                             | define                                                                          | gca             |
|------------|-------------------------------------------------------------------------------------------------------------------------------------------|--------------------------------------------|------|-------------|---------------------------------|-------------------------------------|---------------------------------------------------------------------------------|-----------------|
| ETX06250.1 | nSTAND1+TM+BetaPropeller*→                                                                                                                | nSTAND1+TM+BetaPropeller                   | 810  | ETSY2_18270 | nitrospinae/tectomicrobia group | Candidatus Entotheonella gemina     | hypothetical protein ETSY2_18270, partial [Candidatus Entotheonella gemina].    | GCA_000522445.1 |
| ETX08407.1 | TIR+DrHyd→ nSTAND1+TM+BetaPropeller+PDZ+BetaPropeller*→                                                                                   | nSTAND1+TM+BetaPropeller+PDZ+BetaPropeller | 1401 | ETSY2_05600 | nitrospinae/tectomicrobia group | Candidatus Entotheonella gemina     | hypothetical protein ETSY2_05600 [Candidatus Entotheonella gemina].             | GCA_000522445.1 |
| GAK58629.1 | SIG+TIR→ nSTAND1*→ nSTAND1+TM→                                                                                                            | nSTAND1                                    | 191  | U27_05603   | bacteria                        | Candidatus Vecturithrix granuli     | peptidase C14, caspase catalytic subunit p20 [Candidatus Vecturithrix granuli]. | GCA_000739535.1 |
| GCL34384.1 | nSTAND1+BetaPropeller+TPR*→ REC→                                                                                                          | nSTAND1+BetaPropeller+TPR                  | 1185 | PA905_35650 | cyanobacteria                   | Planktothrix agardhii CCAP 1459/11A | WD-40 repeat-containing protein [Planktothrix agardhii CCAP 1459/11A].          | GCA_005402765.2 |
| GES04627.1 | <-wHTH-4stranded+TPRs+APATPase+TPR+TPR+TPR  ?→?→  <-APATPase+TPR  EACC1→ CASPASE+nSTAND1+BetaPropeller*→?→  <-?  REC→?→  <-?<-ABhydrolase | CASPASE+nSTAND1+BetaPropeller              | 1472 | Acor_66950  | actinobacteria                  | Acrocarpospora corrugata            | hypothetical protein Acor_66950 [Acrocarpospora corrugata].                     | GCA_009687845.1 |
| GFJ81020.1 | <-REC  ?→?→?→?→  <-?  EACC1→ CASPASE+nSTAND1+TM+BetaPropeller*→?→  <-?<-?<-?<-?<-?  REC→                                                  | CASPASE+nSTAND1+TM+BetaPropeller           | 1373 | Phou_052000 | actinobacteria                  | Phytohabitans houttuyniae           | hypothetical protein Phou_052000 [Phytohabitans houttuyniae].                   | GCA_011764425.1 |
| HAA13664.1 | FAD-NAD-dep-oxidoreductase→?→ TIR+nSTAND1+TM+BetaPropeller*→                                                                              | TIR+nSTAND1+TM+BetaPropeller               | 1414 | DCE41_19005 | bacteroidetes                   | Cytophagales bacterium              | TPA: hypothetical protein DCE41_19005, partial [Cytophagales bacterium].        | GCA_003444355.1 |
| HAA18104.1 | <-ABhydrolase<-?<-?<-PSE<-?  TIR+DrHyd→ nSTAND1+TM+BetaPropeller*→                                                                        | nSTAND1+TM+BetaPropeller                   | 1014 | DCP28_04755 | bacteroidetes                   | Cytophagales bacterium              | TPA: hypothetical protein DCP28_04755 [Cytophagales bacterium].                 | GCA_003444325.1 |
| HAA22846.1 | TIR→ nSTAND1+TM+BetaPropeller*→                                                                                                           | nSTAND1+TM+BetaPropeller                   | 1115 | DCP28_30300 | bacteroidetes                   | Cytophagales bacterium              | TPA: hypothetical protein DCP28_30300 [Cytophagales bacterium].                 | GCA_003444325.1 |
| HAA23288.1 | <-SIG+Trypsin  BetaPropeller+ABhydrolase→  <-?<-?  NUDIX→ PSE→?→ TIR+DrHyd→ nSTAND1+TM+PspA+BetaPropeller*→                               | nSTAND1+TM+PspA+BetaPropeller              | 1043 | DCP28_32665 | bacteroidetes                   | Cytophagales bacterium              | TPA: hypothetical protein DCP28_32665 [Cytophagales bacterium].                 | GCA_003444325.1 |
| HAA50805.1 | Pkinase+TIR+DrHyd→ TIR+DrHyd→ nSTAND1+BetaPropeller*→                                                                                     | nSTAND1+BetaPropeller                      | 2457 | DCE43_13910 | planctomycetes                  | Planctomycetaceae bacterium         | TPA: hypothetical protein DCE43_13910 [Planctomycetaceae bacterium].            | GCA_003444155.1 |
| HAA60996.1 | Pkinase+TIR+DrHyd+TIR→ nSTAND1+BetaPropeller*→                                                                                            | nSTAND1+BetaPropeller                      | 1113 | DCE39_08695 | planctomycetes                  | Planctomycetaceae bacterium         | TPA: hypothetical protein DCE39_08695 [Planctomycetaceae bacterium].            | GCA_003444135.1 |
| HAB16129.1 | TIR+DrHyd→ nSTAND1+TM+BetaPropeller*→                                                                                                     | nSTAND1+TM+BetaPropeller                   | 1225 | DCE44_06740 | verrucomicrobia                 | Verrucomicrobiales bacterium        | TPA: hypothetical protein DCE44_06740, partial [Verrucomicrobiales bacterium].  | GCA_003445095.1 |
| HAB19453.1 | TIR+DrHyd→ nSTAND1*→?→  <-p450<-SIG+IES1                                                                                                  | nSTAND1                                    | 1272 | DCE44_23860 | verrucomicrobia                 | Verrucomicrobiales bacterium        | TPA: hypothetical protein DCE44_23860 [Verrucomicrobiales bacterium].           | GCA_003445095.1 |

| acc        | operon                                                                             | architecture                        | len  | gen.name    | taxend          | species                          | define                                                                                   | gca             |
|------------|------------------------------------------------------------------------------------|-------------------------------------|------|-------------|-----------------|----------------------------------|------------------------------------------------------------------------------------------|-----------------|
| HAB19519.1 | TIR+DrHyd→ nSTAND1+TM+BetaPropeller*→?→ Cluster515_2clades→                        | nSTAND1+TM+BetaPropeller            | 1398 | DCE44_24195 | verrucomicrobia | Verrucomicrobiales bacterium     | TPA: hypothetical protein DCE44_24195 [Verrucomicrobiales bacterium].                    | GCA_003445095.1 |
| HAC65097.1 | SIG+IES1+CBS→  <?-?<-?  ?→?→ nSTAND1+TM*→  <?-?<-?<-?<-?<-?  Redoxin→              | nSTAND1+TM                          | 781  | DCF68_16600 | cyanobacteria   | Cyanothece sp. UBA12306          | TPA: hypothetical protein DCF68_16600 [Cyanothece sp. UBA12306].                         | GCA_003448685.1 |
| HAE30915.1 | TIR+DrHyd→ nSTAND1+BetaPropeller*→                                                 | nSTAND1+BetaPropeller               | 1040 | DCF89_07360 | bacteroidetes   | Flavobacteriales bacterium       | TPA: hypothetical protein DCF89_07360 [Flavobacteriales bacterium].                      | GCA_003448535.1 |
| HAI83309.1 | TIR+DrHyd→ TIR+DrHyd→ nSTAND1+BetaPropeller*→                                      | nSTAND1+BetaPropeller               | 856  | DCL43_06560 | bacteroidetes   | Chitinophagaceae bacterium       | TPA: hypothetical protein DCL43_06560, partial [Chitinophagaceae bacterium].             | GCA_003450935.1 |
| HAN37555.1 | TIR→ nSTAND1+TM*→?→?→?→ Cluster106_3clades→                                        | nSTAND1+TM                          | 559  | DCQ29_01515 | bacteroidetes   | Chitinophagaceae bacterium       | TPA: hypothetical protein DCQ29_01515, partial [Chitinophagaceae bacterium].             | GCA_003456175.1 |
| HAP59714.1 | SIG+IES1→  <?-?<-?  PSE→?→ SIG+HISKIN+REC+AraC-HTH→ SIG+nSTAND1+TM+BetaPropeller*→ | SIG+nSTAND1+TM+BetaPropeller        | 1024 | DCR93_09475 | bacteroidetes   | Cytophagales bacterium           | TPA: hypothetical protein DCR93_09475 [Cytophagales bacterium].                          | GCA_003454975.1 |
| HAW02034.1 | TIR→ nSTAND1+TM*→                                                                  | nSTAND1+TM                          | 563  | DCX10_09905 | verrucomicrobia | Verrucomicrobiales bacterium     | TPA: hypothetical protein DCX10_09905, partial [Verrucomicrobiales bacterium].           | GCA_003543825.1 |
| HAW53197.1 | TIR+DrHyd→ nSTAND1+TM*→                                                            | nSTAND1+TM                          | 442  | DCX54_12865 | bacteroidetes   | Flavobacteriales bacterium       | TPA: High-affinity carbon uptake protein Hat/HatR, partial [Flavobacteriales bacterium]. | GCA_003487525.1 |
| HAX76296.1 | <-Trypco1  CASPACE+nSTAND1+TM*→ SIG+Pentapeptide→                                  | CASPACE+nSTAND1+TM                  | 797  | DCY88_10755 | cyanobacteria   | Cyanobacteria bacterium UBA11372 | TPA: hypothetical protein DCY88_10755, partial [Cyanobacteria bacterium UBA11372].       | GCA_003486675.1 |
| HAX87398.1 | CASPACE+nSTAND1+BetaPropeller*→                                                    | CASPACE+nSTAND1+BetaPropeller       | 1185 | DCY91_14325 | cyanobacteria   | Cyanobacteria bacterium UBA11370 | TPA: hypothetical protein DCY91_14325 [Cyanobacteria bacterium UBA11370].                | GCA_003486645.1 |
| HAZ02032.1 | TM+TM+TM+TM+TM+TM+TM+TM+TM+TM+TM+cNMP→?→ TIR+DrHyd→ nSTAND1+BetaPropeller*→        | nSTAND1+BetaPropeller               | 1055 | DCY97_07630 | bacteroidetes   | Marinilabiliales bacterium       | TPA: hypothetical protein DCY97_07630 [Marinilabiliales bacterium].                      | GCA_003485835.1 |
| HAZ49897.1 | EACC2+CASPACE+nSTAND1+BetaPropeller*→  <?-?<-?  SIG+TPR→ SIG+TPR→  <?-?  Uma2→     | EACC2+CASPACE+nSTAND1+BetaPropeller | 1758 | DCZ55_36965 | cyanobacteria   | Cyanobacteria bacterium UBA11371 | TPA: hypothetical protein DCZ55_36965 [Cyanobacteria bacterium UBA11371].                | GCA_003486305.1 |
| HBB96021.1 | nSTAND1+TM+BetaPropeller*→  <?-?<-?<-?<-?<-?<-Cluster533_2clades                   | nSTAND1+TM+BetaPropeller            | 1196 | DC054_11585 | acidobacteria   | Blastocatellia bacterium         | TPA: hypothetical protein DC054_11585 [Blastocatellia bacterium].                        | GCA_003487805.1 |
| HBE43600.1 | MORC→?→ AAA→ TM+TM+TM+TM+TM+TM+TM+TM+TM+TM+TM+cNMP→ nSTAND1+TM+BetaPropeller*→     | nSTAND1+TM+BetaPropeller            | 953  | DDW27_20875 | bacteroidetes   | Bacteroidales bacterium          | TPA: hypothetical protein DDW27_20875, partial [Bacteroidales bacterium].                | GCA_003501665.1 |

| acc        | operon                                                                                                                    | architecture                                         | len  | gen.name    | taxend              | species                           | define                                                                        | gca             |
|------------|---------------------------------------------------------------------------------------------------------------------------|------------------------------------------------------|------|-------------|---------------------|-----------------------------------|-------------------------------------------------------------------------------|-----------------|
| HBH24377.1 | TIR+DrHyd→ nSTAND1+BetaPropeller*→                                                                                        | nSTAND1+BetaPropeller                                | 1031 | DDY13_13250 | bacteroidetes       | Cytophagales bacterium            | TPA: hypothetical protein DDY13_13250 [Cytophagales bacterium].               | GCA_003500135.1 |
| HBK97025.1 | SIG+Trypsin+PDZ→?→ EACC2+CASPASE+nSTAND1+BetaPropeller*→?→?→?→?→  <-XisI                                                  | EACC2+CASPASE+nSTAND1+BetaPropeller                  | 1576 | DD001_06660 | cyanobacteria       | Microcoleaceae bacterium UBA10368 | TPA: hypothetical protein DD001_06660 [Microcoleaceae bacterium UBA10368].    | GCA_003506815.1 |
| HBL28746.1 | TIR+TIR→ nSTAND1+TIR+TM*→                                                                                                 | nSTAND1+TIR+TM                                       | 926  | DD490_18070 | acidobacteria       | Acidobacteria bacterium           | TPA: hypothetical protein DD490_18070 [Acidobacteria bacterium].              | GCA_003504885.1 |
| HBL30162.1 | TIR+DrHyd→ nSTAND1+TM+BetaPropeller*→?→?→ tRNA→?→?→ PSE→?→ AbiEii→                                                        | nSTAND1+TM+BetaPropeller                             | 1255 | DD490_25280 | acidobacteria       | Acidobacteria bacterium           | TPA: hypothetical protein DD490_25280 [Acidobacteria bacterium].              | GCA_003504885.1 |
| HBR00557.1 | nSTAND1*→?→  <-?<-?  GUN4→                                                                                                | nSTAND1                                              | 454  | DD761_18925 | cyanobacteria       | Cyanobacteria bacterium UBA11691  | TPA: hypothetical protein DD761_18925 [Cyanobacteria bacterium UBA11691].     | GCA_003535175.1 |
| HBY06929.1 | wHTH-4stranded+TPRs+Pkinase+nSTAND1+TM+BetaPropeller*→                                                                    | wHTH-4stranded+TPRs+Pkinase+nSTAND1+TM+BetaPropeller | 1319 | DEH22_03775 | chloroflexi         | Chloroflexi bacterium             | TPA: hypothetical protein DEH22_03775, partial [Chloroflexi bacterium].       | GCA_003512075.1 |
| HBY08818.1 | Pkinase+nSTAND1*→                                                                                                         | Pkinase+nSTAND1                                      | 633  | DEH22_13955 | chloroflexi         | Chloroflexi bacterium             | TPA: hypothetical protein DEH22_13955, partial [Chloroflexi bacterium].       | GCA_003512075.1 |
| HCA49859.1 | TIR+DrHyd→ nSTAND1+BetaPropeller+7TMR-DISMED1*→                                                                           | nSTAND1+BetaPropeller+7TMR-DISMED1                   | 1946 | DEP12_05575 | planctomycetes      | Planctomycetaceae bacterium       | TPA: hypothetical protein DEP12_05575, partial [Planctomycetaceae bacterium]. | GCA_003519945.1 |
| HCD01670.1 | Pkinase+TIR+DrHyd→ nSTAND1+BetaPropeller+TPR+TPR*→                                                                        | nSTAND1+BetaPropeller+TPR+TPR                        | 2680 | DER64_14220 | planctomycetes      | Planctomycetaceae bacterium       | TPA: hypothetical protein DER64_14220 [Planctomycetaceae bacterium].          | GCA_003517085.1 |
| HCM75174.1 | TM+TM+TM+TM+TM+TM+TM+TM+TM+TM+TM+cNMP→ TIR+DrHyd→ nSTAND1+TM+BetaPropeller*→                                              | nSTAND1+TM+BetaPropeller                             | 1054 | DIS90_02245 | bacteroidetes       | Cytophagales bacterium            | TPA: High-affinity carbon uptake protein Hat/HatR [Cytophagales bacterium].   | GCA_003535515.1 |
| HDN27296.1 | TIR+DrHyd→ nSTAND1+TM+BetaPropeller*→                                                                                     | nSTAND1+TM+BetaPropeller                             | 784  | ENG03_09425 | gammaproteobacteria | Thioploca sp.                     | TPA: hypothetical protein ENG03_09425, partial [Thioploca sp.].               | -               |
| HDV39880.1 | Pkinase+nSTAND1+TM*→  <-?<-?  ?→?→?→ REC→                                                                                 | Pkinase+nSTAND1+TM                                   | 922  | ENQ62_18990 | chloroflexi         | Chloroflexi bacterium             | TPA: serine/threonine protein kinase [Chloroflexi bacterium].                 | -               |
| HDX76165.1 | nSTAND1+TM+BetaPropeller*→                                                                                                | nSTAND1+TM+BetaPropeller                             | 810  | ENQ42_15745 | chloroflexi         | Chloroflexi bacterium             | TPA: hypothetical protein ENQ42_15745 [Chloroflexi bacterium].                | -               |
| HEB93882.1 | TIR+nSTAND1+BetaPropeller*→                                                                                               | TIR+nSTAND1+BetaPropeller                            | 1688 | ENI94_10555 | gammaproteobacteria | Gammaproteobacteria bacterium     | TPA: TIR domain-containing protein, partial [Gammaproteobacteria bacterium].  | -               |
| HEC44295.1 | MORC→?→ AAA→  <-?  TM+TM+TM+TM+TM+TM+TM+TM+TM+TM+TM+cNMP→?→ TIR+DrHyd→ SIG+nSTAND1+TM+BetaPropeller*→?→?→?→?→  <-Mbetalac | SIG+nSTAND1+TM+BetaPropeller                         | 1041 | ENI20_15845 | bacteroidetes       | Bacteroides sp.                   | TPA: hypothetical protein ENI20_15845 [Bacteroides sp.].                      | -               |

| acc          | operon                                                                                                                                                                     | architecture                                     | len  | gen.name    | taxend              | species                                 | define                                                                             | gca             |
|--------------|----------------------------------------------------------------------------------------------------------------------------------------------------------------------------|--------------------------------------------------|------|-------------|---------------------|-----------------------------------------|------------------------------------------------------------------------------------|-----------------|
| HEC84902.1   | Pkinase+nSTAND1*→                                                                                                                                                          | Pkinase+nSTAND1                                  | 801  | ENI48_06635 | gammaproteobacteria | Thioploca sp.                           | TPA: hypothetical protein ENI48_06635, partial [Thioploca sp.].                    | -               |
| HEP84957.1   | nSTAND1+TM+TPR*→?→ CASPASE→  <-SWACOS+TPR+TPR                                                                                                                              | nSTAND1+TM+TPR                                   | 1040 | ENQ97_01465 | chloroflexi         | Chloroflexi bacterium                   | TPA: ATP-binding protein [Chloroflexi bacterium].                                  | -               |
| HET82137.1   | SIG+nSTAND1+BetaPropeller*→                                                                                                                                                | SIG+nSTAND1+BetaPropeller                        | 1664 | ENQ84_03870 | chloroflexi         | Chloroflexi bacterium                   | TPA: hypothetical protein ENQ84_03870 [Chloroflexi bacterium].                     | -               |
| HEY47862.1   | SIG+LexA-HTH+LexA-protease→  <-?  tRNA→?→ tRNA→ tRNA→ wHTH-4stranded+TPRs+STYKIN+nSTAND1+BetaPropeller→ wHTH-4stranded+TPRs+STYKIN+nSTAND1+BetaPropeller*→ SWACOS+TPR+TPR→ | wHTH-4stranded+TPRs+STYKIN+nSTAND1+BetaPropeller | 1765 | G4O14_13900 | chloroflexi         | Anaerolineae bacterium                  | TPA: protein kinase [Anaerolineae bacterium].                                      | GCA_011174825.1 |
| HFG28088.1   | TIR+DrHyd→ nSTAND1+BetaPropeller*→  <-?<-?<-?  TM→?→?→ Cluster157_3clades→                                                                                                 | nSTAND1+BetaPropeller                            | 1281 | ENS73_14620 | verrucomicrobia     | Verrucomicrobia subdivision 3 bacterium | TPA: hypothetical protein ENS73_14620 [Verrucomicrobia subdivision 3 bacterium].   | -               |
| HFk76611.1   | TCAD9+Pkinase+nSTAND1+TM+BetaPropeller*→                                                                                                                                   | TCAD9+Pkinase+nSTAND1+TM+BetaPropeller           | 1386 | ENR96_14405 | chloroflexi         | Anaerolineae bacterium                  | TPA: hypothetical protein ENR96_14405, partial [Anaerolineae bacterium].           | -               |
| HFN01514.1   | CASPASE+nSTAND1+BetaPropeller*→                                                                                                                                            | CASPASE+nSTAND1+BetaPropeller                    | 1643 | ENR64_27960 | cyanobacteria       | Oscillatoriales cyanobacterium SpSt-418 | TPA: hypothetical protein ENR64_27960 [Oscillatoriales cyanobacterium SpSt-418].   | -               |
| HGT17894.1   | SIG+Pentapeptide→  <-?  PSE→?→?→ MED15→?→ CASPASE+nSTAND1+TM+BetaPropeller*→                                                                                               | CASPASE+nSTAND1+TM+BetaPropeller                 | 1526 | ENT48_13530 | chloroflexi         | Chloroflexi bacterium                   | TPA: CHAT domain-containing protein [Chloroflexi bacterium].                       | -               |
| HGV41566.1   | HxxxH→?→?→ Cluster515_2clades→?→  <-?  SIG+Trypsin→ SIG+TM+nSTAND1+TM+BetaPropeller*→?→?→ nSTAND1+TM+Tox-ODYAM1+BetaPropeller→                                             | SIG+TM+nSTAND1+TM+BetaPropeller                  | 1587 | ENT18_00225 | chloroflexi         | Chloroflexi bacterium                   | TPA: hypothetical protein ENT18_00225 [Chloroflexi bacterium].                     | -               |
| HGX16402.1   | HTH+Pkinase+nSTAND1+TM+BetaPropeller*→                                                                                                                                     | HTH+Pkinase+nSTAND1+TM+BetaPropeller             | 1240 | ENR56_13340 | chloroflexi         | Anaerolineae bacterium                  | TPA: helix-turn-helix domain-containing protein, partial [Anaerolineae bacterium]. | -               |
| HIG27385.1   | nSTAND1+BetaPropeller+SUN+TPR*→                                                                                                                                            | nSTAND1+BetaPropeller+SUN+TPR                    | 1629 | EYQ50_06160 | verrucomicrobia     | Verrucomicrobiales bacterium            | TPA: hypothetical protein EYQ50_06160 [Verrucomicrobiales bacterium].              | -               |
| HIG31009.1   | nSTAND1+TM*→                                                                                                                                                               | nSTAND1+TM                                       | 482  | EYQ50_25695 | verrucomicrobia     | Verrucomicrobiales bacterium            | TPA: ATP-binding protein, partial [Verrucomicrobiales bacterium].                  | -               |
| HIG83463.1   | TIR+DrHyd→ nSTAND1+TM+BetaPropeller*→                                                                                                                                      | nSTAND1+TM+BetaPropeller                         | 938  | EYQ23_05285 | verrucomicrobia     | Verrucomicrobiales bacterium            | TPA: hypothetical protein EYQ23_05285, partial [Verrucomicrobiales bacterium].     | -               |
| KAA0256025.1 | <-REC+NtrC-AAA+FIS-HTH<-?<-?<-ABC-ATPase  TIR+DrHyd→ nSTAND1+BetaPropeller*→?→ TM+TM+TM+TM+TM+TM+TM+TM+TM+TM+cNMP→ TM+TM+TM+TM+TM+TM+TM+TM+TM+TM+cNMP→?→?→  <-SIG+IES1     | nSTAND1+BetaPropeller                            | 1035 | EDX89_02880 | acidobacteria       | Acidobacteria bacterium                 | hypothetical protein EDX89_02880 [Acidobacteria bacterium].                        | -               |
| KAA3662250.1 | <-HAD  ?→ EAD7+nSTAND1+TM+FGS*→                                                                                                                                            | EAD7+nSTAND1+TM+FGS                              | 781  | DWQ04_13990 | chloroflexi         | Chloroflexi bacterium                   | hypothetical protein DWQ04_13990, partial [Chloroflexi bacterium].                 | -               |
| KAB2902286.1 | Pkinase+nSTAND1+TM+EP1*→                                                                                                                                                   | Pkinase+nSTAND1+TM+EP1                           | 937  | F9K40_07755 | deltaproteobacteria | Koferiaceae bacterium                   | protein kinase [Koferiaceae bacterium].                                            | -               |

| acc        | operon                                                                                    | architecture                                              | len  | gen.name          | taxend              | species                                 | define                                                                                   | gca             |
|------------|-------------------------------------------------------------------------------------------|-----------------------------------------------------------|------|-------------------|---------------------|-----------------------------------------|------------------------------------------------------------------------------------------|-----------------|
| KEI67755.1 | CASPASE→ nSTAND1+BetaPropeller*→ REC→                                                     | nSTAND1+BetaPropeller                                     | 1315 | A19Y_2900         | cyanobacteria       | Planktothrix agardhii<br>NIVA-CYA 126/8 | putative WD40<br>repeat-containing protein<br>[Planktothrix agardhii<br>NIVA-CYA 126/8]. | GCA_000710505.1 |
| KKD36164.1 | nSTAND1+BetaPropeller*→                                                                   | nSTAND1+BetaPropeller                                     | 1221 | WN50_21290        | cyanobacteria       | Limnoraphis robusta<br>CS-951           | peptidase C14<br>[Limnoraphis robusta<br>CS-951].                                        | GCA_000972705.2 |
| KKO17953.1 | TIR→ SIG+nSTAND1+TM+BetaPropeller*→ BetaPropeller→                                        | SIG+nSTAND1+TM+BetaPropeller                              | 1179 | BROFUL_03361      | planctomycetes      | Candidatus Brocadia<br>fulgida          | hypothetical protein<br>BROFUL_03361<br>[Candidatus Brocadia<br>fulgida].                | GCA_000987375.1 |
| KOX34481.1 | nSTAND1+TM+BetaPropeller*→                                                                | nSTAND1+TM+BetaPropeller                                  | 1229 | ADK67_03315       | actinobacteria      | Saccharothrix sp. NRRL<br>B-16348       | hypothetical protein<br>ADK67_03315<br>[Saccharothrix sp. NRRL<br>B-16348].              | GCA_001280085.1 |
| KPA09462.1 | TIR→ nSTAND1+CarboxypepD-reg-IG+FGS*→                                                     | nSTAND1+CarboxypepD-reg-IG+FGS                            | 1095 | MHK_010294        | deltaproteobacteria | Candidatus<br>Magnetomorum sp. HK-1     | Sulphatase-modifying<br>factor domain protein<br>[Candidatus<br>Magnetomorum sp. HK-1].  | GCA_001292585.1 |
| KPA09563.1 | TIR+DrHyd→ nSTAND1+BetaPropeller*→                                                        | nSTAND1+BetaPropeller                                     | 1143 | MHK_010235        | deltaproteobacteria | Candidatus<br>Magnetomorum sp. HK-1     | repeat-containing protein<br>[Candidatus<br>Magnetomorum sp. HK-1].                      | GCA_001292585.1 |
| KPK06025.1 | Pkinase+LuxR-HTH+nSTAND1+BetaPropeller*→                                                  | Pkinase+LuxR-<br>HTH+nSTAND1+BetaPropeller                | 1617 | AMJ56_15120       | chloroflexi         | Anaerolineae bacterium<br>SGS_19        | hypothetical protein<br>AMJ56_15120<br>[Anaerolineae bacterium<br>SGS_19].               | GCA_001303105.1 |
| KPK11168.1 | wHTH-4stranded+TPRs+nSTAND1+TM+BetaPropeller*→                                            | wHTH-<br>4stranded+TPRs+nSTAND1+TM+BetaPro-<br>peller     | 1833 | AMJ56_06610       | chloroflexi         | Anaerolineae bacterium<br>SGS_19        | hypothetical protein<br>AMJ56_06610<br>[Anaerolineae bacterium<br>SGS_19].               | GCA_001303105.1 |
| KPK13148.1 | wHTH-4stranded+TPRs+nSTAND1+TM+BetaPropeller*→                                            | wHTH-<br>4stranded+TPRs+nSTAND1+TM+BetaPro-<br>peller     | 1822 | AMJ56_03150       | chloroflexi         | Anaerolineae bacterium<br>SGS_19        | hypothetical protein<br>AMJ56_03150<br>[Anaerolineae bacterium<br>SGS_19].               | GCA_001303105.1 |
| KPK92042.1 | nSTAND1+BetaPropeller→ wHTH-4stranded+TPRs+STYKIN+nSTAND1+BetaPropeller*→ SWACOS+TPR+TPR→ | wHTH-<br>4stranded+TPRs+STYKIN+nSTAND1+Be-<br>taPropeller | 1764 | AMJ88_11890       | chloroflexi         | Anaerolineae bacterium<br>SM23_63       | hypothetical protein<br>AMJ88_11890<br>[Anaerolineae bacterium<br>SM23_63].              | GCA_001303965.1 |
| KPL74836.1 | TIR+nSTAND1+BetaPropeller*→?→?→ SIG+ApbE→                                                 | TIR+nSTAND1+BetaPropeller                                 | 1565 | ADN00_13440       | chloroflexi         | Ornatilinea apprima                     | hypothetical protein<br>ADN00_13440 [Ornatilinea<br>apprima].                            | GCA_001306115.1 |
| KPQ33209.1 | CASPASE+CASPASE+nSTAND1+BetaPropeller*→  <-?<-?<-?<-?<-?  Pkinase+SWACOS→                 | CASPASE+CASPASE+nSTAND1+BetaPro-<br>peller                | 1796 | HLUCCA11_19215    | cyanobacteria       | Phormidesmis priestleyi<br>Ana          | WD-40 repeat-containing<br>protein [Phormidesmis<br>priestleyi Ana].                     | GCA_001314865.1 |
| KWW98255.1 | Cluster157_3clades→?→  <-?  CASPASE+nSTAND1+TM+BetaPropeller*→                            | CASPASE+nSTAND1+TM+BetaPropeller                          | 1514 | TH66_19845        | actinobacteria      | Streptomyces<br>thermoautotrophicus     | hypothetical protein<br>TH66_19845 [Streptomyces<br>thermoautotrophicus].                | GCA_001543895.1 |
| KXX14067.1 | <-SIG+TPR<-?  Pkinase+LuxR-HTH+nSTAND1+BetaPropeller*→                                    | Pkinase+LuxR-<br>HTH+nSTAND1+BetaPropeller                | 1564 | UZ15_CFX003003150 | chloroflexi         | Chloroflexi bacterium<br>OLB15          | domain-containing protein<br>[Chloroflexi bacterium<br>OLB15].                           | GCA_001567085.1 |

| acc        | operon                                                                                                                                                  | architecture                                | len  | gen.name          | taxend          | species                       | define                                                                   | gca             |
|------------|---------------------------------------------------------------------------------------------------------------------------------------------------------|---------------------------------------------|------|-------------------|-----------------|-------------------------------|--------------------------------------------------------------------------|-----------------|
| KXK22484.1 | Pkinase+LuxR-HTH+nSTAND1+BetaPropeller*→ SIG+TPR→  <-tRNA<-?<-?<-?<-?  ?→ STYKIN→                                                                       | Pkinase+LuxR-HTH+nSTAND1+BetaPropeller      | 1598 | UZ15_CFX003001056 | chloroflexi     | Chloroflexi bacterium OLB15   | WD-40 repeat-containing protein, partial [Chloroflexi bacterium OLB15].  | GCA_001567085.1 |
| KXK24442.1 | TM+TM+TM+TM+TM+TM+TM+TM+TM+TM+TM+cNMP→  <-?  ?→ TIR+DrHyd→ nSTAND1+TM+BetaPropeller*→?→?→?→?→?→ ABhydrolase→                                            | nSTAND1+TM+BetaPropeller                    | 1066 | UZ12_BCD005001992 | bacteroidetes   | Bacteroidetes bacterium OLB12 | WD-40 repeat-containing protein [Bacteroidetes bacterium OLB12].         | GCA_001567185.1 |
| MAJ16671.1 | <-SIG+BetaPropeller<-?<-?<-?  ?→ TIR+DrHyd→ nSTAND1+BetaPropeller*→ SIG+IES1→                                                                           | nSTAND1+BetaPropeller                       | 1469 | CMO51_06400       | verrucomicrobia | Verrucomicrobiales bacterium  | hypothetical protein CMO51_06400 [Verrucomicrobiales bacterium].         | GCA_002691505.1 |
| MAM90836.1 | TIR+DrHyd→ nSTAND1+TM+BetaPropeller*→                                                                                                                   | nSTAND1+TM+BetaPropeller                    | 1106 | CMI15_05100       | verrucomicrobia | Opiritaceae bacterium         | hypothetical protein CMI15_05100, partial [Opiritaceae bacterium].       | GCA_002694885.1 |
| MAR12587.1 | Pkinase+TIR+DrHyd→ nSTAND1+ANK*→  <-?<-?<-?<-?<-?<-SIG+BetaPropeller                                                                                    | nSTAND1+ANK                                 | 1675 | CL681_21775       | planctomycetes  | Blastopirellula sp.           | hypothetical protein CL681_21775 [Blastopirellula sp.].                  | GCA_002701545.1 |
| MAT97242.1 | REC→?→?→?→?→  <-TM  ?→ HTH+Pkinase+nSTAND1+TM+BetaPropeller*→                                                                                           | HTH+Pkinase+nSTAND1+TM+BetaPropeller        | 1592 | CL608_08880       | chloroflexi     | Anaerolineaceae bacterium     | hypothetical protein CL608_08880 [Anaerolineaceae bacterium].            | GCA_002699125.1 |
| MAU11726.1 | <-Uma2  ?→?→  <-?  Pkinase+LuxR-HTH+nSTAND1*→                                                                                                           | Pkinase+LuxR-HTH+nSTAND1                    | 757  | CL607_18015       | chloroflexi     | Anaerolineaceae bacterium     | hypothetical protein CL607_18015, partial [Anaerolineaceae bacterium].   | GCA_002699585.1 |
| MAU12933.1 | SIG+ABhydrolase→?→ ABC-ATPase→?→?→ PSE→  <-PSE  Pkinase+LuxR-HTH+nSTAND1+BetaPropeller*→ SIG+ABhydrolase→  <-?<-REC<-SIG+HISKIN+REC+AraC-HTH  ?→  <-REC | Pkinase+LuxR-HTH+nSTAND1+BetaPropeller      | 1592 | CL607_24150       | chloroflexi     | Anaerolineaceae bacterium     | hypothetical protein CL607_24150 [Anaerolineaceae bacterium].            | GCA_002699585.1 |
| MAV38177.1 | Pkinase+TIR+DrHyd+TIR→ nSTAND1+TM+BetaPropeller*→                                                                                                       | nSTAND1+TM+BetaPropeller                    | 1393 | CMJ59_22285       | planctomycetes  | Planctomycetaceae bacterium   | hypothetical protein CMJ59_22285, partial [Planctomycetaceae bacterium]. | GCA_002702965.1 |
| MBB75929.1 | Pkinase→ nSTAND1+BetaPropeller+TPR+TPR*→                                                                                                                | nSTAND1+BetaPropeller+TPR+TPR               | 2720 | CMJ75_15595       | planctomycetes  | Planctomycetaceae bacterium   | hypothetical protein CMJ75_15595 [Planctomycetaceae bacterium].          | GCA_002709225.1 |
| MBE75923.1 | <-SIG+BetaPropeller  ?→  <-?<-?<-?<-?  Pkinase+TIR+DrHyd+TIR→ nSTAND1+BetaPropeller+7TMR-DISMED1*→                                                      | nSTAND1+BetaPropeller+7TMR-DISMED1          | 2375 | CMM04_16030       | planctomycetes  | Rhodopirellula sp.            | hypothetical protein CMM04_16030 [Rhodopirellula sp.].                   | GCA_002714565.1 |
| MBH57175.1 | Pkinase+TIR+DrHyd→ nSTAND1+ANK*→  <-?<-?  SIG+BetaPropeller→  <-SIG+BetaPropeller                                                                       | nSTAND1+ANK                                 | 1672 | CMJ82_08335       | planctomycetes  | Planctomycetaceae bacterium   | hypothetical protein CMJ82_08335 [Planctomycetaceae bacterium].          | GCA_002717145.1 |
| MBL58930.1 | TIR+DrHyd→ nSTAND1+BetaPropeller+TPR*→  <-?<-ABC-ATPase                                                                                                 | nSTAND1+BetaPropeller+TPR                   | 1457 | CMO75_04590       | verrucomicrobia | Verrucomicrobiales bacterium  | hypothetical protein CMO75_04590 [Verrucomicrobiales bacterium].         | GCA_002721375.1 |
| MBL59292.1 | ABC-ATPase→ REC→?→?→  <-?  ?→ TIR+DrHyd→ nSTAND1+BetaPropeller+BetaPropeller+TPR+TPR*→  <-?<-?<-SIG+BetaPropeller                                       | nSTAND1+BetaPropeller+BetaPropeller+TPR+TPR | 2167 | CMO75_06445       | verrucomicrobia | Verrucomicrobiales bacterium  | hypothetical protein CMO75_06445 [Verrucomicrobiales bacterium].         | GCA_002721375.1 |

| acc        | operon                                                                                                         | architecture                           | len  | gen.name    | taxend              | species                        | define                                                                    | gca             |
|------------|----------------------------------------------------------------------------------------------------------------|----------------------------------------|------|-------------|---------------------|--------------------------------|---------------------------------------------------------------------------|-----------------|
| MBL59695.1 | <-ABhydrolase<-?<-?  TIR+DrHyd→ nSTAND1+BetaPropeller*→                                                        | nSTAND1+BetaPropeller                  | 1446 | CMO75_08500 | verrucomicrobia     | Verrucomicrobiales bacterium   | hypothetical protein CMO75_08500 [Verrucomicrobiales bacterium].          | GCA_002721375.1 |
| MBO11083.1 | Pkinase+DrHyd→ SIG+nSTAND1+BetaPropeller+TPR*→                                                                 | SIG+nSTAND1+BetaPropeller+TPR          | 2094 | CMJ68_09995 | planctomycetes      | Planctomycetaceae bacterium    | hypothetical protein CMJ68_09995 [Planctomycetaceae bacterium].           | GCA_002724415.1 |
| MBO89933.1 | TIR+DrHyd→ nSTAND1+TM+BetaPropeller*→                                                                          | nSTAND1+TM+BetaPropeller               | 1371 | CMP14_10460 | alphaproteobacteria | Rickettsiales bacterium        | hypothetical protein CMP14_10460, partial [Rickettsiales bacterium].      | GCA_002724555.1 |
| MBT32320.1 | TM+TM+TM+TM+TM+TM+TM+TM+TM+TM+TM+cNMP→ TIR→ nSTAND1+BetaPropeller*→                                            | nSTAND1+BetaPropeller                  | 783  | CMO01_21870 | alphaproteobacteria | Thalassobius sp.               | hypothetical protein CMO01_21870, partial [Thalassobius sp.].             | GCA_002729595.1 |
| MBV59171.1 | TIR+DrHyd→ nSTAND1+BetaPropeller*→                                                                             | nSTAND1+BetaPropeller                  | 966  | CMO58_06170 | verrucomicrobia     | Verrucomicrobiales bacterium   | hypothetical protein CMO58_06170, partial [Verrucomicrobiales bacterium]. | GCA_002731855.1 |
| MRR18651.1 | AAA+TPR→?→ SIG+TM→ MORC→?→ AAA→?→ nSTAND1+TM+BetaPropeller*→?→?→?→  <-SIG+IES1+CBS<-?<-?<-SIG+TPR              | nSTAND1+TM+BetaPropeller               | 1007 | EG827_00520 | bacteria            | bacterium                      | hypothetical protein EG827_00520 [bacterium].                             | GCA_009668865.1 |
| MSR57801.1 | Pkinase→ TIR→ TIR+DrHyd→ nSTAND1+BetaPropeller+PDZ*→                                                           | nSTAND1+BetaPropeller+PDZ              | 1868 | EXS05_09020 | planctomycetes      | Planctomycetaceae bacterium    | PDZ domain-containing protein [Planctomycetaceae bacterium].              | GCA_009691905.1 |
| MSV29424.1 | <-SIG+Metallopeptidase  TPR→?→ nSTAND1+TM+BetaPropeller*→ SIG+BetaPropeller→                                   | nSTAND1+TM+BetaPropeller               | 957  | EXQ52_11895 | acidobacteria       | Bryobacterales bacterium       | hypothetical protein EXQ52_11895 [Bryobacterales bacterium].              | GCA_009697455.1 |
| MSV29798.1 | TIR→ nSTAND1+FGS*→                                                                                             | nSTAND1+FGS                            | 844  | EXQ52_13790 | acidobacteria       | Bryobacterales bacterium       | hypothetical protein EXQ52_13790 [Bryobacterales bacterium].              | GCA_009697455.1 |
| MZQ49612.1 | nSTAND1+TM+BetaPropeller*→                                                                                     | nSTAND1+TM+BetaPropeller               | 1023 | GT598_11475 | bacteroidetes       | Bacteroidales bacterium        | hypothetical protein GT598_11475 [Bacteroidales bacterium].               | -               |
| NBC83322.1 | MORC→?→ AAA→  <-?  TM+TM+TM+TM+TM+TM+TM+TM+TM+TM+TM+cNMP→ TIR+DrHyd→ nSTAND1+BetaPropeller*→                   | nSTAND1+BetaPropeller                  | 1023 | GVY19_08055 | bacteroidetes       | Bacteroidetes bacterium        | hypothetical protein GVY19_08055 [Bacteroidetes bacterium].               | -               |
| NBQ24983.1 | TIR→ TIR+DrHyd→ nSTAND1+BetaPropeller+BetaPropeller*→                                                          | nSTAND1+BetaPropeller+BetaPropeller    | 1109 | EBU26_12125 | verrucomicrobia     | Verrucomicrobia bacterium      | hypothetical protein EBU26_12125, partial [Verrucomicrobia bacterium].    | GCA_009920095.1 |
| NBW34856.1 | SIG+HISKIN+REC+AraC-HTH→?→?→ SIG+ASH-IG→?→?→ TM+TM+TM+TM+TM+TM+TM+TM+TM+TM+TM+cNMP→ nSTAND1+TM+BetaPropeller*→ | nSTAND1+TM+BetaPropeller               | 1061 | EBR30_07525 | bacteroidetes       | Cytophagia bacterium           | hypothetical protein EBR30_07525 [Cytophagia bacterium].                  | -               |
| NCF64926.1 | Pkinase+LuxR-HTH+nSTAND1+BetaPropeller*→ BetaPropeller→?→  <-?<-?<-?<-ABhydrolase                              | Pkinase+LuxR-HTH+nSTAND1+BetaPropeller | 1614 | GWP61_03065 | chloroflexi         | Chloroflexi bacterium          | protein kinase [Chloroflexi bacterium].                                   | -               |
| NCF85778.1 | TIR+DrHyd→ nSTAND1+TM+BetaPropeller*→?→?→  <-?  ABhydrolase→                                                   | nSTAND1+TM+BetaPropeller               | 1368 | GWQ08_09620 | verrucomicrobia     | Verrucomicrobiaceae bacterium  | hypothetical protein GWQ08_09620 [Verrucomicrobiaceae bacterium].         | -               |
| NCR43132.1 | CASPASE+nSTAND1+TM+BetaPropeller*→                                                                             | CASPASE+nSTAND1+TM+BetaPropeller       | 1425 | GPJ09_01855 | cyanobacteria       | Microcystis aeruginosa SX13-01 | hypothetical protein GPJ09_01855 [Microcystis aeruginosa SX13-01].        | -               |

| acc        | operon                                                                                                   | architecture                                 | len  | gen.name    | taxend        | species                       | define                                                                      | gca |
|------------|----------------------------------------------------------------------------------------------------------|----------------------------------------------|------|-------------|---------------|-------------------------------|-----------------------------------------------------------------------------|-----|
| NCS30183.1 | <-Trypco1  CASPASe+nSTAND1+FGS*→                                                                         | CASPASe+nSTAND1+FGS                          | 1065 | GPJ18_17185 | cyanobacteria | Microcystis aeruginosa F13-15 | SUMF1/EgtB/PvdO family nonheme iron enzyme [Microcystis aeruginosa F13-15]. | -   |
| NDE10486.1 | TIR+TIR→ nSTAND1+BetaPropeller*→                                                                         | nSTAND1+BetaPropeller                        | 1021 | EBZ95_07970 | bacteroidetes | Chitinophagia bacterium       | hypothetical protein EBZ95_07970 [Chitinophagia bacterium].                 | -   |
| NDJ26297.1 | nSTAND1+TM*→                                                                                             | nSTAND1+TM                                   | 850  | GS682_33040 | cyanobacteria | Nostoc sp. B(2019)            | hypothetical protein GS682_33040, partial [Nostoc sp. B(2019)].             | -   |
| NDJ53782.1 | wHTH-4stranded+TPRs+nSTAND1+TM+BetaPropeller*→                                                           | wHTH-4stranded+TPRs+nSTAND1+TM+BetaPropeller | 1239 | GYB68_11940 | chloroflexi   | Chloroflexi bacterium         | hypothetical protein GYB68_11940 [Chloroflexi bacterium].                   | -   |
| NDJ62327.1 | Pkinase+nSTAND1+TM+BetaPropeller*→                                                                       | Pkinase+nSTAND1+TM+BetaPropeller             | 1217 | GYB67_14465 | chloroflexi   | Chloroflexi bacterium         | protein kinase, partial [Chloroflexi bacterium].                            | -   |
| NDJ75022.1 | <-SIG+ABhydrolase<-?  Pkinase+LuxR-HTH+nSTAND1+BetaPropeller*→                                           | Pkinase+LuxR-HTH+nSTAND1+BetaPropeller       | 1613 | GYB65_02080 | chloroflexi   | Chloroflexi bacterium         | protein kinase [Chloroflexi bacterium].                                     | -   |
| NDJ75955.1 | <-REC  ?→?→  <-?<-SIG+ABhydrolase  Pkinase+LuxR-HTH+nSTAND1+BetaPropeller*→ ROK-HTH→ SIG+TM+TM+TM+TM+TM→ | Pkinase+LuxR-HTH+nSTAND1+BetaPropeller       | 1599 | GYB65_06825 | chloroflexi   | Chloroflexi bacterium         | protein kinase [Chloroflexi bacterium].                                     | -   |
| NDJ77885.1 | SIG+TM+TM+TM+TM+TM→ Pkinase+nSTAND1+BetaPropeller*→                                                      | Pkinase+nSTAND1+BetaPropeller                | 1485 | GYB65_16675 | chloroflexi   | Chloroflexi bacterium         | protein kinase [Chloroflexi bacterium].                                     | -   |
| NDJ85618.1 | REC→?→ Pkinase+nSTAND1+BetaPropeller*→  <-VWA+FHA  ?→?→  <-ABC-ATPase                                    | Pkinase+nSTAND1+BetaPropeller                | 1487 | GYB66_07010 | chloroflexi   | Chloroflexi bacterium         | protein kinase [Chloroflexi bacterium].                                     | -   |
| NDQ57070.1 | ROK-HTH→?→ ABhydrolase→ TIR+DrHyd→ nSTAND1+TPR*→?→  <-?<-?<-?<-?  SIG+VIT+VWA+TM→                        | nSTAND1+TPR                                  | 939  | GZ088_08360 | acidobacteria | Acidipila sp.                 | tetratricopeptide repeat protein [Acidipila sp.].                           | -   |
| NEO05953.1 | <-Cluster59_2clades  APATPase+BetaPropeller→?→  <-?<-?  PSE→ nSTAND1+BetaPropeller+TPR*→                 | nSTAND1+BetaPropeller+TPR                    | 1521 | F6K51_10425 | cyanobacteria | Moorea sp. SIO318             | hypothetical protein F6K51_10425 [Moorea sp. SIO318].                       | -   |
| NEO22392.1 | APATPase+BetaPropeller→?→  <-?<-?  PSE→ nSTAND1+TM+BetaPropeller+TPR*→ Cluster59_2clades→                | nSTAND1+TM+BetaPropeller+TPR                 | 1415 | F6K57_24570 | cyanobacteria | Moorea sp. SIO4A5             | hypothetical protein F6K57_24570 [Moorea sp. SIO4A5].                       | -   |
| NEO24022.1 | Trypsin+nSTAND1+BetaPropeller*→                                                                          | Trypsin+nSTAND1+BetaPropeller                | 1347 | F6K57_33355 | cyanobacteria | Moorea sp. SIO4A5             | hypothetical protein F6K57_33355 [Moorea sp. SIO4A5].                       | -   |
| NEO40588.1 | RVT→ RVT→ RVT→ PSE→ PSE→?→  <-?  ?→?→ nSTAND1*→ BetaPropeller→                                           | nSTAND1                                      | 417  | F6J90_31350 | cyanobacteria | Moorea sp. SIOASIH            | hypothetical protein F6J90_31350 [Moorea sp. SIOASIH].                      | -   |
| NEO55095.1 | <-SUA  ?→ nSTAND1+BetaPropeller+TPR*→                                                                    | nSTAND1+BetaPropeller+TPR                    | 1462 | F6K54_19650 | cyanobacteria | Okeania sp. SIO3B5            | WD40 repeat domain-containing protein [Okeania sp. SIO3B5].                 | -   |
| NEO77038.1 | EACC2+CASPASe+nSTAND1+BetaPropeller*→                                                                    | EACC2+CASPASe+nSTAND1+BetaPropeller          | 1208 | F6J99_12650 | cyanobacteria | Moorea sp. SIO4G3             | CHAT domain-containing protein, partial [Moorea sp. SIO4G3].                | -   |
| NEO88965.1 | Pentapeptide→ CASPASe→ nSTAND1+BetaPropeller*→                                                           | nSTAND1+BetaPropeller                        | 1295 | F6K56_01245 | cyanobacteria | Moorea sp. SIO3G5             | hypothetical protein F6K56_01245 [Moorea sp. SIO3G5].                       | -   |
| NEO95082.1 | Trypsin+nSTAND1+ThuA-GATase*→                                                                            | Trypsin+nSTAND1+ThuA-GATase                  | 909  | F6K56_34765 | cyanobacteria | Moorea sp. SIO3G5             | trypsin-like serine protease [Moorea sp. SIO3G5].                           | -   |
| NEP00479.1 | <-PKinase+SWACOS+GAF+SHELIX+HISKIN+REC<-?<-?<-TPR+TPR<-?<-MNS  ?→ nSTAND1+*→                             | nSTAND1+                                     | 776  | F6K58_17710 | cyanobacteria | Symploca sp. SIO2E9           | hypothetical protein F6K58_17710 [Symploca sp. SIO2E9].                     | -   |

| acc        | operon                                                                                                     | architecture                     | len  | gen.name    | taxend        | species                 | define                                                          | gca |
|------------|------------------------------------------------------------------------------------------------------------|----------------------------------|------|-------------|---------------|-------------------------|-----------------------------------------------------------------|-----|
| NEP10746.1 | <-Cluster108_2clades  ?→ PKinase+SWACOS+GAF+SHELIX+HISKIN+REC→?→?→?→  <-Trypco1  CASPASe+nSTAND1+TM+GUN4*→ | CASPASe+nSTAND1+TM+GUN4          | 1012 | F6K14_11125 | cyanobacteria | Symploca sp. SIO2C1     | hypothetical protein F6K14_11125 [Symploca sp. SIO2C1].         | -   |
| NEP16657.1 | ABhydrolase→?→?→?→  <-?  CASPASe+nSTAND1*→                                                                 | CASPASe+nSTAND1                  | 919  | F6J97_07085 | cyanobacteria | Leptolyngbya sp. SIO4C1 | hypothetical protein F6J97_07085 [Leptolyngbya sp. SIO4C1].     | -   |
| NEP23856.1 | CASPASe+nSTAND1+TM+BetaPropeller*→?→  <-?<-?<-SIG+TM+TM+TM+TM+TM+TM+TM+TM                                  | CASPASe+nSTAND1+TM+BetaPropeller | 1358 | F6K49_18200 | cyanobacteria | Moorea sp. SIO3I6       | CHAT domain-containing protein [Moorea sp. SIO3I6].             | -   |
| NEQ36510.1 | GUN4→ CASPASe+EAD10→?→ EAD10+nSTAND1+TM+BetaPropeller*→                                                    | EAD10+nSTAND1+TM+BetaPropeller   | 1351 | F6K40_09560 | cyanobacteria | Okeania sp. SIO3I5      | WD40 repeat domain-containing protein [Okeania sp. SIO3I5].     | -   |
| NEQ36637.1 | RRM→  <-?  ?→ Trypsin+nSTAND1+BetaPropeller*→                                                              | Trypsin+nSTAND1+BetaPropeller    | 1463 | F6K40_10255 | cyanobacteria | Okeania sp. SIO3I5      | trypsin-like serine protease [Okeania sp. SIO3I5].              | -   |
| NEQ38190.1 | <-SIG+TPR  ?→ Trypsin+nSTAND1+TM+TPR+TPR+TPR*→                                                             | Trypsin+nSTAND1+TM+TPR+TPR+TPR   | 1116 | F6K40_18755 | cyanobacteria | Okeania sp. SIO3I5      | tetratricopeptide repeat protein, partial [Okeania sp. SIO3I5]. | -   |
| NEQ49185.1 | <-NUDIX<-?  ?→?→  <-ParA-Soj-PloopNTPase  TIR+nSTAND1*→                                                    | TIR+nSTAND1                      | 848  | F6K11_03505 | cyanobacteria | Leptolyngbya sp. SIO3F4 | TIR domain-containing protein [Leptolyngbya sp. SIO3F4].        | -   |
| NEQ50781.1 | <-Pentapeptide  TIR+nSTAND1*→ TIR+TM+BetaPropeller→                                                        | TIR+nSTAND1                      | 927  | F6K11_11700 | cyanobacteria | Leptolyngbya sp. SIO3F4 | TIR domain-containing protein [Leptolyngbya sp. SIO3F4].        | -   |
| NEQ65990.1 | CASPASe+nSTAND1+TM+BetaPropeller*→ PSE→?→  <-?<-TM                                                         | CASPASe+nSTAND1+TM+BetaPropeller | 1386 | F6K21_10900 | cyanobacteria | Symploca sp. SIO2D2     | hypothetical protein F6K21_10900 [Symploca sp. SIO2D2].         | -   |
| NEQ66888.1 | <-SIG+Pentapeptide<-Trypco1  CASPASe+nSTAND1+TM+BetaPropeller*→ BetaPropeller→                             | CASPASe+nSTAND1+TM+BetaPropeller | 1422 | F6K21_15565 | cyanobacteria | Symploca sp. SIO2D2     | peptidase C14, partial [Symploca sp. SIO2D2].                   | -   |
| NEQ68332.1 | nSTAND1+TM+BetaPropeller*→                                                                                 | nSTAND1+TM+BetaPropeller         | 1227 | F6K21_23100 | cyanobacteria | Symploca sp. SIO2D2     | hypothetical protein F6K21_23100 [Symploca sp. SIO2D2].         | -   |
| NER26420.1 | <-ABhydrolase<-Trypco1  CASPASe+nSTAND1+GUN4*→  <-?  ?→ ParA-Soj-PloopNTPase→                              | CASPASe+nSTAND1+GUN4             | 980  | F6J89_02035 | cyanobacteria | Symploca sp. SIO1C4     | hypothetical protein F6J89_02035 [Symploca sp. SIO1C4].         | -   |
| NER33117.1 | CASPASe+nSTAND1+BetaPropeller*→                                                                            | CASPASe+nSTAND1+BetaPropeller    | 1563 | F6J93_03400 | cyanobacteria | Oscillatoria sp. SIO1A7 | hypothetical protein F6J93_03400 [Oscillatoria sp. SIO1A7].     | -   |
| NER37564.1 | EAD8+Trypsin→  <-?  HTH+nSTAND1+TM+BetaPropeller*→                                                         | HTH+nSTAND1+TM+BetaPropeller     | 1342 | F6J93_26975 | cyanobacteria | Oscillatoria sp. SIO1A7 | hypothetical protein F6J93_26975 [Oscillatoria sp. SIO1A7].     | -   |
| NER38168.1 | <-TM<-?  CASPASe+nSTAND1+BetaPropeller*→  <-Uma2<-?<-?<-?<-SIG+TM+TM  ?→ Uma2→                             | CASPASe+nSTAND1+BetaPropeller    | 1954 | F6J93_30125 | cyanobacteria | Oscillatoria sp. SIO1A7 | hypothetical protein F6J93_30125 [Oscillatoria sp. SIO1A7].     | -   |
| NER71216.1 | <-ABhydrolase<-?<-?  ?→  <-Trypco1  CASPASe+nSTAND1*→                                                      | CASPASe+nSTAND1                  | 926  | F6J95_03475 | cyanobacteria | Leptolyngbya sp. SIO1E4 | peptidase C14 [Leptolyngbya sp. SIO1E4].                        | -   |
| NER94406.1 | <-EAD4+APATPase+BetaPropeller  ?→?→  <-?<-?<-Trypco1  PASE+nSTAND1+TM+Pentapeptide*→                       | PASE+nSTAND1+TM+Pentapeptide     | 1064 | F6J86_11280 | cyanobacteria | Symploca sp. SIO1B1     | hypothetical protein F6J86_11280 [Symploca sp. SIO1B1].         | -   |
| NES05250.1 | CASPASe+EAD10→?→ EAD10+nSTAND1+TM+BetaPropeller*→                                                          | EAD10+nSTAND1+TM+BetaPropeller   | 1461 | F6K22_21960 | cyanobacteria | Okeania sp. SIO2F4      | hypothetical protein F6K22_21960 [Okeania sp. SIO2F4].          | -   |

| acc        | operon                                                                             | architecture                              | len  | gen.name    | taxend              | species                            | define                                                                          | gca |
|------------|------------------------------------------------------------------------------------|-------------------------------------------|------|-------------|---------------------|------------------------------------|---------------------------------------------------------------------------------|-----|
| NES64500.1 | Cluster59_2clades→ GUN4→ nSTAND1*→                                                 | nSTAND1                                   | 623  | F6K24_04135 | cyanobacteria       | Okeania sp. SIO2D1                 | S-layer homology domain-containing protein [Okeania sp. SIO2D1].                | -   |
| NES65413.1 | nSTAND1+TM+BetaPropeller*→                                                         | nSTAND1+TM+BetaPropeller                  | 1165 | F6K24_09195 | cyanobacteria       | Okeania sp. SIO2D1                 | WD40 repeat domain-containing protein, partial [Okeania sp. SIO2D1].            | -   |
| NES97446.1 | nSTAND1+BetaPropeller*→                                                            | nSTAND1+BetaPropeller                     | 1191 | F6K32_19940 | cyanobacteria       | Desertifilum sp. SIO1I2            | WD40 repeat domain-containing protein, partial [Desertifilum sp. SIO1I2].       | -   |
| NET34881.1 | CASPASE+nSTAND1+TM*→                                                               | CASPASE+nSTAND1+TM                        | 975  | F6K19_23135 | cyanobacteria       | Cyanothece sp. SIO1E1              | hypothetical protein F6K19_23135 [Cyanothece sp. SIO1E1].                       | -   |
| NET36631.1 | <-MNS<-?  ?→  <-?  CASPASE+nSTAND1*→                                               | CASPASE+nSTAND1                           | 704  | F6K19_32150 | cyanobacteria       | Cyanothece sp. SIO1E1              | hypothetical protein F6K19_32150 [Cyanothece sp. SIO1E1].                       | -   |
| NET37730.1 | CASPASE+nSTAND1*→                                                                  | CASPASE+nSTAND1                           | 567  | F6K19_37925 | cyanobacteria       | Cyanothece sp. SIO1E1              | hypothetical protein F6K19_37925, partial [Cyanothece sp. SIO1E1].              | -   |
| NET40110.1 | nSTAND1*→                                                                          | nSTAND1                                   | 497  | F6K19_50595 | cyanobacteria       | Cyanothece sp. SIO1E1              | ATP-binding protein, partial [Cyanothece sp. SIO1E1].                           | -   |
| NET86531.1 | <-FAD-NAD-dep-oxidoreductase<-?<-TM<-?  ?→?→ EACC2+CASPASE+nSTAND1+BetaPropeller*→ | EACC2+CASPASE+nSTAND1+BetaPropeller       | 1577 | F6K45_00165 | cyanobacteria       | Kamptonema sp. SIO1D9              | CHAT domain-containing protein [Kamptonema sp. SIO1D9].                         | -   |
| NET91215.1 | CASPASE+nSTAND1+TM+BetaPropeller*→                                                 | CASPASE+nSTAND1+TM+BetaPropeller          | 1474 | F6K45_24510 | cyanobacteria       | Kamptonema sp. SIO1D9              | hypothetical protein F6K45_24510 [Kamptonema sp. SIO1D9].                       | -   |
| NIM11146.1 | TIR+DrHyd→ nSTAND1+BetaPropeller*→?→?→?→ TIR→                                      | nSTAND1+BetaPropeller                     | 1081 | GTO81_04125 | bacteria            | Candidatus Aminicenantes bacterium | AAA family ATPase [Candidatus Aminicenantes bacterium].                         | -   |
| NIM60309.1 | TIR+DrHyd→ nSTAND1+BetaPropeller*→ BetaPropeller→                                  | nSTAND1+BetaPropeller                     | 1137 | GTO30_01255 | acidobacteria       | Acidobacteria bacterium            | hypothetical protein GTO30_01255 [Acidobacteria bacterium].                     | -   |
| NIN64528.1 | wHTH-4stranded+TPRs+nSTAND1+BetaPropeller*→ PSE→?→?→ ICLR-HTH→                     | wHTH-4stranded+TPRs+nSTAND1+BetaPropeller | 1481 | GTO63_07465 | chloroflexi         | Anaerolineae bacterium             | hypothetical protein GTO63_07465 [Anaerolineae bacterium].                      | -   |
| NIO87402.1 | nSTAND1*→                                                                          | nSTAND1                                   | 271  | GTN68_43335 | bacteria            | Candidatus Aminicenantes bacterium | hypothetical protein GTN68_43335, partial [Candidatus Aminicenantes bacterium]. | -   |
| NIP95306.1 | TIR+DrHyd→ nSTAND1*→ nSTAND1→                                                      | nSTAND1                                   | 157  | GWO24_18410 | verrucomicrobia     | Akkermansia bacterium              | ATP-binding protein, partial [Akkermansia bacterium].                           | -   |
| NIQ11829.1 | Pkinase+LuxR-HTH+nSTAND1*→ nSTAND1→                                                | Pkinase+LuxR-HTH+nSTAND1                  | 550  | GWO23_20275 | gammaproteobacteria | Gammaproteobacteria bacterium      | protein kinase [Gammaproteobacteria bacterium].                                 | -   |
| NIR47522.1 | nSTAND1*→                                                                          | nSTAND1                                   | 215  | GWO09_03595 | bacteria            | candidate division KSB1 bacterium  | hypothetical protein GWO09_03595, partial [candidate division KSB1 bacterium].  | -   |

| acc        | operon                                                                               | architecture                          | len  | gen.name    | taxend              | species                                 | define                                                                      | gca |
|------------|--------------------------------------------------------------------------------------|---------------------------------------|------|-------------|---------------------|-----------------------------------------|-----------------------------------------------------------------------------|-----|
| NJD08806.1 | TIR→ nSTAND1+TM+TM+TM+TM*→                                                           | nSTAND1+TM+TM+TM+TM                   | 793  | FIA97_20290 | gammaproteobacteria | Methylococcaceae bacterium              | hypothetical protein FIA97_20290 [Methylococcaceae bacterium].              | -   |
| NJK52968.1 | SIG+nSTAND1*→                                                                        | SIG+nSTAND1                           | 216  | HC936_09320 | cyanobacteria       | Leptolyngbyaceae cyanobacterium SU_3_3  | ATP-binding protein, partial [Leptolyngbyaceae cyanobacterium SU_3_3].      | -   |
| NJK55885.1 | CASPASE+CASPASE+nSTAND1+BetaPropeller*→  <-?  ?→?→ ABhydrolase→ HOP2→                | CASPASE+CASPASE+nSTAND1+BetaPropeller | 1614 | HC939_07740 | cyanobacteria       | Pleurocapsa sp. SU_5_0                  | NACHT domain-containing protein [Pleurocapsa sp. SU_5_0].                   | -   |
| NJL22036.1 | <-SIG+TPR  CASPASE+nSTAND1*→ nSTAND1→                                                | CASPASE+nSTAND1                       | 461  | HC895_16420 | cyanobacteria       | Leptolyngbyaceae cyanobacterium SM1_3_5 | hypothetical protein HC895_16420 [Leptolyngbyaceae cyanobacterium SM1_3_5]. | -   |
| NJL38884.1 | nSTAND1+BetaPropeller*→ SIG+TPR→                                                     | nSTAND1+BetaPropeller                 | 1232 | HC899_20695 | cyanobacteria       | Leptolyngbyaceae cyanobacterium SM1_4_3 | hypothetical protein HC899_20695 [Leptolyngbyaceae cyanobacterium SM1_4_3]. | -   |
| NJL61102.1 | <-ENOYCOADEHYD<-ENOYCOADEHYD  VWA+FHA→?→  <-Trypco1  CASPASE+nSTAND1*→ Pentapeptide→ | CASPASE+nSTAND1                       | 666  | HC903_03770 | verrucomicrobia     | Methylacidiphilales bacterium           | hypothetical protein HC903_03770 [Methylacidiphilales bacterium].           | -   |
| NJL84534.1 | <-Trypco1  CASPASE+nSTAND1+TM*→                                                      | CASPASE+nSTAND1+TM                    | 783  | HC890_19295 | chloroflexi         | Chloroflexaceae bacterium               | AAA family ATPase [Chloroflexaceae bacterium].                              | -   |
| NJM08748.1 | HTH+CR-Kinase+nSTAND1*→ nSTAND1→                                                     | HTH+CR-Kinase+nSTAND1                 | 746  | HC891_25000 | bacteria            | Candidatus Gracilibacteria bacterium    | protein kinase [Candidatus Gracilibacteria bacterium].                      | -   |
| NJM70522.1 | <-Trypco1  CASPASE+nSTAND1*→                                                         | CASPASE+nSTAND1                       | 957  | HC862_09975 | cyanobacteria       | Scytonema sp. RU_4_4                    | hypothetical protein HC862_09975 [Scytonema sp. RU_4_4].                    | -   |
| NJM71751.1 | nSTAND1*→ nSTAND1→                                                                   | nSTAND1                               | 293  | HC862_16985 | cyanobacteria       | Scytonema sp. RU_4_4                    | hypothetical protein HC862_16985 [Scytonema sp. RU_4_4].                    | -   |
| NJM72049.1 | TIR+DrHyd→ nSTAND1+TM+BetaPropeller*→?→?→  <-?<-AAA                                  | nSTAND1+TM+BetaPropeller              | 1212 | HC862_18715 | cyanobacteria       | Scytonema sp. RU_4_4                    | hypothetical protein HC862_18715 [Scytonema sp. RU_4_4].                    | -   |
| NJM73217.1 | Pkinase→?→  <-?  ?→ EACC2+CASPASE+nSTAND1+BetaPropeller*→                            | EACC2+CASPASE+nSTAND1+BetaPropeller   | 1020 | HC862_25525 | cyanobacteria       | Scytonema sp. RU_4_4                    | CHAT domain-containing protein, partial [Scytonema sp. RU_4_4].             | -   |
| NJM73324.1 | nSTAND1+BetaPropeller*→  <-PSE<-?<-TPR                                               | nSTAND1+BetaPropeller                 | 1058 | HC862_26150 | cyanobacteria       | Scytonema sp. RU_4_4                    | hypothetical protein HC862_26150 [Scytonema sp. RU_4_4].                    | -   |
| NJM74119.1 | EACC2+CASPASE+nSTAND1*→ nSTAND1→                                                     | EACC2+CASPASE+nSTAND1                 | 595  | HC862_30810 | cyanobacteria       | Scytonema sp. RU_4_4                    | CHAT domain-containing protein [Scytonema sp. RU_4_4].                      | -   |
| NJN08585.1 | Pentapeptide→ CASPASE+nSTAND1+TM*→                                                   | CASPASE+nSTAND1+TM                    | 758  | HC815_11555 | cyanobacteria       | Richelia sp. RM1_1_1                    | hypothetical protein HC815_11555 [Richelia sp. RM1_1_1].                    | -   |

| acc        | operon                                                                                                                                              | architecture                                 | len  | gen.name    | taxend              | species                                 | define                                                                               | gca |
|------------|-----------------------------------------------------------------------------------------------------------------------------------------------------|----------------------------------------------|------|-------------|---------------------|-----------------------------------------|--------------------------------------------------------------------------------------|-----|
| NJN41702.1 | TM+TM+TM+TM+TM+TM+TM+TM+TM+TM+TM+cNMP→?→ nSTAND1+BetaPropeller*→ BetaPropeller→                                                                     | nSTAND1+BetaPropeller                        | 821  | HC811_05160 | bacteroidetes       | Flammeovirgaceae bacterium              | High-affinity carbon uptake protein Hat/HatR [Flammeovirgaceae bacterium].           | -   |
| NJN44056.1 | Pkinase→?→ nSTAND1+TM+BetaPropeller*→                                                                                                               | nSTAND1+TM+BetaPropeller                     | 724  | HC806_04550 | chloroflexi         | Anaerolineae bacterium                  | hypothetical protein HC806_04550 [Anaerolineae bacterium].                           | -   |
| NJN57460.1 | nSTAND1+BetaPropeller*→?→  <-?<-?  ?→ REC→?→ TM+HAMP+GAF+GAF+GAF+GAF+MCPsignal→                                                                     | nSTAND1+BetaPropeller                        | 1198 | HC879_08140 | cyanobacteria       | Leptolyngbyaceae cyanobacterium SL_5_9  | hypothetical protein HC879_08140, partial [Leptolyngbyaceae cyanobacterium SL_5_9].  | -   |
| NJN73136.1 | Uma2→ PSE→  <-?<-PSE  ?→  <-Trypco1  CASPACE+nSTAND1*→?→?→  <-?<-PSE<-?  SIG+TM+TM+TM+TM+TM→                                                        | CASPACE+nSTAND1                              | 902  | HC799_10205 | cyanobacteria       | Limnothrix sp. RL_2_0                   | peptidase C14 [Limnothrix sp. RL_2_0].                                               | -   |
| NJN87470.1 | SIG+nSTAND1*→ nSTAND1+BetaPropeller→  <-GGDEF+EAL                                                                                                   | SIG+nSTAND1                                  | 393  | HC881_15635 | cyanobacteria       | Leptolyngbyaceae cyanobacterium SL_7_1  | hypothetical protein HC881_15635 [Leptolyngbyaceae cyanobacterium SL_7_1].           | -   |
| NJO16618.1 | REC→ GGDEF+EAL→?→?→?→ TIR+DrHyd+TIR→ nSTAND1+BetaPropeller*→                                                                                        | nSTAND1+BetaPropeller                        | 1205 | HC877_13005 | gammaproteobacteria | Thioploca sp.                           | hypothetical protein HC877_13005 [Thioploca sp.].                                    | -   |
| NJP11832.1 | <-Trypco1  CASPACE+nSTAND1*→                                                                                                                        | CASPACE+nSTAND1                              | 1033 | HC866_22115 | cyanobacteria       | Leptolyngbyaceae cyanobacterium RU_5_1  | AAA family ATPase [Leptolyngbyaceae cyanobacterium RU_5_1].                          | -   |
| NJR38187.1 | SIG+TPR→?→?→ nSTAND1*→ nSTAND1→ BetaPropeller→                                                                                                      | nSTAND1                                      | 274  | HC781_04220 | cyanobacteria       | Leptolyngbyaceae cyanobacterium CSU_1_4 | ATP-binding protein [Leptolyngbyaceae cyanobacterium CSU_1_4].                       | -   |
| NJR62416.1 | HTH+APATPase+BetaPropeller→  <-?  ?→  <-TPR  CASPACE+nSTAND1+BetaPropeller*→                                                                        | CASPACE+nSTAND1+BetaPropeller                | 1723 | HC769_28590 | cyanobacteria       | Cyanobacteria bacterium CRU_2_1         | hypothetical protein HC769_28590 [Cyanobacteria bacterium CRU_2_1].                  | -   |
| NJR67118.1 | CASPACE+nSTAND1+BetaPropeller*→                                                                                                                     | CASPACE+nSTAND1+BetaPropeller                | 1120 | HC772_20280 | cyanobacteria       | Leptolyngbyaceae cyanobacterium CRU_2_3 | hypothetical protein HC772_20280, partial [Leptolyngbyaceae cyanobacterium CRU_2_3]. | -   |
| NJR75219.1 | TIR+DrHyd→ nSTAND1→ nSTAND1+TM+BetaPropeller*→ BetaPropeller→                                                                                       | nSTAND1+TM+BetaPropeller                     | 760  | HC773_19440 | cyanobacteria       | Scytonema sp. CRU_2_7                   | WD40 repeat domain-containing protein [Scytonema sp. CRU_2_7].                       | -   |
| NKQ34063.1 | Pkinase+nSTAND1+BetaPropeller*→                                                                                                                     | Pkinase+nSTAND1+BetaPropeller                | 1595 | HF973_00435 | chloroflexi         | Chloroflexi bacterium                   | protein kinase [Chloroflexi bacterium].                                              | -   |
| NLF66968.1 | <-REC<-?<-?<-HTH+MED15  ?→?→ bDLD1+nSTAND1*→                                                                                                        | bDLD1+nSTAND1                                | 1094 | GX579_20460 | chloroflexi         | Chloroflexi bacterium                   | ATP-binding protein [Chloroflexi bacterium].                                         | -   |
| NLF75477.1 | TIR+TM+NACHT+TM+TM+TM+TM+TM+TM+TM+FGS→?→  <-SIG+ABhydrolase<-SIG+ABhydrolase<-?<-SIG+ABhydrolase<-?  wHTH-4stranded+TPRs+nSTAND1+TM+BetaPropeller*→ | wHTH-4stranded+TPRs+nSTAND1+TM+BetaPropeller | 1465 | GX573_07245 | chloroflexi         | Chloroflexi bacterium                   | hypothetical protein GX573_07245 [Chloroflexi bacterium].                            | -   |
| NLF76559.1 | Pkinase+nSTAND1+TM+BetaPropeller*→                                                                                                                  | Pkinase+nSTAND1+TM+BetaPropeller             | 1037 | GX573_12755 | chloroflexi         | Chloroflexi bacterium                   | protein kinase, partial [Chloroflexi bacterium].                                     | -   |

| acc        | operon                                                                                                          | architecture                                 | len  | gen.name    | taxend              | species                                            | define                                                                                       | gca             |
|------------|-----------------------------------------------------------------------------------------------------------------|----------------------------------------------|------|-------------|---------------------|----------------------------------------------------|----------------------------------------------------------------------------------------------|-----------------|
| NLF76682.1 | wHTH-4stranded+TPRs+nSTAND1+TM+BetaPropeller*→                                                                  | wHTH-4stranded+TPRs+nSTAND1+TM+BetaPropeller | 1439 | GX573_13375 | chloroflexi         | Chloroflexi bacterium                              | PQQ-binding-like beta-propeller repeat protein, partial [Chloroflexi bacterium].             | -               |
| NNE66468.1 | <-Pkinase+TPR  ?→ TIR+TIR→ nSTAND1*→                                                                            | nSTAND1                                      | 181  | HKN33_07865 | acidobacteria       | Pyrinomonadaceae bacterium                         | hypothetical protein HKN33_07865, partial [Pyrinomonadaceae bacterium].                      | -               |
| NNF77676.1 | nSTAND1+TM+BetaPropeller*→                                                                                      | nSTAND1+TM+BetaPropeller                     | 821  | HKN05_06570 | alphaproteobacteria | Rhizobiales bacterium                              | WD40 repeat domain-containing protein, partial [Rhizobiales bacterium].                      | -               |
| NNL69935.1 | TPRs+nSTAND1+PBPB*→                                                                                             | TPRs+nSTAND1+PBPB                            | 1201 | HKO70_08255 | actinobacteria      | Acidimicrobiia bacterium                           | transporter substrate-binding domain-containing protein, partial [Acidimicrobiia bacterium]. | -               |
| NNM23296.1 | <-Patatin  TIR→ nSTAND1+BetaPropeller*→  <-?<-?<-?  ?→?→  <-TPR                                                 | nSTAND1+BetaPropeller                        | 1191 | HKO54_07065 | bacteroidetes       | Flavobacteriaceae bacterium                        | hypothetical protein HKO54_07065 [Flavobacteriaceae bacterium].                              | -               |
| NOG19904.1 | <-SUA<-?<-?<-?  ?→ CASPASE+nSTAND1+BetaPropeller*→  <-?  ?→?→ HOP2→                                             | CASPASE+nSTAND1+BetaPropeller                | 1739 | HAV12_42195 | bacteroidetes       | Flavobacterium sp. CLA17                           | AAA family ATPase [Flavobacterium sp. CLA17].                                                | -               |
| OFV91558.1 | TIR+DrHyd→ nSTAND1+TPR*→?→  <-?<-?  ?→?→  <-S1COLD                                                              | nSTAND1+TPR                                  | 928  | A3H95_01005 | acidobacteria       | Acidobacteria bacterium RIFC-SPLOWO2_02_FULL_64_15 | hypothetical protein A3H95_01005 [Acidobacteria bacterium RIFC-SPLOWO2_02_FULL_64_15].       | GCA_001767165.1 |
| OFW18721.1 | AbiEii→ TIR+DrHyd→ nSTAND1+TM+TPR*→?→ tRNA→  <-?<-?<-ACET                                                       | nSTAND1+TM+TPR                               | 935  | A3H97_17825 | acidobacteria       | Acidobacteria bacterium RIFC-SPLOWO2_02_FULL_65_29 | hypothetical protein A3H97_17825 [Acidobacteria bacterium RIFC-SPLOWO2_02_FULL_65_29].       | GCA_001767435.1 |
| OFX23090.1 | <-ABhydrolase  ?→ TM+TM+TM+TM+TM+TM+TM+TM+TM+TM+TM+TM+cNMP→?→ TIR+DrHyd→ nSTAND1+BetaPropeller*→                | nSTAND1+BetaPropeller                        | 1019 | A2041_06150 | bacteroidetes       | Bacteroidetes bacterium GWA2_31_9b                 | hypothetical protein A2041_06150 [Bacteroidetes bacterium GWA2_31_9b].                       | GCA_001769005.1 |
| OFX91075.1 | SIG+TM→?→ MORC→?→ AAA→ TM+TM+TM+TM+TM+TM+TM+TM+TM+TM+TM+TM+cNMP→?→ nSTAND1+TM+BetaPropeller*→                   | nSTAND1+TM+BetaPropeller                     | 1030 | A2X06_13615 | bacteroidetes       | Bacteroidetes bacterium GWC2_40_22                 | hypothetical protein A2X06_13615 [Bacteroidetes bacterium GWC2_40_22].                       | GCA_001768305.1 |
| OFX95806.1 | SIG+TM→?→ MORC→?→ AAA→ TM+TM+TM+TM+TM+TM+TM+TM+TM+TM+TM+TM+cNMP→?→ nSTAND1+TM+BetaPropeller*→                   | nSTAND1+TM+BetaPropeller                     | 1030 | A2X05_06820 | bacteroidetes       | Bacteroidetes bacterium GWE2_41_25                 | hypothetical protein A2X05_06820 [Bacteroidetes bacterium GWE2_41_25].                       | GCA_001768485.1 |
| OFY35811.1 | TM+TM+TM+TM+TM+TM+TM+TM+TM+TM+TM+TM+cNMP→?→ TIR+DrHyd→ SIG+nSTAND1+TM+BetaPropeller*→?→?→?→?→  <-?<-?  SIG+TPR→ | SIG+nSTAND1+TM+BetaPropeller                 | 1024 | A2W91_17400 | bacteroidetes       | Bacteroidetes bacterium GWF2_38_335                | hypothetical protein A2W91_17400 [Bacteroidetes bacterium GWF2_38_335].                      | GCA_001769535.1 |



| acc        | operon                                                                                                                            | architecture                            | len  | gen.name     | taxend             | species                                           | define                                                                                 | gca             |
|------------|-----------------------------------------------------------------------------------------------------------------------------------|-----------------------------------------|------|--------------|--------------------|---------------------------------------------------|----------------------------------------------------------------------------------------|-----------------|
| OYD95156.1 | Pentapeptide→ Pentapeptide→ NACHT+TM+TM+TM→?→?→ PSE→ PSE→ Pentapeptide→ NACHT+TM+TM+TM→ nSTAND1+*→?→ TIR→?→?→ MoxR→ VWA+FGS→ FGS→ | nSTAND1+                                | 814  | CDG77_10550  | cyanobacteria      | Nostoc sp. 'Peltigera membranacea cyanobiont' 213 | hypothetical protein CDG77_10550 [Nostoc sp. 'Peltigera membranacea cyanobiont' 213].  | GCA_002245975.1 |
| PCH95772.1 | TM+TM+TM+TM+TM+TM+TM+TM+TM+TM+TM+TM+cNMP→?→ TIR+DrHyd→ nSTAND1+BetaPropeller*→                                                    | nSTAND1+BetaPropeller                   | 1001 | COB85_04230  | bacteroidetes      | Bacteroidetes bacterium                           | hypothetical protein COB85_04230, partial [Bacteroidetes bacterium].                   | GCA_002401055.1 |
| PJF20968.1 | Pkinase+nSTAND1*→                                                                                                                 | Pkinase+nSTAND1                         | 712  | CUN56_13480  | chloroflexi        | Candidatus Thermofonsia Clade 2 bacterium         | hypothetical protein CUN56_13480, partial [Candidatus Thermofonsia Clade 2 bacterium]. | GCA_002794505.1 |
| PJF22587.1 | TIR+nSTAND1+TM+BetaPropeller+SH3*→                                                                                                | TIR+nSTAND1+TM+BetaPropeller+SH3        | 1467 | CUN56_05240  | chloroflexi        | Candidatus Thermofonsia Clade 2 bacterium         | hypothetical protein CUN56_05240 [Candidatus Thermofonsia Clade 2 bacterium].          | GCA_002794505.1 |
| PJF29877.1 | TIR+nSTAND1+TM+BetaPropeller+SH3*→  <-?<-?<-REC<-REC                                                                              | TIR+nSTAND1+TM+BetaPropeller+SH3        | 1475 | CUN52_06100  | chloroflexi        | Candidatus Thermofonsia Clade 2 bacterium         | hypothetical protein CUN52_06100 [Candidatus Thermofonsia Clade 2 bacterium].          | GCA_002794515.1 |
| PJF40565.1 | <-ABC-ATPase  ?→ Pkinase+nSTAND1+fvmX2+BetaPropeller*→                                                                            | Pkinase+nSTAND1+fvmX2+BetaPropeller     | 1488 | CUN54_04825  | chloroflexi        | Candidatus Thermofonsia Clade 2 bacterium         | hypothetical protein CUN54_04825 [Candidatus Thermofonsia Clade 2 bacterium].          | GCA_002794595.1 |
| PJF43571.1 | <-FAD-NAD-dep-oxidoreductase<-?  ?→ Pkinase+nSTAND1+TM+BetaPropeller*→                                                            | Pkinase+nSTAND1+TM+BetaPropeller        | 1074 | CUN55_08445  | chloroflexi        | Candidatus Thermofonsia Clade 2 bacterium         | hypothetical protein CUN55_08445, partial [Candidatus Thermofonsia Clade 2 bacterium]. | GCA_002794585.1 |
| PKP08385.1 | TM+TM+TM+TM+TM+TM+TM+TM+TM+TM+TM+cNMP→?→ TIR+DrHyd→ nSTAND1+BetaPropeller*→                                                       | nSTAND1+BetaPropeller                   | 1044 | CVU09_16155  | bacteroidetes      | Bacteroidetes bacterium HGW-Bacteroidetes-4       | hypothetical protein CVU09_16155 [Bacteroidetes bacterium HGW-Bacteroidetes-4].        | GCA_002840905.1 |
| PLX14833.1 | TIR+DrHyd→ nSTAND1+BetaPropeller*→                                                                                                | nSTAND1+BetaPropeller                   | 1026 | C0597_09500  | bacteroidetes      | Marinilabiliales bacterium                        | hypothetical protein C0597_09500 [Marinilabiliales bacterium].                         | GCA_002869305.1 |
| PSO51577.1 | <-REC  ?→?→?→?→ CASPASE+CASPASE+nSTAND1+BetaPropeller*→  <-?<-?<-Cluster59_2clades                                                | CASPASE+CASPASE+nSTAND1+BetaPropeller   | 1683 | BRC33_00055  | cyanobacteria      | Cyanobacteria bacterium SW_9_44_58                | hypothetical protein BRC33_00055 [Cyanobacteria bacterium SW_9_44_58].                 | GCA_003021905.1 |
| PTQ78533.1 | <-SIG+Trypsin+PDZ  ?→?→  <-?<-?  tRNA→ TIR→ TIR+DrHyd→ nSTAND1+BetaPropeller*→?→  <-SLATT                                         | nSTAND1+BetaPropeller                   | 1071 | CSR26_102101 | betaproteobacteria | Nitrosomonas oligotropha                          | WD40 repeat protein [Nitrosomonas oligotropha].                                        | GCA_003050805.1 |
| PWH17201.1 | nSTAND1+TM+BetaPropeller+TM+TM+TM+TM+TM*→  <-?<-?  ?→  <-?<-?<-?<-FAD-NAD-dep-oxidoreductase                                      | nSTAND1+TM+BetaPropeller+TM+TM+TM+TM+TM | 1488 | DDG60_02865  | chloroflexi        | Anaerolineae bacterium                            | hypothetical protein DDG60_02865 [Anaerolineae bacterium].                             | GCA_003130845.1 |
| PWT98015.1 | <-REC<-?  TIR+DrHyd→ nSTAND1+TM+TM+TM*→                                                                                           | nSTAND1+TM+TM+TM                        | 748  | C5B51_30205  | acidobacteria      | Acidobacteriia bacterium                          | hypothetical protein C5B51_30205 [Acidobacteriia bacterium].                           | GCA_003175985.1 |
| PWU20186.1 | TPRs+ACYC+nSTAND1+BetaPropeller*→  <-?<-?<-?<-SWACOS+TPR+TPR                                                                      | TPRs+ACYC+nSTAND1+BetaPropeller         | 1499 | C5B48_12805  | bacteria           | Candidatus Rokubacteria bacterium                 | hypothetical protein C5B48_12805, partial [Candidatus Rokubacteria bacterium].         | GCA_003176155.1 |

| acc        | operon                                                          | architecture                                      | len  | gen.name    | taxend           | species                    | define                                                                | gca             |
|------------|-----------------------------------------------------------------|---------------------------------------------------|------|-------------|------------------|----------------------------|-----------------------------------------------------------------------|-----------------|
| PYP60217.1 | TIR→ SLATT→ TIR+TIR→ nSTAND1+BetaPropeller+BetaPropeller+TPRs*→ | nSTAND1+BetaPropeller+BetaPropeller+TPRs          | 2017 | DMD40_01135 | gemmatimonadetes | Gemmatimonadetes bacterium | hypothetical protein DMD40_01135 [Gemmatimonadetes bacterium].        | GCA_003223395.1 |
| PYQ05559.1 | SIGMA-HTH→ PSE→  <-PSE  ?→?→ TIR+DrHyd→ nSTAND1+TM*→            | nSTAND1+TM                                        | 791  | DMF82_08210 | acidobacteria    | Acidobacteria bacterium    | hypothetical protein DMF82_08210 [Acidobacteria bacterium].           | GCA_003223575.1 |
| PYS22176.1 | TIR+DrHyd→ nSTAND1+TM+TPR*→                                     | nSTAND1+TM+TPR                                    | 1292 | DMF72_14520 | acidobacteria    | Acidobacteria bacterium    | hypothetical protein DMF72_14520 [Acidobacteria bacterium].           | GCA_003222895.1 |
| PYS83976.1 | TIR+DrHyd+TIR→ nSTAND1+TPR+TPR*→                                | nSTAND1+TPR+TPR                                   | 1090 | DMF67_06825 | acidobacteria    | Acidobacteria bacterium    | hypothetical protein DMF67_06825 [Acidobacteria bacterium].           | GCA_003222975.1 |
| PYS96660.1 | nSTAND1+TM+TPR*→                                                | nSTAND1+TM+TPR                                    | 940  | DMF65_12750 | acidobacteria    | Acidobacteria bacterium    | hypothetical protein DMF65_12750, partial [Acidobacteria bacterium].  | GCA_003223015.1 |
| PYS98866.1 | TIR+TIR→ nSTAND1*→ nSTAND1+TIR→                                 | nSTAND1                                           | 360  | DMF65_09895 | acidobacteria    | Acidobacteria bacterium    | hypothetical protein DMF65_09895 [Acidobacteria bacterium].           | GCA_003223015.1 |
| PZN54462.1 | <-REC<-REC  ?→  <-?<-?<-?  Pkinase+nSTAND1+BetaPropeller*→      | Pkinase+nSTAND1+BetaPropeller                     | 962  | DIU68_10520 | chloroflexi      | Chloroflexi bacterium      | hypothetical protein DIU68_10520, partial [Chloroflexi bacterium].    | GCA_003242205.1 |
| PZO11654.1 | CASPASE+nSTAND1*→?→ GGDEF+EAL→                                  | CASPASE+nSTAND1                                   | 915  | DCF25_18990 | cyanobacteria    | Leptolyngbya foveolarum    | hypothetical protein DCF25_18990 [Leptolyngbya foveolarum].           | GCA_003242035.1 |
| PZV25433.1 | CASPASE+nSTAND1+TM*→                                            | CASPASE+nSTAND1+TM                                | 1002 | DCF12_14930 | cyanobacteria    | Snowella sp.               | hypothetical protein DCF12_14930 [Snowella sp.].                      | GCA_003249095.1 |
| QDL09256.1 | EACC2+CASPASE+nSTAND1+BetaPropeller*→                           | EACC2+CASPASE+nSTAND1+BetaPropeller               | 1599 | DP114_16315 | cyanobacteria    | Brasilonema sennae CENA114 | hypothetical protein DP114_16315 [Brasilonema sennae CENA114].        | GCA_006968745.1 |
| QDL10821.1 | EACC2+CASPASE+nSTAND1*→                                         | EACC2+CASPASE+nSTAND1                             | 600  | DP114_25545 | cyanobacteria    | Brasilonema sennae CENA114 | hypothetical protein DP114_25545 [Brasilonema sennae CENA114].        | GCA_006968745.1 |
| RCJ19564.1 | TPR+CASPASE→?→?→ nSTAND1+BetaPropeller*→?→?→?→  <-REC<-REC      | nSTAND1+BetaPropeller                             | 1246 | A6770_05315 | cyanobacteria    | Nostoc minutum NIES-26     | hypothetical protein A6770_05315 [Nostoc minutum NIES-26].            | GCA_003326215.1 |
| RCJ22548.1 | REC→ Pentapeptide→ nSTAND1+TM*→                                 | nSTAND1+TM                                        | 901  | A6770_29780 | cyanobacteria    | Nostoc minutum NIES-26     | hypothetical protein A6770_29780 [Nostoc minutum NIES-26].            | GCA_003326215.1 |
| REK19006.1 | wHTH-4stranded+TPRs+Pkinase+nSTAND1+BetaPropeller*→             | wHTH-4stranded+TPRs+Pkinase+nSTAND1+BetaPropeller | 1641 | DWQ40_07995 | actinobacteria   | Actinobacteria bacterium   | hypothetical protein DWQ40_07995, partial [Actinobacteria bacterium]. | GCA_003388545.1 |
| RIK38666.1 | TIR+nSTAND1+BetaPropeller*→ TIR+nSTAND1→                        | TIR+nSTAND1+BetaPropeller                         | 1082 | DCC58_16370 | chloroflexi      | Chloroflexi bacterium      | hypothetical protein DCC58_16370 [Chloroflexi bacterium].             | GCA_003577355.1 |
| RIK57209.1 | TIR+nSTAND1+BetaPropeller*→ TIR+CASPASE→                        | TIR+nSTAND1+BetaPropeller                         | 1528 | DCC57_02180 | chloroflexi      | Chloroflexi bacterium      | hypothetical protein DCC57_02180 [Chloroflexi bacterium].             | GCA_003577365.1 |

| acc        | operon                                                                                             | architecture                                  | len  | gen.name    | taxend              | species                       | define                                                                     | gca             |
|------------|----------------------------------------------------------------------------------------------------|-----------------------------------------------|------|-------------|---------------------|-------------------------------|----------------------------------------------------------------------------|-----------------|
| RIL11133.1 | SIG+ACYC+nSTAND1+BetaPropeller*→                                                                   | SIG+ACYC+nSTAND1+BetaPropeller                | 1397 | DCC79_05805 | bacteria            | bacterium                     | hypothetical protein DCC79_05805 [bacterium].                              | GCA_003576755.1 |
| RKZ38698.1 | TIR+TIR→ nSTAND1+BetaPropeller*→  <-?<-?  ?→ ICP8OBfold→                                           | nSTAND1+BetaPropeller                         | 1240 | DRQ49_13590 | gammaproteobacteria | Gammaproteobacteria bacterium | hypothetical protein DRQ49_13590 [Gammaproteobacteria bacterium].          | GCA_003646115.1 |
| RKZ43202.1 | nSTAND1+TM+BetaPropeller*→                                                                         | nSTAND1+TM+BetaPropeller                      | 1128 | DRQ41_05855 | gammaproteobacteria | Gammaproteobacteria bacterium | hypothetical protein DRQ41_05855, partial [Gammaproteobacteria bacterium]. | GCA_003645175.1 |
| RKZ45073.1 | nSTAND1+TM+BetaPropeller*→  <-?<-ABC-ATPase                                                        | nSTAND1+TM+BetaPropeller                      | 1431 | DRQ41_01220 | gammaproteobacteria | Gammaproteobacteria bacterium | hypothetical protein DRQ41_01220, partial [Gammaproteobacteria bacterium]. | GCA_003645175.1 |
| RKZ52679.1 | <-TM<-?  ?→?→ CASPASE+nSTAND1+TPR*→?→?→ XisI→                                                      | CASPASE+nSTAND1+TPR                           | 990  | DRR00_07525 | gammaproteobacteria | Gammaproteobacteria bacterium | hypothetical protein DRR00_07525 [Gammaproteobacteria bacterium].          | GCA_003645185.1 |
| RKZ62359.1 | TIR+DrHyd+TIR→?→?→ nSTAND1+BetaPropeller*→                                                         | nSTAND1+BetaPropeller                         | 935  | DRR08_06350 | gammaproteobacteria | Gammaproteobacteria bacterium | hypothetical protein DRR08_06350, partial [Gammaproteobacteria bacterium]. | GCA_003646135.1 |
| RKZ80031.1 | PKinase+SWACOS+GAF+SHELIX+HISKIN+REC→ nSTAND1*→                                                    | nSTAND1                                       | 253  | DRR19_24185 | gammaproteobacteria | Gammaproteobacteria bacterium | hypothetical protein DRR19_24185, partial [Gammaproteobacteria bacterium]. | GCA_003646175.1 |
| RLD63389.1 | <-SIG+TPR  ?→  <-?  TM+TM+TM+TM+TM+TM+TM+TM+TM+TM+TM+cNMP→?→ TIR+DrHyd→ nSTAND1+TM+BetaPropeller*→ | nSTAND1+TM+BetaPropeller                      | 1040 | DRJ01_03910 | bacteroidetes       | Bacteroidetes bacterium       | hypothetical protein DRJ01_03910 [Bacteroidetes bacterium].                | GCA_003648455.1 |
| RLE12060.1 | wHTH-4stranded+TPRs+ACYC+CR-Kinase+nSTAND1+TM*→                                                    | wHTH-4stranded+TPRs+ACYC+CR-Kinase+nSTAND1+TM | 1147 | DRJ28_09685 | actinobacteria      | Actinobacteria bacterium      | hypothetical protein DRJ28_09685, partial [Actinobacteria bacterium].      | GCA_003648875.1 |
| RLU96809.1 | HTH+nSTAND1+TM+BetaPropeller*→ SIG+TM+TM+TM+TM+TM→?→ ABC-ATPase→                                   | HTH+nSTAND1+TM+BetaPropeller                  | 1311 | CTZ27_17585 | actinobacteria      | Streptomyces griseocarneus    | DNA-binding protein [Streptomyces griseocarneus].                          | GCA_003674045.1 |
| RMD57402.1 | nSTAND1+TM+BetaPropeller*→                                                                         | nSTAND1+TM+BetaPropeller                      | 733  | D6828_03745 | nitrospirae         | Nitrospirae bacterium         | hypothetical protein D6828_03745, partial [Nitrospirae bacterium].         | GCA_003693935.1 |
| RMF02938.1 | nSTAND1+TM+FGS*→                                                                                   | nSTAND1+TM+FGS                                | 996  | D6768_07070 | chloroflexi         | Chloroflexi bacterium         | hypothetical protein D6768_07070, partial [Chloroflexi bacterium].         | GCA_003695455.1 |
| RMF02990.1 | nSTAND1+BetaPropeller*→                                                                            | nSTAND1+BetaPropeller                         | 1236 | D6768_06945 | chloroflexi         | Chloroflexi bacterium         | hypothetical protein D6768_06945, partial [Chloroflexi bacterium].         | GCA_003695455.1 |
| RMF76640.1 | Pkinase+nSTAND1+TM+BetaPropeller*→                                                                 | Pkinase+nSTAND1+TM+BetaPropeller              | 1222 | D6737_19790 | chloroflexi         | Chloroflexi bacterium         | hypothetical protein D6737_19790, partial [Chloroflexi bacterium].         | GCA_003695675.1 |
| RMH78629.1 | SIG+Trypsin+BetaPropeller→  <-TM<-?  CASPASE+nSTAND1+TM*→                                          | CASPASE+nSTAND1+TM                            | 828  | D6680_01360 | cyanobacteria       | Cyanobacteria bacterium J007  | caspase family protein, partial [Cyanobacteria bacterium J007].            | GCA_003695985.1 |



| acc            | operon                                                                                  | architecture                          | len  | gen.name                     | taxend              | species                        | define                                                                  | gca             |
|----------------|-----------------------------------------------------------------------------------------|---------------------------------------|------|------------------------------|---------------------|--------------------------------|-------------------------------------------------------------------------|-----------------|
| TCS45832.1     | nSTAND1+BetaPropeller*→                                                                 | nSTAND1+BetaPropeller                 | 1284 | EV585_125129                 | actinobacteria      | Streptomyces sp. BK335         | WD-40 repeat-containing protein [Streptomyces sp. BK335].               | GCA_004343515.1 |
| TDI65915.1     | TIR+DrHyd→ nSTAND1+TM+BetaPropeller*→                                                   | nSTAND1+TM+BetaPropeller              | 1178 | E2O88_09730                  | bacteroidetes       | Bacteroidetes bacterium        | hypothetical protein E2O88_09730 [Bacteroidetes bacterium].             | GCA_004356345.1 |
| TDX54622.1     | nSTAND1+TM+BetaPropeller*→                                                              | nSTAND1+TM+BetaPropeller              | 1232 | CLW03_1390                   | actinobacteria      | Streptomyces sp. 25            | WD40 repeat protein [Streptomyces sp. 25].                              | GCA_004365455.1 |
| TFG73542.1     | TIR→ nSTAND1*→                                                                          | nSTAND1                               | 184  | E4H26_09660                  | bacteroidetes       | Flavobacteriales bacterium     | hypothetical protein E4H26_09660, partial [Flavobacteriales bacterium]. | GCA_004525075.1 |
| TLU54259.1     | TIR+DrHyd→ nSTAND1+TPR*→                                                                | nSTAND1+TPR                           | 934  | FDX18_11420                  | chlorobi            | Chlorobium sp.                 | hypothetical protein FDX18_11420 [Chlorobium sp.].                      | GCA_005843805.1 |
| TMA13290.1     | SLATT→  <-?  TIR→ nSTAND1+TM+TM+TM*→                                                    | nSTAND1+TM+TM+TM                      | 677  | E6J89_01820                  | deltaproteobacteria | Deltaproteobacteria bacterium  | ATP-binding protein, partial [Deltaproteobacteria bacterium].           | GCA_005878685.1 |
| TMC17178.1     | TIR+nSTAND1+TM+Beta-helix*→                                                             | TIR+nSTAND1+TM+Beta-helix             | 948  | E6J34_19025                  | chloroflexi         | Chloroflexi bacterium          | TIR domain-containing protein, partial [Chloroflexi bacterium].         | GCA_005879655.1 |
| TMC23062.1     | nSTAND1+TM+Beta-helix→ Pkinase+TIR+nSTAND1+TM+Beta-helix*→?→  <-?<-?<-?<-?<-ABhydrolase | Pkinase+TIR+nSTAND1+TM+Beta-helix     | 1380 | E6J34_04260                  | chloroflexi         | Chloroflexi bacterium          | TIR domain-containing protein [Chloroflexi bacterium].                  | GCA_005879655.1 |
| TMD76903.1     | TIR+nSTAND1+TM*→                                                                        | TIR+nSTAND1+TM                        | 914  | E6I97_10225                  | chloroflexi         | Chloroflexi bacterium          | TIR domain-containing protein [Chloroflexi bacterium].                  | GCA_005880275.1 |
| TMD99845.1     | TIR+nSTAND1+TM*→                                                                        | TIR+nSTAND1+TM                        | 908  | E6I80_27410                  | chloroflexi         | Chloroflexi bacterium          | hypothetical protein E6I80_27410 [Chloroflexi bacterium].               | GCA_005881495.1 |
| TME05606.1     | TIR+nSTAND1+TM*→                                                                        | TIR+nSTAND1+TM                        | 884  | E6I80_16835                  | chloroflexi         | Chloroflexi bacterium          | TIR domain-containing protein, partial [Chloroflexi bacterium].         | GCA_005881495.1 |
| TMH35459.1     | TIR→ TIR+DrHyd→ nSTAND1+TM+TPR*→?→  <-?<-ABC-ATPase  ?→?→ Cluster106_3clades→           | nSTAND1+TM+TPR                        | 759  | E6H66_07570                  | betaproteobacteria  | Betaproteobacteria bacterium   | ATP-binding protein [Betaproteobacteria bacterium].                     | GCA_005882995.1 |
| TNF40174.1     | TIR→ nSTAND1+TM+prokYEATS*→                                                             | nSTAND1+TM+prokYEATS                  | 681  | EP310_09390                  | bacteroidetes       | Bacteroidetes bacterium        | hypothetical protein EP310_09390 [Bacteroidetes bacterium].             | GCA_006226805.1 |
| TQM00650.1     | nSTAND1+BetaPropeller*→                                                                 | nSTAND1+BetaPropeller                 | 1393 | FB559_6366                   | actinobacteria      | Actinoallomurus bryophytorum   | WD40 repeat protein [Actinoallomurus bryophytorum].                     | GCA_006716425.1 |
| VFJ52061.1     | nSTAND1+BetaPropeller*→?→?→ ABC-ATPase→                                                 | nSTAND1+BetaPropeller                 | 1305 | BECKFM1743C_GA0114221101051  | actinobacteria      | Candidatus Kentron sp. FM      | WD40 repeat [Candidatus Kentron sp. FM].                                | -               |
| VFJ73513.1     | TIR→ MoxR→?→ TIR→ nSTAND1+BetaPropeller*→?→ ABC-ATPase→                                 | nSTAND1+BetaPropeller                 | 1354 | BECKFW1821C_GA01142351105215 | actinobacteria      | Candidatus Kentron sp. FW      | WD40 repeat [Candidatus Kentron sp. FW].                                | -               |
| WP_006105558.1 | CASPASE+nSTAND1+BetaPropeller*→                                                         | CASPASE+nSTAND1+BetaPropeller         | 1249 | MC7420_RS35880               | cyanobacteria       | Coleofasciculus chthonoplastes | caspase family protein [Coleofasciculus chthonoplastes].                | GCF_000155555.1 |
| WP_006458142.1 | CASPASE+CASPASE+nSTAND1+BetaPropeller*→                                                 | CASPASE+CASPASE+nSTAND1+BetaPropeller | 1660 | S7335_RS22355                | cyanobacteria       | Synechococcus sp. PCC 7335     | caspase family protein [Synechococcus sp. PCC 7335].                    | GCF_000155595.1 |

| acc            | operon                                                                                                                                                       | architecture                          | len  | gen.name           | taxend              | species                   | define                                                                  | gca             |
|----------------|--------------------------------------------------------------------------------------------------------------------------------------------------------------|---------------------------------------|------|--------------------|---------------------|---------------------------|-------------------------------------------------------------------------|-----------------|
| WP_007305744.1 | <-Trypco1  ?→ CASPASE+nSTAND1*→                                                                                                                              | CASPASE+nSTAND1                       | 961  | CWAT-DRAFT_RS14705 | cyanobacteria       | Crocospaera watsonii      | pentapeptide repeat-containing protein [Crocospaera watsonii].          | GCF_000167195.1 |
| WP_008178364.1 | FAD-NAD-dep-oxidoreductase→  <-Trypco1  CASPASE+nSTAND1*→                                                                                                    | CASPASE+nSTAND1                       | 1005 | BI334_RS09780      | cyanobacteria       | Moorea producens          | caspase family protein [Moorea producens].                              | GCF_000211815.1 |
| WP_011141629.1 | <-SIG+Metallopeptidase  ?→  <-?<-?  CASPASE+CASPASE+nSTAND1+BetaPropeller*→  <-?<-?  ?→?→  <-?<-?  DinB_2+FGS→                                               | CASPASE+CASPASE+nSTAND1+BetaPropeller | 1730 | GLL_RS08460        | cyanobacteria       | Gloeobacter violaceus     | caspase family protein [Gloeobacter violaceus].                         | GCF_000011385.1 |
| WP_011142241.1 | ABhydrolase→  <-?<-?  CASPASE+CASPASE+nSTAND1+BetaPropeller*→?→?→?→ ABC-ATPase→                                                                              | CASPASE+CASPASE+nSTAND1+BetaPropeller | 1721 | GLL_RS11610        | cyanobacteria       | Gloeobacter violaceus     | caspase family protein [Gloeobacter violaceus].                         | GCF_000011385.1 |
| WP_011316937.1 | CASPASE+CASPASE+nSTAND1+BetaPropeller*→                                                                                                                      | CASPASE+CASPASE+nSTAND1+BetaPropeller | 1686 | AVA_RS00195        | cyanobacteria       | Nostocaceae               | MULTISPECIES: caspase family protein [Nostocaceae].                     | GCF_000204075.1 |
| WP_011318971.1 | CASPASE+NACHT+BetaPropeller→ CASPASE+nSTAND1+BetaPropeller*→?→ RVe+MutnpC→                                                                                   | CASPASE+nSTAND1+BetaPropeller         | 1240 | AVA_RS29445        | cyanobacteria       | Trichormus variabilis     | caspase family protein [Trichormus variabilis].                         | GCF_000204075.1 |
| WP_011319818.1 | <-REC<-SIG+Trypsin+PDZ<-HAD  ?→  <-HSP20  ?→ CASPASE+nSTAND1+BetaPropeller→ CASPASE+CASPASE+nSTAND1+BetaPropeller*→ PSE→  <-?<-?<-?  ?→  <-?  ?→ Na+ORC-AAA→ | CASPASE+CASPASE+nSTAND1+BetaPropeller | 1760 | AVA_RS15560        | cyanobacteria       | Nostocaceae               | MULTISPECIES: caspase family protein [Nostocaceae].                     | GCF_000204075.1 |
| WP_012163883.1 | CASPASE+CASPASE+nSTAND1+BetaPropeller*→                                                                                                                      | CASPASE+CASPASE+nSTAND1+BetaPropeller | 1703 | AM1_RS15835        | cyanobacteria       | Acaryochloris marina      | caspase family protein [Acaryochloris marina].                          | GCF_000018105.1 |
| WP_012165630.1 | Redoxin→ CASPASE+nSTAND1+TM*→                                                                                                                                | CASPASE+nSTAND1+TM                    | 1013 | AM1_RS24605        | cyanobacteria       | Acaryochloris marina      | caspase family protein [Acaryochloris marina].                          | GCF_000018105.1 |
| WP_015103078.1 | HTH+nSTAND1+TM+BetaPropeller*→  <-?<-PSE  NACHT→?→ NACHT→                                                                                                    | HTH+nSTAND1+TM+BetaPropeller          | 1307 | BN6_RS27490        | actinobacteria      | Saccharothrix espanaensis | helix-turn-helix domain-containing protein [Saccharothrix espanaensis]. | GCF_000328705.1 |
| WP_015104506.1 | nSTAND1+TM+BetaPropeller*→                                                                                                                                   | nSTAND1+TM+BetaPropeller              | 969  | BN6_RS34550        | actinobacteria      | Saccharothrix espanaensis | hypothetical protein [Saccharothrix espanaensis].                       | GCF_000328705.1 |
| WP_015118666.1 | EACC2+CASPASE+nSTAND1+BetaPropeller*→  <-PSE<-?<-?  ?→?→?→ Uma2→                                                                                             | EACC2+CASPASE+nSTAND1+BetaPropeller   | 1548 | RIV7116_RS12515    | cyanobacteria       | Rivularia sp. PCC 7116    | WD40 repeat domain-containing protein [Rivularia sp. PCC 7116].         | GCF_000316665.1 |
| WP_015158653.1 | nSTAND1+BetaPropeller*→                                                                                                                                      | nSTAND1+BetaPropeller                 | 1104 | CHA6605_RS06215    | cyanobacteria       | Chamaesiphon minutus      | WD40 repeat domain-containing protein [Chamaesiphon minutus].           | GCF_000317145.1 |
| WP_015205337.1 | CASPASE+CASPASE+nSTAND1+BetaPropeller*→                                                                                                                      | CASPASE+CASPASE+nSTAND1+BetaPropeller | 1759 | CRI9333_RS21890    | cyanobacteria       | Crinalium epipsammum      | caspase family protein [Crinalium epipsammum].                          | GCF_000317495.1 |
| WP_015210065.1 | <-Trypco1  CASPASE+nSTAND1+TM*→  <-?  ?→?→  <-?  Cluster108_2clades→                                                                                         | CASPASE+nSTAND1+TM                    | 895  | CYLST_RS22615      | cyanobacteria       | Cylindrospermum stagnale  | pentapeptide repeat-containing protein [Cylindrospermum stagnale].      | GCF_000317535.1 |
| WP_015691683.1 | nSTAND1+TM+BetaPropeller*→                                                                                                                                   | nSTAND1+TM+BetaPropeller              | 1119 | SGRA_RS05810       | bacteroidetes       | Saprospira grandis        | hypothetical protein [Saprospira grandis].                              | GCF_000250635.1 |
| WP_015724204.1 | TIR+DrHyd+TIR→ nSTAND1+TM+Ntox24+PDZ*→                                                                                                                       | nSTAND1+TM+Ntox24+PDZ                 | 1380 | DESPR_RS17200      | deltaproteobacteria | Desulfobulbus propionicus | YD repeat-containing protein [Desulfobulbus propionicus].               | GCF_000186885.1 |
| WP_015795480.1 | <-ABhydrolase<-?  HTH+nSTAND1+TM+BetaPropeller*→  <-nSTAND1                                                                                                  | HTH+nSTAND1+TM+BetaPropeller          | 1334 | CACI_RS46450       | actinobacteria      | Catenulispora acidiphila  | helix-turn-helix domain-containing protein [Catenulispora acidiphila].  | GCF_000024025.1 |
| WP_016952361.1 | ABC-ATPase→ Cluster158_2clades→<br>SIG+TM+TM+TM+TM+TM+TM→  <-Trypco1  CASPASE+nSTAND1+TM+BetaPropeller*→  <-?<-TM+HAMP+GAF+GAF+GAF+GAF+MCPsignal<-?<-REC     | CASPASE+nSTAND1+TM+BetaPropeller      | 1622 | ANA7108_RS0118800  | cyanobacteria       | Anabaena sp. PCC 7108     | caspase family protein [Anabaena sp. PCC 7108].                         | GCF_000332135.1 |

| acc            | operon                                                                                                                                       | architecture                          | len  | gen.name             | taxend         | species                         | define                                                                    | gca             |
|----------------|----------------------------------------------------------------------------------------------------------------------------------------------|---------------------------------------|------|----------------------|----------------|---------------------------------|---------------------------------------------------------------------------|-----------------|
| WP_016953798.1 | EACC2+CASPASE+nSTAND1+BetaPropeller*→?→?→?→?→ ParA-Soj-PloopNTPase→ ParB→                                                                    | EACC2+CASPASE+nSTAND1+BetaPropeller   | 1578 | ANA7108_RS0126175    | cyanobacteria  | Anabaena sp. PCC 7108           | CHAT domain-containing protein [Anabaena sp. PCC 7108].                   | GCF_000332135.1 |
| WP_017315667.1 | CASPASE→ nSTAND1+BetaPropeller→ nSTAND1*→                                                                                                    | nSTAND1                               | 312  | MAS10914_RS0109350   | cyanobacteria  | Mastigocladopsis repens         | ATP-binding protein [Mastigocladopsis repens].                            | GCF_000315565.1 |
| WP_017324258.1 | ABhydrolase→  <-Uma2<-Uma2  TIR+TIR→ SIG+nSTAND1+TM+BetaPropeller*→  <-?  ?→?→ ABC-ATPase→                                                   | SIG+nSTAND1+TM+BetaPropeller          | 1203 | SYN7336_RS02075      | cyanobacteria  | Synechococcus sp. PCC 7336      | hypothetical protein [Synechococcus sp. PCC 7336].                        | GCF_000332275.1 |
| WP_017652542.1 | SIG+TM+TM+TM+TM+TM→?→  <-?<-?  ?→  <-PSE  CASPASE+CASPASE+nSTAND1+BetaPropeller*→                                                            | CASPASE+CASPASE+nSTAND1+BetaPropeller | 1714 | MIC7126_RS0107600    | cyanobacteria  | Fortiea contorta                | caspase family protein [Fortiea contorta].                                | GCF_000332295.1 |
| WP_017712679.1 | Pkinase+TIR+DrHyd→  <-?<-?<-?  ?→?→ CASPASE+nSTAND1+BetaPropeller*→                                                                          | CASPASE+nSTAND1+BetaPropeller         | 1866 | PRO9006_RS0111975    | cyanobacteria  | Prochlorothrix hollandica       | hypothetical protein [Prochlorothrix hollandica].                         | GCF_000332315.1 |
| WP_017715273.1 | <-TM<-?  CASPASE+nSTAND1+TM+BetaPropeller*→?→ PSE→  <-?<-?<-ABhydrolase<-?<-ENOYCOADEHYD                                                     | CASPASE+nSTAND1+TM+BetaPropeller      | 1430 | OSC10802_RS38460     | cyanobacteria  | Oscillatoria sp. PCC 10802      | caspase family protein [Oscillatoria sp. PCC 10802].                      | GCF_000332335.1 |
| WP_017717001.1 | <-ACET<-?  ?→  <-?  ?→?→ EACC2+CASPASE+nSTAND1*→  <-?  ?→ PSE→  <-?  ?→?→  <-Pkinase+TPR                                                     | EACC2+CASPASE+nSTAND1                 | 829  | OSC10802_RS39855     | cyanobacteria  | Oscillatoria sp. PCC 10802      | CHAT domain-containing protein [Oscillatoria sp. PCC 10802].              | GCF_000332335.1 |
| WP_017717209.1 | CASPASE+CASPASE+nSTAND1+BetaPropeller*→                                                                                                      | CASPASE+CASPASE+nSTAND1+BetaPropeller | 1766 | OSC10802_RS0113050   | cyanobacteria  | Oscillatoria sp. PCC 10802      | caspase family protein [Oscillatoria sp. PCC 10802].                      | GCF_000332335.1 |
| WP_017720241.1 | <-S4+PSYN<-TM<-?<-TPR+TPR+TPR+CASPASE<-?<-TPR+TPR+TPR+TPR  ?→ EACC2+CASPASE+nSTAND1+IES1*→?→  <-?<-SIG+Trypsin<-?<-?  ?→  <-SIG+Pentapeptide | EACC2+CASPASE+nSTAND1+IES1            | 1048 | OSC10802_RS42290     | cyanobacteria  | Oscillatoria sp. PCC 10802      | DUF1822 family protein [Oscillatoria sp. PCC 10802].                      | GCF_000332335.1 |
| WP_018342883.1 | MED15→ TM+TM+TM+TM+TM+TM+TM+TM+TM+TM+TM+cNMP→ TIR→ nSTAND1+BetaPropeller*→                                                                   | nSTAND1+BetaPropeller                 | 1044 | A3EE_RS0107780       | bacteroidetes  | Cytophaga aurantiaca            | hypothetical protein [Cytophaga aurantiaca].                              | GCF_000379725.1 |
| WP_018504462.1 | nSTAND1+BetaPropeller*→                                                                                                                      | nSTAND1+BetaPropeller                 | 1541 | B056_RS0124325       | actinobacteria | Frankia discariae               | hypothetical protein [Frankia discariae].                                 | GCF_000373365.1 |
| WP_019487727.1 | <-AAA+TPR<-?<-?<-?<-PSE  ?→?→?→ nSTAND1+Pentapeptide*→                                                                                       | nSTAND1+Pentapeptide                  | 725  | OS-CIL6407_RS0123130 | cyanobacteria  | Kamptomena formosum             | pentapeptide repeat-containing protein [Kamptomena formosum].             | GCF_000332155.1 |
| WP_019492639.1 | CASPASE+CASPASE+nSTAND1+BetaPropeller*→                                                                                                      | CASPASE+CASPASE+nSTAND1+BetaPropeller | 1697 | CAL7103_RS0122950    | cyanobacteria  | Calothrix sp. PCC 7103          | caspase family protein [Calothrix sp. PCC 7103].                          | GCF_000331305.1 |
| WP_019493356.1 | <-REC<-PKinase+SWACOS+GAF+SHELIX+HISKIN+REC  Pentapeptide→ CASPASE+nSTAND1+TM+BetaPropeller*→  <-?<-?<-?<-PSE  MNS→                          | CASPASE+nSTAND1+TM+BetaPropeller      | 1446 | CAL7103_RS0126645    | cyanobacteria  | Calothrix sp. PCC 7103          | caspase family protein [Calothrix sp. PCC 7103].                          | GCF_000331305.1 |
| WP_023071899.1 | <-TrypcoI  CASPASE+nSTAND1+Pentapeptide*→                                                                                                    | CASPASE+nSTAND1+Pentapeptide          | 969  | N836_RS48210         | cyanobacteria  | Leptolyngbya sp. Heron Island J | pentapeptide repeat-containing protein [Leptolyngbya sp. Heron Island J]. | GCF_000482245.1 |
| WP_023173850.1 | CASPASE+CASPASE+nSTAND1+BetaPropeller*→                                                                                                      | CASPASE+CASPASE+nSTAND1+BetaPropeller | 1707 | GKIL_RS11810         | cyanobacteria  | Gloeobacter kilauensis          | caspase family protein [Gloeobacter kilauensis].                          | GCF_000484535.1 |
| WP_026073174.1 | CASPASE+nSTAND1+BetaPropeller→  <-?<-?  SIG+HTH+ACYC+APATPase+BetaPropeller→?→ nSTAND1+BetaPropeller*→  <-?<-?  ?→  <-Cluster510_2clades     | nSTAND1+BetaPropeller                 | 1233 | LEPTO7104_RS0128640  | cyanobacteria  | Nodosilinea nodulosa            | WD40 repeat domain-containing protein [Nodosilinea nodulosa].             | GCF_000309385.1 |
| WP_026316665.1 | nSTAND1+BetaPropeller*→  <-?<-?  ?→?→  <-?<-AraC-HTH+AraC-HTH                                                                                | nSTAND1+BetaPropeller                 | 1263 | C503_RS0124640       | actinobacteria | Actinokineospora enzanensis     | hypothetical protein [Actinokineospora enzanensis].                       | GCF_000374445.1 |
| WP_026735835.1 | <-TrypcoI  PASE+nSTAND1+TM+Pentapeptide*→                                                                                                    | PASE+nSTAND1+TM+Pentapeptide          | 969  | FIS9605_RS0129725    | cyanobacteria  | Fischerella sp. PCC 9605        | pentapeptide repeat-containing protein [Fischerella sp. PCC 9605].        | GCF_000517105.1 |
| WP_027844322.1 | CASPASE+CASPASE+nSTAND1+BetaPropeller*→?→?→?→?→ XisI→                                                                                        | CASPASE+CASPASE+nSTAND1+BetaPropeller | 1804 | BC008_RS42445        | cyanobacteria  | Mastigocoleus testarum          | caspase family protein [Mastigocoleus testarum].                          | GCF_001456025.1 |

| acc            | operon                                                                                                                                             | architecture                              | len  | gen.name               | taxend                 | species                          | define                                                                | gca             |
|----------------|----------------------------------------------------------------------------------------------------------------------------------------------------|-------------------------------------------|------|------------------------|------------------------|----------------------------------|-----------------------------------------------------------------------|-----------------|
| WP_027930056.1 | ACT→  <-ICLR-HTH<-ABhydrolase  Pkinase+TPR→ EACC1→ CASPASE+nSTAND1+TM+BetaPropeller*→                                                              | CASPASE+nSTAND1+TM+BetaPropeller          | 1457 | AMYTH_RS0109125        | actinobacteria         | Amycolatopsis thermoflava        | caspase family protein [Amycolatopsis thermoflava].                   | GCF_000473265.1 |
| WP_028922565.1 | ABhydrolase→ ABhydrolase→?→ nSTAND1+BetaPropeller+BetaPropeller*→ nSTAND1+TM+TPR→                                                                  | nSTAND1+BetaPropeller+BetaPropeller       | 1251 | N912_RS60190           | actinobacteria         | Pseudonocardia acaciae           | hypothetical protein [Pseudonocardia acaciae].                        | GCF_000620785.1 |
| WP_035149788.1 | <-Trypco1  CASPASE+nSTAND1+TM*→                                                                                                                    | CASPASE+nSTAND1+TM                        | 1012 | IJ00_RS02610           | cyanobacteria          | Calothrix sp. 336/3              | pentapeptide repeat-containing protein [Calothrix sp. 336/3].         | GCF_000734895.2 |
| WP_035956063.1 | SWC3+CASPASE+nSTAND1+TM+BetaPropeller*→ TIR+nSTAND1+BetaPropeller→                                                                                 | SWC3+CASPASE+nSTAND1+TM+BetaPropeller     | 1650 | FREUN1FDRAFT_RS33550   | actinobacteria         | Frankia sp. EUN1f                | hypothetical protein [Frankia sp. EUN1f].                             | GCF_000177675.1 |
| WP_038089860.1 | EACC2+CASPASE+nSTAND1+BetaPropeller*→                                                                                                              | EACC2+CASPASE+nSTAND1+BetaPropeller       | 1523 | HC643_RS24730          | cyanobacteria          | Tolypothrix bouteillei           | CHAT domain-containing protein [Tolypothrix bouteillei].              | GCF_000760695.4 |
| WP_038091175.1 | EACC2+CASPASE+nSTAND1+BetaPropeller*→                                                                                                              | EACC2+CASPASE+nSTAND1+BetaPropeller       | 1527 | bacteria>cyanobacteria | Tolypothrix bouteillei | -                                | 740250270                                                             | -               |
| WP_042222922.1 | nSTAND1+BetaPropeller*→?→?→ REC→ REC→  <-?<-?<-REC                                                                                                 | nSTAND1+BetaPropeller                     | 1227 | KALB_RS34215           | actinobacteria         | Kutzneria albida                 | hypothetical protein [Kutzneria albida].                              | GCF_000525635.1 |
| WP_044290980.1 | Pentapeptide→ CASPASE+nSTAND1+TM*→?→ BetaPropeller→                                                                                                | CASPASE+nSTAND1+TM                        | 817  | RIV7116_RS15845        | cyanobacteria          | Rivularia sp. PCC 7116           | caspase family protein [Rivularia sp. PCC 7116].                      | GCF_000316665.1 |
| WP_045225177.1 | TIR+DrHyd→ nSTAND1+FGS*→                                                                                                                           | nSTAND1+FGS                               | 817  | EK23_RS09735           | gammaproteobacteria    | Methyloterricola oryzae          | SUMF1/EgtB/PvdO family nonheme iron enzyme [Methyloterricola oryzae]. | GCF_000934725.1 |
| WP_045872156.1 | nSTAND1+BetaPropeller*→  <-?<-?  CASPASE→  <-?  CASPASE→  <-?<-MNS                                                                                 | nSTAND1+BetaPropeller                     | 1200 | FDU-TEX481_RS24680     | cyanobacteria          | Nostocales                       | MULTISPECIES: WD40 repeat domain-containing protein [Nostocales].     | GCF_002368275.1 |
| WP_046725303.1 | <-ABhydrolase<-?  ?→ nSTAND1+BetaPropeller*→  <-?<-SIG+TM+TM+TM+TM+TM<-SIG+TM+TM+TM+TM+TM  TRPR-HTH+PBPI→  <-TRPR-HTH+PBPI  ?→ SIG+TM+TM+TM+TM+TM→ | nSTAND1+BetaPropeller                     | 1285 | SXIM_RS26680           | actinobacteria         | Streptomyces xiamenensis         | PD40 domain-containing protein [Streptomyces xiamenensis].            | GCF_000993785.3 |
| WP_048709317.1 | SIG+TIR→ TIR+nSTAND1+RHS+RHS*→ PSE→?→?→?→  <-?  ?→ TIR→                                                                                            | TIR+nSTAND1+RHS+RHS                       | 1623 | HMMV_RS27495           | alphaproteobacteria    | Microvirga massiliensis          | TIR domain-containing protein [Microvirga massiliensis].              | GCF_902385745.1 |
| WP_049564506.1 | nSTAND1+BetaPropeller*→                                                                                                                            | nSTAND1+BetaPropeller                     | 1250 | ADY01_RS01750          | actinobacteria         | Streptomyces sp. SBT349          | hypothetical protein [Streptomyces sp. SBT349].                       | GCF_001083795.1 |
| WP_049565443.1 | REC→?→?→?→  <-?  ?→?→ SIG+nSTAND1+BetaPropeller*→?→?→  <-?<-?<-ABC-ATPase                                                                          | SIG+nSTAND1+BetaPropeller                 | 1425 | ADY59_RS23235          | actinobacteria         | Nonomurea sp. SBT364             | hypothetical protein [Nonomurea sp. SBT364].                          | GCF_001083785.1 |
| WP_049641845.1 | Patatin→?→?→ nSTAND1+TM+TPR*→  <-?  ?→  <-?<-Cluster157_3clades<-FAD-NAD-dep-oxidoreductase<-?<-Cluster428_2clades                                 | nSTAND1+TM+TPR                            | 945  | AIOL_RS04910           | alphaproteobacteria    | Candidatus Rhodobacter lobularis | hypothetical protein [Candidatus Rhodobacter lobularis].              | GCF_001078595.1 |
| WP_050045050.1 | CASPASE+nSTAND1+Pentapeptide+Pentapeptide*→                                                                                                        | CASPASE+nSTAND1+Pentapeptide+Pentapeptide | 1134 | bacteria>cyanobacteria | Tolypothrix bouteillei | -                                | 910240059                                                             | -               |
| WP_050366129.1 | nSTAND1+TM+BetaPropeller*→                                                                                                                         | nSTAND1+TM+BetaPropeller                  | 1266 | HS99_RS15320           | actinobacteria         | Kitasatospora aureofaciens       | WD40 repeat domain-containing protein [Kitasatospora aureofaciens].   | GCF_002082605.1 |
| WP_051169531.1 | SIG+TPR→ EACC1→ CASPASE+nSTAND1+TM+BetaPropeller*→                                                                                                 | CASPASE+nSTAND1+TM+BetaPropeller          | 1539 | ON19_RS32425           | actinobacteria         | Nocardia abscessus               | caspase family protein [Nocardia abscessus].                          | GCF_000308455.1 |
| WP_051292932.1 | TRPR-HTH+PBPI→?→ TIR+DrHyd→ nSTAND1+BetaPropeller*→                                                                                                | nSTAND1+BetaPropeller                     | 1067 | A37S_RS24150           | bacteroidetes          | Olivibacter sitiensis            | hypothetical protein [Olivibacter sitiensis].                         | GCF_000427965.1 |
| WP_051675149.1 | TRPR-HTH+PBPI→  <-?<-?<-?  nSTAND1+BetaPropeller*→  <-?<-?<-?  ABhydrolase→                                                                        | nSTAND1+BetaPropeller                     | 1279 | N545_RS24235           | actinobacteria         | Streptomyces sp. URHA0041        | PD40 domain-containing protein [Streptomyces sp. URHA0041].           | GCF_000701325.1 |

| acc            | operon                                                                                                           | architecture                              | len  | gen.name           | taxend              | species                         | define                                                                       | gca             |
|----------------|------------------------------------------------------------------------------------------------------------------|-------------------------------------------|------|--------------------|---------------------|---------------------------------|------------------------------------------------------------------------------|-----------------|
| WP_051737318.1 | EACC1→ CASPASE+nSTAND1+TM+BetaPropeller*→  <-TM                                                                  | CASPASE+nSTAND1+TM+BetaPropeller          | 1475 | OQ00_RS16195       | actinobacteria      | Pseudonocardia autotrophica     | WD40 repeat domain-containing protein [Pseudonocardia autotrophica].         | GCF_000717175.1 |
| WP_051766655.1 | CHTH+nSTAND1+BetaPropeller*→                                                                                     | CHTH+nSTAND1+BetaPropeller                | 1272 | OQ01_RS52670       | actinobacteria      | Saccharothrix syringae          | helix-turn-helix domain-containing protein [Saccharothrix syringae].         | GCF_009498035.1 |
| WP_051945655.1 | TIR+TM+BetaPropeller→  <-SIG+TIR<-?<-nSTAND1+TM<-TIR  TIR+DrHyd→ nSTAND1*→  <-?<-?  TIR→  <-TIR+nSTAND1          | nSTAND1                                   | 1322 | BV106_RS35440      | verrucomicrobia     | Verrucomicrobium sp. BvORR106   | ATP-binding protein [Verrucomicrobium sp. BvORR106].                         | GCF_000739655.1 |
| WP_052288432.1 | ABhydrolase→?→?→  <-?  ?→ nSTAND1+BetaPropeller*→  <-?  ABC-ATPase→ TM+TM+TM+TM+TM+TM→?→?→ TM+TM+TM→             | nSTAND1+BetaPropeller                     | 1340 | DYY88_RS24230      | bacteria            | Cyanobacteria                   | MULTISPECIES: hypothetical protein [Cyanobacteria].                          | GCF_000817775.2 |
| WP_052335365.1 | <-TM<-?  CASPASE+nSTAND1+TM+BetaPropeller*→ BetaPropeller→ PSE→?→?→  <-?<-RRM  ParA-Soj-PloopNTPase→ ParB→       | CASPASE+nSTAND1+TM+BetaPropeller          | 1092 | FDU-TEX481_RS45850 | cyanobacteria       | Tolypothrix sp. PCC 7601        | caspase family protein [Tolypothrix sp. PCC 7601].                           | GCF_000300115.1 |
| WP_052335392.1 | <-TM<-?  CASPASE+nSTAND1+Trypsin→?→ CASPASE+nSTAND1+BetaPropeller+BetaPropeller→ BetaPropeller→                  | CASPASE+nSTAND1+Trypsin                   | 1348 | FDU-TEX481_RS40400 | cyanobacteria       | Nostocales                      | MULTISPECIES: caspase family protein [Nostocales].                           | GCF_001548455.1 |
| WP_052335393.1 | CASPASE+nSTAND1+Trypsin*→                                                                                        | CASPASE+nSTAND1+Trypsin                   | 986  | FDU-TEX481_RS33325 | cyanobacteria       | Nostocales                      | MULTISPECIES: trypsin-like peptidase domain-containing protein [Nostocales]. | GCF_001548455.1 |
| WP_052490005.1 | EAD4+nSTAND1+BetaPropeller*→  <-pPIWI+MID+RNaseH<-pPIWI+DnaA-AAA+AAA<-pPIWI                                      | EAD4+nSTAND1+BetaPropeller                | 1298 | SD81_RS16770       | cyanobacteria       | Tolypothrix campylonemoides     | AAA family ATPase [Tolypothrix campylonemoides].                             | GCF_000828075.3 |
| WP_052490177.1 | ParA-Soj-PloopNTPase→  <-?<-?<-?  PSE→  <-?  nSTAND1*→ PSE→ BetaPropeller→                                       | nSTAND1                                   | 394  | SD81_RS06920       | cyanobacteria       | Tolypothrix campylonemoides     | hypothetical protein [Tolypothrix campylonemoides].                          | GCF_000828075.3 |
| WP_052490698.1 | <-TM<-?  CASPASE+nSTAND1+BetaPropeller*→?→?→  <-?<-?<-PSE<-PSE  ?→?→ TPR+CASPASE→                                | CASPASE+nSTAND1+BetaPropeller             | 889  | SD81_RS38450       | cyanobacteria       | Tolypothrix campylonemoides     | caspase family protein [Tolypothrix campylonemoides].                        | GCF_000828075.3 |
| WP_052508296.1 | CASPASE→ nSTAND1+TM*→                                                                                            | nSTAND1+TM                                | 800  | SP67_RS33610       | cyanobacteria       | Mastigocladus laminosus         | pentapeptide repeat-containing protein [Mastigocladus laminosus].            | GCF_000934435.1 |
| WP_052596711.1 | <-ABhydrolase  ?→ nSTAND1+TM+BetaPropeller*→                                                                     | nSTAND1+TM+BetaPropeller                  | 1134 | CG11_RS12640       | bacteroidetes       | Aureispira sp. CCB-QB1          | hypothetical protein [Aureispira sp. CCB-QB1].                               | GCF_000724545.1 |
| WP_052668847.1 | wHTH-4stranded+TPRs+nSTAND1+BetaPropeller*→  <-?  ?→?→?→  <-ABhydrolase<-TPR                                     | wHTH-4stranded+TPRs+nSTAND1+BetaPropeller | 1431 | NITAL_RS24320      | actinobacteria      | Nitriliruptor alkaliphilus      | hypothetical protein [Nitriliruptor alkaliphilus].                           | GCF_000969705.1 |
| WP_052691807.1 | TIR→ nSTAND1+TM+TM+TM+TM+TM*→                                                                                    | nSTAND1+TM+TM+TM+TM+TM                    | 926  | K380_RS22645       | gammaproteobacteria | Cellvibrionaceae bacterium Bs12 | RDD family protein [Cellvibrionaceae bacterium Bs12].                        | GCF_000966245.1 |
| WP_053662778.1 | <-Pkinase+PASTA  ?→ PSE→?→ nSTAND1+BetaPropeller*→                                                               | nSTAND1+BetaPropeller                     | 1284 | ADK64_RS26775      | actinobacteria      | Streptomyces sp. MMG1121        | hypothetical protein [Streptomyces sp. MMG1121].                             | GCF_001280015.1 |
| WP_054153119.1 | TIR→ nSTAND1+TM+TM+TM+TM+TM*→?→?→  <-?  ?→  <-Na+ORC-AAA<-?  ParA-Soj-PloopNTPase→                               | nSTAND1+TM+TM+TM+TM+TM                    | 1122 | D621_RS07050       | betaproteobacteria  | beta proteobacterium AAP51      | RDD family protein [beta proteobacterium AAP51].                             | GCF_001295905.1 |
| WP_054290262.1 | <-p450<-?<-ABC-ATPase  ?→  <-AraC-HTH+AraC-HTH  PSE→  <-?  nSTAND1+TM+BetaPropeller*→ REC→  <-?<-?  ?→  <-?<-REC | nSTAND1+TM+BetaPropeller                  | 960  | AOZ06_RS16850      | actinobacteria      | Kibdelosporangium phytohabitans | PD40 domain-containing protein [Kibdelosporangium phytohabitans].            | GCF_001302585.1 |
| WP_055568262.1 | nSTAND1+BetaPropeller*→                                                                                          | nSTAND1+BetaPropeller                     | 1173 | AOK03_RS28690      | actinobacteria      | Streptomyces atriruber          | hypothetical protein [Streptomyces atriruber].                               | GCF_001418325.1 |

| acc            | operon                                                                                                                | architecture                          | len  | gen.name        | taxend              | species                                | define                                                                                             | gca             |
|----------------|-----------------------------------------------------------------------------------------------------------------------|---------------------------------------|------|-----------------|---------------------|----------------------------------------|----------------------------------------------------------------------------------------------------|-----------------|
| WP_057232519.1 | nSTAND1+BetaPropeller*→?→  <-ABhydrolase                                                                              | nSTAND1+BetaPropeller                 | 1319 | ASC99_RS15845   | actinobacteria      | unclassified Kitasatospora             | MULTISPECIES:<br>hypothetical protein<br>[unclassified<br>Kitasatospora].                          | GCF_001424875.1 |
| WP_058184087.1 | EAD10+nSTAND1+TM+BetaPropeller*→ CASPASE→                                                                             | EAD10+nSTAND1+TM+BetaPropeller        | 1369 | BC008_RS28055   | cyanobacteria       | Mastigocoleus testarum                 | WD40 repeat<br>domain-containing protein<br>[Mastigocoleus testarum].                              | GCF_001456025.1 |
| WP_058883925.1 | <-REC<-?<-?  CASPASE+nSTAND1+BetaPropeller*→                                                                          | CASPASE+nSTAND1+BetaPropeller         | 1732 | AVR62_RS18820   | cyanobacteria       | Oscillatoriales<br>cyanobacterium MTP1 | PD40 domain-containing<br>protein [Oscillatoriales<br>cyanobacterium MTP1].                        | GCF_001482745.2 |
| WP_058941697.1 | ABhydrolase→?→ nSTAND1+BetaPropeller*→  <-?  ?→ ABhydrolase→                                                          | nSTAND1+BetaPropeller                 | 1281 | ATE80_RS09355   | actinobacteria      | Streptomyces kanasensis                | WD40 repeat<br>domain-containing protein<br>[Streptomyces kanasensis].                             | GCF_001484625.1 |
| WP_062291516.1 | RVe+MutnpC→?→?→  <-TM<-?  CASPASE+nSTAND1+TM*→?→  <-?  ?→?→?→ REC→                                                    | CASPASE+nSTAND1+TM                    | 853  | ACX27_RS09860   | cyanobacteria       | Nostoc piscinale                       | caspace family protein<br>[Nostoc piscinale].                                                      | GCF_001298445.1 |
| WP_062716636.1 | nSTAND1+BetaPropeller*→  <-?<-PSE<-?<-?<-?<-?<-?<-ROK-HTH                                                             | nSTAND1+BetaPropeller                 | 1299 | AQJ67_RS04560   | actinobacteria      | Streptomyces caeruleatus               | WD40 repeat<br>domain-containing protein<br>[Streptomyces caeruleatus].                            | GCF_001514235.1 |
| WP_066377691.1 | XisI→  <-?<-HAD  ?→  <-HSP20<-PSE  ?→ PSE→?→ CASPASE+CASPASE+nSTAND1+BetaPropeller*→  <-?  ?→  <-SIG+TPR              | CASPASE+CASPASE+nSTAND1+BetaPropeller | 1750 | A3776_RS06945   | cyanobacteria       | Anabaena sp. CA = ATCC<br>33047        | caspace family protein<br>[Anabaena sp. CA =<br>ATCC 33047].                                       | GCF_001597855.1 |
| WP_067768577.1 | <-SIG+TPR  ABC-ATPase→?→  <-?<-?<-?<-?<-Trypco1  CASPASE+nSTAND1+TM+BetaPropeller*→  <-?  ?→  <-?<-?<-ABC-ATPase      | CASPASE+nSTAND1+TM+BetaPropeller      | 1611 | NOS3756_RS11575 | cyanobacteria       | Nostoc sp. NIES-3756                   | caspace family protein<br>[Nostoc sp. NIES-3756].                                                  | GCF_001548375.1 |
| WP_068382524.1 | CASPASE+CASPASE+nSTAND1+BetaPropeller*→ Uma2→  <-?  ?→?→ SIG+TM+TM+TM+TM+TM→                                          | CASPASE+CASPASE+nSTAND1+BetaPropeller | 1612 | LEP3755_RS08100 | cyanobacteria       | Leptolyngbya sp.<br>NIES-3755          | caspace family protein<br>[Leptolyngbya sp.<br>NIES-3755].                                         | GCF_001548435.1 |
| WP_068789388.1 | nSTAND1+TM+BetaPropeller*→  <-REC                                                                                     | nSTAND1+TM+BetaPropeller              | 1292 | AY600_RS10555   | cyanobacteria       | Phormidium willei                      | WD40 repeat<br>domain-containing protein<br>[Phormidium willei].                                   | GCF_001637315.1 |
| WP_069068225.1 | RRM→?→ Pkinase+TPR→?→?→ nSTAND1+BetaPropeller*→?→ PSE→ SIG+Pentapeptide→?→  <-?<-?<-zinc_ribbon_2+Pkinase+TM+TM+TM+TM | nSTAND1+BetaPropeller                 | 1225 | A4S05_RS02400   | cyanobacteria       | Nostoc sp. KVJ20                       | WD40 repeat<br>domain-containing protein<br>[Nostoc sp. KVJ20].                                    | GCF_001712795.1 |
| WP_069471539.1 | ACT→?→?→?→ tRNA→ tRNA→?→  <-SIG+ApbE  ?→ nSTAND1+TM+BetaPropeller→?→?→ nSTAND1+BetaPropeller→                         | nSTAND1+TM+BetaPropeller              | 1371 | BHU68_RS00110   | gammaproteobacteria | Candidatus Marithrix sp.<br>Canyon 246 | WD40 repeat<br>domain-containing protein<br>[Candidatus Marithrix sp.<br>Canyon 246].              | GCF_001723675.1 |
| WP_069471542.1 | nSTAND1+BetaPropeller*→                                                                                               | nSTAND1+BetaPropeller                 | 1154 | BHU68_RS00095   | gammaproteobacteria | Candidatus Marithrix sp.<br>Canyon 246 | hypothetical protein<br>[Candidatus Marithrix sp.<br>Canyon 246].                                  | GCF_001723675.1 |
| WP_069472735.1 | S4+PSYN→?→?→ nSTAND1+BetaPropeller*→                                                                                  | nSTAND1+BetaPropeller                 | 1471 | BHU65_RS01520   | gammaproteobacteria | Candidatus Marithrix sp.<br>Canyon 246 | ABC transporter<br>substrate-binding protein,<br>partial [Candidatus<br>Marithrix sp. Canyon 246]. | GCF_001723755.1 |
| WP_069775370.1 | <-AraC-HTH+AraC-HTH  ?→ HTH+nSTAND1+TM+BetaPropeller*→ SIG+NLPC→                                                      | HTH+nSTAND1+TM+BetaPropeller          | 1301 | BGM19_RS05250   | actinobacteria      | Streptomyces agglomeratus              | helix-turn-helix<br>domain-containing protein<br>[Streptomyces<br>agglomeratus].                   | GCF_001746475.1 |
| WP_071926783.1 | EACC1→ CASPASE+nSTAND1+BetaPropeller*→?→  <-?<-?  PSE→  <-?<-TM+TM+TM+TM+TM+TM<-ABC-ATPase                            | CASPASE+nSTAND1+BetaPropeller         | 1400 | BOX37_RS06100   | actinobacteria      | Nocardia mangyaensis                   | hypothetical protein<br>[Nocardia mangyaensis].                                                    | GCF_001886715.1 |

| acc            | operon                                                                                                                          | architecture                                           | len  | gen.name                | taxend                  | species                        | define                                                                       | gca             |
|----------------|---------------------------------------------------------------------------------------------------------------------------------|--------------------------------------------------------|------|-------------------------|-------------------------|--------------------------------|------------------------------------------------------------------------------|-----------------|
| WP_073484145.1 | HTH+nSTAND1+TM+BetaPropeller*→                                                                                                  | HTH+nSTAND1+TM+BetaPropeller                           | 1258 | BUE43_RS16570           | actinobacteria          | Streptoalloteichus hindustanus | helix-turn-helix domain-containing protein [Streptoalloteichus hindustanus]. | GCF_900129375.1 |
| WP_073549910.1 | CASPASE+CASPASE+nSTAND1+BetaPropeller*→ SIG+TPR→                                                                                | CASPASE+CASPASE+nSTAND1+BetaPropeller                  | 1691 | NIES1031_RS13280        | cyanobacteria           | Chroogloeocystis siderophila   | caspase family protein [Chroogloeocystis siderophila].                       | GCF_001904655.1 |
| WP_073619116.1 | Pentapeptide→?→?→?→  <-Trypco1  CASPASE+nSTAND1+Pentapeptide+Pentapeptide+Pentapeptide*→                                        | CASPASE+nSTAND1+Pentapeptide+Pentapeptide+Pentapeptide | 1155 | NIES2101_RS45020        | cyanobacteria           | Calothrix sp. HK-06            | pentapeptide repeat-containing protein [Calothrix sp. HK-06].                | GCF_001904745.1 |
| WP_075128359.1 | HTH+nSTAND1+TM+BetaPropeller*→                                                                                                  | HTH+nSTAND1+TM+BetaPropeller                           | 1232 | BU204_RS25880           | actinobacteria          | Actinophytocola xanthii        | helix-turn-helix domain-containing protein [Actinophytocola xanthii].        | GCF_001921205.1 |
| WP_075900997.1 | <-ABhydrolase  ?→?→?→  <-Trypco1  CASPASE+nSTAND1+TM+BetaPropeller*→                                                            | CASPASE+nSTAND1+TM+BetaPropeller                       | 1830 | BJP37_RS36840           | cyanobacteria           | Moorea bouillonii              | caspase family protein [Moorea bouillonii].                                  | GCF_001942495.1 |
| WP_075905263.1 | CASPASE+nSTAND1+BetaPropeller*→  <-?  MED15→  <-?<-Uma2                                                                         | CASPASE+nSTAND1+BetaPropeller                          | 1452 | BJP37_RS32685           | cyanobacteria           | Moorea bouillonii              | caspase family protein [Moorea bouillonii].                                  | GCF_001942495.1 |
| WP_076082468.1 | nSTAND1*→  <-?  PSE→  <-ACET  ?→  <-?<-VWA<-MoxR-AAA                                                                            | nSTAND1                                                | 584  | AV521_RS01825           | actinobacteria          | Streptomyces sp. IMTB 2501     | ATP-binding protein [Streptomyces sp. IMTB 2501].                            | GCF_001953885.1 |
| WP_076440611.1 | nSTAND1+BetaPropeller*→  <-?<-ParA-Soj-PloopNTPase                                                                              | nSTAND1+BetaPropeller                                  | 1266 | BXA11_RS32200           | actinobacteria          | Microbispora rosea             | hypothetical protein [Microbispora rosea].                                   | GCF_900156315.1 |
| WP_076985819.1 | Pkinase→  <-?  ?→?→?→  <-?  PSE→  <-?  HTH+nSTAND1+BetaPropeller*→                                                              | HTH+nSTAND1+BetaPropeller                              | 1262 | ALI144C_RS05040         | actinobacteria          | Actinosynnema sp. ALI-1.44     | PD40 domain-containing protein [Actinosynnema sp. ALI-1.44].                 | GCF_001984155.1 |
| WP_078616701.1 | HTH+nSTAND1+TM+BetaPropeller*→                                                                                                  | HTH+nSTAND1+TM+BetaPropeller                           | 1390 | H295_RS0120055          | actinobacteria          | Streptomyces sp. 351MFTsu5.1   | helix-turn-helix domain-containing protein [Streptomyces sp. 351MFTsu5.1].   | GCF_000383655.1 |
| WP_078831679.1 | TIR+DrHyd→ nSTAND1+BetaPropeller*→                                                                                              | nSTAND1+BetaPropeller                                  | 1025 | B5D42_RS11600           | bacteroidetes           | Sediminibacterium ginsengisoli | hypothetical protein [Sediminibacterium ginsengisoli].                       | GCF_900167075.1 |
| WP_079315441.1 | <-ABC-ATPase<-ABC-ATPase<-?<-PSE<-?<-PSE<-?  ?→ nSTAND1+BetaPropeller*→  <-PSE<-?<-tRNA<-tRNA<-?<-SIG+PDZ+LonC<-?<-?  ?→ NUDIX→ | nSTAND1+BetaPropeller                                  | 1250 | B1L11_RS17305           | actinobacteria          | Microbispora sp. GKU 823       | hypothetical protein [Microbispora sp. GKU 823].                             | GCF_002027145.1 |
| WP_079432573.1 | <-ICP80Bfold  ?→?→?→?→ TIR+DrHyd→ nSTAND1+BetaPropeller*→                                                                       | nSTAND1+BetaPropeller                                  | 1076 | B4920_RS00090           | betaproteobacteria      | Zoogloea sp. LCSB751           | WD40 repeat domain-containing protein [Zoogloea sp. LCSB751].                | GCF_002028455.1 |
| WP_080045844.1 | ENOYCOADEHYD→  <-?<-?<-?<-?<-?<-?  nSTAND1+BetaPropeller*→  <-?<-?<-?<-?  ?→ Pkinase→                                           | nSTAND1+BetaPropeller                                  | 1207 | BKM31_RS55895           | actinobacteria          | Nonomurea sp. ATCC 55076       | hypothetical protein [Nonomurea sp. ATCC 55076].                             | GCF_002057455.1 |
| WP_080808279.1 | <-NACHT  ?→  <-PSE<-?<-?  PSE→ PSE→  <-?  ?→ nSTAND1*→ nSTAND1+TM+TPR→?→?→?→  <-PSE  Uma2→                                      | nSTAND1                                                | 353  | XM38_RS18855            | cyanobacteria           | Halomiconema hongdechloris     | ATP-binding protein [Halomiconema hongdechloris].                            | GCF_002075285.3 |
| WP_081771813.1 | TIR+TIR→ nSTAND1+BetaPropeller*→ SLATT+SLATT→                                                                                   | nSTAND1+BetaPropeller                                  | 1486 | A3CW_RS50325            | betaproteobacteria      | Paraburkholderia nodosa        | AAA family ATPase [Paraburkholderia nodosa].                                 | GCF_000519185.1 |
| WP_083582706.1 | <-REC<-PSE  ?→  <-?<-Trypco1  CASPASE+nSTAND1*→                                                                                 | CASPASE+nSTAND1                                        | 995  | BRW63_RS04300           | cyanobacteria           | Phormidesmis priestleyi        | caspase family protein [Phormidesmis priestleyi].                            | GCF_001895925.1 |
| WP_084556682.1 | HTH+nSTAND1+BetaPropeller*→                                                                                                     | HTH+nSTAND1+BetaPropeller                              | 1331 | bacteria>actinobacteria | Couchioplanes caeruleus | -                              | 1181239683                                                                   | -               |
| WP_086168347.1 | <-S1COLD  ?→ nSTAND1+BetaPropeller*→?→  <-?<-?<-CASPASE+nSTAND1+BetaPropeller<-?<-EACC1                                         | nSTAND1+BetaPropeller                                  | 1276 | OQI_RS06360             | actinobacteria          | Streptomyces pharetrae         | hypothetical protein [Streptomyces pharetrae].                               | GCF_002128465.1 |

| acc            | operon                                                                                                           | architecture                          | len           | gen.name      | taxend              | species                                            | define                                                                                                | gca             |
|----------------|------------------------------------------------------------------------------------------------------------------|---------------------------------------|---------------|---------------|---------------------|----------------------------------------------------|-------------------------------------------------------------------------------------------------------|-----------------|
| WP_086476322.1 | TIR→ nSTAND1+TM*→                                                                                                | nSTAND1+TM                            | 707           | BV214_RS04690 | bacteroidetes       | Arenibacter sp. AK53                               | hypothetical protein [Arenibacter sp. AK53].                                                          | GCF_002150785.1 |
| WP_086667199.1 | <-HAD<-?  ?→?→  <-?<-ABC-ATPase  ?→ nSTAND1+TM+BetaPropeller*→                                                   | nSTAND1+TM+BetaPropeller              | 945           | B0F77_RS34380 | actinobacteria      | Lentzea kentuckyensis                              | hypothetical protein [Lentzea kentuckyensis].                                                         | GCF_002150765.1 |
| WP_086687140.1 | SIG+HOP2→  <-ABhydrolase<-?<-?  ?→?→ nSTAND1+BetaPropeller*→  <-?<-?<-?<-ABhydrolase                             | nSTAND1+BetaPropeller                 | 1159          | BV372_RS14140 | cyanobacteria       | Nostoc sp. T09                                     | AAA family ATPase [Nostoc sp. T09].                                                                   | GCF_002154695.1 |
| WP_086756226.1 | <-Trypco1  CASPASE+nSTAND1+BetaPropeller*→                                                                       | CASPASE+nSTAND1+BetaPropeller         | 906           | BV375_RS00710 | cyanobacteria       | Nostoc sp. 106C                                    | caspase family protein [Nostoc sp. 106C].                                                             | GCF_002154725.1 |
| WP_087545319.1 | <-Cluster158_2clades<-?  ?→ SLATT→ TIR+DrHyd→ nSTAND1+BetaPropeller*→  <-PSE  ?→  <-?<-?<-HxxxH                  | nSTAND1+BetaPropeller                 | 1320          | BZZ01_RS31645 | cyanobacteria       | Nostocales cyanobacterium HT-58-2                  | hypothetical protein [Nostocales cyanobacterium HT-58-2].                                             | GCF_002163975.1 |
| WP_090879784.1 | <-ParA-Soj-PloopNTPase<-?  ?→  <-PSE<-?  ?→  <-?  TIR+DrHyd+TIR→ nSTAND1+EP1*→                                   | nSTAND1+EP1                           | 2283          | BLT60_RS20960 | alphaproteobacteria | Bauldia litoralis                                  | hypothetical protein [Bauldia litoralis].                                                             | GCF_900104485.1 |
| WP_090933370.1 | <-wHTH-4stranded+TPRs+APATPase  HTH+nSTAND1+TM+BetaPropeller*→                                                   | HTH+nSTAND1+TM+BetaPropeller          | 1266          | BLS95_RS20045 | actinobacteria      | Nonomurea jiangxiensis                             | hypothetical protein [Nonomurea jiangxiensis].                                                        | GCF_900099965.1 |
| WP_090944045.1 | SIG+Trypsin+PDZ→  <-?<-?  ?→?→  <-ABhydrolase<-?  nSTAND1+TM+BetaPropeller*→  <-?<-?<-?<-?  ?→  <-HTH+MED15<-ACT | nSTAND1+TM+BetaPropeller              | 1222          | BLS95_RS39570 | actinobacteria      | Nonomurea jiangxiensis                             | hypothetical protein [Nonomurea jiangxiensis].                                                        | GCF_900099965.1 |
| WP_091280677.1 | CASPASE+nSTAND1+TM+BetaPropeller*→                                                                               | CASPASE+nSTAND1+TM+BetaPropeller      | 1556          | AWX74_RS22975 | actinobacteria      | Frankia irregularis                                | WD40 repeat domain-containing protein [Frankia irregularis].                                          | GCF_001536285.1 |
| WP_091294574.1 | nSTAND1+TM+BetaPropeller*→                                                                                       | nSTAND1+TM+BetaPropeller              | 1264          | BLV57_RS30410 | actinobacteria      | Amycolatopsis xylanica                             | hypothetical protein [Amycolatopsis xylanica].                                                        | GCF_900107045.1 |
| WP_092636218.1 | ABC-ATPase→ ABC-ATPase→ TIR→ nSTAND1+TM+TPR+TPR+TPR+TPR+TPR*→?→  <-?<-AraC-HTH+AraC-HTH                          | nSTAND1+TM+TPR+TPR+TPR+TPR+TPR1612    | BLV06_RS20590 | BLV06_RS20590 | alphaproteobacteria | Rhizobiales bacterium GAS113                       | ATP-binding protein [Rhizobiales bacterium GAS113].                                                   | GCF_900103895.1 |
| WP_092980844.1 | SLATT→ TIR→ nSTAND1+TM*→  <-?<-?<-TPR                                                                            | nSTAND1+TM                            | 809           | BM318_RS03935 | bacteroidetes       | Robiginitalea myxolifaciens                        | hypothetical protein [Robiginitalea myxolifaciens].                                                   | GCF_900115205.1 |
| WP_093158527.1 | nSTAND1+BetaPropeller*→                                                                                          | nSTAND1+BetaPropeller                 | 1257          | ATL45_RS01025 | actinobacteria      | Saccharopolyspora antimicrobica                    | AAA family ATPase [Saccharopolyspora antimicrobica].                                                  | GCF_900114905.1 |
| WP_093269708.1 | ACET→  <-?<-?  ?→ CASPASE+nSTAND1+TM+BetaPropeller*→                                                             | CASPASE+nSTAND1+TM+BetaPropeller      | 1659          | BLW84_RS25305 | actinobacteria      | Saccharopolyspora shandongensis                    | caspase family protein [Saccharopolyspora shandongensis].                                             | -               |
| WP_094341574.1 | Trypsin+nSTAND1+BetaPropeller*→                                                                                  | Trypsin+nSTAND1+BetaPropeller         | 1438          | CDG79_RS07440 | cyanobacteria       | Nostoc sp. 'Peltigera membranacea cyanobiont' 232  | trypsin-like peptidase domain-containing protein [Nostoc sp. 'Peltigera membranacea cyanobiont' 232]. | GCF_002245985.1 |
| WP_094349283.1 | nSTAND1+BetaPropeller→?→  <-Trypco1  CASPASE+nSTAND1+TM+BetaPropeller*→                                          | CASPASE+nSTAND1+TM+BetaPropeller      | 1387          | CDG76_RS12330 | cyanobacteria       | Nostoc sp. 'Peltigera membranacea cyanobiont' 210A | caspase family protein [Nostoc sp. 'Peltigera membranacea cyanobiont' 210A].                          | GCF_002246015.1 |
| WP_094555851.1 | TIR+DrHyd→ nSTAND1+BetaPropeller+BetaPropeller*→                                                                 | nSTAND1+BetaPropeller+BetaPropeller   | 1242          | CJZ82_RS11170 | cyanobacteria       | Synechococcus sp. 1G10                             | hypothetical protein [Synechococcus sp. 1G10].                                                        | GCF_002252625.1 |
| WP_095722688.1 | CASPASE+CASPASE+nSTAND1+BetaPropeller*→                                                                          | CASPASE+CASPASE+nSTAND1+BetaPropeller | 1706          | CK510_RS16200 | cyanobacteria       | Calothrix elsteri                                  | caspase family protein [Calothrix elsteri].                                                           | GCF_002289455.1 |
| WP_096542102.1 | <-Trypco1  CASPASE+nSTAND1+Pentapeptide*→?→?→ XisI→                                                              | CASPASE+nSTAND1+Pentapeptide          | 996           | CA726_RS33005 | cyanobacteria       | Nostoc linckia                                     | pentapeptide repeat-containing protein [Nostoc linckia].                                              | GCF_002368035.1 |
| WP_096556689.1 | <-HAD  ?→  <-HSP20  ?→  <-REC<-?  CASPASE+CASPASE+nSTAND1+BetaPropeller*→                                        | CASPASE+CASPASE+nSTAND1+BetaPropeller | 1739          | CDC32_RS19410 | cyanobacteria       | Nostoc sp. NIES-4103                               | caspase family protein [Nostoc sp. NIES-4103].                                                        | GCF_002368335.1 |

| acc            | operon                                                                                                                   | architecture                          | len  | gen.name                | taxend             | species                                          | define                                                                             | gca             |
|----------------|--------------------------------------------------------------------------------------------------------------------------|---------------------------------------|------|-------------------------|--------------------|--------------------------------------------------|------------------------------------------------------------------------------------|-----------------|
| WP_096563584.1 | HSP20→  <-ABhydrolase  ?→  <-PSE  ?→?→ nSTAND1+BetaPropeller+TPR*→ CASPASE→?→  <-?<-?  ABhydrolase→                      | nSTAND1+BetaPropeller+TPR             | 1393 | CDC39_RS16830           | cyanobacteria      | Scytonema sp. NIES-4073                          | hypothetical protein [Scytonema sp. NIES-4073].                                    | GCF_002368435.1 |
| WP_096586192.1 | Pentapeptide→ nSTAND1+BetaPropeller*→  <-?  ?→  <-TM+TM+NACHT+FGS+GUN4<-CASPASE  ?→  <-PSE<-?<-ParA-Soj-PloopNTPase      | nSTAND1+BetaPropeller                 | 1298 | CA723_RS30235           | cyanobacteria      | Anabaenopsis circularis                          | PD40 domain-containing protein [Anabaenopsis circularis].                          | GCF_002367975.1 |
| WP_096624791.1 | Redoxin→  <-?<-?<-?  ?→?→?→ CASPASE+CASPASE+nSTAND1+BetaPropeller*→  <-?<-?  ?→ SIG+Pentapeptide→?→ ncRNA→  <-REC        | CASPASE+CASPASE+nSTAND1+BetaPropeller | 1715 | CDC37_RS20940           | cyanobacteria      | Calothrix sp. NIES-3974                          | caspase family protein [Calothrix sp. NIES-3974].                                  | GCF_002368395.1 |
| WP_096641665.1 | <-Cluster108_2clades  TPR+CASPASE→ CASPASE+nSTAND1+FGS*→                                                                 | CASPASE+nSTAND1+FGS                   | 1012 | CA724_RS00570           | cyanobacteria      | Calothrix brevissima                             | SUMF1/EgtB/PvdO family nonheme iron enzyme [Calothrix brevissima].                 | GCF_002367995.1 |
| WP_096655823.1 | Pentapeptide→ CASPASE+nSTAND1+TM*→                                                                                       | CASPASE+nSTAND1+TM                    | 767  | CA729_RS11090           | cyanobacteria      | Calothrix parasitica                             | caspase family protein [Calothrix parasitica].                                     | GCF_002368095.1 |
| WP_096661654.1 | RVT→?→?→?→  <-?<-Trypco1  CASPASE+nSTAND1+Pentapeptide*→  <-NACHT+BetaPropeller                                          | CASPASE+nSTAND1+Pentapeptide          | 991  | CA729_RS36575           | cyanobacteria      | Calothrix parasitica                             | pentapeptide repeat-containing protein [Calothrix parasitica].                     | GCF_002368095.1 |
| WP_096677027.1 | <-TM<-?  CASPASE+nSTAND1+BetaPropeller*→  <-?<-?<-?  ?→  <-?<-?  HxxxH→                                                  | CASPASE+nSTAND1+BetaPropeller         | 1263 | CDC30_RS18535           | cyanobacteria      | Fischerella sp. NIES-4106                        | caspase family protein [Fischerella sp. NIES-4106].                                | GCF_002368315.1 |
| WP_096682926.1 | APATPase+BetaPropeller→  <-Pentapeptide<-?  PSE→ PSE→  <-?  NACHT+TM+TM+TM→ FGS→ nSTAND1+TM+BetaPropeller*→ ABhydrolase→ | nSTAND1+TM+BetaPropeller              | 1278 | CA737_RS29000           | cyanobacteria      | Nostoc sp. NIES-2111                             | peptidase C14 [Nostoc sp. NIES-2111].                                              | GCF_002368215.1 |
| WP_096684184.1 | Pentapeptide→ NACHT→?→ NACHT+HEAT→  <-?  Pentapeptide→ nSTAND1+BetaPropeller*→ CASPASE→                                  | nSTAND1+BetaPropeller                 | 1280 | CDC41_RS02675           | cyanobacteria      | unclassified Calothrix                           | MULTISPECIES: WD40 repeat domain-containing protein [unclassified Calothrix].      | GCF_002368455.1 |
| WP_096722951.1 | <-ATPcone<-?<-?<-?<-?  ?→  <-REC  CASPASE+CASPASE+nSTAND1+BetaPropeller*→                                                | CASPASE+CASPASE+nSTAND1+BetaPropeller | 1589 | CDC35_RS17615           | cyanobacteria      | Chondrocystis sp. NIES-4102                      | caspase family protein [Chondrocystis sp. NIES-4102].                              | GCF_002368355.1 |
| WP_099198599.1 | <-SIG+ASH-IG<-?  ?→ nSTAND1+BetaPropeller*→  <-?<-?<-?  Cluster106_3clades→                                              | nSTAND1+BetaPropeller                 | 1284 | CYQ11_RS04175           | actinobacteria     | Streptomyces cinnamoneus                         | hypothetical protein [Streptomyces cinnamoneus].                                   | GCF_002727115.1 |
| WP_101833019.1 | nSTAND1+BetaPropeller*→                                                                                                  | nSTAND1+BetaPropeller                 | 1222 | bacteria>actinobacteria | Frankia canadensis | -                                                | 1325963764                                                                         | -               |
| WP_102179560.1 | EACC2+CASPASE+nSTAND1+BetaPropeller*→  <-ABhydrolase<-NUDIX                                                              | EACC2+CASPASE+nSTAND1+BetaPropeller   | 1565 | CEN45_RS19405           | cyanobacteria      | Fischerella thermalis                            | CHAT domain-containing protein [Fischerella thermalis].                            | GCF_002870635.1 |
| WP_102939115.1 | SIG+TM+TM+TM+TM+TM→ SIG+TM+TM+TM+TM+TM→ ABC-ATPase→  <-?  ?→?→ EACC2+CASPASE+nSTAND1+BetaPropeller*→                     | EACC2+CASPASE+nSTAND1+BetaPropeller   | 1603 | CEP15_RS15365           | cyanobacteria      | Cylindrospermopsis raciborskii                   | PQQ-binding-like beta-propeller repeat protein [Cylindrospermopsis raciborskii].   | GCF_002893125.1 |
| WP_103138901.1 | TM+TM+TM→?→?→  <-?<-?<-?  ?→ nSTAND1+BetaPropeller*→?→?→?→  <-Uma2                                                       | nSTAND1+BetaPropeller                 | 1225 | CLI64_RS20305           | cyanobacteria      | Nostoc sp. CENA543                               | hypothetical protein [Nostoc sp. CENA543].                                         | GCF_002896875.1 |
| WP_103964494.1 | SIG+nSTAND1+BetaPropeller*→?→?→  <-?  PSE→  <-?  ?→ PSE→  <-pPIWI+MID+RNaseH<-pPIWI+viral-AAA<-pPIWI                     | SIG+nSTAND1+BetaPropeller             | 1377 | C4V41_RS57390           | actinobacteria     | Nonomurea solani                                 | AAA family ATPase [Nonomurea solani].                                              | GCF_900108335.1 |
| WP_104899206.1 | EACC2+CASPASE+nSTAND1+BetaPropeller*→  <-XisI<-?  ?→?→ EACC2+CASPASE+nSTAND1+BetaPropeller→                              | EACC2+CASPASE+nSTAND1+BetaPropeller   | 1559 | NPM_RS08915             | cyanobacteria      | Nostoc sp. 'Peltigera membranacea cyanobiont' N6 | CHAT domain-containing protein [Nostoc sp. 'Peltigera membranacea cyanobiont' N6]. | GCF_002949735.1 |
| WP_106172461.1 | <-TPR  CASPASE+nSTAND1+BetaPropeller*→ Redoxin→                                                                          | CASPASE+nSTAND1+BetaPropeller         | 1796 | C7B76_RS10855           | cyanobacteria      | filamentous cyanobacterium CCP2                  | caspase family protein [filamentous cyanobacterium CCP2].                          | GCF_003003615.1 |

| acc            | operon                                                                                                          | architecture                          | len  | gen.name      | taxend              | species                                    | define                                                                                                         | gca             |
|----------------|-----------------------------------------------------------------------------------------------------------------|---------------------------------------|------|---------------|---------------------|--------------------------------------------|----------------------------------------------------------------------------------------------------------------|-----------------|
| WP_106238916.1 | Cluster59_2clades→ TPR→?→?→?→  <-?  nSTAND1+BetaPropeller*→?→?→?→  <-?  PSE→?→ ACT→?→ Cluster108_2clades→       | nSTAND1+BetaPropeller                 | 1232 | B0I32_RS14395 | actinobacteria      | Nonomuraea fuscirosea                      | WD40 repeat domain-containing protein [Nonomuraea fuscirosea].                                                 | GCF_003001935.1 |
| WP_106256509.1 | CASPASE+nSTAND1+BetaPropeller*→                                                                                 | CASPASE+nSTAND1+BetaPropeller         | 1771 | C7B82_RS11920 | cyanobacteria       | Leptolyngbya frigida                       | PD40 domain-containing protein [Leptolyngbya frigida].                                                         | GCF_003003795.1 |
| WP_106259571.1 | CASPASE+nSTAND1+TM*→?→?→?→  <-?  PSE→?→?→?→ Pentapeptide→                                                       | CASPASE+nSTAND1+TM                    | 985  | C7B82_RS25475 | cyanobacteria       | Leptolyngbya frigida                       | caspase family protein [Leptolyngbya frigida].                                                                 | GCF_003003795.1 |
| WP_106259865.1 | TIR+DrHyd→ nSTAND1+TM+BetaPropeller+TPR*→                                                                       | nSTAND1+TM+BetaPropeller+TPR          | 1061 | C7B82_RS26795 | cyanobacteria       | Leptolyngbya frigida                       | hypothetical protein [Leptolyngbya frigida].                                                                   | GCF_003003795.1 |
| WP_106288913.1 | <-FHA+Pkinase<-?<-?<-?  ?→?→?→?→  <-?  CASPASE+CASPASE+nSTAND1+BetaPropeller*→?→?→?→?→ Uma2→                    | CASPASE+CASPASE+nSTAND1+BetaPropeller | 1761 | C7B64_RS12100 | cyanobacteria       | Merismopedia glauca                        | caspase family protein [Merismopedia glauca].                                                                  | GCF_003003775.1 |
| WP_106409482.1 | HTH+nSTAND1+TM+BetaPropeller*→?→?→  <-?  ABhydrolase→                                                           | HTH+nSTAND1+TM+BetaPropeller          | 1356 | WH07_RS00620  | actinobacteria      | Streptomyces odonellii                     | helix-turn-helix domain-containing protein [Streptomyces odonellii].                                           | GCF_000981895.1 |
| WP_106859678.1 | <-AAA+TPR  ?→ nSTAND1+TM+BetaPropeller*→                                                                        | nSTAND1+TM+BetaPropeller              | 1282 | DAA54_RS06965 | acidobacteria       | Candidatus Sulfohalobium sp. SbA4          | WD40 repeat domain-containing protein [Candidatus Sulfohalobium sp. SbA4].                                     | GCF_900290305.1 |
| WP_106870381.1 | TIR+DrHyd→ nSTAND1+BetaPropeller*→  <-?  ABC-ATPase→                                                            | nSTAND1+BetaPropeller                 | 1551 | C7293_RS12420 | cyanobacteria       | unclassified Cyanobacteria (miscellaneous) | MULTISPECIES: pre-peptidase C-terminal domain-containing protein [unclassified Cyanobacteria (miscellaneous)]. | GCF_003017855.1 |
| WP_109279715.1 | <-nSTAND1+BetaPropeller  ?→?→?→ EACC1→ CASPASE+nSTAND1+TM+BetaPropeller*→                                       | CASPASE+nSTAND1+TM+BetaPropeller      | 1552 | CV755_RS09465 | actinobacteria      | Streptomyces orinoci                       | caspase family protein [Streptomyces orinoci].                                                                 | GCF_003121295.1 |
| WP_109364478.1 | SWACOS+TPR+TPR→?→?→ nSTAND1+BetaPropeller*→  <-?<-?  APATPase+TPR→                                              | nSTAND1+BetaPropeller                 | 1274 | DF268_RS38315 | actinobacteria      | Streptomyces sp. V2                        | hypothetical protein [Streptomyces sp. V2].                                                                    | GCF_003129505.1 |
| WP_111843756.1 | TIR→ nSTAND1+TM*→?→?→  <-?<-?<-SIGMA-HTH                                                                        | nSTAND1+TM                            | 949  | ESU54_RS03485 | bacteroidetes       | Aequorivita antarctica                     | hypothetical protein [Aequorivita antarctica].                                                                 | GCF_900489835.1 |
| WP_111882267.1 | TIR→ nSTAND1+TM*→                                                                                               | nSTAND1+TM                            | 744  | DSY54_RS14580 | bacteroidetes       | Aequorivita sp. CIP111184                  | hypothetical protein [Aequorivita sp. CIP111184].                                                              | GCF_900489465.1 |
| WP_112443263.1 | nSTAND1+BetaPropeller*→                                                                                         | nSTAND1+BetaPropeller                 | 1291 | DN051_RS43725 | actinobacteria      | Streptomyces sp. ZFG47                     | hypothetical protein [Streptomyces sp. ZFG47].                                                                 | GCF_003261055.1 |
| WP_114006120.1 | REC→?→?→?→?→ TIR+DrHyd→ nSTAND1+BetaPropeller*→?→?→  <-?<-?<-SIG+HISKIN+REC+AraC-HTH                            | nSTAND1+BetaPropeller                 | 1022 | DJ568_RS15045 | bacteroidetes       | Mucilaginibacter hurinus                   | hypothetical protein [Mucilaginibacter hurinus].                                                               | GCF_003324525.1 |
| WP_114324839.1 | TIR+DrHyd→ nSTAND1*→                                                                                            | nSTAND1                               | 259  | DWA31_RS01095 | gammaproteobacteria | Candidatus Colwellia aromaticivorans       | hypothetical protein [Candidatus Colwellia aromaticivorans].                                                   | GCF_003333305.1 |
| WP_116215210.1 | HTH+nSTAND1+TM+BetaPropeller*→  <-?<-?<-?  ?→?→?→  <-?  ABhydrolase→                                            | HTH+nSTAND1+TM+BetaPropeller          | 1291 | DXZ73_RS36490 | actinobacteria      | Streptomyces olivoreticuli                 | helix-turn-helix domain-containing protein [Streptomyces olivoreticuli].                                       | GCF_003391135.1 |
| WP_117303390.1 | Redoxin→?→?→?→  <-?  ?→ TIR+DrHyd→ nSTAND1+TM+TPR*→  <-SIG+TPR                                                  | nSTAND1+TM+TPR                        | 1216 | D0Y96_RS19515 | acidobacteria       | Acidipila sp. 4G-K13                       | hypothetical protein [Acidipila sp. 4G-K13].                                                                   | GCF_003428625.1 |
| WP_120036984.1 | p450→ NUDIX→  <-?<-PSE  ?→  <-?  EACC1→ CASPASE+nSTAND1+TM+BetaPropeller*→  <-tRNA  ?→  <-?  ?→  <-SIG+PDZ+LonC | CASPASE+nSTAND1+TM+BetaPropeller      | 1417 | D5S18_RS01040 | actinobacteria      | Nocardia panacis                           | caspase family protein [Nocardia panacis].                                                                     | GCF_003598715.1 |
| WP_121179107.1 | EACC1→ CASPASE+nSTAND1+TM+BetaPropeller*→                                                                       | CASPASE+nSTAND1+TM+BetaPropeller      | 1551 | BX285_RS31390 | actinobacteria      | Streptomyces sp. 1114.5                    | hypothetical protein [Streptomyces sp. 1114.5].                                                                | GCF_003635085.1 |





| acc            | operon                                                                                                                | architecture                     | len  | gen.name                     | taxend                      | species                                | define                                                                               | gca             |
|----------------|-----------------------------------------------------------------------------------------------------------------------|----------------------------------|------|------------------------------|-----------------------------|----------------------------------------|--------------------------------------------------------------------------------------|-----------------|
| WP_149303455.1 | <-VWA<-MoxR-AAA  TIR→ nSTAND1+TM*→?→?→?→  <-?  ?→  <-NUDIX                                                            | nSTAND1+TM                       | 774  | F2B13_RS05070                | bacteroidetes               | Flavobacteriaceae<br>bacterium S2-4-21 | hypothetical protein<br>[Flavobacteriaceae<br>bacterium S2-4-21].                    | GCF_008367235.1 |
| WP_149853426.1 | nSTAND1+BetaPropeller*→ nSTAND1+BetaPropeller→  <-MED15<-?<-?  ?→ BetaPropeller+ABhydrolase→                          | nSTAND1+BetaPropeller            | 1270 | F0L68_RS31105                | actinobacteria              | Goodfellowiella sp.<br>AN110305        | hypothetical protein<br>[Goodfellowiella sp.<br>AN110305].                           | GCF_008386585.1 |
| WP_149854623.1 | nSTAND1*→                                                                                                             | nSTAND1                          | 264  | F0L68_RS37265                | actinobacteria              | Goodfellowiella sp.<br>AN110305        | ATP-binding protein,<br>partial [Goodfellowiella sp.<br>AN110305].                   | GCF_008386585.1 |
| WP_150477790.1 | nSTAND1+TM+BetaPropeller*→                                                                                            | nSTAND1+TM+BetaPropeller         | 1249 | CP975_RS04485                | actinobacteria              | Streptomyces alboniger                 | hypothetical protein<br>[Streptomyces alboniger].                                    | GCF_008704395.1 |
| WP_151694506.1 | SIG+Pentapeptide→ REC→?→?→ nSTAND1+TM+BetaPropeller*→                                                                 | nSTAND1+TM+BetaPropeller         | 1253 | MiAbW_RS00775                | cyanobacteria               | Microcystis aeruginosa                 | WD40 repeat<br>domain-containing protein<br>[Microcystis aeruginosa].                | GCF_008974145.1 |
| WP_151729819.1 | wHTH-4stranded+TPRs+SWACOS+TPR+TPR→?→?→?→ HOP2→?→?→  <-?  Pkinase+TIR+nSTAND1+FilH*→?→?→  <-?<-ABC-ATPase<-ABC-ATPase | Pkinase+TIR+nSTAND1+FilH         | 1507 | KTAU_RS18765                 | chloroflexi                 | Thermogemmatospira<br>aurantia         | protein kinase<br>[Thermogemmatospira<br>aurantia].                                  | GCF_008974285.1 |
| WP_151998675.1 | TM+TM+TM+TM+TM+TM+TM+TM+TM+TM+TM+cNMP→ TIR+DrHyd→ nSTAND1+TM+LPD8+BetaPropeller*→                                     | nSTAND1+TM+LPD8+BetaPropeller    | 1056 | GC130_RS12600                | bacteroidetes               | Imperialibacter sp.<br>EC-SDR9         | High-affinity carbon uptake<br>protein Hat/HatR<br>[Imperialibacter sp.<br>EC-SDR9]. | GCF_902498805.1 |
| WP_152590945.1 | CASPASE+nSTAND1+BetaPropeller→?→?→?→ CASPASE+ABhydrolase→ ABhydrolase→ CASPASE+nSTAND1+BetaPropeller→                 | CASPASE+nSTAND1+TM+BetaPropeller | 1471 | GXM_RS28955                  | cyanobacteria               | Nostoc sphaeroides                     | caspase family protein<br>[Nostoc sphaeroides].                                      | GCF_009372195.1 |
| WP_152780064.1 | CASPASE+nSTAND1+TM+BetaPropeller*→<br>HTH+nSTAND1+TM+BetaPropeller*→                                                  | HTH+nSTAND1+TM+BetaPropeller     | 1251 | FNH04_RS03190                | actinobacteria              | Streptomyces phyllanthi                | hypothetical protein<br>[Streptomyces phyllanthi].                                   | GCF_009377205.1 |
| WP_153167482.1 | <-Cluster428_2clades<-?<-?  TIR→ SIG+nSTAND1+BetaPropeller*→                                                          | SIG+nSTAND1+BetaPropeller        | 1296 | GH664_RS07725                | betaproteobacteria          | Thauera sp. 2A1                        | hypothetical protein<br>[Thauera sp. 2A1].                                           | GCF_009469595.1 |
| WP_153167675.1 | <-REC<-?  ?→  <-PSE  ?→ TIR+DrHyd→ nSTAND1+BetaPropeller*→?→?→ HOP2→                                                  | nSTAND1+BetaPropeller            | 1225 | GH664_RS08515                | betaproteobacteria          | Thauera sp. 2A1                        | AAA family ATPase<br>[Thauera sp. 2A1].                                              | GCF_009469595.1 |
| WP_155176087.1 | TM+TM+TM+TM+TM+TM+TM+TM+TM+TM+TM+TM+cNMP→ TIR+DrHyd→ nSTAND1+TM+BetaPropeller*→                                       | nSTAND1+TM+BetaPropeller         | 1054 | E1163_RS26420                | bacteroidetes               | Fulvivirga kasyanovii                  | High-affinity carbon uptake<br>protein Hat/HatR<br>[Fulvivirga kasyanovii].          | GCF_009711405.1 |
| WP_155342137.1 | nSTAND1+BetaPropeller*→                                                                                               | nSTAND1+BetaPropeller            | 1430 | Acor_RS40905                 | actinobacteria              | Acrocarpospora corrugata               | AAA family ATPase<br>[Acrocarpospora<br>corrugata].                                  | GCF_009687845.1 |
| WP_155349768.1 | HTH+nSTAND1+TM+BetaPropeller*→                                                                                        | HTH+nSTAND1+TM+BetaPropeller     | 1306 | Aple_RS38900                 | actinobacteria              | Acrocarpospora<br>pleiomorpha          | helix-turn-helix<br>domain-containing protein<br>[Acrocarpospora<br>pleiomorpha].    | GCF_009687885.1 |
| WP_155356770.1 | <-SIG+TM+TM+TM+TM+TM+TM<-?  ABhydrolase→?→?→?→?→ nSTAND1+BetaPropeller*→                                              | nSTAND1+BetaPropeller            | 1404 | Amac_RS24660                 | actinobacteria              | Acrocarpospora<br>macrocephala         | hypothetical protein<br>[Acrocarpospora<br>macrocephala].                            | GCF_009687865.1 |
| WP_155743298.1 | CASPASE+ABhydrolase→ CASPASE+nSTAND1+BetaPropeller→ CASPASE+nSTAND1+TM+BetaPropeller*→                                | CASPASE+nSTAND1+TM+BetaPropeller | 1444 | F7734_RS02865                | cyanobacteria               | Scytonema sp. UIC 10036                | caspase family protein<br>[Scytonema sp. UIC<br>10036].                              | GCF_009725235.1 |
| WP_155744071.1 | CASPASE+nSTAND1+TM+BetaPropeller*→                                                                                    | CASPASE+nSTAND1+TM+BetaPropeller | 1426 | F7734_RS07420                | cyanobacteria               | Scytonema sp. UIC 10036                | CHAT domain-containing<br>protein [Scytonema sp.<br>UIC 10036].                      | GCF_009725235.1 |
| WP_157357215.1 | nSTAND1+BetaPropeller*→                                                                                               | nSTAND1+BetaPropeller            | 1257 | bacteria>actinobacte-<br>ria | Amicolatopsis<br>nigrescens | -                                      | 1786243365                                                                           | -               |



| acc            | operon                                                                                 | architecture                     | len  | gen.name      | taxend              | species                          | define                                                                        | gca             |
|----------------|----------------------------------------------------------------------------------------|----------------------------------|------|---------------|---------------------|----------------------------------|-------------------------------------------------------------------------------|-----------------|
| WP_165741954.1 | TIR+nSTAND1+BetaPropeller*→                                                            | TIR+nSTAND1+BetaPropeller        | 1776 | HBF22_RS11055 | gammaproteobacteria | Candidatus Thiosymbion oneisti   | hypothetical protein, partial [Candidatus Thiosymbion oneisti].               | GCF_011392785.1 |
| WP_165977045.1 | <-APATPase  nSTAND1+BetaPropeller*→?→ NACHT+TM+TM+TM+TM+TM+TM+TM+TM→  <-?<-?<-?  REC→  | nSTAND1+BetaPropeller            | 1163 | E1294_RS02715 | actinobacteria      | Nonomurea sp. KC712              | AAA family ATPase [Nonomurea sp. KC712].                                      | GCF_004349015.1 |
| WP_166362185.1 | TM+TM+TM+TM+TM+TM+TM+TM+TM+TM+TM+cNMP→?→ TIR+DrHyd→ nSTAND1+TM+RapA-C+BetaPropeller*→  | nSTAND1+TM+RapA-C+BetaPropeller  | 1020 | G8O23_RS04390 | bacteroidetes       | Bacteroidales bacterium M08MB    | High-affinity carbon uptake protein Hat/HatR [Bacteroidales bacterium M08MB]. | GCF_011174675.1 |
| WP_167485984.1 | nSTAND1+BetaPropeller*→  <-?  ?→  <-?<-PSE  ?→ PSE→?→  <-?<-ICLR-HTH                   | nSTAND1+BetaPropeller            | 1286 | F6W96_RS10530 | actinobacteria      | Nocardia terpenica               | hypothetical protein [Nocardia terpenica].                                    | GCF_011801165.1 |
| WP_168094374.1 | HTH+nSTAND1+TM+BetaPropeller*→                                                         | HTH+nSTAND1+TM+BetaPropeller     | 1232 | HCK01_RS21035 | actinobacteria      | Streptomyces sp. AA8             | helix-turn-helix domain-containing protein [Streptomyces sp. AA8].            | GCF_012034305.1 |
| WP_169156509.1 | CASPASE+nSTAND1+TM+BetaPropeller*→                                                     | CASPASE+nSTAND1+TM+BetaPropeller | 1399 | DP116_RS18170 | cyanobacteria       | Brasilonema bromeliae            | CHAT domain-containing protein [Brasilonema bromeliae].                       | GCF_012912135.1 |
| WP_169616265.1 | <-TPR+nSTAND1+BetaPropeller<-?  ?→ nSTAND1+BetaPropeller→  <-?  nSTAND1+BetaPropeller→ | nSTAND1+BetaPropeller            | 1227 | E1H13_RS20825 | cyanobacteria       | Nodosilinea sp. P-1105           | AAA family ATPase [Nodosilinea sp. P-1105].                                   | GCF_012911975.1 |
| WP_169616268.1 | nSTAND1+BetaPropeller*→                                                                | nSTAND1+BetaPropeller            | 1430 | E1H13_RS20835 | cyanobacteria       | Nodosilinea sp. P-1105           | AAA family ATPase [Nodosilinea sp. P-1105].                                   | GCF_012911975.1 |
| WP_169682334.1 | TM+TM+TM+TM+TM+TM+TM+TM+TM+TM+TM+cNMP→ TIR+DrHyd→ nSTAND1+BetaPropeller*→              | nSTAND1+BetaPropeller            | 1042 | HH304_RS13030 | bacteroidetes       | Flammeovirgaceae bacterium KN852 | hypothetical protein [Flammeovirgaceae bacterium KN852].                      | GCF_012926615.1 |
