# Supplementary material for: Bacterial death and TRADD-N domains help define novel apoptosis and immunity mechanisms shared by prokaryotes and metazoans
Source: PubMed Central journal article supplement (PMC8195603; doi:10.7554/elife.70394), 2021-06-01
Supplement: elife-70394-fig3-data1.pdf [file elife-70394-fig3-data1.pdf]

**Bacterial Death and TRADD-N domains help define novel apoptosis and immunity mechanisms shared by prokaryotes and metazoans**

**Figure 3-Source data 1**

Gurmeet Kaur†, Lakshminarayan M. Iyer†, A. Maxwell Burroughs, L. Aravind\*

Computational Biology Branch, National Center for Biotechnology Information, National Library of Medicine, National Institutes of Health, Bethesda, MD 20894, USA

†These authors contributed equally to the manuscript

## **Index.**

1. Gene neighborhoods and domain architectures of the bacterial TRADD-N domains

Gene neighborhoods and domain architectures of the bacterial TRADD-N domains

| acc        | operon                                                                                                 | architecture                           | len  | gen.name       | taxend              | species                            | define                                                                                | gca             |
|------------|--------------------------------------------------------------------------------------------------------|----------------------------------------|------|----------------|---------------------|------------------------------------|---------------------------------------------------------------------------------------|-----------------|
| AKV69521.1 | ECF-HTH+TRADD-N+Pentapeptide*→  <-?<-?  ECF-HTH+TRADD-N+Pentapeptide→                                  | ECF-HTH+TRADD-N+Pentapeptide           | 463  | VL20_4620      | cyanobacteria       | Microcystis panniformis FACHB-1757 | Pentapeptide repeat family protein [Microcystis panniformis FACHB-1757]               | GCA_001264245.1 |
| AKV69524.1 | ECF-HTH+TRADD-N+Pentapeptide→  <-?<-?  ECF-HTH+TRADD-N+Pentapeptide*→                                  | ECF-HTH+TRADD-N+Pentapeptide           | 430  | VL20_4623      | cyanobacteria       | Microcystis panniformis FACHB-1757 | Pentapeptide repeat family protein [Microcystis panniformis FACHB-1757]               | GCA_001264245.1 |
| AOW98657.1 | TRADD-N+Pentapeptide→ TRADD-N-aHTH1+TRADD-N+Pentapeptide→?→  <-?  TRADD-N-aHTH1+TRADD-N+Pentapeptide*→ | TRADD-N-aHTH1+TRADD-N+Pentapeptide     | 359  | BJP34_03640    | cyanobacteria       | Moorea producens PAL-8-15-08-1     | hypothetical protein BJP34_03640 [Moorea producens PAL-8-15-08-1]                     | GCA_001767235.1 |
| AOX04112.1 | TRADD-N+Pentapeptide*→ TRADD-N-aHTH1+TRADD-N+Pentapeptide→?→  <-?  TRADD-N-aHTH1+TRADD-N+Pentapeptide→ | TRADD-N+Pentapeptide                   | 345  | BJP34_03620    | cyanobacteria       | Moorea producens PAL-8-15-08-1     | hypothetical protein BJP34_03620 [Moorea producens PAL-8-15-08-1]                     | GCA_001767235.1 |
| AOX04113.1 | TRADD-N+Pentapeptide→ TRADD-N-aHTH1+TRADD-N+Pentapeptide*→?→  <-?  TRADD-N-aHTH1+TRADD-N+Pentapeptide→ | TRADD-N-aHTH1+TRADD-N+Pentapeptide     | 462  | BJP34_03625    | cyanobacteria       | Moorea producens PAL-8-15-08-1     | hypothetical protein BJP34_03625 [Moorea producens PAL-8-15-08-1]                     | GCA_001767235.1 |
| AOY81242.1 | TRADD-N*→ TRADD-N+Pentapeptide→                                                                        | TRADD-N                                | 93   | BJP36_16370    | cyanobacteria       | Moorea producens JHB               | hypothetical protein BJP36_16370 [Moorea producens JHB]                               | GCA_001854205.1 |
| AOY84499.1 | TRADD-N-aHTH1+TRADD-N+Pentapeptide*→                                                                   | TRADD-N-aHTH1+TRADD-N+Pentapeptide     | 351  | BJP36_03795    | cyanobacteria       | Moorea producens JHB               | hypothetical protein BJP36_03795 [Moorea producens JHB]                               | GCA_001854205.1 |
| ASQ04924.1 | NTase+helical-region+TRADD-N+X*→                                                                       | NTase+helical-region+TRADD-N+X         | 553  | CDO23_13830    | alphaproteobacteria | Sinorhizobium meliloti             | hypothetical protein CDO23_13830 [Sinorhizobium meliloti]                             | GCA_002197105.1 |
| ASY58478.1 | HNH+TRADD-N+STAND+TPRs*→                                                                               | HNH+TRADD-N+STAND+TPRs                 | 1591 | SS05631_c35640 | alphaproteobacteria | Sinorhizobium sp. CCBAU 05631      | hypothetical protein SS05631_c35640 [Sinorhizobium sp. CCBAU 05631]                   | GCA_002288505.1 |
| AUB41700.1 | TRADD-N-aHTH1+TRADD-N+Pentapeptide*→                                                                   | TRADD-N-aHTH1+TRADD-N+Pentapeptide     | 478  | COO91_07762    | cyanobacteria       | Nostoc flagelliforme CCNUN1        | putative protein YjbI, containings pentapeptide repeats [Nostoc flagelliforme CCNUN1] | GCA_002813575.1 |
| BAU04807.1 | ??→ TRADD-N+TPRs*→ EACC2+CASPASE+CHASE2+TM+TM→ TM+beta_rich+TPRs→ TPRs+CASPASE→                        | TRADD-N+TPRs                           | 201  | FIS3754_06960  | cyanobacteria       | Fischerella sp. NIES-3754          | hypothetical protein FIS3754_06960 [Fischerella sp. NIES-3754]                        | GCA_001548455.1 |
| BAY32115.1 | CASPASE+TRADD-N+??*→ Uma2_REase→                                                                       | CASPASE+TRADD-N+??                     | 303  | NIES2107_40010 | cyanobacteria       | Nostoc carneum NIES-2107           | hypothetical protein NIES2107_40010 [Nostoc carneum NIES-2107]                        | GCA_002368155.1 |
| BAZ00462.1 | MetJarc-HTH/ParD_antitoxin→ CASPASE+TRADD-N+PAS+HTH*→                                                  | CASPASE+TRADD-N+PAS+HTH                | 517  | NIES37_44540   | cyanobacteria       | Tolypothrix tenuis PCC 7101        | hypothetical protein NIES37_44540 [Tolypothrix tenuis PCC 7101]                       | GCA_002368295.1 |
| BAZ15419.1 | CASPASE+TRADD-N+helical-region+HTH+HTH*→                                                               | CASPASE+TRADD-N+helical-region+HTH+HTH | 704  | NIES4071_72910 | cyanobacteria       | Calothrix sp. NIES-4071            | hypothetical protein NIES4071_72910 [Calothrix sp. NIES-4071]                         | GCA_002368455.1 |

| acc          | operon                                                                     | architecture                                | len  | gen.name         | taxend              | species                                 | define                                                                   | gca             |
|--------------|----------------------------------------------------------------------------|---------------------------------------------|------|------------------|---------------------|-----------------------------------------|--------------------------------------------------------------------------|-----------------|
| BBC23917.1   | CASPASE+TRADD-N+vWA*→                                                      | CASPASE+TRADD-N+vWA                         | 495  | ABRG53_1660      | cyanobacteria       | Pseudanabaena sp. ABRG5-3               | von Willebrand factor type A [Pseudanabaena sp. ABRG5-3]                 | GCA_003967015.1 |
| BBC25632.1   | TRADD-N-aHTH1+TRADD-N+Pentapeptide*→                                       | TRADD-N-aHTH1+TRADD-N+Pentapeptide          | 429  | ABRG53_3375      | cyanobacteria       | Pseudanabaena sp. ABRG5-3               | pentapeptide repeat protein [Pseudanabaena sp. ABRG5-3]                  | GCA_003967015.1 |
| CCI08969.1   | TRADD-N+Pentapeptide*→                                                     | TRADD-N+Pentapeptide                        | 249  | MICAD_3610002    | cyanobacteria       | Microcystis aeruginosa PCC 7941         | Genome sequencing data, contig C319 [Microcystis aeruginosa PCC 7941]    | GCA_000312205.1 |
| EDX70590.1   | TRADD-N-aHTH1+TRADD-N+Pentapeptide*→ adh_short→                            | TRADD-N-aHTH1+TRADD-N+Pentapeptide          | 436  | MC7420_162       | cyanobacteria       | Coleofasciculus chthonoplastes PCC 7420 | Pentapeptide repeat protein [Coleofasciculus chthonoplastes PCC 7420]    | GCA_000155555.1 |
| EIN00431.1   | NTase+helical-region+TRADD-N+X*→                                           | NTase+helical-region+TRADD-N+X              | 526  | WQE_15411        | betaproteobacteria  | Paraburkholderia hospita                | hypothetical protein WQE_15411 [Paraburkholderia hospita]                | GCA_000265115.1 |
| ELP52905.1   | ECF-HTH+TRADD-N+Pentapeptide*→                                             | ECF-HTH+TRADD-N+Pentapeptide                | 433  | O53_4634         | cyanobacteria       | Microcystis aeruginosa TAIHU98          | pentapeptide repeats family protein [Microcystis aeruginosa TAIHU98]     | GCA_000330925.1 |
| ELS45411.1   | ECF-HTH+TRADD-N+Pentapeptide*→ SIG→  <-?<-XisI                             | ECF-HTH+TRADD-N+Pentapeptide                | 403  | C789_4786        | cyanobacteria       | Microcystis aeruginosa DIANCHI905       | pentapeptide repeats family protein [Microcystis aeruginosa DIANCHI905]  | GCA_000332585.1 |
| ETD83219.1   | NTase+helical-region+TRADD-N+X*→                                           | NTase+helical-region+TRADD-N+X              | 511  | U703_10115       | alphaproteobacteria | Rhodobacter capsulatus YW1              | hypothetical protein U703_10115 [Rhodobacter capsulatus YW1]             | GCA_000506525.2 |
| GAL95421.1   | ECF-HTH+TRADD-N+Pentapeptide*→                                             | ECF-HTH+TRADD-N+Pentapeptide                | 433  | N44_04276        | cyanobacteria       | Microcystis aeruginosa NIES-44          | hypothetical protein N44_04276 [Microcystis aeruginosa NIES-44]          | GCA_000787675.1 |
| GBE74065.1   | ECF-HTH+TRADD-N+Pentapeptide*→                                             | ECF-HTH+TRADD-N+Pentapeptide                | 390  | myaer87_12920    | cyanobacteria       | Microcystis aeruginosa NIES-87          | hypothetical protein myaer87_12920 [Microcystis aeruginosa NIES-87]      | GCA_002933835.1 |
| HCB01408.1   | TIR+TRADD-N+TM+TM*→                                                        | TIR+TRADD-N+TM+TM                           | 516  | DEP19_03405      | Chloroflexi         | Anaerolineae bacterium                  | TPA: hypothetical protein DEP19_03405 [Anaerolineae bacterium].          | GCA_003519565.1 |
| HCK67110.1   | TRADD-N*→                                                                  | TRADD-N                                     | 203  | DHW49_12675      | Chloroflexi         | Anaerolineae bacterium                  | TPA: hypothetical protein DHW49_12675, partial [Anaerolineae bacterium]. | GCA_003526495.1 |
| HCR71678.1   | TIR+TRADD-N+TM+TM*→                                                        | TIR+TRADD-N+TM+TM                           | 508  | DIW23_09555      | Chloroflexi         | Anaerolineae bacterium                  | TPA: hypothetical protein DIW23_09555 [Anaerolineae bacterium].          | GCA_003524705.1 |
| HFK75788.1   | TRADD-N+HTH+TM*→                                                           | TRADD-N+HTH+TM                              | 519  | ENR96_10195      | Chloroflexi         | Anaerolineae bacterium                  | TPA: hypothetical protein ENR96_10195, partial [Anaerolineae bacterium]. | GCA_011329465.1 |
| HFK76016.1   | HTH+TRADD-N+Pentapeptide+Pentapeptide+TM+TM*→                              | HTH+TRADD-N+Pentapeptide+Pentapeptide+TM+TM | 428  | ENR96_11345      | Chloroflexi         | Anaerolineae bacterium                  | TPA: pentapeptide repeat-containing protein [Anaerolineae bacterium].    | GCA_011329465.1 |
| KAA3644872.1 | Coiled-coil+TRADD-N+APATPase+TPR+TPR*→?→?→ PCRf+RF-1→                      | Coiled-coil+TRADD-N+APATPase+TPR+TPR        | 1021 | DWQ07_15840      | Chloroflexi         | Chloroflexi bacterium                   | tetratricopeptide repeat protein [Chloroflexi bacterium].                | GCA_008501685.1 |
| KDR56649.1   | EAD4+TRADD-N+STAND*→                                                       | EAD4+TRADD-N+STAND                          | 541  | AP-PUASWS_015575 | cyanobacteria       | Arthrospira platensis str. Paraca       | hypothetical protein APPUASWS_015575 [Arthrospira platensis str. Paraca] | GCA_000175415.3 |
| KEZ00677.1   | ZNR+HTH+HTH+TIR→ PNPase+TRADD-N+STAND+wHTH+TPRs*→??+HEPN→??+SIR2+??+STAND→ | PNPase+TRADD-N+STAND+wHTH+TPRs              | 1719 | AI27_03035       | alphaproteobacteria | Sphingomonas sp. BHC-A                  | hypothetical protein AI27_03035 [Sphingomonas sp. BHC-A]                 | GCA_000576455.2 |

| acc          | operon                                                                                                                | architecture                       | len  | gen.name    | taxend             | species                           | define                                                                                  | gca             |
|--------------|-----------------------------------------------------------------------------------------------------------------------|------------------------------------|------|-------------|--------------------|-----------------------------------|-----------------------------------------------------------------------------------------|-----------------|
| KIF37416.1   | TRADD-N-aHTH1+TRADD-N+Pentapeptide*→                                                                                  | TRADD-N-aHTH1+TRADD-N+Pentapeptide | 436  | PI95_05020  | cyanobacteria      | Hassallia byssoidea VB512170      | hypothetical protein PI95_05020 [Hassallia byssoidea VB512170]                          | -               |
| KPK03089.1   | EAD7→?→   <-?  ?→ EAD7+TRADD-N+TM*→                                                                                   | EAD7+TRADD-N+TM                    | 234  | AMJ56_20055 | Chloroflexi        | Anaerolineae bacterium SG8_19     | hypothetical protein AMJ56_20055, partial [Anaerolineae bacterium SG8_19].              | GCA_001303105.1 |
| KST65300.1   | EAD1+TRADD-N+Pentapeptide*→                                                                                           | EAD1+TRADD-N+Pentapeptide          | 705  | BC008_21105 | cyanobacteria      | Mastigocoleus testarum BC008      | hypothetical protein BC008_21105 [Mastigocoleus testarum BC008]                         | GCA_001456025.1 |
| KST65646.1   | EAD1+TRADD-N+Pentapeptide*→                                                                                           | EAD1+TRADD-N+Pentapeptide          | 744  | BC008_21980 | cyanobacteria      | Mastigocoleus testarum BC008      | hypothetical protein BC008_21980 [Mastigocoleus testarum BC008]                         | GCA_001456025.1 |
| KVE14567.1   | PNPase+TRADD-N+STAND+wHTH+TPRs*→                                                                                      | PNPase+TRADD-N+STAND+wHTH+TPRs     | 1631 | WS66_12190  | betaproteobacteria | Burkholderia sp. LA-2-3-30-S1-D2  | hypothetical protein WS66_12190 [Burkholderia sp. LA-2-3-30-S1-D2]                      | GCA_001523915.1 |
| MBC8162005.1 | <-Cluster22_2clades  TIR+TRADD-N+TPR*→ TPR-repeats+CASPASE+TM→?→ TPR-repeats→                                         | TIR+TRADD-N+TPR                    | 643  | H7Z42_12380 | Chloroflexi        | Roseiflexaceae bacterium          | toll/interleukin-1 receptor domain-containing protein [Roseiflexaceae bacterium].       | GCA_014381165.1 |
| MBC8265192.1 | TM+APATPase+TPR+TPR→ REase+TRADD-N+Zf-TRC1+GNAT*→                                                                     | REase+TRADD-N+Zf-TRC1+GNAT         | 524  | H8E47_13840 | Chloroflexi        | Anaerolineales bacterium          | zinc-ribbon domain containing protein [Anaerolineales bacterium].                       | GCA_014382145.1 |
| MBD2211899.1 | HTH+TRADD-N+Pentapeptide*→ SIG+NACHT→   <-?  ?→   <-?  ?→   <-TRADDN+Pentapeptide+TM+TM+TM+TM+TM+Pentapeptide-repeats | HTH+TRADD-N+Pentapeptide           | 542  | H6G27_18785 | Cyanobacteria      | Nostoc linckia FACHB-104          | pentapeptide repeat-containing protein [Nostoc linckia FACHB-104].                      | GCA_014696615.1 |
| MBE0669634.1 | TIR+TRADD-N+TM+TM*→                                                                                                   | TIR+TRADD-N+TM+TM                  | 524  | IH588_03520 | Chloroflexi        | Anaerolineales bacterium          | TIR domain-containing protein [Anaerolineales bacterium].                               | GCA_014860805.1 |
| MBE7472266.1 | APATPase→ TPR-repeats→   <-?  HTH+TRADD-N+TM+IG+GBD-PPC*→                                                             | HTH+TRADD-N+TM+IG+GBD-PPC          | 1056 | HS114_24290 | Chloroflexi        | Anaerolineales bacterium          | Ig-like domain-containing protein [Anaerolineales bacterium].                           | GCA_015075405.1 |
| MBE7530003.1 | <-TPR-repeats<-?  ?→?→ STAND+TRADD-N+EAD7*→                                                                           | STAND+TRADD-N+EAD7                 | 514  | HS099_09760 | Chloroflexi        | Ardenticatenaceae bacterium       | hypothetical protein HS099_09760 [Ardenticatenaceae bacterium].                         | GCA_015075765.1 |
| MBE7552287.1 | TPR-repeats→   <-?  ?→ EAD7+TRADD-N+TPR+TM*→                                                                          | EAD7+TRADD-N+TPR+TM                | 649  | HS126_14560 | Chloroflexi        | Anaerolineales bacterium          | hypothetical protein HS126_14560 [Anaerolineales bacterium].                            | GCA_015075185.1 |
| MBI1926498.1 | HNH+TRADD-N+Dehydrogenase-Rossmann*→                                                                                  | HNH+TRADD-N+Dehydrogenase-Rossmann | 411  | HYR99_19920 | Bacteria           | Candidatus Poribacteria bacterium | nucleotide sugar dehydrogenase, partial [Candidatus Poribacteria bacterium].            | GCA_016178185.1 |
| MBI5950754.1 | TIR+TRADD-N+NACHT*→                                                                                                   | TIR+TRADD-N+NACHT                  | 624  | HY865_03780 | Chloroflexi        | Chloroflexi bacterium             | toll/interleukin-1 receptor domain-containing protein, partial [Chloroflexi bacterium]. | GCA_016234555.1 |
| NEO19477.1   | <-Pkinase+GUN4+TM<-?  ?→ Pentapeptide-repeats→?→   <-?<-?  HTH+TRADD-N+Pentapeptide*→                                 | HTH+TRADD-N+Pentapeptide           | 409  | F6K57_08850 | Cyanobacteria      | Moorea sp. SIO4A5                 | pentapeptide repeat-containing protein [Moorea sp. SIO4A5].                             | GCA_010672005.1 |
| NEO36452.1   | HTH+TRADDN+Pentapeptide-repeats→?→   <-?  ?→   <-?  HTH+TRADD-N+Pentapeptide*→                                        | HTH+TRADD-N+Pentapeptide           | 493  | F6J90_09010 | Cyanobacteria      | Moorea sp. SIOASIH                | pentapeptide repeat-containing protein [Moorea sp. SIOASIH].                            | GCA_010671925.1 |
| NEO62923.1   | HTH+TRADD-N+Pentapeptide*→                                                                                            | HTH+TRADD-N+Pentapeptide           | 424  | F6J98_21785 | Cyanobacteria      | Moorea sp. SIO4G2                 | pentapeptide repeat-containing protein [Moorea sp. SIO4G2].                             | GCA_010692345.1 |
| NEO66288.1   | HTH+TRADD-N+Pentapeptide*→                                                                                            | HTH+TRADD-N+Pentapeptide           | 375  | F6J98_40265 | Cyanobacteria      | Moorea sp. SIO4G2                 | pentapeptide repeat-containing protein [Moorea sp. SIO4G2].                             | GCA_010692345.1 |

| acc        | operon                                                           | architecture                       | len  | gen.name    | taxend              | species                               | define                                                                                        | gca             |
|------------|------------------------------------------------------------------|------------------------------------|------|-------------|---------------------|---------------------------------------|-----------------------------------------------------------------------------------------------|-----------------|
| NEO94808.1 | Trypsin+TRADD-N+EAD7+TM+TM+TM*→                                  | Trypsin+TRADD-N+EAD7+TM+TM+TM      | 672  | F6K56_33295 | Cyanobacteria       | Moorea sp. SIO3G5                     | trypsin-like peptidase domain-containing protein [Moorea sp. SIO3G5].                         | GCA_010692495.1 |
| NEP53221.1 | HTH+TRADD-N+Pentapeptide*→                                       | HTH+TRADD-N+Pentapeptide           | 622  | F6K65_32240 | Cyanobacteria       | Moorea sp. SIO3C2                     | pentapeptide repeat-containing protein [Moorea sp. SIO3C2].                                   | GCA_010692465.1 |
| NEQ53750.1 | CASPASE+TRADD-N*→                                                | CASPASE+TRADD-N                    | 293  | F6K11_27065 | Cyanobacteria       | Leptolyngbya sp. SIO3F4               | CHAT domain-containing protein, partial [Leptolyngbya sp. SIO3F4].                            | GCA_010672145.1 |
| NEQ58411.1 | <-Pkinase+GUN4+TM<-?  ?→?→    <-?  HTH+TRADD-N+Pentapeptide*→    | HTH+TRADD-N+Pentapeptide           | 385  | F6K53_13800 | Cyanobacteria       | Moorea sp. SIO4A1                     | pentapeptide repeat-containing protein [Moorea sp. SIO4A1].                                   | GCA_010672065.1 |
| NEQ87655.1 | HTH+TRADD-N+Pentapeptide*→                                       | HTH+TRADD-N+Pentapeptide           | 376  | F6K26_49000 | Cyanobacteria       | Moorea sp. SIO2I5                     | pentapeptide repeat-containing protein [Moorea sp. SIO2I5].                                   | GCA_010672285.1 |
| NEQ87826.1 | HTH+TRADD-N*→                                                    | HTH+TRADD-N                        | 243  | F6K26_49970 | Cyanobacteria       | Moorea sp. SIO2I5                     | pentapeptide repeat-containing protein, partial [Moorea sp. SIO2I5].                          | GCA_010672285.1 |
| NES20938.1 | HTH+TRADD-N+Pentapeptide*→                                       | HTH+TRADD-N+Pentapeptide           | 574  | F6K41_18895 | Cyanobacteria       | Caldora sp. SIO3E6                    | pentapeptide repeat-containing protein [Caldora sp. SIO3E6].                                  | GCA_010672185.1 |
| NJM06280.1 | <-Cluster22_2clades  TIR+TRADD-N+TM+TPR*→ TPR-repeats→ APATPase→ | TIR+TRADD-N+TM+TPR                 | 679  | HC891_08905 | Bacteria            | Candidatus Gracilibacteria bacterium  | toll/interleukin-1 receptor domain-containing protein [Candidatus Gracilibacteria bacterium]. | GCA_012031775.1 |
| NJO84451.1 | TRADD-N+TPR*→ TPR-repeats→                                       | TRADD-N+TPR                        | 271  | HC828_17885 | Alphaproteobacteria | Blastochloris sp.                     | tetratricopeptide repeat protein [Blastochloris sp.].                                         | GCA_012033475.1 |
| NJP07803.1 | TRADD-N*→    <-TCAD4+CASPASE+TM+TM+TM+TM+TM+TM                   | TRADD-N                            | 500  | HC837_20375 | Chloroflexi         | Chloroflexaceae bacterium             | hypothetical protein HC837_20375 [Chloroflexaceae bacterium].                                 | GCA_012034075.1 |
| NQS90905.1 | TRADD-N*→ HEPN→                                                  | TRADD-N                            | 490  | HQ574_00730 | Chloroflexi         | Chloroflexi bacterium                 | hypothetical protein HQ574_00730 [Chloroflexi bacterium].                                     | GCA_013202705.1 |
| OAE61635.1 | NTase+helical-region+TRADD-N+X*→                                 | NTase+helical-region+TRADD-N+X     | 526  | A7J71_09945 | betaproteobacteria  | Achromobacter insolitus               | hypothetical protein A7J71_09945 [Achromobacter insolitus].                                   | GCA_001641515.1 |
| OBQ35868.1 | TRADD-N-aHTH1+TRADD-N+Pentapeptide*→                             | TRADD-N-aHTH1+TRADD-N+Pentapeptide | 505  | AN487_14515 | cyanobacteria       | Anabaena sp. CRKS33                   | hypothetical protein AN487_14515 [Anabaena sp. CRKS33].                                       | GCA_001672075.1 |
| OCQ96999.1 | TRADD-N-aHTH1+TRADD-N+Pentapeptide*→                             | TRADD-N-aHTH1+TRADD-N+Pentapeptide | 342  | BCD64_15540 | cyanobacteria       | Nostoc sp. MBR 210                    | hypothetical protein BCD64_15540 [Nostoc sp. MBR 210].                                        | GCA_001698435.1 |
| OCY15932.1 | ECF-HTH+TRADD-N+Pentapeptide*→                                   | ECF-HTH+TRADD-N+Pentapeptide       | 350  | BEV12_00535 | cyanobacteria       | Microcystis aeruginosa CACIAM 03      | hypothetical protein BEV12_00535 [Microcystis aeruginosa CACIAM 03].                          | GCA_001706385.1 |
| ODV36416.1 | ECF-HTH+TRADD-N+Pentapeptide*→                                   | ECF-HTH+TRADD-N+Pentapeptide       | 403  | BFG60_4120  | cyanobacteria       | Microcystis aeruginosa NIES-98        | Pentapeptide repeat family protein [Microcystis aeruginosa NIES-98].                          | GCA_001725075.1 |
| OEU65679.1 | TRADD-N+NACHT+helical-region+TPRs*→ Pentapeptide→                | TRADD-N+NACHT+helical-region+TPRs  | 1359 | BBJ57_01575 | deltaproteobacteria | Desulfobacteriales bacterium PC51MH44 | hypothetical protein BBJ57_01575, partial [Desulfobacteriales bacterium PC51MH44].            | GCA_001751165.1 |
| OGA89041.1 | NTase+helical-region+TRADD-N+X*→                                 | NTase+helical-region+TRADD-N+X     | 510  | A2Z90_14570 | betaproteobacteria  | Burkholderiales bacterium GWA2_64_37  | hypothetical protein A2Z90_14570 [Burkholderiales bacterium GWA2_64_37].                      | GCA_001770675.1 |

| acc        | operon                                                                             | architecture                                  | len  | gen.name       | taxend              | species                                     | define                                                                         | gca             |
|------------|------------------------------------------------------------------------------------|-----------------------------------------------|------|----------------|---------------------|---------------------------------------------|--------------------------------------------------------------------------------|-----------------|
| OJJ27191.1 | HTH+TRADD-N+TPRs*→ EACC2+CASPASE+STAND+TPRs→                                       | HTH+TRADD-N+TPRs                              | 327  | BI308_01500    | cyanobacteria       | Roseofilum reptotaenium AO1-A               | hypothetical protein BI308_01500 [Roseofilum reptotaenium AO1-A]               | GCA_001890975.1 |
| OKH33849.1 | TRADD-N-aHTH1+TRADD-N+Pentapeptide*→                                               | TRADD-N-aHTH1+TRADD-N+Pentapeptide            | 578  | NIES2119_22150 | cyanobacteria       | Phormidium ambiguum IAM M-71                | hypothetical protein NIES2119_22150 [Phormidium ambiguum IAM M-71]             | GCA_001904725.1 |
| OLT63091.1 | TRADD-N-aHTH1+TRADD-N+Pentapeptide*→                                               | TRADD-N-aHTH1+TRADD-N+Pentapeptide            | 377  | BJP37_03960    | cyanobacteria       | Moorea bouillonii PNG                       | hypothetical protein BJP37_03960 [Moorea bouillonii PNG]                       | GCA_001942495.1 |
| OMQ34815.1 | NTase+helical-region+TRADD-N+X*→                                                   | NTase+helical-region+TRADD-N+X                | 520  | BKP54_32310    | alphaproteobacteria | Ensifer sp. 1H6                             | hypothetical protein BKP54_32310 [Ensifer sp. 1H6]                             | GCA_001976035.1 |
| OQW92716.1 | helical-region+TRADD-N+TPRs*→ EACC2+CASPASE+NACHT+68TM-wHTH+NACHT+68TM-wHTH→       | helical-region+TRADD-N+TPRs                   | 469  | BWK78_00820    | gammaproteobacteria | Thiotrichaceae bacterium IS1                | hypothetical protein BWK78_00820 [Thiotrichaceae bacterium IS1]                | GCA_002083855.1 |
| OQX07180.1 | TRADD-N+helical-region*→                                                           | TRADD-N+helical-region                        | 473  | BWK80_49815    | deltaproteobacteria | Desulfobacteraceae bacterium IS3            | hypothetical protein BWK80_49815 [Desulfobacteraceae bacterium IS3]            | GCA_002083955.1 |
| OUC12593.1 | TRADD-N-aHTH1+TRADD-N+Pentapeptide*→                                               | TRADD-N-aHTH1+TRADD-N+Pentapeptide            | 447  | B0A82_21820    | cyanobacteria       | Alkalinema sp. CACIAM 70d                   | hypothetical protein B0A82_21820 [Alkalinema sp. CACIAM 70d]                   | GCA_002148405.1 |
| OUL32398.1 | TRADD-N-aHTH1+TRADD-N+Pentapeptide*→                                               | TRADD-N-aHTH1+TRADD-N+Pentapeptide            | 387  | BV375_10070    | cyanobacteria       | Nostoc sp. 106C                             | hypothetical protein BV375_10070 [Nostoc sp. 106C]                             | GCA_002154725.1 |
| PBB89920.1 | wHTH+TIR→ STAND→ PNPase→ TRADD-N+STAND+wHTH+TPRs*→                                 | TRADD-N+STAND+wHTH+TPRs                       | 1433 | CK215_24450    | alphaproteobacteria | Mesorhizobium sp. WSM3864                   | hypothetical protein CK215_24450 [Mesorhizobium sp. WSM3864]                   | GCA_002294955.1 |
| PHJ69131.1 | TRADD-N-aHTH1+TRADD-N+Pentapeptide*→  <-?  TM→ TRADD-N-aHTH1+TRADD-N+Pentapeptide→ | TRADD-N-aHTH1+TRADD-N+Pentapeptide            | 417  | VF02_00530     | cyanobacteria       | Nostoc linckia z1                           | hypothetical protein VF02_00530 [Nostoc linckia z1]                            | GCA_002607965.1 |
| PHJ69278.1 | TRADD-N-aHTH1+TRADD-N+Pentapeptide→  <-?  TM→ TRADD-N-aHTH1+TRADD-N+Pentapeptide*→ | TRADD-N-aHTH1+TRADD-N+Pentapeptide            | 425  | VF02_00510     | cyanobacteria       | Nostoc linckia z1                           | hypothetical protein VF02_00510 [Nostoc linckia z1]                            | GCA_002607965.1 |
| PHJ73282.1 | TRADD-N-aHTH1+TRADD-N+Pentapeptide*→                                               | TRADD-N-aHTH1+TRADD-N+Pentapeptide            | 417  | VF05_01545     | cyanobacteria       | Nostoc linckia z3                           | hypothetical protein VF05_01545 [Nostoc linckia z3]                            | GCA_002608015.1 |
| PKP02884.1 | Calcineurin+TRADD-N+STAND+wHTH+helical-region*→                                    | Calcineurin+TRADD-N+STAND+wHTH+helical-region | 1155 | CVU11_10430    | bacteroidetes       | Bacteroidetes bacterium HGW-Bacteroidetes-6 | hypothetical protein CVU11_10430 [Bacteroidetes bacterium HGW-Bacteroidetes-6] | GCA_002842495.1 |
| PSB60411.1 | TRADD-N-aHTH1+TRADD-N+Pentapeptide*→                                               | TRADD-N-aHTH1+TRADD-N+Pentapeptide            | 530  | C7B79_25840    | cyanobacteria       | Chroococciopsis cubana CCALA 043            | hypothetical protein C7B79_25840, partial [Chroococciopsis cubana CCALA 043]   | GCA_003003835.1 |
| RAQ43000.1 | EAD4+TRADD-N*→                                                                     | EAD4+TRADD-N                                  | 223  | B9S53_11830    | cyanobacteria       | Arthrospira sp. O9.13F                      | hypothetical protein B9S53_11830, partial [Arthrospira sp. O9.13F]             | GCA_003268325.1 |
| RKS67322.1 | NTase+helical-region+TRADD-N+X*→                                                   | NTase+helical-region+TRADD-N+X                | 437  | DFS04_2001     | betaproteobacteria  | Herbaspirillum sp. XFZ15 10_5               | hypothetical protein DFS04_2001 [Herbaspirillum sp. XFZ15 10_5]                | GCA_003634405.1 |
| RLC20956.1 | CASPASE+TRADD-N+TM+TM+TM+IG+FGS*→                                                  | CASPASE+TRADD-N+TM+TM+TM+IG+FGS               | 879  | DRI57_03535    | Deltaproteobacteria | Deltaproteobacteria bacterium               | hypothetical protein DRI57_03535 [Deltaproteobacteria bacterium].              | GCA_003647425.1 |

| acc            | operon                                                                     | architecture                                       | len  | gen.name          | taxend              | species                      | define                                                                  | gca             |
|----------------|----------------------------------------------------------------------------|----------------------------------------------------|------|-------------------|---------------------|------------------------------|-------------------------------------------------------------------------|-----------------|
| RMF77178.1     | DrHyd+TRADD-N+TIR+TPR*→                                                    | DrHyd+TRADD-N+TIR+TPR                              | 580  | D6737_18470       | Chloroflexi         | Chloroflexi bacterium        | DUF4062 domain-containing protein [Chloroflexi bacterium].              | GCA_003695675.1 |
| RUS94453.1     | HTH+TRADD-N+Pentapeptide+TM+TM*→                                           | HTH+TRADD-N+Pentapeptide+TM+TM                     | 484  | DSM106972_093480  | Cyanobacteria       | Calothrix desertica PCC 7102 | hypothetical protein DSM106972_093480 [Calothrix desertica PCC 7102].   | GCA_003991905.1 |
| RWI99965.1     | Methylase_S→?→ HNH+TRADD-N+SF2-helicase*→                                  | HNH+TRADD-N+SF2-helicase                           | 1207 | EOR23_31910       | Alphaproteobacteria | Mesorhizobium sp.            | HsdR family type I site-specific deoxyribonuclease [Mesorhizobium sp.]. | GCA_004018865.1 |
| SCY06844.1     | NTase+helical-region+TRADD-N+NACHT+alpha-rich-tail*→                       | NTase+helical-region+TRADD-N+NACHT+alpha-rich-tail | 987  | SAMN05192588_097  | Bacteroidetes       | Nonlabens sp. Hel1_33_55     | hypothetical protein SAMN05192588_0977 [Nonlabens sp. Hel1_33_55]       | GCA_900101765.1 |
| SHF09466.1     | NTase+helical-region+TRADD-N+X*→                                           | NTase+helical-region+TRADD-N+X                     | 504  | SAMN02745157_1624 | Alphaproteobacteria | Kaistia soli DSM 19436       | hypothetical protein SAMN02745157_1624 [Kaistia soli DSM 19436]         | GCA_900129325.1 |
| SNS54311.1     | TRADD-N+Calcineurin*→                                                      | TRADD-N+Calcineurin                                | 465  | SAMN04488107_294  | Actinobacteria      | Geodermatophilus saharensis  | 3',5'-cyclic AMP phosphodiesterase CpdA [Geodermatophilus saharensis].  | GCA_900188205.1 |
| TEU17517.1     | TIR+TRADD-N+TM+CBM9*→                                                      | TIR+TRADD-N+TM+CBM9                                | 464  | E3J21_08170       | Chloroflexi         | Anaerolineales bacterium     | TIR domain-containing protein [Anaerolineales bacterium].               | GCA_004377365.1 |
| TXI20304.1     | SIG+TIR+TRADD-N+NACHT+68TM-wHTH*→   <-PCRF+RF-1                            | SIG+TIR+TRADD-N+NACHT+68TM-wHTH                    | 892  | E6Q62_02005       | Betaproteobacteria  | Nitrosomonas sp.             | TIR domain-containing protein [Nitrosomonas sp.].                       | GCA_008015565.1 |
| WP_002751650.1 | ECF-HTH+TRADD-N+Pentapeptide*→                                             | ECF-HTH+TRADD-N+Pentapeptide                       | 470  | -                 | cyanobacteria       | Microcystis aeruginosa       | pentapeptide repeat-containing protein [Microcystis aeruginosa]         | GCF_000307995.1 |
| WP_002759140.1 | ECF-HTH+TRADD-N+Pentapeptide*→                                             | ECF-HTH+TRADD-N+Pentapeptide                       | 450  | -                 | cyanobacteria       | Microcystis aeruginosa       | pentapeptide repeat-containing protein [Microcystis aeruginosa]         | GCF_000312165.1 |
| WP_002766355.1 | ECF-HTH+TRADD-N+Pentapeptide*→                                             | ECF-HTH+TRADD-N+Pentapeptide                       | 432  | -                 | cyanobacteria       | Microcystis aeruginosa       | hypothetical protein [Microcystis aeruginosa]                           | GCF_000312185.1 |
| WP_002781357.1 | ECF-HTH+TRADD-N+Pentapeptide*→                                             | ECF-HTH+TRADD-N+Pentapeptide                       | 405  | -                 | cyanobacteria       | Microcystis aeruginosa       | pentapeptide repeat-containing protein [Microcystis aeruginosa]         | GCF_000312725.1 |
| WP_002790455.1 | ECF-HTH+TRADD-N+Pentapeptide*→                                             | ECF-HTH+TRADD-N+Pentapeptide                       | 432  | -                 | cyanobacteria       | Microcystis aeruginosa       | pentapeptide repeat-containing protein [Microcystis aeruginosa]         | GCF_000312225.1 |
| WP_002790923.1 | ECF-HTH+TRADD-N+Pentapeptide*→                                             | ECF-HTH+TRADD-N+Pentapeptide                       | 425  | -                 | cyanobacteria       | Microcystis aeruginosa       | pentapeptide repeat-containing protein [Microcystis aeruginosa]         | GCF_000312245.1 |
| WP_002798711.1 | ECF-HTH+TRADD-N+Pentapeptide*→                                             | ECF-HTH+TRADD-N+Pentapeptide                       | 442  | -                 | cyanobacteria       | Microcystis aeruginosa       | pentapeptide repeat-containing protein [Microcystis aeruginosa]         | GCF_000312265.1 |
| WP_006508060.1 | TRADD-N+Pentapeptide*→                                                     | TRADD-N+Pentapeptide                               | 393  | -                 | cyanobacteria       | Xenococcus sp. PCC 7305      | pentapeptide repeat-containing protein [Xenococcus sp. PCC 7305]        | GCF_000332055.1 |
| WP_006624703.1 | EAD4+TRADD-N+STAND+wHTH+HEAT_repeats*→                                     | EAD4+TRADD-N+STAND+wHTH+HEAT_repeats               | 1746 | -                 | cyanobacteria       | Arthrospira platensis        | NACHT domain-containing protein [Arthrospira platensis]                 | GCF_000307915.1 |
| WP_006669967.1 | EAD4+TRADD-N+STAND+wHTH+HEAT_repeats*→                                     | EAD4+TRADD-N+STAND+wHTH+HEAT_repeats               | 1822 | -                 | cyanobacteria       | Arthrospira maxima           | NACHT domain-containing protein [Arthrospira maxima]                    | -               |
| WP_006669976.1 | HTH+TRADD-N+STAND+wHTH+HEAT_repeats*→                                      | HTH+TRADD-N+STAND+wHTH+HEAT_repeats                | 1177 | -                 | cyanobacteria       | Arthrospira maxima           | NACHT domain-containing protein [Arthrospira maxima]                    | -               |
| WP_007303210.1 | TRADD-N*→                                                                  | TRADD-N                                            | 131  | -                 | cyanobacteria       | Crocospaera watsonii         | hypothetical protein [Crocospaera watsonii]                             | GCF_000167195.1 |
| WP_007311526.1 | TRADD-N+Pentapeptide*→                                                     | TRADD-N+Pentapeptide                               | 323  | -                 | cyanobacteria       | Crocospaera watsonii         | pentapeptide repeat-containing protein [Crocospaera watsonii]           | GCF_000235665.1 |
| WP_007686738.1 | ZNR+HTH+HTH+TIR→ PNPase+TRADD-N+STAND+wHTH+TPRs*→??+HEPN→??+SIR2+??+STAND→ | PNPase+TRADD-N+STAND+wHTH+TPRs                     | 1737 | -                 | alphaproteobacteria | Sphingomonadaceae            | MULTISPECIES: hypothetical protein [Sphingomonadaceae]                  | GCF_000264945.2 |



| acc            | operon                                                                                                                        | architecture                         | len  | gen.name | taxend        | species                  | define                                                             | gca             |
|----------------|-------------------------------------------------------------------------------------------------------------------------------|--------------------------------------|------|----------|---------------|--------------------------|--------------------------------------------------------------------|-----------------|
| WP_008050000.1 | EAD4+TRADD-N+STAND+wHTH+HEAT_repeats*→                                                                                        | EAD4+TRADD-N+STAND+wHTH+HEAT_repeats | 1378 | -        | cyanobacteria | Arthrospira sp. PCC 8005 | NACHT domain-containing protein [Arthrospira sp. PCC 8005]         | GCF_000176895.2 |
| WP_008177582.1 | TRADD-N-aHTH1+TRADD-N+Pentapeptide*→                                                                                          | TRADD-N-aHTH1+TRADD-N+Pentapeptide   | 544  | -        | cyanobacteria | Moorea producens         | hypothetical protein [Moorea producens]                            | GCF_000211815.1 |
| WP_008190049.1 | TRADD-N-aHTH1+TRADD-N+Pentapeptide*→                                                                                          | TRADD-N-aHTH1+TRADD-N+Pentapeptide   | 383  | -        | cyanobacteria | Moorea producens         | low-complexity protein [Moorea producens]                          | GCF_000211815.1 |
| WP_008203869.1 | ECF-HTH+TRADD-N+Pentapeptide*→                                                                                                | ECF-HTH+TRADD-N+Pentapeptide         | 436  | -        | cyanobacteria | Microcystis sp. T1-4     | pentapeptide repeat-containing protein [Microcystis sp. T1-4]      | GCF_000297435.1 |
| WP_009545863.1 | preATP-grasp+BtrJ-ATPgrasp+alpha/beta-Hammerhead/Barrel-sandwich_hybrid→ TRADD-N+Pentapeptide*→ TM_region→ Aldose_epim→ tRNA→ | TRADD-N+Pentapeptide                 | 325  | -        | cyanobacteria | Cyanothece               | MULTISPECIES: pentapeptide repeat-containing protein [Cyanothece]  | GCF_000017845.1 |
| WP_012167159.1 | TPR-repeats+CASPASE→   <-?<-SIG+Pkinase+TM+TPR<-?<-?  ?→?→ PNPase+TRADD-N+HTH*→                                               | PNPase+TRADD-N+HTH                   | 576  | -        | Cyanobacteria | Acaryochloris marina     | hypothetical protein [Acaryochloris marina].                       | GCF_000018105.1 |
| WP_012362559.1 | HTH→ TRADD-N+TPRs*→  <-Pentapeptide+TM_region+Pentapeptide+EACC2+CASPASE                                                      | TRADD-N+TPRs                         | 348  | -        | cyanobacteria | Cyanothece               | MULTISPECIES: DUF1822 family protein [Cyanothece]                  | -               |
| WP_012599489.1 | TRADD-N-aHTH1+TRADD-N+TPRs*→ EACC2+CASPASE+APATPase+GUN4→??→                                                                  | TRADD-N-aHTH1+TRADD-N+TPRs           | 326  | -        | cyanobacteria | Cyanothece sp. PCC 7424  | hypothetical protein [Cyanothece sp. PCC 7424]                     | GCF_000021825.1 |
| WP_014276969.1 | EAD4+TRADD-N+STAND→ PSE→  <-EAD4+TRADD-N+STAND                                                                                | EAD4+TRADD-N+STAND                   | 525  | -        | cyanobacteria | Arthrospira platensis    | NACHT domain-containing protein [Arthrospira platensis]            | -               |
| WP_015117156.1 | EAD1+TRADD-N+GUN4*→ AAA+HEAT_repeats→ STAND+HEAT_repeats+TM→                                                                  | EAD1+TRADD-N+GUN4                    | 351  | -        | cyanobacteria | Rivularia sp. PCC 7116   | GUN4 protein [Rivularia sp. PCC 7116]                              | GCF_000316665.1 |
| WP_015117657.1 | TRADD-N+Pentapeptide*→                                                                                                        | TRADD-N+Pentapeptide                 | 312  | -        | cyanobacteria | Rivularia sp. PCC 7116   | pentapeptide repeat-containing protein [Rivularia sp. PCC 7116]    | GCF_000316665.1 |
| WP_015121169.1 | TRADD-N-aHTH1+TRADD-N+Pentapeptide*→                                                                                          | TRADD-N-aHTH1+TRADD-N+Pentapeptide   | 487  | -        | cyanobacteria | Rivularia sp. PCC 7116   | pentapeptide repeat-containing protein [Rivularia sp. PCC 7116]    | GCF_000316665.1 |
| WP_015121187.1 | ADH_N+ADH_zinc_N→ TRADD-N+Pentapeptide*→                                                                                      | TRADD-N+Pentapeptide                 | 436  | -        | cyanobacteria | Rivularia sp. PCC 7116   | putative low-complexity protein [Rivularia sp. PCC 7116]           | GCF_000316665.1 |
| WP_015128708.1 | helical-region+TRADD-N+TPRs*→ EACC2+CASPASE+DZR+DZR+Pkinase→                                                                  | helical-region+TRADD-N+TPRs          | 453  | -        | cyanobacteria | Calothrix sp. PCC 7507   | DUF1822 family protein [Calothrix sp. PCC 7507]                    | GCF_000316575.1 |
| WP_015139478.1 | TRADD-N-aHTH1+TRADD-N+TPRs*→                                                                                                  | TRADD-N-aHTH1+TRADD-N+TPRs           | 360  | -        | cyanobacteria | Nostoc sp. PCC 7524      | hypothetical protein [Nostoc sp. PCC 7524]                         | GCF_000316645.1 |
| WP_015148075.1 | EAD4+TRADD-N+TPRs*→ EACC2+CASPASE+TM_region→ Acetyltransf→                                                                    | EAD4+TRADD-N+TPRs                    | 415  | -        | cyanobacteria | Oscillatoria acuminata   | DUF1822 family protein [Oscillatoria acuminata]                    | -               |
| WP_015150426.1 | HTH+TRADD-N+TPRs*→                                                                                                            | HTH+TRADD-N+TPRs                     | 362  | -        | cyanobacteria | Oscillatoria acuminata   | DUF1822 family protein [Oscillatoria acuminata]                    | GCF_000317105.1 |
| WP_015195683.1 | HTH+TRADD-N+TPRs*→                                                                                                            | HTH+TRADD-N+TPRs                     | 433  | -        | cyanobacteria | Stanieria cyanosphaera   | DUF1822 family protein [Stanieria cyanosphaera]                    | GCF_000317575.1 |
| WP_015217750.1 | TRADD-N-aHTH1+TRADD-N+Pentapeptide*→                                                                                          | TRADD-N-aHTH1+TRADD-N+Pentapeptide   | 475  | -        | cyanobacteria | Anabaena cylindrica      | transcriptional regulator, XRE family [Anabaena cylindrica]        | GCF_000317695.1 |
| WP_016516706.1 | ECF-HTH+TRADD-N+Pentapeptide*→                                                                                                | ECF-HTH+TRADD-N+Pentapeptide         | 425  | -        | cyanobacteria | Microcystis aeruginosa   | pentapeptide repeat-containing protein [Microcystis aeruginosa]    | GCF_000412595.1 |
| WP_016562538.1 | TRADD-N-aHTH1+TRADD-N+Pentapeptide*→                                                                                          | TRADD-N-aHTH1+TRADD-N+Pentapeptide   | 459  | -        | cyanobacteria | Trichormus variabilis    | pentapeptide repeat-containing protein [Trichormus variabilis]     | -               |
| WP_016867683.1 | ??→ TRADD-N+TPRs*→ EACC2+CASPASE+CHASE2+TM+TM→ TM+beta_rich+TPRs→ TPRs+CASPASE→                                               | TRADD-N+TPRs                         | 204  | -        | cyanobacteria | Fischerella              | MULTISPECIES: DUF1822 family protein [Fischerella]                 | -               |
| WP_017298126.1 | HTH+HTH+TRADD-N+VMAP-M0*→                                                                                                     | HTH+HTH+TRADD-N+VMAP-M0              | 427  | -        | cyanobacteria | Nodosilinea nodulosa     | sigma-70 family RNA polymerase sigma factor [Nodosilinea nodulosa] | GCF_000309385.1 |

| acc            | operon                                                                              | architecture                            | len  | gen.name | taxend              | species                    | define                                                                          | gca             |
|----------------|-------------------------------------------------------------------------------------|-----------------------------------------|------|----------|---------------------|----------------------------|---------------------------------------------------------------------------------|-----------------|
| WP_017307182.1 | TRADD-N+helical-region*→                                                            | TRADD-N+helical-region                  | 543  | -        | cyanobacteria       | Spirulina subsalsa         | hypothetical protein [Spirulina subsalsa]                                       | GCF_000314005.1 |
| WP_017719549.1 | ??→ HTH+TRADD-N+TPRs*→ EACC2+CASPASE+BetaPropeller→                                 | HTH+TRADD-N+TPRs                        | 401  | -        | cyanobacteria       | Oscillatoria sp. PCC 10802 | DUF1822 family protein [Oscillatoria sp. PCC 10802]                             | GCF_000332335.1 |
| WP_019486969.1 | TRADD-N-aHTH1+TRADD-N+Pentapeptide*→                                                | TRADD-N-aHTH1+TRADD-N+Pentapeptide      | 490  | -        | cyanobacteria       | Kamptonema formosum        | pentapeptide repeat-containing protein [Kamptonema formosum]                    | GCF_000332155.1 |
| WP_019496109.1 | TRADD-N-aHTH1+TRADD-N+Pentapeptide*→                                                | TRADD-N-aHTH1+TRADD-N+Pentapeptide      | 768  | -        | cyanobacteria       | Calothrix sp. PCC 7103     | hypothetical protein [Calothrix sp. PCC 7103]                                   | GCF_000331305.1 |
| WP_019496191.1 | TRADD-N-aHTH1+TRADD-N+Pentapeptide+TPRs*→  <-?  TRADD-N-aHTH1+TRADD-N+Pentapeptide→ | TRADD-N-aHTH1+TRADD-N+Pentapeptide+TPRs | 702  | -        | cyanobacteria       | Calothrix sp. PCC 7103     | hypothetical protein [Calothrix sp. PCC 7103]                                   | -               |
| WP_019496192.1 | TRADD-N-aHTH1+TRADD-N+Pentapeptide+TPRs*→  <-TM+TM+TM                               | TRADD-N-aHTH1+TRADD-N+Pentapeptide      | 324  | -        | cyanobacteria       | Calothrix sp. PCC 7103     | pentapeptide repeat-containing protein [Calothrix sp. PCC 7103]                 | GCF_000331305.1 |
| WP_019496194.1 | TRADD-N-aHTH1+TRADD-N+Pentapeptide+TPRs*→  <-?  TRADD-N-aHTH1+TRADD-N+Pentapeptide→ | TRADD-N-aHTH1+TRADD-N+Pentapeptide+TPRs | 583  | -        | cyanobacteria       | Calothrix sp. PCC 7103     | hypothetical protein [Calothrix sp. PCC 7103]                                   | GCF_000331305.1 |
| WP_01949614.1  | TRADD-N-aHTH1+TRADD-N+Pentapeptide+TPRs*→  <-TM+TM+TM                               | TRADD-N-aHTH1+TRADD-N+Pentapeptide      | 950  | -        | cyanobacteria       | Calothrix sp. PCC 7103     | hypothetical protein [Calothrix sp. PCC 7103]                                   | -               |
| WP_019606632.1 | TM+helical-region→ TIR+TRADD-N*→                                                    | TIR+TRADD-N                             | 342  | -        | gammaproteobacteria | Teredinibacter turnerae    | toll/interleukin-1 receptor domain-containing protein [Teredinibacter turnerae] | GCF_000381665.1 |
| WP_020471543.1 | HTH+TRADD-N+TM+TM*→??→                                                              | HTH+TRADD-N+TM+TM                       | 461  | -        | planctomycetes      | Zavarzinella formosa       | hypothetical protein [Zavarzinella formosa]                                     | -               |
| WP_021831880.1 | TRADD-N*→                                                                           | TRADD-N                                 | 113  | -        | cyanobacteria       | Crocospaera watsonii       | hypothetical protein [Crocospaera watsonii]                                     | GCF_001039555.1 |
| WP_023669251.1 | HNH+TRADD-N+STAND+TPRs*→                                                            | HNH+TRADD-N+STAND+TPRs                  | 1617 | -        | alphaproteobacteria | Mesorhizobium              | MULTISPECIES: AAA family ATPase [Mesorhizobium]                                 | -               |
| WP_023692716.1 | HNH+TRADD-N+STAND+TPRs*→                                                            | HNH+TRADD-N+STAND+TPRs                  | 1617 | -        | alphaproteobacteria | Mesorhizobium              | MULTISPECIES: AAA family ATPase [Mesorhizobium]                                 | -               |
| WP_026099162.1 | HTH+TRADD-N+TPRs*→ Pentapeptide+TM_region+Pentapeptide+EACC2+CASPASE→               | HTH+TRADD-N+TPRs                        | 305  | -        | cyanobacteria       | Oscillatoria sp. PCC 10802 | DUF1822 family protein [Oscillatoria sp. PCC 10802]                             | -               |
| WP_026724013.1 | TRADD-N-aHTH1+TRADD-N+Pentapeptide*→                                                | TRADD-N-aHTH1+TRADD-N+Pentapeptide      | 426  | -        | cyanobacteria       | Fischerella sp. PCC 9431   | hypothetical protein [Fischerella sp. PCC 9431]                                 | GCF_000447295.1 |
| WP_027029362.1 | PNPase+TRADD-N+STAND+wHTH+TPRs*→ SIR2+??→                                           | PNPase+TRADD-N+STAND+wHTH+TPRs          | 1737 | -        | alphaproteobacteria | Mesorhizobium loti         | hypothetical protein [Mesorhizobium loti]                                       | GCF_013170845.1 |
| WP_029630437.1 | HTH+TRADD-N+TM+TM*→??→                                                              | HTH+TRADD-N+TM+TM                       | 435  | -        | planctomycetes      | Zavarzinella formosa       | XRE family transcriptional regulator [Zavarzinella formosa]                     | GCF_000255705.1 |
| WP_032992391.1 | NTase+helical-region+TRADD-N+X*→                                                    | NTase+helical-region+TRADD-N+X          | 511  | -        | alphaproteobacteria | Rhizobium leguminosarum    | hypothetical protein [Rhizobium leguminosarum]                                  | GCF_000427765.1 |
| WP_035737013.1 | EAD4+TRADD-N+STAND→  <-PSE<-EAD4+TRADD-N+STAND                                      | EAD4+TRADD-N+STAND                      | 525  | -        | cyanobacteria       | Arthrospira platensis      | NACHT domain-containing protein [Arthrospira platensis]                         | GCF_000175415.3 |
| WP_036402801.1 | ECF-HTH+TRADD-N+Pentapeptide*→                                                      | ECF-HTH+TRADD-N+Pentapeptide            | 405  | -        | cyanobacteria       | Microcystis aeruginosa     | pentapeptide repeat-containing protein [Microcystis aeruginosa]                 | GCF_000332585.1 |
| WP_041005222.1 | PNPase+TRADD-N+STAND+wHTH+TPRs*→                                                    | PNPase+TRADD-N+STAND+wHTH+TPRs          | 1731 | -        | alphaproteobacteria | Mesorhizobium plurifarum   | AAA family ATPase [Mesorhizobium plurifarum]                                    | -               |
| WP_042790997.1 | ECF-HTH+TRADD-N+Pentapeptide*→                                                      | ECF-HTH+TRADD-N+Pentapeptide            | 435  | -        | cyanobacteria       | Microcystis aeruginosa     | pentapeptide repeat-containing protein [Microcystis aeruginosa]                 | GCF_000330925.1 |
| WP_045056756.1 | helical-region+TRADD-N+TM*→                                                         | helical-region+TRADD-N+TM               | 333  | -        | cyanobacteria       | Aliterella atlantica       | hypothetical protein [Aliterella atlantica]                                     | -               |
| WP_045361906.1 | ECF-HTH+TRADD-N+Pentapeptide*→                                                      | ECF-HTH+TRADD-N+Pentapeptide            | 440  | -        | cyanobacteria       | Microcystis aeruginosa     | pentapeptide repeat-containing protein [Microcystis aeruginosa]                 | GCF_000787675.1 |

| acc            | operon                                                   | architecture                         | len  | gen.name | taxend              | species                          | define                                                                  | gca             |
|----------------|----------------------------------------------------------|--------------------------------------|------|----------|---------------------|----------------------------------|-------------------------------------------------------------------------|-----------------|
| WP_046320853.1 | HTH+TRADD-N+STAND+wHTH+HEAT_repeats*→                    | HTH+TRADD-N+STAND+wHTH+HEAT_repeats  | 1162 | -        | cyanobacteria       | Arthrospira                      | MULTISPECIES: NACHT domain-containing protein [Arthrospira]             | -               |
| WP_051502925.1 | helical-region+TRADD-N+TPRs*→ EACC2+CASPASE+DZR+Pkinase→ | helical-region+TRADD-N+TPRs          | 511  | -        | cyanobacteria       | [Scytonema hofmanni] UTEX B 1581 | DUF1822 family protein [[Scytonema hofmanni] UTEX B 1581]               | GCF_014698435.1 |
| WP_051503073.1 | TRADD-N-aHTH1+TRADD-N+Pentapeptide*→                     | TRADD-N-aHTH1+TRADD-N+Pentapeptide   | 383  | -        | cyanobacteria       | [Scytonema hofmanni] UTEX B 1581 | hypothetical protein [[Scytonema hofmanni] UTEX B 1581]                 | GCF_000582685.1 |
| WP_052277454.1 | ECF-HTH+TRADD-N+Pentapeptide*→                           | ECF-HTH+TRADD-N+Pentapeptide         | 432  | -        | cyanobacteria       | Microcystis aeruginosa           | pentapeptide repeat-containing protein [Microcystis aeruginosa]         | GCF_014218745.1 |
| WP_052490229.1 | helical-region+TRADD-N+TPRs*→                            | helical-region+TRADD-N+TPRs          | 469  | -        | cyanobacteria       | Tolypothrix campylonemoides      | DUF1822 family protein [Tolypothrix campylonemoides]                    | -               |
| WP_053458907.1 | HTH→ TRADD-N+Pentapeptide*→                              | TRADD-N+Pentapeptide                 | 252  | -        | cyanobacteria       | Hapalosiphon sp. MRB220          | pentapeptide repeat-containing protein [Hapalosiphon sp. MRB220]        | -               |
| WP_054359398.1 | PNPase+TRADD-N+STAND+wHTH+TPRs*→                         | PNPase+TRADD-N+STAND+wHTH+TPRs       | 1763 | -        | alphaproteobacteria | Prosthecomicrobium hirschii      | AAA family ATPase [Prosthecomicrobium hirschii]                         | GCF_001305515.1 |
| WP_054465896.1 | TM→??→ TRADD-N-aHTH1+TRADD-N+TPRs*→                      | TRADD-N-aHTH1+TRADD-N+TPRs           | 325  | -        | cyanobacteria       | Planktothricoides sp. SR001      | DUF1822 family protein [Planktothricoides sp. SR001]                    | GCF_001276715.1 |
| WP_054466474.1 | EAD4→ TRADD-N+TPRs*→ EACC2+CASPASE+TM_region→ TM+TM+TM→  | TRADD-N+TPRs                         | 287  | -        | cyanobacteria       | Planktothricoides sp. SR001      | DUF1822 family protein [Planktothricoides sp. SR001]                    | GCF_001276715.1 |
| WP_058183652.1 | TRADD-N-aHTH1+TRADD-N+Pentapeptide*→                     | TRADD-N-aHTH1+TRADD-N+Pentapeptide   | 404  | -        | cyanobacteria       | Mastigocoleus testarum           | pentapeptide repeat-containing protein [Mastigocoleus testarum]         | GCF_001456025.1 |
| WP_061431382.1 | ECF-HTH+TRADD-N+Pentapeptide*→                           | ECF-HTH+TRADD-N+Pentapeptide         | 427  | -        | cyanobacteria       | Microcystis aeruginosa           | pentapeptide repeat-containing protein [Microcystis aeruginosa]         | GCF_001578075.1 |
| WP_062291418.1 | TRADD-N-aHTH1+TRADD-N+Pentapeptide*→                     | TRADD-N-aHTH1+TRADD-N+Pentapeptide   | 350  | -        | cyanobacteria       | Nostoc piscinale                 | pentapeptide repeat-containing protein [Nostoc piscinale]               | GCF_001298445.1 |
| WP_062587307.1 | PNPase+TRADD-N+STAND+wHTH+TPRs*→ SLATT→                  | PNPase+TRADD-N+STAND+wHTH+TPRs       | 1417 | -        | alphaproteobacteria | Rhizobium sp. Leaf311            | ATP-binding protein [Rhizobium sp. Leaf311]                             | GCF_001423445.1 |
| WP_063712050.1 | TRADD-N-aHTH1+TRADD-N+Pentapeptide*→                     | TRADD-N-aHTH1+TRADD-N+Pentapeptide   | 463  | -        | cyanobacteria       | Coleofasciculus chthonoplastes   | pentapeptide repeat-containing protein [Coleofasciculus chthonoplastes] | GCF_000155555.1 |
| WP_064835079.1 | NTase+helical-region+TRADD-N+X*→                         | NTase+helical-region+TRADD-N+X       | 517  | -        | alphaproteobacteria | Rhizobium phaseoli               | hypothetical protein [Rhizobium phaseoli]                               | -               |
| WP_068789484.1 | EAD4+TRADD-N+STAND+wHTH+HEAT_repeats*→                   | EAD4+TRADD-N+STAND+wHTH+HEAT_repeats | 1398 | -        | cyanobacteria       | Phormidium willei                | NACHT domain-containing protein [Phormidium willei]                     | GCF_001637315.1 |
| WP_069475331.1 | ECF-HTH+TRADD-N+Pentapeptide*→                           | ECF-HTH+TRADD-N+Pentapeptide         | 410  | -        | cyanobacteria       | Microcystis aeruginosa           | pentapeptide repeat-containing protein [Microcystis aeruginosa]         | GCF_001725075.1 |
| WP_070393194.1 | TRADD-N-aHTH1+TRADD-N+Pentapeptide*→                     | TRADD-N-aHTH1+TRADD-N+Pentapeptide   | 514  | -        | cyanobacteria       | Moorea producens                 | hypothetical protein [Moorea producens]                                 | GCF_001767235.1 |
| WP_071102675.1 | TRADD-N-aHTH1+TRADD-N+Pentapeptide→                      | TRADD-N-aHTH1+TRADD-N+Pentapeptide   | 499  | -        | cyanobacteria       | Moorea producens                 | hypothetical protein [Moorea producens]                                 | GCF_001854205.1 |
| WP_071104586.1 | TRADD-N+Pentapeptide*→                                   | TRADD-N+Pentapeptide                 | 201  | -        | cyanobacteria       | Moorea producens                 | pentapeptide repeat-containing protein [Moorea producens]               | GCF_001854205.1 |
| WP_071107626.1 | TRADD-N-aHTH1+TRADD-N+Pentapeptide*→                     | TRADD-N-aHTH1+TRADD-N+Pentapeptide   | 568  | -        | cyanobacteria       | Moorea producens                 | pentapeptide repeat-containing protein [Moorea producens]               | GCF_001854205.1 |
| WP_072619436.1 | TRADD-N+helical-region*→                                 | TRADD-N+helical-region               | 533  | -        | cyanobacteria       | Spirulina major                  | hypothetical protein [Spirulina major]                                  | GCF_001890765.1 |
| WP_072722590.1 | HTH+TRADD-N+helical-region*→ TPR_region+CASPASE→         | HTH+TRADD-N+helical-region           | 316  | -        | cyanobacteria       | Planktothrix tepida              | XRE family transcriptional regulator [Planktothrix tepida]              | GCF_900009145.1 |

| acc            | operon                                                                             | architecture                                         | len  | gen.name | taxend              | species                            | define                                                                          | gca             |
|----------------|------------------------------------------------------------------------------------|------------------------------------------------------|------|----------|---------------------|------------------------------------|---------------------------------------------------------------------------------|-----------------|
| WP_072926218.1 | ECF-HTH+TRADD-N+Pentapeptide*→                                                     | ECF-HTH+TRADD-N+Pentapeptide                         | 352  | -        | cyanobacteria       | Microcystis aeruginosa             | pentapeptide repeat-containing protein, partial [Microcystis aeruginosa]        | GCF_001895325.1 |
| WP_073555229.1 | ??→ TRADD-N+TPRs*→ EACC2+CASPASE+CHASE2+TM+TM→ TM+beta_rich+TPRs→ TPRs+CASPASE→    | TRADD-N+TPRs                                         | 204  | -        | cyanobacteria       | Fischerella major                  | DUF1822 family protein [Fischerella major]                                      | -               |
| WP_073619092.1 | TRADD-N-aHTH1+TRADD-N+Pentapeptide+TPRs+Pentapeptide*→                             | TRADD-N-aHTH1+TRADD-N+Pentapeptide+TPRs+Pentapeptide | 782  | -        | cyanobacteria       | Calothrix sp. HK-06                | hypothetical protein [Calothrix sp. HK-06]                                      | GCF_001904745.1 |
| WP_075224986.1 | PNPase+TRADD-N+STAND+wHTH+TPRs*→                                                   | PNPase+TRADD-N+STAND+wHTH+TPRs                       | 1748 | -        | alphaproteobacteria | Rhizobium leguminosarum            | hypothetical protein [Rhizobium leguminosarum]                                  | GCF_001927265.1 |
| WP_077514517.1 | HNH+TRADD-N+SNF2-helicase+LPD33*→                                                  | HNH+TRADD-N+SNF2-helicase+LPD33                      | 1204 | -        | Gammaproteobacteria | Rhodanobacter sp. B05              | DEAD/DEAH box helicase family protein [Rhodanobacter sp. B05].                  | GCF_002001085.1 |
| WP_079209656.1 | ECF-HTH+TRADD-N+Pentapeptide+TRADD-N+Pentapeptide*→ DDE+DDE_Tnp_1→ Heme_oxygenase→ | ECF-HTH+TRADD-N+Pentapeptide+TRADD-N+Pentapeptide    | 620  | -        | cyanobacteria       | Microcystis aeruginosa             | pentapeptide repeat-containing protein [Microcystis aeruginosa]                 | -               |
| WP_080880220.1 | TIR+TRADD-N+NACHT+68TM+wHTH*→                                                      | TIR+TRADD-N+NACHT+68TM+wHTH                          | 917  | -        | nitrospirae         | Nitrospira sp. ND1                 | TIR domain-containing protein [Nitrospira sp. ND1]                              | GCF_900170025.1 |
| WP_081431064.1 | TRADD-N-aHTH1+TRADD-N+Pentapeptide*→                                               | TRADD-N-aHTH1+TRADD-N+Pentapeptide                   | 389  | -        | cyanobacteria       | Moorea bouillonii                  | pentapeptide repeat-containing protein [Moorea bouillonii]                      | GCF_001942495.1 |
| WP_081618935.1 | alpha-helical-protein→ TRADD-N+Pentapeptide*→ ISOCOT_Eif2b→                        | TRADD-N+Pentapeptide                                 | 383  | -        | cyanobacteria       | filamentous cyanobacterium ESFC-1  | hypothetical protein [filamentous cyanobacterium ESFC-1]                        | -               |
| WP_082241536.1 | TRADD-N+AB_hydrolase*→                                                             | TRADD-N+AB_hydrolase                                 | 362  | -        | alphaproteobacteria | Rhodovulum sulfidophilum           | hypothetical protein [Rhodovulum sulfidophilum]                                 | GCF_001548075.1 |
| WP_082348721.1 | ??→ TRADD-N+TPRs*→ BrnT_toxin→ CopG_antitoxin→                                     | TRADD-N+TPRs                                         | 188  | -        | cyanobacteria       | Planktothricoides sp. SR001        | DUF1822 family protein [Planktothricoides sp. SR001]                            | -               |
| WP_082728980.1 | PNPase+TRADD-N+STAND+wHTH+TPRs*→                                                   | PNPase+TRADD-N+STAND+wHTH+TPRs                       | 1725 | -        | betaproteobacteria  | Burkholderia sp. LA-2-3-30-S1-D2   | hypothetical protein [Burkholderia sp. LA-2-3-30-S1-D2]                         | GCF_001523915.2 |
| WP_083304982.1 | TRADD-N-aHTH1+TRADD-N+Pentapeptide*→                                               | TRADD-N-aHTH1+TRADD-N+Pentapeptide                   | 591  | -        | cyanobacteria       | Moorea producens                   | pentapeptide repeat-containing protein [Moorea producens]                       | -               |
| WP_083304983.1 | TRADD-N-aHTH1+TRADD-N+Pentapeptide→                                                | TRADD-N-aHTH1+TRADD-N+Pentapeptide                   | 487  | -        | cyanobacteria       | Moorea producens                   | pentapeptide repeat-containing protein [Moorea producens]                       | GCF_001767235.1 |
| WP_083304984.1 | TRADD-N-aHTH1+TRADD-N+Pentapeptide→                                                | TRADD-N-aHTH1+TRADD-N+Pentapeptide                   | 352  | -        | cyanobacteria       | Moorea producens                   | pentapeptide repeat-containing protein [Moorea producens]                       | GCF_001767235.1 |
| WP_083374064.1 | TRADD-N-aHTH1+TRADD-N+Pentapeptide→                                                | TRADD-N-aHTH1+TRADD-N+Pentapeptide                   | 372  | -        | cyanobacteria       | Moorea producens                   | pentapeptide repeat-containing protein [Moorea producens]                       | GCF_001854205.1 |
| WP_083604910.1 | TRADD-N+REC+HISKIN+REC*→                                                           | TRADD-N+REC+HISKIN+REC                               | 599  | -        | cyanobacteria       | Calothrix sp. HK-06                | response regulator [Calothrix sp. HK-06]                                        | -               |
| WP_083825169.1 | TM+TM+TM→ TIR→ TIR+TRADD-N+DsrC_HTH*→                                              | TIR+TRADD-N+DsrC_HTH                                 | 276  | -        | gammaproteobacteria | endosymbiont of Tevnia jerichonana | TusE/DsrC/DsvC family sulfur relay protein [endosymbiont of Tevnia jerichonana] | GCF_000224925.1 |
| WP_083853982.1 | HNH+TRADD-N+STAND+TPRs*→                                                           | HNH+TRADD-N+STAND+TPRs                               | 1629 | -        | alphaproteobacteria | Sinorhizobium sp. CCBAU 05631      | AAA family ATPase [Sinorhizobium sp. CCBAU 05631]                               | -               |
| WP_084555219.1 | CASPASE+HTH+TRADD-N+Pentapeptide*→                                                 | CASPASE+HTH+TRADD-N+Pentapeptide                     | 749  | -        | cyanobacteria       | Phormidium ambiguum                | CHAT domain-containing protein [Phormidium ambiguum]                            | -               |
| WP_084613256.1 | HTH+TRADD-N+STAND+HEAT_repeats*→                                                   | HTH+TRADD-N+STAND+HEAT_repeats                       | 1228 | -        | cyanobacteria       | Planktothrix rubescens             | NACHT domain-containing protein [Planktothrix rubescens]                        | GCF_000464785.1 |
| WP_086759910.1 | TRADD-N-aHTH1+TRADD-N+Pentapeptide*→                                               | TRADD-N-aHTH1+TRADD-N+Pentapeptide                   | 415  | -        | cyanobacteria       | Nostoc sp. 106C                    | hypothetical protein [Nostoc sp. 106C]                                          | GCF_002154725.1 |

| acc            | operon                                                                  | architecture                           | len  | gen.name | taxend              | species                     | define                                                                              | gca             |
|----------------|-------------------------------------------------------------------------|----------------------------------------|------|----------|---------------------|-----------------------------|-------------------------------------------------------------------------------------|-----------------|
| WP_086834672.1 | TRADD-N+Pentapeptide*→                                                  | TRADD-N+Pentapeptide                   | 120  | -        | cyanobacteria       | Nostoc sp. RF31Y            | hypothetical protein [Nostoc sp. RF31Y]                                             | GCF_002155185.1 |
| WP_086834681.1 | TM→ TRADD-N-aHTH1+TRADD-N+Pentapeptide*→                                | TRADD-N-aHTH1+TRADD-N+Pentapeptide     | 373  | -        | cyanobacteria       | Nostoc sp. RF31Y            | pentapeptide repeat-containing protein [Nostoc sp. RF31Y]                           | GCF_002155185.1 |
| WP_088240080.1 | TRADD-N+TPRs*→                                                          | TRADD-N+TPRs                           | 191  | -        | cyanobacteria       | Calothrix rhizosoleniae     | DUF1822 family protein [Calothrix rhizosoleniae]                                    | GCF_900185595.1 |
| WP_088430566.1 | TIR+TRADD-N+??*→ APATPase→ TPRs→                                        | TIR+TRADD-N+??                         | 347  | -        | cyanobacteria       | Halomicronema hongdechloris | toll/interleukin-1 receptor domain-containing protein [Halomicronema hongdechloris] | GCF_002075285.3 |
| WP_089126482.1 | TRADD-N-aHTH1+TRADD-N+Pentapeptide*→                                    | TRADD-N-aHTH1+TRADD-N+Pentapeptide     | 426  | -        | cyanobacteria       | Tolypothrix sp. NIES-4075   | hypothetical protein [Tolypothrix sp. NIES-4075]                                    | GCF_002218085.1 |
| WP_091585698.1 | HNH+TRADD-N+STAND+TPRs*→                                                | HNH+TRADD-N+STAND+TPRs                 | 1614 | -        | alphaproteobacteria | Mesorhizobium qingshengii   | AAA family ATPase [Mesorhizobium qingshengii]                                       | GCF_900103325.1 |
| WP_094530172.1 | HTH+TRADD-N+TPRs*→ EACC2+CASPASE+STAND+BetaPropeller+PDZ+BetaPropeller→ | HTH+TRADD-N+TPRs                       | 358  | -        | cyanobacteria       | Pseudanabaena sp. SR411     | DUF1822 family protein [Pseudanabaena sp. SR411]                                    | GCF_002251945.1 |
| WP_094672516.1 | TRADD-N+Pentapeptide*→                                                  | TRADD-N+Pentapeptide                   | 457  | -        | cyanobacteria       | Hydrocoleum sp. CS-953      | hypothetical protein [Hydrocoleum sp. CS-953]                                       | GCF_002260545.1 |
| WP_094672636.1 | helical-region+TRADD-N+TPRs*→ XisI→                                     | helical-region+TRADD-N+TPRs            | 356  | -        | cyanobacteria       | Hydrocoleum sp. CS-953      | DUF1822 family protein [Hydrocoleum sp. CS-953]                                     | GCF_002260545.1 |
| WP_094676040.1 | TRADD-N+Pentapeptide*→                                                  | TRADD-N+Pentapeptide                   | 439  | -        | cyanobacteria       | Hydrocoleum sp. CS-953      | hypothetical protein [Hydrocoleum sp. CS-953]                                       | -               |
| WP_095496078.1 | PNPase+TRADD-N+STAND+wHTH+TPRs*→                                        | PNPase+TRADD-N+STAND+wHTH+TPRs         | 1728 | -        | alphaproteobacteria | Mesorhizobium temperatum    | AAA family ATPase [Mesorhizobium temperatum]                                        | GCF_002284575.1 |
| WP_095825962.1 | wHTH+TIR→ STAND→ PNPase+TRADD-N+STAND+wHTH+TPRs*→                       | PNPase+TRADD-N+STAND+wHTH+TPRs         | 1770 | -        | alphaproteobacteria | Mesorhizobium sp. WSM3882   | hypothetical protein [Mesorhizobium sp. WSM3882]                                    | GCF_002294765.1 |
| WP_096606018.1 | HTH→ TRADD-N+TPRs*→ CASPASE+TM_region→ SIG+TM+Abi→                      | TRADD-N+TPRs                           | 196  | -        | cyanobacteria       | Calothrix sp. NIES-2100     | DUF1822 family protein [Calothrix sp. NIES-2100]                                    | GCF_002368195.1 |
| WP_096648825.1 | TRADD-N-aHTH1+TRADD-N+Pentapeptide*→                                    | TRADD-N-aHTH1+TRADD-N+Pentapeptide     | 478  | -        | cyanobacteria       | Calothrix brevissima        | pentapeptide repeat-containing protein [Calothrix brevissima]                       | GCF_002367995.1 |
| WP_096655265.1 | TRADD-N+Pentapeptide*→                                                  | TRADD-N+Pentapeptide                   | 445  | -        | cyanobacteria       | Calothrix parasitica        | hypothetical protein [Calothrix parasitica]                                         | GCF_002368095.1 |
| WP_096660958.1 | HTH→ TRADD-N+TPRs*→                                                     | TRADD-N+TPRs                           | 201  | -        | cyanobacteria       | Calothrix parasitica        | DUF1822 family protein [Calothrix parasitica]                                       | GCF_002368095.1 |
| WP_096691930.1 | ??→ CASPASE+TRADD-N+helical-region*→                                    | CASPASE+TRADD-N+helical-region         | 424  | -        | cyanobacteria       | Calothrix                   | MULTISPECIES: CHAT domain-containing protein [Calothrix]                            | GCF_002368455.1 |
| WP_096695037.1 | EAD1+TRADD-N+helical-region+HTH+HTH*→                                   | EAD1+TRADD-N+helical-region+HTH+HTH    | 514  | -        | cyanobacteria       | Calothrix                   | MULTISPECIES: sigma-70 family RNA polymerase sigma factor [Calothrix]               | GCF_002368455.1 |
| WP_096829425.1 | HTH+TRADD-N+TPRs*→                                                      | HTH+TRADD-N+TPRs                       | 365  | -        | cyanobacteria       | Tychonema bourrellyi        | DUF1822 family protein [Tychonema bourrellyi]                                       | -               |
| WP_099065822.1 | TM→ TRADD-N-aHTH1+TRADD-N+Pentapeptide*→                                | TRADD-N-aHTH1+TRADD-N+Pentapeptide     | 436  | -        | cyanobacteria       | Nostoc linckia              | hypothetical protein [Nostoc linckia]                                               | GCF_002607965.1 |
| WP_099065844.1 | TRADD-N+Pentapeptide→?→  <-?  TM→ TRADD-N-aHTH1+TRADD-N+Pentapeptide*→  | TRADD-N-aHTH1+TRADD-N+Pentapeptide     | 453  | -        | cyanobacteria       | Nostoc linckia              | transcriptional regulator, XRE family protein [Nostoc linckia]                      | GCF_002607965.1 |
| WP_099066009.1 | TRADD-N+Pentapeptide*→?→  <-?  TM→ TRADD-N-aHTH1+TRADD-N+Pentapeptide→  | TRADD-N+Pentapeptide                   | 367  | -        | cyanobacteria       | Nostoc linckia              | hypothetical protein [Nostoc linckia]                                               | GCF_002607965.1 |
| WP_099076546.1 | TRADD-N+Pentapeptide*→?→  <-?  TM→ TRADD-N-aHTH1+TRADD-N+Pentapeptide→  | TRADD-N+Pentapeptide                   | 367  | -        | cyanobacteria       | Nostoc linckia              | hypothetical protein [Nostoc linckia]                                               | GCF_002608015.1 |
| WP_099148846.1 | HsdM_N+METHYLASE→ TRD+TRD→ REase+SF2+Helicase_C+EcoR124_C+TRADD-N*→     | REase+SF2+Helicase_C+EcoR124_C+TRADD-N | 1190 | -        | bacteroidetes       | Lewinella nigricans         | type I restriction endonuclease subunit R [Lewinella nigricans]                     | GCF_002646595.1 |

| acc            | operon                                                                                                   | architecture                       | len  | gen.name      | taxend              | species                         | define                                                                                  | gca             |
|----------------|----------------------------------------------------------------------------------------------------------|------------------------------------|------|---------------|---------------------|---------------------------------|-----------------------------------------------------------------------------------------|-----------------|
| WP_099153795.1 | TRADD-N+Pentapeptide*→                                                                                   | TRADD-N+Pentapeptide               | 340  | -             | bacteroidetes       | Lewinella nigricans             | pentapeptide repeat-containing protein [Lewinella nigricans]                            | GCF_002646595.1 |
| WP_100903218.1 | TRADD-N-aHTH1+TRADD-N+Pentapeptide*→                                                                     | TRADD-N-aHTH1+TRADD-N+Pentapeptide | 450  | -             | cyanobacteria       | Nostoc flagelliforme            | pentapeptide repeat-containing protein [Nostoc flagelliforme]                           | GCF_002813575.1 |
| WP_102179539.1 | wHTH?→ TRADD-N+TPRs*→ PSE→ TPRs+CASPASE→                                                                 | TRADD-N+TPRs                       | 204  | -             | cyanobacteria       | Fischerella thermalis           | DUF1822 family protein [Fischerella thermalis]                                          | -               |
| WP_103112689.1 | ECF-HTH+TRADD-N+Pentapeptide*→                                                                           | ECF-HTH+TRADD-N+Pentapeptide       | 420  | -             | cyanobacteria       | Microcystis aeruginosa          | pentapeptide repeat-containing protein [Microcystis aeruginosa]                         | GCF_002897315.1 |
| WP_103127034.1 | TRADD-N-aHTH1+TRADD-N+Pentapeptide*→                                                                     | TRADD-N-aHTH1+TRADD-N+Pentapeptide | 409  | -             | cyanobacteria       | Nostoc cycadae                  | pentapeptide repeat-containing protein [Nostoc cycadae]                                 | -               |
| WP_103127406.1 | ECF-HTH+TRADD-N+Pentapeptide*→                                                                           | ECF-HTH+TRADD-N+Pentapeptide       | 420  | -             | cyanobacteria       | Microcystis aeruginosa          | pentapeptide repeat-containing protein [Microcystis aeruginosa]                         | GCF_002897275.1 |
| WP_105530726.1 | TRADD-N*→??→                                                                                             | TRADD-N                            | 168  | -             | betaproteobacteria  | Solimicrobium silvestre         | hypothetical protein [Solimicrobium silvestre]                                          | GCF_002976435.1 |
| WP_106168212.1 | TM+TRADD-N+TM+TM*→                                                                                       | TM+TRADD-N+TM+TM                   | 354  | -             | cyanobacteria       | Chroococcidiopsis cubana        | hypothetical protein [Chroococcidiopsis cubana]                                         | GCF_003003835.1 |
| WP_106216281.1 | TRADD-N+TM+TM*→ Haemagg_act→ Haemagg_act→ SIG+TPRs+CASPASE→                                              | TRADD-N+TM+TM                      | 556  | -             | cyanobacteria       | Cyanosarcina burmensis          | pentapeptide repeat-containing protein [Cyanosarcina burmensis]                         | GCF_003004015.1 |
| WP_106303880.1 | all-helical-protein→ TRADD-N+helical-region*→                                                            | TRADD-N+helical-region             | 295  | -             | cyanobacteria       | Chamaesiphon polymorphus        | hypothetical protein [Chamaesiphon polymorphus]                                         | GCF_003003845.1 |
| WP_106868049.1 | SIG+TM+TM→ TM+TRADD-N*→ TM+all-helical-region→                                                           | TM+TRADD-N                         | 190  | -             | cyanobacteria       | filamentous cyanobacterium CCP4 | hypothetical protein [filamentous cyanobacterium CCP4]                                  | -               |
| WP_106903024.1 | SIG+TM+TM→ TM+TRADD-N*→ TM+all-helical-region→                                                           | TM+TRADD-N                         | 177  | -             | cyanobacteria       | filamentous cyanobacterium CCT1 | hypothetical protein [filamentous cyanobacterium CCT1]                                  | -               |
| WP_106922102.1 | HTH→ TIR+TRADD-N+??*→ APATPase+TPRs→                                                                     | TIR+TRADD-N+??                     | 349  | -             | cyanobacteria       | filamentous cyanobacterium CCP3 | toll/interleukin-1 receptor domain-containing protein [filamentous cyanobacterium CCP3] | -               |
| WP_110578064.1 | ECF-HTH+TRADD-N+Pentapeptide*→                                                                           | ECF-HTH+TRADD-N+Pentapeptide       | 539  | -             | cyanobacteria       | Microcystis aeruginosa          | pentapeptide repeat-containing protein [Microcystis aeruginosa]                         | GCF_003206555.1 |
| WP_124033433.1 | Coiled-coil+TRADD-N+TM*→                                                                                 | Coiled-coil+TRADD-N+TM             | 415  | -             | Chloroflexi         | Herpetosiphon llansteffanensis  | hypothetical protein [Herpetosiphon llansteffanensis].                                  | GCF_003205875.1 |
| WP_153009599.1 | TRADD-N+Pentapeptide*→                                                                                   | TRADD-N+Pentapeptide               | 370  | -             | Cyanobacteria       | Mastigocoleus testarum          | pentapeptide repeat-containing protein [Mastigocoleus testarum].                        | -               |
| WP_153228487.1 | HTH+TRADD-N+Pentapeptide*→                                                                               | HTH+TRADD-N+Pentapeptide           | 487  | -             | Cyanobacteria       | Nostocaceae                     | MULTISPECIES: pentapeptide repeat-containing protein [Nostocaceae].                     | GCF_009498015.1 |
| WP_162271610.1 | bDLD3→?→ McrA-NTD+HNH→?→  <-?  ?→?→ PNPase+TRADD-N+CASPASE+bDLD3*→ APATPase+TPR+TPR→  <-?<-?  SIG+NPCBM→ | PNPase+TRADD-N+CASPASE+bDLD3       | 816  | VT84_RS06140  | Planctomycetes      | Gemmata sp. SH-PL17             | caspace family protein [Gemmata sp. SH-PL17].                                           | GCF_001610855.1 |
| WP_162666668.1 | SIG+TPR→  <-?  ?→?→?→  <-?  ?→ ACYC+FGS+TRADD-N+CASPASE*→?→ MoxR-AAA→ PSE→ FGS→ FGS→ FGS→ FGS→           | ACYC+FGS+TRADD-N+CASPASE           | 622  | SOIL9_RS04980 | Planctomycetes      | Gemmata massiliana              | hypothetical protein [Gemmata massiliana].                                              | -               |
| WP_163926701.1 | HTH+TRADD-N+Pentapeptide*→                                                                               | HTH+TRADD-N+Pentapeptide           | 511  | -             | Cyanobacteria       | Nostoc sp. UIC 10630            | pentapeptide repeat-containing protein [Nostoc sp. UIC 10630].                          | GCF_010747425.1 |
| WP_172109858.1 | Methylase_S→ HNH+TRADD-N+SF2-helicase*→ PSE→?→?→   <-?<-TPR-repeats                                      | HNH+TRADD-N+SF2-helicase           | 1180 | -             | Alphaproteobacteria | Bradyrhizobium sp. 83012        | HsdR family type I site-specific deoxyribonuclease [Bradyrhizobium sp. 83012].          | GCF_013178925.1 |

| acc            | operon                                                                                                               | architecture                           | len  | gen.name    | taxend        | species                    | define                                                                   | gca             |
|----------------|----------------------------------------------------------------------------------------------------------------------|----------------------------------------|------|-------------|---------------|----------------------------|--------------------------------------------------------------------------|-----------------|
| WP_190623519.1 | HTH+TRADD-N+Pentapeptide*→                                                                                           | HTH+TRADD-N+Pentapeptide               | 386  | -           | Cyanobacteria | Calothrix membranacea      | pentapeptide repeat-containing protein, partial [Calothrix membranacea]. | GCF_014696315.1 |
| WP_190677679.1 | HTH+TRADD-N+Pentapeptide*→                                                                                           | HTH+TRADD-N+Pentapeptide               | 362  | -           | Cyanobacteria | Nostoc sp. FACHB-190       | pentapeptide repeat-containing protein [Nostoc sp. FACHB-190].           | GCF_014696905.1 |
| WP_190734619.1 | TRADD-N+TM+TM+TM+TM+TM+TM+TM+Pentapeptide*→ Pentapeptide-repeats→?→   <-?  ?→<br>Pentapeptide+TM+TM+TM+Pentapeptide→ | TRADD-N+TM+TM+TM+TM+TM+TM+Pentapeptide | 884  | -           | Cyanobacteria | Nostoc sp. FACHB-888       | pentapeptide repeat-containing protein [Nostoc sp. FACHB-888].           | GCF_014696655.1 |
| WP_190756292.1 | <-Methylase_S<-?<-?<-?  HTH+TRADD-N+Pentapeptide*→   <-?<-PSE<-?<-?<-TPR-repeats+CASPASE                             | HTH+TRADD-N+Pentapeptide               | 478  | -           | Cyanobacteria | Nostoc sp. FACHB-145       | pentapeptide repeat-containing protein [Nostoc sp. FACHB-145].           | GCF_014697455.1 |
| WP_193968417.1 | TIR→ TRADD-N*→                                                                                                       | TRADD-N                                | 311  | -           | Cyanobacteria | Nodosilinea sp. LEGE 07088 | hypothetical protein [Nodosilinea sp. LEGE 07088].                       | GCF_015207395.1 |
| WP_198126279.1 | HTH+TRADD-N+Pentapeptide*→                                                                                           | HTH+TRADD-N+Pentapeptide               | 558  | -           | Cyanobacteria | Nostoc sp. CENA67          | pentapeptide repeat-containing protein [Nostoc sp. CENA67].              | GCF_016056305.1 |
| WP_199349019.1 | HTH+TRADD-N+Pentapeptide*→                                                                                           | HTH+TRADD-N+Pentapeptide               | 1121 | -           | Cyanobacteria | Calothrix sp. FACHB-156    | pentapeptide repeat-containing protein [Calothrix sp. FACHB-156].        | GCF_014697055.1 |
| YP_009217716.1 | ??→ TRADD-N+Pentapeptide*→ Pentapeptide→ SIG→??→                                                                     | TRADD-N+Pentapeptide                   | 300  | AVV41_gp032 | caudovirales  | Microcystis phage MaMV-DC  | hypothetical protein MaMVDC_32 [Microcystis phage MaMV-DC]               | GCF_001505175.1 |
