# Supplementary material for: Bacterial death and TRADD-N domains help define novel apoptosis and immunity mechanisms shared by prokaryotes and metazoans
Source: PubMed Central journal article supplement (PMC8195603; doi:10.7554/elife.70394), 2021-06-01
Supplement: elife-70394-fig4-data2.pdf [file elife-70394-fig4-data2.pdf]

Non-redundant counts of TRADD-N domains in eukaryotic lineages

| GCA | taxonomy                     | count           |     |
|-----|------------------------------|-----------------|-----|
|     | Amphimedon queenslandica     | GCF_000090795.1 | 307 |
|     | Branchiostoma floridae       | GCF_000003815.1 | 113 |
|     | Stylophora pistillata        | GCF_002571385.1 | 86  |
|     | Acropora digitifera          | GCF_000222465.1 | 83  |
|     | Branchiostoma belcheri       | GCF_001625305.1 | 77  |
|     | Branchiostoma floridae       | GCA_000003815.1 | 65  |
|     | Orbicella faveolata          | GCF_002042975.1 | 61  |
|     | Stylophora pistillata        | GCA_002571385.1 | 52  |
|     | Crassostrea gigas            | GCF_000297895.1 | 35  |
|     | Crassostrea virginica        | GCF_002022765.2 | 32  |
|     | Lingula anatina              | GCF_001039355.2 | 31  |
|     | Saccoglossus kowalevskii     | GCF_000003605.2 | 24  |
|     | Exaiptasia pallida           | GCA_001417965.1 | 17  |
|     | Pocillopora damicornis       | GCA_003704095.1 | 17  |
|     | Acanthaster planci           | GCF_001949145.1 | 15  |
|     | Exaiptasia pallida           | GCF_001417965.1 | 12  |
|     | Apostichopus japonicus       | GCA_002754855.1 | 9   |
|     | Mizuhopecten yessoensis      | GCF_002113885.1 | 9   |
|     | Capitella teleta             | GCA_000328365.1 | 8   |
|     | Carassius auratus            | GCF_003368295.1 | 8   |
|     | Oncorhynchus kisutch         | GCF_002021735.1 | 8   |
|     | Oncorhynchus mykiss          | GCF_002163495.1 | 8   |
|     | Salmo salar                  | GCF_000233375.1 | 8   |
|     | Sinocyclocheilus anshuiensis | GCF_001515605.1 | 8   |
|     | Sinocyclocheilus rhinoceros  | GCF_001515625.1 | 8   |
|     | Nematostella vectensis       | GCF_000209225.1 | 8   |
|     | Limulus polyphemus           | GCF_000517525.1 | 7   |
|     | Xenopus laevis               | GCF_001663975.1 | 7   |
|     | Cyprinus carpio              | GCA_001270105.1 | 7   |
|     | Salvelinus alpinus           | GCF_002910315.2 | 7   |
|     | Sinocyclocheilus grahami     | GCF_001515645.1 | 7   |
|     | Cyprinus carpio              | GCF_000951615.1 | 6   |
|     | Heterocephalus glaber        | GCA_000230445.1 | 5   |
|     | Microtus ochrogaster         | GCF_000317375.1 | 5   |

| GCA | taxonomy                            | count           |   |
|-----|-------------------------------------|-----------------|---|
|     | Odocoileus virginianus texanus      | GCF_002102435.1 | 5 |
|     | Phascolarctos cinereus              | GCF_002099425.1 | 5 |
|     | Rhincodon typus                     | GCF_001642345.1 | 5 |
|     | Oncorhynchus tshawytscha            | GCF_002872995.1 | 5 |
|     | Paramormyrops kingsleyae            | GCF_002872115.1 | 5 |
|     | Lottia gigantea                     | GCF_000327385.1 | 5 |
|     | Pogona vitticeps                    | GCF_900067755.1 | 4 |
|     | Theropithecus gelada                | GCF_003255815.1 | 4 |
|     | Ailuropoda melanoleuca              | GCF_000004335.2 | 4 |
|     | Alligator mississippiensis          | GCA_000281125.4 | 4 |
|     | Alligator sinensis                  | GCF_000455745.1 | 4 |
|     | Anolis carolinensis                 | GCF_000090745.1 | 4 |
|     | Apteryx australis mantelli          | GCF_001039765.1 | 4 |
|     | Balaenoptera acutorostrata scammoni | GCF_000493695.1 | 4 |
|     | Bos taurus                          | GCF_002263795.1 | 4 |
|     | Bubalus bubalis                     | GCF_003121395.1 | 4 |
|     | Calidris pugnax                     | GCF_001431845.1 | 4 |
|     | Callithrix jacchus                  | GCF_000004665.1 | 4 |
|     | Camelus ferus                       | GCF_000311805.1 | 4 |
|     | Canis lupus familiaris              | GCF_000002285.3 | 4 |
|     | Cariama cristata                    | GCA_000690535.1 | 4 |
|     | Carlito syrichta                    | GCF_000164805.1 | 4 |
|     | Castor canadensis                   | GCF_001984765.1 | 4 |
|     | Cavia porcellus                     | GCF_000151735.1 | 4 |
|     | Cebus capucinus imitator            | GCF_001604975.1 | 4 |
|     | Cercocebus atys                     | GCF_000955945.1 | 4 |
|     | Chaetura pelagica                   | GCF_000747805.1 | 4 |
|     | Chinchilla lanigera                 | GCF_000276665.1 | 4 |
|     | Chrysemys picta bellii              | GCF_000241765.3 | 4 |
|     | Chrysochloris asiatica              | GCF_000296735.1 | 4 |
|     | Dasypus novemcinctus                | GCF_000208655.1 | 4 |
|     | Desmodus rotundus                   | GCF_002940915.1 | 4 |
|     | Dipodomys ordii                     | GCF_000151885.1 | 4 |
|     | Echinops telfairi                   | GCF_000313985.2 | 4 |

| GCA                         | taxonomy         | count |
|-----------------------------|------------------|-------|
| Elephantulus edwardii       | GCF_000299155.1  | 4     |
| Erinaceus europaeus         | GCF_000296755.1  | 4     |
| Gekko japonicus             | GCF_001447785.1  | 4     |
| Heterocephalus glaber       | GCF_000247695.1  | 4     |
| Hipposideros armiger        | GCF_001890085.1  | 4     |
| Homo sapiens                | GCF_000001405.39 | 4     |
| Ictidomys tridecemlineatus  | GCF_000236235.1  | 4     |
| Jaculus jaculus             | GCF_000280705.1  | 4     |
| Latimeria chalumnae         | GCF_000225785.1  | 4     |
| Leptonychotes weddellii     | GCF_000349705.1  | 4     |
| Lipotes vexillifer          | GCF_000442215.1  | 4     |
| Loxodonta africana          | GCF_000001905.1  | 4     |
| Manis javanica              | GCF_001685135.1  | 4     |
| Marmota marmota marmota     | GCF_001458135.1  | 4     |
| Meriones unguiculatus       | GCF_002204375.1  | 4     |
| Mesocricetus auratus        | GCF_000349665.1  | 4     |
| Miniopterus natalensis      | GCF_001595765.1  | 4     |
| Monodelphis domestica       | GCF_000002295.2  | 4     |
| Mus caroli                  | GCF_900094665.1  | 4     |
| Mus musculus                | GCF_000001635.26 | 4     |
| Mustela putorius furo       | GCF_000215625.1  | 4     |
| Myotis brandtii             | GCF_000412655.1  | 4     |
| Myotis davidii              | GCF_000327345.1  | 4     |
| Myotis lucifugus            | GCF_000147115.1  | 4     |
| Nannospalax galili          | GCF_000622305.1  | 4     |
| Nanorana parkeri            | GCF_000935625.1  | 4     |
| Neotoma lepida              | GCA_001675575.1  | 4     |
| Nipponia nippon             | GCF_000708225.1  | 4     |
| Ochotona princeps           | GCF_000292845.1  | 4     |
| Octodon degus               | GCF_000260255.1  | 4     |
| Odobenus rosmarus divergens | GCF_000321225.1  | 4     |
| Orcinus orca                | GCF_000331955.2  | 4     |
| Orycteropus afer afer       | GCF_000298275.1  | 4     |
| Otolemur garnettii          | GCF_000181295.1  | 4     |

| GCA                            | taxonomy        | count |
|--------------------------------|-----------------|-------|
| Panthera pardus                | GCF_001857705.1 | 4     |
| Panthera tigris altaica        | GCF_000464555.1 | 4     |
| Pelodiscus sinensis            | GCF_000230535.1 | 4     |
| Peromyscus maniculatus bairdii | GCF_000500345.1 | 4     |
| Pongo abelii                   | GCF_002880775.1 | 4     |
| Protobothrops mucrosquamatus   | GCF_001527695.2 | 4     |
| Pseudopodoces humilis          | GCF_000331425.1 | 4     |
| Pteropus alecto                | GCF_000325575.1 | 4     |
| Python bivittatus              | GCF_000186305.1 | 4     |
| Rattus norvegicus              | GCF_000002265.2 | 4     |
| Rousettus aegyptiacus          | GCF_001466805.2 | 4     |
| Sorex araneus                  | GCF_000181275.1 | 4     |
| Sus scrofa                     | GCF_000003025.6 | 4     |
| Thamnophis sirtalis            | GCF_001077635.1 | 4     |
| Trichechus manatus latirostris | GCF_000243295.1 | 4     |
| Tupaia chinensis               | GCF_000334495.1 | 4     |
| Ursus maritimus                | GCF_000687225.1 | 4     |
| Xenopus tropicalis             | GCF_000004195.3 | 4     |
| Acanthochromis polyacanthus    | GCF_002109545.1 | 4     |
| Amphiprion ocellaris           | GCF_002776465.1 | 4     |
| Austrofundulus limnaeus        | GCF_001266775.1 | 4     |
| Boleophthalmus pectinirostris  | GCF_000788275.1 | 4     |
| Clupea harengus                | GCF_000966335.1 | 4     |
| Cynoglossus semilaevis         | GCF_000523025.1 | 4     |
| Cyprinodon variegatus          | GCF_000732505.1 | 4     |
| Danio rerio                    | GCF_000002035.6 | 4     |
| Esox lucius                    | GCF_004634155.1 | 4     |
| Fundulus heteroclitus          | GCF_000826765.1 | 4     |
| Gambusia affinis               | GCA_003097735.1 | 4     |
| Hippocampus comes              | GCF_001891065.1 | 4     |
| Ictalurus punctatus            | GCF_001660625.1 | 4     |
| Kryptolebias marmoratus        | GCF_001649575.1 | 4     |
| Lates calcarifer               | GCF_001640805.1 | 4     |
| Lepisosteus oculatus           | GCF_000242695.1 | 4     |

| GCA                        | taxonomy        | count |
|----------------------------|-----------------|-------|
| Maylandia zebra            | GCF_000238955.4 | 4     |
| Monopterus albus           | GCF_001952655.1 | 4     |
| Neolamprologus brichardi   | GCF_000239395.1 | 4     |
| Nothobranchius furzeri     | GCF_001465895.1 | 4     |
| Notothenia coriiceps       | GCF_000735185.1 | 4     |
| Oncorhynchus mykiss        | GCA_900005705.1 | 4     |
| Oreochromis niloticus      | GCF_001858045.2 | 4     |
| Oryzias latipes            | GCF_002234675.1 | 4     |
| Oryzias melastigma         | GCF_002922805.1 | 4     |
| Paralichthys olivaceus     | GCF_001970005.1 | 4     |
| Poecilia formosa           | GCF_000485575.1 | 4     |
| Poecilia reticulata        | GCF_000633615.1 | 4     |
| Pundamilia nyererei        | GCF_000239375.1 | 4     |
| Pygocentrus nattereri      | GCF_001682695.1 | 4     |
| Scophthalmus maximus       | GCA_003186165.1 | 4     |
| Seriola dumerili           | GCF_002260705.1 | 4     |
| Seriola lalandi dorsalis   | GCF_002814215.1 | 4     |
| Stegastes partitus         | GCF_000690725.1 | 4     |
| Xiphophorus maculatus      | GCF_002775205.1 | 4     |
| Pomacea canaliculata       | GCF_003073045.1 | 4     |
| Octopus bimaculoides       | GCF_001194135.1 | 4     |
| Aplysia californica        | GCF_000002075.1 | 4     |
| Cervus elaphus hippelaphus | GCA_002197005.1 | 3     |
| Hirundo rustica rustica    | GCA_003692655.1 | 3     |
| Chelonia mydas             | GCA_000344595.1 | 3     |
| Alligator mississippiensis | GCF_000281125.3 | 3     |
| Amazona aestiva            | GCA_001420675.1 | 3     |
| Aotus nancymae             | GCF_000952055.2 | 3     |
| Aptenodytes forsteri       | GCF_000699145.1 | 3     |
| Bos indicus                | GCF_000247795.1 | 3     |
| Bos mutus                  | GCA_000298355.1 | 3     |
| Bos mutus                  | GCF_000298355.1 | 3     |
| Callipepla squamata        | GCA_002218305.1 | 3     |
| Callorhynchus milii        | GCF_000165045.1 | 3     |

| GCA                                         | taxonomy        | count |
|---------------------------------------------|-----------------|-------|
| Callorhinus ursinus                         | GCF_003265705.1 | 3     |
| Camelus ferus                               | GCA_000311805.2 | 3     |
| Capra hircus                                | GCF_001704415.1 | 3     |
| Cariama cristata                            | GCF_000690535.1 | 3     |
| Ceratotherium simum simum                   | GCF_000283155.1 | 3     |
| Charadrius vociferus                        | GCA_000708025.2 | 3     |
| Charadrius vociferus                        | GCF_000708025.1 | 3     |
| Columba livia                               | GCF_000337935.1 | 3     |
| Condylura cristata                          | GCF_000260355.1 | 3     |
| Coturnix japonica                           | GCF_001577835.1 | 3     |
| Crocodylus porosus                          | GCF_001723895.1 | 3     |
| Cuculus canorus                             | GCF_000709325.1 | 3     |
| Delphinapterus leucas                       | GCF_002288925.2 | 3     |
| Egretta garzetta                            | GCF_000687185.1 | 3     |
| Enhydra lutris kenyoni                      | GCF_002288905.1 | 3     |
| Eptesicus fuscus                            | GCF_000308155.1 | 3     |
| Equus asinus                                | GCF_001305755.1 | 3     |
| Equus caballus                              | GCF_002863925.1 | 3     |
| Felis catus                                 | GCF_000181335.3 | 3     |
| Fukomys damarensis                          | GCF_000743615.1 | 3     |
| Galeopterus variegatus                      | GCF_000696425.1 | 3     |
| Gallus gallus                               | GCF_000002315.5 | 3     |
| Macaca fascicularis                         | GCA_000230815.1 | 3     |
| Meleagris gallopavo                         | GCF_000146605.2 | 3     |
| Neomonachus schauinslandi                   | GCF_002201575.1 | 3     |
| Neophocaena asiaeorientalis asiaeorientalis | GCF_003031525.1 | 3     |
| Notechis scutatus                           | GCF_900518725.1 | 3     |
| Numida meleagris                            | GCF_002078875.1 | 3     |
| Oryctolagus cuniculus                       | GCF_000003625.3 | 3     |
| Pan paniscus                                | GCF_000258655.2 | 3     |
| Papio anubis                                | GCF_000264685.3 | 3     |
| Phaethon lepturus                           | GCF_000687285.1 | 3     |
| Ptilocolobus tephrosceles                   | GCF_002776525.2 | 3     |
| Pongo abelii                                | GCA_002880775.3 | 3     |

| GCA                          | taxonomy        | count |
|------------------------------|-----------------|-------|
| Propithecus coquereli        | GCF_000956105.1 | 3     |
| Pseudonaja textilis          | GCF_900518735.1 | 3     |
| Pteropus vampyrus            | GCF_000151845.1 | 3     |
| Sarcophilus harrisii         | GCF_000189315.1 | 3     |
| Struthio camelus australis   | GCA_000698965.1 | 3     |
| Struthio camelus australis   | GCF_000698965.1 | 3     |
| Sturnus vulgaris             | GCF_001447265.1 | 3     |
| Xenopus laevis               | GCA_001663975.1 | 3     |
| Acanthisitta chloris         | GCF_000695815.1 | 3     |
| Antrostomus carolinensis     | GCF_000700745.1 | 3     |
| Bambusicola thoracicus       | GCA_002909625.1 | 3     |
| Bison bison bison            | GCF_000754665.1 | 3     |
| Colius striatus              | GCF_000690715.1 | 3     |
| Colobus angolensis palliatus | GCF_000951035.1 | 3     |
| Corvus brachyrhynchos        | GCA_000691975.1 | 3     |
| Corvus brachyrhynchos        | GCF_000691975.1 | 3     |
| Cyanistes caeruleus          | GCF_002901205.1 | 3     |
| Ficedula albicollis          | GCF_000247815.1 | 3     |
| Lepidothrix coronata         | GCF_001604755.1 | 3     |
| Parus major                  | GCF_001522545.3 | 3     |
| Picoides pubescens           | GCF_000699005.1 | 3     |
| Tinamus guttatus             | GCF_000705375.1 | 3     |
| Anabas testudineus           | GCF_900324465.1 | 3     |
| Astyanax mexicanus           | GCF_000372685.2 | 3     |
| Electrophorus electricus     | GCF_003665695.1 | 3     |
| Haplochromis burtoni         | GCF_000239415.1 | 3     |
| Labrus bergylta              | GCF_900080235.1 | 3     |
| Larimichthys crocea          | GCF_000972845.2 | 3     |
| Mastacembelus armatus        | GCF_900324485.1 | 3     |
| Pangasianodon hypophthalmus  | GCF_003671635.1 | 3     |
| Poecilia latipinna           | GCF_001443285.1 | 3     |
| Scleropages formosus         | GCA_001005745.2 | 3     |
| Tetraodon nigroviridis       | GCA_000180735.1 | 3     |
| Biomphalaria glabrata        | GCF_000457365.1 | 3     |

| GCA                       | taxonomy        | count |
|---------------------------|-----------------|-------|
| Macrostomum lignano       | GCA_002269645.1 | 2     |
| Centruroides sculpturatus | GCF_000671375.1 | 2     |
| Parasteatoda tepidariorum | GCF_000365465.2 | 2     |
| Ciona intestinalis        | GCF_000224145.3 | 2     |
| Acinonyx jubatus          | GCF_003709585.1 | 2     |
| Aptenodytes forsteri      | GCA_000699145.1 | 2     |
| Chaetura pelagica         | GCA_000747805.1 | 2     |
| Colinus virginianus       | GCA_000599465.2 | 2     |
| Cricetulus griseus        | GCA_000448345.1 | 2     |
| Cuculus canorus           | GCA_000709325.1 | 2     |
| Egretta garzetta          | GCA_000687185.1 | 2     |
| Falco peregrinus          | GCF_000337955.1 | 2     |
| Gorilla gorilla gorilla   | GCF_008122165.1 | 2     |
| Haliaeetus leucocephalus  | GCF_000737465.1 | 2     |
| Macaca mulatta            | GCA_000230795.1 | 2     |
| Macaca mulatta            | GCF_003339765.1 | 2     |
| Mandrillus leucophaeus    | GCF_000951045.1 | 2     |
| Melopsittacus undulatus   | GCF_000238935.1 | 2     |
| Nothoprocta perdicaria    | GCF_003342845.1 | 2     |
| Pan troglodytes           | GCA_002880755.3 | 2     |
| Physeter catodon          | GCF_002837175.2 | 2     |
| Puma concolor             | GCF_003327715.1 | 2     |
| Rhinopithecus roxellana   | GCF_007565055.1 | 2     |
| Tupaia chinensis          | GCA_000334495.1 | 2     |
| Vicugna pacos             | GCF_000164845.2 | 2     |
| Vulpes vulpes             | GCF_003160815.1 | 2     |
| Zonotrichia albicollis    | GCF_000385455.1 | 2     |
| Acanthisitta chloris      | GCA_000695815.1 | 2     |
| Apteryx rowi              | GCF_003343035.1 | 2     |
| Phalacrocorax carbo       | GCF_000708925.1 | 2     |
| Rana catesbeiana          | GCA_002284835.2 | 2     |
| Xenopus tropicalis        | GCA_000004195.3 | 2     |
| Anas platyrhynchos        | GCA_000355885.1 | 2     |
| Anas platyrhynchos        | GCF_003850225.1 | 2     |

| GCA                             | taxonomy        | count |
|---------------------------------|-----------------|-------|
| Anser cygnoides domesticus      | GCF_000971095.1 | 2     |
| Antrostomus carolinensis        | GCA_000700745.1 | 2     |
| Apaloderma vittatum             | GCA_000703405.1 | 2     |
| Apaloderma vittatum             | GCF_000703405.1 | 2     |
| Aquila chrysaetos canadensis    | GCF_000766835.1 | 2     |
| Balearica regulorum gibbericeps | GCA_000709895.1 | 2     |
| Balearica regulorum gibbericeps | GCF_000709895.1 | 2     |
| Buceros rhinoceros silvestris   | GCA_000710305.1 | 2     |
| Buceros rhinoceros silvestris   | GCF_000710305.1 | 2     |
| Camelus bactrianus              | GCF_000767855.1 | 2     |
| Cathartes aura                  | GCA_000699945.1 | 2     |
| Chlamydotis macqueenii          | GCA_000695195.1 | 2     |
| Chlorocebus sabaeus             | GCF_000409795.2 | 2     |
| Colius striatus                 | GCA_000690715.1 | 2     |
| Cricetulus griseus              | GCF_000223135.1 | 2     |
| Equus przewalskii               | GCF_000696695.1 | 2     |
| Eurypyga helias                 | GCA_000690775.1 | 2     |
| Fulmarus glacialis              | GCA_000690835.1 | 2     |
| Gavia stellata                  | GCA_000690875.1 | 2     |
| Gavialis gangeticus             | GCF_001723915.1 | 2     |
| Haliaeetus albicilla            | GCF_000691405.1 | 2     |
| Leptosomus discolor             | GCA_000691785.1 | 2     |
| Lonchura striata domestica      | GCA_002197715.1 | 2     |
| Macaca fascicularis             | GCF_000364345.1 | 2     |
| Merops nubicus                  | GCA_000691845.1 | 2     |
| Merops nubicus                  | GCF_000691845.1 | 2     |
| Mesitornis unicolor             | GCA_000695765.1 | 2     |
| Microcebus murinus              | GCF_000165445.2 | 2     |
| Mus pahari                      | GCF_900095145.1 | 2     |
| Myotis davidii                  | GCA_000327345.1 | 2     |
| Nestor notabilis                | GCF_000696875.1 | 2     |
| Nipponia nippon                 | GCA_000708225.1 | 2     |
| Nomascus leucogenys             | GCF_006542625.1 | 2     |
| Opisthocomus hoazin             | GCF_000692075.1 | 2     |

| GCA | taxonomy                        | count           |   |
|-----|---------------------------------|-----------------|---|
|     | Pelecanus crispus               | GCA_000687375.1 | 2 |
|     | Phaethon lepturus               | GCA_000687285.1 | 2 |
|     | Phalacrocorax carbo             | GCA_000708925.1 | 2 |
|     | Phoenicopterus ruber ruber      | GCA_000687265.1 | 2 |
|     | Podiceps cristatus              | GCA_000699545.1 | 2 |
|     | Pterocles gutturalis            | GCA_000699245.1 | 2 |
|     | Pterocles gutturalis            | GCF_000699245.1 | 2 |
|     | Pygoscelis adeliae              | GCF_000699105.1 | 2 |
|     | Rattus norvegicus               | GCF_000001895.5 | 2 |
|     | Rhinopithecus bieti             | GCF_001698545.1 | 2 |
|     | Saimiri boliviensis boliviensis | GCF_000235385.1 | 2 |
|     | Tauraco erythrolophus           | GCA_000709365.1 | 2 |
|     | Tauraco erythrolophus           | GCF_000709365.1 | 2 |
|     | Tursiops truncatus              | GCF_001922835.1 | 2 |
|     | Tyto alba                       | GCA_000687205.1 | 2 |
|     | Astatotilapia calliptera        | GCF_900246225.1 | 2 |
|     | Poecilia mexicana               | GCF_001443325.1 | 2 |
|     | Scleropages formosus            | GCF_900964775.1 | 2 |
|     | Takifugu rubripes               | GCF_901000725.2 | 2 |
|     | Drosophila serrata              | GCF_002093755.1 | 2 |
|     | Mizuhopecten yessoensis         | GCA_002113885.2 | 2 |
|     | Pomacea canaliculata            | GCA_003073045.1 | 2 |
|     | Clonorchis sinensis             | GCA_003604175.1 | 1 |
|     | Echinococcus granulosus         | GCF_000524195.1 | 1 |
|     | Echinococcus multilocularis     | GCA_000469725.3 | 1 |
|     | Hymenolepis microstoma          | GCA_000469805.2 | 1 |
|     | Opisthorchis viverrini          | GCF_000715545.1 | 1 |
|     | Schistosoma mansoni             | GCF_000237925.1 | 1 |
|     | Stegodyphus mimosarum           | GCA_000611955.2 | 1 |
|     | Nephila clavipes                | GCA_002102615.1 | 1 |
|     | Euroglyphus maynei              | GCA_002135145.1 | 1 |
|     | Galendromus occidentalis        | GCF_000255335.1 | 1 |
|     | Priapulus caudatus              | GCF_000485595.1 | 1 |
|     | Sarcoptes scabiei               | GCA_000828355.1 | 1 |

| GCA                          | taxonomy        | count |
|------------------------------|-----------------|-------|
| Tetranychus urticae          | GCF_000239435.1 | 1     |
| Varroa destructor            | GCF_002443255.1 | 1     |
| Varroa jacobsoni             | GCF_002532875.1 | 1     |
| Helobdella robusta           | GCF_000326865.1 | 1     |
| Canis lupus dingo            | GCF_003254725.1 | 1     |
| Chelonia mydas               | GCF_000344595.1 | 1     |
| Columba livia                | GCA_000337935.2 | 1     |
| Lonchura striata domestica   | GCF_005870125.1 | 1     |
| Mus musculus                 | GCA_000002165.1 | 1     |
| Cricetulus griseus           | GCA_003668045.1 | 1     |
| Ailuropoda melanoleuca       | GCA_000004335.1 | 1     |
| Falco cherrug                | GCF_000337975.1 | 1     |
| Fukomys damarensis           | GCA_000743615.1 | 1     |
| Limosa lapponica baueri      | GCA_002844005.1 | 1     |
| Macaca nemestrina            | GCF_000956065.1 | 1     |
| Myotis brandtii              | GCA_000412655.1 | 1     |
| Pan troglodytes              | GCF_002880755.1 | 1     |
| Patagioenas fasciata monilis | GCA_002029285.1 | 1     |
| Pteropus alecto              | GCA_000325575.1 | 1     |
| Vicugna pacos                | GCF_000164845.1 | 1     |
| Ophiophagus hannah           | GCA_000516915.1 | 1     |
| Gulo gulo                    | GCA_900006375.2 | 1     |
| Athene cunicularia           | GCF_003259725.1 | 1     |
| Calypte anna                 | GCA_000699085.1 | 1     |
| Chlamydotis macqueenii       | GCF_000695195.1 | 1     |
| Corvus cornix cornix         | GCF_000738735.2 | 1     |
| Cricetulus griseus           | GCA_000223135.1 | 1     |
| Dromaius novaehollandiae     | GCF_003342905.1 | 1     |
| Erythrura gouldiae           | GCA_003676055.1 | 1     |
| Eurypyga helias              | GCF_000690775.1 | 1     |
| Fulmarus glacialis           | GCF_000690835.1 | 1     |
| Gavia stellata               | GCF_000690875.1 | 1     |
| Geospiza fortis              | GCF_000277835.1 | 1     |
| Haliaeetus albicilla         | GCA_000691405.1 | 1     |

| GCA                           | taxonomy        | count |
|-------------------------------|-----------------|-------|
| Leptosomus discolor           | GCF_000691785.1 | 1     |
| Manacus vitellinus            | GCA_000692015.2 | 1     |
| Manacus vitellinus            | GCF_001715985.3 | 1     |
| Mesitornis unicolor           | GCF_000695765.1 | 1     |
| Nestor notabilis              | GCA_000696875.1 | 1     |
| Opisthocomus hoazin           | GCA_000692075.1 | 1     |
| Pelecanus crispus             | GCF_000687375.1 | 1     |
| Picoides pubescens            | GCA_000699005.1 | 1     |
| Pygoscelis adeliae            | GCA_000699105.1 | 1     |
| Serinus canaria               | GCF_007115625.1 | 1     |
| Terrapene mexicana triunguis  | GCF_002925995.2 | 1     |
| Tinamus guttatus              | GCA_000705375.2 | 1     |
| Tyto alba                     | GCF_000687205.1 | 1     |
| Urocitellus parryii           | GCF_003426925.1 | 1     |
| Ursus arctos horribilis       | GCF_003584765.1 | 1     |
| Anabarilius grahami           | GCA_003731715.1 | 1     |
| Tachysurus fulvidraco         | GCF_003724035.1 | 1     |
| Nematostella vectensis        | GCA_000209225.1 | 1     |
| Daphnia magna                 | GCA_001632505.1 | 1     |
| Eurytemora affinis            | GCF_000591075.1 | 1     |
| Hyalella azteca               | GCF_000764305.1 | 1     |
| Strongylocentrotus purpuratus | GCF_000002235.5 | 1     |
| Acromyrmex echinatio          | GCF_000204515.1 | 1     |
| Acyrtosiphon pisum            | GCF_005508785.1 | 1     |
| Aedes aegypti                 | GCA_000004015.3 | 1     |
| Aedes aegypti                 | GCF_002204515.2 | 1     |
| Aedes albopictus              | GCA_001444175.2 | 1     |
| Amyelois transitella          | GCF_001186105.1 | 1     |
| Anopheles darlingi            | GCA_000211455.3 | 1     |
| Anopheles gambiae str. PEST   | GCF_000005575.2 | 1     |
| Anopheles sinensis            | GCA_000441895.2 | 1     |
| Anoplophora glabripennis      | GCF_000390285.2 | 1     |
| Apis cerana                   | GCF_001442555.1 | 1     |
| Apis cerana cerana            | GCA_002290385.1 | 1     |

| GCA                         | taxonomy        | count |
|-----------------------------|-----------------|-------|
| Apis mellifera              | GCF_003254395.2 | 1     |
| Athalia rosae               | GCF_000344095.2 | 1     |
| Atta cephalotes             | GCF_000143395.1 | 1     |
| Atta colombica              | GCA_001594045.1 | 1     |
| Atta colombica              | GCF_001594045.1 | 1     |
| Bactrocera latifrons        | GCF_001853355.1 | 1     |
| Bactrocera oleae            | GCF_001188975.1 | 1     |
| Bemisia tabaci              | GCF_001854935.1 | 1     |
| Bicyclus anynana            | GCF_900239965.1 | 1     |
| Blattella germanica         | GCA_003018175.1 | 1     |
| Bombus impatiens            | GCF_000188095.3 | 1     |
| Bombus terrestris           | GCF_000214255.1 | 1     |
| Bombyx mori                 | GCF_000151625.1 | 1     |
| Camponotus floridanus       | GCA_000147175.1 | 1     |
| Camponotus floridanus       | GCF_003227725.1 | 1     |
| Cephus cinctus              | GCF_000341935.1 | 1     |
| Ceratina calcarata          | GCF_001652005.1 | 1     |
| Ceratitis capitata          | GCF_000347755.3 | 1     |
| Ceratosolen solmsi marchali | GCF_000503995.1 | 1     |
| Cimex lectularius           | GCF_000648675.2 | 1     |
| Clunio marinus              | GCA_900005825.1 | 1     |
| Copidosoma floridanum       | GCF_000648655.2 | 1     |
| Cryptotermes secundus       | GCF_002891405.2 | 1     |
| Culex quinquefasciatus      | GCF_000209185.1 | 1     |
| Cyphomyrmex costatus        | GCA_001594065.1 | 1     |
| Cyphomyrmex costatus        | GCF_001594065.1 | 1     |
| Danaus plexippus plexippus  | GCA_000235995.2 | 1     |
| Dendroctonus ponderosae     | GCF_000355655.1 | 1     |
| Diachasma alloeum           | GCF_001412515.2 | 1     |
| Diaphorina citri            | GCF_000475195.1 | 1     |
| Dinoponera quadriceps       | GCF_001313825.1 | 1     |
| Diuraphis noxia             | GCF_001186385.1 | 1     |
| Drosophila ananassae        | GCF_000005115.1 | 1     |
| Drosophila arizonae         | GCF_001654025.1 | 1     |

| GCA                                    | taxonomy        | count |
|----------------------------------------|-----------------|-------|
| Drosophila biarmipes                   | GCF_000233415.1 | 1     |
| Drosophila bipectinata                 | GCF_000236285.1 | 1     |
| Drosophila busckii                     | GCA_001277935.1 | 1     |
| Drosophila busckii                     | GCF_001277935.1 | 1     |
| Drosophila elegans                     | GCF_000224195.1 | 1     |
| Drosophila eugracilis                  | GCF_000236325.1 | 1     |
| Drosophila ficusphila                  | GCF_000220665.1 | 1     |
| Drosophila grimshawi                   | GCF_000005155.2 | 1     |
| Drosophila kikkawai                    | GCF_000224215.1 | 1     |
| Drosophila miranda                     | GCF_000269505.1 | 1     |
| Drosophila mojavensis                  | GCF_000005175.2 | 1     |
| Drosophila obscura                     | GCF_002217835.1 | 1     |
| Drosophila pseudoobscura pseudoobscura | GCF_000001765.3 | 1     |
| Drosophila rhopaloa                    | GCF_000236305.1 | 1     |
| Drosophila sechellia                   | GCF_000005215.3 | 1     |
| Drosophila suzukii                     | GCF_000472105.1 | 1     |
| Drosophila takahashii                  | GCF_000224235.1 | 1     |
| Drosophila virilis                     | GCF_000005245.1 | 1     |
| Drosophila willistoni                  | GCA_000005925.1 | 1     |
| Drosophila willistoni                  | GCF_000005925.1 | 1     |
| Drosophila yakuba                      | GCF_000005975.2 | 1     |
| Dufourea novaeangliae                  | GCA_001272555.1 | 1     |
| Dufourea novaeangliae                  | GCF_001272555.1 | 1     |
| Eufriesea mexicana                     | GCA_001483705.1 | 1     |
| Eufriesea mexicana                     | GCF_001483705.1 | 1     |
| Folsomia candida                       | GCA_002217175.1 | 1     |
| Folsomia candida                       | GCF_002217175.1 | 1     |
| Fopius arisanus                        | GCF_000806365.1 | 1     |
| Habropoda laboriosa                    | GCF_001263275.1 | 1     |
| Halyomorpha halys                      | GCF_000696795.2 | 1     |
| Harpegnathos saltator                  | GCA_000147195.1 | 1     |
| Harpegnathos saltator                  | GCF_003227715.1 | 1     |
| Helicoverpa armigera                   | GCA_002156985.1 | 1     |
| Helicoverpa armigera                   | GCF_002156985.1 | 1     |

| GCA                               | taxonomy        | count |
|-----------------------------------|-----------------|-------|
|                                   | GCA_002382865.1 | 1     |
| <i>Heliothis virescens</i>        | GCA_002382865.1 | 1     |
| <i>Leptinotarsa decemlineata</i>  | GCF_000500325.1 | 1     |
| <i>Linepithema humile</i>         | GCF_000217595.1 | 1     |
| <i>Lucilia cuprina</i>            | GCA_001187945.1 | 1     |
| <i>Lucilia cuprina</i>            | GCF_000699065.1 | 1     |
| <i>Megachile rotundata</i>        | GCF_000220905.1 | 1     |
| <i>Melanaphis sacchari</i>        | GCF_002803265.2 | 1     |
| <i>Melipona quadrifasciata</i>    | GCA_001276565.1 | 1     |
| <i>Microplitis demolitor</i>      | GCF_000572035.2 | 1     |
| <i>Monomorium pharaonis</i>       | GCF_003260585.2 | 1     |
| <i>Musca domestica</i>            | GCF_000371365.1 | 1     |
| <i>Myzus persicae</i>             | GCF_001856785.1 | 1     |
| <i>Nasonia vitripennis</i>        | GCF_000002325.3 | 1     |
| <i>Neodiprion lecontei</i>        | GCF_001263575.1 | 1     |
| <i>Nicrophorus vespilloides</i>   | GCF_001412225.1 | 1     |
| <i>Nilaparvata lugens</i>         | GCF_000757685.1 | 1     |
| <i>Onthophagus taurus</i>         | GCF_000648695.1 | 1     |
| <i>Operophtera brumata</i>        | GCA_001266575.1 | 1     |
| <i>Orussus abietinus</i>          | GCF_000612105.2 | 1     |
| <i>Oryctes borbonicus</i>         | GCA_001443705.1 | 1     |
| <i>Papilio machaon</i>            | GCA_001298355.1 | 1     |
| <i>Papilio machaon</i>            | GCF_001298355.1 | 1     |
| <i>Papilio polytes</i>            | GCF_000836215.1 | 1     |
| <i>Papilio xuthus</i>             | GCA_001298345.1 | 1     |
| <i>Papilio xuthus</i>             | GCF_000836235.1 | 1     |
| <i>Pediculus humanus corporis</i> | GCF_000006295.1 | 1     |
| <i>Pieris rapae</i>               | GCF_001856805.1 | 1     |
| <i>Plutella xylostella</i>        | GCF_000330985.1 | 1     |
| <i>Pogonomyrmex barbatus</i>      | GCF_000187915.1 | 1     |
| <i>Polistes canadensis</i>        | GCF_001313835.1 | 1     |
| <i>Polistes dominula</i>          | GCF_001465965.1 | 1     |
| <i>Pseudomyrmex gracilis</i>      | GCF_002006095.1 | 1     |
| <i>Rhagoletis zephyria</i>        | GCF_001687245.1 | 1     |
| <i>Sipha flava</i>                | GCF_003268045.1 | 1     |

| GCA                          | taxonomy        | count |
|------------------------------|-----------------|-------|
| Spodoptera litura            | GCF_002706865.1 | 1     |
| Stomoxys calcitrans          | GCF_001015335.1 | 1     |
| Temnothorax curvispinosus    | GCF_003070985.1 | 1     |
| Trachymyrmex cornetzi        | GCF_001594075.1 | 1     |
| Trachymyrmex septentrionalis | GCA_001594115.1 | 1     |
| Trachymyrmex septentrionalis | GCF_001594115.1 | 1     |
| Trachymyrmex zeteki          | GCA_001594055.1 | 1     |
| Trachymyrmex zeteki          | GCF_001594055.1 | 1     |
| Tribolium castaneum          | GCF_000002335.3 | 1     |
| Trichogramma pretiosum       | GCF_000599845.2 | 1     |
| Trichomalopsis sarcophagae   | GCA_002249905.1 | 1     |
| Vollenhovia emeryi           | GCF_000949405.1 | 1     |
| Wasmannia auropunctata       | GCF_000956235.1 | 1     |
| Zeugodacus cucurbitae        | GCF_000806345.1 | 1     |
| Zootermopsis nevadensis      | GCF_000696155.1 | 1     |
| Acromyrmex echinator         | GCA_000204515.1 | 1     |
| Apis florea                  | GCF_000184785.2 | 1     |
| Habropoda laboriosa          | GCA_001263275.1 | 1     |
| Ooceraea biroi               | GCA_000611835.1 | 1     |
| Trachymyrmex cornetzi        | GCA_001594075.1 | 1     |
| Octopus bimaculoides         | GCA_001194135.1 | 1     |
| Toxocara canis               | GCA_000803305.1 | 1     |
| Trichinella britovi          | GCA_001447585.1 | 1     |
| Trichinella murrelli         | GCA_001447425.1 | 1     |
| Trichinella nativa           | GCA_001447565.1 | 1     |
| Trichinella nelsoni          | GCA_001447455.1 | 1     |
| Trichinella papuae           | GCA_001447755.1 | 1     |
| Trichinella patagoniensis    | GCA_001447655.1 | 1     |
| Trichinella pseudospiralis   | GCA_001447445.1 | 1     |
| Trichinella pseudospiralis   | GCA_001447675.1 | 1     |
| Trichinella pseudospiralis   | GCA_001447575.1 | 1     |
| Trichinella pseudospiralis   | GCA_001447725.1 | 1     |
| Trichinella sp. T6           | GCA_001447435.1 | 1     |
| Trichinella sp. T8           | GCA_001447745.1 | 1     |

| GCA                      | taxonomy        | count |
|--------------------------|-----------------|-------|
| Trichinella sp. T9       | GCA_001447505.1 | 1     |
| Trichinella spiralis     | GCA_001447595.1 | 1     |
| Trichinella spiralis     | GCF_000181795.1 | 1     |
| Trichinella zimbabwensis | GCA_001447665.1 | 1     |
| Trichuris suis           | GCA_000701005.1 | 1     |
| Trichuris suis           | GCA_000701025.1 | 1     |
| Trichoplax adhaerens     | GCA_000150275.1 | 1     |
| Trichoplax adhaerens     | GCF_000150275.1 | 1     |
