# Supplementary material for: Bacterial death and TRADD-N domains help define novel apoptosis and immunity mechanisms shared by prokaryotes and metazoans
Source: PubMed Central journal article supplement (PMC8195603; doi:10.7554/elife.70394), 2021-06-01
Supplement: elife-70394-fig6-data1.pdf [file elife-70394-fig6-data1.pdf]

## Supplementary Material

### **Bacterial Death and TRADD-N domains help define novel apoptosis and immunity mechanisms shared by prokaryotes and metazoans**

Gurmeet Kaur†, Lakshminarayan M. Iyer†, A. Maxwell Burroughs, L. Aravind\*

Computational Biology Branch, National Center for Biotechnology Information, National Library of Medicine, National Institutes of Health, Bethesda, MD 20894, USA

†These authors contributed equally to the manuscript

#### **Abstract**

Several homologous domains are shared by eukaryotic immunity and programmed cell-death systems and poorly understood bacterial proteins. Recent studies show these to be components of a network of highly regulated systems connecting apoptotic processes to counter-invader immunity, in prokaryotes with a multicellular habit. However, the provenance of key adaptor domains, namely those of the Death-like and TRADD-N superfamilies, a quintessential feature of metazoan apoptotic systems, remained murky. Here, we use sensitive sequence analysis and comparative genomics methods to identify unambiguous bacterial homologs of the Death-like and TRADD-N superfamilies. We show the former to have arisen as part of a radiation of effector-associated  $\alpha$ -helical adaptor domains that likely mediate homotypic interactions bringing together diverse effector and signaling domains in predicted bacterial apoptosis- and counter-invader systems. Similarly, we show that the TRADD-N domain defines a key, widespread signaling bridge that links effector deployment to invader-sensing in multicellular bacterial and metazoan counter-invader systems. TRADD-N domains are expanded in aggregating marine invertebrates and point to distinctive diversifying immune strategies probably directed both at RNA and retro- viruses and cellular pathogens that might infect such communities. These TRADD-N and Death-like domains helped identify several new bacterial and metazoan counter-invader systems featuring under-appreciated, common functional principles: the use of intracellular invader-sensing lectin-like (NPCBM and FGS), transcription elongation GreA/B-C, glycosyltransferase-4 family, inactive NTPase (serving as nucleic-acid-receptors) and invader-sensing GTPase switch domains. Finally, these findings point to the possibility of multicellular bacteria-stem metazoan symbiosis in the emergence of the immune/apoptotic systems of the latter.

## Supplementary Material

### **Bacterial Death and TRADD-N domains help define novel apoptosis and immunity mechanisms shared by prokaryotes and metazoans**

#### **Figure 6-Source data 1**

Gurmeet Kaur†, Lakshminarayan M. Iyer†, A. Maxwell Burroughs, L. Aravind\*

Computational Biology Branch, National Center for Biotechnology Information, National Library of Medicine, National Institutes of Health, Bethesda, MD 20894, USA

†These authors contributed equally to the manuscript

## **Index.**

1. Source data. Gene neighborhoods and domain architectures of the bacterial GT4-like glycosyltransferases described in this study
2. Source data. Domain architectures of eukaryotic GT4s with a special emphasis on the LSE in *Acropora*.
3. Source data. Gene neighborhoods and domain architectures of the MNS-like STAND domains (nSTAND2) that is present in a 2-gene operon system each containing a STAND NTPase
4. Source data. Gene neighborhoods and domain architectures of prokaryotic AP-GTPases described in this study

Source data. Gene neighborhoods and domain architectures of the bacterial GT4-like glycosyltransferases described in this study

| acc        | operon                                                                                 | architecture                | len  | gen.name         | taxend                   | species                            | define                                                                                      | gca             |
|------------|----------------------------------------------------------------------------------------|-----------------------------|------|------------------|--------------------------|------------------------------------|---------------------------------------------------------------------------------------------|-----------------|
| ADU34882.1 | GT4+B12-binding+RADICAL-SAM*→                                                          | GT4+B12-binding+RADICAL-SAM | 1405 | Varpa_0662       | Betapro-<br>teobacteria  | Variovorax<br>paradoxus EPS        | Radical SAM<br>domain protein<br>[Variovorax<br>paradoxus EPS]                              | GCA_000184745.1 |
| AEV82483.1 | WXG+GT4+GT4+REase*→                                                                    | WXG+GT4+GT4+REase           | 4143 | inaW             | Actinobacte-<br>ria      | Actinoplanes sp.<br>SE50/110       | Ice nucleation<br>protein<br>[Actinoplanes sp.<br>SE50/110]                                 | GCA_000237145.1 |
| AMB84622.1 | APATPase+GT4*→                                                                         | APATPase+GT4                | 1299 | AWM79_04595      | Gammapro-<br>teobacteria | Pseudomonas<br>agarici             | hypothetical<br>protein<br>AWM79_04595<br>[Pseudomonas<br>agarici]                          | GCA_001543125.1 |
| ANP51773.1 | Caspase+NACHT+GT4*→    <-?<-?<-?  ?→?→    <-?<-MFS                                     | Caspase+NACHT+GT4           | 1134 | AVL59_21225      | Actinobacte-<br>ria      | Streptomyces<br>griseochromogenes  | hypothetical<br>protein<br>AVL59_21225<br>[Streptomyces<br>griseochromo-<br>genes]          | GCA_001542625.2 |
| AWZ06155.1 | Caspase+NACHT+GT4*→    <-?<-?<-?<-?  APATPase→                                         | Caspase+NACHT+GT4           | 1156 | DRB89_17720      | Actinobacte-<br>ria      | Streptomyces sp.<br>ICC4           | hypothetical<br>protein<br>DRB89_17720<br>[Streptomyces sp.<br>ICC4]                        | GCA_003287915.1 |
| BAO61700.1 | SWACOS+GT4*→?→?→    <-?<-?  MFS→                                                       | SWACOS+GT4                  | 1084 | PPC_2353         | Gammapro-<br>teobacteria | Pseudomonas<br>protegens Cab57     | hypothetical<br>protein<br>PPC_2353<br>[Pseudomonas<br>protegens Cab57]                     | GCA_000828695.1 |
| CEL20906.1 | ART+Caspase+GT4*→?→ GT4→                                                               | ART+Caspase+GT4             | 1145 | BN1199_RS39095   | Actinobacte-<br>ria      | Kibdelosporangium sp.<br>MJ126-NF4 | hypothetical<br>protein [Kibde-<br>losporangium sp.<br>MJ126-NF4]                           | GCA_000826545.1 |
| CUU59694.1 | TPR+Caspase→ TPR+Caspase→    <-CATASP  CATRA-N+CATRA-C+GT4*→    <-?  HTH+APATPase+TPR→ | CATRA-N+CATRA-C+GT4         | 904  | Ga0074812_13074  | Actinobacte-<br>ria      | Frankia irregularis                | Glycosyltrans-<br>ferase involved in<br>cell wall<br>bisyntesis<br>[Frankia<br>irregularis] | GCA_001536285.1 |
| EIV94947.1 | CATRA-N+CATRA-C+GT4*→    <-TPR+Caspase<-?<-?<-?<-?  APATPase+TPR→ CATASP→              | CATRA-N+CATRA-C+GT4         | 810  | FraQA3DRAFT_4713 | Actinobacte-<br>ria      | Frankia sp. QA3                    | glycosyltrans-<br>ferase [Frankia sp.<br>QA3]                                               | GCA_000262465.1 |

| acc        | operon                                                                       | architecture                  | len  | gen.name        | taxend                | species                                | define                                                                  | gca             |
|------------|------------------------------------------------------------------------------|-------------------------------|------|-----------------|-----------------------|----------------------------------------|-------------------------------------------------------------------------|-----------------|
| EKX63918.1 | ZetaToxin+GT4+NUDIX+ART+NTase*→?→?→?→   <-Caspase<-?  ?→?→?→   <-NLPC        | ZetaToxin+GT4+NUDIX+ART+NTase | 2156 | STRIP9103_04937 | Actinobacteria        | Streptomyces ipomoeae 91-03            | hydrolase, NUDIX family [Streptomyces ipomoeae 91-03]                   | GCA_000317595.1 |
| EWM12074.1 | <-CATASP  CATRA-N+CATRA-C+GT4*→   <-HTH+APATPase+TPR                         | CATRA-N+CATRA-C+GT4           | 750  | KUTG_02378      | Actinobacteria        | Kutzneria sp. 744                      | LigA protein [Kutzneria sp. 744]                                        | GCA_000568255.1 |
| GBE24927.1 | Asparaginase_II→ Acetyltransf_6→ GT4*→?→?→?→   <-?<-SIG+TM+TM+TM<-THUMP+ThiI | GT4                           | 407  | mshA            | unclassified Bacteria | bacterium BMS3Bbin02                   | D-inositol 3-phosphate glycosyltransferase [bacterium BMS3Bbin02]       | GCA_002898115.1 |
| HBN24878.1 | GT4*→                                                                        | GT4                           | 721  | DD447_07855     | Firmicutes            | Lachnospiraceae bacterium              | TPA: hypothetical protein DD447_07855 [Lachnospiraceae bacterium]       | GCA_003503295.1 |
| HCI14011.1 | GT4+APATPase+TPR*→                                                           | GT4+APATPase+TPR              | 1340 | DFK12_08625     | Betaproteobacteria    | Gallionellaceae bacterium              | TPA: hypothetical protein DFK12_08625 [Gallionellaceae bacterium]       | GCA_003521785.1 |
| HCS09332.1 | <-MODE-HTH+PBPI  ?→   <-?<-PSE<-PrpF  ?→ PSE→ STAND+TPR+GT4*→                | STAND+TPR+GT4                 | 1081 | DIW67_19725     | Gammaproteobacteria   | Pseudomonas sp.                        | TPA: glycosyltransferase [Pseudomonas sp.]                              | GCA_003531165.1 |
| HDL41796.1 | GT4*→                                                                        | GT4                           | 345  | ENG98_02120     | Actinobacteria        | Actinobacteria bacterium               | TPA: glycosyltransferase, partial [Actinobacteria bacterium]            | GCA_011041235.1 |
| KDN80799.1 | MNS+GT4*→   <-?  ?→ ABC_tran→                                                | MNS+GT4                       | 1137 | KCH_74340       | Actinobacteria        | Kitasatospora cheerisanensis KCTC 2395 | hypothetical protein KCH_74340 [Kitasatospora cheerisanensis KCTC 2395] | GCA_000696185.1 |
| KNY05162.1 | GT4*→                                                                        | GT4                           | 533  | AKH00_12305     | Actinobacteria        | Microbacterium sp. GCS4                | hypothetical protein AKH00_12305 [Microbacterium sp. GCS4]              | GCA_001262495.1 |
| KOX13006.1 | <-ABC_tran  ?→?→?→   <-?<-TIR+NACHT  HTH+APATPase+TPR+GT4*→                  | HTH+APATPase+TPR+GT4          | 1158 | ADK67_45665     | Actinobacteria        | Saccharothrix sp. NRRL B-16348         | NTPase [Saccharothrix sp. NRRL B-16348]                                 | GCA_001280085.1 |
| KQM59620.1 | GT4*→   <-TRPR-HTH+PBPI<-?<-?<-?<-?  PSE→?→ PfkB→                            | GT4                           | 155  | ASE64_09860     | Actinobacteria        | Agreia sp. Leaf210                     | hypothetical protein ASE64_09860 [Agreia sp. Leaf210]                   | GCA_001421485.1 |

| acc          | operon                                                                                   | architecture                     | len  | gen.name    | taxend              | species                    | define                                                     | gca             |
|--------------|------------------------------------------------------------------------------------------|----------------------------------|------|-------------|---------------------|----------------------------|------------------------------------------------------------|-----------------|
| KQW27056.1   | STAND+GT4*→                                                                              | STAND+GT4                        | 1005 | ASC85_27055 | Gammaproteobacteria | Pseudomonas sp. Root401    | hypothetical protein ASC85_27055 [Pseudomonas sp. Root401] | GCA_001425105.1 |
| KVF32402.1   | <-SIG+RCDG1+YidC_periplas+60KD_IMP<-?<-?  ?→?→?→ GT4+B12-binding+RADICAL-SAM*→   <-rve_3 | GT4+B12-binding+RADICAL-SAM      | 1400 | WJ08_12515  | Betaproteobacteria  | Burkholderia vietnamiensis | radical SAM protein [Burkholderia vietnamiensis]           | GCA_001524025.1 |
| KVM90153.1   | GT4+B12-binding+RADICAL-SAM*→                                                            | GT4+B12-binding+RADICAL-SAM      | 1404 | WT05_03580  | Betaproteobacteria  | Burkholderia stagnalis     | radical SAM protein [Burkholderia stagnalis]               | GCA_001527545.1 |
| KVM94412.1   | TniB→?→ NLPC→   <-?  ?→ GT4+B12-binding+RADICAL-SAM*→                                    | GT4+B12-binding+RADICAL-SAM      | 1404 | WT07_28140  | Betaproteobacteria  | Burkholderia stagnalis     | radical SAM protein [Burkholderia stagnalis]               | GCA_001527585.1 |
| KVX13946.1   | GT4*→   <-?  ABhydrolase→   <-TRANSGLUTAMINASE                                           | GT4                              | 282  | WL03_19390  | Betaproteobacteria  | Burkholderia ubonensis     | hypothetical protein WL03_19390 [Burkholderia ubonensis]   | GCA_001539165.1 |
| KVZ11040.1   | GT4+APATPase+TPR+TPR*→                                                                   | GT4+APATPase+TPR+TPR             | 1278 | WL11_04565  | Betaproteobacteria  | Burkholderia ubonensis     | hypothetical protein WL11_04565 [Burkholderia ubonensis]   | GCA_001530465.1 |
| KWI84975.1   | GT4*→   <-?  ABhydrolase→   <-TRANSGLUTAMINASE                                           | GT4                              | 325  | WM08_23745  | Betaproteobacteria  | Burkholderia ubonensis     | hypothetical protein WM08_23745 [Burkholderia ubonensis]   | GCA_001534135.1 |
| KWK82218.1   | NACHT+TPR+GT4*→                                                                          | NACHT+TPR+GT4                    | 1024 | WM17_17155  | Betaproteobacteria  | Burkholderia ubonensis     | hypothetical protein WM17_17155 [Burkholderia ubonensis]   | GCA_001533745.1 |
| MBA3007143.1 | APATPase+GT4+TPR+TPR+TPR+TPR+TPR*→                                                       | APATPase+GT4+TPR+TPR+TPR+TPR+TPR | 1488 | FP810_11305 | Deltaproteobacteria | Desulfocapsa sp.           | tetratricopeptide repeat protein [Desulfocapsa sp.]        | GCA_013792135.1 |
| MBA3548505.1 | GT4*→                                                                                    | GT4                              | 125  | H0T76_18640 | Deltaproteobacteria | Nannocystis sp.            | glycosyltransferase [Nannocystis sp.]                      | GCA_013812955.1 |
| MBS82255.1   | NACHT+GT4*→?→?→?→   <-?<-?<-SIG+rve                                                      | NACHT+GT4                        | 1659 | CMO32_42310 | Betaproteobacteria  | Variovorax sp.             | hypothetical protein CMO32_42310 [Variovorax sp.]          | GCA_002729445.1 |

| acc        | operon                                                                               | architecture                           | len  | gen.name    | taxend              | species                                        | define                                                                            | gca             |
|------------|--------------------------------------------------------------------------------------|----------------------------------------|------|-------------|---------------------|------------------------------------------------|-----------------------------------------------------------------------------------|-----------------|
| MQY06528.1 | REase+SFI-ATPase→?→?→    <?  ?→    <?  GT4+APATPase+TPR+TPR*→                        | GT4+APATPase+TPR+TPR                   | 1104 | mshA_10     | Actinobacteria      | Actinomadura sp. RB68                          | D-inositol-3-phosphate glycosyltransferase [Actinomadura sp. RB68]                | GCA_009604375.1 |
| MQY24997.1 | ESX-1_EspG→    <?<?  ?→?→?→ WXG+TOXIN-PL+ART+Caspase+ZetaToxin+GT4*→                 | WXG+TOXIN-PL+ART+Caspase+ZetaToxin+GT4 | 3249 | mshA_3      | Actinobacteria      | Nocardia sp. RB56                              | D-inositol-3-phosphate glycosyltransferase [Nocardia sp. RB56]                    | GCA_009604425.1 |
| MSV29911.1 | GT4+APATPase+BetaPropeller*→                                                         | GT4+APATPase+BetaPropeller             | 1058 | EXQ52_14375 | Acidobacteria       | Bryobacteriales bacterium                      | glycosyltransferase [Bryobacteriales bacterium]                                   | GCA_009697455.1 |
| MWJ13606.1 | ABC_tran→?→    <?  GT4*→    <?  ?→?→?→    <?  tRNA→?→ Pribosyltran_N+Pribosyl_synth→ | GT4                                    | 267  | DOT98_12255 | Actinobacteria      | Clavibacter michiganensis subsp. michiganensis | hypothetical protein DOT98_12255 [Clavibacter michiganensis subsp. michiganensis] | GCA_009793225.1 |
| NED51435.1 | GT4*→                                                                                | GT4                                    | 88   | G3I24_11000 | Actinobacteria      | Micromonospora aurantiaca                      | glycosyl transferase family 1, partial [Micromonospora aurantiaca]                | GCA_010550585.1 |
| NNJ62389.1 | DUF4913→?→ GT4*→                                                                     | GT4                                    | 464  | HKP61_15900 | Actinobacteria      | Dactylosporangium sp.                          | glycosyltransferase family 4 protein [Dactylosporangium sp.]                      | GCA_013041765.1 |
| NOX21677.1 | Asparaginase_II→ Acetyltransf_6→ GT4*→?→?→    <?<-SIG+TM+TM+TM<-THUMP+ThiI           | GT4                                    | 407  | GXP36_01090 | Actinobacteria      | Actinobacteria bacterium                       | glycosyltransferase [Actinobacteria bacterium]                                    | GCA_013151445.1 |
| NQZ33933.1 | GT4+APATPase*→                                                                       | GT4+APATPase                           | 841  | HRU06_21905 | Gammaproteobacteria | Oceanospirillaceae bacterium                   | glycosyltransferase, partial [Oceanospirillaceae bacterium]                       | GCA_013215375.1 |
| NTC82454.1 | <-TniB<-?<-?<-?  ?→?→?→ NACHT+GT4*→                                                  | NACHT+GT4                              | 1640 | G6M81_07325 | Alphaproteobacteria | Agrobacterium tumefaciens                      | glycosyltransferase [Agrobacterium tumefaciens]                                   | GCA_013319045.1 |
| NUQ74496.1 | SIR2+TPR+SAVED+GT4*→                                                                 | SIR2+TPR+SAVED+GT4                     | 1362 | HUU21_13150 | Deltaproteobacteria | Polyangiaceae bacterium                        | glycosyltransferase [Polyangiaceae bacterium]                                     | GCA_013360665.1 |

| acc        | operon                                                                                       | architecture                | len  | gen.name    | taxend              | species                              | defline                                                                    | gca             |
|------------|----------------------------------------------------------------------------------------------|-----------------------------|------|-------------|---------------------|--------------------------------------|----------------------------------------------------------------------------|-----------------|
| NUS43770.1 | GT4*→                                                                                        | GT4                         | 631  | HOQ24_08805 | Actinobacteria      | Mycobacteriaceae bacterium           | glycosyltransferase family 4 protein, partial [Mycobacteriaceae bacterium] | GCA_013362555.1 |
| NUS72884.1 | SIG+GT4+ZetaToxin*→                                                                          | SIG+GT4+ZetaToxin           | 750  | HOQ05_05695 | Actinobacteria      | Corynebacteriales bacterium          | glycosyltransferase [Corynebacteriales bacterium]                          | GCA_013362805.1 |
| NUT53093.1 | SWACOS+GT4*→                                                                                 | SWACOS+GT4                  | 1162 | HOV94_38270 | Actinobacteria      | Saccharothrix sp.                    | glycosyltransferase [Saccharothrix sp.]                                    | GCA_013362745.1 |
| OAI03591.1 | GT4+APATPase+TPR*→                                                                           | GT4+APATPase+TPR            | 1115 | A1332_15425 | Gammaproteobacteria | Methylomonas methanica               | hypothetical protein A1332_15425, partial [Methylomonas methanica]         | GCA_001644035.1 |
| ODT28534.1 | GT4*→   <-?<-?  ?→   <-?<-?  ?→ NUDIX→                                                       | GT4                         | 325  | ABS63_03615 | Actinobacteria      | Microbacterium sp. SCN 70-27         | hypothetical protein ABS63_03615 [Microbacterium sp. SCN 70-27]            | GCA_001724425.1 |
| OGS75014.1 | GT4+APATPase+TPR*→                                                                           | GT4+APATPase+TPR            | 1314 | A2063_09475 | Betaproteobacteria  | Gallionellales bacterium GWA2_60_142 | hypothetical protein A2063_09475 [Gallionellales bacterium GWA2_60_142]    | GCA_001801085.1 |
| OKJ80919.1 | <-TPR+Caspase<-CATASP  CATRA-N+CATRA-C+GT4*→ HTH+APATPase+TPR→?→?→   <-?<-CATASP             | CATRA-N+CATRA-C+GT4         | 694  | AMK32_24710 | Actinobacteria      | Streptomyces sp. CB01883             | hypothetical protein AMK32_24710 [Streptomyces sp. CB01883]                | GCA_001905855.1 |
| OLT27035.1 | ZetaToxin+GT4+NUDIX+ART*→                                                                    | ZetaToxin+GT4+NUDIX+ART     | 1451 | BJF83_19460 | Actinobacteria      | Nocardiopsis sp. CNR-923             | hypothetical protein BJF83_19460 [Nocardiopsis sp. CNR-923]                | GCA_001942255.1 |
| ONI48735.1 | <-TPR+Caspase<-CATASP  CATRA-N+CATRA-C+GT4*→ HTH+APATPase+TPR→   <-HTH  ?→?→?→   <-?<-CATASP | CATRA-N+CATRA-C+GT4         | 727  | mshA_4      | Actinobacteria      | Streptomyces sp. IB2014 011-1        | D-inositol 3-phosphate glycosyltransferase [Streptomyces sp. IB2014 011-1] | GCA_001983595.1 |
| OPK01862.1 | GT4+B12-binding+RADICAL-SAM*→                                                                | GT4+B12-binding+RADICAL-SAM | 1407 | BZ164_25460 | Gammaproteobacteria | Pseudomonas veronii                  | hypothetical protein BZ164_25460 [Pseudomonas veronii]                     | GCA_002029325.1 |



| acc        | operon                                        | architecture                | len  | gen.name    | taxend              | species                                                 | define                                                                                           | gca             |
|------------|-----------------------------------------------|-----------------------------|------|-------------|---------------------|---------------------------------------------------------|--------------------------------------------------------------------------------------------------|-----------------|
| OWQ88588.1 | GT4+HD*→                                      | GT4+HD                      | 1415 | CDN99_17225 | Betaproteobacteria  | Roseateles aquatilis                                    | hypothetical protein<br>CDN99_17225<br>[Roseateles aquatilis]                                    | GCA_002205645.1 |
| OXM47905.1 | <-TIR+APATPase  HTH+APATPase+TPR+GT4*→        | HTH+APATPase+TPR+GT4        | 1166 | CFP75_23295 | Actinobacteria      | Amycolatopsis alba DSM 44262                            | NTPase<br>[Amycolatopsis alba DSM 44262]                                                         | GCA_002234385.1 |
| OZV80564.1 | <-TPR+Caspase  GT4*→?→?→   <-?<-?<-ABC_tran   | GT4                         | 587  | CA850_14545 | Actinobacteria      | Micromonospora echinospora                              | hypothetical protein<br>CA850_14545<br>[Micromonospora echinospora]                              | GCA_002266845.1 |
| PBV03828.1 | STAND+GT4*→                                   | STAND+GT4                   | 1006 | CJU35_32055 | Gammaproteobacteria | Pseudomonas aeruginosa                                  | hypothetical protein<br>CJU35_32055<br>[Pseudomonas aeruginosa]                                  | GCA_002326115.1 |
| PJI96546.1 | GT4+B12-binding+RADICAL-SAM*→?→?→   <-?<-LexA | GT4+B12-binding+RADICAL-SAM | 1404 | CLU85_1299  | Betaproteobacteria  | Acidovorax sp. 69                                       | radical SAM superfamily enzyme YgiQ (UPF0313 family)<br>[Acidovorax sp. 69]                      | GCA_002797445.1 |
| PJO54021.1 | GT4*→                                         | GT4                         | 721  | CR156_18515 | Gammaproteobacteria | Stenotrophomonas lactitubi                              | hypothetical protein<br>CR156_18515<br>[Stenotrophomonas lactitubi]                              | GCA_002803515.1 |
| PKN17915.1 | NACHT+GT4*→                                   | NACHT+GT4                   | 1644 | CVU71_10310 | Deltaproteobacteria | Deltaproteobacteria bacterium HGW-Deltaproteobacteria-6 | hypothetical protein<br>CVU71_10310<br>[Deltaproteobacteria bacterium HGW-Deltaproteobacteria-6] | GCA_002840435.1 |
| PKV83308.1 | HTH→?→?→   <-?<-?  Caspase+NACHT+GT4*→        | Caspase+NACHT+GT4           | 1229 | BX283_0808  | Actinobacteria      | Streptomyces sp. TLI_146                                | glycosyltransferase involved in cell wall biosynthesis<br>[Streptomyces sp. TLI_146]             | GCA_002846415.1 |
| PNA01938.1 | GT4+APATPase+TPR+TPR*→                        | GT4+APATPase+TPR+TPR        | 1383 | C1X79_03750 | Gammaproteobacteria | Pseudomonas sp. FW305-42                                | hypothetical protein<br>C1X79_03750<br>[Pseudomonas sp. FW305-42]                                | GCA_002883975.1 |

| acc        | operon                                                                                                                                                              | architecture                                                                                                                           | len   | gen.name     | taxend              | species                     | define                                                                              | gca             |
|------------|---------------------------------------------------------------------------------------------------------------------------------------------------------------------|----------------------------------------------------------------------------------------------------------------------------------------|-------|--------------|---------------------|-----------------------------|-------------------------------------------------------------------------------------|-----------------|
| PRY58656.1 | GT4*→ APATPase+TPR→   <-?<-TRPR-HTH+PBPI                                                                                                                            | GT4                                                                                                                                    | 412   | B0I28_105371 | Actinobacteria      | Glycomyces artemisiae       | glycosyltransferase involved in cell wall biosynthesis [Glycomyces artemisiae]      | GCA_003002955.1 |
| PSR67860.1 | WXG+MPTase→ WXG+LuxR-HTH+LuxR-HTH+LuxR-HTH+LuxR-HTH+TetR-HTH+TetR-HTH+LuxR-HTH+LuxR-HTH+LexA-HTH+LuxR-HTH+LuxR-HTH+LuxR-HTH+LuxR-HTH+LuxR-HTH+PP2C*→?→ ABhydrolase→ | WXG+LuxR-HTH+LuxR-HTH+LuxR-HTH+LuxR-HTH+TetR-HTH+TetR-HTH+LuxR-HTH+LuxR-HTH+LexA-HTH+LuxR-HTH+LuxR-HTH+LuxR-HTH+LuxR-HTH+LuxR-HTH+PP2C | 14198 | C8258_13415  | Actinobacteria      | Nocardia sp. MDA0666        | hypothetical protein C8258_13415 [Nocardia sp. MDA0666]                             | GCA_003023875.1 |
| PXX02325.1 | GT4+B12-binding+RADICAL-SAM*→                                                                                                                                       | GT4+B12-binding+RADICAL-SAM                                                                                                            | 1404  | C7400_1582   | Betaproteobacteria  | Paraburkholderia tropica    | radical SAM superfamily enzyme YgiQ (UPF0313 family) [Paraburkholderia tropica]     | GCA_003201665.1 |
| PZM02119.1 | <-MODE-HTH+PBPII  ?→   <-MODE-HTH+PBPII  ?→?→?→ NACHT+GT4*→                                                                                                         | NACHT+GT4                                                                                                                              | 1624  | CPJ17_11030  | Alphaproteobacteria | Rhizobium tumorigenes       | hypothetical protein CPJ17_11030 [Rhizobium tumorigenes]                            | GCA_003240565.1 |
| REF53875.1 | SWACOS+GT4*→   <-?<-MFS                                                                                                                                             | SWACOS+GT4                                                                                                                             | 1165  | BX279_1810   | Actinobacteria      | Streptomyces sp. Ag82_O1-9  | glycosyltransferase involved in cell wall biosynthesis [Streptomyces sp. Ag82_O1-9] | GCA_003386845.1 |
| RII01628.1 | STAND→?→?→ DUF4913→   <-AbiEii<-AbiEi_4  ?→ GT4*→?→ AbiEi_4→                                                                                                        | GT4                                                                                                                                    | 476   | NI17_16340   | Actinobacteria      | Thermobifida halotolerans   | hypothetical protein NI17_16340 [Thermobifida halotolerans]                         | GCA_003574835.1 |
| RKS05362.1 | <-APATPase+TPR  ?→ GT4*→                                                                                                                                            | GT4                                                                                                                                    | 412   | DFP74_0957   | Actinobacteria      | Nocardiopsis sp. Huas11     | glycosyltransferase involved in cell wall biosynthesis [Nocardiopsis sp. Huas11]    | GCA_003634495.1 |
| ROV69600.1 | <-ABC_tran<-?  PSE→ Caspase+NACHT+GT4*→                                                                                                                             | Caspase+NACHT+GT4                                                                                                                      | 1187  | D3105_04960  | Actinobacteria      | Streptomyces globisporus    | glycosyltransferase [Streptomyces globisporus]                                      | GCA_003501885.1 |
| RSM57832.1 | cNMP_binding+HTH_Crp_2→?→ GT4*→   <-ACYC+APATPase+TPR                                                                                                               | GT4                                                                                                                                    | 411   | DMH03_26130  | Actinobacteria      | Amycolatopsis sp. WAC 01376 | hypothetical protein DMH03_26130 [Amycolatopsis sp. WAC 01376]                      | GCA_003947415.1 |
| RWH25252.1 | <-Vsr  ?→?→?→   <-?  GT4+Trypsin+PNPase*→                                                                                                                           | GT4+Trypsin+PNPase                                                                                                                     | 961   | EOQ76_19695  | Alphaproteobacteria | Mesorhizobium sp.           | glycosyltransferase [Mesorhizobium sp.]                                             | GCA_004019165.1 |

| acc        | operon                                      | architecture | len  | gen.name             | taxend              | species                       | define                                                                              | gca             |
|------------|---------------------------------------------|--------------|------|----------------------|---------------------|-------------------------------|-------------------------------------------------------------------------------------|-----------------|
| RYG90150.1 | GT4*→                                       | GT4          | 425  | EON59_00395          | Alphaproteobacteria | Alphaproteobacteria bacterium | glycosyltransferase, partial [Alphaproteobacteria bacterium]                        | GCA_004145145.1 |
| RYZ67144.1 | GT4*→                                       | GT4          | 290  | EOP09_11535          | Proteobacteria      | Proteobacteria bacterium      | glycosyltransferase family 1 protein, partial [Proteobacteria bacterium]            | GCA_004174565.1 |
| SCF29539.1 | <-TPR+Caspase  GT4*→?→?→   <-?<-?<-ABC_tran | GT4          | 549  | GA0070618_4941       | Actinobacteria      | Micromonospora echinospora    | Glycosyltransferase involved in cell wall biosynthesis [Micromonospora echinospora] | GCA_900091495.1 |
| SCF46304.1 | <-WXG<-?<-?<-?<-?<-TPR+Caspase  GT4*→       | GT4          | 549  | GA0070563_114162     | Actinobacteria      | Micromonospora carbonacea     | Glycosyltransferase involved in cell wall biosynthesis [Micromonospora carbonacea]  | GCA_900091535.1 |
| SCH34126.1 | GT4*→ TIR→                                  | GT4          | 721  | SAMEA3545339_F00664  | Firmicutes          | uncultured Clostridium sp.    | glycosyltransferase%2C MSMEG_0565 family [uncultured Clostridium sp.]               | GCA_900066565.1 |
| SCL28302.1 | <-TPR+Caspase  GT4*→                        | GT4          | 545  | GA0074694_5072       | Actinobacteria      | Micromonospora inyonensis     | Glycosyltransferase involved in cell wall biosynthesis [Micromonospora inyonensis]  | GCA_900091415.1 |
| SCZ75034.1 | SWACOS+GT4*→?→?→   <-?<-?  MFS→             | SWACOS+GT4   | 1147 | SAMN03159460_05304   | Alphaproteobacteria | Pseudomonas sp. NFPP17        | Glycosyltransferase involved in cell wall biosynthesis [Pseudomonas sp. NFPP17]     | GCA_900102935.1 |
| SDU29240.1 | rve_3→ GT4*→                                | GT4          | 362  | SAMN04488548_A131376 | Actinobacteria      | Gordonia westfalica           | Glycosyltransferase involved in cell wall biosynthesis [Gordonia westfalica]        | GCA_900105725.1 |
| SDX14297.1 | LRR+AP-GTPase+COR→ GT4*→                    | GT4          | 472  | SAMN05216300_B1402   | Alphaproteobacteria | Nitrosomonas oligotropha      | Glycosyltransferase involved in cell wall biosynthesis [Nitrosomonas oligotropha]   | GCA_900106555.1 |

| acc        | operon                                                                                                                     | architecture        | len  | gen.name     | taxend              | species                      | define                                                                                | gca             |
|------------|----------------------------------------------------------------------------------------------------------------------------|---------------------|------|--------------|---------------------|------------------------------|---------------------------------------------------------------------------------------|-----------------|
| SEK03344.1 | <-Sigma  ?→   <-?<-?<-?  GT4+B12-binding*→                                                                                 | GT4+B12-binding     | 1051 | SAMN05518849 | Alphaproteobacteria | Sphingobium sp. AP50         | Glycosyltransferase involved in cell wall biosynthesis [Sphingobium sp. AP50]         | GCA_900109095.1 |
| SIO56974.1 | STAND+TPR+GT4*→                                                                                                            | STAND+TPR+GT4       | 1125 | SAMN05444165 | Beta-proteobacteria | Paraburkholderia phenazinium | Glycosyltransferase involved in cell wall biosynthesis [Paraburkholderia phenazinium] | GCA_900142845.1 |
| SNR45646.1 | HTH_Tnp_1→ TnpB_IS66→?→ NACHT+GT4*→                                                                                        | NACHT+GT4           | 1639 | SAMN06265370 | Alphaproteobacteria | Puniceibacterium sediminis   | Glycosyltransferase involved in cell wall biosynthesis [Puniceibacterium sediminis]   | GCA_900188035.1 |
| TAK32775.1 | GT4*→                                                                                                                      | GT4                 | 646  | EPO40_01735  | Deltaproteobacteria | Myxococcaceae bacterium      | glycosyltransferase [Myxococcaceae bacterium]                                         | GCA_004297725.1 |
| TCO61886.1 | GT4*→   <-TPR                                                                                                              | GT4                 | 392  | EV192_10223  | Actinobacteria      | Actinocrispum wychmicini     | glycosyltransferase involved in cell wall biosynthesis [Actinocrispum wychmicini]     | GCA_004345645.1 |
| TDP89614.1 | GT4*→ TIR+APATPase+TPR→ TPR+Caspase→   <-TPR+Caspase<-CATASP  CATRA-N+CATRA-C+GT4→                                         | GT4                 | 328  | EV186_11214  | Actinobacteria      | Labeledaea rhizosphaerae     | glycosyltransferase involved in cell wall biosynthesis [Labeledaea rhizosphaerae]     | GCA_004362825.1 |
| TGX49078.1 | GT4+NACHT*→                                                                                                                | GT4+NACHT           | 1219 | E5A73_19725  | Alphaproteobacteria | Sphingomonas gei             | glycosyltransferase [Sphingomonas gei]                                                | GCA_004792685.1 |
| TPG40509.1 | GT4*→                                                                                                                      | GT4                 | 136  | EAH79_11405  | Alphaproteobacteria | Sphingomonas koreensis       | glycosyltransferase [Sphingomonas koreensis]                                          | GCA_006438735.1 |
| TQL90659.1 | <-DUF4242<-?<-?<-PSE  ?→   <-HTH+APATPase+TPR<-TPR+Caspase<-CATASP  CATRA-N+CATRA-C+GT4*→   <-?<-?<-?<-?<-REase+SFI-ATPase | CATRA-N+CATRA-C+GT4 | 735  | FB559_7970   | Actinobacteria      | Actinoallomurus bryophytorum | glycosyltransferase involved in cell wall biosynthesis [Actinoallomurus bryophytorum] | GCA_006716425.1 |

| acc            | operon                                                                                    | architecture                    | len  | gen.name        | taxend              | species                    | define                                                                              | gca             |
|----------------|-------------------------------------------------------------------------------------------|---------------------------------|------|-----------------|---------------------|----------------------------|-------------------------------------------------------------------------------------|-----------------|
| TWH06591.1     | <-TPR+Caspase  GT4*→?→?→   <-?<-?<-ABC_tran                                               | GT4                             | 587  | JD80_04174      | Actinobacteria      | Micromonospora echinospora | glycosyltransferase involved in cell wall biosynthesis [Micromonospora echinospora] | GCA_007829475.1 |
| TWJ29688.1     | <-TPR+Caspase  GT4*→?→?→   <-?<-?<-ABC_tran                                               | GT4                             | 549  | JD81_03199      | Actinobacteria      | Micromonospora sagamiensis | glycosyltransferase involved in cell wall biosynthesis [Micromonospora sagamiensis] | GCA_007829995.1 |
| TXH45940.1     | GT4+nSTAND1+ANK+ANK*→                                                                     | GT4+nSTAND1+ANK+ANK             | 1838 | E6Q92_02710     | Betaproteobacteria  | Burkholderiaceae bacterium | hypothetical protein E6Q92_02710 [Burkholderiaceae bacterium]                       | GCA_008012415.1 |
| VBB15457.1     | GT4+B12-binding+RADICAL-SAM*→                                                             | GT4+B12-binding+RADICAL-SAM     | 1404 | BSTAB16_5653    | Betaproteobacteria  | Burkholderia stabilis      | radical SAM protein [Burkholderia stabilis]                                         | GCA_900240005.1 |
| VBK75063.1     | GT4+B12-binding+RADICAL-SAM*→                                                             | GT4+B12-binding+RADICAL-SAM     | 1404 | SAMEA2064914    | Betaproteobacteria  | Burkholderia pseudomallei  | Glycogen synthase [Burkholderia pseudomallei]                                       | GCA_900592755.1 |
| WP_005483680.1 | TRANSGLUTAMINASE→   <-?<-Zeta_toxin<-?<-?  ?→ GT4*→   <-?<-?<-?<-?<-DUF4913               | GT4                             | 590  | SBD_RS28370     | Actinobacteria      | Streptomyces               | MULTISPECIES: glycosyltransferase [Streptomyces]                                    | GCF_000340335.1 |
| WP_007453552.1 | Multi-TM→?→ STAND→?→ DUF4913→   <-?  ?→ GT4*→?→?→?→ NUDIX→   <-?  ?→ PSE→ ABC_tran→       | GT4                             | 437  | MILUP08_RS00205 | Actinobacteria      | Micromonospora lupini      | glycosyltransferase family 4 protein [Micromonospora lupini]                        | GCF_000297395.2 |
| WP_007734957.1 | STAND+TPR+GT4*→                                                                           | STAND+TPR+GT4                   | 1062 | B5Z53_RS05165   | Betaproteobacteria  | Paraburkholderia hospita   | glycosyltransferase [Paraburkholderia hospita]                                      | GCF_900167965.1 |
| WP_007954182.1 | SQHop_cyclase_C+Prenyltrans+GT4*→?→   <-?  ?→   <-?  ?→ XylR_N+V4R+Sigma54_activat+HTH_8→ | SQHop_cyclase_C+Prenyltrans+GT4 | 779  | JBW_RS18725     | Firmicutes          | Pelosinus fermentans       | glycosyltransferase [Pelosinus fermentans]                                          | GCF_000271665.2 |
| WP_010223837.1 | GT4+STAND*→ TPR→   <-MODE-HTH+PBPII                                                       | GT4+STAND                       | 546  | UW3_RS011698    | Gammaproteobacteria | Pseudomonas donghuensis    | glycosyltransferase [Pseudomonas donghuensis]                                       | GCF_000259195.1 |
| WP_013226178.1 | <-TIR+APATPase  HTH+APATPase+TPR+GT4*→                                                    | HTH+APATPase+TPR+GT4            | 1178 | IW14_RS45345    | Actinobacteria      | Amycolatopsis mediterranei | glycosyltransferase [Amycolatopsis mediterranei]                                    | GCF_000196835.1 |
| WP_017131143.1 | APATPase+GT4*→                                                                            | APATPase+GT4                    | 1299 | BMX68_RS1184    | Gammaproteobacteria | Pseudomonas agarici        | glycosyltransferase [Pseudomonas agarici]                                           | GCF_900109755.1 |

| acc            | operon                                                                                                               | architecture                | len  | gen.name       | taxend                | species                     | define                                                                  | gca             |
|----------------|----------------------------------------------------------------------------------------------------------------------|-----------------------------|------|----------------|-----------------------|-----------------------------|-------------------------------------------------------------------------|-----------------|
| WP_017594508.1 | GT4*→                                                                                                                | GT4                         | 503  | D459_RS0118563 | Actinobacteria        | Nocardiopsis potens         | glycosyltransferase family 4 protein [Nocardiopsis potens]              | GCF_000341105.1 |
| WP_018327601.1 | <-TniB<-?  ?→   <-?<-?  GT4+B12-binding+RADICAL-SAM*→   <-?<-?  SIG+rve→                                             | GT4+B12-binding+RADICAL-SAM | 1381 | GGD55_RS15171  | Alphaproteobacteria   | Rhizobium giardinii         | B12-binding domain-containing radical SAM protein [Rhizobium giardinii] | GCF_014200295.1 |
| WP_018612920.1 | STAND+TPR+GT4*→                                                                                                      | STAND+TPR+GT4               | 1063 | CFII68_RS03385 | Gamma-<br>teobacteria | Pseudomonas sp. CFII68      | glycosyltransferase [Pseudomonas sp. CFII68]                            | GCF_000416195.1 |
| WP_019063569.1 | MFS→   <-?<-TPR+Caspase<-CATASP  CATRA-N+CATRA-C+GT4*→<br>HTH+APATPase+TPR→   <-PSE  ?→?→   <-?<-CATASP<-TPR+Caspase | CATRA-N+CATRA-C+GT4         | 720  | SPR02S_RS44725 | Actinobacteria        | Streptomyces prunicolor     | glycosyltransferase family 4 protein [Streptomyces prunicolor]          | GCF_000367365.1 |
| WP_019093712.1 | SWACOS+GT4*→                                                                                                         | SWACOS+GT4                  | 1138 | BK646_RS17250  | Gamma-<br>teobacteria | Pseudomonas protegens       | glycosyltransferase [Pseudomonas protegens]                             | GCF_003732085.1 |
| WP_019609270.1 | <-AbiEii<-AbiEi_4  ?→ GT4*→                                                                                          | GT4                         | 497  | G011_RS0115483 | Actinobacteria        | Nocardiopsis sp. CNS-639    | glycosyltransferase family 4 protein [Nocardiopsis sp. CNS-639]         | GCF_000381685.1 |
| WP_020647322.1 | <-TIR+APATPase  HTH+APATPase+TPR+GT4*→                                                                               | HTH+APATPase+TPR+GT4        | 1192 | A3CE_RS0148230 | Actinobacteria        | Amycolatopsis balhimycina   | tetratricopeptide repeat protein [Amycolatopsis balhimycina]            | GCF_000384295.1 |
| WP_023267980.1 | GT4+APATPase+TPR+TPR*→                                                                                               | GT4+APATPase+TPR+TPR        | 1323 | SHD_RS15540    | Gamma-<br>teobacteria | Shewanella decolorationis   | tetratricopeptide repeat protein [Shewanella decolorationis]            | GCF_000485795.1 |
| WP_024631061.1 | <-AAA_21  GT4*→                                                                                                      | GT4                         | 1140 | P364_RS0115745 | Firmicutes            | Paenibacillus sp. MAEPY2    | glycosyltransferase [Paenibacillus sp. MAEPY2]                          | GCF_000499205.1 |
| WP_027196515.1 | Cluster214_2clades→ GT4*→                                                                                            | GT4                         | 760  | BJG93_RS27460  | Betaproteobacteria    | Paraburkholderia spreintiae | glycosyltransferase family 4 protein [Paraburkholderia spreintiae]      | GCF_001865575.1 |
| WP_029881581.1 | <-AAA_21  GT4*→                                                                                                      | GT4                         | 1003 | P363_RS0103940 | Firmicutes            | Paenibacillus sp. MAEPY1    | glycosyltransferase, partial [Paenibacillus sp. MAEPY1]                 | GCF_000499305.1 |

| acc            | operon                                                                                                                                                                                                                             | architecture                                                                                                                                                                                                       | len   | gen.name       | taxend               | species                          | define                                                                        | gca             |
|----------------|------------------------------------------------------------------------------------------------------------------------------------------------------------------------------------------------------------------------------------|--------------------------------------------------------------------------------------------------------------------------------------------------------------------------------------------------------------------|-------|----------------|----------------------|----------------------------------|-------------------------------------------------------------------------------|-----------------|
| WP_031021212.1 | ABC_tran->   <-?<-CATASP  CATRA-N+CATRA-C+GT4*-> HTH+APATPase+TPR->   <-HTH  ?->?->?->   <-?<-CATASP                                                                                                                               | CATRA-N+CATRA-C+GT4                                                                                                                                                                                                | 705   | IF98_RS0120305 | Actinobacteria       | Streptomyces sp. NRRL S-1314     | glycosyltransferase family 4 protein [Streptomyces sp. NRRL S-1314]           | GCF_000719785.1 |
| WP_031063336.1 | ABC_tran->   <-?<-CATASP  CATRA-N+CATRA-C+GT4*-> HTH+APATPase+TPR->   <-HTH  ?->?->?->   <-?<-CATASP                                                                                                                               | CATRA-N+CATRA-C+GT4                                                                                                                                                                                                | 705   | IH17_RS0118610 | Actinobacteria       | Streptomyces sp. NRRL F-5527     | glycosyltransferase family 4 protein [Streptomyces sp. NRRL F-5527]           | GCF_014649055.1 |
| WP_033524509.1 | TRANSGLUTAMINASE->   <-?  ?->   <-?  GT4+NUDIX+ART+PolB-NTase->   <-?<-?<-?  ?-> GT4->   <-?<-?<-?<-?<-DUF4913                                                                                                                     | GT4+NUDIX+ART+PolB-NTase                                                                                                                                                                                           | 589   | KS09_RS00195   | Actinobacteria       | Streptomyces galbus              | glycosyltransferase [Streptomyces galbus]                                     | GCF_000772895.1 |
| WP_035284396.1 | APATPase+TPR-> GT4*->                                                                                                                                                                                                              | GT4                                                                                                                                                                                                                | 502   | UO65_RS36825   | Actinobacteria       | Actinokineospora spheciospongiae | glycosyltransferase [Actinokineospora spheciospongiae]                        | GCF_000564855.1 |
| WP_036515011.1 | WXG+MPTase-> WXG+SecA+HTH+HTH+HTH+HTH+HTH+ST-HisKin+PP2C+MPTase+GT4+TetR-HTH+TetR-HTH+TM+TM+TM+TM+TM+TM+TM+LuxR-HTH+LuxR-HTH+LuxR-HTH+LuxR-HTH+LuxR-HTH+LuxR-HTH+LuxR-HTH+GNTR-HTH+GNTR-HTH+GNTR-HTH+GNTR-HTH+GNTR-HTH+GNTR-HTH*-> | WXG+SecA+HTH+HTH+HTH+HTH+HTH+ST-HisKin+PP2C+MPTase+GT4+TetR-HTH+TetR-HTH+TM+TM+TM+TM+TM+TM+TM+LuxR-HTH+LuxR-HTH+LuxR-HTH+LuxR-HTH+LuxR-HTH+LuxR-HTH+LuxR-HTH+GNTR-HTH+GNTR-HTH+GNTR-HTH+GNTR-HTH+GNTR-HTH+GNTR-HTH | 12585 | NRH01S_RS18840 | Actinobacteria       | Nocardia rhamnosiphila           | GntR family transcriptional regulator [Nocardia rhamnosiphila]                | GCF_001613485.1 |
| WP_036994826.1 | MFS->   <-?  GT4+APATPase+TPR*->   <-MODE-HTH+PBPII                                                                                                                                                                                | GT4+APATPase+TPR                                                                                                                                                                                                   | 1318  | BV82_RS07620   | Gamma-proteobacteria | Pseudomonas donghuensis          | glycosyltransferase [Pseudomonas donghuensis]                                 | GCF_000696345.1 |
| WP_037254756.1 | cNMP_binding+HTH_Crp_2->?-> GT4*->   <-ACYC+APATPase+TPR                                                                                                                                                                           | GT4                                                                                                                                                                                                                | 404   | DMH04_42005    | Actinobacteria       | Kibdelosporangium aridum         | glycosyltransferase [Kibdelosporangium aridum]                                | -               |
| WP_039793765.1 | <-TIR+APATPase  HTH+APATPase+TPR+GT4*->                                                                                                                                                                                            | HTH+APATPase+TPR+GT4                                                                                                                                                                                               | 1175  | CFP75_RS23290  | Actinobacteria       | Amycolatopsis alba               | glycosyltransferase [Amycolatopsis alba]                                      | GCF_000384215.1 |
| WP_040866957.1 | WXG+MPTase-> WXG+SecA+GT4+TetR-HTH+MPTase+HTH+HTH+HTH+HTH+HTH+HTH+HTH+HTH+HTH*->                                                                                                                                                   | WXG+SecA+GT4+TetR-HTH+MPTase+HTH+HTH+HTH+HTH+HTH+HTH+HTH+HTH                                                                                                                                                       | 5345  | ON29_RS15345   | Actinobacteria       | Nocardia exalbida                | helix-turn-helix domain-containing protein [Nocardia exalbida]                | GCF_000308575.1 |
| WP_041117337.1 | SWACOS+GT4*->?->   <-?<-?  MFS->                                                                                                                                                                                                   | SWACOS+GT4                                                                                                                                                                                                         | 1138  | PPC_RS11795    | Gamma-proteobacteria | Pseudomonas protegens            | glycosyltransferase [Pseudomonas protegens]                                   | GCF_000828695.1 |
| WP_042132624.1 | GT4+B12-binding+RADICAL-SAM*->                                                                                                                                                                                                     | GT4+B12-binding+RADICAL-SAM                                                                                                                                                                                        | 1393  | BJQ15_RS27760  | Gamma-proteobacteria | Pseudomonas                      | MULTISPECIES: B12-binding domain-containing radical SAM protein [Pseudomonas] | GCF_000730605.1 |

| acc            | operon                                                                       | architecture                                                 | len  | gen.name         | taxend              | species                             | define                                                                      | gca             |
|----------------|------------------------------------------------------------------------------|--------------------------------------------------------------|------|------------------|---------------------|-------------------------------------|-----------------------------------------------------------------------------|-----------------|
| WP_043243023.1 | Ribosomal_L20→?→?→?→?→ tRNA→?→ GT4+B12-binding+RADICAL-SAM*→                 | GT4+B12-binding+RADICAL-SAM                                  | 1402 | TX97_RS10150     | Gammaproteobacteria | <i>Pseudomonas alcaligenes</i>      | B12-binding domain-containing radical SAM protein [Pseudomonas alcaligenes] | GCF_000474255.1 |
| WP_043510995.1 | WXG+GT4+GT4+REase*→                                                          | WXG+GT4+GT4+REase                                            | 4153 | ACSP50_RS07520   | Actinobacteria      | unclassified Actinoplanes           | MULTISPECIES: glycosyltransferase [unclassified Actinoplanes]               | GCF_000237145.1 |
| WP_043738635.1 | WXG+MPase→ WXG+SecA+GT4+TetR-HTH+TetR-HTH+MPase+HTH+HTH+HTH+HTH+HTH+HTH*→    | WXG+SecA+GT4+TetR-HTH+TetR-HTH+MPase+HTH+HTH+HTH+HTH+HTH+HTH | 8037 | ON27_RS37615     | Actinobacteria      | <i>Nocardia asiatica</i>            | helix-turn-helix domain-containing protein [Nocardia asiatica]              | GCF_000308415.1 |
| WP_045583922.1 | <-SIG+HTH_23+HTH_32  GT4+TPR*→                                               | GT4+TPR                                                      | 1241 | VY88_RS20945     | Alphaproteobacteria | <i>Azospirillum thiophilum</i>      | tetratricopeptide repeat protein [Azospirillum thiophilum]                  | GCF_001305595.1 |
| WP_050363680.1 | Multi-TM→?→ STAND→?→ DUF4913→?→ GT4*→?→ Zeta_toxin→   <-ABC_tran             | GT4                                                          | 555  | DC095_RS07800    | Actinobacteria      | <i>Streptomyces</i>                 | MULTISPECIES: glycosyltransferase family 4 protein [Streptomyces]           | GCF_000700005.2 |
| WP_050791877.1 | GT4+B12-binding+RADICAL-SAM*→?→   <-PSE<-?  ?→   <-?<-?  Sigma→              | GT4+B12-binding+RADICAL-SAM                                  | 1403 | BUBO0001_RS30005 | Alphaproteobacteria | <i>Burkholderia ubonensis</i>       | B12-binding domain-containing radical SAM protein [Burkholderia ubonensis]  | GCF_000170335.1 |
| WP_051466857.1 | TPR+Caspase→ CATRA-N+CATRA-C+GT4*→ HTH+APATase+TPR→   <-TPR+Caspase  CATASP→ | CATRA-N+CATRA-C+GT4                                          | 812  | BCD49_RS04570    | Actinobacteria      | <i>Frankia</i>                      | MULTISPECIES: glycosyltransferase family 4 protein [Frankia]                | GCF_000235425.2 |
| WP_051653780.1 | MNS+GT4*→   <-?  PSE→ ABC_tran→                                              | MNS+GT4                                                      | 1132 | KCH_RS38295      | Actinobacteria      | <i>Kitasatospora cheerisanensis</i> | glycosyltransferase [Kitasatospora cheerisanensis]                          | GCF_000696185.1 |
| WP_051722648.1 | Multi-TM→?→ STAND→?→ DUF4913→?→ GT4*→?→ Zeta_toxin→                          | GT4                                                          | 561  | IF83_RS0111160   | Actinobacteria      | <i>Streptomyces albus</i>           | glycosyltransferase family 4 protein [Streptomyces albus]                   | GCF_000719865.1 |
| WP_051765847.1 | <-CASPASE+FGS<-?<-?<-?  GT4*→                                                | GT4                                                          | 406  | OQ01_RS21365     | Actinobacteria      | <i>Saccharothrix syringae</i>       | glycosyltransferase [Saccharothrix syringae]                                | GCF_000716755.1 |
| WP_051865326.1 | GT4*→                                                                        | GT4                                                          | 621  | IG99_RS44170     | Actinobacteria      | <i>Streptomyces griseus</i>         | glycosyltransferase [Streptomyces griseus]                                  | GCF_000720255.1 |



| acc            | operon                                                                                                           | architecture                | len  | gen.name       | taxend              | species                    | define                                                                    | gca             |
|----------------|------------------------------------------------------------------------------------------------------------------|-----------------------------|------|----------------|---------------------|----------------------------|---------------------------------------------------------------------------|-----------------|
| WP_052457075.1 | <-TPR+Caspase<-CATASP  CATRA-N+CATRA-C+GT4*→ PSE→ PSE→<br>APATPase+TPR→    <-HTH  ?→    <-?<-CATASP<-TPR+Caspase | CATRA-N+CATRA-C+GT4         | 747  | HY68_RS39570   | Actinobacteria      | Streptomyces sp. AcH 505   | glycosyltransferase [Streptomyces sp. AcH 505]                            | GCF_000818175.1 |
| WP_052479793.1 | TIR+APATPase+GT4*→                                                                                               | TIR+APATPase+GT4            | 810  | APS67_RS01150  | Actinobacteria      | unclassified Streptomyces  | MULTISPECIES: TIR domain-containing protein [unclassified Streptomyces]   | GCF_000829695.1 |
| WP_053258773.1 | GT4+B12-binding+RADICAL-SAM*→                                                                                    | GT4+B12-binding+RADICAL-SAM | 1401 | ALQ35_RS05776  | Gammaproteobacteria | Pseudomonas fluorescens    | cobalamin B12-binding domain-containing protein [Pseudomonas fluorescens] | GCF_002091595.1 |
| WP_053682326.1 | MFS→?→    <-?<-?  ?→    <-?  MPTase+GT4*→?→?→    <-?<-?<-?<-ABC_tran                                             | MPTase+GT4                  | 764  | ADK55_RS26503  | Actinobacteria      | Streptomyces sp. WM4235    | DUF4157 domain-containing protein [Streptomyces sp. WM4235]               | GCF_001279725.1 |
| WP_054048489.1 | TPR+Caspase→ TIR+APATPase+TPR→    <-APATPase+TPR  GT4*→    <-HTH+APATPase+TPR                                    | GT4                         | 456  | BN1701_RS12505 | Actinobacteria      | Alloactinosynnema sp. L-07 | glycosyltransferase family 4 protein [Alloactinosynnema sp. L-07]         | GCF_900070365.1 |
| WP_055337289.1 | STAND+TPR+GT4*→?→ SIG+HTH_23+HTH_32→    <-?<-?  DJ-1_PfpI→                                                       | STAND+TPR+GT4               | 1061 | HXP36_RS10750  | Betaproteobacteria  | Ralstonia solanacearum     | glycosyltransferase [Ralstonia solanacearum]                              | GCF_001373335.1 |
| WP_055417577.1 | MNS+GT4*→                                                                                                        | MNS+GT4                     | 1164 | B1H29_RS20255  | Actinobacteria      | Streptomyces pactum        | glycosyltransferase [Streptomyces pactum]                                 | GCF_002005225.1 |
| WP_055618904.1 | NACHT+MNS→ MNS+GT4*→                                                                                             | MNS+GT4                     | 754  | JHAN_RS00420   | Actinobacteria      | Streptomyces sp. JHA19     | glycosyltransferase [Streptomyces sp. JHA19]                              | GCF_001417695.1 |
| WP_055624376.1 | MNS+GT4*→                                                                                                        | MNS+GT4                     | 1149 | JHAN_RS28925   | Actinobacteria      | Streptomyces sp. JHA19     | AAA family ATPase [Streptomyces sp. JHA19]                                | GCF_001417695.1 |
| WP_057006131.1 | GT4*→                                                                                                            | GT4                         | 773  | TU80_RS30870   | Gammaproteobacteria | Pseudomonas                | MULTISPECIES: glycosyltransferase [Pseudomonas]                           | GCF_900104875.1 |
| WP_058422527.1 | GT4+B12-binding+RADICAL-SAM*→                                                                                    | GT4+B12-binding+RADICAL-SAM | 1407 | AO063_RS26420  | Gammaproteobacteria | Pseudomonas fluorescens    | radical SAM protein [Pseudomonas fluorescens]                             | GCF_001466835.1 |

| acc            | operon                                                                                                                                                      | architecture                                                                                                                   | len  | gen.name      | taxend              | species                    | define                                                       | gca             |
|----------------|-------------------------------------------------------------------------------------------------------------------------------------------------------------|--------------------------------------------------------------------------------------------------------------------------------|------|---------------|---------------------|----------------------------|--------------------------------------------------------------|-----------------|
| WP_058721560.1 | STAND+TPR+GT4*→   <-?<-?<-?<-ABC_tran                                                                                                                       | STAND+TPR+GT4                                                                                                                  | 1063 | AT984_RS19735 | Betaproteobacteria  | Paucibacter sp. KCTC 42545 | glycosyltransferase [Paucibacter sp. KCTC 42545]             | GCF_001477625.1 |
| WP_060944940.1 | MNS+GT4*→                                                                                                                                                   | MNS+GT4                                                                                                                        | 1149 | AXW62_RS14785 | Actinobacteria      | Streptomyces hygroscopicus | glycosyltransferase [Streptomyces hygroscopicus]             | GCF_001553455.1 |
| WP_062579281.1 | GT4*→   <-?  ?→?→?→?→ SIG+SnoaL→                                                                                                                            | GT4                                                                                                                            | 372  | ASG42_RS32705 | Alphaproteobacteria | Rhizobium sp. Leaf391      | glycosyltransferase family 1 protein [Rhizobium sp. Leaf391] | GCF_001424505.1 |
| WP_062720264.1 | <-TPR+Caspase  GT4*→                                                                                                                                        | GT4                                                                                                                            | 610  | AQJ67_RS19460 | Actinobacteria      | Streptomyces caeruleatus   | glycosyltransferase [Streptomyces caeruleatus]               | GCF_001514235.1 |
| WP_062723774.1 | MNS+GT4*→                                                                                                                                                   | MNS+GT4                                                                                                                        | 1219 | AQJ67_RS36455 | Actinobacteria      | Streptomyces caeruleatus   | glycosyltransferase [Streptomyces caeruleatus]               | GCF_001514235.1 |
| WP_062964870.1 | WXG+MPTase→ WXG+SecA+ST-HisKin+LuxR-HTH+LuxR-HTH+LuxR-HTH+LuxR-HTH+ST-HisKin+GT4+TetR-HTH+TetR-HTH+Tox-ART-RSE+LuxR-HTH+PP2C+MPTase+MPTase*→?→ ABhydrolase→ | WXG+SecA+ST-HisKin+LuxR-HTH+LuxR-HTH+LuxR-HTH+LuxR-HTH+ST-HisKin+GT4+TetR-HTH+TetR-HTH+Tox-ART-RSE+LuxR-HTH+PP2C+MPTase+MPTase | 9117 | NA3_RS18555   | Actinobacteria      | Nocardia africana          | glycosyltransferase [Nocardia africana]                      | GCF_001612635.1 |
| WP_063038911.1 | WXG+TM+TM+TM→?→?→?→?→?→ WXG+ZetaToxin+GT4*→                                                                                                                 | WXG+ZetaToxin+GT4                                                                                                              | 1614 | NP3_RS06870   | Actinobacteria      | Nocardia pseudovaccinii    | zeta toxin family protein [Nocardia pseudovaccinii]          | GCF_001613225.1 |
| WP_063127006.1 | Zeta_toxin→   <-?  MPTase→?→ WXG+TM+TM+TM+TM+GT4*→                                                                                                          | WXG+TM+TM+TM+TM+GT4                                                                                                            | 1018 | NF4_RS09930   | Actinobacteria      | Nocardia fusca             | glycosyltransferase [Nocardia fusca]                         | -               |
| WP_063882776.1 | GT4+APATPase+TPR+TPR*→                                                                                                                                      | GT4+APATPase+TPR+TPR                                                                                                           | 1322 | A1L58_RS04155 | Gammaproteobacteria | Shewanella baltica         | tetratricopeptide repeat protein [Shewanella baltica]        | GCF_001620325.1 |
| WP_063889953.1 | GT4+B12-binding+RADICAL-SAM*→   <-?  ?→   <-?  ?→   <-?  ?→   <-TRPR-HTH+PBPI                                                                               | GT4+B12-binding+RADICAL-SAM                                                                                                    | 1415 | WI77_RS33765  | Betaproteobacteria  | Burkholderia ubonensis     | radical SAM protein [Burkholderia ubonensis]                 | GCF_001525885.1 |
| WP_064054195.1 | <-HTH_3  ?→?→   <-?<-Cluster466_2clades  STAND+GT4*→   <-?<-Sigma                                                                                           | STAND+GT4                                                                                                                      | 1084 | ALQ29_RS11960 | Gammaproteobacteria | Pseudomonas marginalis     | glycosyltransferase [Pseudomonas marginalis]                 | GCF_001645105.1 |
| WP_064273456.1 | GT4*→                                                                                                                                                       | GT4                                                                                                                            | 135  | A7B19_RS17315 | Actinobacteria      | Streptomyces sp. RTd22     | hypothetical protein [Streptomyces sp. RTd22]                | GCF_001650215.1 |

| acc            | operon                                                                                           | architecture                | len  | gen.name       | taxend               | species                          | define                                                                                                     | gca             |
|----------------|--------------------------------------------------------------------------------------------------|-----------------------------|------|----------------|----------------------|----------------------------------|------------------------------------------------------------------------------------------------------------|-----------------|
| WP_065910241.1 | GT4+B12-binding+RADICAL-SAM*→                                                                    | GT4+B12-binding+RADICAL-SAM | 1393 | C9382_RS17200  | Gamma-proteobacteria | unclassified<br>Pseudomonas      | MULTISPECIES:<br>cobalamin<br>B12-binding<br>domain-containing<br>protein<br>[unclassified<br>Pseudomonas] | GCF_001702265.1 |
| WP_067257069.1 | GT4*→                                                                                            | GT4                         | 398  | AQJ58_RS33820  | Actinobacteria       | Streptomyces sp.<br>DSM 15324    | glycosyltransferase family 4<br>protein<br>[Streptomyces sp.<br>DSM 15324]                                 | GCF_001514285.1 |
| WP_067481412.1 | HTH→?→    <-?  NACHT+MNS→ MNS+GT4*→                                                              | MNS+GT4                     | 764  | AH6_RS18370    | Actinobacteria       | Actinomadura<br>hibisca          | glycosyltransferase<br>[Actinomadura<br>hibisca]                                                           | GCF_001552635.1 |
| WP_067904030.1 | SWACOS+GT4*→                                                                                     | SWACOS+GT4                  | 1149 | ACH01S_RS37935 | Actinobacteria       | Actinomadura<br>chibensis        | glycosyltransferase<br>[Actinomadura<br>chibensis]                                                         | GCF_001552135.1 |
| WP_068874779.1 | HTH_3→?→    <-?<-?  ?→ MPTase→?→ NACHT+GT4*→    <-?  ?→    <-?<-?<-PSE<-?  ?→ SIG+Lipase_GDSL_2→ | NACHT+GT4                   | 1671 | AX747_RS22605  | Alphaproteobacteria  | unclassified<br>Phenylobacterium | MULTISPECIES:<br>glycosyltransferase [unclassified<br>Phenylobacterium]                                    | GCF_001557235.1 |
| WP_069042340.1 | NACHT+GT4*→                                                                                      | NACHT+GT4                   | 1642 | BSY240_RS11090 | Alphaproteobacteria  | Agrobacterium sp.<br>RAC06       | glycosyltransferase<br>[Agrobacterium<br>sp. RAC06]                                                        | GCF_001713475.1 |
| WP_070086299.1 | GT4+B12-binding+RADICAL-SAM*→                                                                    | GT4+B12-binding+RADICAL-SAM | 1393 | BJQ21_RS10430  | Gamma-proteobacteria | unclassified<br>Pseudomonas      | MULTISPECIES:<br>radical SAM<br>protein<br>[unclassified<br>Pseudomonas]                                   | GCF_001753875.1 |
| WP_071611953.1 | GT4*→?→?→?→ PadR→?→    <-?<-ABC_tran                                                             | GT4                         | 724  | F7R00_RS19755  | Firmicutes           | Clostridium<br>estertheticum     | glycosyltransferase family 4<br>protein<br>[Clostridium<br>estertheticum]                                  | GCF_001877035.1 |
| WP_071621050.1 | <-AbiEii<-AbiEi_4  ?→ GT4*→                                                                      | GT4                         | 497  | CGQ36_RS01685  | Actinobacteria       | Nocardiopsis<br>dassonvillei     | glycosyltransferase family 4<br>protein<br>[Nocardiopsis<br>dassonvillei]                                  | GCF_001877055.1 |
| WP_072444656.1 | SWACOS+GT4*→?→    <-?<-?  MFS→                                                                   | SWACOS+GT4                  | 1138 | BM382_RS27510  | Gamma-proteobacteria | unclassified<br>Pseudomonas      | MULTISPECIES:<br>glycosyltransferase [unclassified<br>Pseudomonas]                                         | GCF_900102935.1 |
| WP_073746098.1 | CASPASE→ tRNA→    <-?  MNS+GT4*→                                                                 | MNS+GT4                     | 1169 | AMK28_RS33605  | Actinobacteria       | Streptomyces sp.<br>CB02115      | glycosyltransferase<br>[Streptomyces sp.<br>CB02115]                                                       | GCF_001905645.1 |



| acc            | operon                                                            | architecture                         | len  | gen.name           | taxend                   | species                           | defline                                                                           | gca             |
|----------------|-------------------------------------------------------------------|--------------------------------------|------|--------------------|--------------------------|-----------------------------------|-----------------------------------------------------------------------------------|-----------------|
| WP_080422913.1 | GT4+APATPase+TPR+TPR*→                                            | GT4+APATPase+TPR+TPR                 | 1339 | WL11_RS09715       | Betapro-<br>teobacteria  | Burkholderia<br>ubonensis         | tetratricopeptide<br>repeat protein<br>[Burkholderia<br>ubonensis]                | GCF_001530465.1 |
| WP_080436327.1 | NACHT+TPR+GT4*→                                                   | NACHT+TPR+GT4                        | 1226 | WM18_RS12015       | Betapro-<br>teobacteria  | Burkholderia<br>ubonensis         | glycosyltrans-<br>ferase<br>[Burkholderia<br>ubonensis]                           | GCF_001533745.1 |
| WP_080492181.1 | AA_permease→?→ GT4+APATPase+TPR+TPR*→                             | GT4+APATPase+TPR+TPR                 | 1293 | BGV55_RS22015      | Betapro-<br>teobacteria  | Burkholderia<br>ubonensis         | tetratricopeptide<br>repeat protein<br>[Burkholderia<br>ubonensis]                | GCF_001882545.1 |
| WP_082136219.1 | GT4+APATPase+TPR+TPR*→                                            | GT4+APATPase+TPR+TPR                 | 1282 | TR67_RS23240       | Gammapro-<br>teobacteria | Pseudomonas<br>deceptionensis     | glycosyltrans-<br>ferase<br>[Pseudomonas<br>deceptionensis]                       | GCF_900106095.1 |
| WP_082297595.1 | GT4*→                                                             | GT4                                  | 599  | AKH00_RS12250      | Actinobacte-<br>ria      | Microbacterium<br>sp. GCS4        | glycosyltrans-<br>ferase family 4<br>protein<br>[Microbacterium<br>sp. GCS4]      | GCF_001262495.1 |
| WP_082404817.1 | <-ABC_tran  ?→?→   <-?<-TIR+NACHT  HTH+APATPase+TPR+GT4*→         | HTH+APATPase+TPR+GT4                 | 1223 | ADK67_RS45530      | Actinobacte-<br>ria      | Saccharothrix sp.<br>NRRL B-16348 | glycosyltrans-<br>ferase<br>[Saccharothrix sp.<br>NRRL B-16348]                   | GCF_001280085.1 |
| WP_082466077.1 | GT4*→   <-TRPR-HTH+PBPI<-?<-?<-?<-?  ABC_tran→                    | GT4                                  | 618  | ASE64_RS17155      | Actinobacte-<br>ria      | Agreia sp.<br>Leaf210             | glycosyltrans-<br>ferase [Agreia sp.<br>Leaf210]                                  | GCF_001421485.1 |
| WP_083469142.1 | GT4+NUDIX*→                                                       | GT4+NUDIX                            | 750  | VQ02_RS35520       | Alphapro-<br>teobacteria | Methylobacterium<br>variabile     | glycosyltrans-<br>ferase family 4<br>protein [Methy-<br>lobacterium<br>variabile] | GCF_001043975.1 |
| WP_083731258.1 | Multi-TM→?→ STAND→?→ DUF4913→?→   <-?  GT4+NUDIX+ART+PolB-NTase*→ | GT4+NUDIX+ART+PolB-NTase             | 1854 | BL254_RS25375      | Actinobacte-<br>ria      | Frankia sp.<br>BMG5.30            | glycosyltrans-<br>ferase [Frankia sp.<br>BMG5.30]                                 | GCF_001983005.1 |
| WP_083895344.1 | WXG→?→?→ WXG→?→?→?→ WXG+Caspase+VWA+Papain+ZetaToxin+GT4*→        | WXG+Caspase+VWA+Papain+ZetaToxin+GT4 | 3035 | ON40_RS01890       | Actinobacte-<br>ria      | Nocardia<br>jiangxiensis          | zeta toxin family<br>protein [Nocardia<br>jiangxiensis]                           | GCF_000308615.1 |
| WP_085710134.1 | <-LexA  GT4+APATPase+TPR+TPR*→   <-?<-?<-ABC_tran                 | GT4+APATPase+TPR+TPR                 | 1389 | CAG24_RS08890      | Gammapro-<br>teobacteria | unclassified<br>Pseudomonas       | MULTISPECIES:<br>glycosyltrans-<br>ferase [unclassified<br>Pseudomonas]           | GCF_002112315.1 |
| WP_086055635.1 | DUF4913→?→   <-?  GT4+NUDIX+ART+PolB-NTase*→                      | GT4+NUDIX+ART+PolB-NTase             | 1854 | FrCorBMG51_RS27570 | Actinobacte-<br>ria      | Frankia coriariae                 | glycosyltrans-<br>ferase [Frankia<br>coriariae]                                   | -               |
| WP_086802688.1 | GT4+NUDIX+ART+PolB-NTase*→                                        | GT4+NUDIX+ART+PolB-NTase             | 1883 | CCN48_RS29200      | Actinobacte-<br>ria      | Streptomyces<br>scabiei           | glycosyltrans-<br>ferase family 4<br>protein<br>[Streptomyces<br>scabiei]         | GCF_002155725.1 |

| acc            | operon                                                                               | architecture                | len  | gen.name          | taxend              | species                     | define                                                                    | gca             |
|----------------|--------------------------------------------------------------------------------------|-----------------------------|------|-------------------|---------------------|-----------------------------|---------------------------------------------------------------------------|-----------------|
| WP_087651531.1 | GT4+Trypsin+PNPase*→                                                                 | GT4+Trypsin+PNPase          | 929  | S1001342_RS03745  | Alphaproteobacteria | Acetobacter pasteurianus    | glycosyltransferase [Acetobacter pasteurianus]                            | GCF_002173735.1 |
| WP_088088251.1 | GT4*→                                                                                | GT4                         | 624  | CCK98_RS20350     | Firmicutes          | Bacillus sp. OV166          | glycosyltransferase family 4 protein [Bacillus sp. OV166]                 | GCF_900177675.1 |
| WP_088287445.1 | GT4+APATPase+TPR+TPR*→                                                               | GT4+APATPase+TPR+TPR        | 1066 | EOIN-JALH_RS30615 | Betaproteobacteria  | Ideonella sp. A 288         | tetratricopeptide repeat protein [Ideonella sp. A 288]                    | GCF_002198735.1 |
| WP_090142138.1 | GT4*→                                                                                | GT4                         | 516  | AMM33_RS15110     | Betaproteobacteria  | Limnohabitans sp. DM1       | glycosyltransferase family 4 protein [Limnohabitans sp. DM1]              | GCF_001269385.1 |
| WP_091283948.1 | TPR+Caspase→ TPR+Caspase→   <-CATASP  CATRA-N+CATRA-C+GT4*→   <-?  HTH+APATPase+TPR→ | CATRA-N+CATRA-C+GT4         | 839  | AWX74_RS30820     | Actinobacteria      | Frankia irregularis         | glycosyltransferase family 4 protein [Frankia irregularis]                | GCF_001536285.1 |
| WP_091296338.1 | cNMP_binding+HTH_Crp_2→?→ GT4*→   <-ACYC+APATPase+TPR                                | GT4                         | 406  | BLV57_RS34110     | Actinobacteria      | Amycolatopsis xylanica      | glycosyltransferase family 4 protein [Amycolatopsis xylanica]             | GCF_900107045.1 |
| WP_091582937.1 | STAND→?→ DUF4913→   <-?<-?  ?→ GT4*→?→?→?→ NUDIX→   <-?<-ABC_tran                    | GT4                         | 438  | GA0070622_RS30350 | Actinobacteria      | Micromonospora sediminicola | glycosyltransferase family 4 protein [Micromonospora sediminicola]        | GCF_900089585.1 |
| WP_092202072.1 | ABC_tran→?→?→?→?→?→   <-?  STAND+TPR+GT4*→                                           | STAND+TPR+GT4               | 1063 | BLU85_RS18570     | Gammaproteobacteria | unclassified Pseudomonas    | MULTISPECIES: glycosyltransferase [unclassified Pseudomonas]              | GCF_900103555.1 |
| WP_092992899.1 | GT4+TPR+TPR*→                                                                        | GT4+TPR+TPR                 | 1441 | BLP65_RS04115     | Gammaproteobacteria | Thiohalomonas denitrificans | tetratricopeptide repeat protein [Thiohalomonas denitrificans]            | GCF_900102855.1 |
| WP_094198012.1 | GST_N_2+GST_C→?→   <-?<-?<-?  trRNA→ Cluster214_2clades→ GT4*→   <-?<-?<-?<-DctM     | GT4                         | 756  | AFA_RS17265       | Betaproteobacteria  | Alcaligenes faecalis        | glycosyltransferase family 4 protein [Alcaligenes faecalis]               | GCF_002242175.1 |
| WP_096772335.1 | rve+rve_3→   <-?  ?→   <-?  PSE→   <-?<-?  GT4+B12-binding+RADICAL-SAM*→             | GT4+B12-binding+RADICAL-SAM | 1313 | GGE61_RS22535     | Alphaproteobacteria | Rhizobium                   | MULTISPECIES: cobalamin B12-binding domain-containing protein [Rhizobium] | GCF_013087515.1 |

| acc            | operon                                                                 | architecture     | len  | gen.name       | taxend                | species                        | define                                                                           | gca             |
|----------------|------------------------------------------------------------------------|------------------|------|----------------|-----------------------|--------------------------------|----------------------------------------------------------------------------------|-----------------|
| WP_096876300.1 | GT4+APATPase*→                                                         | GT4+APATPase     | 888  | MKLM6_RS16005  | Gamma-<br>teobacteria | Methylomonas<br>koyamae        | glycosyltrans-<br>ferase<br>[Methylomonas<br>koyamae]                            | GCF_002441955.1 |
| WP_097325277.1 | WXG→?→ GT4*→                                                           | GT4              | 626  | CRP55_RS32890  | Actinobacte-<br>ria   | Actinoplanes<br>atrantiaicus   | glycosyltrans-<br>ferase family 4<br>protein<br>[Actinoplanes<br>atrantiaicus]   | GCF_900215205.1 |
| WP_097329102.1 | wHTH+TPR+APATPase→?→?→   <-?  GT4*→   <-?  ?→?→?→?→   <-?<-WXG+Caspase | GT4              | 510  | CRP55_RS49635  | Actinobacte-<br>ria   | Actinoplanes<br>atrantiaicus   | glycosyltrans-<br>ferase family 4<br>protein<br>[Actinoplanes<br>atrantiaicus]   | GCF_900215205.1 |
| WP_097811834.1 | GT4*→                                                                  | GT4              | 600  | CN930_RS12860  | Firmicutes            | Bacillus cereus                | [Actinoplanes<br>atrantiaicus]<br>glycosyltrans-<br>ferase [Bacillus<br>cereus]  | GCF_002574885.1 |
| WP_097931751.1 | <-DNA_methylase  ?→?→?→?→?→   <-?  MNS+GT4*→                           | MNS+GT4          | 1170 | CR483_RS02605  | Actinobacte-<br>ria   | unclassified<br>Streptomyces   | MULTISPECIES:<br>glycosyltrans-<br>ferase [unclassified<br>Streptomyces]         | GCF_002551215.1 |
| WP_098141735.1 | GT4*→?→?→?→?→?→ NLPC→                                                  | GT4              | 541  | CN671_RS19510  | Firmicutes            | Bacillus<br>toyonensis         | glycosyltrans-<br>ferase [Bacillus<br>toyonensis]                                | GCF_012395365.1 |
| WP_098743858.1 | STAND→?→ DUF4913→   <-?<-?  ?→ GT4*→?→?→?→ NUDIX→   <-?<-ABC_tran      | GT4              | 438  | COO58_RS03965  | Actinobacte-<br>ria   | Micromonospora<br>sp. WMMA1996 | glycosyltrans-<br>ferase family 4<br>protein<br>[Micromonospora<br>sp. WMMA1996] | GCF_002573675.1 |
| WP_099013704.1 | MNS+GT4*→                                                              | MNS+GT4          | 1149 | SMALA_RS12770  | Actinobacte-<br>ria   | Streptomyces<br>malaysiensis   | AAA family<br>ATPase<br>[Streptomyces<br>malaysiensis]                           | GCF_002591335.1 |
| WP_100783315.1 | MFS→   <-?  GT4+APATPase+TPR*→   <-MODE-HTH+PBPII                      | GT4+APATPase+TPR | 1318 | COO64_RS24546  | Gamma-<br>teobacteria | Pseudomonas<br>donghuensis     | glycosyltrans-<br>ferase<br>[Pseudomonas<br>donghuensis]                         | GCF_002811135.1 |
| WP_101210325.1 | GT4*→ TPR→                                                             | GT4              | 541  | AT251_RS15815  | Gamma-<br>teobacteria | Enterovibrio<br>nigricans      | hypothetical<br>protein<br>[Enterovibrio<br>nigricans]                           | -               |
| WP_101386266.1 | -                                                                      | -                | 1324 | -              | Actinobacte-<br>ria   | Streptomyces sp.<br>TLI_146    | caspace family<br>protein<br>[Streptomyces sp.<br>TLI_146]                       | -               |
| WP_101718466.1 | <-ABC_tran<-?<-?<-?<-PSE<-?  ?→?→ GT4*→                                | GT4              | 612  | SGCZBJ_RS13250 | Gamma-<br>teobacteria | Caulobacter zeae               | glycosyltrans-<br>ferase<br>[Caulobacter zeae]                                   | GCF_002858925.1 |

| acc            | operon                                                      | architecture                  | len  | gen.name      | taxend               | species                  | define                                                          | gca             |
|----------------|-------------------------------------------------------------|-------------------------------|------|---------------|----------------------|--------------------------|-----------------------------------------------------------------|-----------------|
| WP_102909088.1 | NUDIX→?→ GT4*→                                              | GT4                           | 433  | C1J00_RS12325 | Actinobacteria       | Streptomyces sp. 13K301  | glycosyltransferase family 4 protein [Streptomyces sp. 13K301]  | GCF_002891435.1 |
| WP_103291295.1 | SWACOS+GT4*→?→    <-?<-?  MFS→                              | SWACOS+GT4                    | 1138 | C1633_RS27595 | Gamma-proteobacteria | Pseudomonas protegens    | glycosyltransferase [Pseudomonas protegens]                     | GCF_002899905.1 |
| WP_103660162.1 | NACHT+GT4*→                                                 | NACHT+GT4                     | 1646 | CPJ18_RS23160 | Alphaproteobacteria  | Agrobacterium rosae      | glycosyltransferase [Agrobacterium rosae]                       | GCF_002915175.1 |
| WP_104365810.1 | GT4*→                                                       | GT4                           | 428  | C5E51_RS10910 | Actinobacteria       | Nocardia nova            | glycosyltransferase family 4 protein [Nocardia nova]            | GCF_002933545.1 |
| WP_105007055.1 | GT4*→?→    <-PSE  ?→?→ Calcineurin→                         | GT4                           | 606  | CUJ84_RS16890 | Alphaproteobacteria  | Rhizobium leguminosarum  | glycosyltransferase family 4 protein [Rhizobium leguminosarum]  | GCF_002953715.1 |
| WP_106119969.1 | Cluster214_2clades→ GT4*→                                   | GT4                           | 736  | C7A11_RS23785 | Gamma-proteobacteria | Pseudomonas simiae       | glycosyltransferase family 4 protein [Pseudomonas simiae]       | GCF_003001535.1 |
| WP_107027343.1 | NACHT+GT4*→    <-?<-?  PSE→ TIR→                            | NACHT+GT4                     | 1646 | C6558_RS13435 | Alphaproteobacteria  | Ensifer sp. NM-2         | glycosyltransferase [Ensifer sp. NM-2]                          | GCF_003024455.1 |
| WP_107161461.1 | GT4+NACHT+BetaPropeller*→                                   | GT4+NACHT+BetaPropeller       | 1536 | C8054_RS26470 | Actinobacteria       | Micromonospora sp. RP3T  | glycosyltransferase [Micromonospora sp. RP3T]                   | GCF_003027925.1 |
| WP_107259933.1 | nSTAND3→?→?→ GT4*→    <-?<-?  ?→    <-?  ?→ PSE→    <-NUDIX | GT4                           | 596  | C6W10_RS21380 | Actinobacteria       | Plantactinospora sp. BB1 | glycosyltransferase family 4 protein [Plantactinospora sp. BB1] | GCF_003030385.1 |
| WP_107266333.1 | nSTAND3→?→?→ GT4*→                                          | GT4                           | 596  | C6361_RS00275 | Actinobacteria       | Plantactinospora sp. BC1 | glycosyltransferase [Plantactinospora sp. BC1]                  | GCF_003030345.1 |
| WP_107402046.1 | Multi-TM→?→ STAND→?→ DUF4913→?→ GT4*→ Zeta_toxin→           | GT4                           | 374  | AN216_RS27375 | Actinobacteria       | Streptomyces oceani      | glycosyltransferase [Streptomyces oceani]                       | GCF_001751245.1 |
| WP_107867044.1 | LRR+LRR+LRR+AP-GTPase+COR+GT4*→                             | LRR+LRR+LRR+AP-GTPase+COR+GT4 | 1510 | C8N29_RS15840 | Firmicutes           | Agitococcus lubricus     | leucine-rich repeat protein [Agitococcus lubricus]              | GCF_003051055.1 |



| acc            | operon                                                           | architecture                | len  | gen.name      | taxend              | species                     | define                                                             | gca             |
|----------------|------------------------------------------------------------------|-----------------------------|------|---------------|---------------------|-----------------------------|--------------------------------------------------------------------|-----------------|
| WP_108006164.1 | <-HTH+APATPase+TPR  GT4*→?→    <-?<-?<-?  TPR→                   | GT4                         | 421  | C7821_RS00535 | Actinobacteria      | Streptomyces sp. VMFN-G11Ma | glycosyltransferase family 4 protein [Streptomyces sp. VMFN-G11Ma] | GCF_003046555.1 |
| WP_108666907.1 | NLPC→?→?→?→    <-?  GT4*→                                        | GT4                         | 564  | CUC05_RS14855 | Actinobacteria      | Euzebya rosea               | glycosyltransferase family 4 protein [Euzebya rosea]               | GCF_003073135.1 |
| WP_109448176.1 | MPTase+GT4*→                                                     | MPTase+GT4                  | 753  | CK485_RS28700 | Actinobacteria      | Streptomyces sp. ICBB 8177  | DUF4157 domain-containing protein [Streptomyces sp. ICBB 8177]     | GCF_003144095.1 |
| WP_112357576.1 | GT4*→                                                            | GT4                         | 628  | DTY03_RS10803 | Alphaproteobacteria | Rhizobiales bacterium       | glycosyltransferase family 4 protein [Rhizobiales bacterium]       | -               |
| WP_112733881.1 | GT4+APATPase+TPR*→                                               | GT4+APATPase+TPR            | 1361 | ONO86_RS28911 | Actinobacteria      | Micromonospora noduli       | glycosyltransferase [Micromonospora noduli]                        | GCF_003264435.1 |
| WP_113016426.1 | HTH+MPTase→    <-?<-?<-?  GT4+B12-binding+RADICAL-SAM*→          | GT4+B12-binding+RADICAL-SAM | 1381 | DUD68_RS27091 | Alphaproteobacteria | Rhizobiales bacterium       | radical SAM protein [Rhizobiales bacterium]                        | -               |
| WP_113272579.1 | HTH+MPTase→?→ Helicase_C→ SIG+DUF1998→    <-?<-?  ?→ NACHT+GT4*→ | NACHT+GT4                   | 1640 | DUJ98_RS17735 | Alphaproteobacteria | Rhizobiales bacterium       | glycosyltransferase [Rhizobiales bacterium]                        | -               |
| WP_114055463.1 | TIR+APATPase+GT4*→                                               | TIR+APATPase+GT4            | 775  | C0216_RS13195 | Actinobacteria      | Streptomyces globosus       | TIR domain-containing protein [Streptomyces globosus]              | GCF_003325375.1 |
| WP_114396907.1 | GT4*→                                                            | GT4                         | 529  | DEF24_RS15180 | Actinobacteria      | Maritenerispora sediminis   | glycosyltransferase family 4 protein [Maritenerispora sediminis]   | GCF_003336445.1 |
| WP_116211561.1 | NACHT→ GT4*→                                                     | GT4                         | 406  | DXZ73_RS15355 | Actinobacteria      | Streptomyces olivoreticuli  | glycosyltransferase family 4 protein [Streptomyces olivoreticuli]  | GCF_003391135.1 |
| WP_116568912.1 | GT4*→?→    <-?<-?  ?→    <-?<-MODE-HTH+PBPII                     | GT4                         | 612  | DDF65_RS17385 | Alphaproteobacteria | Caulobacter radialis        | glycosyltransferase [Caulobacter radialis]                         | GCF_003094595.1 |

| acc            | operon                                                                                       | architecture                  | len  | gen.name       | taxend               | species                           | define                                                                   | gca             |
|----------------|----------------------------------------------------------------------------------------------|-------------------------------|------|----------------|----------------------|-----------------------------------|--------------------------------------------------------------------------|-----------------|
| WP_120733613.1 | GT4+B12-binding+RADICAL-SAM*→                                                                | GT4+B12-binding+RADICAL-SAM   | 1400 | D7M10_RS181330 | Gamma-proteobacteria | <i>Pseudomonas fluorescens</i>    | radical SAM protein [Pseudomonas fluorescens]                            | GCF_003626995.1 |
| WP_120967974.1 | GT4+APATPase+TPR+TPR*→                                                                       | GT4+APATPase+TPR+TPR          | 1425 | EAO39_RS12970  | Beta-proteobacteria  | <i>Comamonas sp. lk</i>           | tetratricopeptide repeat protein [Comamonas sp. lk]                      | GCF_900564145.1 |
| WP_121165351.1 | Sigma→?→?→?→?→ LRR+LRR+LRR+AP-GTPase+COR+GT4*→                                               | LRR+LRR+LRR+AP-GTPase+COR+GT4 | 1488 | B0H84_RS06470  | Beta-proteobacteria  | <i>Nitrosomonas sp. Nm120</i>     | leucine-rich repeat domain-containing protein [Nitrosomonas sp. Nm120]   | GCF_003664085.1 |
| WP_121799508.1 | Multi-TM→?→ STAND→?→ DUF4913→?→ GT4*→                                                        | GT4                           | 488  | CTZ27_RS14745  | Actinobacteria       | <i>Streptomyces griseocarneus</i> | glycosyltransferase family 4 protein [Streptomyces griseocarneus]        | GCF_003674045.1 |
| WP_122257475.1 | GT4+B12-binding+RADICAL-SAM*→                                                                | GT4+B12-binding+RADICAL-SAM   | 1421 | ALP97_05253    | Gamma-proteobacteria | <i>Pseudomonas salomonii</i>      | radical SAM protein [Pseudomonas salomonii]                              | -               |
| WP_122528181.1 | STAND+TPR+GT4*→                                                                              | STAND+TPR+GT4                 | 1067 | EE945_RS06325  | Gamma-proteobacteria | <i>Pseudomonas viridiflava</i>    | glycosyltransferase [Pseudomonas viridiflava]                            | GCF_900580695.1 |
| WP_123299261.1 | GT4+B12-binding+RADICAL-SAM*→   <?  ?→?→   <?<?<?<?  MODE-HTH+PBPII→                         | GT4+B12-binding+RADICAL-SAM   | 1405 | EC845_RS16630  | Beta-proteobacteria  | <i>Comamonas sp. BIGb0124</i>     | cobalamin B12-binding domain-containing protein [Comamonas sp. BIGb0124] | GCF_003752175.1 |
| WP_123439297.1 | <-TPR+Caspase<-CATASP  CATRA-N+CATRA-C+GT4*→ HTH+APATPase+TPR→   <-HTH  ?→?→?→   <-?<-CATASP | CATRA-N+CATRA-C+GT4           | 694  | EDD94_RS26400  | Actinobacteria       | <i>Streptomyces sp. PanSC9</i>    | glycosyltransferase family 4 protein [Streptomyces sp. PanSC9]           | GCF_003751985.1 |
| WP_124130642.1 | STAND+GT4*→                                                                                  | STAND+GT4                     | 1082 | CJU35_RS32065  | Gamma-proteobacteria | <i>Pseudomonas aeruginosa</i>     | glycosyltransferase [Pseudomonas aeruginosa]                             | GCF_901482505.1 |
| WP_124284015.1 | NUDIX→?→   <?  ?→ MNS+GT4*→                                                                  | MNS+GT4                       | 1151 | EES39_RS04745  | Actinobacteria       | <i>Streptomyces sp. ADI92-24</i>  | glycosyltransferase [Streptomyces sp. ADI92-24]                          | GCF_003846195.1 |
| WP_124458549.1 | STAND+TPR+GT4*→   <?<?<?  Calcineurin→                                                       | STAND+TPR+GT4                 | 1054 | DBV14_RS07405  | Beta-proteobacteria  | <i>Variovorax sp. KBW07</i>       | glycosyltransferase [Variovorax sp. KBW07]                               | GCF_003852515.1 |

| acc            | operon                                                                                                                     | architecture                               | len  | gen.name        | taxend               | species                          | define                                                                          | gca             |
|----------------|----------------------------------------------------------------------------------------------------------------------------|--------------------------------------------|------|-----------------|----------------------|----------------------------------|---------------------------------------------------------------------------------|-----------------|
| WP_125624986.1 | Multi-TM→?→ STAND→?→ DUF4913→?→ GT4*→?→ Zeta_toxin→   <-ABC_tran                                                           | GT4                                        | 547  | DMH02_RS17910   | Actinobacteria       | Streptomyces sp. WAC 00631       | glycosyltransferase family 4 protein [Streptomyces sp. WAC 00631]               | GCF_003947265.1 |
| WP_125642507.1 | MNS+GT4*→                                                                                                                  | MNS+GT4                                    | 1274 | EF918_07135     | Actinobacteria       | Streptomyces sp. WAC06614        | glycosyltransferase [Streptomyces sp. WAC06614]                                 | -               |
| WP_125650904.1 | Caspase+NACHT+GT4*→                                                                                                        | Caspase+NACHT+GT4                          | 1208 | EF918_25550     | Actinobacteria       | Streptomyces sp. WAC06614        | glycosyltransferase [Streptomyces sp. WAC06614]                                 | -               |
| WP_125870434.1 | GT4+B12-binding+RADICAL-SAM*→                                                                                              | GT4+B12-binding+RADICAL-SAM                | 1426 | EGJ08_07220     | Gamma-proteobacteria | Pseudomonas stutzeri             | radical SAM protein [Pseudomonas stutzeri]                                      | -               |
| WP_125995743.1 | NACHT+GT4*→                                                                                                                | NACHT+GT4                                  | 1650 | BRX43_RS14143   | Alphaproteobacteria  | Sphingomonas sp. S-NIH.Pt15_0812 | glycosyltransferase [Sphingomonas sp. S-NIH.Pt15_0812]                          | GCF_003951315.1 |
| WP_127872272.1 | NACHT+GT4*→   <-Vsr                                                                                                        | NACHT+GT4                                  | 1637 | EN845_RS20190   | Alphaproteobacteria  | unclassified Mesorhizobium       | MULTISPECIES: glycosyltransferase family 4 protein [unclassified Mesorhizobium] | -               |
| WP_128145588.1 | MPTase→ WXG+SecA→?→?→ GT4+TetR-HTH+TetR-HTH+Tox-ART-RSE+LuxR-HTH*→?→?→ ABhydrolase→                                        | GT4+TetR-HTH+TetR-HTH+Tox-ART-RSE+LuxR-HTH | 2725 | NCTC13184_06625 | Actinobacteria       | Nocardia africana                | glycosyltransferase [Nocardia africana]                                         | -               |
| WP_129557405.1 | <-TnpB_IS66<-HTH_Tnp_1  ?→ SIG+GT4→ GT4→<br>tRNA→   <-?<-PSE  ?→   <-?<-PSE<-?<-?  Calcineurin→   <-cNMP_binding+HTH_Crp_2 | SIG+GT4                                    | 316  | NK6_RS51120     | Alphaproteobacteria  | Bradyrhizobium diazoefficiens    | glycosyltransferase [Bradyrhizobium diazoefficiens]                             | GCF_001549695.1 |
| WP_130174915.1 | GT4+B12-binding+RADICAL-SAM*→                                                                                              | GT4+B12-binding+RADICAL-SAM                | 1409 | EUX58_RS06686   | Gamma-proteobacteria | Pseudomonas                      | MULTISPECIES: radical SAM protein [Pseudomonas]                                 | GCF_005930695.1 |
| WP_130264935.1 | GT4+APATPase+TPR+TPR*→   <-MODE-HTH+PBPII                                                                                  | GT4+APATPase+TPR+TPR                       | 1330 | EXN22_RS15726   | Gamma-proteobacteria | Pseudomonas sp. SNU WT1          | glycosyltransferase family 4 protein [Pseudomonas sp. SNU WT1]                  | GCF_004214895.1 |
| WP_130343732.1 | WXG+TM+EDA39C+Papain+Caspase+GT4*→?→ GT4→                                                                                  | WXG+TM+EDA39C+Papain+Caspase+GT4           | 2616 | EV193_RS09710   | Actinobacteria       | Herbihabitans rhizosphaerae      | glycosyltransferase [Herbihabitans rhizosphaerae]                               | GCF_004216555.1 |
| WP_130721989.1 | CASPASE→?→?→?→ GT4*→                                                                                                       | GT4                                        | 606  | ELI52_RS15625   | Alphaproteobacteria  | Rhizobium leguminosarum          | glycosyltransferase [Rhizobium leguminosarum]                                   | GCF_004303135.1 |

| acc            | operon                                                                                                     | architecture                     | len  | gen.name      | taxend              | species                        | define                                                            | gca             |
|----------------|------------------------------------------------------------------------------------------------------------|----------------------------------|------|---------------|---------------------|--------------------------------|-------------------------------------------------------------------|-----------------|
| WP_131447141   | Ribosomal_L20<-?<-?<-?<-tRNA  ?>    <-?<-?<-PSE  APATPase+GT4+TPR+TPR+TPR+TPR+TPR*->    <-?  ?> ABC_tran-> | APATPase+GT4+TPR+TPR+TPR+TPR+TPR | 1789 | EZJ19_RS09965 | Betaproteobacteria  | Thiobacillaceae bacterium LSR1 | tetratricopeptide repeat protein [Thiobacillaceae bacterium LSR1] | GCF_004337445.1 |
| WP_131728683.1 | GT4+STAND+TPR+TPR*->                                                                                       | GT4+STAND+TPR+TPR                | 1465 | AOZ47_RS33140 | Betaproteobacteria  | Achromobacter xylosoxidans     | tetratricopeptide repeat protein [Achromobacter xylosoxidans]     | GCF_001299055.1 |
| WP_131738585.1 | <-VWA+APATPase+TPR+TPR+TPR+TPR<-STAND<-?  GT4*->?>    <-?  MFS->                                           | GT4                              | 696  | E1291_RS15920 | Actinobacteria      | Actinomadura roseirufa         | glycosyltransferase family 4 protein [Actinomadura roseirufa]     | GCF_900659635.1 |
| WP_131761874.1 | <-cNMP_binding+HTH_Crp_2  GT4*->    <-HTH+APATPase+TPR  ?>    <-cNMP_binding+HTH_Crp_2                     | GT4                              | 466  | E1300_RS37495 | Actinobacteria      | Actinomadura fibrosa           | glycosyltransferase family 4 protein [Actinomadura fibrosa]       | GCF_900659615.1 |
| WP_132113254.1 | GT4*->    <-TPR                                                                                            | GT4                              | 404  | EV192_RS08750 | Actinobacteria      | Actinocrispum wychmicini       | glycosyltransferase family 4 protein [Actinocrispum wychmicini]   | GCF_004345645.1 |
| WP_132114377.1 | cNMP_binding+HTH_Crp_2-> GT4*->    <-ACYC+APATPase+TPR                                                     | GT4                              | 407  | EV192_RS12015 | Actinobacteria      | Actinocrispum wychmicini       | glycosyltransferase family 4 protein [Actinocrispum wychmicini]   | GCF_004345645.1 |
| WP_132118129.1 | EAD1+fvmYukDl-Nterm+GT4*->                                                                                 | EAD1+fvmYukDl-Nterm+GT4          | 667  | EV192_RS21815 | Actinobacteria      | Actinocrispum wychmicini       | glycosyltransferase family 4 protein [Actinocrispum wychmicini]   | GCF_004345645.1 |
| WP_132175767.1 | GT4*->                                                                                                     | GT4                              | 453  | E1263_RS36055 | Actinobacteria      | Kribbella antibiotica          | glycosyltransferase family 4 protein [Kribbella antibiotica]      | GCF_004349055.1 |
| WP_132323823.1 | GT4*->                                                                                                     | GT4                              | 446  | E1218_RS23930 | Actinobacteria      | Kribbella sp. 16K104           | glycosyltransferase family 4 protein [Kribbella sp. 16K104]       | GCF_004348725.1 |
| WP_133190629.1 | GT4+B12-binding+RADICAL-SAM*->                                                                             | GT4+B12-binding+RADICAL-SAM      | 1398 | E1N52_RS41050 | Betaproteobacteria  | Paraburkholderia guartelaensis | radical SAM protein [Paraburkholderia guartelaensis]              | GCF_004353905.1 |
| WP_133255578.1 | <-MODE-HTH+PBPII  ?>    <-MODE-HTH+PBPII  ?>?>?>?> NACHT+GT4*->                                            | NACHT+GT4                        | 1640 | CPJ17_RS11090 | Alphaproteobacteria | Rhizobium tumorigenes          | glycosyltransferase [Rhizobium tumorigenes]                       | GCF_003240565.1 |

| acc            | operon                                                                                                                              | architecture                | len  | gen.name      | taxend               | species                      | define                                                              | gca             |
|----------------|-------------------------------------------------------------------------------------------------------------------------------------|-----------------------------|------|---------------|----------------------|------------------------------|---------------------------------------------------------------------|-----------------|
| WP_133739590.1 | STAND→?→?→ DUF4913→    <-AbiEii<-AbiEi_4  ?→ GT4*→                                                                                  | GT4                         | 493  | EV190_RS01575 | Actinobacteria       | Actinorugispora endophytica  | glycosyltransferase family 4 protein [Actinorugispora endophytica]  | GCF_004363075.1 |
| WP_133854316.1 | Helicase_C→ SIG+DUF1998→    <-?  ?→?→    <-?  ?→ GT4→ TIR+APATPase+TPR→ TPR+Caspase→    <-TPR+Caspase<-CATASP  CATRA-N+CATRA-C+GT4→ | GT4                         | 423  | EV186_RS37520 | Actinobacteria       | Labedaea rhizosphaerae       | glycosyltransferase family 4 protein [Labedaea rhizosphaerae]       | GCF_004362825.1 |
| WP_133925636.1 | GT4*→                                                                                                                               | GT4                         | 622  | EV573_RS04015 | Actinobacteria       | Streptomyces sp. BK161       | glycosyltransferase [Streptomyces sp. BK161]                        | GCF_004364215.1 |
| WP_133927416.1 | SWACOS+GT4*→    <-?<-?  ?→    <-?<-?<-ABC_tran                                                                                      | SWACOS+GT4                  | 1159 | EV573_RS13335 | Actinobacteria       | Streptomyces sp. BK161       | glycosyltransferase [Streptomyces sp. BK161]                        | GCF_004364215.1 |
| WP_133932223.1 | <-Sigma<-?<-TPR  GT4*→                                                                                                              | GT4                         | 410  | EV573_RS39315 | Actinobacteria       | Streptomyces sp. BK161       | glycosyltransferase family 4 protein [Streptomyces sp. BK161]       | GCF_004364215.1 |
| WP_134939719.1 | GT4+B12-binding+RADICAL-SAM*→                                                                                                       | GT4+B12-binding+RADICAL-SAM | 1421 | BZ164_RS25605 | Gamma-proteobacteria | Pseudomonas veronii          | radical SAM protein [Pseudomonas veronii]                           | -               |
| WP_135904996.1 | <-Vsr  ?→?→?→    <-?<-?  GT4+Trypsin+PNPase*→                                                                                       | GT4+Trypsin+PNPase          | 836  | EN818_RS17550 | Alphaproteobacteria  | unclassified Mesorhizobium   | MULTISPECIES: glycosyltransferase [unclassified Mesorhizobium]      | -               |
| WP_136526013.1 | SWACOS+GT4*→                                                                                                                        | SWACOS+GT4                  | 1144 | E8L22_RS15545 | Deltaproteobacteria  | Geomonas ferrireducens       | glycosyltransferase [Geomonas ferrireducens]                        | -               |
| WP_136738577.1 | GT4*→                                                                                                                               | GT4                         | 394  | FCH28_RS05590 | Actinobacteria       | Streptomyces sp. jys28       | glycosyltransferase family 4 protein [Streptomyces sp. jys28]       | GCF_005048155.1 |
| WP_136743126.1 | MNS+GT4*→                                                                                                                           | MNS+GT4                     | 1188 | FCH28_RS29075 | Actinobacteria       | Streptomyces sp. jys28       | glycosyltransferase [Streptomyces sp. jys28]                        | GCF_005048155.1 |
| WP_138637396.1 | NUDIX→?→ GT4*→                                                                                                                      | GT4                         | 432  | ETD96_RS16755 | Actinobacteria       | Actinomadura geliboluenensis | glycosyltransferase family 4 protein [Actinomadura geliboluenensis] | GCF_005889745.1 |
| WP_141100843.1 | GT4+HD*→                                                                                                                            | GT4+HD                      | 1421 | CDN99_RS17245 | Betaproteobacteria   | Roseateles aquatilis         | HD domain-containing protein [Roseateles aquatilis]                 | GCF_002205645.1 |

| acc            | operon                                                                                                | architecture                  | len  | gen.name          | taxend              | species                      | define                                                             | gca             |
|----------------|-------------------------------------------------------------------------------------------------------|-------------------------------|------|-------------------|---------------------|------------------------------|--------------------------------------------------------------------|-----------------|
| WP_141569577.1 | ZetaToxin+GT4+NUDIX+ART+NTase*→?→?→?→   <-Caspase                                                     | ZetaToxin+GT4+NUDIX+ART+NTase | 2159 | SipoB123_RS12946  | Actinobacteria      | Streptomyces ipomoeae        | zeta toxin family protein [Streptomyces ipomoeae]                  | GCF_006547165.1 |
| WP_141585352.1 | ZetaToxin+GT4+NUDIX+ART+NTase*→?→?→?→   <-Caspase<-?  ?→ PSE→   <-NLPC                                | ZetaToxin+GT4+NUDIX+ART+NTase | 2156 | Sipo7851_RS16610  | Actinobacteria      | Streptomyces ipomoeae        | zeta toxin family protein [Streptomyces ipomoeae]                  | GCF_006547175.1 |
| WP_141714270.1 | <-TPR+Caspase  GT4*→                                                                                  | GT4                           | 542  | GA0074694_RS24775 | Actinobacteria      | Micromonospora inyonensis    | glycosyltransferase [Micromonospora inyonensis]                    | GCF_900091415.1 |
| WP_141749885.1 | GT4+NACHT*→   <-MFS                                                                                   | GT4+NACHT                     | 1197 | JAB9_RS27490      | Betaproteobacteria  | Janthinobacterium sp. HH107  | glycosyltransferase family 4 protein [Janthinobacterium sp. HH107] | GCF_001758765.1 |
| WP_141888935.1 | MFS→   <-ABC_tran<-?<-?<-?<-?  GT4*→                                                                  | GT4                           | 608  | FB468_RS16790     | Actinobacteria      | Leucobacter komagatae        | glycosyltransferase [Leucobacter komagatae]                        | GCF_006716085.1 |
| WP_141962659.1 | K-HTH+APATPase+TPR<-TPR+Caspase<-CATASP  CATRA-N+CATRA-C+GT4*→   <-?<-?<-?<-?<-?<-?<-REase+SFI-ATPase | CATRA-N+CATRA-C+GT4           | 732  | FB559_RS39205     | Actinobacteria      | Actinoallomurus bryophytorum | glycosyltransferase [Actinoallomurus bryophytorum]                 | GCF_006716425.1 |
| WP_142260239.1 | MNS+GT4*→?→   <-?<-Sigma<-?  ABC_tran→                                                                | MNS+GT4                       | 1152 | FHX40_RS15230     | Actinobacteria      | Thermopolyspora flexuosa     | glycosyltransferase [Thermopolyspora flexuosa]                     | GCF_014647775.1 |
| WP_142588942.1 | NACHT+GT4*→                                                                                           | NACHT+GT4                     | 1640 | HNP80_RS07130     | Alphaproteobacteria | Rhizobium halotolerans       | glycosyltransferase [Rhizobium halotolerans]                       | GCF_902153235.2 |
| WP_143026968.1 | LRR+AP-GTPase+COR→ GT4*→                                                                              | GT4                           | 484  | BMY41_RS11080     | Betaproteobacteria  | Nitrosomonas oligotropha     | glycosyltransferase [Nitrosomonas oligotropha]                     | GCF_900106555.1 |
| WP_143176277.1 | AA_permease→?→ GT4+APATPase+TPR+TPR*→                                                                 | GT4+APATPase+TPR+TPR          | 1172 | BGV47_RS35370     | Betaproteobacteria  | Burkholderia ubonensis       | tetratricopeptide repeat protein, partial [Burkholderia ubonensis] | GCF_001901485.1 |
| WP_143660221.1 | <-TPR+Caspase<-CATASP  CATRA-N+CATRA-C+GT4*→ HTH+APATPase+TPR→   <-HTH  ?→?→?→   <-?<-CATASP          | CATRA-N+CATRA-C+GT4           | 703  | DDV98_RS32255     | Actinobacteria      | unclassified Streptomyces    | MULTISPECIES: glycosyltransferase [unclassified Streptomyces]      | GCF_001983595.1 |
| WP_143740316.1 | <-TPR+Caspase  GT4*→?→?→   <-?<-?<-ABC_tran                                                           | GT4                           | 546  | GA0070618_RS24540 | Actinobacteria      | Micromonospora echinospora   | glycosyltransferase [Micromonospora echinospora]                   | GCF_900091495.1 |

| acc            | operon                                                                                                                                                                                                                     | architecture                                                                                                                                                                                                 | len   | gen.name      | taxend                  | species                         | define                                                        | gca             |
|----------------|----------------------------------------------------------------------------------------------------------------------------------------------------------------------------------------------------------------------------|--------------------------------------------------------------------------------------------------------------------------------------------------------------------------------------------------------------|-------|---------------|-------------------------|---------------------------------|---------------------------------------------------------------|-----------------|
| WP_143788398.1 | STAND+TPR+GT4*→                                                                                                                                                                                                            | STAND+TPR+GT4                                                                                                                                                                                                | 1136  | BUS12_RS18573 | Betapro-<br>teobacteria | Paraburkholderia<br>phenazinium | glycosyltrans-<br>ferase<br>[Paraburkholderia<br>phenazinium] | GCF_900142845.1 |
| WP_143860247.1 | WXG+MPTase→ WXG+SecA+LuxR-HTH+LuxR-HTH+LuxR-HTH+LuxR-HTH+ST-Hiskin+MPTase+GT4+TetR-HTH+TetR-<br>HTH+Tox-ART-RSE+LuxR-HTH+LuxR-HTH+LuxR-HTH+GNT-RHTH+LuxR-HTH+LuxR-HTH+ST-Hiskin+ST-Hiskin+XPC-<br>C+TM+TM+TM+TM+LuxR-HTH*→ | WXG+SecA+LuxR-HTH+LuxR-HTH+LuxR-HTH+LuxR-HTH+ST-Hiskin+MPTase+GT4+TetR-HTH+TetR-<br>HTH+Tox-ART-RSE+LuxR-HTH+LuxR-HTH+LuxR-HTH+GNT-RHTH+LuxR-HTH+LuxR-HTH+ST-Hiskin+ST-<br>Hiskin+XPC-C+TM+TM+TM+TM+LuxR-HTH | 11649 | B7C42_RS30150 | Actinobacte-<br>ria     | Nocardia<br>cerradoensis        | MFS transporter,<br>partial [Nocardia<br>cerradoensis]        | GCF_002236815.1 |
| WP_144299077.1 | GT4+B12-binding+RADICAL-SAM*→                                                                                                                                                                                              | GT4+B12-binding+RADICAL-SAM                                                                                                                                                                                  | 1385  | VARPA_RS03313 | Betapro-<br>teobacteria | Variovorax<br>paradoxus         | radical SAM<br>protein<br>[Variovorax<br>paradoxus]           | GCF_000184745.1 |
| WP_144384941.1 | Multi-TM→?→ STAND→?→ DUF4913→?→ GT4*→                                                                                                                                                                                      | GT4                                                                                                                                                                                                          | 497   | CD790_RS21520 | Actinobacte-<br>ria     | Streptomyces sp.<br>SAJ15       | glycosyltrans-<br>ferase<br>[Streptomyces sp.<br>SAJ15]       | GCF_007595705.1 |
| WP_145763552.1 | NUDIX→?→ MNS+GT4*→                                                                                                                                                                                                         | MNS+GT4                                                                                                                                                                                                      | 1151  | FHX80_RS07940 | Actinobacte-<br>ria     | Streptomyces<br>brevispora      | glycosyltrans-<br>ferase<br>[Streptomyces<br>brevispora]      | GCF_007829885.1 |
| WP_145809941.1 | MNS+GT4*→?→?→   <-?  ?→ CSD→                                                                                                                                                                                               | MNS+GT4                                                                                                                                                                                                      | 1180  | FHW51_RS26100 | Actinobacte-<br>ria     | Streptomyces<br>argenteolus     | glycosyltrans-<br>ferase<br>[Streptomyces<br>argenteolus]     | GCF_007829855.1 |
| WP_145818563.1 | <-TPR+Caspase  GT4*→?→   <-?<-?<-ABC_tran                                                                                                                                                                                  | GT4                                                                                                                                                                                                          | 546   | JD81_RS15875  | Actinobacte-<br>ria     | Micromonospora<br>sagamiensis   | glycosyltrans-<br>ferase<br>[Micromonospora<br>sagamiensis]   | GCF_014680085.1 |
| WP_145835614.1 | <-TPR+Caspase  GT4*→                                                                                                                                                                                                       | GT4                                                                                                                                                                                                          | 546   | JD80_RS20680  | Actinobacte-<br>ria     | Micromonospora<br>echinospora   | glycosyltrans-<br>ferase<br>[Micromonospora<br>echinospora]   | GCF_007829475.1 |
| WP_145885265.1 | ABhydrolase→   <-?<-?  ?→   <-?  ?→?→ MNS+GT4*→                                                                                                                                                                            | MNS+GT4                                                                                                                                                                                                      | 1144  | FB157_RS37885 | Actinobacte-<br>ria     | Streptomyces sp.<br>BK340       | glycosyltrans-<br>ferase<br>[Streptomyces sp.<br>BK340]       | GCF_007827595.1 |
| WP_145921569.1 | WXG+TM+GT4+GT4*→                                                                                                                                                                                                           | WXG+TM+GT4+GT4                                                                                                                                                                                               | 3484  | FJK98_RS27630 | Actinobacte-<br>ria     | Micromonospora<br>sp. HM134     | glycosyltrans-<br>ferase<br>[Micromonospora<br>sp. HM134]     | GCF_007833915.1 |
| WP_146161220   | WXG+MPTase→ WXG+LuxR-HTH+LuxR-HTH+LuxR-HTH+LuxR-HTH+TetR-HTH+TetR-HTH+LuxR-HTH+LuxR-HTH+LexA-<br>HTH+LuxR-HTH+LuxR-HTH+LuxR-HTH+LuxR-HTH+LuxR-HTH+PP2C*→?→<br>ABhydrolase→                                                 | WXG+LuxR-HTH+LuxR-HTH+LuxR-HTH+LuxR-HTH+TetR-HTH+TetR-HTH+LuxR-HTH+LuxR-HTH+LexA-<br>HTH+LuxR-HTH+LuxR-HTH+LuxR-HTH+LuxR-HTH+LuxR-HTH+PP2C                                                                   | 14195 | C8258_RS13420 | Actinobacte-<br>ria     | Nocardia sp.<br>MDA0666         | MFS transporter<br>[Nocardia sp.<br>MDA0666]                  | GCF_003023875.1 |
| WP_146241295.1 | APATPase+TPR→   <-?  GT4*→?→?→ GT4→                                                                                                                                                                                        | GT4                                                                                                                                                                                                          | 502   | DFQ13_RS33200 | Actinobacte-<br>ria     | Actinokineospora<br>mzabensis   | glycosyltrans-<br>ferase<br>[Actinokineospora<br>mzabensis]   | -               |
| WP_146349043.1 | <-APATPase<-APATPase  ?→ NLPC→ cNMP_binding+HTH_Crp_2→?→ GT4*→   <-ACYC+APATPase+TPR                                                                                                                                       | GT4                                                                                                                                                                                                          | 408   | FKR81_RS01510 | Actinobacte-<br>ria     | Lentzea sp.<br>FXJ1.1311        | glycosyltrans-<br>ferase [Lentzea sp.<br>FXJ1.1311]           | GCF_007845675.1 |

| acc            | operon                                                                             | architecture                           | len  | gen.name      | taxend              | species                    | define                                           | gca             |
|----------------|------------------------------------------------------------------------------------|----------------------------------------|------|---------------|---------------------|----------------------------|--------------------------------------------------|-----------------|
| WP_147321781.1 | SWACOS+GT4*→    <-?<-MFS                                                           | SWACOS+GT4                             | 1096 | BX279_RS09075 | Actinobacteria      | Streptomyces sp. Ag82_O1-9 | glycosyltransferase [Streptomyces sp. Ag82_O1-9] | GCF_003386845.1 |
| WP_147416956.1 | STAND→?→?→ DUF4913→    <-AbiEii<-AbiEi_4  ?→ GT4*→ AbiEi_4→                        | GT4                                    | 495  | NI17_RS16590  | Actinobacteria      | Thermobifida halotolerans  | glycosyltransferase [Thermobifida halotolerans]  | GCF_003574835.1 |
| WP_147994072.1 | TRPR-HTH+PBPI→?→?→    <-TPR+Caspase  GT4*→                                         | GT4                                    | 597  | EAO75_RS06975 | Actinobacteria      | Streptomyces sp. uw30      | glycosyltransferase [Streptomyces sp. uw30]      | GCF_008042075.1 |
| WP_148348287.1 | SWACOS+GT4*→                                                                       | SWACOS+GT4                             | 1238 | FXF65_RS04105 | Actinobacteria      | Actinomadura syzygii       | glycosyltransferase [Actinomadura syzygii]       | -               |
| WP_148640710.1 | MNS+GT4*→                                                                          | MNS+GT4                                | 1142 | EH183_RS01595 | Actinobacteria      | Streptomyces sp. CB01881   | glycosyltransferase [Streptomyces sp. CB01881]   | GCF_002953255.1 |
| WP_148757712.1 | STAND→ VWA+vWA-L+STAND+TPR+GT4*→ Sigma→?→ ABC_tran→                                | VWA+vWA-L+STAND+TPR+GT4                | 1697 | FXF68_RS05215 | Actinobacteria      | Actinomadura sp. CYP1-5    | glycosyltransferase [Actinomadura sp. CYP1-5]    | GCF_008121305.1 |
| WP_148758378.1 | SWACOS+GT4*→                                                                       | SWACOS+GT4                             | 1147 | FXF68_RS08315 | Actinobacteria      | Actinomadura sp. CYP1-5    | glycosyltransferase [Actinomadura sp. CYP1-5]    | GCF_008121305.1 |
| WP_148759187.1 | GT4*→                                                                              | GT4                                    | 581  | FXF68_RS13230 | Actinobacteria      | Actinomadura sp. CYP1-5    | glycosyltransferase [Actinomadura sp. CYP1-5]    | GCF_008121305.1 |
| WP_149263194.1 | LexA→    <-?  ?→    <-?<-?<-?<-cNMP_binding+HTH_Crp_2  GT4*→    <-HTH+APATPase+TPR | GT4                                    | 459  | K4S16_RS34110 | Actinobacteria      | Actinomadura sp. K4S16     | glycosyltransferase [Actinomadura sp. K4S16]     | GCF_008327685.1 |
| WP_149830792.1 | <-HTH+APATPase+TPR  GT4*→?→    <-?<-?<-?<-?  TPR→                                  | GT4                                    | 419  | F3T56_RS42265 | Actinobacteria      | Streptomyces sp. TRM68348  | glycosyltransferase [Streptomyces sp. TRM68348]  | GCF_008386495.1 |
| WP_149896003.1 | NACHT+GT4*→                                                                        | NACHT+GT4                              | 1646 | DXU01_RS22280 | Alphaproteobacteria | Agrobacterium rosae        | glycosyltransferase [Agrobacterium rosae]        | GCF_008501885.1 |
| WP_151009920.1 | <-cNMP_binding+HTH_Crp_2  GT4*→    <-HTH+APATPase+TPR                              | GT4                                    | 457  | F7P10_RS15075 | Actinobacteria      | Actinomadura sp. WMMB 499  | glycosyltransferase [Actinomadura sp. WMMB 499]  | GCF_008824145.1 |
| WP_153338839.1 | ESX-1_EspG→    <-?<-?  ?→?→?→ WXG+TOXIN-PL+ART+Caspase+ZetaToxin+GT4*→             | WXG+TOXIN-PL+ART+Caspase+ZetaToxin+GT4 | 3261 | NRB56_RS02760 | Actinobacteria      | Nocardia sp. RB56          | zeta toxin family protein [Nocardia sp. RB56]    | GCF_009604425.1 |



| acc            | operon                                                                                      | architecture         | len  | gen.name       | taxend              | species                    | defline                                                   | gca             |
|----------------|---------------------------------------------------------------------------------------------|----------------------|------|----------------|---------------------|----------------------------|-----------------------------------------------------------|-----------------|
| WP_153430492.1 | GT4*→                                                                                       | GT4                  | 1126 | GFJ39_RS06035  | Alphaproteobacteria | Gluconobacter sp. AC10     | glycosyltransferase [Gluconobacter sp. AC10]              | -               |
| WP_153467262.1 | GT4*→                                                                                       | GT4                  | 460  | F7Q99_RS30660  | Actinobacteria      | Streptomyces kaniharaensis | glycosyltransferase [Streptomyces kaniharaensis]          | -               |
| WP_153535837.1 | REase+SFI-ATPase→    <-?  ?→    <-?  ?→ GT4+APATPase+TPR+TPR*→                              | GT4+APATPase+TPR+TPR | 1190 | ACRB68_RS23060 | Actinobacteria      | Actinomadura sp. RB68      | tetratricopeptide repeat protein [Actinomadura sp. RB68]  | -               |
| WP_154363881.1 | TniB→?→ STAND+TPR+GT4*→                                                                     | STAND+TPR+GT4        | 1054 | GJ697_RS09905  | Betaproteobacteria  | Duganella                  | MULTISPECIES: glycosyltransferase [Duganella]             | GCF_009674525.1 |
| WP_155055777.1 | TIR+APATPase+GT4*→                                                                          | TIR+APATPase+GT4     | 772  | GFH49_RS11700  | Actinobacteria      | Streptomyces sp. TRM63209  | TIR domain-containing protein [Streptomyces sp. TRM63209] | GCF_009709555.1 |
| WP_155097668.1 | GT4*→                                                                                       | GT4                  | 609  | GL286_RS21805  | Alphaproteobacteria | Paracoccus aestuariivivens | hypothetical protein [Paracoccus aestuariivivens]         | GCF_009711225.1 |
| WP_155252689.1 | Multi-TM→?→ STAND→?→ DUF4913→    <-?  ?→ GT4*→?→?→?→ NUDIX→                                 | GT4                  | 438  | B170_RS0111915 | Actinobacteria      | Salinispora pacifica       | glycosyltransferase [Salinispora pacifica]                | GCF_000514515.1 |
| WP_156002545.1 | <-AbiEii<-AbiEi_4 AbiEi_4→ AbiEii→    <-AbiEii<-AbiEi_4  ?→ GT4*→    <-DUF4913<-?<-?<-STAND | GT4                  | 494  | FZ103_RS17370  | Actinobacteria      | Streptomonospora sp. PA3   | glycosyltransferase [Streptomonospora sp. PA3]            | GCF_009728995.1 |
| WP_156395661.1 | STAND+GT4*→                                                                                 | STAND+GT4            | 1081 | ASC85_RS19490  | Gammaproteobacteria | Pseudomonas sp. Root401    | glycosyltransferase [Pseudomonas sp. Root401]             | GCF_001425105.1 |
| WP_156427756.1 | APATPase+TPR+GT4*→                                                                          | APATPase+TPR+GT4     | 1394 | ML01_RS15555   | Gammaproteobacteria | Thiohalocapsa sp. ML1      | tetratricopeptide repeat protein [Thiohalocapsa sp. ML1]  | GCF_001469165.1 |
| WP_156551292.1 | NACHT+GT4*→                                                                                 | NACHT+GT4            | 1640 | GOZ95_RS24735  | Alphaproteobacteria | Agrobacterium vitis        | glycosyltransferase [Agrobacterium vitis]                 | GCF_009744055.1 |
| WP_156901549.1 | GT4*→?→    <-?<-?<-?  ?→    <-MFS                                                           | GT4                  | 643  | K328_RS25440   | Alphaproteobacteria | Nisaea denitrificans       | glycosyltransferase, partial [Nisaea denitrificans]       | GCF_000426505.1 |



| acc            | operon                                                                                         | architecture                                                      | len  | gen.name             | taxend              | species                         | defline                                                            | gca             |
|----------------|------------------------------------------------------------------------------------------------|-------------------------------------------------------------------|------|----------------------|---------------------|---------------------------------|--------------------------------------------------------------------|-----------------|
| WP_157204012.1 | GT4+APATPase+TPR*→                                                                             | GT4+APATPase+TPR                                                  | 1141 | A1332_RS13095        | Gammaproteobacteria | Methylomonas methanica          | tetratricopeptide repeat protein, partial [Methylomonas methanica] | -               |
| WP_157224231.1 | WXG+ZetaToxin+GT4*→?→    <-WXG+MPTase                                                          | WXG+ZetaToxin+GT4                                                 | 1061 | ON32_RS18080         | Actinobacteria      | Nocardia paucivorans            | zeta toxin family protein [Nocardia paucivorans]                   | GCF_000308675.1 |
| WP_157229180.1 | MPTase→ WXG+SecA+GT4+TetR-HTH+TetR-HTH+MFS+MFS(12x)+ABhydrolase+ST-HisKin*→    <-?  CSD→       | WXG+SecA+GT4+TetR-HTH+TetR-HTH+MFS+MFS(12x)+ABhydrolase+ST-HisKin | 4779 | ON20_RS32170         | Actinobacteria      | Nocardia brevicatena            | MFS transporter [Nocardia brevicatena]                             | GCF_000308495.1 |
| WP_157355048.1 | GT4*→                                                                                          | GT4                                                               | 618  | ARA48_RS12920        | Bacteroidetes       | Parabacteroides distasonis      | glycosyltransferase [Parabacteroides distasonis]                   | GCF_001405935.1 |
| WP_157419626.1 | <-cNMP_binding+HTH_Crp_2  GT4*→    <-HTH+APATPase+TPR                                          | GT4                                                               | 468  | AKI01S_RS02785       | Actinobacteria      | Actinomadura kijaniata          | glycosyltransferase [Actinomadura kijaniata]                       | GCF_001552175.1 |
| WP_157468665.1 | CATRA-N+CATRA-C+GT4*→    <-TPR+Caspase<-?<-?<-?<-?  CHTH+APATPase+TPR+TPR→ CATASP→             | CATRA-N+CATRA-C+GT4                                               | 825  | FRAQA3DRAFT_RS2240   | Actinobacteria      | Frankia sp. QA3                 | glycosyltransferase [Frankia sp. QA3]                              | GCF_000262465.1 |
| WP_157494479.1 | <-CATASP  CATRA-N+CATRA-C+GT4*→    <-HTH+APATPase+TPR                                          | CATRA-N+CATRA-C+GT4                                               | 786  | KUTG_RS53310         | Actinobacteria      | Kutzneria sp. 744               | glycosyltransferase [Kutzneria sp. 744]                            | -               |
| WP_157528945.1 | ART+Caspase+GT4*→?→ GT4→                                                                       | ART+Caspase+GT4                                                   | 1289 | BN1199_RS39095       | Actinobacteria      | Kibdelosporangium sp. MJ126-NF4 | glycosyltransferase [Kibdelosporangium sp. MJ126-NF4]              | -               |
| WP_157636396.1 | STAND+TPR+GT4*→    <-?  ABhydrolase→    <-TRANSGLUTAMINASE                                     | STAND+TPR+GT4                                                     | 1130 | WL03_RS32310         | Betaproteobacteria  | Burkholderia ubonensis          | glycosyltransferase [Burkholderia ubonensis]                       | GCF_001528155.1 |
| WP_157851161.1 | <-TPR+Caspase<-CATASP  CATRA-N+CATRA-C+GT4*→ HTH+APATPase+TPR→    <-HTH  ?→?→?→    <-?<-CATASP | CATRA-N+CATRA-C+GT4                                               | 703  | IF17_RS1000000138500 | Actinobacteria      | Streptomyces cyaneofuscatus     | glycosyltransferase [Streptomyces cyaneofuscatus]                  | GCF_000718135.1 |
| WP_157856282.1 | ABC_tran→?→?→ NACHT+MNS→?→ GT4*→                                                               | GT4                                                               | 412  | BS72_RS20070         | Actinobacteria      | Streptomyces yeochonensis       | glycosyltransferase [Streptomyces yeochonensis]                    | -               |
| WP_157978213.1 | GT4*→                                                                                          | GT4                                                               | 199  | DAT37_RS00050        | Actinobacteria      | Nocardia sp. SYSU K10002        | hypothetical protein [Nocardia sp. SYSU K10002]                    | -               |
| WP_158075353.1 | <-TPR+Caspase<-CATASP  CATRA-N+CATRA-C+GT4*→ HTH+APATPase+TPR→    <-HTH  ?→?→?→    <-?<-CATASP | CATRA-N+CATRA-C+GT4                                               | 718  | AMK32_RS25155        | Actinobacteria      | Streptomyces sp. CB01883        | glycosyltransferase [Streptomyces sp. CB01883]                     | -               |

| acc            | operon                                                                                              | architecture         | len  | gen.name       | taxend               | species                        | define                                                                    | gca             |
|----------------|-----------------------------------------------------------------------------------------------------|----------------------|------|----------------|----------------------|--------------------------------|---------------------------------------------------------------------------|-----------------|
| WP_158247498.1 | GT4+APATPase+TPR+TPR*→                                                                              | GT4+APATPase+TPR+TPR | 1379 | C1X76_RS08190  | Gamma-proteobacteria | unclassified Pseudomonas       | MULTISPECIES: tetratricopeptide repeat protein [unclassified Pseudomonas] | GCF_017350895.1 |
| WP_158633123.1 | cNMP_binding+HTH_Crp_2→?→ GT4*→   <-ACYC+APATPase+TPR                                               | GT4                  | 391  | DMH03_RS26200  | Actinobacteria       | Amycolatopsis sp. WAC 01376    | glycosyltransferase [Amycolatopsis sp. WAC 01376]                         | GCF_003947415.1 |
| WP_158709116.1 | <-ABC_tran<-?  PSE→   <-?  Caspase+NACHT+GT4*→                                                      | Caspase+NACHT+GT4    | 1143 | D3105_RS04960  | Actinobacteria       | Streptomyces globisporus       | caspase family protein [Streptomyces globisporus]                         | GCF_000718455.1 |
| WP_158893312.1 | <-TIR+APATPase  HTH+APATPase+TPR+GT4*→   <-PSE<-?  ?→?→?→ Sigma→                                    | HTH+APATPase+TPR+GT4 | 1166 | FXO23_RS42605  | Actinobacteria       | Amycolatopsis anabasis         | tetratricopeptide repeat protein [Amycolatopsis anabasis]                 | GCF_009765355.1 |
| WP_159015082.1 | TPR+Caspase<-CATASP  CATRA-N+CATRA-C+GT4*→ HTH+APATPase+TPR→   <-HTH  ?→   <-?<-CATASP<-TPR+Caspase | CATRA-N+CATRA-C+GT4  | 711  | AAV49_RS44335  | Actinobacteria       | Streptomyces europaeiscabiei   | glycosyltransferase [Streptomyces europaeiscabiei]                        | GCF_000988945.1 |
| WP_159058466.1 | <-CATASP  CATRA-N+CATRA-C+GT4*→ HTH+APATPase→                                                       | CATRA-N+CATRA-C+GT4  | 711  | AWZ10_RS35055  | Actinobacteria       | Streptomyces europaeiscabiei   | glycosyltransferase [Streptomyces europaeiscabiei]                        | GCF_001550375.1 |
| WP_159073577.1 | GT4*→                                                                                               | GT4                  | 122  | A6027_RS50895  | Actinobacteria       | Streptomyces sp. RTd22         | hypothetical protein [Streptomyces sp. RTd22]                             | GCF_001640565.1 |
| WP_159388811.1 | MFS→   <-?  GT4+APATPase+TPR*→   <-MODE-HTH+PBPII                                                   | GT4+APATPase+TPR     | 1318 | PspR32_RS15206 | Gamma-proteobacteria | Pseudomonas sp. R32            | glycosyltransferase [Pseudomonas sp. R32]                                 | GCF_009866705.1 |
| WP_159399980.1 | Caspase+NACHT+GT4*→   <-?<-?  PSE→   <-?  ?→   <-?<-MFS                                             | Caspase+NACHT+GT4    | 1145 | AVL59_RS21225  | Actinobacteria       | Streptomyces griseochromogenes | caspase family protein [Streptomyces griseochromogenes]                   | GCF_001542625.1 |
| WP_160448122.1 | ABC_tran→?→ GT4*→   <-?  ?→?→?→   <-?  tRNA→?→ Pribosyltran_N+Pribosyl_synth→                       | GT4                  | 643  | DOU06_RS11775  | Actinobacteria       | Clavibacter michiganensis      | glycosyltransferase [Clavibacter michiganensis]                           | GCF_009793225.1 |
| WP_161065972.1 | DUF4913→ GT4*→                                                                                      | GT4                  | 463  | GR925_RS14975  | Actinobacteria       | Streptomyces sp. HUCO-GS316    | glycosyltransferase [Streptomyces sp. HUCO-GS316]                         | GCF_009827025.1 |
| WP_161268609.1 | CATRA-N+CATRA-C+GT4*→                                                                               | CATRA-N+CATRA-C+GT4  | 703  | GT040_RS36085  | Actinobacteria       | Streptomyces sp. SID2119       | glycosyltransferase [Streptomyces sp. SID2119]                            | GCF_009865505.1 |

| acc            | operon                                                                                       | architecture             | len  | gen.name      | taxend              | species                      | define                                                           | gca             |
|----------------|----------------------------------------------------------------------------------------------|--------------------------|------|---------------|---------------------|------------------------------|------------------------------------------------------------------|-----------------|
| WP_161606588.1 | GT4*→                                                                                        | GT4                      | 962  | BHS06_RS25083 | Deltaproteobacteria | Myxococcus xanthus           | glycosyltransferase [Myxococcus xanthus]                         | GCF_006401635.1 |
| WP_161684505.1 | Sigma→?→?→   <-?<-?<-TPR+Caspase GT4*→   <-PSE<-? ?→   <-TRPR-HTH+PBPI                       | GT4                      | 547  | GVV04_RS04063 | Actinobacteria      | Micromonospora sp. NEAU-HG-1 | glycosyltransferase [Micromonospora sp. NEAU-HG-1]               | GCF_009908295.1 |
| WP_161790163.1 | GT4*→   <-?<-?<-?<-CSD                                                                       | GT4                      | 353  | TR46_RS20005  | Actinobacteria      | Streptacidiphilus carbonis   | glycosyltransferase [Streptacidiphilus carbonis]                 | GCF_000787775.1 |
| WP_162672520.1 | GT4+HEPN+TPR+GreAB-C+PIN*→                                                                   | GT4+HEPN+TPR+GreAB-C+PIN | 1685 | SOIL9_RS38685 | Planctomycetes      | Gemmata massiliana           | glycosyltransferase [Gemmata massiliana]                         | GCF_901538265.1 |
| WP_162688623.1 | Caspase+NACHT+GT4*→   <-?<-?<-?<-?  APATPase→                                                | Caspase+NACHT+GT4        | 1148 | DRB89_RS17703 | Actinobacteria      | unclassified Streptomyces    | MULTISPECIES: caspase family protein [unclassified Streptomyces] | GCF_003287915.1 |
| WP_162948626.1 | <-CATASP  CATRA-N+CATRA-C+GT4*→ HTH+APATPase→                                                | CATRA-N+CATRA-C+GT4      | 711  | CQR77_RS44880 | Actinobacteria      | Streptomyces europaeiscabiei | glycosyltransferase [Streptomyces europaeiscabiei]               | GCF_003584825.1 |
| WP_163053769.1 | Calcineurin→?→?→ NACHT+MNS→ MNS+GT4*→                                                        | MNS+GT4                  | 749  | G3I70_RS06860 | Actinobacteria      | Actinomadura bangladeshensis | glycosyltransferase [Actinomadura bangladeshensis]               | GCF_010548065.1 |
| WP_164236650.1 | <-TPR+Caspase<-CATASP  CATRA-N+CATRA-C+GT4*→ HTH+APATPase+TPR→   <-HTH  ?→?→?→   <-?<-CATASP | CATRA-N+CATRA-C+GT4      | 703  | G3I52_RS10700 | Actinobacteria      | Streptomyces cyaneofuscatus  | glycosyltransferase [Streptomyces cyaneofuscatus]                | GCF_010548165.1 |
| WP_164336692.1 | Calcineurin→?→?→ Caspase+NACHT+GT4*→                                                         | Caspase+NACHT+GT4        | 1126 | G3I38_RS20825 | Actinobacteria      | Streptomyces sp. SID7958     | caspase family protein [Streptomyces sp. SID7958]                | GCF_010550365.1 |
| WP_164374106.1 | NACHT→ GT4→   <-?<-PSE<-?<-?<-?  HTH+APATPase→ TPR→   <-GT4                                  | GT4                      | 405  | G3I62_RS29240 | Actinobacteria      | Streptomyces sp. SID14446    | glycosyltransferase [Streptomyces sp. SID14446]                  | GCF_010548515.1 |
| WP_164374112.1 | -                                                                                            | -                        | 402  | G3I62_RS29280 | Actinobacteria      | Streptomyces sp. SID14446    | glycosyltransferase [Streptomyces sp. SID14446]                  | GCF_010548515.1 |
| WP_164438832.1 | Calcineurin→?→?→ Caspase+NACHT+GT4*→                                                         | Caspase+NACHT+GT4        | 1113 | G3I53_RS25925 | Actinobacteria      | Streptomyces sp. SID14436    | caspase family protein [Streptomyces sp. SID14436]               | GCF_010548465.1 |
| WP_164932131.1 | <-HTH+APATPase+TPR  GT4*→?→   <-?<-?<-?  TPR→                                                | GT4                      | 394  | DBB27_RS07160 | Actinobacteria      | unclassified Streptomyces    | MULTISPECIES: glycosyltransferase [unclassified Streptomyces]    | GCF_004104505.1 |

| acc            | operon                                                                                                                                                                                                                                                                     | architecture                                                                                                                                                                                                                                  | len   | gen.name      | taxend              | species                              | defline                                                                | gca             |
|----------------|----------------------------------------------------------------------------------------------------------------------------------------------------------------------------------------------------------------------------------------------------------------------------|-----------------------------------------------------------------------------------------------------------------------------------------------------------------------------------------------------------------------------------------------|-------|---------------|---------------------|--------------------------------------|------------------------------------------------------------------------|-----------------|
| WP_165781010.1 | GT4*→                                                                                                                                                                                                                                                                      | GT4                                                                                                                                                                                                                                           | 631   | CR156_RS18515 | Gammaproteobacteria | Stenotrophomonas lactitubi           | glycosyltransferase [Stenotrophomonas lactitubi]                       | GCF_014763005.1 |
| WP_166659524.1 | -                                                                                                                                                                                                                                                                          | -                                                                                                                                                                                                                                             | 752   | EV186_RS37545 | Actinobacteria      | Labedaea rhizosphaerae               | glycosyltransferase family 4 protein [Labedaea rhizosphaerae]          | GCF_004362825.1 |
| WP_167375417.1 | APATPase+GT4*→                                                                                                                                                                                                                                                             | APATPase+GT4                                                                                                                                                                                                                                  | 1344  | AWM79_RS04505 | Gammaproteobacteria | Pseudomonas agarici                  | glycosyltransferase [Pseudomonas agarici]                              | GCF_001543125.1 |
| WP_167485160.1 | <-ESX-1_EspG<-?<-?<-?  ?→?→ WXG+PolB-NTase+GT4+GT4+Caspase*→?→?→ GT4→                                                                                                                                                                                                      | WXG+PolB-NTase+GT4+GT4+Caspase                                                                                                                                                                                                                | 2733  | F6W96_RS05200 | Actinobacteria      | Nocardia terpenica                   | glycosyltransferase [Nocardia terpenica]                               | GCF_011801165.1 |
| WP_167531487.1 | NACHT+GT4*→    <-Vsr                                                                                                                                                                                                                                                       | NACHT+GT4                                                                                                                                                                                                                                     | 1557  | EN799_RS48175 | Alphaproteobacteria | Mesorhizobium sp. M8A.F.Ca.ET.197.01 | glycosyltransferase [Mesorhizobium sp. M8A.F.Ca.ET.197.01.1.1]         | GCF_004791385.1 |
| WP_167631834.1 | GT4+APATPase+TPR*→                                                                                                                                                                                                                                                         | GT4+APATPase+TPR                                                                                                                                                                                                                              | 1107  | HCI87_RS07630 | Zetaproteobacteria  | Mariprofundus ferrooxydans           | tetratricopeptide repeat protein, partial [Mariprofundus ferrooxydans] | GCF_011947535.1 |
| WP_167983001.1 | CATRA-N+CATRA-C+GT4*→ HTH+APATPase+TPR→    <-HTH  ?→?→?→    <-?<-CATASP                                                                                                                                                                                                    | CATRA-N+CATRA-C+GT4                                                                                                                                                                                                                           | 845   | HCN08_RS12120 | Actinobacteria      | Streptomyces sp. PRB2-1              | glycosyltransferase family 4 protein [Streptomyces sp. PRB2-1]         | GCF_012034175.1 |
| WP_167985631.1 | GT4*→                                                                                                                                                                                                                                                                      | GT4                                                                                                                                                                                                                                           | 425   | HCN08_RS25733 | Actinobacteria      | Streptomyces sp. PRB2-1              | glycosyltransferase [Streptomyces sp. PRB2-1]                          | GCF_012034175.1 |
| WP_168028895.1 | <-ABC_tran<-?<-?<-?<-?  ?→ GT4+APATPase*→                                                                                                                                                                                                                                  | GT4+APATPase                                                                                                                                                                                                                                  | 988   | HC024_RS03995 | Gammaproteobacteria | Methylococcaceae bacterium WWC4      | glycosyltransferase, partial [Methylococcaceae bacterium WWC4]         | -               |
| WP_168031569.1 | GT4*→                                                                                                                                                                                                                                                                      | GT4                                                                                                                                                                                                                                           | 644   | HC024_RS14290 | Gammaproteobacteria | Methylococcaceae bacterium WWC4      | glycosyltransferase, partial [Methylococcaceae bacterium WWC4]         | -               |
| WP_168435140.1 | WXG+MPTase→ WXG+SecA+LuxR-HTH+LuxR-HTH+LuxR-HTH+LuxR-HTH+ST-HisKin+MPTase+GT4+TetR-HTH+TetR-HTH+Tox-ART-RSE+LuxR-HTH+LuxR-HTH+LuxR-HTH+GNTR-HTH+LuxR-HTH+LuxR-HTH+ST-HisKin+ST-HisKin+XPC-C+TM+TM+TM+TM+LuxR-HTH+PP2C+MPTase+MPTase+LuxR-HTH+LuxR-HTH+DOC*→?→ ABhydrolase→ | WXG+SecA+LuxR-HTH+LuxR-HTH+LuxR-HTH+LuxR-HTH+ST-HisKin+MPTase+GT4+TetR-HTH+TetR-HTH+Tox-ART-RSE+LuxR-HTH+LuxR-HTH+LuxR-HTH+GNTR-HTH+LuxR-HTH+LuxR-HTH+ST-HisKin+ST-HisKin+XPC-C+TM+TM+TM+TM+LuxR-HTH+PP2C+MPTase+MPTase+LuxR-HTH+LuxR-HTH+DOC | 13688 | HGB45_RS23560 | Actinobacteria      | Nocardia cerradoensis                | MFS transporter [Nocardia cerradoensis]                                | GCF_012396065.1 |
| WP_168477813.1 | GT4*→?→?→    <-?  ?→    <-NUDIX                                                                                                                                                                                                                                            | GT4                                                                                                                                                                                                                                           | 455   | HEP86_RS05755 | Actinobacteria      | Streptomyces sp. RPA4-5              | glycosyltransferase [Streptomyces sp. RPA4-5]                          | GCF_012273495.1 |

| acc            | operon                                                                                 | architecture                | len  | gen.name       | taxend              | species                       | define                                                                | gca             |
|----------------|----------------------------------------------------------------------------------------|-----------------------------|------|----------------|---------------------|-------------------------------|-----------------------------------------------------------------------|-----------------|
| WP_168512294.1 | <-ABhydrolase  ?->?> GT4*->   <-?  TRPR-HTH+PBPI->                                     | GT4                         | 650  | HEP87_RS39620  | Actinobacteria      | Streptomyces sp. S1D4-11      | glycosyltransferase [Streptomyces sp. S1D4-11]                        | -               |
| WP_169316088.1 | APATPase+GT4*->   <-?<-?<-?<-?  ?>   <-?<-PSE  GST_N_2+GST_C->                         | APATPase+GT4                | 1344 | PA-GAR_RS28405 | Gammaproteobacteria | Pseudomonas agarici           | glycosyltransferase [Pseudomonas agarici]                             | GCF_000280785.1 |
| WP_169804810.1 | GT4+APATPase*->                                                                        | GT4+APATPase                | 986  | HTA01S_RS24384 | Betaproteobacteria  | Hydrogenophaga taeniospiralis | glycosyltransferase, partial [Hydrogenophaga taeniospiralis]          | GCF_001592305.1 |
| WP_169807203.1 | GT4*->                                                                                 | GT4                         | 449  | AWW66_RS34117  | Actinobacteria      | Micromonospora rosaria        | glycosyltransferase, partial [Micromonospora rosaria]                 | GCF_001567585.1 |
| WP_169850673.1 | GT4+B12-binding+RADICAL-SAM*->                                                         | GT4+B12-binding+RADICAL-SAM | 1115 | HBO43_RS21616  | Gammaproteobacteria | Pseudomonas veronii           | cobalamin B12-binding domain-containing protein [Pseudomonas veronii] | GCF_012985315.1 |
| WP_170285467.1 | SWACOS+GT4*->?>   <-?  ?> PadR->                                                       | SWACOS+GT4                  | 1175 | FHX75_RS26815  | Actinobacteria      | Micromonospora palomenae      | glycosyltransferase [Micromonospora palomenae]                        | GCF_007829925.1 |
| WP_171081495.1 | GT4*->                                                                                 | GT4                         | 489  | HG542_RS14775  | Actinobacteria      | Streptomyces morookaense      | glycosyltransferase [Streptomyces morookaense]                        | GCF_014656115.1 |
| WP_171579219.1 | <-SIG+RCDG1+YidC_periplas+60KD_IMP<-?<-?  ?> tRNA->?> NACHT+GT4*->?>?>?>?>?> DUF4242-> | NACHT+GT4                   | 1638 | HCN58_RS10240  | Alphaproteobacteria | Bradyrhizobium sp. WSM 1791   | glycosyltransferase [Bradyrhizobium sp. WSM 1791]                     | GCF_013114825.1 |
| WP_171675029.1 | GT4*->                                                                                 | GT4                         | 451  | HNR71_RS02445  | Actinobacteria      | Kribbella sandramycini        | glycosyltransferase [Kribbella sandramycini]                          | GCF_013131805.1 |
| WP_171901162.1 | -                                                                                      | -                           | 147  | NK6_RS51125    | Alphaproteobacteria | Bradyrhizobium diazoefficiens | glycosyltransferase [Bradyrhizobium diazoefficiens]                   | GCF_001549695.1 |
| WP_172109703.1 | SWACOS+GT4*->                                                                          | SWACOS+GT4                  | 1148 | HL667_RS06640  | Alphaproteobacteria | Bradyrhizobium sp. 83012      | glycosyltransferase [Bradyrhizobium sp. 83012]                        | GCF_013178925.1 |
| WP_172132695.1 | SWACOS+GT4*->                                                                          | SWACOS+GT4                  | 1148 | HL666_RS23775  | Alphaproteobacteria | unclassified Bradyrhizobium   | MULTISPECIES: glycosyltransferase [unclassified Bradyrhizobium]       | GCF_013178945.1 |

| acc            | operon                                                                             | architecture                | len  | gen.name      | taxend              | species                           | define                                                                         | gca             |
|----------------|------------------------------------------------------------------------------------|-----------------------------|------|---------------|---------------------|-----------------------------------|--------------------------------------------------------------------------------|-----------------|
| WP_172175287.1 | GT4+B12-binding+RADICAL-SAM*→                                                      | GT4+B12-binding+RADICAL-SAM | 1278 | GNZ13_RS39275 | Deltaproteobacteria | Paraburkholderia sp. 5N           | radical SAM protein [Paraburkholderia sp. 5N]                                  | GCF_013177735.1 |
| WP_173124146.1 | <-STAND<-?<-?<-?<-?  cNMP_binding+HTH_Crp_2→?→ GT4*→   <-ACYC+APATPase+TPR         | GT4                         | 409  | GC106_RS03330 | Actinobacteria      | Kibdelosporangium sp. 4NS15       | glycosyltransferase [Kibdelosporangium sp. 4NS15]                              | GCF_013280595.1 |
| WP_173195298.1 | GT4+APATPase+TPR+TPR*→                                                             | GT4+APATPase+TPR+TPR        | 1427 | HR085_RS00175 | Deltaproteobacteria | Geobacter sp. SVR                 | tetratricopeptide repeat protein [Geobacter sp. SVR]                           | GCF_016865365.1 |
| WP_173395462.1 | DJ-1_PfpI→ LexA→?→   <-?<-?<-?<-cNMP_binding+HTH_Crp_2  GT4*→   <-HTH+APATPase+TPR | GT4                         | 438  | GWI34_RS19435 | Actinobacteria      | Actinomadura sp. DSM 109109       | glycosyltransferase [Actinomadura sp. DSM 109109]                              | -               |
| WP_173526832.1 | GT4+APATPase+TPR+TPR*→                                                             | GT4+APATPase+TPR+TPR        | 1208 | HII36_RS31010 | Actinobacteria      | Nonomurea sp. NN258               | tetratricopeptide repeat protein [Nonomurea sp. NN258]                         | GCF_013283785.1 |
| WP_173991751.1 | PfkB→?→?→?→ GT4+B12-binding+RADICAL-SAM*→                                          | GT4+B12-binding+RADICAL-SAM | 1387 | G6M20_RS23615 | Alphaproteobacteria | Agrobacterium salinitolerans      | cobalamin B12-binding domain-containing protein [Agrobacterium salinitolerans] | GCF_013317635.1 |
| WP_174156125.1 | HTH+MPTase→?→   <-?  ?→?→ NACHT+GT4*→                                              | NACHT+GT4                   | 1640 | G6L88_RS21970 | Alphaproteobacteria | Rhizobium skienewicense           | glycosyltransferase [Rhizobium skienewicense]                                  | GCF_013320815.1 |
| WP_174295717.1 | GT4*→                                                                              | GT4                         | 613  | G7A66_RS11060 | Alphaproteobacteria | Altererythrobaacter sp. SALINAS58 | glycosyltransferase [Altererythrobaacter sp. SALINAS58]                        | GCF_013336795.1 |
| WP_174397973.1 | GT4*→                                                                              | GT4                         | 602  | FEG63_RS11180 | Actinobacteria      | Mycolicibacterium sphagni         | glycosyltransferase [Mycolicibacterium sphagni]                                | GCF_013337765.1 |
| WP_174527417.1 | STAND→?→ DUF4913→   <-?  ?→ GT4*→?→?→?→ NUDIX→   <-?<-ABC_tran                     | GT4                         | 438  | HUW36_RS07305 | Actinobacteria      | Micromonospora maritima           | glycosyltransferase [Micromonospora maritima]                                  | GCF_902825405.1 |
| WP_175264897.1 | NACHT+MNS→ MNS+GT4*→   <-?<-CASPAE                                                 | MNS+GT4                     | 752  | HRW23_RS35520 | Actinobacteria      | Streptomyces lunaelactis          | glycosyltransferase [Streptomyces lunaelactis]                                 | GCF_013357925.1 |
| WP_176052200.1 | STAND+GT4*→?→   <-Cluster466_2clades<-?<-?<-?  DNA_methylase→   <-Vsr              | STAND+GT4                   | 1090 | HWY02_RS01425 | Deltaproteobacteria | Paraburkholderia caribensis       | glycosyltransferase [Paraburkholderia caribensis]                              | GCF_902833585.1 |



| acc            | operon                                             | architecture                | len  | gen.name          | taxend              | species                    | define                                                     | gca             |
|----------------|----------------------------------------------------|-----------------------------|------|-------------------|---------------------|----------------------------|------------------------------------------------------------|-----------------|
| WP_176182010.1 | MNS+GT4*→    <-?<-?<-AA_permease                   | MNS+GT4                     | 1151 | HUT19_RS21388     | Actinobacteria      | Streptomyces sp. NA02950   | glycosyltransferase<br>[Streptomyces sp. NA02950]          | GCF_013364155.1 |
| WP_176404534.1 | <-cNMP_binding+HTH_Crp_2  GT4*→                    | GT4                         | 427  | HUX53_RS18900     | Actinobacteria      | Actinomadura sp. BRA 177   | glycosyltransferase<br>[Actinomadura sp. BRA 177]          | GCF_013372625.1 |
| WP_176437046.1 | <-ABC_tran<-?  ?→    <-?<-PSE<-?  GT4+TPR+TPR*→    | GT4+TPR+TPR                 | 1428 | HUW62_RS36513     | Betaproteobacteria  | Myxococcus sp. AM011       | tetratricopeptide repeat protein<br>[Myxococcus sp. AM011] | GCF_013372595.1 |
| WP_176439087.1 | HTH_Tnp_1→ TnpB_IS66→?→ NACHT+GT4*→                | NACHT+GT4                   | 1580 | CHB75_RS08020     | Alphaproteobacteria | Puniceibacterium sediminis | glycosyltransferase<br>[Puniceibacterium sediminis]        | GCF_900188035.1 |
| WP_176652673.1 | GT4+NACHT*→ HTH_Tnp_1→ TnpB_IS66→                  | GT4+NACHT                   | 1759 | FHT31_RS13553     | Betaproteobacteria  | Rugamonas sp. SG757        | glycosyltransferase<br>[Rugamonas sp. SG757]               | GCF_013375995.1 |
| WP_176735010.1 | <-TPR+Caspase  GT4*→                               | GT4                         | 546  | GA0070563_RS27500 | Actinobacteria      | Micromonospora carbonacea  | glycosyltransferase<br>[Micromonospora carbonacea]         | GCF_900091535.1 |
| WP_177014872.1 | STAND+GT4*→                                        | STAND+GT4                   | 1080 | HX791_RS25783     | Gammaproteobacteria | Pseudomonas costantinii    | glycosyltransferase<br>[Pseudomonas costantinii]           | GCF_013386225.1 |
| WP_177060102.1 | <-MFS  ?→    <-?<-?  ?→    <-?  APATPase+GT4*→     | APATPase+GT4                | 1336 | HX876_RS19433     | Gammaproteobacteria | Pseudomonas gingeri        | glycosyltransferase<br>[Pseudomonas gingeri]               | GCF_013385575.1 |
| WP_177062848.1 | GT4+B12-binding+RADICAL-SAM*→                      | GT4+B12-binding+RADICAL-SAM | 1404 | HX876_RS14360     | Gammaproteobacteria | Pseudomonas gingeri        | radical SAM protein<br>[Pseudomonas gingeri]               | GCF_013385575.1 |
| WP_177065618.1 | <-MFS  ?→    <-?<-?  ?→    <-?  APATPase+TPR+GT4*→ | APATPase+TPR+GT4            | 1336 | HX861_RS09040     | Gammaproteobacteria | Pseudomonas gingeri        | glycosyltransferase<br>[Pseudomonas gingeri]               | GCF_013385925.1 |
| WP_177072953.1 | <-MFS  ?→    <-?<-?  ?→    <-?  APATPase+TPR+GT4*→ | APATPase+TPR+GT4            | 1336 | HX800_RS13020     | Gammaproteobacteria | Pseudomonas gingeri        | glycosyltransferase<br>[Pseudomonas gingeri]               | GCF_013386965.1 |
| WP_177108140.1 | <-MFS  ?→    <-?<-?  ?→    <-?  APATPase+GT4*→     | APATPase+GT4                | 1299 | HX867_RS22143     | Gammaproteobacteria | Pseudomonas gingeri        | glycosyltransferase<br>[Pseudomonas gingeri]               | GCF_013386235.1 |
| WP_177126920.1 | <-MFS  ?→    <-?<-?  ?→    <-?  APATPase+TPR+GT4*→ | APATPase+TPR+GT4            | 1336 | HX831_RS01003     | Gammaproteobacteria | Pseudomonas gingeri        | glycosyltransferase<br>[Pseudomonas gingeri]               | GCF_013386815.1 |

| acc            | operon                                                    | architecture                | len  | gen.name      | taxend              | species                          | defline                                                                            | gca             |
|----------------|-----------------------------------------------------------|-----------------------------|------|---------------|---------------------|----------------------------------|------------------------------------------------------------------------------------|-----------------|
| WP_177129208.1 | <-MFS  ?→    <-?<-?  ?→    <-?  APATPase+TPR+GT4*→        | APATPase+TPR+GT4            | 1299 | HX808_RS1734  | Gamma               | Pseudomonas<br>gingeri           | glycosyltrans-<br>ferase<br>[Pseudomonas<br>gingeri]                               | GCF_013385905.1 |
| WP_177204219.1 | <-Sigma  ?→    <-?<-?<-?  GT4+B12-binding*→               | GT4+B12-binding             | 1122 | BMY84_RS26750 | Alphaproteobacteria | Sphingobium sp.<br>AP50          | glycosyltrans-<br>ferase<br>[Sphingobium sp.<br>AP50]                              | GCF_900109095.1 |
| WP_178066132.1 | <-TPR+Caspase  GT4*→                                      | GT4                         | 546  | HDA31_RS04955 | Actinobacteria      | Micromonospora<br>carbonacea     | glycosyltrans-<br>ferase<br>[Micromonospora<br>carbonacea]                         | GCF_013389765.1 |
| WP_178963184.1 | GT4+B12-binding+RADICAL-SAM*→                             | GT4+B12-binding+RADICAL-SAM | 1404 | HX895_RS03680 | Gamma               | Pseudomonas<br>gingeri           | radical SAM<br>protein<br>[Pseudomonas<br>gingeri]                                 | GCF_013387125.1 |
| WP_178963665.1 | <-MFS  ?→    <-?<-?  ?→    <-?  APATPase+GT4*→            | APATPase+GT4                | 1336 | HX895_RS14805 | Gamma               | Pseudomonas<br>gingeri           | glycosyltrans-<br>ferase<br>[Pseudomonas<br>gingeri]                               | GCF_013387125.1 |
| WP_179766782.1 | TRPR-HTH+PBPI→?→ SIG+Lipase_GDSL_2→?→ Zeta_toxin→?→ GT4*→ | GT4                         | 461  | HNR12_RS07370 | Actinobacteria      | Streptomonospora<br>nanhaiensis  | glycosyltrans-<br>ferase<br>[Strep-<br>tomonospora<br>nanhaiensis]                 | GCF_013410565.1 |
| WP_179767386.1 | GT4*→?→    <-?<-?<-tRNA-synt_1b+S4                        | GT4                         | 489  | HNR12_RS10915 | Actinobacteria      | Streptomonospora<br>nanhaiensis  | glycosyltrans-<br>ferase<br>[Strep-<br>tomonospora<br>nanhaiensis]                 | GCF_013410565.1 |
| WP_179826407.1 | <-APATPase+TPR  ?→ GT4*→                                  | GT4                         | 524  | HNR10_RS21750 | Actinobacteria      | Nocardiopsis<br>aegyptia         | hypothetical<br>protein<br>[Nocardiopsis<br>aegyptia]                              | GCF_013410755.1 |
| WP_179835700.1 | GT4*→    <-?<-?<-cNMP_binding+HTH_Crp_2                   | GT4                         | 388  | BJ999_RS25940 | Actinobacteria      | Actinomadura<br>citrea           | glycosyltrans-<br>ferase<br>[Actinomadura<br>citrea]                               | GCF_014648455.1 |
| WP_180357038.1 | HTH→?→?→    <-?<-?  Caspase+NACHT+GT4*→                   | Caspase+NACHT+GT4           | 1165 | BX283_RS03940 | Actinobacteria      | Streptomyces sp.<br>TLI_146      | caspase family<br>protein<br>[Streptomyces sp.<br>TLI_146]                         | GCF_002846415.1 |
| WP_180930380.1 | MNS+GT4*→                                                 | MNS+GT4                     | 1268 | E0L36_RS19290 | Actinobacteria      | Streptomyces sp.<br>AJS327       | glycosyltrans-<br>ferase<br>[Streptomyces sp.<br>AJS327]                           | GCF_013450295.1 |
| WP_181043331.1 | MFS→?→?→ WXG→?→ GT4*→?→ GT4→                              | GT4                         | 391  | CLV40_RS37790 | Actinobacteria      | Actinokineospora<br>auranticolor | glycosyltrans-<br>ferase family 4<br>protein<br>[Actinokineospora<br>auranticolor] | GCF_002934265.1 |

| acc            | operon                                    | architecture | len | gen.name      | taxend         | species               | define                                         | gca             |
|----------------|-------------------------------------------|--------------|-----|---------------|----------------|-----------------------|------------------------------------------------|-----------------|
| WP_181245803.1 | GT4*→ APATPase+TPR→    <-?<-TRPR-HTH+PBPI | GT4          | 401 | B0I28_RS15405 | Actinobacteria | Glycomyces artemisiae | glycosyltransferase<br>[Glycomyces artemisiae] | GCF_003002955.1 |

Source data. Domain architectures of eukaryotic GT4s with a special emphasis on the LSE in Acropora

| acc            | architecture  | len  | gen.name     | tax                                     | species             | GCA             |
|----------------|---------------|------|--------------|-----------------------------------------|---------------------|-----------------|
| XP_015747238.1 | GT4           | 461  | LOC107327009 | Eukaryota>Opisthokonta>Metazoa>Cnidaria | Acropora digitifera | GCF_000222465.1 |
| XP_015747313.1 | GT4+NACHT     | 648  | LOC107327071 | Eukaryota>Opisthokonta>Metazoa>Cnidaria | Acropora digitifera | GCF_000222465.1 |
| XP_015747371.1 | GT4           | 492  | LOC107327132 | Eukaryota>Opisthokonta>Metazoa>Cnidaria | Acropora digitifera | GCF_000222465.1 |
| XP_015747395.1 | GT4+NACHT     | 628  | LOC107327154 | Eukaryota>Opisthokonta>Metazoa>Cnidaria | Acropora digitifera | GCF_000222465.1 |
| XP_015747754.1 | GT4           | 430  | LOC107327516 | Eukaryota>Opisthokonta>Metazoa>Cnidaria | Acropora digitifera | GCF_000222465.1 |
| XP_015747753.1 | GT4           | 437  | LOC107327516 | Eukaryota>Opisthokonta>Metazoa>Cnidaria | Acropora digitifera | GCF_000222465.1 |
| XP_015747750.1 | GT4           | 437  | LOC107327516 | Eukaryota>Opisthokonta>Metazoa>Cnidaria | Acropora digitifera | GCF_000222465.1 |
| XP_015747752.1 | GT4           | 437  | LOC107327516 | Eukaryota>Opisthokonta>Metazoa>Cnidaria | Acropora digitifera | GCF_000222465.1 |
| XP_015747751.1 | GT4           | 437  | LOC107327516 | Eukaryota>Opisthokonta>Metazoa>Cnidaria | Acropora digitifera | GCF_000222465.1 |
| XP_015747749.1 | GT4           | 451  | LOC107327516 | Eukaryota>Opisthokonta>Metazoa>Cnidaria | Acropora digitifera | GCF_000222465.1 |
| XP_015748052.1 | GT4           | 595  | LOC107327825 | Eukaryota>Opisthokonta>Metazoa>Cnidaria | Acropora digitifera | GCF_000222465.1 |
| XP_015748207.1 | GT4           | 424  | LOC107328002 | Eukaryota>Opisthokonta>Metazoa>Cnidaria | Acropora digitifera | GCF_000222465.1 |
| XP_015748206.1 | GT4           | 424  | LOC107328002 | Eukaryota>Opisthokonta>Metazoa>Cnidaria | Acropora digitifera | GCF_000222465.1 |
| XP_015748205.1 | GT4           | 429  | LOC107328002 | Eukaryota>Opisthokonta>Metazoa>Cnidaria | Acropora digitifera | GCF_000222465.1 |
| XP_015748202.1 | GT4           | 430  | LOC107328002 | Eukaryota>Opisthokonta>Metazoa>Cnidaria | Acropora digitifera | GCF_000222465.1 |
| XP_015748203.1 | GT4           | 430  | LOC107328002 | Eukaryota>Opisthokonta>Metazoa>Cnidaria | Acropora digitifera | GCF_000222465.1 |
| XP_015748201.1 | GT4           | 437  | LOC107328002 | Eukaryota>Opisthokonta>Metazoa>Cnidaria | Acropora digitifera | GCF_000222465.1 |
| XP_015748200.1 | GT4           | 442  | LOC107328002 | Eukaryota>Opisthokonta>Metazoa>Cnidaria | Acropora digitifera | GCF_000222465.1 |
| XP_015748274.1 | GT4           | 440  | LOC107328074 | Eukaryota>Opisthokonta>Metazoa>Cnidaria | Acropora digitifera | GCF_000222465.1 |
| XP_015748402.1 | ZU5+ZU5+GT4   | 1030 | LOC107328179 | Eukaryota>Opisthokonta>Metazoa>Cnidaria | Acropora digitifera | GCF_000222465.1 |
| XP_015748412.1 | GT4+NACHT     | 551  | LOC107328186 | Eukaryota>Opisthokonta>Metazoa>Cnidaria | Acropora digitifera | GCF_000222465.1 |
| XP_015748513.1 | SIG+GT4+DEATH | 524  | LOC107328287 | Eukaryota>Opisthokonta>Metazoa>Cnidaria | Acropora digitifera | GCF_000222465.1 |
| XP_015748512.1 | SIG+GT4+DEATH | 526  | LOC107328287 | Eukaryota>Opisthokonta>Metazoa>Cnidaria | Acropora digitifera | GCF_000222465.1 |
| XP_015748877.1 | GT4           | 416  | LOC107328661 | Eukaryota>Opisthokonta>Metazoa>Cnidaria | Acropora digitifera | GCF_000222465.1 |
| XP_015748878.1 | GT4+NACHT     | 578  | LOC107328662 | Eukaryota>Opisthokonta>Metazoa>Cnidaria | Acropora digitifera | GCF_000222465.1 |
| XP_015748920.1 | GT4           | 389  | LOC107328707 | Eukaryota>Opisthokonta>Metazoa>Cnidaria | Acropora digitifera | GCF_000222465.1 |
| XP_015748918.1 | GT4           | 391  | LOC107328707 | Eukaryota>Opisthokonta>Metazoa>Cnidaria | Acropora digitifera | GCF_000222465.1 |
| XP_015748919.1 | GT4           | 391  | LOC107328707 | Eukaryota>Opisthokonta>Metazoa>Cnidaria | Acropora digitifera | GCF_000222465.1 |
| XP_015749378.1 | GT4           | 610  | LOC107329155 | Eukaryota>Opisthokonta>Metazoa>Cnidaria | Acropora digitifera | GCF_000222465.1 |
| XP_015749585.1 | GT4           | 400  | LOC107329409 | Eukaryota>Opisthokonta>Metazoa>Cnidaria | Acropora digitifera | GCF_000222465.1 |
| XP_015749584.1 | GT4+TF-AF0608 | 480  | LOC107329409 | Eukaryota>Opisthokonta>Metazoa>Cnidaria | Acropora digitifera | GCF_000222465.1 |
| XP_015749790.1 | GT4           | 470  | LOC107329632 | Eukaryota>Opisthokonta>Metazoa>Cnidaria | Acropora digitifera | GCF_000222465.1 |
| XP_015749876.1 | GT4+NACHT     | 583  | LOC107329721 | Eukaryota>Opisthokonta>Metazoa>Cnidaria | Acropora digitifera | GCF_000222465.1 |
| XP_015750005.1 | GT4           | 637  | LOC107329865 | Eukaryota>Opisthokonta>Metazoa>Cnidaria | Acropora digitifera | GCF_000222465.1 |
| XP_015750060.1 | GT4           | 418  | LOC107329915 | Eukaryota>Opisthokonta>Metazoa>Cnidaria | Acropora digitifera | GCF_000222465.1 |
| XP_015750058.1 | GT4           | 483  | LOC107329915 | Eukaryota>Opisthokonta>Metazoa>Cnidaria | Acropora digitifera | GCF_000222465.1 |
| XP_015750090.1 | GT4           | 464  | LOC107329946 | Eukaryota>Opisthokonta>Metazoa>Cnidaria | Acropora digitifera | GCF_000222465.1 |
| XP_015750089.1 | GT4           | 477  | LOC107329946 | Eukaryota>Opisthokonta>Metazoa>Cnidaria | Acropora digitifera | GCF_000222465.1 |
| XP_015750088.1 | GT4           | 510  | LOC107329946 | Eukaryota>Opisthokonta>Metazoa>Cnidaria | Acropora digitifera | GCF_000222465.1 |
| XP_015750086.1 | GT4           | 513  | LOC107329946 | Eukaryota>Opisthokonta>Metazoa>Cnidaria | Acropora digitifera | GCF_000222465.1 |
| XP_015750087.1 | GT4           | 513  | LOC107329946 | Eukaryota>Opisthokonta>Metazoa>Cnidaria | Acropora digitifera | GCF_000222465.1 |
| XP_015750637.1 | GT4           | 341  | LOC107330559 | Eukaryota>Opisthokonta>Metazoa>Cnidaria | Acropora digitifera | GCF_000222465.1 |
| XP_015753085.1 | SIG+GT4       | 635  | LOC107332846 | Eukaryota>Opisthokonta>Metazoa>Cnidaria | Acropora digitifera | GCF_000222465.1 |







| acc            | architecture            | len  | gen.name        | tax                                     | species                                                  | GCA             |
|----------------|-------------------------|------|-----------------|-----------------------------------------|----------------------------------------------------------|-----------------|
| XP_015748415.1 | GT4+NACHT               | 785  | LOC107328189    | Eukaryota>Opisthokonta>Metazoa>Cnidaria | Acropora digitifera                                      | GCF_000222465.1 |
| XP_015749493.1 | GT4+NACHT               | 1051 | LOC107329298    | Eukaryota>Opisthokonta>Metazoa>Cnidaria | Acropora digitifera                                      | GCF_000222465.1 |
| XP_015756823.1 | GT4+NACHT               | 1117 | LOC107336267    | Eukaryota>Opisthokonta>Metazoa>Cnidaria | Acropora digitifera                                      | GCF_000222465.1 |
| XP_015757684.1 | GT4+NACHT               | 1102 | LOC107337083    | Eukaryota>Opisthokonta>Metazoa>Cnidaria | Acropora digitifera                                      | GCF_000222465.1 |
| XP_015757683.1 | GT4+NACHT               | 1214 | LOC107337083    | Eukaryota>Opisthokonta>Metazoa>Cnidaria | Acropora digitifera                                      | GCF_000222465.1 |
| XP_015759265.1 | GT4+NACHT               | 1127 | LOC107338542    | Eukaryota>Opisthokonta>Metazoa>Cnidaria | Acropora digitifera                                      | GCF_000222465.1 |
| XP_015760037.1 | GT4+NACHT               | 897  | LOC107339286    | Eukaryota>Opisthokonta>Metazoa>Cnidaria | Acropora digitifera                                      | GCF_000222465.1 |
| XP_015764733.1 | GT4+NACHT               | 1250 | LOC107343665    | Eukaryota>Opisthokonta>Metazoa>Cnidaria | Acropora digitifera                                      | GCF_000222465.1 |
| XP_015764740.1 | GT4+NACHT               | 1273 | LOC107343669    | Eukaryota>Opisthokonta>Metazoa>Cnidaria | Acropora digitifera                                      | GCF_000222465.1 |
| XP_015766114.1 | GT4+NACHT               | 883  | LOC107344942    | Eukaryota>Opisthokonta>Metazoa>Cnidaria | Acropora digitifera                                      | GCF_000222465.1 |
| XP_015767800.1 | GT4+NACHT               | 1362 | LOC107346514    | Eukaryota>Opisthokonta>Metazoa>Cnidaria | Acropora digitifera                                      | GCF_000222465.1 |
| XP_015769559.1 | GT4+NACHT               | 1073 | LOC107348070    | Eukaryota>Opisthokonta>Metazoa>Cnidaria | Acropora digitifera                                      | GCF_000222465.1 |
| XP_015771075.1 | GT4+NACHT               | 1131 | LOC107349444    | Eukaryota>Opisthokonta>Metazoa>Cnidaria | Acropora digitifera                                      | GCF_000222465.1 |
| XP_015771449.1 | GT4+NACHT               | 1095 | LOC107349777    | Eukaryota>Opisthokonta>Metazoa>Cnidaria | Acropora digitifera                                      | GCF_000222465.1 |
| XP_015774737.1 | GT4+NACHT               | 1214 | LOC107352931    | Eukaryota>Opisthokonta>Metazoa>Cnidaria | Acropora digitifera                                      | GCF_000222465.1 |
| XP_015774735.1 | GT4+NACHT               | 1240 | LOC107352931    | Eukaryota>Opisthokonta>Metazoa>Cnidaria | Acropora digitifera                                      | GCF_000222465.1 |
| XP_015774736.1 | GT4+NACHT               | 1240 | LOC107352931    | Eukaryota>Opisthokonta>Metazoa>Cnidaria | Acropora digitifera                                      | GCF_000222465.1 |
| XP_015775665.1 | GT4+NACHT               | 1107 | LOC107353792    | Eukaryota>Opisthokonta>Metazoa>Cnidaria | Acropora digitifera                                      | GCF_000222465.1 |
| XP_015775664.1 | GT4+NACHT               | 1107 | LOC107353792    | Eukaryota>Opisthokonta>Metazoa>Cnidaria | Acropora digitifera                                      | GCF_000222465.1 |
| XP_015777175.1 | GT4+NACHT               | 1097 | LOC107355160    | Eukaryota>Opisthokonta>Metazoa>Cnidaria | Acropora digitifera                                      | GCF_000222465.1 |
| XP_015777174.1 | GT4+NACHT               | 1160 | LOC107355160    | Eukaryota>Opisthokonta>Metazoa>Cnidaria | Acropora digitifera                                      | GCF_000222465.1 |
| XP_015777173.1 | GT4+NACHT               | 1185 | LOC107355160    | Eukaryota>Opisthokonta>Metazoa>Cnidaria | Acropora digitifera                                      | GCF_000222465.1 |
| XP_015777171.1 | GT4+NACHT               | 1210 | LOC107355160    | Eukaryota>Opisthokonta>Metazoa>Cnidaria | Acropora digitifera                                      | GCF_000222465.1 |
| XP_015777168.1 | GT4+NACHT               | 1214 | LOC107355160    | Eukaryota>Opisthokonta>Metazoa>Cnidaria | Acropora digitifera                                      | GCF_000222465.1 |
| XP_015777169.1 | GT4+NACHT               | 1214 | LOC107355160    | Eukaryota>Opisthokonta>Metazoa>Cnidaria | Acropora digitifera                                      | GCF_000222465.1 |
| XP_015777170.1 | GT4+NACHT               | 1214 | LOC107355160    | Eukaryota>Opisthokonta>Metazoa>Cnidaria | Acropora digitifera                                      | GCF_000222465.1 |
| XP_015777167.1 | GT4+NACHT               | 1229 | LOC107355160    | Eukaryota>Opisthokonta>Metazoa>Cnidaria | Acropora digitifera                                      | GCF_000222465.1 |
| XP_015777166.1 | GT4+NACHT               | 1234 | LOC107355160    | Eukaryota>Opisthokonta>Metazoa>Cnidaria | Acropora digitifera                                      | GCF_000222465.1 |
| XP_015777164.1 | GT4+NACHT               | 1237 | LOC107355160    | Eukaryota>Opisthokonta>Metazoa>Cnidaria | Acropora digitifera                                      | GCF_000222465.1 |
| XP_015777165.1 | GT4+NACHT               | 1237 | LOC107355160    | Eukaryota>Opisthokonta>Metazoa>Cnidaria | Acropora digitifera                                      | GCF_000222465.1 |
| XP_015778512.1 | GT4+NACHT               | 1054 | LOC107356410    | Eukaryota>Opisthokonta>Metazoa>Cnidaria | Acropora digitifera                                      | GCF_000222465.1 |
| XP_015779196.1 | GT4+NACHT               | 1094 | LOC107357068    | Eukaryota>Opisthokonta>Metazoa>Cnidaria | Acropora digitifera                                      | GCF_000222465.1 |
| XP_015779200.1 | GT4+NACHT               | 980  | LOC107357071    | Eukaryota>Opisthokonta>Metazoa>Cnidaria | Acropora digitifera                                      | GCF_000222465.1 |
| XP_015779450.1 | GT4+NACHT               | 1180 | LOC107357325    | Eukaryota>Opisthokonta>Metazoa>Cnidaria | Acropora digitifera                                      | GCF_000222465.1 |
| XP_015779456.1 | GT4+NACHT               | 723  | LOC107357328    | Eukaryota>Opisthokonta>Metazoa>Cnidaria | Acropora digitifera                                      | GCF_000222465.1 |
| XP_015779455.1 | GT4+NACHT               | 748  | LOC107357328    | Eukaryota>Opisthokonta>Metazoa>Cnidaria | Acropora digitifera                                      | GCF_000222465.1 |
| XP_015779454.1 | GT4+NACHT               | 750  | LOC107357328    | Eukaryota>Opisthokonta>Metazoa>Cnidaria | Acropora digitifera                                      | GCF_000222465.1 |
| XP_015779453.1 | GT4+NACHT               | 775  | LOC107357328    | Eukaryota>Opisthokonta>Metazoa>Cnidaria | Acropora digitifera                                      | GCF_000222465.1 |
| XP_015779585.1 | GT4+NACHT               | 1318 | LOC107357460    | Eukaryota>Opisthokonta>Metazoa>Cnidaria | Acropora digitifera                                      | GCF_000222465.1 |
| KHO50967.1     | GT4                     | 400  | QT05_C0047G0016 | Archaea                                 | archaeon GW2011_AR13                                     | GCA_000805965.1 |
| EGD71903.1     | GT4                     | 378  | CSMARM5_0008    | Archaea>DPANN group                     | Candidatus Parvarchaeum acidophilus<br>ARMAN-5_5-way FS' | GCA_000192615.1 |
| XP_015768804.1 | SIG+GT4+DEATH+sGTP+sGTP | 2069 | LOC107347416    | Eukaryota>Opisthokonta>Metazoa>Cnidaria | Acropora digitifera                                      | GCF_000222465.1 |
| XP_015768802.1 | SIG+GT4+DEATH+sGTP+sGTP | 2089 | LOC107347416    | Eukaryota>Opisthokonta>Metazoa>Cnidaria | Acropora digitifera                                      | GCF_000222465.1 |
| XP_015768801.1 | GT4+DEATH+sGTP+sGTP     | 2091 | LOC107347416    | Eukaryota>Opisthokonta>Metazoa>Cnidaria | Acropora digitifera                                      | GCF_000222465.1 |
| XP_015768800.1 | GT4+DEATH+sGTP+sGTP     | 2092 | LOC107347416    | Eukaryota>Opisthokonta>Metazoa>Cnidaria | Acropora digitifera                                      | GCF_000222465.1 |
| XP_015768799.1 | GT4+DEATH+sGTP+sGTP     | 2092 | LOC107347416    | Eukaryota>Opisthokonta>Metazoa>Cnidaria | Acropora digitifera                                      | GCF_000222465.1 |
| XP_015768797.1 | SIG+GT4+DEATH+sGTP+sGTP | 2094 | LOC107347416    | Eukaryota>Opisthokonta>Metazoa>Cnidaria | Acropora digitifera                                      | GCF_000222465.1 |
| XP_015768795.1 | GT4+DEATH+sGTP+sGTP     | 2094 | LOC107347416    | Eukaryota>Opisthokonta>Metazoa>Cnidaria | Acropora digitifera                                      | GCF_000222465.1 |
| XP_015768798.1 | SIG+GT4+DEATH+sGTP+sGTP | 2094 | LOC107347416    | Eukaryota>Opisthokonta>Metazoa>Cnidaria | Acropora digitifera                                      | GCF_000222465.1 |
| XP_015768796.1 | SIG+GT4+DEATH+sGTP+sGTP | 2094 | LOC107347416    | Eukaryota>Opisthokonta>Metazoa>Cnidaria | Acropora digitifera                                      | GCF_000222465.1 |
| XP_015768794.1 | GT4+DEATH+sGTP+sGTP     | 2094 | LOC107347416    | Eukaryota>Opisthokonta>Metazoa>Cnidaria | Acropora digitifera                                      | GCF_000222465.1 |





| acc            | architecture            | len  | gen.name             | tax                                     | species                | GCA             |
|----------------|-------------------------|------|----------------------|-----------------------------------------|------------------------|-----------------|
| XP_015768844.1 | GT4+sGTP+sGTP           | 1928 | LOC107347432         | Eukaryota>Opisthokonta>Metazoa>Cnidaria | Acropora digitifera    | GCF_000222465.1 |
| XP_015768842.1 | SIG+GT4+sGTP+sGTP       | 1929 | LOC107347432         | Eukaryota>Opisthokonta>Metazoa>Cnidaria | Acropora digitifera    | GCF_000222465.1 |
| XP_015768841.1 | SIG+GT4+sGTP+sGTP       | 1930 | LOC107347432         | Eukaryota>Opisthokonta>Metazoa>Cnidaria | Acropora digitifera    | GCF_000222465.1 |
| XP_015768840.1 | SIG+GT4+sGTP+sGTP       | 1951 | LOC107347432         | Eukaryota>Opisthokonta>Metazoa>Cnidaria | Acropora digitifera    | GCF_000222465.1 |
| XP_015768839.1 | SIG+GT4+sGTP+sGTP       | 1953 | LOC107347432         | Eukaryota>Opisthokonta>Metazoa>Cnidaria | Acropora digitifera    | GCF_000222465.1 |
| XP_015767989.1 | GT4+NACHT               | 1796 | LOC107346689         | Eukaryota>Opisthokonta>Metazoa>Cnidaria | Acropora digitifera    | GCF_000222465.1 |
| XP_015767988.1 | SIG+GT4+NACHT           | 1806 | LOC107346689         | Eukaryota>Opisthokonta>Metazoa>Cnidaria | Acropora digitifera    | GCF_000222465.1 |
| XP_015776065.1 | GT4+NACHT               | 1674 | LOC107354137         | Eukaryota>Opisthokonta>Metazoa>Cnidaria | Acropora digitifera    | GCF_000222465.1 |
| XP_015776064.1 | GT4+NACHT               | 1675 | LOC107354137         | Eukaryota>Opisthokonta>Metazoa>Cnidaria | Acropora digitifera    | GCF_000222465.1 |
| XP_015776063.1 | SIG+GT4+NACHT           | 1801 | LOC107354137         | Eukaryota>Opisthokonta>Metazoa>Cnidaria | Acropora digitifera    | GCF_000222465.1 |
| XP_015776062.1 | SIG+GT4+NACHT           | 1828 | LOC107354137         | Eukaryota>Opisthokonta>Metazoa>Cnidaria | Acropora digitifera    | GCF_000222465.1 |
| XP_015776061.1 | SIG+GT4+NACHT           | 1838 | LOC107354137         | Eukaryota>Opisthokonta>Metazoa>Cnidaria | Acropora digitifera    | GCF_000222465.1 |
| XP_015776060.1 | SIG+GT4+NACHT           | 1877 | LOC107354137         | Eukaryota>Opisthokonta>Metazoa>Cnidaria | Acropora digitifera    | GCF_000222465.1 |
| XP_015776059.1 | SIG+GT4+NACHT           | 1885 | LOC107354137         | Eukaryota>Opisthokonta>Metazoa>Cnidaria | Acropora digitifera    | GCF_000222465.1 |
| XP_015776058.1 | SIG+GT4+NACHT           | 1914 | LOC107354137         | Eukaryota>Opisthokonta>Metazoa>Cnidaria | Acropora digitifera    | GCF_000222465.1 |
| XP_015776057.1 | SIG+GT4+NACHT           | 1938 | LOC107354137         | Eukaryota>Opisthokonta>Metazoa>Cnidaria | Acropora digitifera    | GCF_000222465.1 |
| XP_015776056.1 | SIG+GT4+NACHT           | 1947 | LOC107354137         | Eukaryota>Opisthokonta>Metazoa>Cnidaria | Acropora digitifera    | GCF_000222465.1 |
| XP_015776055.1 | SIG+GT4+NACHT           | 1951 | LOC107354137         | Eukaryota>Opisthokonta>Metazoa>Cnidaria | Acropora digitifera    | GCF_000222465.1 |
| XP_015776054.1 | SIG+GT4+NACHT           | 1951 | LOC107354137         | Eukaryota>Opisthokonta>Metazoa>Cnidaria | Acropora digitifera    | GCF_000222465.1 |
| XP_015747144.1 | GT4+NACHT               | 1735 | LOC107326906         | Eukaryota>Opisthokonta>Metazoa>Cnidaria | Acropora digitifera    | GCF_000222465.1 |
| XP_015764064.1 | GT4+NACHT               | 1703 | LOC107343050         | Eukaryota>Opisthokonta>Metazoa>Cnidaria | Acropora digitifera    | GCF_000222465.1 |
| XP_015764063.1 | GT4+NACHT               | 1703 | LOC107343050         | Eukaryota>Opisthokonta>Metazoa>Cnidaria | Acropora digitifera    | GCF_000222465.1 |
| XP_015764065.1 | GT4+NACHT               | 1703 | LOC107343050         | Eukaryota>Opisthokonta>Metazoa>Cnidaria | Acropora digitifera    | GCF_000222465.1 |
| XP_015764062.1 | GT4+NACHT               | 1703 | LOC107343050         | Eukaryota>Opisthokonta>Metazoa>Cnidaria | Acropora digitifera    | GCF_000222465.1 |
| XP_015764061.1 | GT4+NACHT               | 1715 | LOC107343050         | Eukaryota>Opisthokonta>Metazoa>Cnidaria | Acropora digitifera    | GCF_000222465.1 |
| XP_015764057.1 | GT4+NACHT               | 1719 | LOC107343050         | Eukaryota>Opisthokonta>Metazoa>Cnidaria | Acropora digitifera    | GCF_000222465.1 |
| XP_015764060.1 | GT4+NACHT               | 1719 | LOC107343050         | Eukaryota>Opisthokonta>Metazoa>Cnidaria | Acropora digitifera    | GCF_000222465.1 |
| XP_015764058.1 | GT4+NACHT               | 1719 | LOC107343050         | Eukaryota>Opisthokonta>Metazoa>Cnidaria | Acropora digitifera    | GCF_000222465.1 |
| XP_015764059.1 | GT4+NACHT               | 1719 | LOC107343050         | Eukaryota>Opisthokonta>Metazoa>Cnidaria | Acropora digitifera    | GCF_000222465.1 |
| XP_015777734.1 | GT4+NACHT               | 1739 | LOC107355669         | Eukaryota>Opisthokonta>Metazoa>Cnidaria | Acropora digitifera    | GCF_000222465.1 |
| XP_015778874.1 | SIG+GT4+VWA+SERAprtease | 1218 | LOC107356762         | Eukaryota>Opisthokonta>Metazoa>Cnidaria | Acropora digitifera    | GCF_000222465.1 |
| XP_015778871.1 | SIG+GT4+VWA+SERAprtease | 1221 | LOC107356762         | Eukaryota>Opisthokonta>Metazoa>Cnidaria | Acropora digitifera    | GCF_000222465.1 |
| XP_015778870.1 | SIG+GT4+VWA+SERAprtease | 1221 | LOC107356762         | Eukaryota>Opisthokonta>Metazoa>Cnidaria | Acropora digitifera    | GCF_000222465.1 |
| XP_015778873.1 | SIG+GT4+VWA+SERAprtease | 1221 | LOC107356762         | Eukaryota>Opisthokonta>Metazoa>Cnidaria | Acropora digitifera    | GCF_000222465.1 |
| XP_015778868.1 | SIG+GT4+VWA+SERAprtease | 1221 | LOC107356762         | Eukaryota>Opisthokonta>Metazoa>Cnidaria | Acropora digitifera    | GCF_000222465.1 |
| XP_015778872.1 | SIG+GT4+VWA+SERAprtease | 1221 | LOC107356762         | Eukaryota>Opisthokonta>Metazoa>Cnidaria | Acropora digitifera    | GCF_000222465.1 |
| XP_015778880.1 | SIG+GT4+VWA+SERAprtease | 1218 | LOC107356768         | Eukaryota>Opisthokonta>Metazoa>Cnidaria | Acropora digitifera    | GCF_000222465.1 |
| XP_015778878.1 | SIG+GT4+VWA+SERAprtease | 1221 | LOC107356768         | Eukaryota>Opisthokonta>Metazoa>Cnidaria | Acropora digitifera    | GCF_000222465.1 |
| XP_015778879.1 | SIG+GT4+VWA+SERAprtease | 1221 | LOC107356768         | Eukaryota>Opisthokonta>Metazoa>Cnidaria | Acropora digitifera    | GCF_000222465.1 |
| XP_015751629.1 | DED+TPR+GT4             | 1894 | LOC107331536         | Eukaryota>Opisthokonta>Metazoa>Cnidaria | Acropora digitifera    | GCF_000222465.1 |
| XP_015751628.1 | DED+TPR+GT4             | 2015 | LOC107331536         | Eukaryota>Opisthokonta>Metazoa>Cnidaria | Acropora digitifera    | GCF_000222465.1 |
| XP_015751627.1 | DED+TPR+GT4             | 2019 | LOC107331536         | Eukaryota>Opisthokonta>Metazoa>Cnidaria | Acropora digitifera    | GCF_000222465.1 |
| XP_015751626.1 | DED+TPR+GT4             | 2020 | LOC107331536         | Eukaryota>Opisthokonta>Metazoa>Cnidaria | Acropora digitifera    | GCF_000222465.1 |
| XP_015758975.1 | SIG+TPR+GT4             | 1867 | LOC107338255         | Eukaryota>Opisthokonta>Metazoa>Cnidaria | Acropora digitifera    | GCF_000222465.1 |
| KXJ17955.1     | DED+TPR+GT4             | 1737 | AC249_AIPGENE20062   | Eukaryota>Opisthokonta>Metazoa>Cnidaria | Exaiptasia diaphana    | GCA_001417965.1 |
| KXJ23466.1     | DED+GT4                 | 1693 | Samd9l               | Eukaryota>Opisthokonta>Metazoa>Cnidaria | Exaiptasia diaphana    | GCA_001417965.1 |
| XP_001627530.1 | DED+GT4                 | 1802 | NEMVEDRAFT_v1g214094 | Eukaryota>Opisthokonta>Metazoa>Cnidaria | Nematostella vectensis | -               |
| XP_002586741.1 | DED+GT4                 | 538  | BRAFLDRAFT_105739    | Eukaryota>Opisthokonta>Metazoa>Chordata | Branchiostoma floridae | -               |
| XP_002593761.1 | sGTP+GT4                | 511  | BRAFLDRAFT_107710    | Eukaryota>Opisthokonta>Metazoa>Chordata | Branchiostoma floridae | -               |
| XP_002585662.1 | GT4                     | 514  | BRAFLDRAFT_111592    | Eukaryota>Opisthokonta>Metazoa>Chordata | Branchiostoma floridae | -               |
| XP_002588370.1 | SIG+GT4                 | 424  | BRAFLDRAFT_63320     | Eukaryota>Opisthokonta>Metazoa>Chordata | Branchiostoma floridae | -               |
| XP_002594621.1 | GT4                     | 411  | BRAFLDRAFT_77600     | Eukaryota>Opisthokonta>Metazoa>Chordata | Branchiostoma floridae | -               |

| acc            | architecture             | len  | gen.name         | tax                                         | species                  | GCA             |
|----------------|--------------------------|------|------------------|---------------------------------------------|--------------------------|-----------------|
| XP_002594622.1 | DEATH+GT4                | 506  | BRAFLDRAFT_77601 | Eukaryota>Opisthokonta>Metazoa>Chordata     | Branchiostoma floridae   | -               |
| XP_002604494.1 | GT4                      | 475  | BRAFLDRAFT_79207 | Eukaryota>Opisthokonta>Metazoa>Chordata     | Branchiostoma floridae   | -               |
| XP_002731475.1 | GT4                      | 433  | LOC100372804     | Eukaryota>Opisthokonta>Metazoa>Hemichordata | Saccoglossus kowalevskii | GCF_000003605.2 |
| XP_015772447.1 | GT4+TPR                  | 596  | LOC107350717     | Eukaryota>Opisthokonta>Metazoa>Cnidaria     | Acropora digitifera      | GCF_000222465.1 |
| XP_015772446.1 | GT4+TPR                  | 623  | LOC107350717     | Eukaryota>Opisthokonta>Metazoa>Cnidaria     | Acropora digitifera      | GCF_000222465.1 |
| XP_015772445.1 | GT4+TPR                  | 624  | LOC107350717     | Eukaryota>Opisthokonta>Metazoa>Cnidaria     | Acropora digitifera      | GCF_000222465.1 |
| XP_015772444.1 | GT4+TPR                  | 642  | LOC107350717     | Eukaryota>Opisthokonta>Metazoa>Cnidaria     | Acropora digitifera      | GCF_000222465.1 |
| XP_015772442.1 | GT4+TPR                  | 674  | LOC107350717     | Eukaryota>Opisthokonta>Metazoa>Cnidaria     | Acropora digitifera      | GCF_000222465.1 |
| XP_015772443.1 | GT4+TPR                  | 674  | LOC107350717     | Eukaryota>Opisthokonta>Metazoa>Cnidaria     | Acropora digitifera      | GCF_000222465.1 |
| XP_015775035.1 | GT4+TPR                  | 635  | LOC107353224     | Eukaryota>Opisthokonta>Metazoa>Cnidaria     | Acropora digitifera      | GCF_000222465.1 |
| XP_015770118.1 | GT4+sGTP+sGTP+DEATH      | 1249 | LOC107348573     | Eukaryota>Opisthokonta>Metazoa>Cnidaria     | Acropora digitifera      | GCF_000222465.1 |
| XP_015770115.1 | GT4+sGTP+sGTP+DEATH      | 1249 | LOC107348573     | Eukaryota>Opisthokonta>Metazoa>Cnidaria     | Acropora digitifera      | GCF_000222465.1 |
| XP_015770116.1 | GT4+sGTP+sGTP+DEATH      | 1249 | LOC107348573     | Eukaryota>Opisthokonta>Metazoa>Cnidaria     | Acropora digitifera      | GCF_000222465.1 |
| XP_015770117.1 | GT4+sGTP+sGTP+DEATH      | 1249 | LOC107348573     | Eukaryota>Opisthokonta>Metazoa>Cnidaria     | Acropora digitifera      | GCF_000222465.1 |
| XP_015770113.1 | GT4+sGTP+sGTP+DEATH      | 1249 | LOC107348573     | Eukaryota>Opisthokonta>Metazoa>Cnidaria     | Acropora digitifera      | GCF_000222465.1 |
| XP_015776051.1 | GT4+sGTP                 | 1386 | LOC107354135     | Eukaryota>Opisthokonta>Metazoa>Cnidaria     | Acropora digitifera      | GCF_000222465.1 |
| XP_015764075.1 | GT4+NACHT                | 1225 | LOC107343052     | Eukaryota>Opisthokonta>Metazoa>Cnidaria     | Acropora digitifera      | GCF_000222465.1 |
| XP_015764074.1 | GT4+NACHT                | 1233 | LOC107343052     | Eukaryota>Opisthokonta>Metazoa>Cnidaria     | Acropora digitifera      | GCF_000222465.1 |
| XP_015764072.1 | GT4+NACHT                | 1238 | LOC107343052     | Eukaryota>Opisthokonta>Metazoa>Cnidaria     | Acropora digitifera      | GCF_000222465.1 |
| XP_015764073.1 | GT4+NACHT                | 1238 | LOC107343052     | Eukaryota>Opisthokonta>Metazoa>Cnidaria     | Acropora digitifera      | GCF_000222465.1 |
| XP_015764071.1 | GT4+NACHT                | 1255 | LOC107343052     | Eukaryota>Opisthokonta>Metazoa>Cnidaria     | Acropora digitifera      | GCF_000222465.1 |
| XP_015764070.1 | GT4+NACHT                | 1259 | LOC107343052     | Eukaryota>Opisthokonta>Metazoa>Cnidaria     | Acropora digitifera      | GCF_000222465.1 |
| XP_015747310.1 | GT4+NACHT                | 1361 | LOC107327069     | Eukaryota>Opisthokonta>Metazoa>Cnidaria     | Acropora digitifera      | GCF_000222465.1 |
| XP_015772577.1 | GT4+NACHT                | 1796 | LOC107350842     | Eukaryota>Opisthokonta>Metazoa>Cnidaria     | Acropora digitifera      | GCF_000222465.1 |
| XP_015772579.1 | SAP+GT4+NACHT            | 2199 | LOC107350844     | Eukaryota>Opisthokonta>Metazoa>Cnidaria     | Acropora digitifera      | GCF_000222465.1 |
| XP_015776067.1 | GT4+NACHT                | 1600 | LOC107354137     | Eukaryota>Opisthokonta>Metazoa>Cnidaria     | Acropora digitifera      | GCF_000222465.1 |
| XP_015776066.1 | SIG+GT4+NACHT            | 1671 | LOC107354137     | Eukaryota>Opisthokonta>Metazoa>Cnidaria     | Acropora digitifera      | GCF_000222465.1 |
| XP_015759030.1 | sGTP+GT4+TM              | 1258 | LOC107338309     | Eukaryota>Opisthokonta>Metazoa>Cnidaria     | Acropora digitifera      | GCF_000222465.1 |
| XP_015759029.1 | sGTP+GT4+TM              | 1258 | LOC107338309     | Eukaryota>Opisthokonta>Metazoa>Cnidaria     | Acropora digitifera      | GCF_000222465.1 |
| XP_015759028.1 | sGTP+GT4+TM              | 1271 | LOC107338309     | Eukaryota>Opisthokonta>Metazoa>Cnidaria     | Acropora digitifera      | GCF_000222465.1 |
| XP_015759026.1 | sGTP+GT4+TM              | 1272 | LOC107338309     | Eukaryota>Opisthokonta>Metazoa>Cnidaria     | Acropora digitifera      | GCF_000222465.1 |
| XP_015759027.1 | sGTP+GT4+TM              | 1272 | LOC107338309     | Eukaryota>Opisthokonta>Metazoa>Cnidaria     | Acropora digitifera      | GCF_000222465.1 |
| XP_015749674.1 | GT4+PNPase               | 965  | LOC107329499     | Eukaryota>Opisthokonta>Metazoa>Cnidaria     | Acropora digitifera      | GCF_000222465.1 |
| XP_015749675.1 | GT4+PNPase               | 965  | LOC107329499     | Eukaryota>Opisthokonta>Metazoa>Cnidaria     | Acropora digitifera      | GCF_000222465.1 |
| XP_015749860.1 | GT4+PNPase+NABD-unk4     | 933  | LOC107329706     | Eukaryota>Opisthokonta>Metazoa>Cnidaria     | Acropora digitifera      | GCF_000222465.1 |
| XP_015749859.1 | GT4+PNPase+NABD-unk4     | 961  | LOC107329706     | Eukaryota>Opisthokonta>Metazoa>Cnidaria     | Acropora digitifera      | GCF_000222465.1 |
| XP_015749858.1 | GT4+PNPase+NABD-unk4     | 982  | LOC107329706     | Eukaryota>Opisthokonta>Metazoa>Cnidaria     | Acropora digitifera      | GCF_000222465.1 |
| XP_015770482.1 | GT4                      | 132  | LOC107348905     | Eukaryota>Opisthokonta>Metazoa>Cnidaria     | Acropora digitifera      | GCF_000222465.1 |
| XP_015777289.1 | GT4                      | 119  | LOC107355256     | Eukaryota>Opisthokonta>Metazoa>Cnidaria     | Acropora digitifera      | GCF_000222465.1 |
| XP_015777288.1 | GT4                      | 135  | LOC107355256     | Eukaryota>Opisthokonta>Metazoa>Cnidaria     | Acropora digitifera      | GCF_000222465.1 |
| XP_015777287.1 | GT4                      | 135  | LOC107355256     | Eukaryota>Opisthokonta>Metazoa>Cnidaria     | Acropora digitifera      | GCF_000222465.1 |
| XP_015777286.1 | GT4                      | 135  | LOC107355256     | Eukaryota>Opisthokonta>Metazoa>Cnidaria     | Acropora digitifera      | GCF_000222465.1 |
| XP_015754287.1 | GT4+ANK                  | 1391 | LOC107333936     | Eukaryota>Opisthokonta>Metazoa>Cnidaria     | Acropora digitifera      | GCF_000222465.1 |
| XP_015754286.1 | GT4+ANK                  | 1391 | LOC107333936     | Eukaryota>Opisthokonta>Metazoa>Cnidaria     | Acropora digitifera      | GCF_000222465.1 |
| XP_015754284.1 | GT4+ANK                  | 1391 | LOC107333936     | Eukaryota>Opisthokonta>Metazoa>Cnidaria     | Acropora digitifera      | GCF_000222465.1 |
| XP_015779234.1 | GT4+ANK+Immank+Immank    | 1392 | LOC107357096     | Eukaryota>Opisthokonta>Metazoa>Cnidaria     | Acropora digitifera      | GCF_000222465.1 |
| XP_015780882.1 | GT4+DEATH                | 240  | LOC107358816     | Eukaryota>Opisthokonta>Metazoa>Cnidaria     | Acropora digitifera      | GCF_000222465.1 |
| XP_015780881.1 | GT4+DEATH                | 243  | LOC107358816     | Eukaryota>Opisthokonta>Metazoa>Cnidaria     | Acropora digitifera      | GCF_000222465.1 |
| XP_015780880.1 | GT4+DEATH                | 247  | LOC107358816     | Eukaryota>Opisthokonta>Metazoa>Cnidaria     | Acropora digitifera      | GCF_000222465.1 |
| XP_015780879.1 | GT4+DEATH                | 250  | LOC107358816     | Eukaryota>Opisthokonta>Metazoa>Cnidaria     | Acropora digitifera      | GCF_000222465.1 |
| XP_015754283.1 | GT4+ANK+DED+APATPase+TPR | 1546 | LOC107333935     | Eukaryota>Opisthokonta>Metazoa>Cnidaria     | Acropora digitifera      | GCF_000222465.1 |
| XP_015754282.1 | GT4+ANK+DED+APATPase+TPR | 1560 | LOC107333935     | Eukaryota>Opisthokonta>Metazoa>Cnidaria     | Acropora digitifera      | GCF_000222465.1 |

| acc            | architecture             | len  | gen.name          | tax                                     | species                   | GCA             |
|----------------|--------------------------|------|-------------------|-----------------------------------------|---------------------------|-----------------|
| XP_015754281.1 | GT4+ANK+DED+APATPase+TPR | 1597 | LOC107333935      | Eukaryota>Opisthokonta>Metazoa>Cnidaria | Acropora digitifera       | GCF_000222465.1 |
| XP_015754288.1 | GT4+ANK                  | 1351 | LOC107333936      | Eukaryota>Opisthokonta>Metazoa>Cnidaria | Acropora digitifera       | GCF_000222465.1 |
| XP_015778952.1 | GT4+ANK+Immank+Immank    | 1280 | LOC107356842      | Eukaryota>Opisthokonta>Metazoa>Cnidaria | Acropora digitifera       | GCF_000222465.1 |
| XP_015779236.1 | GT4+Immank+ANK           | 1086 | LOC107357098      | Eukaryota>Opisthokonta>Metazoa>Cnidaria | Acropora digitifera       | GCF_000222465.1 |
| XP_015764079.1 | GT4+NACHT                | 1177 | LOC107343052      | Eukaryota>Opisthokonta>Metazoa>Cnidaria | Acropora digitifera       | GCF_000222465.1 |
| XP_015764078.1 | GT4+NACHT                | 1178 | LOC107343052      | Eukaryota>Opisthokonta>Metazoa>Cnidaria | Acropora digitifera       | GCF_000222465.1 |
| XP_015764077.1 | GT4+NACHT                | 1188 | LOC107343052      | Eukaryota>Opisthokonta>Metazoa>Cnidaria | Acropora digitifera       | GCF_000222465.1 |
| XP_015764083.1 | GT4+NACHT                | 1101 | LOC107343052      | Eukaryota>Opisthokonta>Metazoa>Cnidaria | Acropora digitifera       | GCF_000222465.1 |
| XP_015764082.1 | GT4+NACHT                | 1107 | LOC107343052      | Eukaryota>Opisthokonta>Metazoa>Cnidaria | Acropora digitifera       | GCF_000222465.1 |
| XP_015764081.1 | GT4+NACHT                | 1161 | LOC107343052      | Eukaryota>Opisthokonta>Metazoa>Cnidaria | Acropora digitifera       | GCF_000222465.1 |
| XP_015778876.1 | SIG+GT4+VWA+SERAprotease | 1080 | LOC107356762      | Eukaryota>Opisthokonta>Metazoa>Cnidaria | Acropora digitifera       | GCF_000222465.1 |
| XP_015778875.1 | SIG+GT4+VWA+SERAprotease | 1145 | LOC107356762      | Eukaryota>Opisthokonta>Metazoa>Cnidaria | Acropora digitifera       | GCF_000222465.1 |
| XP_015778882.1 | SIG+GT4+VWA+SERAprotease | 1145 | LOC107356768      | Eukaryota>Opisthokonta>Metazoa>Cnidaria | Acropora digitifera       | GCF_000222465.1 |
| XP_015771521.1 | SIG+GT4                  | 729  | LOC107349844      | Eukaryota>Opisthokonta>Metazoa>Cnidaria | Acropora digitifera       | GCF_000222465.1 |
| XP_015771522.1 | SIG+GT4                  | 729  | LOC107349844      | Eukaryota>Opisthokonta>Metazoa>Cnidaria | Acropora digitifera       | GCF_000222465.1 |
| XP_015771520.1 | SIG+GT4                  | 756  | LOC107349844      | Eukaryota>Opisthokonta>Metazoa>Cnidaria | Acropora digitifera       | GCF_000222465.1 |
| XP_015750317.1 | GT4+ZU5                  | 721  | LOC107330190      | Eukaryota>Opisthokonta>Metazoa>Cnidaria | Acropora digitifera       | GCF_000222465.1 |
| XP_015770123.1 | GT4                      | 704  | LOC107348579      | Eukaryota>Opisthokonta>Metazoa>Cnidaria | Acropora digitifera       | GCF_000222465.1 |
| XP_015770122.1 | GT4                      | 705  | LOC107348579      | Eukaryota>Opisthokonta>Metazoa>Cnidaria | Acropora digitifera       | GCF_000222465.1 |
| XP_015752964.1 | SIG+GT4                  | 564  | LOC107332737      | Eukaryota>Opisthokonta>Metazoa>Cnidaria | Acropora digitifera       | GCF_000222465.1 |
| XP_015752963.1 | SIG+GT4                  | 565  | LOC107332737      | Eukaryota>Opisthokonta>Metazoa>Cnidaria | Acropora digitifera       | GCF_000222465.1 |
| XP_015756764.1 | SIG+GT4                  | 570  | LOC107336220      | Eukaryota>Opisthokonta>Metazoa>Cnidaria | Acropora digitifera       | GCF_000222465.1 |
| OLD79042.1     | GT4                      | 474  | AUF62_00760       | Archaea                                 | archaeon 13_1_20CM_52_20  | GCA_001919675.1 |
| OLC62495.1     | GT4                      | 495  | AUH73_04505       | Archaea                                 | archaeon 13_1_40CM_4_53_4 | GCA_001918315.1 |
| OLB46884.1     | GT4                      | 495  | AUI07_02860       | Archaea                                 | archaeon 13_2_20CM_2_53_6 | GCA_001915065.1 |
| XP_015765897.1 | GT4                      | 245  | LOC107344718      | Eukaryota>Opisthokonta>Metazoa>Cnidaria | Acropora digitifera       | GCF_000222465.1 |
| XP_015768791.1 | GT4                      | 252  | LOC107347414      | Eukaryota>Opisthokonta>Metazoa>Cnidaria | Acropora digitifera       | GCF_000222465.1 |
| XP_015773769.1 | GT4                      | 263  | LOC107351980      | Eukaryota>Opisthokonta>Metazoa>Cnidaria | Acropora digitifera       | GCF_000222465.1 |
| XP_015754295.1 | GT4                      | 202  | LOC107333943      | Eukaryota>Opisthokonta>Metazoa>Cnidaria | Acropora digitifera       | GCF_000222465.1 |
| XP_015754297.1 | GT4                      | 202  | LOC107333943      | Eukaryota>Opisthokonta>Metazoa>Cnidaria | Acropora digitifera       | GCF_000222465.1 |
| XP_015754296.1 | GT4                      | 202  | LOC107333943      | Eukaryota>Opisthokonta>Metazoa>Cnidaria | Acropora digitifera       | GCF_000222465.1 |
| XP_015764068.1 | GT4+NACHT                | 1309 | LOC107343052      | Eukaryota>Opisthokonta>Metazoa>Cnidaria | Acropora digitifera       | GCF_000222465.1 |
| XP_015764067.1 | GT4+NACHT                | 1312 | LOC107343052      | Eukaryota>Opisthokonta>Metazoa>Cnidaria | Acropora digitifera       | GCF_000222465.1 |
| XP_015747884.1 | RVT+DEATH+ZU5+ZU5+GT4    | 1232 | LOC107327653      | Eukaryota>Opisthokonta>Metazoa>Cnidaria | Acropora digitifera       | GCF_000222465.1 |
| XP_015747883.1 | RVT+DEATH+ZU5+ZU5+GT4    | 1238 | LOC107327653      | Eukaryota>Opisthokonta>Metazoa>Cnidaria | Acropora digitifera       | GCF_000222465.1 |
| XP_015765549.1 | GT4+ANK                  | 1083 | LOC107344415      | Eukaryota>Opisthokonta>Metazoa>Cnidaria | Acropora digitifera       | GCF_000222465.1 |
| XP_015765548.1 | GT4+ANK                  | 1084 | LOC107344415      | Eukaryota>Opisthokonta>Metazoa>Cnidaria | Acropora digitifera       | GCF_000222465.1 |
| XP_015780922.1 | GT4+GT4                  | 738  | LOC107358864      | Eukaryota>Opisthokonta>Metazoa>Cnidaria | Acropora digitifera       | GCF_000222465.1 |
| XP_015780923.1 | GT4+GT4                  | 738  | LOC107358864      | Eukaryota>Opisthokonta>Metazoa>Cnidaria | Acropora digitifera       | GCF_000222465.1 |
| XP_015760897.1 | GT4                      | 651  | LOC107340068      | Eukaryota>Opisthokonta>Metazoa>Cnidaria | Acropora digitifera       | GCF_000222465.1 |
| XP_015760896.1 | GT4                      | 652  | LOC107340068      | Eukaryota>Opisthokonta>Metazoa>Cnidaria | Acropora digitifera       | GCF_000222465.1 |
| XP_015748510.1 | GT4                      | 305  | LOC107328284      | Eukaryota>Opisthokonta>Metazoa>Cnidaria | Acropora digitifera       | GCF_000222465.1 |
| XP_015776097.1 | GT4                      | 305  | LOC107354170      | Eukaryota>Opisthokonta>Metazoa>Cnidaria | Acropora digitifera       | GCF_000222465.1 |
| XP_002599631.1 | GT4+GTPase-AIG           | 700  | BRAFLDRAFT_102570 | Eukaryota>Opisthokonta>Metazoa>Chordata | Branchiostoma floridae    | -               |
| XP_002586742.1 | GT4                      | 133  | BRAFLDRAFT_105740 | Eukaryota>Opisthokonta>Metazoa>Chordata | Branchiostoma floridae    | -               |
| XP_002606956.1 | GT4                      | 718  | BRAFLDRAFT_64952  | Eukaryota>Opisthokonta>Metazoa>Chordata | Branchiostoma floridae    | -               |
| XP_002592892.1 | GT4                      | 115  | BRAFLDRAFT_65478  | Eukaryota>Opisthokonta>Metazoa>Chordata | Branchiostoma floridae    | -               |
| XP_002605447.1 | GT4                      | 734  | BRAFLDRAFT_74262  | Eukaryota>Opisthokonta>Metazoa>Chordata | Branchiostoma floridae    | -               |
| XP_002598007.1 | GT4                      | 253  | BRAFLDRAFT_79766  | Eukaryota>Opisthokonta>Metazoa>Chordata | Branchiostoma floridae    | -               |
| XP_015747221.1 | GT4                      | 151  | LOC107326989      | Eukaryota>Opisthokonta>Metazoa>Cnidaria | Acropora digitifera       | GCF_000222465.1 |
| XP_015747315.1 | GT4                      | 232  | LOC107327073      | Eukaryota>Opisthokonta>Metazoa>Cnidaria | Acropora digitifera       | GCF_000222465.1 |
| XP_015748075.1 | GT4                      | 636  | LOC107327853      | Eukaryota>Opisthokonta>Metazoa>Cnidaria | Acropora digitifera       | GCF_000222465.1 |

| acc            | architecture             | len  | gen.name         | tax                                         | species                         | GCA             |
|----------------|--------------------------|------|------------------|---------------------------------------------|---------------------------------|-----------------|
| XP_015759886.1 | GT4                      | 685  | LOC107339155     | Eukaryota>Opisthokonta>Metazoa>Cnidaria     | Acropora digitifera             | GCF_000222465.1 |
| XP_015764084.1 | GT4+NACHT                | 901  | LOC107343052     | Eukaryota>Opisthokonta>Metazoa>Cnidaria     | Acropora digitifera             | GCF_000222465.1 |
| XP_015767948.1 | GT4                      | 201  | LOC107346661     | Eukaryota>Opisthokonta>Metazoa>Cnidaria     | Acropora digitifera             | GCF_000222465.1 |
| XP_015774918.1 | GT4+NACHT                | 1264 | LOC107353111     | Eukaryota>Opisthokonta>Metazoa>Cnidaria     | Acropora digitifera             | GCF_000222465.1 |
| XP_015777737.1 | GT4                      | 925  | LOC107355671     | Eukaryota>Opisthokonta>Metazoa>Cnidaria     | Acropora digitifera             | GCF_000222465.1 |
| XP_015748669.1 | GT4                      | 245  | LOC107328450     | Eukaryota>Opisthokonta>Metazoa>Cnidaria     | Acropora digitifera             | GCF_000222465.1 |
| XP_015750057.1 | GT4                      | 520  | LOC107329915     | Eukaryota>Opisthokonta>Metazoa>Cnidaria     | Acropora digitifera             | GCF_000222465.1 |
| XP_015754313.1 | GT4                      | 241  | LOC107333962     | Eukaryota>Opisthokonta>Metazoa>Cnidaria     | Acropora digitifera             | GCF_000222465.1 |
| XP_015761270.1 | GT4                      | 712  | LOC107340435     | Eukaryota>Opisthokonta>Metazoa>Cnidaria     | Acropora digitifera             | GCF_000222465.1 |
| XP_015770112.1 | GT4                      | 253  | LOC107348572     | Eukaryota>Opisthokonta>Metazoa>Cnidaria     | Acropora digitifera             | GCF_000222465.1 |
| XP_015771016.1 | GT4                      | 390  | LOC107349380     | Eukaryota>Opisthokonta>Metazoa>Cnidaria     | Acropora digitifera             | GCF_000222465.1 |
| XP_015771260.1 | GT4                      | 491  | LOC107349592     | Eukaryota>Opisthokonta>Metazoa>Cnidaria     | Acropora digitifera             | GCF_000222465.1 |
| XP_015772349.1 | GT4                      | 256  | LOC107350627     | Eukaryota>Opisthokonta>Metazoa>Cnidaria     | Acropora digitifera             | GCF_000222465.1 |
| XP_015777221.1 | GT4                      | 205  | LOC107355205     | Eukaryota>Opisthokonta>Metazoa>Cnidaria     | Acropora digitifera             | GCF_000222465.1 |
| XP_015778002.1 | GT4                      | 437  | LOC107355902     | Eukaryota>Opisthokonta>Metazoa>Cnidaria     | Acropora digitifera             | GCF_000222465.1 |
| XP_015779016.1 | GT4                      | 186  | LOC107356899     | Eukaryota>Opisthokonta>Metazoa>Cnidaria     | Acropora digitifera             | GCF_000222465.1 |
| XP_015780870.1 | GT4                      | 274  | LOC107358800     | Eukaryota>Opisthokonta>Metazoa>Cnidaria     | Acropora digitifera             | GCF_000222465.1 |
| AFD00853.1     | GT4                      | 431  | Mtc_2115         | Archaea>Euryarchaeota                       | Methanocella conradii HZ254     | GCA_000251105.1 |
| AGB33684.1     | GT4                      | 394  | Natpe_3933       | Archaea>Euryarchaeota                       | Natrinema pellirubrum DSM 15624 | GCA_000230735.3 |
| XP_015751533.1 | GT4+NACHT                | 797  | LOC107331457     | Eukaryota>Opisthokonta>Metazoa>Cnidaria     | Acropora digitifera             | GCF_000222465.1 |
| XP_015747435.1 | GT4+NACHT                | 357  | LOC107327199     | Eukaryota>Opisthokonta>Metazoa>Cnidaria     | Acropora digitifera             | GCF_000222465.1 |
| XP_015759313.1 | GT4+NACHT                | 988  | LOC107338581     | Eukaryota>Opisthokonta>Metazoa>Cnidaria     | Acropora digitifera             | GCF_000222465.1 |
| XP_015759411.1 | GT4+NACHT                | 1346 | LOC107338694     | Eukaryota>Opisthokonta>Metazoa>Cnidaria     | Acropora digitifera             | GCF_000222465.1 |
| XP_015769571.1 | GT4+NACHT                | 716  | LOC107348075     | Eukaryota>Opisthokonta>Metazoa>Cnidaria     | Acropora digitifera             | GCF_000222465.1 |
| XP_015773770.1 | GT4+APATPase             | 1843 | LOC107351981     | Eukaryota>Opisthokonta>Metazoa>Cnidaria     | Acropora digitifera             | GCF_000222465.1 |
| XP_015779460.1 | GT4+NACHT                | 537  | LOC107357334     | Eukaryota>Opisthokonta>Metazoa>Cnidaria     | Acropora digitifera             | GCF_000222465.1 |
| XP_015756756.1 | GT4+NACHT+NACHT          | 770  | LOC107336211     | Eukaryota>Opisthokonta>Metazoa>Cnidaria     | Acropora digitifera             | GCF_000222465.1 |
| XP_015764080.1 | GT4+NACHT                | 1168 | LOC107343052     | Eukaryota>Opisthokonta>Metazoa>Cnidaria     | Acropora digitifera             | GCF_000222465.1 |
| XP_015764069.1 | GT4+NACHT                | 1295 | LOC107343052     | Eukaryota>Opisthokonta>Metazoa>Cnidaria     | Acropora digitifera             | GCF_000222465.1 |
| XP_015770110.1 | GT4+APATPase+NACHT       | 1677 | LOC107348570     | Eukaryota>Opisthokonta>Metazoa>Cnidaria     | Acropora digitifera             | GCF_000222465.1 |
| XP_015749857.1 | GT4+PNPase+NABD-unk4     | 1031 | LOC107329706     | Eukaryota>Opisthokonta>Metazoa>Cnidaria     | Acropora digitifera             | GCF_000222465.1 |
| XP_015778949.1 | GT4+GT4                  | 1007 | LOC107356840     | Eukaryota>Opisthokonta>Metazoa>Cnidaria     | Acropora digitifera             | GCF_000222465.1 |
| XP_002610411.1 | GT4+DEATH                | 1032 | BRAFLDRAFT_72365 | Eukaryota>Opisthokonta>Metazoa>Chordata     | Branchiostoma floridae          | -               |
| XP_015768823.1 | GT4+DEATH                | 402  | LOC107347423     | Eukaryota>Opisthokonta>Metazoa>Cnidaria     | Acropora digitifera             | GCF_000222465.1 |
| XP_015761974.1 | SIG+GT4                  | 503  | LOC107341068     | Eukaryota>Opisthokonta>Metazoa>Cnidaria     | Acropora digitifera             | GCF_000222465.1 |
| XP_002599100.1 | GT4                      | 900  | BRAFLDRAFT_81765 | Eukaryota>Opisthokonta>Metazoa>Chordata     | Branchiostoma floridae          | -               |
| XP_002601934.1 | GT4                      | 652  | BRAFLDRAFT_86418 | Eukaryota>Opisthokonta>Metazoa>Chordata     | Branchiostoma floridae          | -               |
| XP_015753083.1 | SIG+GT4                  | 678  | LOC107332846     | Eukaryota>Opisthokonta>Metazoa>Cnidaria     | Acropora digitifera             | GCF_000222465.1 |
| XP_015770111.1 | SIG+GT4+NACHT            | 1452 | LOC107348571     | Eukaryota>Opisthokonta>Metazoa>Cnidaria     | Acropora digitifera             | GCF_000222465.1 |
| XP_015759562.1 | GT4                      | 954  | LOC107338825     | Eukaryota>Opisthokonta>Metazoa>Cnidaria     | Acropora digitifera             | GCF_000222465.1 |
| XP_015772173.1 | GT4                      | 684  | LOC107350460     | Eukaryota>Opisthokonta>Metazoa>Cnidaria     | Acropora digitifera             | GCF_000222465.1 |
| XP_015767496.1 | GT4+PNPase               | 423  | LOC107346243     | Eukaryota>Opisthokonta>Metazoa>Cnidaria     | Acropora digitifera             | GCF_000222465.1 |
| XP_002610420.1 | CARD+sGTP+DEATH+GT4      | 1671 | BRAFLDRAFT_72355 | Eukaryota>Opisthokonta>Metazoa>Chordata     | Branchiostoma floridae          | -               |
| XP_002601932.1 | CARD+sGTP+DEATH+GT4+CARD | 2070 | BRAFLDRAFT_86416 | Eukaryota>Opisthokonta>Metazoa>Chordata     | Branchiostoma floridae          | -               |
| XP_002606064.1 | GT4+TIR                  | 594  | BRAFLDRAFT_92083 | Eukaryota>Opisthokonta>Metazoa>Chordata     | Branchiostoma floridae          | -               |
| XP_015747743.1 | GT4+SidE                 | 864  | LOC107327511     | Eukaryota>Opisthokonta>Metazoa>Cnidaria     | Acropora digitifera             | GCF_000222465.1 |
| XP_015771496.1 | GT4+TPR+TPR+TPR+RVT      | 1988 | LOC107349827     | Eukaryota>Opisthokonta>Metazoa>Cnidaria     | Acropora digitifera             | GCF_000222465.1 |
| XP_015777375.1 | GT4+ANK                  | 878  | LOC107355332     | Eukaryota>Opisthokonta>Metazoa>Cnidaria     | Acropora digitifera             | GCF_000222465.1 |
| XP_006812785.1 | GT4+PIN+HEPN             | 648  | LOC102807894     | Eukaryota>Opisthokonta>Metazoa>Hemichordata | Saccoglossus kowalevskii        | GCF_000003605.2 |
| XP_002601187.1 | ImmLRR+LRR+sGTP+OTU+GT4  | 1577 | BRAFLDRAFT_75632 | Eukaryota>Opisthokonta>Metazoa>Chordata     | Branchiostoma floridae          | -               |
| XP_015779017.1 | GT4+RNA-Helicase+CXC     | 1910 | LOC107356900     | Eukaryota>Opisthokonta>Metazoa>Cnidaria     | Acropora digitifera             | GCF_000222465.1 |
| XP_015767918.1 | GT4+NACHT                | 1211 | LOC107346622     | Eukaryota>Opisthokonta>Metazoa>Cnidaria     | Acropora digitifera             | GCF_000222465.1 |

| acc            | architecture                                                                                                                  | len  | gen.name          | tax                                         | species                   | GCA             |
|----------------|-------------------------------------------------------------------------------------------------------------------------------|------|-------------------|---------------------------------------------|---------------------------|-----------------|
| XP_015747744.1 | GT4+GT4                                                                                                                       | 1044 | LOC107327512      | Eukaryota>Opisthokonta>Metazoa>Cnidaria     | Acropora digitifera       | GCF_000222465.1 |
| XP_006822589.1 | TM+TM+BetaPropeller+BetaPropeller+GT4+ANK+Immank+ANK+ANK+Immank+Immank+Immank                                                 | 3508 | LOC102803126      | Eukaryota>Opisthokonta>Metazoa>Hemichordata | Saccoglossus kowalevskii  | GCF_000003605.2 |
| XP_002608839.1 | DED+DED+OTU+GT4+DEATH                                                                                                         | 1285 | BRAFLDRAFT_89707  | Eukaryota>Opisthokonta>Metazoa>Chordata     | Branchiostoma floridae    | -               |
| XP_002602261.1 | ANK+DEATH+GT4                                                                                                                 | 983  | BRAFLDRAFT_76949  | Eukaryota>Opisthokonta>Metazoa>Chordata     | Branchiostoma floridae    | -               |
| XP_006824651.1 | SIG+EGF+EGF+EGF+CLECTIN+GT4                                                                                                   | 945  | LOC102808514      | Eukaryota>Opisthokonta>Metazoa>Hemichordata | Saccoglossus kowalevskii  | GCF_000003605.2 |
| XP_015754275.1 | GT4+GT4+APATPase+TPR                                                                                                          | 1815 | LOC107333926      | Eukaryota>Opisthokonta>Metazoa>Cnidaria     | Acropora digitifera       | GCF_000222465.1 |
| XP_015764809.1 | GT4+DEATH                                                                                                                     | 660  | LOC107343733      | Eukaryota>Opisthokonta>Metazoa>Cnidaria     | Acropora digitifera       | GCF_000222465.1 |
| XP_015763304.1 | GT4+CR-ATPase4+TPR                                                                                                            | 1073 | LOC107342333      | Eukaryota>Opisthokonta>Metazoa>Cnidaria     | Acropora digitifera       | GCF_000222465.1 |
| XP_015765336.1 | GT4+UBI+UBI+UBI+UBI                                                                                                           | 1194 | LOC107344209      | Eukaryota>Opisthokonta>Metazoa>Cnidaria     | Acropora digitifera       | GCF_000222465.1 |
| XP_015765496.1 | GT4+CASPASE                                                                                                                   | 587  | LOC107344359      | Eukaryota>Opisthokonta>Metazoa>Cnidaria     | Acropora digitifera       | GCF_000222465.1 |
| XP_002601970.1 | DEATH+GT4                                                                                                                     | 1118 | BRAFLDRAFT_94541  | Eukaryota>Opisthokonta>Metazoa>Chordata     | Branchiostoma floridae    | -               |
| XP_015756490.1 | GT4+NACHT                                                                                                                     | 1270 | LOC107335955      | Eukaryota>Opisthokonta>Metazoa>Cnidaria     | Acropora digitifera       | GCF_000222465.1 |
| XP_015754270.1 | GT4+drhyd+NACHT                                                                                                               | 1358 | LOC107333920      | Eukaryota>Opisthokonta>Metazoa>Cnidaria     | Acropora digitifera       | GCF_000222465.1 |
| XP_015780567.1 | GT4+ANK                                                                                                                       | 1294 | LOC107358478      | Eukaryota>Opisthokonta>Metazoa>Cnidaria     | Acropora digitifera       | GCF_000222465.1 |
| XP_015748771.1 | GT4+TM+TM                                                                                                                     | 876  | LOC107328563      | Eukaryota>Opisthokonta>Metazoa>Cnidaria     | Acropora digitifera       | GCF_000222465.1 |
| XP_002606060.1 | GT4+DED+DED+DED+DED                                                                                                           | 1082 | BRAFLDRAFT_92079  | Eukaryota>Opisthokonta>Metazoa>Chordata     | Branchiostoma floridae    | -               |
| XP_015764066.1 | GT4+NACHT                                                                                                                     | 1352 | LOC107343052      | Eukaryota>Opisthokonta>Metazoa>Cnidaria     | Acropora digitifera       | GCF_000222465.1 |
| XP_015754289.1 | GT4+ANK                                                                                                                       | 1133 | LOC107333936      | Eukaryota>Opisthokonta>Metazoa>Cnidaria     | Acropora digitifera       | GCF_000222465.1 |
| XP_002601931.1 | DEATH+GT4                                                                                                                     | 1086 | BRAFLDRAFT_86415  | Eukaryota>Opisthokonta>Metazoa>Chordata     | Branchiostoma floridae    | -               |
| XP_015765568.1 | SIG+ANK+GT4                                                                                                                   | 607  | LOC107344435      | Eukaryota>Opisthokonta>Metazoa>Cnidaria     | Acropora digitifera       | GCF_000222465.1 |
| XP_015771899.1 | SIG+GT4+NACHT+RVT                                                                                                             | 942  | LOC107350190      | Eukaryota>Opisthokonta>Metazoa>Cnidaria     | Acropora digitifera       | GCF_000222465.1 |
| XP_015759049.1 | GT4+TPR+TPR+TPR+sGTP+sGTP                                                                                                     | 2065 | LOC107338329      | Eukaryota>Opisthokonta>Metazoa>Cnidaria     | Acropora digitifera       | GCF_000222465.1 |
| XP_015765567.1 | GT4+ANK                                                                                                                       | 1016 | LOC107344434      | Eukaryota>Opisthokonta>Metazoa>Cnidaria     | Acropora digitifera       | GCF_000222465.1 |
| XP_002601929.1 | CARD+sGTP+DEATH+GT4+sGTP+DEATH+CARD                                                                                           | 3425 | BRAFLDRAFT_86413  | Eukaryota>Opisthokonta>Metazoa>Chordata     | Branchiostoma floridae    | -               |
| XP_002607644.1 | GT4+DEATH+Phytase-like+DEATH+DEATH+DEATH+ZNF+ZNF+CRN-ZnBind.csq+ZNF+ZNF                                                       | 3703 | BRAFLDRAFT_84667  | Eukaryota>Opisthokonta>Metazoa>Chordata     | Branchiostoma floridae    | -               |
| XP_002608763.1 | TPR+TPR+TPR+sGTP+DEATH+GT4                                                                                                    | 2376 | BRAFLDRAFT_73982  | Eukaryota>Opisthokonta>Metazoa>Chordata     | Branchiostoma floridae    | -               |
| XP_002606489.1 | SIG+ImmLRR+DEATH+GT4                                                                                                          | 791  | BRAFLDRAFT_91930  | Eukaryota>Opisthokonta>Metazoa>Chordata     | Branchiostoma floridae    | -               |
| XP_015759356.1 | APATPase+TPR+ZU5+ZU5+GT4                                                                                                      | 1494 | LOC107338634      | Eukaryota>Opisthokonta>Metazoa>Cnidaria     | Acropora digitifera       | GCF_000222465.1 |
| XP_015767926.1 | GT4+NACHT                                                                                                                     | 1234 | LOC107346634      | Eukaryota>Opisthokonta>Metazoa>Cnidaria     | Acropora digitifera       | GCF_000222465.1 |
| XP_006823290.1 | SIG+GT4+TM                                                                                                                    | 1015 | LOC102801620      | Eukaryota>Opisthokonta>Metazoa>Hemichordata | Saccoglossus kowalevskii  | GCF_000003605.2 |
| XP_015777279.1 | GT4+sGTP                                                                                                                      | 1178 | LOC107355250      | Eukaryota>Opisthokonta>Metazoa>Cnidaria     | Acropora digitifera       | GCF_000222465.1 |
| XP_015771245.1 | TPR+TPR+TPR+TPR+TPR+sGTP+GT4                                                                                                  | 1879 | LOC107349580      | Eukaryota>Opisthokonta>Metazoa>Cnidaria     | Acropora digitifera       | GCF_000222465.1 |
| XP_002601933.1 | sGTP+DEATH+GT4+sGTP+DEATH+GT4+CARD+sGTP+DEATH                                                                                 | 4075 | BRAFLDRAFT_86417  | Eukaryota>Opisthokonta>Metazoa>Chordata     | Branchiostoma floridae    | -               |
| XP_002601971.1 | SIG+CARD+sGTP+DEATH+GT4+CARD+sGTP+DEATH+DEATH                                                                                 | 3440 | BRAFLDRAFT_94542  | Eukaryota>Opisthokonta>Metazoa>Chordata     | Branchiostoma floridae    | -               |
| KXJ24237.1     | DED+GT4+GT4                                                                                                                   | 2343 | AC249_AIPGENE4704 | Eukaryota>Opisthokonta>Metazoa>Cnidaria     | Exaiptasia diaphana       | GCA_001417965.1 |
| XP_006814385.1 | DED+TM+GT4                                                                                                                    | 488  | LOC102807017      | Eukaryota>Opisthokonta>Metazoa>Hemichordata | Saccoglossus kowalevskii  | GCF_000003605.2 |
| XP_002592882.1 | SIG+ZU5+ZU5+GT4                                                                                                               | 930  | BRAFLDRAFT_117744 | Eukaryota>Opisthokonta>Metazoa>Chordata     | Branchiostoma floridae    | -               |
| XP_015778947.1 | GT4+ANK+ANK+ANK                                                                                                               | 1575 | LOC107356838      | Eukaryota>Opisthokonta>Metazoa>Cnidaria     | Acropora digitifera       | GCF_000222465.1 |
| XP_002609384.1 | SIG+LRR+sGTP+OTU+GT4+Phytase-like                                                                                             | 1519 | BRAFLDRAFT_86475  | Eukaryota>Opisthokonta>Metazoa>Chordata     | Branchiostoma floridae    | -               |
| XP_002606063.1 | GT4+GTPase-AIG                                                                                                                | 1278 | BRAFLDRAFT_92082  | Eukaryota>Opisthokonta>Metazoa>Chordata     | Branchiostoma floridae    | -               |
| XP_002601968.1 | ZNF+ZNF+ZNF+CARD+sGTP+DEATH+GT4                                                                                               | 1973 | BRAFLDRAFT_94539  | Eukaryota>Opisthokonta>Metazoa>Chordata     | Branchiostoma floridae    | -               |
| XP_015778866.1 | GT4+VWA                                                                                                                       | 1117 | LOC107356760      | Eukaryota>Opisthokonta>Metazoa>Cnidaria     | Acropora digitifera       | GCF_000222465.1 |
| XP_002592893.1 | SIG+DEATH+PspA+GT4                                                                                                            | 873  | BRAFLDRAFT_65479  | Eukaryota>Opisthokonta>Metazoa>Chordata     | Branchiostoma floridae    | -               |
| XP_002610413.1 | sGTP+DEATH+GT4+CARD+sGTP+sGTP+DEATH+GT4                                                                                       | 4179 | BRAFLDRAFT_72363  | Eukaryota>Opisthokonta>Metazoa>Chordata     | Branchiostoma floridae    | -               |
| XP_002599992.1 | GT4+TPR+TPR+TPR+TPR                                                                                                           | 1404 | BRAFLDRAFT_74113  | Eukaryota>Opisthokonta>Metazoa>Chordata     | Branchiostoma floridae    | -               |
| XP_002598016.1 | DEATH+sGTP+ZU5+GT4                                                                                                            | 2055 | BRAFLDRAFT_79758  | Eukaryota>Opisthokonta>Metazoa>Chordata     | Branchiostoma floridae    | -               |
| XP_015765571.1 | GT4+GT4                                                                                                                       | 1248 | LOC107344438      | Eukaryota>Opisthokonta>Metazoa>Cnidaria     | Acropora digitifera       | GCF_000222465.1 |
| XP_002608841.1 | DED+OTU+sGTP+ZU5+DEATH+DEATH+DED+OTU+CASPASE+sGTP+CASPASE+DED+DEATH+OTU+GT4+sGTP+OTU+GT4+DED+DEATH+CASPASE+sGTP+OTU+DED+DEATH | 7154 | BRAFLDRAFT_89710  | Eukaryota>Opisthokonta>Metazoa>Chordata     | Branchiostoma floridae    | -               |
| XP_015754687.1 | SIG+GT4+CR-ATPase4+TPR                                                                                                        | 1371 | LOC107334268      | Eukaryota>Opisthokonta>Metazoa>Cnidaria     | Acropora digitifera       | GCF_000222465.1 |
| XP_014535703.1 | GT4                                                                                                                           | 1299 | PDIP_38710        | Eukaryota>Opisthokonta>Fungi>Ascomycota     | Penicillium digitatum Pd1 | GCF_000315645.1 |
| XP_015767848.1 | GT4+NACHT                                                                                                                     | 1489 | LOC107346556      | Eukaryota>Opisthokonta>Metazoa>Cnidaria     | Acropora digitifera       | GCF_000222465.1 |

| acc            | architecture           | len  | gen.name          | tax                                         | species                  | GCA             |
|----------------|------------------------|------|-------------------|---------------------------------------------|--------------------------|-----------------|
| XP_002599095.1 | DEATH+sGTP+DEATH+GT4   | 1974 | BRAFLDRAFT_81759  | Eukaryota>Opisthokonta>Metazoa>Chordata     | Branchiostoma floridae   | -               |
| XP_015754268.1 | GT4+GT4+GT4+IG         | 2108 | LOC107333918      | Eukaryota>Opisthokonta>Metazoa>Cnidaria     | Acropora digitifera      | GCF_000222465.1 |
| XP_015747885.1 | RVT+DEATH+ZU5+ZU5+GT4  | 1158 | LOC107327653      | Eukaryota>Opisthokonta>Metazoa>Cnidaria     | Acropora digitifera      | GCF_000222465.1 |
| XP_015756824.1 | GT4+APATPase           | 727  | LOC107336267      | Eukaryota>Opisthokonta>Metazoa>Cnidaria     | Acropora digitifera      | GCF_000222465.1 |
| XP_015774399.1 | GT4+CASPASE+CASPASE    | 742  | LOC107352599      | Eukaryota>Opisthokonta>Metazoa>Cnidaria     | Acropora digitifera      | GCF_000222465.1 |
| XP_015752969.1 | GT4                    | 255  | LOC107332740      | Eukaryota>Opisthokonta>Metazoa>Cnidaria     | Acropora digitifera      | GCF_000222465.1 |
| XP_006819467.1 | GT4+TM+TM+Snf7         | 1062 | LOC102807364      | Eukaryota>Opisthokonta>Metazoa>Hemichordata | Saccoglossus kowalevskii | GCF_000003605.2 |
| XP_002602157.1 | DEATH+GT4              | 1248 | BRAFLDRAFT_97971  | Eukaryota>Opisthokonta>Metazoa>Chordata     | Branchiostoma floridae   | -               |
| XP_015774318.1 | PNPase+TPR+ZU5+ZU5+GT4 | 1563 | LOC107352503      | Eukaryota>Opisthokonta>Metazoa>Cnidaria     | Acropora digitifera      | GCF_000222465.1 |
| XP_006818589.1 | TM+GT4                 | 781  | LOC100368229      | Eukaryota>Opisthokonta>Metazoa>Hemichordata | Saccoglossus kowalevskii | GCF_000003605.2 |
| XP_015749947.1 | GT4+CASPASE+CASPASE    | 619  | LOC107329787      | Eukaryota>Opisthokonta>Metazoa>Cnidaria     | Acropora digitifera      | GCF_000222465.1 |
| XP_002610422.1 | sGTP+DEATH+GT4         | 1881 | BRAFLDRAFT_72353  | Eukaryota>Opisthokonta>Metazoa>Chordata     | Branchiostoma floridae   | -               |
| XP_009019645.1 | GT4                    | 717  | HELRODRAFT_161481 | Eukaryota>Opisthokonta>Metazoa>Annelida     | Helobdella robusta       | GCF_000326865.1 |
| XP_015748178.1 | GT4                    | 374  | LOC107327971      | Eukaryota>Opisthokonta>Metazoa>Cnidaria     | Acropora digitifera      | GCF_000222465.1 |
| XP_015750171.1 | GT4                    | 397  | LOC107330034      | Eukaryota>Opisthokonta>Metazoa>Cnidaria     | Acropora digitifera      | GCF_000222465.1 |
| XP_015750733.1 | GT4                    | 186  | LOC107330680      | Eukaryota>Opisthokonta>Metazoa>Cnidaria     | Acropora digitifera      | GCF_000222465.1 |
| XP_015760591.1 | ZU5+GT4                | 573  | LOC107339792      | Eukaryota>Opisthokonta>Metazoa>Cnidaria     | Acropora digitifera      | GCF_000222465.1 |
| XP_002731836.1 | GT4                    | 901  | LOC100368975      | Eukaryota>Opisthokonta>Metazoa>Hemichordata | Saccoglossus kowalevskii | GCF_000003605.2 |
| XP_006814349.1 | GT4                    | 1053 | LOC102800835      | Eukaryota>Opisthokonta>Metazoa>Hemichordata | Saccoglossus kowalevskii | GCF_000003605.2 |
| XP_006811676.1 | GT4                    | 814  | LOC102807814      | Eukaryota>Opisthokonta>Metazoa>Hemichordata | Saccoglossus kowalevskii | GCF_000003605.2 |

Source data. Gene neighborhoods and domain architectures of the MNS-like STAND domains (nSTAND2) that is present in a 2-gene operon system each containing a STAND NTPase

| acc          | operon                                                      | architecture           | len | gen.name     | taxend              | species                                            | define                                                                    | gca             |
|--------------|-------------------------------------------------------------|------------------------|-----|--------------|---------------------|----------------------------------------------------|---------------------------------------------------------------------------|-----------------|
| AZF56106.1   | ??+STAND+wHTH→ nSTAND2+wHTH+TPRs+HEPN*→                     | nSTAND2+wHTH+TPRs+HEPN | 621 | C4J84_0196   | Gammaproteobacteria | <i>Pseudomonas</i> sp. R11-23-07                   | hypothetical protein C4J84_0196 [Pseudomonas sp. R11-23-07].              | GCA_003852295.1 |
| EEV8712171.1 | ??+STAND+wHTH→ nSTAND2+wHTH+TPRs+HEPN*→                     | nSTAND2+wHTH+TPRs+HEPN | 596 | EHU50_23110  | Gammaproteobacteria | <i>Escherichia coli</i>                            | hypothetical protein EHU50_23110, partial [Escherichia coli].             | GCA_012057895.1 |
| EEZ9035304.1 | ??+STAND+wHTH→ nSTAND2+wHTH*→                               | nSTAND2+wHTH           | 308 | C2D11_004496 | Gammaproteobacteria | <i>Escherichia coli</i> O75                        | hypothetical protein C2D11_004496, partial [Escherichia coli O75].        | GCA_012229525.1 |
| KAA9385705.1 | nSTAND2+wHTH+TPRs+HEPN*→                                    | nSTAND2+wHTH+TPRs+HEPN | 533 | F4V88_04125  | Alphaproteobacteria | <i>Neorhizobium galegae</i>                        | hypothetical protein F4V88_04125 [Neorhizobium galegae].                  | GCA_008728145.1 |
| KPX30733.1   | ??+STAND+wHTH→ nSTAND2+wHTH+TPRs+HEPN*→                     | nSTAND2+wHTH+TPRs+HEPN | 621 | ALO77_200057 | Gammaproteobacteria | <i>Pseudomonas coronafaciens</i> pv. <i>garcae</i> | hypothetical protein ALO77_200057 [Pseudomonas coronafaciens pv. garcae]. | GCA_001400345.1 |
| KQY48570.1   | nSTAND2+wHTH+TPRs+HEPN*→                                    | nSTAND2+wHTH+TPRs+HEPN | 547 | ASD32_09250  | Alphaproteobacteria | <i>Rhizobium</i> sp. Root483D2                     | hypothetical protein ASD32_09250 [Rhizobium sp. Root483D2].               | GCA_001426685.1 |
| KYF49123.1   | ??+STAND+wHTH→ nSTAND2+wHTH+TPRs+HEPN*→                     | nSTAND2+wHTH+TPRs+HEPN | 636 | BE08_43115   | Deltaproteobacteria | <i>Sorangium cellulorum</i>                        | hypothetical protein BE08_43115 [Sorangium cellulorum].                   | GCA_001589265.1 |
| MBA3548110.1 | ??+STAND+wHTH→ nSTAND2+wHTH+TPRs+HEPN*→ Integrin_beta(vWA)→ | nSTAND2+wHTH+TPRs+HEPN | 632 | H0T76_16635  | Deltaproteobacteria | <i>Nannocystis</i> sp.                             | hypothetical protein H0T76_16635 [Nannocystis sp.].                       | GCA_013812955.1 |
| OJX80461.1   | nSTAND2+wHTH+TPRs+HEPN*→  <-??                              | nSTAND2+wHTH+TPRs+HEPN | 533 | BGO93_00115  | Alphaproteobacteria | <i>Mesorhizobium</i> sp. 65-26                     | hypothetical protein BGO93_00115 [Mesorhizobium sp. 65-26].               | GCA_001899205.1 |
| PMZ92294.1   | ??+STAND+wHTH→ nSTAND2+wHTH+TPRs+HEPN*→ PSE→??→             | nSTAND2+wHTH+TPRs+HEPN | 621 | C1X61_03125  | Gammaproteobacteria | <i>Pseudomonas</i> sp. FW215-T2                    | hypothetical protein C1X61_03125 [Pseudomonas sp. FW215-T2].              | GCA_002883935.1 |
| POD52929.1   | ??+STAND+wHTH→ nSTAND2+wHTH+TPRs+HEPN*→                     | nSTAND2+wHTH+TPRs+HEPN | 590 | BKM15_13675  | Gammaproteobacteria | <i>Pseudomonas syringae</i> pv. <i>syringae</i>    | hypothetical protein BKM15_13675 [Pseudomonas syringae pv. syringae].     | GCA_002905935.1 |
| PWI54427.1   | nSTAND2+wHTH+TPRs+HEPN*→                                    | nSTAND2+wHTH+TPRs+HEPN | 532 | B5K03_09585  | Alphaproteobacteria | <i>Rhizobium phaseoli</i>                          | hypothetical protein B5K03_09585 [Rhizobium phaseoli].                    | GCA_003150695.1 |
| PZX00307.1   | ??+STAND+wHTH→ nSTAND2+wHTH+TPRs+HEPN*→                     | nSTAND2+wHTH+TPRs+HEPN | 621 | DFS28_10221  | Gammaproteobacteria | <i>Pseudomonas</i> sp. 478                         | hypothetical protein DFS28_10221 [Pseudomonas sp. 478].                   | GCA_003254125.1 |
| RCM87736.1   | ??+STAND+wHTH→ nSTAND2+wHTH+TPRs+HEPN*→                     | nSTAND2+wHTH+TPRs+HEPN | 588 | PA57_04301   | Gammaproteobacteria | <i>Pseudomonas aeruginosa</i>                      | hypothetical protein PA57_04301 [Pseudomonas aeruginosa].                 | GCA_003332525.1 |
| RMG61681.1   | Membrane-bound-b-barrel→ STAND+wHTH*→ Pkinase+cNMP_cyclase→ | STAND+wHTH             | 408 | D6715_13175  | Calditrichaeota     | <i>Calditrichaeota</i> bacterium                   | ATP-binding protein [Calditrichaeota bacterium].                          | GCA_003696445.1 |
| RMS07982.1   | ??+STAND+wHTH→ nSTAND2+wHTH+TPRs+HEPN*→                     | nSTAND2+wHTH+TPRs+HEPN | 621 | ALP73_02675  | Gammaproteobacteria | <i>Pseudomonas coronafaciens</i> pv. <i>garcae</i> | hypothetical protein ALP73_02675 [Pseudomonas coronafaciens pv. garcae].  | GCA_003701555.1 |
| RWN51709.1   | ??+STAND+wHTH→ nSTAND2+wHTH+TPRs+HEPN*→                     | nSTAND2+wHTH+TPRs+HEPN | 599 | EOR98_25445  | Alphaproteobacteria | <i>Mesorhizobium</i> sp.                           | hypothetical protein EOR98_25445 [Mesorhizobium sp.].                     | GCA_004020775.1 |
| RYG89382.1   | ??→??+STAND+wHTH→ nSTAND2+wHTH+TPRs+HEPN*→                  | nSTAND2+wHTH+TPRs+HEPN | 629 | EON59_01575  | Alphaproteobacteria | Alphaproteobacteria bacterium                      | hypothetical protein EON59_01575 [Alphaproteobacteria bacterium].         | GCA_004145145.1 |
| TIN07909.1   | ??+STAND+wHTH→ nSTAND2+wHTH+TPRs+HEPN*→                     | nSTAND2+wHTH+TPRs+HEPN | 599 | E5Y14_22895  | Alphaproteobacteria | <i>Mesorhizobium</i> sp.                           | hypothetical protein E5Y14_22895 [Mesorhizobium sp.].                     | GCA_004961475.1 |
| TIT02463.1   | ??+STAND+wHTH→ nSTAND2+wHTH+TPRs+HEPN*→                     | nSTAND2+wHTH+TPRs+HEPN | 596 | E5W87_09945  | Alphaproteobacteria | <i>Mesorhizobium</i> sp.                           | hypothetical protein E5W87_09945 [Mesorhizobium sp.].                     | GCA_004962925.1 |



| acc            | operon                                                                        | architecture           | len | gen.name    | taxend              | species                    | define                                                             | gca             |
|----------------|-------------------------------------------------------------------------------|------------------------|-----|-------------|---------------------|----------------------------|--------------------------------------------------------------------|-----------------|
| TJV17958.1     | ??+STAND+wHTH→ nSTAND2+wHTH+TPRs+HEPN*→                                       | nSTAND2+wHTH+TPRs+HEPN | 626 | E5Y07_09865 | Alphaproteobacteria | Mesorhizobium sp.          | hypothetical protein E5Y07_09865 [Mesorhizobium sp.].              | GCA_005046125.1 |
| WP_008322742.1 | ??+STAND+wHTH→ nSTAND2+wHTH+TPRs+HEPN*→  <-??                                 | nSTAND2+wHTH+TPRs+HEPN | 613 | -           | Gammaproteobacteria | Enterobacteriaceae         | MULTISPECIES: hypothetical protein [Enterobacteriaceae].           | GCF_000277565.1 |
| WP_026230868.1 | ??+STAND+wHTH→ nSTAND2+wHTH+TPRs+HEPN*→ SF2-helicase+DEAD_assoc→ Calcineurin→ | nSTAND2+wHTH+TPRs+HEPN | 637 | -           | Alphaproteobacteria | Rhizobium                  | MULTISPECIES: hypothetical protein [Rhizobium].                    | GCF_014138515.1 |
| WP_027196515.1 | ??+STAND→ nSTAND2+wHTH+GT4*→                                                  | nSTAND2+wHTH+GT4       | 760 | -           | Betaproteobacteria  | Paraburkholderia sprentiae | glycosyltransferase family 4 protein [Paraburkholderia sprentiae]. | GCF_001865575.1 |
| WP_048993481.1 | ??+STAND+wHTH→ nSTAND2+wHTH+TPRs+HEPN*→  <-??                                 | nSTAND2+wHTH+TPRs+HEPN | 613 | -           | Gammaproteobacteria | Klebsiella pneumoniae      | hypothetical protein [Klebsiella pneumoniae].                      | GCF_001065235.1 |
| WP_072160039.1 | nSTAND2+wHTH+TPRs+HEPN*→                                                      | nSTAND2+wHTH+TPRs+HEPN | 613 | -           | Gammaproteobacteria | Pluralibacter gergoviae    | hypothetical protein [Pluralibacter gergoviae].                    | GCF_001276415.1 |
| WP_088567149.1 | ??+STAND+wHTH→ nSTAND2+wHTH+TPRs+HEPN*→  <-??                                 | nSTAND2+wHTH+TPRs+HEPN | 613 | -           | Gammaproteobacteria | Enterobacter hormaechei    | hypothetical protein [Enterobacter hormaechei].                    | GCF_002208275.1 |
| WP_089463191.1 | ??+STAND→ nSTAND2+wHTH+GT4*→                                                  | nSTAND2+wHTH+GT4       | 768 | -           | Betaproteobacteria  | Burkholderia               | MULTISPECIES: glycosyltransferase [Burkholderia].                  | GCF_002924455.1 |
| WP_094198012.1 | ??+STAND→ nSTAND2+wHTH+GT4*→                                                  | nSTAND2+wHTH+GT4       | 756 | -           | Betaproteobacteria  | Alcaligenes faecalis       | glycosyltransferase family 4 protein [Alcaligenes faecalis].       | GCF_002242175.1 |
| WP_097401548.1 | nSTAND2+wHTH+TPRs+HEPN*→  <-??                                                | nSTAND2+wHTH+TPRs+HEPN | 613 | -           | Gammaproteobacteria | Enterobacteriaceae         | MULTISPECIES: hypothetical protein [Enterobacteriaceae].           | GCF_002510255.1 |
| WP_106119969.1 | ??+STAND→ nSTAND2+wHTH+GT4*→                                                  | nSTAND2+wHTH+GT4       | 736 | -           | Gammaproteobacteria | Pseudomonas simiae         | glycosyltransferase family 4 protein [Pseudomonas simiae].         | GCF_003001535.1 |
| WP_107112219.1 | ??+STAND+wHTH→ nSTAND2+wHTH+TPRs+HEPN*→  <-??                                 | nSTAND2+wHTH+TPRs+HEPN | 613 | -           | Gammaproteobacteria | Klebsiella quasipneumoniae | hypothetical protein [Klebsiella quasipneumoniae].                 | GCF_002854535.1 |
| WP_116343459.1 | ??+STAND+wHTH→ nSTAND2+wHTH+TPRs+HEPN*→  <-??                                 | nSTAND2+wHTH+TPRs+HEPN | 613 | -           | Gammaproteobacteria | Enterobacter cloacae       | hypothetical protein [Enterobacter cloacae].                       | GCF_003401145.1 |
| WP_122437975.1 | ??+STAND+wHTH→ nSTAND2+wHTH+TPRs+HEPN*→                                       | nSTAND2+wHTH+TPRs+HEPN | 621 | -           | Gammaproteobacteria | Pseudomonas viridiflava    | hypothetical protein [Pseudomonas viridiflava].                    | GCF_000580835.1 |
| WP_124434788.1 | ??+STAND+wHTH→ nSTAND2+wHTH+TPRs+HEPN*→                                       | nSTAND2+wHTH+TPRs+HEPN | 598 | -           | Gammaproteobacteria | Pseudomonas sp. R11-23-07  | hypothetical protein [Pseudomonas sp. R11-23-07].                  | GCF_003852295.1 |
| WP_127426060.1 | ??+STAND+wHTH→ nSTAND2+wHTH+TPRs+HEPN*→                                       | nSTAND2+wHTH+TPRs+HEPN | 606 | -           | Alphaproteobacteria | unclassified Mesorhizobium | MULTISPECIES: hypothetical protein [unclassified Mesorhizobium].   | GCF_004021725.2 |
| WP_132834030.1 | ??+STAND+wHTH→ nSTAND2+wHTH+TPRs+HEPN*→                                       | nSTAND2+wHTH+TPRs+HEPN | 598 | -           | Gammaproteobacteria | unclassified Pseudomonas   | MULTISPECIES: hypothetical protein [unclassified Pseudomonas].     | GCF_003254125.1 |
| WP_134049903.1 | ??+STAND+wHTH→ nSTAND2+wHTH+TPRs+HEPN*→                                       | nSTAND2+wHTH+TPRs+HEPN | 621 | -           | Gammaproteobacteria | Pseudomonas sp. OV144      | hypothetical protein [Pseudomonas sp. OV144].                      | GCF_004368835.1 |
| WP_139645958.1 | ??+STAND+wHTH→ nSTAND2+wHTH+TPRs+HEPN*→                                       | nSTAND2+wHTH+TPRs+HEPN | 623 | -           | Gammaproteobacteria | Pseudomonas sp. ICMP22404  | hypothetical protein [Pseudomonas sp. ICMP22404].                  | GCF_006227205.1 |
| WP_145962680.1 | ??+STAND+wHTH→ nSTAND2+wHTH+TPRs+HEPN*→                                       | nSTAND2+wHTH+TPRs+HEPN | 592 | -           | Alphaproteobacteria | Rhizobium phaseoli         | hypothetical protein [Rhizobium phaseoli].                         | GCF_003150695.1 |
| WP_146023689.1 | ??+STAND+wHTH→ nSTAND2+wHTH+TPRs+HEPN*→ PSE→??→                               | nSTAND2+wHTH+TPRs+HEPN | 598 | -           | Gammaproteobacteria | unclassified Pseudomonas   | MULTISPECIES: hypothetical protein [unclassified Pseudomonas].     | GCF_002884305.1 |
| WP_147262087.1 | ??+STAND+wHTH→ nSTAND2+wHTH+TPRs+HEPN*→                                       | nSTAND2+wHTH+TPRs+HEPN | 612 | -           | Gammaproteobacteria | Pseudomonas aeruginosa     | hypothetical protein [Pseudomonas aeruginosa].                     | GCF_003332525.1 |
| WP_147467220.1 | nSTAND2+wHTH+TPRs+HEPN*→                                                      | nSTAND2+wHTH+TPRs+HEPN | 486 | -           | Gammaproteobacteria | Pseudomonas coronafaciens  | hypothetical protein [Pseudomonas coronafaciens].                  | GCF_003700475.1 |
| WP_147475620.1 | nSTAND2+wHTH+TPRs+HEPN*→                                                      | nSTAND2+wHTH+TPRs+HEPN | 486 | -           | Gammaproteobacteria | Pseudomonas coronafaciens  | hypothetical protein [Pseudomonas coronafaciens].                  | GCF_001400345.1 |
| WP_153438665.1 | ??+STAND+wHTH→ nSTAND2+wHTH+TPRs+HEPN*→                                       | nSTAND2+wHTH+TPRs+HEPN | 620 | -           | Gammaproteobacteria | Pseudomonas helleri        | hypothetical protein [Pseudomonas helleri].                        | GCF_009600265.1 |
| WP_156383024.1 | ??→ STAND+wHTH→ nSTAND2+wHTH+TPRs+HEPN*→                                      | nSTAND2+wHTH+TPRs+HEPN | 602 | -           | Alphaproteobacteria | Rhizobium sp. Root483D2    | hypothetical protein [Rhizobium sp. Root483D2].                    | GCF_001426685.1 |

| acc            | operon                                  | architecture           | len | gen.name | taxend              | species                   | define                                                  | gca             |
|----------------|-----------------------------------------|------------------------|-----|----------|---------------------|---------------------------|---------------------------------------------------------|-----------------|
| WP_160320279.1 | nSTAND2(fragment)*→                     | nSTAND2(fragment)      | 113 | -        | Alphaproteobacteria | Rhizobium ecuadorensis    | hypothetical protein, partial [Rhizobium ecuadorensis]. | GCF_001187535.1 |
| WP_160610812.1 | ??+STAND+wHTH→ nSTAND2+wHTH+TPRs+HEPN*→ | nSTAND2+wHTH+TPRs+HEPN | 640 | -        | Alphaproteobacteria | Altererythrobacter aerius | hypothetical protein [Altererythrobacter aerius].       | GCF_009827495.1 |
| WP_163011207.1 | ??+STAND+wHTH→ nSTAND2+wHTH+TPRs+HEPN*→ | nSTAND2+wHTH+TPRs+HEPN | 621 | -        | Gammaproteobacteria | Pseudomonas viridiflava   | hypothetical protein [Pseudomonas viridiflava].         | GCF_900582025.1 |
| WP_163014645.1 | nSTAND2+wHTH+TPRs+HEPN*→                | nSTAND2+wHTH+TPRs+HEPN | 560 | -        | Gammaproteobacteria | Pseudomonas viridiflava   | hypothetical protein [Pseudomonas viridiflava].         | GCF_900582435.1 |
| WP_164708313.1 | nSTAND2+wHTH+TPRs+HEPN*→                | nSTAND2+wHTH+TPRs+HEPN | 534 | -        | Gammaproteobacteria | Pseudomonas viridiflava   | hypothetical protein [Pseudomonas viridiflava].         | GCF_900602385.1 |
| WP_169852212.1 | ??+STAND+wHTH→ nSTAND2+wHTH+TPRs+HEPN*→ | nSTAND2+wHTH+TPRs+HEPN | 623 | -        | Gammaproteobacteria | Pseudomonas proteolytica  | hypothetical protein [Pseudomonas proteolytica].        | GCF_012985975.1 |

Source data. Gene neighborhoods and domain architectures of prokaryotic AP-GTPases described in the text

| acc        | operon                                                                                                                            | architecture                        | len  | gen.name       | taxend              | species                              | define                                                                      | gca             |
|------------|-----------------------------------------------------------------------------------------------------------------------------------|-------------------------------------|------|----------------|---------------------|--------------------------------------|-----------------------------------------------------------------------------|-----------------|
| AAU84033.1 | pc1599→ Cluster1746_2clades→ Calcineurin→  <-tRNA  LRR-repeats+AP-GTPase+COR+TM+TM*→?→?→                                          | LRR-repeats+AP-GTPase+COR+TM+TM     | 737  | GZ35D7_19      | Archaea             | uncultured archaeon                  | leucine-rich-repeat protein [uncultured archaeon GZfos35D7].                | -               |
| AAX07516.1 | Aminotran_1_2→  <-?<-?<-?  Cluster1483_2clades→<br>LRR-repeats+AP-GTPase+COR*→                                                    | LRR-repeats+AP-GTPase+COR           | 1016 | -              | Planctomycetes      | Gemmata sp. Wa1-1                    | GTP-binding protein [Gemmata sp. Wa1-1].                                    | -               |
| ABD75797.1 | HISKIN→ LRR-repeats+AP-GTPase+COR+EAD8*→ HISKIN→?→  <-?  Cluster1512_2clades→ TetR-HTH→?→ Ferredoxin-RRM→                         | LRR-repeats+AP-GTPase+COR+EAD8      | 847  | -              | Bacteria            | uncultured bacterium                 | hypothetical protein [uncultured bacterium].                                | -               |
| ACC84329.1 | <-Arginase<-?<-?<-?  LRR-repeats+AP-GTPase+COR+TIR*→                                                                              | LRR-repeats+AP-GTPase+COR+TIR       | 1109 | Npun_F6039     | Cyanobacteria       | Nostoc punctiforme PCC 73102         | Miro domain protein [Nostoc punctiforme PCC 73102].                         | GCA_000020025.1 |
| ADB42932.1 | SIG+TM+TM+TM+HISKIN→?→  <-?  CENPB→?→ Cluster2094_2clades→<br>LRR-repeats+AP-GTPase+COR*→  <-?<-?<-?<-?<-?  ParA-Soj-PloopNTPase→ | LRR-repeats+AP-GTPase+COR           | 925  | Slin_6989      | Bacteroidetes       | Spirosoma linguale DSM 74            | small GTP-binding protein (plasmid) [Spirosoma linguale DSM 74].            | GCA_000024525.1 |
| AEE53900.1 | 35exo→  <-?<-?  ?→?→?→ LRR-repeats+AP-GTPase+COR+TIR*→  <-?<-?<-ABC-ATPase+APATPase+ABC-ATPase<-?  SIGMA-HTH→                     | LRR-repeats+AP-GTPase+COR+TIR       | 998  | Halhy_6078     | Bacteroidetes       | Haliscomenobacter hydrossis DSM 1100 | small GTP-binding protein [Haliscomenobacter hydrossis DSM 1100].           | GCA_000212735.1 |
| AEE54359.1 | LRR-repeats+AP-GTPase+COR+TIR*→ LRR-repeats+AP-GTPase+COR→ LRR-repeats+AP-GTPase+COR→                                             | LRR-repeats+AP-GTPase+COR+TIR       | 1058 | Halhy_6543     | Bacteroidetes       | Haliscomenobacter hydrossis DSM 1100 | Miro domain protein [Haliscomenobacter hydrossis DSM 1100].                 | GCA_000212735.1 |
| AEE54482.1 | LRR-repeats+AP-GTPase+COR+EAD11*→                                                                                                 | LRR-repeats+AP-GTPase+COR+EAD11     | 1141 | Halhy_6666     | Bacteroidetes       | Haliscomenobacter hydrossis DSM 1100 | small GTP-binding protein (plasmid) [Haliscomenobacter hydrossis DSM 1100]. | GCA_000212735.1 |
| AEE54508.1 | MACRODOMAIN→?→ LRR-repeats+AP-GTPase+COR+EAD11*→                                                                                  | LRR-repeats+AP-GTPase+COR+EAD11     | 1023 | Halhy_6692     | Bacteroidetes       | Haliscomenobacter hydrossis DSM 1100 | Miro domain protein (plasmid) [Haliscomenobacter hydrossis DSM 1100].       | GCA_000212735.1 |
| AFY40133.1 | <-SIG+Trypsin+PDZ<-?  ?→?→ LRR-repeats+AP-GTPase+COR+TCAD2*→                                                                      | LRR-repeats+AP-GTPase+COR+TCAD2     | 918  | Lepto7376_3994 | Cyanobacteria       | Leptolyngbya sp. PCC 7376            | small GTP-binding protein [Leptolyngbya sp. PCC 7376].                      | GCA_000316605.1 |
| AFY57475.1 | EACC2+CASPASE+LRR-repeats+AP-GTPase*→ AP-GTPase+COR→                                                                              | EACC2+CASPASE+LRR-repeats+AP-GTPase | 982  | Riv7116_5077   | Cyanobacteria       | Rivularia sp. PCC 7116               | leucine-rich repeat (LRR) protein [Rivularia sp. PCC 7116].                 | GCA_000316665.1 |
| AKB24843.1 | <-HhH-RADC+JAB  ?→ NTP_transf_3→ LRR-repeats+AP-GTPase+COR→?→ LRR-repeats+AP-GTPase+COR*→                                         | LRR-repeats+AP-GTPase+COR           | 599  | MSMTP_1374     | Euryarchaeota       | Methanosarcina sp. MTP4              | E3 ubiquitin-protein ligase SspH2 [Methanosarcina sp. MTP4].                | GCA_000970045.1 |
| AKB47719.1 | LRR-repeats→ LRR-repeats+AP-GTPase+COR+TIR*→?→?→?→?→?→  <-TPR-repeats                                                             | LRR-repeats+AP-GTPase+COR+TIR       | 590  | MSKOL_1942     | Euryarchaeota       | Methanosarcina sp. Kolksee           | hypothetical protein MSKOL_1942 [Methanosarcina sp. Kolksee].               | GCA_000969945.1 |
| AKB51553.1 | LRR-repeats+AP-GTPase+COR*→                                                                                                       | LRR-repeats+AP-GTPase+COR           | 880  | MSBRW_2300     | Euryarchaeota       | Methanosarcina barkeri str. Wiesmoor | hypothetical protein MSBRW_2300 [Methanosarcina barkeri str. Wiesmoor].     | GCA_000969985.1 |
| AKB56819.1 | <-SIG+TPR+TPR+TPR+TPR+TPR+TPR  ?→  <-?  ?→?→?→?→ LRR-repeats+AP-GTPase+COR*→?→?→ PRTase→                                          | LRR-repeats+AP-GTPase+COR           | 880  | MSBR2_0303     | Euryarchaeota       | Methanosarcina barkeri 227           | hypothetical protein MSBR2_0303 [Methanosarcina barkeri 227].               | GCA_000970065.1 |
| AKJ07375.1 | Cluster971_2clades→?→  <-?<-?  LRR-repeats+AP-GTPase+COR+TIR*→?→  <-?<-?<-?  ?→  <-?<-SIG+Lysozyme                                | LRR-repeats+AP-GTPase+COR+TIR       | 873  | AA314_09001    | Deltaproteobacteria | Archangium gephyra                   | Chaperone protein DnaK [Archangium gephyra].                                | GCA_001027285.1 |
| AOY82617.1 | REC→  <-?<-HNH  REC→  <-TPR-repeats<-?  LRR-repeats→ LRR-repeats+AP-GTPase+COR*→ AP-GTPase+COR+TM+TM→                             | LRR-repeats+AP-GTPase+COR           | 252  | BJP36_24575    | Cyanobacteria       | Moorea producens JHB                 | hypothetical protein BJP36_24575 [Moorea producens JHB].                    | GCA_001854205.1 |
| AQR64774.1 | LRR-repeats+AP-GTPase+COR+TIR*→  <-?<-?<-MarR-HTH  ?→  <-MarR-HTH<-?  Thioredoxin→                                                | LRR-repeats+AP-GTPase+COR+TIR       | 1295 | BXU06_06620    | Betaproteobacteria  | Aquaspirillum sp. LM1                | hypothetical protein BXU06_06620 [Aquaspirillum sp. LM1].                   | GCA_002002905.1 |



| acc        | operon                                                                        | architecture                      | len  | gen.name         | taxend                          | species                                                | define                                                                                                                                               | gca             |
|------------|-------------------------------------------------------------------------------|-----------------------------------|------|------------------|---------------------------------|--------------------------------------------------------|------------------------------------------------------------------------------------------------------------------------------------------------------|-----------------|
| CCH96195.1 | LRR-repeats+AP-GTPase+COR+TM+TM*→                                             | LRR-repeats+AP-GTPase+COR+TM+TM   | 625  | MICAB_1690001    | Cyanobacteria                   | Microcystis aeruginosa PCC 9717                        | Leucine-rich-repeat protein (fragment) [Microcystis aeruginosa PCC 9717].                                                                            | GCA_000312165.1 |
| CCI18671.1 | LRR-repeats+AP-GTPase+COR*→ AP-GTPase+COR+TM+TM→                              | LRR-repeats+AP-GTPase+COR         | 302  | MICAF_4270008    | Cyanobacteria                   | Microcystis aeruginosa PCC 9807                        | Leucine-rich-repeat protein (fragment) [Microcystis aeruginosa PCC 9807].                                                                            | GCA_000312225.1 |
| CCQ52177.1 | LRR-repeats+AP-GTPase+COR*→                                                   | LRR-repeats+AP-GTPase+COR         | 620  | CWATWH8502_1464  | Cyanobacteria                   | Crocospaera watsonii WH 8502                           | Leucine-rich repeat [Crocospaera watsonii WH 8502].                                                                                                  | GCA_001039555.1 |
| CCQ56427.1 | LRR-repeats+AP-GTPase+COR*→  <-?<-?<-?  RelE→ CHTH→                           | LRR-repeats+AP-GTPase+COR         | 761  | CWATWH0005_5558  | Cyanobacteria                   | Crocospaera watsonii WH 0005                           | Leucine-rich repeat [Crocospaera watsonii WH 0005].                                                                                                  | GCA_001050835.1 |
| CCQ61794.1 | LRR-repeats+AP-GTPase+COR*→  <-?<-?  RelE→ CHTH→                              | LRR-repeats+AP-GTPase+COR         | 674  | CWATWH0401_3405  | Cyanobacteria                   | Crocospaera watsonii WH 0401                           | Leucine-rich repeat [Crocospaera watsonii WH 0401].                                                                                                  | GCA_001039615.1 |
| CCQ66314.1 | LRR-repeats+AP-GTPase+COR*→                                                   | LRR-repeats+AP-GTPase+COR         | 378  | CWATWH0402_4408  | Cyanobacteria                   | Crocospaera watsonii WH 0402                           | Leucine-rich repeat [Crocospaera watsonii WH 0402].                                                                                                  | GCA_001039635.1 |
| CDA78514.1 | LRR-repeats+AP-GTPase+COR*→                                                   | LRR-repeats+AP-GTPase+COR         | 1064 | BN558_01944      | Firmicutes                      | Clostridium sp. CAG:242                                | miro domain protein [Clostridium sp. CAG:242].                                                                                                       | GCA_000435455.1 |
| CDU15633.1 | LRR-repeats+AP-GTPase+COR*→                                                   | LRR-repeats+AP-GTPase+COR         | 1092 | VCR17J2_90139    | Gammaproteobacteria             | Vibrio sp. J2-17                                       | hypothetical protein VCR17J2_90139 [Vibrio sp. J2-17].                                                                                               | GCA_001244075.1 |
| CRH07284.1 | LRR-repeats+AP-GTPase+COR*→  <-?  ?→?→  <-?<-SIG+Lysozyme                     | LRR-repeats+AP-GTPase+COR         | 759  | MAGMO_3143       | Alphaproteobacteria             | Candidatus Magnetococcus massalia                      | Conserved protein of unknown function. Containing small GTP-binding domain and Leucine-rich repeat (LRR) domain [Candidatus Magnetococcus massalia]. | -               |
| EAM49963.1 | Cluster1136_2clades→?→  <-?  LRR-repeats→ LRR-repeats+AP-GTPase+COR*→         | LRR-repeats+AP-GTPase+COR         | 715  | CwatDRAFT_2830   | Cyanobacteria                   | Crocospaera watsonii WH 8501                           | Leucine-rich repeat [Crocospaera watsonii WH 8501].                                                                                                  | GCA_000167195.1 |
| EAY30117.1 | LRR-repeats→?→ LRR-repeats+AP-GTPase+COR*→                                    | LRR-repeats+AP-GTPase+COR         | 1165 | M23134_05450     | Bacteroidetes                   | Microscilla marina ATCC 23134                          | Rab family protein [Microscilla marina ATCC 23134].                                                                                                  | GCA_000169175.1 |
| EDN67620.1 | LRR-repeats+AP-GTPase+COR*→                                                   | LRR-repeats+AP-GTPase+COR         | 602  | BGP_2058         | Gammaproteobacteria             | Beggiatoa sp. PS                                       | leucine-rich-repeat protein [Beggiatoa sp. PS].                                                                                                      | GCA_000170715.1 |
| EDN68964.1 | LRR-repeats+AP-GTPase+COR*→                                                   | LRR-repeats+AP-GTPase+COR         | 833  | BGP_3136         | Gammaproteobacteria             | Beggiatoa sp. PS                                       | leucine-rich-repeat protein [Beggiatoa sp. PS].                                                                                                      | GCA_000170715.1 |
| EDX78020.1 | Cluster1415_2clades→?→  <-?  LRR-repeats→ LRR-repeats+AP-GTPase+COR+DUF4404*→ | LRR-repeats+AP-GTPase+COR+DUF4404 | 1115 | MC7420_7758      | Cyanobacteria                   | Coleofasciculus chthonoplastes PCC 7420                | Ras family, putative [Coleofasciculus chthonoplastes PCC 7420].                                                                                      | GCA_000155555.1 |
| EHJ11819.1 | LRR-repeats+AP-GTPase+COR*→  <-?<-?  RelE→ CHTH→                              | LRR-repeats+AP-GTPase+COR         | 674  | CWATWH0003_3458  | Cyanobacteria                   | Crocospaera watsonii WH 0003                           | Leucine-rich repeat [Crocospaera watsonii WH 0003].                                                                                                  | GCA_000235665.2 |
| EIG53576.1 | LRR-repeats+AP-GTPase+COR*→?→?→?→ Cluster1496_2clades→                        | LRR-repeats+AP-GTPase+COR         | 1279 | DesU5LDRAFT_1901 | Deltaproteobacteria             | Desulfovibrio sp. U5L                                  | small GTP-binding protein domain [Desulfovibrio sp. U5L].                                                                                            | GCA_000245055.1 |
| ESA34932.1 | LRR-repeats+AP-GTPase+COR+TM+TM*→                                             | LRR-repeats+AP-GTPase+COR+TM+TM   | 1002 | N836_14320       | Cyanobacteria                   | Leptolyngbya sp. Heron Island J                        | small gtp-binding protein [Leptolyngbya sp. Heron Island J].                                                                                         | GCA_000482245.1 |
| ESA35951.1 | <-NACHT<-?  LRR-repeats+AP-GTPase+COR+TIR*→                                   | LRR-repeats+AP-GTPase+COR+TIR     | 824  | N836_09535       | Cyanobacteria                   | Leptolyngbya sp. Heron Island J                        | small gtp-binding protein [Leptolyngbya sp. Heron Island J].                                                                                         | GCA_000482245.1 |
| ESA37051.1 | LRR-repeats+AP-GTPase+COR*→?→?→?→  <-Pentapeptide-repeats                     | LRR-repeats+AP-GTPase+COR         | 818  | N836_04700       | Cyanobacteria                   | Leptolyngbya sp. Heron Island J                        | small gtp-binding protein [Leptolyngbya sp. Heron Island J].                                                                                         | GCA_000482245.1 |
| ESQ09086.1 | LRR-repeats+AP-GTPase+COR+TIR*→                                               | LRR-repeats+AP-GTPase+COR+TIR     | 840  | N838_02740       | Gammaproteobacteria             | Thiohalocapsa sp. PB-PSB1                              | hypothetical protein N838_02740 [Thiohalocapsa sp. PB-PSB1].                                                                                         | GCA_000495615.1 |
| ETR72570.1 | Cluster1438_2clades→?→ LRR-repeats+AP-GTPase+COR+TIR*→ CCTBP→  <-REC          | LRR-repeats+AP-GTPase+COR+TIR     | 808  | OMM_01620        | Deltaproteobacteria             | Candidatus Magnetoglobus multicellularis str. Araruama | leucine-rich repeat-containing protein [Candidatus Magnetoglobus multicellularis str. Araruama].                                                     | GCA_000516475.1 |
| ETW97925.1 | LRR-repeats+AP-GTPase+COR+DUF4404*→?→  <-RNA-Helicase  ?→ SIG+BLBD→           | LRR-repeats+AP-GTPase+COR+DUF4404 | 767  | ETSY1_20835      | Nitrospinae/Tectomicrobia group | Candidatus Entotheonella factor                        | hypothetical protein ETSY1_20835, partial [Candidatus Entotheonella factor].                                                                         | GCA_000522425.1 |

| acc        | operon                                                                                                                                                             | architecture                    | len  | gen.name          | taxend                          | species                               | define                                                                                  | gca             |
|------------|--------------------------------------------------------------------------------------------------------------------------------------------------------------------|---------------------------------|------|-------------------|---------------------------------|---------------------------------------|-----------------------------------------------------------------------------------------|-----------------|
| ETX07308.1 | LRR-repeats+AP-GTPase+COR*→                                                                                                                                        | LRR-repeats+AP-GTPase+COR       | 513  | ETSY2_11950       | Nitrospinae/Tectomicrobia group | Candidatus Entotheonella gemina       | hypothetical protein ETSY2_11950, partial [Candidatus Entotheonella gemina].            | GCA_000522445.1 |
| GAK50293.1 | <-CR-REase5<-?<-Cluster1448_2clades<-Cluster1281_2clades  ?→ LRR-repeats+AP-GTPase*→ COR→                                                                          | LRR-repeats+AP-GTPase           | 420  | U14_01521         | Bacteria                        | Candidatus Moduliflexus flocculans    | leucine-rich-repeat protein [Candidatus Moduliflexus flocculans].                       | GCA_000739515.1 |
| GBE92899.1 | HISKIN→  <-?  ?→ LRR-repeats+AP-GTPase+COR*→                                                                                                                       | LRR-repeats+AP-GTPase+COR       | 946  | NCWK1_2658        | Cyanobacteria                   | Nostoc cycadae WK-1                   | leucine rich repeat (LRR)-containing protein [Nostoc cycadae WK-1].                     | GCA_002897135.1 |
| GCL40268.1 | LRR-repeats+AP-GTPase+COR*→                                                                                                                                        | LRR-repeats+AP-GTPase+COR       | 261  | SR1949_54040      | Cyanobacteria                   | Sphaerospermopsis reniformis          | small GTP-binding protein [Sphaerospermopsis reniformis].                               | GCA_005402885.1 |
| GEP41915.1 | SIG+TM→?→ LRR-repeats+AP-GTPase+COR*→                                                                                                                              | LRR-repeats+AP-GTPase+COR       | 809  | BGE01nite_12060   | Verrucomicrobia                 | Brevifollis gellanilyticus            | hypothetical protein BGE01nite_12060 [Brevifollis gellanilyticus].                      | GCA_007992435.1 |
| GFZ95281.1 | LRR-repeats+AP-GTPase+COR*→                                                                                                                                        | LRR-repeats+AP-GTPase+COR       | 911  | CYANOKiyG1_06360  | Cyanobacteria                   | Okeania sp. KiyG1                     | hypothetical protein CYANOKiyG1_06360 [Okeania sp. KiyG1].                              | GCA_014132355.1 |
| GFZ95952.1 | <-HhH-RADC+JAB<-?  LRR-repeats+AP-GTPase+COR*→                                                                                                                     | LRR-repeats+AP-GTPase+COR       | 747  | CYANOKiyG1_07050  | Cyanobacteria                   | Okeania sp. KiyG1                     | hypothetical protein CYANOKiyG1_07050 [Okeania sp. KiyG1].                              | GCA_014132355.1 |
| GGA29094.1 | <-RADICAL-SAM  ?→ REC→?→ LRR-repeats+AP-GTPase+COR*→  <-?<-NACHT+68TM-wHTH<-?  ?→  <-TPR-repeats<-HISKIN                                                           | LRR-repeats+AP-GTPase+COR       | 1395 | CYANOKiyG1_45460  | Cyanobacteria                   | Okeania sp. KiyG1                     | hypothetical protein CYANOKiyG1_45460 [Okeania sp. KiyG1].                              | GCA_014132355.1 |
| GGA48436.1 | LRR-repeats+AP-GTPase+COR*→?→ COR+TM+TM→  <-?<-?<-NUDIX  TPR-repeats→                                                                                              | LRR-repeats+AP-GTPase+COR       | 405  | CYANOKiyG1_67520  | Cyanobacteria                   | Okeania sp. KiyG1                     | hypothetical protein CYANOKiyG1_67520 [Okeania sp. KiyG1].                              | GCA_014132355.1 |
| GGD73013.1 | LRR-repeats+AP-GTPase+COR+TM+TM*→?→?→  <-?<-Cluster1601_2clades                                                                                                    | LRR-repeats+AP-GTPase+COR+TM+TM | 937  | GCM10011514_41350 | Bacteroidetes                   | Emticicia aquatilis                   | hypothetical protein GCM10011514_41350 [Emticicia aquatilis].                           | GCA_014644295.1 |
| GGU83059.1 | LRR-repeats+AP-GTPase+COR*→  <-?  ?→  <-?<-SIGMA-HTH<-?<-SIGMA-HTH                                                                                                 | LRR-repeats+AP-GTPase+COR       | 996  | GCM10010260_14720 | Actinobacteria                  | Streptomyces filipinensis             | hypothetical protein GCM10010260_14720 [Streptomyces filipinensis].                     | GCA_014649495.1 |
| HAA21349.1 | LRR-repeats+AP-GTPase+COR*→                                                                                                                                        | LRR-repeats+AP-GTPase+COR       | 805  | DCP28_22240       | Bacteroidetes                   | Cytophagales bacterium                | TPA: hypothetical protein DCP28_22240, partial [Cytophagales bacterium].                | GCA_003444325.1 |
| HAC62039.1 | ABC_membrane+ABC_tran→?→ LRR-repeats→                                                                                                                              | LRR-repeats+AP-GTPase+COR       | 852  | DCF68_00525       | Cyanobacteria                   | Cyanothece sp. UBA12306               | TPA: GTPase, partial [Cyanothece sp. UBA12306].                                         | GCA_003448685.1 |
| HAC64827.1 | LRR-repeats+AP-GTPase+COR*→  <-Cluster2488_2clades<-Cluster2227_2clades  ISOFLAVOMETHYLASE-HTH→<-METHYLASE<-?  LRR-repeats+AP-GTPase+COR+TM+TM*→?→  <-?<-?<-SWACOS | LRR-repeats+AP-GTPase+COR+TM+TM | 931  | DCF68_15170       | Cyanobacteria                   | Cyanothece sp. UBA12306               | TPA: GTPase [Cyanothece sp. UBA12306].                                                  | GCA_003448685.1 |
| HAG85135.1 | Ferredoxin-RRM→ LRR-repeats+AP-GTPase+COR*→                                                                                                                        | LRR-repeats+AP-GTPase+COR       | 819  | DCL61_29295       | Cyanobacteria                   | Cyanobacteria bacterium UBA12227      | TPA: GTPase [Cyanobacteria bacterium UBA12227].                                         | GCA_003450835.1 |
| HAP64559.1 | LRR-repeats+AP-GTPase+COR*→                                                                                                                                        | LRR-repeats+AP-GTPase+COR       | 754  | DCR93_35450       | Bacteroidetes                   | Cytophagales bacterium                | TPA: hypothetical protein DCR93_35450, partial [Cytophagales bacterium].                | GCA_003454975.1 |
| HAR63371.1 | LRR-repeats+AP-GTPase+COR*→                                                                                                                                        | LRR-repeats+AP-GTPase+COR       | 611  | DCS13_07910       | Terrabacteria group             | Candidatus Margulisbacteria bacterium | TPA: hypothetical protein DCS13_07910, partial [Candidatus Margulisbacteria bacterium]. | GCA_003475905.1 |
| HAS39197.1 | LRR-repeats+AP-GTPase+COR*→                                                                                                                                        | LRR-repeats+AP-GTPase+COR       | 1145 | DCS93_01900       | Bacteroidetes                   | Microscillaceae bacterium             | TPA: hypothetical protein DCS93_01900 [Microscillaceae bacterium].                      | GCA_003483885.1 |
| HAS43483.1 | LRR-repeats→?→?→  <-?  LRR-repeats+AP-GTPase+COR+EAD11*→  <-PAS+HISKIN                                                                                             | LRR-repeats+AP-GTPase+COR+EAD11 | 868  | DCS93_23590       | Bacteroidetes                   | Microscillaceae bacterium             | TPA: hypothetical protein DCS93_23590 [Microscillaceae bacterium].                      | GCA_003483885.1 |



| acc        | operon                                                                                       | architecture                    | len  | gen.name    | taxend                | species                               | define                                                                            | gca             |
|------------|----------------------------------------------------------------------------------------------|---------------------------------|------|-------------|-----------------------|---------------------------------------|-----------------------------------------------------------------------------------|-----------------|
| HCA94361.1 | LRR-repeats→ LRR-repeats+AP-GTPase+COR*→                                                     | LRR-repeats+AP-GTPase+COR       | 892  | DEP38_06745 | Cyanobacteria         | Cyanobacteria bacterium UBA9226       | TPA: hypothetical protein DEP38_06745, partial [Cyanobacteria bacterium UBA9226]. | GCA_003520045.1 |
| HCF17408.1 | LRR-repeats+AP-GTPase+COR+TIR*→ TM+TM+TM→                                                    | LRR-repeats+AP-GTPase+COR+TIR   | 737  | DEV96_05085 | Alphaproteobacteria   | Rhodospirillum rubrum                 | TPA: hypothetical protein DEV96_05085, partial [Rhodospirillum rubrum].           | GCA_003530895.1 |
| HCN30450.1 | LRR-repeats+AP-GTPase+COR*→                                                                  | LRR-repeats+AP-GTPase+COR       | 1024 | DIT64_17260 | Verrucomicrobia       | Verrucomicrobiales bacterium          | TPA: hypothetical protein DIT64_17260 [Verrucomicrobiales bacterium].             | GCA_003545395.1 |
| HCO95252.1 | LRR-repeats+AP-GTPase+COR*→                                                                  | LRR-repeats+AP-GTPase+COR       | 809  | DIU00_15100 | Planctomycetes        | Phycisphaerales bacterium             | TPA: hypothetical protein DIU00_15100 [Phycisphaerales bacterium].                | GCA_003533825.1 |
| HCQ19950.1 | LRR-repeats+AP-GTPase+COR*→?→  <-?<-?  TM→                                                   | LRR-repeats+AP-GTPase+COR       | 754  | DIU28_00335 | Cyanobacteria         | Anabaena sp. UBA12330                 | TPA: hypothetical protein DIU28_00335, partial [Anabaena sp. UBA12330].           | GCA_003525565.1 |
| HCQ20817.1 | LRR-repeats→ LRR-repeats+AP-GTPase+COR+TM+TM*→  <-?  ?→?→?→ ABC-ATPase→                      | LRR-repeats+AP-GTPase+COR+TM+TM | 721  | DIU28_04955 | Cyanobacteria         | Anabaena sp. UBA12330                 | TPA: hypothetical protein DIU28_04955, partial [Anabaena sp. UBA12330].           | GCA_003525565.1 |
| HCR54081.1 | LRR-repeats→ LRR-repeats+AP-GTPase+COR*→                                                     | LRR-repeats+AP-GTPase+COR       | 797  | DIW27_06670 | Bacteroidetes         | Cytophagales bacterium                | TPA: hypothetical protein DIW27_06670 [Cytophagales bacterium].                   | GCA_003524675.1 |
| HCS91704.1 | LRR-repeats+AP-GTPase+COR+TIR*→                                                              | LRR-repeats+AP-GTPase+COR+TIR   | 749  | DIW77_17080 | Gammaproteobacteria   | Chromatiaceae bacterium               | TPA: hypothetical protein DIW77_17080 [Chromatiaceae bacterium].                  | GCA_003525925.1 |
| HCT83732.1 | LRR-repeats+AP-GTPase+COR*→                                                                  | LRR-repeats+AP-GTPase+COR       | 585  | DF296_00860 | Terrabacteria group   | Candidatus Margulisbacteria bacterium | TPA: hypothetical protein DF296_00860 [Candidatus Margulisbacteria bacterium].    | GCA_003542625.1 |
| HCU95641.1 | LRR-repeats+AP-GTPase+COR*→                                                                  | LRR-repeats+AP-GTPase+COR       | 896  | DHU96_24175 | Actinobacteria        | Actinobacteria bacterium              | TPA: hypothetical protein DHU96_24175 [Actinobacteria bacterium].                 | GCA_003541285.1 |
| HDN27288.1 | LRR-repeats+AP-GTPase+COR*→                                                                  | LRR-repeats+AP-GTPase+COR       | 598  | ENG03_09385 | Gammaproteobacteria   | Thioploca sp.                         | TPA: GTP-binding protein, partial [Thioploca sp.].                                | GCA_011043325.1 |
| HEC83827.1 | LRR-repeats+AP-GTPase+COR*→                                                                  | LRR-repeats+AP-GTPase+COR       | 907  | ENI48_01075 | Gammaproteobacteria   | Thioploca sp.                         | TPA: GTPase [Thioploca sp.].                                                      | GCA_011052595.1 |
| HEG42537.1 | <-S1COLD  LRR-repeats+AP-GTPase+COR+TIR*→?→  <-SIG+Alba<-?  ?→?→ REC→                        | LRR-repeats+AP-GTPase+COR       | 1095 | ENH94_00660 | Planctomycetes        | Phycisphaerales bacterium             | TPA: TIR domain-containing protein [Phycisphaerales bacterium].                   | GCA_011053245.1 |
| HER03270.1 | LRR-repeats+AP-GTPase+COR+TIR*→  <-?  ?→?→ Cluster1306_2clades→?→ SIG+TM→ RuvB-AAA+RuvB-HTH→ | LRR-repeats+AP-GTPase+COR+TIR   | 910  | ENR03_13235 | Alphaproteobacteria   | Rhizobiales bacterium                 | TPA: TIR domain-containing protein, partial [Rhizobiales bacterium].              | GCA_011046675.1 |
| HEU35175.1 | Cluster1718_2clades→ LRR-repeats+AP-GTPase+COR*→                                             | LRR-repeats+AP-GTPase+COR       | 718  | ENQ60_27120 | unclassified Bacteria | bacterium                             | TPA: GTP-binding protein, partial [bacterium].                                    | GCA_011047125.1 |
| HFB99816.1 | LRR-repeats+AP-GTPase+COR+TIR*→                                                              | LRR-repeats+AP-GTPase+COR+TIR   | 1132 | ENJ53_03320 | Bacteroidetes         | Phaeodactylibacter sp.                | TPA: TIR domain-containing protein, partial [Phaeodactylibacter sp.].             | GCA_011322485.1 |
| HFS07270.1 | Cluster1370_2clades→ LRR-repeats+AP-GTPase+COR+TIR*→  <-?  REase→                            | LRR-repeats+AP-GTPase+COR+TIR   | 1009 | ENR14_02795 | Cyanobacteria         | Anabaena sp.                          | TPA: TIR domain-containing protein [Anabaena sp.].                                | GCA_011332035.1 |
| HFS07901.1 | LRR-repeats+AP-GTPase+COR+TIR*→  <-?<-?<-ParA-Soj-PloopNTPase                                | LRR-repeats+AP-GTPase+COR+TIR   | 1021 | ENR14_06085 | Cyanobacteria         | Anabaena sp.                          | TPA: GTP-binding protein [Anabaena sp.].                                          | GCA_011332035.1 |
| HGZ29232.1 | LRR-repeats+AP-GTPase+COR*→                                                                  | LRR-repeats+AP-GTPase+COR       | 903  | ENR17_03505 | Bacteroidetes         | Bacteroidetes bacterium               | TPA: hypothetical protein ENR17_03505 [Bacteroidetes bacterium].                  | GCA_011331955.1 |



| acc          | operon                                                                                  | architecture                   | len  | gen.name     | taxend              | species                     | define                                                                    | gca             |
|--------------|-----------------------------------------------------------------------------------------|--------------------------------|------|--------------|---------------------|-----------------------------|---------------------------------------------------------------------------|-----------------|
| HGZ31593.1   | LRR-repeats+AP-GTPase+COR+TIR*→                                                         | LRR-repeats+AP-GTPase+COR+TIR  | 868  | ENR17_15550  | Bacteroidetes       | Bacteroidetes bacterium     | TPA: TIR domain-containing protein, partial [Bacteroidetes bacterium].    | GCA_011331955.1 |
| HHB79310.1   | FGS→?→ RVT→ LRR-repeats+AP-GTPase+COR*→                                                 | LRR-repeats+AP-GTPase+COR      | 458  | ENK85_08770  | Bacteroidetes       | Saprosiraceae bacterium     | TPA: hypothetical protein ENK85_08770, partial [Saprosiraceae bacterium]. | GCA_011371135.1 |
| HHH53255.1   | LRR-repeats+AP-GTPase+COR*→                                                             | LRR-repeats+AP-GTPase+COR      | 413  | ENK91_06320  | Bacteroidetes       | Bacteroidetes bacterium     | TPA: GTP-binding protein, partial [Bacteroidetes bacterium].              | GCA_011371025.1 |
| HHV24864.1   | LRR-repeats+AP-GTPase+COR*→                                                             | LRR-repeats+AP-GTPase+COR      | 716  | GXX65_10185  | Euryarchaeota       | Methanosarcina sp.          | TPA: GTP-binding protein [Methanosarcina sp.].                            | GCA_012839505.1 |
| HIE02480.1   | Cluster1917_2clades→?→?→?→?→  <-?  LRR-repeats+AP-GTPase+COR*→                          | LRR-repeats+AP-GTPase+COR      | 853  | EYP59_19720  | Gammaproteobacteria | Thiotrichaceae bacterium    | TPA: GTPase [Thiotrichaceae bacterium].                                   | GCA_012961805.1 |
| HIE31128.1   | LRR-repeats+AP-GTPase+COR*→                                                             | LRR-repeats+AP-GTPase+COR      | 636  | EYP67_01930  | Euryarchaeota       | Methanosarcinales archaeon  | TPA: GTP-binding protein, partial [Methanosarcinales archaeon].           | GCA_012961645.1 |
| III01375.1   | LRR-repeats+AP-GTPase+COR*→                                                             | LRR-repeats+AP-GTPase+COR      | 622  | HA351_06900  | Euryarchaeota       | Methanosarcinaceae archaeon | TPA: GTP-binding protein [Methanosarcinaceae archaeon].                   | GCA_013329415.1 |
| III91446.1   | <-HhH-RADC+JAB  ?→?→?→ NTP_transf_3→ LRR-repeats→ LRR-repeats+AP-GTPase+COR*→           | LRR-repeats+AP-GTPase+COR      | 672  | HA262_04570  | Euryarchaeota       | Methanosarcina sp.          | TPA: GTP-binding protein, partial [Methanosarcina sp.].                   | GCA_013331275.1 |
| III91684.1   | NTP_transf_3→ LRR-repeats+AP-GTPase+COR*→                                               | LRR-repeats+AP-GTPase+COR      | 735  | HA262_05815  | Euryarchaeota       | Methanosarcina sp.          | TPA: GTP-binding protein [Methanosarcina sp.].                            | GCA_013331275.1 |
| KAA3610009.1 | MORC→?→ LRR-repeats→ LRR-repeats+AP-GTPase+COR*→?→  <-?<-?<-BetaPropeller+BetaPropeller | LRR-repeats+AP-GTPase+COR      | 653  | DWQ03_18700  | Calditrichaeota     | Calditrichaeota bacterium   | hypothetical protein DWQ03_18700 [Calditrichaeota bacterium].             | GCA_008501795.1 |
| KAA3656070.1 | LRR-repeats+AP-GTPase+COR+EAD7*→                                                        | LRR-repeats+AP-GTPase+COR+EAD7 | 779  | DWQ04_32125  | Chloroflexi         | Chloroflexi bacterium       | GTPase, partial [Chloroflexi bacterium].                                  | GCA_008501785.1 |
| KAA3659887.1 | LRR-repeats+AP-GTPase+COR*→                                                             | LRR-repeats+AP-GTPase+COR      | 842  | DWQ04_20995  | Chloroflexi         | Chloroflexi bacterium       | GTPase [Chloroflexi bacterium].                                           | GCA_008501785.1 |
| KAB8152691.1 | <-HISKIN<-?  ?→?→ REC→ LRR-repeats+AP-GTPase+COR+TIR*→  <-RADICAL-SAM                   | LRR-repeats+AP-GTPase+COR+TIR  | 1007 | EZY14_012780 | Bacteroidetes       | Kordia sp.                  | TIR domain-containing protein [Kordia sp. TARA_039_SRF].                  | GCA_006383075.2 |
| KAB8153612.1 | LRR-repeats+AP-GTPase+COR+TIR*→  <-?<-?  ?→  <-?  TM+RHOMBOID→                          | LRR-repeats+AP-GTPase+COR+TIR  | 966  | EZY14_010295 | Bacteroidetes       | Kordia sp.                  | TIR domain-containing protein [Kordia sp. TARA_039_SRF].                  | GCA_006383075.2 |
| KAF0107167.1 | <-HISKIN<-REC  ?→?→?→?→ LRR-repeats+AP-GTPase+COR*→  <-SIG+GT4                          | LRR-repeats+AP-GTPase+COR      | 1065 | FD146_2008   | Chloroflexi         | Anaerolineaceae bacterium   | hypothetical protein FD146_2008 [Anaerolineaceae bacterium].              | GCA_009772985.1 |
| KAF5415978.1 | LRR-repeats+AP-GTPase+COR*→                                                             | LRR-repeats+AP-GTPase+COR      | 561  | C5S48_04205  | Euryarchaeota       | ANME-2 cluster archaeon     | hypothetical protein C5S48_04205 [ANME-2 cluster archaeon].               | GCA_013374355.1 |
| KAF5419007.1 | LRR-repeats+AP-GTPase+COR*→                                                             | LRR-repeats+AP-GTPase+COR      | 865  | C5S49_00980  | Euryarchaeota       | ANME-2 cluster archaeon     | hypothetical protein C5S49_00980 [ANME-2 cluster archaeon].               | GCA_013374365.1 |
| KAF5420469.1 | Cluster1076_2clades→ Cluster1076_2clades→ LRR-repeats+AP-GTPase+COR*→                   | LRR-repeats+AP-GTPase+COR      | 878  | C5S44_08435  | Euryarchaeota       | ANME-2 cluster archaeon     | hypothetical protein C5S44_08435 [ANME-2 cluster archaeon].               | GCA_013374455.1 |
| KAF5421986.1 | LRR-repeats+AP-GTPase+COR*→                                                             | LRR-repeats+AP-GTPase+COR      | 596  | C5S45_02955  | Euryarchaeota       | ANME-2 cluster archaeon     | hypothetical protein C5S45_02955, partial [ANME-2 cluster archaeon].      | GCA_013374465.1 |
| KAF5428813.1 | <-CBS<-CBS  ?→?→ LRR-repeats+AP-GTPase+COR*→                                            | LRR-repeats+AP-GTPase+COR      | 788  | C5S39_10445  | Euryarchaeota       | Methanophagales archaeon    | Leucine-rich repeat (LRR) protein [Methanophagales archaeon].             | GCA_013374505.1 |
| KAF5432496.1 | LRR-repeats+AP-GTPase+COR*→                                                             | LRR-repeats+AP-GTPase+COR      | 599  | C5S39_03480  | Euryarchaeota       | Methanophagales archaeon    | hypothetical protein C5S39_03480 [Methanophagales archaeon].              | GCA_013374505.1 |
| KAF5433375.1 | LRR-repeats+AP-GTPase+COR*→                                                             | LRR-repeats+AP-GTPase+COR      | 838  | C5S35_16480  | Euryarchaeota       | Methanophagales archaeon    | hypothetical protein C5S35_16480 [Methanophagales archaeon].              | GCA_013374565.1 |
| KAF5435535.1 | SIG+TM+TM+TM+TM+TM+TM→  <-?<-?  ?→?→ Aminotran_1_2→ LRR-repeats+AP-GTPase+COR*→         | LRR-repeats+AP-GTPase+COR      | 659  | C5S35_10775  | Euryarchaeota       | Methanophagales archaeon    | hypothetical protein C5S35_10775, partial [Methanophagales archaeon].     | GCA_013374565.1 |
| KAF5438029.1 | LRR-repeats+AP-GTPase+COR*→                                                             | LRR-repeats+AP-GTPase+COR      | 787  | C5S35_01055  | Euryarchaeota       | Methanophagales archaeon    | internalin A, partial [Methanophagales archaeon].                         | GCA_013374565.1 |
| KFF11476.1   | LRR-repeats+AP-GTPase+COR*→                                                             | LRR-repeats+AP-GTPase+COR      | 902  | IW20_19515   | Bacteroidetes       | Flavobacterium hydatis      | hypothetical protein IW20_19515 [Flavobacterium hydatis].                 | GCA_000737695.1 |

| acc        | operon                                                                                                                                   | architecture                              | len  | gen.name       | taxend              | species                          | define                                                                                                          | gca             |
|------------|------------------------------------------------------------------------------------------------------------------------------------------|-------------------------------------------|------|----------------|---------------------|----------------------------------|-----------------------------------------------------------------------------------------------------------------|-----------------|
| KJV08837.1 | LRR-repeats+AP-GTPase+COR*→                                                                                                              | LRR-repeats+AP-GTPase+COR                 | 553  | VZ95_15215     | Alphaproteobacteria | Elstera litoralis                | hypothetical protein VZ95_15215, partial [Elstera litoralis].                                                   | GCA_000963705.1 |
| KOR30146.1 | LRR-repeats+AP-GTPase+COR*→ SIG+RHOD-CDC25→                                                                                              | LRR-repeats+AP-GTPase+COR                 | 653  | TI04_06910     | Gammaproteobacteria | Achromatium sp. WMS2             | hypothetical protein TI04_06910 [Achromatium sp. WMS2].                                                         | GCA_001276605.1 |
| KPA09194.1 | HNH→?→?→?→?→ LRR-repeats+AP-GTPase+COR*→ McrA-NTD→?→ RlaP→ Cluster2261_2clades→                                                          | LRR-repeats+AP-GTPase+COR                 | 923  | MHK_010613     | Deltaproteobacteria | Candidatus Magnetomorum sp. HK-1 | Leucine Rich Repeat (LRR)-containing protein [Candidatus Magnetomorum sp. HK-1].                                | GCA_001292585.1 |
| KPA10003.1 | Cluster2271_2clades→ TPR+TPR→?→?→ LRR-repeats+AP-GTPase+COR+DUF4404*→                                                                    | LRR-repeats+AP-GTPase+COR+DUF4404         | 883  | MHK_009799     | Deltaproteobacteria | Candidatus Magnetomorum sp. HK-1 | small GTP-binding protein domain protein [Candidatus Magnetomorum sp. HK-1].                                    | GCA_001292585.1 |
| KPA12970.1 | LRR-repeats+AP-GTPase+COR*→                                                                                                              | LRR-repeats+AP-GTPase+COR                 | 676  | MHK_006822     | Deltaproteobacteria | Candidatus Magnetomorum sp. HK-1 | leucine-rich repeat-containing protein [Candidatus Magnetomorum sp. HK-1].                                      | GCA_001292585.1 |
| KPA13876.1 | TIR+LRR-repeats+AP-GTPase+COR+Calcineurin*→                                                                                              | TIR+LRR-repeats+AP-GTPase+COR+Calcineurin | 1426 | MHK_005915     | Deltaproteobacteria | Candidatus Magnetomorum sp. HK-1 | small gtp-binding protein [Candidatus Magnetomorum sp. HK-1].                                                   | GCA_001292585.1 |
| KPA14771.1 | LRR-repeats+AP-GTPase+COR+DrHyd*→                                                                                                        | LRR-repeats+AP-GTPase+COR+DrHyd           | 898  | MHK_005023     | Deltaproteobacteria | Candidatus Magnetomorum sp. HK-1 | leucine-rich repeat-containing protein [Candidatus Magnetomorum sp. HK-1].                                      | GCA_001292585.1 |
| KPA15132.1 | LRR-repeats+AP-GTPase+COR+TIR*→                                                                                                          | LRR-repeats+AP-GTPase+COR+TIR             | 1146 | MHK_004657     | Deltaproteobacteria | Candidatus Magnetomorum sp. HK-1 | small GTP-binding domain protein [Candidatus Magnetomorum sp. HK-1].                                            | GCA_001292585.1 |
| KPQ33355.1 | ARSR-HTH→ Cluster2335_2clades→  <?  LRR-repeats→ LRR-repeats+AP-GTPase+COR+TIR*→  <-METHYLASE  ?→  <-SIG+TM+TM+TM<-ABC_membrane+ABC_tran | LRR-repeats+AP-GTPase+COR+TIR             | 887  | HLUCCA11_18720 | Cyanobacteria       | Phormidesmis priestleyi Ana      | Leucine Rich repeats (2 copies)/TIR domain/Miro-like protein/Leucine rich repeat [Phormidesmis priestleyi Ana]. | GCA_001314865.1 |
| KPQ36660.1 | <-Cluster54_3clades<-?  LRR-repeats+AP-GTPase+COR*→                                                                                      | LRR-repeats+AP-GTPase+COR                 | 1200 | inlA           | Cyanobacteria       | Phormidesmis priestleyi Ana      | internalin A [Phormidesmis priestleyi Ana].                                                                     | GCA_001314865.1 |
| KTE25244.1 | TetR-HTH→?→  <-?<-?<-?<-?  LRR-repeats+AP-GTPase+COR+TIR*→                                                                               | LRR-repeats+AP-GTPase+COR+TIR             | 719  | ATE62_22325    | Alphaproteobacteria | Sphingopyxis sp. HIX             | hypothetical protein ATE62_22325 [Sphingopyxis sp. HIX].                                                        | GCA_001468285.1 |
| KTE72816.1 | TetR-HTH→?→  <-?<-?<-?<-?  LRR-repeats+AP-GTPase+COR+TIR*→                                                                               | LRR-repeats+AP-GTPase+COR+TIR             | 716  | ATE72_22070    | Alphaproteobacteria | Sphingopyxis sp. HXXIV           | hypothetical protein ATE72_22070 [Sphingopyxis sp. HXXIV].                                                      | GCA_001468305.1 |
| MAB62252.1 | Cluster1163_3clades→?→ Cluster1131_3clades→?→  <-?<-?  ?→ LRR-repeats+AP-GTPase+COR+TIR*→?→?→ METHYLASE→ ParA-Soj-PloopNTPase→ ParB→     | LRR-repeats+AP-GTPase+COR+TIR             | 1212 | CMK67_03795    | Gammaproteobacteria | Pseudoalteromonas sp.            | hypothetical protein CMK67_03795 [Pseudoalteromonas sp.].                                                       | GCA_002684115.1 |
| MAD04103.1 | LRR-repeats+AP-GTPase+COR*→?→  <-?<-?<-?  CNMP+CRP-HTH→                                                                                  | LRR-repeats+AP-GTPase+COR                 | 956  | CMK65_10845    | Gammaproteobacteria | Pseudoalteromonas sp.            | hypothetical protein CMK65_10845 [Pseudoalteromonas sp.].                                                       | GCA_002685175.1 |
| MAG37481.1 | AP-GTPase+COR+TIR+ACYC→ LRR-repeats+AP-GTPase+COR+DUF4404*→?→  <-?  ?→?→?→  <-DOC+CITB-HTH                                               | LRR-repeats+AP-GTPase+COR+DUF4404         | 884  | CL878_14695    | Chloroflexi         | Dehalococcoidia bacterium        | serine/threonine protein kinase [Dehalococcoidia bacterium].                                                    | GCA_002688445.1 |
| MAM30487.1 | LRR-repeats+AP-GTPase+COR*→  <-?<-tRNA<-?  Nitroreductase-like→  <-FKBP                                                                  | LRR-repeats+AP-GTPase+COR                 | 839  | CMC13_15825    | Bacteroidetes       | Flavobacteriaceae bacterium      | hypothetical protein CMC13_15825 [Flavobacteriaceae bacterium].                                                 | GCA_002693005.1 |
| MAS92856.1 | <-Cluster1364_2clades  SIG+TM+TM+TM+TM+TM→ TIR+LRR-repeats+AP-GTPase+COR*→  <-?<-?<-?<-SIG+TM+TM+TM                                      | TIR+LRR-repeats+AP-GTPase+COR             | 1140 | CMO55_06625    | Verrucomicrobia     | Verrucomicrobiales bacterium     | hypothetical protein CMO55_06625 [Verrucomicrobiales bacterium].                                                | GCA_002698785.1 |
| MAT45170.1 | LRR-repeats+AP-GTPase+COR*→                                                                                                              | LRR-repeats+AP-GTPase+COR                 | 1068 | CL609_22815    | Chloroflexi         | Anaerolineaceae bacterium        | hypothetical protein CL609_22815 [Anaerolineaceae bacterium].                                                   | GCA_002702705.1 |
| MAT70109.1 | <-Cluster1140_2clades<-?  ?→  <-?<-?  LRR-repeats+AP-GTPase+COR+TIR*→                                                                    | LRR-repeats+AP-GTPase+COR+TIR             | 1220 | CMJ58_11380    | Planctomycetes      | Planctomycetaceae bacterium      | hypothetical protein CMJ58_11380 [Planctomycetaceae bacterium].                                                 | GCA_002702655.1 |
| MAT98393.1 | LRR-repeats+AP-GTPase+COR+EAD7*→?→ SIG+PBPB→  <-?  ?→  <-SIG+TM+TM+TM+TM+TM+TM+TM+TM+TM+TM+TM<-REC                                       | LRR-repeats+AP-GTPase+COR+EAD7            | 845  | CL608_14715    | Chloroflexi         | Anaerolineaceae bacterium        | hypothetical protein CL608_14715 [Anaerolineaceae bacterium].                                                   | GCA_002699125.1 |
| MAY74446.1 | ParB→?→  <-?  ClpABN-AAA+ClpABC-AAA→ LRR-repeats+AP-GTPase+COR+TM+TM*→                                                                   | LRR-repeats+AP-GTPase+COR+TM+TM           | 1163 | CMJ31_06925    | Planctomycetes      | Phycisphaerae bacterium          | hypothetical protein CMJ31_06925 [Phycisphaerae bacterium].                                                     | GCA_002706885.1 |

| acc          | operon                                                                                                  | architecture                  | len  | gen.name     | taxend           | species                       | define                                                                                        | gca             |
|--------------|---------------------------------------------------------------------------------------------------------|-------------------------------|------|--------------|------------------|-------------------------------|-----------------------------------------------------------------------------------------------|-----------------|
| MBA2243669.1 | LRR-repeats+AP-GTPase+COR+TIR*→?→?→  <-?<-?  Cluster1476_2clades→                                       | LRR-repeats+AP-GTPase+COR+TIR | 748  | H0W11_01850  | Gemmatimonadetes | Gemmatimonadetes bacterium    | TIR domain-containing protein [Gemmatimonadetes bacterium].                                   | GCA_013694785.1 |
| MBA2243921.1 | LRR-repeats+AP-GTPase+COR+TIR*→                                                                         | LRR-repeats+AP-GTPase+COR+TIR | 693  | H0W11_03125  | Gemmatimonadetes | Gemmatimonadetes bacterium    | TIR domain-containing protein, partial [Gemmatimonadetes bacterium].                          | GCA_013694785.1 |
| MBA2678589.1 | LRR-repeats+AP-GTPase+COR*→?→  <-?<-Cluster2349_2clades                                                 | LRR-repeats+AP-GTPase+COR     | 363  | H0U76_09400  | Chloroflexi      | Ktedonobacteraceae bacterium  | leucine-rich repeat domain-containing protein [Ktedonobacteraceae bacterium].                 | GCA_013697605.1 |
| MBA2681600.1 | LRR-repeats+AP-GTPase+COR*→                                                                             | LRR-repeats+AP-GTPase+COR     | 724  | H0U76_24795  | Chloroflexi      | Ktedonobacteraceae bacterium  | leucine-rich repeat domain-containing protein, partial [Ktedonobacteraceae bacterium].        | GCA_013697605.1 |
| MBA3240620.1 | LRR-repeats+AP-GTPase+COR*→                                                                             | LRR-repeats+AP-GTPase+COR     | 321  | H0T60_05265  | Acidobacteria    | Acidobacteria bacterium       | leucine-rich repeat domain-containing protein, partial [Acidobacteria bacterium].             | GCA_013813375.1 |
| MBA3574619.1 | LRR-repeats+AP-GTPase+COR*→                                                                             | LRR-repeats+AP-GTPase+COR     | 706  | H0W37_06570  | Actinobacteria   | Pseudonocardiales bacterium   | hypothetical protein H0W37_06570, partial [Pseudonocardiales bacterium].                      | GCA_013817435.1 |
| MBA3673339.1 | Trichomonas-DAM→?→ LRR-repeats+AP-GTPase+COR+TIR*→                                                      | LRR-repeats+AP-GTPase+COR+TIR | 1186 | H0W75_00010  | Bacteroidetes    | Chitinophagaceae bacterium    | leucine-rich repeat domain-containing protein [Chitinophagaceae bacterium].                   | GCA_013816565.1 |
| MBA3805221.1 | LRR-repeats+AP-GTPase+COR+TIR*→                                                                         | LRR-repeats+AP-GTPase+COR+TIR | 805  | H0X14_05855  | Acidobacteria    | Acidobacteria bacterium       | TIR domain-containing protein [Acidobacteria bacterium].                                      | GCA_013815675.1 |
| MBA3964374.1 | LRR-repeats+AP-GTPase+COR+TIR*→                                                                         | LRR-repeats+AP-GTPase+COR+TIR | 1028 | H0X47_01080  | Nitrospirae      | Nitrospirales bacterium       | leucine-rich repeat domain-containing protein [Nitrospirales bacterium].                      | GCA_013821375.1 |
| MBA4062951.1 | <-NUDIX  ?→  <-trNA  ?→?→  <-?  LRR-repeats+AP-GTPase+COR+TIR*→                                         | LRR-repeats+AP-GTPase+COR+TIR | 867  | C0501_04445  | Planctomycetes   | Isosphaera sp.                | serine/threonine protein kinase [Isosphaera sp.].                                             | GCA_013822345.1 |
| MBB3841051.1 | TPR-repeats→?→ TPR-repeats→?→ LRR-repeats+AP-GTPase+COR+TIR*→  <-?  ?→  <-?  ?→  <-?<-?  TIR+TPR+TPR-S→ | LRR-repeats+AP-GTPase+COR+TIR | 794  | FHS57_005072 | Bacteroidetes    | Runella defluvii              | GTPase SAR1 family protein [Runella defluvii].                                                | GCA_014195535.1 |
| MBB5874185.1 | LRR-repeats+AP-GTPase+COR*→  <-?<-?<-?<-BACTERIALFRINGE+TM+TM                                           | LRR-repeats+AP-GTPase+COR     | 1250 | F4553_007619 | Actinobacteria   | Allocatelliglobospora scoriae | Leucine-rich repeat (LRR) protein/GTPase SAR1 family protein [Allocatelliglobospora scoriae]. | GCA_014204945.1 |
| MBC6434062.1 | LRR-repeats+AP-GTPase+COR*→  <-?<-?  ?→  <-?<-PSE<-N-OB                                                 | LRR-repeats+AP-GTPase+COR     | 824  | FM036_26905  | Cyanobacteria    | Nostoc sp. HG1                | hypothetical protein FM036_26905, partial [Nostoc sp. HG1].                                   | GCA_014324315.1 |
| MBC7569567.1 | LRR-repeats+AP-GTPase+COR+TIR*→                                                                         | LRR-repeats+AP-GTPase+COR+TIR | 863  | H7319_07530  | Bacteroidetes    | Spirosoma sp.                 | leucine-rich repeat domain-containing protein [Spirosoma sp.].                                | GCA_014377625.1 |
| MBC7571377.1 | Cluster1281_2clades→  <-?  LRR-repeats+AP-GTPase+COR*→  <-?<-?  ?→  <-?<-?<-?<-Cluster1413_2clades      | LRR-repeats+AP-GTPase+COR     | 1077 | H7319_16850  | Bacteroidetes    | Spirosoma sp.                 | leucine-rich repeat domain-containing protein [Spirosoma sp.].                                | GCA_014377625.1 |
| MBC7773965.1 | LRR-repeats+AP-GTPase+COR+TIR*→                                                                         | LRR-repeats+AP-GTPase+COR+TIR | 856  | H7246_00900  | Planctomycetes   | Phycisphaerae bacterium       | TIR domain-containing protein [Phycisphaerae bacterium].                                      | GCA_014379065.1 |
| MBC7775420.1 | LRR-repeats+AP-GTPase+COR*→                                                                             | LRR-repeats+AP-GTPase+COR     | 616  | H7246_08275  | Planctomycetes   | Phycisphaerae bacterium       | leucine-rich repeat domain-containing protein, partial [Phycisphaerae bacterium].             | GCA_014379065.1 |
| MBC7777197.1 | LRR-repeats+AP-GTPase+COR+TIR*→?→ HNH→                                                                  | LRR-repeats+AP-GTPase+COR+TIR | 693  | H7246_17325  | Planctomycetes   | Phycisphaerae bacterium       | GTP-binding protein, partial [Phycisphaerae bacterium].                                       | GCA_014379065.1 |
| MBC7778407.1 | LRR-repeats+AP-GTPase+COR+TIR*→                                                                         | LRR-repeats+AP-GTPase+COR+TIR | 831  | H7246_23450  | Planctomycetes   | Phycisphaerae bacterium       | TIR domain-containing protein [Phycisphaerae bacterium].                                      | GCA_014379065.1 |

| acc          | operon                                                                                                                          | architecture                    | len  | gen.name    | taxend                | species                              | define                                                                               | gca             |
|--------------|---------------------------------------------------------------------------------------------------------------------------------|---------------------------------|------|-------------|-----------------------|--------------------------------------|--------------------------------------------------------------------------------------|-----------------|
| MBC7817185.1 | LRR-repeats+AP-GTPase+COR*→                                                                                                     | LRR-repeats+AP-GTPase+COR       | 238  | IAG10_09885 | Planctomycetes        | Planctomycetaceae bacterium          | hypothetical protein IAG10_09885, partial [Planctomycetaceae bacterium].             | GCA_014379175.1 |
| MBC7817749.1 | <-RHOD-CDC25  LRR-repeats+AP-GTPase+COR+TIR*→                                                                                   | LRR-repeats+AP-GTPase+COR+TIR   | 865  | IAG10_12720 | Planctomycetes        | Planctomycetaceae bacterium          | leucine-rich repeat domain-containing protein [Planctomycetaceae bacterium].         | GCA_014379175.1 |
| MBC7826556.1 | LRR-repeats+AP-GTPase+COR+TIR*→                                                                                                 | LRR-repeats+AP-GTPase+COR+TIR   | 752  | H7122_02330 | Bacteroidetes         | Chitinophagaceae bacterium           | TIR domain-containing protein, partial [Chitinophagaceae bacterium].                 | GCA_014379345.1 |
| MBC7848891.1 | LRR-repeats+AP-GTPase+COR*→                                                                                                     | LRR-repeats+AP-GTPase+COR       | 927  | H7Y31_04105 | Bacteroidetes         | Chitinophagaceae bacterium           | leucine-rich repeat domain-containing protein, partial [Chitinophagaceae bacterium]. | GCA_014379515.1 |
| MBC7877029.1 | RADICAL-SAM→?→?→?→  <-?  ?→ LRR-repeats→ LRR-repeats+AP-GTPase+COR*→?→ ABC-ATPase→                                              | LRR-repeats+AP-GTPase+COR       | 718  | H7Y59_07640 | Chloroflexi           | Anaerolineales bacterium             | leucine-rich repeat domain-containing protein [Anaerolineales bacterium].            | GCA_014379595.1 |
| MBC7877562.1 | <-TM+RHOMBOID<-?<-?<-?  TM→ LRR-repeats+AP-GTPase+COR*→  <-?  SIGMA-HTH→                                                        | LRR-repeats+AP-GTPase+COR       | 1057 | H7Y59_10360 | Chloroflexi           | Anaerolineales bacterium             | hypothetical protein H7Y59_10360 [Anaerolineales bacterium].                         | GCA_014379595.1 |
| MBC8029843.1 | <-REC  ?→?→ Hsp10→?→ LRR-repeats+AP-GTPase+COR+TIR*→  <-?<-?<-?<-?<-ABC-ATPase                                                  | LRR-repeats+AP-GTPase+COR+TIR   | 871  | H7Z16_07010 | Acidobacteria         | Pyrinomonadaceae bacterium           | TIR domain-containing protein [Pyrinomonadaceae bacterium].                          | GCA_014380365.1 |
| MBC8182613.1 | LRR-repeats+AP-GTPase+COR*→?→?→ RelE-ParE→  <-?<-RelE-ParE<-?<-HISKIN                                                           | LRR-repeats+AP-GTPase+COR       | 687  | H8E88_16055 | Bacteria              | candidate division KSB1 bacterium    | hypothetical protein H8E88_16055, partial [candidate division KSB1 bacterium].       | GCA_014381395.1 |
| MBC8235006.1 | LRR-repeats+AP-GTPase+COR+TIR*→                                                                                                 | LRR-repeats+AP-GTPase+COR+TIR   | 1069 | H8E77_36130 | unclassified Bacteria | bacterium                            | leucine-rich repeat domain-containing protein [bacterium].                           | GCA_014381605.1 |
| MBC8264797.1 | LRR-repeats+AP-GTPase+COR*→                                                                                                     | LRR-repeats+AP-GTPase+COR       | 674  | H8E47_11810 | Chloroflexi           | Anaerolineales bacterium             | leucine-rich repeat domain-containing protein [Anaerolineales bacterium].            | GCA_014382145.1 |
| MBC8291013.1 | LRR-repeats+AP-GTPase+COR*→                                                                                                     | LRR-repeats+AP-GTPase+COR       | 692  | H8E37_11925 | Planctomycetes        | Planctomycetes bacterium             | leucine-rich repeat domain-containing protein, partial [Planctomycetes bacterium].   | GCA_014382385.1 |
| MBC8374880.1 | Cluster1757_2clades→?→ LRR-repeats+AP-GTPase+COR+DrHyd*→                                                                        | LRR-repeats+AP-GTPase+COR+DrHyd | 931  | H8E26_02475 | FCB group             | FCB group bacterium                  | 50S ribosome-binding GTPase [FCB group bacterium].                                   | GCA_014382565.1 |
| MBC8468948.1 | LRR-repeats+AP-GTPase+COR*→  <-?  ?→  <-?<-?  ?→  <-?<-SIGMA-HTH                                                                | LRR-repeats+AP-GTPase+COR       | 1003 | H8D56_05705 | Planctomycetes        | Planctomycetes bacterium             | leucine-rich repeat domain-containing protein [Planctomycetes bacterium].            | GCA_014384025.1 |
| MBC9785332.1 | Cluster1542_2clades→ LRR-repeats+AP-GTPase+COR*→                                                                                | LRR-repeats+AP-GTPase+COR       | 976  | H1S01_12510 | Firmicutes            | Heliobacterium chlorum               | leucine-rich repeat domain-containing protein [Heliobacterium chlorum].              | -               |
| MBP93715.1   | LRR-repeats+AP-GTPase+COR*→  <-?  ?→  <-?<-Cluster1995_2clades                                                                  | LRR-repeats+AP-GTPase+COR       | 894  | CMC55_06315 | Bacteroidetes         | Flavobacteriaceae bacterium          | hypothetical protein CMC55_06315 [Flavobacteriaceae bacterium].                      | GCA_002726785.1 |
| MBV11156.1   | APATPase+BetaPropeller_WD40-repeats→?→  <-?  FGS→ FGS→ FGS→ LRR-repeats+AP-GTPase+COR+TIR*→ Cluster1411_2clades→ FGS→ FGS→ FGS→ | LRR-repeats+AP-GTPase+COR+TIR   | 1075 | CMN21_18290 | Planctomycetes        | Rubinisphaera sp.                    | hypothetical protein CMN21_18290 [Rubinisphaera sp.].                                | GCA_002731545.1 |
| MQP68112.1   | LRR-repeats+AP-GTPase+COR+TIR*→  <-ParB<-ParA-Soj-PloopNTPase                                                                   | LRR-repeats+AP-GTPase+COR+TIR   | 993  | GE253_22605 | Alphaproteobacteria   | Niveispirillum sp. SYP-B3756         | TIR domain-containing protein [Niveispirillum sp. SYP-B3756].                        | GCA_009495745.1 |
| MQY15494.1   | <-Cluster2127_2clades<-?  ?→ LRR-repeats+AP-GTPase+COR*→?→ REC→ HISKIN→                                                         | LRR-repeats+AP-GTPase+COR       | 980  | SRB5_56760  | Actinobacteria        | Streptomyces sp. RB5                 | hypothetical protein SRB5_56760 [Streptomyces sp. RB5].                              | GCA_009604385.1 |
| MSP13971.1   | LRR-repeats+AP-GTPase+COR*→                                                                                                     | LRR-repeats+AP-GTPase+COR       | 792  | EXR62_13575 | Chloroflexi           | Chloroflexi bacterium                | hypothetical protein EXR62_13575, partial [Chloroflexi bacterium].                   | GCA_009692745.1 |
| MSS71311.1   | Cluster1601_2clades→ LRR-repeats+AP-GTPase+COR*→ COR+TIR→  <-Cluster1913_2clades<-?<-RPN10                                      | LRR-repeats+AP-GTPase+COR       | 556  | EXS64_07460 | FCB group             | Candidatus Latescibacteria bacterium | hypothetical protein EXS64_07460 [Candidatus Latescibacteria bacterium].             | GCA_009694805.1 |

| acc        | operon                                                                                                                                                                                            | architecture                          | len | gen.name    | taxend                | species                            | define                                                                 | gca             |
|------------|---------------------------------------------------------------------------------------------------------------------------------------------------------------------------------------------------|---------------------------------------|-----|-------------|-----------------------|------------------------------------|------------------------------------------------------------------------|-----------------|
| NAS89011.1 | POLYSACPOLYMERASE→ LRR-repeats→ LRR-repeats+AP-GTPase+COR*→  <?-?  ?→?→  <-PIN                                                                                                                    | LRR-repeats+AP-GTPase+COR             | 604 | C4E24_04665 | Euryarchaeota         | ANME-1 cluster archaeon AG-394-G21 | GTP-binding protein [ANME-1 cluster archaeon AG-394-G21].              | GCA_009903435.1 |
| NAT10404.1 | Cluster1536_2clades→  <?-?<-?  POLYSACPOLYMERASE→?→ LRR-repeats+AP-GTPase+COR→ LRR-repeats→ LRR-repeats+AP-GTPase+COR→?→  <-PIN                                                                   | LRR-repeats+AP-GTPase+COR             | 688 | C4E22_02460 | Euryarchaeota         | ANME-1 cluster archaeon AG-394-G06 | GTP-binding protein [ANME-1 cluster archaeon AG-394-G06].              | GCA_009903405.1 |
| NBC32680.1 | LRR-repeats+AP-GTPase+COR+TM+TM+TM+TM*→  <?-?  ?→?→?→  <-TM+RHOMBOID                                                                                                                              | LRR-repeats+AP-GTPase+COR+TM+TM+TM+TM | 806 | GVY13_08395 | Alphaproteobacteria   | Alphaproteobacteria bacterium      | GTP-binding protein, partial [Alphaproteobacteria bacterium].          | GCA_009909005.1 |
| NCP86657.1 | <-XIS-HTH  HTH+HTH→  <-WLM  ?→ NACHT+68TM-wHTH→ REase→?→ LRR-repeats+AP-GTPase+COR*→                                                                                                              | LRR-repeats+AP-GTPase+COR             | 960 | GW829_04700 | unclassified Bacteria | bacterium                          | hypothetical protein GW829_04700, partial [bacterium].                 | GCA_009994085.1 |
| NCP88511.1 | REase→ LRR-repeats+AP-GTPase+COR*→                                                                                                                                                                | LRR-repeats+AP-GTPase+COR             | 336 | GW829_14210 | unclassified Bacteria | bacterium                          | hypothetical protein GW829_14210, partial [bacterium].                 | GCA_009994085.1 |
| NCP88560.1 | LRR-repeats+AP-GTPase+COR*→                                                                                                                                                                       | LRR-repeats+AP-GTPase+COR             | 382 | GW829_14460 | unclassified Bacteria | bacterium                          | hypothetical protein GW829_14460, partial [bacterium].                 | GCA_009994085.1 |
| NCQ69077.1 | CHTH→ LRR-repeats+AP-GTPase+COR*→                                                                                                                                                                 | LRR-repeats+AP-GTPase+COR             | 382 | GPI97_07600 | Cyanobacteria         | Microcystis aeruginosa W13-16      | leucine-rich repeat protein, partial [Microcystis aeruginosa W13-16].  | GCA_009995625.1 |
| NCQ78095.1 | CHTH→ LRR-repeats+AP-GTPase+COR*→                                                                                                                                                                 | LRR-repeats+AP-GTPase+COR             | 359 | GPI99_08005 | Cyanobacteria         | Microcystis aeruginosa W13-15      | GTP-binding protein, partial [Microcystis aeruginosa W13-15].          | GCA_009995645.1 |
| NCQ94522.1 | Ferredoxin-betagrasp→ tRNA→ tRNA→ SAM-methylase→?→  <?-?<-SIG+TPM_phosphatase+TM+TM+TM  LRR-repeats+AP-GTPase+COR+TM+TM*→  <-?<-?<-?<-Pro_CA                                                      | LRR-repeats+AP-GTPase+COR+TM+TM       | 805 | GPJ33_04160 | Cyanobacteria         | Microcystis aeruginosa W11-03      | leucine-rich repeat protein [Microcystis aeruginosa W11-03].           | GCA_009995775.1 |
| NCR15129.1 | CHTH→ LRR-repeats+AP-GTPase+COR*→                                                                                                                                                                 | LRR-repeats+AP-GTPase+COR             | 413 | GPJ24_21065 | Cyanobacteria         | Microcystis aeruginosa SX13-11     | GTP-binding protein, partial [Microcystis aeruginosa SX13-11].         | GCA_009995725.1 |
| NCR28927.1 | CHTH→ LRR-repeats+AP-GTPase+COR*→                                                                                                                                                                 | LRR-repeats+AP-GTPase+COR             | 386 | GPJ25_22505 | Cyanobacteria         | Microcystis aeruginosa LE13-04     | leucine-rich repeat protein, partial [Microcystis aeruginosa LE13-04]. | GCA_009995995.1 |
| NCR34650.1 | LRR-repeats+AP-GTPase+COR+TM+TM*→                                                                                                                                                                 | LRR-repeats+AP-GTPase+COR+TM+TM       | 789 | GPJ31_03655 | Cyanobacteria         | Microcystis aeruginosa S11-05      | leucine-rich repeat protein [Microcystis aeruginosa S11-05].           | GCA_009995785.1 |
| NCR46978.1 | CHTH→ LRR-repeats+AP-GTPase+COR*→                                                                                                                                                                 | LRR-repeats+AP-GTPase+COR             | 514 | GPJ09_24595 | Cyanobacteria         | Microcystis aeruginosa SX13-01     | leucine-rich repeat protein, partial [Microcystis aeruginosa SX13-01]. | GCA_009995735.1 |
| NCR55589.1 | LRR-repeats+AP-GTPase+COR+TM+TM*→  <-?<-?<-?<-Pro_CA  ?→  <-?<-tRNA<-tRNA<-Ferredoxin-betagrasp                                                                                                   | LRR-repeats+AP-GTPase+COR+TM+TM       | 710 | GPJ10_20085 | Cyanobacteria         | Microcystis aeruginosa L211-07     | GTP-binding protein, partial [Microcystis aeruginosa L211-07].         | GCA_009996085.1 |
| NCR60375.1 | CHTH→ LRR-repeats+AP-GTPase+COR*→                                                                                                                                                                 | LRR-repeats+AP-GTPase+COR             | 478 | GPJ01_22875 | Cyanobacteria         | Microcystis aeruginosa LL13-06     | GTP-binding protein, partial [Microcystis aeruginosa LL13-06].         | GCA_009995895.1 |
| NCR68842.1 | CHTH→ LRR-repeats+AP-GTPase+COR*→                                                                                                                                                                 | LRR-repeats+AP-GTPase+COR             | 545 | GPJ34_21175 | Cyanobacteria         | Microcystis aeruginosa LL11-07     | GTP-binding protein, partial [Microcystis aeruginosa LL11-07].         | GCA_009995855.1 |
| NCR71934.1 | SAM-methylase→?→  <-?<-SIG+TPM_phosphatase+TM+TM+TM  LRR-repeats+AP-GTPase+COR+TM+TM*→  <-?<-?<-?<-Pro_CA                                                                                         | LRR-repeats+AP-GTPase+COR+TM+TM       | 751 | GPI93_12415 | Cyanobacteria         | Microcystis aeruginosa LG13-12     | leucine-rich repeat protein [Microcystis aeruginosa LG13-12].          | GCA_009995925.1 |
| NCR77025.1 | SIG+TM+TM+TM+TM+TM+TM+TM+TM→  <-?  Mbetalac→ SAM-methylase→?→  <-?<-SIG+TPM_phosphatase+TM+TM+TM  LRR-repeats+AP-GTPase+COR+TM+TM*→                                                               | LRR-repeats+AP-GTPase+COR+TM+TM       | 897 | GPI92_16105 | Cyanobacteria         | Microcystis aeruginosa K13-06      | GTP-binding protein [Microcystis aeruginosa K13-06].                   | GCA_009996165.1 |
| NCR80564.1 | SIG+TM+TM+TM+TM+TM+TM+TM+TM→  <-?  Mbetalac→ SAM-methylase→?→  <-?<-SIG+TPM_phosphatase+TM+TM+TM  LRR-repeats+AP-GTPase+COR+TM+TM*→                                                               | LRR-repeats+AP-GTPase+COR+TM+TM       | 805 | GPI91_11595 | Cyanobacteria         | Microcystis aeruginosa K13-10      | leucine-rich repeat protein [Microcystis aeruginosa K13-10].           | GCA_009996105.1 |
| NCR97058.1 | SIG+TM+TM+TM+TM+TM+TM+TM+TM→  <-?  Mbetalac→ SAM-methylase→?→  <-?<-SIG+TPM_phosphatase+TM+TM+TM  LRR-repeats+AP-GTPase+COR+TM+TM*→  <-?<-?<-?<-Pro_CA  ?→  <-?<-tRNA<-tRNA<-Ferredoxin-betagrasp | LRR-repeats+AP-GTPase+COR+TM+TM       | 920 | GPJ32_04180 | Cyanobacteria         | Microcystis aeruginosa L311-01     | GTP-binding protein [Microcystis aeruginosa L311-01].                  | GCA_009996025.1 |
| NCS08858.1 | CHTH→ LRR-repeats+AP-GTPase+COR*→                                                                                                                                                                 | LRR-repeats+AP-GTPase+COR             | 386 | GPJ07_21130 | Cyanobacteria         | Microcystis aeruginosa G13-07      | GTP-binding protein, partial [Microcystis aeruginosa G13-07].          | GCA_009996305.1 |
| NCS11263.1 | CHTH→ LRR-repeats+AP-GTPase+COR+TM+TM*→                                                                                                                                                           | LRR-repeats+AP-GTPase+COR+TM+TM       | 852 | GPJ08_08960 | Cyanobacteria         | Microcystis aeruginosa G13-09      | GTP-binding protein [Microcystis aeruginosa G13-09].                   | GCA_009996255.1 |
| NCS17812.1 | CHTH→ LRR-repeats+AP-GTPase+COR*→                                                                                                                                                                 | LRR-repeats+AP-GTPase+COR             | 503 | GPJ02_20805 | Cyanobacteria         | Microcystis aeruginosa G13-12      | leucine-rich repeat protein, partial [Microcystis aeruginosa G13-12].  | GCA_009996205.1 |
| NCS22942.1 | LRR-repeats+AP-GTPase+COR*→                                                                                                                                                                       | LRR-repeats+AP-GTPase+COR             | 353 | GPJ15_26105 | Cyanobacteria         | Microcystis aeruginosa G11-06      | GTP-binding protein, partial [Microcystis aeruginosa G11-06].          | GCA_009996385.1 |
| NCS24651.1 | LRR-repeats+AP-GTPase+COR+TM+TM*→  <-?<-FGS<-?<-?  ?→?→ Aminotran_1_2→                                                                                                                            | LRR-repeats+AP-GTPase+COR+TM+TM       | 732 | GPI96_09100 | Cyanobacteria         | Microcystis aeruginosa BS13-02     | GTP-binding protein, partial [Microcystis aeruginosa BS13-02].         | GCA_009996485.1 |
| NCS52102.1 | CHTH→ LRR-repeats+AP-GTPase+COR*→                                                                                                                                                                 | LRR-repeats+AP-GTPase+COR             | 397 | GPJ23_06895 | Cyanobacteria         | Microcystis aeruginosa G13-05      | leucine-rich repeat protein, partial [Microcystis aeruginosa G13-05].  | GCA_009996285.1 |

| acc        | operon                                                                                                        | architecture                      | len  | gen.name    | taxend                | species                  | define                                                                                        | gca             |
|------------|---------------------------------------------------------------------------------------------------------------|-----------------------------------|------|-------------|-----------------------|--------------------------|-----------------------------------------------------------------------------------------------|-----------------|
| NCS59859.1 | LRR-repeats+AP-GTPase+COR*→                                                                                   | LRR-repeats+AP-GTPase+COR         | 339  | GPJ16_25035 | Cyanobacteria         | Microcystis aeruginosa   | GTP-binding protein, partial                                                                  | GCA_009996445.1 |
| NCT21185.1 | <-XIS-HTH  HTH+HTH→  <-WLM  ?→ NACHT+68TM-wHTH→ REase→?→ LRR-repeats+AP-GTPase+COR*→                          | LRR-repeats+AP-GTPase+COR         | 956  | GW781_08530 | unclassified Bacteria | G11-04 bacterium         | [Microcystis aeruginosa G11-04].<br>hypothetical protein GW781_08530,<br>partial [bacterium]. | GCA_009994975.1 |
| NCT65324.1 | CHTH→ LRR-repeats+AP-GTPase+COR*→                                                                             | LRR-repeats+AP-GTPase+COR         | 434  | GPJ03_21265 | Cyanobacteria         | Microcystis aeruginosa   | leucine-rich repeat protein, partial                                                          | GCA_009996325.1 |
| NCY16589.1 | LRR-repeats+AP-GTPase+COR+TIR*→                                                                               | LRR-repeats+AP-GTPase+COR+TIR     | 1058 | EBX39_07430 | Actinobacteria        | Actinobacteria bacterium | [Microcystis aeruginosa G13-01].<br>hypothetical protein EBX39_07430                          | GCA_010021725.1 |
| NEN97779.1 | REC→  <-TPR-repeats  LRR-repeats+AP-GTPase+COR+DUF4404*→                                                      | LRR-repeats+AP-GTPase+COR+DUF4404 | 971  | F6K50_20310 | Cyanobacteria         | Moorea sp. SIO3I7        | [Actinobacteria bacterium].<br>GTPase [Moorea sp. SIO3I7].                                    | GCA_010692375.1 |
| NEO07696.1 | SIG+TM+TM+TM+TM+TM+TM+TM+TM→?→ ABC-ATPase→?→ ABC-ATPase→?→ LRR-repeats+AP-GTPase+COR*→                        | LRR-repeats+AP-GTPase+COR         | 1373 | F6K51_19885 | Cyanobacteria         | Moorea sp. SIO3I8        | leucine-rich repeat protein [Moorea sp. SIO3I8].                                              | GCA_010692325.1 |
| NEO14597.1 | REC→  <-TPR-repeats<-?  LRR-repeats+AP-GTPase+COR+DUF4404*→                                                   | LRR-repeats+AP-GTPase+COR+DUF4404 | 797  | F6K46_20370 | Cyanobacteria         | Moorea sp. SIO3E8        | GTPase [Moorea sp. SIO3E8].                                                                   | GCA_010692445.1 |
| NEO18066.1 | ABC-ATPase→  <-?  ABC-ATPase→?→?→  <-?  LRR-repeats+AP-GTPase+COR*→?→  <-?<-HNH<-PSE  ?→  <-Cluster5_5clades  | LRR-repeats+AP-GTPase+COR         | 852  | F6K57_01150 | Cyanobacteria         | Moorea sp. SIO4A5        | GTPase [Moorea sp. SIO4A5].                                                                   | GCA_010672005.1 |
| NEO21732.1 | REC→  <-?  REC→  <-TPR-repeats  LRR-repeats+AP-GTPase+COR+DUF4404*→                                           | LRR-repeats+AP-GTPase+COR+DUF4404 | 949  | F6K57_21060 | Cyanobacteria         | Moorea sp. SIO4A5        | GTPase [Moorea sp. SIO4A5].                                                                   | GCA_010672005.1 |
| NEO28667.1 | LRR-repeats+AP-GTPase+COR*→                                                                                   | LRR-repeats+AP-GTPase+COR         | 372  | F6K03_17765 | Cyanobacteria         | Kamptonema sp. SIO4C4    | GTPase, partial [Kamptonema sp. SIO4C4].                                                      | GCA_010692335.1 |
| NEO36773.1 | SIG+TM+TM+TM+TM+TM+TM+TM+TM→ ABC-ATPase→?→ ABC-ATPase→  <-?  ?→ LRR-repeats+AP-GTPase+COR*→                   | LRR-repeats+AP-GTPase+COR         | 847  | F6J90_10815 | Cyanobacteria         | Moorea sp. SIOASIH       | GTPase [Moorea sp. SIOASIH].                                                                  | GCA_010671925.1 |
| NEO37599.1 | REC→  <-?<-?  REC→  <-TPR-repeats<-?  ?→ LRR-repeats+AP-GTPase+COR+DUF4404*→ PSE→  <-?<-PSE  ?→?→?→  <-?  TM→ | LRR-repeats+AP-GTPase+COR+DUF4404 | 1099 | F6J90_15180 | Cyanobacteria         | Moorea sp. SIOASIH       | leucine-rich repeat protein [Moorea sp. SIOASIH].                                             | GCA_010671925.1 |
| NEO43843.1 | SbcC→?→ LRR-repeats+AP-GTPase+COR*→                                                                           | LRR-repeats+AP-GTPase+COR         | 1256 | F6K55_06775 | Cyanobacteria         | Moorea sp. SIO4A3        | leucine-rich repeat protein [Moorea sp. SIO4A3].                                              | GCA_010672045.1 |
| NEO48162.1 | REC→  <-TPR-repeats  LRR-repeats+AP-GTPase+COR*→                                                              | LRR-repeats+AP-GTPase+COR         | 616  | F6K55_30210 | Cyanobacteria         | Moorea sp. SIO4A3        | leucine-rich repeat protein, partial [Moorea sp. SIO4A3].                                     | GCA_010672045.1 |
| NEO55671.1 | LRR-repeats→?→ AP-GTPase*→  <-?<-SIG+Trypsin+PDZ                                                              | AP-GTPase                         | 113  | F6K54_22940 | Cyanobacteria         | Okeania sp. SIO3B5       | hypothetical protein F6K54_22940 [Okeania sp. SIO3B5].                                        | GCA_010692555.1 |
| NEO56464.1 | LRR-repeats+AP-GTPase+COR*→  <-RelE-ParE                                                                      | LRR-repeats+AP-GTPase+COR         | 856  | F6K54_27310 | Cyanobacteria         | Okeania sp. SIO3B5       | GTPase [Okeania sp. SIO3B5].                                                                  | GCA_010692555.1 |
| NEO57234.1 | <-RADICAL-SAM  PSE→ REC→?→ LRR-repeats+AP-GTPase+COR*→                                                        | LRR-repeats+AP-GTPase+COR         | 472  | F6K54_31710 | Cyanobacteria         | Okeania sp. SIO3B5       | GTPase, partial [Okeania sp. SIO3B5].                                                         | GCA_010692555.1 |
| NEO68320.1 | SIG+PBPI→?→ SIG+TM+TM+TM+TM+TM+TM+TM+TM→?→ ABC-ATPase→ ABC-ATPase→  <-?  LRR-repeats+AP-GTPase+COR*→          | LRR-repeats+AP-GTPase+COR         | 884  | F6K52_02085 | Cyanobacteria         | Moorea sp. SIO3H5        | leucine-rich repeat protein [Moorea sp. SIO3H5].                                              | GCA_010692395.1 |
| NEO73423.1 | REC→  <-TPR-repeats<-?  LRR-repeats+AP-GTPase+COR+DUF4404*→                                                   | LRR-repeats+AP-GTPase+COR+DUF4404 | 933  | F6K52_29165 | Cyanobacteria         | Moorea sp. SIO3H5        | GTPase [Moorea sp. SIO3H5].                                                                   | GCA_010692395.1 |
| NEO79069.1 | REC→  <-TPR-repeats  LRR-repeats+AP-GTPase+COR+DUF4404*→                                                      | LRR-repeats+AP-GTPase+COR+DUF4404 | 929  | F6J99_23600 | Cyanobacteria         | Moorea sp. SIO4G3        | GTPase [Moorea sp. SIO4G3].                                                                   | GCA_010692305.1 |
| NEO83336.1 | Cluster5_5clades→?→ PSE→ LRR-repeats+AP-GTPase+COR*→                                                          | LRR-repeats+AP-GTPase+COR         | 1006 | F6J87_03595 | Cyanobacteria         | Spirulina sp. SIO3F2     | leucine-rich repeat protein [Spirulina sp. SIO3F2].                                           | GCA_010672165.1 |
| NEO85545.1 | MNS-STAND+CR-REase3→  <-?<-?  ?→  <-REC<-REC  HISKIN→ LRR-repeats+AP-GTPase+COR*→  <-HISKIN                   | LRR-repeats+AP-GTPase+COR         | 1127 | F6J87_15045 | Cyanobacteria         | Spirulina sp. SIO3F2     | GTPase [Spirulina sp. SIO3F2].                                                                | GCA_010672165.1 |
| NEO86840.1 | TM+TM+TM+TM+TM+TM+TM+TM+TM→?→  <-?<-Pentapeptide-repeats  ?→ LRR-repeats+AP-GTPase+COR+DUF4404*→              | LRR-repeats+AP-GTPase+COR+DUF4404 | 1131 | F6J87_21660 | Cyanobacteria         | Spirulina sp. SIO3F2     | GTP-binding protein [Spirulina sp. SIO3F2].                                                   | GCA_010672165.1 |
| NEO88027.1 | LRR-repeats→ LRR-repeats+AP-GTPase+COR*→                                                                      | LRR-repeats+AP-GTPase+COR         | 800  | F6J87_27790 | Cyanobacteria         | Spirulina sp. SIO3F2     | hypothetical protein F6J87_27790 [Spirulina sp. SIO3F2].                                      | GCA_010672165.1 |
| NEO88064.1 | Cluster1048_2clades→ LRR-repeats+AP-GTPase+COR*→                                                              | LRR-repeats+AP-GTPase+COR         | 1166 | F6J87_27980 | Cyanobacteria         | Spirulina sp. SIO3F2     | GTPase [Spirulina sp. SIO3F2].                                                                | GCA_010672165.1 |
| NEO88189.1 | LRR-repeats+AP-GTPase+COR*→                                                                                   | LRR-repeats+AP-GTPase+COR         | 1134 | F6J87_28620 | Cyanobacteria         | Spirulina sp. SIO3F2     | hypothetical protein F6J87_28620 [Spirulina sp. SIO3F2].                                      | GCA_010672165.1 |
| NEP02262.1 | LRR-repeats+AP-GTPase+COR*→ ParA-Soj-PloopNTPase→                                                             | LRR-repeats+AP-GTPase+COR         | 814  | F6K58_27120 | Cyanobacteria         | Symploca sp. SIO2E9      | leucine-rich repeat protein [Symploca sp. SIO2E9].                                            | GCA_010692645.1 |
| NEP15532.1 | LRR-repeats+AP-GTPase+COR+TIR*→?→  <-?  ?→  <-?<-?<-?  ABhydrolase→                                           | LRR-repeats+AP-GTPase+COR+TIR     | 1041 | F6J97_01370 | Cyanobacteria         | Leptolyngbya sp. SIO4C1  | TIR domain-containing protein [Leptolyngbya sp. SIO4C1].                                      | GCA_010671975.1 |

| acc        | operon                                                                                                                                     | architecture                      | len  | gen.name    | taxend        | species                 | define                                                               | gca             |
|------------|--------------------------------------------------------------------------------------------------------------------------------------------|-----------------------------------|------|-------------|---------------|-------------------------|----------------------------------------------------------------------|-----------------|
| NEP17061.1 | TM+TM+TM+TM+TM→ LRR-repeats+AP-GTPase+COR+DUF4404*→  <-SIG+TM+TM                                                                           | LRR-repeats+AP-GTPase+COR+DUF4404 | 1026 | F6J97_09150 | Cyanobacteria | Leptolyngbya sp. SIO4C1 | GTP-binding protein [Leptolyngbya sp. SIO4C1].                       | GCA_010671975.1 |
| NEP23180.1 | SIG+TM+TM+TM+TM+TM+TM+TM→?→ ABC-ATPase→<br>ABC-ATPase→  <-?  ?→  <-?  LRR-repeats+AP-GTPase+COR*→?→  <-?<-HNH<-PSE  ?→  <-Cluster5_5clades | LRR-repeats+AP-GTPase+COR         | 892  | F6K49_14560 | Cyanobacteria | Moorea sp. SIO3I6       | GTPase [Moorea sp. SIO3I6].                                          | GCA_010672095.1 |
| NEP27050.1 | LRR-repeats+AP-GTPase+COR+DUF4404*→                                                                                                        | LRR-repeats+AP-GTPase+COR+DUF4404 | 909  | F6K49_35465 | Cyanobacteria | Moorea sp. SIO3I6       | GTPase [Moorea sp. SIO3I6].                                          | GCA_010672095.1 |
| NEP34707.1 | LRR-repeats+AP-GTPase+COR+DUF4404*→                                                                                                        | LRR-repeats+AP-GTPase+COR+DUF4404 | 924  | F6K38_25730 | Cyanobacteria | Moorea sp. SIO3B2       | GTPase, partial [Moorea sp. SIO3B2].                                 | GCA_010692525.1 |
| NEP80618.1 | LRR-repeats+AP-GTPase+COR*→                                                                                                                | LRR-repeats+AP-GTPase+COR         | 891  | F6K39_22060 | Cyanobacteria | Okeania sp. SIO3B3      | GTPase [Okeania sp. SIO3B3].                                         | GCA_010692535.1 |
| NEP81305.1 | LRR-repeats+AP-GTPase+COR*→                                                                                                                | LRR-repeats+AP-GTPase+COR         | 790  | F6K39_25960 | Cyanobacteria | Okeania sp. SIO3B3      | GTPase [Okeania sp. SIO3B3].                                         | GCA_010692535.1 |
| NEP82037.1 | LRR-repeats+AP-GTPase+COR*→                                                                                                                | LRR-repeats+AP-GTPase+COR         | 664  | F6K39_30180 | Cyanobacteria | Okeania sp. SIO3B3      | hypothetical protein F6K39_30180 [Okeania sp. SIO3B3].               | GCA_010692535.1 |
| NEP82994.1 | LRR-repeats+AP-GTPase*→                                                                                                                    | LRR-repeats+AP-GTPase             | 713  | F6K39_35565 | Cyanobacteria | Okeania sp. SIO3B3      | leucine-rich repeat protein [Okeania sp. SIO3B3].                    | GCA_010692535.1 |
| NEP88726.1 | <-HhH-RADC+JAB<-?  LRR-repeats+AP-GTPase+COR*→                                                                                             | LRR-repeats+AP-GTPase+COR         | 800  | F6K18_18835 | Cyanobacteria | Okeania sp. SIO2C2      | GTPase [Okeania sp. SIO2C2].                                         | GCA_010692625.1 |
| NEQ25590.1 | LRR-repeats+AP-GTPase+COR*→                                                                                                                | LRR-repeats+AP-GTPase+COR         | 329  | F6K28_42320 | Cyanobacteria | Microcoleus sp. SIO2G3  | hypothetical protein F6K28_42320, partial [Microcoleus sp. SIO2G3].  | GCA_010672365.1 |
| NEQ30222.1 | SF2-DUF3427A→  <-PSE  ?→ LRR-repeats+AP-GTPase+COR*→                                                                                       | LRR-repeats+AP-GTPase+COR         | 425  | F6K04_04355 | Cyanobacteria | Leptolyngbya sp. SIO4C5 | GTP-binding protein, partial [Leptolyngbya sp. SIO4C5].              | GCA_010671965.1 |
| NEQ30763.1 | LRR-repeats+AP-GTPase+COR+DrHyd*→  <-SAM-methylase                                                                                         | LRR-repeats+AP-GTPase+COR+DrHyd   | 1168 | F6K04_07140 | Cyanobacteria | Leptolyngbya sp. SIO4C5 | hypothetical protein F6K04_07140 [Leptolyngbya sp. SIO4C5].          | GCA_010671965.1 |
| NEQ30823.1 | LRR-repeats+AP-GTPase+COR*→                                                                                                                | LRR-repeats+AP-GTPase+COR         | 1087 | F6K04_07455 | Cyanobacteria | Leptolyngbya sp. SIO4C5 | hypothetical protein F6K04_07455 [Leptolyngbya sp. SIO4C5].          | GCA_010671965.1 |
| NEQ33180.1 | LRR-repeats+AP-GTPase+COR+TIR*→  <-Cluster2398_2clades                                                                                     | LRR-repeats+AP-GTPase+COR+TIR     | 974  | F6K04_19645 | Cyanobacteria | Leptolyngbya sp. SIO4C5 | TIR domain-containing protein [Leptolyngbya sp. SIO4C5].             | GCA_010671965.1 |
| NEQ38623.1 | LRR-repeats→  <-?  ?→ LRR-repeats+AP-GTPase+COR*→                                                                                          | LRR-repeats+AP-GTPase+COR         | 778  | F6K40_21075 | Cyanobacteria | Okeania sp. SIO3I5      | GTPase [Okeania sp. SIO3I5].                                         | GCA_010672085.1 |
| NEQ39708.1 | LRR-repeats+AP-GTPase+COR*→                                                                                                                | LRR-repeats+AP-GTPase+COR         | 641  | F6K40_27040 | Cyanobacteria | Okeania sp. SIO3I5      | hypothetical protein F6K40_27040 [Okeania sp. SIO3I5].               | GCA_010672085.1 |
| NEQ41322.1 | LRR-repeats+AP-GTPase+COR*→                                                                                                                | LRR-repeats+AP-GTPase+COR         | 923  | F6K40_36055 | Cyanobacteria | Okeania sp. SIO3I5      | GTPase [Okeania sp. SIO3I5].                                         | GCA_010672085.1 |
| NEQ51480.1 | LRR-repeats+AP-GTPase+COR+DrHyd*→  <-?  ?→  <-SF2-DUF3427A                                                                                 | LRR-repeats+AP-GTPase+COR+DrHyd   | 841  | F6K11_15280 | Cyanobacteria | Leptolyngbya sp. SIO3F4 | hypothetical protein F6K11_15280, partial [Leptolyngbya sp. SIO3F4]. | GCA_010672145.1 |
| NEQ51880.1 | LRR-repeats+AP-GTPase+COR+TM+TM*→                                                                                                          | LRR-repeats+AP-GTPase+COR+TM+TM   | 1022 | F6K11_17360 | Cyanobacteria | Leptolyngbya sp. SIO3F4 | GTP-binding protein [Leptolyngbya sp. SIO3F4].                       | GCA_010672145.1 |
| NEQ52141.1 | LRR-repeats+AP-GTPase+COR+TIR*→                                                                                                            | LRR-repeats+AP-GTPase+COR+TIR     | 825  | F6K11_18705 | Cyanobacteria | Leptolyngbya sp. SIO3F4 | GTP-binding protein, partial [Leptolyngbya sp. SIO3F4].              | GCA_010672145.1 |
| NEQ52634.1 | LRR-repeats+AP-GTPase+COR+TIR*→ LRR-repeats→                                                                                               | LRR-repeats+AP-GTPase+COR+TIR     | 827  | F6K11_21260 | Cyanobacteria | Leptolyngbya sp. SIO3F4 | TIR domain-containing protein, partial [Leptolyngbya sp. SIO3F4].    | GCA_010672145.1 |
| NEQ54121.1 | LRR-repeats+AP-GTPase+COR+TIR*→                                                                                                            | LRR-repeats+AP-GTPase+COR+TIR     | 826  | F6K11_28985 | Cyanobacteria | Leptolyngbya sp. SIO3F4 | TIR domain-containing protein, partial [Leptolyngbya sp. SIO3F4].    | GCA_010672145.1 |
| NEQ54707.1 | LRR-repeats+AP-GTPase+COR*→                                                                                                                | LRR-repeats+AP-GTPase+COR         | 547  | F6K11_32030 | Cyanobacteria | Leptolyngbya sp. SIO3F4 | GTP-binding protein, partial [Leptolyngbya sp. SIO3F4].              | GCA_010672145.1 |
| NEQ55863.1 | LRR-repeats+AP-GTPase+COR*→                                                                                                                | LRR-repeats+AP-GTPase+COR         | 335  | F6K11_38165 | Cyanobacteria | Leptolyngbya sp. SIO3F4 | serine/threonine protein kinase, partial [Leptolyngbya sp. SIO3F4].  | GCA_010672145.1 |
| NEQ58292.1 | SIG+TM+TM+TM+TM+TM+TM+TM→?→ ABC-ATPase→<br>ABC-ATPase→?→  <-?  LRR-repeats+AP-GTPase+COR*→?→  <-?<-HNH<-PSE  ?→  <-Cluster5_5clades        | LRR-repeats+AP-GTPase+COR         | 849  | F6K53_13090 | Cyanobacteria | Moorea sp. SIO4A1       | GTPase [Moorea sp. SIO4A1].                                          | GCA_010672065.1 |
| NEQ85055.1 | LRR-repeats+AP-GTPase+COR*→                                                                                                                | LRR-repeats+AP-GTPase+COR         | 554  | F6K26_34455 | Cyanobacteria | Moorea sp. SIO2I5       | GTPase, partial [Moorea sp. SIO2I5].                                 | GCA_010672285.1 |
| NER03418.1 | LRR-repeats+AP-GTPase+COR*→                                                                                                                | LRR-repeats+AP-GTPase+COR         | 738  | F6K17_12770 | Cyanobacteria | Okeania sp. SIO3C4      | GTPase, partial [Okeania sp. SIO3C4].                                | GCA_010672215.1 |
| NER25299.1 | TM+TM+TM+TM+TM+TM→  <-?  ?→ Pkinase→?→ LRR-repeats+AP-GTPase+COR*→ Cluster5_5clades→                                                       | LRR-repeats+AP-GTPase+COR         | 1031 | F6J96_32295 | Cyanobacteria | Symploca sp. SIO1C2     | hypothetical protein F6J96_32295 [Symploca sp. SIO1C2].              | GCA_010672925.1 |





| acc        | operon                                                                                                               | architecture                      | len | gen.name    | taxend                | species                                   | define                                                                       | gca             |
|------------|----------------------------------------------------------------------------------------------------------------------|-----------------------------------|-----|-------------|-----------------------|-------------------------------------------|------------------------------------------------------------------------------|-----------------|
| NET68629.1 | REC→  <-TPR-repeats<-?  LRR-repeats+AP-GTPase+COR+DUF4404*→                                                          | LRR-repeats+AP-GTPase+COR+DUF4404 | 938 | F6K63_31235 | Cyanobacteria         | Moorea sp. SIO1G6                         | GTPase [Moorea sp. SIO1G6].                                                  | GCA_010672795.1 |
| NET73474.1 | LRR-repeats+AP-GTPase+COR+DUF4404*→                                                                                  | LRR-repeats+AP-GTPase+COR+DUF4404 | 821 | F6K62_21805 | Cyanobacteria         | Sphaerospermopsis sp. SIO1G2              | GTP-binding protein, partial [Sphaerospermopsis sp. SIO1G2].                 | GCA_010672725.1 |
| NET83099.1 | REC→  <-?  REC→  <-TPR-repeats  LRR-repeats+AP-GTPase+COR+DUF4404*→                                                  | LRR-repeats+AP-GTPase+COR+DUF4404 | 946 | F6J94_14560 | Cyanobacteria         | Moorea sp. SIO1F2                         | GTPase [Moorea sp. SIO1F2].                                                  | GCA_010672755.1 |
| NEZ62303.1 | PIN→ LRR-repeats→ LRR-repeats+AP-GTPase+COR*→?→ COR+TIR→ SIG+Trypsin+PDZ→                                            | LRR-repeats+AP-GTPase+COR         | 318 | D0962_05850 | Cyanobacteria         | Leptolyngbyaceae cyanobacterium CCMR0082  | hypothetical protein D0962_05850 [Leptolyngbyaceae cyanobacterium CCMR0082]. | GCA_011009535.1 |
| NIM11849.1 | SICOLD→  <-?<-?<-?  ?→ Cluster54_3clades→ Cluster1093_2clades→ LRR-repeats+AP-GTPase+COR*→  <-?<-Cluster2413_2clades | LRR-repeats+AP-GTPase+COR         | 882 | GTO81_07705 | Bacteria              | Candidatus Aminicenantes bacterium        | GTP-binding protein [Candidatus Aminicenantes bacterium].                    | GCA_011771225.1 |
| NIM14508.1 | Aminotran_1_2→  <-?<-Cluster1540_2clades<-?  ?→?→ LRR-repeats+AP-GTPase+COR+TIR*→                                    | LRR-repeats+AP-GTPase+COR+TIR     | 784 | GTO81_21225 | Bacteria              | Candidatus Aminicenantes bacterium        | TIR domain-containing protein [Candidatus Aminicenantes bacterium].          | GCA_011771225.1 |
| NIM17826.1 | LRR-repeats+AP-GTPase+COR*→                                                                                          | LRR-repeats+AP-GTPase+COR         | 952 | GTO81_38090 | Bacteria              | Candidatus Aminicenantes bacterium        | hypothetical protein GTO81_38090 [Candidatus Aminicenantes bacterium].       | GCA_011771225.1 |
| NIN06216.1 | LRR-repeats+AP-GTPase+COR*→                                                                                          | LRR-repeats+AP-GTPase+COR         | 781 | GTO43_07600 | Armatimonadetes       | Armatimonadetes bacterium                 | GTPase, partial [Armatimonadetes bacterium].                                 | GCA_011771945.1 |
| NIP25303.1 | <-SIG+TIMbarrel  LRR-repeats+AP-GTPase+COR+TIR*→                                                                     | LRR-repeats+AP-GTPase+COR+TIR     | 868 | GWO38_16175 | Planctomycetes        | Phycisphaerae bacterium                   | TIR domain-containing protein [Phycisphaerae bacterium].                     | GCA_011774285.1 |
| NIP41904.1 | LRR-repeats+AP-GTPase+COR*→                                                                                          | LRR-repeats+AP-GTPase+COR         | 457 | GWO28_04170 | FCB group             | candidate division Zixibacteria bacterium | GTPase, partial [candidate division Zixibacteria bacterium].                 | GCA_011774485.1 |
| NIR09229.1 | LRR-repeats+AP-GTPase*→ COR→                                                                                         | LRR-repeats+AP-GTPase             | 251 | GTN82_27750 | Bacteria              | Candidatus Aminicenantes bacterium        | GTP-binding protein, partial [Candidatus Aminicenantes bacterium].           | GCA_011773265.1 |
| NIU83786.1 | LRR-repeats+AP-GTPase+COR*→                                                                                          | LRR-repeats+AP-GTPase+COR         | 888 | GWN64_10000 | Asgard group          | Candidatus Thorarchaeota archaeon         | GTPase [Candidatus Thorarchaeota archaeon].                                  | GCA_011775775.1 |
| NJD78109.1 | SAM-methylase→  <-?  ?→?→  <-?  ?→?→ LRR-repeats+AP-GTPase+COR*→                                                     | LRR-repeats+AP-GTPase+COR         | 844 | FIB08_13625 | Euryarchaeota         | Candidatus Methanoperedens sp.            | GTP-binding protein [Candidatus Methanoperedens sp.].                        | GCA_012026835.1 |
| NJK31611.1 | LRR-repeats+AP-GTPase+COR*→                                                                                          | LRR-repeats+AP-GTPase+COR         | 784 | HC927_03900 | Deltaproteobacteria   | Deltaproteobacteria bacterium             | hypothetical protein HC927_03900 [Deltaproteobacteria bacterium].            | GCA_012031025.1 |
| NJK68783.1 | LRR-repeats+AP-GTPase+COR*→?→?→?→?→  <-Pentapeptide-repeats                                                          | LRR-repeats+AP-GTPase+COR         | 637 | HC941_21705 | Cyanobacteria         | Microcoleus sp. SU_5_3                    | GTP-binding protein, partial [Microcoleus sp. SU_5_3].                       | GCA_012030835.1 |
| NJK99654.1 | LRR-repeats+AP-GTPase+COR*→                                                                                          | LRR-repeats+AP-GTPase+COR         | 665 | HC910_03475 | Cyanobacteria         | Spirulinaceae cyanobacterium SM2_1_0      | GTP-binding protein [Spirulinaceae cyanobacterium SM2_1_0].                  | GCA_012031265.1 |
| NJL39962.1 | LRR-repeats+AP-GTPase+COR*→                                                                                          | LRR-repeats+AP-GTPase+COR         | 814 | HC899_26815 | Cyanobacteria         | Leptolyngbyaceae cyanobacterium SM1_4_3   | GTP-binding protein [Leptolyngbyaceae cyanobacterium SM1_4_3].               | GCA_012031415.1 |
| NJL55090.1 | LRR-repeats+AP-GTPase+COR+TIR*→  <-REase-4  ?→ Cluster5_5clades→?→  <-Cluster2398_2clades                            | LRR-repeats+AP-GTPase+COR+TIR     | 879 | HC928_07795 | unclassified Bacteria | bacterium                                 | TIR domain-containing protein [bacterium].                                   | GCA_012031555.1 |
| NJL55819.1 | Cluster1137_2clades→?→ LRR-repeats+AP-GTPase+COR*→ PSE→?→  <-Cluster1102_3clades                                     | LRR-repeats+AP-GTPase+COR         | 671 | HC928_11965 | unclassified Bacteria | bacterium                                 | GTP-binding protein [bacterium].                                             | GCA_012031555.1 |
| NJL58018.1 | LRR-repeats+AP-GTPase+COR*→ COR→                                                                                     | LRR-repeats+AP-GTPase+COR         | 365 | HC928_25050 | unclassified Bacteria | bacterium                                 | hypothetical protein HC928_25050, partial [bacterium].                       | GCA_012031555.1 |
| NJL60049.1 | LRR-repeats+AP-GTPase+COR*→ COR+TIR→                                                                                 | LRR-repeats+AP-GTPase+COR         | 389 | HC887_10835 | Deltaproteobacteria   | Desulfobacteraceae bacterium              | hypothetical protein HC887_10835 [Desulfobacteraceae bacterium].             | GCA_012031825.1 |
| NJL77569.1 | LRR-repeats+AP-GTPase+COR*→                                                                                          | LRR-repeats+AP-GTPase+COR         | 408 | HC892_23555 | Bacteroidetes         | Saprospiraceae bacterium                  | hypothetical protein HC892_23555, partial [Saprospiraceae bacterium].        | GCA_012031785.1 |
| NJL83760.1 | LRR-repeats+AP-GTPase+COR*→                                                                                          | LRR-repeats+AP-GTPase+COR         | 688 | HC890_14000 | Chloroflexi           | Chloroflexaceae bacterium                 | GTP-binding protein [Chloroflexaceae bacterium].                             | GCA_012031815.1 |

| acc        | operon                                                                                                      | architecture                          | len  | gen.name    | taxend        | species                                      | define                                                                                      | gca             |
|------------|-------------------------------------------------------------------------------------------------------------|---------------------------------------|------|-------------|---------------|----------------------------------------------|---------------------------------------------------------------------------------------------|-----------------|
| NJL90622.1 | <-RelE-ParE<-?  LRR-repeats+AP-GTPase+COR*→?→ PSE→?→ PSE→ RNA-Helicase→                                     | LRR-repeats+AP-GTPase+COR             | 1140 | HC916_13170 | Cyanobacteria | Coleofasciculaceae<br>cyanobacterium SM2_1_6 | GTP-binding protein<br>[Coleofasciculaceae cyanobacterium<br>SM2_1_6].                      | GCA_012031635.1 |
| NJL91916.1 | LRR-repeats+AP-GTPase+COR*→?→ HNH→                                                                          | LRR-repeats+AP-GTPase+COR             | 640  | HC916_20640 | Cyanobacteria | Coleofasciculaceae<br>cyanobacterium SM2_1_6 | GTPase, partial [Coleofasciculaceae<br>cyanobacterium SM2_1_6].                             | GCA_012031635.1 |
| NJM60379.1 | <-SIG+TM+TM+TM<-?  TPR-repeats→  <-?<-Cluster5_5clades  ?→?→ LRR-repeats+AP-GTPase+COR*→                    | LRR-repeats+AP-GTPase+COR             | 729  | HC849_09565 | Cyanobacteria | Oscillatoriales<br>cyanobacterium RU_3_3     | hypothetical protein HC849_09565,<br>partial [Oscillatoriales<br>cyanobacterium RU_3_3].    | GCA_012032195.1 |
| NJM78344.1 | LRR-repeats+AP-GTPase+COR*→                                                                                 | LRR-repeats+AP-GTPase+COR             | 500  | HC852_24405 | Cyanobacteria | Acaryochloridaceae<br>cyanobacterium RU_4_10 | hypothetical protein HC852_24405<br>[Acaryochloridaceae cyanobacterium<br>RU_4_10].         | GCA_012032135.1 |
| NJM97967.1 | LRR-repeats→ LRR-repeats+AP-GTPase+COR*→ AP-GTPase+COR+TM+TM→                                               | LRR-repeats+AP-GTPase+COR             | 278  | HC800_13155 | Cyanobacteria | Phormidesmis sp. RL_2_1                      | hypothetical protein HC800_13155<br>[Phormidesmis sp. RL_2_1].                              | GCA_012033015.1 |
| NJN20692.1 | LRR-repeats+AP-GTPase+COR*→ TIR→  <-Cluster5_5clades<-Pentapeptide  REC→                                    | LRR-repeats+AP-GTPase+COR             | 276  | HC812_05240 | Cyanobacteria | Leptolyngbya sp. RL_3_1                      | hypothetical protein HC812_05240,<br>partial [Leptolyngbya sp. RL_3_1].                     | GCA_012032425.1 |
| NJN57594.1 | LRR-repeats+AP-GTPase+COR+TIR*→                                                                             | LRR-repeats+AP-<br>GTPase+COR+TIR     | 1087 | HC879_08885 | Cyanobacteria | Leptolyngbyaceae<br>cyanobacterium SL_5_9    | TIR domain-containing protein<br>[Leptolyngbyaceae cyanobacterium<br>SL_5_9].               | GCA_012032565.1 |
| NJN63246.1 | LRR-repeats+AP-GTPase+COR*→                                                                                 | LRR-repeats+AP-GTPase+COR             | 747  | HC795_18555 | Cyanobacteria | Coleofasciculaceae<br>cyanobacterium RL_1_1  | hypothetical protein HC795_18555,<br>partial [Coleofasciculaceae<br>cyanobacterium RL_1_1]. | GCA_012033105.1 |
| NJN72933.1 | LRR-repeats+AP-GTPase+COR+DUF4404*→  <-?  ?→ SIG+Classical-AAA→                                             | LRR-repeats+AP-<br>GTPase+COR+DUF4404 | 832  | HC799_09060 | Cyanobacteria | Limnothrix sp. RL_2_0                        | GTP-binding protein [Limnothrix<br>sp. RL_2_0].                                             | GCA_012033055.1 |
| NJN75229.1 | LRR-repeats+AP-GTPase→ AP-GTPase*→?→ COR+TM+TM+TM→                                                          | AP-GTPase                             | 180  | HC796_01955 | Cyanobacteria | Synechococcaceae<br>cyanobacterium RL_1_2    | hypothetical protein HC796_01955<br>[Synechococcaceae cyanobacterium<br>RL_1_2].            | GCA_012033095.1 |
| NJN88810.1 | LRR-repeats+AP-GTPase+COR*→                                                                                 | LRR-repeats+AP-GTPase+COR             | 1016 | HC881_24165 | Cyanobacteria | Leptolyngbyaceae<br>cyanobacterium SL_7_1    | GTP-binding protein<br>[Leptolyngbyaceae cyanobacterium<br>SL_7_1].                         | GCA_012032525.1 |
| NJN89941.1 | LRR-repeats+AP-GTPase+COR*→                                                                                 | LRR-repeats+AP-GTPase+COR             | 814  | HC878_05910 | Cyanobacteria | Leptolyngbyaceae<br>cyanobacterium SL_5_14   | GTP-binding protein<br>[Leptolyngbyaceae cyanobacterium<br>SL_5_14].                        | GCA_012032515.1 |
| NJN96139.1 | Cluster1841_2clades→?→ LRR-repeats→ LRR-repeats+AP-GTPase+COR*→ Cluster2316_2clades→ Cluster2224_2clades→?→ | LRR-repeats+AP-GTPase+COR             | 573  | HC875_19545 | Chloroflexi   | Anaerolineales bacterium                     | GTP-binding protein [Anaerolineales<br>bacterium].                                          | GCA_012032575.1 |
| NJO03971.1 | Cluster1087_2clades→  <-?<-?<-ABC-ATPase<br>LRR-repeats+AP-GTPase+COR+EAD7*→                                | LRR-repeats+AP-<br>GTPase+COR+EAD7    | 814  | HC880_21890 | Bacteroidetes | Bacteroidia bacterium                        | hypothetical protein HC880_21890<br>[Bacteroidia bacterium].                                | GCA_012033155.1 |
| NJO04035.1 | LRR-repeats+AP-GTPase+COR+EAD7*→                                                                            | LRR-repeats+AP-<br>GTPase+COR+EAD7    | 843  | HC880_22270 | Bacteroidetes | Bacteroidia bacterium                        | hypothetical protein HC880_22270<br>[Bacteroidia bacterium].                                | GCA_012033155.1 |
| NJO50334.1 | LRR-repeats+AP-GTPase+COR*→                                                                                 | LRR-repeats+AP-GTPase+COR             | 510  | HC840_13875 | Cyanobacteria | Leptolyngbyaceae<br>cyanobacterium RM2_2_4   | GTP-binding protein, partial<br>[Leptolyngbyaceae cyanobacterium<br>RM2_2_4].               | GCA_012033305.1 |
| NJP08786.1 | <-Cluster5_5clades  ?→?→?→?→ LRR-repeats+AP-GTPase+COR*→                                                    | LRR-repeats+AP-GTPase+COR             | 841  | HC866_04300 | Cyanobacteria | Leptolyngbyaceae<br>cyanobacterium RU_5_1    | GTPase [Leptolyngbyaceae<br>cyanobacterium RU_5_1].                                         | GCA_012034055.1 |
| NJR23767.1 | GTPase-AIG→?→?→ LRR-repeats+AP-GTPase+COR+DUF4404*→                                                         | LRR-repeats+AP-<br>GTPase+COR+DUF4404 | 1061 | HC786_17240 | Cyanobacteria | Richelia sp. CSU_2_1                         | GTP-binding protein [Richelia sp.<br>CSU_2_1].                                              | GCA_012034575.1 |
| NJR25667.1 | LRR-repeats+AP-GTPase+COR*→                                                                                 | LRR-repeats+AP-GTPase+COR             | 856  | HC786_27780 | Cyanobacteria | Richelia sp. CSU_2_1                         | hypothetical protein HC786_27780,<br>partial [Richelia sp. CSU_2_1].                        | GCA_012034575.1 |
| NJR41095.1 | LRR-repeats+AP-GTPase+COR+TIR*→                                                                             | LRR-repeats+AP-<br>GTPase+COR+TIR     | 677  | HC781_22475 | Cyanobacteria | Leptolyngbyaceae<br>cyanobacterium CSU_1_4   | GTP-binding protein<br>[Leptolyngbyaceae cyanobacterium<br>CSU_1_4].                        | GCA_012034615.1 |
| NJR68835.1 | <-SIGMA-HTH<-?<-?<-?  ?→ LRR-repeats+AP-GTPase+COR+TCAD1*→?→  <-?<-?<-?  ?→  <-TPR-repeats                  | LRR-repeats+AP-<br>GTPase+COR+TCAD1   | 892  | HC771_09325 | Cyanobacteria | Synechococcales<br>cyanobacterium CRU_2_2    | GTPase [Synechococcales<br>cyanobacterium CRU_2_2].                                         | GCA_012034805.1 |

| acc        | operon                                                                                                                             | architecture                      | len  | gen.name    | taxend              | species                       | define                                                                             | gca             |
|------------|------------------------------------------------------------------------------------------------------------------------------------|-----------------------------------|------|-------------|---------------------|-------------------------------|------------------------------------------------------------------------------------|-----------------|
| NJS09810.1 | GTPase-AIG→?→?→  <?<?  LRR-repeats+AP-GTPase+COR*→?→?→?→?→  <-Pentapeptide-repeats                                                 | LRR-repeats+AP-GTPase+COR         | 761  | HC789_05185 | Cyanobacteria       | Microcoleus sp. CSU_2_2       | GTP-binding protein [Microcoleus sp. CSU_2_2].                                     | GCA_012035135.1 |
| NKC15125.1 | LRR-repeats+AP-GTPase+COR+DrHyd*→                                                                                                  | LRR-repeats+AP-GTPase+COR+DrHyd   | 1164 | GKR94_23910 | Gammaproteobacteria | Gammaproteobacteria bacterium | hypothetical protein GKR94_23910 [Gammaproteobacteria bacterium].                  | GCA_012103455.1 |
| NKQ34928.1 | RelE-ParE→?→?→ PSE→ LRR-repeats+AP-GTPase+COR+EAD7*→                                                                               | LRR-repeats+AP-GTPase+COR+EAD7    | 553  | HF973_04850 | Chloroflexi         | Chloroflexi bacterium         | hypothetical protein HF973_04850 [Chloroflexi bacterium].                          | GCA_012329075.1 |
| NLT19133.1 | LRR-repeats+AP-GTPase+COR*→                                                                                                        | LRR-repeats+AP-GTPase+COR         | 709  | GXY10_07015 | Firmicutes          | Clostridiales bacterium       | GTP-binding protein, partial [Clostridiales bacterium].                            | GCA_012718845.1 |
| NMF86259.1 | RelE→ CHTH→?→?→  <?<?<?<?  LRR-repeats+AP-GTPase+COR+TIR*→?→?→  <?<?  ?→?→  <?<-RelE-ParE                                          | LRR-repeats+AP-GTPase+COR+TIR     | 1176 | E1H13_23515 | Cyanobacteria       | Nodosilinea sp. P-1105        | TIR domain-containing protein [Nodosilinea sp. P-1105].                            | GCA_012911975.1 |
| NND77029.1 | LRR-repeats+AP-GTPase+COR*→  <?<?<?<?<-SIG+TM+TM+TM+TM                                                                             | LRR-repeats+AP-GTPase+COR         | 842  | HKN39_02455 | Bacteroidetes       | Flavobacteriales bacterium    | hypothetical protein HKN39_02455 [Flavobacteriales bacterium].                     | GCA_013002285.1 |
| NOG45111.1 | MORC→?→ LRR-repeats→ LRR-repeats+AP-GTPase+COR*→?→?→  <?<?<-BetaPropeller+BetaPropeller                                            | LRR-repeats+AP-GTPase+COR         | 652  | HND50_07765 | Calditrichaeota     | Calditrichaeota bacterium     | hypothetical protein HND50_07765 [Calditrichaeota bacterium].                      | GCA_013112635.1 |
| NOH03519.1 | DAGKIN→ Cluster1917_2clades→?→?→  <?<?  LRR-repeats→ PSE→ LRR-repeats+AP-GTPase+COR*→?→?→  <-PSE  ?→  <?<-GTPase-AIG  Thioredoxin→ | LRR-repeats+AP-GTPase+COR         | 345  | HND47_16930 | Chloroflexi         | Chloroflexi bacterium         | hypothetical protein HND47_16930 [Chloroflexi bacterium].                          | GCA_013112685.1 |
| NOH03560.1 | REase→ LRR-repeats+AP-GTPase+COR→ LRR-repeats+AP-GTPase+COR→                                                                       | LRR-repeats+AP-GTPase+COR         | 878  | HND47_17170 | Chloroflexi         | Chloroflexi bacterium         | hypothetical protein HND47_17170 [Chloroflexi bacterium].                          | GCA_013112685.1 |
| NOH03561.1 | LRR-repeats+AP-GTPase+COR*→                                                                                                        | LRR-repeats+AP-GTPase+COR         | 852  | HND47_17175 | Chloroflexi         | Chloroflexi bacterium         | GTP-binding protein [Chloroflexi bacterium].                                       | GCA_013112685.1 |
| NOH03734.1 | PIN→ PSE→?→?→ LRR-repeats+AP-GTPase+COR*→?→?→?→ PSE→  <?<-PSE  ?→ Cluster2515_2clades→ Cluster2268_2clades→                        | LRR-repeats+AP-GTPase+COR         | 973  | HND47_18110 | Chloroflexi         | Chloroflexi bacterium         | hypothetical protein HND47_18110 [Chloroflexi bacterium].                          | GCA_013112685.1 |
| NOQ25006.1 | Arginase→ REase→?→?→ LRR-repeats+AP-GTPase+COR+DrHyd*→                                                                             | LRR-repeats+AP-GTPase+COR+DrHyd   | 1054 | GQ564_06545 | Bacteroidetes       | Bacteroidales bacterium       | GTP-binding protein [Bacteroidales bacterium].                                     | GCA_013138975.1 |
| NOQ25654.1 | LRR-repeats+AP-GTPase+COR*→ FGS→ PSE→?→?→  <?<?<-REC                                                                               | LRR-repeats+AP-GTPase+COR         | 1082 | GQ564_09870 | Bacteroidetes       | Bacteroidales bacterium       | GTP-binding protein [Bacteroidales bacterium].                                     | GCA_013138975.1 |
| NOQ25870.1 | LRR-repeats+AP-GTPase+COR*→ Cluster881_3clades→ Polbeta+HEPN→  <?<-Cluster998_2clades<-?<-RADICAL-SAM                              | LRR-repeats+AP-GTPase+COR         | 983  | GQ564_10955 | Bacteroidetes       | Bacteroidales bacterium       | GTP-binding protein [Bacteroidales bacterium].                                     | GCA_013138975.1 |
| NOQ35071.1 | LRR-repeats+AP-GTPase+COR*→                                                                                                        | LRR-repeats+AP-GTPase+COR         | 779  | GQ569_04160 | Gammaproteobacteria | Methylococcaceae bacterium    | hypothetical protein GQ569_04160 [Methylococcaceae bacterium].                     | GCA_013138855.1 |
| NOQ64054.1 | LRR-repeats+AP-GTPase+COR+DrHyd*→                                                                                                  | LRR-repeats+AP-GTPase+COR+DrHyd   | 751  | GQ582_06035 | Gammaproteobacteria | Methyloprofundus sp.          | hypothetical protein GQ582_06035 [Methyloprofundus sp.].                           | GCA_013138595.1 |
| NOR78337.1 | LRR-repeats+AP-GTPase+COR*→                                                                                                        | LRR-repeats+AP-GTPase+COR         | 537  | GQ523_07950 | Euryarchaeota       | Methanophagales archaeon      | GTP-binding protein, partial [Methanophagales archaeon].                           | GCA_013139985.1 |
| NOS87464.1 | LRR-repeats+AP-GTPase+COR+TIR*→                                                                                                    | LRR-repeats+AP-GTPase+COR+TIR     | 972  | HOP34_02800 | Gammaproteobacteria | Methylococcaceae bacterium    | TIR domain-containing protein [Methylococcaceae bacterium].                        | GCA_013140465.1 |
| NOT10704.1 | Cluster2349_2clades→ PSE→?→ LRR-repeats+AP-GTPase+COR*→                                                                            | LRR-repeats+AP-GTPase+COR         | 810  | HOP23_02545 | Gammaproteobacteria | Methylococcaceae bacterium    | hypothetical protein HOP23_02545 [Methylococcaceae bacterium].                     | GCA_013140705.1 |
| NOT87605.1 | PNPase→?→ LRR-repeats+AP-GTPase+COR+TIR*→                                                                                          | LRR-repeats+AP-GTPase+COR+TIR     | 1152 | HOP03_05430 | Gammaproteobacteria | Lysobacter sp.                | TIR domain-containing protein [Lysobacter sp.].                                    | GCA_013141175.1 |
| NOU20113.1 | SIGMA-HTH→?→ LRR-repeats+AP-GTPase+COR+DrHyd*→ LRR-repeats+AP-GTPase+COR+DrHyd→                                                    | LRR-repeats+AP-GTPase+COR+DrHyd   | 1204 | HOO91_21360 | Bacteroidetes       | Bacteroidales bacterium       | hypothetical protein HOO91_21360 [Bacteroidales bacterium].                        | GCA_013141385.1 |
| NOU47191.1 | LRR-repeats+AP-GTPase+COR*→                                                                                                        | LRR-repeats+AP-GTPase+COR         | 693  | HOO86_09030 | Bacteroidetes       | Bacteroidales bacterium       | GTP-binding protein [Bacteroidales bacterium].                                     | GCA_013141455.1 |
| NOZ36014.1 | Cluster1478_2clades→?→?→?→?→ LRR-repeats+AP-GTPase+COR*→  <?<?  ?→?→ D5ATPase→                                                     | LRR-repeats+AP-GTPase+COR         | 842  | GXO80_12040 | Chlorobi            | Chlorobi bacterium            | GTP-binding protein [Chlorobi bacterium].                                          | GCA_013152535.1 |
| NQT12774.1 | LRR-repeats+AP-GTPase+COR+DUF4404*→                                                                                                | LRR-repeats+AP-GTPase+COR+DUF4404 | 936  | HQ582_08495 | Planctomycetes      | Planctomycetes bacterium      | leucine-rich repeat domain-containing protein, partial [Planctomycetes bacterium]. | GCA_013202485.1 |
| NQT13736.1 | LRR-repeats+AP-GTPase+COR*→ TIR→                                                                                                   | LRR-repeats+AP-GTPase+COR         | 583  | HQ582_13365 | Planctomycetes      | Planctomycetes bacterium      | hypothetical protein HQ582_13365, partial [Planctomycetes bacterium].              | GCA_013202485.1 |

| acc        | operon                                                                                                                 | architecture                      | len  | gen.name     | taxend                | species                              | define                                                                        | gca             |
|------------|------------------------------------------------------------------------------------------------------------------------|-----------------------------------|------|--------------|-----------------------|--------------------------------------|-------------------------------------------------------------------------------|-----------------|
| NQT64030.1 | TM+TM+TM→?→?→?→?→ SIG+LRR-repeats+AP-GTPase+COR+TIR*→                                                                  | SIG+LRR-repeats+AP-GTPase+COR+TIR | 1188 | HQ556_13800  | FCB group             | Candidatus Marinimicrobia bacterium  | TIR domain-containing protein [Candidatus Marinimicrobia bacterium].          | GCA_013202495.1 |
| NQT91808.1 | LRR-repeats+AP-GTPase+COR+DUF4404*→                                                                                    | LRR-repeats+AP-GTPase+COR+DUF4404 | 843  | HQ559_03535  | Lentisphaerae         | Lentisphaerae bacterium              | serine/threonine protein kinase [Lentisphaerae bacterium].                    | GCA_013202215.1 |
| NQU06371.1 | LRR-repeats+AP-GTPase+COR*→                                                                                            | LRR-repeats+AP-GTPase+COR         | 749  | HQ568_09785  | Calditrichaeota       | Calditrichaeota bacterium            | GTP-binding protein [Calditrichaeota bacterium].                              | GCA_013202805.1 |
| NQU20766.1 | LRR-repeats+AP-GTPase+COR+TIR*→                                                                                        | LRR-repeats+AP-GTPase+COR+TIR     | 813  | HQ567_05735  | Bacteria              | Candidatus Neelsonbacteria bacterium | TIR domain-containing protein [Candidatus Neelsonbacteria bacterium].         | GCA_013202865.1 |
| NQU25297.1 | LRR-repeats+AP-GTPase+COR*→ TIR→                                                                                       | LRR-repeats+AP-GTPase+COR         | 608  | HQ567_28770  | Bacteria              | Candidatus Neelsonbacteria bacterium | hypothetical protein HQ567_28770 [Candidatus Neelsonbacteria bacterium].      | GCA_013202865.1 |
| NQU51997.1 | LRR-repeats+AP-GTPase+COR+TIR*→                                                                                        | LRR-repeats+AP-GTPase+COR+TIR     | 946  | HQ522_05615  | Bacteroidetes         | Bacteroidetes bacterium              | leucine-rich repeat domain-containing protein [Bacteroidetes bacterium].      | GCA_013203755.1 |
| NQU93487.1 | RVT→ LRR-repeats+AP-GTPase+COR+TIR*→?→?→ TM+TM+TM→                                                                     | LRR-repeats+AP-GTPase+COR+TIR     | 903  | HQ540_23735  | Bacteroidetes         | Bacteroidetes bacterium              | TIR domain-containing protein [Bacteroidetes bacterium].                      | GCA_013203545.1 |
| NQY23053.1 | S4→?→?→?→?→ LRR-repeats+AP-GTPase+COR+DrHyd*→  <-?<-Cluster1695_2clades  TraJ-RHH→ RelE-ParE→?→?→ ACET→                | LRR-repeats+AP-GTPase+COR+DrHyd   | 962  | HRT41_03420  | Epsilonproteobacteria | Campylobacteraceae bacterium         | leucine-rich repeat domain-containing protein [Campylobacteraceae bacterium]. | GCA_013215945.1 |
| NQZ07155.1 | GDSL→ Cluster2260_2clades→ LRR-repeats+AP-GTPase+COR+E59-ABC*→?→ RelE→ CHTH→                                           | LRR-repeats+AP-GTPase+COR+E59-ABC | 1302 | HRT35_08335  | Gammaproteobacteria   | Algicola sp.                         | leucine-rich repeat domain-containing protein [Algicola sp.].                 | GCA_013216025.1 |
| NQZ07918.1 | LRR-repeats+AP-GTPase+COR*→                                                                                            | LRR-repeats+AP-GTPase+COR         | 815  | HRT35_12215  | Gammaproteobacteria   | Algicola sp.                         | GTP-binding protein [Algicola sp.].                                           | GCA_013216025.1 |
| NQZ09239.1 | <-MNS-STAND+CR-REase3  LRR-repeats+AP-GTPase+COR*→ Cluster5_5clades→                                                   | LRR-repeats+AP-GTPase+COR         | 1075 | HRT35_18935  | Gammaproteobacteria   | Algicola sp.                         | leucine-rich repeat domain-containing protein [Algicola sp.].                 | GCA_013216025.1 |
| NQZ10194.1 | LRR-repeats+AP-GTPase+COR+TIR*→?→  <-?<-HSP70                                                                          | LRR-repeats+AP-GTPase+COR+TIR     | 972  | HRT35_23840  | Gammaproteobacteria   | Algicola sp.                         | TIR domain-containing protein [Algicola sp.].                                 | GCA_013216025.1 |
| NQZ62063.1 | Cluster1136_2clades→?→  <-?  LRR-repeats+AP-GTPase+COR*→                                                               | LRR-repeats+AP-GTPase+COR         | 829  | HRT59_07970  | Cyanobacteria         | Crocospaera sp.                      | leucine-rich repeat domain-containing protein [Crocospaera sp.].              | GCA_013215395.1 |
| NQZ63007.1 | LRR-repeats+AP-GTPase+COR*→                                                                                            | LRR-repeats+AP-GTPase+COR         | 689  | HRT59_12970  | Cyanobacteria         | Crocospaera sp.                      | leucine-rich repeat domain-containing protein, partial [Crocospaera sp.].     | GCA_013215395.1 |
| NRA27019.1 | FGS→?→ FGS→ RVT→ FGS→ LRR-repeats+AP-GTPase+COR*→  <-?<-nSTAND3+REase-DUF4143<-tRNA<-?  Pro_CA→  <-Cluster1292_2clades | LRR-repeats+AP-GTPase+COR         | 859  | HRU10_07210  | Verrucomicrobia       | Opituales bacterium                  | hypothetical protein HRU10_07210 [Opituales bacterium].                       | GCA_013215165.1 |
| NRT54298.1 | LRR-repeats+AP-GTPase+COR+TIR*→  <-?<-ABC_membrane+ABC_tran  Cyanophycinsyn-ATPgrasp→ Cyanophycinsyn-ATPgrasp→         | LRR-repeats+AP-GTPase+COR+TIR     | 788  | HNQ01_000005 | Betaproteobacteria    | Leptothrix sp. C29                   | internalin A [Leptothrix sp. C29].                                            | GCA_013294065.1 |
| NTV46488.1 | LRR-repeats+AP-GTPase+COR+TIR*→                                                                                        | LRR-repeats+AP-GTPase+COR+TIR     | 657  | HGB11_08225  | Chlorobi              | Chlorobiales bacterium               | TIR domain-containing protein, partial [Chlorobiales bacterium].              | GCA_013334725.1 |
| NTV66504.1 | LRR-repeats+AP-GTPase+COR+TIR*→?→?→?→ PurT-ATPgrasp→                                                                   | LRR-repeats+AP-GTPase+COR+TIR     | 755  | HGB06_02250  | Chlorobi              | Chlorobaculum sp.                    | TIR domain-containing protein [Chlorobaculum sp.].                            | GCA_013334855.1 |
| NTV67443.1 | REase→  <-?<-SIG+TM  LRR-repeats+AP-GTPase+COR*→                                                                       | LRR-repeats+AP-GTPase+COR         | 453  | HGB06_07145  | Chlorobi              | Chlorobaculum sp.                    | hypothetical protein HGB06_07145 [Chlorobaculum sp.].                         | GCA_013334855.1 |
| NTW50168.1 | LRR-repeats+AP-GTPase+COR+TIR*→                                                                                        | LRR-repeats+AP-GTPase+COR+TIR     | 839  | HGB19_10655  | Chlorobi              | Chlorobiales bacterium               | TIR domain-containing protein [Chlorobiales bacterium].                       | GCA_013334605.1 |
| NTW54860.1 | LRR-repeats+AP-GTPase+COR*→?→?→?→?→?→?→ Cluster2062_2clades→                                                           | LRR-repeats+AP-GTPase+COR         | 1090 | HGB15_08930  | Chlorobi              | Chlorobaculum sp.                    | hypothetical protein HGB15_08930 [Chlorobaculum sp.].                         | GCA_013334655.1 |
| NTW70387.1 | DAM→ LRR-repeats+AP-GTPase+COR+TIR*→                                                                                   | LRR-repeats+AP-GTPase+COR+TIR     | 876  | HGB23_11195  | Chlorobi              | Chlorobiaceae bacterium              | TIR domain-containing protein [Chlorobiaceae bacterium].                      | GCA_013334485.1 |

| acc        | operon                                                                                                            | architecture                          | len  | gen.name    | taxend              | species                           | define                                                                                | gca             |
|------------|-------------------------------------------------------------------------------------------------------------------|---------------------------------------|------|-------------|---------------------|-----------------------------------|---------------------------------------------------------------------------------------|-----------------|
| NTW83729.1 | <-NUDIX  ?->?-> LRR-repeats+AP-GTPase+COR+TIR*->                                                                  | LRR-repeats+AP-GTPase+COR+TIR         | 892  | HGB36_10245 | Chlorobi            | Chlorobiaceae bacterium           | TIR domain-containing protein [Chlorobiaceae bacterium].                              | GCA_013334225.1 |
| NUM66201.1 | SHS2-> LRR-repeats+AP-GTPase+COR*->?->?-> Cluster1134_2clades-> SNF->                                             | LRR-repeats+AP-GTPase+COR             | 1051 | HUU39_13110 | Bacteria            | candidate division KSB1 bacterium | hypothetical protein HUU39_13110 [candidate division KSB1 bacterium].                 | GCA_013359425.1 |
| NUM68318.1 | LRR-repeats+AP-GTPase+COR*->?->?-> FGS->                                                                          | LRR-repeats+AP-GTPase+COR             | 955  | HUU39_24115 | Bacteria            | candidate division KSB1 bacterium | leucine-rich repeat domain-containing protein [candidate division KSB1 bacterium].    | GCA_013359425.1 |
| NUO01599.1 | <-S18-HTH<-Cluster1004_3clades<-?<-?<-?  FGS-> LRR-repeats+_AP-GTPase+COR+EAD11+TIR*-> FGS->                      | LRR-repeats+_AP-GTPase+COR+EAD11+TIR  | 1085 | HUU01_13415 | Bacteroidetes       | Saprospiraceae bacterium          | TIR domain-containing protein [Saprospiraceae bacterium].                             | GCA_013361075.1 |
| NUO02098.1 | LRR-repeats+AP-GTPase+COR+TM+TM+TM*->?->  <-Cluster2427_2clades                                                   | LRR-repeats+AP-GTPase+COR+TM+TM+TM    | 791  | HUU01_15950 | Bacteroidetes       | Saprospiraceae bacterium          | hypothetical protein HUU01_15950, partial [Saprospiraceae bacterium].                 | GCA_013361075.1 |
| NUO79752.1 | SIG+7TMR-DISMED1->  <-?<-?  LRR-repeats+AP-GTPase+COR+TIR*->  <-Cluster2261_2clades<-RlaP  SIG+TIMbarrel->        | LRR-repeats+AP-GTPase+COR+TIR         | 968  | HUU05_06725 | Bacteria            | candidate division KSB1 bacterium | leucine-rich repeat domain-containing protein [candidate division KSB1 bacterium].    | GCA_013361015.1 |
| NUO80023.1 | ABhydrolase->?-> Cluster1134_2clades->?-> LRR-repeats+AP-GTPase+COR*->                                            | LRR-repeats+AP-GTPase+COR             | 824  | HUU05_08095 | Bacteria            | candidate division KSB1 bacterium | leucine-rich repeat domain-containing protein [candidate division KSB1 bacterium].    | GCA_013361015.1 |
| NUO97795.1 | LRR-repeats+AP-GTPase+COR*->                                                                                      | LRR-repeats+AP-GTPase+COR             | 986  | HOW59_07675 | Actinobacteria      | Nonomurea sp.                     | hypothetical protein HOW59_07675, partial [Nonomurea sp.].                            | GCA_013361365.1 |
| NUP68620.1 | LRR-repeats+AP-GTPase+COR*->                                                                                      | LRR-repeats+AP-GTPase+COR             | 1447 | HOW71_41335 | Actinobacteria      | Nonomurea sp.                     | hypothetical protein HOW71_41335 [Nonomurea sp.].                                     | GCA_013361665.1 |
| NUQ24465.1 | FGS->?->  <-?  EAD11+LRR-repeats+S1+S1+AP-GTPase+COR*->                                                           | EAD11+LRR-repeats+S1+S1+AP-GTPase+COR | 1140 | HUU34_10980 | Bacteroidetes       | Saprospiraceae bacterium          | leucine-rich repeat domain-containing protein [Saprospiraceae bacterium].             | GCA_013360405.1 |
| NUQ25704.1 | PIN-> FGS->?-> RVT->?-> LRR-repeats+AP-GTPase+COR+TIR*->?->?->?-> TM+TM+TM->                                      | LRR-repeats+AP-GTPase+COR+TIR         | 826  | HUU34_17280 | Bacteroidetes       | Saprospiraceae bacterium          | TIR domain-containing protein [Saprospiraceae bacterium].                             | GCA_013360405.1 |
| NUQ26825.1 | LRR-repeats+AP-GTPase+COR+TM*-> FGS->                                                                             | LRR-repeats+AP-GTPase+COR+TM          | 924  | HUU34_23015 | Bacteroidetes       | Saprospiraceae bacterium          | hypothetical protein HUU34_23015 [Saprospiraceae bacterium].                          | GCA_013360405.1 |
| NUQ46249.1 | LRR-repeats+AP-GTPase+COR*-> ABC_membrane+ABC_tran->                                                              | LRR-repeats+AP-GTPase+COR             | 843  | HUU22_09465 | Planctomycetes      | Phycisphaerae bacterium           | leucine-rich repeat domain-containing protein, partial [Phycisphaerae bacterium].     | GCA_013360645.1 |
| NUQ73394.1 | LRR-repeats+AP-GTPase+COR+TM+TM*->                                                                                | LRR-repeats+AP-GTPase+COR+TM+TM       | 869  | HUU21_07550 | Deltaproteobacteria | Polyangiaceae bacterium           | GTP-binding protein [Polyangiaceae bacterium].                                        | GCA_013360665.1 |
| NUQ87064.1 | LRR-repeats+AP-GTPase+COR*->                                                                                      | LRR-repeats+AP-GTPase+COR             | 767  | HOQ43_01165 | Actinobacteria      | Glycomyces artemisiae             | hypothetical protein HOQ43_01165 [Glycomyces artemisiae].                             | GCA_013361895.1 |
| NUR27723.1 | REC->?->?->?-> LRR-repeats+AP-GTPase+COR*->                                                                       | LRR-repeats+AP-GTPase+COR             | 958  | HOV83_18080 | Actinobacteria      | Catenulispora sp.                 | hypothetical protein HOV83_18080 [Catenulispora sp.].                                 | GCA_013362085.1 |
| NUS08684.1 | LRR-repeats+AP-GTPase+COR*->                                                                                      | LRR-repeats+AP-GTPase+COR             | 1447 | HOV97_39690 | Actinobacteria      | Nonomurea sp.                     | hypothetical protein HOV97_39690 [Nonomurea sp.].                                     | GCA_013362305.1 |
| NVM16177.1 | LRR-repeats+AP-GTPase+COR*->                                                                                      | LRR-repeats+AP-GTPase+COR             | 1327 | HWN80_00570 | Asgard group        | Candidatus Lokiarchaeota archaeon | leucine-rich repeat protein [Candidatus Lokiarchaeota archaeon].                      | GCA_013375495.1 |
| NVM57338.1 | LRR-repeats+AP-GTPase+COR*->                                                                                      | LRR-repeats+AP-GTPase+COR             | 588  | HWN51_04390 | Deltaproteobacteria | Desulfobacterales bacterium       | leucine-rich repeat domain-containing protein, partial [Desulfobacterales bacterium]. | GCA_013375265.1 |
| NVO09292.1 | <-SIG+TM+VWA+TM<-SIG+TM+VWA+TM<-?<-VWA<-?<-MoxR-AAA  ?-> LRR-repeats+AP-GTPase+COR*->?->?->?->  <-?<-?<-?  DSBH-> | LRR-repeats+AP-GTPase+COR             | 965  | HXX16_04945 | Bacteroidetes       | Bacteroidales bacterium           | leucine-rich repeat domain-containing protein [Bacteroidales bacterium].              | GCA_013376985.1 |

| acc        | operon                                                                                                           | architecture                      | len  | gen.name    | taxend              | species                                            | define                                                                                    | gca             |
|------------|------------------------------------------------------------------------------------------------------------------|-----------------------------------|------|-------------|---------------------|----------------------------------------------------|-------------------------------------------------------------------------------------------|-----------------|
| NZD48025.1 | LRR-repeats+AP-GTPase+COR+TIR*→  <?<-ABC_membrane+ABC_tran  Cyanophycinsyn-ATPgrasp→ Cyanophycinsyn-ATPgrasp→    | LRR-repeats+AP-GTPase+COR+TIR     | 885  | HZU84_19525 | Betaproteobacteria  | Sphaerotilus natans subsp. sulfidivorans           | leucine-rich repeat domain-containing protein [Sphaerotilus natans subsp. sulfidivorans]. | GCA_013426975.1 |
| OAB01099.1 | LRR-repeats+AP-GTPase+COR*→  <?  ?→  <?<-SIGMA-HTH<-SIGMA-HTH                                                    | LRR-repeats+AP-GTPase+COR         | 996  | A6P39_08275 | Actinobacteria      | Streptomyces sp. FXJ1.172                          | hypothetical protein A6P39_08275 [Streptomyces sp. FXJ1.172].                             | GCA_001636945.1 |
| OAI12102.1 | Cluster5_5clades→?→?→ HTH→ LRR-repeats+AP-GTPase+COR+TIR*→ Cluster1019_2clades→?→  <?<-?<-?  Cluster833_2clades→ | LRR-repeats+AP-GTPase+COR+TIR     | 1065 | A1507_19115 | Gammaproteobacteria | Methylomonas koyamae                               | hypothetical protein A1507_19115 [Methylomonas koyamae].                                  | GCA_001644135.1 |
| OBQ24605.1 | S18-HTH→?→  <-tRNA  Ferredoxin-betagrasp→?→?→ LRR-repeats+AP-GTPase+COR*→?→  <-?  TM→                            | LRR-repeats+AP-GTPase+COR         | 1095 | AN488_00160 | Cyanobacteria       | Anabaena sp. WA113                                 | GTPase [Anabaena sp. WA113].                                                              | GCA_001672155.1 |
| OBQ25153.1 | LRR-repeats+AP-GTPase+COR*→?→  <-?  TM→                                                                          | LRR-repeats+AP-GTPase+COR         | 780  | AN481_11440 | Cyanobacteria       | Aphanizomenon flos-aquae LD13                      | hypothetical protein AN481_11440, partial [Aphanizomenon flos-aquae LD13].                | GCA_001672165.1 |
| OBQ31054.1 | S18-HTH→?→  <-tRNA  Ferredoxin-betagrasp→?→?→ LRR-repeats+AP-GTPase+COR*→?→  <-?  TM→                            | LRR-repeats+AP-GTPase+COR         | 942  | AN483_02530 | Cyanobacteria       | Aphanizomenon flos-aquae MDT14a                    | hypothetical protein AN483_02530 [Aphanizomenon flos-aquae MDT14a].                       | GCA_001672095.1 |
| OBQ35403.1 | LRR-repeats+AP-GTPase+COR*→  <-?<-sGTP+sGTP  ?→  <-REC                                                           | LRR-repeats+AP-GTPase+COR         | 799  | AN487_15705 | Cyanobacteria       | Anabaena sp. CRKS33                                | hypothetical protein AN487_15705, partial [Anabaena sp. CRKS33].                          | GCA_001672075.1 |
| OBQ36155.1 | LRR-repeats+AP-GTPase+COR*→                                                                                      | LRR-repeats+AP-GTPase+COR         | 567  | AN484_25870 | Cyanobacteria       | Aphanizomenon flos-aquae WA102                     | GTPase, partial [Aphanizomenon flos-aquae WA102].                                         | GCA_001672105.1 |
| OCQ90934.1 | LRR-repeats+AP-GTPase+COR→ LRR-repeats+AP-GTPase+COR→?→ LRR-repeats+AP-GTPase+COR→                               | LRR-repeats+AP-GTPase+COR         | 795  | BCR12_04520 | Cyanobacteria       | Limnothrix sp. P13C2                               | hypothetical protein BCR12_04520 [Limnothrix sp. P13C2].                                  | GCA_001698445.1 |
| OCQ90935.1 | LRR-repeats+AP-GTPase+COR*→                                                                                      | LRR-repeats+AP-GTPase+COR         | 952  | BCR12_04525 | Cyanobacteria       | Limnothrix sp. P13C2                               | hypothetical protein BCR12_04525 [Limnothrix sp. P13C2].                                  | GCA_001698445.1 |
| OCQ97014.1 | TPR-repeats→?→?→ CASPASE+TM+TPR→?→?→?→ LRR-repeats+AP-GTPase+COR+DUF4404*→  <-?<-?  ?→  <-?  REC→                | LRR-repeats+AP-GTPase+COR+DUF4404 | 833  | BCD64_15615 | Cyanobacteria       | Nostoc sp. MBR 210                                 | GTP-binding protein [Nostoc sp. MBR 210].                                                 | GCA_001698435.1 |
| OCR00628.1 | LRR-repeats+AP-GTPase+COR+TM+TM*→  <-?<-?  ?→  <-?  ?→  <-PRTase<-SIG+TM+TM+TM+TM                                | LRR-repeats+AP-GTPase+COR+TM+TM   | 689  | BCD67_11660 | Cyanobacteria       | Oscillatoriales cyanobacterium USR001              | GTPase, partial [Oscillatoriales cyanobacterium USR001].                                  | GCA_001698425.1 |
| OCW73618.1 | LRR-repeats+AP-GTPase+COR*→                                                                                      | LRR-repeats+AP-GTPase+COR         | 918  | A4G24_00320 | Bacteroidetes       | Elizabethkingia anophelis                          | hypothetical protein A4G24_00320 [Elizabethkingia anophelis].                             | GCA_001703835.1 |
| ODG98072.1 | LRR-repeats+AP-GTPase+COR+TIR*→  <-CASPASE+TM                                                                    | LRR-repeats+AP-GTPase+COR+TIR     | 858  | A4S05_10875 | Cyanobacteria       | Nostoc sp. KVJ20                                   | hypothetical protein A4S05_10875, partial [Nostoc sp. KVJ20].                             | GCA_001712795.1 |
| ODS35505.1 | Cluster846_3clades→ LRR-repeats→ LRR-repeats+AP-GTPase+COR*→?→ VWa→                                              | LRR-repeats+AP-GTPase+COR         | 644  | A7316_10690 | DPANN group         | Candidatus Altiarchaeales archaeon WOR_SM1_86-2    | hypothetical protein A7316_10690 [Candidatus Altiarchaeales archaeon WOR_SM1_86-2].       | GCA_001723855.1 |
| ODS40288.1 | LRR-repeats+AP-GTPase+CASPASE*→                                                                                  | LRR-repeats+AP-GTPase+CASPASE     | 811  | A7315_09000 | DPANN group         | Candidatus Altiarchaeales archaeon WOR_SM1_79      | hypothetical protein A7315_09000 [Candidatus Altiarchaeales archaeon WOR_SM1_79].         | GCA_001723835.1 |
| OED06513.1 | LRR-repeats+AP-GTPase+COR*→                                                                                      | LRR-repeats+AP-GTPase+COR         | 666  | A9239_11540 | Euryarchaeota       | Methanosarcina sp. A14                             | hypothetical protein A9239_11540 [Methanosarcina sp. A14].                                | GCA_001729375.1 |
| OEU63639.1 | LRR-repeats→ LRR-repeats+AP-GTPase+COR*→                                                                         | LRR-repeats+AP-GTPase+COR         | 623  | BBJ57_05215 | Deltaproteobacteria | Desulfobacteriales bacterium PC51MH44              | hypothetical protein BBJ57_05215 [Desulfobacteriales bacterium PC51MH44].                 | GCA_001751165.1 |
| OFX48341.1 | ABC-ATPase→?→ LRR-repeats+AP-GTPase+COR*→                                                                        | LRR-repeats+AP-GTPase+COR         | 720  | A2X10_07060 | Bacteroidetes       | Bacteroidetes bacterium GWA2_33_15                 | hypothetical protein A2X10_07060 [Bacteroidetes bacterium GWA2_33_15].                    | GCA_001769045.1 |
| OFX79107.1 | LRR-repeats+AP-GTPase+COR+REase7*→                                                                               | LRR-repeats+AP-GTPase+COR+REase7  | 1101 | A2X12_10435 | Bacteroidetes       | Bacteroidetes bacterium GWE2_29_8                  | hypothetical protein A2X12_10435 [Bacteroidetes bacterium GWE2_29_8].                     | GCA_001769085.1 |
| OFY84271.1 | LRR-repeats→ LRR-repeats+AP-GTPase+COR+REase7*→                                                                  | LRR-repeats+AP-GTPase+COR+REase7  | 598  | A3F72_14720 | Bacteroidetes       | Bacteroidetes bacterium RIFC-SPLOWO2_12_FULL_35_15 | hypothetical protein A3F72_14720 [Bacteroidetes bacterium RIFC-SPLOWO2_12_FULL_35_15].    | GCA_001769385.1 |

| acc        | operon                                                                                                           | architecture                                | len  | gen.name    | taxend              | species                                                      | define                                                                                           | gca             |
|------------|------------------------------------------------------------------------------------------------------------------|---------------------------------------------|------|-------------|---------------------|--------------------------------------------------------------|--------------------------------------------------------------------------------------------------|-----------------|
| OGC77574.1 | LRR-repeats+AP-GTPase+COR*→?→  <?<-CCTBP                                                                         | LRR-repeats+AP-GTPase+COR                   | 975  | A2Z27_00115 | FCB group           | candidate division<br>Zixibacteria bacterium<br>RBG_16_50_21 | hypothetical protein A2Z27_00115<br>[candidate division Zixibacteria<br>bacterium RBG_16_50_21]. | GCA_001773465.1 |
| OGH99179.1 | LRR-repeats+AP-GTPase+COR*→                                                                                      | LRR-repeats+AP-GTPase+COR                   | 572  | A2X43_07200 | Terrabacteria group | Candidatus<br>Margulisbacteria bacterium<br>GWD2_39_127      | hypothetical protein A2X43_07200<br>[Candidatus Margulisbacteria<br>bacterium GWD2_39_127].      | GCA_001783265.1 |
| OGV70404.1 | Pkinase+LRR-repeats+AP-GTPase+COR+TM+TM*→                                                                        | Pkinase+LRR-repeats+AP-<br>GTPase+COR+TM+TM | 1157 | A2283_19020 | Lentisphaerae       | Lentisphaerae bacterium<br>RI-<br>FOXYA12_FULL_48_11         | hypothetical protein A2283_19020<br>[Lentisphaerae bacterium<br>RI-<br>RIFOXYA12_FULL_48_11].    | GCA_001804885.1 |
| OHB50686.1 | S1COLD→ LRR-repeats+AP-GTPase+COR+TIR*→                                                                          | LRR-repeats+AP-<br>GTPase+COR+TIR           | 953  | A2Y10_02350 | Planctomycetes      | Planctomycetes bacterium<br>GWF2_41_51                       | hypothetical protein A2Y10_02350<br>[Planctomycetes bacterium<br>GWF2_41_51].                    | GCA_001825665.1 |
| OHB52204.1 | LRR-repeats+AP-GTPase+COR*→?→  <?  SIG+TM→                                                                       | LRR-repeats+AP-GTPase+COR                   | 1147 | A2Y10_11365 | Planctomycetes      | Planctomycetes bacterium<br>GWF2_41_51                       | hypothetical protein A2Y10_11365<br>[Planctomycetes bacterium<br>GWF2_41_51].                    | GCA_001825665.1 |
| OHB64560.1 | REC→ TPR-repeats→  <?  PSE→  <?<-?<-?  YBAK→ LRR-repeats+AP-GTPase+COR+DUF4404*→                                 | LRR-repeats+AP-<br>GTPase+COR+DUF4404       | 740  | A2Y76_11060 | Planctomycetes      | Planctomycetes bacterium<br>RBG_13_60_9                      | hypothetical protein A2Y76_11060<br>[Planctomycetes bacterium<br>RBG_13_60_9].                   | GCA_001824685.1 |
| OHD05988.1 | LRR-repeats+AP-GTPase+COR+TM+TM*→ TraJ-RHH→ RelE-ParE→                                                           | LRR-repeats+AP-<br>GTPase+COR+TM+TM         | 1257 | A2Z98_10570 | Spirochaetes        | Spirochaetes bacterium<br>GWB1_27_13                         | hypothetical protein A2Z98_10570<br>[Spirochaetes bacterium<br>GWB1_27_13].                      | GCA_001829125.1 |
| OHD18029.1 | MORC→?→?→?→  <?<-PSE<-?  LRR-repeats+AP-GTPase+COR→  <-?<-?<-?  ?→?→?→?→ REC→  <-LRR-repeats+AP-GTPase+COR+DrHyd | LRR-repeats+AP-GTPase+COR                   | 1064 | A2Z98_11125 | Spirochaetes        | Spirochaetes bacterium<br>GWB1_27_13                         | hypothetical protein A2Z98_11125<br>[Spirochaetes bacterium<br>GWB1_27_13].                      | GCA_001829125.1 |
| OHD18038.1 | LRR-repeats+AP-GTPase+COR+DrHyd*→                                                                                | LRR-repeats+AP-<br>GTPase+COR+DrHyd         | 986  | A2Z98_11170 | Spirochaetes        | Spirochaetes bacterium<br>GWB1_27_13                         | hypothetical protein A2Z98_11170<br>[Spirochaetes bacterium<br>GWB1_27_13].                      | GCA_001829125.1 |
| OHD26231.1 | LRR-repeats+AP-GTPase+COR+TM+TM*→ TraJ-RHH→ RelE-ParE→                                                           | LRR-repeats+AP-<br>GTPase+COR+TM+TM         | 1234 | A2Y34_11235 | Spirochaetes        | Spirochaetes bacterium<br>GWC1_27_15                         | hypothetical protein A2Y34_11235<br>[Spirochaetes bacterium<br>GWC1_27_15].                      | GCA_001829235.1 |
| OHD42853.1 | MORC→?→?→?→  <?<-PSE<-?  LRR-repeats+AP-GTPase+COR→  <-?<-?<-?  ?→?→?→?→ REC→  <-LRR-repeats+AP-GTPase+COR+DrHyd | LRR-repeats+AP-GTPase+COR                   | 1020 | A2086_15855 | Spirochaetes        | Spirochaetes bacterium<br>GWD1_27_9                          | hypothetical protein A2086_15855<br>[Spirochaetes bacterium<br>GWD1_27_9].                       | GCA_001830585.1 |
| OIO84219.1 | <-XIS-HTH  HTH+HTH→  <-WLM  ?→ NACHT+68TM-wHTH→ REase→?→ LRR-repeats+AP-GTPase+COR*→                             | LRR-repeats+AP-GTPase+COR                   | 1004 | AUK01_09955 | Chloroflexi         | Anaerolineae bacterium<br>CG2_30_57_67                       | hypothetical protein AUK01_09955,<br>partial [Anaerolineae bacterium<br>CG2_30_57_67].           | GCA_001872455.1 |
| OJJ15121.1 | LRR-repeats+AP-GTPase+COR*→                                                                                      | LRR-repeats+AP-GTPase+COR                   | 1037 | BKI52_39320 | Bacteroidetes       | marine bacterium AO1-C                                       | hypothetical protein BKI52_39320<br>[marine bacterium AO1-C].                                    | GCA_001890965.1 |
| OJJ19161.1 | LRR-repeats+AP-GTPase+COR*→                                                                                      | LRR-repeats+AP-GTPase+COR                   | 851  | BKI52_20325 | Bacteroidetes       | marine bacterium AO1-C                                       | hypothetical protein BKI52_20325<br>[marine bacterium AO1-C].                                    | GCA_001890965.1 |
| OJJ19619.1 | LRR-repeats+AP-GTPase+COR*→  <?<-?<-?<-?<-TetR-HTH                                                               | LRR-repeats+AP-GTPase+COR                   | 723  | BKI52_22705 | Bacteroidetes       | marine bacterium AO1-C                                       | hypothetical protein BKI52_22705,<br>partial [marine bacterium AO1-C].                           | GCA_001890965.1 |
| OJJ19690.1 | <-Four-helical-protein<-?<-?<-?<-?  LRR-repeats+AP-GTPase+COR*→                                                  | LRR-repeats+AP-GTPase+COR                   | 1463 | BKI52_19350 | Bacteroidetes       | marine bacterium AO1-C                                       | hypothetical protein BKI52_19350<br>[marine bacterium AO1-C].                                    | GCA_001890965.1 |
| OJJ20943.1 | Cluster2042_2clades→  <?<-?  ?→?→?→  <-?  LRR-repeats+AP-GTPase+COR+EAD11*→  <-PAS+HISKIN                        | LRR-repeats+AP-<br>GTPase+COR+EAD11         | 871  | BKI52_10210 | Bacteroidetes       | marine bacterium AO1-C                                       | hypothetical protein BKI52_10210<br>[marine bacterium AO1-C].                                    | GCA_001890965.1 |
| OJJ21241.1 | LRR-repeats+AP-GTPase+COR*→?→  <?<-cNMPBD                                                                        | LRR-repeats+AP-GTPase+COR                   | 910  | BKI52_11795 | Bacteroidetes       | marine bacterium AO1-C                                       | hypothetical protein BKI52_11795<br>[marine bacterium AO1-C].                                    | GCA_001890965.1 |
| OJJ22385.1 | <-SIGMA-HTH  ?→?→?→?→  <-?  LRR-repeats+AP-GTPase+COR*→?→?→?→  <-?<-?<-?<-SIGMA-HTH                              | LRR-repeats+AP-GTPase+COR                   | 1192 | BKI52_06800 | Bacteroidetes       | marine bacterium AO1-C                                       | hypothetical protein BKI52_06800<br>[marine bacterium AO1-C].                                    | GCA_001890965.1 |
| OJJ23263.1 | D5ATPase→?→ LRR-repeats+AP-GTPase+COR*→                                                                          | LRR-repeats+AP-GTPase+COR                   | 1296 | BKI52_02595 | Bacteroidetes       | marine bacterium AO1-C                                       | hypothetical protein BKI52_02595<br>[marine bacterium AO1-C].                                    | GCA_001890965.1 |

| acc        | operon                                                                                                   | architecture                      | len  | gen.name       | taxend              | species                                    | define                                                                            | gca             |
|------------|----------------------------------------------------------------------------------------------------------|-----------------------------------|------|----------------|---------------------|--------------------------------------------|-----------------------------------------------------------------------------------|-----------------|
| OJJ23599.1 | SF2-DUF3427A→?→ TRD+TRD→?→?→ LRR-repeats+AP-GTPase+COR*→?→  <-?<-LRR-repeats<-?  cNMPBD→                 | LRR-repeats+AP-GTPase+COR         | 1001 | BKI52_04350    | Bacteroidetes       | marine bacterium AO1-C                     | hypothetical protein BKI52_04350 [marine bacterium AO1-C].                        | GCA_001890965.1 |
| OKH11101.1 | LRR-repeats+AP-GTPase+COR+TM+TM*→                                                                        | LRR-repeats+AP-GTPase+COR+TM+TM   | 944  | NIES208_17750  | Cyanobacteria       | Limnothrix rosea IAM M-220                 | hypothetical protein NIES208_17750 [Limnothrix rosea IAM M-220].                  | GCA_001904615.1 |
| OKH34496.1 | LRR-repeats+AP-GTPase+COR+TM+TM*→  <-CASPASE+TPR                                                         | LRR-repeats+AP-GTPase+COR+TM+TM   | 902  | FACHB389_15645 | Cyanobacteria       | Nostoc calcicola FACHB-389                 | GTPase [Nostoc calcicola FACHB-389].                                              | GCA_001904715.1 |
| OLE55789.1 | <-RFC-AAA<-?<-Trichomonas-DAM<-?<-?<-ISOCOT  LRR-repeats+AP-GTPase+COR+TIR*→                             | LRR-repeats+AP-GTPase+COR+TIR     | 862  | AUG51_01855    | Acidobacteria       | Acidobacteria bacterium 13_1_20CM_3_53_8   | serine/threonine protein kinase [Acidobacteria bacterium 13_1_20CM_3_53_8].       | GCA_001920415.1 |
| OLF12412.1 | LRR-repeats+AP-GTPase+COR*→?→?→?→  <-?<-ABC-ATPase+ABC-ATPase                                            | LRR-repeats+AP-GTPase+COR         | 927  | BLA60_09370    | Actinobacteria      | Actinophytocola xinjiangensis              | hypothetical protein BLA60_09370 [Actinophytocola xinjiangensis].                 | GCA_001921215.1 |
| OQX01793.1 | LRR-repeats+AP-GTPase+COR+TIR*→  <-?<-PSE<-?<-PSE<-PSE<-?<-?<-?  PSE→  <-?  ABhydrolase→                 | LRR-repeats+AP-GTPase+COR+TIR     | 928  | BWK73_44950    | Gammaproteobacteria | Thiothrix lacustris                        | GTP-binding protein [Thiothrix lacustris].                                        | GCA_002083875.1 |
| OQX02054.1 | nSTAND3+REase-DUF4143→ LRR-repeats+AP-GTPase+COR*→ TIR→?→  <-Thioredoxin                                 | LRR-repeats+AP-GTPase+COR         | 784  | BWK73_43990    | Gammaproteobacteria | Thiothrix lacustris                        | hypothetical protein BWK73_43990 [Thiothrix lacustris].                           | GCA_002083875.1 |
| OQX07365.1 | LRR-repeats+AP-GTPase+COR+CASPASE*→                                                                      | LRR-repeats+AP-GTPase+COR+CASPASE | 879  | BWK80_49550    | Deltaproteobacteria | Desulfobacteraceae bacterium IS3           | hypothetical protein BWK80_49550 [Desulfobacteraceae bacterium IS3].              | GCA_002083955.1 |
| OQX24659.1 | LRR-repeats+AP-GTPase+COR→ Cluster2372_2clades→?→ LRR-repeats+AP-GTPase+COR→ LRR-repeats+AP-GTPase+COR*→ | LRR-repeats+AP-GTPase+COR         | 881  | BWK80_19660    | Deltaproteobacteria | Desulfobacteraceae bacterium IS3           | hypothetical protein BWK80_19660 [Desulfobacteraceae bacterium IS3].              | GCA_002083955.1 |
| OQX24662.1 | LRR-repeats+AP-GTPase+COR+TM*→                                                                           | LRR-repeats+AP-GTPase+COR+TM      | 925  | BWK80_19675    | Deltaproteobacteria | Desulfobacteraceae bacterium IS3           | hypothetical protein BWK80_19675 [Desulfobacteraceae bacterium IS3].              | GCA_002083955.1 |
| OQX24663.1 | LRR-repeats+AP-GTPase+COR*→                                                                              | LRR-repeats+AP-GTPase+COR         | 870  | BWK80_19680    | Deltaproteobacteria | Desulfobacteraceae bacterium IS3           | hypothetical protein BWK80_19680 [Desulfobacteraceae bacterium IS3].              | GCA_002083955.1 |
| OQX25920.1 | LRR-repeats+AP-GTPase+COR*→?→?→?→?→ ABC-ATPase→ SIG+TM+TM+TM+TM+TM+TM→  <-Cluster968_2clades             | LRR-repeats+AP-GTPase+COR         | 802  | BWK80_13160    | Deltaproteobacteria | Desulfobacteraceae bacterium IS3           | hypothetical protein BWK80_13160 [Desulfobacteraceae bacterium IS3].              | GCA_002083955.1 |
| OQY27201.1 | LRR-repeats+AP-GTPase+COR*→?→  <-?<-?<-?  TM+TM+TM+TM+TM+TM→                                             | LRR-repeats+AP-GTPase+COR         | 700  | B6244_11350    | FCB group           | Candidatus Cloacimonetes bacterium 4572_55 | hypothetical protein B6244_11350 [Candidatus Cloacimonetes bacterium 4572_55].    | GCA_002084765.1 |
| OQY46926.1 | LRR-repeats+AP-GTPase+COR*→  <-PSE  ?→ LRR-repeats→                                                      | LRR-repeats+AP-GTPase+COR         | 887  | B6247_27150    | Gammaproteobacteria | Beggiatoa sp. 4572_84                      | GTPase [Beggiatoa sp. 4572_84].                                                   | GCA_002085445.1 |
| OQY52602.1 | SIG+TM+TM+TM+TM+TM+TM+TM+TM→?→?→?→?→ LRR-repeats+AP-GTPase+COR→?→?→?→ LRR-repeats+AP-GTPase+COR→         | LRR-repeats+AP-GTPase+COR         | 429  | B6245_23480    | Deltaproteobacteria | Desulfobacteraceae bacterium 4572_88       | hypothetical protein B6245_23480, partial [Desulfobacteraceae bacterium 4572_88]. | GCA_002085455.1 |
| OQY52606.1 | LRR-repeats+AP-GTPase+COR*→                                                                              | LRR-repeats+AP-GTPase+COR         | 933  | B6245_23500    | Deltaproteobacteria | Desulfobacteraceae bacterium 4572_88       | hypothetical protein B6245_23500 [Desulfobacteraceae bacterium 4572_88].          | GCA_002085455.1 |
| OQY56003.1 | CBS→ PSE→  <-?  ?→?→ LRR-repeats→?→ PSE→ LRR-repeats→ LRR-repeats+AP-GTPase+COR*→                        | LRR-repeats+AP-GTPase+COR         | 907  | B6247_05655    | Gammaproteobacteria | Beggiatoa sp. 4572_84                      | GTPase [Beggiatoa sp. 4572_84].                                                   | GCA_002085445.1 |
| OQY58390.1 | LRR-repeats+AP-GTPase+COR*→ SIG+DADALIGASE-ATPgrasp→                                                     | LRR-repeats+AP-GTPase+COR         | 791  | B6245_12095    | Deltaproteobacteria | Desulfobacteraceae bacterium 4572_88       | hypothetical protein B6245_12095 [Desulfobacteraceae bacterium 4572_88].          | GCA_002085455.1 |
| OSM01684.1 | SIGMA-HTH→?→  <-?<-?<-?<-?<-?  LRR-repeats+AP-GTPase+COR*→                                               | LRR-repeats+AP-GTPase+COR         | 876  | MAIT1_01702    | Alphaproteobacteria | Magnetofaba australis IT-1                 | putative small GTP-binding protein [Magnetofaba australis IT-1].                  | GCA_002109495.1 |
| OUC12119.1 | LRR-repeats+AP-GTPase+COR+DrHyd*→?→?→ FGS→                                                               | LRR-repeats+AP-GTPase+COR+DrHyd   | 810  | B0A82_24265    | Cyanobacteria       | Alkalinema sp. CACIAM 70d                  | hypothetical protein B0A82_24265, partial [Alkalinema sp. CACIAM 70d].            | GCA_002148405.1 |
| OUC12470.1 | <-HISKIN<-?<-?<-PRTase<-?  ?→ LRR-repeats+AP-GTPase+COR*→                                                | LRR-repeats+AP-GTPase+COR         | 820  | B0A82_22225    | Cyanobacteria       | Alkalinema sp. CACIAM 70d                  | hypothetical protein B0A82_22225 [Alkalinema sp. CACIAM 70d].                     | GCA_002148405.1 |
| OUC13078.1 | <-TIR+TM+CHASE2+CHASE2+TM+TM+TM<-SIG+RnaseT2<-?  ?→?→ LRR-repeats+AP-GTPase+COR*→                        | LRR-repeats+AP-GTPase+COR         | 919  | B0A82_18905    | Cyanobacteria       | Alkalinema sp. CACIAM 70d                  | GTPase [Alkalinema sp. CACIAM 70d].                                               | GCA_002148405.1 |
| OUC15727.1 | LRR-repeats+AP-GTPase+COR+DUF4404*→?→  <-Cluster2098_2clades                                             | LRR-repeats+AP-GTPase+COR+DUF4404 | 969  | B0A82_05270    | Cyanobacteria       | Alkalinema sp. CACIAM 70d                  | hypothetical protein B0A82_05270, partial [Alkalinema sp. CACIAM 70d].            | GCA_002148405.1 |



| acc        | operon                                                                                                                                                                                       | architecture                               | len  | gen.name    | taxend              | species                                            | define                                                                                          | gca             |
|------------|----------------------------------------------------------------------------------------------------------------------------------------------------------------------------------------------|--------------------------------------------|------|-------------|---------------------|----------------------------------------------------|-------------------------------------------------------------------------------------------------|-----------------|
| OWK46761.1 | <-Aminotran_1_2  LRR-repeats+AP-GTPase+COR+TIR*->  <-?<-?<-?<-DSBH+AraC-HTH+AraC-HTH  ?->?-> SIG+TM+TM+TM->                                                                                  | LRR-repeats+AP-GTPase+COR+TIR              | 1310 | FRUB_00460  | Planctomycetes      | Fimbriiglobus ruber                                | HtrA protease/chaperone protein [Fimbriiglobus ruber].                                          | GCA_002197845.1 |
| OWK47329.1 | <-RelE-ParE<-?  ?-> LRR-repeats->  <-?  LRR-repeats+AP-GTPase+COR*->                                                                                                                         | LRR-repeats+AP-GTPase+COR                  | 967  | FRUB_01028  | Planctomycetes      | Fimbriiglobus ruber                                | putative internalin [Fimbriiglobus ruber].                                                      | GCA_002197845.1 |
| OYQ36252.1 | <-SIG+TM+TM+TM+HISKIN<-?<-?<-?  ?-> LRR-repeats+AP-GTPase+COR+TIR*-> ParA-Soj-PloopNTPase-> ParB->                                                                                           | LRR-repeats+AP-GTPase+COR+TIR              | 890  | CHU95_05565 | Alphaproteobacteria | Niveispirillum lacus                               | hypothetical protein CHU95_05565 [Niveispirillum lacus].                                        | GCA_002251795.1 |
| OYU93091.1 | LRR-repeats+AP-GTPase+COR+TM+TM*->                                                                                                                                                           | LRR-repeats+AP-GTPase+COR+TM+TM            | 1040 | CFE21_21825 | Bacteroidetes       | Bacteroidetes bacterium B1(2017)                   | hypothetical protein CFE21_21825, partial [Bacteroidetes bacterium B1(2017)].                   | GCA_002256395.1 |
| OYW76150.1 | LRR-repeats+AP-GTPase+COR+TIR*->?->  <-?<-WCAK  ?-> REC-> REC->                                                                                                                              | LRR-repeats+AP-GTPase+COR+TIR              | 996  | B7Z37_09950 | Verrucomicrobia     | Verrucomicrobia bacterium 12-59-8                  | hypothetical protein B7Z37_09950 [Verrucomicrobia bacterium 12-59-8].                           | GCA_002279765.1 |
| OYW77555.1 | SIG+ABhydrolase->?-> LRR-repeats+AP-GTPase+COR+TIR*->                                                                                                                                        | LRR-repeats+AP-GTPase+COR+TIR              | 939  | B7Z37_03775 | Verrucomicrobia     | Verrucomicrobia bacterium 12-59-8                  | hypothetical protein B7Z37_03775 [Verrucomicrobia bacterium 12-59-8].                           | GCA_002279765.1 |
| OYW78304.1 | FGS-> LRR-repeats+AP-GTPase+COR*->                                                                                                                                                           | LRR-repeats+AP-GTPase+COR                  | 1063 | B7Z37_00425 | Verrucomicrobia     | Verrucomicrobia bacterium 12-59-8                  | hypothetical protein B7Z37_00425 [Verrucomicrobia bacterium 12-59-8].                           | GCA_002279765.1 |
| PCI29610.1 | LRR-repeats+RNA-Helicase+AP-GTPase+COR+TIR*->?->  <-AraC-HTH  ?->?->  <-Cluster1048_2clades<-POLYSACPOLYMERASE                                                                               | LRR-repeats+RNA-Helicase+AP-GTPase+COR+TIR | 1264 | COB67_03805 | Deltaproteobacteria | SAR324 cluster bacterium                           | hypothetical protein COB67_03805 [SAR324 cluster bacterium].                                    | GCA_002401295.1 |
| PCK09719.1 | LRR-repeats+AP-GTPase+COR*->                                                                                                                                                                 | LRR-repeats+AP-GTPase+COR                  | 908  | COA42_02805 | Gammaproteobacteria | Alteromonadaceae bacterium                         | hypothetical protein COA42_02805 [Alteromonadaceae bacterium].                                  | GCA_002746115.1 |
| PHM06637.1 | LRR-repeats+AP-GTPase+COR+TM+TM*->                                                                                                                                                           | LRR-repeats+AP-GTPase+COR+TM+TM            | 817  | CK516_32280 | Cyanobacteria       | Nostoc sp. 'Peltigera malacea cyanobiont' DB3992   | GTPase [Nostoc sp. 'Peltigera malacea cyanobiont' DB3992].                                      | GCA_002631755.1 |
| PHS08569.1 | LRR-repeats+AP-GTPase+COR*-> SIG+TM+TM+TM+TM+TM+TM+TM+TM+TM+TM+TM->                                                                                                                          | LRR-repeats+AP-GTPase+COR                  | 924  | COA88_06290 | Bacteroidetes       | Kordia sp.                                         | GTP-binding protein [Kordia sp.].                                                               | GCA_002733415.1 |
| PID45108.1 | Cluster1540_2clades->?->?->?->?-> tRNA-> LRR-repeats+AP-GTPase+COR*->  <-?<-?  Cluster2057_2clades->                                                                                         | LRR-repeats+AP-GTPase+COR                  | 1016 | CSB47_10150 | Proteobacteria      | Proteobacteria bacterium                           | hypothetical protein CSB47_10150 [Proteobacteria bacterium].                                    | GCA_002747455.1 |
| PID49971.1 | SIG+TM+TM+TM+TM+TM+TM+TM+TM+TM+TM+TM->                                                                                                                                                       | LRR-repeats+AP-GTPase+COR+TIR              | 916  | CR991_03995 | Proteobacteria      | Proteobacteria bacterium                           | hypothetical protein CR991_03995 [Proteobacteria bacterium].                                    | GCA_002747435.1 |
| PID58617.1 | LRR-repeats+AP-GTPase+COR+TIR*->?->  <-?<-?<-?<-Cluster1063_3clades<-Cluster1067_3clades<-Cluster1581_2clades<-?  NUDIX-> LRR-repeats+AP-GTPase+COR*->                                       | LRR-repeats+AP-GTPase+COR                  | 1061 | CSB45_03475 | Bacteria            | candidate division KSB3 bacterium                  | GTPase [candidate division KSB3 bacterium].                                                     | GCA_002747525.1 |
| PIE10915.1 | LRR-repeats+AP-GTPase+COR*->  <-?<-tRNA  ?->?-> Cluster1995_2clades->                                                                                                                        | LRR-repeats+AP-GTPase+COR                  | 994  | CSA72_05310 | Alphaproteobacteria | Rhodobacterales bacterium                          | hypothetical protein CSA72_05310 [Rhodobacterales bacterium].                                   | GCA_002748265.1 |
| PJB68563.1 | <-XIS-HTH  HTH+HTH->  <-WLM  ?-> NACHT+68TM-wHTH-> REase->?-> LRR-repeats+AP-GTPase+COR*->                                                                                                   | LRR-repeats+AP-GTPase+COR                  | 947  | CO094_00645 | Chloroflexi         | Anaerolineae bacterium CG_4_9_14_3_um_filter_57_17 | hypothetical protein CO094_00645, partial [Anaerolineae bacterium CG_4_9_14_3_um_filter_57_17]. | GCA_002789715.1 |
| PJF39486.1 | LRR-repeats+AP-GTPase+COR+TM+TM*->                                                                                                                                                           | LRR-repeats+AP-GTPase+COR+TM+TM            | 751  | CUN54_08620 | Chloroflexi         | Candidatus Thermofonsia Clade 2 bacterium          | GTP-binding protein [Candidatus Thermofonsia Clade 2 bacterium].                                | GCA_002794595.1 |
| PKB73283.1 | LRR-repeats+AP-GTPase+COR*->  <-?<-?<-PSE<-SIG+ABhydrolase<-?<-ParA-Soj-PloopNTPase                                                                                                          | LRR-repeats+AP-GTPase+COR                  | 593  | BZY75_02725 | Chloroflexi         | SAR202 cluster bacterium Io17-Chloro-G7            | hypothetical protein BZY75_02725 [SAR202 cluster bacterium Io17-Chloro-G7].                     | GCA_002817055.1 |
| PKD18393.1 | LRR-repeats+AP-GTPase+COR*->                                                                                                                                                                 | LRR-repeats+AP-GTPase+COR                  | 845  | APR41_04380 | Bacteroidetes       | Salegentibacter salinarum                          | hypothetical protein APR41_04380 [Salegentibacter salinarum].                                   | GCA_002833365.1 |
| PKN92928.1 | UvsW-A18-> LRR-repeats+AP-GTPase+COR-> NACHT+68TM-wHTH-> LRR-repeats+AP-GTPase+COR-> LRR-repeats+AP-GTPase+COR+DUF4404->?->?-> Cluster1559_2clades->?->?->  <-?  LRR-repeats+AP-GTPase+COR-> | LRR-repeats+AP-GTPase+COR                  | 769  | CVU44_12925 | Chloroflexi         | Chloroflexi bacterium HGW-Chloroflexi-6            | GTP-binding protein [Chloroflexi bacterium HGW-Chloroflexi-6].                                  | GCA_002840685.1 |
| PKN92930.1 | LRR-repeats+AP-GTPase+COR*->                                                                                                                                                                 | LRR-repeats+AP-GTPase+COR                  | 1044 | CVU44_12935 | Chloroflexi         | Chloroflexi bacterium HGW-Chloroflexi-6            | hypothetical protein CVU44_12935 [Chloroflexi bacterium HGW-Chloroflexi-6].                     | GCA_002840685.1 |
| PKN92931.1 | LRR-repeats+AP-GTPase+COR+DUF4404*->                                                                                                                                                         | LRR-repeats+AP-GTPase+COR+DUF4404          | 812  | CVU44_12940 | Chloroflexi         | Chloroflexi bacterium HGW-Chloroflexi-6            | hypothetical protein CVU44_12940 [Chloroflexi bacterium HGW-Chloroflexi-6].                     | GCA_002840685.1 |
| PKN92938.1 | LRR-repeats+AP-GTPase+COR*->                                                                                                                                                                 | LRR-repeats+AP-GTPase+COR                  | 673  | CVU44_12975 | Chloroflexi         | Chloroflexi bacterium HGW-Chloroflexi-6            | GTP-binding protein [Chloroflexi bacterium HGW-Chloroflexi-6].                                  | GCA_002840685.1 |

| acc        | operon                                                                                                                                                                                 | architecture                                 | len  | gen.name       | taxend                | species                                         | define                                                                                  | gca             |
|------------|----------------------------------------------------------------------------------------------------------------------------------------------------------------------------------------|----------------------------------------------|------|----------------|-----------------------|-------------------------------------------------|-----------------------------------------------------------------------------------------|-----------------|
| PKP35889.1 | REC→ HISKIN→?→ LRR-repeats+AP-GTPase+COR*→                                                                                                                                             | LRR-repeats+AP-GTPase+COR                    | 654  | CVU00_00150    | Bacteroidetes         | Bacteroidetes bacterium<br>HGW-Bacteroidetes-17 | hypothetical protein CVU00_00150<br>[Bacteroidetes bacterium<br>HGW-Bacteroidetes-17].  | GCA_002840985.1 |
| PLX96646.1 | LRR-repeats+AP-GTPase+COR+DrHyd*→  <?  ?→?→?→  <?<?<?<SIG+PDZ                                                                                                                          | LRR-repeats+AP-GTPase+COR+DrHyd              | 1001 | C0622_14350    | Deltaproteobacteria   | Desulfuromonas sp.                              | hypothetical protein C0622_14350<br>[Desulfuromonas sp.].                               | GCA_002869665.1 |
| PLY10861.1 | LRR-repeats+AP-GTPase+COR*→  <?<trRNA<?<?  Cluster1398_2clades→ ABC-ATPase→                                                                                                            | LRR-repeats+AP-GTPase+COR                    | 1225 | C0626_04310    | Epsilonproteobacteria | Arcobacter sp.                                  | hypothetical protein C0626_04310<br>[Arcobacter sp.].                                   | GCA_002869535.1 |
| POZ53622.1 | REC→  <?<?<?<?  ?→ LRR-repeats+AP-GTPase+COR+DpnII-MboI-NTD+TIR*→                                                                                                                      | LRR-repeats+AP-GTPase+COR+DpnII-MboI-NTD+TIR | 1108 | AADEFJLK_00657 | Gammaproteobacteria   | Methylovulum<br>psychrotolerans                 | GTP-binding protein [Methylovulum<br>psychrotolerans].                                  | GCA_002923755.1 |
| PPT07796.1 | LRR-repeats+AP-GTPase+COR+BactIG*→                                                                                                                                                     | LRR-repeats+AP-GTPase+COR+BactIG             | 726  | CKA32_002768   | Cyanobacteria         | Geitlerinema sp. FC II                          | Leucine-rich repeat containing<br>protein [Geitlerinema sp. FC II].                     | GCA_002286845.1 |
| PRQ08092.1 | LRR-repeats+AP-GTPase+COR+PNPase*→                                                                                                                                                     | LRR-repeats+AP-GTPase+COR+PNPase             | 933  | mtnN           | Deltaproteobacteria   | Enhygromyxa salina                              | 5'-methylthioadenosine/S-<br>adenosylhomocysteine nucleosidase<br>[Enhygromyxa salina]. | GCA_002994635.1 |
| PSB34361.1 | <-REC  REC→  <?<?<?<TIR+TM+CHASE2+CHASE2+TM+TM+TM  PSE→ LRR-repeats+AP-GTPase+COR+TIR*→                                                                                                | LRR-repeats+AP-GTPase+COR+TIR                | 1113 | C7B82_02520    | Cyanobacteria         | Stenomitos frigidus ULC18                       | serine/threonine protein kinase<br>[Stenomitos frigidus ULC18].                         | GCA_003003795.1 |
| PSM30901.1 | LRR-repeats+AP-GTPase+COR*→                                                                                                                                                            | LRR-repeats+AP-GTPase+COR                    | 431  | BVG81_008130   | Deltaproteobacteria   | Haliangium sp. UPWRP_2                          | GTPase, partial [Haliangium sp.<br>UPWRP_2].                                            | GCA_002212765.2 |
| PTS96034.1 | LRR-repeats+AP-GTPase*→                                                                                                                                                                | LRR-repeats+AP-GTPase                        | 357  | DBR27_16615    | Bacteroidetes         | Flavobacterium sp.<br>HMWF030                   | hypothetical protein DBR27_16615,<br>partial [Flavobacterium sp.<br>HMWF030].           | GCA_003061345.1 |
| PWQ95663.1 | LRR-repeats+AP-GTPase+COR+TIR*→                                                                                                                                                        | LRR-repeats+AP-GTPase+COR+TIR                | 801  | DKT75_11555    | Gammaproteobacteria   | Leucothrix arctica                              | GTP-binding protein, partial<br>[Leucothrix arctica].                                   | GCA_003172895.1 |
| PXF61747.1 | LRR-repeats+AP-GTPase+COR*→                                                                                                                                                            | LRR-repeats+AP-GTPase+COR                    | 978  | C4B59_02515    | Euryarchaeota         | ANME-2 cluster archaeon                         | hypothetical protein C4B59_02515<br>[ANME-2 cluster archaeon].                          | GCA_003194445.1 |
| PXX81924.1 | <-ACET<?<?<?  ?→ HSP70→ DNAJ→ LRR-repeats+AP-GTPase+COR+TIR*→                                                                                                                          | LRR-repeats+AP-GTPase+COR+TIR                | 947  | DFR34_101153   | Betaproteobacteria    | Rivicola pingtungensis                          | internalin A [Rivicola pingtungensis].                                                  | GCA_003201855.1 |
| PYI92098.1 | LRR-repeats+AP-GTPase+COR+TIR*→                                                                                                                                                        | LRR-repeats+AP-GTPase+COR+TIR                | 882  | DME97_11675    | Verrucomicrobia       | Verrucomicrobia bacterium                       | hypothetical protein DME97_11675<br>[Verrucomicrobia bacterium].                        | GCA_003218375.1 |
| PYQ65591.1 | LRR-repeats+AP-GTPase+COR+TIR*→  <-START                                                                                                                                               | LRR-repeats+AP-GTPase+COR+TIR                | 985  | DMF53_05195    | Acidobacteria         | Acidobacteria bacterium                         | hypothetical protein DMF53_05195<br>[Acidobacteria bacterium].                          | GCA_003223675.1 |
| PZN70482.1 | LRR-repeats+AP-GTPase+COR*→ TIR→                                                                                                                                                       | LRR-repeats+AP-GTPase+COR                    | 479  | DM484_28490    | Gammaproteobacteria   | Candidatus<br>Methyloumidiphilus<br>alinensis   | hypothetical protein DM484_28490<br>[Candidatus Methyloumidiphilus<br>alinensis].       | GCA_003242955.1 |
| PZN77149.1 | LRR-repeats+AP-GTPase+COR+TIR*→                                                                                                                                                        | LRR-repeats+AP-GTPase+COR+TIR                | 1032 | DM484_15240    | Gammaproteobacteria   | Candidatus<br>Methyloumidiphilus<br>alinensis   | hypothetical protein DM484_15240<br>[Candidatus Methyloumidiphilus<br>alinensis].       | GCA_003242955.1 |
| PZN84233.1 | LRR-repeats+AP-GTPase+COR+TIR*→                                                                                                                                                        | LRR-repeats+AP-GTPase+COR+TIR                | 820  | DM484_03135    | Gammaproteobacteria   | Candidatus<br>Methyloumidiphilus<br>alinensis   | GTP-binding protein [Candidatus<br>Methyloumidiphilus alinensis].                       | GCA_003242955.1 |
| PZO19892.1 | <-SIG+TM+TM+TM  ?→?→?→ LRR-repeats+AP-GTPase+COR*→                                                                                                                                     | LRR-repeats+AP-GTPase+COR                    | 715  | DCF25_07770    | Cyanobacteria         | Leptolyngbya foveolarum                         | hypothetical protein DCF25_07770,<br>partial [Leptolyngbya foveolarum].                 | GCA_003242035.1 |
| PZO41190.1 | LRR-repeats+AP-GTPase+COR*→  <-PIN<-PSE  HISKIN→ REC→                                                                                                                                  | LRR-repeats+AP-GTPase+COR                    | 872  | DCF19_10445    | Cyanobacteria         | Pseudanabaena frigida                           | GTPase [Pseudanabaena frigida].                                                         | GCA_003242085.1 |
| PZO43272.1 | Cluster53_2clades→ Cluster53_2clades→?→ LRR-repeats+AP-GTPase+COR+CASPASE*→  <?<?  ?→?→<br>Cluster944_3clades→  <trRNA<-NUDIX  REC→                                                    | LRR-repeats+AP-GTPase+COR+CASPASE            | 1158 | DCF19_04785    | Cyanobacteria         | Pseudanabaena frigida                           | GTPase [Pseudanabaena frigida].                                                         | GCA_003242085.1 |
| PZO45083.1 | PAS+HISKIN→ REC→ HISKIN→  <?<?<?  LRR-repeats+AP-GTPase+COR*→  <?  ?→?→?→  <-ABC-ATPase                                                                                                | LRR-repeats+AP-GTPase+COR                    | 1026 | DCF19_00905    | Cyanobacteria         | Pseudanabaena frigida                           | hypothetical protein DCF19_00905<br>[Pseudanabaena frigida].                            | GCA_003242085.1 |
| PZS26024.1 | LRR-repeats+AP-GTPase*→                                                                                                                                                                | LRR-repeats+AP-GTPase                        | 304  | DLM61_19115    | Actinobacteria        | Pseudonocardiales<br>bacterium                  | hypothetical protein DLM61_19115<br>[Pseudonocardiales bacterium].                      | GCA_003244245.1 |
| PZU97949.1 | <-Cluster53_2clades  ?→ Cluster53_2clades→ Cluster54_3clades→?→ RelE-ParE→<br>LRR-repeats+AP-GTPase+COR+DUF4404*→?→?→  <-Cluster1583_2clades<-Cluster1881_2clades<-Cluster1340_2clades | LRR-repeats+AP-GTPase+COR+DUF4404            | 1125 | DCE90_05495    | Cyanobacteria         | Pseudanabaena sp.                               | Ras family protein [Pseudanabaena<br>sp.].                                              | GCA_003249015.1 |

| acc        | operon                                                                                                                                                           | architecture                      | len  | gen.name    | taxend              | species                                  | define                                                                    | gca             |
|------------|------------------------------------------------------------------------------------------------------------------------------------------------------------------|-----------------------------------|------|-------------|---------------------|------------------------------------------|---------------------------------------------------------------------------|-----------------|
| PZV15467.1 | Cluster53_2clades→?→ LRR-repeats+AP-GTPase+COR+TM+TM*→?→  <-?<-?<-ABC-ATPase<-?  PSE→?→ ABC_membrane+ABC_tran→                                                   | LRR-repeats+AP-GTPase+COR+TM+TM   | 966  | DCF20_10315 | Cyanobacteria       | Pseudanabaena sp.                        | GTP-binding protein [Pseudanabaena sp.].                                  | GCA_003249035.1 |
| PZV19789.1 | LRR-repeats+AP-GTPase+COR*→?→ Cluster2508_2clades→                                                                                                               | LRR-repeats+AP-GTPase+COR         | 779  | DCF21_06795 | Cyanobacteria       | Leptolyngbya sp.                         | GTP-binding protein [Leptolyngbya sp.].                                   | GCA_003249155.1 |
| PZV24423.1 | LRR-repeats+AP-GTPase+COR*→                                                                                                                                      | LRR-repeats+AP-GTPase+COR         | 522  | DCF12_17370 | Cyanobacteria       | Snowella sp.                             | hypothetical protein DCF12_17370 [Snowella sp.].                          | GCA_003249095.1 |
| PZV25744.1 | <-REC  ?→?→  <-?<-?  ?→ LRR-repeats+AP-GTPase+COR*→  <-DAGKIN  ?→ Cluster5_5clades→                                                                              | LRR-repeats+AP-GTPase+COR         | 860  | DCF12_13370 | Cyanobacteria       | Snowella sp.                             | GTP-binding protein [Snowella sp.].                                       | GCA_003249095.1 |
| PZV26136.1 | <-Cluster1004_3clades  Cluster1843_2clades→  <-?  Cluster5_5clades→  <-Cluster1306_2clades<-?<-?  LRR-repeats+AP-GTPase+COR*→                                    | LRR-repeats+AP-GTPase+COR         | 885  | DCF12_11170 | Cyanobacteria       | Snowella sp.                             | GTPase [Snowella sp.].                                                    | GCA_003249095.1 |
| PZW23552.1 | LRR-repeats→ LRR-repeats+AP-GTPase+COR*→                                                                                                                         | LRR-repeats+AP-GTPase+COR         | 813  | EI42_04935  | Chloroflexi         | Thermosporothrix hazakensis              | GTPase SAR1 family protein, partial [Thermosporothrix hazakensis].        | GCA_003253565.1 |
| QDV38731.1 | RelE-ParE→ WCAK→?→  <-Cluster2079_2clades  ?→?→?→ LRR-repeats+AP-GTPase+COR+DUF4404*→                                                                            | LRR-repeats+AP-GTPase+COR+DUF4404 | 887  | slrP        | Planctomycetes      | Tautonia plasticadhaerens                | E3 ubiquitin-protein ligase SlrP [Tautonia plasticadhaerens].             | GCA_007752535.1 |
| QEN02468.1 | HTH→?→?→ LRR-repeats+AP-GTPase+COR+TIR*→  <-?<-ABC_membrane+ABC_tran  Cyanophycinsyn-ATPgrasp→ Cyanophycinsyn-ATPgrasp→                                          | LRR-repeats+AP-GTPase+COR+TIR     | 1307 | EWH46_18040 | Betaproteobacteria  | Sphaerotilus natans subsp. sulfidivorans | TIR domain-containing protein [Sphaerotilus natans subsp. sulfidivorans]. | GCA_008329925.1 |
| QHA06431.1 | LRR-repeats+AP-GTPase+COR*→  <-?  ?→  <-?<-SIGMA-HTH<-?<-SIGMA-HTH                                                                                               | LRR-repeats+AP-GTPase+COR         | 1022 | GQF42_26905 | Actinobacteria      | Streptomyces broussonetiae               | GTPase [Streptomyces broussonetiae].                                      | GCA_009796285.1 |
| QKQ77944.1 | LRR-repeats+AP-GTPase+COR*→?→  <-?  ?→  <-?  ?→ ClpABN-AAA+ClpABC-AAA→  <-PSE<-SIG+TPR+TPR+TPR+TPR+TPR+TPR                                                       | LRR-repeats+AP-GTPase+COR         | 894  | FBB35_26070 | Cyanobacteria       | Nostoc sp. TCL240-02                     | GTPase [Nostoc sp. TCL240-02].                                            | GCA_013343235.1 |
| QLE48778.1 | ABhydrolase→?→  <-?  LRR-repeats+AP-GTPase+COR+TIR*→  <-PSE<-?  ?→  <-?<-SIG+NUDIX<-?<-?<-Cluster5_5clades                                                       | LRR-repeats+AP-GTPase+COR+TIR     | 1021 | FD724_12065 | Cyanobacteria       | Nostoc sp. C057                          | TIR domain-containing protein [Nostoc sp. C057].                          | GCA_013393925.1 |
| QLH39529.1 | Cluster850_2clades→?→?→ PRTase→  <-ENDO3+NUDIX<-?  LRR-repeats+AP-GTPase+COR+TIR*→                                                                               | LRR-repeats+AP-GTPase+COR+TIR     | 816  | HWD60_12020 | Alphaproteobacteria | Defluviicoccus sp.                       | leucine-rich repeat domain-containing protein [Defluviicoccus sp.].       | GCA_013414705.1 |
| RAM50807.1 | LRR-repeats+AP-GTPase+COR+TIR*→?→  <-SIG+TM+TM+TM+TM+TM+TM+TM+TM+TM+TM+TM+TM+TM                                                                                  | LRR-repeats+AP-GTPase+COR+TIR     | 849  | C6Y22_14980 | Cyanobacteria       | Hapalosiphonaceae cyanobacterium JJU2    | hypothetical protein C6Y22_14980 [Hapalosiphonaceae cyanobacterium JJU2]. | GCA_003261315.1 |
| RCJ18019.1 | <-Pkinase+Pentapeptide<-?<-?  ?→  <-?<-TIR+EAD9<-?  LRR-repeats+AP-GTPase+COR+TIR*→                                                                              | LRR-repeats+AP-GTPase+COR+TIR     | 986  | A6770_33290 | Cyanobacteria       | Nostoc minutum NIES-26                   | GTPase [Nostoc minutum NIES-26].                                          | GCA_003326215.1 |
| RCJ19389.1 | LRR-repeats+AP-GTPase+COR*→  <-ClpABN-AAA+ClpABC-AAA<-?  METHYLASE→                                                                                              | LRR-repeats+AP-GTPase+COR         | 907  | A6S26_26810 | Cyanobacteria       | Nostoc sp. ATCC 43529                    | GTPase [Nostoc sp. ATCC 43529].                                           | GCA_003326205.1 |
| RCJ25694.1 | <-Pkinase+Pentapeptide<-?<-?  ?→  <-?  LRR-repeats+AP-GTPase+COR+TIR*→  <-?<-?<-?  ?→  <-NUDIX                                                                   | LRR-repeats+AP-GTPase+COR+TIR     | 962  | A6S26_15250 | Cyanobacteria       | Nostoc sp. ATCC 43529                    | GTPase [Nostoc sp. ATCC 43529].                                           | GCA_003326205.1 |
| RCJ30096.1 | CR-REase5→ LRR-repeats+AP-GTPase+COR*→?→  <-?  ?→  <-?  ?→ ClpABN-AAA+ClpABC-AAA→                                                                                | LRR-repeats+AP-GTPase+COR         | 894  | A6770_21505 | Cyanobacteria       | Nostoc minutum NIES-26                   | GTPase [Nostoc minutum NIES-26].                                          | GCA_003326215.1 |
| RCJ30909.1 | Cyanophycinsyn-ATPgrasp→  <-Cluster833_2clades<-?  ?→  <-?<-Four-helical-protein<-?  LRR-repeats+AP-GTPase+COR+TIR*→  <-ncRNA<-?<-?<-?  ?→  <-?  ?→ Thioredoxin→ | LRR-repeats+AP-GTPase+COR+TIR     | 928  | A6770_20515 | Cyanobacteria       | Nostoc minutum NIES-26                   | hypothetical protein A6770_20515 [Nostoc minutum NIES-26].                | GCA_003326215.1 |
| RCJ31306.1 | METHYLASE→  <-Arginase<-?<-?  LRR-repeats+AP-GTPase+COR+TIR*→?→?→  <-?<-?  ?→ Pentapeptide-repeats→                                                              | LRR-repeats+AP-GTPase+COR+TIR     | 1103 | A6770_20105 | Cyanobacteria       | Nostoc minutum NIES-26                   | GTPase [Nostoc minutum NIES-26].                                          | GCA_003326215.1 |
| RCJ40793.1 | LRR-repeats+AP-GTPase+COR+TIR*→                                                                                                                                  | LRR-repeats+AP-GTPase+COR+TIR     | 1079 | A6770_10335 | Cyanobacteria       | Nostoc minutum NIES-26                   | GTPase [Nostoc minutum NIES-26].                                          | GCA_003326215.1 |
| RCJ41185.1 | <-TM  ?→  <-?  ?→  <-?  ?→ LRR-repeats+AP-GTPase+COR+TM+TM*→                                                                                                     | LRR-repeats+AP-GTPase+COR+TM+TM   | 837  | A6770_08860 | Cyanobacteria       | Nostoc minutum NIES-26                   | hypothetical protein A6770_08860 [Nostoc minutum NIES-26].                | GCA_003326215.1 |
| RCV66029.1 | LRR-repeats+AP-GTPase+COR→?→  <-?<-?  ?→  <-?<-?  LRR-repeats→ LRR-repeats+AP-GTPase+COR→                                                                        | LRR-repeats+AP-GTPase+COR         | 640  | C5S53_00730 | Euryarchaeota       | Methanophagales archaeon                 | GTPase SAR1 family protein [Methanophagales archaeon].                    | GCA_003336485.1 |
| RCV66037.1 | LRR-repeats+AP-GTPase+COR*→                                                                                                                                      | LRR-repeats+AP-GTPase+COR         | 730  | C5S53_00775 | Euryarchaeota       | Methanophagales archaeon                 | Leucine-rich repeat (LRR) protein [Methanophagales archaeon].             | GCA_003336485.1 |
| REJ39442.1 | SIG+TM+TM+TM+TM+TM+TM+TM+TM→  <-?  Mbetalac→ SAM-methylase→?→  <-?<-SIG+TPM_phosphatase+TM+TM+TM  PSE→                                                           | LRR-repeats+AP-GTPase+COR+TM+TM   | 898  | DWQ54_21980 | Cyanobacteria       | Microcystis flos-aquae TF09              | GTP-binding protein [Microcystis flos-aquae TF09].                        | GCA_003390815.1 |
| REJ48778.1 | SIG+TM+TM+TM+TM+TM+TM+TM+TM→  <-?  Mbetalac→ SAM-methylase→?→  <-?<-SIG+TPM_phosphatase+TM+TM+TM  PSE→                                                           | LRR-repeats+AP-GTPase+COR+TM+TM   | 852  | DWQ53_05035 | Cyanobacteria       | Microcystis flos-aquae DF17              | GTP-binding protein [Microcystis flos-aquae DF17].                        | GCA_003389435.1 |
| REJ60675.1 | SIG+TM+TM+TM+TM+TM+TM+TM+TM→  <-?  Mbetalac→ SAM-methylase→?→  <-?<-SIG+TPM_phosphatase+TM+TM+TM  PSE→                                                           | LRR-repeats+AP-GTPase+COR+TM+TM   | 826  | DWQ56_05670 | Cyanobacteria       | Microcystis aeruginosa DA14              | GTP-binding protein [Microcystis aeruginosa DA14].                        | GCA_003388675.1 |

| acc        | operon                                                                                               | architecture                      | len  | gen.name        | taxend              | species                              | define                                                                         | gca             |
|------------|------------------------------------------------------------------------------------------------------|-----------------------------------|------|-----------------|---------------------|--------------------------------------|--------------------------------------------------------------------------------|-----------------|
| RFP53135.1 | LRR-repeats+AP-GTPase+COR*→  <?  ?→  <-tRNA  ?→?→?→ Cluster1088_2clades→                             | LRR-repeats+AP-GTPase+COR         | 695  | BJG00_017645    | Cyanobacteria       | Limnothrix sp. CACIAM 69d            | hypothetical protein BJG00_017645 [Limnothrix sp. CACIAM 69d].                 | GCA_001913845.2 |
| RFP63081.1 | <-CR-REase5  LRR-repeats+AP-GTPase+COR*→ LRR-repeats→                                                | LRR-repeats+AP-GTPase+COR         | 886  | BJG00_001105    | Cyanobacteria       | Limnothrix sp. CACIAM 69d            | GTPase [Limnothrix sp. CACIAM 69d].                                            | GCA_001913845.2 |
| RIK29270.1 | LRR-repeats+AP-GTPase+COR*→  <-?<-?<-?<-Mbetalac<-?<-ABC-ATPase<-TM+TM+TM+TM+TM                      | LRR-repeats+AP-GTPase+COR         | 1096 | DCC56_13010     | Chloroflexi         | Anaerolineae bacterium               | hypothetical protein DCC56_13010 [Anaerolineae bacterium].                     | GCA_003577395.1 |
| RJO63533.1 | LRR-repeats+AP-GTPase+COR*→                                                                          | LRR-repeats+AP-GTPase+COR         | 1030 | C4523_20060     | Deltaproteobacteria | Myxococcales bacterium               | hypothetical protein C4523_20060 [Myxococcales bacterium].                     | GCA_003598065.1 |
| RJP51705.1 | TM+TM+TM+TM+TM+TM+TM+TM+TM→?→?→  <-?  ?→ Cluster1070_2clades→ REase→                                 | LRR-repeats+AP-GTPase+COR         | 984  | C4583_08075     | Chloroflexi         | Anaerolineaceae bacterium            | hypothetical protein C4583_08075 [Anaerolineaceae bacterium].                  | GCA_003598975.1 |
| RKS02636.1 | LRR-repeats+AP-GTPase+COR*→  <-?  ?→?→?→  <-Cluster1854_2clades<br>LRR-repeats+AP-GTPase+COR+TM+TM*→ | LRR-repeats+AP-GTPase+COR+TM+TM   | 1044 | C8C84_2360      | Bacteroidetes       | Flavobacterium sp. 102               | RocCOR-like putative regulator of kinase activity [Flavobacterium sp. 102].    | GCA_003634615.1 |
| RKZ87118.1 | LRR-repeats+AP-GTPase+COR*→ AP-GTPase+COR→ COR→                                                      | LRR-repeats+AP-GTPase+COR         | 159  | DRR19_14025     | Gammaproteobacteria | Gammaproteobacteria bacterium        | hypothetical protein DRR19_14025 [Gammaproteobacteria bacterium].              | GCA_003646175.1 |
| RKZ92191.1 | LRR-repeats+AP-GTPase+COR*→                                                                          | LRR-repeats+AP-GTPase+COR         | 778  | DRR19_04995     | Gammaproteobacteria | Gammaproteobacteria bacterium        | hypothetical protein DRR19_04995 [Gammaproteobacteria bacterium].              | GCA_003646175.1 |
| RLC02552.1 | LRR-repeats+AP-GTPase+COR*→                                                                          | LRR-repeats+AP-GTPase+COR         | 868  | DRI57_29970     | Deltaproteobacteria | Deltaproteobacteria bacterium        | hypothetical protein DRI57_29970, partial [Deltaproteobacteria bacterium].     | GCA_003647425.1 |
| RLC14341.1 | LRR-repeats+AP-GTPase+COR*→                                                                          | LRR-repeats+AP-GTPase+COR         | 442  | DRI57_14615     | Deltaproteobacteria | Deltaproteobacteria bacterium        | hypothetical protein DRI57_14615, partial [Deltaproteobacteria bacterium].     | GCA_003647425.1 |
| RLC16559.1 | LRR-repeats+AP-GTPase+COR*→                                                                          | LRR-repeats+AP-GTPase+COR         | 930  | DRI57_11050     | Deltaproteobacteria | Deltaproteobacteria bacterium        | hypothetical protein DRI57_11050 [Deltaproteobacteria bacterium].              | GCA_003647425.1 |
| RLD05606.1 | UvsW-A18→ LRR-repeats+AP-GTPase+COR+TIR*→                                                            | LRR-repeats+AP-GTPase+COR+TIR     | 759  | DRI32_03940     | Chloroflexi         | Chloroflexi bacterium                | GTP-binding protein [Chloroflexi bacterium].                                   | GCA_003648185.1 |
| RLS84177.1 | SIG+AP-GTPase+COR+TIR→ FGS+LRR-repeats+AP-GTPase+COR+TIR→                                            | SIG+AP-GTPase+COR+TIR             | 879  | DWI04_01885     | Planctomycetes      | Planctomycetes bacterium             | TIR domain-containing protein, partial [Planctomycetes bacterium].             | GCA_003669255.1 |
| RLS84178.1 | FGS+LRR-repeats+AP-GTPase+COR+TIR*→                                                                  | FGS+LRR-repeats+AP-GTPase+COR+TIR | 1292 | DWI04_01890     | Planctomycetes      | Planctomycetes bacterium             | hypothetical protein DWI04_01890, partial [Planctomycetes bacterium].          | GCA_003669255.1 |
| RME07294.1 | RVT→?→ LRR-repeats+AP-GTPase+COR*→                                                                   | LRR-repeats+AP-GTPase+COR         | 780  | D6816_06800     | Bacteroidetes       | Bacteroidetes bacterium              | hypothetical protein D6816_06800 [Bacteroidetes bacterium].                    | GCA_003694615.1 |
| RMG75718.1 | LRR-repeats+AP-GTPase+COR*→?→ FGS→                                                                   | LRR-repeats+AP-GTPase+COR         | 691  | D6722_00510     | Bacteroidetes       | Bacteroidetes bacterium              | hypothetical protein D6722_00510 [Bacteroidetes bacterium].                    | GCA_003696875.1 |
| RPH24755.1 | LRR-repeats+AP-GTPase+COR*→                                                                          | LRR-repeats+AP-GTPase+COR         | 627  | EHM93_20250     | Bacteroidetes       | Bacteroidales bacterium              | GTP-binding protein, partial [Bacteroidales bacterium].                        | GCA_003818205.1 |
| RPI17218.1 | LRR-repeats+AP-GTPase+COR*→                                                                          | LRR-repeats+AP-GTPase+COR         | 944  | EHM58_10175     | Ignavibacteriae     | Ignavibacteriae bacterium            | GTP-binding protein [Ignavibacteriae bacterium].                               | GCA_003820375.1 |
| RPJ19448.1 | LRR-repeats+AP-GTPase+COR*→                                                                          | LRR-repeats+AP-GTPase+COR         | 750  | EHM33_30260     | Chloroflexi         | Chloroflexi bacterium                | hypothetical protein EHM33_30260, partial [Chloroflexi bacterium].             | GCA_003820175.1 |
| RPJ72349.1 | LRR-repeats+AP-GTPase+COR*→                                                                          | LRR-repeats+AP-GTPase+COR         | 496  | EHM20_13865     | Alphaproteobacteria | Alphaproteobacteria bacterium        | GTP-binding protein, partial [Alphaproteobacteria bacterium].                  | GCA_003820255.1 |
| RQW02493.1 | LRR-repeats+AP-GTPase+COR+DrHyd*→?→?→ Cluster1207_2clades→?→ Cluster2271_2clades→                    | LRR-repeats+AP-GTPase+COR+DrHyd   | 763  | EH223_12385     | Bacteria            | candidate division KSB1 bacterium    | hypothetical protein EH223_12385, partial [candidate division KSB1 bacterium]. | GCA_003854975.1 |
| RUR83995.1 | <-Cluster5_5clades  LRR-repeats→ LRR-repeats+AP-GTPase+COR+DUF4404*→  <-?<-ABC-ATPase  ?→  <-REC     | LRR-repeats+AP-GTPase+COR+DUF4404 | 746  | DSM107007_30530 | Cyanobacteria       | Nostoc sp. PCC 7120 = FACHB-418      | hypothetical protein DSM107007_30530 [Nostoc sp. PCC 7120 = FACHB-418].        | GCA_003990585.1 |
| RWX44973.1 | <-Cluster1731_2clades<-?<-?  ?→?→ LRR-repeats+AP-GTPase+COR*→?→?→  <-Cluster1409_2clades             | LRR-repeats+AP-GTPase+COR         | 648  | H206_01140      | Deltaproteobacteria | Candidatus Electrothrix aarhusiensis | hypothetical protein H206_01140 [Candidatus Electrothrix aarhusiensis].        | GCA_004028505.1 |

| acc        | operon                                                                                                                                  | architecture                       | len  | gen.name            | taxend              | species                              | define                                                                           | gca             |
|------------|-----------------------------------------------------------------------------------------------------------------------------------------|------------------------------------|------|---------------------|---------------------|--------------------------------------|----------------------------------------------------------------------------------|-----------------|
| RWX45664.1 | <-S18-HTH<-Cluster1004_3clades<-Cluster2139_2clades<-?<-?<-?  ?→ LRR-repeats+AP-GTPase+COR*→                                            | LRR-repeats+AP-GTPase+COR          | 605  | H206_01449          | Deltaproteobacteria | Candidatus Electrothrix aarhusiensis | hypothetical protein H206_01449 [Candidatus Electrothrix aarhusiensis].          | GCA_004028505.1 |
| RWX46469.1 | Aminotran_1_2→  <-ABC-ATPase<-?<-?<-?<-?  LRR-repeats+AP-GTPase+COR*→                                                                   | LRR-repeats+AP-GTPase+COR          | 908  | H206_00859          | Deltaproteobacteria | Candidatus Electrothrix aarhusiensis | internalin A [Candidatus Electrothrix aarhusiensis].                             | GCA_004028505.1 |
| RWX47043.1 | LRR-repeats+AP-GTPase+COR+TM+TM+TM*→ WCAK→                                                                                              | LRR-repeats+AP-GTPase+COR+TM+TM+TM | 873  | H206_03377          | Deltaproteobacteria | Candidatus Electrothrix aarhusiensis | Ras of Complex, Roc, domain of DAPkinase [Candidatus Electrothrix aarhusiensis]. | GCA_004028505.1 |
| RWX51844.1 | LRR-repeats+AP-GTPase+COR*→                                                                                                             | LRR-repeats+AP-GTPase+COR          | 785  | VU01_10733          | Deltaproteobacteria | Candidatus Electrothrix marina       | hypothetical protein VU01_10733 [Candidatus Electrothrix marina].                | GCA_004028495.1 |
| RYD26380.1 | LRR-repeats+AP-GTPase+COR*→                                                                                                             | LRR-repeats+AP-GTPase+COR          | 442  | EOP86_26045         | Verrucomicrobia     | Verrucomicrobiaceae bacterium        | hypothetical protein EOP86_26045, partial [Verrucomicrobiaceae bacterium].       | GCA_004143925.1 |
| RYD41313.1 | LRR-repeats+AP-GTPase+COR*→                                                                                                             | LRR-repeats+AP-GTPase+COR          | 546  | EOP85_12890         | Verrucomicrobia     | Verrucomicrobiaceae bacterium        | hypothetical protein EOP85_12890, partial [Verrucomicrobiaceae bacterium].       | GCA_004144085.1 |
| RYD45970.1 | LRR-repeats+AP-GTPase*→                                                                                                                 | LRR-repeats+AP-GTPase              | 529  | EOP85_08340         | Verrucomicrobia     | Verrucomicrobiaceae bacterium        | hypothetical protein EOP85_08340, partial [Verrucomicrobiaceae bacterium].       | GCA_004144085.1 |
| RYD85024.1 | LRR-repeats+AP-GTPase+COR+TIR*→                                                                                                         | LRR-repeats+AP-GTPase+COR+TIR      | 722  | EOP84_03815         | Verrucomicrobia     | Verrucomicrobiaceae bacterium        | TIR domain-containing protein, partial [Verrucomicrobiaceae bacterium].          | GCA_004144095.1 |
| RYE22211.1 | LRR-repeats+AP-GTPase+COR*→                                                                                                             | LRR-repeats+AP-GTPase+COR          | 770  | EOP45_08535         | Bacteroidetes       | Sphingobacteriaceae bacterium        | GTPase, partial [Sphingobacteriaceae bacterium].                                 | GCA_004144285.1 |
| RYE59584.1 | LRR-repeats+AP-GTPase+COR+TIR*→                                                                                                         | LRR-repeats+AP-GTPase+COR+TIR      | 1318 | EOP48_00430         | Bacteroidetes       | Sphingobacteriales bacterium         | TIR domain-containing protein [Sphingobacteriales bacterium].                    | GCA_004144425.1 |
| RYF36188.1 | LRR-repeats+AP-GTPase*→                                                                                                                 | LRR-repeats+AP-GTPase              | 370  | EOO38_28030         | Bacteroidetes       | Cytophagaceae bacterium              | hypothetical protein EOO38_28030, partial [Cytophagaceae bacterium].             | GCA_004145185.1 |
| RYY12294.1 | LRR-repeats+AP-GTPase*→                                                                                                                 | LRR-repeats+AP-GTPase              | 540  | EOO04_33805         | Bacteroidetes       | Chitinophagaceae bacterium           | hypothetical protein EOO04_33805, partial [Chitinophagaceae bacterium].          | GCA_004172945.1 |
| RYZ86256.1 | LRR-repeats→ AP-GTPase+COR*→                                                                                                            | AP-GTPase+COR                      | 573  | EOP04_14245         | Proteobacteria      | Proteobacteria bacterium             | hypothetical protein EOP04_14245, partial [Proteobacteria bacterium].            | GCA_004193275.1 |
| RZK07337.1 | LRR-repeats+AP-GTPase*→                                                                                                                 | LRR-repeats+AP-GTPase              | 262  | EOO43_21605         | Bacteroidetes       | Flavobacterium sp.                   | hypothetical protein EOO43_21605, partial [Flavobacterium sp.].                  | GCA_004211555.1 |
| RZK10466.1 | LRR-repeats+AP-GTPase+COR*→                                                                                                             | LRR-repeats+AP-GTPase+COR          | 421  | EOO43_20245         | Bacteroidetes       | Flavobacterium sp.                   | hypothetical protein EOO43_20245, partial [Flavobacterium sp.].                  | GCA_004211555.1 |
| RZN33809.1 | pc1599→ Cluster1746_2clades→?→?→ Calcineurin→  <-tRNA  LRR-repeats+AP-GTPase+COR+TM+TM*→?→ Aminotran_1_2→  <-?<-?  Cluster1483_2clades→ | LRR-repeats+AP-GTPase+COR+TM+TM    | 832  | EF813_10660         | Euryarchaeota       | Methanosarcinales archaeon           | GTP-binding protein [Methanosarcinales archaeon].                                | GCA_004211975.1 |
| SCD37814.1 | LRR-repeats+AP-GTPase+COR*→  <-NUDIX                                                                                                    | LRR-repeats+AP-GTPase+COR          | 1358 | GA0115243_1012136   | Actinobacteria      | Streptomyces sp. ScaeMP-e83          | Leucine-rich repeat (LRR) protein, partial [Streptomyces sp. ScaeMP-e83].        | GCA_900091775.1 |
| SDD54826.1 | Mbetalac→?→ LRR-repeats+AP-GTPase+COR*→  <-?<-ICLR-HTH  ?→?→?→ ABhydrolase→                                                             | LRR-repeats+AP-GTPase+COR          | 887  | SAMN05660690_4513   | Actinobacteria      | Geodermatophilus telluris            | Leucine rich repeat-containing protein [Geodermatophilus telluris].              | GCA_900102745.1 |
| SEA38734.1 | LRR-repeats+AP-GTPase+COR+TIR*→?→?→  <-Thioredoxin  YBAK→                                                                               | LRR-repeats+AP-GTPase+COR+TIR      | 849  | SAMN05660964_01466  | Gammaproteobacteria | Thiothrix caldifontis                | Leucine Rich repeat-containing protein [Thiothrix caldifontis].                  | GCA_900107695.1 |
| SEM73063.1 | <-ABC-ATPase<-?  ?→?→  <-?  LRR-repeats+AP-GTPase+COR*→?→?→?→  <-?<-?<-SIR2                                                             | LRR-repeats+AP-GTPase+COR          | 717  | SAMN05660976_05948  | Actinobacteria      | Nonomuraea pusilla                   | GTPase SAR1 family protein [Nonomuraea pusilla].                                 | GCA_900109355.1 |
| SFG01605.1 | LRR-repeats+AP-GTPase+COR+TIR*→                                                                                                         | LRR-repeats+AP-GTPase+COR+TIR      | 812  | SAMN05216175_102423 | Gammaproteobacteria | Neptunomonas qingdaonensis           | internalin A, partial [Neptunomonas qingdaonensis].                              | GCA_900113275.1 |

| acc        | operon                                                                                              | architecture                      | len  | gen.name             | taxend              | species                        | define                                                                        | gca             |
|------------|-----------------------------------------------------------------------------------------------------|-----------------------------------|------|----------------------|---------------------|--------------------------------|-------------------------------------------------------------------------------|-----------------|
| SFL80318.1 | LRR-repeats+AP-GTPase+COR+DrHyd*→?→?→?→?→  <-?<-SIG+TM+TM+TM+TM                                     | LRR-repeats+AP-GTPase+COR+DrHyd   | 738  | SAMN05421863_1004142 | Betaproteobacteria  | Nitrosomonas communis          | Ras of Complex, Roc, domain of DAPkinase [Nitrosomonas communis].             | GCA_900114745.1 |
| SHH94122.1 | LRR-repeats+AP-GTPase+COR+TIR*→                                                                     | LRR-repeats+AP-GTPase+COR+TIR     | 756  | VA7868_00952         | Gammaproteobacteria | Vibrio aerogenes CECT 7868     | Ras family protein [Vibrio aerogenes CECT 7868].                              | GCA_900130105.1 |
| SHI24236.1 | LRR-repeats+AP-GTPase+COR+TIR*→                                                                     | LRR-repeats+AP-GTPase+COR+TIR     | 954  | inlA                 | Gammaproteobacteria | Vibrio aerogenes CECT 7868     | Internalin-A precursor [Vibrio aerogenes CECT 7868].                          | GCA_900130105.1 |
| SKA94563.1 | METHYLASE→?→  <-?  SIG+Trypsin+PDZ→?→ Cluster978_2clades→ LRR-repeats+AP-GTPase+COR+TIR*→?→?→ GDSL→ | LRR-repeats+AP-GTPase+COR+TIR     | 1235 | SAMN02745166_02182   | Verrucomicrobia     | Prostheco bacter debontii      | Leucine-rich repeat (LRR) protein [Prostheco bacter debontii].                | GCA_900167535.1 |
| SKC31468.1 | CI→ CI→?→ LRR-repeats+AP-GTPase+COR*→                                                               | LRR-repeats+AP-GTPase+COR         | 1108 | CZ809_00946          | Gammaproteobacteria | Photobacterium piscicola       | Ras family protein [Photobacterium piscicola].                                | GCA_900166965.1 |
| SMS01989.1 | LRR-repeats+AP-GTPase+COR+TIR*→                                                                     | LRR-repeats+AP-GTPase+COR+TIR     | 1190 | inlA                 | Gammaproteobacteria | Vibrio mangrovi                | Internalin-A precursor [Vibrio mangrovi].                                     | GCA_900184095.1 |
| SNS86340.1 | SIG+Concanavalin-like+SUN→ LRR-repeats+AP-GTPase+COR*→?→?→?→  <-?<-ABC-ATPase                       | LRR-repeats+AP-GTPase+COR         | 686  | SAMN06264365_12694   | Actinobacteria      | Actinoplanes regularis         | hypothetical protein SAMN06264365_12694 [Actinoplanes regularis].             | GCA_900188005.1 |
| SUS04594.1 | LRR-repeats+AP-GTPase+COR+TIR*→                                                                     | LRR-repeats+AP-GTPase+COR+TIR     | 965  | DF3PB_1340002        | Alphaproteobacteria | uncultured Defluviococcus sp.  | Leucine-rich repeat (LRR) protein (fragment) [uncultured Defluviococcus sp.]. | GCA_900498315.1 |
| SUS07166.1 | LRR-repeats+AP-GTPase+COR+TIR*→                                                                     | LRR-repeats+AP-GTPase+COR+TIR     | 1031 | DF3PB_390011         | Alphaproteobacteria | uncultured Defluviococcus sp.  | conserved hypothetical protein [uncultured Defluviococcus sp.].               | GCA_900498315.1 |
| TAA73809.1 | <-Cluster1510_2clades<-?<-?  LRR-repeats+AP-GTPase+COR→ LRR-repeats+AP-GTPase+COR→                  | LRR-repeats+AP-GTPase+COR         | 571  | CDV28_1587           | Deltaproteobacteria | Candidatus Electronema sp. GS  | hypothetical protein CDV28_1587 [Candidatus Electronema sp. GS].              | GCA_004284765.1 |
| TAA73810.1 | LRR-repeats+AP-GTPase+COR*→                                                                         | LRR-repeats+AP-GTPase+COR         | 678  | CDV28_1588           | Deltaproteobacteria | Candidatus Electronema sp. GS  | hypothetical protein CDV28_1588 [Candidatus Electronema sp. GS].              | GCA_004284765.1 |
| TAA74005.1 | LRR-repeats+AP-GTPase+COR*→ SIG+TM+TM+TM+TM→                                                        | LRR-repeats+AP-GTPase+COR         | 803  | CDV28_14413          | Deltaproteobacteria | Candidatus Electronema sp. GS  | hypothetical protein CDV28_14413 [Candidatus Electronema sp. GS].             | GCA_004284765.1 |
| TAA74213.1 | Cluster1147_2clades→?→ LRR-repeats+AP-GTPase+COR*→                                                  | LRR-repeats+AP-GTPase+COR         | 680  | CDV28_13522          | Deltaproteobacteria | Candidatus Electronema sp. GS  | hypothetical protein CDV28_13522 [Candidatus Electronema sp. GS].             | GCA_004284765.1 |
| TAA75585.1 | Cluster2427_2clades→?→ Cluster1969_2clades→ Thioredoxin→?→?→?→ LRR-repeats+AP-GTPase+COR*→          | LRR-repeats+AP-GTPase+COR         | 694  | CDV28_10542          | Deltaproteobacteria | Candidatus Electronema sp. GS  | hypothetical protein CDV28_10542 [Candidatus Electronema sp. GS].             | GCA_004284765.1 |
| TAA76176.1 | <-SIG+HSP70<-?<-?<-?<-?  LRR-repeats+AP-GTPase+COR*→  <-?<-?<-?<-?<-RelE-ParE                       | LRR-repeats+AP-GTPase+COR         | 627  | CDV28_10174          | Deltaproteobacteria | Candidatus Electronema sp. GS  | hypothetical protein CDV28_10174 [Candidatus Electronema sp. GS].             | GCA_004284765.1 |
| TAD75245.1 | RelE-ParE→ LRR-repeats+AP-GTPase+COR*→                                                              | LRR-repeats+AP-GTPase+COR         | 952  | EA001_14520          | Cyanobacteria       | Oscillatoriales cyanobacterium | GTPase [Oscillatoriales cyanobacterium].                                      | GCA_004292515.1 |
| TAD78959.1 | HISKIN→?→ LRR-repeats+AP-GTPase+COR*→  <-Cluster971_2clades                                         | LRR-repeats+AP-GTPase+COR         | 1063 | EA001_05550          | Cyanobacteria       | Oscillatoriales cyanobacterium | GTPase [Oscillatoriales cyanobacterium].                                      | GCA_004292515.1 |
| TAE00317.1 | <-Cluster1805_2clades  ?→?→ LRR-repeats+AP-GTPase+COR*→                                             | LRR-repeats+AP-GTPase+COR         | 631  | EAZ97_06315          | Bacteroidetes       | Bacteroidetes bacterium        | hypothetical protein EAZ97_06315 [Bacteroidetes bacterium].                   | GCA_004292785.1 |
| TAE06670.1 | LRR-repeats→ LRR-repeats+AP-GTPase+COR+DUF4404*→?→?→  <-Pentapeptide-repeats                        | LRR-repeats+AP-GTPase+COR+DUF4404 | 900  | EAZ94_30300          | Cyanobacteria       | Oscillatoriales cyanobacterium | GTPase [Oscillatoriales cyanobacterium].                                      | GCA_004292775.1 |
| TAE07007.1 | LRR-repeats+AP-GTPase+COR*→                                                                         | LRR-repeats+AP-GTPase+COR         | 808  | EAZ95_18790          | Bacteroidetes       | Bacteroidetes bacterium        | GTP-binding protein [Bacteroidetes bacterium].                                | GCA_004292795.1 |
| TAE07511.1 | LRR-repeats+AP-GTPase+COR*→                                                                         | LRR-repeats+AP-GTPase+COR         | 774  | EAZ95_18335          | Bacteroidetes       | Bacteroidetes bacterium        | hypothetical protein EAZ95_18335 [Bacteroidetes bacterium].                   | GCA_004292795.1 |
| TAE08557.1 | LRR-repeats+AP-GTPase+COR*→                                                                         | LRR-repeats+AP-GTPase+COR         | 487  | EAZ95_17095          | Bacteroidetes       | Bacteroidetes bacterium        | hypothetical protein EAZ95_17095, partial [Bacteroidetes bacterium].          | GCA_004292795.1 |
| TAE08925.1 | LRR-repeats+AP-GTPase+COR*→                                                                         | LRR-repeats+AP-GTPase+COR         | 911  | EAZ94_23755          | Cyanobacteria       | Oscillatoriales cyanobacterium | hypothetical protein EAZ94_23755 [Oscillatoriales cyanobacterium].            | GCA_004292775.1 |
| TAE12199.1 | LRR-repeats+AP-GTPase+COR*→ SIG+TM+TM+TM+TM+TM→ REase→                                              | LRR-repeats+AP-GTPase+COR         | 811  | EAZ95_12720          | Bacteroidetes       | Bacteroidetes bacterium        | hypothetical protein EAZ95_12720, partial [Bacteroidetes bacterium].          | GCA_004292795.1 |

| acc        | operon                                                                                                                  | architecture                      | len  | gen.name    | taxend        | species                        | define                                                                      | gca             |
|------------|-------------------------------------------------------------------------------------------------------------------------|-----------------------------------|------|-------------|---------------|--------------------------------|-----------------------------------------------------------------------------|-----------------|
| TAE14819.1 | <-Pkinase+TM  ?→ PIN→ LRR-repeats+AP-GTPase+COR*→                                                                       | LRR-repeats+AP-GTPase+COR         | 769  | EAZ95_09495 | Bacteroidetes | Bacteroidetes bacterium        | GTP-binding protein [Bacteroidetes bacterium].                              | GCA_004292795.1 |
| TAE15606.1 | LRR-repeats+AP-GTPase+COR*→                                                                                             | LRR-repeats+AP-GTPase+COR         | 866  | EAZ95_08545 | Bacteroidetes | Bacteroidetes bacterium        | GTP-binding protein [Bacteroidetes bacterium].                              | GCA_004292795.1 |
| TAE15646.1 | <-CR-REase5<-?<-?  LRR-repeats→?→ PSE→ LRR-repeats+AP-GTPase+COR*→?→?→?→  <-?<-PSE<-?  Pentapeptide-repeats→            | LRR-repeats+AP-GTPase+COR         | 1106 | EAZ94_03785 | Cyanobacteria | Oscillatoriales cyanobacterium | GTP-binding protein [Oscillatoriales cyanobacterium].                       | GCA_004292775.1 |
| TAE18080.1 | <-ABC_membrane+ABC_tran  ?→?→ LRR-repeats+AP-GTPase+COR*→                                                               | LRR-repeats+AP-GTPase+COR         | 778  | EAZ95_05200 | Bacteroidetes | Bacteroidetes bacterium        | hypothetical protein EAZ95_05200 [Bacteroidetes bacterium].                 | GCA_004292795.1 |
| TAE30098.1 | LRR-repeats→ LRR-repeats+AP-GTPase+COR+DUF4404*→?→?→  <-Pentapeptide-repeats                                            | LRR-repeats+AP-GTPase+COR+DUF4404 | 1078 | EAZ93_01305 | Cyanobacteria | Oscillatoriales cyanobacterium | GTPase [Oscillatoriales cyanobacterium].                                    | GCA_004292845.1 |
| TAE37012.1 | LRR-repeats+AP-GTPase+COR+DUF4404*→?→?→  <-Pentapeptide-repeats                                                         | LRR-repeats+AP-GTPase+COR+DUF4404 | 1282 | EAZ90_27320 | Cyanobacteria | Oscillatoriales cyanobacterium | GTPase [Oscillatoriales cyanobacterium].                                    | GCA_004292895.1 |
| TAE38303.1 | LRR-repeats+AP-GTPase+COR*→?→?→ PSE→?→ PSE→?→  <-?<-PSE<-?  Pentapeptide-repeats→                                       | LRR-repeats+AP-GTPase+COR         | 909  | EAZ90_25170 | Cyanobacteria | Oscillatoriales cyanobacterium | GTP-binding protein [Oscillatoriales cyanobacterium].                       | GCA_004292895.1 |
| TAE48904.1 | LRR-repeats→?→?→?→ LRR-repeats+AP-GTPase+COR*→                                                                          | LRR-repeats+AP-GTPase+COR         | 695  | EAZ88_23370 | Cyanobacteria | Oscillatoriales cyanobacterium | GTP-binding protein, partial [Oscillatoriales cyanobacterium].              | GCA_004292945.1 |
| TAE51174.1 | LRR-repeats+AP-GTPase+COR*→                                                                                             | LRR-repeats+AP-GTPase+COR         | 790  | EAZ89_10570 | Bacteroidetes | Bacteroidetes bacterium        | hypothetical protein EAZ89_10570, partial [Bacteroidetes bacterium].        | GCA_004292985.1 |
| TAE53250.1 | LRR-repeats+AP-GTPase+COR*→                                                                                             | LRR-repeats+AP-GTPase+COR         | 912  | EAZ88_12540 | Cyanobacteria | Oscillatoriales cyanobacterium | hypothetical protein EAZ88_12540 [Oscillatoriales cyanobacterium].          | GCA_004292945.1 |
| TAE59343.1 | LRR-repeats+AP-GTPase+COR+EAD11*→                                                                                       | LRR-repeats+AP-GTPase+COR+EAD11   | 737  | EAZ89_02575 | Bacteroidetes | Bacteroidetes bacterium        | hypothetical protein EAZ89_02575 [Bacteroidetes bacterium].                 | GCA_004292985.1 |
| TAE66346.1 | LRR-repeats+AP-GTPase+COR*→                                                                                             | LRR-repeats+AP-GTPase+COR         | 742  | EAZ85_15975 | Bacteroidetes | Bacteroidetes bacterium        | GTP-binding protein, partial [Bacteroidetes bacterium].                     | GCA_004293265.1 |
| TAE67608.1 | LRR-repeats+AP-GTPase+COR*→                                                                                             | LRR-repeats+AP-GTPase+COR         | 911  | EAZ86_16170 | Cyanobacteria | Oscillatoriales cyanobacterium | hypothetical protein EAZ86_16170 [Oscillatoriales cyanobacterium].          | GCA_004292955.1 |
| TAE67866.1 | FGS→?→ LRR-repeats+AP-GTPase+COR*→                                                                                      | LRR-repeats+AP-GTPase+COR         | 987  | EAZ85_14755 | Bacteroidetes | Bacteroidetes bacterium        | hypothetical protein EAZ85_14755 [Bacteroidetes bacterium].                 | GCA_004293265.1 |
| TAE68409.1 | <-CR-REase5<-?<-?  ?→  <-?  LRR-repeats→?→?→ LRR-repeats+AP-GTPase+COR*→?→?→?→ PSE→  <-?<-PSE<-?  Pentapeptide-repeats→ | LRR-repeats+AP-GTPase+COR         | 1061 | EAZ86_13565 | Cyanobacteria | Oscillatoriales cyanobacterium | GTP-binding protein [Oscillatoriales cyanobacterium].                       | GCA_004292955.1 |
| TAE73426.1 | LRR-repeats+AP-GTPase+COR*→                                                                                             | LRR-repeats+AP-GTPase+COR         | 1078 | EAZ85_07065 | Bacteroidetes | Bacteroidetes bacterium        | hypothetical protein EAZ85_07065 [Bacteroidetes bacterium].                 | GCA_004293265.1 |
| TAE76344.1 | LRR-repeats+AP-GTPase+COR*→  <-Cluster1921_2clades                                                                      | LRR-repeats+AP-GTPase+COR         | 919  | EAZ85_00290 | Bacteroidetes | Bacteroidetes bacterium        | hypothetical protein EAZ85_00290 [Bacteroidetes bacterium].                 | GCA_004293265.1 |
| TAE86412.1 | LRR-repeats+AP-GTPase+COR+TIR*→  <-?<-Cluster409_3clades                                                                | LRR-repeats+AP-GTPase+COR+TIR     | 1151 | EAY81_05595 | Bacteroidetes | Bacteroidetes bacterium        | TIR domain-containing protein [Bacteroidetes bacterium].                    | GCA_004293295.1 |
| TAF49891.1 | LRR-repeats+AP-GTPase+COR+DUF4404*→                                                                                     | LRR-repeats+AP-GTPase+COR+DUF4404 | 845  | EAZ61_13785 | Cyanobacteria | Oscillatoriales cyanobacterium | GTPase, partial [Oscillatoriales cyanobacterium].                           | GCA_004293855.1 |
| TAF64535.1 | LRR-repeats+AP-GTPase+COR+EAD11*→                                                                                       | LRR-repeats+AP-GTPase+COR+EAD11   | 1108 | EAZ55_10760 | Bacteroidetes | Cytophagales bacterium         | hypothetical protein EAZ55_10760 [Cytophagales bacterium].                  | GCA_004293905.1 |
| TAF89999.1 | GTPase-AIG→?→?→  <-?<-?  LRR-repeats+AP-GTPase+COR+DUF4404*→?→?→  <-Pentapeptide-repeats                                | LRR-repeats+AP-GTPase+COR+DUF4404 | 1282 | EAZ49_10560 | Cyanobacteria | Oscillatoriales cyanobacterium | GTPase [Oscillatoriales cyanobacterium].                                    | GCA_004294035.1 |
| TAF91931.1 | <-CR-REase5<-?<-?  LRR-repeats→?→?→ LRR-repeats+AP-GTPase+COR*→?→?→?→ PSE→  <-?<-PSE<-?  Pentapeptide-repeats→          | LRR-repeats+AP-GTPase+COR         | 952  | EAZ49_03665 | Cyanobacteria | Oscillatoriales cyanobacterium | GTP-binding protein [Oscillatoriales cyanobacterium].                       | GCA_004294035.1 |
| TAG07081.1 | RVT→?→ LRR-repeats+AP-GTPase+COR+ACYC*→?→  <-?<-?<-HISKIN                                                               | LRR-repeats+AP-GTPase+COR+ACYC    | 962  | EAZ44_01180 | Bacteroidetes | Cytophagia bacterium           | hypothetical protein EAZ44_01180 [Cytophagia bacterium].                    | GCA_004294005.1 |
| TAG17458.1 | <-CENPB  ?→?→  <-?<-?  Aminotran_1_2→ LRR-repeats+AP-GTPase+COR*→                                                       | LRR-repeats+AP-GTPase+COR         | 975  | EAZ38_17395 | Bacteroidetes | Cytophagales bacterium         | hypothetical protein EAZ38_17395 [Cytophagales bacterium].                  | GCA_004293585.1 |
| TAG62903.1 | LRR-repeats+AP-GTPase+COR*→                                                                                             | LRR-repeats+AP-GTPase+COR         | 778  | EAZ28_01955 | Cyanobacteria | Oscillatoriales cyanobacterium | hypothetical protein EAZ28_01955, partial [Oscillatoriales cyanobacterium]. | GCA_004294275.1 |

| acc        | operon                                                                                                                                         | architecture                    | len  | gen.name    | taxend              | species                                    | define                                                                         | gca             |
|------------|------------------------------------------------------------------------------------------------------------------------------------------------|---------------------------------|------|-------------|---------------------|--------------------------------------------|--------------------------------------------------------------------------------|-----------------|
| TAG65048.1 | LRR-repeats→?→ PSE→ LRR-repeats+AP-GTPase+COR*→ PSE→?→?→ PSE→  <-?<-PSE<-?  Pentapeptide-repeats→                                              | LRR-repeats+AP-GTPase+COR       | 939  | EAZ25_17645 | Cyanobacteria       | Oscillatoriales cyanobacterium             | GTP-binding protein [Oscillatoriales cyanobacterium].                          | GCA_004294345.1 |
| TAG86009.1 | LRR-repeats+AP-GTPase+COR*→                                                                                                                    | LRR-repeats+AP-GTPase+COR       | 565  | EAZ18_26350 | Cyanobacteria       | Oscillatoriales cyanobacterium             | GTP-binding protein, partial [Oscillatoriales cyanobacterium].                 | GCA_004294385.1 |
| TAG86671.1 | LRR-repeats+AP-GTPase+COR*→                                                                                                                    | LRR-repeats+AP-GTPase+COR       | 892  | EAZ20_12320 | Bacteroidetes       | Bacteroidetes bacterium                    | hypothetical protein EAZ20_12320, partial [Bacteroidetes bacterium].           | GCA_004294185.1 |
| TAG91526.1 | FGS→?→ LRR-repeats+AP-GTPase*→                                                                                                                 | LRR-repeats+AP-GTPase           | 279  | EAZ20_03245 | Bacteroidetes       | Bacteroidetes bacterium                    | hypothetical protein EAZ20_03245, partial [Bacteroidetes bacterium].           | GCA_004294185.1 |
| TAG93154.1 | LRR-repeats+AP-GTPase+COR*→                                                                                                                    | LRR-repeats+AP-GTPase+COR       | 935  | EAZ19_16680 | Cyanobacteria       | Oscillatoriales cyanobacterium             | hypothetical protein EAZ19_16680 [Oscillatoriales cyanobacterium].             | GCA_004293705.1 |
| TAH14728.1 | LRR-repeats+AP-GTPase+COR*→                                                                                                                    | LRR-repeats+AP-GTPase+COR       | 344  | EAZ09_26195 | Cyanobacteria       | Oscillatoriales cyanobacterium             | GTP-binding protein, partial [Oscillatoriales cyanobacterium].                 | GCA_004293745.1 |
| TAH21032.1 | Cluster1569_2clades→ ABhydrolase→  <-?  ?→?→?→  <-?  LRR-repeats+AP-GTPase*→                                                                   | LRR-repeats+AP-GTPase           | 257  | EAZ08_04815 | Bacteroidetes       | Cytophagales bacterium                     | hypothetical protein EAZ08_04815 [Cytophagales bacterium].                     | GCA_004294445.1 |
| TAK37700.1 | LRR-repeats+AP-GTPase+COR+EAD11*→ Cluster5_5clades→?→ METHYLASE→                                                                               | LRR-repeats+AP-GTPase+COR+EAD11 | 783  | EPO28_11660 | Bacteroidetes       | Saprospiraceae bacterium                   | hypothetical protein EPO28_11660 [Saprospiraceae bacterium].                   | GCA_004297645.1 |
| TAK50544.1 | Cluster1854_2clades→?→?→ PSE→?→?→  <-Cluster5_5clades  LRR-repeats→ LRR-repeats+AP-GTPase+COR+EAD11*→?→?→?→?→ ABhydrolase→  <-Cluster5_5clades | LRR-repeats+AP-GTPase+COR+EAD11 | 588  | EPO28_00120 | Bacteroidetes       | Saprospiraceae bacterium                   | hypothetical protein EPO28_00120 [Saprospiraceae bacterium].                   | GCA_004297645.1 |
| TAK57982.1 | HhH-RADC+JAB→  <-?  ?→ LRR-repeats+AP-GTPase+COR*→                                                                                             | LRR-repeats+AP-GTPase+COR       | 666  | EPO24_09130 | Bacteroidetes       | Bacteroidetes bacterium                    | GTP-binding protein, partial [Bacteroidetes bacterium].                        | GCA_004322375.1 |
| TAK59812.1 | LRR-repeats+AP-GTPase+COR+TIR*→ tRNA→ tRNA→?→?→ Cluster2248_2clades→                                                                           | LRR-repeats+AP-GTPase+COR+TIR   | 884  | EPO24_07295 | Bacteroidetes       | Bacteroidetes bacterium                    | TIR domain-containing protein [Bacteroidetes bacterium].                       | GCA_004322375.1 |
| TAK63714.1 | LRR-repeats+AP-GTPase+COR+TIR*→                                                                                                                | LRR-repeats+AP-GTPase+COR+TIR   | 903  | EPO24_03975 | Bacteroidetes       | Bacteroidetes bacterium                    | TIR domain-containing protein [Bacteroidetes bacterium].                       | GCA_004322375.1 |
| TFV86935.1 | LRR-repeats+AP-GTPase+COR+DrHyd*→                                                                                                              | LRR-repeats+AP-GTPase+COR+DrHyd | 783  | E4K72_22790 | Betaproteobacteria  | Oxalobacteraceae bacterium OM1             | hypothetical protein E4K72_22790, partial [Oxalobacteraceae bacterium OM1].    | GCA_004570315.1 |
| THV28317.1 | TM→ LRR-repeats+AP-GTPase+COR*→                                                                                                                | LRR-repeats+AP-GTPase+COR       | 1065 | E9998_11935 | Actinobacteria      | Glycomyces paridis                         | hypothetical protein E9998_11935 [Glycomyces paridis].                         | GCA_004912155.1 |
| TKJ39119.1 | SIGMA-HTH→?→?→?→  <-?<-?<-?  LRR-repeats+AP-GTPase+COR*→  <-?<-Ferredoxin-RRM                                                                  | LRR-repeats+AP-GTPase+COR       | 968  | CEE37_11920 | FCB group           | candidate division LCP-89 bacterium B3_LCP | GTPase [candidate division LCP-89 bacterium B3_LCP].                           | GCA_005223185.1 |
| TKJ40235.1 | HISKIN→?→?→?→?→ ACET→ LRR-repeats+AP-GTPase+COR*→?→?→  <-?<-?<-SMPB  ?→ Cluster1833_2clades→                                                   | LRR-repeats+AP-GTPase+COR       | 925  | CEE37_07880 | FCB group           | candidate division LCP-89 bacterium B3_LCP | GTPase [candidate division LCP-89 bacterium B3_LCP].                           | GCA_005223185.1 |
| TKJ41682.1 | TPR+TPR→?→?→ RPN10→?→?→ LRR-repeats+AP-GTPase+COR*→  <-?  LRR-repeats+AP-GTPase+COR→  <-?<-tRNA  RADICAL-SAM→  <-tRNA<-MerR-HTH                | LRR-repeats+AP-GTPase+COR       | 1047 | CEE37_03700 | FCB group           | candidate division LCP-89 bacterium B3_LCP | hypothetical protein CEE37_03700 [candidate division LCP-89 bacterium B3_LCP]. | GCA_005223185.1 |
| TKZ22725.1 | LRR-repeats+AP-GTPase+COR*→  <-?  COR→                                                                                                         | LRR-repeats+AP-GTPase+COR       | 653  | EBE85_34345 | Cyanobacteria       | Hormosilla sp. GUM007                      | hypothetical protein EBE85_34345 [Hormosilla sp. GUM007].                      | -               |
| TKZ31764.1 | Cluster1207_2clades→  <-?<-?<-?<-?<-?<-?  LRR-repeats+AP-GTPase+COR*→ COR→                                                                     | LRR-repeats+AP-GTPase+COR       | 424  | EBE86_14970 | Cyanobacteria       | Hormosilla sp. GUM202                      | hypothetical protein EBE86_14970, partial [Hormosilla sp. GUM202].             | -               |
| TLU81885.1 | Cluster1765_2clades→  <-?<-?  InPase→  <-?  TM→ LRR-repeats+AP-GTPase+COR*→?→?→ ACT→  <-?<-?<-PSE<-DNAJ                                        | LRR-repeats+AP-GTPase+COR       | 953  | FDX21_09980 | Chlorobi            | Chlorobium sp.                             | hypothetical protein FDX21_09980 [Chlorobium sp.].                             | GCA_005862225.1 |
| TLU87350.1 | <-FGS<-?  ?→  <-?<-?  PSE→?→?→ LRR-repeats+AP-GTPase+COR+TIR*→  <-PSE<-RelE-ParE                                                               | LRR-repeats+AP-GTPase+COR+TIR   | 892  | FDX21_00465 | Chlorobi            | Chlorobium sp.                             | TIR domain-containing protein [Chlorobium sp.].                                | GCA_005862225.1 |
| TMQ13801.1 | LRR-repeats+AP-GTPase+COR*→ COR+TIR→                                                                                                           | LRR-repeats+AP-GTPase+COR       | 391  | E6J90_27900 | Deltaproteobacteria | Deltaproteobacteria bacterium              | GTP-binding protein, partial [Deltaproteobacteria bacterium].                  | GCA_005887915.1 |
| TRT70055.1 | LRR-repeats+AP-GTPase+COR+TM+TM*→                                                                                                              | LRR-repeats+AP-GTPase+COR+TM+TM | 710  | EWV84_09945 | Cyanobacteria       | Microcystis sp. M_QC_C_20170808_M3Col      | GTP-binding protein, partial [Microcystis sp. M_QC_C_20170808_M3Col].          | GCA_007095505.1 |
| TRT86788.1 | SIG+TM+TM+TM+TM+TM+TM+TM+TM→  <-?  Mbetalac→ SAM-methylase→?→  <-?<-SIG+TPM_phosphatase+TM+TM+TM  LRR-repeats+AP-GTPase+COR*→                  | LRR-repeats+AP-GTPase+COR       | 597  | EWV66_15420 | Cyanobacteria       | Microcystis sp. M_OC_Ca_00000000_C217Col   | GTP-binding protein, partial [Microcystis sp. M_OC_Ca_00000000_C217Col].       | GCA_007095585.1 |



| acc        | operon                                                                                                                                                                                          | architecture                      | len  | gen.name    | taxend              | species                                                    | define                                                                          | gca             |
|------------|-------------------------------------------------------------------------------------------------------------------------------------------------------------------------------------------------|-----------------------------------|------|-------------|---------------------|------------------------------------------------------------|---------------------------------------------------------------------------------|-----------------|
| TRT92075.1 | Mbetalac→ SAM-methylase→?→  <?  ?→  <-SIG+TPM_phosphatase+TM+TM+TM  LRR-repeats+AP-GTPase+COR+TM+TM*→  <-?<-?<-?<-Pro_CA  ?→  <-?<-tRNA<tRNA<-Ferredoxin-betagrasp                              | LRR-repeats+AP-GTPase+COR+TM+TM   | 874  | EWV65_21090 | Cyanobacteria       | Microcystis flos-aquae<br>Ma_QC_C_20070823_S18D            | GTP-binding protein [Microcystis flos-aquae<br>Ma_QC_C_20070823_S18D].          | GCA_007095605.1 |
| TRU14937.1 | SIG+TM+TM+TM+TM+TM+TM+TM→  <-?  Mbetalac→ SAM-methylase→?→  <-?<-SIG+TPM_phosphatase+TM+TM+TM  LRR-repeats+AP-GTPase+COR+TM+TM*→  <-?<-?<-?<-Pro_CA  ?→  <-?<-tRNA<tRNA<-Ferredoxin-betagrasp   | LRR-repeats+AP-GTPase+COR+TM+TM   | 874  | EWV60_01670 | Cyanobacteria       | Microcystis sp.<br>Msp_OC_L_20101000_S702                  | GTP-binding protein [Microcystis sp. Msp_OC_L_20101000_S702].                   | GCA_007095705.1 |
| TRU25637.1 | LRR-repeats+AP-GTPase+COR+TM+TM*→  <-?<-FGS<-?<-?  ?→?→ Aminotran_1_2→                                                                                                                          | LRR-repeats+AP-GTPase+COR+TM+TM   | 921  | EWV79_07400 | Cyanobacteria       | Microcystis aeruginosa<br>Ma_MB_S_20031200_S102Daeruginosa | GTP-binding protein [Microcystis aeruginosa<br>Ma_MB_S_20031200_S102D].         | GCA_007095795.1 |
| TRU29987.1 | SIG+TM+TM+TM+TM+TM+TM+TM→  <-?  Mbetalac→ SAM-methylase→?→  <-?<-SIG+TPM_phosphatase+TM+TM+TM  LRR-repeats+AP-GTPase+COR+TM+TM*→  <-?<-?<-?<-?<-Pro_CA                                          | LRR-repeats+AP-GTPase+COR+TM+TM   | 921  | EWV80_03065 | Cyanobacteria       | Microcystis aeruginosa<br>Ma_QC_B_20070730_S2              | GTP-binding protein [Microcystis aeruginosa<br>Ma_QC_B_20070730_S2].            | GCA_007095805.1 |
| TRU36579.1 | SIG+TM+TM+TM+TM+TM+TM+TM→  <-PSE  Mbetalac→ SAM-methylase→?→  <-?<-SIG+TPM_phosphatase+TM+TM+TM  LRR-repeats+AP-GTPase+COR+TM+TM*→  <-?<-?<-?<-Pro_CA  ?→  <-?<-tRNA<tRNA<-Ferredoxin-betagrasp | LRR-repeats+AP-GTPase+COR+TM+TM   | 805  | EWV78_08805 | Cyanobacteria       | Microcystis aeruginosa<br>Ma_MB_F_20061100_S20D            | GTP-binding protein [Microcystis aeruginosa<br>Ma_MB_F_20061100_S20D].          | GCA_007095855.1 |
| TRU47882.1 | CHTH→ LRR-repeats+AP-GTPase+COR+TM+TM*→                                                                                                                                                         | LRR-repeats+AP-GTPase+COR+TM+TM   | 874  | EWV49_14300 | Cyanobacteria       | Microcystis aeruginosa<br>Ma_QC_Ch_20071001_S25            | GTP-binding protein [Microcystis aeruginosa<br>Ma_QC_Ch_20071001_S25].          | GCA_007095935.1 |
| TRU57932.1 | CHTH→ LRR-repeats+AP-GTPase+COR*→                                                                                                                                                               | LRR-repeats+AP-GTPase+COR         | 559  | EWV56_15605 | Cyanobacteria       | Microcystis aeruginosa<br>Ma_QC_C_20070823_S13D            | GTP-binding protein, partial [Microcystis aeruginosa<br>Ma_QC_C_20070823_S13D]. | GCA_007095965.1 |
| TRU80903.1 | SIG+TM+TM+TM+TM+TM+TM+TM→  <-?  Mbetalac→ SAM-methylase→?→  <-?<-SIG+TPM_phosphatase+TM+TM+TM  LRR-repeats+AP-GTPase+COR+TM+TM*→                                                                | LRR-repeats+AP-GTPase+COR+TM+TM   | 806  | EWV76_22185 | Cyanobacteria       | Microcystis novacekii<br>Mn_MB_F_20050700_S1               | GTP-binding protein [Microcystis novacekii<br>Mn_MB_F_20050700_S1].             | GCA_007096045.1 |
| TRU95593.1 | Ferredoxin-betagrasp→ tRNA→ tRNA→ SAM-methylase→?→  <-?<-SIG+TPM_phosphatase+TM+TM+TM  LRR-repeats+AP-GTPase+COR+TM+TM*→  <-?<-?<-?<-Pro_CA                                                     | LRR-repeats+AP-GTPase+COR+TM+TM   | 852  | EWV73_20055 | Cyanobacteria       | Microcystis wesenbergii<br>Mw_QC_B_20070930_S4D            | GTP-binding protein [Microcystis wesenbergii<br>Mw_QC_B_20070930_S4D].          | GCA_007096105.1 |
| TRU97707.1 | Ferredoxin-betagrasp→ tRNA→ tRNA→ SAM-methylase→?→  <-?<-SIG+TPM_phosphatase+TM+TM+TM  LRR-repeats+AP-GTPase+COR+TM+TM*→  <-?<-?<-?<-Pro_CA                                                     | LRR-repeats+AP-GTPase+COR+TM+TM   | 943  | EWV75_08635 | Cyanobacteria       | Microcystis wesenbergii<br>Mw_QC_S_20081001_S30D           | GTP-binding protein [Microcystis wesenbergii<br>Mw_QC_S_20081001_S30D].         | GCA_007096035.1 |
| TRU98843.1 | Ferredoxin-betagrasp→ tRNA→ tRNA→ SAM-methylase→?→  <-?<-SIG+TPM_phosphatase+TM+TM+TM  LRR-repeats+AP-GTPase+COR+TM+TM*→  <-?<-?<-?<-Pro_CA                                                     | LRR-repeats+AP-GTPase+COR+TM+TM   | 920  | EWV74_15160 | Cyanobacteria       | Microcystis wesenbergii<br>Mw_QC_S_20081001_S30            | GTP-binding protein [Microcystis wesenbergii<br>Mw_QC_S_20081001_S30].          | GCA_007096535.1 |
| TRV08313.1 | Ferredoxin-betagrasp→ tRNA→ tRNA→ SAM-methylase→?→  <-?<-SIG+TPM_phosphatase+TM+TM+TM  LRR-repeats+AP-GTPase+COR+TM+TM*→?→  <-?<-?<-?  ?→  <-Pro_CA                                             | LRR-repeats+AP-GTPase+COR+TM+TM   | 751  | EWV41_10615 | Cyanobacteria       | Microcystis wesenbergii<br>Mw_MB_S_20031200_S109           | GTP-binding protein [Microcystis wesenbergii<br>Mw_MB_S_20031200_S109].         | GCA_007096585.1 |
| TRV43292.1 | SAM-methylase→?→  <-?<-SIG+TPM_phosphatase+TM+TM+TM  LRR-repeats+AP-GTPase+COR+TM+TM*→  <-?<-?<-?<-Pro_CA  ?→  <-?<-tRNA<tRNA<-Ferredoxin-betagrasp                                             | LRR-repeats+AP-GTPase+COR+TM+TM   | 874  | EWV87_21500 | Cyanobacteria       | Microcystis panniformis<br>Mp_GB_SS_20050300_S99           | GTP-binding protein [Microcystis panniformis<br>Mp_GB_SS_20050300_S99].         | GCA_007096815.1 |
| TVP67596.1 | LRR-repeats+AP-GTPase+COR+TM+TM*→                                                                                                                                                               | LRR-repeats+AP-GTPase+COR+TM+TM   | 667  | EA343_00435 | Cyanobacteria       | Nodularia sp. (in: Bacteria)                               | GTPase, partial [Nodularia sp. (in: Bacteria)].                                 | GCA_007692755.1 |
| TVQ58623.1 | LRR-repeats+AP-GTPase+COR*→  <-Cluster2343_2clades                                                                                                                                              | LRR-repeats+AP-GTPase+COR         | 976  | EA366_06380 | Cyanobacteria       | Spirulina sp. DLM2.Bin59                                   | hypothetical protein EA366_06380 [Spirulina sp. DLM2.Bin59].                    | GCA_007693875.1 |
| TVV43679.1 | <-MarR-HTH<-?<-Cluster1077_2clades  Aminotran_1_2→ PSE→  <-?<-?  ?→ LRR-repeats+AP-GTPase+COR*→                                                                                                 | LRR-repeats+AP-GTPase+COR         | 985  | FOT50_08370 | Gammaproteobacteria | Thalassolituus sp. C2-1                                    | GTP-binding protein [Thalassolituus sp. C2-1].                                  | GCA_007785795.1 |
| TXI24418.1 | LRR-repeats+AP-GTPase+COR+DrHyd*→?→?→?→?→?→ Cluster1726_2clades→                                                                                                                                | LRR-repeats+AP-GTPase+COR+DrHyd   | 1061 | E6Q61_04940 | Betaproteobacteria  | Nitrosomonas sp.                                           | hypothetical protein E6Q61_04940 [Nitrosomonas sp.].                            | GCA_008015595.1 |
| TXL81991.1 | LRR-repeats+AP-GTPase+COR+CASPASE*→                                                                                                                                                             | LRR-repeats+AP-GTPase+COR+CASPASE | 1175 | FHP25_02680 | Alphaproteobacteria | Enhydrobacter sp. CC-CFT640                                | CHAT domain-containing protein [Enhydrobacter sp. CC-CFT640].                   | GCA_008039615.1 |
| TYC52188.1 | WCAK→?→ LRR-repeats→ LRR-repeats+AP-GTPase+COR*→                                                                                                                                                | LRR-repeats+AP-GTPase+COR         | 860  | FMN50_19470 | Alphaproteobacteria | Rhodobacterales bacterium                                  | hypothetical protein FMN50_19470 [Rhodobacterales bacterium].                   | GCA_008107755.1 |

| acc            | operon                                                                                                         | architecture                      | len  | gen.name                         | taxend | species             | define                              | gca                                                                          |                 |
|----------------|----------------------------------------------------------------------------------------------------------------|-----------------------------------|------|----------------------------------|--------|---------------------|-------------------------------------|------------------------------------------------------------------------------|-----------------|
| VFJ48800.1     | RelE-ParE→?→?→ LRR-repeats+AP-GTPase+COR*→                                                                     | LRR-repeats+AP-GTPase+COR         | 467  | BECKDK2373C_GA0170839_GA0170839  | 00081  | Alphaproteobacteria | Candidatus Kentron sp. DK           | Leucine rich repeat-containing protein, partial [Candidatus Kentron sp. DK]. | -               |
| VFJ57569.1     | RelE-ParE→?→ Cluster54_3clades→?→ LRR-repeats+AP-GTPase+COR*→                                                  | LRR-repeats+AP-GTPase+COR         | 1027 | BECKFW1821A_GA0114235_GA0114235  | 00081  | Alphaproteobacteria | Candidatus Kentron sp. FW           | Leucine rich repeat-containing protein [Candidatus Kentron sp. FW].          | -               |
| VFJ62833.1     | Cluster1147_2clades→?→?→ RelE-ParE→?→?→ LRR-repeats+AP-GTPase+COR*→ Cluster2123_2clades→                       | LRR-repeats+AP-GTPase+COR         | 702  | BECKDK2373B_GA0170837_GA0170837  | 00081  | Alphaproteobacteria | Candidatus Kentron sp. DK           | Leucine rich repeat-containing protein [Candidatus Kentron sp. DK].          | -               |
| VFJ65980.1     | Cluster1147_2clades→?→?→ RelE-ParE→?→?→ LRR-repeats+AP-GTPase+COR*→                                            | LRR-repeats+AP-GTPase+COR         | 470  | BECKDK2373C_GA0170839_GA0170839  | 00081  | Alphaproteobacteria | Candidatus Kentron sp. DK           | Leucine rich repeat-containing protein, partial [Candidatus Kentron sp. DK]. | -               |
| VFJ75018.1     | LRR-repeats+AP-GTPase+COR*→                                                                                    | LRR-repeats+AP-GTPase+COR         | 772  | BECKFW1821C_GA0114237_GA0114237  | 00081  | Alphaproteobacteria | Candidatus Kentron sp. FW           | Ras of Complex, Roc, domain of DAPkinase [Candidatus Kentron sp. FW].        | -               |
| VFJ87041.1     | RelE-ParE→ LRR-repeats+AP-GTPase+COR*→                                                                         | LRR-repeats+AP-GTPase+COR         | 1091 | BECKLFY1418B_GA0070995_GA0070995 | 00081  | Alphaproteobacteria | Candidatus Kentron sp. LFY          | Leucine rich repeat-containing protein [Candidatus Kentron sp. LFY].         | -               |
| VFJ90339.1     | RelE-ParE→ LRR-repeats+AP-GTPase+COR*→ COR→                                                                    | LRR-repeats+AP-GTPase+COR         | 380  | BECKLFY1418A_GA0070994_GA0070994 | 00081  | Alphaproteobacteria | Candidatus Kentron sp. LFY          | Leucine rich repeat-containing protein [Candidatus Kentron sp. LFY].         | -               |
| VFK39292.1     | RelE-ParE→?→ LRR-repeats+AP-GTPase+COR*→?→?→ RPN10→                                                            | LRR-repeats+AP-GTPase+COR         | 1088 | BECKTC1821E_GA0114239_GA0114239  | 00081  | Alphaproteobacteria | Candidatus Kentron sp. TC           | Leucine rich repeat-containing protein [Candidatus Kentron sp. TC].          | -               |
| VFK43940.1     | Cluster54_3clades→?→ RelE-ParE→ LRR-repeats+AP-GTPase+COR*→?→ Cluster1137_2clades→?→?→ RPN10→                  | LRR-repeats+AP-GTPase+COR         | 1017 | BECKTC1821D_GA0114238_GA0114238  | 00081  | Alphaproteobacteria | Candidatus Kentron sp. TC           | Leucine rich repeat-containing protein [Candidatus Kentron sp. TC].          | -               |
| VFK55324.1     | RelE-ParE→ LRR-repeats+AP-GTPase+COR*→?→ Cluster1137_2clades→?→?→ RPN10→                                       | LRR-repeats+AP-GTPase+COR         | 1013 | BECKTC1821F_GA0114240_GA0114240  | 00081  | Alphaproteobacteria | Candidatus Kentron sp. TC           | Leucine rich repeat-containing protein [Candidatus Kentron sp. TC].          | -               |
| VUX45208.1     | LRR-repeats+AP-GTPase+COR+TIR*→                                                                                | LRR-repeats+AP-GTPase+COR+TIR     | 1031 | DF3PA_100056                     |        | Alphaproteobacteria | Candidatus Defluviicoccus seviourii | conserved hypothetical protein [Candidatus Defluviicoccus seviourii].        | GCA_900609035.2 |
| VUX54879.1     | <-SIG+Trypsin+PDZ<-?  ?→?→  <-?<-?<-?  LRR-repeats+AP-GTPase+COR*→                                             | LRR-repeats+AP-GTPase+COR         | 935  | JTBB02_V1_20008                  |        | Gammaproteobacteria | uncultured Woeseiaceae bacterium    | protein of unknown function [uncultured Woeseiaceae bacterium].              | GCA_902167415.1 |
| WP_002686189.1 | <-Cluster1370_2clades  CNMP+CRP-HTH→?→  <-?  LRR-repeats+AP-GTPase+COR+DUF4404*→  <-?<-?<-?  ?→ PurT-ATPgrasp→ | LRR-repeats+AP-GTPase+COR+DUF4404 | 1098 | -                                |        | Gammaproteobacteria | Beggiatoa alba                      | leucine-rich repeat domain-containing protein [Beggiatoa alba].              | GCF_000245015.1 |
| WP_002693173.1 | <-NUDIX<-?  ?→?→ SIG+TM+TM+Calcineurin→  <-?  LRR-repeats+AP-GTPase+COR*→  <-?  ?→  <-?  Cluster1843_2clades→  | LRR-repeats+AP-GTPase+COR         | 1282 | -                                |        | Bacteroidetes       | Microscilla marina                  | leucine-rich repeat protein [Microscilla marina].                            | GCF_000169175.1 |
| WP_002693833.1 | LRR-repeats+AP-GTPase+COR+EAD11*→?→  <-PAS+HISKIN                                                              | LRR-repeats+AP-GTPase+COR+EAD11   | 847  | -                                |        | Bacteroidetes       | Microscilla marina                  | leucine rich repeat protein [Microscilla marina].                            | GCF_000169175.1 |
| WP_002694398.1 | NUDIX→  <-?<-?<-?<-?  LRR-repeats+AP-GTPase+COR*→?→?→?→  <-?<-?<-SIGMA-HTH                                     | LRR-repeats+AP-GTPase+COR         | 836  | -                                |        | Bacteroidetes       | Microscilla marina                  | leucine-rich repeat domain-containing protein [Microscilla marina].          | GCF_000169175.1 |
| WP_002703871.1 | ABC_membrane+ABC_tran→?→?→ LRR-repeats+AP-GTPase+COR*→?→?→  <-SIG+SecA<-?<-?<-?  SIGMA-HTH→                    | LRR-repeats+AP-GTPase+COR         | 966  | -                                |        | Bacteroidetes       | Microscilla marina                  | leucine-rich repeat domain-containing protein [Microscilla marina].          | GCF_000169175.1 |
| WP_002704578.1 | <-DAGKIN<-?  ?→ LRR-repeats+AP-GTPase+COR*→  <-?  CNMP+CRP-HTH→  <-?  ?→ InPase→                               | LRR-repeats+AP-GTPase+COR         | 897  | -                                |        | Bacteroidetes       | Microscilla marina                  | leucine-rich repeat domain-containing protein [Microscilla marina].          | GCF_000169175.1 |

| acc            | operon                                                                                                                                                                                         | architecture                      | len  | gen.name | taxend              | species                        | define                                                                          | gca             |
|----------------|------------------------------------------------------------------------------------------------------------------------------------------------------------------------------------------------|-----------------------------------|------|----------|---------------------|--------------------------------|---------------------------------------------------------------------------------|-----------------|
| WP_002736512.1 | SIG+TM+TM+TM+TM+TM+TM+TM+TM→  <?  Mbetalac→ SAM-methylase→?→  <?<-SIG+TPM_phosphatase+TM+TM+TM  LRR-repeats+AP-GTPase+COR+TM+TM*→  <?<-?<-?<-Pro_CA  ?→  <?<-tRNA<-tRNA<-Ferredoxin-beta       | LRR-repeats+AP-GTPase+COR+TM+TM   | 852  | -        | Cyanobacteria       | Microcystis aeruginosa         | leucine-rich repeat protein [Microcystis aeruginosa].                           | GCF_000330925.1 |
| WP_002754362.1 | SIG+TM+TM+TM+TM+TM+TM+TM+TM→  <?  Mbetalac→ SAM-methylase→?→  <?<-SIG+TPM_phosphatase+TM+TM+TM  LRR-repeats+AP-GTPase+COR+TM+TM*→  <?<-?<-?<-Pro_CA  ?→  <?<-tRNA<-tRNA<-Ferredoxin-beta       | LRR-repeats+AP-GTPase+COR+TM+TM   | 806  | -        | Cyanobacteria       | Microcystis aeruginosa         | leucine-rich repeat domain-containing protein [Microcystis aeruginosa].         | GCF_000307995.1 |
| WP_002775884.1 | SIG+TM+TM+TM+TM+TM+TM+TM+TM→  <?  Mbetalac→ SAM-methylase→?→  <?<-SIG+TPM_phosphatase+TM+TM+TM  LRR-repeats+AP-GTPase+COR+TM+TM*→  <?<-?<-?<-Pro_CA  ?→  <?<-tRNA<-tRNA<-Ferredoxin-beta       | LRR-repeats+AP-GTPase+COR+TM+TM   | 783  | -        | Cyanobacteria       | Microcystis aeruginosa         | leucine-rich repeat protein [Microcystis aeruginosa].                           | GCF_000312205.1 |
| WP_002792425.1 | SIG+TM+TM+TM+TM+TM+TM+TM+TM→  <?  Mbetalac→ SAM-methylase→?→  <?<-SIG+TPM_phosphatase+TM+TM+TM  LRR-repeats+AP-GTPase+COR+TM+TM*→  <?<-?<-?<-Pro_CA  ?→  <-PSE<-?<-tRNA<-tRNA<-Ferredoxin-beta | LRR-repeats+AP-GTPase+COR+TM+TM   | 834  | -        | Cyanobacteria       | Microcystis aeruginosa         | leucine-rich repeat domain-containing protein [Microcystis aeruginosa].         | GCF_000312245.1 |
| WP_002797004.1 | SIG+TM+TM+TM+TM+TM+TM+TM+TM→  <?  Mbetalac→ SAM-methylase→?→  <?<-SIG+TPM_phosphatase+TM+TM+TM  LRR-repeats+AP-GTPase+COR+TM+TM*→                                                              | LRR-repeats+AP-GTPase+COR+TM+TM   | 865  | -        | Cyanobacteria       | Microcystis aeruginosa         | leucine-rich repeat protein [Microcystis aeruginosa].                           | GCF_000312265.1 |
| WP_004156960.1 | SIG+TM+TM+TM+TM+TM+TM+TM+TM→  <?  Mbetalac→ SAM-methylase→?→  <?<-SIG+TPM_phosphatase+TM+TM+TM  LRR-repeats+AP-GTPase+COR+TM+TM*→  <?<-?<-?<-Pro_CA  ?→  <?<-tRNA<-tRNA<-Ferredoxin-beta       | LRR-repeats+AP-GTPase+COR+TM+TM   | 875  | -        | Cyanobacteria       | Microcystis aeruginosa         | leucine-rich repeat protein [Microcystis aeruginosa].                           | GCF_000332585.1 |
| WP_005857943.1 | LRR-repeats+AP-GTPase+COR*→  <-tRNA<-?<-?<-?<-Arginase                                                                                                                                         | LRR-repeats+AP-GTPase+COR         | 797  | -        | Alphaproteobacteria | Sagittula stellata             | hypothetical protein [Sagittula stellata].                                      | GCF_000169415.1 |
| WP_006099017.1 | CR-REase5→ Cluster1847_2clades→?→ SIG+WWE→?→ LRR-repeats+AP-GTPase+COR*→?→?→ Pentapeptide-repeats→                                                                                             | LRR-repeats+AP-GTPase+COR         | 1117 | -        | Cyanobacteria       | Coleofasciculus chthonoplastes | leucine-rich repeat domain-containing protein [Coleofasciculus chthonoplastes]. | GCF_000155555.1 |
| WP_006103609.1 | FGS→?→?→?→  <-?  ?→ LRR-repeats+AP-GTPase+COR+TIR*→                                                                                                                                            | LRR-repeats+AP-GTPase+COR+TIR     | 1090 | -        | Cyanobacteria       | Coleofasciculus chthonoplastes | leucine-rich repeat domain-containing protein [Coleofasciculus chthonoplastes]. | GCF_000155555.1 |
| WP_006456809.1 | <-REC  ?→?→ ABC_membrane+ABC_tran→?→  <-?  ?→ LRR-repeats+AP-GTPase+COR*→                                                                                                                      | LRR-repeats+AP-GTPase+COR         | 1260 | -        | Cyanobacteria       | Synechococcus sp. PCC 7335     | leucine-rich repeat domain-containing protein [Synechococcus sp. PCC 7335].     | GCF_000155595.1 |
| WP_006507306.1 | LRR-repeats+AP-GTPase+COR*→                                                                                                                                                                    | LRR-repeats+AP-GTPase+COR         | 705  | -        | Cyanobacteria       | Xenococcus sp. PCC 7305        | small G protein, GTPase SAR1, partial [Xenococcus sp. PCC 7305].                | -               |
| WP_006512482.1 | <-GTPase-AIG  Cluster2189_2clades→  <-?  ?→  <-?  LRR-repeats+AP-GTPase+COR*→?→  <-?<-?<-?<-Pentapeptide-repeats                                                                               | LRR-repeats+AP-GTPase+COR         | 806  | -        | Cyanobacteria       | Xenococcus sp. PCC 7305        | leucine-rich repeat domain-containing protein [Xenococcus sp. PCC 7305].        | GCF_000332055.1 |
| WP_006519951.1 | Cluster2165_2clades→ Cluster1999_2clades→ LRR-repeats+AP-GTPase+COR*→                                                                                                                          | LRR-repeats+AP-GTPase+COR         | 1104 | -        | Cyanobacteria       | Leptolyngbya sp. PCC 7375      | hypothetical protein [Leptolyngbya sp. PCC 7375].                               | GCF_000316115.1 |
| WP_006528821.1 | LRR-repeats+AP-GTPase+COR*→                                                                                                                                                                    | LRR-repeats+AP-GTPase+COR         | 629  | -        | Cyanobacteria       | Gloeocapsa sp. PCC 73106       | leucine-rich repeat domain-containing protein [Gloeocapsa sp. PCC 73106].       | GCF_000332035.1 |
| WP_006631836.1 | LRR-repeats+AP-GTPase+COR+DUF4404*→  <-?<-?<-?<-?  Ferretin→                                                                                                                                   | LRR-repeats+AP-GTPase+COR+DUF4404 | 1060 | -        | Cyanobacteria       | Microcoleus vaginatus          | leucine-rich repeat domain-containing protein [Microcoleus vaginatus].          | GCF_000214075.1 |
| WP_007307526.1 | LRR-repeats+AP-GTPase+COR*→                                                                                                                                                                    | LRR-repeats+AP-GTPase+COR         | 795  | -        | Cyanobacteria       | Crocospaera watsonii           | leucine-rich repeat domain-containing protein [Crocospaera watsonii].           | GCF_000167195.1 |
| WP_007312599.1 | LRR-repeats+AP-GTPase+COR*→                                                                                                                                                                    | LRR-repeats+AP-GTPase+COR         | 378  | -        | Cyanobacteria       | Crocospaera watsonii           | hypothetical protein [Crocospaera watsonii].                                    | GCF_001050835.1 |
| WP_007458231.1 | LRR-repeats+AP-GTPase+COR*→  <-?<-?  ?→  <-?<-?  SIG+TM→ REC→                                                                                                                                  | LRR-repeats+AP-GTPase+COR         | 1135 | -        | Actinobacteria      | Micromonospora lupini          | hypothetical protein [Micromonospora lupini].                                   | GCF_000297395.2 |
| WP_007460872.1 | LRR-repeats+AP-GTPase+COR*→  <-ABC_membrane+ABC_tran                                                                                                                                           | LRR-repeats+AP-GTPase+COR         | 902  | -        | Actinobacteria      | Micromonospora lupini          | leucine-rich repeat domain-containing protein [Micromonospora lupini].          | GCF_000297395.2 |
| WP_008188574.1 | SIG+TM+TM+TM+TM+TM+TM+TM→ ABC-ATPase→ ABC-ATPase→?→?→  <-?<-?  LRR-repeats+AP-GTPase+COR*→?→  <-?<-?  PSE→  <-Cluster5_5clades                                                                 | LRR-repeats+AP-GTPase+COR         | 868  | -        | Cyanobacteria       | Moorea producens               | leucine-rich repeat domain-containing protein [Moorea producens].               | GCF_000211815.1 |

| acc            | operon                                                                                                               | architecture                      | len  | gen.name | taxend              | species                      | define                                                                        | gca             |
|----------------|----------------------------------------------------------------------------------------------------------------------|-----------------------------------|------|----------|---------------------|------------------------------|-------------------------------------------------------------------------------|-----------------|
| WP_008190613.1 | REC→  <-PSE<-HNH<-?  REC→  <-TPR-repeats<-?<-?  LRR-repeats+AP-GTPase+COR+DUF4404*→                                  | LRR-repeats+AP-GTPase+COR+DUF4404 | 948  | -        | Cyanobacteria       | Moorea producens             | leucine-rich repeat domain-containing protein [Moorea producens].             | GCF_000211815.1 |
| WP_008231466.1 | <-Cluster1131_3clades<-?<-Cluster1163_3clades  ?→?→?→ tRNA→ LRR-repeats+AP-GTPase+COR*→                              | LRR-repeats+AP-GTPase+COR         | 970  | -        | Alphaproteobacteria | Roseobacter sp. CCS2         | hypothetical protein [Roseobacter sp. CCS2].                                  | GCF_000169435.1 |
| WP_008273960.1 | Cluster1550_2clades→?→?→ PIN→ LRR-repeats+AP-GTPase+COR*→                                                            | LRR-repeats+AP-GTPase+COR         | 830  | -        | Cyanobacteria       | Crocospaera chwakensis       | leucine-rich repeat domain-containing protein [Crocospaera chwakensis].       | GCF_000169335.1 |
| WP_008277167.1 | <-REC  SIG+TM+TM+TM+TM→  <-?  ?→  <-?  ?→ LRR-repeats+AP-GTPase+COR*→                                                | LRR-repeats+AP-GTPase+COR         | 974  | -        | Cyanobacteria       | Crocospaera chwakensis       | leucine-rich repeat domain-containing protein [Crocospaera chwakensis].       | GCF_000169335.1 |
| WP_008680517.1 | LRR-repeats+AP-GTPase+COR*→                                                                                          | LRR-repeats+AP-GTPase+COR         | 1157 | -        | Planctomycetes      | Rhodopirellula sallentina    | small GTP-binding protein [Rhodopirellula sallentina].                        | GCF_000346505.1 |
| WP_009282559.1 | LRR-repeats+AP-GTPase+COR+TIR*→  <-?<-?  ?→  <-?<-?<-?<-TM+TM+TM+TM+TM                                               | LRR-repeats+AP-GTPase+COR+TIR     | 925  | -        | Bacteroidetes       | Fibrisoma limi               | leucine-rich repeat domain-containing protein [Fibrisoma limi].               | GCF_000296815.2 |
| WP_009283610.1 | <-McrA-NTD  ?→ N-OB→?→?→ LRR-repeats+AP-GTPase+COR+TIR*→ Cluster1088_2clades→?→?→?→  <-SIGMA-HTH                     | LRR-repeats+AP-GTPase+COR+TIR     | 1023 | -        | Bacteroidetes       | Fibrisoma limi               | leucine-rich repeat protein [Fibrisoma limi].                                 | GCF_000296815.2 |
| WP_009627973.1 | LRR-repeats+AP-GTPase+COR+TM+TM*→  <-REC                                                                             | LRR-repeats+AP-GTPase+COR+TM+TM   | 945  | -        | Cyanobacteria       | Pseudanabaena biceps         | leucine-rich repeat domain-containing protein [Pseudanabaena biceps].         | GCF_000332215.1 |
| WP_009964949.1 | <-SMS-KaiC<-?<-?<-Cluster1581_2clades  ?→?→?→ LRR-repeats+AP-GTPase+COR+TIR*→?→ TIR→?→?→ DrHyd+APATPase+TPR+TPR+TPR→ | LRR-repeats+AP-GTPase+COR+TIR     | 961  | -        | Verrucomicrobia     | Verrucomicrobium spinosum    | GTP-binding protein [Verrucomicrobium spinosum].                              | GCF_000172155.1 |
| WP_010471910.1 | <-REC  ?→ LRR-repeats+AP-GTPase+COR*→                                                                                | LRR-repeats+AP-GTPase+COR         | 1082 | -        | Cyanobacteria       | Acaryochloris sp. CCMEE 5410 | leucine-rich repeat domain-containing protein [Acaryochloris sp. CCMEE 5410]. | GCF_000238775.1 |
| WP_010477835.1 | <-ABC_membrane+ABC_tran  ?→?→  <-?<-?  ?→?→ LRR-repeats+AP-GTPase+COR*→                                              | LRR-repeats+AP-GTPase+COR         | 1235 | -        | Cyanobacteria       | Acaryochloris sp. CCMEE 5410 | leucine-rich repeat domain-containing protein [Acaryochloris sp. CCMEE 5410]. | GCF_000238775.1 |
| WP_010933192.1 | <-SIG+TM  LRR-repeats+AP-GTPase+COR*→?→?→?→?→ ParA-Soj-PloopNTPase→                                                  | LRR-repeats+AP-GTPase+COR         | 1102 | -        | Chlorobi            | Chlorobaculum tepidum        | leucine-rich repeat domain-containing protein [Chlorobaculum tepidum].        | GCF_000006985.1 |
| WP_010994301.1 | <-Cluster5_5clades  LRR-repeats+AP-GTPase+COR+DUF4404*→  <-?<-PSE<-?  ?→  <-REC                                      | LRR-repeats+AP-GTPase+COR+DUF4404 | 1119 | -        | Cyanobacteria       | Nostocaceae                  | MULTISPECIES: leucine-rich repeat domain-containing protein [Nostocaceae].    | GCF_000009705.1 |
| WP_011022280.1 | PAS+HISKIN→  <-?  ?→?→?→?→  <-?  LRR-repeats+AP-GTPase+COR*→                                                         | LRR-repeats+AP-GTPase+COR         | 631  | -        | Euryarchaeota       | Methanosarcina acetivorans   | leucine-rich repeat domain-containing protein [Methanosarcina acetivorans].   | -               |
| WP_011307276.1 | <-HhH-RADC+JAB  ?→ NTP_transf_3→ LRR-repeats+AP-GTPase+COR*→  <-?<-?<-?<-Thioredoxin                                 | LRR-repeats+AP-GTPase+COR         | 863  | -        | Euryarchaeota       | Methanosarcina barkeri       | leucine-rich repeat domain-containing protein [Methanosarcina barkeri].       | GCF_000195895.1 |
| WP_011307410.1 | LRR-repeats+AP-GTPase+COR*→                                                                                          | LRR-repeats+AP-GTPase+COR         | 886  | -        | Euryarchaeota       | Methanosarcina barkeri       | leucine-rich repeat domain-containing protein [Methanosarcina barkeri].       | GCF_000195895.1 |
| WP_011308262.1 | <-Mbetalac<-PSE<-PSE  ?→  <-?  ?→?→?→  <-?  LRR-repeats+AP-GTPase+COR*→  <-?  ?→  <-?  ?→ CHTH→  <-?  ABC-ATPase→    | LRR-repeats+AP-GTPase+COR         | 892  | -        | Euryarchaeota       | Methanosarcina barkeri       | leucine-rich repeat domain-containing protein [Methanosarcina barkeri].       | GCF_000195895.1 |
| WP_011318314.1 | <-Cluster5_5clades  LRR-repeats+AP-GTPase+COR+DUF4404*→  <-?<-ABC-ATPase<-?  ?→  <-REC                               | LRR-repeats+AP-GTPase+COR+DUF4404 | 1107 | -        | Cyanobacteria       | Trichormus variabilis        | leucine-rich repeat domain-containing protein [Trichormus variabilis].        | GCF_000204075.1 |
| WP_011361554.1 | BACTERIALFRINGE+TM+TM→?→ LRR-repeats+AP-GTPase+COR*→  <-?<-DAGKIN<-?  ?→ Cluster881_3clades→?→ Cluster1718_2clades→  | LRR-repeats+AP-GTPase+COR         | 811  | -        | Chlorobi            | Chlorobium chlorochromatii   | Rab family protein [Chlorobium chlorochromatii].                              | -               |

| acc            | operon                                                                                                                                                 | architecture                            | len  | gen.name | taxend              | species                     | define                                                                       | gca             |
|----------------|--------------------------------------------------------------------------------------------------------------------------------------------------------|-----------------------------------------|------|----------|---------------------|-----------------------------|------------------------------------------------------------------------------|-----------------|
| WP_011388592.1 | <-ABC_membrane+ABC_tran<-ABC_membrane+ABC_tran<-?<-?<-?<-?  ?→ LRR-repeats+AP-GTPase+COR+TIR*→ TM+TM+TM→                                               | LRR-repeats+AP-GTPase+COR+TIR           | 1085 | -        | Alphaproteobacteria | Rhodospirillum rubrum       | leucine-rich repeat domain-containing protein [Rhodospirillum rubrum].       | GCF_000013085.1 |
| WP_011613173.1 | <-Cluster1413_2clades<-?  TPR-repeats→  <-?<-?<-PSE  LRR-repeats+AP-GTPase+COR*→                                                                       | LRR-repeats+AP-GTPase+COR               | 1041 | -        | Cyanobacteria       | Trichodesmium erythraeum    | leucine-rich repeat domain-containing protein [Trichodesmium erythraeum].    | GCF_000014265.1 |
| WP_011712156.1 | OmpA→?→  <-?<-?<-?  LRR-repeats+AP-GTPase+COR*→                                                                                                        | LRR-repeats+AP-GTPase+COR               | 761  | -        | Alphaproteobacteria | Magnetococcus marinus       | small GTP-binding protein [Magnetococcus marinus].                           | GCF_000014865.1 |
| WP_012162488.1 | CNMP+CRP-HTH→  <-?<-Cluster997_2clades<-?<-Thioredoxin<-SIG+RHOD-CDC25<-ARSR-HTH Cluster1052_2clades→ NUDIX→ LRR-repeats+AP-GTPase+COR+TIR*→ TM+TM+TM→ | LRR-repeats+AP-GTPase+COR+TIR           | 842  | -        | Cyanobacteria       | Acaryochloris marina        | leucine-rich repeat domain-containing protein [Acaryochloris marina].        | GCF_000018105.1 |
| WP_012407958.1 | SIG+PBPB→ HISKIN→ HISKIN→ LRR-repeats+AP-GTPase+COR+TIR*→  <-?  ?→?→?→  <-?  ?→ Pentapeptide-repeats→                                                  | LRR-repeats+AP-GTPase+COR+TIR           | 1185 | -        | Cyanobacteria       | Nostoc punctiforme          | leucine-rich repeat domain-containing protein [Nostoc punctiforme].          | GCF_000020025.1 |
| WP_012412722.1 | LRR-repeats+AP-GTPase+COR*→                                                                                                                            | LRR-repeats+AP-GTPase+COR               | 1124 | -        | Cyanobacteria       | Nostoc punctiforme          | leucine-rich repeat domain-containing protein [Nostoc punctiforme].          | GCF_000020025.1 |
| WP_012466409.1 | <-SF2-DUF3427A+TnsA-REase<-?<-?<-?<-?  ?→?→ LRR-repeats+AP-GTPase+COR+TIR*→ TIR→                                                                       | LRR-repeats+AP-GTPase+COR+TIR           | 998  | -        | Chlorobi            | Chlorobium limicola         | leucine-rich repeat domain-containing protein [Chlorobium limicola].         | GCF_000020465.1 |
| WP_012597192.1 | Cluster1134_2clades→ REase-4→?→?→?→ HAD→ LRR-repeats+AP-GTPase+COR+TM+TM*→                                                                             | LRR-repeats+AP-GTPase+COR+TM+TM         | 937  | -        | Cyanobacteria       | Rippkaea orientalis         | GTP-binding protein [Rippkaea orientalis].                                   | GCF_000021805.1 |
| WP_013320928.1 | Cluster5_5clades→ LRR-repeats+AP-GTPase+COR*→?→ SIG+GT4→  <-?<-?  Cluster5_5clades→                                                                    | LRR-repeats+AP-GTPase+COR               | 876  | -        | Cyanobacteria       | Gloeotheca verrucosa        | leucine-rich repeat domain-containing protein [Gloeotheca verrucosa].        | GCF_000147335.1 |
| WP_013323827.1 | LRR-repeats+AP-GTPase+COR+TM+TM*→                                                                                                                      | LRR-repeats+AP-GTPase+COR+TM+TM         | 857  | -        | Cyanobacteria       | Gloeotheca verrucosa        | leucine-rich repeat domain-containing protein [Gloeotheca verrucosa].        | GCF_000147335.1 |
| WP_013762559.1 | SIGMA-HTH→?→ SIG+TM→ LRR-repeats+AP-GTPase+COR+TIR*→?→ SIGMA-HTH→?→  <-SIG+TM+TM+TM+HISKIN                                                             | LRR-repeats+AP-GTPase+COR+TIR           | 995  | -        | Bacteroidetes       | Haliscomenobacter hydrossis | leucine-rich repeat domain-containing protein [Haliscomenobacter hydrossis]. | GCF_000212735.1 |
| WP_013763674.1 | <-ABC_membrane+ABC_tran  FGS→ PSE→ FGS→ LRR-repeats+AP-GTPase+COR+EAD11+CASPASE*→ RNASEII→                                                             | LRR-repeats+AP-GTPase+COR+EAD11+CASPASE | 1108 | -        | Bacteroidetes       | Haliscomenobacter hydrossis | leucine-rich repeat domain-containing protein [Haliscomenobacter hydrossis]. | GCF_000212735.1 |
| WP_013766755.1 | LRR-repeats+AP-GTPase+COR+EAD11*→                                                                                                                      | LRR-repeats+AP-GTPase+COR+EAD11         | 1448 | -        | Bacteroidetes       | Haliscomenobacter hydrossis | leucine-rich repeat protein [Haliscomenobacter hydrossis].                   | GCF_000212735.1 |
| WP_013767289.1 | <-SIG+ABhydrolase  SIG+7TMR-DISMED1→ FGS→ FGS→ LRR-repeats+AP-GTPase+COR+EAD11*→  <-?<-Cluster1645_2clades                                             | LRR-repeats+AP-GTPase+COR+EAD11         | 840  | -        | Bacteroidetes       | Haliscomenobacter hydrossis | leucine-rich repeat protein [Haliscomenobacter hydrossis].                   | GCF_000212735.1 |
| WP_013768874.1 | LRR-repeats+AP-GTPase+COR+TIR→ LRR-repeats+AP-GTPase+COR*→?→?→?→  <-?  ?→?→  <-REC                                                                     | LRR-repeats+AP-GTPase+COR+TIR           | 741  | -        | Bacteroidetes       | Haliscomenobacter hydrossis | hypothetical protein [Haliscomenobacter hydrossis].                          | GCF_000212735.1 |
| WP_013768875.1 | LRR-repeats+AP-GTPase+COR*→                                                                                                                            | LRR-repeats+AP-GTPase+COR               | 786  | -        | Bacteroidetes       | Haliscomenobacter hydrossis | hypothetical protein [Haliscomenobacter hydrossis].                          | GCF_000212735.1 |
| WP_013818452.1 | LRR-repeats+AP-GTPase+COR+TIR*→                                                                                                                        | LRR-repeats+AP-GTPase+COR+TIR           | 944  | -        | Gammaproteobacteria | Methylomonas methanica      | leucine-rich repeat domain-containing protein [Methylomonas methanica].      | GCF_000214665.1 |
| WP_014444162.1 | REC→  <-?<-?  ?→  <-?<-?<-?  LRR-repeats+AP-GTPase+COR*→  <-?<-7TMR-DISMED1                                                                            | LRR-repeats+AP-GTPase+COR               | 979  | -        | Actinobacteria      | Actinoplanes missouriensis  | hypothetical protein [Actinoplanes missouriensis].                           | GCF_000284295.1 |
| WP_014798951.1 | LRR-repeats+AP-GTPase+COR*→  <-?<-?<-Pkinase+TM+TPR+TPR                                                                                                | LRR-repeats+AP-GTPase+COR               | 1071 | -        | Bacteroidetes       | Bernardetia litoralis       | leucine-rich repeat domain-containing protein [Bernardetia litoralis].       | GCF_000265505.1 |

| acc            | operon                                                                                                                                                  | architecture                       | len  | gen.name | taxend              | species                            | define                                                                              | gca             |
|----------------|---------------------------------------------------------------------------------------------------------------------------------------------------------|------------------------------------|------|----------|---------------------|------------------------------------|-------------------------------------------------------------------------------------|-----------------|
| WP_015112282.1 | <-ParA-Soj-PloopNTPase<-?  ?→ PIN→ LRR-repeats+AP-GTPase+COR+DUF4404*→  <-?<-?  ?→?→  <-?<-?  Thioredoxin→                                              | LRR-repeats+AP-GTPase+COR+DUF4404  | 925  | -        | Cyanobacteria       | Nostoc sp. PCC 7107                | leucine-rich repeat domain-containing protein [Nostoc sp. PCC 7107].                | GCF_000316625.1 |
| WP_015118030.1 | LRR-repeats+AP-GTPase+COR+EAD1*→  <-IG                                                                                                                  | LRR-repeats+AP-GTPase+COR+EAD1     | 955  | -        | Cyanobacteria       | Rivularia sp. PCC 7116             | leucine-rich repeat domain-containing protein [Rivularia sp. PCC 7116].             | GCF_000316665.1 |
| WP_015120500.1 | LRR-repeats+AP-GTPase+COR+EAD1*→?→?→?→?→?→ ABC_membrane+ABC_tran→                                                                                       | LRR-repeats+AP-GTPase+COR+EAD1     | 868  | -        | Cyanobacteria       | Rivularia sp. PCC 7116             | leucine-rich repeat domain-containing protein [Rivularia sp. PCC 7116].             | GCF_000316665.1 |
| WP_015120705.1 | <-Cluster1048_2clades<-?  ?→  <-?  LRR-repeats+AP-GTPase+COR+EAD1*→  <-?<-?  ?→  <-PSE<-?  ABC-ATPase→                                                  | LRR-repeats+AP-GTPase+COR+EAD1     | 989  | -        | Cyanobacteria       | Rivularia sp. PCC 7116             | leucine-rich repeat domain-containing protein [Rivularia sp. PCC 7116].             | GCF_000316665.1 |
| WP_015132911.1 | REase→ LRR-repeats+AP-GTPase+COR+DUF4404*→                                                                                                              | LRR-repeats+AP-GTPase+COR+DUF4404  | 1183 | -        | Cyanobacteria       | Leptolyngbya sp. PCC 7376          | leucine-rich repeat protein [Leptolyngbya sp. PCC 7376].                            | GCF_000316605.1 |
| WP_015135895.1 | <-Cluster998_2clades  ?→?→  <-?  WCAK→  <-?<-?  LRR-repeats+AP-GTPase+COR+TM+TM*→ ABC-ATPase→ ABC_membrane+ABC_tran→  <-?<-?<-?  ISOFLAVOMETHYLASE-HTH→ | LRR-repeats+AP-GTPase+COR+TM+TM    | 925  | -        | Cyanobacteria       | Leptolyngbya sp. PCC 7376          | leucine-rich repeat domain-containing protein [Leptolyngbya sp. PCC 7376].          | GCF_000316605.1 |
| WP_015147146.1 | Pentapeptide-repeats→?→ CBS→ Pentapeptide-repeats→ Pentapeptide-repeats→?→ LRR-repeats+AP-GTPase+COR*→?→?→ Cluster2236_2clades→  <-?<-?<-Hsp10          | LRR-repeats+AP-GTPase+COR          | 922  | -        | Cyanobacteria       | Oscillatoria acuminata             | leucine-rich repeat domain-containing protein [Oscillatoria acuminata].             | GCF_000317105.1 |
| WP_015161253.1 | TM→?→  <-?  SF2-DUF3427A→  <-?  LRR-repeats+AP-GTPase+COR*→  <-?  ?→?→ TRD+TRD→?→ PIN→                                                                  | LRR-repeats+AP-GTPase+COR          | 993  | -        | Cyanobacteria       | Chamaesiphon minutus               | leucine-rich repeat domain-containing protein [Chamaesiphon minutus].               | GCF_000317145.1 |
| WP_015196406.1 | HTH→?→  <-?  LRR-repeats+AP-GTPase+COR+DUF4404*→                                                                                                        | LRR-repeats+AP-GTPase+COR+DUF4404  | 1034 | -        | Cyanobacteria       | Calothrix parietina                | leucine-rich repeat domain-containing protein [Calothrix parietina].                | GCF_000317435.1 |
| WP_015197432.1 | <-Cluster5_5clades<-?<-Cluster5_5clades<-Chelatase-AAA+VWA<-?<-?<-?  LRR-repeats+AP-GTPase+COR+DUF4404*→?→?→ RNASEII→                                   | LRR-repeats+AP-GTPase+COR+DUF4404  | 1408 | -        | Cyanobacteria       | Calothrix parietina                | leucine-rich repeat domain-containing protein [Calothrix parietina].                | GCF_000317435.1 |
| WP_015203756.1 | LRR-repeats+AP-GTPase+COR*→  <-?<-?  TM+TM+TM+TM+TM+TM+TM+TM+TM+TM→                                                                                     | LRR-repeats+AP-GTPase+COR          | 1011 | -        | Cyanobacteria       | Crinalium epipsammum               | leucine-rich repeat domain-containing protein [Crinalium epipsammum].               | GCF_000317495.1 |
| WP_015206852.1 | <-HNH<-?  LRR-repeats+AP-GTPase+COR*→  <-CASPASE+TPR                                                                                                    | LRR-repeats+AP-GTPase+COR          | 938  | -        | Cyanobacteria       | Cylindrospermum stagnale           | leucine-rich repeat protein [Cylindrospermum stagnale].                             | GCF_000317535.1 |
| WP_015280068.1 | <-CENPB  LRR-repeats+AP-GTPase+COR+TIR*→  <-?<-?  MoxR-AAA→ VWA→?→ SIG+TM+VWA+TM→ SIG+TM+VWA+TM→                                                        | LRR-repeats+AP-GTPase+COR+TIR      | 1283 | -        | Gammaproteobacteria | Thioflavicoccus mobilis            | leucine-rich repeat domain-containing protein [Thioflavicoccus mobilis].            | GCF_000327045.1 |
| WP_015361283.1 | Cluster2083_2clades→?→?→?→?→  <-?  ?→ LRR-repeats+AP-GTPase+COR+TIR*→                                                                                   | LRR-repeats+AP-GTPase+COR+TIR      | 1060 | -        | Bacteroidetes       | Nonlabens dokdonensis              | leucine-rich repeat domain-containing protein [Nonlabens dokdonensis].              | GCF_000332115.1 |
| WP_015785030.1 | REase-4→?→?→?→ HAD→ LRR-repeats+AP-GTPase+COR+TM+TM*→                                                                                                   | LRR-repeats+AP-GTPase+COR+TM+TM    | 937  | -        | Cyanobacteria       | Rippkaea orientalis                | GTP-binding protein [Rippkaea orientalis].                                          | GCF_000024045.1 |
| WP_015948508.1 | <-Arginase<-?  ?→?→ LRR-repeats→ LRR-repeats+AP-GTPase+COR+ARSR-HTH*→  <-?<-?<-Nitroreductase-like<-PEP-utilisers-C                                     | LRR-repeats+AP-GTPase+COR+ARSR-HTH | 792  | -        | Deltaproteobacteria | Desulfatibacillum aliphaticivorans | leucine-rich repeat domain-containing protein [Desulfatibacillum aliphaticivorans]. | GCF_000021905.1 |
| WP_015955249.1 | LRR-repeats+AP-GTPase+COR*→  <-DAGKIN<-?<-?  SIG+GT4→                                                                                                   | LRR-repeats+AP-GTPase+COR          | 867  | -        | Cyanobacteria       | Gloeothece citrifomis              | leucine-rich repeat domain-containing protein [Gloeothece citrifomis].              | GCF_000021825.1 |
| WP_015956848.1 | REC+LuxR-HTH→  <-tRNA<-?<-?<-?  PolB→ Cluster2355_2clades→ LRR-repeats+AP-GTPase+COR+TIR*→                                                              | LRR-repeats+AP-GTPase+COR+TIR      | 1015 | -        | Cyanobacteria       | Gloeothece citrifomis              | leucine-rich repeat domain-containing protein [Gloeothece citrifomis].              | GCF_000021825.1 |

| acc                        | operon                                                                                                                                                                                      | architecture                      | len  | gen.name | taxend              | species                          | define                                                                      | gca             |
|----------------------------|---------------------------------------------------------------------------------------------------------------------------------------------------------------------------------------------|-----------------------------------|------|----------|---------------------|----------------------------------|-----------------------------------------------------------------------------|-----------------|
| WP_016798830.1             | CI→ LRR-repeats+AP-GTPase+COR*→                                                                                                                                                             | LRR-repeats+AP-GTPase+COR         | 1080 | -        | Gammaproteobacteria | Vibrio cyclitrophicus            | GTP-binding protein [Vibrio cyclitrophicus].                                | GCF_000256425.1 |
| WP_016860490.1             | <-HISKIN  ?→?→ LRR-repeats→ LRR-repeats+AP-GTPase+COR+TM+TM*→  <-ABydrolase                                                                                                                 | LRR-repeats+AP-GTPase+COR+TM+TM   | 719  | -        | Cyanobacteria       | Fischerella muscicola            | GTP-binding protein [Fischerella muscicola].                                | GCF_000317245.1 |
| WP_016952822.1             | LRR-repeats+AP-GTPase+COR*→                                                                                                                                                                 | LRR-repeats+AP-GTPase+COR         | 829  | -        | Cyanobacteria       | Anabaena sp. PCC 7108            | leucine-rich repeat domain-containing protein [Anabaena sp. PCC 7108].      | GCF_000332135.1 |
| WP_017313212.1             | Cluster1069_2clades→?→?→  <-?  ?→?→ LRR-repeats+AP-GTPase+COR*→  <-?  ?→?→?→ Mbetalac→                                                                                                      | LRR-repeats+AP-GTPase+COR         | 1085 | -        | Cyanobacteria       | Fischerella sp. PCC 9339         | leucine-rich repeat protein [Fischerella sp. PCC 9339].                     | GCF_000315585.1 |
| WP_017720442.1             | LRR-repeats+AP-GTPase+COR*→                                                                                                                                                                 | LRR-repeats+AP-GTPase+COR         | 852  | -        | Cyanobacteria       | Oscillatoria sp. PCC 10802       | leucine-rich repeat domain-containing protein [Oscillatoria sp. PCC 10802]. | GCF_000332335.1 |
| WP_017739957.1             | Cluster5_5clades→?→  <-Cluster5_5clades  ?→ PSE→  <-?<-PSE  ?→ LRR-repeats+AP-GTPase+COR+EAD1*→ PSE→?→?→ Cluster2194_2clades→  <-?  Cluster1640_2clades→                                    | LRR-repeats+AP-GTPase+COR+EAD1    | 965  | -        | Cyanobacteria       | Scytonema hofmannii              | leucine-rich repeat domain-containing protein [Scytonema hofmannii].        | GCF_000346485.2 |
| WP_018619729.1             | <-HISKIN<-?  Cluster1877_2clades→ LRR-repeats+AP-GTPase+COR*→                                                                                                                               | LRR-repeats+AP-GTPase+COR         | 925  | -        | Bacteroidetes       | Spirosoma luteum                 | leucine-rich repeat domain-containing protein [Spirosoma luteum].           | GCF_000374065.1 |
| WP_019496026.1             | ParB→  <-?<-TM+TM  ?→ SIG+TM+TM+TM+TM+TM+TM+TM+TM+TM+TM+TM+TM→?→ EAD1+LRR-repeats+AP-GTPase+COR*→?→?→?→?→ SIG+GT4→  <-PSE  ?→ TPR+nSTAND1+BetaPropeller_WD40+BetaPropeller_WD40→            | EAD1+LRR-repeats+AP-GTPase+COR    | 961  | -        | Cyanobacteria       | Calothrix sp. PCC 7103           | leucine-rich repeat domain-containing protein [Calothrix sp. PCC 7103].     | GCF_000331305.1 |
| WP_019496060.1             | Cluster5_5clades→ LRR-repeats+AP-GTPase+COR+EAD1*→ PSE→?→  <-CR-REase5  ?→ APATPase+BetaPropeller_WD40-repeats→?→ APATPase+BetaPropeller_WD40-repeats→ APATPase+BetaPropeller_WD40-repeats→ | LRR-repeats+AP-GTPase+COR+EAD1    | 912  | -        | Cyanobacteria       | Calothrix sp. PCC 7103           | leucine-rich repeat domain-containing protein [Calothrix sp. PCC 7103].     | GCF_000331305.1 |
| WP_019867072.1             | LRR-repeats+AP-GTPase+COR+TIR*→                                                                                                                                                             | LRR-repeats+AP-GTPase+COR+TIR     | 856  | -        | Gammaproteobacteria | Methylovulum miyakonense         | TIR domain-containing protein [Methylovulum miyakonense].                   | GCF_000384075.1 |
| WP_020379418.1             | SF2-DUF3427A+TnsA-REase→ DAM→ LRR-repeats+AP-GTPase+COR+TM+TM*→                                                                                                                             | LRR-repeats+AP-GTPase+COR+TM+TM   | 1195 | -        | Actinobacteria      | Candidatus Microthrix parvicella | hypothetical protein [Candidatus Microthrix parvicella].                    | GCF_000299415.1 |
| WP_020396599.1             | LRR-repeats+AP-GTPase+COR+TIR*→ TM+TM+TM→                                                                                                                                                   | LRR-repeats+AP-GTPase+COR+TIR     | 767  | -        | Gammaproteobacteria | Thiolinea disciformis            | TIR domain-containing protein, partial [Thiolinea disciformis].             | GCF_000371925.1 |
| WP_020483095.1             | Cluster1270_2clades→  <-?<-?<-?<-?<-?  ?→ LRR-repeats+AP-GTPase+COR*→  <-?<-?<-?<-?  ?→ SIGMA-HTH→                                                                                          | LRR-repeats+AP-GTPase+COR         | 1111 | -        | Gammaproteobacteria | Methylomonas sp. MK1             | leucine-rich repeat domain-containing protein [Methylomonas sp. MK1].       | GCF_000365425.1 |
| WP_020496162.1             | <-ISOCOT<-?<-?  InPase→  <-?  LRR-repeats+AP-GTPase+COR*→                                                                                                                                   | LRR-repeats+AP-GTPase+COR         | 833  | -        | Actinobacteria      | Sciscionella marina              | hypothetical protein [Sciscionella marina].                                 | GCF_000379465.1 |
| WP_020559023.1             | Cluster2057_2clades→ LRR-repeats+AP-GTPase+COR+TIR→?→?→?→?→?→ LRR-repeats+AP-GTPase+COR+TIR→ Cluster54_3clades→ PSE→  <-TIR+TPR+TPR-S                                                       | LRR-repeats+AP-GTPase+COR+TIR     | 972  | -        | Gammaproteobacteria | Thiofilum flexile                | leucine-rich repeat domain-containing protein [Thiofilum flexile].          | GCF_000380185.1 |
| WP_020559030.1             | LRR-repeats+AP-GTPase+COR+TIR*→                                                                                                                                                             | LRR-repeats+AP-GTPase+COR+TIR     | 943  | -        | Gammaproteobacteria | Thiofilum flexile                | leucine-rich repeat domain-containing protein [Thiofilum flexile].          | GCF_000380185.1 |
| WP_020560643.1             | LRR-repeats+AP-GTPase+COR+TIR*→ TM+TM+TM→                                                                                                                                                   | LRR-repeats+AP-GTPase+COR+TIR     | 900  | -        | Gammaproteobacteria | Thiofilum flexile                | TIR domain-containing protein [Thiofilum flexile].                          | GCF_000380185.1 |
| WP_020570498.1             | <-SIG+ABhydrolase<-?<-?<-?  LRR-repeats+AP-GTPase+COR+CASPASE*→?→ FGS→?→ RVT→?→ FGS→                                                                                                        | LRR-repeats+AP-GTPase+COR+CASPASE | 1039 | -        | Bacteroidetes       | Lewinella persica                | CHAT domain-containing protein [Lewinella persica].                         | GCF_000373105.1 |
| WP_020607470.1             | LRR-repeats+AP-GTPase+COR+TIR*→                                                                                                                                                             | LRR-repeats+AP-GTPase+COR+TIR     | 954  | -        | Bacteroidetes       | Spirosoma spitsbergense          | leucine-rich repeat domain-containing protein [Spirosoma spitsbergense].    | GCF_000374085.1 |
| WP_021020180.Polbeta+HEPN→ | LRR-repeats→ LRR-repeats+AP-GTPase+COR+TIR*→?→  <-?  ?→?→ SIG+TM+TM+TM+TM+TM+TM+TM+TM+TM+TM+TM+TM→ SIG+TM→                                                                                  | LRR-repeats+AP-GTPase+COR+TIR     | 944  | -        | Gammaproteobacteria | Vibrio gazogenes                 | TIR domain-containing protein [Vibrio gazogenes].                           | GCF_000390165.1 |
| WP_021802668.1             | HAD→?→?→?→ Cluster881_3clades→ LRR-repeats+AP-GTPase+COR*→?→?→?→?→?→ Cluster1292_2clades→                                                                                                   | LRR-repeats+AP-GTPase+COR         | 936  | -        | Firmicutes          | Clostridium intestinale          | GTP-binding protein [Clostridium intestinale].                              | GCF_013781885.1 |

| acc            | operon                                                                                                                    | architecture                  | len  | gen.name | taxend              | species                          | define                                                                                    | gca             |
|----------------|---------------------------------------------------------------------------------------------------------------------------|-------------------------------|------|----------|---------------------|----------------------------------|-------------------------------------------------------------------------------------------|-----------------|
| WP_022571049.1 | CI→ LRR-repeats+AP-GTPase+COR*→                                                                                           | LRR-repeats+AP-GTPase+COR     | 1095 | -        | Gammaproteobacteria | Vibrio cyclitrophicus            | leucine rich repeat protein [Vibrio cyclitrophicus].                                      | GCF_000473545.1 |
| WP_022589047.1 | ABC-ATPase→?→?→  <-Acylphosphatase  ?→?→  <-?  LRR-repeats+AP-GTPase+COR+TIR*→                                            | LRR-repeats+AP-GTPase+COR+TIR | 1264 | -        | Gammaproteobacteria | Vibrio nigripulchritudo          | TIR domain-containing protein [Vibrio nigripulchritudo].                                  | GCF_900067775.1 |
| WP_023074611.1 | LRR-repeats+AP-GTPase+COR+TIR*→  <-?  ?→  <-?  Cluster1646_2clades→                                                       | LRR-repeats+AP-GTPase+COR+TIR | 777  | -        | Cyanobacteria       | Leptolyngbya sp. Heron Island J  | leucine-rich repeat domain-containing protein, partial [Leptolyngbya sp. Heron Island J]. | GCF_000482245.1 |
| WP_023076066.1 | Cluster53_2clades→  <-RelE-ParE<-?  LRR-repeats+AP-GTPase+COR+TIR*→  <-?  ?→  <-?  ?→?→  <-?<-SIG+TM+TM+TM+TM+TM+TM       | LRR-repeats+AP-GTPase+COR+TIR | 1129 | -        | Cyanobacteria       | Leptolyngbya sp. Heron Island J  | leucine-rich repeat domain-containing protein [Leptolyngbya sp. Heron Island J].          | GCF_000482245.1 |
| WP_023571556.1 | LRR-repeats+AP-GTPase+COR+TIR*→                                                                                           | LRR-repeats+AP-GTPase+COR+TIR | 1142 | -        | Bacteroidetes       | Flavobacterium cauense           | TIR domain-containing protein [Flavobacterium cauense].                                   | GCF_000498475.1 |
| WP_024594403.1 | LRR-repeats+AP-GTPase+COR*→                                                                                               | LRR-repeats+AP-GTPase+COR     | 982  | -        | Gammaproteobacteria | Pseudoalteromonas sp. TB13       | GTP-binding protein [Pseudoalteromonas sp. TB13].                                         | GCF_000497915.1 |
| WP_025517521.1 | CI→ LRR-repeats+AP-GTPase+COR*→                                                                                           | LRR-repeats+AP-GTPase+COR     | 1105 | -        | Gammaproteobacteria | Vibrio parahaemolyticus          | 50S ribosome-binding GTPase [Vibrio parahaemolyticus].                                    | GCF_000489555.1 |
| WP_025605295.1 | CI→?→ PSE→ LRR-repeats+AP-GTPase+COR+TIR*→                                                                                | LRR-repeats+AP-GTPase+COR+TIR | 1265 | -        | Gammaproteobacteria | Vibrio parahaemolyticus          | TIR domain-containing protein [Vibrio parahaemolyticus].                                  | GCF_000489075.1 |
| WP_026726296.1 | LRR-repeats+AP-GTPase+COR*→                                                                                               | LRR-repeats+AP-GTPase+COR     | 698  | -        | Bacteroidetes       | Flavobacterium sasangense        | GTP-binding protein [Flavobacterium sasangense].                                          | GCF_000686885.1 |
| WP_028083535.1 | LRR-repeats+AP-GTPase+COR*→                                                                                               | LRR-repeats+AP-GTPase+COR     | 993  | -        | Cyanobacteria       | Dolichospermum circinale         | leucine-rich repeat domain-containing protein [Dolichospermum circinale].                 | GCF_000426925.1 |
| WP_028469928.1 | LRR-repeats+AP-GTPase+COR*→?→?→ GTPase-AIG→                                                                               | LRR-repeats+AP-GTPase+COR     | 697  | -        | Gammaproteobacteria | Neptunomonas japonica            | hypothetical protein [Neptunomonas japonica].                                             | GCF_000422765.1 |
| WP_028667519.1 | <-Cluster1063_3clades<-Cluster1067_3clades  ?→?→?→ LRR-repeats+AP-GTPase+COR*→                                            | LRR-repeats+AP-GTPase+COR     | 798  | -        | Bacteroidetes       | Runella zeae                     | GTP-binding protein [Runella zeae].                                                       | GCF_000423565.1 |
| WP_029631472.1 | LRR-repeats+AP-GTPase+COR*→                                                                                               | LRR-repeats+AP-GTPase+COR     | 1051 | -        | Planctomycetes      | Zavarzinella formosa             | leucine-rich repeat domain-containing protein [Zavarzinella formosa].                     | GCF_000255705.1 |
| WP_030435343.1 | REC→ PSE→?→?→  <-?  ?→ Cluster2103_2clades→  <-?  LRR-repeats+AP-GTPase+COR*→ AP-GTPase+COR+TM+TM→  <-REC<-?  ABC-ATPase→ | LRR-repeats+AP-GTPase+COR     | 551  | -        | Actinobacteria      | Actinoplanes subtropicus         | GTP-binding protein [Actinoplanes subtropicus].                                           | GCF_000721705.1 |
| WP_030488330.1 | LRR-repeats+AP-GTPase+COR*→  <-?<-?  ?→?→  <-?  SIG+TM→ REC→                                                              | LRR-repeats+AP-GTPase+COR     | 1088 | -        | Actinobacteria      | Micromonospora chokoriensis      | hypothetical protein [Micromonospora chokoriensis].                                       | GCF_000718555.1 |
| WP_031429699.1 | CI→?→ PSE→ LRR-repeats+AP-GTPase+COR+TIR*→                                                                                | LRR-repeats+AP-GTPase+COR+TIR | 1261 | -        | Gammaproteobacteria | Vibrio parahaemolyticus          | TIR domain-containing protein [Vibrio parahaemolyticus].                                  | GCF_000736345.1 |
| WP_034058880.1 | S1COLD→?→  <-?  ?→?→  <-?  ?→ LRR-repeats+AP-GTPase+COR*→                                                                 | LRR-repeats+AP-GTPase+COR     | 924  | -        | Bacteroidetes       | Lacinutrix jangbogonensis        | leucine-rich repeat domain-containing protein [Lacinutrix jangbogonensis].                | GCF_000797445.1 |
| WP_035121352.1 | LRR-repeats+AP-GTPase+COR+TIR*→  <-?<-?<-?<-ABC-ATPase                                                                    | LRR-repeats+AP-GTPase+COR+TIR | 1115 | -        | Cyanobacteria       | Fischerella sp. PCC 9431         | leucine-rich repeat domain-containing protein [Fischerella sp. PCC 9431].                 | GCF_000447295.1 |
| WP_035197779.1 | LRR-repeats+AP-GTPase+COR*→                                                                                               | LRR-repeats+AP-GTPase+COR     | 914  | -        | Firmicutes          | Calidifontibacillus azotoformans | GTP-binding protein [Calidifontibacillus azotoformans].                                   | GCF_000708505.1 |
| WP_035613546.1 | LRR-repeats+AP-GTPase+COR*→                                                                                               | LRR-repeats+AP-GTPase+COR     | 1058 | -        | Verrucomicrobia     | Haloferula sp. BvORR071          | hypothetical protein [Haloferula sp. BvORR071].                                           | -               |
| WP_035758421.1 | LRR-repeats+AP-GTPase+COR*→                                                                                               | LRR-repeats+AP-GTPase+COR     | 956  | -        | Bacteroidetes       | Hughenoltzia roseola             | leucine-rich repeat protein, partial [Hughenoltzia roseola].                              | GCF_000422585.1 |
| WP_038164534.1 | LRR-repeats+AP-GTPase+COR+TIR*→                                                                                           | LRR-repeats+AP-GTPase+COR+TIR | 793  | -        | Verrucomicrobia     | Verrucomicrobium sp. BvORR106    | TIR domain-containing protein [Verrucomicrobium sp. BvORR106].                            | -               |
| WP_039108669.1 | <-Cluster1070_2clades<-ENDO3+NUDIX  HU-IHF→?→ LRR-repeats+AP-GTPase+COR*→                                                 | LRR-repeats+AP-GTPase+COR     | 912  | -        | Bacteroidetes       | Flavobacterium sp. AED           | leucine-rich repeat domain-containing protein [Flavobacterium sp. AED].                   | GCF_000812945.1 |







| acc            | operon                                                                                                                 | architecture                  | len  | gen.name | taxend              | species                      | define                                                                        | gca             |
|----------------|------------------------------------------------------------------------------------------------------------------------|-------------------------------|------|----------|---------------------|------------------------------|-------------------------------------------------------------------------------|-----------------|
| WP_052718311.1 | LRR-repeats+AP-GTPase+COR*→                                                                                            | LRR-repeats+AP-GTPase+COR     | 999  | -        | Euryarchaeota       | Methanosarcina sp. MTP4      | leucine-rich repeat domain-containing protein [Methanosarcina sp. MTP4].      | GCF_000970045.1 |
| WP_052718346.1 | LRR-repeats+AP-GTPase+COR*→?→  <-?<-SIG+TM+TM+TM+TM+TM<-ABC-ATPase                                                     | LRR-repeats+AP-GTPase+COR     | 891  | -        | Euryarchaeota       | Methanosarcina sp. MTP4      | leucine-rich repeat domain-containing protein [Methanosarcina sp. MTP4].      | GCF_000970045.1 |
| WP_052721594.1 | <-HhH-RADC+JAB  ?→ NTP_transf_3→ LRR-repeats+AP-GTPase+COR*→                                                           | LRR-repeats+AP-GTPase+COR     | 890  | -        | Euryarchaeota       | Methanosarcina siciliae      | leucine-rich repeat domain-containing protein [Methanosarcina siciliae].      | GCF_000970085.1 |
| WP_052725465.1 | <-HhH-RADC+JAB  ?→ NTP_transf_3→ LRR-repeats+AP-GTPase+COR*→                                                           | LRR-repeats+AP-GTPase+COR     | 886  | -        | Euryarchaeota       | Methanosarcina sp. Kolksee   | leucine-rich repeat domain-containing protein [Methanosarcina sp. Kolksee].   | GCF_000969945.1 |
| WP_052725699.1 | <-HhH-RADC+JAB  ?→ NTP_transf_3→ LRR-repeats+AP-GTPase+COR*→  <-?<-?  ?→  <-?<-?  SIR2→                                | LRR-repeats+AP-GTPase+COR     | 926  | -        | Euryarchaeota       | Methanosarcina barkeri       | leucine-rich repeat domain-containing protein [Methanosarcina barkeri].       | GCF_000970065.1 |
| WP_052725704.1 | <-SIG+TPR+TPR+TPR+TPR+TPR+TPR  ?→  <-?  ?→?→ PSE→?→ LRR-repeats+AP-GTPase+COR*→?→?→ PRTase→                            | LRR-repeats+AP-GTPase+COR     | 886  | -        | Euryarchaeota       | Methanosarcina barkeri       | leucine-rich repeat domain-containing protein [Methanosarcina barkeri].       | GCF_000970065.1 |
| WP_052727304.1 | PAS+HISKIN→  <-?  ?→?→?→?→  <-PSE  LRR-repeats+AP-GTPase+COR*→  <-?  ?→ PSE→  <-?  Cluster1640_2clades→  <-SIG+HIN-HTH | LRR-repeats+AP-GTPase+COR     | 1010 | -        | Euryarchaeota       | Methanosarcina siciliae      | leucine-rich repeat domain-containing protein [Methanosarcina siciliae].      | GCF_000970145.1 |
| WP_052727948.1 | LRR-repeats+AP-GTPase+COR+TIR*→?→?→?→?→?→ PSE→  <-TPR-repeats                                                          | LRR-repeats+AP-GTPase+COR+TIR | 877  | -        | Euryarchaeota       | Methanosarcina vacuolata     | leucine-rich repeat domain-containing protein [Methanosarcina vacuolata].     | GCF_000969905.1 |
| WP_052727973.1 | <-HhH-RADC+JAB  ?→ NTP_transf_3→ LRR-repeats+AP-GTPase+COR*→                                                           | LRR-repeats+AP-GTPase+COR     | 886  | -        | Euryarchaeota       | Methanosarcina vacuolata     | leucine-rich repeat domain-containing protein [Methanosarcina vacuolata].     | GCF_000969905.1 |
| WP_052728059.1 | LRR-repeats+AP-GTPase+COR*→                                                                                            | LRR-repeats+AP-GTPase+COR     | 930  | -        | Euryarchaeota       | Methanosarcina mazei         | leucine-rich repeat domain-containing protein [Methanosarcina mazei].         | GCF_000970205.1 |
| WP_052728060.1 | <-PIN<-?<-SIG+TM+TM+TM+TM+TM+TM+TM+TM+TM+TM+TM+TM+TM  ?→?→ LRR-repeats+AP-GTPase+COR*→                                 | LRR-repeats+AP-GTPase+COR     | 935  | -        | Euryarchaeota       | Methanosarcina mazei         | leucine-rich repeat domain-containing protein [Methanosarcina mazei].         | GCF_000970205.1 |
| WP_052735402.1 | LRR-repeats+AP-GTPase+COR*→                                                                                            | LRR-repeats+AP-GTPase+COR     | 845  | -        | Euryarchaeota       | Methanosarcina sp. 1.H.A.2.2 | leucine-rich repeat domain-containing protein [Methanosarcina sp. 1.H.A.2.2]. | GCF_000979975.1 |
| WP_052752245.1 | LRR-repeats+AP-GTPase+COR*→ TIR→                                                                                       | LRR-repeats+AP-GTPase+COR     | 1015 | -        | Betaproteobacteria  | Nitrosomonas communis        | leucine-rich repeat domain-containing protein [Nitrosomonas communis].        | GCF_001007935.1 |
| WP_054015538.1 | <-REC  ?→  <-?  ?→ LRR-repeats+AP-GTPase+COR+TIR*→                                                                     | LRR-repeats+AP-GTPase+COR+TIR | 1274 | -        | Gammaproteobacteria | Pseudoalteromonas sp. R3     | TIR domain-containing protein [Pseudoalteromonas sp. R3].                     | GCF_004014715.1 |
| WP_054015917.1 | LRR-repeats+AP-GTPase+COR+TIR*→  <-?<-?<-TM                                                                            | LRR-repeats+AP-GTPase+COR+TIR | 1128 | -        | Gammaproteobacteria | Pseudoalteromonas sp. R3     | leucine-rich repeat domain-containing protein [Pseudoalteromonas sp. R3].     | GCF_004014715.1 |
| WP_054961809.1 | DSBH+AraC-HTH+AraC-HTH→?→ LRR-repeats+AP-GTPase+COR*→  <-ABC_membrane+ABC_tran                                         | LRR-repeats+AP-GTPase+COR     | 1057 | -        | Gammaproteobacteria | Vibrio bivalvicida           | hypothetical protein [Vibrio bivalvicida].                                    | GCF_001399455.2 |
| WP_055505179.1 | <-ABC-ATPase<-?  ?→?→?→  <-?  LRR-repeats+AP-GTPase+COR*→?→?→?→  <-?<-?<-SIR2                                          | LRR-repeats+AP-GTPase+COR     | 941  | -        | Actinobacteria      | Nonomuraea pusilla           | leucine-rich repeat domain-containing protein [Nonomuraea pusilla].           | GCF_001417755.1 |
| WP_057935115.1 | SIG+Concanavalin-like+SUN→  <-?  ?→ FGS→?→?→?→ LRR-repeats+AP-GTPase+COR+TIR*→?→?→?→  <-?<-?  ?→ TIR→                  | LRR-repeats+AP-GTPase+COR+TIR | 1318 | -        | Bacteroidetes       | Pedobacter ginsenosidimutans | leucine-rich repeat domain-containing protein [Pedobacter ginsenosidimutans]. | GCF_001442625.1 |





| acc            | operon                                                                                               | architecture                      | len  | gen.name | taxend              | species                        | define                                                                                  | gca             |
|----------------|------------------------------------------------------------------------------------------------------|-----------------------------------|------|----------|---------------------|--------------------------------|-----------------------------------------------------------------------------------------|-----------------|
| WP_075170580.1 | RNA-Helicase→  <-PSE<-?<-?<-?<-?  ?→  <-TM+TM  LRR-repeats+AP-GTPase+COR*→  <-?<-Cluster1726_2clades | LRR-repeats+AP-GTPase+COR         | 960  | -        | Gammaproteobacteria | Pseudoalteromonas haloplanktis | GTP-binding protein [Pseudoalteromonas haloplanktis].                                   | GCF_001924935.1 |
| WP_075904287.1 | ABC-ATPase→ ABC-ATPase→?→?→  <-?  LRR-repeats+AP-GTPase+COR*→                                        | LRR-repeats+AP-GTPase+COR         | 801  | -        | Cyanobacteria       | Moorea bouillonii              | leucine-rich repeat domain-containing protein [Moorea bouillonii].                      | GCF_001942495.1 |
| WP_076382638.1 | <-Polbeta+HEPN<-?  ?→ LRR-repeats+AP-GTPase+COR+TIR*→ TIR→ TM+TM+TM→?→?→  <-CNMP+CRP-HTH             | LRR-repeats+AP-GTPase+COR+TIR     | 1349 | -        | Bacteroidetes       | Filimonas lacunae              | TIR domain-containing protein [Filimonas lacunae].                                      | GCF_002355595.1 |
| WP_076393053.1 | LRR-repeats+AP-GTPase+COR*→                                                                          | LRR-repeats+AP-GTPase+COR         | 925  | -        | Bacteroidetes       | Chryseobacterium               | MULTISPECIES: leucine-rich repeat domain-containing protein [Chryseobacterium].         | GCF_900156825.1 |
| WP_076396200.1 | LRR-repeats+AP-GTPase+COR*→  <-?  ?→ SIG+NUDIX→                                                      | LRR-repeats+AP-GTPase+COR         | 890  | -        | Bacteroidetes       | Chryseobacterium gambrii       | hypothetical protein [Chryseobacterium gambrii].                                        | GCF_900156825.1 |
| WP_076994187.1 | <-ABC-ATPase<-?  ?→?→  <-?  PSE→  <-?  LRR-repeats+AP-GTPase+COR*→  <-?  ?→  <-?<-?<-Aminotran_1_2   | LRR-repeats+AP-GTPase+COR         | 942  | -        | Actinobacteria      | Actinosynnema sp. ALI-1.44     | hypothetical protein [Actinosynnema sp. ALI-1.44].                                      | GCF_001984155.1 |
| WP_077025618.1 | LRR-repeats+AP-GTPase+COR*→?→  <-?<-?  ?→  <-?<-?<-ABC-ATPase                                        | LRR-repeats+AP-GTPase+COR         | 1153 | -        | Planctomycetes      | Fuerstia marisgermanicae       | leucine-rich repeat domain-containing protein [Fuerstia marisgermanicae].               | GCF_001983935.1 |
| WP_078402495.1 | LRR-repeats+AP-GTPase+COR*→                                                                          | LRR-repeats+AP-GTPase+COR         | 901  | -        | Bacteroidetes       | Elizabethkingia ursingii       | leucine-rich repeat domain-containing protein [Elizabethkingia ursingii].               | GCF_002022125.1 |
| WP_078608910.1 | <-RNA-Helicase  ?→?→  <-?  CI→ LRR-repeats+AP-GTPase+COR*→                                           | LRR-repeats+AP-GTPase+COR         | 1012 | -        | Gammaproteobacteria | Vibrio owensii                 | GTP-binding protein [Vibrio owensii].                                                   | GCF_002021755.1 |
| WP_078814763.1 | <-REC  LRR-repeats+AP-GTPase+COR+TIR*→?→?→  <-?  ?→  <-?<-NUDIX                                      | LRR-repeats+AP-GTPase+COR+TIR     | 959  | -        | Verrucomicrobia     | Prostheco bacter debontii      | leucine-rich repeat domain-containing protein [Prostheco bacter debontii].              | GCF_900167535.1 |
| WP_079184311.1 | LRR-repeats+AP-GTPase+COR*→?→  <-?<-SIGMA-HTH                                                        | LRR-repeats+AP-GTPase+COR         | 1056 | -        | Actinobacteria      | Streptomyces uncialis          | hypothetical protein [Streptomyces uncialis].                                           | GCF_001905345.1 |
| WP_079712025.1 | LRR-repeats+AP-GTPase+COR*→                                                                          | LRR-repeats+AP-GTPase+COR         | 882  | -        | Bacteroidetes       | Salegentibacter salinarum      | hypothetical protein [Salegentibacter salinarum].                                       | GCF_900168115.1 |
| WP_080603599.1 | LRR-repeats+AP-GTPase+COR+TM+TM*→                                                                    | LRR-repeats+AP-GTPase+COR+TM+TM   | 799  | -        | Cyanobacteria       | Microcystis aeruginosa         | leucine-rich repeat protein [Microcystis aeruginosa].                                   | -               |
| WP_080963556.1 | Cluster1140_2clades→?→ LRR-repeats+AP-GTPase+COR+TM+TM*→                                             | LRR-repeats+AP-GTPase+COR+TM+TM   | 830  | -        | Gammaproteobacteria | Pseudomonas putida             | GTP-binding protein [Pseudomonas putida].                                               | GCF_001027965.1 |
| WP_081155426.1 | LRR-repeats+AP-GTPase+COR*→  <-?<-?<-?<-?  ?→  <-?<-REC                                              | LRR-repeats+AP-GTPase+COR         | 1088 | -        | Bacteroidetes       | Niastella vici                 | hypothetical protein [Niastella vici].                                                  | GCF_002077945.1 |
| WP_081336246.1 | LRR-repeats+AP-GTPase+COR*→                                                                          | LRR-repeats+AP-GTPase+COR         | 1380 | -        | Actinobacteria      | Mycobacteroides chelonae       | hypothetical protein [Mycobacteroides chelonae].                                        | GCF_001853965.1 |
| WP_081583858.1 | LRR-repeats→ LRR-repeats+AP-GTPase+COR+CASPASE*→                                                     | LRR-repeats+AP-GTPase+COR+CASPASE | 1375 | -        | Cyanobacteria       | unclassified Tolypothrix       | MULTISPECIES: leucine-rich repeat domain-containing protein [unclassified Tolypothrix]. | GCF_015207145.1 |
| WP_081656227.1 | LRR-repeats+AP-GTPase+COR+TIR*→                                                                      | LRR-repeats+AP-GTPase+COR+TIR     | 1354 | -        | Cyanobacteria       | Fischerella sp. PCC 9431       | leucine-rich repeat domain-containing protein [Fischerella sp. PCC 9431].               | -               |
| WP_081983983.1 | Ferredoxin-RRM→?→ Cluster1494_2clades→  <-?<-?  ?→?→ LRR-repeats+AP-GTPase+COR+DUF4404*→             | LRR-repeats+AP-GTPase+COR+DUF4404 | 971  | -        | Betaproteobacteria  | Massilia sp. JS1662            | GTP-binding protein [Massilia sp. JS1662].                                              | GCF_000759615.1 |
| WP_082167682.1 | LRR-repeats+AP-GTPase+COR+TIR*→  <-?  Cluster850_2clades→                                            | LRR-repeats+AP-GTPase+COR+TIR     | 797  | -        | Alphaproteobacteria | Methylobacterium aquaticum     | TIR domain-containing protein, partial [Methylobacterium aquaticum].                    | GCF_001043915.1 |
| WP_082209748.1 | LRR-repeats+AP-GTPase+COR+TCAD4*→  <-Cluster5_5clades<-?  ?→?→ Pro_CA→                               | LRR-repeats+AP-GTPase+COR+TCAD4   | 714  | -        | Cyanobacteria       | Fischerella sp. PCC 9605       | leucine-rich repeat domain-containing protein [Fischerella sp. PCC 9605].               | GCF_000517105.1 |

| acc            | operon                                                                                                                                         | architecture                      | len  | gen.name | taxend              | species                          | define                                                                            | gca             |
|----------------|------------------------------------------------------------------------------------------------------------------------------------------------|-----------------------------------|------|----------|---------------------|----------------------------------|-----------------------------------------------------------------------------------|-----------------|
| WP_082226537.1 | LRR-repeats→?→ LRR-repeats+AP-GTPase+COR*→  <?<?  ?→  <?<?<?  Aminotran_1_2→                                                                   | LRR-repeats+AP-GTPase+COR         | 1171 | -        | Bacteroidetes       | Microscilla marina               | leucine-rich repeat domain-containing protein [Microscilla marina].               | GCF_000169175.1 |
| WP_083250213.1 | LRR-repeats+AP-GTPase+COR*→                                                                                                                    | LRR-repeats+AP-GTPase+COR         | 817  | -        | Euryarchaeota       | Methanosarcina sp. A14           | leucine-rich repeat domain-containing protein, partial [Methanosarcina sp. A14].  | GCF_001729375.1 |
| WP_083398305.1 | LRR-repeats→ LRR-repeats+AP-GTPase+COR+DrHyd*→?→?→?→?→  <?<-SIG+TM+TM+TM+TM                                                                    | LRR-repeats+AP-GTPase+COR+DrHyd   | 751  | -        | Betaproteobacteria  | Nitrosomonas communis            | hypothetical protein [Nitrosomonas communis].                                     | GCF_900114745.1 |
| WP_083620324.1 | <-SIG+TM+TM+TM+TM+TM+TM+TM<?  LRR-repeats+AP-GTPase+COR*→?→  <-HNH  Cluster1548_2clades→?→  <?  CCTBP→                                         | LRR-repeats+AP-GTPase+COR         | 975  | -        | Cyanobacteria       | Planktothrix paucivesiculata     | leucine-rich repeat domain-containing protein [Planktothrix paucivesiculata].     | GCF_900009265.2 |
| WP_083622583.1 | Cluster1745_2clades→?→?→  <?  ?→ LRR-repeats+AP-GTPase+COR*→                                                                                   | LRR-repeats+AP-GTPase+COR         | 1058 | -        | Cyanobacteria       | Planktothrix paucivesiculata     | leucine-rich repeat domain-containing protein [Planktothrix paucivesiculata].     | GCF_900009265.2 |
| WP_083850172.1 | LRR-repeats+AP-GTPase+COR*→                                                                                                                    | LRR-repeats+AP-GTPase+COR         | 1286 | -        | Deltaproteobacteria | Desulfovibrio sp. U5L            | GTP-binding protein [Desulfovibrio sp. U5L].                                      | -               |
| WP_083886975.1 | <-SIG+TM  ?→  <?<?  LRR-repeats→?→ LRR-repeats+AP-GTPase+COR*→                                                                                 | LRR-repeats+AP-GTPase+COR         | 863  | -        | Cyanobacteria       | Nodosilinea nodulosa             | hypothetical protein [Nodosilinea nodulosa].                                      | GCF_000309385.1 |
| WP_083887059.1 | RelE→ CHTH→ LRR-repeats→ PSE→  <?  PSE→ LRR-repeats+AP-GTPase+COR*→  <?<?  COR+TIR→  <-REase-4                                                 | LRR-repeats+AP-GTPase+COR         | 410  | -        | Cyanobacteria       | Nodosilinea nodulosa             | leucine-rich repeat domain-containing protein [Nodosilinea nodulosa].             | GCF_000309385.1 |
| WP_083887212.1 | Cluster2123_2clades→?→  <?<?<?  PSE→ LRR-repeats→ AP-GTPase*→                                                                                  | AP-GTPase                         | 221  | -        | Cyanobacteria       | Nodosilinea nodulosa             | 50S ribosome-binding GTPase [Nodosilinea nodulosa].                               | GCF_000309385.1 |
| WP_083918254.1 | LRR-repeats+AP-GTPase+COR+TIR*→  <?<?  ?→  <?<?<-SHS2                                                                                          | LRR-repeats+AP-GTPase+COR+TIR     | 954  | -        | Gammaproteobacteria | Methylosarcina fibrata           | TIR domain-containing protein [Methylosarcina fibrata].                           | GCF_000372865.1 |
| WP_084022355.1 | <-NUDIX  ?→  <-HNH<?  ?→?→?→ LRR-repeats+AP-GTPase+COR+TIR*→                                                                                   | LRR-repeats+AP-GTPase+COR+TIR     | 850  | -        | Chlorobi            | Chlorobaculum limnaeum           | TIR domain-containing protein [Chlorobaculum limnaeum].                           | GCF_001747405.1 |
| WP_084172951.1 | LRR-repeats+AP-GTPase+COR*→                                                                                                                    | LRR-repeats+AP-GTPase+COR         | 639  | -        | Cyanobacteria       | Phormidium tenue                 | GTP-binding protein [Phormidium tenue].                                           | GCF_014696675.1 |
| WP_084177732.1 | LRR-repeats+AP-GTPase+COR+TM+TM*→  <-CASPASE+TM                                                                                                | LRR-repeats+AP-GTPase+COR+TM+TM   | 985  | -        | Cyanobacteria       | Nostoc calcicola                 | leucine-rich repeat domain-containing protein [Nostoc calcicola].                 | GCF_001904715.1 |
| WP_084227301.1 | LRR-repeats+AP-GTPase+COR+TIR*→                                                                                                                | LRR-repeats+AP-GTPase+COR+TIR     | 804  | -        | Cyanobacteria       | Nostoc sp. KVJ20                 | leucine-rich repeat domain-containing protein [Nostoc sp. KVJ20].                 | GCF_001712795.1 |
| WP_084428809.1 | LRR-repeats+AP-GTPase+COR*→                                                                                                                    | LRR-repeats+AP-GTPase+COR         | 944  | -        | Actinobacteria      | Kibdelosporangium aridum         | hypothetical protein [Kibdelosporangium aridum].                                  | GCF_900176515.1 |
| WP_084630566.1 | <-HhH-RADC+JAB  ?→ NTP_transf_3→ LRR-repeats+AP-GTPase+COR*→  <?<?  ?→  <?  ?→  <-Cluster1409_2clades                                          | LRR-repeats+AP-GTPase+COR         | 906  | -        | Euryarchaeota       | Methanosarcina lacustris         | leucine-rich repeat domain-containing protein [Methanosarcina lacustris].         | GCF_000970265.1 |
| WP_084713364.1 | LRR-repeats+AP-GTPase+COR*→                                                                                                                    | LRR-repeats+AP-GTPase+COR         | 1355 | -        | Actinobacteria      | Streptacidiphilus jeojiense      | leucine-rich repeat domain-containing protein [Streptacidiphilus jeojiense].      | -               |
| WP_084763145.1 | Pentapeptide-repeats→  <-TPR+nSTAND1+BetaPropeller_WD40+BetaPropeller_WD40<?  ?→  <?  ?→  <?  LRR-repeats+AP-GTPase+COR+CASPASE*→  <-RelE-ParE | LRR-repeats+AP-GTPase+COR+CASPASE | 1441 | -        | Cyanobacteria       | [Scytonema hofmanni] UTEX B 1581 | leucine-rich repeat domain-containing protein [[Scytonema hofmanni] UTEX B 1581]. | GCF_000582685.1 |
| WP_084765096.1 | LRR-repeats+AP-GTPase+COR*→                                                                                                                    | LRR-repeats+AP-GTPase+COR         | 940  | -        | Firmicutes          | Clostridium intestinale          | GTP-binding protein [Clostridium intestinale].                                    | -               |
| WP_084967529.1 | Cluster1877_2clades→  <?  Cluster1140_2clades→?→ LRR-repeats+AP-GTPase+COR+TM+TM*→                                                             | LRR-repeats+AP-GTPase+COR+TM+TM   | 830  | -        | Gammaproteobacteria | Pseudomonas putida               | GTP-binding protein [Pseudomonas putida].                                         | GCF_002094785.1 |







| acc            | operon                                                                                           | architecture                      | len  | gen.name | taxend              | species                                            | define                                                                                              | gca             |
|----------------|--------------------------------------------------------------------------------------------------|-----------------------------------|------|----------|---------------------|----------------------------------------------------|-----------------------------------------------------------------------------------------------------|-----------------|
| WP_091435026.1 | <-Cluster1070_2clades<-ENDO3+NUDIX  HU-IHF→?→ LRR-repeats+AP-GTPase+COR*→                        | LRR-repeats+AP-GTPase+COR         | 916  | -        | Bacteroidetes       | Flavobacterium degerlachei                         | leucine-rich repeat domain-containing protein [Flavobacterium degerlachei].                         | GCF_900106645.1 |
| WP_091506051.1 | Cluster944_3clades→  <-?<-?  ?→  <-Cluster2045_2clades<-?  LRR-repeats+AP-GTPase+COR+TIR*→       | LRR-repeats+AP-GTPase+COR+TIR     | 997  | -        | Bacteroidetes       | Flexibacter flexilis                               | leucine-rich repeat domain-containing protein [Flexibacter flexilis].                               | GCF_900112255.1 |
| WP_091630534.1 | <-ABC-ATPase  ?→ LRR-repeats+AP-GTPase+COR*→  <-ABC_membrane+ABC_tran                            | LRR-repeats+AP-GTPase+COR         | 901  | -        | Actinobacteria      | Micromonospora peucetia                            | leucine-rich repeat domain-containing protein [Micromonospora peucetia].                            | GCF_900091625.1 |
| WP_092162518.1 | REC→ REC→?→?→?→ LRR-repeats+AP-GTPase+COR*→?→?→ SIG+WWE→?→?→ ABC-ATPase→ ABC-ATPase→             | LRR-repeats+AP-GTPase+COR         | 863  | -        | Deltaproteobacteria | Maridesulfovibrio ferrireducens                    | GTP-binding protein [Maridesulfovibrio ferrireducens].                                              | GCF_900101105.1 |
| WP_093066920.1 | LRR-repeats+AP-GTPase+COR+TIR*→?→?→  <-Thioredoxin  YBAK→                                        | LRR-repeats+AP-GTPase+COR+TIR     | 847  | -        | Gammaproteobacteria | Thiothrix caldifontis                              | TIR domain-containing protein [Thiothrix caldifontis].                                              | GCF_900107695.1 |
| WP_093070768.1 | LRR-repeats+AP-GTPase+COR+TIR*→                                                                  | LRR-repeats+AP-GTPase+COR+TIR     | 1327 | -        | Gammaproteobacteria | Thiothrix caldifontis                              | leucine-rich repeat domain-containing protein [Thiothrix caldifontis].                              | GCF_900107695.1 |
| WP_094331224.1 | Cluster1074_2clades→?→ LRR-repeats+AP-GTPase+COR+DUF4404*→  <-PSE<-?  ?→?→ SAM-methylase→        | LRR-repeats+AP-GTPase+COR+DUF4404 | 1016 | -        | Cyanobacteria       | Nostoc sp. 'Peltigera membranacea cyanobiont' 213  | leucine-rich repeat domain-containing protein [Nostoc sp. 'Peltigera membranacea cyanobiont' 213].  | GCF_002245975.1 |
| WP_094342929.1 | <-Arginase<-?  ?→ LRR-repeats+AP-GTPase+COR+TIR*→?→  <-?<-?<-ABC_membrane+ABC_tran               | LRR-repeats+AP-GTPase+COR+TIR     | 1126 | -        | Cyanobacteria       | Nostoc sp. 'Peltigera membranacea cyanobiont' 232  | leucine-rich repeat domain-containing protein [Nostoc sp. 'Peltigera membranacea cyanobiont' 232].  | GCF_002245985.1 |
| WP_094343165.1 | LRR-repeats+AP-GTPase+COR+TIR*→?→  <-?<-TIR<-?<-SIG+NUDIX                                        | LRR-repeats+AP-GTPase+COR+TIR     | 1023 | -        | Cyanobacteria       | Nostoc sp. 'Peltigera membranacea cyanobiont' 232  | leucine-rich repeat domain-containing protein [Nostoc sp. 'Peltigera membranacea cyanobiont' 232].  | GCF_002245985.1 |
| WP_094350322.1 | LRR-repeats+AP-GTPase+COR*→?→?→  <-ABhydrolase<-Cluster1087_2clades                              | LRR-repeats+AP-GTPase+COR         | 1217 | -        | Cyanobacteria       | Nostoc sp. 'Peltigera membranacea cyanobiont' 210A | leucine-rich repeat domain-containing protein [Nostoc sp. 'Peltigera membranacea cyanobiont' 210A]. | GCF_002246015.1 |
| WP_094350573.1 | LRR-repeats+AP-GTPase+COR+DUF4404*→ REC→                                                         | LRR-repeats+AP-GTPase+COR+DUF4404 | 1154 | -        | Cyanobacteria       | Nostoc sp. 'Peltigera membranacea cyanobiont' 210A | leucine-rich repeat domain-containing protein [Nostoc sp. 'Peltigera membranacea cyanobiont' 210A]. | GCF_002246015.1 |
| WP_094350736.1 | LRR-repeats+AP-GTPase+COR*→                                                                      | LRR-repeats+AP-GTPase+COR         | 996  | -        | Cyanobacteria       | Nostoc sp. 'Peltigera membranacea cyanobiont' 210A | leucine-rich repeat domain-containing protein [Nostoc sp. 'Peltigera membranacea cyanobiont' 210A]. | -               |
| WP_094350925.1 | <-TPR+TPR<-?  ?→?→ ABhydrolase→?→  <-?  LRR-repeats+AP-GTPase+COR+TIR*→  <-?<-?<-?<-?<-SIG+NUDIX | LRR-repeats+AP-GTPase+COR+TIR     | 1078 | -        | Cyanobacteria       | Nostoc sp. 'Peltigera membranacea cyanobiont' 210A | leucine-rich repeat domain-containing protein [Nostoc sp. 'Peltigera membranacea cyanobiont' 210A]. | GCF_002246015.1 |
| WP_094408510.1 | <-ABC-ATPase  ICLR-HTH→ LRR-repeats+AP-GTPase+COR+TIR*→  <-SIG+TM+TM+TM+TM+TM+TM+TM+TM           | LRR-repeats+AP-GTPase+COR+TIR     | 974  | -        | Alphaproteobacteria | Elstera cyanobacteriorum                           | leucine-rich repeat domain-containing protein [Elstera cyanobacteriorum].                           | GCF_014643715.1 |
| WP_094530685.1 | LRR-repeats+AP-GTPase+COR*→  <-PSE  ?→?→?→  <-ABC-ATPase<-ABC-ATPase<-SIG+TM+TM+TM+TM+TM+TM+TM   | LRR-repeats+AP-GTPase+COR         | 1019 | -        | Cyanobacteria       | Pseudanabaena sp. SR411                            | leucine-rich repeat domain-containing protein [Pseudanabaena sp. SR411].                            | GCF_002251945.1 |

| acc            | operon                                                                                                          | architecture                      | len  | gen.name | taxend        | species                        | define                                                                           | gca             |
|----------------|-----------------------------------------------------------------------------------------------------------------|-----------------------------------|------|----------|---------------|--------------------------------|----------------------------------------------------------------------------------|-----------------|
| WP_094533976.1 | Cluster54_3clades→ Cluster1093_2clades→ LRR-repeats+AP-GTPase+COR+TM+TM*→                                       | LRR-repeats+AP-GTPase+COR+TM+TM   | 1051 | -        | Cyanobacteria | Pseudanabaena sp. SR411        | leucine-rich repeat domain-containing protein [Pseudanabaena sp. SR411].         | GCF_002251945.1 |
| WP_095644020.1 | LRR-repeats+AP-GTPase+COR*→                                                                                     | LRR-repeats+AP-GTPase+COR         | 774  | -        | Euryarchaeota | Methanosarcina spelaei         | leucine-rich repeat domain-containing protein, partial [Methanosarcina spelaei]. | GCF_002287235.1 |
| WP_095644584.1 | LRR-repeats+AP-GTPase+COR*→                                                                                     | LRR-repeats+AP-GTPase+COR         | 877  | -        | Euryarchaeota | Methanosarcina spelaei         | leucine-rich repeat domain-containing protein [Methanosarcina spelaei].          | GCF_002287235.1 |
| WP_096193484.1 | LRR-repeats+AP-GTPase+COR+TIR*→?→  <-FAD-NAD-dep-oxidoreductase<-?<-?<-RNA-Helicase                             | LRR-repeats+AP-GTPase+COR+TIR     | 1173 | -        | Bacteroidetes | Cytophagales bacterium TFI 002 | leucine-rich repeat domain-containing protein [Cytophagales bacterium TFI 002].  | -               |
| WP_096535168.1 | LRR-repeats+AP-GTPase+COR*→  <-ClpABN-AAA+ClpABC-AAA<-?  METHYLASE→                                             | LRR-repeats+AP-GTPase+COR         | 1018 | -        | Cyanobacteria | Nostoc linckia                 | leucine-rich repeat domain-containing protein [Nostoc linckia].                  | GCF_002368035.1 |
| WP_096538729.1 | <-Pkinase+Pentapeptide<-?<-?  ?→  <-?  ?→ LRR-repeats+AP-GTPase+COR+TIR*→                                       | LRR-repeats+AP-GTPase+COR+TIR     | 1033 | -        | Cyanobacteria | Nostoc linckia                 | leucine-rich repeat domain-containing protein [Nostoc linckia].                  | GCF_002368035.1 |
| WP_096538739.1 | LRR-repeats+AP-GTPase+COR+TIR*→?→  <-?  ?→?→?→ RPN10→                                                           | LRR-repeats+AP-GTPase+COR+TIR     | 1115 | -        | Cyanobacteria | Nostoc linckia                 | leucine-rich repeat domain-containing protein [Nostoc linckia].                  | GCF_002368035.1 |
| WP_096551538.1 | LRR-repeats+AP-GTPase+COR*→                                                                                     | LRR-repeats+AP-GTPase+COR         | 818  | -        | Cyanobacteria | Nostoc sp. NIES-4103           | leucine-rich repeat domain-containing protein [Nostoc sp. NIES-4103].            | GCF_002368335.1 |
| WP_096566542.1 | HNH→ PSE→ LRR-repeats+AP-GTPase+COR*→?→?→?→  <-?  ?→  <-?  PAIREDC-HTH→                                         | LRR-repeats+AP-GTPase+COR         | 1268 | -        | Cyanobacteria | Scytonema sp. NIES-4073        | leucine-rich repeat protein [Scytonema sp. NIES-4073].                           | GCF_002368435.1 |
| WP_096579899.1 | <-DSBH<-?<-?<-?<-ParA-Soj-PloopNTase<-?  Cluster5_5clades→ LRR-repeats+AP-GTPase+COR+DUF4404*→                  | LRR-repeats+AP-GTPase+COR+DUF4404 | 1153 | -        | Cyanobacteria | Anabaenopsis circularis        | leucine-rich repeat domain-containing protein [Anabaenopsis circularis].         | GCF_002367975.1 |
| WP_096585603.1 | HISKIN→  <-?<-?  LRR-repeats+AP-GTPase+COR*→                                                                    | LRR-repeats+AP-GTPase+COR         | 937  | -        | Cyanobacteria | Anabaenopsis circularis        | leucine-rich repeat domain-containing protein [Anabaenopsis circularis].         | GCF_002367975.1 |
| WP_096586956.1 | <-ABC-ATPase  ?→ Pkinase+TM→ Chromo-N+CHROMO→  <-?  LRR-repeats+AP-GTPase+COR+CASPASE*→  <-?<-?  Aminotran_1_2→ | LRR-repeats+AP-GTPase+COR+CASPASE | 1148 | -        | Cyanobacteria | Calothrix sp. NIES-2098        | leucine-rich repeat domain-containing protein [Calothrix sp. NIES-2098].         | GCF_002368175.1 |
| WP_096588412.1 | LRR-repeats+AP-GTPase+COR*→ TPR-repeats+CASPASE→                                                                | LRR-repeats+AP-GTPase+COR         | 1066 | -        | Cyanobacteria | Calothrix sp. NIES-2098        | leucine-rich repeat domain-containing protein [Calothrix sp. NIES-2098].         | GCF_002368175.1 |
| WP_096598125.1 | LRR-repeats+AP-GTPase+COR+DUF4404*→?→  <-?  ?→  <-RelE-ParE                                                     | LRR-repeats+AP-GTPase+COR+DUF4404 | 1134 | -        | Cyanobacteria | Calothrix sp. NIES-2100        | leucine-rich repeat domain-containing protein [Calothrix sp. NIES-2100].         | GCF_002368195.1 |
| WP_096598883.1 | SIG+TM→?→ tRNA→  <-?  LRR-repeats+AP-GTPase+COR+CASPASE*→  <-PSE<-?  ?→?→  <-?<-?<-Acyolphosphatase             | LRR-repeats+AP-GTPase+COR+CASPASE | 1108 | -        | Cyanobacteria | Calothrix sp. NIES-2100        | leucine-rich repeat domain-containing protein [Calothrix sp. NIES-2100].         | GCF_002368195.1 |
| WP_096598950.1 | LRR-repeats+AP-GTPase+COR+TM+TM*→  <-?  ?→  <-REC                                                               | LRR-repeats+AP-GTPase+COR+TM+TM   | 929  | -        | Cyanobacteria | Calothrix sp. NIES-2100        | leucine-rich repeat domain-containing protein [Calothrix sp. NIES-2100].         | GCF_002368195.1 |
| WP_096621624.1 | LRR-repeats→ PSE→ LRR-repeats+AP-GTPase+COR+CASPASE*→                                                           | LRR-repeats+AP-GTPase+COR+CASPASE | 981  | -        | Cyanobacteria | Microchaete diplosiphon        | CHAT domain-containing protein [Microchaete diplosiphon].                        | GCF_002368275.1 |
| WP_096658516.1 | LRR-repeats+AP-GTPase+COR*→ PSE→?→  <-?  ?→  <-?  ?→  <-?<-Pentapeptide-repeats                                 | LRR-repeats+AP-GTPase+COR         | 708  | -        | Cyanobacteria | Calothrix parasitica           | leucine-rich repeat domain-containing protein [Calothrix parasitica].            | GCF_002368095.1 |







| acc            | operon                                                                                            | architecture                      | len  | gen.name | taxend              | species                              | define                                                                                       | gca             |
|----------------|---------------------------------------------------------------------------------------------------|-----------------------------------|------|----------|---------------------|--------------------------------------|----------------------------------------------------------------------------------------------|-----------------|
| WP_106289057.1 | LRR-repeats+AP-GTPase+COR+DUF4404*→                                                               | LRR-repeats+AP-GTPase+COR+DUF4404 | 918  | -        | Cyanobacteria       | Merismopedia glauca                  | leucine-rich repeat domain-containing protein [Merismopedia glauca].                         | GCF_003003775.1 |
| WP_106331563.1 | TPR-repeats→?→?→?→ tRNA→  <-PSE<-?  Cluster53_2clades→?→ LRR-repeats+AP-GTPase+COR+DUF4404*→      | LRR-repeats+AP-GTPase+COR+DUF4404 | 1048 | -        | Cyanobacteria       | filamentous cyanobacterium Phorm 6   | leucine-rich repeat domain-containing protein [filamentous cyanobacterium Phorm 6].          | -               |
| WP_106333130.1 | LRR-repeats+AP-GTPase+COR+DUF4404*→?→?→  <-?<-?<-?<-RelE-ParE                                     | LRR-repeats+AP-GTPase+COR+DUF4404 | 786  | -        | Cyanobacteria       | filamentous cyanobacterium Phorm 6   | leucine-rich repeat domain-containing protein, partial [filamentous cyanobacterium Phorm 6]. | -               |
| WP_106364139.1 | <-ABC-ATPase  ?→?→ LRR-repeats+AP-GTPase+COR*→                                                    | LRR-repeats+AP-GTPase+COR         | 1146 | -        | Actinobacteria      | Glycomyces artemisiae                | hypothetical protein [Glycomyces artemisiae].                                                | GCF_003002955.1 |
| WP_106623442.1 | LRR-repeats+AP-GTPase+COR+TM+TM*→  <-ABC-ATPase                                                   | LRR-repeats+AP-GTPase+COR+TM+TM   | 970  | -        | Bacteroidetes       | Sphingobacteriales bacterium UPWRP_1 | leucine-rich repeat domain-containing protein [Sphingobacteriales bacterium UPWRP_1].        | -               |
| WP_106872506.1 | RelE-ParE→ LRR-repeats+AP-GTPase+COR+TIR*→                                                        | LRR-repeats+AP-GTPase+COR+TIR     | 1126 | -        | Cyanobacteria       | unclassified Cyanobacteria           | MULTISPECIES: leucine-rich repeat domain-containing protein [unclassified Cyanobacteria].    | -               |
| WP_106922429.1 | LRR-repeats+AP-GTPase+COR+TIR*→  <-REase-4                                                        | LRR-repeats+AP-GTPase+COR+TIR     | 826  | -        | Cyanobacteria       | filamentous cyanobacterium CCP3      | leucine-rich repeat domain-containing protein [filamentous cyanobacterium CCP3].             | -               |
| WP_107346265.1 | Arginase→?→  <-?  ?→ LRR-repeats+AP-GTPase+COR+TIR*→  <-?<-?<-?<-ABC-ATPase  ?→ REC→              | LRR-repeats+AP-GTPase+COR+TIR     | 1173 | -        | Alphaproteobacteria | Rhodopseudomonas palustris           | leucine-rich repeat domain-containing protein [Rhodopseudomonas palustris].                  | GCF_003031265.1 |
| WP_107357189.1 | Arginase→?→  <-?  ?→ LRR-repeats+AP-GTPase+COR+TIR*→  <-?<-?<-?<-ABC-ATPase  ?→ REC→              | LRR-repeats+AP-GTPase+COR+TIR     | 1173 | -        | Alphaproteobacteria | Rhodopseudomonas palustris           | leucine-rich repeat domain-containing protein [Rhodopseudomonas palustris].                  | GCF_003031245.1 |
| WP_107867044.1 | LRR-repeats+AP-GTPase+COR+GT4*→                                                                   | LRR-repeats+AP-GTPase+COR+GT4     | 1510 | -        | Firmicutes          | Agitococcus lubricus                 | leucine-rich repeat protein [Agitococcus lubricus].                                          | GCF_003051055.1 |
| WP_108091428.1 | ABC_membrane+ABC_tran→  <-?  CI→ LRR-repeats+AP-GTPase+COR+TIR*→                                  | LRR-repeats+AP-GTPase+COR+TIR     | 1243 | -        | Gammaproteobacteria | Vibrio splendidus                    | TIR domain-containing protein [Vibrio splendidus].                                           | GCF_003050005.1 |
| WP_108099554.1 | <-Cluster1756_2clades<-?<-?<-?<-?  ?→?→ LRR-repeats+AP-GTPase+COR*→                               | LRR-repeats+AP-GTPase+COR         | 1107 | -        | Gammaproteobacteria | Vibrio splendidus                    | 50S ribosome-binding GTPase [Vibrio splendidus].                                             | GCF_003050165.1 |
| WP_108112883.1 | <-HISKIN<-?  LRR-repeats+AP-GTPase+COR+TIR*→  <-HISKIN<-HISKIN                                    | LRR-repeats+AP-GTPase+COR+TIR     | 973  | -        | Bacteroidetes       | Kordia periserrulae                  | leucine-rich repeat domain-containing protein [Kordia periserrulae].                         | GCF_003054265.1 |
| WP_108114870.1 | CHTH→  <-?<-?  RNA-Helicase→?→?→  <-?  LRR-repeats+AP-GTPase+COR+TIR*→  <-?<-?<-?  ?→  <-TM+TM+TM | LRR-repeats+AP-GTPase+COR+TIR     | 1012 | -        | Bacteroidetes       | Kordia periserrulae                  | leucine-rich repeat domain-containing protein [Kordia periserrulae].                         | GCF_003054265.1 |
| WP_108176265.1 | LRR-repeats+AP-GTPase+COR*→?→ ABC_membrane+ABC_tran→ ABC_membrane+ABC_tran→                       | LRR-repeats+AP-GTPase+COR         | 1122 | -        | Gammaproteobacteria | Vibrio splendidus                    | hypothetical protein [Vibrio splendidus].                                                    | GCF_003050125.1 |
| WP_108207948.1 | REC→?→?→?→  <-ABC_membrane+ABC_tran<-ABC_membrane+ABC_tran<-?  LRR-repeats+AP-GTPase+COR*→        | LRR-repeats+AP-GTPase+COR         | 960  | -        | Gammaproteobacteria | Vibrio splendidus                    | leucine-rich repeat domain-containing protein [Vibrio splendidus].                           | GCF_003050345.1 |
| WP_108801834.1 | <-REC<-?  LRR-repeats+AP-GTPase+COR+TM+TM*→?→?→?→?→  <-?<-SIG+TM+TM+TM+HISKIN                     | LRR-repeats+AP-GTPase+COR+TM+TM   | 1086 | -        | Bacteroidetes       | Aquimarina sp. Aq107                 | leucine-rich repeat domain-containing protein [Aquimarina sp. Aq107].                        | GCF_900299505.1 |
| WP_109009086.1 | ABhydrolase→?→  <-PSE  LRR-repeats+AP-GTPase+COR+TIR*→  <-?<-?<-?<-?<-SIG+NUDIX                   | LRR-repeats+AP-GTPase+COR+TIR     | 1078 | -        | Cyanobacteria       | Nostoc commune                       | leucine-rich repeat domain-containing protein [Nostoc commune].                              | GCF_003113895.1 |

| acc            | operon                                                                                                                                                                                           | architecture                      | len  | gen.name | taxend              | species                          | define                                                                            | gca             |
|----------------|--------------------------------------------------------------------------------------------------------------------------------------------------------------------------------------------------|-----------------------------------|------|----------|---------------------|----------------------------------|-----------------------------------------------------------------------------------|-----------------|
| WP_109322545.1 | LRR-repeats+AP-GTPase+COR*→?→?→ Cluster978_2clades→                                                                                                                                              | LRR-repeats+AP-GTPase+COR         | 841  | -        | Bacteroidetes       | Allopeudarcicella aquatilis      | hypothetical protein [Allopeudarcicella aquatilis].                               | GCF_003143535.1 |
| WP_109617479.1 | LRR-repeats+AP-GTPase+COR*→                                                                                                                                                                      | LRR-repeats+AP-GTPase+COR         | 1124 | -        | Bacteroidetes       | Chryseobacterium oncorhynchi     | leucine-rich repeat domain-containing protein [Chryseobacterium oncorhynchi].     | GCF_002899895.1 |
| WP_109694822.1 | LRR-repeats+AP-GTPase+COR+TIR*→                                                                                                                                                                  | LRR-repeats+AP-GTPase+COR+TIR     | 1143 | -        | Bacteroidetes       | Chitinophaga deserti             | TIR domain-containing protein [Chitinophaga deserti].                             | -               |
| WP_110392243.1 | ABC-ATPase→?→ LRR-repeats+AP-GTPase+COR+TIR*→                                                                                                                                                    | LRR-repeats+AP-GTPase+COR+TIR     | 1128 | -        | Betaproteobacteria  | Rivicola pingtungensis           | leucine-rich repeat domain-containing protein [Rivicola pingtungensis].           | GCF_003201855.1 |
| WP_110578614.1 | SIG+TM+TM+TM+TM+TM+TM+TM→  <-PSE  Mbetalac→ SAM-methylase→?→  <-?<-SIG+TPM_phosphatase+TM+TM+TM  LRR-repeats+AP-GTPase+COR+TM+TM*→  <-?<-?<-?<-Pro_CA  ?→  <-?<-tRNA<-tRNA<-Ferredoxin-betagrasp | LRR-repeats+AP-GTPase+COR+TM+TM   | 865  | -        | Cyanobacteria       | Microcystis aeruginosa           | leucine-rich repeat domain-containing protein [Microcystis aeruginosa].           | GCF_003206555.1 |
| WP_110984619.1 | <-Cluster1569_2clades  Mbetalac→  <-?<-?  ?→ Mbetalac→  <-?  LRR-repeats+AP-GTPase+COR*→?→ PIN→  <-Cluster1559_2clades                                                                           | LRR-repeats+AP-GTPase+COR         | 995  | -        | Cyanobacteria       | Acaryochloris sp. RCC1774        | leucine-rich repeat domain-containing protein [Acaryochloris sp. RCC1774].        | -               |
| WP_111129223.1 | LRR-repeats+AP-GTPase+COR*→                                                                                                                                                                      | LRR-repeats+AP-GTPase+COR         | 894  | -        | Bacteroidetes       | Mesonina sp. K7                  | 50S ribosome-binding GTPase [Mesonia sp. K7].                                     | GCF_003233725.1 |
| WP_111283162.1 | LRR-repeats+AP-GTPase+COR*→  <-?  ?→?→  <-?  ?→?→  <-cNMPBD                                                                                                                                      | LRR-repeats+AP-GTPase+COR         | 1144 | -        | Bacteroidetes       | Flavobacterium ginsenosidimutans | leucine-rich repeat domain-containing protein [Flavobacterium ginsenosidimutans]. | GCF_003254625.1 |
| WP_111625904.1 | LRR-repeats+AP-GTPase+COR*→                                                                                                                                                                      | LRR-repeats+AP-GTPase+COR         | 846  | -        | Bacteroidetes       | Gelidibacter algens              | hypothetical protein [Gelidibacter algens].                                       | GCF_003259265.1 |
| WP_111845807.1 | LRR-repeats+AP-GTPase+COR*→                                                                                                                                                                      | LRR-repeats+AP-GTPase+COR         | 812  | -        | Bacteroidetes       | Aequorivita antarctica           | hypothetical protein, partial [Aequorivita antarctica].                           | -               |
| WP_112086237.1 | LRR-repeats+AP-GTPase+COR*→                                                                                                                                                                      | LRR-repeats+AP-GTPase+COR         | 847  | -        | Bacteroidetes       | Flavobacterium lacus             | hypothetical protein [Flavobacterium lacus].                                      | GCF_003268815.1 |
| WP_112134132.1 | LRR-repeats+AP-GTPase+COR*→?→  <-?<-?<-?<-REC<-HISKIN                                                                                                                                            | LRR-repeats+AP-GTPase+COR         | 1186 | -        | Actinobacteria      | Glycomyces dulcitolivorans       | leucine-rich repeat domain-containing protein [Glycomyces dulcitolivorans].       | GCF_003265355.1 |
| WP_112263949.1 | wHTH-4stranded+TPRs+APATPase+TPR-repeats→?→?→?→ ABC_membrane+ABC_tran→?→?→ LRR-repeats+AP-GTPase+COR*→ COR→                                                                                      | LRR-repeats+AP-GTPase+COR         | 608  | -        | Actinobacteria      | Lentzea terrae                   | leucine-rich repeat domain-containing protein [Lentzea terrae].                   | GCF_003265345.1 |
| WP_114082655.1 | Cluster5_5clades→ LRR-repeats+AP-GTPase+COR+TM+TM*→  <-CASPASE+TM                                                                                                                                | LRR-repeats+AP-GTPase+COR+TM+TM   | 904  | -        | Cyanobacteria       | Nostoc sp. ATCC 53789            | leucine-rich repeat domain-containing protein [Nostoc sp. ATCC 53789].            | GCF_003326245.1 |
| WP_114084090.1 | Pentapeptide-repeats→  <-?<-?  ?→?→  <-Arginase<-?  LRR-repeats+AP-GTPase+COR+TIR*→?→  <-?  ?→?→?→?→ APATPase+TPR+TPR+TPR→                                                                       | LRR-repeats+AP-GTPase+COR+TIR     | 802  | -        | Cyanobacteria       | Nostoc sp. ATCC 53789            | leucine-rich repeat domain-containing protein [Nostoc sp. ATCC 53789].            | GCF_003326245.1 |
| WP_114085324.1 | ABhydrolase→?→  <-?  LRR-repeats+AP-GTPase+COR+TIR*→  <-?<-?<-?<-SIG+NUDIX                                                                                                                       | LRR-repeats+AP-GTPase+COR+TIR     | 1069 | -        | Cyanobacteria       | Nostoc sp. ATCC 53789            | leucine-rich repeat domain-containing protein [Nostoc sp. ATCC 53789].            | GCF_003326245.1 |
| WP_114085448.1 | LRR-repeats+AP-GTPase+COR+CASPASE*→?→?→?→ ParA-Soj-PloopNTPase→                                                                                                                                  | LRR-repeats+AP-GTPase+COR+CASPASE | 1512 | -        | Cyanobacteria       | Nostoc sp. ATCC 53789            | leucine-rich repeat domain-containing protein [Nostoc sp. ATCC 53789].            | GCF_003326245.1 |
| WP_114085638.1 | <-ParA-Soj-PloopNTPase  LRR-repeats+AP-GTPase+COR*→                                                                                                                                              | LRR-repeats+AP-GTPase+COR         | 881  | -        | Cyanobacteria       | Nostoc sp. ATCC 53789            | hypothetical protein [Nostoc sp. ATCC 53789].                                     | GCF_009873495.1 |
| WP_114460382.1 | Cluster1398_2clades→?→ LRR-repeats+AP-GTPase*→                                                                                                                                                   | LRR-repeats+AP-GTPase             | 477  | -        | Bacteroidetes       | Runella sp. YX9                  | leucine-rich repeat domain-containing protein [Runella sp. YX9].                  | GCF_003339505.1 |
| WP_114694555.1 | SIGMA-HTH→?→  <-?  ?→?→ LRR-repeats+AP-GTPase+COR*→                                                                                                                                              | LRR-repeats+AP-GTPase+COR         | 865  | -        | Gammaproteobacteria | Motiliproteus coralliicola       | GTP-binding protein [Motiliproteus coralliicola].                                 | GCF_003345655.1 |



| acc            | operon                                                                                                                                               | architecture                    | len  | gen.name | taxend         | species                                    | define                                                                                      | gca             |
|----------------|------------------------------------------------------------------------------------------------------------------------------------------------------|---------------------------------|------|----------|----------------|--------------------------------------------|---------------------------------------------------------------------------------------------|-----------------|
| WP_114902638.1 | LRR-repeats+AP-GTPase+COR+DrHyd*→                                                                                                                    | LRR-repeats+AP-GTPase+COR+DrHyd | 890  | -        | Bacteroidetes  | Kordia sp. SMS9                            | leucine-rich repeat domain-containing protein [Kordia sp. SMS9].                            | GCF_003352465.1 |
| WP_114902899.1 | REC→  <?  ?→ LRR-repeats+AP-GTPase+COR+TIR*→  <-RADICAL-SAM<-?<-?<-SIGMA-HTH                                                                         | LRR-repeats+AP-GTPase+COR+TIR   | 972  | -        | Bacteroidetes  | Kordia sp. SMS9                            | leucine-rich repeat domain-containing protein [Kordia sp. SMS9].                            | GCF_003352465.1 |
| WP_114904001.1 | LRR-repeats+AP-GTPase+COR+TIR*→                                                                                                                      | LRR-repeats+AP-GTPase+COR+TIR   | 947  | -        | Bacteroidetes  | Kordia sp. SMS9                            | leucine-rich repeat domain-containing protein [Kordia sp. SMS9].                            | GCF_003352465.1 |
| WP_115919083.1 | LRR-repeats+AP-GTPase+COR+TIR*→?→?→ PSE→?→  <-?<-tRNA  ?→ REC→                                                                                       | LRR-repeats+AP-GTPase+COR+TIR   | 1186 | -        | Bacteroidetes  | Chryseobacterium rhizosphaerae             | TIR domain-containing protein [Chryseobacterium rhizosphaerae].                             | GCF_007991415.1 |
| WP_116754014.1 | LRR-repeats+AP-GTPase+COR*→  <-?<-Cluster1163_3clades                                                                                                | LRR-repeats+AP-GTPase+COR       | 857  | -        | Bacteroidetes  | Flavobacterium sp. HTF                     | leucine-rich repeat domain-containing protein, partial [Flavobacterium sp. HTF].            | GCF_003105115.1 |
| WP_116856563.1 | <-Cluster1512_2clades  ?→?→?→ LRR-repeats+AP-GTPase+COR+TIR*→?→?→?→  <-?<-cNMPBD                                                                     | LRR-repeats+AP-GTPase+COR+TIR   | 1040 | -        | Bacteroidetes  | Chitinophaga silvisoli                     | TIR domain-containing protein [Chitinophaga silvisoli].                                     | GCF_003412465.1 |
| WP_116857273.1 | LRR-repeats+AP-GTPase+COR+TIR→ LRR-repeats+AP-GTPase+COR+TIR→  <-?<-?<-SIGMA-HTH<-SIGMA-HTH  ?→ LRR-repeats+AP-GTPase+COR+TIR*→  <-SIG+ABhydrolase   | LRR-repeats+AP-GTPase+COR+TIR   | 1390 | -        | Bacteroidetes  | Chitinophaga silvisoli                     | leucine-rich repeat domain-containing protein [Chitinophaga silvisoli].                     | GCF_003412465.1 |
| WP_116857280.1 | LRR-repeats+AP-GTPase+COR_TIR*→                                                                                                                      | LRR-repeats+AP-GTPase+COR_TIR   | 1378 | -        | Bacteroidetes  | Chitinophaga silvisoli                     | leucine-rich repeat domain-containing protein [Chitinophaga silvisoli].                     | GCF_003412465.1 |
| WP_116857281.1 | LRR-repeats+AP-GTPase+COR+TIR*→                                                                                                                      | LRR-repeats+AP-GTPase+COR+TIR   | 1379 | -        | Bacteroidetes  | Chitinophaga silvisoli                     | leucine-rich repeat domain-containing protein [Chitinophaga silvisoli].                     | GCF_003412465.1 |
| WP_116982533.1 | PNPase→?→?→?→?→ LRR-repeats+AP-GTPase+COR+TIR*→                                                                                                      | LRR-repeats+AP-GTPase+COR+TIR   | 956  | -        | Bacteroidetes  | Emticicia sp. C21                          | leucine-rich repeat domain-containing protein [Emticicia sp. C21].                          | GCF_003418935.1 |
| WP_117208282.1 | <-Aminotran_1_2<-?  ?→  <-?  ?→?→ LRR-repeats+AP-GTPase+COR*→  <-?<-?<-?<-?<-Cluster2179_2clades<-SIG+TM+TM+TM+TM+TM+TM+TM+TM+TM+TM+TM+TM            | LRR-repeats+AP-GTPase+COR       | 905  | -        | Actinobacteria | Allorhizocola rhizosphaerae                | hypothetical protein [Allorhizocola rhizosphaerae].                                         | GCF_003426775.1 |
| WP_117882884.1 | REC→  <-?<-?<-?<-?  MORC→?→ LRR-repeats+AP-GTPase+COR*→?→ Cluster1438_2clades→                                                                       | LRR-repeats+AP-GTPase+COR       | 797  | -        | Bacteroidetes  | Lutibacter sp. SM1352                      | GTP-binding protein [Lutibacter sp. SM1352].                                                | GCF_003449015.1 |
| WP_118170224.1 | Cluster5_5clades→ Cluster5_5clades→  <-?  LRR-repeats+AP-GTPase+COR+TM+TM*→  <-CASPASE+TM  ?→  <-?<-?  ?→  <-?  Cluster1756_2clades→                 | LRR-repeats+AP-GTPase+COR+TM+TM | 962  | -        | Cyanobacteria  | Nostoc sphaeroides                         | leucine-rich repeat domain-containing protein [Nostoc sphaeroides].                         | GCF_003443655.1 |
| WP_118317581.1 | LRR-repeats+AP-GTPase+COR+DrHyd*→                                                                                                                    | LRR-repeats+AP-GTPase+COR+DrHyd | 1169 | -        | Bacteroidetes  | Bacteroidales                              | MULTISPECIES: leucine-rich repeat domain-containing protein [Bacteroidales].                | GCF_902364465.1 |
| WP_118840037.1 | ABC_membrane+ABC_tran→  <-Cluster2290_2clades<-Cluster2428_2clades<-?<-DSBH<-?  ClpABN-AAA+ClpABC-AAA→ LRR-repeats+AP-GTPase+COR*→  <-?<-HISKIN<-REC | LRR-repeats+AP-GTPase+COR       | 1051 | -        | Bacteroidetes  | Salinibacter ruber                         | leucine-rich repeat domain-containing protein [Salinibacter ruber].                         | GCF_003491185.1 |
| WP_119405939.1 | SIG+TM+TM+TM+HISKIN→?→?→  <-?<-PSE  ?→?→ TIR+LRR-repeats+AP-GTPase+TIR*→                                                                             | TIR+LRR-repeats+AP-GTPase+TIR   | 1046 | -        | Bacteroidetes  | Mucilaginibacter sp. HYN0043               | TIR domain-containing protein [Mucilaginibacter sp. HYN0043].                               | GCF_003576455.2 |
| WP_119406030.1 | LRR-repeats+AP-GTPase+COR+TIR*→                                                                                                                      | LRR-repeats+AP-GTPase+COR+TIR   | 885  | -        | Bacteroidetes  | Mucilaginibacter sp. HYN0043               | TIR domain-containing protein [Mucilaginibacter sp. HYN0043].                               | GCF_003576455.2 |
| WP_119756574.1 | LRR-repeats+AP-GTPase+COR*→                                                                                                                          | LRR-repeats+AP-GTPase+COR       | 792  | -        | Bacteroidetes  | Chryseolinea soli                          | GTP-binding protein [Chryseolinea soli].                                                    | GCF_003589925.1 |
| WP_120086745.1 | Cluster2248_2clades→?→?→ LRR-repeats+AP-GTPase+COR*→                                                                                                 | LRR-repeats+AP-GTPase+COR       | 952  | -        | Actinobacteria | Pseudonocardiaaceae bacterium YIM PH 21723 | leucine-rich repeat domain-containing protein [Pseudonocardiaaceae bacterium YIM PH 21723]. | -               |





| acc                                                                                                                             | operon                                                                                                          | architecture                      | len  | gen.name | taxend              | species                      | define                                                                            | gca             |
|---------------------------------------------------------------------------------------------------------------------------------|-----------------------------------------------------------------------------------------------------------------|-----------------------------------|------|----------|---------------------|------------------------------|-----------------------------------------------------------------------------------|-----------------|
| WP_136836096.1                                                                                                                  | LRR-repeats+AP-GTPase+COR+TIR*→                                                                                 | LRR-repeats+AP-GTPase+COR+TIR     | 1357 | -        | Bacteroidetes       | Pedobacter sp. RP-3-15       | leucine-rich repeat domain-containing protein [Pedobacter sp. RP-3-15].           | GCF_005116445.1 |
| WP_136929189.1                                                                                                                  | SIG+TM+TM+TM+TM+TM+TM+TM+TM+TM→ LRR-repeats+AP-GTPase+COR*→                                                     | LRR-repeats+AP-GTPase+COR         | 961  | -        | Deltaproteobacteria | Polyangium fumosum           | GTP-binding protein [Polyangium fumosum].                                         | GCF_005144585.1 |
| WP_137669597.1                                                                                                                  | LRR-repeats+AP-GTPase+COR*→                                                                                     | LRR-repeats+AP-GTPase+COR         | 272  | -        | Cyanobacteria       | Sphaerospermopsis reniformis | GTP-binding protein, partial [Sphaerospermopsis reniformis].                      | GCF_005402885.1 |
| WP_137686407.1                                                                                                                  | LRR-repeats+AP-GTPase+COR*→                                                                                     | LRR-repeats+AP-GTPase+COR         | 1152 | -        | Chloroflexi         | Thermosporothrix hazakensis  | leucine-rich repeat domain-containing protein [Thermosporothrix hazakensis].      | GCF_005402645.1 |
| WP_137908463.1                                                                                                                  | LRR-repeats+AP-GTPase+COR+TM+TM*→  <-PSE  ?→?→  <-PSE<-?  CCTBP→                                                | LRR-repeats+AP-GTPase+COR+TM+TM   | 875  | -        | Cyanobacteria       | Dolichospermum planctonicum  | leucine-rich repeat domain-containing protein [Dolichospermum planctonicum].      | GCF_005402965.1 |
| WP_138500060.1                                                                                                                  | <-Pkinase+Pentapeptide<-?<-?  PSE→  <-?  LRR-repeats+AP-GTPase+COR+TIR*→  <-?<-?<-PSE  ?→  <-?  ?→?→  <-NUDIX   | LRR-repeats+AP-GTPase+COR+TIR     | 920  | -        | Cyanobacteria       | Nostoc sp. PA-18-2419        | leucine-rich repeat domain-containing protein [Nostoc sp. PA-18-2419].            | GCF_005869855.1 |
| WP_138503290.1                                                                                                                  | <-HhH-RADC+JAB  ?→?→  <-?  LRR-repeats→ LRR-repeats+AP-GTPase+COR*→  <-?  ?→?→  <-PSE<-?  ?→?→ PEP-utilisers-C→ | LRR-repeats+AP-GTPase+COR         | 1100 | -        | Cyanobacteria       | Nostoc sp. PA-18-2419        | leucine-rich repeat domain-containing protein [Nostoc sp. PA-18-2419].            | GCF_005869855.1 |
| WP_138504428.k-ABC-ATPase<-?<-?<-?  ?→ TM+TM+TM→ LRR-repeats+AP-GTPase+COR+TIR*→ PSE→  <-PSE<-?  PSE→?→?→  <-SIG+TM+TM+TM+TM+TM | LRR-repeats+AP-GTPase+COR+TIR                                                                                   | LRR-repeats+AP-GTPase+COR+TIR     | 1019 | -        | Bacteroidetes       | Spirosoma lacussanchae       | TIR domain-containing protein [Spirosoma lacussanchae].                           | GCF_005870035.1 |
| WP_138544765.1                                                                                                                  | LRR-repeats+AP-GTPase+COR+TIR*→  <-?<-?<-TM                                                                     | LRR-repeats+AP-GTPase+COR+TIR     | 1128 | -        | Gammaproteobacteria | Pseudoalteromonas rubra      | leucine-rich repeat domain-containing protein [Pseudoalteromonas rubra].          | GCF_005887115.1 |
| WP_138544832.1                                                                                                                  | <-REC<-?  ?→ LRR-repeats+AP-GTPase+COR+TIR*→                                                                    | LRR-repeats+AP-GTPase+COR+TIR     | 1256 | -        | Gammaproteobacteria | Pseudoalteromonas rubra      | TIR domain-containing protein [Pseudoalteromonas rubra].                          | GCF_005887115.1 |
| WP_138553289.1                                                                                                                  | <-REC<-?  ?→ LRR-repeats+AP-GTPase+COR+TIR*→                                                                    | LRR-repeats+AP-GTPase+COR+TIR     | 1255 | -        | Gammaproteobacteria | Pseudoalteromonas rubra      | TIR domain-containing protein [Pseudoalteromonas rubra].                          | GCF_005887405.1 |
| WP_139281522.1                                                                                                                  | LRR-repeats+AP-GTPase+COR+TIR*→                                                                                 | LRR-repeats+AP-GTPase+COR+TIR     | 850  | -        | Gammaproteobacteria | Vibrio aerogenes             | leucine-rich repeat domain-containing protein, partial [Vibrio aerogenes].        | GCF_900130105.1 |
| WP_139999876.1                                                                                                                  | TM+TM+TM→ LRR-repeats+AP-GTPase+COR+TIR*→                                                                       | LRR-repeats+AP-GTPase+COR+TIR     | 1134 | -        | Bacteroidetes       | Flavobacterium microcysteis  | leucine-rich repeat domain-containing protein [Flavobacterium microcysteis].      | GCF_006385255.1 |
| WP_140058884.1                                                                                                                  | LRR-repeats+AP-GTPase+COR+TIR*→                                                                                 | LRR-repeats+AP-GTPase+COR+TIR     | 1265 | -        | Gammaproteobacteria | Vibrio parahaemolyticus      | TIR domain-containing protein [Vibrio parahaemolyticus].                          | GCF_006376835.1 |
| WP_140063885.1                                                                                                                  | LRR-repeats+AP-GTPase+COR*→                                                                                     | LRR-repeats+AP-GTPase+COR         | 553  | -        | Gammaproteobacteria | Vibrio parahaemolyticus      | hypothetical protein, partial [Vibrio parahaemolyticus].                          | GCF_006377025.1 |
| WP_140305225.1                                                                                                                  | CI→ LRR-repeats+AP-GTPase+COR*→                                                                                 | LRR-repeats+AP-GTPase+COR         | 1113 | -        | Gammaproteobacteria | Vibrio parahaemolyticus      | GTP-binding protein [Vibrio parahaemolyticus].                                    | GCF_006374225.1 |
| WP_140384737.1                                                                                                                  | LRR-repeats+AP-GTPase+COR+TIR*→                                                                                 | LRR-repeats+AP-GTPase+COR+TIR     | 829  | -        | Bacteroidetes       | Elizabethkingia anophelis    | TIR domain-containing protein, partial [Elizabethkingia anophelis].               | GCF_900156995.1 |
| WP_141211867.1                                                                                                                  | LRR-repeats+AP-GTPase+COR+CASPASE*→  <-?  Cluster1731_2clades→?→  <-Cluster2482_2clades                         | LRR-repeats+AP-GTPase+COR+CASPASE | 835  | -        | Cyanobacteria       | Pseudanabaena sp. SR411      | leucine-rich repeat domain-containing protein, partial [Pseudanabaena sp. SR411]. | GCF_002251945.1 |
| WP_141954907.1                                                                                                                  | LRR-repeats+AP-GTPase+COR*→                                                                                     | LRR-repeats+AP-GTPase+COR         | 1074 | -        | Actinobacteria      | Actinoallomurus bryophytorum | hypothetical protein [Actinoallomurus bryophytorum].                              | GCF_006716425.1 |
| WP_142449077.1                                                                                                                  | LRR-repeats+AP-GTPase+COR+TIR*→ TIR→                                                                            | LRR-repeats+AP-GTPase+COR+TIR     | 700  | -        | Bacteroidetes       | Flavobacterium resistens     | leucine-rich repeat domain-containing protein [Flavobacterium resistens].         | GCF_900182645.1 |

| acc            | operon                                                                                                                  | architecture                          | len  | gen.name | taxend                    | species                              | define                                                                            | gca             |
|----------------|-------------------------------------------------------------------------------------------------------------------------|---------------------------------------|------|----------|---------------------------|--------------------------------------|-----------------------------------------------------------------------------------|-----------------|
| WP_142602418.1 | LRR-repeats+AP-GTPase+COR*→ PSE→ PSE→  <?  ?→  <?<?<-Cluster2042_2clades                                                | LRR-repeats+AP-GTPase+COR             | 718  | -        | Cyanobacteria             | Pseudanabaena sp. UWO310             | leucine-rich repeat domain-containing protein [Pseudanabaena sp. UWO310].         | GCF_006861605.1 |
| WP_142653260.1 | LRR-repeats→ LRR-repeats+AP-GTPase+COR+CASPASE*→?→?→  <?<?<-REC                                                         | LRR-repeats+AP-GTPase+COR+CASPASE     | 1028 | -        | Cyanobacteria             | Pseudanabaena sp. UWO311             | leucine-rich repeat domain-containing protein [Pseudanabaena sp. UWO311].         | GCF_006937785.1 |
| WP_142654307.1 | Cluster54_3clades→?→?→?→ LRR-repeats+AP-GTPase+COR+CASPASE*→?→?→  <?<-TPR-repeats+CASPASE<-TPR-repeats+CASPASE          | LRR-repeats+AP-GTPase+COR+CASPASE     | 1096 | -        | Cyanobacteria             | Pseudanabaena sp. UWO311             | leucine-rich repeat domain-containing protein [Pseudanabaena sp. UWO311].         | GCF_006937785.1 |
| WP_142657357.1 | ABC-ATPase→?→?→?→?→ Cluster1009_2clades→ Cluster53_2clades→ LRR-repeats+AP-GTPase+COR*→  <?  ?→?→?→ SIG+TM+TM+TM+TM+TM→ | LRR-repeats+AP-GTPase+COR             | 992  | -        | Cyanobacteria             | Pseudanabaena sp. UWO311             | leucine-rich repeat domain-containing protein [Pseudanabaena sp. UWO311].         | GCF_006937785.1 |
| WP_142891598.1 | LRR-repeats+AP-GTPase+COR+DrHyd*→                                                                                       | LRR-repeats+AP-GTPase+COR+DrHyd       | 1516 | -        | Gammaproteobacteria       | Aliikangiella sp. M105               | hypothetical protein [Aliikangiella sp. M105].                                    | GCF_007004725.1 |
| WP_143234350.1 | <-REC<?  ?→ LRR-repeats+AP-GTPase+COR+TIR*→                                                                             | LRR-repeats+AP-GTPase+COR+TIR         | 888  | -        | Actinobacteria            | Actinoplanes atraurantiacus          | GTPase [Actinoplanes atraurantiacus].                                             | GCF_900215205.1 |
| WP_143288104.1 | LRR-repeats+AP-GTPase+COR*→  <-SIG+TM+TM+TM+TM                                                                          | LRR-repeats+AP-GTPase+COR             | 716  | -        | Cyanobacteria             | Calothrix rhizosoleniae              | GTP-binding protein, partial [Calothrix rhizosoleniae].                           | GCF_900185595.1 |
| WP_143288141.1 | LRR-repeats+AP-GTPase+COR+TM+TM*→                                                                                       | LRR-repeats+AP-GTPase+COR+TM+TM       | 777  | -        | Cyanobacteria             | Calothrix rhizosoleniae              | leucine-rich repeat domain-containing protein, partial [Calothrix rhizosoleniae]. | GCF_900185595.1 |
| WP_143301191.1 | LRR-repeats+AP-GTPase+COR+DUF4404*→?→  <-RNA-Helicase                                                                   | LRR-repeats+AP-GTPase+COR+DUF4404     | 650  | -        | Nitrospinae/Tectomicrobia | Candidatus Entotheonella palauensis  | GTP-binding protein, partial [Candidatus Entotheonella palauensis].               | GCF_900079105.1 |
| WP_143674573.1 | LRR-repeats+AP-GTPase+COR*→                                                                                             | LRR-repeats+AP-GTPase+COR             | 802  | -        | Actinobacteria            | Streptomyces sp. HG99                | hypothetical protein, partial [Streptomyces sp. HG99].                            | GCF_002742045.1 |
| WP_143814854.1 | SIGMA-HTH→?→  <?<?<?<?<?  LRR-repeats+AP-GTPase+COR*→                                                                   | LRR-repeats+AP-GTPase+COR             | 861  | -        | Alphaproteobacteria       | Magnetofaba australis                | hypothetical protein [Magnetofaba australis].                                     | GCF_002109495.1 |
| WP_144282986.1 | LRR-repeats+AP-GTPase+COR+TIR*→?→?→?→  <?<?<?<-HISKIN                                                                   | LRR-repeats+AP-GTPase+COR+TIR         | 1293 | -        | Bacteroidetes             | Chryseobacterium echinoideorum       | leucine-rich repeat domain-containing protein [Chryseobacterium echinoideorum].   | GCF_007474535.1 |
| WP_144984133.1 | TIR+APATPase+TPR+TPR+TPR→ LRR-repeats+AP-GTPase+COR+TM+TM+TM+TM*→                                                       | LRR-repeats+AP-GTPase+COR+TM+TM+TM+TM | 1242 | -        | Planctomycetes            | Gimesia aquarii                      | leucine-rich repeat domain-containing protein [Gimesia aquarii].                  | GCF_007748195.1 |
| WP_145277465.1 | LRR-repeats+AP-GTPase+COR+DUF4404*→                                                                                     | LRR-repeats+AP-GTPase+COR+DUF4404     | 1013 | -        | Planctomycetes            | Planctomycetes bacterium EIP         | leucine-rich repeat domain-containing protein [Planctomycetes bacterium EIP].     | -               |
| WP_145532816.1 | CI→ LRR-repeats+AP-GTPase+COR*→                                                                                         | LRR-repeats+AP-GTPase+COR             | 1113 | -        | Gammaproteobacteria       | Vibrio sp. ES.045                    | GTP-binding protein [Vibrio sp. ES.045].                                          | GCF_007827265.1 |
| WP_145988187.1 | <-Classical-AAA<-Trichomonas-DAM  LRR-repeats+AP-GTPase*→  <?<-Cluster1368_2clades<-Cluster2311_2clades                 | LRR-repeats+AP-GTPase                 | 621  | -        | Alphaproteobacteria       | Blastochloris tepida                 | leucine-rich repeat domain-containing protein [Blastochloris tepida].             | GCF_003966715.1 |
| WP_146033967.1 | LRR-repeats+AP-GTPase+COR+DUF4404*→                                                                                     | LRR-repeats+AP-GTPase+COR+DUF4404     | 700  | -        | Cyanobacteria             | Nostoc cycadae                       | GTP-binding protein, partial [Nostoc cycadae].                                    | GCF_002897135.1 |
| WP_146129808.1 | LRR-repeats→ LRR-repeats+AP-GTPase+COR*→                                                                                | LRR-repeats+AP-GTPase+COR             | 715  | -        | Bacteroidetes             | Muricauda pacifica                   | hypothetical protein [Muricauda pacifica].                                        | GCF_003001695.1 |
| WP_146156812.1 | TPR-repeats→?→ SIG+Alba→  <?<?<?<?<?  LRR-repeats+AP-GTPase+COR*→                                                       | LRR-repeats+AP-GTPase+COR             | 857  | -        | Bacteroidetes             | Sphingobacteriales bacterium UPWRP_1 | GTP-binding protein [Sphingobacteriales bacterium UPWRP_1].                       | -               |
| WP_146201360.1 | LRR-repeats+AP-GTPase+COR+TIR*→                                                                                         | LRR-repeats+AP-GTPase+COR+TIR         | 780  | -        | Gammaproteobacteria       | Leucothrix arctica                   | TIR domain-containing protein [Leucothrix arctica].                               | GCF_003172895.1 |

| acc            | operon                                                                                                                                                                                                                        | architecture                       | len  | gen.name | taxend              | species                         | define                                                                           | gca             |
|----------------|-------------------------------------------------------------------------------------------------------------------------------------------------------------------------------------------------------------------------------|------------------------------------|------|----------|---------------------|---------------------------------|----------------------------------------------------------------------------------|-----------------|
| WP_146215520.1 | LRR-repeats+AP-GTPase+COR+TM+TM+TM*→  <-PSE<-?<-?<-?<-?<-Cluster1270_2clades                                                                                                                                                  | LRR-repeats+AP-GTPase+COR+TM+TM+TM | 1504 | -        | Alphaproteobacteria | Hoeflea marina                  | hypothetical protein [Hoeflea marina].                                           | GCF_003182275.1 |
| WP_146505417.1 | LRR-repeats→ LRR-repeats+AP-GTPase+COR*→                                                                                                                                                                                      | LRR-repeats+AP-GTPase+COR          | 795  | -        | Chloroflexi         | Thermosporothrix hazakensis     | GTPase [Thermosporothrix hazakensis].                                            | GCF_003253565.1 |
| WP_146848114.1 | LRR-repeats+AP-GTPase+COR*→                                                                                                                                                                                                   | LRR-repeats+AP-GTPase+COR          | 846  | -        | Bacteroidetes       | Aequorivita antarctica          | hypothetical protein [Aequorivita antarctica].                                   | GCF_007997155.1 |
| WP_146849445.1 | SIG+TM→?→ LRR-repeats+AP-GTPase+COR*→                                                                                                                                                                                         | LRR-repeats+AP-GTPase+COR          | 1099 | -        | Verrucomicrobia     | Brevifollis gellanilyticus      | leucine-rich repeat domain-containing protein [Brevifollis gellanilyticus].      | GCF_007992435.1 |
| WP_146856190.1 | LRR-repeats+AP-GTPase+COR+DUF4404*→                                                                                                                                                                                           | LRR-repeats+AP-GTPase+COR+DUF4404  | 944  | -        | Verrucomicrobia     | Brevifollis gellanilyticus      | leucine-rich repeat domain-containing protein [Brevifollis gellanilyticus].      | GCF_007992435.1 |
| WP_147290429.1 | <-Aminotran_1_2<-?  ?→?→  <-Arginase  ?→ LRR-repeats+AP-GTPase+COR+TIR*→  <-?<-PSE<-?<-?<-?<-?<-Cluster1063_3clades<-Cluster1067_3clades                                                                                      | LRR-repeats+AP-GTPase+COR+TIR      | 1134 | -        | Alphaproteobacteria | Pannonibacter phragmitetus      | leucine-rich repeat domain-containing protein [Pannonibacter phragmitetus].      | GCF_000382365.1 |
| WP_147864606.1 | LRR-repeats+AP-GTPase+COR+TIR*→                                                                                                                                                                                               | LRR-repeats+AP-GTPase+COR+TIR      | 1297 | -        | Bacteroidetes       | Mesononia sp. K4-1              | leucine-rich repeat domain-containing protein [Mesononia sp. K4-1].              | GCF_008017825.1 |
| WP_148270831.1 | 35exo→  <-?<-?  ?→?→?→ LRR-repeats+AP-GTPase+COR+TIR*→  <-?<-?<-ABC-ATPase+APATPase+ABC-ATPase<-?  SIGMA-HTH→                                                                                                                 | LRR-repeats+AP-GTPase+COR+TIR      | 935  | -        | Bacteroidetes       | Haliscomenobacter hydrossis     | leucine-rich repeat domain-containing protein [Haliscomenobacter hydrossis].     | GCF_000212735.1 |
| WP_148270849.1 | LRR-repeats+AP-GTPase+COR+EAD11*→?→?→?→?→?→ UvsW-A18→                                                                                                                                                                         | LRR-repeats+AP-GTPase+COR+EAD11    | 1113 | -        | Bacteroidetes       | Haliscomenobacter hydrossis     | GTP-binding protein [Haliscomenobacter hydrossis].                               | GCF_000212735.1 |
| WP_148270854.1 | MACRODOMAIN→?→ LRR-repeats+AP-GTPase+COR+EAD11*→                                                                                                                                                                              | LRR-repeats+AP-GTPase+COR+EAD11    | 1041 | -        | Bacteroidetes       | Haliscomenobacter hydrossis     | Miro domain-containing protein [Haliscomenobacter hydrossis].                    | GCF_000212735.1 |
| WP_148705297.1 | <-HhH-RADC+JAB  ?→ NTP_transf_3→ LRR-repeats+AP-GTPase+COR*→                                                                                                                                                                  | LRR-repeats+AP-GTPase+COR          | 1056 | -        | Euryarchaeota       | Methanosarcina siciliae         | leucine-rich repeat domain-containing protein [Methanosarcina siciliae].         | GCF_000970125.1 |
| WP_149986249.1 | SIG+TM+TM+TM+TM+TM+TM+TM+TM→  <-?  Mbetalac→ SAM-methylase→?→  <-?<-SIG+TPM_phosphatase+TM+TM+TM  LRR-repeats+AP-GTPase+COR+TM+TM*→ Cluster1550_2clades→?→?→?→?→  <-Cluster995_2clades  tRNA→ LRR-repeats+AP-GTPase+COR+TIR*→ | LRR-repeats+AP-GTPase+COR+TM+TM    | 829  | -        | Cyanobacteria       | Microcystis aeruginosa          | leucine-rich repeat protein [Microcystis aeruginosa].                            | GCF_008579325.1 |
| WP_150032603.1 | LRR-repeats+AP-GTPase+COR+TIR*→                                                                                                                                                                                               | LRR-repeats+AP-GTPase+COR+TIR      | 1161 | -        | Bacteroidetes       | Taibaiella sp. KVB11            | leucine-rich repeat domain-containing protein [Taibaiella sp. KVB11].            | GCF_008629695.1 |
| WP_150875462.1 | <-ABC-ATPase<-?<-?  ?→?→ LRR-repeats+AP-GTPase+COR+TIR*→                                                                                                                                                                      | LRR-repeats+AP-GTPase+COR+TIR      | 976  | -        | Bacteroidetes       | Larkinella sp. MA1              | leucine-rich repeat domain-containing protein [Larkinella sp. MA1].              | GCF_008727875.1 |
| WP_150977944.1 | CHTH→ LRR-repeats+AP-GTPase+COR+TM+TM*→                                                                                                                                                                                       | LRR-repeats+AP-GTPase+COR+TM+TM    | 796  | -        | Cyanobacteria       | Microcystis aeruginosa          | leucine-rich repeat domain-containing protein [Microcystis aeruginosa].          | GCF_008757435.1 |
| WP_151015117.1 | LRR-repeats+AP-GTPase+COR*→                                                                                                                                                                                                   | LRR-repeats+AP-GTPase+COR          | 946  | -        | Actinobacteria      | Micromonospora aurantiaca       | leucine-rich repeat domain-containing protein [Micromonospora aurantiaca].       | GCF_008806405.1 |
| WP_151968636.1 | LRR-repeats+AP-GTPase+COR*→                                                                                                                                                                                                   | LRR-repeats+AP-GTPase+COR          | 803  | -        | Planctomycetes      | Planctomycetes bacterium SRT547 | leucine-rich repeat domain-containing protein [Planctomycetes bacterium SRT547]. | -               |
| WP_152037914.1 | LRR-repeats+AP-GTPase+COR*→                                                                                                                                                                                                   | LRR-repeats+AP-GTPase+COR          | 919  | -        | Actinobacteria      | Micromonospora sp. B006         | leucine-rich repeat domain-containing protein [Micromonospora sp. B006].         | GCF_003408515.1 |
| WP_152532113.1 | LRR-repeats+AP-GTPase+COR*→                                                                                                                                                                                                   | LRR-repeats+AP-GTPase+COR          | 814  | -        | Cyanobacteria       | Leptolyngbya sp. Heron Island J | leucine-rich repeat domain-containing protein [Leptolyngbya sp. Heron Island J]. | -               |

| acc            | operon                                                                                                                                   | architecture                      | len  | gen.name | taxend              | species                          | define                                                                          | gca             |
|----------------|------------------------------------------------------------------------------------------------------------------------------------------|-----------------------------------|------|----------|---------------------|----------------------------------|---------------------------------------------------------------------------------|-----------------|
| WP_152589868.1 | <-Ferretin<-PSE<-?  ?→  <-Ferredoxin-beta-grasp<-PSE<-?  LRR-repeats+AP-GTPase+COR*→?→?→  <-?  ?→  <-?  PSE→ PSE→ ClpABN-AAA+ClpABC-AAA→ | LRR-repeats+AP-GTPase+COR         | 993  | -        | Cyanobacteria       | Nostoc sphaeroides               | leucine-rich repeat domain-containing protein [Nostoc sphaeroides].             | GCF_009372195.1 |
| WP_152648774.1 | NUDIX→?→?→ LRR-repeats+AP-GTPase+COR*→?→?→  <-?<-?  ?→  <-Cluster2230_2clades                                                            | LRR-repeats+AP-GTPase+COR         | 954  | -        | Actinobacteria      | Streptacidiphilus ammyonensis    | hypothetical protein [Streptacidiphilus ammyonensis].                           | GCF_000787855.1 |
| WP_153009609.1 | <-Cluster1102_3clades<-Cluster1102_3clades  ?→?→?→  <-Cluster5_5clades<-?  LRR-repeats+AP-GTPase+COR*→                                   | LRR-repeats+AP-GTPase+COR         | 997  | -        | Cyanobacteria       | Mastigocoleus testarum           | leucine-rich repeat domain-containing protein [Mastigocoleus testarum].         | GCF_001456025.1 |
| WP_153023587.1 | TM→ LRR-repeats+AP-GTPase+COR*→                                                                                                          | LRR-repeats+AP-GTPase+COR         | 1070 | -        | Actinobacteria      | Glycomyces albidus               | leucine-rich repeat domain-containing protein [Glycomyces albidus].             | -               |
| WP_153228358.1 | <-Cluster5_5clades  LRR-repeats+AP-GTPase+COR+DUF4404*→  <-?<-ABC-ATPase<-?  ?→  <-REC                                                   | LRR-repeats+AP-GTPase+COR+DUF4404 | 992  | -        | Cyanobacteria       | Anabaena sp. YBS01               | leucine-rich repeat domain-containing protein [Anabaena sp. YBS01].             | GCF_009498015.1 |
| WP_153456319.1 | LRR-repeats+AP-GTPase+COR*→                                                                                                              | LRR-repeats+AP-GTPase+COR         | 992  | -        | Actinobacteria      | Streptomyces sp. RB5             | GTPase [Streptomyces sp. RB5].                                                  | -               |
| WP_153661567.1 | <-cNMPBD<-cNMPBD  ?→?→ LRR-repeats+AP-GTPase+COR+TM+TM*→                                                                                 | LRR-repeats+AP-GTPase+COR+TM+TM   | 1103 | -        | Bacteroidetes       | Chitinophaga sp. SYP-B3965       | leucine-rich repeat domain-containing protein [Chitinophaga sp. SYP-B3965].     | GCF_009647655.1 |
| WP_155076197.1 | LRR-repeats+AP-GTPase+COR*→                                                                                                              | LRR-repeats+AP-GTPase+COR         | 899  | -        | Bacteroidetes       | Flavobacterium sp. MC2016-06     | GTP-binding protein [Flavobacterium sp. MC2016-06].                             | GCF_009711165.1 |
| WP_155705093.1 | SIG+Trypsin+PDZ→?→?→ LRR-repeats+AP-GTPase+COR*→                                                                                         | LRR-repeats+AP-GTPase+COR         | 951  | -        | Firmicutes          | Paenibacillus psychroresistens   | GTP-binding protein [Paenibacillus psychroresistens].                           | GCF_009728935.1 |
| WP_155743676.1 | LRR-repeats+AP-GTPase+COR+EAD1*→  <-PSE  Pkinase→ Pkinase→?→?→  <-Cluster5_5clades                                                       | LRR-repeats+AP-GTPase+COR+EAD1    | 1152 | -        | Cyanobacteria       | Scytonema sp. UIC 10036          | leucine-rich repeat domain-containing protein [Scytonema sp. UIC 10036].        | GCF_009725235.1 |
| WP_155746360.1 | LRR-repeats→  <-?<-Cluster5_5clades  LRR-repeats→?→ LRR-repeats+AP-GTPase+COR+EAD1*→?→?→ Cluster5_5clades→                               | LRR-repeats+AP-GTPase+COR+EAD1    | 988  | -        | Cyanobacteria       | Scytonema sp. UIC 10036          | leucine-rich repeat domain-containing protein [Scytonema sp. UIC 10036].        | GCF_009725235.1 |
| WP_156420697.1 | TetR-HTH→?→?→  <-?<-?<-?  LRR-repeats+AP-GTPase+COR+TIR*→                                                                                | LRR-repeats+AP-GTPase+COR+TIR     | 1173 | -        | Alphaproteobacteria | Sphingopyxis sp. HXXIV           | TIR domain-containing protein [Sphingopyxis sp. HXXIV].                         | GCF_001468305.1 |
| WP_157205648.1 | Cluster5_5clades→?→?→ HTH→ LRR-repeats+AP-GTPase+COR+TIR*→ Cluster1019_2clades→?→?→  <-?<-?<-?  Cluster833_2clades→                      | LRR-repeats+AP-GTPase+COR+TIR     | 1096 | -        | Gammaproteobacteria | Methylomonas koyamae             | TIR domain-containing protein [Methylomonas koyamae].                           | GCF_001644135.1 |
| WP_157310052.1 | LRR-repeats+AP-GTPase+COR+TIR*→                                                                                                          | LRR-repeats+AP-GTPase+COR+TIR     | 917  | -        | Bacteroidetes       | Chitinophaga sp. ysch24          | leucine-rich repeat protein [Chitinophaga sp. ysch24].                          | GCF_009758205.1 |
| WP_157453024.1 | LRR-repeats+AP-GTPase+COR+DUF4404*→                                                                                                      | LRR-repeats+AP-GTPase+COR+DUF4404 | 1156 | -        | Cyanobacteria       | Coleofasciculus chthonoplastes   | leucine-rich repeat domain-containing protein [Coleofasciculus chthonoplastes]. | -               |
| WP_157546628.1 | <-SIG+TM+TM+TM+TM+TM+TM+TM+TM  ?→?→?→  <-?  ?→?→ LRR-repeats+AP-GTPase+COR*→                                                             | LRR-repeats+AP-GTPase+COR         | 585  | -        | Actinobacteria      | Hamadaea tsunoensis              | leucine-rich repeat domain-containing protein [Hamadaea tsunoensis].            | GCF_000428945.1 |
| WP_157584649.1 | LRR-repeats+AP-GTPase+COR+TIR*→  <-?  ABC_membrane+ABC_tran→                                                                             | LRR-repeats+AP-GTPase+COR+TIR     | 937  | -        | Bacteroidetes       | Spirosoma sp. HMF4905            | leucine-rich repeat domain-containing protein [Spirosoma sp. HMF4905].          | GCF_009754945.1 |
| WP_157585892.1 | LRR-repeats+AP-GTPase+COR+TIR*→ Cluster1510_2clades→                                                                                     | LRR-repeats+AP-GTPase+COR+TIR     | 1129 | -        | Bacteroidetes       | Spirosoma sp. HMF4905            | leucine-rich repeat domain-containing protein [Spirosoma sp. HMF4905].          | -               |
| WP_157590734.1 | ABhydrolase+ABhydrolase+CASPASE+TPR-S→  <-?  LRR-repeats+AP-GTPase+COR+TIR*→                                                             | LRR-repeats+AP-GTPase+COR+TIR     | 1169 | -        | Bacteroidetes       | Spirosoma sp. HMF4905            | leucine-rich repeat domain-containing protein [Spirosoma sp. HMF4905].          | GCF_009754945.1 |
| WP_157879249.1 | LRR-repeats+AP-GTPase+COR+TIR*→  <-PSE<-?<-?<-?<-?<-?<-REC                                                                               | LRR-repeats+AP-GTPase+COR+TIR     | 656  | -        | Alphaproteobacteria | Pararhodospirillum photometricum | hypothetical protein [Pararhodospirillum photometricum].                        | GCF_000284415.1 |





| acc            | operon                                                                                                                       | architecture                      | len  | gen.name | taxend              | species                                  | define                                                                                             | gca             |
|----------------|------------------------------------------------------------------------------------------------------------------------------|-----------------------------------|------|----------|---------------------|------------------------------------------|----------------------------------------------------------------------------------------------------|-----------------|
| WP_159789529.1 | <-Cluster1921_2clades<-?<-?  ?<-?  ?<-?> LRR-repeats+AP-GTPase+COR*->?>  <-?<-REC                                            | LRR-repeats+AP-GTPase+COR         | 771  | -        | Cyanobacteria       | Microcoleus sp. IPPAS B-353              | leucine-rich repeat domain-containing protein [Microcoleus sp. IPPAS B-353].                       | GCF_009846485.1 |
| WP_160075537.1 | LRR-repeats+AP-GTPase+COR+TIR*->                                                                                             | LRR-repeats+AP-GTPase+COR+TIR     | 1088 | -        | Bacteroidetes       | Saprospirales bacterium GYS_P2D          | leucine-rich repeat domain-containing protein [Saprospirales bacterium GYS_P2D].                   | -               |
| WP_160131147.1 | SIGMA-HTH->?> RADICAL-SAM-> LRR-repeats+AP-GTPase+COR+TIR*->  <-REC<-?<-?<-?  ?> HISKIN->                                    | LRR-repeats+AP-GTPase+COR+TIR     | 1229 | -        | Bacteroidetes       | Kordia antarctica                        | leucine-rich repeat domain-containing protein [Kordia antarctica].                                 | GCF_009901525.1 |
| WP_160148531.1 | <-SIG+Trypsin+PDZ<-?<-?<-?  ?<-?> LRR-repeats+AP-GTPase+COR+TCAD2*->                                                         | LRR-repeats+AP-GTPase+COR+TCAD2   | 919  | -        | Cyanobacteria       | Leptolyngbya sp. PCC 7376                | leucine-rich repeat domain-containing protein [Leptolyngbya sp. PCC 7376].                         | GCF_000316605.1 |
| WP_161144175.1 | Cluster1913_2clades->?>?>?>?> LRR-repeats+AP-GTPase*->                                                                       | LRR-repeats+AP-GTPase             | 512  | -        | Firmicutes          | Dorea sp. BIOML-A1                       | hypothetical protein [Dorea sp. BIOML-A1].                                                         | GCF_009875615.1 |
| WP_161213661.1 | LRR-repeats+AP-GTPase+COR*->  <-NUDIX                                                                                        | LRR-repeats+AP-GTPase+COR         | 1340 | -        | Actinobacteria      | unclassified Streptomyces                | MULTISPECIES: leucine-rich repeat domain-containing protein [unclassified Streptomyces].           | GCF_900091775.1 |
| WP_161967152.1 | <-Aminotran_1_2<-?  LRR-repeats+AP-GTPase+COR+TIR*->  <-?<-?<-?<-DSBH+AraC-HTH+AraC-HTH                                      | LRR-repeats+AP-GTPase+COR+TIR     | 1219 | -        | Planctomycetes      | Fimbrioglobus ruber                      | hypothetical protein [Fimbrioglobus ruber].                                                        | GCF_002197845.1 |
| WP_161967198.1 | <-RelE-ParE<-?  ?<-?> LRR-repeats->  <-?  LRR-repeats+AP-GTPase+COR*->                                                       | LRR-repeats+AP-GTPase+COR         | 915  | -        | Planctomycetes      | Fimbrioglobus ruber                      | leucine-rich repeat domain-containing protein [Fimbrioglobus ruber].                               | GCF_002197845.1 |
| WP_162292932.1 | LRR-repeats+AP-GTPase+COR*->?>?>?>  <-?<-ABC-ATPase+ABC-ATPase                                                               | LRR-repeats+AP-GTPase+COR         | 1975 | -        | Actinobacteria      | Actinophytocola xinjiangensis            | leucine-rich repeat domain-containing protein [Actinophytocola xinjiangensis].                     | GCF_001921215.1 |
| WP_162399370.1 | LRR-repeats+AP-GTPase+COR*->?>  <-?  ?>  <-?<-?  ?> ClpABN-AAA+ClpABC-AAA->                                                  | LRR-repeats+AP-GTPase+COR         | 895  | -        | Cyanobacteria       | Nostoc sp. B(2019)                       | leucine-rich repeat domain-containing protein, partial [Nostoc sp. B(2019)].                       | GCF_010091925.1 |
| WP_162488066.1 | TM+TM->?>  <-?  ?> PSE->  <-?  ?>?> LRR-repeats+AP-GTPase+COR+TIR*->  <-?<-?  ABC_membrane+ABC_tran->?> Cluster968_2clades-> | LRR-repeats+AP-GTPase+COR+TIR     | 1120 | -        | Alphaproteobacteria | Azospirillum lipoferum                   | TIR domain-containing protein [Azospirillum lipoferum].                                            | GCF_000283655.1 |
| WP_162528069.1 | LRR-repeats+AP-GTPase+COR*->                                                                                                 | LRR-repeats+AP-GTPase+COR         | 781  | -        | Alphaproteobacteria | Rhodobacterales bacterium                | leucine-rich repeat domain-containing protein [Rhodobacterales bacterium].                         | -               |
| WP_162667694.1 | <-Cluster1291_2clades<-?<-PSE<-?  ?<-?>?> LRR-repeats+AP-GTPase*->?>  <-?  ?<-?>?> ParB->                                    | LRR-repeats+AP-GTPase             | 617  | -        | Planctomycetes      | Gemmata massiliana                       | hypothetical protein [Gemmata massiliana].                                                         | GCF_901538265.1 |
| WP_162668063.1 | LRR-repeats+AP-GTPase+COR+DUF4404*->  <-?<-?<-?  ?>  <-LRR-repeats  REC->                                                    | LRR-repeats+AP-GTPase+COR+DUF4404 | 978  | -        | Planctomycetes      | Gemmata massiliana                       | leucine-rich repeat domain-containing protein [Gemmata massiliana].                                | GCF_901538265.1 |
| WP_163431087.1 | TIR-> LRR-repeats+AP-GTPase+COR+TIR*-> PSE->?>?>  <-?<-SIG+TM+TM+TM+HISKIN                                                   | LRR-repeats+AP-GTPase+COR+TIR     | 1384 | -        | Bacteroidetes       | unclassified Flavobacterium              | MULTISPECIES: leucine-rich repeat domain-containing protein [unclassified Flavobacterium].         | GCF_013874595.1 |
| WP_163660644.1 | LRR-repeats+AP-GTPase*->                                                                                                     | LRR-repeats+AP-GTPase             | 311  | -        | Cyanobacteria       | Leptolyngbyaceae cyanobacterium CCMR0082 | leucine-rich repeat domain-containing protein [Leptolyngbyaceae cyanobacterium CCMR0082].          | -               |
| WP_163671600.1 | LRR-repeats+AP-GTPase+COR+TIR*->                                                                                             | LRR-repeats+AP-GTPase+COR+TIR     | 855  | -        | Cyanobacteria       | Leptolyngbyaceae cyanobacterium CCMR0082 | leucine-rich repeat domain-containing protein, partial [Leptolyngbyaceae cyanobacterium CCMR0082]. | -               |

| acc            | operon                                                                                                               | architecture                      | len  | gen.name | taxend              | species                                  | define                                                                                     | gca             |
|----------------|----------------------------------------------------------------------------------------------------------------------|-----------------------------------|------|----------|---------------------|------------------------------------------|--------------------------------------------------------------------------------------------|-----------------|
| WP_163671893.1 | <-NACHT<-?  LRR-repeats+AP-GTPase+COR+TIR*->  <-?  PSE->  <-NACHT+68TM-wHTH<-?  ?->?->  <-?  Cluster53_2clades->     | LRR-repeats+AP-GTPase+COR+TIR     | 726  | -        | Cyanobacteria       | Leptolyngbyaceae cyanobacterium CCMR0082 | TIR domain-containing protein [Leptolyngbyaceae cyanobacterium CCMR0082].                  | -               |
| WP_163697061.1 | LRR-repeats+AP-GTPase+COR+TIR*->?->  <-?<-?<-?  ?->  <-Cluster1829_2clades                                           | LRR-repeats+AP-GTPase+COR+TIR     | 1274 | -        | Cyanobacteria       | Leptolyngbyaceae cyanobacterium CCMR0081 | leucine-rich repeat domain-containing protein [Leptolyngbyaceae cyanobacterium CCMR0081].  | -               |
| WP_163702516.1 | <-SIG+DM13  ?->?->?->?-> PIN-> LRR-repeats+AP-GTPase+COR+TIR*->?-> PSE->?->?->?->  <-?<-SIG+TM+TM+Calcineurin        | LRR-repeats+AP-GTPase+COR+TIR     | 993  | -        | Cyanobacteria       | Leptolyngbyaceae cyanobacterium CCMR0081 | leucine-rich repeat domain-containing protein [Leptolyngbyaceae cyanobacterium CCMR0081].  | -               |
| WP_163703138.1 | SIR2->?->?->?->?->?-> LRR-repeats+AP-GTPase+COR+TIR*-> PSE->  <-Pentapeptide                                         | LRR-repeats+AP-GTPase+COR+TIR     | 830  | -        | Cyanobacteria       | Leptolyngbyaceae cyanobacterium CCMR0081 | TIR domain-containing protein [Leptolyngbyaceae cyanobacterium CCMR0081].                  | -               |
| WP_163833956.1 | LRR-repeats+AP-GTPase+COR+DUF4404*->  <-?<-CHTH                                                                      | LRR-repeats+AP-GTPase+COR+DUF4404 | 1124 | -        | Gammaproteobacteria | Spartinivivinus ruber                    | leucine-rich repeat domain-containing protein [Spartinivivinus ruber].                     | GCF_011009015.1 |
| WP_163929292.1 | LRR-repeats+AP-GTPase+COR+TIR*->  <-?<-?<-TIR<-?<-SIG+NUDIX                                                          | LRR-repeats+AP-GTPase+COR+TIR     | 1024 | -        | Cyanobacteria       | Nostoc sp. UIC 10630                     | leucine-rich repeat domain-containing protein [Nostoc sp. UIC 10630].                      | GCF_010747425.1 |
| WP_163938989.1 | LRR-repeats+AP-GTPase+COR+TIR*->                                                                                     | LRR-repeats+AP-GTPase+COR+TIR     | 795  | -        | Cyanobacteria       | Nostoc sp. UIC 10630                     | leucine-rich repeat domain-containing protein, partial [Nostoc sp. UIC 10630].             | GCF_010747425.1 |
| WP_164035239.1 | Cluster998_2clades->?->  <-?<-?<-?  SAM-methylase->? tRNA-> LRR-repeats+AP-GTPase+COR*->                             | LRR-repeats+AP-GTPase+COR         | 858  | -        | Bacteroidetes       | Spirosoma agri                           | hypothetical protein [Spirosoma agri].                                                     | GCF_010747415.1 |
| WP_164490209.1 | FGS-> FGS-> FGS-> LRR-repeats+AP-GTPase+COR+CASPASE*->                                                               | LRR-repeats+AP-GTPase+COR+CASPASE | 976  | -        | Bacteroidetes       | Runella sp. SP2                          | leucine-rich repeat domain-containing protein [Runella sp. SP2].                           | GCF_003711225.1 |
| WP_164638795.1 | LRR-repeats+AP-GTPase+COR+TIR*->  <-?<-?<-?<-ABC-ATPase  ?-> REC->                                                   | LRR-repeats+AP-GTPase+COR+TIR     | 1173 | -        | Alphaproteobacteria | Rhodospseudomonas sp. BR0G17             | leucine-rich repeat domain-containing protein [Rhodospseudomonas sp. BR0G17].              | GCF_010907025.1 |
| WP_164714180.1 | LRR-repeats+AP-GTPase+COR+TIR*->  <-?<-?  ?-> cNMPBD-> SIG+TM+TM+TM->                                                | LRR-repeats+AP-GTPase+COR+TIR     | 1056 | -        | Bacteroidetes       | Chitinophaga rhizosphaerae               | leucine-rich repeat domain-containing protein [Chitinophaga rhizosphaerae].                | GCF_003958645.1 |
| WP_165253289.1 | LRR-repeats+AP-GTPase+COR+TIR*->                                                                                     | LRR-repeats+AP-GTPase+COR+TIR     | 1053 | -        | Planctomycetes      | Paludisphaera soli                       | TIR domain-containing protein [Paludisphaera soli].                                        | GCF_011064595.1 |
| WP_165571460.1 | LRR-repeats+AP-GTPase+COR*->                                                                                         | LRR-repeats+AP-GTPase+COR         | 871  | -        | Bacteroidetes       | Flavobacterium hydatis                   | hypothetical protein [Flavobacterium hydatis].                                             | GCF_000737695.1 |
| WP_165772028.1 | <-SIG+TM+TM+TM+HISKIN<-?<-?<-?  ?-> LRR-repeats+AP-GTPase+COR+TIR*-> ParA-Soj-PloopNTPase-> ParB->                   | LRR-repeats+AP-GTPase+COR+TIR     | 674  | -        | Alphaproteobacteria | Niveispirillum lacus                     | TIR domain-containing protein [Niveispirillum lacus].                                      | GCF_002251795.1 |
| WP_166124895.1 | <-Cluster1501_2clades  ?->?-> LRR-repeats+AP-GTPase+COR*->?-> Cluster1023_3clades->?->  <-?  ClpABN-AAA+ClpABC-AAA-> | LRR-repeats+AP-GTPase+COR         | 925  | -        | Bacteroidetes       | unclassified Flavobacterium              | MULTISPECIES: leucine-rich repeat domain-containing protein [unclassified Flavobacterium]. | GCF_011305415.1 |
| WP_166235797.1 | LRR-repeats+AP-GTPase+COR+TM+TM*->                                                                                   | LRR-repeats+AP-GTPase+COR+TM+TM   | 954  | -        | Bacteroidetes       | Flavobacterium sp. TWA-26                | hypothetical protein [Flavobacterium sp. TWA-26].                                          | GCF_011392075.1 |
| WP_166562074.1 | LRR-repeats+AP-GTPase+COR*->                                                                                         | LRR-repeats+AP-GTPase+COR         | 931  | -        | Bacteroidetes       | Emticicia sp. CRIBPO                     | leucine-rich repeat domain-containing protein [Emticicia sp. CRIBPO].                      | GCF_009905725.1 |
| WP_167031741.1 | LRR-repeats+AP-GTPase+COR+TIR*->?->?-> TIR->                                                                         | LRR-repeats+AP-GTPase+COR+TIR     | 1295 | -        | Bacteroidetes       | Chryseobacterium sp. Tr-659              | leucine-rich repeat domain-containing protein [Chryseobacterium sp. Tr-659].               | GCF_011752975.1 |

| acc            | operon                                                                                                                | architecture                      | len  | gen.name | taxend         | species                       | define                                                                        | gca             |
|----------------|-----------------------------------------------------------------------------------------------------------------------|-----------------------------------|------|----------|----------------|-------------------------------|-------------------------------------------------------------------------------|-----------------|
| WP_167211330.1 | LRR-repeats+AP-GTPase+COR+TIR*→ TIR→                                                                                  | LRR-repeats+AP-GTPase+COR+TIR     | 1843 | -        | Bacteroidetes  | Spirosoma aureum              | leucine-rich repeat domain-containing protein [Spirosoma aureum].             | GCF_011604685.1 |
| WP_167291529.1 | LRR-repeats+AP-GTPase+COR+TIR*→                                                                                       | LRR-repeats+AP-GTPase+COR+TIR     | 1060 | -        | Bacteroidetes  | Paraflavitale devenefica      | leucine-rich repeat domain-containing protein [Paraflavitale devenefica].     | GCF_011759375.1 |
| WP_167387879.1 | LRR-repeats+AP-GTPase+COR*→                                                                                           | LRR-repeats+AP-GTPase+COR         | 967  | -        | Actinobacteria | Streptomyces recifensis       | GTPase [Streptomyces recifensis].                                             | GCF_002154615.1 |
| WP_168204481.1 | LRR-repeats→ LRR-repeats+AP-GTPase+COR+TM+TM*→                                                                        | LRR-repeats+AP-GTPase+COR+TM+TM   | 574  | -        | Cyanobacteria  | Dolichospermum sp. UHCC 0315A | hypothetical protein [Dolichospermum sp. UHCC 0315A].                         | GCF_008121535.1 |
| WP_168218871.1 | LRR-repeats+AP-GTPase+COR*→?→?→  <-?<-?<-?<-?<-PIN                                                                    | LRR-repeats+AP-GTPase+COR         | 864  | -        | Planctomycetes | Limnoglobus roseus            | leucine-rich repeat domain-containing protein [Limnoglobus roseus].           | GCF_008254045.1 |
| WP_168359257.1 | LRR-repeats+AP-GTPase+COR+TM+TM*→                                                                                     | LRR-repeats+AP-GTPase+COR+TM+TM   | 687  | -        | Cyanobacteria  | Dolichospermum planctonicum   | GTP-binding protein, partial [Dolichospermum planctonicum].                   | GCF_009712075.1 |
| WP_168360389.1 | Ferredoxin-betagrasp→?→?→ LRR-repeats→ LRR-repeats+AP-GTPase+COR*→                                                    | LRR-repeats+AP-GTPase+COR         | 682  | -        | Cyanobacteria  | Dolichospermum planctonicum   | hypothetical protein, partial [Dolichospermum planctonicum].                  | GCF_009712075.1 |
| WP_168467214.1 | LRR-repeats+AP-GTPase+COR*→ PSE→?→  <-?  ?→?→?→  <-Pentapeptide                                                       | LRR-repeats+AP-GTPase+COR         | 692  | -        | Cyanobacteria  | Aphanizomenon sp. UHCC 0183   | GTP-binding protein, partial [Aphanizomenon sp. UHCC 0183].                   | GCF_009712065.1 |
| WP_168493001.1 | <-HNN<-?  ?→ LRR-repeats+AP-GTPase+COR*→                                                                              | LRR-repeats+AP-GTPase+COR         | 1079 | -        | Cyanobacteria  | Anabaena sp. UHCC 0204        | leucine-rich repeat domain-containing protein [Anabaena sp. UHCC 0204].       | GCF_009711975.1 |
| WP_168511191.1 | NUDIX→?→?→?→ LRR-repeats+AP-GTPase+COR*→                                                                              | LRR-repeats+AP-GTPase+COR         | 1365 | -        | Actinobacteria | Streptomyces sp. S1D4-11      | leucine-rich repeat domain-containing protein [Streptomyces sp. S1D4-11].     | -               |
| WP_168644108.1 | LRR-repeats+AP-GTPase+COR+TIR*→?→  <-?<-SIG+NUDIX                                                                     | LRR-repeats+AP-GTPase+COR+TIR     | 963  | -        | Cyanobacteria  | Dolichospermum sp. UHCC 0259  | leucine-rich repeat domain-containing protein [Dolichospermum sp. UHCC 0259]. | GCF_009711935.1 |
| WP_169190548.1 | <-ABC-ATPase<-?<-?<-?<-?  ?→ tRNA→?→ LRR-repeats+AP-GTPase+COR+TIR*→                                                  | LRR-repeats+AP-GTPase+COR+TIR     | 1190 | -        | Bacteroidetes  | Chitinophaga sp. Ak27         | leucine-rich repeat domain-containing protein [Chitinophaga sp. Ak27].        | GCF_012726295.1 |
| WP_169266449.1 | LRR-repeats+AP-GTPase+COR+TIR*→  <-?  ?→  <-?  NUDIX→                                                                 | LRR-repeats+AP-GTPase+COR+TIR     | 936  | -        | Cyanobacteria  | Brasilonema octagenarum       | leucine-rich repeat domain-containing protein [Brasilonema octagenarum].      | GCF_012912125.1 |
| WP_169315756.1 | LRR-repeats+AP-GTPase+COR+TIR*→                                                                                       | LRR-repeats+AP-GTPase+COR+TIR     | 1002 | -        | Bacteroidetes  | Haliscomenobacter hydrossis   | leucine-rich repeat domain-containing protein [Haliscomenobacter hydrossis].  | GCF_000212735.1 |
| WP_169363874.1 | SIG+HIN-HTH→?→?→ LRR-repeats+AP-GTPase+COR+TM+TM*→                                                                    | LRR-repeats+AP-GTPase+COR+TM+TM   | 972  | -        | Cyanobacteria  | Pseudanabaena yagii           | leucine-rich repeat domain-containing protein [Pseudanabaena yagii].          | GCF_012863495.1 |
| WP_169364911.1 | TPR-repeats+CASPASE→?→ PSE→ Cluster54_3clades→ Cluster53_2clades→?→ LRR-repeats+AP-GTPase+COR+CASPASE*→  <-?  ?→ REC→ | LRR-repeats+AP-GTPase+COR+CASPASE | 1239 | -        | Cyanobacteria  | Pseudanabaena yagii           | leucine-rich repeat domain-containing protein [Pseudanabaena yagii].          | GCF_012863495.1 |
| WP_169365210.1 | Pentapeptide-repeats→?→ PolB→?→ LRR-repeats→ LRR-repeats+AP-GTPase+COR*→?→?→  <-?  ?→?→  <-SIG+TM+TM+TM+TM+TM         | LRR-repeats+AP-GTPase+COR         | 682  | -        | Cyanobacteria  | Pseudanabaena yagii           | hypothetical protein [Pseudanabaena yagii].                                   | GCF_012863495.1 |
| WP_169482131.1 | LRR-repeats+AP-GTPase+COR*→  <-?  ?→  <-?<-?<-?<-?<-Cluster1745_2clades                                               | LRR-repeats+AP-GTPase+COR         | 965  | -        | Firmicutes     | Paenibacillus sp. SZ31        | GTP-binding protein [Paenibacillus sp. SZ31].                                 | GCF_012912005.1 |
| WP_169551474.1 | LRR-repeats+AP-GTPase+COR+DrHyd*→  <-?  ?→?→  <-TPR-repeats                                                           | LRR-repeats+AP-GTPase+COR+DrHyd   | 1047 | -        | Bacteroidetes  | Spirosoma sp. CJU-R4          | hypothetical protein [Spirosoma sp. CJU-R4].                                  | GCF_012849055.1 |
| WP_169617268.1 | RelE→ CHTH→?→  <-?<-?<-?<-?  LRR-repeats+AP-GTPase+COR+TIR*→?→  <-?<-?  ?→?→  <-?<-RelE-ParE                          | LRR-repeats+AP-GTPase+COR+TIR     | 1174 | -        | Cyanobacteria  | Nodosilinea sp. P-1105        | leucine-rich repeat domain-containing protein [Nodosilinea sp. P-1105].       | GCF_012911975.1 |



| acc            | operon                                                                                                                  | architecture                      | len  | gen.name | taxend              | species                      | define                                                                           | gca             |
|----------------|-------------------------------------------------------------------------------------------------------------------------|-----------------------------------|------|----------|---------------------|------------------------------|----------------------------------------------------------------------------------|-----------------|
| WP_172187602.1 | Chromo-N+CHROMO→  <-RelE-ParE<-?  ?→ LRR-repeats+AP-GTPase+COR*→?→ SIG+TM+TM+TM+TM+TM+TM+TM+TM+TM+TM+TM+TM→             | LRR-repeats+AP-GTPase+COR         | 913  | -        | Cyanobacteria       | Microcoleus sp. IPMA8        | leucine-rich repeat domain-containing protein [Microcoleus sp. IPMA8].           | GCF_013179805.1 |
| WP_172195227.1 | LRR-repeats+AP-GTPase+COR+TIR*→  <-?  ?→  <-?  NUDIX→?→  <-Arginase                                                     | LRR-repeats+AP-GTPase+COR+TIR     | 1029 | -        | Cyanobacteria       | Brasilonema sennae           | leucine-rich repeat domain-containing protein [Brasilonema sennae].              | GCF_006968745.1 |
| WP_172195319.1 | <-SIG+TM+TM+Calceineurin  ?→?→?→ LRR-repeats+AP-GTPase+COR+TIR*→                                                        | LRR-repeats+AP-GTPase+COR+TIR     | 1330 | -        | Cyanobacteria       | Brasilonema sennae           | leucine-rich repeat domain-containing protein [Brasilonema sennae].              | GCF_006968745.1 |
| WP_172621632.1 | LRR-repeats+AP-GTPase+COR+TIR*→  <-?  ?→?→?→?→  <-?  cNMPBD→                                                            | LRR-repeats+AP-GTPase+COR+TIR     | 975  | -        | Bacteroidetes       | Chitinophaga pinensis        | TIR domain-containing protein [Chitinophaga pinensis].                           | GCF_902167305.1 |
| WP_172622229.1 | LRR-repeats+AP-GTPase+COR+TIR*→  <-?  ?→?→?→?→  <-?  cNMPBD→                                                            | LRR-repeats+AP-GTPase+COR+TIR     | 975  | -        | Bacteroidetes       | Chitinophaga pinensis        | TIR domain-containing protein [Chitinophaga pinensis].                           | GCF_902167325.1 |
| WP_172632369.1 | REC→ LRR-repeats+AP-GTPase+COR*→                                                                                        | LRR-repeats+AP-GTPase+COR         | 1102 | -        | Chloroflexi         | Dictyobacter sp. Uno17       | leucine-rich repeat domain-containing protein [Dictyobacter sp. Uno17].          | GCF_008326305.1 |
| WP_173012781.1 | LRR-repeats+AP-GTPase+COR+TIR*→  <-ParB<-ParA-Soj-PloopNTPase                                                           | LRR-repeats+AP-GTPase+COR+TIR     | 751  | -        | Alphaproteobacteria | Niveispirillum sp. SYP-B3756 | TIR domain-containing protein [Niveispirillum sp. SYP-B3756].                    | GCF_009495745.1 |
| WP_173037887.1 | <-SIG+TM<-?<-ABC-ATPase  ?→?→?→?→ LRR-repeats+AP-GTPase+COR*→                                                           | LRR-repeats+AP-GTPase+COR         | 981  | -        | Actinobacteria      | Phytohabitans flavus         | hypothetical protein [Phytohabitans flavus].                                     | GCF_011764545.1 |
| WP_173124261.1 | Cluster1612_2clades→?→?→  <-?<-?  LRR-repeats+AP-GTPase+COR*→                                                           | LRR-repeats+AP-GTPase+COR         | 1244 | -        | Actinobacteria      | Kibdelosporangium persicum   | leucine-rich repeat domain-containing protein [Kibdelosporangium persicum].      | GCF_013280595.1 |
| WP_173803276.1 | LRR-repeats+AP-GTPase+COR+TIR*→  <-?<-ABC_membrane+ABC_tran  Cyanophycinsyn-ATPgrasp→ Cyanophycinsyn-ATPgrasp→          | LRR-repeats+AP-GTPase+COR+TIR     | 794  | -        | Betaproteobacteria  | Leptothrix sp. C29           | TIR domain-containing protein, partial [Leptothrix sp. C29].                     | GCF_013294065.1 |
| WP_174565117.1 | LRR-repeats+AP-GTPase*→                                                                                                 | LRR-repeats+AP-GTPase             | 485  | -        | Bacteroidetes       | Flavobacterium sp. A45       | leucine-rich repeat domain-containing protein, partial [Flavobacterium sp. A45]. | GCF_002001005.1 |
| WP_174708182.1 | PAS+HISKIN→ REC→?→?→ LRR-repeats+AP-GTPase+COR+DUF4404*→  <-?  ?→?→ ABC_membrane+ABC_tran→ ABC_membrane+ABC_tran→       | LRR-repeats+AP-GTPase+COR+DUF4404 | 1122 | -        | Cyanobacteria       | Nostoc sp. TCL240-02         | leucine-rich repeat domain-containing protein [Nostoc sp. TCL240-02].            | GCF_013343235.1 |
| WP_174708278.1 | ABhydrolase→?→  <-?  LRR-repeats→ PSE→ LRR-repeats+AP-GTPase+COR+TIR*→?→  <-?<-SIG+NUDIX                                | LRR-repeats+AP-GTPase+COR+TIR     | 919  | -        | Cyanobacteria       | Nostoc sp. TCL240-02         | leucine-rich repeat domain-containing protein [Nostoc sp. TCL240-02].            | GCF_013343235.1 |
| WP_174709624.1 | <-Arginase<-?  LRR-repeats+AP-GTPase+COR+TIR→ LRR-repeats+AP-GTPase+COR+TIR→?→  <-ABC-ATPase                            | LRR-repeats+AP-GTPase+COR+TIR     | 1126 | -        | Cyanobacteria       | Nostoc sp. TCL240-02         | leucine-rich repeat domain-containing protein [Nostoc sp. TCL240-02].            | GCF_013343235.1 |
| WP_174709625.1 | LRR-repeats+AP-GTPase+COR+TIR*→                                                                                         | LRR-repeats+AP-GTPase+COR+TIR     | 1123 | -        | Cyanobacteria       | Nostoc sp. TCL240-02         | leucine-rich repeat domain-containing protein [Nostoc sp. TCL240-02].            | GCF_013343235.1 |
| WP_174711091.1 | LRR-repeats+AP-GTPase+COR*→                                                                                             | LRR-repeats+AP-GTPase+COR         | 1189 | -        | Cyanobacteria       | Nostoc sp. TCL240-02         | leucine-rich repeat domain-containing protein [Nostoc sp. TCL240-02].            | GCF_013343235.1 |
| WP_174712042.1 | LRR-repeats+AP-GTPase+COR*→?→  <-?  ?→  <-?  ?→ ClpABN-AAA+ClpABC-AAA→                                                  | LRR-repeats+AP-GTPase+COR         | 967  | -        | Cyanobacteria       | Nostoc sp. TCL240-02         | leucine-rich repeat domain-containing protein [Nostoc sp. TCL240-02].            | GCF_013343235.1 |
| WP_175357678.1 | Cluster54_3clades→?→ RelE-ParE→ Cluster53_2clades→?→ LRR-repeats+AP-GTPase+COR*→?→?→?→  <-?  ?→  <-Pentapeptide-repeats | LRR-repeats+AP-GTPase+COR         | 928  | -        | Cyanobacteria       | Pseudanabaena biceps         | leucine-rich repeat domain-containing protein [Pseudanabaena biceps].            | GCF_013361095.1 |
| WP_175471885.1 | Mbetalac→?→ LRR-repeats+AP-GTPase+COR*→  <-?<-ICLR-HTH  ?→?→?→ ABhydrolase→                                             | LRR-repeats+AP-GTPase+COR         | 886  | -        | Actinobacteria      | Geodermatophilus telluris    | hypothetical protein [Geodermatophilus telluris].                                | GCF_900102745.1 |





| acc            | operon                                                                                                                                        | architecture                      | len  | gen.name | taxend         | species                      | define                                                                             | gca             |
|----------------|-----------------------------------------------------------------------------------------------------------------------------------------------|-----------------------------------|------|----------|----------------|------------------------------|------------------------------------------------------------------------------------|-----------------|
| WP_184831163.1 | SIG+TM+TM+TM+TM+TM+TM->  <?  ?->?->?-> PSE->                                                                                                  | LRR-repeats+AP-GTPase+COR         | 802  | -        | Actinobacteria | Alloctelliglobospora scoriae | hypothetical protein [Alloctelliglobospora scoriae].                               | GCF_014204945.1 |
| WP_184846103.1 | LRR-repeats+AP-GTPase+COR*->  <?<?  wHTH-4stranded+TPRs+APATPase+TPR-repeats-><br>LRR-repeats+AP-GTPase+COR*->  <?<?<?<-BACTERIALFRINGE+TM+TM | LRR-repeats+AP-GTPase+COR         | 1247 | -        | Actinobacteria | Alloctelliglobospora scoriae | leucine-rich repeat domain-containing protein [Alloctelliglobospora scoriae].      | GCF_014204945.1 |
| WP_184892074.1 | LRR-repeats+AP-GTPase+COR*->?->?-> REC-> HISKIN->                                                                                             | LRR-repeats+AP-GTPase+COR         | 1463 | -        | Actinobacteria | Streptomyces scabiei         | leucine-rich repeat domain-containing protein [Streptomyces scabiei].              | GCF_014203845.1 |
| WP_184930759.1 | LRR-repeats+AP-GTPase+COR*->                                                                                                                  | LRR-repeats+AP-GTPase+COR         | 954  | -        | Actinobacteria | Streptomyces sp. SFB5A       | hypothetical protein [Streptomyces sp. SFB5A].                                     | GCF_014203895.1 |
| WP_184953474.1 | GNTR-HTH->  <?  REC-> REC->?-> LRR-repeats+AP-GTPase+COR+TIR*->  <-35exo                                                                      | LRR-repeats+AP-GTPase+COR+TIR     | 1043 | -        | Actinobacteria | Actinoplanes abujensis       | TIR domain-containing protein [Actinoplanes abujensis].                            | GCF_016861995.1 |
| WP_185097769.1 | LRR-repeats+AP-GTPase+COR*->                                                                                                                  | LRR-repeats+AP-GTPase+COR         | 901  | -        | Bacteroidetes  | Elizabethkingia anophelis    | leucine-rich repeat domain-containing protein [Elizabethkingia anophelis].         | GCF_001703835.1 |
| WP_185204695.1 | Cluster1364_2clades->?->?->?->?->?-> LRR-repeats+AP-GTPase+COR*->  <-Cyanophycinsyn-ATPgrasp                                                  | LRR-repeats+AP-GTPase+COR         | 1038 | -        | Bacteroidetes  | Chryseobacterium sp. C3      | leucine-rich repeat protein [Chryseobacterium sp. C3].                             | GCF_014218905.1 |
| WP_185236942.1 | LRR-repeats+AP-GTPase+COR+TM+TM*->                                                                                                            | LRR-repeats+AP-GTPase+COR+TM+TM   | 828  | -        | Cyanobacteria  | Microcystis aeruginosa       | leucine-rich repeat protein [Microcystis aeruginosa].                              | GCF_014218745.1 |
| WP_185240111.1 | SAM-methylase->?->  <?<-SIG+TPM_phosphatase+TM+TM+TM  LRR-repeats+AP-GTPase+COR+TM+TM*->  <?<-?<-?  ?->  <-Pro_CA                             | LRR-repeats+AP-GTPase+COR+TM+TM   | 874  | -        | Cyanobacteria  | Microcystis aeruginosa       | leucine-rich repeat protein [Microcystis aeruginosa].                              | GCF_014218765.1 |
| WP_185478866.1 | <-Cluster5_5clades  LRR-repeats+AP-GTPase+COR+DUF4404*->                                                                                      | LRR-repeats+AP-GTPase+COR+DUF4404 | 1084 | -        | Cyanobacteria  | Trichormus variabilis        | leucine-rich repeat domain-containing protein [Trichormus variabilis].             | GCF_014222125.1 |
| WP_185479669.1 | LRR-repeats+AP-GTPase+COR+DUF4404*->  <?<-ABC-ATPase<-?  ?->  <-REC                                                                           | LRR-repeats+AP-GTPase+COR+DUF4404 | 866  | -        | Cyanobacteria  | Trichormus variabilis        | leucine-rich repeat domain-containing protein, partial [Trichormus variabilis].    | GCF_014222155.1 |
| WP_185482851.1 | <-Cluster5_5clades  LRR-repeats+AP-GTPase+COR+DUF4404*->  <?<-ABC-ATPase<-?  ?->  <-REC                                                       | LRR-repeats+AP-GTPase+COR+DUF4404 | 1084 | -        | Cyanobacteria  | Trichormus variabilis        | leucine-rich repeat domain-containing protein [Trichormus variabilis].             | GCF_014222225.1 |
| WP_185499823.1 | <-Cluster5_5clades  LRR-repeats+AP-GTPase+COR+DUF4404*->  <?<-ABC-ATPase<-?  ?->  <-REC                                                       | LRR-repeats+AP-GTPase+COR+DUF4404 | 1199 | -        | Cyanobacteria  | Trichormus variabilis        | leucine-rich repeat domain-containing protein [Trichormus variabilis].             | GCF_014222145.1 |
| WP_185505742.1 | <-Cluster5_5clades  LRR-repeats+AP-GTPase+COR+DUF4404*->  <?<-ABC-ATPase<-?  ?->  <-REC                                                       | LRR-repeats+AP-GTPase+COR+DUF4404 | 992  | -        | Cyanobacteria  | Trichormus variabilis        | leucine-rich repeat domain-containing protein [Trichormus variabilis].             | GCF_014222245.1 |
| WP_185539469.1 | LRR-repeats+AP-GTPase+COR+DUF4404*->  <?<-ABC-ATPase<-?  ?->  <-REC                                                                           | LRR-repeats+AP-GTPase+COR+DUF4404 | 895  | -        | Cyanobacteria  | Trichormus variabilis        | leucine-rich repeat domain-containing protein, partial [Trichormus variabilis].    | GCF_014222135.1 |
| WP_185567106.1 | LRR-repeats+AP-GTPase+COR+TM+TM*->  <-CASPASe+TM                                                                                              | LRR-repeats+AP-GTPase+COR+TM+TM   | 862  | -        | Cyanobacteria  | Nostoc sp. 2RC               | leucine-rich repeat domain-containing protein [Nostoc sp. 2RC].                    | GCF_014222165.1 |
| WP_185570121.1 | PIN-> LRR-repeats+AP-GTPase+COR+TIR*->                                                                                                        | LRR-repeats+AP-GTPase+COR+TIR     | 1020 | -        | Cyanobacteria  | Nostoc sp. 2RC               | leucine-rich repeat domain-containing protein [Nostoc sp. 2RC].                    | GCF_014222165.1 |
| WP_185579937.1 | ABhydrolase->?->  <?  COR+TIR-> LRR-repeats+AP-GTPase+COR+TIR*->?->  <-PIN<-?<-?<-SIG+NUDIX                                                   | LRR-repeats+AP-GTPase+COR+TIR     | 1003 | -        | Cyanobacteria  | unclassified Nostoc          | MULTISPECIES: leucine-rich repeat domain-containing protein [unclassified Nostoc]. | GCF_014222255.1 |
| WP_185580380.1 | Cluster5_5clades-> LRR-repeats+AP-GTPase+COR+TIR*->  <-CASPASe+TM                                                                             | LRR-repeats+AP-GTPase+COR+TIR     | 893  | -        | Cyanobacteria  | unclassified Nostoc          | MULTISPECIES: leucine-rich repeat domain-containing protein [unclassified Nostoc]. | GCF_014222255.1 |



| acc            | operon                                                                                                                      | architecture                      | len  | gen.name | taxend              | species                 | define                                                                      | gca             |
|----------------|-----------------------------------------------------------------------------------------------------------------------------|-----------------------------------|------|----------|---------------------|-------------------------|-----------------------------------------------------------------------------|-----------------|
| WP_185583983.1 | <-PIN<-?<-?  ?->?>  <-Arginase<-?  LRR-repeats+AP-GTPase+COR*->                                                             | LRR-repeats+AP-GTPase+COR         | 358  | -        | Cyanobacteria       | Nostoc sp. UCD120       | leucine-rich repeat domain-containing protein, partial [Nostoc sp. UCD120]. | GCF_014222255.1 |
| WP_185584434.1 | PAS+HISKIN-> REC-> PSE->?->?-> LRR-repeats+AP-GTPase+COR+TIR*->                                                             | LRR-repeats+AP-GTPase+COR+TIR     | 1163 | -        | Cyanobacteria       | Nostoc sp. UCD120       | leucine-rich repeat domain-containing protein [Nostoc sp. UCD120].          | GCF_014222255.1 |
| WP_185591915.1 | <-PIN<-?<-?  ?->?>  <-Arginase<-?  LRR-repeats+AP-GTPase+COR+TIR*->                                                         | LRR-repeats+AP-GTPase+COR+TIR     | 802  | -        | Cyanobacteria       | Nostoc sp. UCD122       | leucine-rich repeat domain-containing protein [Nostoc sp. UCD122].          | GCF_014222275.1 |
| WP_185592013.1 | ABhydrolase->?>  <-?  COR+TIR-> LRR-repeats+AP-GTPase+COR+TIR*->?>  <-PIN                                                   | LRR-repeats+AP-GTPase+COR+TIR     | 1003 | -        | Cyanobacteria       | Nostoc sp. UCD122       | leucine-rich repeat domain-containing protein [Nostoc sp. UCD122].          | GCF_014222275.1 |
| WP_185592050.1 | LRR-repeats+AP-GTPase+COR+TIR*->                                                                                            | LRR-repeats+AP-GTPase+COR+TIR     | 859  | -        | Cyanobacteria       | Nostoc sp. UCD122       | leucine-rich repeat domain-containing protein, partial [Nostoc sp. UCD122]. | GCF_014222275.1 |
| WP_185592512.1 | Cluster5_5clades-> LRR-repeats+AP-GTPase+COR+TIR*->  <-CASPASE+TM                                                           | LRR-repeats+AP-GTPase+COR+TIR     | 893  | -        | Cyanobacteria       | Nostoc sp. UCD122       | leucine-rich repeat domain-containing protein [Nostoc sp. UCD122].          | GCF_014222275.1 |
| WP_185607149.1 | <-PIN<-?<-?  ?->?>  <-Arginase<-?  LRR-repeats+AP-GTPase+COR+TIR*->                                                         | LRR-repeats+AP-GTPase+COR+TIR     | 825  | -        | Cyanobacteria       | Nostoc sp. UCD121       | leucine-rich repeat domain-containing protein [Nostoc sp. UCD121].          | GCF_014222285.1 |
| WP_185607288.1 | LRR-repeats+AP-GTPase+COR+TIR*->?->?-> ABC_membrane+ABC_tran-> ABC_membrane+ABC_tran->                                      | LRR-repeats+AP-GTPase+COR+TIR     | 917  | -        | Cyanobacteria       | Nostoc sp. UCD121       | leucine-rich repeat domain-containing protein, partial [Nostoc sp. UCD121]. | GCF_014222285.1 |
| WP_186435859.1 | <-Cluster1077_2clades  Aminotran_1_2->?>  <-?<-?  ?-> LRR-repeats+AP-GTPase+COR*->                                          | LRR-repeats+AP-GTPase+COR         | 980  | -        | Gammaproteobacteria | Thalassolituus sp. C2-1 | GTP-binding protein [Thalassolituus sp. C2-1].                              | GCF_007785795.1 |
| WP_186890728.1 | <-Cluster1951_2clades<-?<-?  ?-> SIG+TM+TM+TM+HISKIN->?>  <-?  LRR-repeats+AP-GTPase+COR+DrHyd*->  <-?<-REC                 | LRR-repeats+AP-GTPase+COR+DrHyd   | 1036 | -        | Betaproteobacteria  | Undibacterium amnicola  | hypothetical protein [Undibacterium amnicola].                              | GCF_014284275.1 |
| WP_186956531.1 | LRR-repeats+AP-GTPase+COR+TIR*->                                                                                            | LRR-repeats+AP-GTPase+COR+TIR     | 1232 | -        | Betaproteobacteria  | Undibacterium sp. NL8W  | leucine-rich repeat domain-containing protein [Undibacterium sp. NL8W].     | GCF_014284125.1 |
| WP_187308183.1 | LRR-repeats+AP-GTPase+COR+TM+TM*->  <-?<-?  ?->?>  <-?<-?<-SNF                                                              | LRR-repeats+AP-GTPase+COR+TM+TM   | 720  | -        | Cyanobacteria       | Nostoc cycadae          | leucine-rich repeat domain-containing protein, partial [Nostoc cycadae].    | GCF_002897135.1 |
| WP_187315132.1 | LRR-repeats+AP-GTPase+COR*->?->?->  <-?<-tRNA<-?<-?<-Cluster1829_2clades                                                    | LRR-repeats+AP-GTPase+COR         | 914  | -        | Bacteroidetes       | Hymenobacter sp. BT190  | GTP-binding protein [Hymenobacter sp. BT190].                               | GCF_014333525.1 |
| WP_187466435.1 | LRR-repeats+AP-GTPase+COR+EAD11->?->?> LRR-repeats+AP-GTPase+COR+EAD11->                                                    | LRR-repeats+AP-GTPase+COR+EAD11   | 1040 | -        | Bacteroidetes       | Lewinella lacunae       | leucine-rich repeat domain-containing protein [Lewinella lacunae].          | GCF_014349155.1 |
| WP_187466438.1 | LRR-repeats+AP-GTPase+COR+EAD11*->                                                                                          | LRR-repeats+AP-GTPase+COR+EAD11   | 931  | -        | Bacteroidetes       | Lewinella lacunae       | leucine-rich repeat domain-containing protein [Lewinella lacunae].          | GCF_014349155.1 |
| WP_187467589.1 | GTPase-AIG->  <-?  ?->?>  <-?<-?<-?  LRR-repeats+AP-GTPase+COR+CASPASE*->?> FGS->?> RVT->?> FGS->                           | LRR-repeats+AP-GTPase+COR+CASPASE | 1063 | -        | Bacteroidetes       | Lewinella lacunae       | CHAT domain-containing protein [Lewinella lacunae].                         | GCF_014349155.1 |
| WP_187560609.1 | SIGMA-HTH->?> RADICAL-SAM-> LRR-repeats+AP-GTPase+COR+TIR*->?> HISKIN->                                                     | LRR-repeats+AP-GTPase+COR+TIR     | 970  | -        | Bacteroidetes       | Kordia sp. YSTF-M3      | leucine-rich repeat domain-containing protein [Kordia sp. YSTF-M3].         | GCF_014397005.1 |
| WP_18775535.1  | HTH->?>?> LRR-repeats+AP-GTPase+COR+TIR*->  <-?<-ABC_membrane+ABC_tran  Cyanophycinsyn-ATPgrasp-> Cyanophycinsyn-ATPgrasp-> | LRR-repeats+AP-GTPase+COR+TIR     | 1298 | -        | Betaproteobacteria  | Sphaerotilus natans     | leucine-rich repeat domain-containing protein [Sphaerotilus natans].        | GCF_008329925.1 |

Gene neighborhoods and domain architectures of APGTPases whose LRR domains are either absent or not detected

| acc        | operon                                                                                | architecture          | len  | gen.name     | taxend              | species                         | define                                                                                                             | gca             |
|------------|---------------------------------------------------------------------------------------|-----------------------|------|--------------|---------------------|---------------------------------|--------------------------------------------------------------------------------------------------------------------|-----------------|
| AAP36207.1 | AP-GTPase*→                                                                           | AP-GTPase             | 220  | -            | -                   | synthetic construct             | Homo sapiens RAB3D, member RAS oncogene family, partial [synthetic construct].                                     | -               |
| AAP36967.1 | AP-GTPase*→                                                                           | AP-GTPase             | 208  | -            | -                   | synthetic construct             | Homo sapiens mel transforming oncogene (derived from cell line NK14)- RAB8 homolog, partial [synthetic construct]. | -               |
| AAV38505.1 | AP-GTPase*→                                                                           | AP-GTPase             | 204  | -            | -                   | synthetic construct             | RAB13, member RAS oncogene family, partial [synthetic construct].                                                  | -               |
| AAX32379.1 | AP-GTPase*→                                                                           | AP-GTPase             | 207  | MEL          | -                   | synthetic construct             | RAB8A [synthetic construct].                                                                                       | -               |
| AAX36766.1 | AP-GTPase*→                                                                           | AP-GTPase             | 204  | RAB13        | -                   | synthetic construct             | RAB13 member RAS oncogene family, partial [synthetic construct].                                                   | -               |
| AAX41198.1 | AP-GTPase*→                                                                           | AP-GTPase             | 203  | RAB13        | -                   | synthetic construct             | RAB13 member RAS oncogene family [synthetic construct].                                                            | -               |
| AAX42776.1 | AP-GTPase*→                                                                           | AP-GTPase             | 204  | RAB13        | -                   | synthetic construct             | RAB13 member RAS oncogene family, partial [synthetic construct].                                                   | -               |
| ABG50724.1 | vWA-L+AP-GTPase+COR*→                                                                 | vWA-L+AP-GTPase+COR   | 748  | Tery_1428    | Cyanobacteria       | Trichodesmium erythraeum IMS101 | Miro-like [Trichodesmium erythraeum IMS101].                                                                       | GCA_000014265.1 |
| ABW29719.1 | AP-GTPase+ZNR*→                                                                       | AP-GTPase+ZNR         | 705  | AM1_4747     | Cyanobacteria       | Acaryochloris marina MBIC11017  | conserved hypothetical protein [Acaryochloris marina MBIC11017].                                                   | GCA_000018105.1 |
| ACL85629.1 | AP-GTPase*→                                                                           | AP-GTPase             | 204  | Rab10        | -                   | Drosophila melanogaster         | Rab10-PA, partial [synthetic construct].                                                                           | -               |
| ACL86538.1 | AP-GTPase*→                                                                           | AP-GTPase             | 223  | Rab30        | -                   | Drosophila melanogaster         | Rab30-PA, partial [synthetic construct].                                                                           | -               |
| ADQ32831.1 | AP-GTPase*→                                                                           | AP-GTPase             | 219  | RAB3B        | -                   | Homo sapiens                    | RAB3B, member RAS oncogene family, partial [synthetic construct].                                                  | -               |
| AFZ01290.1 | <-EAD10+VMAP-M1+VMAP-C  ?→ CASPASE+EAD10→ EAD10+VMAP-M1+VMAP-C→?→ VWA+AP-GTPase+COR*→ | VWA+AP-GTPase+COR     | 1196 | Cal6303_2274 | Cyanobacteria       | Calothrix sp. PCC 6303          | Miro domain protein [Calothrix sp. PCC 6303].                                                                      | GCA_000317435.1 |
| AIC55004.1 | AP-GTPase*→                                                                           | AP-GTPase             | 219  | -            | -                   | Homo sapiens                    | RAB3B, partial [synthetic construct].                                                                              | -               |
| AIC55612.1 | AP-GTPase*→                                                                           | AP-GTPase             | 219  | -            | -                   | Homo sapiens                    | RAB3D, partial [synthetic construct].                                                                              | -               |
| ASF48224.1 | AP-GTPase+COR+DUF4404*→                                                               | AP-GTPase+COR+DUF4404 | 879  | CEK71_20365  | Gammaproteobacteria | Methylovulum psychrotolerans    | hypothetical protein CEK71_20365 [Methylovulum psychrotolerans].                                                   | GCA_002209385.1 |
| ATO96390.1 | AP-GTPase*→                                                                           | AP-GTPase             | 207  | rab8b        | -                   | Xenopus tropicalis              | RAB8B, member RAS oncoprotein family, partial [synthetic construct].                                               | -               |

| acc          | operon                                                 | architecture                  | len  | gen.name        | taxend                | species                            | defline                                                                        | gca             |
|--------------|--------------------------------------------------------|-------------------------------|------|-----------------|-----------------------|------------------------------------|--------------------------------------------------------------------------------|-----------------|
| CCQ62557.1   | AP-GTPase+COR*→                                        | AP-GTPase+COR                 | 279  | CWATWH0401_4507 | Cyanobacteria         | Crocospaera watsonii WH 0401       | Leucine-rich repeat [Crocospaera watsonii WH 0401].                            | GCA_001039615.1 |
| CCZ82707.1   | AP-GTPase+COR*→                                        | AP-GTPase+COR                 | 843  | BN709_01979     | Bacteroidetes         | Odoribacter laneus CAG:561         | putative uncharacterized protein [Odoribacter laneus CAG:561].                 | GCA_000432935.1 |
| HAA12500.1   | AP-GTPase+COR*→                                        | AP-GTPase+COR                 | 908  | DCE41_12685     | Bacteroidetes         | Cytophagales bacterium             | TPA: hypothetical protein DCE41_12685 [Cytophagales bacterium].                | GCA_003444355.1 |
| HAA13307.1   | AP-GTPase+COR*→                                        | AP-GTPase+COR                 | 878  | DCE41_17110     | Bacteroidetes         | Cytophagales bacterium             | TPA: hypothetical protein DCE41_17110 [Cytophagales bacterium].                | GCA_003444355.1 |
| HAC65063.1   | DNAJ→ AP-GTPase*→ COR+TM+TM→                           | AP-GTPase                     | 125  | DCF68_16430     | Cyanobacteria         | Cyanothece sp. UBA12306            | TPA: GTPase, partial [Cyanothece sp. UBA12306].                                | GCA_003448685.1 |
| HAK76392.1   | AP-GTPase+COR*→                                        | AP-GTPase+COR                 | 733  | DCM71_05675     | Bacteroidetes         | Runella sp.                        | TPA: hypothetical protein DCM71_05675, partial [Runella sp.].                  | GCA_003452005.1 |
| HAO21703.1   | AP-GTPase*→                                            | AP-GTPase                     | 569  | DCQ37_15290     | Deltaproteobacteria   | Desulfobacteraceae bacterium       | TPA: hypothetical protein DCQ37_15290, partial [Desulfobacteraceae bacterium]. | GCA_003456735.1 |
| HAP58612.1   | AP-GTPase+COR*→                                        | AP-GTPase+COR                 | 696  | DCR93_03550     | Bacteroidetes         | Cytophagales bacterium             | TPA: hypothetical protein DCR93_03550, partial [Cytophagales bacterium].       | GCA_003454975.1 |
| HAP62400.1   | AP-GTPase+COR*→?→ cNMPBD→ SIG+Phytase-like→            | AP-GTPase+COR                 | 744  | DCR93_23850     | Bacteroidetes         | Cytophagales bacterium             | TPA: hypothetical protein DCR93_23850 [Cytophagales bacterium].                | GCA_003454975.1 |
| HCS91914.1   | TIR+BetaPropeller+AP-GTPase*→                          | TIR+BetaPropeller+AP-GTPase   | 1236 | DIW77_18260     | Gammaproteobacteria   | Chromatiaceae bacterium            | TPA: hypothetical protein DIW77_18260 [Chromatiaceae bacterium].               | GCA_003525925.1 |
| HEY83669.1   | AP-GTPase+COR*→                                        | AP-GTPase+COR                 | 260  | G4N96_00950     | Chloroflexi           | Chloroflexi bacterium              | TPA: hypothetical protein G4N96_00950 [Chloroflexi bacterium].                 | GCA_011192195.1 |
| HEY85168.1   | AP-GTPase*→                                            | AP-GTPase                     | 319  | G4N96_08685     | Chloroflexi           | Chloroflexi bacterium              | TPA: hypothetical protein G4N96_08685 [Chloroflexi bacterium].                 | GCA_011192195.1 |
| HFS11412.1   | BetaPropeller+AP-GTPase+TIR*→?→  <-?  ?→?→  <-SIG+PSBP | BetaPropeller+AP-GTPase+TIR   | 1179 | ENR14_24625     | Cyanobacteria         | Anabaena sp.                       | TPA: TIR domain-containing protein [Anabaena sp.].                             | GCA_011332035.1 |
| HGZ32338.1   | AP-GTPase+COR*→                                        | AP-GTPase+COR                 | 503  | ENR17_19310     | Bacteroidetes         | Bacteroidetes bacterium            | TPA: GTPase, partial [Bacteroidetes bacterium].                                | GCA_011331955.1 |
| HHN34802.1   | AP-GTPase*→                                            | AP-GTPase                     | 171  | ENM07_01585     | Bacteroidetes         | Bacteroidetes bacterium            | TPA: GTP-binding protein [Bacteroidetes bacterium].                            | GCA_011375975.1 |
| KAB2958401.1 | SIG+AP-GTPase+COR*→                                    | SIG+AP-GTPase+COR             | 688  | F9K13_13725     | Bacteria              | Candidatus Methyloirabilis oxyfera | hypothetical protein F9K13_13725 [Candidatus Methyloirabilis oxyfera].         | GCA_009026205.1 |
| KAF0250167.1 | AP-GTPase+COR+Calcineurin+FGS*→                        | AP-GTPase+COR+Calcineurin+FGS | 1237 | FD167_433       | unclassified Bacteria | bacterium                          | small GTP-binding protein, partial [bacterium].                                | GCA_009773835.1 |
| KHD09711.1   | AP-GTPase+COR*→                                        | AP-GTPase+COR                 | 530  | PN36_20855      | Gammaproteobacteria   | Candidatus Thiomargarita nelsonii  | hypothetical protein PN36_20855 [Candidatus Thiomargarita nelsonii].           | GCA_000785145.2 |
| MBC6419378.1 | AP-GTPase*→ COR→                                       | AP-GTPase                     | 165  | GDA44_11670     | Cyanobacteria         | Prochloron sp. SP5CPC1             | hypothetical protein GDA44_11670 [Prochloron sp. SP5CPC1].                     | GCA_014323965.1 |

| acc        | operon                                                                                                                                            | architecture                | len  | gen.name    | taxend              | species                                 | define                                                                     | gca             |
|------------|---------------------------------------------------------------------------------------------------------------------------------------------------|-----------------------------|------|-------------|---------------------|-----------------------------------------|----------------------------------------------------------------------------|-----------------|
| NAT10406.1 | AP-GTPase*→                                                                                                                                       | AP-GTPase                   | 611  | C4E22_02470 | Euryarchaeota       | ANME-1 cluster archaeon AG-394-G06      | hypothetical protein C4E22_02470 [ANME-1 cluster archaeon AG-394-G06].     | GCA_009903405.1 |
| NBO93394.1 | AP-GTPase+COR*→                                                                                                                                   | AP-GTPase+COR               | 916  | EBV06_13945 | Planctomycetes      | Planctomycetia bacterium                | hypothetical protein EBV06_13945 [Planctomycetia bacterium].               | GCA_009918525.1 |
| NBQ70341.1 | TIR+AP-GTPase+COR*→                                                                                                                               | TIR+AP-GTPase+COR           | 582  | EBU46_16510 | Betaproteobacteria  | Nitrosomonadaceae bacterium             | TIR domain-containing protein, partial [Nitrosomonadaceae bacterium].      | GCA_009919685.1 |
| NHJ32288.1 | AP-GTPase*→                                                                                                                                       | AP-GTPase                   | 230  | FK732_05460 | Asgard group        | Asgard group archaeon                   | GTP-binding protein [Asgard group archaeon].                               | GCA_011366225.1 |
| NIM12342.1 | TIR+BetaPropeller+AP-GTPase*→                                                                                                                     | TIR+BetaPropeller+AP-GTPase | 1000 | GTO81_10200 | Bacteria            | Candidatus Aminicenantes bacterium      | DUF4365 domain-containing protein [Candidatus Aminicenantes bacterium].    | GCA_011771225.1 |
| NIM12946.1 | TIR+BetaPropeller+AP-GTPase*→                                                                                                                     | TIR+BetaPropeller+AP-GTPase | 1108 | GTO81_13270 | Bacteria            | Candidatus Aminicenantes bacterium      | TIR domain-containing protein [Candidatus Aminicenantes bacterium].        | GCA_011771225.1 |
| NIR05736.1 | TIR+BetaPropeller+AP-GTPase*→ Cluster2387_2clades→ Cluster2274_2clades→  <-Cluster2216_2clades  Cluster2371_2clades→  <-?<-?<-Cluster2251_2clades | TIR+BetaPropeller+AP-GTPase | 1004 | GTN82_09930 | Bacteria            | Candidatus Aminicenantes bacterium      | DUF4365 domain-containing protein [Candidatus Aminicenantes bacterium].    | GCA_011773265.1 |
| NJL71192.1 | AP-GTPase*→                                                                                                                                       | AP-GTPase                   | 248  | HC888_06030 | Gammaproteobacteria | Candidatus Competibacteraceae bacterium | GTP-binding protein [Candidatus Competibacteraceae bacterium].             | GCA_012031515.1 |
| NJO13505.1 | AP-GTPase*→?→ TIR→                                                                                                                                | AP-GTPase                   | 144  | HC872_08630 | Gammaproteobacteria | Gammaproteobacteria bacterium           | hypothetical protein HC872_08630 [Gammaproteobacteria bacterium].          | GCA_012032615.1 |
| NKB62496.1 | AP-GTPase+COR*→                                                                                                                                   | AP-GTPase+COR               | 274  | GKR95_10365 | Gammaproteobacteria | Gammaproteobacteria bacterium           | hypothetical protein GKR95_10365 [Gammaproteobacteria bacterium].          | GCA_012103415.1 |
| NLZ73760.1 | AP-GTPase*→                                                                                                                                       | AP-GTPase                   | 202  | GX905_08105 | Bacteroidetes       | Bacteroidales bacterium                 | hypothetical protein GX905_08105 [Bacteroidales bacterium].                | GCA_012800615.1 |
| NMC05010.1 | AP-GTPase*→                                                                                                                                       | AP-GTPase                   | 190  | GYA24_07360 | Asgard group        | Candidatus Lokiarchaeota archaeon       | GTP-binding protein [Candidatus Lokiarchaeota archaeon].                   | GCA_012798355.1 |
| NNJ85485.1 | AP-GTPase*→                                                                                                                                       | AP-GTPase                   | 345  | HKP13_11240 | Gammaproteobacteria | Gammaproteobacteria bacterium           | hypothetical protein HKP13_11240, partial [Gammaproteobacteria bacterium]. | GCA_013042035.1 |
| NOQ28062.1 | AP-GTPase+COR*→                                                                                                                                   | AP-GTPase+COR               | 845  | GQ564_22090 | Bacteroidetes       | Bacteroidales bacterium                 | hypothetical protein GQ564_22090 [Bacteroidales bacterium].                | GCA_013138975.1 |
| NOS87668.1 | AP-GTPase+COR+DUF4404*→ REase→                                                                                                                    | AP-GTPase+COR+DUF4404       | 775  | HOP34_03865 | Gammaproteobacteria | Methylococcaceae bacterium              | hypothetical protein HOP34_03865, partial [Methylococcaceae bacterium].    | GCA_013140465.1 |
| NOT02643.1 | AP-GTPase+COR*→                                                                                                                                   | AP-GTPase+COR               | 1127 | HOP29_18715 | Planctomycetes      | Phycisphaerales bacterium               | hypothetical protein HOP29_18715 [Phycisphaerales bacterium].              | GCA_013140575.1 |
| NOT61891.1 | TIR+BetaPropeller+AP-GTPase*→                                                                                                                     | TIR+BetaPropeller+AP-GTPase | 1134 | HOP19_16880 | Acidobacteria       | Acidobacteria bacterium                 | TIR domain-containing protein [Acidobacteria bacterium].                   | GCA_013140935.1 |

| acc        | operon                                       | architecture                        | len  | gen.name       | taxend              | species                                    | define                                                                         | gca             |
|------------|----------------------------------------------|-------------------------------------|------|----------------|---------------------|--------------------------------------------|--------------------------------------------------------------------------------|-----------------|
| NOU19042.1 | AP-GTPase+COR*→                              | AP-GTPase+COR                       | 850  | HOO91_15910    | Bacteroidetes       | Bacteroidales bacterium                    | hypothetical protein HOO91_15910 [Bacteroidales bacterium].                    | GCA_013141385.1 |
| NOY42283.1 | AP-GTPase+COR*→                              | AP-GTPase+COR                       | 659  | GXP26_10655    | Planctomycetes      | Planctomycetes bacterium                   | hypothetical protein GXP26_10655 [Planctomycetes bacterium].                   | GCA_013152205.1 |
| NOY62616.1 | AP-GTPase+COR+DUF4404*→                      | AP-GTPase+COR+DUF4404               | 555  | GXP10_05565    | Gammaproteobacteria | Gammaproteobacteria bacterium              | hypothetical protein GXP10_05565, partial [Gammaproteobacteria bacterium].     | GCA_013152295.1 |
| NPE06693.1 | AP-GTPase*→                                  | AP-GTPase                           | 212  | GNW80_00285    | Asgard group        | Asgard group archaeon                      | GTP-binding protein [Asgard group archaeon].                                   | GCA_013166835.1 |
| NQT13008.1 | TIR+BetaPropeller+AP-GTPase*→                | TIR+BetaPropeller+AP-GTPase         | 698  | HQ582_09690    | Planctomycetes      | Planctomycetes bacterium                   | TIR domain-containing protein, partial [Planctomycetes bacterium].             | GCA_013202485.1 |
| NQU22914.1 | AP-GTPase*→                                  | AP-GTPase                           | 350  | HQ567_16680    | Bacteria            | Candidatus Nealsobacteria bacterium        | hypothetical protein HQ567_16680 [Candidatus Nealsobacteria bacterium].        | GCA_013202865.1 |
| NQZ10247.1 | AP-GTPase+COR*→                              | AP-GTPase+COR                       | 798  | HRT35_24105    | Gammaproteobacteria | Algicola sp.                               | hypothetical protein HRT35_24105 [Algicola sp.].                               | GCA_013216025.1 |
| NQZ12034.1 | AP-GTPase+COR*→                              | AP-GTPase+COR                       | 875  | HRT35_33190    | Gammaproteobacteria | Algicola sp.                               | hypothetical protein HRT35_33190 [Algicola sp.].                               | GCA_013216025.1 |
| NTV51179.1 | SIG+ZetaToxin→ TIR+BetaPropeller+AP-GTPase*→ | TIR+BetaPropeller+AP-GTPase         | 1151 | HGA20_16230    | Deltaproteobacteria | Geobacteraceae bacterium                   | TIR domain-containing protein [Geobacteraceae bacterium].                      | GCA_013336525.1 |
| NUN13817.1 | BetaPropeller+AP-GTPase+Calcineurin*→        | BetaPropeller+AP-GTPase+Calcineurin | 1598 | HUU55_09280    | Deltaproteobacteria | Myxococcales bacterium                     | metallophosphoesterase [Myxococcales bacterium].                               | GCA_013360285.1 |
| NVO09097.1 | AP-GTPase+COR*→                              | AP-GTPase+COR                       | 866  | HXX16_03955    | Bacteroidetes       | Bacteroidales bacterium                    | 50S ribosome-binding GTPase [Bacteroidales bacterium].                         | GCA_013376985.1 |
| OHD42862.1 | AP-GTPase+COR+DrHyd*→                        | AP-GTPase+COR+DrHyd                 | 671  | A2086_15900    | Spirochaetes        | Spirochaetes bacterium GWD1_27_9           | hypothetical protein A2086_15900 [Spirochaetes bacterium GWD1_27_9].           | GCA_001830585.1 |
| OLS14677.1 | AP-GTPase*→                                  | AP-GTPase                           | 170  | RBG13Loki_1719 | Asgard group        | Candidatus Lokiarchaeota archaeon CR_4     | small GTP-binding protein [Candidatus Lokiarchaeota archaeon CR_4].            | GCA_001940655.1 |
| OQW99838.1 | AP-GTPase+COR*→                              | AP-GTPase+COR                       | 550  | BWK73_49720    | Gammaproteobacteria | Thiothrix lacustris                        | hypothetical protein BWK73_49720 [Thiothrix lacustris].                        | GCA_002083875.1 |
| OQX07299.1 | AP-GTPase*→                                  | AP-GTPase                           | 495  | BWK80_49630    | Deltaproteobacteria | Desulfobacteraceae bacterium IS3           | hypothetical protein BWK80_49630, partial [Desulfobacteraceae bacterium IS3].  | GCA_002083955.1 |
| OQX29968.1 | AP-GTPase+COR*→                              | AP-GTPase+COR                       | 659  | B0D92_00955    | Spirochaetes        | Spirochaeta sp. LUC14_002_19_P3            | hypothetical protein B0D92_00955, partial [Spirochaeta sp. LUC14_002_19_P3].   | GCA_002084135.1 |
| OQY29953.1 | AP-GTPase+COR+CASPASE*→                      | AP-GTPase+COR+CASPASE               | 1279 | B6244_01455    | FCB group           | Candidatus Cloacimonetes bacterium 4572_55 | hypothetical protein B6244_01455 [Candidatus Cloacimonetes bacterium 4572_55]. | GCA_002084765.1 |

| acc        | operon                                              | architecture                           | len  | gen.name       | taxend              | species                                              | define                                                                                   | gca             |
|------------|-----------------------------------------------------|----------------------------------------|------|----------------|---------------------|------------------------------------------------------|------------------------------------------------------------------------------------------|-----------------|
| OYW77642.1 | AP-GTPase+COR*→                                     | AP-GTPase+COR                          | 915  | B7Z37_03570    | Verrucomicrobia     | Verrucomicrobia bacterium 12-59-8                    | hypothetical protein B7Z37_03570, partial [Verrucomicrobia bacterium 12-59-8].           | GCA_002279765.1 |
| PID37771.1 | AP-GTPase+COR*→                                     | AP-GTPase+COR                          | 901  | CR966_00525    | Gammaproteobacteria | Pseudomonadales bacterium                            | hypothetical protein CR966_00525 [Pseudomonadales bacterium].                            | GCA_002746545.1 |
| PIE42009.1 | AP-GTPase+COR+DUF4404*→                             | AP-GTPase+COR+DUF4404                  | 686  | CSA47_02360    | Gammaproteobacteria | Gammaproteobacteria bacterium                        | hypothetical protein CSA47_02360 [Gammaproteobacteria bacterium].                        | GCA_002748595.1 |
| PKL67687.1 | BetaPropeller+AP-GTPase+PrimaseZnR+TIR*→            | BetaPropeller+AP-GTPase+PrimaseZnR+TIR | 1195 | CVV28_05310    | Euryarchaeota       | Methanobacteriales archaeon HGW-Methanobacteriales-1 | hypothetical protein CVV28_05310 [Methanobacteriales archaeon HGW-Methanobacteriales-1]. | GCA_002839705.1 |
| POZ51526.1 | AP-GTPase+COR+DUF4404*→                             | AP-GTPase+COR+DUF4404                  | 919  | AADEFJLK_02392 | Gammaproteobacteria | Methylovulum psychrotolerans                         | GTP-binding protein [Methylovulum psychrotolerans].                                      | GCA_002923755.1 |
| PPD43153.1 | AP-GTPase+COR+DUF4404*→                             | AP-GTPase+COR+DUF4404                  | 914  | CTY16_13990    | Gammaproteobacteria | Methylobacter sp.                                    | hypothetical protein CTY16_13990 [Methylobacter sp.].                                    | GCA_002929035.1 |
| PPD50180.1 | AP-GTPase+COR+DUF4404*→                             | AP-GTPase+COR+DUF4404                  | 927  | CTY13_02150    | Gammaproteobacteria | Methylobacter sp.                                    | hypothetical protein CTY13_02150 [Methylobacter sp.].                                    | GCA_002929095.1 |
| PPD50460.1 | PolB→ Cluster2355_2clades→ AP-GTPase+COR+DUF4404*→  | AP-GTPase+COR+DUF4404                  | 904  | CTY16_01515    | Gammaproteobacteria | Methylobacter sp.                                    | hypothetical protein CTY16_01515 [Methylobacter sp.].                                    | GCA_002929035.1 |
| QDT95532.1 | TIR+APATPase+TPR+TPR+TPR→?→ AP-GTPase+COR+DUF4404*→ | AP-GTPase+COR+DUF4404                  | 683  | V144x_09770    | Planctomycetes      | Gimesia aquarii                                      | Miro-like protein [Gimesia aquarii].                                                     | GCA_007748195.1 |
| RCJ23846.1 | VWA+AP-GTPase+COR+TIR+TIR*→                         | VWA+AP-GTPase+COR+TIR+TIR              | 1359 | A6770_28940    | Cyanobacteria       | Nostoc minutum NIES-26                               | hypothetical protein A6770_28940 [Nostoc minutum NIES-26].                               | GCA_003326215.1 |
| RHO76387.1 | AP-GTPase*→                                         | AP-GTPase                              | 197  | DW061_22950    | Firmicutes          | Ruminococcus sp. AF42-9BH                            | hypothetical protein DW061_22950, partial [Ruminococcus sp. AF42-9BH].                   | GCA_003477585.1 |
| RIK66911.1 | SIG+AP-GTPase+COR*→                                 | SIG+AP-GTPase+COR                      | 867  | DCC65_08160    | Planctomycetes      | Planctomycetes bacterium                             | hypothetical protein DCC65_08160 [Planctomycetes bacterium].                             | GCA_003576905.1 |
| RKZ52796.1 | AP-GTPase+COR*→                                     | AP-GTPase+COR                          | 469  | DRR00_06990    | Gammaproteobacteria | Gammaproteobacteria bacterium                        | hypothetical protein DRR00_06990 [Gammaproteobacteria bacterium].                        | GCA_003645185.1 |
| RLI66235.1 | AP-GTPase*→                                         | AP-GTPase                              | 176  | DRO88_02330    | Asgard group        | Candidatus Lokiarchaeota archaeon                    | GTP-binding protein [Candidatus Lokiarchaeota archaeon].                                 | GCA_003662865.1 |
| RLI69359.1 | AP-GTPase*→                                         | AP-GTPase                              | 199  | DRP02_10785    | Asgard group        | Candidatus Heimdallarchaeota archaeon                | hypothetical protein DRP02_10785 [Candidatus Heimdallarchaeota archaeon].                | GCA_003662935.1 |
| RTZ62858.1 | AP-GTPase+COR*→                                     | AP-GTPase+COR                          | 577  | DSZ29_07625    | Aquificae           | Aquificaceae bacterium                               | hypothetical protein DSZ29_07625 [Aquificaceae bacterium].                               | GCA_003972955.1 |

| acc        | operon                                       | architecture                | len  | gen.name            | taxend              | species                                    | define                                                                         | gca             |
|------------|----------------------------------------------|-----------------------------|------|---------------------|---------------------|--------------------------------------------|--------------------------------------------------------------------------------|-----------------|
| RYE19062.1 | AP-GTPase+COR*→                              | AP-GTPase+COR               | 577  | EOP45_13210         | Bacteroidetes       | Sphingobacteriaceae bacterium              | GTP-binding protein, partial [Sphingobacteriaceae bacterium].                  | GCA_004144285.1 |
| RZL32479.1 | SIG+AP-GTPase+COR*→                          | SIG+AP-GTPase+COR           | 392  | EOP00_33890         | Bacteroidetes       | Pedobacter sp.                             | GTP-binding protein, partial [Pedobacter sp.].                                 | GCA_004211475.1 |
| SEM19691.1 | SIG+AP-GTPase+COR*→                          | SIG+AP-GTPase+COR           | 929  | SAMN04489760_10698  | Deltaproteobacteria | Syntrophus gentianae                       | small GTP-binding protein domain-containing protein [Syntrophus gentianae].    | GCA_900109885.1 |
| SKA90036.1 | AP-GTPase*→                                  | AP-GTPase                   | 120  | SAMN02745166_01647  | Verrucomicrobia     | Prostheco bacter debontii                  | hypothetical protein SAMN02745166_01647 [Prostheco bacter debontii].           | GCA_900167535.1 |
| SNR48942.1 | BetaPropeller+AP-GTPase+TIR*→                | BetaPropeller+AP-GTPase+TIR | 1008 | SAMN06264365_102815 | Actinobacteria      | Actinoplanes regularis                     | small GTP-binding protein domain-containing protein [Actinoplanes regularis].  | GCA_900188005.1 |
| TAA74167.1 | AP-GTPase*→                                  | AP-GTPase                   | 415  | CDV28_13720         | Deltaproteobacteria | Candidatus Electronema sp. GS              | Ras of Complex, Roc, domain of DAPkinase [Candidatus Electronema sp. GS].      | GCA_004284765.1 |
| TAN66684.1 | AP-GTPase+COR+DUF4404*→                      | AP-GTPase+COR+DUF4404       | 912  | EPN17_13365         | Gammaproteobacteria | Methylobacter sp.                          | hypothetical protein EPN17_13365 [Methylobacter sp.].                          | GCA_004299305.1 |
| TET30065.1 | AP-GTPase*→                                  | AP-GTPase                   | 212  | E3J70_05515         | Asgard group        | Candidatus Heimdallarchaeota archaeon      | GTP-binding protein [Candidatus Heimdallarchaeota archaeon].                   | GCA_004376455.1 |
| TFF85226.1 | AP-GTPase*→                                  | AP-GTPase                   | 173  | EU518_01555         | Asgard group        | Candidatus Lokiarchaeota archaeon          | GTP-binding protein [Candidatus Lokiarchaeota archaeon].                       | GCA_004524075.1 |
| TFF94051.1 | AP-GTPase*→                                  | AP-GTPase                   | 179  | EU544_04990         | Asgard group        | Candidatus Lokiarchaeota archaeon          | GTP-binding protein [Candidatus Lokiarchaeota archaeon].                       | GCA_004524325.1 |
| TFG01113.1 | AP-GTPase*→                                  | AP-GTPase                   | 173  | EU542_07480         | Asgard group        | Candidatus Lokiarchaeota archaeon          | GTP-binding protein [Candidatus Lokiarchaeota archaeon].                       | GCA_004524355.1 |
| TFG18716.1 | AP-GTPase*→                                  | AP-GTPase                   | 217  | EU530_08380         | Asgard group        | Candidatus Lokiarchaeota archaeon          | GTP-binding protein [Candidatus Lokiarchaeota archaeon].                       | GCA_004524545.1 |
| TKG00166.1 | AP-GTPase+COR*→                              | AP-GTPase+COR               | 467  | FCV76_15430         | Gammaproteobacteria | Vibrio sp. F13                             | GTP-binding protein [Vibrio sp. F13].                                          | GCA_005146615.1 |
| TKJ20917.1 | AP-GTPase*→                                  | AP-GTPase                   | 192  | CEE42_14430         | Asgard group        | Candidatus Lokiarchaeota archaeon Loki_b31 | hypothetical protein CEE42_14430 [Candidatus Lokiarchaeota archaeon Loki_b31]. | GCA_005222975.1 |
| TLU87712.1 | SIG+ZetaToxin→ TIR+BetaPropeller+AP-GTPase*→ | TIR+BetaPropeller+AP-GTPase | 1149 | FDX21_02485         | Chlorobi            | Chlorobium sp.                             | TIR domain-containing protein [Chlorobium sp.].                                | GCA_005862225.1 |
| TOG86811.1 | AP-GTPase+COR*→                              | AP-GTPase+COR               | 675  | CGI91_22345         | Gammaproteobacteria | Vibrio parahaemolyticus                    | hypothetical protein CGI91_22345 [Vibrio parahaemolyticus].                    | GCA_006372615.1 |
| TPQ26187.1 | AP-GTPase+COR+TM+TM*→                        | AP-GTPase+COR+TM+TM         | 752  | C2U68_12455         | Gammaproteobacteria | Methylomonas koyamae                       | hypothetical protein C2U68_12455 [Methylomonas koyamae].                       | GCA_006483455.1 |
| TXT62600.1 | AP-GTPase*→                                  | AP-GTPase                   | 178  | BAJALOKI3v1_540018  | Asgard group        | Candidatus Lokiarchaeota archaeon          | GTP-binding protein Der [Candidatus Lokiarchaeota archaeon].                   | GCA_008080735.1 |

| acc        | operon                                        | architecture                                | len  | gen.name                     | taxend | species             | define                    | gca                                                                                         |   |
|------------|-----------------------------------------------|---------------------------------------------|------|------------------------------|--------|---------------------|---------------------------|---------------------------------------------------------------------------------------------|---|
| VFJ44888.1 | TIR+BetaPropeller+AP-GTPase*→                 | TIR+BetaPropeller+AP-GTPase                 | 766  | BECKFW1821A_GA0114235_100658 | 53     | gammaproteobacteria | Candidatus Kentron sp. FW | WD domain-containing protein, G-beta repeat-containing protein [Candidatus Kentron sp. FW]. | - |
| VFJ45524.1 | AP-GTPase+COR+TM+TM*→                         | AP-GTPase+COR+TM+TM                         | 839  | BECKFM1743C_GA0114222_100766 | 66     | gammaproteobacteria | Candidatus Kentron sp. FM | Ras of Complex, Roc, domain of DAPkinase [Candidatus Kentron sp. FM].                       | - |
| VFJ50707.1 | TIR+BetaPropeller+AP-GTPase*→                 | TIR+BetaPropeller+AP-GTPase                 | 1132 | BECKFW1821B_GA0114236_100740 | 40     | gammaproteobacteria | Candidatus Kentron sp. FW | WD40 repeat [Candidatus Kentron sp. FW].                                                    | - |
| VFJ53002.1 | AP-GTPase+COR+TM+TM*→                         | AP-GTPase+COR+TM+TM                         | 812  | BECKDK2373C_GA0170839_103824 | 24     | gammaproteobacteria | Candidatus Kentron sp. DK | Ras of Complex, Roc, domain of DAPkinase [Candidatus Kentron sp. DK].                       | - |
| VFJ54602.1 | AP-GTPase+COR+TM+TM*→                         | AP-GTPase+COR+TM+TM                         | 670  | BECKDK2373C_GA0170839_104041 | 41     | gammaproteobacteria | Candidatus Kentron sp. DK | Ras of Complex, Roc, domain of DAPkinase, partial [Candidatus Kentron sp. DK].              | - |
| VFJ56646.1 | AP-GTPase+COR+TM+TM*→                         | AP-GTPase+COR+TM+TM                         | 841  | BECKDK2373B_GA0170837_106041 | 41     | gammaproteobacteria | Candidatus Kentron sp. DK | Ras of Complex, Roc, domain of DAPkinase [Candidatus Kentron sp. DK].                       | - |
| VFJ57440.1 | AP-GTPase*→                                   | AP-GTPase                                   | 395  | BECKFW1821B_GA0114236_103041 | 41     | gammaproteobacteria | Candidatus Kentron sp. FW | Ras of Complex, Roc, domain of DAPkinase, partial [Candidatus Kentron sp. FW].              | - |
| VFJ59594.1 | AP-GTPase+COR+CR-ATPase8+CR-REase7+TM+TM+TM*→ | AP-GTPase+COR+CR-ATPase8+CR-REase7+TM+TM+TM | 1492 | BECKFW1821A_GA0114235_109218 | 18     | gammaproteobacteria | Candidatus Kentron sp. FW | GTPase SAR1 family protein [Candidatus Kentron sp. FW].                                     | - |
| VFJ60987.1 | AP-GTPase+COR+TM+TM*→                         | AP-GTPase+COR+TM+TM                         | 889  | BECKFM1743C_GA0114222_102852 | 52     | gammaproteobacteria | Candidatus Kentron sp. FM | Ras of Complex, Roc, domain of DAPkinase [Candidatus Kentron sp. FM].                       | - |
| VFJ61225.1 | AP-GTPase+COR+TM+TM*→                         | AP-GTPase+COR+TM+TM                         | 683  | BECKDK2373B_GA0170837_109045 | 45     | gammaproteobacteria | Candidatus Kentron sp. DK | Ras of Complex, Roc, domain of DAPkinase, partial [Candidatus Kentron sp. DK].              | - |
| VFJ62038.1 | AP-GTPase+COR+TM+TM*→                         | AP-GTPase+COR+TM+TM                         | 843  | BECKFW1821B_GA0114236_106042 | 42     | gammaproteobacteria | Candidatus Kentron sp. FW | GTPase SAR1 family protein [Candidatus Kentron sp. FW].                                     | - |
| VFJ65256.1 | AP-GTPase+COR+TM+TM*→                         | AP-GTPase+COR+TM+TM                         | 523  | BECKFW1821A_GA0114235_119061 | 61     | gammaproteobacteria | Candidatus Kentron sp. FW | hypothetical protein BECKFW1821A_GA0114235_11961, partial [Candidatus Kentron sp. FW].      | - |
| VFJ68931.1 | AP-GTPase+COR+TM+TM*→                         | AP-GTPase+COR+TM+TM                         | 948  | BECKFM1743C_GA0114222_105041 | 41     | gammaproteobacteria | Candidatus Kentron sp. FM | Ras of Complex, Roc, domain of DAPkinase [Candidatus Kentron sp. FM].                       | - |
| VFJ70290.1 | AP-GTPase+COR+TM+TM*→                         | AP-GTPase+COR+TM+TM                         | 787  | BECKFM1743C_GA0114222_105041 | 41     | gammaproteobacteria | Candidatus Kentron sp. FM | Ras of Complex, Roc, domain of DAPkinase [Candidatus Kentron sp. FM].                       | - |
| VFJ72898.1 | AP-GTPase+COR+NACHT*→                         | AP-GTPase+COR+NACHT                         | 1882 | BECKFW1821C_GA0114237_104077 | 77     | gammaproteobacteria | Candidatus Kentron sp. FW | Pentapeptide repeat-containing protein [Candidatus Kentron sp. FW].                         | - |
| VFJ73192.1 | AP-GTPase+COR+TM+TM*→                         | AP-GTPase+COR+TM+TM                         | 770  | BECKFW1821C_GA0114237_104077 | 77     | gammaproteobacteria | Candidatus Kentron sp. FW | GTPase SAR1 family protein, partial [Candidatus Kentron sp. FW].                            | - |
| VFJ76094.1 | AP-GTPase+COR+TM+TM*→                         | AP-GTPase+COR+TM+TM                         | 834  | BECKFW1821C_GA0114237_109067 | 67     | gammaproteobacteria | Candidatus Kentron sp. FW | GTPase SAR1 family protein [Candidatus Kentron sp. FW].                                     | - |
| VFJ95876.1 | AP-GTPase+COR+TM+TM*→                         | AP-GTPase+COR+TM+TM                         | 753  | BECKH772A_GA0070896_1009310  | 10     | gammaproteobacteria | Candidatus Kentron sp. H  | Ras of Complex, Roc, domain of DAPkinase, partial [Candidatus Kentron sp. H].               | - |



| acc        | operon                                                                                                                                     | architecture        | len | gen.name                      | taxend | species                     | define                                                                                     | gca |
|------------|--------------------------------------------------------------------------------------------------------------------------------------------|---------------------|-----|-------------------------------|--------|-----------------------------|--------------------------------------------------------------------------------------------|-----|
| VFK01091.1 | AP-GTPase+COR*→                                                                                                                            | AP-GTPase+COR       | 275 | BECKLFY1418B_GA0070995_1277   | Gamma  | Candidatus Kentron sp. LFY  | Ras of Complex, Roc, domain of DAPkinase, partial [Candidatus Kentron sp. LFY].            | -   |
| VFK03671.1 | AP-GTPase*→                                                                                                                                | AP-GTPase           | 118 | BECKLFY1418A_GA0070994_1311   | Gamma  | Candidatus Kentron sp. LFY  | Ras of Complex, Roc, domain of DAPkinase, partial [Candidatus Kentron sp. LFY].            | -   |
| VFK03687.1 | AP-GTPase*→                                                                                                                                | AP-GTPase           | 118 | BECKLFY1418A_GA0070994_1312   | Gamma  | Candidatus Kentron sp. LFY  | Ras of Complex, Roc, domain of DAPkinase, partial [Candidatus Kentron sp. LFY].            | -   |
| VFK04035.1 | AP-GTPase+COR+TM+TM*→                                                                                                                      | AP-GTPase+COR+TM+TM | 677 | BECKH772B_GA0070898_104021    | Gamma  | Candidatus Kentron sp. H    | Ras of Complex, Roc, domain of DAPkinase, partial [Candidatus Kentron sp. H].              | -   |
| VFK07263.1 | AP-GTPase+COR+TM+TM*→                                                                                                                      | AP-GTPase+COR+TM+TM | 674 | BECKH772C_GA0070978_104041    | Gamma  | Candidatus Kentron sp. H    | Ras of Complex, Roc, domain of DAPkinase, partial [Candidatus Kentron sp. H].              | -   |
| VFK11049.1 | AP-GTPase+COR+TM+TM*→                                                                                                                      | AP-GTPase+COR+TM+TM | 865 | BECKLPF1236A_GA0070988_100386 | Gamma  | Candidatus Kentron sp. LPFa | Ras of Complex, Roc, domain of DAPkinase [Candidatus Kentron sp. LPFa].                    | -   |
| VFK19789.1 | AP-GTPase+COR+TM+TM*→                                                                                                                      | AP-GTPase+COR+TM+TM | 853 | BECKLPF1236B_GA0070989_11862  | Gamma  | Candidatus Kentron sp. LPFa | Ras of Complex, Roc, domain of DAPkinase [Candidatus Kentron sp. LPFa].                    | -   |
| VFK19871.1 | AP-GTPase*→                                                                                                                                | AP-GTPase           | 161 | BECKLFY1418C_GA0070996_10628  | Gamma  | Candidatus Kentron sp. LFY  | small GTP-binding protein domain-containing protein, partial [Candidatus Kentron sp. LFY]. | -   |
| VFK26330.1 | AP-GTPase*→                                                                                                                                | AP-GTPase           | 116 | BECKLFY1418C_GA0070996_1333   | Gamma  | Candidatus Kentron sp. LFY  | Ras of Complex, Roc, domain of DAPkinase, partial [Candidatus Kentron sp. LFY].            | -   |
| VFK27413.1 | AP-GTPase+COR+TM+TM*→ CR-ATPase8+CR-REase7→ CR-ATPase8+CR-REase7→ CR-ATPase8+CR-REase7→ CR-ATPase8+CR-REase7→?→  <-?<-ParA-Soj-PloopNTPase | AP-GTPase+COR+TM+TM | 893 | BECKMB1821I_GA0114274_100304  | Gamma  | Candidatus Kentron sp. MB   | Ras of Complex, Roc, domain of DAPkinase [Candidatus Kentron sp. MB].                      | -   |
| VFK29755.1 | AP-GTPase+COR+TM+TM*→ AP-GTPase+COR+TM+TM→                                                                                                 | AP-GTPase+COR+TM+TM | 840 | BECKMB1821G_GA0114241_10587   | Gamma  | Candidatus Kentron sp. MB   | Ras of Complex, Roc, domain of DAPkinase [Candidatus Kentron sp. MB].                      | -   |
| VFK30623.1 | AP-GTPase+COR+TM+TM*→ CR-ATPase8+CR-REase7→ CR-ATPase8+CR-REase7→ CR-ATPase8+CR-REase7→ CR-ATPase8+CR-REase7→?→  <-?<-ParA-Soj-PloopNTPase | AP-GTPase+COR+TM+TM | 718 | BECKMB1821G_GA0114241_10661   | Gamma  | Candidatus Kentron sp. MB   | hypothetical protein BECKMB1821G_GA0114241_10681, partial [Candidatus Kentron sp. MB].     | -   |
| VFK30872.1 | AP-GTPase+COR+TM+TM*→                                                                                                                      | AP-GTPase+COR+TM+TM | 680 | BECKMB1821G_GA0114241_10721   | Gamma  | Candidatus Kentron sp. MB   | hypothetical protein BECKMB1821G_GA0114241_10721, partial [Candidatus Kentron sp. MB].     | -   |
| VFK31841.1 | AP-GTPase*→                                                                                                                                | AP-GTPase           | 476 | BECKMB1821I_GA0114274_10276   | Gamma  | Candidatus Kentron sp. MB   | Ras of Complex, Roc, domain of DAPkinase [Candidatus Kentron sp. MB].                      | -   |
| VFK32767.1 | AP-GTPase+COR+TM+TM*→                                                                                                                      | AP-GTPase+COR+TM+TM | 875 | BECKMB1821I_GA0114274_10366   | Gamma  | Candidatus Kentron sp. MB   | Ras of Complex, Roc, domain of DAPkinase [Candidatus Kentron sp. MB].                      | -   |
| VFK33354.1 | AP-GTPase+COR+TM+TM*→                                                                                                                      | AP-GTPase+COR+TM+TM | 844 | BECKMB1821I_GA0114274_10446   | Gamma  | Candidatus Kentron sp. MB   | Ras of Complex, Roc, domain of DAPkinase [Candidatus Kentron sp. MB].                      | -   |

| acc        | operon                                     | architecture                             | len  | gen.name                       | taxend              | species                    | define                                                                                                       | gca |
|------------|--------------------------------------------|------------------------------------------|------|--------------------------------|---------------------|----------------------------|--------------------------------------------------------------------------------------------------------------|-----|
| VFK39913.1 | AP-GTPase+COR+TM+TM*→                      | AP-GTPase+COR+TM+TM                      | 790  | BECKTC1821D_GA0114238_100746   | Gammaproteobacteria | Candidatus Kentron sp. TC  | Ras of Complex, Roc, domain of DAPkinase [Candidatus Kentron sp. TC].                                        | -   |
| VFK39956.1 | RADICAL-SAM→ AP-GTPase+COR*→               | AP-GTPase+COR                            | 694  | BECKSD772F_GA0070984_105016    | Gammaproteobacteria | Candidatus Kentron sp. SD  | GTPase SAR1 family protein [Candidatus Kentron sp. SD].                                                      | -   |
| VFK40684.1 | AP-GTPase+COR+TM+TM*→                      | AP-GTPase+COR+TM+TM                      | 854  | BECKSD772F_GA0070984_10665     | Gammaproteobacteria | Candidatus Kentron sp. SD  | Ras of Complex, Roc, domain of DAPkinase [Candidatus Kentron sp. SD].                                        | -   |
| VFK42825.1 | AP-GTPase+COR+TM+TM*→                      | AP-GTPase+COR+TM+TM                      | 834  | BECKTC1821E_GA0114239_102104   | Gammaproteobacteria | Candidatus Kentron sp. TC  | Ras of Complex, Roc, domain of DAPkinase [Candidatus Kentron sp. TC].                                        | -   |
| VFK53024.1 | AP-GTPase+COR+TM+TM*→                      | AP-GTPase+COR+TM+TM                      | 852  | BECK-TUN1418D_GA0071000_101730 | Gammaproteobacteria | Candidatus Kentron sp. TUN | Ras of Complex, Roc, domain of DAPkinase [Candidatus Kentron sp. TUN].                                       | -   |
| VFK54740.1 | AP-GTPase+COR+TM+TM*→                      | AP-GTPase+COR+TM+TM                      | 851  | BECK-TUN1418F_GA0071002_10532  | Gammaproteobacteria | Candidatus Kentron sp. TUN | GTPase SAR1 family protein [Candidatus Kentron sp. TUN].                                                     | -   |
| VFK54787.1 | CR-ATPase8+CR-REase7+AP-GTPase+COR+TM+TM*→ | CR-ATPase8+CR-REase7+AP-GTPase+COR+TM+TM | 1117 | BECK-TUN1418F_GA0071002_105513 | Gammaproteobacteria | Candidatus Kentron sp. TUN | Ras of Complex, Roc, domain of DAPkinase [Candidatus Kentron sp. TUN].                                       | -   |
| VFK55234.1 | AP-GTPase+COR+TM+TM*→                      | AP-GTPase+COR+TM+TM                      | 870  | BECK-TUN1418D_GA0071000_102911 | Gammaproteobacteria | Candidatus Kentron sp. TUN | GTPase SAR1 family protein [Candidatus Kentron sp. TUN].                                                     | -   |
| VFK55404.1 | AP-GTPase+COR+TM+TM*→ AP-GTPase+COR+TM+TM→ | AP-GTPase+COR+TM+TM                      | 834  | BECK-TUN1418E_GA0071001_10293  | Gammaproteobacteria | Candidatus Kentron sp. TUN | Ras of Complex, Roc, domain of DAPkinase [Candidatus Kentron sp. TUN].                                       | -   |
| VFK57219.1 | AP-GTPase+COR+TM+TM*→                      | AP-GTPase+COR+TM+TM                      | 799  | BECKTC1821F_GA0114240_101506   | Gammaproteobacteria | Candidatus Kentron sp. TC  | Ras of Complex, Roc, domain of DAPkinase [Candidatus Kentron sp. TC].                                        | -   |
| VFK57233.1 | AP-GTPase+COR*→                            | AP-GTPase+COR                            | 1361 | BECK-TUN1418F_GA0071002_11091  | Gammaproteobacteria | Candidatus Kentron sp. TUN | Uncharacterized conserved protein, contains ParB-like and HNH nuclease domains [Candidatus Kentron sp. TUN]. | -   |
| VFK58480.1 | AP-GTPase+COR*→                            | AP-GTPase+COR                            | 1384 | BECK-TUN1418D_GA0071000_10836  | Gammaproteobacteria | Candidatus Kentron sp. TUN | Ras of Complex, Roc, domain of DAPkinase [Candidatus Kentron sp. TUN].                                       | -   |
| VFK60758.1 | CR-ATPase8+CR-REase7+AP-GTPase*→           | CR-ATPase8+CR-REase7+AP-GTPase           | 877  | BECK-UNK1418G_GA0071005_101311 | Gammaproteobacteria | Candidatus Kentron sp. UNK | PD-(D/E)XK nuclease superfamily protein [Candidatus Kentron sp. UNK].                                        | -   |
| VFK62743.1 | AP-GTPase*→                                | AP-GTPase                                | 337  | BECK-TUN1418D_GA0071000_11856  | Gammaproteobacteria | Candidatus Kentron sp. TUN | Ras of Complex, Roc, domain of DAPkinase, partial [Candidatus Kentron sp. TUN].                              | -   |
| VFK65329.1 | AP-GTPase+COR*→                            | AP-GTPase+COR                            | 1361 | BECK-TUN1418E_GA0071001_11051  | Gammaproteobacteria | Candidatus Kentron sp. TUN | Uncharacterized conserved protein, contains ParB-like and HNH nuclease domains [Candidatus Kentron sp. TUN]. | -   |
| VFK67825.1 | BetaPropeller+AP-GTPase*→                  | BetaPropeller+AP-GTPase                  | 526  | BECK-UNK1418G_GA0071005_11685  | Gammaproteobacteria | Candidatus Kentron sp. UNK | WD domain-containing protein, G-beta repeat-containing protein [Candidatus Kentron sp. UNK].                 | -   |
| VFK67855.1 | AP-GTPase+COR+TM+TM*→                      | AP-GTPase+COR+TM+TM                      | 598  | BECK-UNK1418G_GA0071005_11705  | Gammaproteobacteria | Candidatus Kentron sp. UNK | Ras of Complex, Roc, domain of DAPkinase [Candidatus Kentron sp. UNK].                                       | -   |

| acc            | operon                                                               | architecture                   | len  | gen.name                   | taxend              | species                                  | define                                                                          | gca             |
|----------------|----------------------------------------------------------------------|--------------------------------|------|----------------------------|---------------------|------------------------------------------|---------------------------------------------------------------------------------|-----------------|
| VFK77412.1     | AP-GTPase+COR+TM+TM*→                                                | AP-GTPase+COR+TM+TM            | 734  | BECKMB1821H_GA0114242_1136 | Gammaproteobacteria | Candidatus Kentron sp. MB                | Ras of Complex, Roc, domain of DAPkinase, partial [Candidatus Kentron sp. MB].  | -               |
| VFK80164.1     | AP-GTPase+COR+TM+TM*→                                                | AP-GTPase+COR+TM+TM            | 872  | BECKSD772D_GA0070982_10897 | Gammaproteobacteria | Candidatus Kentron sp. SD                | Ras of Complex, Roc, domain of DAPkinase [Candidatus Kentron sp. SD].           | -               |
| VFM99483.1     | AP-GTPase+COR+TM+TM*→                                                | AP-GTPase+COR+TM+TM            | 725  | BECKG1743F_GA0114225_10402 | Gammaproteobacteria | Candidatus Kentron sp. G                 | GTPase SAR1 family protein [Candidatus Kentron sp. G].                          | GCA_900696175.1 |
| VFM99853.1     | AP-GTPase+COR+TM+TM*→                                                | AP-GTPase+COR+TM+TM            | 744  | BECKG1743F_GA0114225_10433 | Gammaproteobacteria | Candidatus Kentron sp. G                 | small GTP-binding protein domain-containing protein [Candidatus Kentron sp. G]. | GCA_900696175.1 |
| WP_002684219.1 | AP-GTPase+COR+DUF4404*→                                              | AP-GTPase+COR+DUF4404          | 883  | -                          | Gammaproteobacteria | Beggiatoa alba                           | Miro-like protein [Beggiatoa alba].                                             | GCF_000245015.1 |
| WP_009138084.1 | AP-GTPase+COR*→                                                      | AP-GTPase+COR                  | 843  | -                          | Bacteroidetes       | Odoribacter laneus                       | hypothetical protein [Odoribacter laneus].                                      | GCF_902374615.1 |
| WP_012499245.1 | AP-GTPase*→                                                          | AP-GTPase                      | 394  | -                          | Chlorobi            | Chloroherpeton thalassium                | Miro domain-containing protein [Chloroherpeton thalassium].                     | GCF_000020525.1 |
| WP_020559412.1 | GTPase-AIG→ ABC-ATPase→ SIG+TM+TM+TM+TM→ AP-GTPase+COR*→             | AP-GTPase+COR                  | 833  | -                          | Gammaproteobacteria | Thiofilum flexile                        | hypothetical protein [Thiofilum flexile].                                       | GCF_000380185.1 |
| WP_027001878.1 | AP-GTPase+COR*→                                                      | AP-GTPase+COR                  | 754  | -                          | Bacteroidetes       | Hugenholtzia roseola                     | hypothetical protein [Hugenholtzia roseola].                                    | GCF_000422585.1 |
| WP_040612090.1 | AP-GTPase+COR*→                                                      | AP-GTPase+COR                  | 849  | -                          | Bacteroidetes       | Odoribacter laneus                       | hypothetical protein [Odoribacter laneus].                                      | -               |
| WP_050025079.1 | VWA+AP-GTPase+COR+EAD1+Trypsin*→                                     | VWA+AP-GTPase+COR+EAD1+Trypsin | 1458 | -                          | Verrucomicrobia     | Verrucomicrobium sp. BvORR034            | GTP-binding protein [Verrucomicrobium sp. BvORR034].                            | -               |
| WP_052368940.1 | TIR+BetaPropeller+AP-GTPase*→                                        | TIR+BetaPropeller+AP-GTPase    | 1107 | -                          | Euryarchaeota       | Candidatus Methanoperedens nitroreducens | TIR domain-containing protein [Candidatus Methanoperedens nitroreducens].       | GCF_000685155.1 |
| WP_071819957.1 | TIR+BetaPropeller+AP-GTPase*→  <-?<-?<-?<-?<-?<-RuvB-AAA+RuvB-HTH    | TIR+BetaPropeller+AP-GTPase    | 1449 | -                          | Cyanobacteria       | Acaryochloris marina                     | TIR domain-containing protein [Acaryochloris marina].                           | GCF_000018105.1 |
| WP_077027722.1 | <-Phytase-like  ?→?→ tRNA→  <-?<-?<-?  TIR+BetaPropeller+AP-GTPase*→ | TIR+BetaPropeller+AP-GTPase    | 1401 | -                          | Planctomycetes      | Fuerstia marisgermanicae                 | TIR domain-containing protein [Fuerstia marisgermanicae].                       | GCF_001983935.1 |
| WP_081716878.1 | AP-GTPase+COR+TIR*→                                                  | AP-GTPase+COR+TIR              | 722  | -                          | Cyanobacteria       | Leptolyngbya sp. Heron Island J          | TIR domain-containing protein [Leptolyngbya sp. Heron Island J].                | -               |
| WP_081891667.1 | AP-GTPase+COR+TIR*→                                                  | AP-GTPase+COR+TIR              | 825  | -                          | Verrucomicrobia     | Verrucomicrobium sp. BvORR106            | TIR domain-containing protein [Verrucomicrobium sp. BvORR106].                  | -               |
| WP_083888126.1 | AP-GTPase*→                                                          | AP-GTPase                      | 116  | -                          | Cyanobacteria       | Oscillatoria nigro-viridis               | hypothetical protein [Oscillatoria nigro-viridis].                              | -               |
| WP_093066994.1 | AP-GTPase+COR*→                                                      | AP-GTPase+COR                  | 857  | -                          | Gammaproteobacteria | Thiothrix caldifontis                    | hypothetical protein [Thiothrix caldifontis].                                   | GCF_900107695.1 |
| WP_093068668.1 | AP-GTPase+COR*→                                                      | AP-GTPase+COR                  | 960  | -                          | Gammaproteobacteria | Thiothrix caldifontis                    | hypothetical protein [Thiothrix caldifontis].                                   | GCF_900107695.1 |
| WP_093882803.1 | SIG+AP-GTPase+COR*→                                                  | SIG+AP-GTPase+COR              | 880  | -                          | Deltaproteobacteria | Syntrophus gentianae                     | hypothetical protein [Syntrophus gentianae].                                    | GCF_900109885.1 |
| WP_103921835.1 | HTH→ AP-GTPase+COR*→                                                 | AP-GTPase+COR                  | 576  | -                          | Gammaproteobacteria | Thiotrichales bacterium HS_08            | hypothetical protein [Thiotrichales bacterium HS_08].                           | -               |
| WP_129026230.1 | AP-GTPase+COR*→                                                      | AP-GTPase+COR                  | 431  | -                          | Bacteroidetes       | Flavobacterium sp. YO12                  | hypothetical protein [Flavobacterium sp. YO12].                                 | GCF_004119495.1 |

| acc            | operon                                                                                 | architecture                                      | len  | gen.name | taxend                | species                                   | define                                                           | gca             |
|----------------|----------------------------------------------------------------------------------------|---------------------------------------------------|------|----------|-----------------------|-------------------------------------------|------------------------------------------------------------------|-----------------|
| WP_137245090.1 | TM+AP-GTPase*→                                                                         | TM+AP-GTPase                                      | 93   | -        | Actinobacteria        | Herbidospira galbida                      | hypothetical protein [Herbidospira galbida].                     | GCF_005233835.1 |
| WP_139373135.1 | AP-GTPase*→                                                                            | AP-GTPase                                         | 134  | -        | Verrucomicrobia       | Prostheco bacter debontii                 | hypothetical protein [Prostheco bacter debontii].                | GCF_900167535.1 |
| WP_140311973.1 | AP-GTPase+COR*→                                                                        | AP-GTPase+COR                                     | 697  | -        | Gammaproteobacteria   | Vibrio parahaemolyticus                   | GTP-binding protein, partial [Vibrio parahaemolyticus].          | GCF_006372615.1 |
| WP_144982131.1 | TIR+APATPase+TPR+TPR+TPR→?→ AP-GTPase+COR+DUF4404*→                                    | AP-GTPase+COR+DUF4404                             | 692  | -        | Planctomycetes        | Gimesia aquarii                           | hypothetical protein [Gimesia aquarii].                          | GCF_007748195.1 |
| WP_145384506.1 | AP-GTPase+COR*→                                                                        | AP-GTPase+COR                                     | 680  | -        | Planctomycetes        | Stieleria neptunia                        | 50S ribosome-binding GTPase [Stieleria neptunia].                | GCF_007754155.1 |
| WP_146054573.1 | AP-GTPase+COR+DUF4404*→                                                                | AP-GTPase+COR+DUF4404                             | 731  | -        | Gammaproteobacteria   | Methylovulum psychrotolerans              | hypothetical protein [Methylovulum psychrotolerans].             | GCF_002923755.1 |
| WP_147662502.1 | AP-GTPase*→                                                                            | AP-GTPase                                         | 204  | -        | Asgard group          | Candidatus Prometheoarchaeum syntrophicum | GTP-binding protein [Candidatus Prometheoarchaeum syntrophicum]. | GCF_008000775.1 |
| WP_157679487.1 | AP-GTPase+COR+DUF4404*→                                                                | AP-GTPase+COR+DUF4404                             | 911  | -        | Gammaproteobacteria   | Methylovulum psychrotolerans              | hypothetical protein [Methylovulum psychrotolerans].             | GCF_002209385.1 |
| WP_157817021.1 | <-EAD10+VMAP-M1+VMAP-C  ?→  <-PSE  BetaPropeller+AP-GTPase+Calcineurin+CASPASE+NACHT*→ | BetaPropeller+AP-GTPase+Calcineurin+CASPASE+NACHT | 1731 | -        | Cyanobacteria         | Nostoc flagelliforme                      | NACHT domain-containing protein [Nostoc flagelliforme].          | GCF_002813575.1 |
| WP_160572809.1 | AP-GTPase+COR+DUF4404*→                                                                | AP-GTPase+COR+DUF4404                             | 720  | -        | unclassified Bacteria | bacterium D16-29                          | GTP-binding protein [bacterium D16-29].                          | -               |
| WP_162669385.1 | AP-GTPase+COR+DUF4404*→                                                                | AP-GTPase+COR+DUF4404                             | 615  | -        | Planctomycetes        | Gemmata massiliana                        | hypothetical protein [Gemmata massiliana].                       | GCF_901538265.1 |
| WP_170962814.1 | AP-GTPase+COR*→                                                                        | AP-GTPase+COR                                     | 453  | -        | Gammaproteobacteria   | Vibrio sp. F13                            | GTP-binding protein [Vibrio sp. F13].                            | GCF_005146615.1 |
| WP_173978580.1 | TIR+BetaPropeller+AP-GTPase*→                                                          | TIR+BetaPropeller+AP-GTPase                       | 1154 | -        | Alphaproteobacteria   | Magnetospirillum sp. UT-4                 | TIR domain-containing protein [Magnetospirillum sp. UT-4].       | GCF_902729435.1 |
| WP_175453917.1 | AP-GTPase+COR*→                                                                        | AP-GTPase+COR                                     | 757  | -        | Firmicutes            | Sarcina sp. DSM 11001                     | GTP-binding protein, partial [Sarcina sp. DSM 11001].            | GCF_900101015.1 |
| WP_177428378.1 | AP-GTPase+COR+CR-ATPase9*→                                                             | AP-GTPase+COR+CR-ATPase9                          | 880  | -        | Gammaproteobacteria   | Thiotrichales bacterium HS_08             | hypothetical protein [Thiotrichales bacterium HS_08].            | -               |
| WP_179276996.1 | BetaPropeller+AP-GTPase+TIR*→                                                          | BetaPropeller+AP-GTPase+TIR                       | 996  | -        | Actinobacteria        | Actinoplanes regularis                    | TIR domain-containing protein [Actinoplanes regularis].          | GCF_016862355.1 |
| WP_180983884.1 | AP-GTPase+COR*→                                                                        | AP-GTPase+COR                                     | 676  | -        | Gammaproteobacteria   | Vibrio agarivorans                        | 50S ribosome-binding GTPase, partial [Vibrio agarivorans].       | GCF_002894965.1 |
| WP_186289598.1 | AP-GTPase+COR+TM+TM*→                                                                  | AP-GTPase+COR+TM+TM                               | 905  | -        | Gammaproteobacteria   | Methylomonas koyamae                      | hypothetical protein [Methylomonas koyamae].                     | GCF_006483455.1 |
