# Supplementary material for: Bacterial death and TRADD-N domains help define novel apoptosis and immunity mechanisms shared by prokaryotes and metazoans
Source: eLife journal article supplement (doi:10.7554/elife.70394), 2021-06-01
Supplement: fig4-data1 [file elife-70394-fig4-data1-v2.pdf]

**Bacterial Death and TRADD-N domains help define novel apoptosis and immunity mechanisms shared by prokaryotes and metazoans**

**Figure 4-Source data 1**

Gurmeet Kaur†, Lakshminarayan M. Iyer†, A. Maxwell Burroughs, L. Aravind\*

Computational Biology Branch, National Center for Biotechnology Information, National Library of Medicine, National Institutes of Health, Bethesda, MD 20894, USA

†These authors contributed equally to the manuscript

## **Index.**

1. Non-redundant counts of TRADD-N domains in eukaryotic lineages
2. Domain architectures of the Eukaryotic TRADD-N domains

Non-redundant counts of TRADD-N domains in eukaryotic lineages

| GCA | taxonomy                     | count           |     |
|-----|------------------------------|-----------------|-----|
|     | Amphimedon queenslandica     | GCF_000090795.1 | 307 |
|     | Branchiostoma floridae       | GCF_000003815.1 | 113 |
|     | Stylophora pistillata        | GCF_002571385.1 | 86  |
|     | Acropora digitifera          | GCF_000222465.1 | 83  |
|     | Branchiostoma belcheri       | GCF_001625305.1 | 77  |
|     | Branchiostoma floridae       | GCA_000003815.1 | 65  |
|     | Orbicella faveolata          | GCF_002042975.1 | 61  |
|     | Stylophora pistillata        | GCA_002571385.1 | 52  |
|     | Crassostrea gigas            | GCF_000297895.1 | 35  |
|     | Crassostrea virginica        | GCF_002022765.2 | 32  |
|     | Lingula anatina              | GCF_001039355.2 | 31  |
|     | Saccoglossus kowalevskii     | GCF_000003605.2 | 24  |
|     | Exaiptasia pallida           | GCA_001417965.1 | 17  |
|     | Pocillopora damicornis       | GCA_003704095.1 | 17  |
|     | Acanthaster planci           | GCF_001949145.1 | 15  |
|     | Exaiptasia pallida           | GCF_001417965.1 | 12  |
|     | Apostichopus japonicus       | GCA_002754855.1 | 9   |
|     | Mizuhopecten yessoensis      | GCF_002113885.1 | 9   |
|     | Capitella teleta             | GCA_000328365.1 | 8   |
|     | Carassius auratus            | GCF_003368295.1 | 8   |
|     | Oncorhynchus kisutch         | GCF_002021735.1 | 8   |
|     | Oncorhynchus mykiss          | GCF_002163495.1 | 8   |
|     | Salmo salar                  | GCF_000233375.1 | 8   |
|     | Sinocyclocheilus anshuiensis | GCF_001515605.1 | 8   |
|     | Sinocyclocheilus rhinoceros  | GCF_001515625.1 | 8   |
|     | Nematostella vectensis       | GCF_000209225.1 | 8   |
|     | Limulus polyphemus           | GCF_000517525.1 | 7   |
|     | Xenopus laevis               | GCF_001663975.1 | 7   |
|     | Cyprinus carpio              | GCA_001270105.1 | 7   |
|     | Salvelinus alpinus           | GCF_002910315.2 | 7   |
|     | Sinocyclocheilus grahami     | GCF_001515645.1 | 7   |
|     | Cyprinus carpio              | GCF_000951615.1 | 6   |
|     | Heterocephalus glaber        | GCA_000230445.1 | 5   |
|     | Microtus ochrogaster         | GCF_000317375.1 | 5   |

| GCA | taxonomy                            | count           |   |
|-----|-------------------------------------|-----------------|---|
|     | Odocoileus virginianus texanus      | GCF_002102435.1 | 5 |
|     | Phascolarctos cinereus              | GCF_002099425.1 | 5 |
|     | Rhincodon typus                     | GCF_001642345.1 | 5 |
|     | Oncorhynchus tshawytscha            | GCF_002872995.1 | 5 |
|     | Paramormyrops kingsleyae            | GCF_002872115.1 | 5 |
|     | Lottia gigantea                     | GCF_000327385.1 | 5 |
|     | Pogona vitticeps                    | GCF_900067755.1 | 4 |
|     | Theropithecus gelada                | GCF_003255815.1 | 4 |
|     | Ailuropoda melanoleuca              | GCF_000004335.2 | 4 |
|     | Alligator mississippiensis          | GCA_000281125.4 | 4 |
|     | Alligator sinensis                  | GCF_000455745.1 | 4 |
|     | Anolis carolinensis                 | GCF_000090745.1 | 4 |
|     | Apteryx australis mantelli          | GCF_001039765.1 | 4 |
|     | Balaenoptera acutorostrata scammoni | GCF_000493695.1 | 4 |
|     | Bos taurus                          | GCF_002263795.1 | 4 |
|     | Bubalus bubalis                     | GCF_003121395.1 | 4 |
|     | Calidris pugnax                     | GCF_001431845.1 | 4 |
|     | Callithrix jacchus                  | GCF_000004665.1 | 4 |
|     | Camelus ferus                       | GCF_000311805.1 | 4 |
|     | Canis lupus familiaris              | GCF_000002285.3 | 4 |
|     | Cariama cristata                    | GCA_000690535.1 | 4 |
|     | Carlito syrichta                    | GCF_000164805.1 | 4 |
|     | Castor canadensis                   | GCF_001984765.1 | 4 |
|     | Cavia porcellus                     | GCF_000151735.1 | 4 |
|     | Cebus capucinus imitator            | GCF_001604975.1 | 4 |
|     | Cercocebus atys                     | GCF_000955945.1 | 4 |
|     | Chaetura pelagica                   | GCF_000747805.1 | 4 |
|     | Chinchilla lanigera                 | GCF_000276665.1 | 4 |
|     | Chrysemys picta bellii              | GCF_000241765.3 | 4 |
|     | Chrysochloris asiatica              | GCF_000296735.1 | 4 |
|     | Dasypus novemcinctus                | GCF_000208655.1 | 4 |
|     | Desmodus rotundus                   | GCF_002940915.1 | 4 |
|     | Dipodomys ordii                     | GCF_000151885.1 | 4 |
|     | Echinops telfairi                   | GCF_000313985.2 | 4 |

| GCA                         | taxonomy         | count |
|-----------------------------|------------------|-------|
| Elephantulus edwardii       | GCF_000299155.1  | 4     |
| Erinaceus europaeus         | GCF_000296755.1  | 4     |
| Gekko japonicus             | GCF_001447785.1  | 4     |
| Heterocephalus glaber       | GCF_000247695.1  | 4     |
| Hipposideros armiger        | GCF_001890085.1  | 4     |
| Homo sapiens                | GCF_000001405.39 | 4     |
| Ictidomys tridecemlineatus  | GCF_000236235.1  | 4     |
| Jaculus jaculus             | GCF_000280705.1  | 4     |
| Latimeria chalumnae         | GCF_000225785.1  | 4     |
| Leptonychotes weddellii     | GCF_000349705.1  | 4     |
| Lipotes vexillifer          | GCF_000442215.1  | 4     |
| Loxodonta africana          | GCF_000001905.1  | 4     |
| Manis javanica              | GCF_001685135.1  | 4     |
| Marmota marmota marmota     | GCF_001458135.1  | 4     |
| Meriones unguiculatus       | GCF_002204375.1  | 4     |
| Mesocricetus auratus        | GCF_000349665.1  | 4     |
| Miniopterus natalensis      | GCF_001595765.1  | 4     |
| Monodelphis domestica       | GCF_000002295.2  | 4     |
| Mus caroli                  | GCF_900094665.1  | 4     |
| Mus musculus                | GCF_000001635.26 | 4     |
| Mustela putorius furo       | GCF_000215625.1  | 4     |
| Myotis brandtii             | GCF_000412655.1  | 4     |
| Myotis davidii              | GCF_000327345.1  | 4     |
| Myotis lucifugus            | GCF_000147115.1  | 4     |
| Nannospalax galili          | GCF_000622305.1  | 4     |
| Nanorana parkeri            | GCF_000935625.1  | 4     |
| Neotoma lepida              | GCA_001675575.1  | 4     |
| Nipponia nippon             | GCF_000708225.1  | 4     |
| Ochotona princeps           | GCF_000292845.1  | 4     |
| Octodon degus               | GCF_000260255.1  | 4     |
| Odobenus rosmarus divergens | GCF_000321225.1  | 4     |
| Orcinus orca                | GCF_000331955.2  | 4     |
| Orycteropus afer afer       | GCF_000298275.1  | 4     |
| Otolemur garnettii          | GCF_000181295.1  | 4     |

| GCA                            | taxonomy        | count |
|--------------------------------|-----------------|-------|
| Panthera pardus                | GCF_001857705.1 | 4     |
| Panthera tigris altaica        | GCF_000464555.1 | 4     |
| Pelodiscus sinensis            | GCF_000230535.1 | 4     |
| Peromyscus maniculatus bairdii | GCF_000500345.1 | 4     |
| Pongo abelii                   | GCF_002880775.1 | 4     |
| Protobothrops mucrosquamatus   | GCF_001527695.2 | 4     |
| Pseudopodoces humilis          | GCF_000331425.1 | 4     |
| Pteropus alecto                | GCF_000325575.1 | 4     |
| Python bivittatus              | GCF_000186305.1 | 4     |
| Rattus norvegicus              | GCF_000002265.2 | 4     |
| Rousettus aegyptiacus          | GCF_001466805.2 | 4     |
| Sorex araneus                  | GCF_000181275.1 | 4     |
| Sus scrofa                     | GCF_000003025.6 | 4     |
| Thamnophis sirtalis            | GCF_001077635.1 | 4     |
| Trichechus manatus latirostris | GCF_000243295.1 | 4     |
| Tupaia chinensis               | GCF_000334495.1 | 4     |
| Ursus maritimus                | GCF_000687225.1 | 4     |
| Xenopus tropicalis             | GCF_000004195.3 | 4     |
| Acanthochromis polyacanthus    | GCF_002109545.1 | 4     |
| Amphiprion ocellaris           | GCF_002776465.1 | 4     |
| Austrofundulus limnaeus        | GCF_001266775.1 | 4     |
| Boleophthalmus pectinirostris  | GCF_000788275.1 | 4     |
| Clupea harengus                | GCF_000966335.1 | 4     |
| Cynoglossus semilaevis         | GCF_000523025.1 | 4     |
| Cyprinodon variegatus          | GCF_000732505.1 | 4     |
| Danio rerio                    | GCF_000002035.6 | 4     |
| Esox lucius                    | GCF_004634155.1 | 4     |
| Fundulus heteroclitus          | GCF_000826765.1 | 4     |
| Gambusia affinis               | GCA_003097735.1 | 4     |
| Hippocampus comes              | GCF_001891065.1 | 4     |
| Ictalurus punctatus            | GCF_001660625.1 | 4     |
| Kryptolebias marmoratus        | GCF_001649575.1 | 4     |
| Lates calcarifer               | GCF_001640805.1 | 4     |
| Lepisosteus oculatus           | GCF_000242695.1 | 4     |

| GCA                        | taxonomy        | count |
|----------------------------|-----------------|-------|
| Maylandia zebra            | GCF_000238955.4 | 4     |
| Monopterus albus           | GCF_001952655.1 | 4     |
| Neolamprologus brichardi   | GCF_000239395.1 | 4     |
| Nothobranchius furzeri     | GCF_001465895.1 | 4     |
| Notothenia coriiceps       | GCF_000735185.1 | 4     |
| Oncorhynchus mykiss        | GCA_900005705.1 | 4     |
| Oreochromis niloticus      | GCF_001858045.2 | 4     |
| Oryzias latipes            | GCF_002234675.1 | 4     |
| Oryzias melastigma         | GCF_002922805.1 | 4     |
| Paralichthys olivaceus     | GCF_001970005.1 | 4     |
| Poecilia formosa           | GCF_000485575.1 | 4     |
| Poecilia reticulata        | GCF_000633615.1 | 4     |
| Pundamilia nyererei        | GCF_000239375.1 | 4     |
| Pygocentrus nattereri      | GCF_001682695.1 | 4     |
| Scophthalmus maximus       | GCA_003186165.1 | 4     |
| Seriola dumerili           | GCF_002260705.1 | 4     |
| Seriola lalandi dorsalis   | GCF_002814215.1 | 4     |
| Stegastes partitus         | GCF_000690725.1 | 4     |
| Xiphophorus maculatus      | GCF_002775205.1 | 4     |
| Pomacea canaliculata       | GCF_003073045.1 | 4     |
| Octopus bimaculoides       | GCF_001194135.1 | 4     |
| Aplysia californica        | GCF_000002075.1 | 4     |
| Cervus elaphus hippelaphus | GCA_002197005.1 | 3     |
| Hirundo rustica rustica    | GCA_003692655.1 | 3     |
| Chelonia mydas             | GCA_000344595.1 | 3     |
| Alligator mississippiensis | GCF_000281125.3 | 3     |
| Amazona aestiva            | GCA_001420675.1 | 3     |
| Aotus nancymaae            | GCF_000952055.2 | 3     |
| Aptenodytes forsteri       | GCF_000699145.1 | 3     |
| Bos indicus                | GCF_000247795.1 | 3     |
| Bos mutus                  | GCA_000298355.1 | 3     |
| Bos mutus                  | GCF_000298355.1 | 3     |
| Callipepla squamata        | GCA_002218305.1 | 3     |
| Callorhynchus milii        | GCF_000165045.1 | 3     |

| GCA                                         | taxonomy        | count |
|---------------------------------------------|-----------------|-------|
| Callorhinus ursinus                         | GCF_003265705.1 | 3     |
| Camelus ferus                               | GCA_000311805.2 | 3     |
| Capra hircus                                | GCF_001704415.1 | 3     |
| Cariama cristata                            | GCF_000690535.1 | 3     |
| Ceratotherium simum simum                   | GCF_000283155.1 | 3     |
| Charadrius vociferus                        | GCA_000708025.2 | 3     |
| Charadrius vociferus                        | GCF_000708025.1 | 3     |
| Columba livia                               | GCF_000337935.1 | 3     |
| Condylura cristata                          | GCF_000260355.1 | 3     |
| Coturnix japonica                           | GCF_001577835.1 | 3     |
| Crocodylus porosus                          | GCF_001723895.1 | 3     |
| Cuculus canorus                             | GCF_000709325.1 | 3     |
| Delphinapterus leucas                       | GCF_002288925.2 | 3     |
| Egretta garzetta                            | GCF_000687185.1 | 3     |
| Enhydra lutris kenyoni                      | GCF_002288905.1 | 3     |
| Eptesicus fuscus                            | GCF_000308155.1 | 3     |
| Equus asinus                                | GCF_001305755.1 | 3     |
| Equus caballus                              | GCF_002863925.1 | 3     |
| Felis catus                                 | GCF_000181335.3 | 3     |
| Fukomys damarensis                          | GCF_000743615.1 | 3     |
| Galeopterus variegatus                      | GCF_000696425.1 | 3     |
| Gallus gallus                               | GCF_000002315.5 | 3     |
| Macaca fascicularis                         | GCA_000230815.1 | 3     |
| Meleagris gallopavo                         | GCF_000146605.2 | 3     |
| Neomonachus schauinslandi                   | GCF_002201575.1 | 3     |
| Neophocaena asiaeorientalis asiaeorientalis | GCF_003031525.1 | 3     |
| Notechis scutatus                           | GCF_900518725.1 | 3     |
| Numida meleagris                            | GCF_002078875.1 | 3     |
| Oryctolagus cuniculus                       | GCF_000003625.3 | 3     |
| Pan paniscus                                | GCF_000258655.2 | 3     |
| Papio anubis                                | GCF_000264685.3 | 3     |
| Phaethon lepturus                           | GCF_000687285.1 | 3     |
| Ptilocolobus tephrosceles                   | GCF_002776525.2 | 3     |
| Pongo abelii                                | GCA_002880775.3 | 3     |



| GCA                          | taxonomy        | count |
|------------------------------|-----------------|-------|
| Propithecus coquereli        | GCF_000956105.1 | 3     |
| Pseudonaja textilis          | GCF_900518735.1 | 3     |
| Pteropus vampyrus            | GCF_000151845.1 | 3     |
| Sarcophilus harrisii         | GCF_000189315.1 | 3     |
| Struthio camelus australis   | GCA_000698965.1 | 3     |
| Struthio camelus australis   | GCF_000698965.1 | 3     |
| Sturnus vulgaris             | GCF_001447265.1 | 3     |
| Xenopus laevis               | GCA_001663975.1 | 3     |
| Acanthisitta chloris         | GCF_000695815.1 | 3     |
| Antrostomus carolinensis     | GCF_000700745.1 | 3     |
| Bambusicola thoracicus       | GCA_002909625.1 | 3     |
| Bison bison bison            | GCF_000754665.1 | 3     |
| Colius striatus              | GCF_000690715.1 | 3     |
| Colobus angolensis palliatus | GCF_000951035.1 | 3     |
| Corvus brachyrhynchos        | GCA_000691975.1 | 3     |
| Corvus brachyrhynchos        | GCF_000691975.1 | 3     |
| Cyanistes caeruleus          | GCF_002901205.1 | 3     |
| Ficedula albicollis          | GCF_000247815.1 | 3     |
| Lepidothrix coronata         | GCF_001604755.1 | 3     |
| Parus major                  | GCF_001522545.3 | 3     |
| Picoides pubescens           | GCF_000699005.1 | 3     |
| Tinamus guttatus             | GCF_000705375.1 | 3     |
| Anabas testudineus           | GCF_900324465.1 | 3     |
| Astyanax mexicanus           | GCF_000372685.2 | 3     |
| Electrophorus electricus     | GCF_003665695.1 | 3     |
| Haplochromis burtoni         | GCF_000239415.1 | 3     |
| Labrus bergylta              | GCF_900080235.1 | 3     |
| Larimichthys crocea          | GCF_000972845.2 | 3     |
| Mastacembelus armatus        | GCF_900324485.1 | 3     |
| Pangasianodon hypophthalmus  | GCF_003671635.1 | 3     |
| Poecilia latipinna           | GCF_001443285.1 | 3     |
| Scleropages formosus         | GCA_001005745.2 | 3     |
| Tetraodon nigroviridis       | GCA_000180735.1 | 3     |
| Biomphalaria glabrata        | GCF_000457365.1 | 3     |

| GCA                       | taxonomy        | count |
|---------------------------|-----------------|-------|
| Macrostomum lignano       | GCA_002269645.1 | 2     |
| Centruroides sculpturatus | GCF_000671375.1 | 2     |
| Parasteatoda tepidariorum | GCF_000365465.2 | 2     |
| Ciona intestinalis        | GCF_000224145.3 | 2     |
| Acinonyx jubatus          | GCF_003709585.1 | 2     |
| Aptenodytes forsteri      | GCA_000699145.1 | 2     |
| Chaetura pelagica         | GCA_000747805.1 | 2     |
| Colinus virginianus       | GCA_000599465.2 | 2     |
| Cricetulus griseus        | GCA_000448345.1 | 2     |
| Cuculus canorus           | GCA_000709325.1 | 2     |
| Egretta garzetta          | GCA_000687185.1 | 2     |
| Falco peregrinus          | GCF_000337955.1 | 2     |
| Gorilla gorilla gorilla   | GCF_008122165.1 | 2     |
| Haliaeetus leucocephalus  | GCF_000737465.1 | 2     |
| Macaca mulatta            | GCA_000230795.1 | 2     |
| Macaca mulatta            | GCF_003339765.1 | 2     |
| Mandrillus leucophaeus    | GCF_000951045.1 | 2     |
| Melopsittacus undulatus   | GCF_000238935.1 | 2     |
| Nothoprocta perdicaria    | GCF_003342845.1 | 2     |
| Pan troglodytes           | GCA_002880755.3 | 2     |
| Physeter catodon          | GCF_002837175.2 | 2     |
| Puma concolor             | GCF_003327715.1 | 2     |
| Rhinopithecus roxellana   | GCF_007565055.1 | 2     |
| Tupaia chinensis          | GCA_000334495.1 | 2     |
| Vicugna pacos             | GCF_000164845.2 | 2     |
| Vulpes vulpes             | GCF_003160815.1 | 2     |
| Zonotrichia albicollis    | GCF_000385455.1 | 2     |
| Acanthisitta chloris      | GCA_000695815.1 | 2     |
| Apteryx rowi              | GCF_003343035.1 | 2     |
| Phalacrocorax carbo       | GCF_000708925.1 | 2     |
| Rana catesbeiana          | GCA_002284835.2 | 2     |
| Xenopus tropicalis        | GCA_000004195.3 | 2     |
| Anas platyrhynchos        | GCA_000355885.1 | 2     |
| Anas platyrhynchos        | GCF_003850225.1 | 2     |

| GCA                             | taxonomy        | count |
|---------------------------------|-----------------|-------|
| Anser cygnoides domesticus      | GCF_000971095.1 | 2     |
| Antrostomus carolinensis        | GCA_000700745.1 | 2     |
| Apaloderma vittatum             | GCA_000703405.1 | 2     |
| Apaloderma vittatum             | GCF_000703405.1 | 2     |
| Aquila chrysaetos canadensis    | GCF_000766835.1 | 2     |
| Balearica regulorum gibbericeps | GCA_000709895.1 | 2     |
| Balearica regulorum gibbericeps | GCF_000709895.1 | 2     |
| Buceros rhinoceros silvestris   | GCA_000710305.1 | 2     |
| Buceros rhinoceros silvestris   | GCF_000710305.1 | 2     |
| Camelus bactrianus              | GCF_000767855.1 | 2     |
| Cathartes aura                  | GCA_000699945.1 | 2     |
| Chlamydotis macqueenii          | GCA_000695195.1 | 2     |
| Chlorocebus sabaeus             | GCF_000409795.2 | 2     |
| Colius striatus                 | GCA_000690715.1 | 2     |
| Cricetulus griseus              | GCF_000223135.1 | 2     |
| Equus przewalskii               | GCF_000696695.1 | 2     |
| Eurypyga helias                 | GCA_000690775.1 | 2     |
| Fulmarus glacialis              | GCA_000690835.1 | 2     |
| Gavia stellata                  | GCA_000690875.1 | 2     |
| Gavialis gangeticus             | GCF_001723915.1 | 2     |
| Haliaeetus albicilla            | GCF_000691405.1 | 2     |
| Leptosomus discolor             | GCA_000691785.1 | 2     |
| Lonchura striata domestica      | GCA_002197715.1 | 2     |
| Macaca fascicularis             | GCF_000364345.1 | 2     |
| Merops nubicus                  | GCA_000691845.1 | 2     |
| Merops nubicus                  | GCF_000691845.1 | 2     |
| Mesitornis unicolor             | GCA_000695765.1 | 2     |
| Microcebus murinus              | GCF_000165445.2 | 2     |
| Mus pahari                      | GCF_900095145.1 | 2     |
| Myotis davidii                  | GCA_000327345.1 | 2     |
| Nestor notabilis                | GCF_000696875.1 | 2     |
| Nipponia nippon                 | GCA_000708225.1 | 2     |
| Nomascus leucogenys             | GCF_006542625.1 | 2     |
| Opisthocomus hoazin             | GCF_000692075.1 | 2     |

| GCA | taxonomy                        | count           |   |
|-----|---------------------------------|-----------------|---|
|     | Pelecanus crispus               | GCA_000687375.1 | 2 |
|     | Phaethon lepturus               | GCA_000687285.1 | 2 |
|     | Phalacrocorax carbo             | GCA_000708925.1 | 2 |
|     | Phoenicopterus ruber ruber      | GCA_000687265.1 | 2 |
|     | Podiceps cristatus              | GCA_000699545.1 | 2 |
|     | Pterocles gutturalis            | GCA_000699245.1 | 2 |
|     | Pterocles gutturalis            | GCF_000699245.1 | 2 |
|     | Pygoscelis adeliae              | GCF_000699105.1 | 2 |
|     | Rattus norvegicus               | GCF_000001895.5 | 2 |
|     | Rhinopithecus bieti             | GCF_001698545.1 | 2 |
|     | Saimiri boliviensis boliviensis | GCF_000235385.1 | 2 |
|     | Tauraco erythrolophus           | GCA_000709365.1 | 2 |
|     | Tauraco erythrolophus           | GCF_000709365.1 | 2 |
|     | Tursiops truncatus              | GCF_001922835.1 | 2 |
|     | Tyto alba                       | GCA_000687205.1 | 2 |
|     | Astatotilapia calliptera        | GCF_900246225.1 | 2 |
|     | Poecilia mexicana               | GCF_001443325.1 | 2 |
|     | Scleropages formosus            | GCF_900964775.1 | 2 |
|     | Takifugu rubripes               | GCF_901000725.2 | 2 |
|     | Drosophila serrata              | GCF_002093755.1 | 2 |
|     | Mizuhopecten yessoensis         | GCA_002113885.2 | 2 |
|     | Pomacea canaliculata            | GCA_003073045.1 | 2 |
|     | Clonorchis sinensis             | GCA_003604175.1 | 1 |
|     | Echinococcus granulosus         | GCF_000524195.1 | 1 |
|     | Echinococcus multilocularis     | GCA_000469725.3 | 1 |
|     | Hymenolepis microstoma          | GCA_000469805.2 | 1 |
|     | Opisthorchis viverrini          | GCF_000715545.1 | 1 |
|     | Schistosoma mansoni             | GCF_000237925.1 | 1 |
|     | Stegodyphus mimosarum           | GCA_000611955.2 | 1 |
|     | Nephila clavipes                | GCA_002102615.1 | 1 |
|     | Euroglyphus maynei              | GCA_002135145.1 | 1 |
|     | Galendromus occidentalis        | GCF_000255335.1 | 1 |
|     | Priapulus caudatus              | GCF_000485595.1 | 1 |
|     | Sarcoptes scabiei               | GCA_000828355.1 | 1 |

| GCA                          | taxonomy        | count |
|------------------------------|-----------------|-------|
| Tetranychus urticae          | GCF_000239435.1 | 1     |
| Varroa destructor            | GCF_002443255.1 | 1     |
| Varroa jacobsoni             | GCF_002532875.1 | 1     |
| Helobdella robusta           | GCF_000326865.1 | 1     |
| Canis lupus dingo            | GCF_003254725.1 | 1     |
| Chelonia mydas               | GCF_000344595.1 | 1     |
| Columba livia                | GCA_000337935.2 | 1     |
| Lonchura striata domestica   | GCF_005870125.1 | 1     |
| Mus musculus                 | GCA_000002165.1 | 1     |
| Cricetulus griseus           | GCA_003668045.1 | 1     |
| Ailuropoda melanoleuca       | GCA_000004335.1 | 1     |
| Falco cherrug                | GCF_000337975.1 | 1     |
| Fukomys damarensis           | GCA_000743615.1 | 1     |
| Limosa lapponica baueri      | GCA_002844005.1 | 1     |
| Macaca nemestrina            | GCF_000956065.1 | 1     |
| Myotis brandtii              | GCA_000412655.1 | 1     |
| Pan troglodytes              | GCF_002880755.1 | 1     |
| Patagioenas fasciata monilis | GCA_002029285.1 | 1     |
| Pteropus alecto              | GCA_000325575.1 | 1     |
| Vicugna pacos                | GCF_000164845.1 | 1     |
| Ophiophagus hannah           | GCA_000516915.1 | 1     |
| Gulo gulo                    | GCA_900006375.2 | 1     |
| Athene cunicularia           | GCF_003259725.1 | 1     |
| Calypte anna                 | GCA_000699085.1 | 1     |
| Chlamydotis macqueenii       | GCF_000695195.1 | 1     |
| Corvus cornix cornix         | GCF_000738735.2 | 1     |
| Cricetulus griseus           | GCA_000223135.1 | 1     |
| Dromaius novaehollandiae     | GCF_003342905.1 | 1     |
| Erythrura gouldiae           | GCA_003676055.1 | 1     |
| Eurypyga helias              | GCF_000690775.1 | 1     |
| Fulmarus glacialis           | GCF_000690835.1 | 1     |
| Gavia stellata               | GCF_000690875.1 | 1     |
| Geospiza fortis              | GCF_000277835.1 | 1     |
| Haliaeetus albicilla         | GCA_000691405.1 | 1     |

| GCA                           | taxonomy        | count |
|-------------------------------|-----------------|-------|
| Leptosomus discolor           | GCF_000691785.1 | 1     |
| Manacus vitellinus            | GCA_000692015.2 | 1     |
| Manacus vitellinus            | GCF_001715985.3 | 1     |
| Mesitornis unicolor           | GCF_000695765.1 | 1     |
| Nestor notabilis              | GCA_000696875.1 | 1     |
| Opisthocomus hoazin           | GCA_000692075.1 | 1     |
| Pelecanus crispus             | GCF_000687375.1 | 1     |
| Picoides pubescens            | GCA_000699005.1 | 1     |
| Pygoscelis adeliae            | GCA_000699105.1 | 1     |
| Serinus canaria               | GCF_007115625.1 | 1     |
| Terrapene mexicana triunguis  | GCF_002925995.2 | 1     |
| Tinamus guttatus              | GCA_000705375.2 | 1     |
| Tyto alba                     | GCF_000687205.1 | 1     |
| Urocitellus parryii           | GCF_003426925.1 | 1     |
| Ursus arctos horribilis       | GCF_003584765.1 | 1     |
| Anabarilius grahami           | GCA_003731715.1 | 1     |
| Tachysurus fulvidraco         | GCF_003724035.1 | 1     |
| Nematostella vectensis        | GCA_000209225.1 | 1     |
| Daphnia magna                 | GCA_001632505.1 | 1     |
| Eurytemora affinis            | GCF_000591075.1 | 1     |
| Hyalella azteca               | GCF_000764305.1 | 1     |
| Strongylocentrotus purpuratus | GCF_000002235.5 | 1     |
| Acromyrmex echinatio          | GCF_000204515.1 | 1     |
| Acyrtosiphon pisum            | GCF_005508785.1 | 1     |
| Aedes aegypti                 | GCA_000004015.3 | 1     |
| Aedes aegypti                 | GCF_002204515.2 | 1     |
| Aedes albopictus              | GCA_001444175.2 | 1     |
| Amyeloides transitella        | GCF_001186105.1 | 1     |
| Anopheles darlingi            | GCA_000211455.3 | 1     |
| Anopheles gambiae str. PEST   | GCF_000005575.2 | 1     |
| Anopheles sinensis            | GCA_000441895.2 | 1     |
| Anoplophora glabripennis      | GCF_000390285.2 | 1     |
| Apis cerana                   | GCF_001442555.1 | 1     |
| Apis cerana cerana            | GCA_002290385.1 | 1     |

| GCA                         | taxonomy        | count |
|-----------------------------|-----------------|-------|
| Apis mellifera              | GCF_003254395.2 | 1     |
| Athalia rosae               | GCF_000344095.2 | 1     |
| Atta cephalotes             | GCF_000143395.1 | 1     |
| Atta colombica              | GCA_001594045.1 | 1     |
| Atta colombica              | GCF_001594045.1 | 1     |
| Bactrocera latifrons        | GCF_001853355.1 | 1     |
| Bactrocera oleae            | GCF_001188975.1 | 1     |
| Bemisia tabaci              | GCF_001854935.1 | 1     |
| Bicyclus anynana            | GCF_900239965.1 | 1     |
| Blattella germanica         | GCA_003018175.1 | 1     |
| Bombus impatiens            | GCF_000188095.3 | 1     |
| Bombus terrestris           | GCF_000214255.1 | 1     |
| Bombyx mori                 | GCF_000151625.1 | 1     |
| Camponotus floridanus       | GCA_000147175.1 | 1     |
| Camponotus floridanus       | GCF_003227725.1 | 1     |
| Cephus cinctus              | GCF_000341935.1 | 1     |
| Ceratina calcarata          | GCF_001652005.1 | 1     |
| Ceratitis capitata          | GCF_000347755.3 | 1     |
| Ceratosolen solmsi marchali | GCF_000503995.1 | 1     |
| Cimex lectularius           | GCF_000648675.2 | 1     |
| Clunio marinus              | GCA_900005825.1 | 1     |
| Copidosoma floridanum       | GCF_000648655.2 | 1     |
| Cryptotermes secundus       | GCF_002891405.2 | 1     |
| Culex quinquefasciatus      | GCF_000209185.1 | 1     |
| Cyphomyrmex costatus        | GCA_001594065.1 | 1     |
| Cyphomyrmex costatus        | GCF_001594065.1 | 1     |
| Danaus plexippus plexippus  | GCA_000235995.2 | 1     |
| Dendroctonus ponderosae     | GCF_000355655.1 | 1     |
| Diachasma alloeum           | GCF_001412515.2 | 1     |
| Diaphorina citri            | GCF_000475195.1 | 1     |
| Dinoponera quadriceps       | GCF_001313825.1 | 1     |
| Diuraphis noxia             | GCF_001186385.1 | 1     |
| Drosophila ananassae        | GCF_000005115.1 | 1     |
| Drosophila arizonae         | GCF_001654025.1 | 1     |

| GCA                                    | taxonomy        | count |
|----------------------------------------|-----------------|-------|
| Drosophila biarmipes                   | GCF_000233415.1 | 1     |
| Drosophila bipectinata                 | GCF_000236285.1 | 1     |
| Drosophila busckii                     | GCA_001277935.1 | 1     |
| Drosophila busckii                     | GCF_001277935.1 | 1     |
| Drosophila elegans                     | GCF_000224195.1 | 1     |
| Drosophila eugracilis                  | GCF_000236325.1 | 1     |
| Drosophila ficusphila                  | GCF_000220665.1 | 1     |
| Drosophila grimshawi                   | GCF_000005155.2 | 1     |
| Drosophila kikkawai                    | GCF_000224215.1 | 1     |
| Drosophila miranda                     | GCF_000269505.1 | 1     |
| Drosophila mojavensis                  | GCF_000005175.2 | 1     |
| Drosophila obscura                     | GCF_002217835.1 | 1     |
| Drosophila pseudoobscura pseudoobscura | GCF_000001765.3 | 1     |
| Drosophila rhopaloa                    | GCF_000236305.1 | 1     |
| Drosophila sechellia                   | GCF_000005215.3 | 1     |
| Drosophila suzukii                     | GCF_000472105.1 | 1     |
| Drosophila takahashii                  | GCF_000224235.1 | 1     |
| Drosophila virilis                     | GCF_000005245.1 | 1     |
| Drosophila willistoni                  | GCA_000005925.1 | 1     |
| Drosophila willistoni                  | GCF_000005925.1 | 1     |
| Drosophila yakuba                      | GCF_000005975.2 | 1     |
| Dufourea novaeangliae                  | GCA_001272555.1 | 1     |
| Dufourea novaeangliae                  | GCF_001272555.1 | 1     |
| Eufriesea mexicana                     | GCA_001483705.1 | 1     |
| Eufriesea mexicana                     | GCF_001483705.1 | 1     |
| Folsomia candida                       | GCA_002217175.1 | 1     |
| Folsomia candida                       | GCF_002217175.1 | 1     |
| Fopius arisanus                        | GCF_000806365.1 | 1     |
| Habropoda laboriosa                    | GCF_001263275.1 | 1     |
| Halyomorpha halys                      | GCF_000696795.2 | 1     |
| Harpegnathos saltator                  | GCA_000147195.1 | 1     |
| Harpegnathos saltator                  | GCF_003227715.1 | 1     |
| Helicoverpa armigera                   | GCA_002156985.1 | 1     |
| Helicoverpa armigera                   | GCF_002156985.1 | 1     |



| GCA                               | taxonomy        | count |
|-----------------------------------|-----------------|-------|
|                                   | GCA_002382865.1 | 1     |
| <i>Heliothis virescens</i>        | GCA_002382865.1 | 1     |
| <i>Leptinotarsa decemlineata</i>  | GCF_000500325.1 | 1     |
| <i>Linepithema humile</i>         | GCF_000217595.1 | 1     |
| <i>Lucilia cuprina</i>            | GCA_001187945.1 | 1     |
| <i>Lucilia cuprina</i>            | GCF_000699065.1 | 1     |
| <i>Megachile rotundata</i>        | GCF_000220905.1 | 1     |
| <i>Melanaphis sacchari</i>        | GCF_002803265.2 | 1     |
| <i>Melipona quadrifasciata</i>    | GCA_001276565.1 | 1     |
| <i>Microplitis demolitor</i>      | GCF_000572035.2 | 1     |
| <i>Monomorium pharaonis</i>       | GCF_003260585.2 | 1     |
| <i>Musca domestica</i>            | GCF_000371365.1 | 1     |
| <i>Myzus persicae</i>             | GCF_001856785.1 | 1     |
| <i>Nasonia vitripennis</i>        | GCF_000002325.3 | 1     |
| <i>Neodiprion lecontei</i>        | GCF_001263575.1 | 1     |
| <i>Nicrophorus vespilloides</i>   | GCF_001412225.1 | 1     |
| <i>Nilaparvata lugens</i>         | GCF_000757685.1 | 1     |
| <i>Onthophagus taurus</i>         | GCF_000648695.1 | 1     |
| <i>Operophtera brumata</i>        | GCA_001266575.1 | 1     |
| <i>Orussus abietinus</i>          | GCF_000612105.2 | 1     |
| <i>Oryctes borbonicus</i>         | GCA_001443705.1 | 1     |
| <i>Papilio machaon</i>            | GCA_001298355.1 | 1     |
| <i>Papilio machaon</i>            | GCF_001298355.1 | 1     |
| <i>Papilio polytes</i>            | GCF_000836215.1 | 1     |
| <i>Papilio xuthus</i>             | GCA_001298345.1 | 1     |
| <i>Papilio xuthus</i>             | GCF_000836235.1 | 1     |
| <i>Pediculus humanus corporis</i> | GCF_000006295.1 | 1     |
| <i>Pieris rapae</i>               | GCF_001856805.1 | 1     |
| <i>Plutella xylostella</i>        | GCF_000330985.1 | 1     |
| <i>Pogonomyrmex barbatus</i>      | GCF_000187915.1 | 1     |
| <i>Polistes canadensis</i>        | GCF_001313835.1 | 1     |
| <i>Polistes dominula</i>          | GCF_001465965.1 | 1     |
| <i>Pseudomyrmex gracilis</i>      | GCF_002006095.1 | 1     |
| <i>Rhagoletis zephyria</i>        | GCF_001687245.1 | 1     |
| <i>Sipha flava</i>                | GCF_003268045.1 | 1     |

| GCA                          | taxonomy        | count |
|------------------------------|-----------------|-------|
| Spodoptera litura            | GCF_002706865.1 | 1     |
| Stomoxys calcitrans          | GCF_001015335.1 | 1     |
| Temnothorax curvispinosus    | GCF_003070985.1 | 1     |
| Trachymyrmex cornetzi        | GCF_001594075.1 | 1     |
| Trachymyrmex septentrionalis | GCA_001594115.1 | 1     |
| Trachymyrmex septentrionalis | GCF_001594115.1 | 1     |
| Trachymyrmex zeteki          | GCA_001594055.1 | 1     |
| Trachymyrmex zeteki          | GCF_001594055.1 | 1     |
| Tribolium castaneum          | GCF_000002335.3 | 1     |
| Trichogramma pretiosum       | GCF_000599845.2 | 1     |
| Trichomalopsis sarcophagae   | GCA_002249905.1 | 1     |
| Vollenhovia emeryi           | GCF_000949405.1 | 1     |
| Wasmannia auropunctata       | GCF_000956235.1 | 1     |
| Zeugodacus cucurbitae        | GCF_000806345.1 | 1     |
| Zootermopsis nevadensis      | GCF_000696155.1 | 1     |
| Acromyrmex echinator         | GCA_000204515.1 | 1     |
| Apis florea                  | GCF_000184785.2 | 1     |
| Habropoda laboriosa          | GCA_001263275.1 | 1     |
| Ooceraea biroi               | GCA_000611835.1 | 1     |
| Trachymyrmex cornetzi        | GCA_001594075.1 | 1     |
| Octopus bimaculoides         | GCA_001194135.1 | 1     |
| Toxocara canis               | GCA_000803305.1 | 1     |
| Trichinella britovi          | GCA_001447585.1 | 1     |
| Trichinella murrelli         | GCA_001447425.1 | 1     |
| Trichinella nativa           | GCA_001447565.1 | 1     |
| Trichinella nelsoni          | GCA_001447455.1 | 1     |
| Trichinella papuae           | GCA_001447755.1 | 1     |
| Trichinella patagoniensis    | GCA_001447655.1 | 1     |
| Trichinella pseudospiralis   | GCA_001447445.1 | 1     |
| Trichinella pseudospiralis   | GCA_001447675.1 | 1     |
| Trichinella pseudospiralis   | GCA_001447575.1 | 1     |
| Trichinella pseudospiralis   | GCA_001447725.1 | 1     |
| Trichinella sp. T6           | GCA_001447435.1 | 1     |
| Trichinella sp. T8           | GCA_001447745.1 | 1     |

| GCA                      | taxonomy        | count |
|--------------------------|-----------------|-------|
| Trichinella sp. T9       | GCA_001447505.1 | 1     |
| Trichinella spiralis     | GCA_001447595.1 | 1     |
| Trichinella spiralis     | GCF_000181795.1 | 1     |
| Trichinella zimbabwensis | GCA_001447665.1 | 1     |
| Trichuris suis           | GCA_000701005.1 | 1     |
| Trichuris suis           | GCA_000701025.1 | 1     |
| Trichoplax adhaerens     | GCA_000150275.1 | 1     |
| Trichoplax adhaerens     | GCF_000150275.1 | 1     |

Domain architectures of the Eukaryotic TRADD-N domains

| acc            | architecture                                                            | len  | gen.name     | taxend  | species                  | define                                                                                       | gca             | clade        |
|----------------|-------------------------------------------------------------------------|------|--------------|---------|--------------------------|----------------------------------------------------------------------------------------------|-----------------|--------------|
| XP_023930852.1 | ABC2_membrane_3+TM+TM+TRADDN-DEDD2+Coiled-coil                          | 1079 | LOC106158803 | metazoa | Lingula anatina          | ATP-binding cassette sub-family A member 17-like [Lingula anatina]                           | GCF_001039355.2 | TRADDN-DEDD2 |
| XP_019860785.1 | Ankyrin+Death+CARD+DED+TRADDN-NCOA6                                     | 523  | LOC109589107 | metazoa | Amphimedon queenslandica | PREDICTED: uncharacterized protein LOC109589107 [Amphimedon queenslandica]                   | GCF_000090795.1 | TRADDN-NCOA6 |
| XP_013383107.1 | Ankyrin+LRRs+APGTPase+COR+TBP-like+TRADDN-DEDD2+P-loop-NTPase           | 2305 | LOC106153652 | metazoa | Lingula anatina          | leucine-rich repeat serine/threonine-protein kinase 1 [Lingula anatina]                      | GCF_001039355.2 | TRADDN-DEDD2 |
| XP_019859900.1 | Ankyrin+TRADDN-NCOA6+Ankyrin                                            | 309  | LOC109580158 | metazoa | Amphimedon queenslandica | PREDICTED: E3 ubiquitin-protein ligase MIB1-like [Amphimedon queenslandica]                  | GCF_000090795.1 | TRADDN-NCOA6 |
| XP_019861957.1 | Ankyrin+TRADDN-NCOA6+Ankyrin                                            | 973  | LOC109590491 | metazoa | Amphimedon queenslandica | PREDICTED: ankyrin repeat and KH domain-containing protein 1-like [Amphimedon queenslandica] | GCF_000090795.1 | TRADDN-NCOA6 |
| XP_019855546.1 | APGTPase+COR+DED+TRADDN-NCOA6+CASPASE                                   | 1170 | LOC105313777 | metazoa | Amphimedon queenslandica | PREDICTED: uncharacterized protein LOC105313777 [Amphimedon queenslandica]                   | GCF_000090795.1 | TRADDN-NCOA6 |
| XP_019863337.1 | CARD+CARD+DED+TRADDN-NCOA6                                              | 470  | LOC109592291 | metazoa | Amphimedon queenslandica | PREDICTED: uncharacterized protein LOC109592291, partial [Amphimedon queenslandica]          | GCF_000090795.1 | TRADDN-NCOA6 |
| XP_019850626.1 | CARD+CARD+DED+TRADDN-NCOA6+PDZ+KELCH                                    | 979  | LOC109581195 | metazoa | Amphimedon queenslandica | PREDICTED: uncharacterized protein LOC109581195 isoform X1 [Amphimedon queenslandica]        | GCF_000090795.1 | TRADDN-NCOA6 |
| XP_019850627.1 | CARD+CARD+DED+TRADDN-NCOA6+PDZ+KELCH                                    | 965  | LOC109581195 | metazoa | Amphimedon queenslandica | PREDICTED: uncharacterized protein LOC109581195 isoform X2 [Amphimedon queenslandica]        | GCF_000090795.1 | TRADDN-NCOA6 |
| XP_019850628.1 | CARD+CARD+DED+TRADDN-NCOA6+PDZ+KELCH                                    | 964  | LOC109581195 | metazoa | Amphimedon queenslandica | PREDICTED: uncharacterized protein LOC109581195 isoform X3 [Amphimedon queenslandica]        | GCF_000090795.1 | TRADDN-NCOA6 |
| XP_019850632.1 | CARD+CARD+DED+TRADDN-NCOA6+PDZ+KELCH                                    | 982  | LOC109581197 | metazoa | Amphimedon queenslandica | PREDICTED: uncharacterized protein LOC109581197 [Amphimedon queenslandica]                   | GCF_000090795.1 | TRADDN-NCOA6 |
| XP_019863846.1 | CARD+Coiled-coil+DED+TRADDN-NCOA6                                       | 368  | LOC109593016 | metazoa | Amphimedon queenslandica | PREDICTED: uncharacterized protein LOC109593016 [Amphimedon queenslandica]                   | GCF_000090795.1 | TRADDN-NCOA6 |
| XP_019860013.1 | CARD+Death+Death+TRADDN-NCOA6+Coiled-coil+LRRs                          | 772  | LOC109588286 | metazoa | Amphimedon queenslandica | PREDICTED: uncharacterized protein LOC109588286 [Amphimedon queenslandica]                   | GCF_000090795.1 | TRADDN-NCOA6 |
| XP_011408984.2 | CARD+Death+DED+TRADDN-NCOA6+Coiled-coil+Ub-like+Ub-like+Ub-like+Ub-like | 1010 | LOC100632060 | metazoa | Amphimedon queenslandica | PREDICTED: uncharacterized protein LOC100632060 isoform X2 [Amphimedon queenslandica]        | GCF_000090795.1 | TRADDN-NCOA6 |

| acc            | architecture                                                            | len | gen.name     | taxend  | species                  | define                                                                                            | gca             | clade        |
|----------------|-------------------------------------------------------------------------|-----|--------------|---------|--------------------------|---------------------------------------------------------------------------------------------------|-----------------|--------------|
| XP_019849457.1 | CARD+Death+DED+TRADDN-NCOA6+Coiled-coil+Ub-like+Ub-like+Ub-like+Ub-like | 904 | LOC100634889 | metazoa | Amphimedon queenslandica | PREDICTED: ubiquitin carboxyl-terminal hydrolase 47-like [Amphimedon queenslandica]               | GCF_000090795.1 | TRADDN-NCOA6 |
| XP_019852598.1 | CARD+Death+DED+TRADDN-NCOA6+Coiled-coil+Ub-like+Ub-like+Ub-like+Ub-like | 982 | LOC100641592 | metazoa | Amphimedon queenslandica | PREDICTED: ubiquitin carboxyl-terminal hydrolase 47-like [Amphimedon queenslandica]               | GCF_000090795.1 | TRADDN-NCOA6 |
| XP_019849060.1 | CARD+Death+TRADDN-NCOA6+CASPASE                                         | 780 | LOC109580415 | metazoa | Amphimedon queenslandica | PREDICTED: uncharacterized protein LOC109580415 [Amphimedon queenslandica]                        | GCF_000090795.1 | TRADDN-NCOA6 |
| XP_019849061.1 | CARD+Death+TRADDN-NCOA6+CASPASE                                         | 776 | LOC109580416 | metazoa | Amphimedon queenslandica | PREDICTED: uncharacterized protein LOC109580416 isoform X1 [Amphimedon queenslandica]             | GCF_000090795.1 | TRADDN-NCOA6 |
| XP_019849063.1 | CARD+Death+TRADDN-NCOA6+CASPASE                                         | 760 | LOC109580416 | metazoa | Amphimedon queenslandica | PREDICTED: uncharacterized protein LOC109580416 isoform X2 [Amphimedon queenslandica]             | GCF_000090795.1 | TRADDN-NCOA6 |
| XP_019849064.1 | CARD+Death+TRADDN-NCOA6+CASPASE                                         | 770 | LOC109580417 | metazoa | Amphimedon queenslandica | PREDICTED: uncharacterized protein LOC109580417 isoform X1 [Amphimedon queenslandica]             | GCF_000090795.1 | TRADDN-NCOA6 |
| XP_019849065.1 | CARD+Death+TRADDN-NCOA6+CASPASE                                         | 764 | LOC109580417 | metazoa | Amphimedon queenslandica | PREDICTED: uncharacterized protein LOC109580417 isoform X2 [Amphimedon queenslandica]             | GCF_000090795.1 | TRADDN-NCOA6 |
| XP_019852753.1 | CARD+Death+TRADDN-NCOA6+CASPASE                                         | 756 | LOC109582478 | metazoa | Amphimedon queenslandica | PREDICTED: uncharacterized protein LOC109582478 [Amphimedon queenslandica]                        | GCF_000090795.1 | TRADDN-NCOA6 |
| XP_019851638.1 | CARD+DED+TRADDN-NCOA6                                                   | 666 | LOC109581721 | metazoa | Amphimedon queenslandica | PREDICTED: uncharacterized protein LOC109581721 [Amphimedon queenslandica]                        | GCF_000090795.1 | TRADDN-NCOA6 |
| XP_019852755.1 | CARD+DED+TRADDN-NCOA6                                                   | 390 | LOC109582480 | metazoa | Amphimedon queenslandica | PREDICTED: uncharacterized protein LOC109582480 [Amphimedon queenslandica]                        | GCF_000090795.1 | TRADDN-NCOA6 |
| XP_019853775.1 | CARD+DED+TRADDN-NCOA6                                                   | 593 | LOC109583044 | metazoa | Amphimedon queenslandica | PREDICTED: uncharacterized protein LOC109583044 [Amphimedon queenslandica]                        | GCF_000090795.1 | TRADDN-NCOA6 |
| XP_019856613.1 | CARD+DED+TRADDN-NCOA6                                                   | 519 | LOC109585106 | metazoa | Amphimedon queenslandica | PREDICTED: uncharacterized protein LOC109585106 [Amphimedon queenslandica]                        | GCF_000090795.1 | TRADDN-NCOA6 |
| XP_019857199.1 | CARD+DED+TRADDN-NCOA6                                                   | 709 | LOC109585514 | metazoa | Amphimedon queenslandica | PREDICTED: pollen-specific leucine-rich repeat extensin-like protein 2 [Amphimedon queenslandica] | GCF_000090795.1 | TRADDN-NCOA6 |
| XP_019858130.1 | CARD+DED+TRADDN-NCOA6                                                   | 411 | LOC109586384 | metazoa | Amphimedon queenslandica | PREDICTED: uncharacterized protein LOC109586384 [Amphimedon queenslandica]                        | GCF_000090795.1 | TRADDN-NCOA6 |
| XP_019858853.1 | CARD+DED+TRADDN-NCOA6                                                   | 471 | LOC109587076 | metazoa | Amphimedon queenslandica | PREDICTED: uncharacterized protein LOC109587076 [Amphimedon queenslandica]                        | GCF_000090795.1 | TRADDN-NCOA6 |
| XP_019861307.1 | CARD+DED+TRADDN-NCOA6                                                   | 469 | LOC109589711 | metazoa | Amphimedon queenslandica | PREDICTED: uncharacterized protein LOC109589711 [Amphimedon queenslandica]                        | GCF_000090795.1 | TRADDN-NCOA6 |
| XP_019862829.1 | CARD+DED+TRADDN-NCOA6                                                   | 506 | LOC109591555 | metazoa | Amphimedon queenslandica | PREDICTED: uncharacterized protein LOC109591555 [Amphimedon queenslandica]                        | GCF_000090795.1 | TRADDN-NCOA6 |

| acc            | architecture                  | len  | gen.name     | taxend  | species                  | define                                                                                            | gca             | clade        |
|----------------|-------------------------------|------|--------------|---------|--------------------------|---------------------------------------------------------------------------------------------------|-----------------|--------------|
| XP_019863176.1 | CARD+DED+TRADDN-NCOA6         | 359  | LOC109592045 | metazoa | Amphimedon queenslandica | PREDICTED: uncharacterized protein LOC109592045                                                   | GCF_000090795.1 | TRADDN-NCOA6 |
| XP_011406623.2 | CARD+DED+TRADDN-NCOA6+2OGFeDO | 656  | LOC100636424 | metazoa | Amphimedon queenslandica | [Amphimedon queenslandica] PREDICTED: uncharacterized protein LOC100636424 isoform X1             | GCF_000090795.1 | TRADDN-NCOA6 |
| XP_019857326.1 | CARD+DED+TRADDN-NCOA6+2OGFeDO | 551  | LOC100636424 | metazoa | Amphimedon queenslandica | [Amphimedon queenslandica] PREDICTED: uncharacterized protein LOC100636424 isoform X2             | GCF_000090795.1 | TRADDN-NCOA6 |
| XP_019848629.1 | CARD+DED+TRADDN-NCOA6+Ankyrin | 591  | LOC100640609 | metazoa | Amphimedon queenslandica | [Amphimedon queenslandica] PREDICTED: uncharacterized protein LOC100640609                        | GCF_000090795.1 | TRADDN-NCOA6 |
| XP_019850303.1 | CARD+DED+TRADDN-NCOA6+Ankyrin | 1054 | LOC109581027 | metazoa | Amphimedon queenslandica | [Amphimedon queenslandica] PREDICTED: ankyrin repeat domain-containing protein 17-like isoform X1 | GCF_000090795.1 | TRADDN-NCOA6 |
| XP_019850304.1 | CARD+DED+TRADDN-NCOA6+Ankyrin | 956  | LOC109581027 | metazoa | Amphimedon queenslandica | [Amphimedon queenslandica] PREDICTED: ankyrin repeat domain-containing protein 17-like isoform X2 | GCF_000090795.1 | TRADDN-NCOA6 |
| XP_019850305.1 | CARD+DED+TRADDN-NCOA6+Ankyrin | 956  | LOC109581027 | metazoa | Amphimedon queenslandica | [Amphimedon queenslandica] PREDICTED: ankyrin repeat domain-containing protein 17-like isoform X2 | GCF_000090795.1 | TRADDN-NCOA6 |
| XP_019852068.1 | CARD+DED+TRADDN-NCOA6+Ankyrin | 938  | LOC109581980 | metazoa | Amphimedon queenslandica | [Amphimedon queenslandica] PREDICTED: uncharacterized protein LOC109581980                        | GCF_000090795.1 | TRADDN-NCOA6 |
| XP_019854819.1 | CARD+DED+TRADDN-NCOA6+Ankyrin | 377  | LOC109583792 | metazoa | Amphimedon queenslandica | [Amphimedon queenslandica] PREDICTED: uncharacterized protein LOC109583792, partial               | GCF_000090795.1 | TRADDN-NCOA6 |
| XP_019858043.1 | CARD+DED+TRADDN-NCOA6+Ankyrin | 802  | LOC100642029 | metazoa | Amphimedon queenslandica | [Amphimedon queenslandica] PREDICTED: uncharacterized protein LOC100642029                        | GCF_000090795.1 | TRADDN-NCOA6 |
| XP_019858457.1 | CARD+DED+TRADDN-NCOA6+Ankyrin | 642  | LOC109586688 | metazoa | Amphimedon queenslandica | [Amphimedon queenslandica] PREDICTED: uncharacterized protein LOC109586688                        | GCF_000090795.1 | TRADDN-NCOA6 |
| XP_019859180.1 | CARD+DED+TRADDN-NCOA6+Ankyrin | 439  | LOC109587382 | metazoa | Amphimedon queenslandica | [Amphimedon queenslandica] PREDICTED: uncharacterized protein LOC109587382                        | GCF_000090795.1 | TRADDN-NCOA6 |
| XP_019859911.1 | CARD+DED+TRADDN-NCOA6+Ankyrin | 520  | LOC109588171 | metazoa | Amphimedon queenslandica | [Amphimedon queenslandica] PREDICTED: uncharacterized protein LOC109588171                        | GCF_000090795.1 | TRADDN-NCOA6 |
| XP_019860724.1 | CARD+DED+TRADDN-NCOA6+Ankyrin | 546  | LOC109589044 | metazoa | Amphimedon queenslandica | [Amphimedon queenslandica] PREDICTED: uncharacterized protein LOC109589044                        | GCF_000090795.1 | TRADDN-NCOA6 |
| XP_019861310.1 | CARD+DED+TRADDN-NCOA6+Ankyrin | 880  | LOC109589714 | metazoa | Amphimedon queenslandica | [Amphimedon queenslandica] PREDICTED: uncharacterized protein LOC109589714                        | GCF_000090795.1 | TRADDN-NCOA6 |
| XP_019861721.1 | CARD+DED+TRADDN-NCOA6+Ankyrin | 923  | LOC109590240 | metazoa | Amphimedon queenslandica | [Amphimedon queenslandica] PREDICTED: ankyrin repeat and KH domain-containing protein 1-like      | GCF_000090795.1 | TRADDN-NCOA6 |

| acc            | architecture                                                          | len  | gen.name     | taxend  | species                  | define                                                                            | gca             | clade        |
|----------------|-----------------------------------------------------------------------|------|--------------|---------|--------------------------|-----------------------------------------------------------------------------------|-----------------|--------------|
| XP_019851555.1 | CARD+DED+TRADDN-NCOA6+Ankyrin+YafQ_toxin+SF1-helicase+SF1-helicase    | 2856 | LOC109581679 | metazoa | Amphimedon queenslandica | PREDICTED: uncharacterized protein LOC109581679                                   | GCF_000090795.1 | TRADDN-NCOA6 |
| XP_003385831.2 | CARD+DED+TRADDN-NCOA6+Coiled-coil                                     | 544  | LOC100631905 | metazoa | Amphimedon queenslandica | [Amphimedon queenslandica] PREDICTED: uncharacterized protein LOC100631905        | GCF_000090795.1 | TRADDN-NCOA6 |
| XP_019856730.1 | CARD+DED+TRADDN-NCOA6+Coiled-coil+NACHT+LRRs                          | 1406 | LOC109585190 | metazoa | Amphimedon queenslandica | [Amphimedon queenslandica] PREDICTED: uncharacterized protein LOC109585190        | GCF_000090795.1 | TRADDN-NCOA6 |
| XP_019858706.1 | CARD+DED+TRADDN-NCOA6+Coiled-coil+SH3                                 | 534  | LOC109586929 | metazoa | Amphimedon queenslandica | [Amphimedon queenslandica] PREDICTED: uncharacterized protein LOC109586929        | GCF_000090795.1 | TRADDN-NCOA6 |
| XP_019861548.1 | CARD+DED+TRADDN-NCOA6+Coiled-coil+SH3                                 | 503  | LOC109590027 | metazoa | Amphimedon queenslandica | [Amphimedon queenslandica] PREDICTED: uncharacterized protein LOC109590027        | GCF_000090795.1 | TRADDN-NCOA6 |
| XP_019858709.1 | CARD+DED+TRADDN-NCOA6+Coiled-coil+SH3+SH2+SH3                         | 897  | LOC109586932 | metazoa | Amphimedon queenslandica | [Amphimedon queenslandica] PREDICTED: uncharacterized protein LOC109586932        | GCF_000090795.1 | TRADDN-NCOA6 |
| XP_019857393.1 | CARD+DED+TRADDN-NCOA6+Death+DED+DED                                   | 748  | LOC109585709 | metazoa | Amphimedon queenslandica | [Amphimedon queenslandica] PREDICTED: uncharacterized protein LOC109585709        | GCF_000090795.1 | TRADDN-NCOA6 |
| XP_019864256.1 | CARD+DED+TRADDN-NCOA6+SH2+P85+SH2                                     | 998  | LOC100639472 | metazoa | Amphimedon queenslandica | [Amphimedon queenslandica] PREDICTED: uncharacterized protein LOC100639472        | GCF_000090795.1 | TRADDN-NCOA6 |
| XP_023931052.1 | CARD+TRADDN-DEDD2                                                     | 369  | LOC112041699 | metazoa | Lingula anatina          | [Amphimedon queenslandica] uncharacterized protein LOC112041699 [Lingula anatina] | GCF_001039355.2 | TRADDN-DEDD2 |
| XP_023931977.1 | CARD+TRADDN-DEDD2                                                     | 404  | LOC106162832 | metazoa | Lingula anatina          | uncharacterized protein LOC106162832 isoform X1 [Lingula anatina]                 | GCF_001039355.2 | TRADDN-DEDD2 |
| XP_023931978.1 | CARD+TRADDN-DEDD2                                                     | 369  | LOC106162832 | metazoa | Lingula anatina          | uncharacterized protein LOC106162832 isoform X2 [Lingula anatina]                 | GCF_001039355.2 | TRADDN-DEDD2 |
| XP_013396435.2 | CARD+TRADDN-DEDD2+CARD                                                | 626  | LOC106163407 | metazoa | Lingula anatina          | uncharacterized protein LOC106163407 [Lingula anatina]                            | GCF_001039355.2 | TRADDN-DEDD2 |
| XP_013409313.1 | CARD+TRADDN-DEDD2+Coiled-coil+vWA                                     | 858  | LOC106172928 | metazoa | Lingula anatina          | uncharacterized protein LOC106172928 [Lingula anatina]                            | GCF_001039355.2 | TRADDN-DEDD2 |
| XP_023933343.1 | CARD+TRADDN-DEDD2+Coiled-coil+vWA                                     | 834  | LOC106161705 | metazoa | Lingula anatina          | uncharacterized protein LOC106161705 [Lingula anatina]                            | GCF_001039355.2 | TRADDN-DEDD2 |
| XP_013388646.1 | CARD+TRADDN-DEDD2+Coiled-coil+vWA+MIB_HERC2+MIB_HERC2+WWE             | 1221 | LOC106157515 | metazoa | Lingula anatina          | uncharacterized protein LOC106157515 [Lingula anatina]                            | GCF_001039355.2 | TRADDN-DEDD2 |
| XP_013417662.1 | CARD+TRADDN-DEDD2+Coiled-coil+vWA+MIB_HERC2+MIB_HERC2+WWE             | 1192 | LOC106178854 | metazoa | Lingula anatina          | uncharacterized protein LOC106178854 [Lingula anatina]                            | GCF_001039355.2 | TRADDN-DEDD2 |
| XP_013381666.1 | CARD+TRADDN-DEDD2+Coiled-coil+vWA+SH3+SH3                             | 1290 | LOC106152581 | metazoa | Lingula anatina          | uncharacterized protein LOC106152581 [Lingula anatina]                            | GCF_001039355.2 | TRADDN-DEDD2 |
| XP_003389740.1 | CARD+TRADDN-NCOA6+TM+TM                                               | 586  | LOC100632970 | metazoa | Amphimedon queenslandica | PREDICTED: uncharacterized protein LOC100632970                                   | GCF_000090795.1 | TRADDN-NCOA6 |
| XP_013416937.1 | Coiled-coil+CARD+TRADDN-DEDD2+Coiled-coil+vWA                         | 1450 | LOC106178346 | metazoa | Lingula anatina          | [Amphimedon queenslandica] uncharacterized protein LOC106178346 [Lingula anatina] | GCF_001039355.2 | TRADDN-DEDD2 |
| XP_013421821.1 | Coiled-coil+CARD+TRADDN-DEDD2+vWA+Coiled-coil+MIB_HERC2+MIB_HERC2+WWE | 1328 | LOC106181853 | metazoa | Lingula anatina          | uncharacterized protein LOC106181853 [Lingula anatina]                            | GCF_001039355.2 | TRADDN-DEDD2 |

| acc            | architecture                                                          | len  | gen.name     | taxend  | species                  | define                                                                                             | gca             | clade        |
|----------------|-----------------------------------------------------------------------|------|--------------|---------|--------------------------|----------------------------------------------------------------------------------------------------|-----------------|--------------|
| XP_013421834.1 | Coiled-coil+CARD+TRADDN-DEDD2+vWA+Coiled-coil+MIB_HERC2+MIB_HERC2+WWE | 1356 | LOC106181859 | metazoa | Lingula anatina          | uncharacterized protein LOC106181859 [Lingula anatina]                                             | GCF_001039355.2 | TRADDN-DEDD2 |
| XP_023931976.1 | Coiled-coil+FIIND+CARD+TRADDN-DEDD2+Coiled-coil+vWA                   | 855  | LOC106162821 | metazoa | Lingula anatina          | uncharacterized protein LOC106162821 [Lingula anatina]                                             | GCF_001039355.2 | TRADDN-DEDD2 |
| XP_013399402.1 | Coiled-coil+TRADDN-DEDD2+SF2-helicase+HA2                             | 1814 | LOC106165647 | metazoa | Lingula anatina          | uncharacterized protein LOC106165647 [Lingula anatina]                                             | GCF_001039355.2 | TRADDN-DEDD2 |
| XP_019854810.1 | Death+CARD+Death+Death+TRADDN-NCOA6                                   | 574  | LOC105313548 | metazoa | Amphimedon queenslandica | PREDICTED: uncharacterized protein LOC105313548 [Amphimedon queenslandica]                         | GCF_000090795.1 | TRADDN-NCOA6 |
| XP_019854811.1 | Death+CARD+Death+Death+TRADDN-NCOA6                                   | 574  | LOC105313548 | metazoa | Amphimedon queenslandica | PREDICTED: uncharacterized protein LOC105313548 [Amphimedon queenslandica]                         | GCF_000090795.1 | TRADDN-NCOA6 |
| XP_019855266.1 | Death+CARD+Death+Death+TRADDN-NCOA6                                   | 633  | LOC109584104 | metazoa | Amphimedon queenslandica | PREDICTED: uncharacterized protein LOC109584104 [Amphimedon queenslandica]                         | GCF_000090795.1 | TRADDN-NCOA6 |
| XP_019857909.1 | Death+CARD+Death+Death+TRADDN-NCOA6+Coiled-coil                       | 743  | LOC109586179 | metazoa | Amphimedon queenslandica | PREDICTED: uncharacterized protein LOC109586179 isoform X2 [Amphimedon queenslandica]              | GCF_000090795.1 | TRADDN-NCOA6 |
| XP_019860012.1 | Death+CARD+Death+Death+TRADDN-NCOA6+Coiled-coil                       | 736  | LOC109588285 | metazoa | Amphimedon queenslandica | PREDICTED: uncharacterized protein LOC109588285, partial [Amphimedon queenslandica]                | GCF_000090795.1 | TRADDN-NCOA6 |
| XP_011405212.2 | Death+CARD+Death+Death+TRADDN-NCOA6+Coiled-coil+LRRs                  | 960  | LOC105313460 | metazoa | Amphimedon queenslandica | PREDICTED: putative leucine-rich repeat-containing protein DDB_G0290503 [Amphimedon queenslandica] | GCF_000090795.1 | TRADDN-NCOA6 |
| XP_011407704.2 | Death+CARD+Death+Death+TRADDN-NCOA6+Coiled-coil+LRRs                  | 968  | LOC105314951 | metazoa | Amphimedon queenslandica | PREDICTED: uncharacterized protein LOC105314951 [Amphimedon queenslandica]                         | GCF_000090795.1 | TRADDN-NCOA6 |
| XP_019852468.1 | Death+CARD+Death+Death+TRADDN-NCOA6+Coiled-coil+LRRs                  | 902  | LOC109582257 | metazoa | Amphimedon queenslandica | PREDICTED: uncharacterized protein LOC109582257 [Amphimedon queenslandica]                         | GCF_000090795.1 | TRADDN-NCOA6 |
| XP_019854455.1 | Death+CARD+Death+Death+TRADDN-NCOA6+Coiled-coil+LRRs                  | 915  | LOC109583508 | metazoa | Amphimedon queenslandica | PREDICTED: uncharacterized protein LOC109583508 [Amphimedon queenslandica]                         | GCF_000090795.1 | TRADDN-NCOA6 |
| XP_019854600.1 | Death+CARD+Death+Death+TRADDN-NCOA6+Coiled-coil+LRRs                  | 915  | LOC109583619 | metazoa | Amphimedon queenslandica | PREDICTED: uncharacterized protein LOC109583619 [Amphimedon queenslandica]                         | GCF_000090795.1 | TRADDN-NCOA6 |
| XP_019856609.1 | Death+CARD+Death+Death+TRADDN-NCOA6+Coiled-coil+LRRs                  | 956  | LOC100638228 | metazoa | Amphimedon queenslandica | PREDICTED: uncharacterized protein LOC100638228 isoform X1 [Amphimedon queenslandica]              | GCF_000090795.1 | TRADDN-NCOA6 |
| XP_019856610.1 | Death+CARD+Death+Death+TRADDN-NCOA6+Coiled-coil+LRRs                  | 952  | LOC100638228 | metazoa | Amphimedon queenslandica | PREDICTED: uncharacterized protein LOC100638228 isoform X2 [Amphimedon queenslandica]              | GCF_000090795.1 | TRADDN-NCOA6 |
| XP_019856617.1 | Death+CARD+Death+Death+TRADDN-NCOA6+Coiled-coil+LRRs                  | 890  | LOC109585109 | metazoa | Amphimedon queenslandica | PREDICTED: uncharacterized protein LOC109585109 [Amphimedon queenslandica]                         | GCF_000090795.1 | TRADDN-NCOA6 |
| XP_019857908.1 | Death+CARD+Death+Death+TRADDN-NCOA6+Coiled-coil+LRRs                  | 944  | LOC109586179 | metazoa | Amphimedon queenslandica | PREDICTED: uncharacterized protein LOC109586179 isoform X1 [Amphimedon queenslandica]              | GCF_000090795.1 | TRADDN-NCOA6 |
| XP_019860268.1 | Death+CARD+Death+Death+TRADDN-NCOA6+Coiled-coil+LRRs                  | 948  | LOC109588559 | metazoa | Amphimedon queenslandica | PREDICTED: uncharacterized protein LOC109588559 isoform X1 [Amphimedon queenslandica]              | GCF_000090795.1 | TRADDN-NCOA6 |



| acc            | architecture                                                              | len  | gen.name     | taxend  | species                  | define                                                                                | gca             | clade        |
|----------------|---------------------------------------------------------------------------|------|--------------|---------|--------------------------|---------------------------------------------------------------------------------------|-----------------|--------------|
| XP_019860273.1 | Death+CARD+Death+Death+TRADDN-NCOA6+Coiled-coil+LRRs                      | 947  | LOC109588559 | metazoa | Amphimedon queenslandica | PREDICTED: uncharacterized protein LOC109588559 isoform X2 [Amphimedon queenslandica] | GCF_000090795.1 | TRADDN-NCOA6 |
| XP_019860406.1 | Death+CARD+Death+Death+TRADDN-NCOA6+Coiled-coil+LRRs                      | 923  | LOC109588730 | metazoa | Amphimedon queenslandica | PREDICTED: uncharacterized protein LOC109588730 [Amphimedon queenslandica]            | GCF_000090795.1 | TRADDN-NCOA6 |
| XP_019854580.1 | Death+CARD+Death+TRADDN-NCOA6+Coiled-coil+Ub-like+Ub-like+Ub-like         | 1165 | LOC100636162 | metazoa | Amphimedon queenslandica | PREDICTED: uncharacterized protein LOC100636162 [Amphimedon queenslandica]            | GCF_000090795.1 | TRADDN-NCOA6 |
| XP_019850797.1 | Death+CARD+Death+TRADDN-NCOA6+Coiled-coil+Ub-like+Ub-like+Ub-like+Ub-like | 1219 | LOC100632060 | metazoa | Amphimedon queenslandica | PREDICTED: uncharacterized protein LOC100632060 isoform X1 [Amphimedon queenslandica] | GCF_000090795.1 | TRADDN-NCOA6 |
| XP_019858357.1 | Death+CARD+DED+Ankyrin+TRADDN-NCOA6+Ankyrin                               | 1827 | LOC100637643 | metazoa | Amphimedon queenslandica | PREDICTED: uncharacterized protein LOC100637643 [Amphimedon queenslandica]            | GCF_000090795.1 | TRADDN-NCOA6 |
| XP_019851761.1 | Death+CARD+DED+TRADDN-NCOA6                                               | 566  | LOC109581801 | metazoa | Amphimedon queenslandica | PREDICTED: uncharacterized protein LOC109581801 [Amphimedon queenslandica]            | GCF_000090795.1 | TRADDN-NCOA6 |
| XP_019853174.1 | Death+CARD+DED+TRADDN-NCOA6                                               | 487  | LOC109582722 | metazoa | Amphimedon queenslandica | PREDICTED: uncharacterized protein LOC109582722 [Amphimedon queenslandica]            | GCF_000090795.1 | TRADDN-NCOA6 |
| XP_019853511.1 | Death+CARD+DED+TRADDN-NCOA6                                               | 511  | LOC105313190 | metazoa | Amphimedon queenslandica | PREDICTED: uncharacterized protein LOC105313190 [Amphimedon queenslandica]            | GCF_000090795.1 | TRADDN-NCOA6 |
| XP_019858280.1 | Death+CARD+DED+TRADDN-NCOA6                                               | 602  | LOC109586524 | metazoa | Amphimedon queenslandica | PREDICTED: uncharacterized protein LOC109586524 [Amphimedon queenslandica]            | GCF_000090795.1 | TRADDN-NCOA6 |
| XP_019860339.1 | Death+CARD+DED+TRADDN-NCOA6                                               | 525  | LOC109588638 | metazoa | Amphimedon queenslandica | PREDICTED: uncharacterized protein LOC109588638 [Amphimedon queenslandica]            | GCF_000090795.1 | TRADDN-NCOA6 |
| XP_019861958.1 | Death+CARD+DED+TRADDN-NCOA6                                               | 423  | LOC109590492 | metazoa | Amphimedon queenslandica | PREDICTED: uncharacterized protein LOC109590492 [Amphimedon queenslandica]            | GCF_000090795.1 | TRADDN-NCOA6 |
| XP_019852795.1 | Death+CARD+DED+TRADDN-NCOA6+Ankyrin                                       | 1205 | LOC109582504 | metazoa | Amphimedon queenslandica | PREDICTED: uncharacterized protein LOC109582504 [Amphimedon queenslandica]            | GCF_000090795.1 | TRADDN-NCOA6 |
| XP_019862457.1 | Death+CARD+DED+TRADDN-NCOA6+Ankyrin                                       | 760  | LOC109591094 | metazoa | Amphimedon queenslandica | PREDICTED: uncharacterized protein LOC109591094 [Amphimedon queenslandica]            | GCF_000090795.1 | TRADDN-NCOA6 |
| XP_019849880.1 | Death+CARD+DED+TRADDN-NCOA6+Ankyrin+TRADDN-NCOA6+Ankyrin                  | 1433 | LOC109580779 | metazoa | Amphimedon queenslandica | PREDICTED: uncharacterized protein LOC109580779 [Amphimedon queenslandica]            | GCF_000090795.1 | TRADDN-NCOA6 |
| XP_019852232.1 | Death+CARD+DED+TRADDN-NCOA6+Ankyrin+TRADDN-NCOA6+Ankyrin                  | 1642 | LOC109582081 | metazoa | Amphimedon queenslandica | PREDICTED: uncharacterized protein LOC109582081 [Amphimedon queenslandica]            | GCF_000090795.1 | TRADDN-NCOA6 |
| XP_019852233.1 | Death+CARD+DED+TRADDN-NCOA6+Ankyrin+TRADDN-NCOA6+Ankyrin                  | 1642 | LOC109582081 | metazoa | Amphimedon queenslandica | PREDICTED: uncharacterized protein LOC109582081 [Amphimedon queenslandica]            | GCF_000090795.1 | TRADDN-NCOA6 |
| XP_019852234.1 | Death+CARD+DED+TRADDN-NCOA6+Ankyrin+TRADDN-NCOA6+Ankyrin                  | 1642 | LOC109582081 | metazoa | Amphimedon queenslandica | PREDICTED: uncharacterized protein LOC109582081 [Amphimedon queenslandica]            | GCF_000090795.1 | TRADDN-NCOA6 |

| acc            | architecture                                                     | len  | gen.name     | taxend  | species                  | define                                                                                                        | gca             | clade        |
|----------------|------------------------------------------------------------------|------|--------------|---------|--------------------------|---------------------------------------------------------------------------------------------------------------|-----------------|--------------|
| XP_019852235.1 | Death+CARD+DED+TRADDN-NCOA6+Ankyrin+TRADDN-NCOA6+Ankyrin         | 1642 | LOC109582081 | metazoa | Amphimedon queenslandica | PREDICTED: uncharacterized protein LOC109582081 [Amphimedon queenslandica]                                    | GCF_000090795.1 | TRADDN-NCOA6 |
| XP_019852236.1 | Death+CARD+DED+TRADDN-NCOA6+Ankyrin+TRADDN-NCOA6+Ankyrin         | 1642 | LOC109582081 | metazoa | Amphimedon queenslandica | PREDICTED: uncharacterized protein LOC109582081 [Amphimedon queenslandica]                                    | GCF_000090795.1 | TRADDN-NCOA6 |
| XP_019852237.1 | Death+CARD+DED+TRADDN-NCOA6+Ankyrin+TRADDN-NCOA6+Ankyrin         | 1642 | LOC109582081 | metazoa | Amphimedon queenslandica | PREDICTED: uncharacterized protein LOC109582081 [Amphimedon queenslandica]                                    | GCF_000090795.1 | TRADDN-NCOA6 |
| XP_019857877.1 | Death+CARD+DED+TRADDN-NCOA6+Ankyrin+TRADDN-NCOA6+Ankyrin         | 1053 | LOC109586143 | metazoa | Amphimedon queenslandica | PREDICTED: uncharacterized protein LOC109586143 [Amphimedon queenslandica]                                    | GCF_000090795.1 | TRADDN-NCOA6 |
| XP_019858348.1 | Death+CARD+DED+TRADDN-NCOA6+Ankyrin+TRADDN-NCOA6+Ankyrin         | 1255 | LOC109586591 | metazoa | Amphimedon queenslandica | PREDICTED: uncharacterized protein LOC109586591 [Amphimedon queenslandica]                                    | GCF_000090795.1 | TRADDN-NCOA6 |
| XP_019855314.1 | Death+CARD+DED+TRADDN-NCOA6+Ankyrin+YafQ_toxin+SF1-helicase+TPRs | 2897 | LOC100632547 | metazoa | Amphimedon queenslandica | PREDICTED: LOW QUALITY PROTEIN: uncharacterized protein LOC100632547 [Amphimedon queenslandica]               | GCF_000090795.1 | TRADDN-NCOA6 |
| XP_019857167.1 | Death+CARD+DED+TRADDN-NCOA6+Coiled-coil                          | 775  | LOC109585498 | metazoa | Amphimedon queenslandica | PREDICTED: uncharacterized protein MAL8P1.12-like isoform X1 [Amphimedon queenslandica]                       | GCF_000090795.1 | TRADDN-NCOA6 |
| XP_019857168.1 | Death+CARD+DED+TRADDN-NCOA6+Coiled-coil                          | 759  | LOC109585498 | metazoa | Amphimedon queenslandica | PREDICTED: uncharacterized protein MAL8P1.12-like isoform X2 [Amphimedon queenslandica]                       | GCF_000090795.1 | TRADDN-NCOA6 |
| XP_019859490.1 | Death+CARD+DED+TRADDN-NCOA6+Coiled-coil                          | 552  | LOC109587707 | metazoa | Amphimedon queenslandica | PREDICTED: uncharacterized protein LOC109587707 [Amphimedon queenslandica]                                    | GCF_000090795.1 | TRADDN-NCOA6 |
| XP_019863334.1 | Death+CARD+DED+TRADDN-NCOA6+Coiled-coil                          | 754  | LOC105316517 | metazoa | Amphimedon queenslandica | PREDICTED: titin-like [Amphimedon queenslandica]                                                              | GCF_000090795.1 | TRADDN-NCOA6 |
| XP_019857773.1 | Death+CARD+DED+TRADDN-NCOA6+Coiled-coil+Death                    | 739  | LOC109586046 | metazoa | Amphimedon queenslandica | PREDICTED: uncharacterized protein LOC109586046 [Amphimedon queenslandica]                                    | GCF_000090795.1 | TRADDN-NCOA6 |
| XP_011405220.2 | Death+CARD+DED+TRADDN-NCOA6+Coiled-coil+Pkinase                  | 905  | LOC100638861 | metazoa | Amphimedon queenslandica | PREDICTED: centromere-associated protein E-like [Amphimedon queenslandica]                                    | GCF_000090795.1 | TRADDN-NCOA6 |
| XP_019856701.1 | Death+CARD+DED+TRADDN-NCOA6+Coiled-coil+Pkinase                  | 971  | LOC109585159 | metazoa | Amphimedon queenslandica | PREDICTED: putative leucine-rich repeat-containing protein DDB_G0290503 isoform X1 [Amphimedon queenslandica] | GCF_000090795.1 | TRADDN-NCOA6 |
| XP_019856702.1 | Death+CARD+DED+TRADDN-NCOA6+Coiled-coil+Pkinase                  | 970  | LOC109585159 | metazoa | Amphimedon queenslandica | PREDICTED: putative leucine-rich repeat-containing protein DDB_G0290503 isoform X2 [Amphimedon queenslandica] | GCF_000090795.1 | TRADDN-NCOA6 |
| XP_019854978.1 | Death+CARD+DED+TRADDN-NCOA6+Coiled-coil+SH2                      | 688  | LOC109583908 | metazoa | Amphimedon queenslandica | PREDICTED: uncharacterized protein LOC109583908 [Amphimedon queenslandica]                                    | GCF_000090795.1 | TRADDN-NCOA6 |
| XP_019856303.1 | Death+CARD+DED+TRADDN-NCOA6+Coiled-coil+SH3+SH3                  | 665  | LOC100637348 | metazoa | Amphimedon queenslandica | PREDICTED: uncharacterized protein LOC100637348 [Amphimedon queenslandica]                                    | GCF_000090795.1 | TRADDN-NCOA6 |

| acc            | architecture                                    | len | gen.name     | taxend  | species                  | define                                                                                | gca             | clade        |
|----------------|-------------------------------------------------|-----|--------------|---------|--------------------------|---------------------------------------------------------------------------------------|-----------------|--------------|
| XP_019856458.1 | Death+CARD+DED+TRADDN-NCOA6+Coiled-coil+SH3+SH3 | 774 | LOC109584988 | metazoa | Amphimedon queenslandica | PREDICTED: uncharacterized protein LOC109584988                                       | GCF_000090795.1 | TRADDN-NCOA6 |
| XP_019858030.1 | Death+CARD+DED+TRADDN-NCOA6+Death+CARD          | 721 | LOC109586293 | metazoa | Amphimedon queenslandica | [Amphimedon queenslandica] PREDICTED: uncharacterized protein LOC109586293 isoform X1 | GCF_000090795.1 | TRADDN-NCOA6 |
| XP_019858031.1 | Death+CARD+DED+TRADDN-NCOA6+Death+CARD          | 719 | LOC109586293 | metazoa | Amphimedon queenslandica | [Amphimedon queenslandica] PREDICTED: uncharacterized protein LOC109586293 isoform X2 | GCF_000090795.1 | TRADDN-NCOA6 |
| XP_019849161.1 | Death+CARD+DED+TRADDN-NCOA6+LRRs                | 723 | LOC109580450 | metazoa | Amphimedon queenslandica | [Amphimedon queenslandica] PREDICTED: uncharacterized protein LOC109580450            | GCF_000090795.1 | TRADDN-NCOA6 |
| XP_019855983.1 | Death+CARD+DED+TRADDN-NCOA6+LRRs                | 908 | LOC109584611 | metazoa | Amphimedon queenslandica | [Amphimedon queenslandica] PREDICTED: uncharacterized protein LOC109584611            | GCF_000090795.1 | TRADDN-NCOA6 |
| XP_019852029.1 | Death+CARD+DED+TRADDN-NCOA6+Ras                 | 753 | LOC109581957 | metazoa | Amphimedon queenslandica | [Amphimedon queenslandica] PREDICTED: uncharacterized protein LOC109581957            | GCF_000090795.1 | TRADDN-NCOA6 |
| XP_019854903.1 | Death+CARD+DED+TRADDN-NCOA6+TM                  | 624 | LOC109583850 | metazoa | Amphimedon queenslandica | [Amphimedon queenslandica] PREDICTED: uncharacterized protein LOC109583850            | GCF_000090795.1 | TRADDN-NCOA6 |
| XP_019851728.1 | Death+CARD+DED+TRADDN-NCOA6+TM+CASPASE          | 920 | LOC109581770 | metazoa | Amphimedon queenslandica | [Amphimedon queenslandica] PREDICTED: uncharacterized protein LOC109581770 isoform X1 | GCF_000090795.1 | TRADDN-NCOA6 |
| XP_019851729.1 | Death+CARD+DED+TRADDN-NCOA6+TM+CASPASE          | 914 | LOC109581770 | metazoa | Amphimedon queenslandica | [Amphimedon queenslandica] PREDICTED: uncharacterized protein LOC109581770 isoform X2 | GCF_000090795.1 | TRADDN-NCOA6 |
| XP_019860510.1 | Death+CARD+DED+TRADDN-NCOA6+TM+CASPASE          | 964 | LOC109588840 | metazoa | Amphimedon queenslandica | [Amphimedon queenslandica] PREDICTED: uncharacterized protein LOC109588840            | GCF_000090795.1 | TRADDN-NCOA6 |
| XP_019857226.1 | Death+CARD+TRADDN-NCOA6+Coiled-coil+LRRs        | 835 | LOC109585544 | metazoa | Amphimedon queenslandica | [Amphimedon queenslandica] PREDICTED: uncharacterized protein LOC109585544            | GCF_000090795.1 | TRADDN-NCOA6 |
| XP_019858256.1 | Death+CARD+TRADDN-NCOA6+SH3+LRRs                | 728 | LOC109586504 | metazoa | Amphimedon queenslandica | [Amphimedon queenslandica] PREDICTED: uncharacterized protein LOC109586504            | GCF_000090795.1 | TRADDN-NCOA6 |
| XP_003390803.2 | Death+Death+Death+TRADDN-NCOA6                  | 448 | LOC100632849 | metazoa | Amphimedon queenslandica | [Amphimedon queenslandica] PREDICTED: uncharacterized protein LOC100632849            | GCF_000090795.1 | TRADDN-NCOA6 |
| XP_019853778.1 | Death+Death+Death+TRADDN-NCOA6                  | 503 | LOC109583047 | metazoa | Amphimedon queenslandica | [Amphimedon queenslandica] PREDICTED: uncharacterized protein LOC109583047            | GCF_000090795.1 | TRADDN-NCOA6 |
| XP_019857771.1 | Death+Death+Death+TRADDN-NCOA6                  | 331 | LOC109586044 | metazoa | Amphimedon queenslandica | [Amphimedon queenslandica] PREDICTED: uncharacterized protein LOC109586044            | GCF_000090795.1 | TRADDN-NCOA6 |
| XP_019863886.1 | Death+Death+Death+TRADDN-NCOA6                  | 362 | LOC109593080 | metazoa | Amphimedon queenslandica | [Amphimedon queenslandica] PREDICTED: uncharacterized protein LOC109593080            | GCF_000090795.1 | TRADDN-NCOA6 |
| XP_019852724.1 | Death+Death+Death+TRADDN-NCOA6+Coiled-coil      | 579 | LOC109582449 | metazoa | Amphimedon queenslandica | [Amphimedon queenslandica] PREDICTED: uncharacterized protein LOC109582449            | GCF_000090795.1 | TRADDN-NCOA6 |

| acc            | architecture                                        | len  | gen.name     | taxend  | species                  | define                                                                                | gca             | clade        |
|----------------|-----------------------------------------------------|------|--------------|---------|--------------------------|---------------------------------------------------------------------------------------|-----------------|--------------|
| XP_019858064.1 | Death+Death+Death+TRADDN-NCOA6+Coiled-coil          | 752  | LOC109586326 | metazoa | Amphimedon queenslandica | PREDICTED: uncharacterized protein LOC109586326, partial [Amphimedon queenslandica]   | GCF_000090795.1 | TRADDN-NCOA6 |
| XP_019858931.1 | Death+Death+Death+TRADDN-NCOA6+Coiled-coil          | 626  | LOC109587132 | metazoa | Amphimedon queenslandica | PREDICTED: uncharacterized protein LOC109587132 [Amphimedon queenslandica]            | GCF_000090795.1 | TRADDN-NCOA6 |
| XP_019858934.1 | Death+Death+Death+TRADDN-NCOA6+Coiled-coil          | 655  | LOC109587134 | metazoa | Amphimedon queenslandica | PREDICTED: uncharacterized protein LOC109587134 [Amphimedon queenslandica]            | GCF_000090795.1 | TRADDN-NCOA6 |
| XP_019860235.1 | Death+Death+Death+TRADDN-NCOA6+Coiled-coil          | 542  | LOC109588519 | metazoa | Amphimedon queenslandica | PREDICTED: uncharacterized protein LOC109588519 [Amphimedon queenslandica]            | GCF_000090795.1 | TRADDN-NCOA6 |
| XP_019861046.1 | Death+Death+Death+TRADDN-NCOA6+Coiled-coil          | 699  | LOC109589397 | metazoa | Amphimedon queenslandica | PREDICTED: flagellar attachment zone protein 1-like [Amphimedon queenslandica]        | GCF_000090795.1 | TRADDN-NCOA6 |
| XP_019862001.1 | Death+Death+Death+TRADDN-NCOA6+Coiled-coil          | 565  | LOC109590542 | metazoa | Amphimedon queenslandica | PREDICTED: uncharacterized protein LOC109590542, partial [Amphimedon queenslandica]   | GCF_000090795.1 | TRADDN-NCOA6 |
| XP_011407286.2 | Death+Death+Death+TRADDN-NCOA6+Coiled-coil+HD       | 1081 | LOC105314677 | metazoa | Amphimedon queenslandica | PREDICTED: uncharacterized protein LOC105314677 [Amphimedon queenslandica]            | GCF_000090795.1 | TRADDN-NCOA6 |
| XP_019855145.1 | Death+Death+Death+TRADDN-NCOA6+Coiled-coil+HD       | 958  | LOC109584024 | metazoa | Amphimedon queenslandica | PREDICTED: uncharacterized protein LOC109584024 [Amphimedon queenslandica]            | GCF_000090795.1 | TRADDN-NCOA6 |
| XP_019858068.1 | Death+Death+Death+TRADDN-NCOA6+Coiled-coil+HD       | 1139 | LOC109586329 | metazoa | Amphimedon queenslandica | PREDICTED: uncharacterized protein LOC109586329 isoform X1 [Amphimedon queenslandica] | GCF_000090795.1 | TRADDN-NCOA6 |
| XP_019858069.1 | Death+Death+Death+TRADDN-NCOA6+Coiled-coil+HD       | 1125 | LOC109586329 | metazoa | Amphimedon queenslandica | PREDICTED: uncharacterized protein LOC109586329 isoform X2 [Amphimedon queenslandica] | GCF_000090795.1 | TRADDN-NCOA6 |
| XP_019858070.1 | Death+Death+Death+TRADDN-NCOA6+Coiled-coil+HD       | 1109 | LOC109586329 | metazoa | Amphimedon queenslandica | PREDICTED: uncharacterized protein LOC109586329 isoform X3 [Amphimedon queenslandica] | GCF_000090795.1 | TRADDN-NCOA6 |
| XP_019858071.1 | Death+Death+Death+TRADDN-NCOA6+Coiled-coil+SH3      | 596  | LOC100632133 | metazoa | Amphimedon queenslandica | PREDICTED: uncharacterized protein LOC100632133 isoform X1 [Amphimedon queenslandica] | GCF_000090795.1 | TRADDN-NCOA6 |
| XP_019858072.1 | Death+Death+Death+TRADDN-NCOA6+Coiled-coil+SH3      | 593  | LOC100632133 | metazoa | Amphimedon queenslandica | PREDICTED: uncharacterized protein LOC100632133 isoform X2 [Amphimedon queenslandica] | GCF_000090795.1 | TRADDN-NCOA6 |
| XP_019858830.1 | Death+Death+Death+TRADDN-NCOA6+Coiled-coil+SH3      | 692  | LOC109587056 | metazoa | Amphimedon queenslandica | PREDICTED: uncharacterized protein LOC109587056, partial [Amphimedon queenslandica]   | GCF_000090795.1 | TRADDN-NCOA6 |
| XP_019852151.1 | Death+Death+Death+TRADDN-NCOA6+Coiled-coil+SH3+LRRs | 929  | LOC109582031 | metazoa | Amphimedon queenslandica | PREDICTED: uncharacterized protein LOC109582031 isoform X1 [Amphimedon queenslandica] | GCF_000090795.1 | TRADDN-NCOA6 |
| XP_019852152.1 | Death+Death+Death+TRADDN-NCOA6+Coiled-coil+SH3+LRRs | 928  | LOC109582031 | metazoa | Amphimedon queenslandica | PREDICTED: uncharacterized protein LOC109582031 isoform X2 [Amphimedon queenslandica] | GCF_000090795.1 | TRADDN-NCOA6 |
| XP_019852153.1 | Death+Death+Death+TRADDN-NCOA6+Coiled-coil+SH3+LRRs | 928  | LOC109582031 | metazoa | Amphimedon queenslandica | PREDICTED: uncharacterized protein LOC109582031 isoform X3 [Amphimedon queenslandica] | GCF_000090795.1 | TRADDN-NCOA6 |

| acc            | architecture                                                 | len  | gen.name     | taxend  | species                  | define                                                                                | gca             | clade        |
|----------------|--------------------------------------------------------------|------|--------------|---------|--------------------------|---------------------------------------------------------------------------------------|-----------------|--------------|
| XP_019852564.1 | Death+Death+Death+TRADDN-NCOA6+Coiled-coil+SH3+LRRs          | 937  | LOC109582341 | metazoa | Amphimedon queenslandica | PREDICTED: uncharacterized protein LOC109582341 isoform X1 [Amphimedon queenslandica] | GCF_000090795.1 | TRADDN-NCOA6 |
| XP_019852565.1 | Death+Death+Death+TRADDN-NCOA6+Coiled-coil+SH3+LRRs          | 935  | LOC109582341 | metazoa | Amphimedon queenslandica | PREDICTED: uncharacterized protein LOC109582341 isoform X2 [Amphimedon queenslandica] | GCF_000090795.1 | TRADDN-NCOA6 |
| XP_019853828.1 | Death+Death+Death+TRADDN-NCOA6+Coiled-coil+SH3+LRRs          | 928  | LOC109583095 | metazoa | Amphimedon queenslandica | PREDICTED: uncharacterized protein LOC109583095 [Amphimedon queenslandica]            | GCF_000090795.1 | TRADDN-NCOA6 |
| XP_019857076.1 | Death+Death+Death+TRADDN-NCOA6+Coiled-coil+SH3+LRRs          | 922  | LOC105314204 | metazoa | Amphimedon queenslandica | PREDICTED: uncharacterized protein LOC105314204 [Amphimedon queenslandica]            | GCF_000090795.1 | TRADDN-NCOA6 |
| XP_019857726.1 | Death+Death+Death+TRADDN-NCOA6+Coiled-coil+SH3+LRRs          | 900  | LOC109586006 | metazoa | Amphimedon queenslandica | PREDICTED: uncharacterized protein LOC109586006 isoform X1 [Amphimedon queenslandica] | GCF_000090795.1 | TRADDN-NCOA6 |
| XP_019857727.1 | Death+Death+Death+TRADDN-NCOA6+Coiled-coil+SH3+LRRs          | 896  | LOC109586006 | metazoa | Amphimedon queenslandica | PREDICTED: uncharacterized protein LOC109586006 isoform X2 [Amphimedon queenslandica] | GCF_000090795.1 | TRADDN-NCOA6 |
| XP_019857728.1 | Death+Death+Death+TRADDN-NCOA6+Coiled-coil+SH3+LRRs          | 893  | LOC109586006 | metazoa | Amphimedon queenslandica | PREDICTED: uncharacterized protein LOC109586006 isoform X3 [Amphimedon queenslandica] | GCF_000090795.1 | TRADDN-NCOA6 |
| XP_019857729.1 | Death+Death+Death+TRADDN-NCOA6+Coiled-coil+SH3+LRRs          | 858  | LOC109586006 | metazoa | Amphimedon queenslandica | PREDICTED: uncharacterized protein LOC109586006 isoform X4 [Amphimedon queenslandica] | GCF_000090795.1 | TRADDN-NCOA6 |
| XP_019858258.1 | Death+Death+Death+TRADDN-NCOA6+Coiled-coil+SH3+LRRs          | 928  | LOC109586505 | metazoa | Amphimedon queenslandica | PREDICTED: uncharacterized protein LOC109586505 isoform X1 [Amphimedon queenslandica] | GCF_000090795.1 | TRADDN-NCOA6 |
| XP_019858259.1 | Death+Death+Death+TRADDN-NCOA6+Coiled-coil+SH3+LRRs          | 928  | LOC109586505 | metazoa | Amphimedon queenslandica | PREDICTED: uncharacterized protein LOC109586505 isoform X2 [Amphimedon queenslandica] | GCF_000090795.1 | TRADDN-NCOA6 |
| XP_019858260.1 | Death+Death+Death+TRADDN-NCOA6+Coiled-coil+SH3+LRRs          | 928  | LOC109586505 | metazoa | Amphimedon queenslandica | PREDICTED: uncharacterized protein LOC109586505 isoform X3 [Amphimedon queenslandica] | GCF_000090795.1 | TRADDN-NCOA6 |
| XP_019858609.1 | Death+Death+Death+TRADDN-NCOA6+Coiled-coil+SH3+LRRs          | 846  | LOC109586830 | metazoa | Amphimedon queenslandica | PREDICTED: uncharacterized protein LOC109586830 [Amphimedon queenslandica]            | GCF_000090795.1 | TRADDN-NCOA6 |
| XP_019858845.1 | Death+Death+Death+TRADDN-NCOA6+Coiled-coil+SH3+LRRs          | 919  | LOC109587067 | metazoa | Amphimedon queenslandica | PREDICTED: uncharacterized protein LOC109587067 [Amphimedon queenslandica]            | GCF_000090795.1 | TRADDN-NCOA6 |
| XP_019860967.1 | Death+Death+Death+TRADDN-NCOA6+Coiled-coil+SH3+LRRs          | 822  | LOC100638444 | metazoa | Amphimedon queenslandica | PREDICTED: uncharacterized protein LOC100638444 [Amphimedon queenslandica]            | GCF_000090795.1 | TRADDN-NCOA6 |
| XP_019857549.1 | Death+Death+Death+TRADDN-NCOA6+Coiled-coil+TM+TM             | 841  | LOC109585848 | metazoa | Amphimedon queenslandica | PREDICTED: uncharacterized protein LOC109585848 [Amphimedon queenslandica]            | GCF_000090795.1 | TRADDN-NCOA6 |
| XP_019857556.1 | Death+Death+Death+TRADDN-NCOA6+Coiled-coil+TM+TM             | 829  | LOC109585852 | metazoa | Amphimedon queenslandica | PREDICTED: uncharacterized protein LOC109585852 [Amphimedon queenslandica]            | GCF_000090795.1 | TRADDN-NCOA6 |
| XP_011404451.1 | Death+Death+DED+TRADDN-NCOA6+Coiled-coil+SH3+SH3+SH2+Pkinase | 1170 | LOC105313037 | metazoa | Amphimedon queenslandica | PREDICTED: uncharacterized protein LOC105313037 [Amphimedon queenslandica]            | GCF_000090795.1 | TRADDN-NCOA6 |

| acc            | architecture                                                 | len  | gen.name     | taxend  | species                  | define                                                                                | gca             | clade        |
|----------------|--------------------------------------------------------------|------|--------------|---------|--------------------------|---------------------------------------------------------------------------------------|-----------------|--------------|
| XP_019856453.1 | Death+Death+DED+TRADDN-NCOA6+Coiled-coil+SH3+SH3+SH2+Pkinase | 1199 | LOC100638653 | metazoa | Amphimedon queenslandica | PREDICTED: uncharacterized protein LOC100638653 isoform X1 [Amphimedon queenslandica] | GCF_000090795.1 | TRADDN-NCOA6 |
| XP_019856454.1 | Death+Death+DED+TRADDN-NCOA6+Coiled-coil+SH3+SH3+SH2+Pkinase | 1195 | LOC100638653 | metazoa | Amphimedon queenslandica | PREDICTED: uncharacterized protein LOC100638653 isoform X2 [Amphimedon queenslandica] | GCF_000090795.1 | TRADDN-NCOA6 |
| XP_019856456.1 | Death+Death+DED+TRADDN-NCOA6+Coiled-coil+SH3+SH3+SH2+Pkinase | 1133 | LOC100638399 | metazoa | Amphimedon queenslandica | PREDICTED: uncharacterized protein LOC100638399 [Amphimedon queenslandica]            | GCF_000090795.1 | TRADDN-NCOA6 |
| XP_019856457.1 | Death+Death+DED+TRADDN-NCOA6+Coiled-coil+SH3+SH3+SH2+Pkinase | 1084 | LOC100638525 | metazoa | Amphimedon queenslandica | PREDICTED: uncharacterized protein LOC100638525 [Amphimedon queenslandica]            | GCF_000090795.1 | TRADDN-NCOA6 |
| XP_019859170.1 | Death+Death+DED+TRADDN-NCOA6+Coiled-coil+SH3+SH3+SH2+Pkinase | 1121 | LOC100642077 | metazoa | Amphimedon queenslandica | PREDICTED: uncharacterized protein LOC100642077 isoform X1 [Amphimedon queenslandica] | GCF_000090795.1 | TRADDN-NCOA6 |
| XP_019859171.1 | Death+Death+DED+TRADDN-NCOA6+Coiled-coil+SH3+SH3+SH2+Pkinase | 1118 | LOC100642077 | metazoa | Amphimedon queenslandica | PREDICTED: uncharacterized protein LOC100642077 isoform X2 [Amphimedon queenslandica] | GCF_000090795.1 | TRADDN-NCOA6 |
| XP_019859172.1 | Death+Death+DED+TRADDN-NCOA6+Coiled-coil+SH3+SH3+SH2+Pkinase | 1117 | LOC100642077 | metazoa | Amphimedon queenslandica | PREDICTED: uncharacterized protein LOC100642077 isoform X3 [Amphimedon queenslandica] | GCF_000090795.1 | TRADDN-NCOA6 |
| XP_019856071.1 | Death+Death+Ras+wHTH+wHTH+COR+TRADDN-NCOA6+TM                | 1211 | LOC109584694 | metazoa | Amphimedon queenslandica | PREDICTED: uncharacterized protein LOC109584694, partial [Amphimedon queenslandica]   | GCF_000090795.1 | TRADDN-NCOA6 |
| XP_019863286.1 | Death+Death+TRADDN-NCOA6                                     | 418  | LOC109592211 | metazoa | Amphimedon queenslandica | PREDICTED: uncharacterized protein LOC109592211, partial [Amphimedon queenslandica]   | GCF_000090795.1 | TRADDN-NCOA6 |
| XP_019863443.1 | Death+Death+TRADDN-NCOA6                                     | 349  | LOC109592451 | metazoa | Amphimedon queenslandica | PREDICTED: uncharacterized protein LOC109592451, partial [Amphimedon queenslandica]   | GCF_000090795.1 | TRADDN-NCOA6 |
| XP_019852575.1 | Death+Death+TRADDN-NCOA6+Coiled-coil                         | 447  | LOC109582349 | metazoa | Amphimedon queenslandica | PREDICTED: uncharacterized protein LOC109582349 [Amphimedon queenslandica]            | GCF_000090795.1 | TRADDN-NCOA6 |
| XP_019855219.1 | Death+Death+TRADDN-NCOA6+Coiled-coil                         | 435  | LOC109584075 | metazoa | Amphimedon queenslandica | PREDICTED: uncharacterized protein LOC109584075 [Amphimedon queenslandica]            | GCF_000090795.1 | TRADDN-NCOA6 |
| XP_019862587.1 | Death+Death+TRADDN-NCOA6+Coiled-coil                         | 439  | LOC109591263 | metazoa | Amphimedon queenslandica | PREDICTED: uncharacterized protein LOC109591263, partial [Amphimedon queenslandica]   | GCF_000090795.1 | TRADDN-NCOA6 |
| XP_019860407.1 | Death+Death+TRADDN-NCOA6+Coiled-coil+LRRs                    | 686  | LOC109588731 | metazoa | Amphimedon queenslandica | PREDICTED: uncharacterized protein LOC109588731 isoform X1 [Amphimedon queenslandica] | GCF_000090795.1 | TRADDN-NCOA6 |
| XP_019860408.1 | Death+Death+TRADDN-NCOA6+Coiled-coil+LRRs                    | 653  | LOC109588731 | metazoa | Amphimedon queenslandica | PREDICTED: uncharacterized protein LOC109588731 isoform X2 [Amphimedon queenslandica] | GCF_000090795.1 | TRADDN-NCOA6 |
| XP_019858939.1 | Death+Death+TRADDN-NCOA6+Coiled-coil+SH3                     | 589  | LOC109587144 | metazoa | Amphimedon queenslandica | PREDICTED: uncharacterized protein LOC109587144 [Amphimedon queenslandica]            | GCF_000090795.1 | TRADDN-NCOA6 |
| XP_019857436.1 | Death+Death+TRADDN-NCOA6+Coiled-coil+SH3+LRRs                | 677  | LOC109585750 | metazoa | Amphimedon queenslandica | PREDICTED: uncharacterized protein LOC109585750 [Amphimedon queenslandica]            | GCF_000090795.1 | TRADDN-NCOA6 |

| acc            | architecture                                     | len  | gen.name     | taxend  | species                  | define                                                                                          | gca             | clade        |
|----------------|--------------------------------------------------|------|--------------|---------|--------------------------|-------------------------------------------------------------------------------------------------|-----------------|--------------|
| XP_019858625.1 | Death+Death+TRADDN-NCOA6+Coiled-coil+SH3+LRRs    | 775  | LOC109586842 | metazoa | Amphimedon queenslandica | PREDICTED: uncharacterized protein LOC109586842                                                 | GCF_000090795.1 | TRADDN-NCOA6 |
| XP_019850243.1 | Death+Death+TRADDN-NCOA6+UPA+UPA+UPA+Coiled-coil | 1176 | LOC109580999 | metazoa | Amphimedon queenslandica | [Amphimedon queenslandica] PREDICTED: uncharacterized protein LOC109580999                      | GCF_000090795.1 | TRADDN-NCOA6 |
| XP_019853792.1 | Death+DED+TRADDN-NCOA6                           | 380  | LOC109583061 | metazoa | Amphimedon queenslandica | [Amphimedon queenslandica] PREDICTED: uncharacterized protein LOC109583061                      | GCF_000090795.1 | TRADDN-NCOA6 |
| XP_019855769.1 | Death+DED+TRADDN-NCOA6                           | 475  | LOC109584462 | metazoa | Amphimedon queenslandica | [Amphimedon queenslandica] PREDICTED: uncharacterized protein LOC109584462                      | GCF_000090795.1 | TRADDN-NCOA6 |
| XP_019858668.1 | Death+DED+TRADDN-NCOA6                           | 411  | LOC100636127 | metazoa | Amphimedon queenslandica | [Amphimedon queenslandica] PREDICTED: uncharacterized protein LOC100636127                      | GCF_000090795.1 | TRADDN-NCOA6 |
| XP_019859535.1 | Death+DED+TRADDN-NCOA6                           | 344  | LOC109587752 | metazoa | Amphimedon queenslandica | [Amphimedon queenslandica] PREDICTED: uncharacterized protein LOC109587752                      | GCF_000090795.1 | TRADDN-NCOA6 |
| XP_019860511.1 | Death+DED+TRADDN-NCOA6                           | 684  | LOC109588841 | metazoa | Amphimedon queenslandica | [Amphimedon queenslandica] PREDICTED: uncharacterized protein LOC109588841                      | GCF_000090795.1 | TRADDN-NCOA6 |
| XP_019861361.1 | Death+DED+TRADDN-NCOA6                           | 395  | LOC109589786 | metazoa | Amphimedon queenslandica | [Amphimedon queenslandica] PREDICTED: uncharacterized protein LOC109589786                      | GCF_000090795.1 | TRADDN-NCOA6 |
| XP_019861554.1 | Death+DED+TRADDN-NCOA6                           | 316  | LOC109590031 | metazoa | Amphimedon queenslandica | [Amphimedon queenslandica] PREDICTED: uncharacterized protein LOC109590031                      | GCF_000090795.1 | TRADDN-NCOA6 |
| XP_019864104.1 | Death+DED+TRADDN-NCOA6                           | 331  | LOC109593486 | metazoa | Amphimedon queenslandica | [Amphimedon queenslandica] PREDICTED: uncharacterized protein LOC109593486, partial             | GCF_000090795.1 | TRADDN-NCOA6 |
| XP_011403628.1 | Death+DED+TRADDN-NCOA6+Ankyrin                   | 882  | LOC105312571 | metazoa | Amphimedon queenslandica | [Amphimedon queenslandica] PREDICTED: ankyrin-1-like                                            | GCF_000090795.1 | TRADDN-NCOA6 |
| XP_011403949.1 | Death+DED+TRADDN-NCOA6+Ankyrin                   | 906  | LOC105312758 | metazoa | Amphimedon queenslandica | [Amphimedon queenslandica] PREDICTED: ankyrin repeat domain-containing protein 50-like          | GCF_000090795.1 | TRADDN-NCOA6 |
| XP_011406422.1 | Death+DED+TRADDN-NCOA6+Ankyrin                   | 752  | LOC105314137 | metazoa | Amphimedon queenslandica | [Amphimedon queenslandica] PREDICTED: ankyrin-1-like                                            | GCF_000090795.1 | TRADDN-NCOA6 |
| XP_011406888.1 | Death+DED+TRADDN-NCOA6+Ankyrin                   | 428  | LOC105314419 | metazoa | Amphimedon queenslandica | [Amphimedon queenslandica] PREDICTED: uncharacterized protein LOC105314419                      | GCF_000090795.1 | TRADDN-NCOA6 |
| XP_011407078.1 | Death+DED+TRADDN-NCOA6+Ankyrin                   | 1103 | LOC105314542 | metazoa | Amphimedon queenslandica | [Amphimedon queenslandica] PREDICTED: ankyrin repeat domain-containing protein 17-like, partial | GCF_000090795.1 | TRADDN-NCOA6 |
| XP_011408079.1 | Death+DED+TRADDN-NCOA6+Ankyrin                   | 591  | LOC105315218 | metazoa | Amphimedon queenslandica | [Amphimedon queenslandica] PREDICTED: uncharacterized protein LOC105315218                      | GCF_000090795.1 | TRADDN-NCOA6 |
| XP_011408586.1 | Death+DED+TRADDN-NCOA6+Ankyrin                   | 453  | LOC105315583 | metazoa | Amphimedon queenslandica | [Amphimedon queenslandica] PREDICTED: uncharacterized protein LOC105315583                      | GCF_000090795.1 | TRADDN-NCOA6 |
| XP_019851760.1 | Death+DED+TRADDN-NCOA6+Ankyrin                   | 557  | LOC109581800 | metazoa | Amphimedon queenslandica | [Amphimedon queenslandica] PREDICTED: uncharacterized protein LOC109581800                      | GCF_000090795.1 | TRADDN-NCOA6 |

| acc            | architecture                                                              | len  | gen.name     | taxend  | species                  | define                                                                                                      | gca             | clade        |
|----------------|---------------------------------------------------------------------------|------|--------------|---------|--------------------------|-------------------------------------------------------------------------------------------------------------|-----------------|--------------|
| XP_019855944.1 | Death+DED+TRADDN-NCOA6+Ankyrin                                            | 486  | LOC109584591 | metazoa | Amphimedon queenslandica | PREDICTED: KN motif and ankyrin repeat domain-containing protein 1-like, partial [Amphimedon queenslandica] | GCF_000090795.1 | TRADDN-NCOA6 |
| XP_019857239.1 | Death+DED+TRADDN-NCOA6+Ankyrin                                            | 718  | LOC109585560 | metazoa | Amphimedon queenslandica | PREDICTED: uncharacterized protein LOC109585560 [Amphimedon queenslandica]                                  | GCF_000090795.1 | TRADDN-NCOA6 |
| XP_019858058.1 | Death+DED+TRADDN-NCOA6+Ankyrin                                            | 881  | LOC105315225 | metazoa | Amphimedon queenslandica | PREDICTED: LOW QUALITY PROTEIN: uncharacterized protein LOC105315225 [Amphimedon queenslandica]             | GCF_000090795.1 | TRADDN-NCOA6 |
| XP_019858242.1 | Death+DED+TRADDN-NCOA6+Ankyrin                                            | 407  | LOC109586486 | metazoa | Amphimedon queenslandica | PREDICTED: uncharacterized protein LOC109586486 [Amphimedon queenslandica]                                  | GCF_000090795.1 | TRADDN-NCOA6 |
| XP_019858786.1 | Death+DED+TRADDN-NCOA6+Ankyrin                                            | 560  | LOC109587006 | metazoa | Amphimedon queenslandica | PREDICTED: uncharacterized protein LOC109587006 [Amphimedon queenslandica]                                  | GCF_000090795.1 | TRADDN-NCOA6 |
| XP_019860877.1 | Death+DED+TRADDN-NCOA6+Ankyrin                                            | 425  | LOC109589205 | metazoa | Amphimedon queenslandica | PREDICTED: uncharacterized protein LOC109589205 [Amphimedon queenslandica]                                  | GCF_000090795.1 | TRADDN-NCOA6 |
| XP_019861228.1 | Death+DED+TRADDN-NCOA6+Ankyrin                                            | 561  | LOC109589610 | metazoa | Amphimedon queenslandica | PREDICTED: uncharacterized protein LOC109589610 [Amphimedon queenslandica]                                  | GCF_000090795.1 | TRADDN-NCOA6 |
| XP_019862298.1 | Death+DED+TRADDN-NCOA6+Ankyrin                                            | 532  | LOC105315602 | metazoa | Amphimedon queenslandica | PREDICTED: uncharacterized protein LOC105315602, partial [Amphimedon queenslandica]                         | GCF_000090795.1 | TRADDN-NCOA6 |
| XP_019857240.1 | Death+DED+TRADDN-NCOA6+Ankyrin+Coiled-coil                                | 607  | LOC109585562 | metazoa | Amphimedon queenslandica | PREDICTED: uncharacterized protein LOC109585562 [Amphimedon queenslandica]                                  | GCF_000090795.1 | TRADDN-NCOA6 |
| XP_019855945.1 | Death+DED+TRADDN-NCOA6+Ankyrin+Death+DED+TRADDN-NCOA6+Ankyrin             | 1464 | LOC109584592 | metazoa | Amphimedon queenslandica | PREDICTED: uncharacterized protein LOC109584592 [Amphimedon queenslandica]                                  | GCF_000090795.1 | TRADDN-NCOA6 |
| XP_019860958.1 | Death+DED+TRADDN-NCOA6+Ankyrin+Death+DED+TRADDN-NCOA6+Ankyrin+Coiled-coil | 980  | LOC109589295 | metazoa | Amphimedon queenslandica | PREDICTED: uncharacterized protein LOC109589295 [Amphimedon queenslandica]                                  | GCF_000090795.1 | TRADDN-NCOA6 |
| XP_019852568.1 | Death+DED+TRADDN-NCOA6+Ankyrin+SH3+LRRs                                   | 948  | LOC109582345 | metazoa | Amphimedon queenslandica | PREDICTED: uncharacterized protein LOC109582345 [Amphimedon queenslandica]                                  | GCF_000090795.1 | TRADDN-NCOA6 |
| XP_019848838.1 | Death+DED+TRADDN-NCOA6+Coiled-coil+MATH+MATH                              | 1052 | LOC109580272 | metazoa | Amphimedon queenslandica | PREDICTED: uncharacterized protein LOC109580272 [Amphimedon queenslandica]                                  | GCF_000090795.1 | TRADDN-NCOA6 |
| XP_019851434.1 | Death+DED+TRADDN-NCOA6+Coiled-coil+MATH+MATH                              | 1010 | LOC109581612 | metazoa | Amphimedon queenslandica | PREDICTED: uncharacterized protein LOC109581612 isoform X2 [Amphimedon queenslandica]                       | GCF_000090795.1 | TRADDN-NCOA6 |
| XP_019854917.1 | Death+DED+TRADDN-NCOA6+Coiled-coil+MATH+MATH                              | 930  | LOC109583857 | metazoa | Amphimedon queenslandica | PREDICTED: kinectin-like [Amphimedon queenslandica]                                                         | GCF_000090795.1 | TRADDN-NCOA6 |
| XP_019857635.1 | Death+DED+TRADDN-NCOA6+Coiled-coil+MATH+MATH                              | 1122 | LOC109585927 | metazoa | Amphimedon queenslandica | PREDICTED: WEB family protein At4g27595, chloroplastic-like [Amphimedon queenslandica]                      | GCF_000090795.1 | TRADDN-NCOA6 |
| XP_019859161.1 | Death+DED+TRADDN-NCOA6+Coiled-coil+MATH+MATH                              | 988  | LOC109587362 | metazoa | Amphimedon queenslandica | PREDICTED: uncharacterized protein LOC109587362 [Amphimedon queenslandica]                                  | GCF_000090795.1 | TRADDN-NCOA6 |



| acc            | architecture                                                                            | len  | gen.name     | taxend  | species                  | define                                                                                | gca             | clade        |
|----------------|-----------------------------------------------------------------------------------------|------|--------------|---------|--------------------------|---------------------------------------------------------------------------------------|-----------------|--------------|
| XP_019858737.1 | Death+DED+TRADDN-NCOA6+Coiled-coil+Ub-like+Ub-like                                      | 748  | LOC100639420 | metazoa | Amphimedon queenslandica | PREDICTED: uncharacterized protein LOC100639420                                       | GCF_000090795.1 | TRADDN-NCOA6 |
| XP_019855003.1 | Death+DED+TRADDN-NCOA6+LRRs                                                             | 709  | LOC109583922 | metazoa | Amphimedon queenslandica | [Amphimedon queenslandica] PREDICTED: uncharacterized protein LOC109583922 isoform X1 | GCF_000090795.1 | TRADDN-NCOA6 |
| XP_019855004.1 | Death+DED+TRADDN-NCOA6+LRRs                                                             | 708  | LOC109583922 | metazoa | Amphimedon queenslandica | [Amphimedon queenslandica] PREDICTED: uncharacterized protein LOC109583922 isoform X2 | GCF_000090795.1 | TRADDN-NCOA6 |
| XP_019855005.1 | Death+DED+TRADDN-NCOA6+LRRs                                                             | 681  | LOC109583922 | metazoa | Amphimedon queenslandica | [Amphimedon queenslandica] PREDICTED: uncharacterized protein LOC109583922 isoform X3 | GCF_000090795.1 | TRADDN-NCOA6 |
| XP_019854336.1 | Death+DED+TRADDN-NCOA6+Pkinase                                                          | 694  | LOC109583430 | metazoa | Amphimedon queenslandica | [Amphimedon queenslandica] PREDICTED: uncharacterized protein LOC109583430            | GCF_000090795.1 | TRADDN-NCOA6 |
| XP_019859623.1 | Death+DED+TRADDN-NCOA6+Pkinase                                                          | 774  | LOC109587843 | metazoa | Amphimedon queenslandica | [Amphimedon queenslandica] PREDICTED: uncharacterized protein LOC109587843            | GCF_000090795.1 | TRADDN-NCOA6 |
| XP_019861886.1 | Death+DED+TRADDN-NCOA6+PNPase                                                           | 553  | LOC109590401 | metazoa | Amphimedon queenslandica | [Amphimedon queenslandica] PREDICTED: uncharacterized protein LOC109590401            | GCF_000090795.1 | TRADDN-NCOA6 |
| XP_019854783.1 | Death+DED+TRADDN-NCOA6+TM                                                               | 357  | LOC105314141 | metazoa | Amphimedon queenslandica | [Amphimedon queenslandica] PREDICTED: uncharacterized protein LOC105314141            | GCF_000090795.1 | TRADDN-NCOA6 |
| XP_019858854.1 | Death+DED+TRADDN-NCOA6+TM+TM+TM+TM+TM+TM                                                | 710  | LOC109587077 | metazoa | Amphimedon queenslandica | [Amphimedon queenslandica] PREDICTED: uncharacterized protein LOC109587077            | GCF_000090795.1 | TRADDN-NCOA6 |
| XP_019858855.1 | Death+DED+TRADDN-NCOA6+TM+TM+TM+TM+TM+TM                                                | 710  | LOC109587077 | metazoa | Amphimedon queenslandica | [Amphimedon queenslandica] PREDICTED: uncharacterized protein LOC109587077            | GCF_000090795.1 | TRADDN-NCOA6 |
| XP_019858856.1 | Death+DED+TRADDN-NCOA6+TM+TM+TM+TM+TM+TM                                                | 659  | LOC109587078 | metazoa | Amphimedon queenslandica | [Amphimedon queenslandica] PREDICTED: uncharacterized protein LOC109587078            | GCF_000090795.1 | TRADDN-NCOA6 |
| XP_019858858.1 | Death+DED+TRADDN-NCOA6+TM+TM+TM+TM+TM+TM                                                | 657  | LOC105314661 | metazoa | Amphimedon queenslandica | [Amphimedon queenslandica] PREDICTED: uncharacterized protein LOC105314661 isoform X1 | GCF_000090795.1 | TRADDN-NCOA6 |
| XP_019858859.1 | Death+DED+TRADDN-NCOA6+TM+TM+TM+TM+TM+TM                                                | 656  | LOC105314661 | metazoa | Amphimedon queenslandica | [Amphimedon queenslandica] PREDICTED: uncharacterized protein LOC105314661 isoform X2 | GCF_000090795.1 | TRADDN-NCOA6 |
| XP_019859374.1 | Death+DED+TRADDN-NCOA6+UPA+CARD                                                         | 740  | LOC109587585 | metazoa | Amphimedon queenslandica | [Amphimedon queenslandica] PREDICTED: uncharacterized protein LOC109587585            | GCF_000090795.1 | TRADDN-NCOA6 |
| XP_019855315.1 | Death+DED+TRADDN-NCOA6+UPA+UPA+UPA+RRM+RRM+RRM+KH+KH+KH+KH+KH+KH+KH+KH+Macro+KH+KH+PARP | 2382 | LOC100631792 | metazoa | Amphimedon queenslandica | [Amphimedon queenslandica] PREDICTED: uncharacterized protein LOC100631792 isoform X1 | GCF_000090795.1 | TRADDN-NCOA6 |
| XP_019855316.1 | Death+DED+TRADDN-NCOA6+UPA+UPA+UPA+RRM+RRM+RRM+KH+KH+KH+KH+KH+KH+KH+KH+Macro+KH+KH+PARP | 2377 | LOC100631792 | metazoa | Amphimedon queenslandica | [Amphimedon queenslandica] PREDICTED: uncharacterized protein LOC100631792 isoform X2 | GCF_000090795.1 | TRADDN-NCOA6 |
| XP_019858095.1 | Death+DED+TRADDN-NCOA6+zf-TRAF+TM+TM+TM+TM+TM+TM                                        | 703  | LOC109586357 | metazoa | Amphimedon queenslandica | [Amphimedon queenslandica] PREDICTED: uncharacterized protein LOC109586357            | GCF_000090795.1 | TRADDN-NCOA6 |

| acc            | architecture                                    | len  | gen.name     | taxend  | species                  | define                                                                                | gca             | clade        |
|----------------|-------------------------------------------------|------|--------------|---------|--------------------------|---------------------------------------------------------------------------------------|-----------------|--------------|
| XP_019851433.1 | Death+TM+DED+TRADDN-NCOA6+Coiled-coil+MATH+MATH | 1040 | LOC109581612 | metazoa | Amphimedon queenslandica | PREDICTED: uncharacterized protein LOC109581612 isoform X1 [Amphimedon queenslandica] | GCF_000090795.1 | TRADDN-NCOA6 |
| XP_019862050.1 | Death+TM+TM+DED+TRADDN-NCOA6                    | 444  | LOC109590594 | metazoa | Amphimedon queenslandica | PREDICTED: uncharacterized protein LOC109590594 [Amphimedon queenslandica]            | GCF_000090795.1 | TRADDN-NCOA6 |
| XP_013395730.1 | Death+TRADDN-DEDD2+Coiled-coil                  | 468  | LOC106162845 | metazoa | Lingula anatina          | uncharacterized protein LOC106162845 [Lingula anatina]                                | GCF_001039355.2 | TRADDN-DEDD2 |
| XP_013413759.1 | Death+TRADDN-DEDD2+Coiled-coil                  | 590  | LOC106176083 | metazoa | Lingula anatina          | uncharacterized protein LOC106176083 [Lingula anatina]                                | GCF_001039355.2 | TRADDN-DEDD2 |
| XP_019859154.1 | Death+TRADDN-NCOA6+CASPASE                      | 618  | LOC109587358 | metazoa | Amphimedon queenslandica | PREDICTED: uncharacterized protein LOC109587358 [Amphimedon queenslandica]            | GCF_000090795.1 | TRADDN-NCOA6 |
| XP_019861377.1 | Death+TRADDN-NCOA6+Coiled-coil                  | 615  | LOC109589811 | metazoa | Amphimedon queenslandica | PREDICTED: myosin-14-like [Amphimedon queenslandica]                                  | GCF_000090795.1 | TRADDN-NCOA6 |
| XP_019860764.1 | Death+TRADDN-NCOA6+Coiled-coil+HD               | 954  | LOC109589081 | metazoa | Amphimedon queenslandica | PREDICTED: uncharacterized protein LOC109589081 [Amphimedon queenslandica]            | GCF_000090795.1 | TRADDN-NCOA6 |
| XP_019848917.1 | Death+TRADDN-NCOA6+Coiled-coil+LRRs             | 526  | LOC109580325 | metazoa | Amphimedon queenslandica | PREDICTED: uncharacterized protein LOC109580325 [Amphimedon queenslandica]            | GCF_000090795.1 | TRADDN-NCOA6 |
| XP_019850826.1 | Death+TRADDN-NCOA6+Coiled-coil+LRRs             | 581  | LOC100640283 | metazoa | Amphimedon queenslandica | PREDICTED: uncharacterized protein LOC100640283 [Amphimedon queenslandica]            | GCF_000090795.1 | TRADDN-NCOA6 |
| XP_019854437.1 | Death+TRADDN-NCOA6+Coiled-coil+LRRs             | 584  | LOC109583492 | metazoa | Amphimedon queenslandica | PREDICTED: uncharacterized protein LOC109583492 [Amphimedon queenslandica]            | GCF_000090795.1 | TRADDN-NCOA6 |
| XP_019856063.1 | Death+TRADDN-NCOA6+Coiled-coil+LRRs             | 558  | LOC109584685 | metazoa | Amphimedon queenslandica | PREDICTED: uncharacterized protein LOC109584685 [Amphimedon queenslandica]            | GCF_000090795.1 | TRADDN-NCOA6 |
| XP_019860892.1 | Death+TRADDN-NCOA6+Coiled-coil+SH2+SH2          | 670  | LOC109589223 | metazoa | Amphimedon queenslandica | PREDICTED: uncharacterized protein LOC109589223 [Amphimedon queenslandica]            | GCF_000090795.1 | TRADDN-NCOA6 |
| XP_019852132.1 | Death+TRADDN-NCOA6+Coiled-coil+SH3+LRRs         | 620  | LOC109582017 | metazoa | Amphimedon queenslandica | PREDICTED: uncharacterized protein LOC109582017 [Amphimedon queenslandica]            | GCF_000090795.1 | TRADDN-NCOA6 |
| XP_019858261.1 | Death+TRADDN-NCOA6+Coiled-coil+SH3+LRRs         | 522  | LOC109586506 | metazoa | Amphimedon queenslandica | PREDICTED: uncharacterized protein LOC109586506 [Amphimedon queenslandica]            | GCF_000090795.1 | TRADDN-NCOA6 |
| XP_019860598.1 | Death+TRADDN-NCOA6+Coiled-coil+SH3+LRRs         | 558  | LOC109588939 | metazoa | Amphimedon queenslandica | PREDICTED: uncharacterized protein LOC109588939, partial [Amphimedon queenslandica]   | GCF_000090795.1 | TRADDN-NCOA6 |
| XP_019860600.1 | Death+TRADDN-NCOA6+Coiled-coil+SH3+LRRs         | 731  | LOC109588940 | metazoa | Amphimedon queenslandica | PREDICTED: uncharacterized protein LOC109588940 isoform X1 [Amphimedon queenslandica] | GCF_000090795.1 | TRADDN-NCOA6 |
| XP_019860601.1 | Death+TRADDN-NCOA6+Coiled-coil+SH3+LRRs         | 726  | LOC109588940 | metazoa | Amphimedon queenslandica | PREDICTED: uncharacterized protein LOC109588940 isoform X2 [Amphimedon queenslandica] | GCF_000090795.1 | TRADDN-NCOA6 |
| XP_019860602.1 | Death+TRADDN-NCOA6+Coiled-coil+SH3+LRRs         | 711  | LOC109588940 | metazoa | Amphimedon queenslandica | PREDICTED: uncharacterized protein LOC109588940 isoform X3 [Amphimedon queenslandica] | GCF_000090795.1 | TRADDN-NCOA6 |

| acc            | architecture                                   | len  | gen.name           | taxend  | species                     | define                                                                             | gca             | clade        |
|----------------|------------------------------------------------|------|--------------------|---------|-----------------------------|------------------------------------------------------------------------------------|-----------------|--------------|
| XP_019860671.1 | Death+TRADDN-NCOA6+Coiled-coil+SH3+LRRs        | 582  | LOC109588993       | metazoa | Amphimedon queenslandica    | PREDICTED: uncharacterized protein LOC109588993 [Amphimedon queenslandica]         | GCF_000090795.1 | TRADDN-NCOA6 |
| XP_019861128.1 | Death+TRADDN-NCOA6+Coiled-coil+SH3+LRRs        | 616  | LOC109589495       | metazoa | Amphimedon queenslandica    | PREDICTED: uncharacterized protein LOC109589495 [Amphimedon queenslandica]         | GCF_000090795.1 | TRADDN-NCOA6 |
| XP_019861670.1 | Death+TRADDN-NCOA6+Coiled-coil+SH3+LRRs        | 662  | LOC109590192       | metazoa | Amphimedon queenslandica    | PREDICTED: uncharacterized protein LOC109590192 [Amphimedon queenslandica]         | GCF_000090795.1 | TRADDN-NCOA6 |
| XP_019859113.1 | Death+TRADDN-NCOA6+HSP90-Sacsin+HSP90-Sacsin   | 1275 | LOC109587308       | metazoa | Amphimedon queenslandica    | PREDICTED: sacin-like, partial [Amphimedon queenslandica]                          | GCF_000090795.1 | TRADDN-NCOA6 |
| XP_019863545.1 | Death+TRADDN-NCOA6+PDZ+KELCH                   | 757  | LOC109592557       | metazoa | Amphimedon queenslandica    | PREDICTED: uncharacterized protein LOC109592557 [Amphimedon queenslandica]         | GCF_000090795.1 | TRADDN-NCOA6 |
| XP_019854545.1 | DED+DED+DED+TRADDN-NCOA6+PNPase                | 809  | LOC109583571       | metazoa | Amphimedon queenslandica    | PREDICTED: uncharacterized protein LOC109583571 [Amphimedon queenslandica]         | GCF_000090795.1 | TRADDN-NCOA6 |
| XP_019859896.1 | DED+DED+DED+TRADDN-NCOA6+PNPase                | 815  | LOC109588155       | metazoa | Amphimedon queenslandica    | PREDICTED: uncharacterized protein LOC109588155 [Amphimedon queenslandica]         | GCF_000090795.1 | TRADDN-NCOA6 |
| RJW68759.1     | DED+low-complexity+TRADDN-DEDD2+low-complexity | 775  | Dedd               | metazoa | Clonorchis sinensis         | Death effector domain-containing protein [Clonorchis sinensis]                     | GCA_003604175.1 | TRADDN-DEDD2 |
| CDS15143.1     | DED+low-complexity+TRADDN-DEDD2+low-complexity | 654  | EgrG_000754700     | metazoa | Echinococcus granulosus     | DNA binding death effector domain containing protein [Echinococcus granulosus]     | -               | TRADDN-DEDD2 |
| XP_024352569.1 | DED+low-complexity+TRADDN-DEDD2+low-complexity | 681  | EGR_03859          | metazoa | Echinococcus granulosus     | DNA-binding death effector domain-containing protein [Echinococcus granulosus]     | GCF_000524195.1 | TRADDN-DEDD2 |
| CDS39986.1     | DED+low-complexity+TRADDN-DEDD2+low-complexity | 654  | EmuJ_000754700     | metazoa | Echinococcus multilocularis | DNA binding death effector domain containing protein [Echinococcus multilocularis] | GCA_000469725.3 | TRADDN-DEDD2 |
| CDS28814.1     | DED+low-complexity+TRADDN-DEDD2+low-complexity | 630  | HmN_000830400      | metazoa | Hymenolepis microstoma      | DNA binding death effector domain containing protein [Hymenolepis microstoma]      | GCA_000469805.2 | TRADDN-DEDD2 |
| XP_009176246.1 | DED+low-complexity+TRADDN-DEDD2+low-complexity | 793  | T265_11351         | metazoa | Opisthorchis viverrini      | hypothetical protein T265_11351 [Opisthorchis viverrini]                           | GCF_000715545.1 | TRADDN-DEDD2 |
| XP_013411363.1 | DED+TRADDN-DEDD2                               | 314  | LOC106174367       | metazoa | Lingula anatina             | uncharacterized protein LOC106174367 [Lingula anatina]                             | GCF_001039355.2 | TRADDN-DEDD2 |
| PAA59450.1     | DED+TRADDN-DEDD2                               | 458  | BOX15_Mlig006619g1 | metazoa | Macrostomum lignano         | hypothetical protein BOX15_Mlig006619g1 [Macrostomum lignano]                      | GCA_002269645.1 | TRADDN-DEDD2 |
| XP_018652160.1 | DED+TRADDN-DEDD2                               | 682  | Smp_169670.1       | metazoa | Schistosoma mansoni         | hypothetical protein Smp_169670.1 [Schistosoma mansoni]                            | GCF_000237925.1 | TRADDN-DEDD2 |
| XP_023932635.1 | DED+TRADDN-DEDD2+Death+Coiled-coil+SUFU+SUFU_C | 1311 | LOC106174700       | metazoa | Lingula anatina             | uncharacterized protein LOC106174700 [Lingula anatina]                             | GCF_001039355.2 | TRADDN-DEDD2 |
| XP_013414794.1 | DED+TRADDN-DEDD2+HEPN                          | 539  | LOC106176808       | metazoa | Lingula anatina             | uncharacterized protein LOC106176808 [Lingula anatina]                             | GCF_001039355.2 | TRADDN-DEDD2 |
| XP_019853509.1 | DED+TRADDN-NCOA6                               | 324  | LOC109582892       | metazoa | Amphimedon queenslandica    | PREDICTED: uncharacterized protein LOC109582892 [Amphimedon queenslandica]         | GCF_000090795.1 | TRADDN-NCOA6 |

| acc            | architecture     | len | gen.name     | taxend  | species                  | define                                                                              | gca             | clade        |
|----------------|------------------|-----|--------------|---------|--------------------------|-------------------------------------------------------------------------------------|-----------------|--------------|
| XP_019853796.1 | DED+TRADDN-NCOA6 | 234 | LOC109583065 | metazoa | Amphimedon queenslandica | PREDICTED: uncharacterized protein LOC109583065                                     | GCF_000090795.1 | TRADDN-NCOA6 |
| XP_019856848.1 | DED+TRADDN-NCOA6 | 572 | LOC109585287 | metazoa | Amphimedon queenslandica | [Amphimedon queenslandica] PREDICTED: uncharacterized protein LOC109585287          | GCF_000090795.1 | TRADDN-NCOA6 |
| XP_019857234.1 | DED+TRADDN-NCOA6 | 378 | LOC105314236 | metazoa | Amphimedon queenslandica | [Amphimedon queenslandica] PREDICTED: uncharacterized protein LOC105314236          | GCF_000090795.1 | TRADDN-NCOA6 |
| XP_019859169.1 | DED+TRADDN-NCOA6 | 260 | LOC109587370 | metazoa | Amphimedon queenslandica | [Amphimedon queenslandica] PREDICTED: uncharacterized protein LOC109587370          | GCF_000090795.1 | TRADDN-NCOA6 |
| XP_019860177.1 | DED+TRADDN-NCOA6 | 324 | LOC109588444 | metazoa | Amphimedon queenslandica | [Amphimedon queenslandica] PREDICTED: uncharacterized protein LOC109588444          | GCF_000090795.1 | TRADDN-NCOA6 |
| XP_019860545.1 | DED+TRADDN-NCOA6 | 295 | LOC109588878 | metazoa | Amphimedon queenslandica | [Amphimedon queenslandica] PREDICTED: uncharacterized protein LOC109588878          | GCF_000090795.1 | TRADDN-NCOA6 |
| XP_019861949.1 | DED+TRADDN-NCOA6 | 219 | LOC109590475 | metazoa | Amphimedon queenslandica | [Amphimedon queenslandica] PREDICTED: uncharacterized protein LOC109590475          | GCF_000090795.1 | TRADDN-NCOA6 |
| XP_019862149.1 | DED+TRADDN-NCOA6 | 329 | LOC109590706 | metazoa | Amphimedon queenslandica | [Amphimedon queenslandica] PREDICTED: uncharacterized protein LOC109590706, partial | GCF_000090795.1 | TRADDN-NCOA6 |
| XP_019862203.1 | DED+TRADDN-NCOA6 | 248 | LOC109590774 | metazoa | Amphimedon queenslandica | [Amphimedon queenslandica] PREDICTED: uncharacterized protein LOC109590774          | GCF_000090795.1 | TRADDN-NCOA6 |
| XP_019862479.1 | DED+TRADDN-NCOA6 | 370 | LOC109591126 | metazoa | Amphimedon queenslandica | [Amphimedon queenslandica] PREDICTED: uncharacterized protein LOC109591126          | GCF_000090795.1 | TRADDN-NCOA6 |
| XP_019863047.1 | DED+TRADDN-NCOA6 | 211 | LOC109591881 | metazoa | Amphimedon queenslandica | [Amphimedon queenslandica] PREDICTED: uncharacterized protein LOC109591881          | GCF_000090795.1 | TRADDN-NCOA6 |
| XP_019863194.1 | DED+TRADDN-NCOA6 | 258 | LOC109592070 | metazoa | Amphimedon queenslandica | [Amphimedon queenslandica] PREDICTED: uncharacterized protein LOC109592070, partial | GCF_000090795.1 | TRADDN-NCOA6 |
| XP_019863290.1 | DED+TRADDN-NCOA6 | 246 | LOC109592220 | metazoa | Amphimedon queenslandica | [Amphimedon queenslandica] PREDICTED: uncharacterized protein LOC109592220          | GCF_000090795.1 | TRADDN-NCOA6 |
| XP_019863533.1 | DED+TRADDN-NCOA6 | 285 | LOC109592548 | metazoa | Amphimedon queenslandica | [Amphimedon queenslandica] PREDICTED: uncharacterized protein LOC109592548, partial | GCF_000090795.1 | TRADDN-NCOA6 |
| XP_019863571.1 | DED+TRADDN-NCOA6 | 230 | LOC109592599 | metazoa | Amphimedon queenslandica | [Amphimedon queenslandica] PREDICTED: uncharacterized protein LOC109592599, partial | GCF_000090795.1 | TRADDN-NCOA6 |
| XP_019863629.1 | DED+TRADDN-NCOA6 | 231 | LOC105316165 | metazoa | Amphimedon queenslandica | [Amphimedon queenslandica] PREDICTED: uncharacterized protein LOC105316165          | GCF_000090795.1 | TRADDN-NCOA6 |
| XP_019864031.1 | DED+TRADDN-NCOA6 | 281 | LOC109593366 | metazoa | Amphimedon queenslandica | [Amphimedon queenslandica] PREDICTED: uncharacterized protein LOC109593366, partial | GCF_000090795.1 | TRADDN-NCOA6 |

| acc            | architecture                                | len  | gen.name     | taxend  | species                  | define                                                                                                                                           | gca             | clade        |
|----------------|---------------------------------------------|------|--------------|---------|--------------------------|--------------------------------------------------------------------------------------------------------------------------------------------------|-----------------|--------------|
| XP_011407589.1 | DED+TRADDN-NCOA6+Ankyrin                    | 379  | LOC100639125 | metazoa | Amphimedon queenslandica | PREDICTED: uncharacterized protein LOC100639125                                                                                                  | GCF_000090795.1 | TRADDN-NCOA6 |
| XP_011409020.1 | DED+TRADDN-NCOA6+Ankyrin                    | 361  | LOC105315940 | metazoa | Amphimedon queenslandica | [Amphimedon queenslandica] PREDICTED: uncharacterized protein LOC105315940                                                                       | GCF_000090795.1 | TRADDN-NCOA6 |
| XP_011409201.1 | DED+TRADDN-NCOA6+Ankyrin                    | 481  | LOC105316094 | metazoa | Amphimedon queenslandica | [Amphimedon queenslandica] PREDICTED: ankyrin-1-like, partial [Amphimedon queenslandica]                                                         | GCF_000090795.1 | TRADDN-NCOA6 |
| XP_011410102.1 | DED+TRADDN-NCOA6+Ankyrin                    | 1078 | LOC105316704 | metazoa | Amphimedon queenslandica | PREDICTED: uncharacterized protein LOC105316704                                                                                                  | GCF_000090795.1 | TRADDN-NCOA6 |
| XP_019851849.1 | DED+TRADDN-NCOA6+Ankyrin                    | 511  | LOC109581842 | metazoa | Amphimedon queenslandica | [Amphimedon queenslandica] PREDICTED: ankyrin repeat domain-containing protein 29-like                                                           | GCF_000090795.1 | TRADDN-NCOA6 |
| XP_019854767.1 | DED+TRADDN-NCOA6+Ankyrin                    | 799  | LOC109583761 | metazoa | Amphimedon queenslandica | PREDICTED: ankyrin-2-like [Amphimedon queenslandica]                                                                                             | GCF_000090795.1 | TRADDN-NCOA6 |
| XP_019859676.1 | DED+TRADDN-NCOA6+Ankyrin                    | 275  | LOC109587894 | metazoa | Amphimedon queenslandica | PREDICTED: uncharacterized protein LOC109587894                                                                                                  | GCF_000090795.1 | TRADDN-NCOA6 |
| XP_019859682.1 | DED+TRADDN-NCOA6+Ankyrin                    | 525  | LOC109587903 | metazoa | Amphimedon queenslandica | [Amphimedon queenslandica] PREDICTED: serine/threonine-protein phosphatase 6 regulatory ankyrin repeat subunit A-like [Amphimedon queenslandica] | GCF_000090795.1 | TRADDN-NCOA6 |
| XP_019862955.1 | DED+TRADDN-NCOA6+Ankyrin                    | 355  | LOC109591735 | metazoa | Amphimedon queenslandica | PREDICTED: uncharacterized protein LOC109591735                                                                                                  | GCF_000090795.1 | TRADDN-NCOA6 |
| XP_019863772.1 | DED+TRADDN-NCOA6+Ankyrin                    | 371  | LOC109592895 | metazoa | Amphimedon queenslandica | [Amphimedon queenslandica] PREDICTED: uncharacterized protein LOC109592895, partial                                                              | GCF_000090795.1 | TRADDN-NCOA6 |
| XP_019861208.1 | DED+TRADDN-NCOA6+Ankyrin+APGTPase+COR+Death | 1184 | LOC109589593 | metazoa | Amphimedon queenslandica | [Amphimedon queenslandica] PREDICTED: uncharacterized protein LOC109589593                                                                       | GCF_000090795.1 | TRADDN-NCOA6 |
| XP_019849449.1 | DED+TRADDN-NCOA6+Ankyrin+HSP70              | 1281 | LOC109580573 | metazoa | Amphimedon queenslandica | PREDICTED: uncharacterized protein LOC109580573                                                                                                  | GCF_000090795.1 | TRADDN-NCOA6 |
| XP_019857397.1 | DED+TRADDN-NCOA6+Ankyrin+LRRs               | 655  | LOC109585711 | metazoa | Amphimedon queenslandica | [Amphimedon queenslandica] PREDICTED: uncharacterized protein LOC109585711                                                                       | GCF_000090795.1 | TRADDN-NCOA6 |
| XP_019860269.1 | DED+TRADDN-NCOA6+Ankyrin+LRRs               | 555  | LOC109588565 | metazoa | Amphimedon queenslandica | [Amphimedon queenslandica] PREDICTED: uncharacterized protein LOC109588565                                                                       | GCF_000090795.1 | TRADDN-NCOA6 |
| XP_019864332.1 | DED+TRADDN-NCOA6+Ankyrin+Ras+wHTH+wHTH+COR  | 1100 | LOC109593741 | metazoa | Amphimedon queenslandica | [Amphimedon queenslandica] PREDICTED: uncharacterized protein LOC109593741 isoform X2                                                            | GCF_000090795.1 | TRADDN-NCOA6 |
| XP_019856065.1 | DED+TRADDN-NCOA6+Coiled-coil                | 293  | LOC109584687 | metazoa | Amphimedon queenslandica | [Amphimedon queenslandica] PREDICTED: uncharacterized protein LOC109584687                                                                       | GCF_000090795.1 | TRADDN-NCOA6 |
| XP_019858669.1 | DED+TRADDN-NCOA6+Coiled-coil                | 391  | LOC109586882 | metazoa | Amphimedon queenslandica | [Amphimedon queenslandica] PREDICTED: uncharacterized protein LOC109586882                                                                       | GCF_000090795.1 | TRADDN-NCOA6 |

| acc            | architecture                                     | len | gen.name     | taxend  | species                  | define                                                                                   | gca             | clade        |
|----------------|--------------------------------------------------|-----|--------------|---------|--------------------------|------------------------------------------------------------------------------------------|-----------------|--------------|
| XP_019859555.1 | DED+TRADDN-NCOA6+Coiled-coil                     | 302 | LOC109587776 | metazoa | Amphimedon queenslandica | PREDICTED: uncharacterized protein LOC109587776                                          | GCF_000090795.1 | TRADDN-NCOA6 |
| XP_019861077.1 | DED+TRADDN-NCOA6+Coiled-coil                     | 301 | LOC109589427 | metazoa | Amphimedon queenslandica | [Amphimedon queenslandica] PREDICTED: uncharacterized protein LOC109589427               | GCF_000090795.1 | TRADDN-NCOA6 |
| XP_019862666.1 | DED+TRADDN-NCOA6+Coiled-coil                     | 346 | LOC109591361 | metazoa | Amphimedon queenslandica | [Amphimedon queenslandica] PREDICTED: uncharacterized protein LOC109591361               | GCF_000090795.1 | TRADDN-NCOA6 |
| XP_019863296.1 | DED+TRADDN-NCOA6+Coiled-coil                     | 414 | LOC109592229 | metazoa | Amphimedon queenslandica | [Amphimedon queenslandica] PREDICTED: uncharacterized protein LOC109592229, partial      | GCF_000090795.1 | TRADDN-NCOA6 |
| XP_019861674.1 | DED+TRADDN-NCOA6+Coiled-coil+Death+CARD          | 671 | LOC109590195 | metazoa | Amphimedon queenslandica | [Amphimedon queenslandica] PREDICTED: uncharacterized protein LOC109590195 isoform X2    | GCF_000090795.1 | TRADDN-NCOA6 |
| XP_019861673.1 | DED+TRADDN-NCOA6+Coiled-coil+Death+CARD+DED      | 792 | LOC109590195 | metazoa | Amphimedon queenslandica | [Amphimedon queenslandica] PREDICTED: uncharacterized protein LOC109590195 isoform X1    | GCF_000090795.1 | TRADDN-NCOA6 |
| XP_019860830.1 | DED+TRADDN-NCOA6+Coiled-coil+HD                  | 826 | LOC109589155 | metazoa | Amphimedon queenslandica | [Amphimedon queenslandica] PREDICTED: uncharacterized protein LOC109589155               | GCF_000090795.1 | TRADDN-NCOA6 |
| XP_019860219.1 | DED+TRADDN-NCOA6+Coiled-coil+MATH+MATH           | 822 | LOC109588500 | metazoa | Amphimedon queenslandica | PREDICTED: polyamine-modulated factor 1-binding protein 1-like                           | GCF_000090795.1 | TRADDN-NCOA6 |
| XP_019856595.1 | DED+TRADDN-NCOA6+Coiled-coil+SH3+Beta-propeller  | 832 | LOC109585094 | metazoa | Amphimedon queenslandica | [Amphimedon queenslandica] PREDICTED: E3 ubiquitin-protein ligase TRIM71-like isoform X1 | GCF_000090795.1 | TRADDN-NCOA6 |
| XP_019856596.1 | DED+TRADDN-NCOA6+Coiled-coil+SH3+Beta-propeller  | 831 | LOC109585094 | metazoa | Amphimedon queenslandica | [Amphimedon queenslandica] PREDICTED: E3 ubiquitin-protein ligase TRIM71-like isoform X2 | GCF_000090795.1 | TRADDN-NCOA6 |
| XP_019856597.1 | DED+TRADDN-NCOA6+Coiled-coil+SH3+Beta-propeller  | 812 | LOC109585094 | metazoa | Amphimedon queenslandica | [Amphimedon queenslandica] PREDICTED: E3 ubiquitin-protein ligase TRIM71-like isoform X3 | GCF_000090795.1 | TRADDN-NCOA6 |
| XP_019852391.1 | DED+TRADDN-NCOA6+Coiled-coil+SH3+SH3+SH2+Pkinase | 889 | LOC100637712 | metazoa | Amphimedon queenslandica | [Amphimedon queenslandica] PREDICTED: uncharacterized protein LOC100637712               | GCF_000090795.1 | TRADDN-NCOA6 |
| XP_019852393.1 | DED+TRADDN-NCOA6+Coiled-coil+SH3+SH3+SH2+Pkinase | 988 | LOC100637961 | metazoa | Amphimedon queenslandica | [Amphimedon queenslandica] PREDICTED: uncharacterized protein LOC100637961               | GCF_000090795.1 | TRADDN-NCOA6 |
| XP_019859739.1 | DED+TRADDN-NCOA6+Coiled-coil+SH3+SH3+SH2+Pkinase | 955 | LOC109587969 | metazoa | Amphimedon queenslandica | [Amphimedon queenslandica] PREDICTED: uncharacterized protein LOC109587969               | GCF_000090795.1 | TRADDN-NCOA6 |
| XP_019862004.1 | DED+TRADDN-NCOA6+Coiled-coil+SH3+SH3+SH2+Pkinase | 834 | LOC100638702 | metazoa | Amphimedon queenslandica | [Amphimedon queenslandica] PREDICTED: tyrosine-protein kinase STK-like                   | GCF_000090795.1 | TRADDN-NCOA6 |
| XP_019857552.1 | DED+TRADDN-NCOA6+Coiled-coil+TM+TM               | 652 | LOC109585850 | metazoa | Amphimedon queenslandica | [Amphimedon queenslandica] PREDICTED: uncharacterized protein LOC109585850               | GCF_000090795.1 | TRADDN-NCOA6 |
| XP_019857558.1 | DED+TRADDN-NCOA6+Coiled-coil+TM+TM               | 632 | LOC109585853 | metazoa | Amphimedon queenslandica | [Amphimedon queenslandica] PREDICTED: uncharacterized protein LOC109585853               | GCF_000090795.1 | TRADDN-NCOA6 |

| acc            | architecture                                                                      | len  | gen.name     | taxend  | species                   | define                                                                                | gca             | clade                 |
|----------------|-----------------------------------------------------------------------------------|------|--------------|---------|---------------------------|---------------------------------------------------------------------------------------|-----------------|-----------------------|
| XP_019862678.1 | DED+TRADDN-NCOA6+SH3                                                              | 512  | LOC109591376 | metazoa | Amphimedon queenslandica  | PREDICTED: uncharacterized protein LOC109591376, partial [Amphimedon queenslandica]   | GCF_000090795.1 | TRADDN-NCOA6          |
| XP_019854924.1 | DED+TRADDN-NCOA6+SH3+LRRs                                                         | 555  | LOC109583863 | metazoa | Amphimedon queenslandica  | PREDICTED: uncharacterized protein LOC109583863 [Amphimedon queenslandica]            | GCF_000090795.1 | TRADDN-NCOA6          |
| XP_011408461.2 | DED+TRADDN-NCOA6+UPA+CARD                                                         | 475  | LOC105315485 | metazoa | Amphimedon queenslandica  | PREDICTED: uncharacterized protein LOC105315485, partial [Amphimedon queenslandica]   | GCF_000090795.1 | TRADDN-NCOA6          |
| XP_019855800.1 | DED+TRADDN-NCOA6+UPA+Death+Coiled-coil+Death+UPA+CARD                             | 1316 | LOC100638991 | metazoa | Amphimedon queenslandica  | PREDICTED: uncharacterized protein LOC100638991, partial [Amphimedon queenslandica]   | GCF_000090795.1 | TRADDN-NCOA6          |
| XP_011405642.2 | DED+TRADDN-NCOA6+UPA+UPA+UPA+RRM+RRM+RRM+KH+KH+KH+KH+KH+KH+KH+KH+Macro+KH+KH+PARP | 2244 | LOC100631792 | metazoa | Amphimedon queenslandica  | PREDICTED: uncharacterized protein LOC100631792 isoform X3 [Amphimedon queenslandica] | GCF_000090795.1 | TRADDN-NCOA6          |
| XP_019855317.1 | DED+TRADDN-NCOA6+UPA+UPA+UPA+RRM+RRM+RRM+KH+KH+KH+KH+KH+KH+KH+KH+Macro+KH+KH+PARP | 2244 | LOC100631792 | metazoa | Amphimedon queenslandica  | PREDICTED: uncharacterized protein LOC100631792 isoform X3 [Amphimedon queenslandica] | GCF_000090795.1 | TRADDN-NCOA6          |
| XP_013416013.1 | HEPN+Ankyrin+TRADDN-DEDD2+SF2-helicase                                            | 1078 | LOC106177707 | metazoa | Lingula anatina           | uncharacterized protein LOC106177707 isoform X1 [Lingula anatina]                     | GCF_001039355.2 | TRADDN-DEDD2          |
| XP_013416018.1 | HEPN+Ankyrin+TRADDN-DEDD2+SF2-helicase                                            | 1070 | LOC106177707 | metazoa | Lingula anatina           | uncharacterized protein LOC106177707 isoform X2 [Lingula anatina]                     | GCF_001039355.2 | TRADDN-DEDD2          |
| XP_013399072.1 | HEPN+Coiled-coil+TRADDN-DEDD2+GTPase-AIG                                          | 1112 | LOC106165415 | metazoa | Lingula anatina           | uncharacterized protein LOC106165415 [Lingula anatina]                                | GCF_001039355.2 | TRADDN-DEDD2          |
| XP_013399073.1 | HEPN+Coiled-coil+TRADDN-DEDD2+RNA-receptor_SF2-helicase+RIG-I_C-RD                | 1529 | LOC106165417 | metazoa | Lingula anatina           | uncharacterized protein LOC106165417 [Lingula anatina]                                | GCF_001039355.2 | TRADDN-DEDD2          |
| XP_023230968.1 | low-complexity+DED+TRADDN-DEDD2                                                   | 303  | LOC111631013 | metazoa | Centruroides sculpturatus | death effector domain-containing protein-like isoform X1 [Centruroides sculpturatus]  | GCF_000671375.1 | TRADDN-DEDD2          |
| XP_013782170.1 | low-complexity+DED+TRADDN-DEDD2                                                   | 325  | LOC106466432 | metazoa | Limulus polyphemus        | death effector domain-containing protein-like [Limulus polyphemus]                    | GCF_000517525.1 | TRADDN-DEDD2          |
| XP_013782555.1 | low-complexity+DED+TRADDN-DEDD2                                                   | 324  | LOC106466800 | metazoa | Limulus polyphemus        | death effector domain-containing protein-like [Limulus polyphemus]                    | GCF_000517525.1 | TRADDN-DEDD2          |
| XP_013785157.1 | low-complexity+DED+TRADDN-DEDD2                                                   | 322  | LOC106469233 | metazoa | Limulus polyphemus        | death effector domain-containing protein-like [Limulus polyphemus]                    | GCF_000517525.1 | TRADDN-DEDD2          |
| XP_013414953.1 | low-complexity+DED+TRADDN-DEDD2                                                   | 341  | LOC106176911 | metazoa | Lingula anatina           | death effector domain-containing protein [Lingula anatina]                            | GCF_001039355.2 | TRADDN-DEDD2          |
| XP_015919266.1 | low-complexity+DED+TRADDN-DEDD2                                                   | 324  | LOC107448539 | metazoa | Parasteatoda tepidariorum | death effector domain-containing protein [Parasteatoda tepidariorum]                  | GCF_000365465.2 | TRADDN-DEDD2          |
| KFM80261.1     | low-complexity+DED+TRADDN-DEDD2                                                   | 326  | X975_03323   | metazoa | Stegodyphus mimosarum     | Death effector domain-containing protein, partial [Stegodyphus mimosarum]             | GCA_000611955.2 | TRADDN-DEDD2          |
| XP_013390221.1 | N-ter+TRADDN-Bac                                                                  | 130  | LOC106158693 | metazoa | Lingula anatina           | PREDICTED: uncharacterized protein LOC106158693 [Lingula anatina]                     | -               | TRADDN-Bacterial-like |
| XP_013391308.1 | N-ter+TRADDN-Bac+FAM124                                                           | 405  | LOC106159546 | metazoa | Lingula anatina           | uncharacterized protein LOC106159546 [Lingula anatina]                                | GCF_001039355.2 | TRADDN-Bacterial-like |
| XP_019862936.1 | PNPase+DED+TRADDN-NCOA6                                                           | 550  | LOC109591708 | metazoa | Amphimedon queenslandica  | PREDICTED: uncharacterized protein LOC109591708, partial [Amphimedon queenslandica]   | GCF_000090795.1 | TRADDN-NCOA6          |

| acc            | architecture                                                               | len  | gen.name     | taxend  | species                  | define                                                                                       | gca             | clade        |
|----------------|----------------------------------------------------------------------------|------|--------------|---------|--------------------------|----------------------------------------------------------------------------------------------|-----------------|--------------|
| XP_019851861.1 | TM+CARD+CARD+DED+TRADDN-NCOA6+Ankyrin                                      | 1649 | LOC100639136 | metazoa | Amphimedon queenslandica | PREDICTED: uncharacterized protein LOC100639136                                              | GCF_000090795.1 | TRADDN-NCOA6 |
| XP_019854237.1 | TM+CARD+CARD+TRADDN-NCOA6+Ankyrin                                          | 2115 | LOC100635111 | metazoa | Amphimedon queenslandica | [Amphimedon queenslandica] PREDICTED: uncharacterized protein LOC100635111                   | GCF_000090795.1 | TRADDN-NCOA6 |
| XP_011403406.2 | TM+CARD+DED+TRADDN-NCOA6+Ankyrin                                           | 1822 | LOC105312446 | metazoa | Amphimedon queenslandica | [Amphimedon queenslandica] PREDICTED: uncharacterized protein LOC105312446                   | GCF_000090795.1 | TRADDN-NCOA6 |
| XP_019859923.1 | TM+CARD+DED+TRADDN-NCOA6+Ankyrin                                           | 1026 | LOC109588182 | metazoa | Amphimedon queenslandica | [Amphimedon queenslandica] PREDICTED: uncharacterized protein LOC109588182                   | GCF_000090795.1 | TRADDN-NCOA6 |
| XP_019861853.1 | TM+CARD+DED+TRADDN-NCOA6+Ankyrin                                           | 1624 | LOC100640644 | metazoa | Amphimedon queenslandica | [Amphimedon queenslandica] PREDICTED: uncharacterized protein LOC100640644, partial          | GCF_000090795.1 | TRADDN-NCOA6 |
| XP_011408342.2 | TM+Death+CARD+DED+TRADDN-NCOA6+Ankyrin                                     | 676  | LOC100639549 | metazoa | Amphimedon queenslandica | [Amphimedon queenslandica] PREDICTED: uncharacterized protein LOC100639549, partial          | GCF_000090795.1 | TRADDN-NCOA6 |
| XP_019850302.1 | TM+Death+CARD+DED+TRADDN-NCOA6+Ankyrin                                     | 1134 | LOC109581026 | metazoa | Amphimedon queenslandica | [Amphimedon queenslandica] PREDICTED: uncharacterized protein LOC109581026                   | GCF_000090795.1 | TRADDN-NCOA6 |
| XP_019856195.1 | TM+Death+CARD+DED+TRADDN-NCOA6+Ankyrin                                     | 1369 | LOC100641054 | metazoa | Amphimedon queenslandica | [Amphimedon queenslandica] PREDICTED: ankyrin repeat and KH domain-containing protein 1-like | GCF_000090795.1 | TRADDN-NCOA6 |
| XP_019857996.1 | TM+Death+CARD+DED+TRADDN-NCOA6+Ankyrin                                     | 550  | LOC109586265 | metazoa | Amphimedon queenslandica | [Amphimedon queenslandica] PREDICTED: uncharacterized protein LOC109586265                   | GCF_000090795.1 | TRADDN-NCOA6 |
| XP_019859824.1 | TM+Death+CARD+DED+TRADDN-NCOA6+Ankyrin                                     | 556  | LOC109588077 | metazoa | Amphimedon queenslandica | [Amphimedon queenslandica] PREDICTED: uncharacterized protein LOC109588077, partial          | GCF_000090795.1 | TRADDN-NCOA6 |
| XP_019861870.1 | TM+Death+CARD+DED+TRADDN-NCOA6+Ankyrin                                     | 648  | LOC109590384 | metazoa | Amphimedon queenslandica | [Amphimedon queenslandica] PREDICTED: uncharacterized protein LOC109590384, partial          | GCF_000090795.1 | TRADDN-NCOA6 |
| XP_019860025.1 | TM+Death+CARD+DED+TRADDN-NCOA6+Ankyrin+Death+CARD+DED+TRADDN-NCOA6+Ankyrin | 2373 | LOC105314953 | metazoa | Amphimedon queenslandica | [Amphimedon queenslandica] PREDICTED: uncharacterized protein LOC105314953                   | GCF_000090795.1 | TRADDN-NCOA6 |
| XP_019860782.1 | TM+Death+DED+TRADDN-NCOA6+Ankyrin                                          | 609  | LOC109589105 | metazoa | Amphimedon queenslandica | [Amphimedon queenslandica] PREDICTED: uncharacterized protein LOC109589105                   | GCF_000090795.1 | TRADDN-NCOA6 |
| XP_019852427.1 | TM+Death+DED+TRADDN-NCOA6+Ankyrin+Coiled-coil                              | 1201 | LOC109582217 | metazoa | Amphimedon queenslandica | [Amphimedon queenslandica] PREDICTED: uncharacterized protein LOC109582217                   | GCF_000090795.1 | TRADDN-NCOA6 |
| XP_019852657.1 | TM+TM+Death+CARD+DED+TRADDN-NCOA6                                          | 885  | LOC109582413 | metazoa | Amphimedon queenslandica | [Amphimedon queenslandica] PREDICTED: uncharacterized protein LOC109582413                   | GCF_000090795.1 | TRADDN-NCOA6 |
| XP_019852670.1 | TM+TM+Death+CARD+DED+TRADDN-NCOA6                                          | 638  | LOC109582420 | metazoa | Amphimedon queenslandica | [Amphimedon queenslandica] PREDICTED: uncharacterized protein LOC109582420 isoform X1        | GCF_000090795.1 | TRADDN-NCOA6 |
| XP_019850895.1 | TM+TM+Death+DED+TRADDN-NCOA6+Ankyrin                                       | 897  | LOC105312422 | metazoa | Amphimedon queenslandica | [Amphimedon queenslandica] PREDICTED: uncharacterized protein LOC105312422 isoform X1        | GCF_000090795.1 | TRADDN-NCOA6 |



| acc            | architecture                         | len  | gen.name           | taxend  | species                   | define                                                                                | gca             | clade        |
|----------------|--------------------------------------|------|--------------------|---------|---------------------------|---------------------------------------------------------------------------------------|-----------------|--------------|
| XP_019850896.1 | TM+TM+Death+DED+TRADDN-NCOA6+Ankyrin | 882  | LOC105312422       | metazoa | Amphimedon queenslandica  | PREDICTED: uncharacterized protein LOC105312422 isoform X2 [Amphimedon queenslandica] | GCF_000090795.1 | TRADDN-NCOA6 |
| XP_019854303.1 | TM+TM+Death+DED+TRADDN-NCOA6+Ankyrin | 974  | LOC109583413       | metazoa | Amphimedon queenslandica  | PREDICTED: uncharacterized protein LOC109583413 [Amphimedon queenslandica]            | GCF_000090795.1 | TRADDN-NCOA6 |
| XP_023230971.1 | TRADDN-DEDD2                         | 249  | LOC111631013       | metazoa | Centruroides sculpturatus | death effector domain-containing protein-like isoform X3 [Centruroides sculpturatus]  | GCF_000671375.1 | TRADDN-DEDD2 |
| PIS85829.1     | TRADDN-DEDD2                         | 200  | D915_06944         | metazoa | Fasciola hepatica         | hypothetical protein D915_06944 [Fasciola hepatica]                                   | -               | TRADDN-DEDD2 |
| XP_013380659.1 | TRADDN-DEDD2                         | 393  | LOC106151793       | metazoa | Lingula anatina           | uncharacterized protein LOC106151793 isoform X1 [Lingula anatina]                     | GCF_001039355.2 | TRADDN-DEDD2 |
| XP_013380662.1 | TRADDN-DEDD2                         | 326  | LOC106151793       | metazoa | Lingula anatina           | uncharacterized protein LOC106151793 isoform X2 [Lingula anatina]                     | GCF_001039355.2 | TRADDN-DEDD2 |
| XP_013392589.1 | TRADDN-DEDD2                         | 170  | LOC106160515       | metazoa | Lingula anatina           | uncharacterized protein LOC106160515 [Lingula anatina]                                | GCF_001039355.2 | TRADDN-DEDD2 |
| XP_013421807.1 | TRADDN-DEDD2                         | 387  | LOC106181845       | metazoa | Lingula anatina           | uncharacterized protein LOC106181845 [Lingula anatina]                                | GCF_001039355.2 | TRADDN-DEDD2 |
| PAA67295.1     | TRADDN-DEDD2                         | 311  | BOX15_Mlig007289g1 | metazoa | Macrostomum lignano       | hypothetical protein BOX15_Mlig007289g1 [Macrostomum lignano]                         | GCA_002269645.1 | TRADDN-DEDD2 |
| PRD34936.1     | TRADDN-DEDD2                         | 240  | NCL1_13077         | metazoa | Nephila clavipes          | Dedd [Nephila clavipes]                                                               | GCA_002102615.1 | TRADDN-DEDD2 |
| XP_018652159.1 | TRADDN-DEDD2                         | 522  | Smp_169670.1       | metazoa | Schistosoma mansoni       | hypothetical protein Smp_169670.1 [Schistosoma mansoni]                               | GCF_000237925.1 | TRADDN-DEDD2 |
| XP_013393640.1 | TRADDN-DEDD2+Death                   | 1097 | LOC106161282       | metazoa | Lingula anatina           | uncharacterized protein LOC106161282 [Lingula anatina]                                | GCF_001039355.2 | TRADDN-DEDD2 |
| XP_013419526.1 | TRADDN-DEDD2+Death                   | 1322 | LOC106180164       | metazoa | Lingula anatina           | uncharacterized protein LOC106180164 isoform X1 [Lingula anatina]                     | GCF_001039355.2 | TRADDN-DEDD2 |
| XP_013419534.1 | TRADDN-DEDD2+Death                   | 1277 | LOC106180164       | metazoa | Lingula anatina           | uncharacterized protein LOC106180164 isoform X2 [Lingula anatina]                     | GCF_001039355.2 | TRADDN-DEDD2 |
| XP_019853513.1 | TRADDN-NCOA6                         | 162  | LOC109582894       | metazoa | Amphimedon queenslandica  | PREDICTED: uncharacterized protein LOC109582894 [Amphimedon queenslandica]            | GCF_000090795.1 | TRADDN-NCOA6 |
| XP_019860989.1 | TRADDN-NCOA6                         | 129  | LOC109589327       | metazoa | Amphimedon queenslandica  | PREDICTED: uncharacterized protein LOC109589327 [Amphimedon queenslandica]            | GCF_000090795.1 | TRADDN-NCOA6 |
| XP_019861561.1 | TRADDN-NCOA6                         | 186  | LOC109590040       | metazoa | Amphimedon queenslandica  | PREDICTED: uncharacterized protein LOC109590040 [Amphimedon queenslandica]            | GCF_000090795.1 | TRADDN-NCOA6 |
| XP_019863799.1 | TRADDN-NCOA6                         | 288  | LOC109592940       | metazoa | Amphimedon queenslandica  | PREDICTED: uncharacterized protein LOC109592940, partial [Amphimedon queenslandica]   | GCF_000090795.1 | TRADDN-NCOA6 |
| XP_023215973.1 | TRADDN-NCOA6                         | 2564 | LOC111618641       | metazoa | Centruroides sculpturatus | uncharacterized protein LOC111618641 [Centruroides sculpturatus]                      | GCF_000671375.1 | TRADDN-NCOA6 |
| OTF82418.1     | TRADDN-NCOA6                         | 1068 | BLA29_000798       | metazoa | Euroglyphus maynei        | hypothetical protein BLA29_000798 [Euroglyphus maynei]                                | GCA_002135145.1 | TRADDN-NCOA6 |

| acc            | architecture | len  | gen.name        | taxend  | species                   | define                                                                                                         | gca             | clade        |
|----------------|--------------|------|-----------------|---------|---------------------------|----------------------------------------------------------------------------------------------------------------|-----------------|--------------|
| XP_018495753.1 | TRADDN-NCOA6 | 1106 | LOC108864486    | metazoa | Galendromus occidentalis  | PREDICTED: putative uncharacterized protein DDB_G0271606 [Galendromus occidentalis]                            | GCF_000255335.1 | TRADDN-NCOA6 |
| XP_002409522.1 | TRADDN-NCOA6 | 1417 | IscW_ISCW016558 | metazoa | Ixodes scapularis         | hypothetical protein IscW_ISCW016558 [Ixodes scapularis]                                                       | -               | TRADDN-NCOA6 |
| XP_013776014.2 | TRADDN-NCOA6 | 2652 | LOC106460818    | metazoa | Limulus polyphemus        | uncharacterized protein LOC106460818 isoform X1 [Limulus polyphemus]                                           | GCF_000517525.1 | TRADDN-NCOA6 |
| XP_013786660.1 | TRADDN-NCOA6 | 1027 | LOC106470641    | metazoa | Limulus polyphemus        | pheromone-regulated protein PRM7-like, partial [Limulus polyphemus]                                            | GCF_000517525.1 | TRADDN-NCOA6 |
| XP_022243330.1 | TRADDN-NCOA6 | 2647 | LOC106460818    | metazoa | Limulus polyphemus        | uncharacterized protein LOC106460818 isoform X2 [Limulus polyphemus]                                           | GCF_000517525.1 | TRADDN-NCOA6 |
| XP_022243331.1 | TRADDN-NCOA6 | 2592 | LOC106460818    | metazoa | Limulus polyphemus        | uncharacterized protein LOC106460818 isoform X3 [Limulus polyphemus]                                           | GCF_000517525.1 | TRADDN-NCOA6 |
| XP_022257147.1 | TRADDN-NCOA6 | 1944 | LOC106472893    | metazoa | Limulus polyphemus        | uncharacterized protein LOC106472893, partial [Limulus polyphemus]                                             | GCF_000517525.1 | TRADDN-NCOA6 |
| XP_022257455.1 | TRADDN-NCOA6 | 2874 | LOC106473285    | metazoa | Limulus polyphemus        | uncharacterized protein LOC106473285, partial [Limulus polyphemus]                                             | GCF_000517525.1 | TRADDN-NCOA6 |
| XP_013399320.1 | TRADDN-NCOA6 | 2286 | LOC106165614    | metazoa | Lingula anatina           | mucin-12 isoform X1 [Lingula anatina]                                                                          | GCF_001039355.2 | TRADDN-NCOA6 |
| XP_013399322.1 | TRADDN-NCOA6 | 2285 | LOC106165614    | metazoa | Lingula anatina           | mucin-12 isoform X2 [Lingula anatina]                                                                          | GCF_001039355.2 | TRADDN-NCOA6 |
| XP_013399323.1 | TRADDN-NCOA6 | 2281 | LOC106165614    | metazoa | Lingula anatina           | mucin-12 isoform X3 [Lingula anatina]                                                                          | GCF_001039355.2 | TRADDN-NCOA6 |
| XP_015923751.1 | TRADDN-NCOA6 | 2522 | LOC107452001    | metazoa | Parasteatoda tepidariorum | uncharacterized threonine-rich GPI-anchored glycoprotein PJ4664.02-like isoform X1 [Parasteatoda tepidariorum] | GCF_000365465.2 | TRADDN-NCOA6 |
| XP_015923752.1 | TRADDN-NCOA6 | 2513 | LOC107452001    | metazoa | Parasteatoda tepidariorum | uncharacterized threonine-rich GPI-anchored glycoprotein PJ4664.02-like isoform X2 [Parasteatoda tepidariorum] | GCF_000365465.2 | TRADDN-NCOA6 |
| XP_014662554.1 | TRADDN-NCOA6 | 2048 | LOC106805474    | metazoa | Priapulus caudatus        | PREDICTED: serine-rich adhesin for platelets-like [Priapulus caudatus]                                         | GCF_000485595.1 | TRADDN-NCOA6 |
| KPM06795.1     | TRADDN-NCOA6 | 2407 | QR98_0052740    | metazoa | Sarcoptes scabiei         | hypothetical protein QR98_0052740 [Sarcoptes scabiei]                                                          | GCA_000828355.1 | TRADDN-NCOA6 |
| XP_015793616.1 | TRADDN-NCOA6 | 288  | LOC107370147    | metazoa | Tetranychus urticae       | uncharacterized protein LOC107370147 isoform X2 [Tetranychus urticae]                                          | GCF_000239435.1 | TRADDN-NCOA6 |
| XP_022666252.1 | TRADDN-NCOA6 | 1692 | LOC111252497    | metazoa | Varroa destructor         | histone-lysine N-methyltransferase 2D-like isoform X1 [Varroa destructor]                                      | GCF_002443255.1 | TRADDN-NCOA6 |

| acc            | architecture                              | len  | gen.name     | taxend  | species                  | define                                                                                                                | gca             | clade        |
|----------------|-------------------------------------------|------|--------------|---------|--------------------------|-----------------------------------------------------------------------------------------------------------------------|-----------------|--------------|
| XP_022666261.1 | TRADDN-NCOA6                              | 1689 | LOC111252497 | metazoa | Varroa destructor        | mediator of RNA polymerase II transcription subunit 12-like isoform X2 [Varroa destructor]                            | GCF_002443255.1 | TRADDN-NCOA6 |
| XP_022666270.1 | TRADDN-NCOA6                              | 1601 | LOC111252497 | metazoa | Varroa destructor        | histone-lysine N-methyltransferase 2D-like isoform X3 [Varroa destructor]                                             | GCF_002443255.1 | TRADDN-NCOA6 |
| XP_022708482.1 | TRADDN-NCOA6                              | 1694 | LOC111271766 | metazoa | Varroa jacobsoni         | histone-lysine N-methyltransferase 2D-like isoform X1 [Varroa jacobsoni]                                              | GCF_002532875.1 | TRADDN-NCOA6 |
| XP_022708484.1 | TRADDN-NCOA6                              | 1603 | LOC111271766 | metazoa | Varroa jacobsoni         | histone-lysine N-methyltransferase 2D-like isoform X2 [Varroa jacobsoni]                                              | GCF_002532875.1 | TRADDN-NCOA6 |
| XP_011409118.1 | TRADDN-NCOA6+Ankyrin                      | 348  | LOC105316026 | metazoa | Amphimedon queenslandica | PREDICTED: ankyrin repeat domain-containing protein 29-like, partial [Amphimedon queenslandica]                       | GCF_000090795.1 | TRADDN-NCOA6 |
| XP_011409199.1 | TRADDN-NCOA6+Ankyrin                      | 203  | LOC105316093 | metazoa | Amphimedon queenslandica | PREDICTED: ankyrin-3-like [Amphimedon queenslandica]                                                                  | GCF_000090795.1 | TRADDN-NCOA6 |
| XP_019850301.1 | TRADDN-NCOA6+Ankyrin                      | 636  | LOC105312201 | metazoa | Amphimedon queenslandica | PREDICTED: ankyrin repeat domain-containing protein 17-like [Amphimedon queenslandica]                                | GCF_000090795.1 | TRADDN-NCOA6 |
| XP_019857878.1 | TRADDN-NCOA6+Ankyrin                      | 658  | LOC109586144 | metazoa | Amphimedon queenslandica | PREDICTED: ankyrin repeat domain-containing protein 50-like [Amphimedon queenslandica]                                | GCF_000090795.1 | TRADDN-NCOA6 |
| XP_019858083.1 | TRADDN-NCOA6+Ankyrin                      | 2099 | LOC100633272 | metazoa | Amphimedon queenslandica | PREDICTED: uncharacterized protein LOC100633272 [Amphimedon queenslandica]                                            | GCF_000090795.1 | TRADDN-NCOA6 |
| XP_019858350.1 | TRADDN-NCOA6+Ankyrin                      | 611  | LOC109586592 | metazoa | Amphimedon queenslandica | PREDICTED: uncharacterized protein LOC109586592, partial [Amphimedon queenslandica]                                   | GCF_000090795.1 | TRADDN-NCOA6 |
| XP_019858351.1 | TRADDN-NCOA6+Ankyrin                      | 668  | LOC109586593 | metazoa | Amphimedon queenslandica | PREDICTED: ankyrin repeat domain-containing protein 17-like [Amphimedon queenslandica]                                | GCF_000090795.1 | TRADDN-NCOA6 |
| XP_019860272.1 | TRADDN-NCOA6+Ankyrin                      | 737  | LOC105315012 | metazoa | Amphimedon queenslandica | PREDICTED: LOW QUALITY PROTEIN: ankyrin repeat domain-containing protein 50-like [Amphimedon queenslandica]           | GCF_000090795.1 | TRADDN-NCOA6 |
| XP_019861354.1 | TRADDN-NCOA6+Ankyrin                      | 934  | LOC109580161 | metazoa | Amphimedon queenslandica | PREDICTED: ankyrin repeat domain-containing protein 50-like [Amphimedon queenslandica]                                | GCF_000090795.1 | TRADDN-NCOA6 |
| XP_019854640.1 | TRADDN-NCOA6+Ankyrin+LRRs                 | 478  | LOC105313507 | metazoa | Amphimedon queenslandica | PREDICTED: tankyrase-1-like [Amphimedon queenslandica]                                                                | GCF_000090795.1 | TRADDN-NCOA6 |
| XP_011409104.1 | TRADDN-NCOA6+Ankyrin+NACHT                | 425  | LOC105316014 | metazoa | Amphimedon queenslandica | PREDICTED: uncharacterized protein LOC105316014, partial [Amphimedon queenslandica]                                   | GCF_000090795.1 | TRADDN-NCOA6 |
| XP_019852240.1 | TRADDN-NCOA6+Ankyrin+TRADDN-NCOA6+Ankyrin | 1414 | LOC109582083 | metazoa | Amphimedon queenslandica | PREDICTED: serine/threonine-protein phosphatase 6 regulatory ankyrin repeat subunit B-like [Amphimedon queenslandica] | GCF_000090795.1 | TRADDN-NCOA6 |
| XP_011408474.1 | TRADDN-NCOA6+CASPASE                      | 366  | LOC105315492 | metazoa | Amphimedon queenslandica | PREDICTED: caspase-3-like [Amphimedon queenslandica]                                                                  | GCF_000090795.1 | TRADDN-NCOA6 |

| acc            | architecture                         | len | gen.name     | taxend  | species                  | define                                                                                               | gca             | clade        |
|----------------|--------------------------------------|-----|--------------|---------|--------------------------|------------------------------------------------------------------------------------------------------|-----------------|--------------|
| XP_019858304.1 | TRADDN-NCOA6+Coiled-coil             | 368 | LOC109586544 | metazoa | Amphimedon queenslandica | PREDICTED: uncharacterized protein LOC109586544                                                      | GCF_000090795.1 | TRADDN-NCOA6 |
| XP_019858663.1 | TRADDN-NCOA6+Coiled-coil             | 202 | LOC109586878 | metazoa | Amphimedon queenslandica | PREDICTED: uncharacterized protein LOC109586878 [Amphimedon queenslandica]                           | GCF_000090795.1 | TRADDN-NCOA6 |
| XP_019859162.1 | TRADDN-NCOA6+Coiled-coil             | 195 | LOC109587363 | metazoa | Amphimedon queenslandica | PREDICTED: uncharacterized protein LOC109587363, partial [Amphimedon queenslandica]                  | GCF_000090795.1 | TRADDN-NCOA6 |
| XP_019860361.1 | TRADDN-NCOA6+Coiled-coil             | 395 | LOC109588658 | metazoa | Amphimedon queenslandica | PREDICTED: uncharacterized protein LOC109588658 [Amphimedon queenslandica]                           | GCF_000090795.1 | TRADDN-NCOA6 |
| XP_019861027.1 | TRADDN-NCOA6+Coiled-coil             | 356 | LOC109589378 | metazoa | Amphimedon queenslandica | PREDICTED: histone-lysine N-methyltransferase, H3 lysine-79 specific-like [Amphimedon queenslandica] | GCF_000090795.1 | TRADDN-NCOA6 |
| XP_019863404.1 | TRADDN-NCOA6+Coiled-coil             | 280 | LOC109592390 | metazoa | Amphimedon queenslandica | PREDICTED: protein NETWORKED 1D-like [Amphimedon queenslandica]                                      | GCF_000090795.1 | TRADDN-NCOA6 |
| XP_019863811.1 | TRADDN-NCOA6+Coiled-coil             | 186 | LOC109592958 | metazoa | Amphimedon queenslandica | PREDICTED: uncharacterized protein LOC109592958 [Amphimedon queenslandica]                           | GCF_000090795.1 | TRADDN-NCOA6 |
| XP_019862385.1 | TRADDN-NCOA6+Death+CARD+DED          | 613 | LOC109591010 | metazoa | Amphimedon queenslandica | PREDICTED: uncharacterized protein LOC109591010 [Amphimedon queenslandica]                           | GCF_000090795.1 | TRADDN-NCOA6 |
| XP_019861074.1 | TRADDN-NCOA6+DED                     | 260 | LOC109589425 | metazoa | Amphimedon queenslandica | PREDICTED: uncharacterized protein LOC109589425 [Amphimedon queenslandica]                           | GCF_000090795.1 | TRADDN-NCOA6 |
| XP_019853789.1 | TRADDN-NCOA6+HSP70                   | 394 | LOC109583059 | metazoa | Amphimedon queenslandica | PREDICTED: heat shock 70 kDa protein 12A-like [Amphimedon queenslandica]                             | GCF_000090795.1 | TRADDN-NCOA6 |
| XP_019859366.1 | TRADDN-NCOA6+LRRs                    | 285 | LOC109587575 | metazoa | Amphimedon queenslandica | PREDICTED: uncharacterized protein LOC109587575 [Amphimedon queenslandica]                           | GCF_000090795.1 | TRADDN-NCOA6 |
| XP_019860334.1 | TRADDN-NCOA6+LRRs                    | 405 | LOC109588630 | metazoa | Amphimedon queenslandica | PREDICTED: uncharacterized protein LOC109588630 [Amphimedon queenslandica]                           | GCF_000090795.1 | TRADDN-NCOA6 |
| XP_019863044.1 | TRADDN-NCOA6+LRRs                    | 280 | LOC109591879 | metazoa | Amphimedon queenslandica | PREDICTED: ARF GTPase-activating protein GIT1-like [Amphimedon queenslandica]                        | GCF_000090795.1 | TRADDN-NCOA6 |
| XP_019861299.1 | TRADDN-NCOA6+TM+TM+TM+TM+TM+TM+TM+TM | 386 | LOC109589697 | metazoa | Amphimedon queenslandica | PREDICTED: uncharacterized protein LOC109589697 [Amphimedon queenslandica]                           | GCF_000090795.1 | TRADDN-NCOA6 |
| XP_019858034.1 | TRADDN-NCOA6+UPA+UPA+UPA             | 664 | LOC109586295 | metazoa | Amphimedon queenslandica | PREDICTED: uncharacterized protein LOC109586295 [Amphimedon queenslandica]                           | GCF_000090795.1 | TRADDN-NCOA6 |
| XP_019860681.1 | TRADDN-NCOA6+UPA+UPA+UPA             | 516 | LOC109589000 | metazoa | Amphimedon queenslandica | PREDICTED: uncharacterized protein LOC109589000 [Amphimedon queenslandica]                           | GCF_000090795.1 | TRADDN-NCOA6 |

| acc            | architecture                                                                   | len  | gen.name          | taxend   | species                  | define                                                                                                | gca             | clade        |
|----------------|--------------------------------------------------------------------------------|------|-------------------|----------|--------------------------|-------------------------------------------------------------------------------------------------------|-----------------|--------------|
| XP_019850766.1 | TRADDN-NCOA6+ZnR+RING+IBR+IBR                                                  | 589  | LOC100634100      | metazoa  | Amphimedon queenslandica | PREDICTED: ranBP-type and C3HC4-type zinc finger-containing protein 1-like [Amphimedon queenslandica] | GCF_000090795.1 | TRADDN-NCOA6 |
| ELT91616.1     | CARD+TRADDN-DEDD2                                                              | 240  | CAPTEDRAFT_211634 | annelida | Capitella teleta         | hypothetical protein CAPTEDRAFT_211634 [Capitella teleta]                                             | GCA_000328365.1 | TRADDN-DEDD2 |
| ELT98186.1     | CARD+TRADDN-DEDD2                                                              | 225  | CAPTEDRAFT_192039 | annelida | Capitella teleta         | hypothetical protein CAPTEDRAFT_192039, partial [Capitella teleta]                                    | GCA_000328365.1 | TRADDN-DEDD2 |
| ELT98437.1     | CARD+TRADDN-DEDD2                                                              | 299  | CAPTEDRAFT_205544 | annelida | Capitella teleta         | hypothetical protein CAPTEDRAFT_205544 [Capitella teleta]                                             | GCA_000328365.1 | TRADDN-DEDD2 |
| ELU00167.1     | CARD+TRADDN-DEDD2                                                              | 422  | CAPTEDRAFT_220800 | annelida | Capitella teleta         | hypothetical protein CAPTEDRAFT_220800 [Capitella teleta]                                             | GCA_000328365.1 | TRADDN-DEDD2 |
| ELU13510.1     | CARD+TRADDN-DEDD2                                                              | 244  | CAPTEDRAFT_187038 | annelida | Capitella teleta         | hypothetical protein CAPTEDRAFT_187038 [Capitella teleta]                                             | GCA_000328365.1 | TRADDN-DEDD2 |
| ELU15725.1     | CARD+TRADDN-DEDD2                                                              | 372  | CAPTEDRAFT_201143 | annelida | Capitella teleta         | hypothetical protein CAPTEDRAFT_201143 [Capitella teleta]                                             | GCA_000328365.1 | TRADDN-DEDD2 |
| ELT99737.1     | low-complexity+DED+TRADDN-DEDD2                                                | 327  | CAPTEDRAFT_161793 | annelida | Capitella teleta         | hypothetical protein CAPTEDRAFT_161793, partial [Capitella teleta]                                    | GCA_000328365.1 | TRADDN-DEDD2 |
| ELT87317.1     | TRADDN-DEDD2+Coiled-coil+7TM_GPCR_Srsx                                         | 827  | CAPTEDRAFT_189113 | annelida | Capitella teleta         | hypothetical protein CAPTEDRAFT_189113 [Capitella teleta]                                             | GCA_000328365.1 | TRADDN-DEDD2 |
| XP_009027296.1 | TRADDN-NCOA6                                                                   | 1503 | HELRODRAFT_163970 | annelida | Helobdella robusta       | hypothetical protein HELRODRAFT_163970 [Helobdella robusta]                                           | GCF_000326865.1 | TRADDN-NCOA6 |
| EEN43952.1     | Beta-propeller+DED+low-complexity+TRADDN-NCOA6+domain1+Pro-rich+Beta-propeller | 1101 | BRAFLDRAFT_87329  | chordata | Branchiostoma floridae   | hypothetical protein BRAFLDRAFT_87329 [Branchiostoma floridae]                                        | GCA_000003815.1 | TRADDN-NCOA6 |
| XP_002587941.1 | Beta-propeller+DED+low-complexity+TRADDN-NCOA6+domain1+Pro-rich+Beta-propeller | 1101 | BRAFLDRAFT_87329  | chordata | Branchiostoma floridae   | hypothetical protein BRAFLDRAFT_87329 [Branchiostoma floridae]                                        | GCF_000003815.1 | TRADDN-NCOA6 |
| EEN43902.1     | Beta-propeller+DED+TRADDN-NCOA6+domain1+Pro-rich+Beta-propeller                | 946  | BRAFLDRAFT_87279  | chordata | Branchiostoma floridae   | hypothetical protein BRAFLDRAFT_87279 [Branchiostoma floridae]                                        | GCA_000003815.1 | TRADDN-NCOA6 |
| XP_002587891.1 | Beta-propeller+DED+TRADDN-NCOA6+domain1+Pro-rich+Beta-propeller                | 946  | BRAFLDRAFT_87279  | chordata | Branchiostoma floridae   | hypothetical protein BRAFLDRAFT_87279 [Branchiostoma floridae]                                        | GCF_000003815.1 | TRADDN-NCOA6 |
| XP_019633890.1 | CARD+Death+FN3+TRADDN-DEDD2+Death+Death+zf-TAZ+LRRs                            | 1789 | LOC109477248      | chordata | Branchiostoma belcheri   | PREDICTED: uncharacterized protein LOC109477248 [Branchiostoma belcheri]                              | GCF_001625305.1 | TRADDN-DEDD2 |
| XP_019633519.1 | CARD+Death+TRADDN-DEDD2                                                        | 505  | LOC109476942      | chordata | Branchiostoma belcheri   | PREDICTED: uncharacterized protein LOC109476942 [Branchiostoma belcheri]                              | GCF_001625305.1 | TRADDN-DEDD2 |
| XP_002605446.1 | CARD+FN3+TRADDN-DEDD2+NTP_transf+HEPN+TPRs                                     | 1299 | BRAFLDRAFT_74261  | chordata | Branchiostoma floridae   | hypothetical protein BRAFLDRAFT_74261 [Branchiostoma floridae]                                        | GCF_000003815.1 | TRADDN-DEDD2 |

| acc            | architecture                                                               | len  | gen.name          | taxend   | species                | define                                                                                        | gca             | clade        |
|----------------|----------------------------------------------------------------------------|------|-------------------|----------|------------------------|-----------------------------------------------------------------------------------------------|-----------------|--------------|
| XP_019613615.1 | CARD+FN3+TRADDN-DEDD2+Nucleotidyltransferase+HEPN+TPRs                     | 1361 | LOC109461677      | chordata | Branchiostoma belcheri | PREDICTED: uncharacterized protein LOC109461677 [Branchiostoma belcheri]                      | GCF_001625305.1 | TRADDN-DEDD2 |
| XP_019630679.1 | CARD+FN3+TRADDN-DEDD2+STAND+LRRs+Death+GT4-GTase                           | 2024 | LOC109474759      | chordata | Branchiostoma belcheri | PREDICTED: uncharacterized protein LOC109474759 isoform X1 [Branchiostoma belcheri]           | GCF_001625305.1 | TRADDN-DEDD2 |
| XP_019630680.1 | CARD+FN3+TRADDN-DEDD2+STAND+LRRs+Death+GT4-GTase                           | 2001 | LOC109474759      | chordata | Branchiostoma belcheri | PREDICTED: uncharacterized protein LOC109474759 isoform X2 [Branchiostoma belcheri]           | GCF_001625305.1 | TRADDN-DEDD2 |
| XP_019631927.1 | CARD+GT4-GTase+Death+TRADDN-DEDD2+Death+helical-region+LRRs                | 2067 | LOC109475631      | chordata | Branchiostoma belcheri | PREDICTED: LOW QUALITY PROTEIN: uncharacterized protein LOC109475631 [Branchiostoma belcheri] | GCF_001625305.1 | TRADDN-DEDD2 |
| XP_002589318.1 | CARD+TIR+Death+TRADDN-DEDD2+Death+LRRs+Death+Death+TRADDN-DEDD2+Death+LRRs | 2945 | BRAFLDRAFT_77771  | chordata | Branchiostoma floridae | hypothetical protein BRAFLDRAFT_77771 [Branchiostoma floridae]                                | GCF_000003815.1 | TRADDN-DEDD2 |
| XP_019620289.1 | CARD+TIR+TRADDN-DEDD2                                                      | 435  | LOC109466871      | chordata | Branchiostoma belcheri | PREDICTED: uncharacterized protein LOC109466871 [Branchiostoma belcheri]                      | GCF_001625305.1 | TRADDN-DEDD2 |
| XP_019637190.1 | CARD+TIR+TRADDN-DEDD2                                                      | 552  | LOC109479645      | chordata | Branchiostoma belcheri | PREDICTED: uncharacterized protein LOC109479645 [Branchiostoma belcheri]                      | GCF_001625305.1 | TRADDN-DEDD2 |
| XP_019640463.1 | CARD+TIR+TRADDN-DEDD2                                                      | 450  | LOC109482212      | chordata | Branchiostoma belcheri | PREDICTED: uncharacterized protein LOC109482212 [Branchiostoma belcheri]                      | GCF_001625305.1 | TRADDN-DEDD2 |
| XP_002603309.1 | CARD+TIR+TRADDN-DEDD2                                                      | 492  | BRAFLDRAFT_71397  | chordata | Branchiostoma floridae | hypothetical protein BRAFLDRAFT_71397 [Branchiostoma floridae]                                | GCF_000003815.1 | TRADDN-DEDD2 |
| XP_002610849.1 | CARD+TIR+TRADDN-DEDD2                                                      | 531  | BRAFLDRAFT_94911  | chordata | Branchiostoma floridae | hypothetical protein BRAFLDRAFT_94911, partial [Branchiostoma floridae]                       | GCF_000003815.1 | TRADDN-DEDD2 |
| XP_002599430.1 | CARD+TIR+TRADDN-DEDD2+Coiled-coil+STAND+Death+FIIND                        | 1426 | BRAFLDRAFT_106573 | chordata | Branchiostoma floridae | hypothetical protein BRAFLDRAFT_106573 [Branchiostoma floridae]                               | GCF_000003815.1 | TRADDN-DEDD2 |
| XP_002589337.1 | CARD+TIR+TRADDN-DEDD2+Death+LRRs                                           | 1627 | BRAFLDRAFT_121797 | chordata | Branchiostoma floridae | hypothetical protein BRAFLDRAFT_121797 [Branchiostoma floridae]                               | GCF_000003815.1 | TRADDN-DEDD2 |
| XP_002592322.1 | CARD+TIR+TRADDN-DEDD2+Dynammin-like_sGTPase+helical-region+Pkinase         | 1265 | BRAFLDRAFT_101263 | chordata | Branchiostoma floridae | hypothetical protein BRAFLDRAFT_101263 [Branchiostoma floridae]                               | GCF_000003815.1 | TRADDN-DEDD2 |
| XP_002603295.1 | CARD+TIR+TRADDN-DEDD2+LRRs                                                 | 903  | BRAFLDRAFT_71410  | chordata | Branchiostoma floridae | hypothetical protein BRAFLDRAFT_71410 [Branchiostoma floridae]                                | GCF_000003815.1 | TRADDN-DEDD2 |
| XP_019637202.1 | CARD+TIR+TRADDN-DEDD2+STAND                                                | 751  | LOC109479656      | chordata | Branchiostoma belcheri | PREDICTED: uncharacterized protein LOC109479656 [Branchiostoma belcheri]                      | GCF_001625305.1 | TRADDN-DEDD2 |
| XP_019637612.1 | CARD+TRADDN-DEDD2+LRRs                                                     | 858  | LOC109479969      | chordata | Branchiostoma belcheri | PREDICTED: uncharacterized protein LOC109479969 [Branchiostoma belcheri]                      | GCF_001625305.1 | TRADDN-DEDD2 |
| XP_002614043.1 | CARD+TRADDN-DEDD2+LRRs                                                     | 981  | BRAFLDRAFT_67373  | chordata | Branchiostoma floridae | hypothetical protein BRAFLDRAFT_67373 [Branchiostoma floridae]                                | GCF_000003815.1 | TRADDN-DEDD2 |

| acc            | architecture                                               | len  | gen.name          | taxend   | species                | define                                                                   | gca             | clade        |
|----------------|------------------------------------------------------------|------|-------------------|----------|------------------------|--------------------------------------------------------------------------|-----------------|--------------|
| XP_019616599.1 | Death+Death+TRADDN-DEDD2+Death                             | 941  | LOC109464106      | chordata | Branchiostoma belcheri | PREDICTED: uncharacterized protein LOC109464106 [Branchiostoma belcheri] | GCF_001625305.1 | TRADDN-DEDD2 |
| XP_019632346.1 | Death+Death+TRADDN-DEDD2+Death                             | 692  | LOC109475980      | chordata | Branchiostoma belcheri | PREDICTED: uncharacterized protein LOC109475980 [Branchiostoma belcheri] | GCF_001625305.1 | TRADDN-DEDD2 |
| XP_019633949.1 | Death+Death+TRADDN-DEDD2+Death+LRRs                        | 973  | LOC109477286      | chordata | Branchiostoma belcheri | PREDICTED: uncharacterized protein LOC109477286 [Branchiostoma belcheri] | GCF_001625305.1 | TRADDN-DEDD2 |
| XP_019633976.1 | Death+Death+TRADDN-DEDD2+Death+LRRs                        | 1224 | LOC109477298      | chordata | Branchiostoma belcheri | PREDICTED: uncharacterized protein LOC109477298 [Branchiostoma belcheri] | GCF_001625305.1 | TRADDN-DEDD2 |
| XP_002589336.1 | Death+Death+TRADDN-DEDD2+Death+LRRs                        | 1470 | BRAFLDRAFT_77788  | chordata | Branchiostoma floridae | hypothetical protein BRAFLDRAFT_77788 [Branchiostoma floridae]           | GCF_000003815.1 | TRADDN-DEDD2 |
| XP_002607774.1 | Death+Death+TRADDN-DEDD2+Death+LRRs                        | 753  | BRAFLDRAFT_64173  | chordata | Branchiostoma floridae | hypothetical protein BRAFLDRAFT_64173 [Branchiostoma floridae]           | GCF_000003815.1 | TRADDN-DEDD2 |
| XP_019620287.1 | Death+FN3+FN3+TRADDN-DEDD2                                 | 526  | LOC109466869      | chordata | Branchiostoma belcheri | PREDICTED: uncharacterized protein LOC109466869 [Branchiostoma belcheri] | GCF_001625305.1 | TRADDN-DEDD2 |
| XP_019626208.1 | Death+FN3+FN3+TRADDN-DEDD2+Coiled-coil+Death+FN3+FN3+Death | 1298 | LOC109471359      | chordata | Branchiostoma belcheri | PREDICTED: uncharacterized protein LOC109471359 [Branchiostoma belcheri] | GCF_001625305.1 | TRADDN-DEDD2 |
| XP_002587196.1 | Death+FN3+FN3+TRADDN-DEDD2+p450                            | 811  | BRAFLDRAFT_102082 | chordata | Branchiostoma floridae | hypothetical protein BRAFLDRAFT_102082, partial [Branchiostoma floridae] | GCF_000003815.1 | TRADDN-DEDD2 |
| XP_019621042.1 | Death+TRADDN-DEDD2+CARD+Kinesin+SIGMA-HTH                  | 862  | LOC109467451      | chordata | Branchiostoma belcheri | PREDICTED: kinesin-like protein KIF3A [Branchiostoma belcheri]           | GCF_001625305.1 | TRADDN-DEDD2 |
| XP_018669464.1 | Death+TRADDN-DEDD2+Coiled-coil                             | 712  | LOC100180910      | chordata | Ciona intestinalis     | uncharacterized protein LOC100180910 isoform X1 [Ciona intestinalis]     | GCF_000224145.3 | TRADDN-DEDD2 |
| XP_026692598.1 | Death+TRADDN-DEDD2+Coiled-coil                             | 711  | LOC100180910      | chordata | Ciona intestinalis     | uncharacterized protein LOC100180910 isoform X2 [Ciona intestinalis]     | GCF_000224145.3 | TRADDN-DEDD2 |
| XP_019632108.1 | Death+TRADDN-DEDD2+Coiled-coil+Beta-propeller              | 707  | LOC109475790      | chordata | Branchiostoma belcheri | PREDICTED: uncharacterized protein LOC109475790 [Branchiostoma belcheri] | GCF_001625305.1 | TRADDN-DEDD2 |
| XP_019640973.1 | Death+TRADDN-DEDD2+Coiled-coil+Beta-propeller              | 700  | LOC109482613      | chordata | Branchiostoma belcheri | PREDICTED: uncharacterized protein LOC109482613 [Branchiostoma belcheri] | GCF_001625305.1 | TRADDN-DEDD2 |
| XP_019642611.1 | Death+TRADDN-DEDD2+Coiled-coil+Beta-propeller              | 708  | LOC109483912      | chordata | Branchiostoma belcheri | PREDICTED: uncharacterized protein LOC109483912 [Branchiostoma belcheri] | GCF_001625305.1 | TRADDN-DEDD2 |
| XP_002607640.1 | Death+TRADDN-DEDD2+Coiled-coil+Beta-propeller              | 735  | BRAFLDRAFT_84671  | chordata | Branchiostoma floridae | hypothetical protein BRAFLDRAFT_84671 [Branchiostoma floridae]           | GCF_000003815.1 | TRADDN-DEDD2 |
| XP_002607641.1 | Death+TRADDN-DEDD2+Coiled-coil+Beta-propeller              | 798  | BRAFLDRAFT_84670  | chordata | Branchiostoma floridae | hypothetical protein BRAFLDRAFT_84670 [Branchiostoma floridae]           | GCF_000003815.1 | TRADDN-DEDD2 |

| acc            | architecture                                                | len  | gen.name         | taxend   | species                | define                                                                                    | gca             | clade        |
|----------------|-------------------------------------------------------------|------|------------------|----------|------------------------|-------------------------------------------------------------------------------------------|-----------------|--------------|
| XP_002592893.1 | Death+TRADDN-DEDD2+Coiled-coil+GT4-GTase                    | 873  | BRAFLDRAFT_65479 | chordata | Branchiostoma floridae | hypothetical protein<br>BRAFLDRAFT_65479<br>[Branchiostoma floridae]                      | GCF_000003815.1 | TRADDN-DEDD2 |
| XP_019628563.1 | Death+TRADDN-DEDD2+DUF4561                                  | 564  | LOC109473095     | chordata | Branchiostoma belcheri | PREDICTED: uncharacterized<br>protein LOC109473095<br>[Branchiostoma belcheri]            | GCF_001625305.1 | TRADDN-DEDD2 |
| XP_002588465.1 | Death+TRADDN-DEDD2+DUF4561                                  | 564  | BRAFLDRAFT_63414 | chordata | Branchiostoma floridae | hypothetical protein<br>BRAFLDRAFT_63414<br>[Branchiostoma floridae]                      | GCF_000003815.1 | TRADDN-DEDD2 |
| XP_019643637.1 | Death+TRADDN-DEDD2+RING+NYN+CCCH-ZF                         | 851  | LOC109484719     | chordata | Branchiostoma belcheri | PREDICTED: uncharacterized<br>protein LOC109484719 isoform X1<br>[Branchiostoma belcheri] | GCF_001625305.1 | TRADDN-DEDD2 |
| XP_019643638.1 | Death+TRADDN-DEDD2+RING+NYN+CCCH-ZF                         | 850  | LOC109484719     | chordata | Branchiostoma belcheri | PREDICTED: uncharacterized<br>protein LOC109484719 isoform X2<br>[Branchiostoma belcheri] | GCF_001625305.1 | TRADDN-DEDD2 |
| XP_002614092.1 | Death+TRADDN-DEDD2+STAND+wHTH+helical-region+LRRs+Ig+TM+SH3 | 1642 | BRAFLDRAFT_67322 | chordata | Branchiostoma floridae | hypothetical protein<br>BRAFLDRAFT_67322<br>[Branchiostoma floridae]                      | GCF_000003815.1 | TRADDN-DEDD2 |
| XP_002602467.1 | DED+CARD+TRADDN-DEDD2                                       | 350  | BRAFLDRAFT_86851 | chordata | Branchiostoma floridae | hypothetical protein<br>BRAFLDRAFT_86851<br>[Branchiostoma floridae]                      | GCF_000003815.1 | TRADDN-DEDD2 |
| XP_002602468.1 | DED+CARD+TRADDN-DEDD2                                       | 457  | BRAFLDRAFT_86852 | chordata | Branchiostoma floridae | hypothetical protein<br>BRAFLDRAFT_86852<br>[Branchiostoma floridae]                      | GCF_000003815.1 | TRADDN-DEDD2 |
| XP_019619676.1 | DED+Death+TRADDN-DEDD2+Coiled-coil+Ankyrin                  | 910  | LOC109466407     | chordata | Branchiostoma belcheri | PREDICTED: uncharacterized<br>protein LOC109466407<br>[Branchiostoma belcheri]            | GCF_001625305.1 | TRADDN-DEDD2 |
| XP_002589319.1 | DED+Death+TRADDN-DEDD2+Death+LRRs                           | 1288 | BRAFLDRAFT_77772 | chordata | Branchiostoma floridae | hypothetical protein<br>BRAFLDRAFT_77772<br>[Branchiostoma floridae]                      | GCF_000003815.1 | TRADDN-DEDD2 |
| XP_019640446.1 | DED+Death+TRADDN-DEDD2+GT4-GTase+GT4-GTase                  | 1614 | LOC109482191     | chordata | Branchiostoma belcheri | PREDICTED: uncharacterized<br>protein LOC109482191<br>[Branchiostoma belcheri]            | GCF_001625305.1 | TRADDN-DEDD2 |
| ACN39567.1     | DED+Death+TRADDN-NCOA6+domain1                              | 593  | -                | chordata | Branchiostoma floridae | DED, DD and repetition<br>domain-containing protein 1<br>[Branchiostoma floridae]         | -               | TRADDN-NCOA6 |
| EEN43918.1     | DED+Death+TRADDN-NCOA6+domain1+Pro-rich+Beta-propeller      | 841  | BRAFLDRAFT_87295 | chordata | Branchiostoma floridae | hypothetical protein<br>BRAFLDRAFT_87295<br>[Branchiostoma floridae]                      | GCA_000003815.1 | TRADDN-NCOA6 |
| EEN43936.1     | DED+Death+TRADDN-NCOA6+domain1+Pro-rich+Beta-propeller      | 830  | BRAFLDRAFT_87313 | chordata | Branchiostoma floridae | hypothetical protein<br>BRAFLDRAFT_87313<br>[Branchiostoma floridae]                      | GCA_000003815.1 | TRADDN-NCOA6 |
| EEN43954.1     | DED+Death+TRADDN-NCOA6+domain1+Pro-rich+Beta-propeller      | 931  | BRAFLDRAFT_87331 | chordata | Branchiostoma floridae | hypothetical protein<br>BRAFLDRAFT_87331<br>[Branchiostoma floridae]                      | GCA_000003815.1 | TRADDN-NCOA6 |
| XP_002587907.1 | DED+Death+TRADDN-NCOA6+domain1+Pro-rich+Beta-propeller      | 841  | BRAFLDRAFT_87295 | chordata | Branchiostoma floridae | hypothetical protein<br>BRAFLDRAFT_87295<br>[Branchiostoma floridae]                      | GCF_000003815.1 | TRADDN-NCOA6 |
| XP_002587925.1 | DED+Death+TRADDN-NCOA6+domain1+Pro-rich+Beta-propeller      | 830  | BRAFLDRAFT_87313 | chordata | Branchiostoma floridae | hypothetical protein<br>BRAFLDRAFT_87313<br>[Branchiostoma floridae]                      | GCF_000003815.1 | TRADDN-NCOA6 |



| acc            | architecture                                                                                            | len  | gen.name          | taxend   | species                | define                                                                         | gca             | clade        |
|----------------|---------------------------------------------------------------------------------------------------------|------|-------------------|----------|------------------------|--------------------------------------------------------------------------------|-----------------|--------------|
| XP_002587943.1 | DED+Death+TRADDN-NCOA6+domain1+Pro-rich+Beta-propeller                                                  | 931  | BRAFLDRAFT_87331  | chordata | Branchiostoma floridae | hypothetical protein<br>BRAFLDRAFT_87331<br>[Branchiostoma floridae]           | GCF_000003815.1 | TRADDN-NCOA6 |
| EEN43913.1     | DED+Death+TRADDN-NCOA6+domain1+Pro-rich+Beta-propeller+DED+TRADDN-NCOA6+domain1+Pro-rich+Beta-propeller | 1664 | BRAFLDRAFT_87290  | chordata | Branchiostoma floridae | hypothetical protein<br>BRAFLDRAFT_87290<br>[Branchiostoma floridae]           | GCA_000003815.1 | TRADDN-NCOA6 |
| XP_002587902.1 | DED+Death+TRADDN-NCOA6+domain1+Pro-rich+Beta-propeller+DED+TRADDN-NCOA6+domain1+Pro-rich+Beta-propeller | 1664 | BRAFLDRAFT_87290  | chordata | Branchiostoma floridae | hypothetical protein<br>BRAFLDRAFT_87290<br>[Branchiostoma floridae]           | GCF_000003815.1 | TRADDN-NCOA6 |
| EEN61843.1     | DED+DED+TRADDN-NCOA6+domain1+Pro-rich+Beta-propeller                                                    | 684  | BRAFLDRAFT_84318  | chordata | Branchiostoma floridae | hypothetical protein<br>BRAFLDRAFT_84318<br>[Branchiostoma floridae]           | GCA_000003815.1 | TRADDN-NCOA6 |
| XP_002605833.1 | DED+DED+TRADDN-NCOA6+domain1+Pro-rich+Beta-propeller                                                    | 684  | BRAFLDRAFT_84318  | chordata | Branchiostoma floridae | hypothetical protein<br>BRAFLDRAFT_84318<br>[Branchiostoma floridae]           | GCF_000003815.1 | TRADDN-NCOA6 |
| XP_019631370.1 | DED+FN3+FN3+TRADDN-DEDD2                                                                                | 530  | LOC109475213      | chordata | Branchiostoma belcheri | PREDICTED: uncharacterized<br>protein LOC109475213<br>[Branchiostoma belcheri] | GCF_001625305.1 | TRADDN-DEDD2 |
| EEN43934.1     | DED+low-complexity+Death+TRADDN-NCOA6+domain1+Pro-rich+Beta-propeller                                   | 908  | BRAFLDRAFT_87311  | chordata | Branchiostoma floridae | hypothetical protein<br>BRAFLDRAFT_87311<br>[Branchiostoma floridae]           | GCA_000003815.1 | TRADDN-NCOA6 |
| EEN43958.1     | DED+low-complexity+Death+TRADDN-NCOA6+domain1+Pro-rich+Beta-propeller                                   | 932  | BRAFLDRAFT_87335  | chordata | Branchiostoma floridae | hypothetical protein<br>BRAFLDRAFT_87335<br>[Branchiostoma floridae]           | GCA_000003815.1 | TRADDN-NCOA6 |
| XP_002587923.1 | DED+low-complexity+Death+TRADDN-NCOA6+domain1+Pro-rich+Beta-propeller                                   | 908  | BRAFLDRAFT_87311  | chordata | Branchiostoma floridae | hypothetical protein<br>BRAFLDRAFT_87311<br>[Branchiostoma floridae]           | GCF_000003815.1 | TRADDN-NCOA6 |
| XP_002587947.1 | DED+low-complexity+Death+TRADDN-NCOA6+domain1+Pro-rich+Beta-propeller                                   | 932  | BRAFLDRAFT_87335  | chordata | Branchiostoma floridae | hypothetical protein<br>BRAFLDRAFT_87335<br>[Branchiostoma floridae]           | GCF_000003815.1 | TRADDN-NCOA6 |
| EEN43928.1     | DED+low-complexity+Death+TRADDN-NCOA6+Ig+Ig                                                             | 503  | BRAFLDRAFT_87305  | chordata | Branchiostoma floridae | hypothetical protein<br>BRAFLDRAFT_87305<br>[Branchiostoma floridae]           | GCA_000003815.1 | TRADDN-NCOA6 |
| XP_002587917.1 | DED+low-complexity+Death+TRADDN-NCOA6+Ig+Ig                                                             | 503  | BRAFLDRAFT_87305  | chordata | Branchiostoma floridae | hypothetical protein<br>BRAFLDRAFT_87305<br>[Branchiostoma floridae]           | GCF_000003815.1 | TRADDN-NCOA6 |
| EEN42177.1     | DED+low-complexity+TRADDN-NCOA6+Beta-propeller                                                          | 649  | BRAFLDRAFT_109861 | chordata | Branchiostoma floridae | hypothetical protein<br>BRAFLDRAFT_109861<br>[Branchiostoma floridae]          | GCA_000003815.1 | TRADDN-NCOA6 |
| XP_002586166.1 | DED+low-complexity+TRADDN-NCOA6+Beta-propeller                                                          | 649  | BRAFLDRAFT_109861 | chordata | Branchiostoma floridae | hypothetical protein<br>BRAFLDRAFT_109861<br>[Branchiostoma floridae]          | GCF_000003815.1 | TRADDN-NCOA6 |
| EEN43907.1     | DED+low-complexity+TRADDN-NCOA6+domain1+DED+Death+TRADDN-NCOA6+domain1+Pro-rich+Beta-propeller          | 1288 | BRAFLDRAFT_87284  | chordata | Branchiostoma floridae | hypothetical protein<br>BRAFLDRAFT_87284<br>[Branchiostoma floridae]           | GCA_000003815.1 | TRADDN-NCOA6 |
| XP_002587896.1 | DED+low-complexity+TRADDN-NCOA6+domain1+DED+Death+TRADDN-NCOA6+domain1+Pro-rich+Beta-propeller          | 1288 | BRAFLDRAFT_87284  | chordata | Branchiostoma floridae | hypothetical protein<br>BRAFLDRAFT_87284<br>[Branchiostoma floridae]           | GCF_000003815.1 | TRADDN-NCOA6 |
| XP_019618785.1 | DED+low-complexity+TRADDN-NCOA6+domain1+Pro-rich+Beta-propeller                                         | 820  | LOC109465788      | chordata | Branchiostoma belcheri | PREDICTED: uncharacterized<br>protein LOC109465788<br>[Branchiostoma belcheri] | GCF_001625305.1 | TRADDN-NCOA6 |

| acc            | architecture                                                        | len  | gen.name         | taxend   | species                | define                                                                         | gca             | clade        |
|----------------|---------------------------------------------------------------------|------|------------------|----------|------------------------|--------------------------------------------------------------------------------|-----------------|--------------|
| EEN43903.1     | DED+low-complexity+TRADDN-NCOA6+domain1+Pro-rich+Beta-propeller     | 856  | BRAFLDRAFT_87280 | chordata | Branchiostoma floridae | hypothetical protein<br>BRAFLDRAFT_87280<br>[Branchiostoma floridae]           | GCA_000003815.1 | TRADDN-NCOA6 |
| EEN43909.1     | DED+low-complexity+TRADDN-NCOA6+domain1+Pro-rich+Beta-propeller     | 851  | BRAFLDRAFT_87286 | chordata | Branchiostoma floridae | hypothetical protein<br>BRAFLDRAFT_87286<br>[Branchiostoma floridae]           | GCA_000003815.1 | TRADDN-NCOA6 |
| EEN43949.1     | DED+low-complexity+TRADDN-NCOA6+domain1+Pro-rich+Beta-propeller     | 866  | BRAFLDRAFT_87326 | chordata | Branchiostoma floridae | hypothetical protein<br>BRAFLDRAFT_87326<br>[Branchiostoma floridae]           | GCA_000003815.1 | TRADDN-NCOA6 |
| EEN43955.1     | DED+low-complexity+TRADDN-NCOA6+domain1+Pro-rich+Beta-propeller     | 854  | BRAFLDRAFT_87332 | chordata | Branchiostoma floridae | hypothetical protein<br>BRAFLDRAFT_87332<br>[Branchiostoma floridae]           | GCA_000003815.1 | TRADDN-NCOA6 |
| XP_002587892.1 | DED+low-complexity+TRADDN-NCOA6+domain1+Pro-rich+Beta-propeller     | 856  | BRAFLDRAFT_87280 | chordata | Branchiostoma floridae | hypothetical protein<br>BRAFLDRAFT_87280<br>[Branchiostoma floridae]           | GCF_000003815.1 | TRADDN-NCOA6 |
| XP_002587898.1 | DED+low-complexity+TRADDN-NCOA6+domain1+Pro-rich+Beta-propeller     | 851  | BRAFLDRAFT_87286 | chordata | Branchiostoma floridae | hypothetical protein<br>BRAFLDRAFT_87286<br>[Branchiostoma floridae]           | GCF_000003815.1 | TRADDN-NCOA6 |
| XP_002587938.1 | DED+low-complexity+TRADDN-NCOA6+domain1+Pro-rich+Beta-propeller     | 866  | BRAFLDRAFT_87326 | chordata | Branchiostoma floridae | hypothetical protein<br>BRAFLDRAFT_87326<br>[Branchiostoma floridae]           | GCF_000003815.1 | TRADDN-NCOA6 |
| XP_002587944.1 | DED+low-complexity+TRADDN-NCOA6+domain1+Pro-rich+Beta-propeller     | 854  | BRAFLDRAFT_87332 | chordata | Branchiostoma floridae | hypothetical protein<br>BRAFLDRAFT_87332<br>[Branchiostoma floridae]           | GCF_000003815.1 | TRADDN-NCOA6 |
| EEN43939.1     | DED+low-complexity+TRADDN-NCOA6+domain1+Pro-rich+DED+Beta-propeller | 968  | BRAFLDRAFT_87316 | chordata | Branchiostoma floridae | hypothetical protein<br>BRAFLDRAFT_87316<br>[Branchiostoma floridae]           | GCA_000003815.1 | TRADDN-NCOA6 |
| XP_002587928.1 | DED+low-complexity+TRADDN-NCOA6+domain1+Pro-rich+DED+Beta-propeller | 968  | BRAFLDRAFT_87316 | chordata | Branchiostoma floridae | hypothetical protein<br>BRAFLDRAFT_87316<br>[Branchiostoma floridae]           | GCF_000003815.1 | TRADDN-NCOA6 |
| XP_019620964.1 | DED+TRADDN-DEDD2                                                    | 561  | LOC109467429     | chordata | Branchiostoma belcheri | PREDICTED: uncharacterized<br>protein LOC109467429<br>[Branchiostoma belcheri] | GCF_001625305.1 | TRADDN-DEDD2 |
| XP_002605016.1 | DED+TRADDN-DEDD2+Coiled-coil+C2H2-ZF+C2H2-ZF                        | 893  | BRAFLDRAFT_85156 | chordata | Branchiostoma floridae | hypothetical protein<br>BRAFLDRAFT_85156<br>[Branchiostoma floridae]           | GCF_000003815.1 | TRADDN-DEDD2 |
| XP_002599373.1 | DED+TRADDN-DEDD2+Coiled-coil+Death+Coiled-coil                      | 1029 | BRAFLDRAFT_64269 | chordata | Branchiostoma floridae | hypothetical protein<br>BRAFLDRAFT_64269<br>[Branchiostoma floridae]           | GCF_000003815.1 | TRADDN-DEDD2 |
| XP_002589317.1 | DED+TRADDN-DEDD2+STAND+STAND+wHTH+helical-region+LRRs               | 2458 | BRAFLDRAFT_77770 | chordata | Branchiostoma floridae | hypothetical protein<br>BRAFLDRAFT_77770<br>[Branchiostoma floridae]           | GCF_000003815.1 | TRADDN-DEDD2 |
| XP_019634615.1 | DED+TRADDN-NCOA6+domain1+Beta-propeller                             | 696  | LOC109477711     | chordata | Branchiostoma belcheri | PREDICTED: uncharacterized<br>protein LOC109477711<br>[Branchiostoma belcheri] | GCF_001625305.1 | TRADDN-NCOA6 |
| XP_019645067.1 | DED+TRADDN-NCOA6+domain1+Beta-propeller                             | 631  | LOC109485833     | chordata | Branchiostoma belcheri | PREDICTED: uncharacterized<br>protein LOC109485833<br>[Branchiostoma belcheri] | GCF_001625305.1 | TRADDN-NCOA6 |
| EEN43951.1     | DED+TRADDN-NCOA6+domain1+Beta-propeller                             | 631  | BRAFLDRAFT_87328 | chordata | Branchiostoma floridae | hypothetical protein<br>BRAFLDRAFT_87328<br>[Branchiostoma floridae]           | GCA_000003815.1 | TRADDN-NCOA6 |

| acc            | architecture                                     | len  | gen.name          | taxend   | species                | define                                                                         | gca             | clade        |
|----------------|--------------------------------------------------|------|-------------------|----------|------------------------|--------------------------------------------------------------------------------|-----------------|--------------|
| EEN59587.1     | DED+TRADDN-NCOA6+domain1+Beta-propeller          | 757  | BRAFLDRAFT_93221  | chordata | Branchiostoma floridae | hypothetical protein<br>BRAFLDRAFT_93221<br>[Branchiostoma floridae]           | GCA_000003815.1 | TRADDN-NCOA6 |
| XP_002587940.1 | DED+TRADDN-NCOA6+domain1+Beta-propeller          | 631  | BRAFLDRAFT_87328  | chordata | Branchiostoma floridae | hypothetical protein<br>BRAFLDRAFT_87328<br>[Branchiostoma floridae]           | GCF_000003815.1 | TRADDN-NCOA6 |
| XP_002603576.1 | DED+TRADDN-NCOA6+domain1+Beta-propeller          | 757  | BRAFLDRAFT_93221  | chordata | Branchiostoma floridae | hypothetical protein<br>BRAFLDRAFT_93221<br>[Branchiostoma floridae]           | GCF_000003815.1 | TRADDN-NCOA6 |
| EEN43962.1     | DED+TRADDN-NCOA6+domain1+Pro-rich                | 716  | BRAFLDRAFT_124881 | chordata | Branchiostoma floridae | hypothetical protein<br>BRAFLDRAFT_124881<br>[Branchiostoma floridae]          | GCA_000003815.1 | TRADDN-NCOA6 |
| XP_002587951.1 | DED+TRADDN-NCOA6+domain1+Pro-rich                | 716  | BRAFLDRAFT_124881 | chordata | Branchiostoma floridae | hypothetical protein<br>BRAFLDRAFT_124881<br>[Branchiostoma floridae]          | GCF_000003815.1 | TRADDN-NCOA6 |
| XP_019616863.1 | DED+TRADDN-NCOA6+domain1+Pro-rich+Beta-propeller | 742  | LOC109464356      | chordata | Branchiostoma belcheri | PREDICTED: uncharacterized<br>protein LOC109464356<br>[Branchiostoma belcheri] | GCF_001625305.1 | TRADDN-NCOA6 |
| XP_019626565.1 | DED+TRADDN-NCOA6+domain1+Pro-rich+Beta-propeller | 722  | LOC109471670      | chordata | Branchiostoma belcheri | PREDICTED: protein lin-41-like<br>[Branchiostoma belcheri]                     | GCF_001625305.1 | TRADDN-NCOA6 |
| XP_019630271.1 | DED+TRADDN-NCOA6+domain1+Pro-rich+Beta-propeller | 726  | LOC109474417      | chordata | Branchiostoma belcheri | PREDICTED: uncharacterized<br>protein LOC109474417<br>[Branchiostoma belcheri] | GCF_001625305.1 | TRADDN-NCOA6 |
| XP_019640714.1 | DED+TRADDN-NCOA6+domain1+Pro-rich+Beta-propeller | 763  | LOC109482446      | chordata | Branchiostoma belcheri | PREDICTED: uncharacterized<br>protein LOC109482446<br>[Branchiostoma belcheri] | GCF_001625305.1 | TRADDN-NCOA6 |
| XP_019642983.1 | DED+TRADDN-NCOA6+domain1+Pro-rich+Beta-propeller | 689  | LOC109484188      | chordata | Branchiostoma belcheri | PREDICTED: uncharacterized<br>protein LOC109484188<br>[Branchiostoma belcheri] | GCF_001625305.1 | TRADDN-NCOA6 |
| XP_019647870.1 | DED+TRADDN-NCOA6+domain1+Pro-rich+Beta-propeller | 716  | LOC109488153      | chordata | Branchiostoma belcheri | PREDICTED: uncharacterized<br>protein LOC109488153<br>[Branchiostoma belcheri] | GCF_001625305.1 | TRADDN-NCOA6 |
| EEN43900.1     | DED+TRADDN-NCOA6+domain1+Pro-rich+Beta-propeller | 811  | BRAFLDRAFT_87276  | chordata | Branchiostoma floridae | hypothetical protein<br>BRAFLDRAFT_87276<br>[Branchiostoma floridae]           | GCA_000003815.1 | TRADDN-NCOA6 |
| EEN43905.1     | DED+TRADDN-NCOA6+domain1+Pro-rich+Beta-propeller | 779  | BRAFLDRAFT_87282  | chordata | Branchiostoma floridae | hypothetical protein<br>BRAFLDRAFT_87282<br>[Branchiostoma floridae]           | GCA_000003815.1 | TRADDN-NCOA6 |
| EEN43906.1     | DED+TRADDN-NCOA6+domain1+Pro-rich+Beta-propeller | 854  | BRAFLDRAFT_87283  | chordata | Branchiostoma floridae | hypothetical protein<br>BRAFLDRAFT_87283<br>[Branchiostoma floridae]           | GCA_000003815.1 | TRADDN-NCOA6 |
| EEN43908.1     | DED+TRADDN-NCOA6+domain1+Pro-rich+Beta-propeller | 1220 | BRAFLDRAFT_87285  | chordata | Branchiostoma floridae | hypothetical protein<br>BRAFLDRAFT_87285<br>[Branchiostoma floridae]           | GCA_000003815.1 | TRADDN-NCOA6 |
| EEN43910.1     | DED+TRADDN-NCOA6+domain1+Pro-rich+Beta-propeller | 779  | BRAFLDRAFT_87287  | chordata | Branchiostoma floridae | hypothetical protein<br>BRAFLDRAFT_87287<br>[Branchiostoma floridae]           | GCA_000003815.1 | TRADDN-NCOA6 |
| EEN43911.1     | DED+TRADDN-NCOA6+domain1+Pro-rich+Beta-propeller | 793  | BRAFLDRAFT_87288  | chordata | Branchiostoma floridae | hypothetical protein<br>BRAFLDRAFT_87288<br>[Branchiostoma floridae]           | GCA_000003815.1 | TRADDN-NCOA6 |

| acc        | architecture                                     | len | gen.name         | taxend   | species                | define                                                               | gca             | clade        |
|------------|--------------------------------------------------|-----|------------------|----------|------------------------|----------------------------------------------------------------------|-----------------|--------------|
| EEN43912.1 | DED+TRADDN-NCOA6+domain1+Pro-rich+Beta-propeller | 783 | BRAFLDRAFT_87289 | chordata | Branchiostoma floridae | hypothetical protein<br>BRAFLDRAFT_87289<br>[Branchiostoma floridae] | GCA_000003815.1 | TRADDN-NCOA6 |
| EEN43914.1 | DED+TRADDN-NCOA6+domain1+Pro-rich+Beta-propeller | 828 | BRAFLDRAFT_87291 | chordata | Branchiostoma floridae | hypothetical protein<br>BRAFLDRAFT_87291<br>[Branchiostoma floridae] | GCA_000003815.1 | TRADDN-NCOA6 |
| EEN43915.1 | DED+TRADDN-NCOA6+domain1+Pro-rich+Beta-propeller | 792 | BRAFLDRAFT_87292 | chordata | Branchiostoma floridae | hypothetical protein<br>BRAFLDRAFT_87292<br>[Branchiostoma floridae] | GCA_000003815.1 | TRADDN-NCOA6 |
| EEN43917.1 | DED+TRADDN-NCOA6+domain1+Pro-rich+Beta-propeller | 809 | BRAFLDRAFT_87294 | chordata | Branchiostoma floridae | hypothetical protein<br>BRAFLDRAFT_87294<br>[Branchiostoma floridae] | GCA_000003815.1 | TRADDN-NCOA6 |
| EEN43920.1 | DED+TRADDN-NCOA6+domain1+Pro-rich+Beta-propeller | 792 | BRAFLDRAFT_87297 | chordata | Branchiostoma floridae | hypothetical protein<br>BRAFLDRAFT_87297<br>[Branchiostoma floridae] | GCA_000003815.1 | TRADDN-NCOA6 |
| EEN43921.1 | DED+TRADDN-NCOA6+domain1+Pro-rich+Beta-propeller | 792 | BRAFLDRAFT_87298 | chordata | Branchiostoma floridae | hypothetical protein<br>BRAFLDRAFT_87298<br>[Branchiostoma floridae] | GCA_000003815.1 | TRADDN-NCOA6 |
| EEN43922.1 | DED+TRADDN-NCOA6+domain1+Pro-rich+Beta-propeller | 729 | BRAFLDRAFT_87299 | chordata | Branchiostoma floridae | hypothetical protein<br>BRAFLDRAFT_87299<br>[Branchiostoma floridae] | GCA_000003815.1 | TRADDN-NCOA6 |
| EEN43925.1 | DED+TRADDN-NCOA6+domain1+Pro-rich+Beta-propeller | 785 | BRAFLDRAFT_87302 | chordata | Branchiostoma floridae | hypothetical protein<br>BRAFLDRAFT_87302<br>[Branchiostoma floridae] | GCA_000003815.1 | TRADDN-NCOA6 |
| EEN43929.1 | DED+TRADDN-NCOA6+domain1+Pro-rich+Beta-propeller | 764 | BRAFLDRAFT_87306 | chordata | Branchiostoma floridae | hypothetical protein<br>BRAFLDRAFT_87306<br>[Branchiostoma floridae] | GCA_000003815.1 | TRADDN-NCOA6 |
| EEN43930.1 | DED+TRADDN-NCOA6+domain1+Pro-rich+Beta-propeller | 835 | BRAFLDRAFT_87307 | chordata | Branchiostoma floridae | hypothetical protein<br>BRAFLDRAFT_87307<br>[Branchiostoma floridae] | GCA_000003815.1 | TRADDN-NCOA6 |
| EEN43931.1 | DED+TRADDN-NCOA6+domain1+Pro-rich+Beta-propeller | 800 | BRAFLDRAFT_87308 | chordata | Branchiostoma floridae | hypothetical protein<br>BRAFLDRAFT_87308<br>[Branchiostoma floridae] | GCA_000003815.1 | TRADDN-NCOA6 |
| EEN43932.1 | DED+TRADDN-NCOA6+domain1+Pro-rich+Beta-propeller | 798 | BRAFLDRAFT_87309 | chordata | Branchiostoma floridae | hypothetical protein<br>BRAFLDRAFT_87309<br>[Branchiostoma floridae] | GCA_000003815.1 | TRADDN-NCOA6 |
| EEN43935.1 | DED+TRADDN-NCOA6+domain1+Pro-rich+Beta-propeller | 724 | BRAFLDRAFT_87312 | chordata | Branchiostoma floridae | hypothetical protein<br>BRAFLDRAFT_87312<br>[Branchiostoma floridae] | GCA_000003815.1 | TRADDN-NCOA6 |
| EEN43937.1 | DED+TRADDN-NCOA6+domain1+Pro-rich+Beta-propeller | 752 | BRAFLDRAFT_87314 | chordata | Branchiostoma floridae | hypothetical protein<br>BRAFLDRAFT_87314<br>[Branchiostoma floridae] | GCA_000003815.1 | TRADDN-NCOA6 |
| EEN43938.1 | DED+TRADDN-NCOA6+domain1+Pro-rich+Beta-propeller | 791 | BRAFLDRAFT_87315 | chordata | Branchiostoma floridae | hypothetical protein<br>BRAFLDRAFT_87315<br>[Branchiostoma floridae] | GCA_000003815.1 | TRADDN-NCOA6 |
| EEN43940.1 | DED+TRADDN-NCOA6+domain1+Pro-rich+Beta-propeller | 809 | BRAFLDRAFT_87317 | chordata | Branchiostoma floridae | hypothetical protein<br>BRAFLDRAFT_87317<br>[Branchiostoma floridae] | GCA_000003815.1 | TRADDN-NCOA6 |
| EEN43942.1 | DED+TRADDN-NCOA6+domain1+Pro-rich+Beta-propeller | 815 | BRAFLDRAFT_87319 | chordata | Branchiostoma floridae | hypothetical protein<br>BRAFLDRAFT_87319<br>[Branchiostoma floridae] | GCA_000003815.1 | TRADDN-NCOA6 |

| acc            | architecture                                     | len  | gen.name         | taxend   | species                | define                                                               | gca             | clade        |
|----------------|--------------------------------------------------|------|------------------|----------|------------------------|----------------------------------------------------------------------|-----------------|--------------|
| EEN43944.1     | DED+TRADDN-NCOA6+domain1+Pro-rich+Beta-propeller | 816  | BRAFLDRAFT_87321 | chordata | Branchiostoma floridae | hypothetical protein<br>BRAFLDRAFT_87321<br>[Branchiostoma floridae] | GCA_000003815.1 | TRADDN-NCOA6 |
| EEN43945.1     | DED+TRADDN-NCOA6+domain1+Pro-rich+Beta-propeller | 818  | BRAFLDRAFT_87322 | chordata | Branchiostoma floridae | hypothetical protein<br>BRAFLDRAFT_87322<br>[Branchiostoma floridae] | GCA_000003815.1 | TRADDN-NCOA6 |
| EEN43946.1     | DED+TRADDN-NCOA6+domain1+Pro-rich+Beta-propeller | 766  | BRAFLDRAFT_87323 | chordata | Branchiostoma floridae | hypothetical protein<br>BRAFLDRAFT_87323<br>[Branchiostoma floridae] | GCA_000003815.1 | TRADDN-NCOA6 |
| EEN43947.1     | DED+TRADDN-NCOA6+domain1+Pro-rich+Beta-propeller | 705  | BRAFLDRAFT_87324 | chordata | Branchiostoma floridae | hypothetical protein<br>BRAFLDRAFT_87324<br>[Branchiostoma floridae] | GCA_000003815.1 | TRADDN-NCOA6 |
| EEN43948.1     | DED+TRADDN-NCOA6+domain1+Pro-rich+Beta-propeller | 755  | BRAFLDRAFT_87325 | chordata | Branchiostoma floridae | hypothetical protein<br>BRAFLDRAFT_87325<br>[Branchiostoma floridae] | GCA_000003815.1 | TRADDN-NCOA6 |
| EEN43950.1     | DED+TRADDN-NCOA6+domain1+Pro-rich+Beta-propeller | 857  | BRAFLDRAFT_87327 | chordata | Branchiostoma floridae | hypothetical protein<br>BRAFLDRAFT_87327<br>[Branchiostoma floridae] | GCA_000003815.1 | TRADDN-NCOA6 |
| EEN43957.1     | DED+TRADDN-NCOA6+domain1+Pro-rich+Beta-propeller | 786  | BRAFLDRAFT_87334 | chordata | Branchiostoma floridae | hypothetical protein<br>BRAFLDRAFT_87334<br>[Branchiostoma floridae] | GCA_000003815.1 | TRADDN-NCOA6 |
| EEN43959.1     | DED+TRADDN-NCOA6+domain1+Pro-rich+Beta-propeller | 774  | BRAFLDRAFT_87336 | chordata | Branchiostoma floridae | hypothetical protein<br>BRAFLDRAFT_87336<br>[Branchiostoma floridae] | GCA_000003815.1 | TRADDN-NCOA6 |
| EEN43961.1     | DED+TRADDN-NCOA6+domain1+Pro-rich+Beta-propeller | 797  | BRAFLDRAFT_87338 | chordata | Branchiostoma floridae | hypothetical protein<br>BRAFLDRAFT_87338<br>[Branchiostoma floridae] | GCA_000003815.1 | TRADDN-NCOA6 |
| EEN56723.1     | DED+TRADDN-NCOA6+domain1+Pro-rich+Beta-propeller | 740  | BRAFLDRAFT_83452 | chordata | Branchiostoma floridae | hypothetical protein<br>BRAFLDRAFT_83452<br>[Branchiostoma floridae] | GCA_000003815.1 | TRADDN-NCOA6 |
| XP_002587889.1 | DED+TRADDN-NCOA6+domain1+Pro-rich+Beta-propeller | 811  | BRAFLDRAFT_87276 | chordata | Branchiostoma floridae | hypothetical protein<br>BRAFLDRAFT_87276<br>[Branchiostoma floridae] | GCF_000003815.1 | TRADDN-NCOA6 |
| XP_002587890.1 | DED+TRADDN-NCOA6+domain1+Pro-rich+Beta-propeller | 817  | BRAFLDRAFT_87278 | chordata | Branchiostoma floridae | hypothetical protein<br>BRAFLDRAFT_87278<br>[Branchiostoma floridae] | GCF_000003815.1 | TRADDN-NCOA6 |
| XP_002587894.1 | DED+TRADDN-NCOA6+domain1+Pro-rich+Beta-propeller | 779  | BRAFLDRAFT_87282 | chordata | Branchiostoma floridae | hypothetical protein<br>BRAFLDRAFT_87282<br>[Branchiostoma floridae] | GCF_000003815.1 | TRADDN-NCOA6 |
| XP_002587895.1 | DED+TRADDN-NCOA6+domain1+Pro-rich+Beta-propeller | 854  | BRAFLDRAFT_87283 | chordata | Branchiostoma floridae | hypothetical protein<br>BRAFLDRAFT_87283<br>[Branchiostoma floridae] | GCF_000003815.1 | TRADDN-NCOA6 |
| XP_002587897.1 | DED+TRADDN-NCOA6+domain1+Pro-rich+Beta-propeller | 1220 | BRAFLDRAFT_87285 | chordata | Branchiostoma floridae | hypothetical protein<br>BRAFLDRAFT_87285<br>[Branchiostoma floridae] | GCF_000003815.1 | TRADDN-NCOA6 |
| XP_002587899.1 | DED+TRADDN-NCOA6+domain1+Pro-rich+Beta-propeller | 779  | BRAFLDRAFT_87287 | chordata | Branchiostoma floridae | hypothetical protein<br>BRAFLDRAFT_87287<br>[Branchiostoma floridae] | GCF_000003815.1 | TRADDN-NCOA6 |
| XP_002587900.1 | DED+TRADDN-NCOA6+domain1+Pro-rich+Beta-propeller | 793  | BRAFLDRAFT_87288 | chordata | Branchiostoma floridae | hypothetical protein<br>BRAFLDRAFT_87288<br>[Branchiostoma floridae] | GCF_000003815.1 | TRADDN-NCOA6 |

| acc            | architecture                                     | len | gen.name         | taxend   | species                | define                                                               | gca             | clade        |
|----------------|--------------------------------------------------|-----|------------------|----------|------------------------|----------------------------------------------------------------------|-----------------|--------------|
| XP_002587901.1 | DED+TRADDN-NCOA6+domain1+Pro-rich+Beta-propeller | 783 | BRAFLDRAFT_87289 | chordata | Branchiostoma floridae | hypothetical protein<br>BRAFLDRAFT_87289<br>[Branchiostoma floridae] | GCF_000003815.1 | TRADDN-NCOA6 |
| XP_002587903.1 | DED+TRADDN-NCOA6+domain1+Pro-rich+Beta-propeller | 828 | BRAFLDRAFT_87291 | chordata | Branchiostoma floridae | hypothetical protein<br>BRAFLDRAFT_87291<br>[Branchiostoma floridae] | GCF_000003815.1 | TRADDN-NCOA6 |
| XP_002587904.1 | DED+TRADDN-NCOA6+domain1+Pro-rich+Beta-propeller | 792 | BRAFLDRAFT_87292 | chordata | Branchiostoma floridae | hypothetical protein<br>BRAFLDRAFT_87292<br>[Branchiostoma floridae] | GCF_000003815.1 | TRADDN-NCOA6 |
| XP_002587906.1 | DED+TRADDN-NCOA6+domain1+Pro-rich+Beta-propeller | 809 | BRAFLDRAFT_87294 | chordata | Branchiostoma floridae | hypothetical protein<br>BRAFLDRAFT_87294<br>[Branchiostoma floridae] | GCF_000003815.1 | TRADDN-NCOA6 |
| XP_002587909.1 | DED+TRADDN-NCOA6+domain1+Pro-rich+Beta-propeller | 792 | BRAFLDRAFT_87297 | chordata | Branchiostoma floridae | hypothetical protein<br>BRAFLDRAFT_87297<br>[Branchiostoma floridae] | GCF_000003815.1 | TRADDN-NCOA6 |
| XP_002587910.1 | DED+TRADDN-NCOA6+domain1+Pro-rich+Beta-propeller | 792 | BRAFLDRAFT_87298 | chordata | Branchiostoma floridae | hypothetical protein<br>BRAFLDRAFT_87298<br>[Branchiostoma floridae] | GCF_000003815.1 | TRADDN-NCOA6 |
| XP_002587911.1 | DED+TRADDN-NCOA6+domain1+Pro-rich+Beta-propeller | 729 | BRAFLDRAFT_87299 | chordata | Branchiostoma floridae | hypothetical protein<br>BRAFLDRAFT_87299<br>[Branchiostoma floridae] | GCF_000003815.1 | TRADDN-NCOA6 |
| XP_002587914.1 | DED+TRADDN-NCOA6+domain1+Pro-rich+Beta-propeller | 785 | BRAFLDRAFT_87302 | chordata | Branchiostoma floridae | hypothetical protein<br>BRAFLDRAFT_87302<br>[Branchiostoma floridae] | GCF_000003815.1 | TRADDN-NCOA6 |
| XP_002587915.1 | DED+TRADDN-NCOA6+domain1+Pro-rich+Beta-propeller | 965 | BRAFLDRAFT_87303 | chordata | Branchiostoma floridae | hypothetical protein<br>BRAFLDRAFT_87303<br>[Branchiostoma floridae] | GCF_000003815.1 | TRADDN-NCOA6 |
| XP_002587918.1 | DED+TRADDN-NCOA6+domain1+Pro-rich+Beta-propeller | 764 | BRAFLDRAFT_87306 | chordata | Branchiostoma floridae | hypothetical protein<br>BRAFLDRAFT_87306<br>[Branchiostoma floridae] | GCF_000003815.1 | TRADDN-NCOA6 |
| XP_002587919.1 | DED+TRADDN-NCOA6+domain1+Pro-rich+Beta-propeller | 835 | BRAFLDRAFT_87307 | chordata | Branchiostoma floridae | hypothetical protein<br>BRAFLDRAFT_87307<br>[Branchiostoma floridae] | GCF_000003815.1 | TRADDN-NCOA6 |
| XP_002587920.1 | DED+TRADDN-NCOA6+domain1+Pro-rich+Beta-propeller | 800 | BRAFLDRAFT_87308 | chordata | Branchiostoma floridae | hypothetical protein<br>BRAFLDRAFT_87308<br>[Branchiostoma floridae] | GCF_000003815.1 | TRADDN-NCOA6 |
| XP_002587921.1 | DED+TRADDN-NCOA6+domain1+Pro-rich+Beta-propeller | 798 | BRAFLDRAFT_87309 | chordata | Branchiostoma floridae | hypothetical protein<br>BRAFLDRAFT_87309<br>[Branchiostoma floridae] | GCF_000003815.1 | TRADDN-NCOA6 |
| XP_002587924.1 | DED+TRADDN-NCOA6+domain1+Pro-rich+Beta-propeller | 724 | BRAFLDRAFT_87312 | chordata | Branchiostoma floridae | hypothetical protein<br>BRAFLDRAFT_87312<br>[Branchiostoma floridae] | GCF_000003815.1 | TRADDN-NCOA6 |
| XP_002587926.1 | DED+TRADDN-NCOA6+domain1+Pro-rich+Beta-propeller | 752 | BRAFLDRAFT_87314 | chordata | Branchiostoma floridae | hypothetical protein<br>BRAFLDRAFT_87314<br>[Branchiostoma floridae] | GCF_000003815.1 | TRADDN-NCOA6 |
| XP_002587927.1 | DED+TRADDN-NCOA6+domain1+Pro-rich+Beta-propeller | 791 | BRAFLDRAFT_87315 | chordata | Branchiostoma floridae | hypothetical protein<br>BRAFLDRAFT_87315<br>[Branchiostoma floridae] | GCF_000003815.1 | TRADDN-NCOA6 |
| XP_002587929.1 | DED+TRADDN-NCOA6+domain1+Pro-rich+Beta-propeller | 809 | BRAFLDRAFT_87317 | chordata | Branchiostoma floridae | hypothetical protein<br>BRAFLDRAFT_87317<br>[Branchiostoma floridae] | GCF_000003815.1 | TRADDN-NCOA6 |

| acc            | architecture                                                                                            | len  | gen.name         | taxend   | species                | define                                                               | gca             | clade        |
|----------------|---------------------------------------------------------------------------------------------------------|------|------------------|----------|------------------------|----------------------------------------------------------------------|-----------------|--------------|
| XP_002587931.1 | DED+TRADDN-NCOA6+domain1+Pro-rich+Beta-propeller                                                        | 815  | BRAFLDRAFT_87319 | chordata | Branchiostoma floridae | hypothetical protein<br>BRAFLDRAFT_87319                             | GCF_000003815.1 | TRADDN-NCOA6 |
| XP_002587933.1 | DED+TRADDN-NCOA6+domain1+Pro-rich+Beta-propeller                                                        | 816  | BRAFLDRAFT_87321 | chordata | Branchiostoma floridae | [Branchiostoma floridae]<br>hypothetical protein<br>BRAFLDRAFT_87321 | GCF_000003815.1 | TRADDN-NCOA6 |
| XP_002587934.1 | DED+TRADDN-NCOA6+domain1+Pro-rich+Beta-propeller                                                        | 818  | BRAFLDRAFT_87322 | chordata | Branchiostoma floridae | [Branchiostoma floridae]<br>hypothetical protein<br>BRAFLDRAFT_87322 | GCF_000003815.1 | TRADDN-NCOA6 |
| XP_002587935.1 | DED+TRADDN-NCOA6+domain1+Pro-rich+Beta-propeller                                                        | 766  | BRAFLDRAFT_87323 | chordata | Branchiostoma floridae | [Branchiostoma floridae]<br>hypothetical protein<br>BRAFLDRAFT_87323 | GCF_000003815.1 | TRADDN-NCOA6 |
| XP_002587936.1 | DED+TRADDN-NCOA6+domain1+Pro-rich+Beta-propeller                                                        | 705  | BRAFLDRAFT_87324 | chordata | Branchiostoma floridae | [Branchiostoma floridae]<br>hypothetical protein<br>BRAFLDRAFT_87324 | GCF_000003815.1 | TRADDN-NCOA6 |
| XP_002587937.1 | DED+TRADDN-NCOA6+domain1+Pro-rich+Beta-propeller                                                        | 755  | BRAFLDRAFT_87325 | chordata | Branchiostoma floridae | [Branchiostoma floridae]<br>hypothetical protein<br>BRAFLDRAFT_87325 | GCF_000003815.1 | TRADDN-NCOA6 |
| XP_002587939.1 | DED+TRADDN-NCOA6+domain1+Pro-rich+Beta-propeller                                                        | 857  | BRAFLDRAFT_87327 | chordata | Branchiostoma floridae | [Branchiostoma floridae]<br>hypothetical protein<br>BRAFLDRAFT_87327 | GCF_000003815.1 | TRADDN-NCOA6 |
| XP_002587946.1 | DED+TRADDN-NCOA6+domain1+Pro-rich+Beta-propeller                                                        | 786  | BRAFLDRAFT_87334 | chordata | Branchiostoma floridae | [Branchiostoma floridae]<br>hypothetical protein<br>BRAFLDRAFT_87334 | GCF_000003815.1 | TRADDN-NCOA6 |
| XP_002587948.1 | DED+TRADDN-NCOA6+domain1+Pro-rich+Beta-propeller                                                        | 774  | BRAFLDRAFT_87336 | chordata | Branchiostoma floridae | [Branchiostoma floridae]<br>hypothetical protein<br>BRAFLDRAFT_87336 | GCF_000003815.1 | TRADDN-NCOA6 |
| XP_002587950.1 | DED+TRADDN-NCOA6+domain1+Pro-rich+Beta-propeller                                                        | 797  | BRAFLDRAFT_87338 | chordata | Branchiostoma floridae | [Branchiostoma floridae]<br>hypothetical protein<br>BRAFLDRAFT_87338 | GCF_000003815.1 | TRADDN-NCOA6 |
| XP_002600711.1 | DED+TRADDN-NCOA6+domain1+Pro-rich+Beta-propeller                                                        | 740  | BRAFLDRAFT_83452 | chordata | Branchiostoma floridae | [Branchiostoma floridae]<br>hypothetical protein<br>BRAFLDRAFT_83452 | GCF_000003815.1 | TRADDN-NCOA6 |
| EEN43923.1     | DED+TRADDN-NCOA6+domain1+Pro-rich+Beta-propeller+DED                                                    | 898  | BRAFLDRAFT_87300 | chordata | Branchiostoma floridae | [Branchiostoma floridae]<br>hypothetical protein<br>BRAFLDRAFT_87300 | GCA_000003815.1 | TRADDN-NCOA6 |
| XP_002587912.1 | DED+TRADDN-NCOA6+domain1+Pro-rich+Beta-propeller+DED                                                    | 898  | BRAFLDRAFT_87300 | chordata | Branchiostoma floridae | [Branchiostoma floridae]<br>hypothetical protein<br>BRAFLDRAFT_87300 | GCF_000003815.1 | TRADDN-NCOA6 |
| EEN43916.1     | DED+TRADDN-NCOA6+domain1+Pro-rich+Beta-propeller+DED+Death+TRADDN-NCOA6+domain1+Pro-rich+Beta-propeller | 1751 | BRAFLDRAFT_87293 | chordata | Branchiostoma floridae | [Branchiostoma floridae]<br>hypothetical protein<br>BRAFLDRAFT_87293 | GCA_000003815.1 | TRADDN-NCOA6 |
| EEN43933.1     | DED+TRADDN-NCOA6+domain1+Pro-rich+Beta-propeller+DED+Death+TRADDN-NCOA6+domain1+Pro-rich+Beta-propeller | 1494 | BRAFLDRAFT_87310 | chordata | Branchiostoma floridae | [Branchiostoma floridae]<br>hypothetical protein<br>BRAFLDRAFT_87310 | GCA_000003815.1 | TRADDN-NCOA6 |
| XP_002587905.1 | DED+TRADDN-NCOA6+domain1+Pro-rich+Beta-propeller+DED+Death+TRADDN-NCOA6+domain1+Pro-rich+Beta-propeller | 1751 | BRAFLDRAFT_87293 | chordata | Branchiostoma floridae | [Branchiostoma floridae]<br>hypothetical protein<br>BRAFLDRAFT_87293 | GCF_000003815.1 | TRADDN-NCOA6 |
| XP_002587922.1 | DED+TRADDN-NCOA6+domain1+Pro-rich+Beta-propeller+DED+Death+TRADDN-NCOA6+domain1+Pro-rich+Beta-propeller | 1494 | BRAFLDRAFT_87310 | chordata | Branchiostoma floridae | [Branchiostoma floridae]<br>hypothetical protein<br>BRAFLDRAFT_87310 | GCF_000003815.1 | TRADDN-NCOA6 |

| acc            | architecture                                                                                                                              | len  | gen.name         | taxend   | species                | define                                                                   | gca             | clade        |
|----------------|-------------------------------------------------------------------------------------------------------------------------------------------|------|------------------|----------|------------------------|--------------------------------------------------------------------------|-----------------|--------------|
| XP_019628362.1 | DED+TRADDN-NCOA6+domain1+Pro-rich+Beta-propeller+DED+low-complexity+TRADDN-NCOA6+domain1+Pro-rich+Beta-propeller                          | 1544 | LOC109472937     | chordata | Branchiostoma belcheri | PREDICTED: uncharacterized protein LOC109472937 [Branchiostoma belcheri] | GCF_001625305.1 | TRADDN-NCOA6 |
| XP_019628363.1 | DED+TRADDN-NCOA6+domain1+Pro-rich+Beta-propeller+DED+TRADDN-NCOA6+domain1+Pro-rich+Beta-propeller                                         | 1566 | LOC109472938     | chordata | Branchiostoma belcheri | PREDICTED: uncharacterized protein LOC109472938 [Branchiostoma belcheri] | GCF_001625305.1 | TRADDN-NCOA6 |
| EEN43919.1     | DED+TRADDN-NCOA6+domain1+Pro-rich+DED+low-complexity+TRADDN-NCOA6+domain1+Pro-rich+Beta-propeller                                         | 1403 | BRAFLDRAFT_87296 | chordata | Branchiostoma floridae | hypothetical protein BRAFLDRAFT_87296 [Branchiostoma floridae]           | GCA_000003815.1 | TRADDN-NCOA6 |
| XP_002587908.1 | DED+TRADDN-NCOA6+domain1+Pro-rich+DED+low-complexity+TRADDN-NCOA6+domain1+Pro-rich+Beta-propeller                                         | 1403 | BRAFLDRAFT_87296 | chordata | Branchiostoma floridae | hypothetical protein BRAFLDRAFT_87296 [Branchiostoma floridae]           | GCF_000003815.1 | TRADDN-NCOA6 |
| EEN43964.1     | DED+TRADDN-NCOA6+domain1+Pro-rich+DED+TRADDN-NCOA6                                                                                        | 740  | BRAFLDRAFT_87341 | chordata | Branchiostoma floridae | hypothetical protein BRAFLDRAFT_87341 [Branchiostoma floridae]           | GCA_000003815.1 | TRADDN-NCOA6 |
| XP_002587953.1 | DED+TRADDN-NCOA6+domain1+Pro-rich+DED+TRADDN-NCOA6                                                                                        | 740  | BRAFLDRAFT_87341 | chordata | Branchiostoma floridae | hypothetical protein BRAFLDRAFT_87341 [Branchiostoma floridae]           | GCF_000003815.1 | TRADDN-NCOA6 |
| XP_019618784.1 | DED+TRADDN-NCOA6+domain1+Pro-rich+DED+TRADDN-NCOA6+domain1+Pro-rich+Beta-propeller                                                        | 1516 | LOC109465787     | chordata | Branchiostoma belcheri | PREDICTED: uncharacterized protein LOC109465787 [Branchiostoma belcheri] | GCF_001625305.1 | TRADDN-NCOA6 |
| EEN43953.1     | DED+TRADDN-NCOA6+domain1+Pro-rich+Pro-rich                                                                                                | 513  | BRAFLDRAFT_87330 | chordata | Branchiostoma floridae | hypothetical protein BRAFLDRAFT_87330 [Branchiostoma floridae]           | GCA_000003815.1 | TRADDN-NCOA6 |
| XP_002587942.1 | DED+TRADDN-NCOA6+domain1+Pro-rich+Pro-rich                                                                                                | 513  | BRAFLDRAFT_87330 | chordata | Branchiostoma floridae | hypothetical protein BRAFLDRAFT_87330 [Branchiostoma floridae]           | GCF_000003815.1 | TRADDN-NCOA6 |
| XP_002601333.1 | DUF1720+TRADDN-DEDD2+LRRs+ACAS_N+AMP-binding                                                                                              | 1738 | BRAFLDRAFT_82757 | chordata | Branchiostoma floridae | hypothetical protein BRAFLDRAFT_82757 [Branchiostoma floridae]           | GCF_000003815.1 | TRADDN-DEDD2 |
| XP_019635466.1 | FN3+FN3+TRADDN-DEDD2                                                                                                                      | 454  | LOC109478379     | chordata | Branchiostoma belcheri | PREDICTED: titin-like, partial [Branchiostoma belcheri]                  | GCF_001625305.1 | TRADDN-DEDD2 |
| XP_019626729.1 | FN3+FN3+TRADDN-DEDD2+Coiled-coil+Beta-propeller                                                                                           | 910  | LOC109471815     | chordata | Branchiostoma belcheri | PREDICTED: uncharacterized protein LOC109471815 [Branchiostoma belcheri] | GCF_001625305.1 | TRADDN-DEDD2 |
| XP_002598013.1 | FN3+FN3+TRADDN-DEDD2+Coiled-coil+Death+Trypsin                                                                                            | 864  | BRAFLDRAFT_79761 | chordata | Branchiostoma floridae | hypothetical protein BRAFLDRAFT_79761 [Branchiostoma floridae]           | GCF_000003815.1 | TRADDN-DEDD2 |
| XP_002607644.1 | GT4-GTase+Coiled-coil+Death+TRADDN-DEDD2+Beta-propeller+Death+Death+Death+zf-C2H2+zf-C2H2+zf-C2H2+zf-C2H2+zf-C2H2+zf-C2H2+zf-C2H2+zf-C2H2 | 3703 | BRAFLDRAFT_84667 | chordata | Branchiostoma floridae | hypothetical protein BRAFLDRAFT_84667 [Branchiostoma floridae]           | GCF_000003815.1 | TRADDN-DEDD2 |
| XP_019616577.1 | GT4-GTase+TRADDN-DEDD2                                                                                                                    | 575  | LOC109464089     | chordata | Branchiostoma belcheri | PREDICTED: uncharacterized protein LOC109464089 [Branchiostoma belcheri] | GCF_001625305.1 | TRADDN-DEDD2 |
| XP_019626675.1 | GT4-GTase+TRADDN-DEDD2                                                                                                                    | 569  | LOC109471761     | chordata | Branchiostoma belcheri | PREDICTED: uncharacterized protein LOC109471761 [Branchiostoma belcheri] | GCF_001625305.1 | TRADDN-DEDD2 |
| XP_019635472.1 | GT4-GTase+TRADDN-DEDD2                                                                                                                    | 642  | LOC109478386     | chordata | Branchiostoma belcheri | PREDICTED: uncharacterized protein LOC109478386 [Branchiostoma belcheri] | GCF_001625305.1 | TRADDN-DEDD2 |



| acc            | architecture                                  | len  | gen.name         | taxend   | species                | define                                                                                                 | gca             | clade        |
|----------------|-----------------------------------------------|------|------------------|----------|------------------------|--------------------------------------------------------------------------------------------------------|-----------------|--------------|
| XP_002606956.1 | GT4-GTase+TRADDN-DEDD2                        | 718  | BRAFLDRAFT_64952 | chordata | Branchiostoma floridae | hypothetical protein<br>BRAFLDRAFT_64952<br>[Branchiostoma floridae]                                   | GCF_000003815.1 | TRADDN-DEDD2 |
| XP_019626189.1 | GT4-GTase+TRADDN-DEDD2+Ankyrin                | 856  | LOC109471342     | chordata | Branchiostoma belcheri | PREDICTED: uncharacterized<br>protein LOC109471342<br>[Branchiostoma belcheri]                         | GCF_001625305.1 | TRADDN-DEDD2 |
| XP_019641871.1 | GT4-GTase+TRADDN-DEDD2+Ankyrin                | 812  | LOC109483324     | chordata | Branchiostoma belcheri | PREDICTED: uncharacterized<br>protein LOC109483324<br>[Branchiostoma belcheri]                         | GCF_001625305.1 | TRADDN-DEDD2 |
| XP_019644604.1 | GT4-GTase+TRADDN-DEDD2+Beta-propeller         | 1071 | LOC109485438     | chordata | Branchiostoma belcheri | PREDICTED: uncharacterized<br>protein LOC109485438<br>[Branchiostoma belcheri]                         | GCF_001625305.1 | TRADDN-DEDD2 |
| XP_002606063.1 | GT4-GTase+TRADDN-DEDD2+Coiled-coil+GTPase-AIG | 1278 | BRAFLDRAFT_92082 | chordata | Branchiostoma floridae | hypothetical protein<br>BRAFLDRAFT_92082<br>[Branchiostoma floridae]                                   | GCF_000003815.1 | TRADDN-DEDD2 |
| XP_002606060.1 | GT4-GTase+TRADDN-DEDD2+DED+DED+DED+DED        | 1082 | BRAFLDRAFT_92079 | chordata | Branchiostoma floridae | hypothetical protein<br>BRAFLDRAFT_92079<br>[Branchiostoma floridae]                                   | GCF_000003815.1 | TRADDN-DEDD2 |
| XP_019616531.1 | GT4-GTase+TRADDN-DEDD2+P-loop-NTPase          | 960  | LOC109464048     | chordata | Branchiostoma belcheri | PREDICTED: uncharacterized<br>protein LOC109464048<br>[Branchiostoma belcheri]                         | GCF_001625305.1 | TRADDN-DEDD2 |
| XP_019620789.1 | GT4-GTase+TRADDN-DEDD2+TPRs                   | 1532 | LOC109467286     | chordata | Branchiostoma belcheri | PREDICTED: uncharacterized<br>protein LOC109467286<br>[Branchiostoma belcheri]                         | GCF_001625305.1 | TRADDN-DEDD2 |
| XP_019633153.1 | GT4-GTase+TRADDN-DEDD2+TPRs                   | 1184 | LOC109476602     | chordata | Branchiostoma belcheri | PREDICTED: LOW QUALITY<br>PROTEIN: uncharacterized protein<br>LOC109476602 [Branchiostoma<br>belcheri] | GCF_001625305.1 | TRADDN-DEDD2 |
| XP_019636955.1 | GT4-GTase+TRADDN-DEDD2+TPRs                   | 1131 | LOC109479430     | chordata | Branchiostoma belcheri | PREDICTED: uncharacterized<br>protein LOC109479430<br>[Branchiostoma belcheri]                         | GCF_001625305.1 | TRADDN-DEDD2 |
| XP_019640556.1 | GT4-GTase+TRADDN-DEDD2+TPRs                   | 1537 | LOC109482313     | chordata | Branchiostoma belcheri | PREDICTED: uncharacterized<br>protein LOC109482313<br>[Branchiostoma belcheri]                         | GCF_001625305.1 | TRADDN-DEDD2 |
| XP_019640557.1 | GT4-GTase+TRADDN-DEDD2+TPRs                   | 1507 | LOC109482314     | chordata | Branchiostoma belcheri | PREDICTED: uncharacterized<br>protein LOC109482314<br>[Branchiostoma belcheri]                         | GCF_001625305.1 | TRADDN-DEDD2 |
| XP_019640558.1 | GT4-GTase+TRADDN-DEDD2+TPRs                   | 1607 | LOC109482316     | chordata | Branchiostoma belcheri | PREDICTED: LOW QUALITY<br>PROTEIN: uncharacterized protein<br>LOC109482316 [Branchiostoma<br>belcheri] | GCF_001625305.1 | TRADDN-DEDD2 |
| XP_019646023.1 | GT4-GTase+TRADDN-DEDD2+TPRs                   | 1345 | LOC109486599     | chordata | Branchiostoma belcheri | PREDICTED: tetratricopeptide<br>repeat protein 28-like, partial<br>[Branchiostoma belcheri]            | GCF_001625305.1 | TRADDN-DEDD2 |
| XP_002599992.1 | GT4-GTase+TRADDN-DEDD2+TPRs                   | 1404 | BRAFLDRAFT_74113 | chordata | Branchiostoma floridae | hypothetical protein<br>BRAFLDRAFT_74113<br>[Branchiostoma floridae]                                   | GCF_000003815.1 | TRADDN-DEDD2 |
| XP_002589321.1 | HEPN+Death+Death+TRADDN-DEDD2+Death+LRRs      | 1432 | BRAFLDRAFT_77774 | chordata | Branchiostoma floridae | hypothetical protein<br>BRAFLDRAFT_77774<br>[Branchiostoma floridae]                                   | GCF_000003815.1 | TRADDN-DEDD2 |

| acc            | architecture                                                          | len  | gen.name          | taxend   | species                | define                                                                                                 | gca             | clade                     |
|----------------|-----------------------------------------------------------------------|------|-------------------|----------|------------------------|--------------------------------------------------------------------------------------------------------|-----------------|---------------------------|
| XP_002610714.1 | low-complexity+DED+TRADDN-DEDD2                                       | 299  | BRAFLDRAFT_202645 | chordata | Branchiostoma floridae | hypothetical protein<br>BRAFLDRAFT_202645<br>[Branchiostoma floridae]                                  | GCF_000003815.1 | TRADDN-DEDD2              |
| XP_002606802.1 | LRRs+CARD+Death+TRADDN-DEDD2                                          | 692  | BRAFLDRAFT_82441  | chordata | Branchiostoma floridae | hypothetical protein<br>BRAFLDRAFT_82441<br>[Branchiostoma floridae]                                   | GCF_000003815.1 | TRADDN-DEDD2              |
| XP_019614048.1 | N-ter+TRADDN-Bac+FAM124                                               | 417  | LOC109462003      | chordata | Branchiostoma belcheri | PREDICTED: uncharacterized<br>protein LOC109462003<br>[Branchiostoma belcheri]                         | GCF_001625305.1 | TRADDN-Bacterial-<br>like |
| EEN44785.1     | N-ter+TRADDN-Bac+FAM124                                               | 416  | BRAFLDRAFT_89797  | chordata | Branchiostoma floridae | hypothetical protein<br>BRAFLDRAFT_89797<br>[Branchiostoma floridae]                                   | GCA_000003815.1 | TRADDN-Bacterial-<br>like |
| EEN44794.1     | N-ter+TRADDN-Bac+FAM124                                               | 392  | BRAFLDRAFT_89787  | chordata | Branchiostoma floridae | hypothetical protein<br>BRAFLDRAFT_89787<br>[Branchiostoma floridae]                                   | GCA_000003815.1 | TRADDN-Bacterial-<br>like |
| XP_002588774.1 | N-ter+TRADDN-Bac+FAM124                                               | 416  | BRAFLDRAFT_89797  | chordata | Branchiostoma floridae | hypothetical protein<br>BRAFLDRAFT_89797<br>[Branchiostoma floridae]                                   | GCF_000003815.1 | TRADDN-Bacterial-<br>like |
| XP_002588783.1 | N-ter+TRADDN-Bac+FAM124                                               | 392  | BRAFLDRAFT_89787  | chordata | Branchiostoma floridae | hypothetical protein<br>BRAFLDRAFT_89787<br>[Branchiostoma floridae]                                   | GCF_000003815.1 | TRADDN-Bacterial-<br>like |
| XP_002611490.1 | RING+TIR+TRADDN-DEDD2+Coiled-coil+GTPase-AIG                          | 899  | BRAFLDRAFT_63875  | chordata | Branchiostoma floridae | hypothetical protein<br>BRAFLDRAFT_63875<br>[Branchiostoma floridae]                                   | GCF_000003815.1 | TRADDN-DEDD2              |
| XP_002592407.1 | RRM+RRM+FN3+TRADDN-DEDD2+Coiled-coil+DnaJ_CXXCXGXG+DnaJ_C+SH2+Pkinase | 1558 | BRAFLDRAFT_118420 | chordata | Branchiostoma floridae | hypothetical protein<br>BRAFLDRAFT_118420<br>[Branchiostoma floridae]                                  | GCF_000003815.1 | TRADDN-DEDD2              |
| XP_019632330.1 | TIR+TRADDN-DEDD2+CARD+STAND+wHTH+helical-repeat+LRRs                  | 1367 | LOC109475966      | chordata | Branchiostoma belcheri | PREDICTED: uncharacterized<br>protein LOC109475966<br>[Branchiostoma belcheri]                         | GCF_001625305.1 | TRADDN-DEDD2              |
| XP_019616027.1 | TIR+TRADDN-DEDD2+Coiled-coil                                          | 536  | LOC109463615      | chordata | Branchiostoma belcheri | PREDICTED: uncharacterized<br>protein LOC109463615<br>[Branchiostoma belcheri]                         | GCF_001625305.1 | TRADDN-DEDD2              |
| XP_002600337.1 | TIR+TRADDN-DEDD2+Coiled-coil+NTP_transf                               | 1092 | BRAFLDRAFT_66570  | chordata | Branchiostoma floridae | hypothetical protein<br>BRAFLDRAFT_66570<br>[Branchiostoma floridae]                                   | GCF_000003815.1 | TRADDN-DEDD2              |
| XP_019643131.1 | TIR+TRADDN-DEDD2+DEAD+RNA-receptor_SF2-helicase+RIG-I_C-RD            | 1021 | LOC109484316      | chordata | Branchiostoma belcheri | PREDICTED: probable<br>ATP-dependent RNA helicase<br>DHX58 [Branchiostoma belcheri]                    | GCF_001625305.1 | TRADDN-DEDD2              |
| XP_019635553.1 | TIR+TRADDN-DEDD2+DED+STAND+wHTH+TPRs                                  | 1266 | LOC109478460      | chordata | Branchiostoma belcheri | PREDICTED: LOW QUALITY<br>PROTEIN: uncharacterized protein<br>LOC109478460 [Branchiostoma<br>belcheri] | GCF_001625305.1 | TRADDN-DEDD2              |
| XP_002607394.1 | TM+TM+TRADDN-DEDD2                                                    | 576  | BRAFLDRAFT_69805  | chordata | Branchiostoma floridae | hypothetical protein<br>BRAFLDRAFT_69805<br>[Branchiostoma floridae]                                   | GCF_000003815.1 | TRADDN-DEDD2              |
| XP_019613650.1 | TRADDN-DEDD2                                                          | 279  | LOC109461702      | chordata | Branchiostoma belcheri | PREDICTED: uncharacterized<br>protein LOC109461702 isoform X3<br>[Branchiostoma belcheri]              | GCF_001625305.1 | TRADDN-DEDD2              |
| XP_019623524.1 | TRADDN-DEDD2                                                          | 264  | LOC109469171      | chordata | Branchiostoma belcheri | PREDICTED: uncharacterized<br>protein LOC109469171<br>[Branchiostoma belcheri]                         | GCF_001625305.1 | TRADDN-DEDD2              |

| acc            | architecture                                                | len  | gen.name          | taxend   | species                | define                                                                              | gca             | clade        |
|----------------|-------------------------------------------------------------|------|-------------------|----------|------------------------|-------------------------------------------------------------------------------------|-----------------|--------------|
| XP_019633455.1 | TRADDN-DEDD2                                                | 454  | LOC109476880      | chordata | Branchiostoma belcheri | PREDICTED: uncharacterized protein LOC109476880 [Branchiostoma belcheri]            | GCF_001625305.1 | TRADDN-DEDD2 |
| XP_019633520.1 | TRADDN-DEDD2                                                | 293  | LOC109476943      | chordata | Branchiostoma belcheri | PREDICTED: uncharacterized protein LOC109476943 [Branchiostoma belcheri]            | GCF_001625305.1 | TRADDN-DEDD2 |
| XP_019642703.1 | TRADDN-DEDD2                                                | 205  | LOC109483987      | chordata | Branchiostoma belcheri | PREDICTED: death effector domain-containing protein-like [Branchiostoma belcheri]   | GCF_001625305.1 | TRADDN-DEDD2 |
| XP_019645723.1 | TRADDN-DEDD2                                                | 225  | LOC109486339      | chordata | Branchiostoma belcheri | PREDICTED: uncharacterized protein LOC109486339 [Branchiostoma belcheri]            | GCF_001625305.1 | TRADDN-DEDD2 |
| XP_002586220.1 | TRADDN-DEDD2                                                | 247  | BRAFLDRAFT_132418 | chordata | Branchiostoma floridae | hypothetical protein BRAFLDRAFT_132418, partial [Branchiostoma floridae]            | GCF_000003815.1 | TRADDN-DEDD2 |
| XP_002592365.1 | TRADDN-DEDD2                                                | 234  | BRAFLDRAFT_131341 | chordata | Branchiostoma floridae | hypothetical protein BRAFLDRAFT_131341 [Branchiostoma floridae]                     | GCF_000003815.1 | TRADDN-DEDD2 |
| XP_002601760.1 | TRADDN-DEDD2                                                | 496  | BRAFLDRAFT_76020  | chordata | Branchiostoma floridae | hypothetical protein BRAFLDRAFT_76020 [Branchiostoma floridae]                      | GCF_000003815.1 | TRADDN-DEDD2 |
| XP_002604763.1 | TRADDN-DEDD2                                                | 347  | BRAFLDRAFT_119471 | chordata | Branchiostoma floridae | hypothetical protein BRAFLDRAFT_119471 [Branchiostoma floridae]                     | GCF_000003815.1 | TRADDN-DEDD2 |
| XP_002586223.1 | TRADDN-DEDD2+ADH_zinc_N+ADH_zinc_N                          | 496  | BRAFLDRAFT_109550 | chordata | Branchiostoma floridae | hypothetical protein BRAFLDRAFT_109550 [Branchiostoma floridae]                     | GCF_000003815.1 | TRADDN-DEDD2 |
| XP_019616149.1 | TRADDN-DEDD2+Ankyrin                                        | 405  | LOC109463743      | chordata | Branchiostoma belcheri | PREDICTED: ankyrin repeat domain-containing protein 2-like [Branchiostoma belcheri] | GCF_001625305.1 | TRADDN-DEDD2 |
| XP_002598015.1 | TRADDN-DEDD2+Coiled-coil                                    | 482  | BRAFLDRAFT_79759  | chordata | Branchiostoma floridae | hypothetical protein BRAFLDRAFT_79759 [Branchiostoma floridae]                      | GCF_000003815.1 | TRADDN-DEDD2 |
| XP_002605447.1 | TRADDN-DEDD2+Coiled-coil+GT4-GTase                          | 734  | BRAFLDRAFT_74262  | chordata | Branchiostoma floridae | hypothetical protein BRAFLDRAFT_74262 [Branchiostoma floridae]                      | GCF_000003815.1 | TRADDN-DEDD2 |
| XP_002592356.1 | TRADDN-DEDD2+DED+STAND+wHTH+helical-region+TPRs+Coiled-coil | 1531 | BRAFLDRAFT_101242 | chordata | Branchiostoma floridae | hypothetical protein BRAFLDRAFT_101242 [Branchiostoma floridae]                     | GCF_000003815.1 | TRADDN-DEDD2 |
| XP_019621030.1 | TRADDN-DEDD2+FN3+Pkinase+CASPASE                            | 1165 | LOC109467467      | chordata | Branchiostoma belcheri | PREDICTED: uncharacterized protein LOC109467467 isoform X1 [Branchiostoma belcheri] | GCF_001625305.1 | TRADDN-DEDD2 |
| XP_019621031.1 | TRADDN-DEDD2+FN3+Pkinase+CASPASE                            | 1163 | LOC109467467      | chordata | Branchiostoma belcheri | PREDICTED: uncharacterized protein LOC109467467 isoform X2 [Branchiostoma belcheri] | GCF_001625305.1 | TRADDN-DEDD2 |
| XP_019621032.1 | TRADDN-DEDD2+FN3+Pkinase+CASPASE                            | 1161 | LOC109467467      | chordata | Branchiostoma belcheri | PREDICTED: uncharacterized protein LOC109467467 isoform X3 [Branchiostoma belcheri] | GCF_001625305.1 | TRADDN-DEDD2 |
| XP_019621033.1 | TRADDN-DEDD2+FN3+Pkinase+CASPASE                            | 1157 | LOC109467467      | chordata | Branchiostoma belcheri | PREDICTED: uncharacterized protein LOC109467467 isoform X4 [Branchiostoma belcheri] | GCF_001625305.1 | TRADDN-DEDD2 |

| acc            | architecture                       | len  | gen.name          | taxend   | species                | define                                                                                  | gca             | clade        |
|----------------|------------------------------------|------|-------------------|----------|------------------------|-----------------------------------------------------------------------------------------|-----------------|--------------|
| XP_019614641.1 | TRADDN-DEDD2+GTPase-AIG            | 620  | LOC109462531      | chordata | Branchiostoma belcheri | PREDICTED: uncharacterized protein LOC109462531 [Branchiostoma belcheri]                | GCF_001625305.1 | TRADDN-DEDD2 |
| XP_019624508.1 | TRADDN-DEDD2+GTPase-AIG+GTPase-AIG | 762  | LOC109470168      | chordata | Branchiostoma belcheri | PREDICTED: GTPase IMAP family member 8-like [Branchiostoma belcheri]                    | GCF_001625305.1 | TRADDN-DEDD2 |
| XP_019622962.1 | TRADDN-DEDD2+LRRs                  | 650  | LOC109469014      | chordata | Branchiostoma belcheri | PREDICTED: uncharacterized protein LOC109469014 [Branchiostoma belcheri]                | GCF_001625305.1 | TRADDN-DEDD2 |
| XP_002603206.1 | TRADDN-DEDD2+LRRs                  | 637  | BRAFLDRAFT_93392  | chordata | Branchiostoma floridae | hypothetical protein BRAFLDRAFT_93392 [Branchiostoma floridae]                          | GCF_000003815.1 | TRADDN-DEDD2 |
| XP_019637544.1 | TRADDN-DEDD2+NYN+ZBD+ZBD+ZBD       | 713  | LOC109479923      | chordata | Branchiostoma belcheri | PREDICTED: uncharacterized protein LOC109479923 [Branchiostoma belcheri]                | GCF_001625305.1 | TRADDN-DEDD2 |
| XP_019624418.1 | TRADDN-DEDD2+PARP                  | 688  | LOC109470081      | chordata | Branchiostoma belcheri | PREDICTED: poly [ADP-ribose] polymerase 14-like [Branchiostoma belcheri]                | GCF_001625305.1 | TRADDN-DEDD2 |
| XP_019621996.1 | TRADDN-DEDD2+TM                    | 535  | LOC109468182      | chordata | Branchiostoma belcheri | PREDICTED: uncharacterized protein LOC109468182 [Branchiostoma belcheri]                | GCF_001625305.1 | TRADDN-DEDD2 |
| XP_019633154.1 | TRADDN-DEDD2+TPRs                  | 878  | LOC109476604      | chordata | Branchiostoma belcheri | PREDICTED: tetratricopeptide repeat protein 28-like [Branchiostoma belcheri]            | GCF_001625305.1 | TRADDN-DEDD2 |
| XP_019633157.1 | TRADDN-DEDD2+TPRs                  | 1175 | LOC109476607      | chordata | Branchiostoma belcheri | PREDICTED: tetratricopeptide repeat protein 28-like [Branchiostoma belcheri]            | GCF_001625305.1 | TRADDN-DEDD2 |
| XP_019635475.1 | TRADDN-DEDD2+TPRs                  | 828  | LOC109478387      | chordata | Branchiostoma belcheri | PREDICTED: tetratricopeptide repeat protein 28-like isoform X1 [Branchiostoma belcheri] | GCF_001625305.1 | TRADDN-DEDD2 |
| XP_019635476.1 | TRADDN-DEDD2+TPRs                  | 763  | LOC109478387      | chordata | Branchiostoma belcheri | PREDICTED: tetratricopeptide repeat protein 28-like isoform X2 [Branchiostoma belcheri] | GCF_001625305.1 | TRADDN-DEDD2 |
| XP_019613648.1 | TRADDN-DEDD2+Trypsin               | 864  | LOC109461702      | chordata | Branchiostoma belcheri | PREDICTED: uncharacterized protein LOC109461702 isoform X1 [Branchiostoma belcheri]     | GCF_001625305.1 | TRADDN-DEDD2 |
| XP_019613649.1 | TRADDN-DEDD2+Trypsin               | 863  | LOC109461702      | chordata | Branchiostoma belcheri | PREDICTED: uncharacterized protein LOC109461702 isoform X2 [Branchiostoma belcheri]     | GCF_001625305.1 | TRADDN-DEDD2 |
| EEN51213.1     | TRADDN-NCOA6                       | 72   | BRAFLDRAFT_238710 | chordata | Branchiostoma floridae | hypothetical protein BRAFLDRAFT_238710, partial [Branchiostoma floridae]                | GCA_000003815.1 | TRADDN-NCOA6 |
| XP_002595201.1 | TRADDN-NCOA6                       | 72   | BRAFLDRAFT_238710 | chordata | Branchiostoma floridae | hypothetical protein BRAFLDRAFT_238710, partial [Branchiostoma floridae]                | GCF_000003815.1 | TRADDN-NCOA6 |
| XP_009860299.2 | TRADDN-NCOA6                       | 650  | LOC100179823      | chordata | Ciona intestinalis     | nuclear receptor coactivator 6 [Ciona intestinalis]                                     | GCF_000224145.3 | TRADDN-NCOA6 |
| EEN43927.1     | TRADDN-NCOA6+Coiled-coil           | 180  | BRAFLDRAFT_87304  | chordata | Branchiostoma floridae | hypothetical protein BRAFLDRAFT_87304 [Branchiostoma floridae]                          | GCA_000003815.1 | TRADDN-NCOA6 |

| acc            | architecture                                 | len | gen.name          | taxend     | species                    | define                                                                                                      | gca             | clade        |
|----------------|----------------------------------------------|-----|-------------------|------------|----------------------------|-------------------------------------------------------------------------------------------------------------|-----------------|--------------|
| XP_002587916.1 | TRADDN-NCOA6+Coiled-coil                     | 180 | BRAFLDRAFT_87304  | chordata   | Branchiostoma floridae     | hypothetical protein<br>BRAFLDRAFT_87304<br>[Branchiostoma floridae]                                        | GCF_000003815.1 | TRADDN-NCOA6 |
| EEN61321.1     | TRADDN-NCOA6+domain1+Pro-rich+Beta-propeller | 599 | BRAFLDRAFT_89047  | chordata   | Branchiostoma floridae     | hypothetical protein<br>BRAFLDRAFT_89047<br>[Branchiostoma floridae]                                        | GCA_000003815.1 | TRADDN-NCOA6 |
| EEN61323.1     | TRADDN-NCOA6+domain1+Pro-rich+Beta-propeller | 535 | BRAFLDRAFT_89045  | chordata   | Branchiostoma floridae     | hypothetical protein<br>BRAFLDRAFT_89045<br>[Branchiostoma floridae]                                        | GCA_000003815.1 | TRADDN-NCOA6 |
| XP_002605311.1 | TRADDN-NCOA6+domain1+Pro-rich+Beta-propeller | 599 | BRAFLDRAFT_89047  | chordata   | Branchiostoma floridae     | hypothetical protein<br>BRAFLDRAFT_89047<br>[Branchiostoma floridae]                                        | GCF_000003815.1 | TRADDN-NCOA6 |
| XP_002605313.1 | TRADDN-NCOA6+domain1+Pro-rich+Beta-propeller | 535 | BRAFLDRAFT_89045  | chordata   | Branchiostoma floridae     | hypothetical protein<br>BRAFLDRAFT_89045<br>[Branchiostoma floridae]                                        | GCF_000003815.1 | TRADDN-NCOA6 |
| XP_019620330.1 | TRADDN-NCOA6+low-complexity                  | 690 | LOC109466905      | chordata   | Branchiostoma belcheri     | PREDICTED: extensin-like, partial<br>[Branchiostoma belcheri]                                               | GCF_001625305.1 | TRADDN-NCOA6 |
| XP_005031341.1 | DED+TRADDN-DEDD2                             | 266 | LOC101796850      | vertebrata | Anas platyrhynchos         | LOW QUALITY PROTEIN: death<br>effector domain-containing<br>protein-like, partial [Anas<br>platyrhynchos]   | -               | TRADDN-DEDD2 |
| OWK05416.1     | DED+TRADDN-DEDD2                             | 216 | Celaphus_00001791 | vertebrata | Cervus elaphus hippelaphus | DEDD [Cervus elaphus hippelaphus]                                                                           | GCA_002197005.1 | TRADDN-DEDD2 |
| RMB93944.1     | DED+TRADDN-DEDD2                             | 307 | DUI87_29680       | vertebrata | Hirundo rustica rustica    | hypothetical protein DUI87_29680<br>[Hirundo rustica rustica]                                               | GCA_003692655.1 | TRADDN-DEDD2 |
| XP_020665928.1 | DED+TRADDN-DEDD2                             | 250 | DEDD              | vertebrata | Pogona vitticeps           | death effector domain-containing<br>protein [Pogona vitticeps]                                              | GCF_900067755.1 | TRADDN-DEDD2 |
| XP_025214527.1 | DED+TRADDN-DEDD2                             | 319 | DEDD              | vertebrata | Theropithecus gelada       | death effector domain-containing<br>protein isoform X1 [Theropithecus<br>gelada]                            | GCF_003255815.1 | TRADDN-DEDD2 |
| XP_014166987.1 | ERM+TRADDN-DEDD2                             | 363 | LOC102033576      | vertebrata | Geospiza fortis            | PREDICTED: uncharacterized<br>protein LOC102033576 [Geospiza<br>fortis]                                     | -               | TRADDN-DEDD2 |
| EMP27985.1     | Ig+DED+TRADDN-DEDD2                          | 451 | UY3_14962         | vertebrata | Chelonia mydas             | Death effector domain-containing<br>protein [Chelonia mydas]                                                | GCA_000344595.1 | TRADDN-DEDD2 |
| XP_026893437.1 | low-complexity+DED+TRADDN-DEDD2              | 327 | DEDD2             | vertebrata | Acinonyx jubatus           | DNA-binding death effector<br>domain-containing protein 2<br>[Acinonyx jubatus]                             | GCF_003709585.1 | TRADDN-DEDD2 |
| XP_002923987.1 | low-complexity+DED+TRADDN-DEDD2              | 327 | DEDD2             | vertebrata | Ailuropoda melanoleuca     | PREDICTED: DNA-binding death<br>effector domain-containing protein 2<br>isoform X3 [Ailuropoda melanoleuca] | GCF_000004335.2 | TRADDN-DEDD2 |
| XP_002928789.1 | low-complexity+DED+TRADDN-DEDD2              | 318 | DEDD              | vertebrata | Ailuropoda melanoleuca     | PREDICTED: death effector<br>domain-containing protein<br>[Ailuropoda melanoleuca]                          | GCF_000004335.2 | TRADDN-DEDD2 |
| XP_019660119.1 | low-complexity+DED+TRADDN-DEDD2              | 358 | DEDD2             | vertebrata | Ailuropoda melanoleuca     | PREDICTED: DNA-binding death<br>effector domain-containing protein 2<br>isoform X1 [Ailuropoda melanoleuca] | GCF_000004335.2 | TRADDN-DEDD2 |
| XP_019660120.1 | low-complexity+DED+TRADDN-DEDD2              | 335 | DEDD2             | vertebrata | Ailuropoda melanoleuca     | PREDICTED: DNA-binding death<br>effector domain-containing protein 2<br>isoform X2 [Ailuropoda melanoleuca] | GCF_000004335.2 | TRADDN-DEDD2 |
| KYO27160.1     | low-complexity+DED+TRADDN-DEDD2              | 362 | DEDD              | vertebrata | Alligator mississippiensis | death effector domain-containing<br>protein isoform B [Alligator<br>mississippiensis]                       | GCA_000281125.4 | TRADDN-DEDD2 |

| acc            | architecture                    | len | gen.name   | taxend     | species                             | define                                                                                                  | gca             | clade        |
|----------------|---------------------------------|-----|------------|------------|-------------------------------------|---------------------------------------------------------------------------------------------------------|-----------------|--------------|
| KYO30372.1     | low-complexity+DED+TRADDN-DEDD2 | 335 | DEDD2      | vertebrata | Alligator mississippiensis          | DNA-binding death effector domain-containing protein 2 [Alligator mississippiensis]                     | GCA_000281125.4 | TRADDN-DEDD2 |
| XP_006270333.1 | low-complexity+DED+TRADDN-DEDD2 | 323 | DEDD2      | vertebrata | Alligator mississippiensis          | PREDICTED: DNA-binding death effector domain-containing protein 2 [Alligator mississippiensis]          | GCF_000281125.3 | TRADDN-DEDD2 |
| XP_006032777.1 | low-complexity+DED+TRADDN-DEDD2 | 318 | DEDD       | vertebrata | Alligator sinensis                  | death effector domain-containing protein isoform X1 [Alligator sinensis]                                | GCF_000455745.1 | TRADDN-DEDD2 |
| XP_006038909.1 | low-complexity+DED+TRADDN-DEDD2 | 323 | DEDD2      | vertebrata | Alligator sinensis                  | DNA-binding death effector domain-containing protein 2 isoform X1 [Alligator sinensis]                  | GCF_000455745.1 | TRADDN-DEDD2 |
| XP_025070243.1 | low-complexity+DED+TRADDN-DEDD2 | 282 | DEDD       | vertebrata | Alligator sinensis                  | death effector domain-containing protein isoform X2 [Alligator sinensis]                                | GCF_000455745.1 | TRADDN-DEDD2 |
| KQK85160.1     | low-complexity+DED+TRADDN-DEDD2 | 391 | AAES_42378 | vertebrata | Amazona aestiva                     | death effector domain-containing protein [Amazona aestiva]                                              | GCA_001420675.1 | TRADDN-DEDD2 |
| XP_003229451.2 | low-complexity+DED+TRADDN-DEDD2 | 439 | dedd2      | vertebrata | Anolis carolinensis                 | PREDICTED: DNA-binding death effector domain-containing protein 2 [Anolis carolinensis]                 | GCF_000090745.1 | TRADDN-DEDD2 |
| XP_008122491.1 | low-complexity+DED+TRADDN-DEDD2 | 401 | dedd       | vertebrata | Anolis carolinensis                 | PREDICTED: death effector domain-containing protein [Anolis carolinensis]                               | GCF_000090745.1 | TRADDN-DEDD2 |
| XP_021526089.1 | low-complexity+DED+TRADDN-DEDD2 | 326 | DEDD2      | vertebrata | Aotus nancymaae                     | DNA-binding death effector domain-containing protein 2 [Aotus nancymaae]                                | GCF_000952055.2 | TRADDN-DEDD2 |
| KFM08834.1     | low-complexity+DED+TRADDN-DEDD2 | 323 | AS27_07638 | vertebrata | Aptenodytes forsteri                | Death effector domain-containing protein [Aptenodytes forsteri]                                         | GCA_000699145.1 | TRADDN-DEDD2 |
| XP_009279519.1 | low-complexity+DED+TRADDN-DEDD2 | 325 | DEDD       | vertebrata | Aptenodytes forsteri                | PREDICTED: death effector domain-containing protein [Aptenodytes forsteri]                              | GCF_000699145.1 | TRADDN-DEDD2 |
| XP_013808421.1 | low-complexity+DED+TRADDN-DEDD2 | 318 | DEDD       | vertebrata | Apteryx australis mantelli          | PREDICTED: death effector domain-containing protein [Apteryx australis mantelli]                        | GCF_001039765.1 | TRADDN-DEDD2 |
| XP_007168099.1 | low-complexity+DED+TRADDN-DEDD2 | 327 | DEDD2      | vertebrata | Balaenoptera acutorostrata scammoni | PREDICTED: DNA-binding death effector domain-containing protein 2 [Balaenoptera acutorostrata scammoni] | GCF_000493695.1 | TRADDN-DEDD2 |
| XP_007171792.1 | low-complexity+DED+TRADDN-DEDD2 | 275 | DEDD       | vertebrata | Balaenoptera acutorostrata scammoni | PREDICTED: death effector domain-containing protein isoform X6 [Balaenoptera acutorostrata scammoni]    | GCF_000493695.1 | TRADDN-DEDD2 |
| XP_019835475.1 | low-complexity+DED+TRADDN-DEDD2 | 327 | DEDD2      | vertebrata | Bos indicus                         | PREDICTED: DNA-binding death effector domain-containing protein 2 [Bos indicus]                         | GCF_000247795.1 | TRADDN-DEDD2 |
| ELR46493.1     | low-complexity+DED+TRADDN-DEDD2 | 354 | M91_20757  | vertebrata | Bos mutus                           | Death effector domain-containing protein [Bos mutus]                                                    | GCA_000298355.1 | TRADDN-DEDD2 |
| XP_005909260.1 | low-complexity+DED+TRADDN-DEDD2 | 275 | DEDD       | vertebrata | Bos mutus                           | PREDICTED: death effector domain-containing protein isoform X3 [Bos mutus]                              | GCF_000298355.1 | TRADDN-DEDD2 |
| ABM06141.1     | low-complexity+DED+TRADDN-DEDD2 | 318 | DEDD       | vertebrata | Bos taurus                          | death effector domain-containing protein [Bos taurus]                                                   | -               | TRADDN-DEDD2 |

| acc            | architecture                    | len | gen.name      | taxend     | species                | define                                                                                 | gca             | clade        |
|----------------|---------------------------------|-----|---------------|------------|------------------------|----------------------------------------------------------------------------------------|-----------------|--------------|
| NP_001029815.1 | low-complexity+DED+TRADDN-DEDD2 | 312 | DEDD          | vertebrata | Bos taurus             | death effector domain-containing protein [Bos taurus]                                  | GCF_002263795.1 | TRADDN-DEDD2 |
| NP_001069485.1 | low-complexity+DED+TRADDN-DEDD2 | 327 | DEDD2         | vertebrata | Bos taurus             | DNA-binding death effector domain-containing protein 2 [Bos taurus]                    | GCF_002263795.1 | TRADDN-DEDD2 |
| XP_005203591.1 | low-complexity+DED+TRADDN-DEDD2 | 318 | DEDD          | vertebrata | Bos taurus             | death effector domain-containing protein isoform X1 [Bos taurus]                       | GCF_002263795.1 | TRADDN-DEDD2 |
| XP_006041310.1 | low-complexity+DED+TRADDN-DEDD2 | 326 | DEDD2         | vertebrata | Bubalus bubalis        | DNA-binding death effector domain-containing protein 2 isoform X2 [Bubalus bubalis]    | GCF_003121395.1 | TRADDN-DEDD2 |
| XP_006048553.1 | low-complexity+DED+TRADDN-DEDD2 | 318 | DEDD          | vertebrata | Bubalus bubalis        | death effector domain-containing protein [Bubalus bubalis]                             | GCF_003121395.1 | TRADDN-DEDD2 |
| XP_025124957.1 | low-complexity+DED+TRADDN-DEDD2 | 364 | DEDD2         | vertebrata | Bubalus bubalis        | DNA-binding death effector domain-containing protein 2 isoform X1 [Bubalus bubalis]    | GCF_003121395.1 | TRADDN-DEDD2 |
| XP_014817780.1 | low-complexity+DED+TRADDN-DEDD2 | 318 | DEDD          | vertebrata | Calidris pugnax        | PREDICTED: death effector domain-containing protein isoform X2 [Calidris pugnax]       | GCF_001431845.1 | TRADDN-DEDD2 |
| OXB53792.1     | low-complexity+DED+TRADDN-DEDD2 | 324 | ASZ78_000038  | vertebrata | Callipepla squamata    | hypothetical protein ASZ78_000038, partial [Callipepla squamata]                       | GCA_002218305.1 | TRADDN-DEDD2 |
| XP_002760226.1 | low-complexity+DED+TRADDN-DEDD2 | 318 | DEDD          | vertebrata | Callithrix jacchus     | PREDICTED: death effector domain-containing protein [Callithrix jacchus]               | GCF_000004665.1 | TRADDN-DEDD2 |
| XP_002762234.2 | low-complexity+DED+TRADDN-DEDD2 | 326 | DEDD2         | vertebrata | Callithrix jacchus     | PREDICTED: DNA-binding death effector domain-containing protein 2 [Callithrix jacchus] | GCF_000004665.1 | TRADDN-DEDD2 |
| XP_007907831.1 | low-complexity+DED+TRADDN-DEDD2 | 325 | dedd          | vertebrata | Callorhinchus milii    | PREDICTED: death effector domain-containing protein isoform X1 [Callorhinchus milii]   | GCF_000165045.1 | TRADDN-DEDD2 |
| XP_007907832.1 | low-complexity+DED+TRADDN-DEDD2 | 278 | dedd          | vertebrata | Callorhinchus milii    | PREDICTED: death effector domain-containing protein isoform X2 [Callorhinchus milii]   | GCF_000165045.1 | TRADDN-DEDD2 |
| XP_025705346.1 | low-complexity+DED+TRADDN-DEDD2 | 327 | DEDD2         | vertebrata | Callorhinus ursinus    | DNA-binding death effector domain-containing protein 2 [Callorhinus ursinus]           | GCF_003265705.1 | TRADDN-DEDD2 |
| XP_025716367.1 | low-complexity+DED+TRADDN-DEDD2 | 320 | DEDD          | vertebrata | Callorhinus ursinus    | death effector domain-containing protein isoform X1 [Callorhinus ursinus]              | GCF_003265705.1 | TRADDN-DEDD2 |
| EPY88999.1     | low-complexity+DED+TRADDN-DEDD2 | 290 | CB1_000141020 | vertebrata | Camelus ferus          | death effector domain-containing protein [Camelus ferus]                               | GCA_000311805.2 | TRADDN-DEDD2 |
| XP_006174018.1 | low-complexity+DED+TRADDN-DEDD2 | 319 | DEDD          | vertebrata | Camelus ferus          | PREDICTED: death effector domain-containing protein [Camelus ferus]                    | GCF_000311805.1 | TRADDN-DEDD2 |
| XP_006175117.1 | low-complexity+DED+TRADDN-DEDD2 | 326 | DEDD2         | vertebrata | Camelus ferus          | PREDICTED: DNA-binding death effector domain-containing protein 2 [Camelus ferus]      | GCF_000311805.1 | TRADDN-DEDD2 |
| XP_025280606.1 | low-complexity+DED+TRADDN-DEDD2 | 329 | DEDD2         | vertebrata | Canis lupus dingo      | DNA-binding death effector domain-containing protein 2 [Canis lupus dingo]             | GCF_003254725.1 | TRADDN-DEDD2 |
| XP_022271143.1 | low-complexity+DED+TRADDN-DEDD2 | 320 | DEDD          | vertebrata | Canis lupus familiaris | death effector domain-containing protein isoform X1 [Canis lupus familiaris]           | GCF_000002285.3 | TRADDN-DEDD2 |

| acc            | architecture                    | len | gen.name     | taxend     | species                   | define                                                                                        | gca             | clade        |
|----------------|---------------------------------|-----|--------------|------------|---------------------------|-----------------------------------------------------------------------------------------------|-----------------|--------------|
| XP_855274.1    | low-complexity+DED+TRADDN-DEDD2 | 329 | DEDD2        | vertebrata | Canis lupus familiaris    | DNA-binding death effector domain-containing protein 2 [Canis lupus familiaris]               | GCF_000002285.3 | TRADDN-DEDD2 |
| XP_017901892.1 | low-complexity+DED+TRADDN-DEDD2 | 318 | DEDD         | vertebrata | Capra hircus              | PREDICTED: death effector domain-containing protein [Capra hircus]                            | GCF_001704415.1 | TRADDN-DEDD2 |
| KFP64974.1     | low-complexity+DED+TRADDN-DEDD2 | 286 | N322_06189   | vertebrata | Cariama cristata          | Death effector domain-containing protein, partial [Cariama cristata]                          | GCA_000690535.1 | TRADDN-DEDD2 |
| XP_009698398.1 | low-complexity+DED+TRADDN-DEDD2 | 253 | DEDD         | vertebrata | Cariama cristata          | PREDICTED: death effector domain-containing protein, partial [Cariama cristata]               | GCF_000690535.1 | TRADDN-DEDD2 |
| XP_008046461.1 | low-complexity+DED+TRADDN-DEDD2 | 326 | DEDD2        | vertebrata | Carlito syrichta          | DNA-binding death effector domain-containing protein 2 isoform X1 [Carlito syrichta]          | GCF_000164805.1 | TRADDN-DEDD2 |
| XP_008046462.1 | low-complexity+DED+TRADDN-DEDD2 | 321 | DEDD2        | vertebrata | Carlito syrichta          | DNA-binding death effector domain-containing protein 2 isoform X2 [Carlito syrichta]          | GCF_000164805.1 | TRADDN-DEDD2 |
| XP_008064100.1 | low-complexity+DED+TRADDN-DEDD2 | 318 | LOC103268351 | vertebrata | Carlito syrichta          | death effector domain-containing protein isoform X1 [Carlito syrichta]                        | GCF_000164805.1 | TRADDN-DEDD2 |
| XP_008064101.1 | low-complexity+DED+TRADDN-DEDD2 | 317 | LOC103268351 | vertebrata | Carlito syrichta          | death effector domain-containing protein isoform X2 [Carlito syrichta]                        | GCF_000164805.1 | TRADDN-DEDD2 |
| XP_021572145.1 | low-complexity+DED+TRADDN-DEDD2 | 275 | LOC103268351 | vertebrata | Carlito syrichta          | death effector domain-containing protein isoform X4 [Carlito syrichta]                        | GCF_000164805.1 | TRADDN-DEDD2 |
| XP_020027681.1 | low-complexity+DED+TRADDN-DEDD2 | 327 | Dedd2        | vertebrata | Castor canadensis         | DNA-binding death effector domain-containing protein 2 [Castor canadensis]                    | GCF_001984765.1 | TRADDN-DEDD2 |
| XP_020029941.1 | low-complexity+DED+TRADDN-DEDD2 | 318 | Dedd         | vertebrata | Castor canadensis         | death effector domain-containing protein [Castor canadensis]                                  | GCF_001984765.1 | TRADDN-DEDD2 |
| XP_003466629.1 | low-complexity+DED+TRADDN-DEDD2 | 318 | Dedd         | vertebrata | Cavia porcellus           | death effector domain-containing protein [Cavia porcellus]                                    | GCF_000151735.1 | TRADDN-DEDD2 |
| XP_005001360.1 | low-complexity+DED+TRADDN-DEDD2 | 330 | Dedd2        | vertebrata | Cavia porcellus           | DNA-binding death effector domain-containing protein 2 [Cavia porcellus]                      | GCF_000151735.1 | TRADDN-DEDD2 |
| XP_017358636.1 | low-complexity+DED+TRADDN-DEDD2 | 326 | DEDD2        | vertebrata | Cebus capucinus imitator  | PREDICTED: DNA-binding death effector domain-containing protein 2 [Cebus capucinus imitator]  | GCF_001604975.1 | TRADDN-DEDD2 |
| XP_017370555.1 | low-complexity+DED+TRADDN-DEDD2 | 318 | DEDD         | vertebrata | Cebus capucinus imitator  | PREDICTED: death effector domain-containing protein [Cebus capucinus imitator]                | GCF_001604975.1 | TRADDN-DEDD2 |
| XP_004440150.1 | low-complexity+DED+TRADDN-DEDD2 | 326 | LOC101405113 | vertebrata | Ceratotherium simum simum | PREDICTED: DNA-binding death effector domain-containing protein 2 [Ceratotherium simum simum] | GCF_000283155.1 | TRADDN-DEDD2 |
| XP_011922952.1 | low-complexity+DED+TRADDN-DEDD2 | 282 | DEDD         | vertebrata | Cercocebus atys           | PREDICTED: death effector domain-containing protein isoform X2 [Cercocebus atys]              | GCF_000955945.1 | TRADDN-DEDD2 |
| XP_011942305.1 | low-complexity+DED+TRADDN-DEDD2 | 326 | DEDD2        | vertebrata | Cercocebus atys           | PREDICTED: DNA-binding death effector domain-containing protein 2 [Cercocebus atys]           | GCF_000955945.1 | TRADDN-DEDD2 |
| KFU91941.1     | low-complexity+DED+TRADDN-DEDD2 | 293 | M959_03872   | vertebrata | Chaetura pelagica         | Death effector domain-containing protein, partial [Chaetura pelagica]                         | GCA_000747805.1 | TRADDN-DEDD2 |



| acc            | architecture                    | len | gen.name    | taxend     | species                | define                                                                                                | gca             | clade        |
|----------------|---------------------------------|-----|-------------|------------|------------------------|-------------------------------------------------------------------------------------------------------|-----------------|--------------|
| XP_009999021.1 | low-complexity+DED+TRADDN-DEDD2 | 317 | DEDD        | vertebrata | Chaetura pelagica      | PREDICTED: death effector domain-containing protein [Chaetura pelagica]                               | GCF_000747805.1 | TRADDN-DEDD2 |
| KGL94642.1     | low-complexity+DED+TRADDN-DEDD2 | 313 | N301_05719  | vertebrata | Charadrius vociferus   | Death effector domain-containing protein, partial [Charadrius vociferus]                              | GCA_000708025.2 | TRADDN-DEDD2 |
| XP_009884968.1 | low-complexity+DED+TRADDN-DEDD2 | 296 | DEDD2       | vertebrata | Charadrius vociferus   | PREDICTED: DNA-binding death effector domain-containing protein 2, partial [Charadrius vociferus]     | GCF_000708025.1 | TRADDN-DEDD2 |
| XP_007068191.1 | low-complexity+DED+TRADDN-DEDD2 | 318 | DEDD        | vertebrata | Chelonia mydas         | PREDICTED: death effector domain-containing protein [Chelonia mydas]                                  | GCF_000344595.1 | TRADDN-DEDD2 |
| XP_007069738.1 | low-complexity+DED+TRADDN-DEDD2 | 377 | DEDD2       | vertebrata | Chelonia mydas         | PREDICTED: DNA-binding death effector domain-containing protein 2, partial [Chelonia mydas]           | -               | TRADDN-DEDD2 |
| XP_005400295.1 | low-complexity+DED+TRADDN-DEDD2 | 318 | Dedd        | vertebrata | Chinchilla lanigera    | PREDICTED: death effector domain-containing protein [Chinchilla lanigera]                             | GCF_000276665.1 | TRADDN-DEDD2 |
| XP_005412443.1 | low-complexity+DED+TRADDN-DEDD2 | 330 | Dedd2       | vertebrata | Chinchilla lanigera    | PREDICTED: DNA-binding death effector domain-containing protein 2 [Chinchilla lanigera]               | GCF_000276665.1 | TRADDN-DEDD2 |
| XP_005293799.1 | low-complexity+DED+TRADDN-DEDD2 | 318 | DEDD        | vertebrata | Chrysemys picta bellii | death effector domain-containing protein [Chrysemys picta bellii]                                     | GCF_000241765.3 | TRADDN-DEDD2 |
| XP_005314656.1 | low-complexity+DED+TRADDN-DEDD2 | 359 | DEDD2       | vertebrata | Chrysemys picta bellii | DNA-binding death effector domain-containing protein 2 [Chrysemys picta bellii]                       | GCF_000241765.3 | TRADDN-DEDD2 |
| XP_006861723.1 | low-complexity+DED+TRADDN-DEDD2 | 318 | DEDD        | vertebrata | Chrysochloris asiatica | PREDICTED: death effector domain-containing protein isoform X1 [Chrysochloris asiatica]               | GCF_000296735.1 | TRADDN-DEDD2 |
| XP_006861724.1 | low-complexity+DED+TRADDN-DEDD2 | 275 | DEDD        | vertebrata | Chrysochloris asiatica | PREDICTED: death effector domain-containing protein isoform X2 [Chrysochloris asiatica]               | GCF_000296735.1 | TRADDN-DEDD2 |
| XP_006871437.1 | low-complexity+DED+TRADDN-DEDD2 | 328 | DEDD2       | vertebrata | Chrysochloris asiatica | PREDICTED: DNA-binding death effector domain-containing protein 2 isoform X1 [Chrysochloris asiatica] | GCF_000296735.1 | TRADDN-DEDD2 |
| XP_006871438.1 | low-complexity+DED+TRADDN-DEDD2 | 323 | DEDD2       | vertebrata | Chrysochloris asiatica | PREDICTED: DNA-binding death effector domain-containing protein 2 isoform X2 [Chrysochloris asiatica] | GCF_000296735.1 | TRADDN-DEDD2 |
| OXB71086.1     | low-complexity+DED+TRADDN-DEDD2 | 318 | H355_010466 | vertebrata | Colinus virginianus    | hypothetical protein H355_010466 [Colinus virginianus]                                                | GCA_000599465.2 | TRADDN-DEDD2 |
| PKK17218.1     | low-complexity+DED+TRADDN-DEDD2 | 300 | DEDD        | vertebrata | Columba livia          | death effector domain containing [Columba livia]                                                      | GCA_000337935.2 | TRADDN-DEDD2 |
| XP_021137301.1 | low-complexity+DED+TRADDN-DEDD2 | 325 | DEDD        | vertebrata | Columba livia          | death effector domain-containing protein [Columba livia]                                              | GCF_000337935.1 | TRADDN-DEDD2 |
| XP_004694216.1 | low-complexity+DED+TRADDN-DEDD2 | 328 | DEDD2       | vertebrata | Condylura cristata     | PREDICTED: DNA-binding death effector domain-containing protein 2 [Condylura cristata]                | GCF_000260355.1 | TRADDN-DEDD2 |
| XP_015740188.1 | low-complexity+DED+TRADDN-DEDD2 | 318 | DEDD        | vertebrata | Coturnix japonica      | PREDICTED: death effector domain-containing protein [Coturnix japonica]                               | GCF_001577835.1 | TRADDN-DEDD2 |
| ERE52693.1     | low-complexity+DED+TRADDN-DEDD2 | 326 | H671_21275  | vertebrata | Cricetulus griseus     | death effector domain-containing protein [Cricetulus griseus]                                         | GCA_000448345.1 | TRADDN-DEDD2 |

| acc            | architecture                    | len | gen.name   | taxend     | species               | define                                                                                                                 | gca             | clade        |
|----------------|---------------------------------|-----|------------|------------|-----------------------|------------------------------------------------------------------------------------------------------------------------|-----------------|--------------|
| XP_007614869.1 | low-complexity+DED+TRADDN-DEDD2 | 327 | Dedd2      | vertebrata | Cricetulus griseus    | PREDICTED: LOW QUALITY PROTEIN: DNA-binding death effector domain-containing protein 2 isoform X2 [Cricetulus griseus] | -               | TRADDN-DEDD2 |
| XP_007625798.1 | low-complexity+DED+TRADDN-DEDD2 | 318 | Dedd       | vertebrata | Cricetulus griseus    | PREDICTED: death effector domain-containing protein [Cricetulus griseus]                                               | -               | TRADDN-DEDD2 |
| XP_019397245.1 | low-complexity+DED+TRADDN-DEDD2 | 317 | DEDD2      | vertebrata | Crocodylus porosus    | PREDICTED: DNA-binding death effector domain-containing protein 2, partial [Crocodylus porosus]                        | GCF_001723895.1 | TRADDN-DEDD2 |
| KFO69894.1     | low-complexity+DED+TRADDN-DEDD2 | 296 | N303_13441 | vertebrata | Cuculus canorus       | Death effector domain-containing protein [Cuculus canorus]                                                             | GCA_000709325.1 | TRADDN-DEDD2 |
| XP_009558864.1 | low-complexity+DED+TRADDN-DEDD2 | 269 | DEDD       | vertebrata | Cuculus canorus       | PREDICTED: death effector domain-containing protein [Cuculus canorus]                                                  | GCF_000709325.1 | TRADDN-DEDD2 |
| XP_004448423.1 | low-complexity+DED+TRADDN-DEDD2 | 318 | DEDD       | vertebrata | Dasypus novemcinctus  | death effector domain-containing protein isoform X1 [Dasypus novemcinctus]                                             | GCF_000208655.1 | TRADDN-DEDD2 |
| XP_004448424.1 | low-complexity+DED+TRADDN-DEDD2 | 275 | DEDD       | vertebrata | Dasypus novemcinctus  | death effector domain-containing protein isoform X2 [Dasypus novemcinctus]                                             | GCF_000208655.1 | TRADDN-DEDD2 |
| XP_004463327.1 | low-complexity+DED+TRADDN-DEDD2 | 394 | DEDD2      | vertebrata | Dasypus novemcinctus  | DNA-binding death effector domain-containing protein 2 [Dasypus novemcinctus]                                          | GCF_000208655.1 | TRADDN-DEDD2 |
| XP_022441259.1 | low-complexity+DED+TRADDN-DEDD2 | 322 | DEDD2      | vertebrata | Delphinapterus leucas | DNA-binding death effector domain-containing protein 2 [Delphinapterus leucas]                                         | GCF_002288925.2 | TRADDN-DEDD2 |
| XP_024409848.1 | low-complexity+DED+TRADDN-DEDD2 | 318 | DEDD       | vertebrata | Desmodus rotundus     | death effector domain-containing protein [Desmodus rotundus]                                                           | GCF_002940915.1 | TRADDN-DEDD2 |
| XP_024433329.1 | low-complexity+DED+TRADDN-DEDD2 | 327 | DEDD2      | vertebrata | Desmodus rotundus     | DNA-binding death effector domain-containing protein 2 [Desmodus rotundus]                                             | GCF_002940915.1 | TRADDN-DEDD2 |
| XP_012886054.1 | low-complexity+DED+TRADDN-DEDD2 | 318 | Dedd       | vertebrata | Dipodomys ordii       | PREDICTED: death effector domain-containing protein [Dipodomys ordii]                                                  | GCF_000151885.1 | TRADDN-DEDD2 |
| XP_012888216.1 | low-complexity+DED+TRADDN-DEDD2 | 327 | Dedd2      | vertebrata | Dipodomys ordii       | PREDICTED: DNA-binding death effector domain-containing protein 2 [Dipodomys ordii]                                    | GCF_000151885.1 | TRADDN-DEDD2 |
| XP_004710418.1 | low-complexity+DED+TRADDN-DEDD2 | 327 | DEDD2      | vertebrata | Echinops telfairi     | PREDICTED: DNA-binding death effector domain-containing protein 2 isoform X1 [Echinops telfairi]                       | GCF_000313985.2 | TRADDN-DEDD2 |
| XP_004710419.1 | low-complexity+DED+TRADDN-DEDD2 | 322 | DEDD2      | vertebrata | Echinops telfairi     | PREDICTED: DNA-binding death effector domain-containing protein 2 isoform X2 [Echinops telfairi]                       | GCF_000313985.2 | TRADDN-DEDD2 |
| XP_004716583.1 | low-complexity+DED+TRADDN-DEDD2 | 318 | DEDD       | vertebrata | Echinops telfairi     | PREDICTED: death effector domain-containing protein isoform X1 [Echinops telfairi]                                     | GCF_000313985.2 | TRADDN-DEDD2 |
| XP_004716584.1 | low-complexity+DED+TRADDN-DEDD2 | 275 | DEDD       | vertebrata | Echinops telfairi     | PREDICTED: death effector domain-containing protein isoform X2 [Echinops telfairi]                                     | GCF_000313985.2 | TRADDN-DEDD2 |
| KFP11278.1     | low-complexity+DED+TRADDN-DEDD2 | 302 | Z169_01825 | vertebrata | Egretta garzetta      | Death effector domain-containing protein [Egretta garzetta]                                                            | GCA_000687185.1 | TRADDN-DEDD2 |

| acc            | architecture                    | len | gen.name     | taxend     | species                       | define                                                                                          | gca             | clade        |
|----------------|---------------------------------|-----|--------------|------------|-------------------------------|-------------------------------------------------------------------------------------------------|-----------------|--------------|
| XP_009647307.1 | low-complexity+DED+TRADDN-DEDD2 | 275 | DEDD         | vertebrata | <i>Egretta garzetta</i>       | PREDICTED: death effector domain-containing protein [Egretta garzetta]                          | GCF_000687185.1 | TRADDN-DEDD2 |
| XP_006895541.1 | low-complexity+DED+TRADDN-DEDD2 | 318 | DEDD         | vertebrata | <i>Elephantulus edwardii</i>  | PREDICTED: death effector domain-containing protein isoform X1 [Elephantulus edwardii]          | GCF_000299155.1 | TRADDN-DEDD2 |
| XP_006895544.1 | low-complexity+DED+TRADDN-DEDD2 | 275 | DEDD         | vertebrata | <i>Elephantulus edwardii</i>  | PREDICTED: death effector domain-containing protein isoform X4 [Elephantulus edwardii]          | GCF_000299155.1 | TRADDN-DEDD2 |
| XP_006900997.1 | low-complexity+DED+TRADDN-DEDD2 | 329 | DEDD2        | vertebrata | <i>Elephantulus edwardii</i>  | PREDICTED: DNA-binding death effector domain-containing protein 2 [Elephantulus edwardii]       | GCF_000299155.1 | TRADDN-DEDD2 |
| XP_022347502.1 | low-complexity+DED+TRADDN-DEDD2 | 327 | LOC111139511 | vertebrata | <i>Enhydra lutris kenyoni</i> | DNA-binding death effector domain-containing protein 2 [Enhydra lutris kenyoni]                 | GCF_002288905.1 | TRADDN-DEDD2 |
| XP_008151292.1 | low-complexity+DED+TRADDN-DEDD2 | 317 | DEDD         | vertebrata | <i>Eptesicus fuscus</i>       | PREDICTED: death effector domain-containing protein [Eptesicus fuscus]                          | GCF_000308155.1 | TRADDN-DEDD2 |
| XP_008158450.1 | low-complexity+DED+TRADDN-DEDD2 | 327 | DEDD2        | vertebrata | <i>Eptesicus fuscus</i>       | PREDICTED: DNA-binding death effector domain-containing protein 2 isoform X1 [Eptesicus fuscus] | GCF_000308155.1 | TRADDN-DEDD2 |
| XP_008158451.1 | low-complexity+DED+TRADDN-DEDD2 | 322 | DEDD2        | vertebrata | <i>Eptesicus fuscus</i>       | PREDICTED: DNA-binding death effector domain-containing protein 2 isoform X2 [Eptesicus fuscus] | -               | TRADDN-DEDD2 |
| XP_014723042.1 | low-complexity+DED+TRADDN-DEDD2 | 327 | DEDD2        | vertebrata | <i>Equus asinus</i>           | PREDICTED: DNA-binding death effector domain-containing protein 2 [Equus asinus]                | GCF_001305755.1 | TRADDN-DEDD2 |
| XP_001501404.1 | low-complexity+DED+TRADDN-DEDD2 | 327 | DEDD2        | vertebrata | <i>Equus caballus</i>         | DNA-binding death effector domain-containing protein 2 [Equus caballus]                         | GCF_002863925.1 | TRADDN-DEDD2 |
| XP_007532985.1 | low-complexity+DED+TRADDN-DEDD2 | 322 | DEDD2        | vertebrata | <i>Erinaceus europaeus</i>    | PREDICTED: DNA-binding death effector domain-containing protein 2 [Erinaceus europaeus]         | GCF_000296755.1 | TRADDN-DEDD2 |
| XP_007537472.1 | low-complexity+DED+TRADDN-DEDD2 | 318 | DEDD         | vertebrata | <i>Erinaceus europaeus</i>    | PREDICTED: death effector domain-containing protein isoform X2 [Erinaceus europaeus]            | GCF_000296755.1 | TRADDN-DEDD2 |
| XP_007537473.1 | low-complexity+DED+TRADDN-DEDD2 | 275 | DEDD         | vertebrata | <i>Erinaceus europaeus</i>    | PREDICTED: death effector domain-containing protein isoform X3 [Erinaceus europaeus]            | GCF_000296755.1 | TRADDN-DEDD2 |
| XP_016049926.1 | low-complexity+DED+TRADDN-DEDD2 | 319 | DEDD         | vertebrata | <i>Erinaceus europaeus</i>    | PREDICTED: death effector domain-containing protein isoform X1 [Erinaceus europaeus]            | GCF_000296755.1 | TRADDN-DEDD2 |
| XP_005442631.2 | low-complexity+DED+TRADDN-DEDD2 | 306 | DEDD         | vertebrata | <i>Falco cherrug</i>          | PREDICTED: death effector domain-containing protein isoform X2 [Falco cherrug]                  | -               | TRADDN-DEDD2 |
| XP_005244355.1 | low-complexity+DED+TRADDN-DEDD2 | 318 | DEDD         | vertebrata | <i>Falco peregrinus</i>       | PREDICTED: death effector domain-containing protein isoform X1 [Falco peregrinus]               | -               | TRADDN-DEDD2 |
| XP_013160233.1 | low-complexity+DED+TRADDN-DEDD2 | 317 | DEDD         | vertebrata | <i>Falco peregrinus</i>       | PREDICTED: death effector domain-containing protein isoform X2 [Falco peregrinus]               | -               | TRADDN-DEDD2 |

| acc            | architecture                    | len | gen.name     | taxend     | species                  | define                                                                                              | gca             | clade        |
|----------------|---------------------------------|-----|--------------|------------|--------------------------|-----------------------------------------------------------------------------------------------------|-----------------|--------------|
| XP_013160581.1 | low-complexity+DED+TRADDN-DEDD2 | 303 | LOC101912306 | vertebrata | Falco peregrinus         | PREDICTED: uncharacterized protein LOC101912306 [Falco peregrinus]                                  | GCF_000337955.1 | TRADDN-DEDD2 |
| XP_003997805.2 | low-complexity+DED+TRADDN-DEDD2 | 327 | DEDD2        | vertebrata | Felis catus              | DNA-binding death effector domain-containing protein 2 [Felis catus]                                | GCF_000181335.3 | TRADDN-DEDD2 |
| XP_010621607.1 | low-complexity+DED+TRADDN-DEDD2 | 326 | Dedd2        | vertebrata | Fukomys damarensis       | PREDICTED: DNA-binding death effector domain-containing protein 2 [Fukomys damarensis]              | GCF_000743615.1 | TRADDN-DEDD2 |
| XP_008565461.1 | low-complexity+DED+TRADDN-DEDD2 | 324 | DEDD2        | vertebrata | Galeopterus variegatus   | PREDICTED: DNA-binding death effector domain-containing protein 2 [Galeopterus variegatus]          | GCF_000696425.1 | TRADDN-DEDD2 |
| XP_423146.1    | low-complexity+DED+TRADDN-DEDD2 | 318 | DEDD         | vertebrata | Gallus gallus            | death effector domain-containing protein [Gallus gallus]                                            | GCF_000002315.5 | TRADDN-DEDD2 |
| XP_015263851.1 | low-complexity+DED+TRADDN-DEDD2 | 318 | DEDD         | vertebrata | Gekko japonicus          | PREDICTED: death effector domain-containing protein [Gekko japonicus]                               | GCF_001447785.1 | TRADDN-DEDD2 |
| XP_015264891.1 | low-complexity+DED+TRADDN-DEDD2 | 363 | DEDD2        | vertebrata | Gekko japonicus          | PREDICTED: DNA-binding death effector domain-containing protein 2 [Gekko japonicus]                 | GCF_001447785.1 | TRADDN-DEDD2 |
| XP_004060880.1 | low-complexity+DED+TRADDN-DEDD2 | 326 | DEDD2        | vertebrata | Gorilla gorilla gorilla  | PREDICTED: DNA-binding death effector domain-containing protein 2 [Gorilla gorilla gorilla]         | GCF_008122165.1 | TRADDN-DEDD2 |
| XP_010565157.1 | low-complexity+DED+TRADDN-DEDD2 | 349 | DEDD         | vertebrata | Haliaeetus leucocephalus | PREDICTED: death effector domain-containing protein isoform X1 [Haliaeetus leucocephalus]           | GCF_000737465.1 | TRADDN-DEDD2 |
| XP_010565161.1 | low-complexity+DED+TRADDN-DEDD2 | 318 | DEDD         | vertebrata | Haliaeetus leucocephalus | PREDICTED: death effector domain-containing protein isoform X2 [Haliaeetus leucocephalus]           | GCF_000737465.1 | TRADDN-DEDD2 |
| EHB02521.1     | low-complexity+DED+TRADDN-DEDD2 | 327 | GW7_15428    | vertebrata | Heterocephalus glaber    | DNA-binding death effector domain-containing protein 2 [Heterocephalus glaber]                      | GCA_000230445.1 | TRADDN-DEDD2 |
| EHB06402.1     | low-complexity+DED+TRADDN-DEDD2 | 279 | GW7_06456    | vertebrata | Heterocephalus glaber    | Death effector domain-containing protein [Heterocephalus glaber]                                    | GCA_000230445.1 | TRADDN-DEDD2 |
| XP_004858739.1 | low-complexity+DED+TRADDN-DEDD2 | 318 | Dedd         | vertebrata | Heterocephalus glaber    | death effector domain-containing protein isoform X2 [Heterocephalus glaber]                         | GCF_000247695.1 | TRADDN-DEDD2 |
| XP_004873097.1 | low-complexity+DED+TRADDN-DEDD2 | 327 | Dedd2        | vertebrata | Heterocephalus glaber    | DNA-binding death effector domain-containing protein 2 isoform X1 [Heterocephalus glaber]           | GCF_000247695.1 | TRADDN-DEDD2 |
| XP_012932953.1 | low-complexity+DED+TRADDN-DEDD2 | 335 | Dedd         | vertebrata | Heterocephalus glaber    | death effector domain-containing protein isoform X1 [Heterocephalus glaber]                         | GCF_000247695.1 | TRADDN-DEDD2 |
| XP_019484602.1 | low-complexity+DED+TRADDN-DEDD2 | 327 | DEDD2        | vertebrata | Hipposideros armiger     | PREDICTED: DNA-binding death effector domain-containing protein 2 isoform X1 [Hipposideros armiger] | GCF_001890085.1 | TRADDN-DEDD2 |
| XP_019484607.1 | low-complexity+DED+TRADDN-DEDD2 | 318 | DEDD2        | vertebrata | Hipposideros armiger     | PREDICTED: DNA-binding death effector domain-containing protein 2 isoform X2 [Hipposideros armiger] | GCF_001890085.1 | TRADDN-DEDD2 |
| XP_019484609.1 | low-complexity+DED+TRADDN-DEDD2 | 295 | DEDD2        | vertebrata | Hipposideros armiger     | PREDICTED: DNA-binding death effector domain-containing protein 2 isoform X4 [Hipposideros armiger] | GCF_001890085.1 | TRADDN-DEDD2 |

| acc            | architecture                    | len | gen.name                        | taxend     | species                    | define                                                                                   | gca              | clade        |
|----------------|---------------------------------|-----|---------------------------------|------------|----------------------------|------------------------------------------------------------------------------------------|------------------|--------------|
| XP_019488629.1 | low-complexity+DED+TRADDN-DEDD2 | 318 | DEDD                            | vertebrata | Hipposideros armiger       | PREDICTED: death effector domain-containing protein [Hipposideros armiger]               | GCF_001890085.1  | TRADDN-DEDD2 |
| RMB88258.1     | low-complexity+DED+TRADDN-DEDD2 | 276 | DUI87_35370                     | vertebrata | Hirundo rustica rustica    | hypothetical protein DUI87_35370 [Hirundo rustica rustica]                               | GCA_003692655.1  | TRADDN-DEDD2 |
| AAC17110.3     | low-complexity+DED+TRADDN-DEDD2 | 348 | -                               | vertebrata | Homo sapiens               | KE05 protein [Homo sapiens]                                                              | -                | TRADDN-DEDD2 |
| AAM10835.1     | low-complexity+DED+TRADDN-DEDD2 | 326 | FLAME-3                         | vertebrata | Homo sapiens               | death effector domain-containing protein FLAME-3 [Homo sapiens]                          | -                | TRADDN-DEDD2 |
| BAC11551.1     | low-complexity+DED+TRADDN-DEDD2 | 326 | -                               | vertebrata | Homo sapiens               | unnamed protein product [Homo sapiens]                                                   | -                | TRADDN-DEDD2 |
| BAG51086.1     | low-complexity+DED+TRADDN-DEDD2 | 318 | -                               | vertebrata | Homo sapiens               | unnamed protein product [Homo sapiens]                                                   | -                | TRADDN-DEDD2 |
| BAG59233.1     | low-complexity+DED+TRADDN-DEDD2 | 275 | -                               | vertebrata | Homo sapiens               | unnamed protein product [Homo sapiens]                                                   | -                | TRADDN-DEDD2 |
| NP_001257544.1 | low-complexity+DED+TRADDN-DEDD2 | 321 | FLAME-3,FLAME3                  | vertebrata | Homo sapiens               | DNA-binding death effector domain-containing protein 2 isoform 2 [Homo sapiens]          | GCF_000001405.39 | TRADDN-DEDD2 |
| NP_001317694.1 | low-complexity+DED+TRADDN-DEDD2 | 348 | CASP8IP1,DEDD1,DEFT,FLDED1,KE05 | vertebrata | Homo sapiens               | death effector domain-containing protein isoform a [Homo sapiens]                        | GCF_000001405.39 | TRADDN-DEDD2 |
| NP_127491.1    | low-complexity+DED+TRADDN-DEDD2 | 318 | CASP8IP1,DEDD1,DEFT,FLDED1,KE05 | vertebrata | Homo sapiens               | death effector domain-containing protein isoform b [Homo sapiens]                        | GCF_000001405.39 | TRADDN-DEDD2 |
| NP_579874.1    | low-complexity+DED+TRADDN-DEDD2 | 326 | FLAME-3,FLAME3                  | vertebrata | Homo sapiens               | DNA-binding death effector domain-containing protein 2 isoform 1 [Homo sapiens]          | GCF_000001405.39 | TRADDN-DEDD2 |
| XP_011524871.1 | low-complexity+DED+TRADDN-DEDD2 | 366 | FLAME-3,FLAME3                  | vertebrata | Homo sapiens               | DNA-binding death effector domain-containing protein 2 isoform X1 [Homo sapiens]         | GCF_000001405.39 | TRADDN-DEDD2 |
| XP_005338219.1 | low-complexity+DED+TRADDN-DEDD2 | 327 | Dedd2                           | vertebrata | Ictidomys tridecemlineatus | DNA-binding death effector domain-containing protein 2 [Ictidomys tridecemlineatus]      | GCF_000236235.1  | TRADDN-DEDD2 |
| XP_005341892.1 | low-complexity+DED+TRADDN-DEDD2 | 318 | Dedd                            | vertebrata | Ictidomys tridecemlineatus | death effector domain-containing protein [Ictidomys tridecemlineatus]                    | GCF_000236235.1  | TRADDN-DEDD2 |
| XP_004671188.1 | low-complexity+DED+TRADDN-DEDD2 | 318 | Dedd                            | vertebrata | Jaculus jaculus            | PREDICTED: death effector domain-containing protein isoform X1 [Jaculus jaculus]         | GCF_000280705.1  | TRADDN-DEDD2 |
| XP_004671190.1 | low-complexity+DED+TRADDN-DEDD2 | 275 | Dedd                            | vertebrata | Jaculus jaculus            | PREDICTED: death effector domain-containing protein isoform X2 [Jaculus jaculus]         | GCF_000280705.1  | TRADDN-DEDD2 |
| XP_005998029.1 | low-complexity+DED+TRADDN-DEDD2 | 372 | DEDD2                           | vertebrata | Latimeria chalumnae        | PREDICTED: DNA-binding death effector domain-containing protein 2 [Latimeria chalumnae]  | GCF_000225785.1  | TRADDN-DEDD2 |
| XP_006004949.1 | low-complexity+DED+TRADDN-DEDD2 | 315 | DEDD                            | vertebrata | Latimeria chalumnae        | PREDICTED: death effector domain-containing protein [Latimeria chalumnae]                | GCF_000225785.1  | TRADDN-DEDD2 |
| XP_006747447.1 | low-complexity+DED+TRADDN-DEDD2 | 318 | DEDD                            | vertebrata | Leptonychotes weddellii    | PREDICTED: death effector domain-containing protein isoform X1 [Leptonychotes weddellii] | GCF_000349705.1  | TRADDN-DEDD2 |
| XP_006747448.1 | low-complexity+DED+TRADDN-DEDD2 | 275 | DEDD                            | vertebrata | Leptonychotes weddellii    | PREDICTED: death effector domain-containing protein isoform X2 [Leptonychotes weddellii] | -                | TRADDN-DEDD2 |

| acc            | architecture                    | len | gen.name     | taxend     | species                    | define                                                                                           | gca             | clade        |
|----------------|---------------------------------|-----|--------------|------------|----------------------------|--------------------------------------------------------------------------------------------------|-----------------|--------------|
| XP_006748342.1 | low-complexity+DED+TRADDN-DEDD2 | 328 | DEDD2        | vertebrata | Leptonychotes weddellii    | PREDICTED: DNA-binding death effector domain-containing protein 2-like [Leptonychotes weddellii] | GCF_000349705.1 | TRADDN-DEDD2 |
| XP_007458662.1 | low-complexity+DED+TRADDN-DEDD2 | 323 | DEDD2        | vertebrata | Lipotes vexillifer         | PREDICTED: DNA-binding death effector domain-containing protein 2 [Lipotes vexillifer]           | GCF_000442215.1 | TRADDN-DEDD2 |
| XP_007467180.1 | low-complexity+DED+TRADDN-DEDD2 | 318 | DEDD         | vertebrata | Lipotes vexillifer         | PREDICTED: death effector domain-containing protein isoform X1 [Lipotes vexillifer]              | GCF_000442215.1 | TRADDN-DEDD2 |
| XP_007467181.1 | low-complexity+DED+TRADDN-DEDD2 | 275 | DEDD         | vertebrata | Lipotes vexillifer         | PREDICTED: death effector domain-containing protein isoform X2 [Lipotes vexillifer]              | GCF_000442215.1 | TRADDN-DEDD2 |
| XP_021401768.1 | low-complexity+DED+TRADDN-DEDD2 | 324 | DEDD         | vertebrata | Lonchura striata domestica | death effector domain-containing protein isoform X1 [Lonchura striata domestica]                 | GCF_005870125.1 | TRADDN-DEDD2 |
| XP_021401769.1 | low-complexity+DED+TRADDN-DEDD2 | 275 | DEDD         | vertebrata | Lonchura striata domestica | death effector domain-containing protein isoform X2 [Lonchura striata domestica]                 | GCF_005870125.1 | TRADDN-DEDD2 |
| XP_003415242.1 | low-complexity+DED+TRADDN-DEDD2 | 318 | DEDD         | vertebrata | Loxodonta africana         | death effector domain-containing protein isoform X2 [Loxodonta africana]                         | GCF_000001905.1 | TRADDN-DEDD2 |
| XP_010593191.1 | low-complexity+DED+TRADDN-DEDD2 | 320 | DEDD         | vertebrata | Loxodonta africana         | death effector domain-containing protein isoform X1 [Loxodonta africana]                         | GCF_000001905.1 | TRADDN-DEDD2 |
| XP_023399782.1 | low-complexity+DED+TRADDN-DEDD2 | 386 | DEDD2        | vertebrata | Loxodonta africana         | LOW QUALITY PROTEIN: DNA-binding death effector domain-containing protein 2 [Loxodonta africana] | GCF_000001905.1 | TRADDN-DEDD2 |
| XP_023409960.1 | low-complexity+DED+TRADDN-DEDD2 | 277 | DEDD         | vertebrata | Loxodonta africana         | death effector domain-containing protein isoform X3 [Loxodonta africana]                         | GCF_000001905.1 | TRADDN-DEDD2 |
| XP_023409961.1 | low-complexity+DED+TRADDN-DEDD2 | 275 | DEDD         | vertebrata | Loxodonta africana         | death effector domain-containing protein isoform X4 [Loxodonta africana]                         | GCF_000001905.1 | TRADDN-DEDD2 |
| EHH59630.1     | low-complexity+DED+TRADDN-DEDD2 | 326 | EGM_09786    | vertebrata | Macaca fascicularis        | hypothetical protein EGM_09786 [Macaca fascicularis]                                             | GCA_000230815.1 | TRADDN-DEDD2 |
| EHH30085.1     | low-complexity+DED+TRADDN-DEDD2 | 326 | EGK_10673    | vertebrata | Macaca mulatta             | hypothetical protein EGK_10673 [Macaca mulatta]                                                  | GCA_000230795.1 | TRADDN-DEDD2 |
| NP_001244370.1 | low-complexity+DED+TRADDN-DEDD2 | 318 | DEDD         | vertebrata | Macaca mulatta             | death effector domain-containing protein [Macaca mulatta]                                        | GCF_003339765.1 | TRADDN-DEDD2 |
| XP_017926376.1 | low-complexity+DED+TRADDN-DEDD2 | 314 | LOC103754474 | vertebrata | Manacus vitellinus         | LOW QUALITY PROTEIN: death effector domain-containing protein [Manacus vitellinus]               | -               | TRADDN-DEDD2 |
| XP_011831689.1 | low-complexity+DED+TRADDN-DEDD2 | 318 | DEDD         | vertebrata | Mandrillus leucophaeus     | PREDICTED: death effector domain-containing protein isoform X1 [Mandrillus leucophaeus]          | GCF_000951045.1 | TRADDN-DEDD2 |
| XP_011831699.1 | low-complexity+DED+TRADDN-DEDD2 | 275 | DEDD         | vertebrata | Mandrillus leucophaeus     | PREDICTED: death effector domain-containing protein isoform X2 [Mandrillus leucophaeus]          | GCF_000951045.1 | TRADDN-DEDD2 |
| XP_017495548.1 | low-complexity+DED+TRADDN-DEDD2 | 318 | DEDD         | vertebrata | Manis javanica             | PREDICTED: death effector domain-containing protein [Manis javanica]                             | GCF_001685135.1 | TRADDN-DEDD2 |

| acc            | architecture                    | len | gen.name     | taxend     | species                 | define                                                                                      | gca             | clade        |
|----------------|---------------------------------|-----|--------------|------------|-------------------------|---------------------------------------------------------------------------------------------|-----------------|--------------|
| XP_017509902.1 | low-complexity+DED+TRADDN-DEDD2 | 327 | DEDD2        | vertebrata | Manis javanica          | PREDICTED: DNA-binding death effector domain-containing protein 2 [Manis javanica]          | GCF_001685135.1 | TRADDN-DEDD2 |
| XP_015347449.1 | low-complexity+DED+TRADDN-DEDD2 | 318 | Dedd         | vertebrata | Marmota marmota marmota | PREDICTED: death effector domain-containing protein [Marmota marmota marmota]               | GCF_001458135.1 | TRADDN-DEDD2 |
| XP_015352266.1 | low-complexity+DED+TRADDN-DEDD2 | 327 | Dedd2        | vertebrata | Marmota marmota marmota | PREDICTED: DNA-binding death effector domain-containing protein 2 [Marmota marmota marmota] | GCF_001458135.1 | TRADDN-DEDD2 |
| XP_010725554.1 | low-complexity+DED+TRADDN-DEDD2 | 318 | DEDD         | vertebrata | Meleagris gallopavo     | PREDICTED: death effector domain-containing protein [Meleagris gallopavo]                   | GCF_000146605.2 | TRADDN-DEDD2 |
| XP_005139706.1 | low-complexity+DED+TRADDN-DEDD2 | 318 | LOC101872591 | vertebrata | Melopsittacus undulatus | PREDICTED: death effector domain-containing protein [Melopsittacus undulatus]               | GCF_000238935.1 | TRADDN-DEDD2 |
| XP_021502769.1 | low-complexity+DED+TRADDN-DEDD2 | 318 | Dedd         | vertebrata | Meriones unguiculatus   | death effector domain-containing protein isoform X1 [Meriones unguiculatus]                 | GCF_002204375.1 | TRADDN-DEDD2 |
| XP_021502775.1 | low-complexity+DED+TRADDN-DEDD2 | 305 | Dedd         | vertebrata | Meriones unguiculatus   | death effector domain-containing protein isoform X2 [Meriones unguiculatus]                 | GCF_002204375.1 | TRADDN-DEDD2 |
| XP_021516819.1 | low-complexity+DED+TRADDN-DEDD2 | 333 | Dedd2        | vertebrata | Meriones unguiculatus   | DNA-binding death effector domain-containing protein 2 isoform X1 [Meriones unguiculatus]   | GCF_002204375.1 | TRADDN-DEDD2 |
| XP_021516822.1 | low-complexity+DED+TRADDN-DEDD2 | 325 | Dedd2        | vertebrata | Meriones unguiculatus   | DNA-binding death effector domain-containing protein 2 isoform X2 [Meriones unguiculatus]   | GCF_002204375.1 | TRADDN-DEDD2 |
| XP_005087104.1 | low-complexity+DED+TRADDN-DEDD2 | 325 | Dedd2        | vertebrata | Mesocricetus auratus    | DNA-binding death effector domain-containing protein 2 [Mesocricetus auratus]               | GCF_000349665.1 | TRADDN-DEDD2 |
| XP_005087819.1 | low-complexity+DED+TRADDN-DEDD2 | 318 | Dedd         | vertebrata | Mesocricetus auratus    | death effector domain-containing protein [Mesocricetus auratus]                             | GCF_000349665.1 | TRADDN-DEDD2 |
| XP_005348865.1 | low-complexity+DED+TRADDN-DEDD2 | 318 | Dedd         | vertebrata | Microtus ochrogaster    | death effector domain-containing protein [Microtus ochrogaster]                             | GCF_000317375.1 | TRADDN-DEDD2 |
| XP_005361193.1 | low-complexity+DED+TRADDN-DEDD2 | 328 | Dedd2        | vertebrata | Microtus ochrogaster    | DNA-binding death effector domain-containing protein 2 isoform X2 [Microtus ochrogaster]    | GCF_000317375.1 | TRADDN-DEDD2 |
| XP_026642138.1 | low-complexity+DED+TRADDN-DEDD2 | 287 | Dedd2        | vertebrata | Microtus ochrogaster    | DNA-binding death effector domain-containing protein 2 isoform X1 [Microtus ochrogaster]    | GCF_000317375.1 | TRADDN-DEDD2 |
| XP_016064748.1 | low-complexity+DED+TRADDN-DEDD2 | 327 | DEDD2        | vertebrata | Miniopterus natalensis  | PREDICTED: DNA-binding death effector domain-containing protein 2 [Miniopterus natalensis]  | GCF_001595765.1 | TRADDN-DEDD2 |
| XP_016065904.1 | low-complexity+DED+TRADDN-DEDD2 | 318 | DEDD         | vertebrata | Miniopterus natalensis  | PREDICTED: death effector domain-containing protein [Miniopterus natalensis]                | GCF_001595765.1 | TRADDN-DEDD2 |
| XP_001371905.1 | low-complexity+DED+TRADDN-DEDD2 | 318 | DEDD         | vertebrata | Monodelphis domestica   | PREDICTED: death effector domain-containing protein isoform X1 [Monodelphis domestica]      | GCF_000002295.2 | TRADDN-DEDD2 |

| acc            | architecture                    | len | gen.name                           | taxend     | species               | define                                                                                                         | gca              | clade        |
|----------------|---------------------------------|-----|------------------------------------|------------|-----------------------|----------------------------------------------------------------------------------------------------------------|------------------|--------------|
| XP_003342303.2 | low-complexity+DED+TRADDN-DEDD2 | 378 | DEDD2                              | vertebrata | Monodelphis domestica | PREDICTED: LOW QUALITY PROTEIN: DNA-binding death effector domain-containing protein 2 [Monodelphis domestica] | GCF_000002295.2  | TRADDN-DEDD2 |
| XP_007485030.1 | low-complexity+DED+TRADDN-DEDD2 | 282 | DEDD                               | vertebrata | Monodelphis domestica | PREDICTED: death effector domain-containing protein isoform X2 [Monodelphis domestica]                         | GCF_000002295.2  | TRADDN-DEDD2 |
| XP_007485031.1 | low-complexity+DED+TRADDN-DEDD2 | 275 | DEDD                               | vertebrata | Monodelphis domestica | PREDICTED: death effector domain-containing protein isoform X3 [Monodelphis domestica]                         | GCF_000002295.2  | TRADDN-DEDD2 |
| XP_021023161.1 | low-complexity+DED+TRADDN-DEDD2 | 413 | Dedd2                              | vertebrata | Mus caroli            | DNA-binding death effector domain-containing protein 2 isoform X1 [Mus caroli]                                 | GCF_900094665.1  | TRADDN-DEDD2 |
| XP_021023162.1 | low-complexity+DED+TRADDN-DEDD2 | 369 | Dedd2                              | vertebrata | Mus caroli            | DNA-binding death effector domain-containing protein 2 isoform X2 [Mus caroli]                                 | -                | TRADDN-DEDD2 |
| AAD16415.1     | low-complexity+DED+TRADDN-DEDD2 | 318 | Dedpro1                            | vertebrata | Mus musculus          | death effector domain-containing protein DEDPRO1 [Mus musculus]                                                | -                | TRADDN-DEDD2 |
| AAH54445.1     | low-complexity+DED+TRADDN-DEDD2 | 318 | CASP8IP1                           | vertebrata | Mus musculus          | Death effector domain-containing [Mus musculus]                                                                | -                | TRADDN-DEDD2 |
| BAE22179.1     | low-complexity+DED+TRADDN-DEDD2 | 318 | -                                  | vertebrata | Mus musculus          | unnamed protein product [Mus musculus]                                                                         | -                | TRADDN-DEDD2 |
| EDL24288.1     | low-complexity+DED+TRADDN-DEDD2 | 313 | mCG_7275                           | vertebrata | Mus musculus          | mCG7275, isoform CRA_b, partial [Mus musculus]                                                                 | GCA_000002165.1  | TRADDN-DEDD2 |
| NP_035745.3    | low-complexity+DED+TRADDN-DEDD2 | 318 | CASP8IP1,Ded-pro1,DEFT,FLDED1,KE05 | vertebrata | Mus musculus          | death effector domain-containing protein [Mus musculus]                                                        | GCF_000001635.26 | TRADDN-DEDD2 |
| NP_997560.3    | low-complexity+DED+TRADDN-DEDD2 | 330 | 2410050E11Rik,FLAME-3              | vertebrata | Mus musculus          | DNA-binding death effector domain-containing protein 2 [Mus musculus]                                          | GCF_000001635.26 | TRADDN-DEDD2 |
| XP_021053693.1 | low-complexity+DED+TRADDN-DEDD2 | 275 | Dedd                               | vertebrata | Mus pahari            | death effector domain-containing protein isoform X2 [Mus pahari]                                               | -                | TRADDN-DEDD2 |
| XP_004775959.1 | low-complexity+DED+TRADDN-DEDD2 | 318 | DEDD                               | vertebrata | Mustela putorius furo | PREDICTED: death effector domain-containing protein [Mustela putorius furo]                                    | GCF_000215625.1  | TRADDN-DEDD2 |
| XP_012919430.1 | low-complexity+DED+TRADDN-DEDD2 | 440 | DEDD2                              | vertebrata | Mustela putorius furo | PREDICTED: DNA-binding death effector domain-containing protein 2 [Mustela putorius furo]                      | GCF_000215625.1  | TRADDN-DEDD2 |
| XP_005880525.1 | low-complexity+DED+TRADDN-DEDD2 | 318 | DEDD                               | vertebrata | Myotis brandtii       | PREDICTED: death effector domain-containing protein [Myotis brandtii]                                          | GCF_000412655.1  | TRADDN-DEDD2 |
| XP_005883974.1 | low-complexity+DED+TRADDN-DEDD2 | 292 | DEDD2                              | vertebrata | Myotis brandtii       | PREDICTED: DNA-binding death effector domain-containing protein 2 [Myotis brandtii]                            | GCF_000412655.1  | TRADDN-DEDD2 |
| XP_006761133.1 | low-complexity+DED+TRADDN-DEDD2 | 327 | DEDD2                              | vertebrata | Myotis davidii        | PREDICTED: DNA-binding death effector domain-containing protein 2 [Myotis davidii]                             | GCF_000327345.1  | TRADDN-DEDD2 |
| XP_006764795.1 | low-complexity+DED+TRADDN-DEDD2 | 318 | DEDD                               | vertebrata | Myotis davidii        | PREDICTED: death effector domain-containing protein [Myotis davidii]                                           | GCF_000327345.1  | TRADDN-DEDD2 |
| XP_006103322.1 | low-complexity+DED+TRADDN-DEDD2 | 318 | DEDD                               | vertebrata | Myotis lucifugus      | death effector domain-containing protein isoform X1 [Myotis lucifugus]                                         | GCF_000147115.1  | TRADDN-DEDD2 |



| acc            | architecture                    | len | gen.name    | taxend     | species                     | define                                                                                            | gca             | clade        |
|----------------|---------------------------------|-----|-------------|------------|-----------------------------|---------------------------------------------------------------------------------------------------|-----------------|--------------|
| XP_023600366.1 | low-complexity+DED+TRADDN-DEDD2 | 282 | DEDD        | vertebrata | Myotis lucifugus            | death effector domain-containing protein isoform X2 [Myotis lucifugus]                            | GCF_000147115.1 | TRADDN-DEDD2 |
| XP_023600627.1 | low-complexity+DED+TRADDN-DEDD2 | 335 | DEDD2       | vertebrata | Myotis lucifugus            | DNA-binding death effector domain-containing protein 2 isoform X1 [Myotis lucifugus]              | GCF_000147115.1 | TRADDN-DEDD2 |
| XP_023600630.1 | low-complexity+DED+TRADDN-DEDD2 | 327 | DEDD2       | vertebrata | Myotis lucifugus            | DNA-binding death effector domain-containing protein 2 isoform X2 [Myotis lucifugus]              | GCF_000147115.1 | TRADDN-DEDD2 |
| XP_008844653.1 | low-complexity+DED+TRADDN-DEDD2 | 329 | Dedd2       | vertebrata | Nannospalax galili          | PREDICTED: DNA-binding death effector domain-containing protein 2 isoform X1 [Nannospalax galili] | GCF_000622305.1 | TRADDN-DEDD2 |
| XP_008844655.1 | low-complexity+DED+TRADDN-DEDD2 | 334 | Dedd2       | vertebrata | Nannospalax galili          | PREDICTED: DNA-binding death effector domain-containing protein 2 isoform X4 [Nannospalax galili] | GCF_000622305.1 | TRADDN-DEDD2 |
| XP_008846226.1 | low-complexity+DED+TRADDN-DEDD2 | 318 | Dedd        | vertebrata | Nannospalax galili          | PREDICTED: death effector domain-containing protein [Nannospalax galili]                          | GCF_000622305.1 | TRADDN-DEDD2 |
| XP_017656942.1 | low-complexity+DED+TRADDN-DEDD2 | 280 | Dedd2       | vertebrata | Nannospalax galili          | PREDICTED: DNA-binding death effector domain-containing protein 2 isoform X2 [Nannospalax galili] | GCF_000622305.1 | TRADDN-DEDD2 |
| XP_017656943.1 | low-complexity+DED+TRADDN-DEDD2 | 275 | Dedd2       | vertebrata | Nannospalax galili          | PREDICTED: DNA-binding death effector domain-containing protein 2 isoform X3 [Nannospalax galili] | GCF_000622305.1 | TRADDN-DEDD2 |
| XP_018410288.1 | low-complexity+DED+TRADDN-DEDD2 | 353 | DEDD2       | vertebrata | Nanorana parkeri            | PREDICTED: DNA-binding death effector domain-containing protein 2 [Nanorana parkeri]              | GCF_000935625.1 | TRADDN-DEDD2 |
| XP_018427058.1 | low-complexity+DED+TRADDN-DEDD2 | 318 | DEDD        | vertebrata | Nanorana parkeri            | PREDICTED: death effector domain-containing protein [Nanorana parkeri]                            | GCF_000935625.1 | TRADDN-DEDD2 |
| XP_021547923.1 | low-complexity+DED+TRADDN-DEDD2 | 327 | DEDD2       | vertebrata | Neomonachus schauinslandi   | DNA-binding death effector domain-containing protein 2 isoform X1 [Neomonachus schauinslandi]     | GCF_002201575.1 | TRADDN-DEDD2 |
| XP_024624548.1 | low-complexity+DED+TRADDN-DEDD2 | 323 | DEDD2       | vertebrata | Neophocaena asiaeorientalis | DNA-binding death effector domain-containing protein 2 isoform X1 [Neophocaena asiaeorientalis]   | GCF_003031525.1 | TRADDN-DEDD2 |
| XP_024624549.1 | low-complexity+DED+TRADDN-DEDD2 | 318 | DEDD2       | vertebrata | Neophocaena asiaeorientalis | DNA-binding death effector domain-containing protein 2 isoform X2 [Neophocaena asiaeorientalis]   | GCF_003031525.1 | TRADDN-DEDD2 |
| OBS72595.1     | low-complexity+DED+TRADDN-DEDD2 | 335 | A6R68_12808 | vertebrata | Neotoma lepida              | hypothetical protein A6R68_12808 [Neotoma lepida]                                                 | GCA_001675575.1 | TRADDN-DEDD2 |
| OBS82753.1     | low-complexity+DED+TRADDN-DEDD2 | 318 | A6R68_23240 | vertebrata | Neotoma lepida              | hypothetical protein A6R68_23240 [Neotoma lepida]                                                 | GCA_001675575.1 | TRADDN-DEDD2 |
| XP_009465339.1 | low-complexity+DED+TRADDN-DEDD2 | 318 | DEDD        | vertebrata | Nipponia nippon             | PREDICTED: death effector domain-containing protein [Nipponia nippon]                             | GCF_000708225.1 | TRADDN-DEDD2 |
| XP_003258780.1 | low-complexity+DED+TRADDN-DEDD2 | 318 | DEDD        | vertebrata | Nomascus leucogenys         | PREDICTED: LOW QUALITY PROTEIN: death effector domain-containing protein [Nomascus leucogenys]    | -               | TRADDN-DEDD2 |

| acc            | architecture                    | len | gen.name | taxend     | species                        | define                                                                                             | gca             | clade        |
|----------------|---------------------------------|-----|----------|------------|--------------------------------|----------------------------------------------------------------------------------------------------|-----------------|--------------|
| XP_003281023.1 | low-complexity+DED+TRADDN-DEDD2 | 344 | DEDD2    | vertebrata | Nomascus leucogenys            | PREDICTED: DNA-binding death effector domain-containing protein 2 isoform X2 [Nomascus leucogenys] | -               | TRADDN-DEDD2 |
| XP_012352165.1 | low-complexity+DED+TRADDN-DEDD2 | 361 | DEDD2    | vertebrata | Nomascus leucogenys            | PREDICTED: DNA-binding death effector domain-containing protein 2 isoform X1 [Nomascus leucogenys] | -               | TRADDN-DEDD2 |
| XP_026537206.1 | low-complexity+DED+TRADDN-DEDD2 | 362 | DEDD2    | vertebrata | Notechis scutatus              | DNA-binding death effector domain-containing protein 2 [Notechis scutatus]                         | GCF_900518725.1 | TRADDN-DEDD2 |
| XP_026547675.1 | low-complexity+DED+TRADDN-DEDD2 | 331 | DEDD     | vertebrata | Notechis scutatus              | death effector domain-containing protein [Notechis scutatus]                                       | GCF_900518725.1 | TRADDN-DEDD2 |
| XP_025904294.1 | low-complexity+DED+TRADDN-DEDD2 | 318 | DEDD     | vertebrata | Nothoprocta perdicaria         | death effector domain-containing protein [Nothoprocta perdicaria]                                  | GCF_003342845.1 | TRADDN-DEDD2 |
| XP_021232088.1 | low-complexity+DED+TRADDN-DEDD2 | 318 | DEDD     | vertebrata | Numida meleagris               | death effector domain-containing protein [Numida meleagris]                                        | GCF_002078875.1 | TRADDN-DEDD2 |
| XP_004589156.1 | low-complexity+DED+TRADDN-DEDD2 | 318 | DEDD     | vertebrata | Ochotona princeps              | PREDICTED: death effector domain-containing protein isoform X1 [Ochotona princeps]                 | GCF_000292845.1 | TRADDN-DEDD2 |
| XP_004589158.1 | low-complexity+DED+TRADDN-DEDD2 | 275 | DEDD     | vertebrata | Ochotona princeps              | PREDICTED: death effector domain-containing protein isoform X2 [Ochotona princeps]                 | GCF_000292845.1 | TRADDN-DEDD2 |
| XP_004598037.1 | low-complexity+DED+TRADDN-DEDD2 | 333 | DEDD2    | vertebrata | Ochotona princeps              | PREDICTED: DNA-binding death effector domain-containing protein 2 isoform X1 [Ochotona princeps]   | GCF_000292845.1 | TRADDN-DEDD2 |
| XP_004598038.1 | low-complexity+DED+TRADDN-DEDD2 | 328 | DEDD2    | vertebrata | Ochotona princeps              | PREDICTED: DNA-binding death effector domain-containing protein 2 isoform X2 [Ochotona princeps]   | GCF_000292845.1 | TRADDN-DEDD2 |
| XP_004639969.1 | low-complexity+DED+TRADDN-DEDD2 | 318 | Dedd     | vertebrata | Octodon degus                  | death effector domain-containing protein [Octodon degus]                                           | GCF_000260255.1 | TRADDN-DEDD2 |
| XP_004644421.1 | low-complexity+DED+TRADDN-DEDD2 | 331 | Dedd2    | vertebrata | Octodon degus                  | DNA-binding death effector domain-containing protein 2 [Octodon degus]                             | GCF_000260255.1 | TRADDN-DEDD2 |
| XP_004407955.1 | low-complexity+DED+TRADDN-DEDD2 | 318 | DEDD     | vertebrata | Odobenus rosmarus divergens    | PREDICTED: death effector domain-containing protein isoform X1 [Odobenus rosmarus divergens]       | GCF_000321225.1 | TRADDN-DEDD2 |
| XP_004407956.1 | low-complexity+DED+TRADDN-DEDD2 | 312 | DEDD     | vertebrata | Odobenus rosmarus divergens    | PREDICTED: death effector domain-containing protein isoform X2 [Odobenus rosmarus divergens]       | GCF_000321225.1 | TRADDN-DEDD2 |
| XP_004407957.1 | low-complexity+DED+TRADDN-DEDD2 | 275 | DEDD     | vertebrata | Odobenus rosmarus divergens    | PREDICTED: death effector domain-containing protein isoform X3 [Odobenus rosmarus divergens]       | GCF_000321225.1 | TRADDN-DEDD2 |
| XP_004408213.1 | low-complexity+DED+TRADDN-DEDD2 | 327 | DEDD2    | vertebrata | Odobenus rosmarus divergens    | PREDICTED: DNA-binding death effector domain-containing protein 2 [Odobenus rosmarus divergens]    | GCF_000321225.1 | TRADDN-DEDD2 |
| XP_020726806.1 | low-complexity+DED+TRADDN-DEDD2 | 327 | DEDD2    | vertebrata | Odocoileus virginianus texanus | DNA-binding death effector domain-containing protein 2 [Odocoileus virginianus texanus]            | GCF_002102435.1 | TRADDN-DEDD2 |
| XP_020744941.1 | low-complexity+DED+TRADDN-DEDD2 | 318 | DEDD     | vertebrata | Odocoileus virginianus texanus | death effector domain-containing protein isoform X1 [Odocoileus virginianus texanus]               | GCF_002102435.1 | TRADDN-DEDD2 |

| acc            | architecture                    | len | gen.name | taxend     | species                        | define                                                                                               | gca             | clade        |
|----------------|---------------------------------|-----|----------|------------|--------------------------------|------------------------------------------------------------------------------------------------------|-----------------|--------------|
| XP_020744947.1 | low-complexity+DED+TRADDN-DEDD2 | 312 | DEDD     | vertebrata | Odocoileus virginianus texanus | death effector domain-containing protein isoform X2 [Odocoileus virginianus texanus]                 | GCF_002102435.1 | TRADDN-DEDD2 |
| XP_004284454.1 | low-complexity+DED+TRADDN-DEDD2 | 318 | DEDD     | vertebrata | Orcinus orca                   | PREDICTED: death effector domain-containing protein isoform X1 [Orcinus orca]                        | GCF_000331955.2 | TRADDN-DEDD2 |
| XP_012389054.1 | low-complexity+DED+TRADDN-DEDD2 | 323 | DEDD2    | vertebrata | Orcinus orca                   | PREDICTED: DNA-binding death effector domain-containing protein 2 [Orcinus orca]                     | GCF_000331955.2 | TRADDN-DEDD2 |
| XP_012393971.1 | low-complexity+DED+TRADDN-DEDD2 | 275 | DEDD     | vertebrata | Orcinus orca                   | PREDICTED: death effector domain-containing protein isoform X2 [Orcinus orca]                        | GCF_000331955.2 | TRADDN-DEDD2 |
| XP_007941131.1 | low-complexity+DED+TRADDN-DEDD2 | 329 | DEDD2    | vertebrata | Orycteropus afer afer          | PREDICTED: DNA-binding death effector domain-containing protein 2 isoform X1 [Orycteropus afer afer] | GCF_000298275.1 | TRADDN-DEDD2 |
| XP_007941132.1 | low-complexity+DED+TRADDN-DEDD2 | 324 | DEDD2    | vertebrata | Orycteropus afer afer          | PREDICTED: DNA-binding death effector domain-containing protein 2 isoform X2 [Orycteropus afer afer] | GCF_000298275.1 | TRADDN-DEDD2 |
| XP_007945916.1 | low-complexity+DED+TRADDN-DEDD2 | 318 | DEDD     | vertebrata | Orycteropus afer afer          | PREDICTED: death effector domain-containing protein isoform X1 [Orycteropus afer afer]               | GCF_000298275.1 | TRADDN-DEDD2 |
| XP_007945918.1 | low-complexity+DED+TRADDN-DEDD2 | 275 | DEDD     | vertebrata | Orycteropus afer afer          | PREDICTED: death effector domain-containing protein isoform X2 [Orycteropus afer afer]               | GCF_000298275.1 | TRADDN-DEDD2 |
| XP_002722349.3 | low-complexity+DED+TRADDN-DEDD2 | 338 | DEDD2    | vertebrata | Oryctolagus cuniculus          | PREDICTED: DNA-binding death effector domain-containing protein 2 isoform X2 [Oryctolagus cuniculus] | GCF_000003625.3 | TRADDN-DEDD2 |
| XP_008247900.2 | low-complexity+DED+TRADDN-DEDD2 | 346 | DEDD2    | vertebrata | Oryctolagus cuniculus          | PREDICTED: DNA-binding death effector domain-containing protein 2 isoform X1 [Oryctolagus cuniculus] | GCF_000003625.3 | TRADDN-DEDD2 |
| XP_003785827.1 | low-complexity+DED+TRADDN-DEDD2 | 318 | DEDD     | vertebrata | Otolemur garnettii             | death effector domain-containing protein [Otolemur garnettii]                                        | GCF_000181295.1 | TRADDN-DEDD2 |
| XP_003799518.1 | low-complexity+DED+TRADDN-DEDD2 | 326 | DEDD2    | vertebrata | Otolemur garnettii             | DNA-binding death effector domain-containing protein 2 [Otolemur garnettii]                          | GCF_000181295.1 | TRADDN-DEDD2 |
| XP_004015335.2 | low-complexity+DED+TRADDN-DEDD2 | 286 | DEDD2    | vertebrata | Ovis aries                     | PREDICTED: LOW QUALITY PROTEIN: DNA-binding death effector domain-containing protein 2 [Ovis aries]  | -               | TRADDN-DEDD2 |
| XP_012040120.1 | low-complexity+DED+TRADDN-DEDD2 | 358 | DEDD     | vertebrata | Ovis aries                     | PREDICTED: death effector domain-containing protein isoform X1 [Ovis aries]                          | -               | TRADDN-DEDD2 |
| XP_012017925.1 | low-complexity+DED+TRADDN-DEDD2 | 326 | DEDD2    | vertebrata | Ovis aries musimon             | PREDICTED: DNA-binding death effector domain-containing protein 2 [Ovis aries musimon]               | -               | TRADDN-DEDD2 |
| XP_012023522.1 | low-complexity+DED+TRADDN-DEDD2 | 318 | DEDD     | vertebrata | Ovis aries musimon             | PREDICTED: death effector domain-containing protein isoform X2 [Ovis aries musimon]                  | -               | TRADDN-DEDD2 |
| XP_003811820.1 | low-complexity+DED+TRADDN-DEDD2 | 326 | DEDD2    | vertebrata | Pan paniscus                   | DNA-binding death effector domain-containing protein 2 isoform X1 [Pan paniscus]                     | GCF_000258655.2 | TRADDN-DEDD2 |

| acc            | architecture                    | len | gen.name       | taxend     | species                        | define                                                                                                           | gca             | clade        |
|----------------|---------------------------------|-----|----------------|------------|--------------------------------|------------------------------------------------------------------------------------------------------------------|-----------------|--------------|
| XP_008962420.1 | low-complexity+DED+TRADDN-DEDD2 | 321 | DEDD2          | vertebrata | Pan paniscus                   | DNA-binding death effector domain-containing protein 2 isoform X2 [Pan paniscus]                                 | GCF_000258655.2 | TRADDN-DEDD2 |
| PNI19827.1     | low-complexity+DED+TRADDN-DEDD2 | 287 | CK820_G0049338 | vertebrata | Pan troglodytes                | DEDD isoform 9, partial [Pan troglodytes]                                                                        | GCA_002880755.3 | TRADDN-DEDD2 |
| XP_019288765.1 | low-complexity+DED+TRADDN-DEDD2 | 318 | DEDD           | vertebrata | Panthera pardus                | PREDICTED: death effector domain-containing protein [Panthera pardus]                                            | GCF_001857705.1 | TRADDN-DEDD2 |
| XP_019289993.1 | low-complexity+DED+TRADDN-DEDD2 | 327 | DEDD2          | vertebrata | Panthera pardus                | PREDICTED: DNA-binding death effector domain-containing protein 2 [Panthera pardus]                              | GCF_001857705.1 | TRADDN-DEDD2 |
| XP_007086659.1 | low-complexity+DED+TRADDN-DEDD2 | 295 | DEDD2          | vertebrata | Panthera tigris altaica        | PREDICTED: LOW QUALITY PROTEIN: DNA-binding death effector domain-containing protein 2 [Panthera tigris altaica] | GCF_000464555.1 | TRADDN-DEDD2 |
| XP_007093104.1 | low-complexity+DED+TRADDN-DEDD2 | 302 | DEDD           | vertebrata | Panthera tigris altaica        | PREDICTED: death effector domain-containing protein, partial [Panthera tigris altaica]                           | GCF_000464555.1 | TRADDN-DEDD2 |
| XP_005958871.1 | low-complexity+DED+TRADDN-DEDD2 | 318 | DEDD           | vertebrata | Pantholops hodgsonii           | PREDICTED: death effector domain-containing protein isoform X1 [Pantholops hodgsonii]                            | -               | TRADDN-DEDD2 |
| XP_005958872.1 | low-complexity+DED+TRADDN-DEDD2 | 312 | DEDD           | vertebrata | Pantholops hodgsonii           | PREDICTED: death effector domain-containing protein isoform X2 [Pantholops hodgsonii]                            | -               | TRADDN-DEDD2 |
| XP_005958873.1 | low-complexity+DED+TRADDN-DEDD2 | 275 | DEDD           | vertebrata | Pantholops hodgsonii           | PREDICTED: death effector domain-containing protein isoform X3 [Pantholops hodgsonii]                            | -               | TRADDN-DEDD2 |
| XP_005971433.1 | low-complexity+DED+TRADDN-DEDD2 | 326 | DEDD2          | vertebrata | Pantholops hodgsonii           | PREDICTED: DNA-binding death effector domain-containing protein 2 [Pantholops hodgsonii]                         | -               | TRADDN-DEDD2 |
| XP_003915662.1 | low-complexity+DED+TRADDN-DEDD2 | 326 | DEDD2          | vertebrata | Papio anubis                   | DNA-binding death effector domain-containing protein 2 isoform X1 [Papio anubis]                                 | GCF_000264685.3 | TRADDN-DEDD2 |
| XP_009192863.1 | low-complexity+DED+TRADDN-DEDD2 | 279 | DEDD2          | vertebrata | Papio anubis                   | DNA-binding death effector domain-containing protein 2 isoform X2 [Papio anubis]                                 | GCF_000264685.3 | TRADDN-DEDD2 |
| XP_006113986.1 | low-complexity+DED+TRADDN-DEDD2 | 318 | DEDD           | vertebrata | Pelodiscus sinensis            | death effector domain-containing protein [Pelodiscus sinensis]                                                   | GCF_000230535.1 | TRADDN-DEDD2 |
| XP_006127950.1 | low-complexity+DED+TRADDN-DEDD2 | 359 | DEDD2          | vertebrata | Pelodiscus sinensis            | DNA-binding death effector domain-containing protein 2 [Pelodiscus sinensis]                                     | GCF_000230535.1 | TRADDN-DEDD2 |
| XP_006988136.1 | low-complexity+DED+TRADDN-DEDD2 | 329 | Dedd2          | vertebrata | Peromyscus maniculatus bairdii | PREDICTED: DNA-binding death effector domain-containing protein 2 [Peromyscus maniculatus bairdii]               | GCF_000500345.1 | TRADDN-DEDD2 |
| XP_006990684.1 | low-complexity+DED+TRADDN-DEDD2 | 318 | Dedd           | vertebrata | Peromyscus maniculatus bairdii | PREDICTED: death effector domain-containing protein isoform X1 [Peromyscus maniculatus bairdii]                  | GCF_000500345.1 | TRADDN-DEDD2 |
| XP_015864395.1 | low-complexity+DED+TRADDN-DEDD2 | 305 | Dedd           | vertebrata | Peromyscus maniculatus bairdii | PREDICTED: death effector domain-containing protein isoform X2 [Peromyscus maniculatus bairdii]                  | GCF_000500345.1 | TRADDN-DEDD2 |

| acc            | architecture                    | len | gen.name       | taxend     | species                      | define                                                                                               | gca             | clade        |
|----------------|---------------------------------|-----|----------------|------------|------------------------------|------------------------------------------------------------------------------------------------------|-----------------|--------------|
| XP_010292665.1 | low-complexity+DED+TRADDN-DEDD2 | 318 | DEDD           | vertebrata | Phaethon lepturus            | PREDICTED: death effector domain-containing protein [Phaethon lepturus]                              | GCF_000687285.1 | TRADDN-DEDD2 |
| XP_020827647.1 | low-complexity+DED+TRADDN-DEDD2 | 334 | DEDD           | vertebrata | Phascolarctos cinereus       | death effector domain-containing protein isoform X1 [Phascolarctos cinereus]                         | GCF_002099425.1 | TRADDN-DEDD2 |
| XP_020827649.1 | low-complexity+DED+TRADDN-DEDD2 | 318 | DEDD           | vertebrata | Phascolarctos cinereus       | death effector domain-containing protein isoform X3 [Phascolarctos cinereus]                         | GCF_002099425.1 | TRADDN-DEDD2 |
| XP_020859458.1 | low-complexity+DED+TRADDN-DEDD2 | 393 | DEDD2          | vertebrata | Phascolarctos cinereus       | LOW QUALITY PROTEIN: DNA-binding death effector domain-containing protein 2 [Phascolarctos cinereus] | GCF_002099425.1 | TRADDN-DEDD2 |
| XP_007102243.2 | low-complexity+DED+TRADDN-DEDD2 | 327 | DEDD2          | vertebrata | Physeter catodon             | DNA-binding death effector domain-containing protein 2 [Physeter catodon]                            | GCF_002837175.2 | TRADDN-DEDD2 |
| XP_023070073.1 | low-complexity+DED+TRADDN-DEDD2 | 312 | DEDD           | vertebrata | Piliocolobus tephrosceles    | death effector domain-containing protein isoform X2 [Piliocolobus tephrosceles]                      | GCF_002776525.2 | TRADDN-DEDD2 |
| XP_020663564.1 | low-complexity+DED+TRADDN-DEDD2 | 363 | DEDD2          | vertebrata | Pogona vitticeps             | DNA-binding death effector domain-containing protein 2 [Pogona vitticeps]                            | GCF_900067755.1 | TRADDN-DEDD2 |
| NP_001126047.1 | low-complexity+DED+TRADDN-DEDD2 | 318 | DEDD           | vertebrata | Pongo abelii                 | death effector domain-containing protein [Pongo abelii]                                              | GCF_002880775.1 | TRADDN-DEDD2 |
| PNJ19230.1     | low-complexity+DED+TRADDN-DEDD2 | 321 | CR201_G0044088 | vertebrata | Pongo abelii                 | DEDD2 isoform 1 [Pongo abelii]                                                                       | GCA_002880775.3 | TRADDN-DEDD2 |
| PNJ57085.1     | low-complexity+DED+TRADDN-DEDD2 | 348 | CR201_G0019390 | vertebrata | Pongo abelii                 | DEDD isoform 8 [Pongo abelii]                                                                        | GCA_002880775.3 | TRADDN-DEDD2 |
| PNJ57086.1     | low-complexity+DED+TRADDN-DEDD2 | 287 | CR201_G0019390 | vertebrata | Pongo abelii                 | DEDD isoform 9, partial [Pongo abelii]                                                               | GCA_002880775.3 | TRADDN-DEDD2 |
| XP_009230944.2 | low-complexity+DED+TRADDN-DEDD2 | 326 | DEDD2          | vertebrata | Pongo abelii                 | DNA-binding death effector domain-containing protein 2 [Pongo abelii]                                | GCF_002880775.1 | TRADDN-DEDD2 |
| XP_024113149.1 | low-complexity+DED+TRADDN-DEDD2 | 318 | DEDD           | vertebrata | Pongo abelii                 | death effector domain-containing protein isoform X1 [Pongo abelii]                                   | GCF_002880775.1 | TRADDN-DEDD2 |
| XP_012508808.1 | low-complexity+DED+TRADDN-DEDD2 | 326 | DEDD2          | vertebrata | Propithecus coquereli        | PREDICTED: DNA-binding death effector domain-containing protein 2 [Propithecus coquereli]            | GCF_000956105.1 | TRADDN-DEDD2 |
| XP_015678489.1 | low-complexity+DED+TRADDN-DEDD2 | 318 | DEDD           | vertebrata | Protobothrops mucrosquamatus | PREDICTED: death effector domain-containing protein [Protobothrops mucrosquamatus]                   | GCF_001527695.2 | TRADDN-DEDD2 |
| XP_015681195.1 | low-complexity+DED+TRADDN-DEDD2 | 363 | DEDD2          | vertebrata | Protobothrops mucrosquamatus | PREDICTED: DNA-binding death effector domain-containing protein 2 [Protobothrops mucrosquamatus]     | GCF_001527695.2 | TRADDN-DEDD2 |
| XP_026571203.1 | low-complexity+DED+TRADDN-DEDD2 | 362 | DEDD2          | vertebrata | Pseudonaja textilis          | DNA-binding death effector domain-containing protein 2 [Pseudonaja textilis]                         | GCF_900518735.1 | TRADDN-DEDD2 |
| XP_026573488.1 | low-complexity+DED+TRADDN-DEDD2 | 355 | DEDD           | vertebrata | Pseudonaja textilis          | death effector domain-containing protein isoform X1 [Pseudonaja textilis]                            | GCF_900518735.1 | TRADDN-DEDD2 |
| XP_026573489.1 | low-complexity+DED+TRADDN-DEDD2 | 362 | DEDD           | vertebrata | Pseudonaja textilis          | death effector domain-containing protein isoform X2 [Pseudonaja textilis]                            | GCF_900518735.1 | TRADDN-DEDD2 |

| acc            | architecture                    | len | gen.name     | taxend     | species                        | define                                                                                                  | gca             | clade        |
|----------------|---------------------------------|-----|--------------|------------|--------------------------------|---------------------------------------------------------------------------------------------------------|-----------------|--------------|
| XP_014117322.1 | low-complexity+DED+TRADDN-DEDD2 | 322 | DEDD         | vertebrata | <i>Pseudopodoces humilis</i>   | PREDICTED: death effector domain-containing protein isoform X1 [ <i>Pseudopodoces humilis</i> ]         | GCF_000331425.1 | TRADDN-DEDD2 |
| XP_014117323.1 | low-complexity+DED+TRADDN-DEDD2 | 323 | DEDD         | vertebrata | <i>Pseudopodoces humilis</i>   | PREDICTED: death effector domain-containing protein isoform X2 [ <i>Pseudopodoces humilis</i> ]         | GCF_000331425.1 | TRADDN-DEDD2 |
| XP_014118337.1 | low-complexity+DED+TRADDN-DEDD2 | 357 | LOC102110117 | vertebrata | <i>Pseudopodoces humilis</i>   | PREDICTED: DNA-binding death effector domain-containing protein 2-like [ <i>Pseudopodoces humilis</i> ] | GCF_000331425.1 | TRADDN-DEDD2 |
| XP_006903926.1 | low-complexity+DED+TRADDN-DEDD2 | 326 | DEDD2        | vertebrata | <i>Pteropus alecto</i>         | DNA-binding death effector domain-containing protein 2 [ <i>Pteropus alecto</i> ]                       | GCF_000325575.1 | TRADDN-DEDD2 |
| XP_006907932.1 | low-complexity+DED+TRADDN-DEDD2 | 318 | DEDD         | vertebrata | <i>Pteropus alecto</i>         | death effector domain-containing protein [ <i>Pteropus alecto</i> ]                                     | GCF_000325575.1 | TRADDN-DEDD2 |
| XP_011381121.1 | low-complexity+DED+TRADDN-DEDD2 | 326 | DEDD2        | vertebrata | <i>Pteropus vampyrus</i>       | DNA-binding death effector domain-containing protein 2 [ <i>Pteropus vampyrus</i> ]                     | GCF_000151845.1 | TRADDN-DEDD2 |
| XP_025769996.1 | low-complexity+DED+TRADDN-DEDD2 | 327 | DEDD2        | vertebrata | <i>Puma concolor</i>           | DNA-binding death effector domain-containing protein 2 [ <i>Puma concolor</i> ]                         | GCF_003327715.1 | TRADDN-DEDD2 |
| XP_025771039.1 | low-complexity+DED+TRADDN-DEDD2 | 319 | DEDD         | vertebrata | <i>Puma concolor</i>           | LOW QUALITY PROTEIN: death effector domain-containing protein [ <i>Puma concolor</i> ]                  | GCF_003327715.1 | TRADDN-DEDD2 |
| XP_007438974.1 | low-complexity+DED+TRADDN-DEDD2 | 355 | DEDD         | vertebrata | <i>Python bivittatus</i>       | death effector domain-containing protein [ <i>Python bivittatus</i> ]                                   | GCF_000186305.1 | TRADDN-DEDD2 |
| XP_007442354.1 | low-complexity+DED+TRADDN-DEDD2 | 362 | DEDD2        | vertebrata | <i>Python bivittatus</i>       | DNA-binding death effector domain-containing protein 2 [ <i>Python bivittatus</i> ]                     | GCF_000186305.1 | TRADDN-DEDD2 |
| NP_113988.1    | low-complexity+DED+TRADDN-DEDD2 | 318 | Deft         | vertebrata | <i>Rattus norvegicus</i>       | death effector domain-containing protein [ <i>Rattus norvegicus</i> ]                                   | GCF_000002265.2 | TRADDN-DEDD2 |
| XP_003753272.1 | low-complexity+DED+TRADDN-DEDD2 | 331 | Dedd2        | vertebrata | <i>Rattus norvegicus</i>       | PREDICTED: DNA-binding death effector domain-containing protein 2 [ <i>Rattus norvegicus</i> ]          | GCF_000002265.2 | TRADDN-DEDD2 |
| XP_020380645.1 | low-complexity+DED+TRADDN-DEDD2 | 314 | dedd         | vertebrata | <i>Rhincodon typus</i>         | death effector domain-containing protein [ <i>Rhincodon typus</i> ]                                     | GCF_001642345.1 | TRADDN-DEDD2 |
| XP_020381127.1 | low-complexity+DED+TRADDN-DEDD2 | 346 | LOC109925611 | vertebrata | <i>Rhincodon typus</i>         | DNA-binding death effector domain-containing protein 2-like [ <i>Rhincodon typus</i> ]                  | GCF_001642345.1 | TRADDN-DEDD2 |
| XP_019568501.1 | low-complexity+DED+TRADDN-DEDD2 | 318 | DEDD         | vertebrata | <i>Rhinolophus sinicus</i>     | PREDICTED: death effector domain-containing protein [ <i>Rhinolophus sinicus</i> ]                      | -               | TRADDN-DEDD2 |
| XP_019569316.1 | low-complexity+DED+TRADDN-DEDD2 | 331 | DEDD2        | vertebrata | <i>Rhinolophus sinicus</i>     | PREDICTED: DNA-binding death effector domain-containing protein 2 [ <i>Rhinolophus sinicus</i> ]        | -               | TRADDN-DEDD2 |
| XP_010357226.1 | low-complexity+DED+TRADDN-DEDD2 | 326 | DEDD2        | vertebrata | <i>Rhinopithecus roxellana</i> | PREDICTED: DNA-binding death effector domain-containing protein 2 [ <i>Rhinopithecus roxellana</i> ]    | GCF_007565055.1 | TRADDN-DEDD2 |
| XP_010365416.1 | low-complexity+DED+TRADDN-DEDD2 | 282 | DEDD         | vertebrata | <i>Rhinopithecus roxellana</i> | PREDICTED: death effector domain-containing protein isoform X2 [ <i>Rhinopithecus roxellana</i> ]       | -               | TRADDN-DEDD2 |

| acc            | architecture                    | len | gen.name     | taxend     | species                        | define                                                                                              | gca             | clade        |
|----------------|---------------------------------|-----|--------------|------------|--------------------------------|-----------------------------------------------------------------------------------------------------|-----------------|--------------|
| XP_015985433.1 | low-complexity+DED+TRADDN-DEDD2 | 326 | DEDD2        | vertebrata | Rousettus aegyptiacus          | PREDICTED: DNA-binding death effector domain-containing protein 2 [Rousettus aegyptiacus]           | GCF_001466805.2 | TRADDN-DEDD2 |
| XP_015989540.1 | low-complexity+DED+TRADDN-DEDD2 | 318 | DEDD         | vertebrata | Rousettus aegyptiacus          | PREDICTED: death effector domain-containing protein [Rousettus aegyptiacus]                         | GCF_001466805.2 | TRADDN-DEDD2 |
| XP_003769678.1 | low-complexity+DED+TRADDN-DEDD2 | 318 | DEDD         | vertebrata | Sarcophilus harrisi            | death effector domain-containing protein [Sarcophilus harrisi]                                      | GCF_000189315.1 | TRADDN-DEDD2 |
| XP_004613810.1 | low-complexity+DED+TRADDN-DEDD2 | 318 | DEDD         | vertebrata | Sorex araneus                  | PREDICTED: death effector domain-containing protein [Sorex araneus]                                 | GCF_000181275.1 | TRADDN-DEDD2 |
| XP_004620755.1 | low-complexity+DED+TRADDN-DEDD2 | 327 | DEDD2        | vertebrata | Sorex araneus                  | PREDICTED: DNA-binding death effector domain-containing protein 2 isoform X1 [Sorex araneus]        | GCF_000181275.1 | TRADDN-DEDD2 |
| XP_004620756.1 | low-complexity+DED+TRADDN-DEDD2 | 322 | DEDD2        | vertebrata | Sorex araneus                  | PREDICTED: DNA-binding death effector domain-containing protein 2 isoform X2 [Sorex araneus]        | GCF_000181275.1 | TRADDN-DEDD2 |
| KFV72542.1     | low-complexity+DED+TRADDN-DEDD2 | 319 | N308_07951   | vertebrata | Struthio camelus australis     | Death effector domain-containing protein [Struthio camelus australis]                               | GCA_000698965.1 | TRADDN-DEDD2 |
| XP_009665721.1 | low-complexity+DED+TRADDN-DEDD2 | 318 | DEDD         | vertebrata | Struthio camelus australis     | PREDICTED: death effector domain-containing protein [Struthio camelus australis]                    | GCF_000698965.1 | TRADDN-DEDD2 |
| XP_014748917.1 | low-complexity+DED+TRADDN-DEDD2 | 319 | DEDD         | vertebrata | Sturnus vulgaris               | PREDICTED: death effector domain-containing protein [Sturnus vulgaris]                              | GCF_001447265.1 | TRADDN-DEDD2 |
| XP_001927399.1 | low-complexity+DED+TRADDN-DEDD2 | 318 | DEDD         | vertebrata | Sus scrofa                     | death effector domain-containing protein [Sus scrofa]                                               | GCF_000003025.6 | TRADDN-DEDD2 |
| XP_013844083.2 | low-complexity+DED+TRADDN-DEDD2 | 326 | DEDD2        | vertebrata | Sus scrofa                     | LOW QUALITY PROTEIN: DNA-binding death effector domain-containing protein 2 [Sus scrofa]            | GCF_000003025.6 | TRADDN-DEDD2 |
| XP_004174339.1 | low-complexity+DED+TRADDN-DEDD2 | 332 | LOC100225852 | vertebrata | Taeniopygia guttata            | PREDICTED: LOW QUALITY PROTEIN: death effector domain-containing protein-like [Taeniopygia guttata] | -               | TRADDN-DEDD2 |
| XP_026515566.1 | low-complexity+DED+TRADDN-DEDD2 | 333 | DEDD         | vertebrata | Terrapene mexicana triunguis   | death effector domain-containing protein [Terrapene mexicana triunguis]                             | -               | TRADDN-DEDD2 |
| XP_013927334.1 | low-complexity+DED+TRADDN-DEDD2 | 363 | DEDD2        | vertebrata | Thamnophis sirtalis            | PREDICTED: DNA-binding death effector domain-containing protein 2 [Thamnophis sirtalis]             | GCF_001077635.1 | TRADDN-DEDD2 |
| XP_025214868.1 | low-complexity+DED+TRADDN-DEDD2 | 275 | DEDD         | vertebrata | Theropithecus gelada           | death effector domain-containing protein isoform X3 [Theropithecus gelada]                          | GCF_003255815.1 | TRADDN-DEDD2 |
| XP_025222042.1 | low-complexity+DED+TRADDN-DEDD2 | 326 | DEDD2        | vertebrata | Theropithecus gelada           | DNA-binding death effector domain-containing protein 2 [Theropithecus gelada]                       | GCF_003255815.1 | TRADDN-DEDD2 |
| XP_004388812.1 | low-complexity+DED+TRADDN-DEDD2 | 327 | LOC101346351 | vertebrata | Trichechus manatus latirostris | DNA-binding death effector domain-containing protein 2 isoform X1 [Trichechus manatus latirostris]  | GCF_000243295.1 | TRADDN-DEDD2 |

| acc            | architecture                    | len | gen.name          | taxend     | species                        | define                                                                                            | gca             | clade        |
|----------------|---------------------------------|-----|-------------------|------------|--------------------------------|---------------------------------------------------------------------------------------------------|-----------------|--------------|
| XP_004390231.1 | low-complexity+DED+TRADDN-DEDD2 | 318 | LOC101349768      | vertebrata | Trichechus manatus latirostris | death effector domain-containing protein [Trichechus manatus latirostris]                         | GCF_000243295.1 | TRADDN-DEDD2 |
| ELW71049.1     | low-complexity+DED+TRADDN-DEDD2 | 282 | TREES_T100011471  | vertebrata | Tupaia chinensis               | DNA-binding death effector domain-containing protein 2 [Tupaia chinensis]                         | GCA_000334495.1 | TRADDN-DEDD2 |
| XP_006142066.1 | low-complexity+DED+TRADDN-DEDD2 | 326 | DEDD2             | vertebrata | Tupaia chinensis               | PREDICTED: DNA-binding death effector domain-containing protein 2 isoform X1 [Tupaia chinensis]   | GCF_000334495.1 | TRADDN-DEDD2 |
| XP_006163170.1 | low-complexity+DED+TRADDN-DEDD2 | 318 | DEDD              | vertebrata | Tupaia chinensis               | PREDICTED: death effector domain-containing protein [Tupaia chinensis]                            | GCF_000334495.1 | TRADDN-DEDD2 |
| XP_004321849.1 | low-complexity+DED+TRADDN-DEDD2 | 318 | DEDD              | vertebrata | Tursiops truncatus             | PREDICTED: death effector domain-containing protein [Tursiops truncatus]                          | -               | TRADDN-DEDD2 |
| XP_008698884.1 | low-complexity+DED+TRADDN-DEDD2 | 318 | DEDD              | vertebrata | Ursus maritimus                | PREDICTED: death effector domain-containing protein [Ursus maritimus]                             | GCF_000687225.1 | TRADDN-DEDD2 |
| XP_008707915.1 | low-complexity+DED+TRADDN-DEDD2 | 330 | DEDD2             | vertebrata | Ursus maritimus                | PREDICTED: DNA-binding death effector domain-containing protein 2 [Ursus maritimus]               | GCF_000687225.1 | TRADDN-DEDD2 |
| XP_006208797.1 | low-complexity+DED+TRADDN-DEDD2 | 303 | DEDD2             | vertebrata | Vicugna pacos                  | PREDICTED: DNA-binding death effector domain-containing protein 2 [Vicugna pacos]                 | GCF_000164845.2 | TRADDN-DEDD2 |
| XP_025869648.1 | low-complexity+DED+TRADDN-DEDD2 | 329 | DEDD2             | vertebrata | Vulpes vulpes                  | DNA-binding death effector domain-containing protein 2 [Vulpes vulpes]                            | GCF_003160815.1 | TRADDN-DEDD2 |
| NP_001088238.1 | low-complexity+DED+TRADDN-DEDD2 | 318 | dedd              | vertebrata | Xenopus laevis                 | death effector domain containing L homeolog [Xenopus laevis]                                      | GCF_001663975.1 | TRADDN-DEDD2 |
| NP_001088715.1 | low-complexity+DED+TRADDN-DEDD2 | 357 | dedd2             | vertebrata | Xenopus laevis                 | death effector domain containing 2 L homeolog [Xenopus laevis]                                    | GCF_001663975.1 | TRADDN-DEDD2 |
| NP_001088842.1 | low-complexity+DED+TRADDN-DEDD2 | 318 | dedd.S            | vertebrata | Xenopus laevis                 | uncharacterized protein LOC496151 [Xenopus laevis]                                                | GCF_001663975.1 | TRADDN-DEDD2 |
| OCT69466.1     | low-complexity+DED+TRADDN-DEDD2 | 318 | XELAEV_18040777mg | vertebrata | Xenopus laevis                 | hypothetical protein XELAEV_18040777mg [Xenopus laevis]                                           | GCA_001663975.1 | TRADDN-DEDD2 |
| OCT72981.1     | low-complexity+DED+TRADDN-DEDD2 | 357 | XELAEV_18035962mg | vertebrata | Xenopus laevis                 | hypothetical protein XELAEV_18035962mg [Xenopus laevis]                                           | GCA_001663975.1 | TRADDN-DEDD2 |
| XP_018082413.1 | low-complexity+DED+TRADDN-DEDD2 | 355 | MGC80767          | vertebrata | Xenopus laevis                 | PREDICTED: MGC80767 protein isoform X1 [Xenopus laevis]                                           | GCF_001663975.1 | TRADDN-DEDD2 |
| XP_002941793.3 | low-complexity+DED+TRADDN-DEDD2 | 318 | dedd              | vertebrata | Xenopus tropicalis             | PREDICTED: death effector domain-containing protein [Xenopus tropicalis]                          | GCF_000004195.3 | TRADDN-DEDD2 |
| XP_012822197.1 | low-complexity+DED+TRADDN-DEDD2 | 356 | dedd2             | vertebrata | Xenopus tropicalis             | PREDICTED: DNA-binding death effector domain-containing protein 2 isoform X1 [Xenopus tropicalis] | GCF_000004195.3 | TRADDN-DEDD2 |
| XP_014130289.1 | low-complexity+DED+TRADDN-DEDD2 | 329 | DEDD              | vertebrata | Zonotrichia albicollis         | death effector domain-containing protein [Zonotrichia albicollis]                                 | GCF_000385455.1 | TRADDN-DEDD2 |
| KFP69481.1     | TRADDN-DEDD2                    | 175 | N310_09166        | vertebrata | Acanthisitta chloris           | Death effector domain-containing protein, partial [Acanthisitta chloris]                          | GCA_000695815.1 | TRADDN-DEDD2 |



| acc            | architecture | len | gen.name      | taxend     | species                             | define                                                                                                                | gca             | clade        |
|----------------|--------------|-----|---------------|------------|-------------------------------------|-----------------------------------------------------------------------------------------------------------------------|-----------------|--------------|
| XP_009081974.1 | TRADDN-DEDD2 | 173 | LOC103810805  | vertebrata | <i>Acanthisitta chloris</i>         | PREDICTED: death effector domain-containing protein-like, partial [ <i>Acanthisitta chloris</i> ]                     | GCF_000695815.1 | TRADDN-DEDD2 |
| XP_010174856.1 | TRADDN-DEDD2 | 124 | LOC104531626  | vertebrata | <i>Antrostomus carolinensis</i>     | PREDICTED: death effector domain-containing protein, partial [ <i>Antrostomus carolinensis</i> ]                      | GCF_000700745.1 | TRADDN-DEDD2 |
| XP_013799486.1 | TRADDN-DEDD2 | 136 | LOC106485618  | vertebrata | <i>Apteryx australis mantelli</i>   | PREDICTED: DNA-binding death effector domain-containing protein 2-like, partial [ <i>Apteryx australis mantelli</i> ] | GCF_001039765.1 | TRADDN-DEDD2 |
| XP_025920279.1 | TRADDN-DEDD2 | 218 | DEDD2         | vertebrata | <i>Apteryx rowi</i>                 | DNA-binding death effector domain-containing protein 2, partial [ <i>Apteryx rowi</i> ]                               | GCF_003343035.1 | TRADDN-DEDD2 |
| POI23242.1     | TRADDN-DEDD2 | 209 | CIB84_013009  | vertebrata | <i>Bambusicola thoracicus</i>       | hypothetical protein CIB84_013009, partial [ <i>Bambusicola thoracicus</i> ]                                          | GCA_002909625.1 | TRADDN-DEDD2 |
| XP_010834143.1 | TRADDN-DEDD2 | 114 | LOC104985576  | vertebrata | <i>Bison bison bison</i>            | PREDICTED: DNA-binding death effector domain-containing protein 2, partial [ <i>Bison bison bison</i> ]               | GCF_000754665.1 | TRADDN-DEDD2 |
| XP_014817779.1 | TRADDN-DEDD2 | 320 | DEDD          | vertebrata | <i>Calidris pugnax</i>              | PREDICTED: death effector domain-containing protein isoform X1 [ <i>Calidris pugnax</i> ]                             | GCF_001431845.1 | TRADDN-DEDD2 |
| XP_014818092.1 | TRADDN-DEDD2 | 141 | LOC106900518  | vertebrata | <i>Calidris pugnax</i>              | PREDICTED: DNA-binding death effector domain-containing protein 2-like, partial [ <i>Calidris pugnax</i> ]            | GCF_001431845.1 | TRADDN-DEDD2 |
| XP_008499335.1 | TRADDN-DEDD2 | 153 | DEDD          | vertebrata | <i>Calypte anna</i>                 | PREDICTED: death effector domain-containing protein, partial [ <i>Calypte anna</i> ]                                  | -               | TRADDN-DEDD2 |
| XP_010007410.1 | TRADDN-DEDD2 | 121 | LOC104398947  | vertebrata | <i>Chaetura pelagica</i>            | PREDICTED: DNA-binding death effector domain-containing protein 2-like, partial [ <i>Chaetura pelagica</i> ]          | GCF_000747805.1 | TRADDN-DEDD2 |
| XP_010195668.1 | TRADDN-DEDD2 | 130 | LOC104554364  | vertebrata | <i>Colius striatus</i>              | PREDICTED: LOW QUALITY PROTEIN: death effector domain-containing protein-like, partial [ <i>Colius striatus</i> ]     | GCF_000690715.1 | TRADDN-DEDD2 |
| XP_011810531.1 | TRADDN-DEDD2 | 204 | LOC105521110  | vertebrata | <i>Colobus angolensis palliatus</i> | PREDICTED: death effector domain-containing protein, partial [ <i>Colobus angolensis palliatus</i> ]                  | GCF_000951035.1 | TRADDN-DEDD2 |
| KFO62040.1     | TRADDN-DEDD2 | 186 | N302_10476    | vertebrata | <i>Corvus brachyrhynchos</i>        | Death effector domain-containing protein, partial [ <i>Corvus brachyrhynchos</i> ]                                    | GCA_000691975.1 | TRADDN-DEDD2 |
| XP_017594516.1 | TRADDN-DEDD2 | 265 | LOC103619000  | vertebrata | <i>Corvus brachyrhynchos</i>        | PREDICTED: death effector domain-containing protein, partial [ <i>Corvus brachyrhynchos</i> ]                         | GCF_000691975.1 | TRADDN-DEDD2 |
| RLQ59557.1     | TRADDN-DEDD2 | 216 | CgPICR_023308 | vertebrata | <i>Cricetulus griseus</i>           | DEDD2, partial [ <i>Cricetulus griseus</i> ]                                                                          | GCA_003668045.1 | TRADDN-DEDD2 |
| XP_023802693.1 | TRADDN-DEDD2 | 142 | LOC111944134  | vertebrata | <i>Cyanistes caeruleus</i>          | death effector domain-containing protein-like [ <i>Cyanistes caeruleus</i> ]                                          | GCF_002901205.1 | TRADDN-DEDD2 |
| XP_014142490.1 | TRADDN-DEDD2 | 246 | LOC106631721  | vertebrata | <i>Falco cherrug</i>                | PREDICTED: DNA-binding death effector domain-containing protein 2-like, partial [ <i>Falco cherrug</i> ]              | -               | TRADDN-DEDD2 |
| XP_005062991.1 | TRADDN-DEDD2 | 206 | DEDD2         | vertebrata | <i>Ficedula albicollis</i>          | PREDICTED: DNA-binding death effector domain-containing protein 2, partial [ <i>Ficedula albicollis</i> ]             | GCF_000247815.1 | TRADDN-DEDD2 |

| acc            | architecture | len | gen.name          | taxend     | species                  | define                                                                                                       | gca             | clade        |
|----------------|--------------|-----|-------------------|------------|--------------------------|--------------------------------------------------------------------------------------------------------------|-----------------|--------------|
| XP_012807084.1 | TRADDN-DEDD2 | 255 | Dedd2             | vertebrata | Jaculus jaculus          | PREDICTED: DNA-binding death effector domain-containing protein 2 [Jaculus jaculus]                          | GCF_000280705.1 | TRADDN-DEDD2 |
| XP_017678799.1 | TRADDN-DEDD2 | 234 | LOC108501432      | vertebrata | Lepidothrix coronata     | PREDICTED: DNA-binding death effector domain-containing protein 2-like, partial [Lepidothrix coronata]       | GCF_001604755.1 | TRADDN-DEDD2 |
| BAE87720.1     | TRADDN-DEDD2 | 210 | -                 | vertebrata | Macaca fascicularis      | unnamed protein product [Macaca fascicularis]                                                                | -               | TRADDN-DEDD2 |
| XP_026644834.1 | TRADDN-DEDD2 | 108 | LOC113458262      | vertebrata | Microtus ochrogaster     | DNA-binding death effector domain-containing protein 2-like, partial [Microtus ochrogaster]                  | GCF_000317375.1 | TRADDN-DEDD2 |
| XP_009466332.1 | TRADDN-DEDD2 | 281 | LOC104015334      | vertebrata | Nipponia nippon          | PREDICTED: uncharacterized protein LOC104015334, partial [Nipponia nippon]                                   | GCF_000708225.1 | TRADDN-DEDD2 |
| XP_001520660.2 | TRADDN-DEDD2 | 120 | LOC100091904      | vertebrata | Ornithorhynchus anatinus | PREDICTED: DNA-binding death effector domain-containing protein 2-like, partial [Ornithorhynchus anatinus]   | -               | TRADDN-DEDD2 |
| XP_015472045.1 | TRADDN-DEDD2 | 225 | LOC107199218      | vertebrata | Parus major              | PREDICTED: death effector domain-containing protein-like [Parus major]                                       | GCF_001522545.3 | TRADDN-DEDD2 |
| XP_009498737.1 | TRADDN-DEDD2 | 136 | LOC104041205      | vertebrata | Phalacrocorax carbo      | PREDICTED: LOW QUALITY PROTEIN: death effector domain-containing protein-like, partial [Phalacrocorax carbo] | GCF_000708925.1 | TRADDN-DEDD2 |
| XP_020841292.1 | TRADDN-DEDD2 | 202 | LOC110207827      | vertebrata | Phascolarctos cinereus   | death effector domain-containing protein-like [Phascolarctos cinereus]                                       | GCF_002099425.1 | TRADDN-DEDD2 |
| XP_009894949.1 | TRADDN-DEDD2 | 129 | DEDD              | vertebrata | Picoides pubescens       | PREDICTED: death effector domain-containing protein [Picoides pubescens]                                     | GCF_000699005.1 | TRADDN-DEDD2 |
| PIO15121.1     | TRADDN-DEDD2 | 193 | AB205_0121290     | vertebrata | Rana catesbeiana         | hypothetical protein AB205_0121290 [Rana catesbeiana]                                                        | GCA_002284835.2 | TRADDN-DEDD2 |
| XP_012402660.1 | TRADDN-DEDD2 | 214 | DEDD2             | vertebrata | Sarcophilus harrisi      | DNA-binding death effector domain-containing protein 2, partial [Sarcophilus harrisi]                        | GCF_000189315.1 | TRADDN-DEDD2 |
| XP_009098808.2 | TRADDN-DEDD2 | 128 | LOC103825280      | vertebrata | Serinus canaria          | PREDICTED: death effector domain-containing protein, partial [Serinus canaria]                               | -               | TRADDN-DEDD2 |
| XP_013927609.1 | TRADDN-DEDD2 | 226 | DEDD              | vertebrata | Thamnophis sirtalis      | PREDICTED: death effector domain-containing protein [Thamnophis sirtalis]                                    | GCF_001077635.1 | TRADDN-DEDD2 |
| XP_010213717.1 | TRADDN-DEDD2 | 151 | LOC104568514      | vertebrata | Tinamus guttatus         | PREDICTED: death effector domain-containing protein-like [Tinamus guttatus]                                  | GCF_000705375.1 | TRADDN-DEDD2 |
| OCA14460.1     | TRADDN-DEDD2 | 221 | XENTR_v90026734mg | vertebrata | Xenopus tropicalis       | hypothetical protein XENTR_v90026734mg [Xenopus tropicalis]                                                  | GCA_000004195.3 | TRADDN-DEDD2 |
| XP_009079859.1 | TRADDN-NCOA6 | 876 | NCOA6             | vertebrata | Acanthisitta chloris     | PREDICTED: nuclear receptor coactivator 6, partial [Acanthisitta chloris]                                    | GCF_000695815.1 | TRADDN-NCOA6 |

| acc            | architecture | len  | gen.name     | taxend     | species                    | define                                                                            | gca             | clade        |
|----------------|--------------|------|--------------|------------|----------------------------|-----------------------------------------------------------------------------------|-----------------|--------------|
| XP_014926674.1 | TRADDN-NCOA6 | 2067 | NCOA6        | vertebrata | Acinonyx jubatus           | PREDICTED: LOW QUALITY PROTEIN: nuclear receptor coactivator 6 [Acinonyx jubatus] | -               | TRADDN-NCOA6 |
| EFB21630.1     | TRADDN-NCOA6 | 1958 | PANDA_004518 | vertebrata | Ailuropoda melanoleuca     | hypothetical protein PANDA_004518, partial [Ailuropoda melanoleuca]               | GCA_000004335.1 | TRADDN-NCOA6 |
| XP_002916443.1 | TRADDN-NCOA6 | 2057 | NCOA6        | vertebrata | Ailuropoda melanoleuca     | PREDICTED: nuclear receptor coactivator 6 isoform X1 [Ailuropoda melanoleuca]     | GCF_000004335.2 | TRADDN-NCOA6 |
| XP_011219545.1 | TRADDN-NCOA6 | 1064 | NCOA6        | vertebrata | Ailuropoda melanoleuca     | PREDICTED: nuclear receptor coactivator 6 isoform X8 [Ailuropoda melanoleuca]     | GCF_000004335.2 | TRADDN-NCOA6 |
| XP_019652147.1 | TRADDN-NCOA6 | 2056 | NCOA6        | vertebrata | Ailuropoda melanoleuca     | PREDICTED: nuclear receptor coactivator 6 isoform X2 [Ailuropoda melanoleuca]     | GCF_000004335.2 | TRADDN-NCOA6 |
| XP_019652148.1 | TRADDN-NCOA6 | 2046 | NCOA6        | vertebrata | Ailuropoda melanoleuca     | PREDICTED: nuclear receptor coactivator 6 isoform X3 [Ailuropoda melanoleuca]     | GCF_000004335.2 | TRADDN-NCOA6 |
| XP_019652149.1 | TRADDN-NCOA6 | 2045 | NCOA6        | vertebrata | Ailuropoda melanoleuca     | PREDICTED: nuclear receptor coactivator 6 isoform X4 [Ailuropoda melanoleuca]     | GCF_000004335.2 | TRADDN-NCOA6 |
| XP_019652150.1 | TRADDN-NCOA6 | 2034 | NCOA6        | vertebrata | Ailuropoda melanoleuca     | PREDICTED: nuclear receptor coactivator 6 isoform X5 [Ailuropoda melanoleuca]     | GCF_000004335.2 | TRADDN-NCOA6 |
| XP_019652151.1 | TRADDN-NCOA6 | 2033 | NCOA6        | vertebrata | Ailuropoda melanoleuca     | PREDICTED: nuclear receptor coactivator 6 isoform X6 [Ailuropoda melanoleuca]     | GCF_000004335.2 | TRADDN-NCOA6 |
| XP_019652152.1 | TRADDN-NCOA6 | 1957 | NCOA6        | vertebrata | Ailuropoda melanoleuca     | PREDICTED: nuclear receptor coactivator 6 isoform X7 [Ailuropoda melanoleuca]     | GCF_000004335.2 | TRADDN-NCOA6 |
| KYO42234.1     | TRADDN-NCOA6 | 935  | NCOA6        | vertebrata | Alligator mississippiensis | nuclear receptor coactivator 6 [Alligator mississippiensis]                       | GCA_000281125.4 | TRADDN-NCOA6 |
| XP_014465041.1 | TRADDN-NCOA6 | 2037 | NCOA6        | vertebrata | Alligator mississippiensis | PREDICTED: nuclear receptor coactivator 6 isoform X1 [Alligator mississippiensis] | GCF_000281125.3 | TRADDN-NCOA6 |
| XP_019340209.1 | TRADDN-NCOA6 | 1975 | NCOA6        | vertebrata | Alligator mississippiensis | PREDICTED: nuclear receptor coactivator 6 isoform X2 [Alligator mississippiensis] | GCF_000281125.3 | TRADDN-NCOA6 |
| XP_006024750.1 | TRADDN-NCOA6 | 2007 | NCOA6        | vertebrata | Alligator sinensis         | LOW QUALITY PROTEIN: nuclear receptor coactivator 6 [Alligator sinensis]          | GCF_000455745.1 | TRADDN-NCOA6 |
| KQK78778.1     | TRADDN-NCOA6 | 824  | AAES_110940  | vertebrata | Amazona aestiva            | nuclear receptor coactivator 6 [Amazona aestiva]                                  | GCA_001420675.1 | TRADDN-NCOA6 |
| EOB02387.1     | TRADDN-NCOA6 | 2026 | Anapl_04446  | vertebrata | Anas platyrhynchos         | Nuclear receptor coactivator 6, partial [Anas platyrhynchos]                      | GCA_000355885.1 | TRADDN-NCOA6 |
| XP_005018068.1 | TRADDN-NCOA6 | 2051 | NCOA6        | vertebrata | Anas platyrhynchos         | nuclear receptor coactivator 6 isoform X1 [Anas platyrhynchos]                    | GCF_003850225.1 | TRADDN-NCOA6 |
| XP_005018070.1 | TRADDN-NCOA6 | 1989 | NCOA6        | vertebrata | Anas platyrhynchos         | nuclear receptor coactivator 6 isoform X3 [Anas platyrhynchos]                    | -               | TRADDN-NCOA6 |
| XP_012953507.1 | TRADDN-NCOA6 | 2028 | NCOA6        | vertebrata | Anas platyrhynchos         | nuclear receptor coactivator 6 isoform X2 [Anas platyrhynchos]                    | -               | TRADDN-NCOA6 |

| acc            | architecture | len  | gen.name     | taxend     | species                      | define                                                                                | gca             | clade        |
|----------------|--------------|------|--------------|------------|------------------------------|---------------------------------------------------------------------------------------|-----------------|--------------|
| XP_012953508.1 | TRADDN-NCOA6 | 1966 | NCOA6        | vertebrata | Anas platyrhynchos           | nuclear receptor coactivator 6 isoform X4 [Anas platyrhynchos]                        | -               | TRADDN-NCOA6 |
| XP_003220610.1 | TRADDN-NCOA6 | 2035 | ncoa6        | vertebrata | Anolis carolinensis          | PREDICTED: nuclear receptor coactivator 6 isoform X2 [Anolis carolinensis]            | GCF_000090745.1 | TRADDN-NCOA6 |
| XP_008108217.1 | TRADDN-NCOA6 | 2036 | ncoa6        | vertebrata | Anolis carolinensis          | PREDICTED: nuclear receptor coactivator 6 isoform X1 [Anolis carolinensis]            | GCF_000090745.1 | TRADDN-NCOA6 |
| XP_013051372.1 | TRADDN-NCOA6 | 2052 | NCOA6        | vertebrata | Anser cygnoides domesticus   | PREDICTED: nuclear receptor coactivator 6 isoform X1 [Anser cygnoides domesticus]     | GCF_000971095.1 | TRADDN-NCOA6 |
| XP_013051373.1 | TRADDN-NCOA6 | 1990 | NCOA6        | vertebrata | Anser cygnoides domesticus   | PREDICTED: nuclear receptor coactivator 6 isoform X2 [Anser cygnoides domesticus]     | GCF_000971095.1 | TRADDN-NCOA6 |
| KFZ64822.1     | TRADDN-NCOA6 | 170  | N321_09632   | vertebrata | Antrostomus carolinensis     | Nuclear receptor coactivator 6, partial [Antrostomus carolinensis]                    | GCA_000700745.1 | TRADDN-NCOA6 |
| XP_010172959.1 | TRADDN-NCOA6 | 909  | LOC104530153 | vertebrata | Antrostomus carolinensis     | PREDICTED: nuclear receptor coactivator 6-like [Antrostomus carolinensis]             | GCF_000700745.1 | TRADDN-NCOA6 |
| XP_012310564.1 | TRADDN-NCOA6 | 2098 | NCOA6        | vertebrata | Aotus nancymaae              | nuclear receptor coactivator 6 isoform X1 [Aotus nancymaae]                           | GCF_000952055.2 | TRADDN-NCOA6 |
| XP_012310567.1 | TRADDN-NCOA6 | 2086 | NCOA6        | vertebrata | Aotus nancymaae              | nuclear receptor coactivator 6 isoform X3 [Aotus nancymaae]                           | GCF_000952055.2 | TRADDN-NCOA6 |
| XP_021521524.1 | TRADDN-NCOA6 | 2097 | NCOA6        | vertebrata | Aotus nancymaae              | nuclear receptor coactivator 6 isoform X2 [Aotus nancymaae]                           | GCF_000952055.2 | TRADDN-NCOA6 |
| KFP76911.1     | TRADDN-NCOA6 | 131  | N311_08707   | vertebrata | Apaloderma vittatum          | Nuclear receptor coactivator 6, partial [Apaloderma vittatum]                         | GCA_000703405.1 | TRADDN-NCOA6 |
| XP_009877278.1 | TRADDN-NCOA6 | 778  | LOC104269611 | vertebrata | Apaloderma vittatum          | PREDICTED: nuclear receptor coactivator 6-like, partial [Apaloderma vittatum]         | GCF_000703405.1 | TRADDN-NCOA6 |
| XP_019328674.1 | TRADDN-NCOA6 | 2049 | NCOA6        | vertebrata | Aptenodytes forsteri         | PREDICTED: LOW QUALITY PROTEIN: nuclear receptor coactivator 6 [Aptenodytes forsteri] | GCF_000699145.1 | TRADDN-NCOA6 |
| XP_013817000.1 | TRADDN-NCOA6 | 2044 | NCOA6        | vertebrata | Apteryx australis mantelli   | PREDICTED: nuclear receptor coactivator 6 [Apteryx australis mantelli]                | GCF_001039765.1 | TRADDN-NCOA6 |
| XP_011596090.1 | TRADDN-NCOA6 | 2054 | NCOA6        | vertebrata | Aquila chrysaetos canadensis | PREDICTED: nuclear receptor coactivator 6 isoform X1 [Aquila chrysaetos canadensis]   | GCF_000766835.1 | TRADDN-NCOA6 |
| XP_011596097.1 | TRADDN-NCOA6 | 2046 | NCOA6        | vertebrata | Aquila chrysaetos canadensis | PREDICTED: nuclear receptor coactivator 6 isoform X2 [Aquila chrysaetos canadensis]   | GCF_000766835.1 | TRADDN-NCOA6 |
| XP_011596098.1 | TRADDN-NCOA6 | 2045 | NCOA6        | vertebrata | Aquila chrysaetos canadensis | PREDICTED: nuclear receptor coactivator 6 isoform X3 [Aquila chrysaetos canadensis]   | GCF_000766835.1 | TRADDN-NCOA6 |
| XP_011596099.1 | TRADDN-NCOA6 | 2043 | NCOA6        | vertebrata | Aquila chrysaetos canadensis | PREDICTED: nuclear receptor coactivator 6 isoform X4 [Aquila chrysaetos canadensis]   | GCF_000766835.1 | TRADDN-NCOA6 |
| XP_011596100.1 | TRADDN-NCOA6 | 2005 | NCOA6        | vertebrata | Aquila chrysaetos canadensis | PREDICTED: nuclear receptor coactivator 6 isoform X5 [Aquila chrysaetos canadensis]   | GCF_000766835.1 | TRADDN-NCOA6 |

| acc            | architecture | len  | gen.name     | taxend     | species                             | define                                                                                     | gca             | clade        |
|----------------|--------------|------|--------------|------------|-------------------------------------|--------------------------------------------------------------------------------------------|-----------------|--------------|
| XP_011596101.1 | TRADDN-NCOA6 | 1986 | NCOA6        | vertebrata | Aquila chrysaetos canadensis        | PREDICTED: nuclear receptor coactivator 6 isoform X6 [Aquila chrysaetos canadensis]        | GCF_000766835.1 | TRADDN-NCOA6 |
| XP_011596102.1 | TRADDN-NCOA6 | 1984 | NCOA6        | vertebrata | Aquila chrysaetos canadensis        | PREDICTED: nuclear receptor coactivator 6 isoform X7 [Aquila chrysaetos canadensis]        | GCF_000766835.1 | TRADDN-NCOA6 |
| XP_011596104.1 | TRADDN-NCOA6 | 1781 | NCOA6        | vertebrata | Aquila chrysaetos canadensis        | PREDICTED: nuclear receptor coactivator 6 isoform X9 [Aquila chrysaetos canadensis]        | GCF_000766835.1 | TRADDN-NCOA6 |
| XP_011596105.1 | TRADDN-NCOA6 | 1732 | NCOA6        | vertebrata | Aquila chrysaetos canadensis        | PREDICTED: nuclear receptor coactivator 6 isoform X10 [Aquila chrysaetos canadensis]       | GCF_000766835.1 | TRADDN-NCOA6 |
| XP_011596106.1 | TRADDN-NCOA6 | 445  | NCOA6        | vertebrata | Aquila chrysaetos canadensis        | PREDICTED: nuclear receptor coactivator 6 isoform X11 [Aquila chrysaetos canadensis]       | GCF_000766835.1 | TRADDN-NCOA6 |
| XP_011596107.1 | TRADDN-NCOA6 | 222  | NCOA6        | vertebrata | Aquila chrysaetos canadensis        | PREDICTED: nuclear receptor coactivator 6 isoform X12 [Aquila chrysaetos canadensis]       | GCF_000766835.1 | TRADDN-NCOA6 |
| XP_007193310.1 | TRADDN-NCOA6 | 2043 | NCOA6        | vertebrata | Balaenoptera acutorostrata scammoni | PREDICTED: nuclear receptor coactivator 6 isoform X1 [Balaenoptera acutorostrata scammoni] | GCF_000493695.1 | TRADDN-NCOA6 |
| XP_007193311.1 | TRADDN-NCOA6 | 2032 | NCOA6        | vertebrata | Balaenoptera acutorostrata scammoni | PREDICTED: nuclear receptor coactivator 6 isoform X2 [Balaenoptera acutorostrata scammoni] | GCF_000493695.1 | TRADDN-NCOA6 |
| XP_007193312.1 | TRADDN-NCOA6 | 2031 | NCOA6        | vertebrata | Balaenoptera acutorostrata scammoni | PREDICTED: nuclear receptor coactivator 6 isoform X3 [Balaenoptera acutorostrata scammoni] | GCF_000493695.1 | TRADDN-NCOA6 |
| XP_007193313.1 | TRADDN-NCOA6 | 1058 | NCOA6        | vertebrata | Balaenoptera acutorostrata scammoni | PREDICTED: nuclear receptor coactivator 6 isoform X4 [Balaenoptera acutorostrata scammoni] | GCF_000493695.1 | TRADDN-NCOA6 |
| KFO09167.1     | TRADDN-NCOA6 | 2036 | N312_03074   | vertebrata | Balearica regulorum gibbericeps     | Nuclear receptor coactivator 6 [Balearica regulorum gibbericeps]                           | GCA_000709895.1 | TRADDN-NCOA6 |
| XP_010297219.1 | TRADDN-NCOA6 | 2075 | NCOA6        | vertebrata | Balearica regulorum gibbericeps     | PREDICTED: nuclear receptor coactivator 6 [Balearica regulorum gibbericeps]                | GCF_000709895.1 | TRADDN-NCOA6 |
| POI28073.1     | TRADDN-NCOA6 | 101  | CIB84_008176 | vertebrata | Bambusicola thoracicus              | hypothetical protein CIB84_008176, partial [Bambusicola thoracicus]                        | GCA_002909625.1 | TRADDN-NCOA6 |
| XP_010853183.1 | TRADDN-NCOA6 | 2048 | NCOA6        | vertebrata | Bison bison bison                   | PREDICTED: nuclear receptor coactivator 6 isoform X1 [Bison bison bison]                   | GCF_000754665.1 | TRADDN-NCOA6 |
| XP_010853186.1 | TRADDN-NCOA6 | 2047 | NCOA6        | vertebrata | Bison bison bison                   | PREDICTED: nuclear receptor coactivator 6 isoform X2 [Bison bison bison]                   | GCF_000754665.1 | TRADDN-NCOA6 |
| XP_019827851.1 | TRADDN-NCOA6 | 2037 | NCOA6        | vertebrata | Bos indicus                         | PREDICTED: nuclear receptor coactivator 6 isoform X2 [Bos indicus]                         | GCF_000247795.1 | TRADDN-NCOA6 |

| acc            | architecture | len  | gen.name     | taxend     | species                       | define                                                                             | gca             | clade        |
|----------------|--------------|------|--------------|------------|-------------------------------|------------------------------------------------------------------------------------|-----------------|--------------|
| XP_019827852.1 | TRADDN-NCOA6 | 2036 | NCOA6        | vertebrata | Bos indicus                   | PREDICTED: nuclear receptor coactivator 6 isoform X3 [Bos indicus]                 | GCF_000247795.1 | TRADDN-NCOA6 |
| XP_019827853.1 | TRADDN-NCOA6 | 1719 | NCOA6        | vertebrata | Bos indicus                   | PREDICTED: nuclear receptor coactivator 6 isoform X4 [Bos indicus]                 | GCF_000247795.1 | TRADDN-NCOA6 |
| XP_019827854.1 | TRADDN-NCOA6 | 1670 | NCOA6        | vertebrata | Bos indicus                   | PREDICTED: nuclear receptor coactivator 6 isoform X5 [Bos indicus]                 | GCF_000247795.1 | TRADDN-NCOA6 |
| XP_019827855.1 | TRADDN-NCOA6 | 1061 | NCOA6        | vertebrata | Bos indicus                   | PREDICTED: nuclear receptor coactivator 6 isoform X6 [Bos indicus]                 | GCF_000247795.1 | TRADDN-NCOA6 |
| ELR53021.1     | TRADDN-NCOA6 | 2049 | M91_20163    | vertebrata | Bos mutus                     | Nuclear receptor coactivator 6, partial [Bos mutus]                                | GCA_000298355.1 | TRADDN-NCOA6 |
| XP_005900492.1 | TRADDN-NCOA6 | 2048 | NCOA6        | vertebrata | Bos mutus                     | PREDICTED: nuclear receptor coactivator 6 isoform X1 [Bos mutus]                   | GCF_000298355.1 | TRADDN-NCOA6 |
| XP_005900493.1 | TRADDN-NCOA6 | 1061 | NCOA6        | vertebrata | Bos mutus                     | PREDICTED: nuclear receptor coactivator 6 isoform X2 [Bos mutus]                   | GCF_000298355.1 | TRADDN-NCOA6 |
| XP_002692491.1 | TRADDN-NCOA6 | 2048 | NCOA6        | vertebrata | Bos taurus                    | nuclear receptor coactivator 6 isoform X1 [Bos taurus]                             | GCF_002263795.1 | TRADDN-NCOA6 |
| XP_024856968.1 | TRADDN-NCOA6 | 2047 | NCOA6        | vertebrata | Bos taurus                    | nuclear receptor coactivator 6 isoform X2 [Bos taurus]                             | GCF_002263795.1 | TRADDN-NCOA6 |
| XP_025119384.1 | TRADDN-NCOA6 | 2049 | NCOA6        | vertebrata | Bubalus bubalis               | nuclear receptor coactivator 6 isoform X1 [Bubalus bubalis]                        | GCF_003121395.1 | TRADDN-NCOA6 |
| XP_025119388.1 | TRADDN-NCOA6 | 2048 | NCOA6        | vertebrata | Bubalus bubalis               | nuclear receptor coactivator 6 isoform X2 [Bubalus bubalis]                        | GCF_003121395.1 | TRADDN-NCOA6 |
| XP_025119390.1 | TRADDN-NCOA6 | 2038 | NCOA6        | vertebrata | Bubalus bubalis               | nuclear receptor coactivator 6 isoform X3 [Bubalus bubalis]                        | GCF_003121395.1 | TRADDN-NCOA6 |
| XP_025119391.1 | TRADDN-NCOA6 | 2037 | NCOA6        | vertebrata | Bubalus bubalis               | nuclear receptor coactivator 6 isoform X4 [Bubalus bubalis]                        | GCF_003121395.1 | TRADDN-NCOA6 |
| XP_025119392.1 | TRADDN-NCOA6 | 2006 | NCOA6        | vertebrata | Bubalus bubalis               | nuclear receptor coactivator 6 isoform X5 [Bubalus bubalis]                        | GCF_003121395.1 | TRADDN-NCOA6 |
| XP_025119396.1 | TRADDN-NCOA6 | 1720 | NCOA6        | vertebrata | Bubalus bubalis               | nuclear receptor coactivator 6 isoform X9 [Bubalus bubalis]                        | GCF_003121395.1 | TRADDN-NCOA6 |
| XP_025119397.1 | TRADDN-NCOA6 | 1671 | NCOA6        | vertebrata | Bubalus bubalis               | nuclear receptor coactivator 6 isoform X10 [Bubalus bubalis]                       | GCF_003121395.1 | TRADDN-NCOA6 |
| XP_025119398.1 | TRADDN-NCOA6 | 1061 | NCOA6        | vertebrata | Bubalus bubalis               | nuclear receptor coactivator 6 isoform X11 [Bubalus bubalis]                       | GCF_003121395.1 | TRADDN-NCOA6 |
| KFO87084.1     | TRADDN-NCOA6 | 1872 | N320_06575   | vertebrata | Buceros rhinoceros silvestris | Nuclear receptor coactivator 6, partial [Buceros rhinoceros silvestris]            | GCA_000710305.1 | TRADDN-NCOA6 |
| XP_010130159.1 | TRADDN-NCOA6 | 1814 | NCOA6        | vertebrata | Buceros rhinoceros silvestris | PREDICTED: nuclear receptor coactivator 6, partial [Buceros rhinoceros silvestris] | GCF_000710305.1 | TRADDN-NCOA6 |
| XP_014793052.1 | TRADDN-NCOA6 | 2041 | NCOA6        | vertebrata | Calidris pugnax               | PREDICTED: nuclear receptor coactivator 6 isoform X1 [Calidris pugnax]             | GCF_001431845.1 | TRADDN-NCOA6 |
| XP_014793053.1 | TRADDN-NCOA6 | 1979 | NCOA6        | vertebrata | Calidris pugnax               | PREDICTED: nuclear receptor coactivator 6 isoform X2 [Calidris pugnax]             | GCF_001431845.1 | TRADDN-NCOA6 |
| OXB57330.1     | TRADDN-NCOA6 | 142  | ASZ78_011750 | vertebrata | Callipepla squamata           | hypothetical protein ASZ78_011750 [Callipepla squamata]                            | GCA_002218305.1 | TRADDN-NCOA6 |

| acc            | architecture | len  | gen.name      | taxend     | species                | define                                                                     | gca             | clade        |
|----------------|--------------|------|---------------|------------|------------------------|----------------------------------------------------------------------------|-----------------|--------------|
| XP_008993731.1 | TRADDN-NCOA6 | 2065 | NCOA6         | vertebrata | Callithrix jacchus     | PREDICTED: nuclear receptor coactivator 6 isoform X1 [Callithrix jacchus]  | GCF_000004665.1 | TRADDN-NCOA6 |
| XP_008993734.1 | TRADDN-NCOA6 | 2064 | NCOA6         | vertebrata | Callithrix jacchus     | PREDICTED: nuclear receptor coactivator 6 isoform X2 [Callithrix jacchus]  | GCF_000004665.1 | TRADDN-NCOA6 |
| XP_008993735.1 | TRADDN-NCOA6 | 2053 | NCOA6         | vertebrata | Callithrix jacchus     | PREDICTED: nuclear receptor coactivator 6 isoform X3 [Callithrix jacchus]  | GCF_000004665.1 | TRADDN-NCOA6 |
| XP_017827305.1 | TRADDN-NCOA6 | 2050 | NCOA6         | vertebrata | Callithrix jacchus     | PREDICTED: nuclear receptor coactivator 6 isoform X4 [Callithrix jacchus]  | GCF_000004665.1 | TRADDN-NCOA6 |
| XP_017827306.1 | TRADDN-NCOA6 | 1977 | NCOA6         | vertebrata | Callithrix jacchus     | PREDICTED: nuclear receptor coactivator 6 isoform X5 [Callithrix jacchus]  | GCF_000004665.1 | TRADDN-NCOA6 |
| XP_017827307.1 | TRADDN-NCOA6 | 1070 | NCOA6         | vertebrata | Callithrix jacchus     | PREDICTED: nuclear receptor coactivator 6 isoform X6 [Callithrix jacchus]  | GCF_000004665.1 | TRADDN-NCOA6 |
| XP_007903405.1 | TRADDN-NCOA6 | 2032 | ncoa6         | vertebrata | Callorhinchus milii    | PREDICTED: nuclear receptor coactivator 6 [Callorhinchus milii]            | GCF_000165045.1 | TRADDN-NCOA6 |
| XP_008489371.1 | TRADDN-NCOA6 | 1049 | NCOA6         | vertebrata | Calypte anna           | PREDICTED: nuclear receptor coactivator 6 [Calypte anna]                   | -               | TRADDN-NCOA6 |
| XP_010959132.1 | TRADDN-NCOA6 | 2049 | NCOA6         | vertebrata | Camelus bactrianus     | PREDICTED: nuclear receptor coactivator 6 [Camelus bactrianus]             | GCF_000767855.1 | TRADDN-NCOA6 |
| XP_010973454.1 | TRADDN-NCOA6 | 2046 | NCOA6         | vertebrata | Camelus dromedarius    | PREDICTED: nuclear receptor coactivator 6 isoform X1 [Camelus dromedarius] | -               | TRADDN-NCOA6 |
| XP_010973455.1 | TRADDN-NCOA6 | 2046 | NCOA6         | vertebrata | Camelus dromedarius    | PREDICTED: nuclear receptor coactivator 6 isoform X2 [Camelus dromedarius] | -               | TRADDN-NCOA6 |
| XP_010973456.1 | TRADDN-NCOA6 | 2045 | NCOA6         | vertebrata | Camelus dromedarius    | PREDICTED: nuclear receptor coactivator 6 isoform X3 [Camelus dromedarius] | -               | TRADDN-NCOA6 |
| EPY78264.1     | TRADDN-NCOA6 | 593  | CB1_001108014 | vertebrata | Camelus ferus          | hypothetical protein CB1_001108014 [Camelus ferus]                         | GCA_000311805.2 | TRADDN-NCOA6 |
| XP_006188620.1 | TRADDN-NCOA6 | 2049 | NCOA6         | vertebrata | Camelus ferus          | PREDICTED: nuclear receptor coactivator 6 isoform X1 [Camelus ferus]       | GCF_000311805.1 | TRADDN-NCOA6 |
| XP_014417993.1 | TRADDN-NCOA6 | 2048 | NCOA6         | vertebrata | Camelus ferus          | PREDICTED: nuclear receptor coactivator 6 isoform X2 [Camelus ferus]       | GCF_000311805.1 | TRADDN-NCOA6 |
| XP_005635015.1 | TRADDN-NCOA6 | 2060 | NCOA6         | vertebrata | Canis lupus familiaris | nuclear receptor coactivator 6 isoform X1 [Canis lupus familiaris]         | GCF_000002285.3 | TRADDN-NCOA6 |
| XP_013962381.1 | TRADDN-NCOA6 | 2059 | NCOA6         | vertebrata | Canis lupus familiaris | nuclear receptor coactivator 6 isoform X2 [Canis lupus familiaris]         | GCF_000002285.3 | TRADDN-NCOA6 |
| XP_013962382.1 | TRADDN-NCOA6 | 2049 | NCOA6         | vertebrata | Canis lupus familiaris | nuclear receptor coactivator 6 isoform X4 [Canis lupus familiaris]         | GCF_000002285.3 | TRADDN-NCOA6 |
| XP_013962383.1 | TRADDN-NCOA6 | 2048 | NCOA6         | vertebrata | Canis lupus familiaris | nuclear receptor coactivator 6 isoform X5 [Canis lupus familiaris]         | GCF_000002285.3 | TRADDN-NCOA6 |
| XP_013962384.1 | TRADDN-NCOA6 | 1063 | NCOA6         | vertebrata | Canis lupus familiaris | nuclear receptor coactivator 6 isoform X8 [Canis lupus familiaris]         | GCF_000002285.3 | TRADDN-NCOA6 |

| acc            | architecture | len  | gen.name   | taxend     | species                  | define                                                                          | gca             | clade        |
|----------------|--------------|------|------------|------------|--------------------------|---------------------------------------------------------------------------------|-----------------|--------------|
| XP_022265089.1 | TRADDN-NCOA6 | 2053 | NCOA6      | vertebrata | Canis lupus familiaris   | nuclear receptor coactivator 6 isoform X3 [Canis lupus familiaris]              | GCF_000002285.3 | TRADDN-NCOA6 |
| XP_022265090.1 | TRADDN-NCOA6 | 2031 | NCOA6      | vertebrata | Canis lupus familiaris   | nuclear receptor coactivator 6 isoform X6 [Canis lupus familiaris]              | GCF_000002285.3 | TRADDN-NCOA6 |
| XP_022265091.1 | TRADDN-NCOA6 | 1953 | NCOA6      | vertebrata | Canis lupus familiaris   | nuclear receptor coactivator 6 isoform X7 [Canis lupus familiaris]              | GCF_000002285.3 | TRADDN-NCOA6 |
| XP_017913233.1 | TRADDN-NCOA6 | 2043 | NCOA6      | vertebrata | Capra hircus             | PREDICTED: nuclear receptor coactivator 6 isoform X1 [Capra hircus]             | GCF_001704415.1 | TRADDN-NCOA6 |
| XP_017913236.1 | TRADDN-NCOA6 | 2032 | NCOA6      | vertebrata | Capra hircus             | PREDICTED: nuclear receptor coactivator 6 isoform X2 [Capra hircus]             | GCF_001704415.1 | TRADDN-NCOA6 |
| XP_017913237.1 | TRADDN-NCOA6 | 2031 | NCOA6      | vertebrata | Capra hircus             | PREDICTED: nuclear receptor coactivator 6 isoform X3 [Capra hircus]             | GCF_001704415.1 | TRADDN-NCOA6 |
| KFP58253.1     | TRADDN-NCOA6 | 131  | N322_11703 | vertebrata | Cariama cristata         | Nuclear receptor coactivator 6, partial [Cariama cristata]                      | GCA_000690535.1 | TRADDN-NCOA6 |
| KFP60844.1     | TRADDN-NCOA6 | 1914 | N322_05085 | vertebrata | Cariama cristata         | Nuclear receptor coactivator 6, partial [Cariama cristata]                      | GCA_000690535.1 | TRADDN-NCOA6 |
| XP_009696492.1 | TRADDN-NCOA6 | 1914 | NCOA6      | vertebrata | Cariama cristata         | PREDICTED: nuclear receptor coactivator 6, partial [Cariama cristata]           | GCF_000690535.1 | TRADDN-NCOA6 |
| XP_021574354.1 | TRADDN-NCOA6 | 1962 | NCOA6      | vertebrata | Carlito syrichta         | nuclear receptor coactivator 6 [Carlito syrichta]                               | GCF_000164805.1 | TRADDN-NCOA6 |
| XP_020018573.1 | TRADDN-NCOA6 | 2095 | Ncoa6      | vertebrata | Castor canadensis        | nuclear receptor coactivator 6 isoform X1 [Castor canadensis]                   | GCF_001984765.1 | TRADDN-NCOA6 |
| XP_020018574.1 | TRADDN-NCOA6 | 2084 | Ncoa6      | vertebrata | Castor canadensis        | nuclear receptor coactivator 6 isoform X2 [Castor canadensis]                   | GCF_001984765.1 | TRADDN-NCOA6 |
| XP_020018575.1 | TRADDN-NCOA6 | 2083 | Ncoa6      | vertebrata | Castor canadensis        | nuclear receptor coactivator 6 isoform X3 [Castor canadensis]                   | GCF_001984765.1 | TRADDN-NCOA6 |
| APL97873.1     | TRADDN-NCOA6 | 2060 | NCOA6      | vertebrata | Castor fiber             | nuclear receptor coactivator 6 [Castor fiber]                                   | -               | TRADDN-NCOA6 |
| KFP49468.1     | TRADDN-NCOA6 | 170  | N323_00992 | vertebrata | Cathartes aura           | Nuclear receptor coactivator 6, partial [Cathartes aura]                        | GCA_000699945.1 | TRADDN-NCOA6 |
| XP_003467778.1 | TRADDN-NCOA6 | 2063 | Ncoa6      | vertebrata | Cavia porcellus          | nuclear receptor coactivator 6 isoform X1 [Cavia porcellus]                     | GCF_000151735.1 | TRADDN-NCOA6 |
| XP_003467780.2 | TRADDN-NCOA6 | 1073 | Ncoa6      | vertebrata | Cavia porcellus          | nuclear receptor coactivator 6 isoform X5 [Cavia porcellus]                     | GCF_000151735.1 | TRADDN-NCOA6 |
| XP_013005709.1 | TRADDN-NCOA6 | 2052 | Ncoa6      | vertebrata | Cavia porcellus          | nuclear receptor coactivator 6 isoform X2 [Cavia porcellus]                     | GCF_000151735.1 | TRADDN-NCOA6 |
| XP_013005710.1 | TRADDN-NCOA6 | 2051 | Ncoa6      | vertebrata | Cavia porcellus          | nuclear receptor coactivator 6 isoform X3 [Cavia porcellus]                     | GCF_000151735.1 | TRADDN-NCOA6 |
| XP_013005711.1 | TRADDN-NCOA6 | 1972 | Ncoa6      | vertebrata | Cavia porcellus          | nuclear receptor coactivator 6 isoform X4 [Cavia porcellus]                     | GCF_000151735.1 | TRADDN-NCOA6 |
| XP_017369161.1 | TRADDN-NCOA6 | 2076 | NCOA6      | vertebrata | Cebus capucinus imitator | PREDICTED: nuclear receptor coactivator 6 isoform X1 [Cebus capucinus imitator] | GCF_001604975.1 | TRADDN-NCOA6 |
| XP_017369188.1 | TRADDN-NCOA6 | 2075 | NCOA6      | vertebrata | Cebus capucinus imitator | PREDICTED: nuclear receptor coactivator 6 isoform X2 [Cebus capucinus imitator] | GCF_001604975.1 | TRADDN-NCOA6 |



| acc            | architecture | len  | gen.name     | taxend     | species                   | define                                                                           | gca             | clade        |
|----------------|--------------|------|--------------|------------|---------------------------|----------------------------------------------------------------------------------|-----------------|--------------|
| XP_017369198.1 | TRADDN-NCOA6 | 2064 | NCOA6        | vertebrata | Cebus capucinus imitator  | PREDICTED: nuclear receptor coactivator 6 isoform X3 [Cebus capucinus imitator]  | GCF_001604975.1 | TRADDN-NCOA6 |
| XP_017369215.1 | TRADDN-NCOA6 | 1928 | NCOA6        | vertebrata | Cebus capucinus imitator  | PREDICTED: nuclear receptor coactivator 6 isoform X4 [Cebus capucinus imitator]  | GCF_001604975.1 | TRADDN-NCOA6 |
| XP_017369223.1 | TRADDN-NCOA6 | 1075 | NCOA6        | vertebrata | Cebus capucinus imitator  | PREDICTED: nuclear receptor coactivator 6 isoform X5 [Cebus capucinus imitator]  | GCF_001604975.1 | TRADDN-NCOA6 |
| XP_014643006.1 | TRADDN-NCOA6 | 2053 | LOC101398778 | vertebrata | Ceratotherium simum simum | PREDICTED: nuclear receptor coactivator 6 isoform X1 [Ceratotherium simum simum] | GCF_000283155.1 | TRADDN-NCOA6 |
| XP_014643008.1 | TRADDN-NCOA6 | 2052 | LOC101398778 | vertebrata | Ceratotherium simum simum | PREDICTED: nuclear receptor coactivator 6 isoform X2 [Ceratotherium simum simum] | GCF_000283155.1 | TRADDN-NCOA6 |
| XP_014643009.1 | TRADDN-NCOA6 | 2042 | LOC101398778 | vertebrata | Ceratotherium simum simum | PREDICTED: nuclear receptor coactivator 6 isoform X3 [Ceratotherium simum simum] | GCF_000283155.1 | TRADDN-NCOA6 |
| XP_014643010.1 | TRADDN-NCOA6 | 2041 | LOC101398778 | vertebrata | Ceratotherium simum simum | PREDICTED: nuclear receptor coactivator 6 isoform X4 [Ceratotherium simum simum] | GCF_000283155.1 | TRADDN-NCOA6 |
| XP_014643011.1 | TRADDN-NCOA6 | 1953 | LOC101398778 | vertebrata | Ceratotherium simum simum | PREDICTED: nuclear receptor coactivator 6 isoform X5 [Ceratotherium simum simum] | GCF_000283155.1 | TRADDN-NCOA6 |
| XP_014643012.1 | TRADDN-NCOA6 | 1061 | LOC101398778 | vertebrata | Ceratotherium simum simum | PREDICTED: nuclear receptor coactivator 6 isoform X6 [Ceratotherium simum simum] | GCF_000283155.1 | TRADDN-NCOA6 |
| XP_011907991.1 | TRADDN-NCOA6 | 2068 | NCOA6        | vertebrata | Cercocebus atys           | PREDICTED: nuclear receptor coactivator 6 isoform X1 [Cercocebus atys]           | GCF_000955945.1 | TRADDN-NCOA6 |
| XP_011907994.1 | TRADDN-NCOA6 | 2067 | NCOA6        | vertebrata | Cercocebus atys           | PREDICTED: nuclear receptor coactivator 6 isoform X2 [Cercocebus atys]           | GCF_000955945.1 | TRADDN-NCOA6 |
| XP_011907995.1 | TRADDN-NCOA6 | 2057 | NCOA6        | vertebrata | Cercocebus atys           | PREDICTED: nuclear receptor coactivator 6 isoform X3 [Cercocebus atys]           | GCF_000955945.1 | TRADDN-NCOA6 |
| XP_011907996.1 | TRADDN-NCOA6 | 2056 | NCOA6        | vertebrata | Cercocebus atys           | PREDICTED: nuclear receptor coactivator 6 isoform X4 [Cercocebus atys]           | GCF_000955945.1 | TRADDN-NCOA6 |
| XP_011907997.1 | TRADDN-NCOA6 | 2053 | NCOA6        | vertebrata | Cercocebus atys           | PREDICTED: nuclear receptor coactivator 6 isoform X5 [Cercocebus atys]           | GCF_000955945.1 | TRADDN-NCOA6 |
| XP_011907998.1 | TRADDN-NCOA6 | 2039 | NCOA6        | vertebrata | Cercocebus atys           | PREDICTED: nuclear receptor coactivator 6 isoform X6 [Cercocebus atys]           | GCF_000955945.1 | TRADDN-NCOA6 |
| XP_011907999.1 | TRADDN-NCOA6 | 2025 | NCOA6        | vertebrata | Cercocebus atys           | PREDICTED: nuclear receptor coactivator 6 isoform X7 [Cercocebus atys]           | GCF_000955945.1 | TRADDN-NCOA6 |
| XP_011908002.1 | TRADDN-NCOA6 | 1072 | NCOA6        | vertebrata | Cercocebus atys           | PREDICTED: nuclear receptor coactivator 6 isoform X9 [Cercocebus atys]           | GCF_000955945.1 | TRADDN-NCOA6 |

| acc            | architecture | len  | gen.name          | taxend     | species                    | define                                                                              | gca             | clade        |
|----------------|--------------|------|-------------------|------------|----------------------------|-------------------------------------------------------------------------------------|-----------------|--------------|
| OWK02943.1     | TRADDN-NCOA6 | 1896 | Celaphus_00007913 | vertebrata | Cervus elaphus hippelaphus | hypothetical protein<br>Celaphus_00007913 [Cervus elaphus<br>hippelaphus]           | GCA_002197005.1 | TRADDN-NCOA6 |
| XP_009998148.1 | TRADDN-NCOA6 | 1046 | NCOA6             | vertebrata | Chaetura pelagica          | PREDICTED: nuclear receptor<br>coactivator 6 [Chaetura pelagica]                    | GCF_000747805.1 | TRADDN-NCOA6 |
| KGL94362.1     | TRADDN-NCOA6 | 2047 | N301_05407        | vertebrata | Charadrius vociferus       | Nuclear receptor coactivator 6<br>[Charadrius vociferus]                            | GCA_000708025.2 | TRADDN-NCOA6 |
| XP_009884631.1 | TRADDN-NCOA6 | 1049 | NCOA6             | vertebrata | Charadrius vociferus       | PREDICTED: nuclear receptor<br>coactivator 6 [Charadrius vociferus]                 | GCF_000708025.1 | TRADDN-NCOA6 |
| EMP38212.1     | TRADDN-NCOA6 | 2031 | UY3_04555         | vertebrata | Chelonia mydas             | Nuclear receptor coactivator 6,<br>partial [Chelonia mydas]                         | GCA_000344595.1 | TRADDN-NCOA6 |
| XP_007057222.1 | TRADDN-NCOA6 | 2026 | NCOA6             | vertebrata | Chelonia mydas             | PREDICTED: nuclear receptor<br>coactivator 6 isoform X1 [Chelonia<br>mydas]         | -               | TRADDN-NCOA6 |
| XP_007057223.1 | TRADDN-NCOA6 | 1044 | NCOA6             | vertebrata | Chelonia mydas             | PREDICTED: nuclear receptor<br>coactivator 6 isoform X2 [Chelonia<br>mydas]         | -               | TRADDN-NCOA6 |
| XP_005384876.1 | TRADDN-NCOA6 | 2063 | Ncoa6             | vertebrata | Chinchilla lanigera        | PREDICTED: nuclear receptor<br>coactivator 6 isoform X2 [Chinchilla<br>lanigera]    | GCF_000276665.1 | TRADDN-NCOA6 |
| XP_005384877.1 | TRADDN-NCOA6 | 2062 | Ncoa6             | vertebrata | Chinchilla lanigera        | PREDICTED: nuclear receptor<br>coactivator 6 isoform X3 [Chinchilla<br>lanigera]    | GCF_000276665.1 | TRADDN-NCOA6 |
| XP_005384880.1 | TRADDN-NCOA6 | 1075 | Ncoa6             | vertebrata | Chinchilla lanigera        | PREDICTED: nuclear receptor<br>coactivator 6 isoform X6 [Chinchilla<br>lanigera]    | GCF_000276665.1 | TRADDN-NCOA6 |
| XP_013369541.1 | TRADDN-NCOA6 | 2074 | Ncoa6             | vertebrata | Chinchilla lanigera        | PREDICTED: nuclear receptor<br>coactivator 6 isoform X1 [Chinchilla<br>lanigera]    | GCF_000276665.1 | TRADDN-NCOA6 |
| XP_013369542.1 | TRADDN-NCOA6 | 1983 | Ncoa6             | vertebrata | Chinchilla lanigera        | PREDICTED: nuclear receptor<br>coactivator 6 isoform X4 [Chinchilla<br>lanigera]    | GCF_000276665.1 | TRADDN-NCOA6 |
| KFP43437.1     | TRADDN-NCOA6 | 131  | N324_07749        | vertebrata | Chlamydotis macqueenii     | Nuclear receptor coactivator 6,<br>partial [Chlamydotis macqueenii]                 | GCA_000695195.1 | TRADDN-NCOA6 |
| XP_008019663.1 | TRADDN-NCOA6 | 2067 | NCOA6             | vertebrata | Chlorocebus sabaesus       | PREDICTED: nuclear receptor<br>coactivator 6 isoform X1<br>[Chlorocebus sabaesus]   | GCF_000409795.2 | TRADDN-NCOA6 |
| XP_008019687.1 | TRADDN-NCOA6 | 2056 | NCOA6             | vertebrata | Chlorocebus sabaesus       | PREDICTED: nuclear receptor<br>coactivator 6 isoform X2<br>[Chlorocebus sabaesus]   | GCF_000409795.2 | TRADDN-NCOA6 |
| XP_008019692.1 | TRADDN-NCOA6 | 2055 | NCOA6             | vertebrata | Chlorocebus sabaesus       | PREDICTED: nuclear receptor<br>coactivator 6 isoform X3<br>[Chlorocebus sabaesus]   | GCF_000409795.2 | TRADDN-NCOA6 |
| XP_008019700.1 | TRADDN-NCOA6 | 2015 | NCOA6             | vertebrata | Chlorocebus sabaesus       | PREDICTED: nuclear receptor<br>coactivator 6 isoform X4<br>[Chlorocebus sabaesus]   | GCF_000409795.2 | TRADDN-NCOA6 |
| XP_005295438.1 | TRADDN-NCOA6 | 2020 | NCOA6             | vertebrata | Chrysemys picta bellii     | nuclear receptor coactivator 6<br>[Chrysemys picta bellii]                          | GCF_000241765.3 | TRADDN-NCOA6 |
| XP_006876936.1 | TRADDN-NCOA6 | 2081 | NCOA6             | vertebrata | Chrysochloris asiatica     | PREDICTED: nuclear receptor<br>coactivator 6 isoform X1<br>[Chrysochloris asiatica] | GCF_000296735.1 | TRADDN-NCOA6 |

| acc            | architecture | len  | gen.name     | taxend     | species                      | define                                                                        | gca             | clade        |
|----------------|--------------|------|--------------|------------|------------------------------|-------------------------------------------------------------------------------|-----------------|--------------|
| XP_006876937.1 | TRADDN-NCOA6 | 2055 | NCOA6        | vertebrata | Chrysochloris asiatica       | PREDICTED: nuclear receptor coactivator 6 isoform X2 [Chrysochloris asiatica] | GCF_000296735.1 | TRADDN-NCOA6 |
| XP_006876938.1 | TRADDN-NCOA6 | 1084 | NCOA6        | vertebrata | Chrysochloris asiatica       | PREDICTED: nuclear receptor coactivator 6 isoform X3 [Chrysochloris asiatica] | GCF_000296735.1 | TRADDN-NCOA6 |
| KFP32585.1     | TRADDN-NCOA6 | 1786 | N325_05462   | vertebrata | Colius striatus              | Nuclear receptor coactivator 6, partial [Colius striatus]                     | GCA_000690715.1 | TRADDN-NCOA6 |
| XP_010202326.1 | TRADDN-NCOA6 | 1784 | NCOA6        | vertebrata | Colius striatus              | PREDICTED: nuclear receptor coactivator 6, partial [Colius striatus]          | GCF_000690715.1 | TRADDN-NCOA6 |
| XP_011784569.1 | TRADDN-NCOA6 | 2062 | NCOA6        | vertebrata | Colobus angolensis palliatus | PREDICTED: nuclear receptor coactivator 6 [Colobus angolensis palliatus]      | GCF_000951035.1 | TRADDN-NCOA6 |
| XP_013225784.1 | TRADDN-NCOA6 | 2050 | NCOA6        | vertebrata | Columba livia                | nuclear receptor coactivator 6 [Columba livia]                                | GCF_000337935.1 | TRADDN-NCOA6 |
| XP_012583760.1 | TRADDN-NCOA6 | 2066 | NCOA6        | vertebrata | Condylura cristata           | PREDICTED: nuclear receptor coactivator 6 isoform X1 [Condylura cristata]     | GCF_000260355.1 | TRADDN-NCOA6 |
| XP_012583761.1 | TRADDN-NCOA6 | 2055 | NCOA6        | vertebrata | Condylura cristata           | PREDICTED: nuclear receptor coactivator 6 isoform X2 [Condylura cristata]     | GCF_000260355.1 | TRADDN-NCOA6 |
| XP_012583762.1 | TRADDN-NCOA6 | 2041 | NCOA6        | vertebrata | Condylura cristata           | PREDICTED: nuclear receptor coactivator 6 isoform X3 [Condylura cristata]     | GCF_000260355.1 | TRADDN-NCOA6 |
| XP_012583763.1 | TRADDN-NCOA6 | 2037 | NCOA6        | vertebrata | Condylura cristata           | PREDICTED: nuclear receptor coactivator 6 isoform X4 [Condylura cristata]     | GCF_000260355.1 | TRADDN-NCOA6 |
| XP_012583764.1 | TRADDN-NCOA6 | 2032 | NCOA6        | vertebrata | Condylura cristata           | PREDICTED: nuclear receptor coactivator 6 isoform X5 [Condylura cristata]     | GCF_000260355.1 | TRADDN-NCOA6 |
| KFO54056.1     | TRADDN-NCOA6 | 1974 | N302_14124   | vertebrata | Corvus brachyrhynchos        | Nuclear receptor coactivator 6 [Corvus brachyrhynchos]                        | GCA_000691975.1 | TRADDN-NCOA6 |
| XP_017602427.1 | TRADDN-NCOA6 | 1035 | NCOA6        | vertebrata | Corvus brachyrhynchos        | PREDICTED: nuclear receptor coactivator 6 [Corvus brachyrhynchos]             | GCF_000691975.1 | TRADDN-NCOA6 |
| XP_019149598.1 | TRADDN-NCOA6 | 1048 | NCOA6        | vertebrata | Corvus cornix cornix         | nuclear receptor coactivator 6 [Corvus cornix cornix]                         | -               | TRADDN-NCOA6 |
| XP_015736734.1 | TRADDN-NCOA6 | 2049 | NCOA6        | vertebrata | Coturnix japonica            | PREDICTED: nuclear receptor coactivator 6 isoform X1 [Coturnix japonica]      | GCF_001577835.1 | TRADDN-NCOA6 |
| XP_015736736.1 | TRADDN-NCOA6 | 2043 | NCOA6        | vertebrata | Coturnix japonica            | PREDICTED: nuclear receptor coactivator 6 isoform X2 [Coturnix japonica]      | GCF_001577835.1 | TRADDN-NCOA6 |
| XP_015736737.1 | TRADDN-NCOA6 | 1981 | NCOA6        | vertebrata | Coturnix japonica            | PREDICTED: nuclear receptor coactivator 6 isoform X3 [Coturnix japonica]      | GCF_001577835.1 | TRADDN-NCOA6 |
| XP_015736738.1 | TRADDN-NCOA6 | 1777 | NCOA6        | vertebrata | Coturnix japonica            | PREDICTED: nuclear receptor coactivator 6 isoform X4 [Coturnix japonica]      | GCF_001577835.1 | TRADDN-NCOA6 |
| ERE71670.1     | TRADDN-NCOA6 | 2011 | H671_6g15530 | vertebrata | Cricetulus griseus           | nuclear receptor coactivator 6 isoform 1 [Cricetulus griseus]                 | GCA_000448345.1 | TRADDN-NCOA6 |

| acc            | architecture | len  | gen.name   | taxend     | species               | define                                                                           | gca             | clade        |
|----------------|--------------|------|------------|------------|-----------------------|----------------------------------------------------------------------------------|-----------------|--------------|
| XP_003501176.1 | TRADDN-NCOA6 | 2060 | Ncoa6      | vertebrata | Cricetulus griseus    | nuclear receptor coactivator 6 isoform X1 [Cricetulus griseus]                   | GCF_000223135.1 | TRADDN-NCOA6 |
| XP_007640016.1 | TRADDN-NCOA6 | 2059 | Ncoa6      | vertebrata | Cricetulus griseus    | nuclear receptor coactivator 6 isoform X2 [Cricetulus griseus]                   | GCF_000223135.1 | TRADDN-NCOA6 |
| XP_007640017.1 | TRADDN-NCOA6 | 2017 | Ncoa6      | vertebrata | Cricetulus griseus    | nuclear receptor coactivator 6 isoform X5 [Cricetulus griseus]                   | GCF_000223135.1 | TRADDN-NCOA6 |
| XP_016830462.1 | TRADDN-NCOA6 | 2049 | Ncoa6      | vertebrata | Cricetulus griseus    | nuclear receptor coactivator 6 isoform X3 [Cricetulus griseus]                   | GCF_000223135.1 | TRADDN-NCOA6 |
| XP_016830463.1 | TRADDN-NCOA6 | 2048 | Ncoa6      | vertebrata | Cricetulus griseus    | nuclear receptor coactivator 6 isoform X4 [Cricetulus griseus]                   | GCF_000223135.1 | TRADDN-NCOA6 |
| XP_019395281.1 | TRADDN-NCOA6 | 2038 | NCOA6      | vertebrata | Crocodylus porosus    | PREDICTED: nuclear receptor coactivator 6 isoform X1 [Crocodylus porosus]        | GCF_001723895.1 | TRADDN-NCOA6 |
| XP_019395282.1 | TRADDN-NCOA6 | 1976 | NCOA6      | vertebrata | Crocodylus porosus    | PREDICTED: nuclear receptor coactivator 6 isoform X2 [Crocodylus porosus]        | GCF_001723895.1 | TRADDN-NCOA6 |
| KFO79464.1     | TRADDN-NCOA6 | 2048 | N303_12473 | vertebrata | Cuculus canorus       | Nuclear receptor coactivator 6 [Cuculus canorus]                                 | GCA_000709325.1 | TRADDN-NCOA6 |
| XP_009563652.1 | TRADDN-NCOA6 | 2040 | NCOA6      | vertebrata | Cuculus canorus       | PREDICTED: LOW QUALITY PROTEIN: nuclear receptor coactivator 6 [Cuculus canorus] | GCF_000709325.1 | TRADDN-NCOA6 |
| XP_023795796.1 | TRADDN-NCOA6 | 2029 | NCOA6      | vertebrata | Cyanistes caeruleus   | LOW QUALITY PROTEIN: nuclear receptor coactivator 6 [Cyanistes caeruleus]        | GCF_002901205.1 | TRADDN-NCOA6 |
| XP_012379285.1 | TRADDN-NCOA6 | 2082 | NCOA6      | vertebrata | Dasypus novemcinctus  | nuclear receptor coactivator 6 isoform X2 [Dasypus novemcinctus]                 | GCF_000208655.1 | TRADDN-NCOA6 |
| XP_012379286.1 | TRADDN-NCOA6 | 2072 | NCOA6      | vertebrata | Dasypus novemcinctus  | nuclear receptor coactivator 6 isoform X3 [Dasypus novemcinctus]                 | GCF_000208655.1 | TRADDN-NCOA6 |
| XP_012379287.1 | TRADDN-NCOA6 | 2071 | NCOA6      | vertebrata | Dasypus novemcinctus  | nuclear receptor coactivator 6 isoform X4 [Dasypus novemcinctus]                 | GCF_000208655.1 | TRADDN-NCOA6 |
| XP_023443533.1 | TRADDN-NCOA6 | 2083 | NCOA6      | vertebrata | Dasypus novemcinctus  | nuclear receptor coactivator 6 isoform X1 [Dasypus novemcinctus]                 | GCF_000208655.1 | TRADDN-NCOA6 |
| XP_022448316.1 | TRADDN-NCOA6 | 2037 | NCOA6      | vertebrata | Delphinapterus leucas | nuclear receptor coactivator 6 isoform X1 [Delphinapterus leucas]                | GCF_002288925.2 | TRADDN-NCOA6 |
| XP_022448319.1 | TRADDN-NCOA6 | 2036 | NCOA6      | vertebrata | Delphinapterus leucas | nuclear receptor coactivator 6 isoform X2 [Delphinapterus leucas]                | GCF_002288925.2 | TRADDN-NCOA6 |
| XP_022448320.1 | TRADDN-NCOA6 | 2026 | NCOA6      | vertebrata | Delphinapterus leucas | nuclear receptor coactivator 6 isoform X3 [Delphinapterus leucas]                | GCF_002288925.2 | TRADDN-NCOA6 |
| XP_022448321.1 | TRADDN-NCOA6 | 2025 | NCOA6      | vertebrata | Delphinapterus leucas | nuclear receptor coactivator 6 isoform X4 [Delphinapterus leucas]                | GCF_002288925.2 | TRADDN-NCOA6 |
| XP_024415488.1 | TRADDN-NCOA6 | 2066 | NCOA6      | vertebrata | Desmodus rotundus     | nuclear receptor coactivator 6 isoform X1 [Desmodus rotundus]                    | GCF_002940915.1 | TRADDN-NCOA6 |
| XP_024415490.1 | TRADDN-NCOA6 | 2065 | NCOA6      | vertebrata | Desmodus rotundus     | nuclear receptor coactivator 6 isoform X2 [Desmodus rotundus]                    | GCF_002940915.1 | TRADDN-NCOA6 |
| XP_024415491.1 | TRADDN-NCOA6 | 2055 | NCOA6      | vertebrata | Desmodus rotundus     | nuclear receptor coactivator 6 isoform X3 [Desmodus rotundus]                    | GCF_002940915.1 | TRADDN-NCOA6 |
| XP_024415492.1 | TRADDN-NCOA6 | 2054 | NCOA6      | vertebrata | Desmodus rotundus     | nuclear receptor coactivator 6 isoform X4 [Desmodus rotundus]                    | GCF_002940915.1 | TRADDN-NCOA6 |
| XP_012866403.1 | TRADDN-NCOA6 | 2056 | Ncoa6      | vertebrata | Dipodomys ordii       | PREDICTED: nuclear receptor coactivator 6 isoform X1 [Dipodomys ordii]           | GCF_000151885.1 | TRADDN-NCOA6 |

| acc            | architecture | len  | gen.name     | taxend     | species                | define                                                                                 | gca             | clade        |
|----------------|--------------|------|--------------|------------|------------------------|----------------------------------------------------------------------------------------|-----------------|--------------|
| XP_012866405.1 | TRADDN-NCOA6 | 2055 | Ncoa6        | vertebrata | Dipodomys ordii        | PREDICTED: nuclear receptor coactivator 6 isoform X2 [Dipodomys ordii]                 | GCF_000151885.1 | TRADDN-NCOA6 |
| XP_012866406.1 | TRADDN-NCOA6 | 2033 | Ncoa6        | vertebrata | Dipodomys ordii        | PREDICTED: nuclear receptor coactivator 6 isoform X3 [Dipodomys ordii]                 | GCF_000151885.1 | TRADDN-NCOA6 |
| XP_012866407.1 | TRADDN-NCOA6 | 2032 | Ncoa6        | vertebrata | Dipodomys ordii        | PREDICTED: nuclear receptor coactivator 6 isoform X4 [Dipodomys ordii]                 | GCF_000151885.1 | TRADDN-NCOA6 |
| XP_004698295.1 | TRADDN-NCOA6 | 2050 | NCOA6        | vertebrata | Echinops telfairi      | PREDICTED: nuclear receptor coactivator 6 [Echinops telfairi]                          | GCF_000313985.2 | TRADDN-NCOA6 |
| XP_009636267.1 | TRADDN-NCOA6 | 1048 | NCOA6        | vertebrata | Egretta garzetta       | PREDICTED: nuclear receptor coactivator 6 [Egretta garzetta]                           | GCF_000687185.1 | TRADDN-NCOA6 |
| XP_006903722.1 | TRADDN-NCOA6 | 2060 | NCOA6        | vertebrata | Elephantulus edwardii  | PREDICTED: LOW QUALITY PROTEIN: nuclear receptor coactivator 6 [Elephantulus edwardii] | GCF_000299155.1 | TRADDN-NCOA6 |
| XP_022349547.1 | TRADDN-NCOA6 | 2064 | LOC111141360 | vertebrata | Enhydra lutris kenyoni | nuclear receptor coactivator 6 isoform X1 [Enhydra lutris kenyoni]                     | GCF_002288905.1 | TRADDN-NCOA6 |
| XP_008147929.1 | TRADDN-NCOA6 | 2059 | NCOA6        | vertebrata | Eptesicus fuscus       | PREDICTED: nuclear receptor coactivator 6 isoform X1 [Eptesicus fuscus]                | -               | TRADDN-NCOA6 |
| XP_008147930.1 | TRADDN-NCOA6 | 1971 | NCOA6        | vertebrata | Eptesicus fuscus       | PREDICTED: nuclear receptor coactivator 6 isoform X2 [Eptesicus fuscus]                | -               | TRADDN-NCOA6 |
| XP_008147931.1 | TRADDN-NCOA6 | 1064 | NCOA6        | vertebrata | Eptesicus fuscus       | PREDICTED: nuclear receptor coactivator 6 isoform X3 [Eptesicus fuscus]                | -               | TRADDN-NCOA6 |
| XP_014686953.1 | TRADDN-NCOA6 | 2062 | NCOA6        | vertebrata | Equus asinus           | PREDICTED: nuclear receptor coactivator 6 isoform X1 [Equus asinus]                    | GCF_001305755.1 | TRADDN-NCOA6 |
| XP_014686954.1 | TRADDN-NCOA6 | 2061 | NCOA6        | vertebrata | Equus asinus           | PREDICTED: nuclear receptor coactivator 6 isoform X2 [Equus asinus]                    | GCF_001305755.1 | TRADDN-NCOA6 |
| XP_014686955.1 | TRADDN-NCOA6 | 2051 | NCOA6        | vertebrata | Equus asinus           | PREDICTED: nuclear receptor coactivator 6 isoform X3 [Equus asinus]                    | GCF_001305755.1 | TRADDN-NCOA6 |
| XP_014686956.1 | TRADDN-NCOA6 | 2050 | NCOA6        | vertebrata | Equus asinus           | PREDICTED: nuclear receptor coactivator 6 isoform X4 [Equus asinus]                    | GCF_001305755.1 | TRADDN-NCOA6 |
| XP_014686957.1 | TRADDN-NCOA6 | 1962 | NCOA6        | vertebrata | Equus asinus           | PREDICTED: nuclear receptor coactivator 6 isoform X5 [Equus asinus]                    | GCF_001305755.1 | TRADDN-NCOA6 |
| XP_023482163.1 | TRADDN-NCOA6 | 2062 | NCOA6        | vertebrata | Equus caballus         | nuclear receptor coactivator 6 isoform X1 [Equus caballus]                             | GCF_002863925.1 | TRADDN-NCOA6 |
| XP_023482168.1 | TRADDN-NCOA6 | 2061 | NCOA6        | vertebrata | Equus caballus         | nuclear receptor coactivator 6 isoform X2 [Equus caballus]                             | GCF_002863925.1 | TRADDN-NCOA6 |
| XP_023482169.1 | TRADDN-NCOA6 | 2051 | NCOA6        | vertebrata | Equus caballus         | nuclear receptor coactivator 6 isoform X3 [Equus caballus]                             | GCF_002863925.1 | TRADDN-NCOA6 |
| XP_023482170.1 | TRADDN-NCOA6 | 2050 | NCOA6        | vertebrata | Equus caballus         | nuclear receptor coactivator 6 isoform X4 [Equus caballus]                             | GCF_002863925.1 | TRADDN-NCOA6 |
| XP_023482171.1 | TRADDN-NCOA6 | 1962 | NCOA6        | vertebrata | Equus caballus         | nuclear receptor coactivator 6 isoform X5 [Equus caballus]                             | GCF_002863925.1 | TRADDN-NCOA6 |

| acc            | architecture | len  | gen.name   | taxend     | species             | define                                                                            | gca             | clade        |
|----------------|--------------|------|------------|------------|---------------------|-----------------------------------------------------------------------------------|-----------------|--------------|
| XP_023482172.1 | TRADDN-NCOA6 | 1066 | NCOA6      | vertebrata | Equus caballus      | nuclear receptor coactivator 6 isoform X6 [Equus caballus]                        | GCF_002863925.1 | TRADDN-NCOA6 |
| XP_008522723.1 | TRADDN-NCOA6 | 2061 | NCOA6      | vertebrata | Equus przewalskii   | PREDICTED: nuclear receptor coactivator 6 isoform X1 [Equus przewalskii]          | GCF_000696695.1 | TRADDN-NCOA6 |
| XP_008522724.1 | TRADDN-NCOA6 | 2060 | NCOA6      | vertebrata | Equus przewalskii   | PREDICTED: nuclear receptor coactivator 6 isoform X2 [Equus przewalskii]          | GCF_000696695.1 | TRADDN-NCOA6 |
| XP_008522725.1 | TRADDN-NCOA6 | 2050 | NCOA6      | vertebrata | Equus przewalskii   | PREDICTED: nuclear receptor coactivator 6 isoform X3 [Equus przewalskii]          | GCF_000696695.1 | TRADDN-NCOA6 |
| XP_008522726.1 | TRADDN-NCOA6 | 2049 | NCOA6      | vertebrata | Equus przewalskii   | PREDICTED: nuclear receptor coactivator 6 isoform X4 [Equus przewalskii]          | GCF_000696695.1 | TRADDN-NCOA6 |
| XP_008522727.1 | TRADDN-NCOA6 | 1065 | NCOA6      | vertebrata | Equus przewalskii   | PREDICTED: nuclear receptor coactivator 6 isoform X5 [Equus przewalskii]          | GCF_000696695.1 | TRADDN-NCOA6 |
| XP_007522722.1 | TRADDN-NCOA6 | 2050 | NCOA6      | vertebrata | Erinaceus europaeus | PREDICTED: nuclear receptor coactivator 6 isoform X1 [Erinaceus europaeus]        | GCF_000296755.1 | TRADDN-NCOA6 |
| XP_016043446.1 | TRADDN-NCOA6 | 2049 | NCOA6      | vertebrata | Erinaceus europaeus | PREDICTED: nuclear receptor coactivator 6 isoform X2 [Erinaceus europaeus]        | GCF_000296755.1 | TRADDN-NCOA6 |
| XP_016043447.1 | TRADDN-NCOA6 | 2039 | NCOA6      | vertebrata | Erinaceus europaeus | PREDICTED: nuclear receptor coactivator 6 isoform X3 [Erinaceus europaeus]        | GCF_000296755.1 | TRADDN-NCOA6 |
| KFV93685.1     | TRADDN-NCOA6 | 170  | N326_02781 | vertebrata | Eurypyga helias     | Nuclear receptor coactivator 6, partial [Eurypyga helias]                         | GCA_000690775.1 | TRADDN-NCOA6 |
| XP_014132069.1 | TRADDN-NCOA6 | 2040 | NCOA6      | vertebrata | Falco cherrug       | PREDICTED: nuclear receptor coactivator 6 isoform X1 [Falco cherrug]              | -               | TRADDN-NCOA6 |
| XP_014132070.1 | TRADDN-NCOA6 | 2039 | NCOA6      | vertebrata | Falco cherrug       | PREDICTED: nuclear receptor coactivator 6 isoform X2 [Falco cherrug]              | GCF_000337975.1 | TRADDN-NCOA6 |
| XP_014132071.1 | TRADDN-NCOA6 | 1978 | NCOA6      | vertebrata | Falco cherrug       | PREDICTED: nuclear receptor coactivator 6 isoform X3 [Falco cherrug]              | -               | TRADDN-NCOA6 |
| XP_014132072.1 | TRADDN-NCOA6 | 1978 | NCOA6      | vertebrata | Falco cherrug       | PREDICTED: nuclear receptor coactivator 6 isoform X4 [Falco cherrug]              | -               | TRADDN-NCOA6 |
| XP_013153127.1 | TRADDN-NCOA6 | 2033 | NCOA6      | vertebrata | Falco peregrinus    | PREDICTED: LOW QUALITY PROTEIN: nuclear receptor coactivator 6 [Falco peregrinus] | -               | TRADDN-NCOA6 |
| XP_011279160.2 | TRADDN-NCOA6 | 2080 | NCOA6      | vertebrata | Felis catus         | nuclear receptor coactivator 6 isoform X1 [Felis catus]                           | GCF_000181335.3 | TRADDN-NCOA6 |
| XP_011279164.2 | TRADDN-NCOA6 | 2079 | NCOA6      | vertebrata | Felis catus         | nuclear receptor coactivator 6 isoform X2 [Felis catus]                           | GCF_000181335.3 | TRADDN-NCOA6 |
| XP_011279167.2 | TRADDN-NCOA6 | 1078 | NCOA6      | vertebrata | Felis catus         | nuclear receptor coactivator 6 isoform X3 [Felis catus]                           | GCF_000181335.3 | TRADDN-NCOA6 |
| XP_005057019.1 | TRADDN-NCOA6 | 1049 | NCOA6      | vertebrata | Ficedula albicollis | PREDICTED: nuclear receptor coactivator 6 [Ficedula albicollis]                   | GCF_000247815.1 | TRADDN-NCOA6 |

| acc            | architecture | len  | gen.name   | taxend     | species                 | define                                                                         | gca             | clade        |
|----------------|--------------|------|------------|------------|-------------------------|--------------------------------------------------------------------------------|-----------------|--------------|
| KFO35537.1     | TRADDN-NCOA6 | 96   | H920_03038 | vertebrata | Fukomys damarensis      | Nuclear receptor coactivator 6 [Fukomys damarensis]                            | GCA_000743615.1 | TRADDN-NCOA6 |
| XP_010638228.1 | TRADDN-NCOA6 | 2063 | Ncoa6      | vertebrata | Fukomys damarensis      | PREDICTED: nuclear receptor coactivator 6 isoform X1 [Fukomys damarensis]      | GCF_000743615.1 | TRADDN-NCOA6 |
| XP_010638232.1 | TRADDN-NCOA6 | 2052 | Ncoa6      | vertebrata | Fukomys damarensis      | PREDICTED: nuclear receptor coactivator 6 isoform X2 [Fukomys damarensis]      | GCF_000743615.1 | TRADDN-NCOA6 |
| XP_010638233.1 | TRADDN-NCOA6 | 2051 | Ncoa6      | vertebrata | Fukomys damarensis      | PREDICTED: nuclear receptor coactivator 6 isoform X3 [Fukomys damarensis]      | GCF_000743615.1 | TRADDN-NCOA6 |
| XP_010638234.1 | TRADDN-NCOA6 | 1077 | Ncoa6      | vertebrata | Fukomys damarensis      | PREDICTED: nuclear receptor coactivator 6 isoform X4 [Fukomys damarensis]      | GCF_000743615.1 | TRADDN-NCOA6 |
| KFV90230.1     | TRADDN-NCOA6 | 170  | N327_10484 | vertebrata | Fulmarus glacialis      | Nuclear receptor coactivator 6, partial [Fulmarus glacialis]                   | GCA_000690835.1 | TRADDN-NCOA6 |
| XP_008569466.1 | TRADDN-NCOA6 | 2059 | NCOA6      | vertebrata | Galeopterus variegatus  | PREDICTED: nuclear receptor coactivator 6 [Galeopterus variegatus]             | GCF_000696425.1 | TRADDN-NCOA6 |
| XP_004946924.1 | TRADDN-NCOA6 | 1969 | NCOA6      | vertebrata | Gallus gallus           | nuclear receptor coactivator 6 isoform X5 [Gallus gallus]                      | GCF_000002315.5 | TRADDN-NCOA6 |
| XP_015151765.1 | TRADDN-NCOA6 | 2054 | NCOA6      | vertebrata | Gallus gallus           | nuclear receptor coactivator 6 isoform X1 [Gallus gallus]                      | GCF_000002315.5 | TRADDN-NCOA6 |
| XP_015151766.1 | TRADDN-NCOA6 | 2031 | NCOA6      | vertebrata | Gallus gallus           | nuclear receptor coactivator 6 isoform X2 [Gallus gallus]                      | GCF_000002315.5 | TRADDN-NCOA6 |
| XP_015151767.1 | TRADDN-NCOA6 | 1994 | NCOA6      | vertebrata | Gallus gallus           | nuclear receptor coactivator 6 isoform X3 [Gallus gallus]                      | GCF_000002315.5 | TRADDN-NCOA6 |
| XP_015151768.1 | TRADDN-NCOA6 | 1992 | NCOA6      | vertebrata | Gallus gallus           | nuclear receptor coactivator 6 isoform X4 [Gallus gallus]                      | GCF_000002315.5 | TRADDN-NCOA6 |
| KFV42278.1     | TRADDN-NCOA6 | 170  | N328_08716 | vertebrata | Gavia stellata          | Nuclear receptor coactivator 6, partial [Gavia stellata]                       | GCA_000690875.1 | TRADDN-NCOA6 |
| XP_019368618.1 | TRADDN-NCOA6 | 2038 | NCOA6      | vertebrata | Gavialis gangeticus     | PREDICTED: nuclear receptor coactivator 6 isoform X5 [Gavialis gangeticus]     | GCF_001723915.1 | TRADDN-NCOA6 |
| XP_015268900.1 | TRADDN-NCOA6 | 2038 | NCOA6      | vertebrata | Gekko japonicus         | PREDICTED: nuclear receptor coactivator 6 [Gekko japonicus]                    | GCF_001447785.1 | TRADDN-NCOA6 |
| XP_014165548.1 | TRADDN-NCOA6 | 1966 | NCOA6      | vertebrata | Geospiza fortis         | PREDICTED: nuclear receptor coactivator 6 [Geospiza fortis]                    | -               | TRADDN-NCOA6 |
| XP_018872830.1 | TRADDN-NCOA6 | 2070 | NCOA6      | vertebrata | Gorilla gorilla gorilla | PREDICTED: nuclear receptor coactivator 6 isoform X1 [Gorilla gorilla gorilla] | -               | TRADDN-NCOA6 |
| XP_018872831.1 | TRADDN-NCOA6 | 2069 | NCOA6      | vertebrata | Gorilla gorilla gorilla | PREDICTED: nuclear receptor coactivator 6 isoform X2 [Gorilla gorilla gorilla] | -               | TRADDN-NCOA6 |
| XP_018872832.1 | TRADDN-NCOA6 | 2059 | NCOA6      | vertebrata | Gorilla gorilla gorilla | PREDICTED: nuclear receptor coactivator 6 isoform X3 [Gorilla gorilla gorilla] | -               | TRADDN-NCOA6 |
| XP_018872833.1 | TRADDN-NCOA6 | 2058 | NCOA6      | vertebrata | Gorilla gorilla gorilla | PREDICTED: nuclear receptor coactivator 6 isoform X4 [Gorilla gorilla gorilla] | -               | TRADDN-NCOA6 |

| acc            | architecture | len  | gen.name     | taxend     | species                  | define                                                                                     | gca             | clade        |
|----------------|--------------|------|--------------|------------|--------------------------|--------------------------------------------------------------------------------------------|-----------------|--------------|
| XP_018872834.1 | TRADDN-NCOA6 | 1982 | NCOA6        | vertebrata | Gorilla gorilla gorilla  | PREDICTED: nuclear receptor coactivator 6 isoform X5 [Gorilla gorilla gorilla]             | -               | TRADDN-NCOA6 |
| XP_018872835.1 | TRADDN-NCOA6 | 1076 | NCOA6        | vertebrata | Gorilla gorilla gorilla  | PREDICTED: nuclear receptor coactivator 6 isoform X6 [Gorilla gorilla gorilla]             | -               | TRADDN-NCOA6 |
| XP_009920176.1 | TRADDN-NCOA6 | 2045 | LOC104319919 | vertebrata | Haliaeetus albicilla     | PREDICTED: LOW QUALITY PROTEIN: nuclear receptor coactivator 6-like [Haliaeetus albicilla] | GCF_000691405.1 | TRADDN-NCOA6 |
| XP_010562854.1 | TRADDN-NCOA6 | 2061 | NCOA6        | vertebrata | Haliaeetus leucocephalus | PREDICTED: nuclear receptor coactivator 6 isoform X1 [Haliaeetus leucocephalus]            | GCF_000737465.1 | TRADDN-NCOA6 |
| XP_010562861.1 | TRADDN-NCOA6 | 2053 | NCOA6        | vertebrata | Haliaeetus leucocephalus | PREDICTED: nuclear receptor coactivator 6 isoform X2 [Haliaeetus leucocephalus]            | GCF_000737465.1 | TRADDN-NCOA6 |
| XP_010562862.1 | TRADDN-NCOA6 | 2052 | NCOA6        | vertebrata | Haliaeetus leucocephalus | PREDICTED: nuclear receptor coactivator 6 isoform X3 [Haliaeetus leucocephalus]            | GCF_000737465.1 | TRADDN-NCOA6 |
| XP_010562863.1 | TRADDN-NCOA6 | 2050 | NCOA6        | vertebrata | Haliaeetus leucocephalus | PREDICTED: nuclear receptor coactivator 6 isoform X4 [Haliaeetus leucocephalus]            | GCF_000737465.1 | TRADDN-NCOA6 |
| XP_010562864.1 | TRADDN-NCOA6 | 2012 | NCOA6        | vertebrata | Haliaeetus leucocephalus | PREDICTED: nuclear receptor coactivator 6 isoform X5 [Haliaeetus leucocephalus]            | GCF_000737465.1 | TRADDN-NCOA6 |
| XP_010562865.1 | TRADDN-NCOA6 | 1993 | NCOA6        | vertebrata | Haliaeetus leucocephalus | PREDICTED: nuclear receptor coactivator 6 isoform X6 [Haliaeetus leucocephalus]            | GCF_000737465.1 | TRADDN-NCOA6 |
| XP_010562867.1 | TRADDN-NCOA6 | 1991 | NCOA6        | vertebrata | Haliaeetus leucocephalus | PREDICTED: nuclear receptor coactivator 6 isoform X7 [Haliaeetus leucocephalus]            | GCF_000737465.1 | TRADDN-NCOA6 |
| XP_010562869.1 | TRADDN-NCOA6 | 1739 | NCOA6        | vertebrata | Haliaeetus leucocephalus | PREDICTED: nuclear receptor coactivator 6 isoform X9 [Haliaeetus leucocephalus]            | GCF_000737465.1 | TRADDN-NCOA6 |
| XP_010562870.1 | TRADDN-NCOA6 | 455  | NCOA6        | vertebrata | Haliaeetus leucocephalus | PREDICTED: nuclear receptor coactivator 6 isoform X10 [Haliaeetus leucocephalus]           | GCF_000737465.1 | TRADDN-NCOA6 |
| XP_010562871.1 | TRADDN-NCOA6 | 232  | NCOA6        | vertebrata | Haliaeetus leucocephalus | PREDICTED: nuclear receptor coactivator 6 isoform X11 [Haliaeetus leucocephalus]           | GCF_000737465.1 | TRADDN-NCOA6 |
| EHB08380.1     | TRADDN-NCOA6 | 117  | GW7_03039    | vertebrata | Heterocephalus glaber    | Nuclear receptor coactivator 6 [Heterocephalus glaber]                                     | GCA_000230445.1 | TRADDN-NCOA6 |
| EHB17144.1     | TRADDN-NCOA6 | 380  | GW7_21530    | vertebrata | Heterocephalus glaber    | Nuclear receptor coactivator 6 [Heterocephalus glaber]                                     | GCA_000230445.1 | TRADDN-NCOA6 |
| XP_004867960.1 | TRADDN-NCOA6 | 2056 | Ncoa6        | vertebrata | Heterocephalus glaber    | nuclear receptor coactivator 6 isoform X1 [Heterocephalus glaber]                          | GCF_000247695.1 | TRADDN-NCOA6 |
| XP_004867962.1 | TRADDN-NCOA6 | 2045 | Ncoa6        | vertebrata | Heterocephalus glaber    | nuclear receptor coactivator 6 isoform X2 [Heterocephalus glaber]                          | GCF_000247695.1 | TRADDN-NCOA6 |
| XP_004867963.1 | TRADDN-NCOA6 | 2044 | Ncoa6        | vertebrata | Heterocephalus glaber    | nuclear receptor coactivator 6 isoform X3 [Heterocephalus glaber]                          | GCF_000247695.1 | TRADDN-NCOA6 |
| XP_021102557.1 | TRADDN-NCOA6 | 1956 | Ncoa6        | vertebrata | Heterocephalus glaber    | nuclear receptor coactivator 6 isoform X4 [Heterocephalus glaber]                          | GCF_000247695.1 | TRADDN-NCOA6 |



| acc            | architecture | len  | gen.name                       | taxend     | species               | define                                                                      | gca              | clade        |
|----------------|--------------|------|--------------------------------|------------|-----------------------|-----------------------------------------------------------------------------|------------------|--------------|
| XP_021102558.1 | TRADDN-NCOA6 | 1949 | Ncoa6                          | vertebrata | Heterocephalus glaber | nuclear receptor coactivator 6 isoform X5 [Heterocephalus glaber]           | GCF_000247695.1  | TRADDN-NCOA6 |
| XP_021102559.1 | TRADDN-NCOA6 | 1945 | Ncoa6                          | vertebrata | Heterocephalus glaber | nuclear receptor coactivator 6 isoform X6 [Heterocephalus glaber]           | GCF_000247695.1  | TRADDN-NCOA6 |
| XP_021102560.1 | TRADDN-NCOA6 | 1944 | Ncoa6                          | vertebrata | Heterocephalus glaber | nuclear receptor coactivator 6 isoform X7 [Heterocephalus glaber]           | GCF_000247695.1  | TRADDN-NCOA6 |
| XP_021102561.1 | TRADDN-NCOA6 | 1938 | Ncoa6                          | vertebrata | Heterocephalus glaber | nuclear receptor coactivator 6 isoform X8 [Heterocephalus glaber]           | GCF_000247695.1  | TRADDN-NCOA6 |
| XP_021102562.1 | TRADDN-NCOA6 | 1937 | Ncoa6                          | vertebrata | Heterocephalus glaber | nuclear receptor coactivator 6 isoform X9 [Heterocephalus glaber]           | GCF_000247695.1  | TRADDN-NCOA6 |
| XP_021102563.1 | TRADDN-NCOA6 | 1825 | Ncoa6                          | vertebrata | Heterocephalus glaber | nuclear receptor coactivator 6 isoform X10 [Heterocephalus glaber]          | GCF_000247695.1  | TRADDN-NCOA6 |
| XP_021102564.1 | TRADDN-NCOA6 | 1066 | Ncoa6                          | vertebrata | Heterocephalus glaber | nuclear receptor coactivator 6 isoform X11 [Heterocephalus glaber]          | GCF_000247695.1  | TRADDN-NCOA6 |
| XP_019510722.1 | TRADDN-NCOA6 | 2019 | NCOA6                          | vertebrata | Hipposideros armiger  | PREDICTED: nuclear receptor coactivator 6 isoform X1 [Hipposideros armiger] | GCF_001890085.1  | TRADDN-NCOA6 |
| XP_019510725.1 | TRADDN-NCOA6 | 2018 | NCOA6                          | vertebrata | Hipposideros armiger  | PREDICTED: nuclear receptor coactivator 6 isoform X2 [Hipposideros armiger] | GCF_001890085.1  | TRADDN-NCOA6 |
| XP_019510726.1 | TRADDN-NCOA6 | 2008 | NCOA6                          | vertebrata | Hipposideros armiger  | PREDICTED: nuclear receptor coactivator 6 isoform X3 [Hipposideros armiger] | GCF_001890085.1  | TRADDN-NCOA6 |
| XP_019510727.1 | TRADDN-NCOA6 | 2007 | NCOA6                          | vertebrata | Hipposideros armiger  | PREDICTED: nuclear receptor coactivator 6 isoform X4 [Hipposideros armiger] | GCF_001890085.1  | TRADDN-NCOA6 |
| XP_019510728.1 | TRADDN-NCOA6 | 1996 | NCOA6                          | vertebrata | Hipposideros armiger  | PREDICTED: nuclear receptor coactivator 6 isoform X5 [Hipposideros armiger] | GCF_001890085.1  | TRADDN-NCOA6 |
| XP_019510730.1 | TRADDN-NCOA6 | 1995 | NCOA6                          | vertebrata | Hipposideros armiger  | PREDICTED: nuclear receptor coactivator 6 isoform X6 [Hipposideros armiger] | GCF_001890085.1  | TRADDN-NCOA6 |
| XP_019510731.1 | TRADDN-NCOA6 | 1947 | NCOA6                          | vertebrata | Hipposideros armiger  | PREDICTED: nuclear receptor coactivator 6 isoform X7 [Hipposideros armiger] | GCF_001890085.1  | TRADDN-NCOA6 |
| XP_019510732.1 | TRADDN-NCOA6 | 1919 | NCOA6                          | vertebrata | Hipposideros armiger  | PREDICTED: nuclear receptor coactivator 6 isoform X8 [Hipposideros armiger] | GCF_001890085.1  | TRADDN-NCOA6 |
| XP_019510733.1 | TRADDN-NCOA6 | 1020 | NCOA6                          | vertebrata | Hipposideros armiger  | PREDICTED: nuclear receptor coactivator 6 isoform X9 [Hipposideros armiger] | GCF_001890085.1  | TRADDN-NCOA6 |
| AAF13595.1     | TRADDN-NCOA6 | 2063 | ASC2                           | vertebrata | Homo sapiens          | cancer-amplified transcriptional coactivator ASC-2 [Homo sapiens]           | -                | TRADDN-NCOA6 |
| AAF16403.1     | TRADDN-NCOA6 | 2001 | AIB3                           | vertebrata | Homo sapiens          | transcriptional coactivator AIB3 [Homo sapiens]                             | -                | TRADDN-NCOA6 |
| AAI14614.1     | TRADDN-NCOA6 | 357  | AIB3                           | vertebrata | Homo sapiens          | NCOA6 protein, partial [Homo sapiens]                                       | -                | TRADDN-NCOA6 |
| AEG79566.1     | TRADDN-NCOA6 | 982  | NCOA6                          | vertebrata | Homo sapiens          | nuclear receptor coactivator-6 delta [Homo sapiens]                         | -                | TRADDN-NCOA6 |
| NP_001229468.1 | TRADDN-NCOA6 | 1070 | AIB3,ASC2,NRC,PRIP,RAP250,TRBP | vertebrata | Homo sapiens          | nuclear receptor coactivator 6 isoform 2 [Homo sapiens]                     | GCF_000001405.39 | TRADDN-NCOA6 |

| acc            | architecture | len  | gen.name                       | taxend     | species                    | define                                                                     | gca              | clade        |
|----------------|--------------|------|--------------------------------|------------|----------------------------|----------------------------------------------------------------------------|------------------|--------------|
| NP_054790.2    | TRADDN-NCOA6 | 2063 | AIB3,ASC2,NRC,PRIP,RAP250,TRBP | vertebrata | Homo sapiens               | nuclear receptor coactivator 6 isoform 1 [Homo sapiens]                    | GCF_000001405.39 | TRADDN-NCOA6 |
| XP_006723818.1 | TRADDN-NCOA6 | 1975 | AIB3,ASC2,NRC,PRIP,RAP250,TRBP | vertebrata | Homo sapiens               | nuclear receptor coactivator 6 isoform X11 [Homo sapiens]                  | GCF_000001405.39 | TRADDN-NCOA6 |
| XP_011527023.1 | TRADDN-NCOA6 | 2068 | AIB3,ASC2,NRC,PRIP,RAP250,TRBP | vertebrata | Homo sapiens               | nuclear receptor coactivator 6 isoform X4 [Homo sapiens]                   | GCF_000001405.39 | TRADDN-NCOA6 |
| XP_011527028.1 | TRADDN-NCOA6 | 2057 | AIB3,ASC2,NRC,PRIP,RAP250,TRBP | vertebrata | Homo sapiens               | nuclear receptor coactivator 6 isoform X6 [Homo sapiens]                   | GCF_000001405.39 | TRADDN-NCOA6 |
| XP_011527029.1 | TRADDN-NCOA6 | 2056 | AIB3,ASC2,NRC,PRIP,RAP250,TRBP | vertebrata | Homo sapiens               | nuclear receptor coactivator 6 isoform X7 [Homo sapiens]                   | GCF_000001405.39 | TRADDN-NCOA6 |
| XP_016883228.1 | TRADDN-NCOA6 | 2087 | AIB3,ASC2,NRC,PRIP,RAP250,TRBP | vertebrata | Homo sapiens               | nuclear receptor coactivator 6 isoform X1 [Homo sapiens]                   | GCF_000001405.39 | TRADDN-NCOA6 |
| XP_016883230.1 | TRADDN-NCOA6 | 2086 | AIB3,ASC2,NRC,PRIP,RAP250,TRBP | vertebrata | Homo sapiens               | nuclear receptor coactivator 6 isoform X2 [Homo sapiens]                   | GCF_000001405.39 | TRADDN-NCOA6 |
| XP_016883231.1 | TRADDN-NCOA6 | 2082 | AIB3,ASC2,NRC,PRIP,RAP250,TRBP | vertebrata | Homo sapiens               | nuclear receptor coactivator 6 isoform X3 [Homo sapiens]                   | GCF_000001405.39 | TRADDN-NCOA6 |
| XP_016883232.1 | TRADDN-NCOA6 | 2058 | AIB3,ASC2,NRC,PRIP,RAP250,TRBP | vertebrata | Homo sapiens               | nuclear receptor coactivator 6 isoform X5 [Homo sapiens]                   | GCF_000001405.39 | TRADDN-NCOA6 |
| XP_016883233.1 | TRADDN-NCOA6 | 2051 | AIB3,ASC2,NRC,PRIP,RAP250,TRBP | vertebrata | Homo sapiens               | nuclear receptor coactivator 6 isoform X8 [Homo sapiens]                   | GCF_000001405.39 | TRADDN-NCOA6 |
| XP_016883234.1 | TRADDN-NCOA6 | 2039 | AIB3,ASC2,NRC,PRIP,RAP250,TRBP | vertebrata | Homo sapiens               | nuclear receptor coactivator 6 isoform X9 [Homo sapiens]                   | GCF_000001405.39 | TRADDN-NCOA6 |
| XP_016883235.1 | TRADDN-NCOA6 | 1999 | AIB3,ASC2,NRC,PRIP,RAP250,TRBP | vertebrata | Homo sapiens               | nuclear receptor coactivator 6 isoform X10 [Homo sapiens]                  | GCF_000001405.39 | TRADDN-NCOA6 |
| XP_016883237.1 | TRADDN-NCOA6 | 1651 | AIB3,ASC2,NRC,PRIP,RAP250,TRBP | vertebrata | Homo sapiens               | nuclear receptor coactivator 6 isoform X13 [Homo sapiens]                  | GCF_000001405.39 | TRADDN-NCOA6 |
| XP_016883238.1 | TRADDN-NCOA6 | 1650 | AIB3,ASC2,NRC,PRIP,RAP250,TRBP | vertebrata | Homo sapiens               | nuclear receptor coactivator 6 isoform X14 [Homo sapiens]                  | GCF_000001405.39 | TRADDN-NCOA6 |
| XP_016883239.1 | TRADDN-NCOA6 | 1094 | AIB3,ASC2,NRC,PRIP,RAP250,TRBP | vertebrata | Homo sapiens               | nuclear receptor coactivator 6 isoform X15 [Homo sapiens]                  | GCF_000001405.39 | TRADDN-NCOA6 |
| XP_005329963.1 | TRADDN-NCOA6 | 2064 | Ncoa6                          | vertebrata | Ictidomys tridecemlineatus | nuclear receptor coactivator 6 isoform X1 [Ictidomys tridecemlineatus]     | GCF_000236235.1  | TRADDN-NCOA6 |
| XP_013215998.1 | TRADDN-NCOA6 | 2063 | Ncoa6                          | vertebrata | Ictidomys tridecemlineatus | nuclear receptor coactivator 6 isoform X2 [Ictidomys tridecemlineatus]     | GCF_000236235.1  | TRADDN-NCOA6 |
| XP_013215999.1 | TRADDN-NCOA6 | 2053 | Ncoa6                          | vertebrata | Ictidomys tridecemlineatus | nuclear receptor coactivator 6 isoform X3 [Ictidomys tridecemlineatus]     | GCF_000236235.1  | TRADDN-NCOA6 |
| XP_021585249.1 | TRADDN-NCOA6 | 2052 | Ncoa6                          | vertebrata | Ictidomys tridecemlineatus | nuclear receptor coactivator 6 isoform X4 [Ictidomys tridecemlineatus]     | GCF_000236235.1  | TRADDN-NCOA6 |
| XP_004668165.1 | TRADDN-NCOA6 | 1972 | Ncoa6                          | vertebrata | Jaculus jaculus            | PREDICTED: nuclear receptor coactivator 6 [Jaculus jaculus]                | GCF_000280705.1  | TRADDN-NCOA6 |
| XP_005986810.1 | TRADDN-NCOA6 | 2049 | NCOA6                          | vertebrata | Latimeria chalumnae        | PREDICTED: nuclear receptor coactivator 6 isoform X1 [Latimeria chalumnae] | GCF_000225785.1  | TRADDN-NCOA6 |
| XP_014342664.1 | TRADDN-NCOA6 | 2007 | NCOA6                          | vertebrata | Latimeria chalumnae        | PREDICTED: nuclear receptor coactivator 6 isoform X2 [Latimeria chalumnae] | GCF_000225785.1  | TRADDN-NCOA6 |

| acc            | architecture | len  | gen.name   | taxend     | species                    | define                                                                         | gca             | clade        |
|----------------|--------------|------|------------|------------|----------------------------|--------------------------------------------------------------------------------|-----------------|--------------|
| XP_014342667.1 | TRADDN-NCOA6 | 2000 | NCOA6      | vertebrata | Latimeria chalumnae        | PREDICTED: nuclear receptor coactivator 6 isoform X3 [Latimeria chalumnae]     | GCF_000225785.1 | TRADDN-NCOA6 |
| XP_017691054.1 | TRADDN-NCOA6 | 2058 | NCOA6      | vertebrata | Lepidothrix coronata       | PREDICTED: nuclear receptor coactivator 6 isoform X1 [Lepidothrix coronata]    | GCF_001604755.1 | TRADDN-NCOA6 |
| XP_017691055.1 | TRADDN-NCOA6 | 2049 | NCOA6      | vertebrata | Lepidothrix coronata       | PREDICTED: nuclear receptor coactivator 6 isoform X2 [Lepidothrix coronata]    | GCF_001604755.1 | TRADDN-NCOA6 |
| XP_017691056.1 | TRADDN-NCOA6 | 1987 | NCOA6      | vertebrata | Lepidothrix coronata       | PREDICTED: nuclear receptor coactivator 6 isoform X3 [Lepidothrix coronata]    | GCF_001604755.1 | TRADDN-NCOA6 |
| XP_017691057.1 | TRADDN-NCOA6 | 1744 | NCOA6      | vertebrata | Lepidothrix coronata       | PREDICTED: nuclear receptor coactivator 6 isoform X4 [Lepidothrix coronata]    | GCF_001604755.1 | TRADDN-NCOA6 |
| XP_006727542.1 | TRADDN-NCOA6 | 2046 | NCOA6      | vertebrata | Leptonychotes weddellii    | PREDICTED: nuclear receptor coactivator 6 isoform X1 [Leptonychotes weddellii] | GCF_000349705.1 | TRADDN-NCOA6 |
| XP_006727543.1 | TRADDN-NCOA6 | 1054 | NCOA6      | vertebrata | Leptonychotes weddellii    | PREDICTED: nuclear receptor coactivator 6 isoform X2 [Leptonychotes weddellii] | -               | TRADDN-NCOA6 |
| KFQ00536.1     | TRADDN-NCOA6 | 170  | N330_11487 | vertebrata | Leptosomus discolor        | Nuclear receptor coactivator 6, partial [Leptosomus discolor]                  | GCA_000691785.1 | TRADDN-NCOA6 |
| PKU40219.1     | TRADDN-NCOA6 | 897  | llap_9474  | vertebrata | Limosa lapponica baueri    | nuclear receptor coactivator 6 [Limosa lapponica baueri]                       | GCA_002844005.1 | TRADDN-NCOA6 |
| XP_007447854.1 | TRADDN-NCOA6 | 2039 | NCOA6      | vertebrata | Lipotes vexillifer         | PREDICTED: nuclear receptor coactivator 6 isoform X1 [Lipotes vexillifer]      | GCF_000442215.1 | TRADDN-NCOA6 |
| XP_007447855.1 | TRADDN-NCOA6 | 1055 | NCOA6      | vertebrata | Lipotes vexillifer         | PREDICTED: nuclear receptor coactivator 6 isoform X2 [Lipotes vexillifer]      | GCF_000442215.1 | TRADDN-NCOA6 |
| OWK53644.1     | TRADDN-NCOA6 | 1817 | NCOA6      | vertebrata | Lonchura striata domestica | Nuclear receptor coactivator 6 [Lonchura striata domestica]                    | GCA_002197715.1 | TRADDN-NCOA6 |
| XP_021392297.1 | TRADDN-NCOA6 | 1047 | NCOA6      | vertebrata | Lonchura striata domestica | nuclear receptor coactivator 6 [Lonchura striata domestica]                    | -               | TRADDN-NCOA6 |
| XP_003411561.2 | TRADDN-NCOA6 | 2070 | NCOA6      | vertebrata | Loxodonta africana         | nuclear receptor coactivator 6 [Loxodonta africana]                            | GCF_000001905.1 | TRADDN-NCOA6 |
| EHH65404.1     | TRADDN-NCOA6 | 2065 | EGM_02156  | vertebrata | Macaca fascicularis        | hypothetical protein EGM_02156 [Macaca fascicularis]                           | GCA_000230815.1 | TRADDN-NCOA6 |
| XP_005568843.1 | TRADDN-NCOA6 | 2065 | NCOA6      | vertebrata | Macaca fascicularis        | PREDICTED: nuclear receptor coactivator 6 isoform X1 [Macaca fascicularis]     | GCF_000364345.1 | TRADDN-NCOA6 |
| XP_005568845.1 | TRADDN-NCOA6 | 1071 | NCOA6      | vertebrata | Macaca fascicularis        | PREDICTED: nuclear receptor coactivator 6 isoform X6 [Macaca fascicularis]     | GCF_000364345.1 | TRADDN-NCOA6 |
| XP_015313448.1 | TRADDN-NCOA6 | 2064 | NCOA6      | vertebrata | Macaca fascicularis        | PREDICTED: nuclear receptor coactivator 6 isoform X2 [Macaca fascicularis]     | GCF_000364345.1 | TRADDN-NCOA6 |
| XP_015313449.1 | TRADDN-NCOA6 | 2054 | NCOA6      | vertebrata | Macaca fascicularis        | PREDICTED: nuclear receptor coactivator 6 isoform X3 [Macaca fascicularis]     | GCF_000364345.1 | TRADDN-NCOA6 |

| acc            | architecture | len  | gen.name  | taxend     | species                | define                                                                     | gca             | clade        |
|----------------|--------------|------|-----------|------------|------------------------|----------------------------------------------------------------------------|-----------------|--------------|
| XP_015313450.1 | TRADDN-NCOA6 | 2053 | NCOA6     | vertebrata | Macaca fascicularis    | PREDICTED: nuclear receptor coactivator 6 isoform X4 [Macaca fascicularis] | GCF_000364345.1 | TRADDN-NCOA6 |
| EHH19760.1     | TRADDN-NCOA6 | 2063 | EGK_02479 | vertebrata | Macaca mulatta         | Amplified in breast cancer protein 3 [Macaca mulatta]                      | GCA_000230795.1 | TRADDN-NCOA6 |
| XP_015004643.1 | TRADDN-NCOA6 | 2065 | NCOA6     | vertebrata | Macaca mulatta         | PREDICTED: nuclear receptor coactivator 6 isoform X1 [Macaca mulatta]      | GCF_003339765.1 | TRADDN-NCOA6 |
| XP_015004644.1 | TRADDN-NCOA6 | 2064 | NCOA6     | vertebrata | Macaca mulatta         | PREDICTED: nuclear receptor coactivator 6 isoform X2 [Macaca mulatta]      | GCF_003339765.1 | TRADDN-NCOA6 |
| XP_015004645.1 | TRADDN-NCOA6 | 2054 | NCOA6     | vertebrata | Macaca mulatta         | PREDICTED: nuclear receptor coactivator 6 isoform X3 [Macaca mulatta]      | GCF_003339765.1 | TRADDN-NCOA6 |
| XP_015004646.1 | TRADDN-NCOA6 | 2053 | NCOA6     | vertebrata | Macaca mulatta         | PREDICTED: nuclear receptor coactivator 6 isoform X4 [Macaca mulatta]      | GCF_003339765.1 | TRADDN-NCOA6 |
| XP_015004650.1 | TRADDN-NCOA6 | 1071 | NCOA6     | vertebrata | Macaca mulatta         | PREDICTED: nuclear receptor coactivator 6 isoform X6 [Macaca mulatta]      | GCF_003339765.1 | TRADDN-NCOA6 |
| XP_011764761.1 | TRADDN-NCOA6 | 2066 | NCOA6     | vertebrata | Macaca nemestrina      | nuclear receptor coactivator 6 isoform X1 [Macaca nemestrina]              | GCF_000956065.1 | TRADDN-NCOA6 |
| XP_011764762.1 | TRADDN-NCOA6 | 2065 | NCOA6     | vertebrata | Macaca nemestrina      | nuclear receptor coactivator 6 isoform X2 [Macaca nemestrina]              | GCF_000956065.1 | TRADDN-NCOA6 |
| XP_011764763.1 | TRADDN-NCOA6 | 2055 | NCOA6     | vertebrata | Macaca nemestrina      | nuclear receptor coactivator 6 isoform X3 [Macaca nemestrina]              | GCF_000956065.1 | TRADDN-NCOA6 |
| XP_011764764.1 | TRADDN-NCOA6 | 2054 | NCOA6     | vertebrata | Macaca nemestrina      | nuclear receptor coactivator 6 isoform X4 [Macaca nemestrina]              | GCF_000956065.1 | TRADDN-NCOA6 |
| XP_011764765.1 | TRADDN-NCOA6 | 1070 | NCOA6     | vertebrata | Macaca nemestrina      | nuclear receptor coactivator 6 isoform X5 [Macaca nemestrina]              | GCF_000956065.1 | TRADDN-NCOA6 |
| XP_017942003.1 | TRADDN-NCOA6 | 2067 | NCOA6     | vertebrata | Manacus vitellinus     | nuclear receptor coactivator 6 isoform X1 [Manacus vitellinus]             | -               | TRADDN-NCOA6 |
| XP_017942004.1 | TRADDN-NCOA6 | 2044 | NCOA6     | vertebrata | Manacus vitellinus     | nuclear receptor coactivator 6 isoform X2 [Manacus vitellinus]             | -               | TRADDN-NCOA6 |
| XP_017942005.1 | TRADDN-NCOA6 | 1982 | NCOA6     | vertebrata | Manacus vitellinus     | nuclear receptor coactivator 6 isoform X3 [Manacus vitellinus]             | -               | TRADDN-NCOA6 |
| XP_017942006.1 | TRADDN-NCOA6 | 1753 | NCOA6     | vertebrata | Manacus vitellinus     | nuclear receptor coactivator 6 isoform X4 [Manacus vitellinus]             | -               | TRADDN-NCOA6 |
| XP_011827816.1 | TRADDN-NCOA6 | 2066 | NCOA6     | vertebrata | Mandrillus leucophaeus | PREDICTED: nuclear receptor coactivator 6 [Mandrillus leucophaeus]         | GCF_000951045.1 | TRADDN-NCOA6 |
| XP_017506268.1 | TRADDN-NCOA6 | 2040 | NCOA6     | vertebrata | Manis javanica         | PREDICTED: nuclear receptor coactivator 6 isoform X1 [Manis javanica]      | GCF_001685135.1 | TRADDN-NCOA6 |
| XP_017506269.1 | TRADDN-NCOA6 | 2039 | NCOA6     | vertebrata | Manis javanica         | PREDICTED: nuclear receptor coactivator 6 isoform X2 [Manis javanica]      | GCF_001685135.1 | TRADDN-NCOA6 |
| XP_017506270.1 | TRADDN-NCOA6 | 2029 | NCOA6     | vertebrata | Manis javanica         | PREDICTED: nuclear receptor coactivator 6 isoform X3 [Manis javanica]      | GCF_001685135.1 | TRADDN-NCOA6 |

| acc            | architecture | len  | gen.name     | taxend     | species                 | define                                                                         | gca             | clade        |
|----------------|--------------|------|--------------|------------|-------------------------|--------------------------------------------------------------------------------|-----------------|--------------|
| XP_017506271.1 | TRADDN-NCOA6 | 2028 | NCOA6        | vertebrata | Manis javanica          | PREDICTED: nuclear receptor coactivator 6 isoform X4 [Manis javanica]          | GCF_001685135.1 | TRADDN-NCOA6 |
| XP_017506272.1 | TRADDN-NCOA6 | 1053 | NCOA6        | vertebrata | Manis javanica          | PREDICTED: nuclear receptor coactivator 6 isoform X5 [Manis javanica]          | GCF_001685135.1 | TRADDN-NCOA6 |
| XP_015336937.1 | TRADDN-NCOA6 | 2058 | Ncoa6        | vertebrata | Marmota marmota marmota | PREDICTED: nuclear receptor coactivator 6 isoform X1 [Marmota marmota marmota] | GCF_001458135.1 | TRADDN-NCOA6 |
| XP_015336944.1 | TRADDN-NCOA6 | 2057 | Ncoa6        | vertebrata | Marmota marmota marmota | PREDICTED: nuclear receptor coactivator 6 isoform X2 [Marmota marmota marmota] | GCF_001458135.1 | TRADDN-NCOA6 |
| XP_015336952.1 | TRADDN-NCOA6 | 2047 | Ncoa6        | vertebrata | Marmota marmota marmota | PREDICTED: nuclear receptor coactivator 6 isoform X3 [Marmota marmota marmota] | GCF_001458135.1 | TRADDN-NCOA6 |
| XP_015336959.1 | TRADDN-NCOA6 | 2046 | Ncoa6        | vertebrata | Marmota marmota marmota | PREDICTED: nuclear receptor coactivator 6 isoform X4 [Marmota marmota marmota] | GCF_001458135.1 | TRADDN-NCOA6 |
| XP_015336968.1 | TRADDN-NCOA6 | 2033 | Ncoa6        | vertebrata | Marmota marmota marmota | PREDICTED: nuclear receptor coactivator 6 isoform X5 [Marmota marmota marmota] | GCF_001458135.1 | TRADDN-NCOA6 |
| XP_015336972.1 | TRADDN-NCOA6 | 1062 | Ncoa6        | vertebrata | Marmota marmota marmota | PREDICTED: nuclear receptor coactivator 6 isoform X6 [Marmota marmota marmota] | GCF_001458135.1 | TRADDN-NCOA6 |
| XP_010720521.1 | TRADDN-NCOA6 | 2042 | NCOA6        | vertebrata | Meleagris gallopavo     | PREDICTED: nuclear receptor coactivator 6 isoform X1 [Meleagris gallopavo]     | GCF_000146605.2 | TRADDN-NCOA6 |
| XP_010720522.1 | TRADDN-NCOA6 | 1980 | NCOA6        | vertebrata | Meleagris gallopavo     | PREDICTED: nuclear receptor coactivator 6 isoform X2 [Meleagris gallopavo]     | GCF_000146605.2 | TRADDN-NCOA6 |
| XP_019477668.1 | TRADDN-NCOA6 | 1770 | NCOA6        | vertebrata | Meleagris gallopavo     | PREDICTED: nuclear receptor coactivator 6 isoform X3 [Meleagris gallopavo]     | GCF_000146605.2 | TRADDN-NCOA6 |
| XP_005146817.1 | TRADDN-NCOA6 | 1046 | LOC101879127 | vertebrata | Melopsittacus undulatus | PREDICTED: nuclear receptor coactivator 6 [Melopsittacus undulatus]            | -               | TRADDN-NCOA6 |
| XP_021496225.1 | TRADDN-NCOA6 | 2073 | Ncoa6        | vertebrata | Meriones unguiculatus   | nuclear receptor coactivator 6 isoform X1 [Meriones unguiculatus]              | GCF_002204375.1 | TRADDN-NCOA6 |
| XP_021496227.1 | TRADDN-NCOA6 | 2072 | Ncoa6        | vertebrata | Meriones unguiculatus   | nuclear receptor coactivator 6 isoform X2 [Meriones unguiculatus]              | GCF_002204375.1 | TRADDN-NCOA6 |
| XP_021496228.1 | TRADDN-NCOA6 | 2062 | Ncoa6        | vertebrata | Meriones unguiculatus   | nuclear receptor coactivator 6 isoform X3 [Meriones unguiculatus]              | GCF_002204375.1 | TRADDN-NCOA6 |
| XP_021496229.1 | TRADDN-NCOA6 | 2061 | Ncoa6        | vertebrata | Meriones unguiculatus   | nuclear receptor coactivator 6 isoform X4 [Meriones unguiculatus]              | GCF_002204375.1 | TRADDN-NCOA6 |
| KFQ18008.1     | TRADDN-NCOA6 | 170  | N331_02691   | vertebrata | Merops nubicus          | Nuclear receptor coactivator 6, partial [Merops nubicus]                       | GCA_000691845.1 | TRADDN-NCOA6 |
| XP_008935730.1 | TRADDN-NCOA6 | 486  | LOC103770229 | vertebrata | Merops nubicus          | PREDICTED: nuclear receptor coactivator 6-like, partial [Merops nubicus]       | GCF_000691845.1 | TRADDN-NCOA6 |
| KFQ26307.1     | TRADDN-NCOA6 | 169  | N332_00124   | vertebrata | Mesitornis unicolor     | Nuclear receptor coactivator 6, partial [Mesitornis unicolor]                  | GCA_000695765.1 | TRADDN-NCOA6 |

| acc            | architecture | len  | gen.name     | taxend     | species                | define                                                                        | gca             | clade        |
|----------------|--------------|------|--------------|------------|------------------------|-------------------------------------------------------------------------------|-----------------|--------------|
| XP_005084691.1 | TRADDN-NCOA6 | 2060 | Ncoa6        | vertebrata | Mesocricetus auratus   | nuclear receptor coactivator 6 isoform X1 [Mesocricetus auratus]              | GCF_000349665.1 | TRADDN-NCOA6 |
| XP_012979529.1 | TRADDN-NCOA6 | 2059 | Ncoa6        | vertebrata | Mesocricetus auratus   | nuclear receptor coactivator 6 isoform X2 [Mesocricetus auratus]              | GCF_000349665.1 | TRADDN-NCOA6 |
| XP_012979530.1 | TRADDN-NCOA6 | 2049 | Ncoa6        | vertebrata | Mesocricetus auratus   | nuclear receptor coactivator 6 isoform X3 [Mesocricetus auratus]              | GCF_000349665.1 | TRADDN-NCOA6 |
| XP_012979531.1 | TRADDN-NCOA6 | 2048 | Ncoa6        | vertebrata | Mesocricetus auratus   | nuclear receptor coactivator 6 isoform X4 [Mesocricetus auratus]              | GCF_000349665.1 | TRADDN-NCOA6 |
| XP_021091327.1 | TRADDN-NCOA6 | 1064 | Ncoa6        | vertebrata | Mesocricetus auratus   | nuclear receptor coactivator 6 isoform X5 [Mesocricetus auratus]              | GCF_000349665.1 | TRADDN-NCOA6 |
| XP_012610105.1 | TRADDN-NCOA6 | 2048 | NCOA6        | vertebrata | Microcebus murinus     | nuclear receptor coactivator 6 isoform X1 [Microcebus murinus]                | GCF_000165445.2 | TRADDN-NCOA6 |
| XP_012610107.1 | TRADDN-NCOA6 | 2047 | NCOA6        | vertebrata | Microcebus murinus     | nuclear receptor coactivator 6 isoform X2 [Microcebus murinus]                | GCF_000165445.2 | TRADDN-NCOA6 |
| XP_012610108.1 | TRADDN-NCOA6 | 2037 | NCOA6        | vertebrata | Microcebus murinus     | nuclear receptor coactivator 6 isoform X3 [Microcebus murinus]                | GCF_000165445.2 | TRADDN-NCOA6 |
| XP_012610109.1 | TRADDN-NCOA6 | 2036 | NCOA6        | vertebrata | Microcebus murinus     | nuclear receptor coactivator 6 isoform X4 [Microcebus murinus]                | GCF_000165445.2 | TRADDN-NCOA6 |
| XP_012610112.1 | TRADDN-NCOA6 | 1060 | NCOA6        | vertebrata | Microcebus murinus     | nuclear receptor coactivator 6 isoform X5 [Microcebus murinus]                | GCF_000165445.2 | TRADDN-NCOA6 |
| XP_005363137.1 | TRADDN-NCOA6 | 2063 | Ncoa6        | vertebrata | Microtus ochrogaster   | nuclear receptor coactivator 6 isoform X1 [Microtus ochrogaster]              | GCF_000317375.1 | TRADDN-NCOA6 |
| XP_013207639.1 | TRADDN-NCOA6 | 2062 | Ncoa6        | vertebrata | Microtus ochrogaster   | nuclear receptor coactivator 6 isoform X2 [Microtus ochrogaster]              | GCF_000317375.1 | TRADDN-NCOA6 |
| XP_016068639.1 | TRADDN-NCOA6 | 2057 | NCOA6        | vertebrata | Miniopterus natalensis | PREDICTED: nuclear receptor coactivator 6 isoform X1 [Miniopterus natalensis] | GCF_001595765.1 | TRADDN-NCOA6 |
| XP_016068640.1 | TRADDN-NCOA6 | 2056 | NCOA6        | vertebrata | Miniopterus natalensis | PREDICTED: nuclear receptor coactivator 6 isoform X2 [Miniopterus natalensis] | GCF_001595765.1 | TRADDN-NCOA6 |
| XP_001371478.2 | TRADDN-NCOA6 | 2054 | NCOA6        | vertebrata | Monodelphis domestica  | PREDICTED: nuclear receptor coactivator 6 isoform X1 [Monodelphis domestica]  | GCF_000002295.2 | TRADDN-NCOA6 |
| XP_007474291.1 | TRADDN-NCOA6 | 2031 | NCOA6        | vertebrata | Monodelphis domestica  | PREDICTED: nuclear receptor coactivator 6 isoform X2 [Monodelphis domestica]  | GCF_000002295.2 | TRADDN-NCOA6 |
| XP_007474292.1 | TRADDN-NCOA6 | 1620 | NCOA6        | vertebrata | Monodelphis domestica  | PREDICTED: nuclear receptor coactivator 6 isoform X3 [Monodelphis domestica]  | GCF_000002295.2 | TRADDN-NCOA6 |
| XP_007474293.1 | TRADDN-NCOA6 | 1053 | NCOA6        | vertebrata | Monodelphis domestica  | PREDICTED: nuclear receptor coactivator 6 isoform X4 [Monodelphis domestica]  | GCF_000002295.2 | TRADDN-NCOA6 |
| XP_021010953.1 | TRADDN-NCOA6 | 1069 | LOC110289096 | vertebrata | Mus caroli             | LOW QUALITY PROTEIN: nuclear receptor coactivator 6-like [Mus caroli]         | GCF_900094665.1 | TRADDN-NCOA6 |
| XP_021012014.1 | TRADDN-NCOA6 | 2069 | Ncoa6        | vertebrata | Mus caroli             | nuclear receptor coactivator 6 isoform X1 [Mus caroli]                        | -               | TRADDN-NCOA6 |
| XP_021012016.1 | TRADDN-NCOA6 | 2058 | Ncoa6        | vertebrata | Mus caroli             | nuclear receptor coactivator 6 isoform X2 [Mus caroli]                        | GCF_900094665.1 | TRADDN-NCOA6 |
| XP_021012017.1 | TRADDN-NCOA6 | 2057 | Ncoa6        | vertebrata | Mus caroli             | nuclear receptor coactivator 6 isoform X3 [Mus caroli]                        | GCF_900094665.1 | TRADDN-NCOA6 |

| acc            | architecture | len  | gen.name                                        | taxend     | species               | define                                                                                                                                                                                                                                                                                                                                                                                                                                                                                                                          | gca              | clade        |
|----------------|--------------|------|-------------------------------------------------|------------|-----------------------|---------------------------------------------------------------------------------------------------------------------------------------------------------------------------------------------------------------------------------------------------------------------------------------------------------------------------------------------------------------------------------------------------------------------------------------------------------------------------------------------------------------------------------|------------------|--------------|
| XP_021012018.1 | TRADDN-NCOA6 | 1075 | Ncoa6                                           | vertebrata | Mus caroli            | nuclear receptor coactivator 6 isoform X4 [Mus caroli]                                                                                                                                                                                                                                                                                                                                                                                                                                                                          | GCF_900094665.1  | TRADDN-NCOA6 |
| AAH31113.1     | TRADDN-NCOA6 | 458  | AIB3                                            | vertebrata | Mus musculus          | Ncoa6 protein [Mus musculus]                                                                                                                                                                                                                                                                                                                                                                                                                                                                                                    | -                | TRADDN-NCOA6 |
| AEG79562.1     | TRADDN-NCOA6 | 1973 | Ncoa6                                           | vertebrata | Mus musculus          | nuclear receptor coactivator-6 gamma [Mus musculus]                                                                                                                                                                                                                                                                                                                                                                                                                                                                             | -                | TRADDN-NCOA6 |
| AEG79563.1     | TRADDN-NCOA6 | 981  | Ncoa6                                           | vertebrata | Mus musculus          | nuclear receptor coactivator-6 delta [Mus musculus]                                                                                                                                                                                                                                                                                                                                                                                                                                                                             | -                | TRADDN-NCOA6 |
| BAE42705.1     | TRADDN-NCOA6 | 1516 | -                                               | vertebrata | Mus musculus          | unnamed protein product, partial [Mus musculus]                                                                                                                                                                                                                                                                                                                                                                                                                                                                                 | -                | TRADDN-NCOA6 |
| NP_001229487.1 | TRADDN-NCOA6 | 1077 | AIB3,ASC-2,ASC2,mKIAA0181,Ncoa7,NRC,PRIP,RAP250 | vertebrata | Mus musculus          | nuclear receptor coactivator 6 isoform 2 [Mus musculus]                                                                                                                                                                                                                                                                                                                                                                                                                                                                         | GCF_000001635.26 | TRADDN-NCOA6 |
| NP_062799.2    | TRADDN-NCOA6 | 2069 | AIB3,ASC-2,ASC2,mKIAA0181,Ncoa7,NRC,PRIP,RAP250 | vertebrata | Mus musculus          | nuclear receptor coactivator 6 isoform 1 [Mus musculus]                                                                                                                                                                                                                                                                                                                                                                                                                                                                         | GCF_000001635.26 | TRADDN-NCOA6 |
| Q9JL19.1       | TRADDN-NCOA6 | 2067 | -                                               | vertebrata | Mus musculus          | RecName: Full=Nuclear receptor coactivator 6; AltName: Full=Activating signal cointegrator 2; Short=ASC-2; AltName: Full=Amplified in breast cancer protein 3; AltName: Full=Cancer-amplified transcriptional coactivator ASC-2; AltName: Full=Nuclear receptor coactivator RAP250; Short=NRC; AltName: Full=Nuclear receptor-activating protein, 250 kDa; AltName: Full=Peroxisome proliferator-activated receptor-interacting protein; Short=PPAR-interacting protein; AltName: Full=Thyroid hormone receptor-binding protein | -                | TRADDN-NCOA6 |
| XP_021049610.1 | TRADDN-NCOA6 | 2070 | Ncoa6                                           | vertebrata | Mus pahari            | nuclear receptor coactivator 6 isoform X1 [Mus pahari]                                                                                                                                                                                                                                                                                                                                                                                                                                                                          | GCF_900095145.1  | TRADDN-NCOA6 |
| XP_021049611.1 | TRADDN-NCOA6 | 1974 | Ncoa6                                           | vertebrata | Mus pahari            | nuclear receptor coactivator 6 isoform X2 [Mus pahari]                                                                                                                                                                                                                                                                                                                                                                                                                                                                          | -                | TRADDN-NCOA6 |
| XP_021049612.1 | TRADDN-NCOA6 | 1072 | Ncoa6                                           | vertebrata | Mus pahari            | nuclear receptor coactivator 6 isoform X3 [Mus pahari]                                                                                                                                                                                                                                                                                                                                                                                                                                                                          | GCF_900095145.1  | TRADDN-NCOA6 |
| XP_004746634.1 | TRADDN-NCOA6 | 2066 | NCOA6                                           | vertebrata | Mustela putorius furo | PREDICTED: nuclear receptor coactivator 6 isoform X1 [Mustela putorius furo]                                                                                                                                                                                                                                                                                                                                                                                                                                                    | GCF_000215625.1  | TRADDN-NCOA6 |
| XP_004746637.1 | TRADDN-NCOA6 | 2065 | NCOA6                                           | vertebrata | Mustela putorius furo | PREDICTED: nuclear receptor coactivator 6 isoform X2 [Mustela putorius furo]                                                                                                                                                                                                                                                                                                                                                                                                                                                    | GCF_000215625.1  | TRADDN-NCOA6 |
| XP_004746638.1 | TRADDN-NCOA6 | 2055 | NCOA6                                           | vertebrata | Mustela putorius furo | PREDICTED: nuclear receptor coactivator 6 isoform X3 [Mustela putorius furo]                                                                                                                                                                                                                                                                                                                                                                                                                                                    | GCF_000215625.1  | TRADDN-NCOA6 |
| XP_004746639.1 | TRADDN-NCOA6 | 2054 | NCOA6                                           | vertebrata | Mustela putorius furo | PREDICTED: nuclear receptor coactivator 6 isoform X4 [Mustela putorius furo]                                                                                                                                                                                                                                                                                                                                                                                                                                                    | GCF_000215625.1  | TRADDN-NCOA6 |
| XP_004746640.1 | TRADDN-NCOA6 | 1966 | NCOA6                                           | vertebrata | Mustela putorius furo | PREDICTED: nuclear receptor coactivator 6 isoform X5 [Mustela putorius furo]                                                                                                                                                                                                                                                                                                                                                                                                                                                    | GCF_000215625.1  | TRADDN-NCOA6 |

| acc            | architecture | len  | gen.name          | taxend     | species          | define                                                                 | gca             | clade        |
|----------------|--------------|------|-------------------|------------|------------------|------------------------------------------------------------------------|-----------------|--------------|
| EPQ16132.1     | TRADDN-NCOA6 | 1797 | D623_10023707     | vertebrata | Myotis brandtii  | Nuclear receptor coactivator 6 [Myotis brandtii]                       | GCA_000412655.1 | TRADDN-NCOA6 |
| XP_005879842.1 | TRADDN-NCOA6 | 2060 | NCOA6             | vertebrata | Myotis brandtii  | PREDICTED: nuclear receptor coactivator 6 isoform X1 [Myotis brandtii] | GCF_000412655.1 | TRADDN-NCOA6 |
| XP_005879843.1 | TRADDN-NCOA6 | 2059 | NCOA6             | vertebrata | Myotis brandtii  | PREDICTED: nuclear receptor coactivator 6 isoform X2 [Myotis brandtii] | GCF_000412655.1 | TRADDN-NCOA6 |
| XP_005879844.1 | TRADDN-NCOA6 | 2049 | NCOA6             | vertebrata | Myotis brandtii  | PREDICTED: nuclear receptor coactivator 6 isoform X3 [Myotis brandtii] | GCF_000412655.1 | TRADDN-NCOA6 |
| XP_005879845.1 | TRADDN-NCOA6 | 2048 | NCOA6             | vertebrata | Myotis brandtii  | PREDICTED: nuclear receptor coactivator 6 isoform X4 [Myotis brandtii] | GCF_000412655.1 | TRADDN-NCOA6 |
| XP_005879846.1 | TRADDN-NCOA6 | 2004 | NCOA6             | vertebrata | Myotis brandtii  | PREDICTED: nuclear receptor coactivator 6 isoform X5 [Myotis brandtii] | GCF_000412655.1 | TRADDN-NCOA6 |
| XP_014406139.1 | TRADDN-NCOA6 | 1064 | NCOA6             | vertebrata | Myotis brandtii  | PREDICTED: nuclear receptor coactivator 6 isoform X6 [Myotis brandtii] | GCF_000412655.1 | TRADDN-NCOA6 |
| ELK29648.1     | TRADDN-NCOA6 | 2029 | MDA_GLEAN10022763 | vertebrata | Myotis davidii   | Nuclear receptor coactivator 6 [Myotis davidii]                        | GCA_000327345.1 | TRADDN-NCOA6 |
| XP_006764639.1 | TRADDN-NCOA6 | 2062 | NCOA6             | vertebrata | Myotis davidii   | PREDICTED: nuclear receptor coactivator 6 isoform X1 [Myotis davidii]  | GCF_000327345.1 | TRADDN-NCOA6 |
| XP_006764640.1 | TRADDN-NCOA6 | 2061 | NCOA6             | vertebrata | Myotis davidii   | PREDICTED: nuclear receptor coactivator 6 isoform X2 [Myotis davidii]  | GCF_000327345.1 | TRADDN-NCOA6 |
| XP_006764641.1 | TRADDN-NCOA6 | 2006 | NCOA6             | vertebrata | Myotis davidii   | PREDICTED: nuclear receptor coactivator 6 isoform X5 [Myotis davidii]  | GCF_000327345.1 | TRADDN-NCOA6 |
| XP_015419968.1 | TRADDN-NCOA6 | 2051 | NCOA6             | vertebrata | Myotis davidii   | PREDICTED: nuclear receptor coactivator 6 isoform X3 [Myotis davidii]  | GCF_000327345.1 | TRADDN-NCOA6 |
| XP_015419969.1 | TRADDN-NCOA6 | 2050 | NCOA6             | vertebrata | Myotis davidii   | PREDICTED: nuclear receptor coactivator 6 isoform X4 [Myotis davidii]  | GCF_000327345.1 | TRADDN-NCOA6 |
| XP_015419970.1 | TRADDN-NCOA6 | 1064 | NCOA6             | vertebrata | Myotis davidii   | PREDICTED: nuclear receptor coactivator 6 isoform X6 [Myotis davidii]  | GCF_000327345.1 | TRADDN-NCOA6 |
| XP_023610171.1 | TRADDN-NCOA6 | 2061 | NCOA6             | vertebrata | Myotis lucifugus | nuclear receptor coactivator 6 isoform X1 [Myotis lucifugus]           | GCF_000147115.1 | TRADDN-NCOA6 |
| XP_023610172.1 | TRADDN-NCOA6 | 2060 | NCOA6             | vertebrata | Myotis lucifugus | nuclear receptor coactivator 6 isoform X2 [Myotis lucifugus]           | GCF_000147115.1 | TRADDN-NCOA6 |
| XP_023610174.1 | TRADDN-NCOA6 | 2050 | NCOA6             | vertebrata | Myotis lucifugus | nuclear receptor coactivator 6 isoform X3 [Myotis lucifugus]           | GCF_000147115.1 | TRADDN-NCOA6 |
| XP_023610175.1 | TRADDN-NCOA6 | 2049 | NCOA6             | vertebrata | Myotis lucifugus | nuclear receptor coactivator 6 isoform X4 [Myotis lucifugus]           | GCF_000147115.1 | TRADDN-NCOA6 |
| XP_023610176.1 | TRADDN-NCOA6 | 2038 | NCOA6             | vertebrata | Myotis lucifugus | nuclear receptor coactivator 6 isoform X5 [Myotis lucifugus]           | GCF_000147115.1 | TRADDN-NCOA6 |
| XP_023610177.1 | TRADDN-NCOA6 | 2037 | NCOA6             | vertebrata | Myotis lucifugus | nuclear receptor coactivator 6 isoform X6 [Myotis lucifugus]           | GCF_000147115.1 | TRADDN-NCOA6 |



| acc            | architecture | len  | gen.name    | taxend     | species                     | define                                                                           | gca             | clade        |
|----------------|--------------|------|-------------|------------|-----------------------------|----------------------------------------------------------------------------------|-----------------|--------------|
| XP_008846104.1 | TRADDN-NCOA6 | 2049 | Ncoa6       | vertebrata | Nannospalax galili          | PREDICTED: nuclear receptor coactivator 6 isoform X2 [Nannospalax galili]        | GCF_000622305.1 | TRADDN-NCOA6 |
| XP_008846105.1 | TRADDN-NCOA6 | 1069 | Ncoa6       | vertebrata | Nannospalax galili          | PREDICTED: nuclear receptor coactivator 6 isoform X5 [Nannospalax galili]        | GCF_000622305.1 | TRADDN-NCOA6 |
| XP_017657374.1 | TRADDN-NCOA6 | 2060 | Ncoa6       | vertebrata | Nannospalax galili          | PREDICTED: nuclear receptor coactivator 6 isoform X1 [Nannospalax galili]        | GCF_000622305.1 | TRADDN-NCOA6 |
| XP_017657375.1 | TRADDN-NCOA6 | 2040 | Ncoa6       | vertebrata | Nannospalax galili          | PREDICTED: nuclear receptor coactivator 6 isoform X3 [Nannospalax galili]        | GCF_000622305.1 | TRADDN-NCOA6 |
| XP_017657376.1 | TRADDN-NCOA6 | 2019 | Ncoa6       | vertebrata | Nannospalax galili          | PREDICTED: nuclear receptor coactivator 6 isoform X4 [Nannospalax galili]        | -               | TRADDN-NCOA6 |
| XP_018411685.1 | TRADDN-NCOA6 | 1917 | NCOA6       | vertebrata | Nanorana parkeri            | PREDICTED: nuclear receptor coactivator 6 [Nanorana parkeri]                     | GCF_000935625.1 | TRADDN-NCOA6 |
| XP_021544696.1 | TRADDN-NCOA6 | 2053 | NCOA6       | vertebrata | Neomonachus schauinslandi   | nuclear receptor coactivator 6 isoform X1 [Neomonachus schauinslandi]            | GCF_002201575.1 | TRADDN-NCOA6 |
| XP_021544698.1 | TRADDN-NCOA6 | 2042 | NCOA6       | vertebrata | Neomonachus schauinslandi   | nuclear receptor coactivator 6 isoform X2 [Neomonachus schauinslandi]            | GCF_002201575.1 | TRADDN-NCOA6 |
| XP_024598703.1 | TRADDN-NCOA6 | 2039 | NCOA6       | vertebrata | Neophocaena asiaeorientalis | nuclear receptor coactivator 6 isoform X1 [Neophocaena asiaeorientalis]          | GCF_003031525.1 | TRADDN-NCOA6 |
| XP_024598704.1 | TRADDN-NCOA6 | 2038 | NCOA6       | vertebrata | Neophocaena asiaeorientalis | nuclear receptor coactivator 6 isoform X2 [Neophocaena asiaeorientalis]          | GCF_003031525.1 | TRADDN-NCOA6 |
| XP_024598705.1 | TRADDN-NCOA6 | 2028 | NCOA6       | vertebrata | Neophocaena asiaeorientalis | nuclear receptor coactivator 6 isoform X3 [Neophocaena asiaeorientalis]          | GCF_003031525.1 | TRADDN-NCOA6 |
| XP_024598707.1 | TRADDN-NCOA6 | 2027 | NCOA6       | vertebrata | Neophocaena asiaeorientalis | nuclear receptor coactivator 6 isoform X4 [Neophocaena asiaeorientalis]          | GCF_003031525.1 | TRADDN-NCOA6 |
| XP_024598709.1 | TRADDN-NCOA6 | 1714 | NCOA6       | vertebrata | Neophocaena asiaeorientalis | nuclear receptor coactivator 6 isoform X6 [Neophocaena asiaeorientalis]          | GCF_003031525.1 | TRADDN-NCOA6 |
| OBS65359.1     | TRADDN-NCOA6 | 1980 | A6R68_06076 | vertebrata | Neotoma lepida              | hypothetical protein A6R68_06076, partial [Neotoma lepida]                       | GCA_001675575.1 | TRADDN-NCOA6 |
| XP_010018687.1 | TRADDN-NCOA6 | 1052 | NCOA6       | vertebrata | Nestor notabilis            | PREDICTED: nuclear receptor coactivator 6 [Nestor notabilis]                     | GCF_000696875.1 | TRADDN-NCOA6 |
| KFR06714.1     | TRADDN-NCOA6 | 2045 | Y956_05669  | vertebrata | Nipponia nippon             | Nuclear receptor coactivator 6 [Nipponia nippon]                                 | GCA_000708225.1 | TRADDN-NCOA6 |
| XP_009471645.1 | TRADDN-NCOA6 | 1056 | NCOA6       | vertebrata | Nipponia nippon             | PREDICTED: LOW QUALITY PROTEIN: nuclear receptor coactivator 6 [Nipponia nippon] | GCF_000708225.1 | TRADDN-NCOA6 |
| XP_004090170.1 | TRADDN-NCOA6 | 1080 | NCOA6       | vertebrata | Nomascus leucogenys         | PREDICTED: nuclear receptor coactivator 6 isoform X2 [Nomascus leucogenys]       | -               | TRADDN-NCOA6 |

| acc            | architecture | len  | gen.name     | taxend     | species                        | define                                                                             | gca             | clade        |
|----------------|--------------|------|--------------|------------|--------------------------------|------------------------------------------------------------------------------------|-----------------|--------------|
| XP_012367438.1 | TRADDN-NCOA6 | 2074 | NCOA6        | vertebrata | Nomascus leucogenys            | PREDICTED: nuclear receptor coactivator 6 isoform X1 [Nomascus leucogenys]         | GCF_006542625.1 | TRADDN-NCOA6 |
| XP_021272769.1 | TRADDN-NCOA6 | 2045 | NCOA6        | vertebrata | Numida meleagris               | nuclear receptor coactivator 6 isoform X1 [Numida meleagris]                       | GCF_002078875.1 | TRADDN-NCOA6 |
| XP_021272770.1 | TRADDN-NCOA6 | 1983 | NCOA6        | vertebrata | Numida meleagris               | nuclear receptor coactivator 6 isoform X2 [Numida meleagris]                       | GCF_002078875.1 | TRADDN-NCOA6 |
| XP_004585801.1 | TRADDN-NCOA6 | 2065 | NCOA6        | vertebrata | Ochotona princeps              | PREDICTED: nuclear receptor coactivator 6 isoform X1 [Ochotona princeps]           | GCF_000292845.1 | TRADDN-NCOA6 |
| XP_004585802.1 | TRADDN-NCOA6 | 1061 | NCOA6        | vertebrata | Ochotona princeps              | PREDICTED: nuclear receptor coactivator 6 isoform X2 [Ochotona princeps]           | GCF_000292845.1 | TRADDN-NCOA6 |
| XP_023570540.1 | TRADDN-NCOA6 | 2069 | Ncoa6        | vertebrata | Octodon degus                  | nuclear receptor coactivator 6 isoform X1 [Octodon degus]                          | GCF_000260255.1 | TRADDN-NCOA6 |
| XP_023570543.1 | TRADDN-NCOA6 | 2058 | Ncoa6        | vertebrata | Octodon degus                  | nuclear receptor coactivator 6 isoform X2 [Octodon degus]                          | GCF_000260255.1 | TRADDN-NCOA6 |
| XP_023570544.1 | TRADDN-NCOA6 | 2057 | Ncoa6        | vertebrata | Octodon degus                  | nuclear receptor coactivator 6 isoform X3 [Octodon degus]                          | GCF_000260255.1 | TRADDN-NCOA6 |
| XP_023570545.1 | TRADDN-NCOA6 | 1838 | Ncoa6        | vertebrata | Octodon degus                  | nuclear receptor coactivator 6 isoform X4 [Octodon degus]                          | GCF_000260255.1 | TRADDN-NCOA6 |
| XP_023570546.1 | TRADDN-NCOA6 | 1075 | Ncoa6        | vertebrata | Octodon degus                  | nuclear receptor coactivator 6 isoform X5 [Octodon degus]                          | GCF_000260255.1 | TRADDN-NCOA6 |
| XP_012420658.1 | TRADDN-NCOA6 | 2053 | NCOA6        | vertebrata | Odobenus rosmarus divergens    | PREDICTED: nuclear receptor coactivator 6 isoform X1 [Odobenus rosmarus divergens] | GCF_000321225.1 | TRADDN-NCOA6 |
| XP_012420661.1 | TRADDN-NCOA6 | 1060 | NCOA6        | vertebrata | Odobenus rosmarus divergens    | PREDICTED: nuclear receptor coactivator 6 isoform X2 [Odobenus rosmarus divergens] | GCF_000321225.1 | TRADDN-NCOA6 |
| XP_020744807.1 | TRADDN-NCOA6 | 1895 | LOC110134568 | vertebrata | Odocoileus virginianus texanus | nuclear receptor coactivator 6 isoform X1 [Odocoileus virginianus texanus]         | GCF_002102435.1 | TRADDN-NCOA6 |
| XP_020744808.1 | TRADDN-NCOA6 | 1894 | LOC110134568 | vertebrata | Odocoileus virginianus texanus | nuclear receptor coactivator 6 isoform X2 [Odocoileus virginianus texanus]         | GCF_002102435.1 | TRADDN-NCOA6 |
| XP_020744809.1 | TRADDN-NCOA6 | 1884 | LOC110134568 | vertebrata | Odocoileus virginianus texanus | nuclear receptor coactivator 6 isoform X3 [Odocoileus virginianus texanus]         | GCF_002102435.1 | TRADDN-NCOA6 |
| XP_020744810.1 | TRADDN-NCOA6 | 1883 | LOC110134568 | vertebrata | Odocoileus virginianus texanus | nuclear receptor coactivator 6 isoform X4 [Odocoileus virginianus texanus]         | GCF_002102435.1 | TRADDN-NCOA6 |
| XP_020744812.1 | TRADDN-NCOA6 | 1795 | LOC110134568 | vertebrata | Odocoileus virginianus texanus | nuclear receptor coactivator 6 isoform X6 [Odocoileus virginianus texanus]         | GCF_002102435.1 | TRADDN-NCOA6 |
| XP_020749657.1 | TRADDN-NCOA6 | 143  | LOC110137564 | vertebrata | Odocoileus virginianus texanus | nuclear receptor coactivator 6-like [Odocoileus virginianus texanus]               | GCF_002102435.1 | TRADDN-NCOA6 |
| XP_009942846.1 | TRADDN-NCOA6 | 1048 | NCOA6        | vertebrata | Opisthocomus hoazin            | PREDICTED: nuclear receptor coactivator 6 [Opisthocomus hoazin]                    | GCF_000692075.1 | TRADDN-NCOA6 |
| XP_004272797.1 | TRADDN-NCOA6 | 2041 | NCOA6        | vertebrata | Orcinus orca                   | PREDICTED: nuclear receptor coactivator 6 isoform X1 [Orcinus orca]                | GCF_000331955.2 | TRADDN-NCOA6 |

| acc            | architecture | len  | gen.name     | taxend     | species                  | define                                                                       | gca             | clade        |
|----------------|--------------|------|--------------|------------|--------------------------|------------------------------------------------------------------------------|-----------------|--------------|
| XP_004272798.1 | TRADDN-NCOA6 | 1057 | NCOA6        | vertebrata | Orcinus orca             | PREDICTED: nuclear receptor coactivator 6 isoform X2 [Orcinus orca]          | GCF_000331955.2 | TRADDN-NCOA6 |
| XP_007655684.1 | TRADDN-NCOA6 | 753  | LOC100092044 | vertebrata | Ornithorhynchus anatinus | PREDICTED: nuclear receptor coactivator 6-like [Ornithorhynchus anatinus]    | -               | TRADDN-NCOA6 |
| XP_007932923.1 | TRADDN-NCOA6 | 2109 | NCOA6        | vertebrata | Orycteropus afer afer    | PREDICTED: nuclear receptor coactivator 6 [Orycteropus afer afer]            | GCF_000298275.1 | TRADDN-NCOA6 |
| XP_008254292.1 | TRADDN-NCOA6 | 2074 | NCOA6        | vertebrata | Oryctolagus cuniculus    | PREDICTED: nuclear receptor coactivator 6 isoform X1 [Oryctolagus cuniculus] | GCF_000003625.3 | TRADDN-NCOA6 |
| XP_008254293.1 | TRADDN-NCOA6 | 2073 | NCOA6        | vertebrata | Oryctolagus cuniculus    | PREDICTED: nuclear receptor coactivator 6 isoform X2 [Oryctolagus cuniculus] | GCF_000003625.3 | TRADDN-NCOA6 |
| XP_008254295.1 | TRADDN-NCOA6 | 2063 | NCOA6        | vertebrata | Oryctolagus cuniculus    | PREDICTED: nuclear receptor coactivator 6 isoform X3 [Oryctolagus cuniculus] | GCF_000003625.3 | TRADDN-NCOA6 |
| XP_008254296.1 | TRADDN-NCOA6 | 2062 | NCOA6        | vertebrata | Oryctolagus cuniculus    | PREDICTED: nuclear receptor coactivator 6 isoform X4 [Oryctolagus cuniculus] | GCF_000003625.3 | TRADDN-NCOA6 |
| XP_008254298.1 | TRADDN-NCOA6 | 2050 | NCOA6        | vertebrata | Oryctolagus cuniculus    | PREDICTED: nuclear receptor coactivator 6 isoform X6 [Oryctolagus cuniculus] | GCF_000003625.3 | TRADDN-NCOA6 |
| XP_008254300.1 | TRADDN-NCOA6 | 1631 | NCOA6        | vertebrata | Oryctolagus cuniculus    | PREDICTED: nuclear receptor coactivator 6 isoform X8 [Oryctolagus cuniculus] | GCF_000003625.3 | TRADDN-NCOA6 |
| XP_017197155.1 | TRADDN-NCOA6 | 2051 | NCOA6        | vertebrata | Oryctolagus cuniculus    | PREDICTED: nuclear receptor coactivator 6 isoform X5 [Oryctolagus cuniculus] | GCF_000003625.3 | TRADDN-NCOA6 |
| XP_017197156.1 | TRADDN-NCOA6 | 1982 | NCOA6        | vertebrata | Oryctolagus cuniculus    | PREDICTED: nuclear receptor coactivator 6 isoform X7 [Oryctolagus cuniculus] | GCF_000003625.3 | TRADDN-NCOA6 |
| XP_017197157.1 | TRADDN-NCOA6 | 1067 | NCOA6        | vertebrata | Oryctolagus cuniculus    | PREDICTED: nuclear receptor coactivator 6 isoform X9 [Oryctolagus cuniculus] | GCF_000003625.3 | TRADDN-NCOA6 |
| XP_012659617.1 | TRADDN-NCOA6 | 2054 | NCOA6        | vertebrata | Otolemur garnettii       | nuclear receptor coactivator 6 isoform X1 [Otolemur garnettii]               | GCF_000181295.1 | TRADDN-NCOA6 |
| XP_023367932.1 | TRADDN-NCOA6 | 2053 | NCOA6        | vertebrata | Otolemur garnettii       | nuclear receptor coactivator 6 isoform X2 [Otolemur garnettii]               | GCF_000181295.1 | TRADDN-NCOA6 |
| XP_023367933.1 | TRADDN-NCOA6 | 1954 | NCOA6        | vertebrata | Otolemur garnettii       | nuclear receptor coactivator 6 isoform X3 [Otolemur garnettii]               | GCF_000181295.1 | TRADDN-NCOA6 |
| XP_014955323.1 | TRADDN-NCOA6 | 2043 | NCOA6        | vertebrata | Ovis aries               | PREDICTED: nuclear receptor coactivator 6 isoform X1 [Ovis aries]            | -               | TRADDN-NCOA6 |
| XP_014955325.1 | TRADDN-NCOA6 | 2032 | NCOA6        | vertebrata | Ovis aries               | PREDICTED: nuclear receptor coactivator 6 isoform X2 [Ovis aries]            | -               | TRADDN-NCOA6 |
| XP_014955326.1 | TRADDN-NCOA6 | 2031 | NCOA6        | vertebrata | Ovis aries               | PREDICTED: nuclear receptor coactivator 6 isoform X3 [Ovis aries]            | -               | TRADDN-NCOA6 |
| XP_011970304.1 | TRADDN-NCOA6 | 2046 | NCOA6        | vertebrata | Ovis aries musimon       | PREDICTED: nuclear receptor coactivator 6 isoform X1 [Ovis aries musimon]    | -               | TRADDN-NCOA6 |

| acc            | architecture | len  | gen.name       | taxend     | species                 | define                                                                         | gca             | clade        |
|----------------|--------------|------|----------------|------------|-------------------------|--------------------------------------------------------------------------------|-----------------|--------------|
| XP_014946800.1 | TRADDN-NCOA6 | 2035 | NCOA6          | vertebrata | Ovis aries musimon      | PREDICTED: nuclear receptor coactivator 6 isoform X2 [Ovis aries musimon]      | -               | TRADDN-NCOA6 |
| XP_014946801.1 | TRADDN-NCOA6 | 2034 | NCOA6          | vertebrata | Ovis aries musimon      | PREDICTED: nuclear receptor coactivator 6 isoform X3 [Ovis aries musimon]      | -               | TRADDN-NCOA6 |
| XP_014946805.1 | TRADDN-NCOA6 | 1061 | NCOA6          | vertebrata | Ovis aries musimon      | PREDICTED: nuclear receptor coactivator 6 isoform X5 [Ovis aries musimon]      | -               | TRADDN-NCOA6 |
| XP_008955456.1 | TRADDN-NCOA6 | 2070 | NCOA6          | vertebrata | Pan paniscus            | nuclear receptor coactivator 6 isoform X1 [Pan paniscus]                       | GCF_000258655.2 | TRADDN-NCOA6 |
| XP_008955458.1 | TRADDN-NCOA6 | 2069 | NCOA6          | vertebrata | Pan paniscus            | nuclear receptor coactivator 6 isoform X2 [Pan paniscus]                       | GCF_000258655.2 | TRADDN-NCOA6 |
| XP_008955459.1 | TRADDN-NCOA6 | 2059 | NCOA6          | vertebrata | Pan paniscus            | nuclear receptor coactivator 6 isoform X3 [Pan paniscus]                       | GCF_000258655.2 | TRADDN-NCOA6 |
| XP_008955460.1 | TRADDN-NCOA6 | 2058 | NCOA6          | vertebrata | Pan paniscus            | nuclear receptor coactivator 6 isoform X4 [Pan paniscus]                       | GCF_000258655.2 | TRADDN-NCOA6 |
| XP_008955461.1 | TRADDN-NCOA6 | 1077 | NCOA6          | vertebrata | Pan paniscus            | nuclear receptor coactivator 6 isoform X6 [Pan paniscus]                       | GCF_000258655.2 | TRADDN-NCOA6 |
| XP_024782616.1 | TRADDN-NCOA6 | 2041 | NCOA6          | vertebrata | Pan paniscus            | nuclear receptor coactivator 6 isoform X5 [Pan paniscus]                       | GCF_000258655.2 | TRADDN-NCOA6 |
| PNI27815.1     | TRADDN-NCOA6 | 985  | CK820_G0043061 | vertebrata | Pan troglodytes         | NCOA6 isoform 9 [Pan troglodytes]                                              | GCA_002880755.3 | TRADDN-NCOA6 |
| XP_001160316.2 | TRADDN-NCOA6 | 2066 | NCOA6          | vertebrata | Pan troglodytes         | nuclear receptor coactivator 6 isoform X1 [Pan troglodytes]                    | GCF_002880755.1 | TRADDN-NCOA6 |
| XP_009435351.2 | TRADDN-NCOA6 | 2065 | NCOA6          | vertebrata | Pan troglodytes         | nuclear receptor coactivator 6 isoform X2 [Pan troglodytes]                    | GCF_002880755.1 | TRADDN-NCOA6 |
| XP_009435352.2 | TRADDN-NCOA6 | 2055 | NCOA6          | vertebrata | Pan troglodytes         | nuclear receptor coactivator 6 isoform X3 [Pan troglodytes]                    | GCF_002880755.1 | TRADDN-NCOA6 |
| XP_009435353.2 | TRADDN-NCOA6 | 2054 | NCOA6          | vertebrata | Pan troglodytes         | nuclear receptor coactivator 6 isoform X4 [Pan troglodytes]                    | GCF_002880755.1 | TRADDN-NCOA6 |
| XP_009435354.2 | TRADDN-NCOA6 | 2037 | NCOA6          | vertebrata | Pan troglodytes         | nuclear receptor coactivator 6 isoform X5 [Pan troglodytes]                    | GCF_002880755.1 | TRADDN-NCOA6 |
| XP_016793230.1 | TRADDN-NCOA6 | 1073 | NCOA6          | vertebrata | Pan troglodytes         | nuclear receptor coactivator 6 isoform X6 [Pan troglodytes]                    | GCF_002880755.1 | TRADDN-NCOA6 |
| XP_019314267.1 | TRADDN-NCOA6 | 2075 | NCOA6          | vertebrata | Panthera pardus         | PREDICTED: nuclear receptor coactivator 6 isoform X1 [Panthera pardus]         | GCF_001857705.1 | TRADDN-NCOA6 |
| XP_019314268.1 | TRADDN-NCOA6 | 1075 | NCOA6          | vertebrata | Panthera pardus         | PREDICTED: nuclear receptor coactivator 6 isoform X2 [Panthera pardus]         | GCF_001857705.1 | TRADDN-NCOA6 |
| XP_007073664.1 | TRADDN-NCOA6 | 2088 | NCOA6          | vertebrata | Panthera tigris altaica | PREDICTED: nuclear receptor coactivator 6 isoform X1 [Panthera tigris altaica] | GCF_000464555.1 | TRADDN-NCOA6 |
| XP_007073665.1 | TRADDN-NCOA6 | 2087 | NCOA6          | vertebrata | Panthera tigris altaica | PREDICTED: nuclear receptor coactivator 6 isoform X2 [Panthera tigris altaica] | GCF_000464555.1 | TRADDN-NCOA6 |
| XP_007073666.1 | TRADDN-NCOA6 | 2077 | NCOA6          | vertebrata | Panthera tigris altaica | PREDICTED: nuclear receptor coactivator 6 isoform X3 [Panthera tigris altaica] | GCF_000464555.1 | TRADDN-NCOA6 |
| XP_007073667.1 | TRADDN-NCOA6 | 2066 | NCOA6          | vertebrata | Panthera tigris altaica | PREDICTED: nuclear receptor coactivator 6 isoform X4 [Panthera tigris altaica] | GCF_000464555.1 | TRADDN-NCOA6 |

| acc            | architecture | len  | gen.name     | taxend     | species                               | define                                                                                  | gca             | clade        |
|----------------|--------------|------|--------------|------------|---------------------------------------|-----------------------------------------------------------------------------------------|-----------------|--------------|
| XP_007073668.1 | TRADDN-NCOA6 | 2065 | NCOA6        | vertebrata | <i>Panthera tigris altaica</i>        | PREDICTED: nuclear receptor coactivator 6 isoform X5 [ <i>Panthera tigris altaica</i> ] | GCF_000464555.1 | TRADDN-NCOA6 |
| XP_007073669.1 | TRADDN-NCOA6 | 2063 | NCOA6        | vertebrata | <i>Panthera tigris altaica</i>        | PREDICTED: nuclear receptor coactivator 6 isoform X6 [ <i>Panthera tigris altaica</i> ] | GCF_000464555.1 | TRADDN-NCOA6 |
| XP_007073672.1 | TRADDN-NCOA6 | 1094 | NCOA6        | vertebrata | <i>Panthera tigris altaica</i>        | PREDICTED: nuclear receptor coactivator 6 isoform X7 [ <i>Panthera tigris altaica</i> ] | GCF_000464555.1 | TRADDN-NCOA6 |
| XP_005976899.1 | TRADDN-NCOA6 | 2056 | NCOA6        | vertebrata | <i>Pantholops hodgsonii</i>           | PREDICTED: nuclear receptor coactivator 6 [ <i>Pantholops hodgsonii</i> ]               | -               | TRADDN-NCOA6 |
| XP_009214527.1 | TRADDN-NCOA6 | 2072 | NCOA6        | vertebrata | <i>Papio anubis</i>                   | nuclear receptor coactivator 6 isoform X1 [ <i>Papio anubis</i> ]                       | GCF_000264685.3 | TRADDN-NCOA6 |
| XP_009214528.1 | TRADDN-NCOA6 | 2071 | NCOA6        | vertebrata | <i>Papio anubis</i>                   | nuclear receptor coactivator 6 isoform X2 [ <i>Papio anubis</i> ]                       | GCF_000264685.3 | TRADDN-NCOA6 |
| XP_009214529.1 | TRADDN-NCOA6 | 2063 | NCOA6        | vertebrata | <i>Papio anubis</i>                   | nuclear receptor coactivator 6 isoform X3 [ <i>Papio anubis</i> ]                       | GCF_000264685.3 | TRADDN-NCOA6 |
| XP_009214530.1 | TRADDN-NCOA6 | 2061 | NCOA6        | vertebrata | <i>Papio anubis</i>                   | nuclear receptor coactivator 6 isoform X4 [ <i>Papio anubis</i> ]                       | GCF_000264685.3 | TRADDN-NCOA6 |
| XP_009214531.1 | TRADDN-NCOA6 | 2060 | NCOA6        | vertebrata | <i>Papio anubis</i>                   | nuclear receptor coactivator 6 isoform X5 [ <i>Papio anubis</i> ]                       | GCF_000264685.3 | TRADDN-NCOA6 |
| XP_009214535.1 | TRADDN-NCOA6 | 1077 | NCOA6        | vertebrata | <i>Papio anubis</i>                   | nuclear receptor coactivator 6 isoform X8 [ <i>Papio anubis</i> ]                       | GCF_000264685.3 | TRADDN-NCOA6 |
| XP_009214536.1 | TRADDN-NCOA6 | 1068 | NCOA6        | vertebrata | <i>Papio anubis</i>                   | nuclear receptor coactivator 6 isoform X9 [ <i>Papio anubis</i> ]                       | GCF_000264685.3 | TRADDN-NCOA6 |
| XP_015502926.1 | TRADDN-NCOA6 | 2033 | NCOA6        | vertebrata | <i>Parus major</i>                    | PREDICTED: nuclear receptor coactivator 6 [ <i>Parus major</i> ]                        | GCF_001522545.3 | TRADDN-NCOA6 |
| OPJ70713.1     | TRADDN-NCOA6 | 928  | NCOA6        | vertebrata | <i>Patagioenas fasciata monilis</i>   | nuclear receptor coactivator 6 [ <i>Patagioenas fasciata monilis</i> ]                  | GCA_002029285.1 | TRADDN-NCOA6 |
| KFQ54008.1     | TRADDN-NCOA6 | 170  | N334_04406   | vertebrata | <i>Pelecanus crispus</i>              | Nuclear receptor coactivator 6, partial [ <i>Pelecanus crispus</i> ]                    | GCA_000687375.1 | TRADDN-NCOA6 |
| XP_025042210.1 | TRADDN-NCOA6 | 2025 | NCOA6        | vertebrata | <i>Pelodiscus sinensis</i>            | LOW QUALITY PROTEIN: nuclear receptor coactivator 6 [ <i>Pelodiscus sinensis</i> ]      | GCF_000230535.1 | TRADDN-NCOA6 |
| XP_015862217.1 | TRADDN-NCOA6 | 1990 | Ncoa6        | vertebrata | <i>Peromyscus maniculatus bairdii</i> | PREDICTED: nuclear receptor coactivator 6 [ <i>Peromyscus maniculatus bairdii</i> ]     | GCF_000500345.1 | TRADDN-NCOA6 |
| KFQ70233.1     | TRADDN-NCOA6 | 170  | N335_04326   | vertebrata | <i>Phaethon lepturus</i>              | Nuclear receptor coactivator 6, partial [ <i>Phaethon lepturus</i> ]                    | GCA_000687285.1 | TRADDN-NCOA6 |
| XP_010294641.1 | TRADDN-NCOA6 | 992  | LOC104627927 | vertebrata | <i>Phaethon lepturus</i>              | PREDICTED: nuclear receptor coactivator 6-like, partial [ <i>Phaethon lepturus</i> ]    | GCF_000687285.1 | TRADDN-NCOA6 |
| KFW95898.1     | TRADDN-NCOA6 | 170  | N336_09921   | vertebrata | <i>Phalacrocorax carbo</i>            | Nuclear receptor coactivator 6, partial [ <i>Phalacrocorax carbo</i> ]                  | GCA_000708925.1 | TRADDN-NCOA6 |
| XP_020854203.1 | TRADDN-NCOA6 | 2056 | NCOA6        | vertebrata | <i>Phascolarctos cinereus</i>         | nuclear receptor coactivator 6 isoform X1 [ <i>Phascolarctos cinereus</i> ]             | GCF_002099425.1 | TRADDN-NCOA6 |
| XP_020854204.1 | TRADDN-NCOA6 | 1622 | NCOA6        | vertebrata | <i>Phascolarctos cinereus</i>         | nuclear receptor coactivator 6 isoform X2 [ <i>Phascolarctos cinereus</i> ]             | GCF_002099425.1 | TRADDN-NCOA6 |
| XP_020854206.1 | TRADDN-NCOA6 | 1056 | NCOA6        | vertebrata | <i>Phascolarctos cinereus</i>         | nuclear receptor coactivator 6 isoform X4 [ <i>Phascolarctos cinereus</i> ]             | GCF_002099425.1 | TRADDN-NCOA6 |
| KFQ87443.1     | TRADDN-NCOA6 | 170  | N337_03435   | vertebrata | <i>Phoenicopterus ruber ruber</i>     | Nuclear receptor coactivator 6, partial [ <i>Phoenicopterus ruber ruber</i> ]           | GCA_000687265.1 | TRADDN-NCOA6 |

| acc            | architecture | len  | gen.name       | taxend     | species                   | define                                                                               | gca             | clade        |
|----------------|--------------|------|----------------|------------|---------------------------|--------------------------------------------------------------------------------------|-----------------|--------------|
| XP_023984297.1 | TRADDN-NCOA6 | 2040 | NCOA6          | vertebrata | Physeter catodon          | nuclear receptor coactivator 6 [Physeter catodon]                                    | -               | TRADDN-NCOA6 |
| XP_009901667.1 | TRADDN-NCOA6 | 1866 | NCOA6          | vertebrata | Picooides pubescens       | PREDICTED: LOW QUALITY PROTEIN: nuclear receptor coactivator 6 [Picooides pubescens] | GCF_000699005.1 | TRADDN-NCOA6 |
| XP_023076250.1 | TRADDN-NCOA6 | 2065 | NCOA6          | vertebrata | Piliocolobus tephrosceles | nuclear receptor coactivator 6 isoform X1 [Piliocolobus tephrosceles]                | GCF_002776525.2 | TRADDN-NCOA6 |
| XP_023076252.1 | TRADDN-NCOA6 | 2064 | NCOA6          | vertebrata | Piliocolobus tephrosceles | nuclear receptor coactivator 6 isoform X2 [Piliocolobus tephrosceles]                | GCF_002776525.2 | TRADDN-NCOA6 |
| XP_023076253.1 | TRADDN-NCOA6 | 2054 | NCOA6          | vertebrata | Piliocolobus tephrosceles | nuclear receptor coactivator 6 isoform X3 [Piliocolobus tephrosceles]                | GCF_002776525.2 | TRADDN-NCOA6 |
| XP_023076254.1 | TRADDN-NCOA6 | 2053 | NCOA6          | vertebrata | Piliocolobus tephrosceles | nuclear receptor coactivator 6 isoform X4 [Piliocolobus tephrosceles]                | GCF_002776525.2 | TRADDN-NCOA6 |
| XP_023076255.1 | TRADDN-NCOA6 | 2060 | NCOA6          | vertebrata | Piliocolobus tephrosceles | nuclear receptor coactivator 6 isoform X5 [Piliocolobus tephrosceles]                | GCF_002776525.2 | TRADDN-NCOA6 |
| XP_023076259.1 | TRADDN-NCOA6 | 1074 | NCOA6          | vertebrata | Piliocolobus tephrosceles | nuclear receptor coactivator 6 isoform X7 [Piliocolobus tephrosceles]                | GCF_002776525.2 | TRADDN-NCOA6 |
| XP_023076260.1 | TRADDN-NCOA6 | 1069 | NCOA6          | vertebrata | Piliocolobus tephrosceles | nuclear receptor coactivator 6 isoform X8 [Piliocolobus tephrosceles]                | GCF_002776525.2 | TRADDN-NCOA6 |
| KFZ66672.1     | TRADDN-NCOA6 | 1954 | N338_03763     | vertebrata | Podiceps cristatus        | Nuclear receptor coactivator 6, partial [Podiceps cristatus]                         | GCA_000699545.1 | TRADDN-NCOA6 |
| XP_020656752.1 | TRADDN-NCOA6 | 2038 | NCOA6          | vertebrata | Pogona vitticeps          | nuclear receptor coactivator 6 [Pogona vitticeps]                                    | GCF_900067755.1 | TRADDN-NCOA6 |
| PNJ57496.1     | TRADDN-NCOA6 | 980  | CR201_G0018618 | vertebrata | Pongo abelii              | NCOA6 isoform 9 [Pongo abelii]                                                       | GCA_002880775.3 | TRADDN-NCOA6 |
| XP_024094451.1 | TRADDN-NCOA6 | 2067 | NCOA6          | vertebrata | Pongo abelii              | nuclear receptor coactivator 6 isoform X1 [Pongo abelii]                             | GCF_002880775.1 | TRADDN-NCOA6 |
| XP_024094454.1 | TRADDN-NCOA6 | 2066 | NCOA6          | vertebrata | Pongo abelii              | nuclear receptor coactivator 6 isoform X2 [Pongo abelii]                             | GCF_002880775.1 | TRADDN-NCOA6 |
| XP_024094455.1 | TRADDN-NCOA6 | 2056 | NCOA6          | vertebrata | Pongo abelii              | nuclear receptor coactivator 6 isoform X3 [Pongo abelii]                             | GCF_002880775.1 | TRADDN-NCOA6 |
| XP_024094456.1 | TRADDN-NCOA6 | 2055 | NCOA6          | vertebrata | Pongo abelii              | nuclear receptor coactivator 6 isoform X4 [Pongo abelii]                             | GCF_002880775.1 | TRADDN-NCOA6 |
| XP_024094457.1 | TRADDN-NCOA6 | 1969 | NCOA6          | vertebrata | Pongo abelii              | nuclear receptor coactivator 6 isoform X5 [Pongo abelii]                             | GCF_002880775.1 | TRADDN-NCOA6 |
| XP_024094458.1 | TRADDN-NCOA6 | 1075 | NCOA6          | vertebrata | Pongo abelii              | nuclear receptor coactivator 6 isoform X6 [Pongo abelii]                             | GCF_002880775.1 | TRADDN-NCOA6 |
| XP_012493131.1 | TRADDN-NCOA6 | 2057 | NCOA6          | vertebrata | Propithecus coquereli     | PREDICTED: nuclear receptor coactivator 6 isoform X1 [Propithecus coquereli]         | GCF_000956105.1 | TRADDN-NCOA6 |
| XP_012493132.1 | TRADDN-NCOA6 | 2046 | NCOA6          | vertebrata | Propithecus coquereli     | PREDICTED: nuclear receptor coactivator 6 isoform X2 [Propithecus coquereli]         | GCF_000956105.1 | TRADDN-NCOA6 |
| XP_012493133.1 | TRADDN-NCOA6 | 2034 | NCOA6          | vertebrata | Propithecus coquereli     | PREDICTED: nuclear receptor coactivator 6 isoform X3 [Propithecus coquereli]         | GCF_000956105.1 | TRADDN-NCOA6 |

| acc            | architecture | len  | gen.name                  | taxend     | species                      | define                                                                              | gca             | clade        |
|----------------|--------------|------|---------------------------|------------|------------------------------|-------------------------------------------------------------------------------------|-----------------|--------------|
| XP_015672481.1 | TRADDN-NCOA6 | 2049 | NCOA6                     | vertebrata | Protobothrops mucrosquamatus | PREDICTED: nuclear receptor coactivator 6 [Protobothrops mucrosquamatus]            | GCF_001527695.2 | TRADDN-NCOA6 |
| XP_014116263.1 | TRADDN-NCOA6 | 2033 | NCOA6                     | vertebrata | Pseudopodoces humilis        | PREDICTED: nuclear receptor coactivator 6 isoform X1 [Pseudopodoces humilis]        | GCF_000331425.1 | TRADDN-NCOA6 |
| XP_014116264.1 | TRADDN-NCOA6 | 1990 | NCOA6                     | vertebrata | Pseudopodoces humilis        | PREDICTED: nuclear receptor coactivator 6 isoform X2 [Pseudopodoces humilis]        | GCF_000331425.1 | TRADDN-NCOA6 |
| XP_014116266.1 | TRADDN-NCOA6 | 1984 | NCOA6                     | vertebrata | Pseudopodoces humilis        | PREDICTED: nuclear receptor coactivator 6 isoform X3 [Pseudopodoces humilis]        | GCF_000331425.1 | TRADDN-NCOA6 |
| KFV06441.1     | TRADDN-NCOA6 | 170  | N339_08685                | vertebrata | Pterocles gutturalis         | Nuclear receptor coactivator 6, partial [Pterocles gutturalis]                      | GCA_000699245.1 | TRADDN-NCOA6 |
| XP_010071209.1 | TRADDN-NCOA6 | 535  | LOC104461352              | vertebrata | Pterocles gutturalis         | PREDICTED: nuclear receptor coactivator 6-like, partial [Pterocles gutturalis]      | GCF_000699245.1 | TRADDN-NCOA6 |
| ELK04121.1     | TRADDN-NCOA6 | 1475 | PAL_GLEAN10024254         | vertebrata | Pteropus alecto              | Nuclear receptor coactivator 6 [Pteropus alecto]                                    | GCA_000325575.1 | TRADDN-NCOA6 |
| XP_024895575.1 | TRADDN-NCOA6 | 1061 | NCOA6                     | vertebrata | Pteropus alecto              | nuclear receptor coactivator 6 isoform X1 [Pteropus alecto]                         | GCF_000325575.1 | TRADDN-NCOA6 |
| XP_024895576.1 | TRADDN-NCOA6 | 2058 | NCOA6                     | vertebrata | Pteropus alecto              | nuclear receptor coactivator 6 isoform X2 [Pteropus alecto]                         | GCF_000325575.1 | TRADDN-NCOA6 |
| XP_011376599.1 | TRADDN-NCOA6 | 2058 | NCOA6                     | vertebrata | Pteropus vampyrus            | nuclear receptor coactivator 6 isoform X1 [Pteropus vampyrus]                       | GCF_000151845.1 | TRADDN-NCOA6 |
| XP_011376602.1 | TRADDN-NCOA6 | 2047 | NCOA6                     | vertebrata | Pteropus vampyrus            | nuclear receptor coactivator 6 isoform X3 [Pteropus vampyrus]                       | GCF_000151845.1 | TRADDN-NCOA6 |
| XP_011376604.1 | TRADDN-NCOA6 | 2046 | NCOA6                     | vertebrata | Pteropus vampyrus            | nuclear receptor coactivator 6 isoform X4 [Pteropus vampyrus]                       | GCF_000151845.1 | TRADDN-NCOA6 |
| XP_011376605.1 | TRADDN-NCOA6 | 1061 | NCOA6                     | vertebrata | Pteropus vampyrus            | nuclear receptor coactivator 6 isoform X6 [Pteropus vampyrus]                       | GCF_000151845.1 | TRADDN-NCOA6 |
| XP_023377983.1 | TRADDN-NCOA6 | 2047 | NCOA6                     | vertebrata | Pteropus vampyrus            | nuclear receptor coactivator 6 isoform X2 [Pteropus vampyrus]                       | GCF_000151845.1 | TRADDN-NCOA6 |
| XP_023377984.1 | TRADDN-NCOA6 | 2035 | NCOA6                     | vertebrata | Pteropus vampyrus            | nuclear receptor coactivator 6 isoform X5 [Pteropus vampyrus]                       | GCF_000151845.1 | TRADDN-NCOA6 |
| XP_009327609.1 | TRADDN-NCOA6 | 2045 | NCOA6                     | vertebrata | Pygoscelis adeliae           | PREDICTED: LOW QUALITY PROTEIN: nuclear receptor coactivator 6 [Pygoscelis adeliae] | GCF_000699105.1 | TRADDN-NCOA6 |
| XP_025023946.1 | TRADDN-NCOA6 | 2043 | NCOA6                     | vertebrata | Python bivittatus            | nuclear receptor coactivator 6 [Python bivittatus]                                  | GCF_000186305.1 | TRADDN-NCOA6 |
| PIN98361.1     | TRADDN-NCOA6 | 912  | AB205_0179540             | vertebrata | Rana catesbeiana             | hypothetical protein AB205_0179540, partial [Rana catesbeiana]                      | GCA_002284835.2 | TRADDN-NCOA6 |
| NP_001263643.1 | TRADDN-NCOA6 | 2058 | Aib3,NRC,PRIP,RAP250,Trbp | vertebrata | Rattus norvegicus            | nuclear receptor coactivator 6 [Rattus norvegicus]                                  | GCF_000002265.2 | TRADDN-NCOA6 |
| XP_008760518.1 | TRADDN-NCOA6 | 2057 | Aib3,NRC,PRIP,RAP250,Trbp | vertebrata | Rattus norvegicus            | PREDICTED: nuclear receptor coactivator 6 isoform X2 [Rattus norvegicus]            | GCF_000001895.5 | TRADDN-NCOA6 |
| XP_008760519.1 | TRADDN-NCOA6 | 2047 | Aib3,NRC,PRIP,RAP250,Trbp | vertebrata | Rattus norvegicus            | PREDICTED: nuclear receptor coactivator 6 isoform X3 [Rattus norvegicus]            | GCF_000001895.5 | TRADDN-NCOA6 |

| acc            | architecture | len  | gen.name                  | taxend     | species                 | define                                                                         | gca             | clade        |
|----------------|--------------|------|---------------------------|------------|-------------------------|--------------------------------------------------------------------------------|-----------------|--------------|
| XP_008760520.1 | TRADDN-NCOA6 | 2046 | Aib3,NRC,PRIP,RAP250,Trbp | vertebrata | Rattus norvegicus       | PREDICTED: nuclear receptor coactivator 6 isoform X4 [Rattus norvegicus]       | GCF_000001895.5 | TRADDN-NCOA6 |
| XP_008760521.1 | TRADDN-NCOA6 | 1066 | Aib3,NRC,PRIP,RAP250,Trbp | vertebrata | Rattus norvegicus       | PREDICTED: nuclear receptor coactivator 6 isoform X5 [Rattus norvegicus]       | GCF_000001895.5 | TRADDN-NCOA6 |
| XP_020371347.1 | TRADDN-NCOA6 | 2026 | ncoa6                     | vertebrata | Rhincodon typus         | nuclear receptor coactivator 6 isoform X1 [Rhincodon typus]                    | GCF_001642345.1 | TRADDN-NCOA6 |
| XP_020371348.1 | TRADDN-NCOA6 | 2025 | ncoa6                     | vertebrata | Rhincodon typus         | nuclear receptor coactivator 6 isoform X2 [Rhincodon typus]                    | GCF_001642345.1 | TRADDN-NCOA6 |
| XP_020371349.1 | TRADDN-NCOA6 | 1857 | ncoa6                     | vertebrata | Rhincodon typus         | nuclear receptor coactivator 6 isoform X3 [Rhincodon typus]                    | GCF_001642345.1 | TRADDN-NCOA6 |
| XP_020371350.1 | TRADDN-NCOA6 | 1856 | ncoa6                     | vertebrata | Rhincodon typus         | nuclear receptor coactivator 6 isoform X4 [Rhincodon typus]                    | GCF_001642345.1 | TRADDN-NCOA6 |
| XP_019589097.1 | TRADDN-NCOA6 | 2067 | NCOA6                     | vertebrata | Rhinolophus sinicus     | PREDICTED: nuclear receptor coactivator 6 isoform X1 [Rhinolophus sinicus]     | -               | TRADDN-NCOA6 |
| XP_019589126.1 | TRADDN-NCOA6 | 2066 | NCOA6                     | vertebrata | Rhinolophus sinicus     | PREDICTED: nuclear receptor coactivator 6 isoform X2 [Rhinolophus sinicus]     | -               | TRADDN-NCOA6 |
| XP_019589136.1 | TRADDN-NCOA6 | 2056 | NCOA6                     | vertebrata | Rhinolophus sinicus     | PREDICTED: nuclear receptor coactivator 6 isoform X3 [Rhinolophus sinicus]     | -               | TRADDN-NCOA6 |
| XP_019589146.1 | TRADDN-NCOA6 | 2055 | NCOA6                     | vertebrata | Rhinolophus sinicus     | PREDICTED: nuclear receptor coactivator 6 isoform X4 [Rhinolophus sinicus]     | -               | TRADDN-NCOA6 |
| XP_019589157.1 | TRADDN-NCOA6 | 1967 | NCOA6                     | vertebrata | Rhinolophus sinicus     | PREDICTED: nuclear receptor coactivator 6 isoform X5 [Rhinolophus sinicus]     | -               | TRADDN-NCOA6 |
| XP_017734234.1 | TRADDN-NCOA6 | 2062 | NCOA6                     | vertebrata | Rhinopithecus bieti     | PREDICTED: nuclear receptor coactivator 6 isoform X1 [Rhinopithecus bieti]     | GCF_001698545.1 | TRADDN-NCOA6 |
| XP_017734242.1 | TRADDN-NCOA6 | 2061 | NCOA6                     | vertebrata | Rhinopithecus bieti     | PREDICTED: nuclear receptor coactivator 6 isoform X2 [Rhinopithecus bieti]     | GCF_001698545.1 | TRADDN-NCOA6 |
| XP_017734251.1 | TRADDN-NCOA6 | 2051 | NCOA6                     | vertebrata | Rhinopithecus bieti     | PREDICTED: nuclear receptor coactivator 6 isoform X3 [Rhinopithecus bieti]     | GCF_001698545.1 | TRADDN-NCOA6 |
| XP_017734255.1 | TRADDN-NCOA6 | 2050 | NCOA6                     | vertebrata | Rhinopithecus bieti     | PREDICTED: nuclear receptor coactivator 6 isoform X4 [Rhinopithecus bieti]     | GCF_001698545.1 | TRADDN-NCOA6 |
| XP_017734258.1 | TRADDN-NCOA6 | 1974 | NCOA6                     | vertebrata | Rhinopithecus bieti     | PREDICTED: nuclear receptor coactivator 6 isoform X5 [Rhinopithecus bieti]     | GCF_001698545.1 | TRADDN-NCOA6 |
| XP_017734266.1 | TRADDN-NCOA6 | 1070 | NCOA6                     | vertebrata | Rhinopithecus bieti     | PREDICTED: nuclear receptor coactivator 6 isoform X6 [Rhinopithecus bieti]     | GCF_001698545.1 | TRADDN-NCOA6 |
| XP_010384811.1 | TRADDN-NCOA6 | 2063 | NCOA6                     | vertebrata | Rhinopithecus roxellana | PREDICTED: nuclear receptor coactivator 6 isoform X1 [Rhinopithecus roxellana] | -               | TRADDN-NCOA6 |



| acc            | architecture | len  | gen.name   | taxend     | species                         | define                                                                                 | gca             | clade        |
|----------------|--------------|------|------------|------------|---------------------------------|----------------------------------------------------------------------------------------|-----------------|--------------|
| XP_010384812.1 | TRADDN-NCOA6 | 2062 | NCOA6      | vertebrata | Rhinopithecus roxellana         | PREDICTED: nuclear receptor coactivator 6 isoform X2 [Rhinopithecus roxellana]         | -               | TRADDN-NCOA6 |
| XP_015981895.1 | TRADDN-NCOA6 | 2060 | NCOA6      | vertebrata | Rousettus aegyptiacus           | PREDICTED: nuclear receptor coactivator 6 isoform X1 [Rousettus aegyptiacus]           | GCF_001466805.2 | TRADDN-NCOA6 |
| XP_015981903.1 | TRADDN-NCOA6 | 2049 | NCOA6      | vertebrata | Rousettus aegyptiacus           | PREDICTED: nuclear receptor coactivator 6 isoform X2 [Rousettus aegyptiacus]           | GCF_001466805.2 | TRADDN-NCOA6 |
| XP_015981904.1 | TRADDN-NCOA6 | 2049 | NCOA6      | vertebrata | Rousettus aegyptiacus           | PREDICTED: nuclear receptor coactivator 6 isoform X3 [Rousettus aegyptiacus]           | GCF_001466805.2 | TRADDN-NCOA6 |
| XP_015981905.1 | TRADDN-NCOA6 | 2048 | NCOA6      | vertebrata | Rousettus aegyptiacus           | PREDICTED: nuclear receptor coactivator 6 isoform X4 [Rousettus aegyptiacus]           | GCF_001466805.2 | TRADDN-NCOA6 |
| XP_015981906.1 | TRADDN-NCOA6 | 1960 | NCOA6      | vertebrata | Rousettus aegyptiacus           | PREDICTED: nuclear receptor coactivator 6 isoform X5 [Rousettus aegyptiacus]           | GCF_001466805.2 | TRADDN-NCOA6 |
| XP_015981908.1 | TRADDN-NCOA6 | 1061 | NCOA6      | vertebrata | Rousettus aegyptiacus           | PREDICTED: nuclear receptor coactivator 6 isoform X7 [Rousettus aegyptiacus]           | GCF_001466805.2 | TRADDN-NCOA6 |
| XP_010340981.1 | TRADDN-NCOA6 | 2065 | NCOA6      | vertebrata | Saimiri boliviensis boliviensis | PREDICTED: nuclear receptor coactivator 6 isoform X1 [Saimiri boliviensis boliviensis] | GCF_000235385.1 | TRADDN-NCOA6 |
| XP_010340983.1 | TRADDN-NCOA6 | 2064 | NCOA6      | vertebrata | Saimiri boliviensis boliviensis | PREDICTED: nuclear receptor coactivator 6 isoform X2 [Saimiri boliviensis boliviensis] | GCF_000235385.1 | TRADDN-NCOA6 |
| XP_010340984.1 | TRADDN-NCOA6 | 2053 | NCOA6      | vertebrata | Saimiri boliviensis boliviensis | PREDICTED: nuclear receptor coactivator 6 isoform X3 [Saimiri boliviensis boliviensis] | GCF_000235385.1 | TRADDN-NCOA6 |
| XP_003756975.1 | TRADDN-NCOA6 | 2063 | NCOA6      | vertebrata | Sarcophilus harrisi             | nuclear receptor coactivator 6 isoform X1 [Sarcophilus harrisi]                        | GCF_000189315.1 | TRADDN-NCOA6 |
| XP_012408688.1 | TRADDN-NCOA6 | 1695 | NCOA6      | vertebrata | Sarcophilus harrisi             | nuclear receptor coactivator 6 isoform X3 [Sarcophilus harrisi]                        | GCF_000189315.1 | TRADDN-NCOA6 |
| XP_023362736.1 | TRADDN-NCOA6 | 1915 | NCOA6      | vertebrata | Sarcophilus harrisi             | nuclear receptor coactivator 6 isoform X2 [Sarcophilus harrisi]                        | GCF_000189315.1 | TRADDN-NCOA6 |
| XP_018779346.1 | TRADDN-NCOA6 | 1058 | NCOA6      | vertebrata | Serinus canaria                 | PREDICTED: nuclear receptor coactivator 6 [Serinus canaria]                            | -               | TRADDN-NCOA6 |
| XP_004612606.1 | TRADDN-NCOA6 | 2057 | NCOA6      | vertebrata | Sorex araneus                   | PREDICTED: nuclear receptor coactivator 6 isoform X1 [Sorex araneus]                   | GCF_000181275.1 | TRADDN-NCOA6 |
| XP_004612607.1 | TRADDN-NCOA6 | 1055 | NCOA6      | vertebrata | Sorex araneus                   | PREDICTED: nuclear receptor coactivator 6 isoform X2 [Sorex araneus]                   | GCF_000181275.1 | TRADDN-NCOA6 |
| KFV83564.1     | TRADDN-NCOA6 | 2033 | N308_06379 | vertebrata | Struthio camelus australis      | Nuclear receptor coactivator 6 [Struthio camelus australis]                            | GCA_000698965.1 | TRADDN-NCOA6 |
| XP_009677514.1 | TRADDN-NCOA6 | 2055 | NCOA6      | vertebrata | Struthio camelus australis      | PREDICTED: nuclear receptor coactivator 6 isoform X1 [Struthio camelus australis]      | GCF_000698965.1 | TRADDN-NCOA6 |
| XP_009677516.1 | TRADDN-NCOA6 | 2054 | NCOA6      | vertebrata | Struthio camelus australis      | PREDICTED: nuclear receptor coactivator 6 isoform X2 [Struthio camelus australis]      | GCF_000698965.1 | TRADDN-NCOA6 |

| acc            | architecture | len  | gen.name     | taxend     | species                        | define                                                                            | gca             | clade        |
|----------------|--------------|------|--------------|------------|--------------------------------|-----------------------------------------------------------------------------------|-----------------|--------------|
| XP_009677517.1 | TRADDN-NCOA6 | 1993 | NCOA6        | vertebrata | Struthio camelus australis     | PREDICTED: nuclear receptor coactivator 6 isoform X3 [Struthio camelus australis] | GCF_000698965.1 | TRADDN-NCOA6 |
| XP_009677518.1 | TRADDN-NCOA6 | 1985 | NCOA6        | vertebrata | Struthio camelus australis     | PREDICTED: nuclear receptor coactivator 6 isoform X4 [Struthio camelus australis] | GCF_000698965.1 | TRADDN-NCOA6 |
| XP_009677519.1 | TRADDN-NCOA6 | 1783 | NCOA6        | vertebrata | Struthio camelus australis     | PREDICTED: nuclear receptor coactivator 6 isoform X5 [Struthio camelus australis] | GCF_000698965.1 | TRADDN-NCOA6 |
| XP_014741744.1 | TRADDN-NCOA6 | 2051 | NCOA6        | vertebrata | Sturnus vulgaris               | PREDICTED: nuclear receptor coactivator 6 isoform X1 [Sturnus vulgaris]           | GCF_001447265.1 | TRADDN-NCOA6 |
| XP_014741745.1 | TRADDN-NCOA6 | 2038 | NCOA6        | vertebrata | Sturnus vulgaris               | PREDICTED: nuclear receptor coactivator 6 isoform X2 [Sturnus vulgaris]           | GCF_001447265.1 | TRADDN-NCOA6 |
| XP_013840750.1 | TRADDN-NCOA6 | 2061 | NCOA6        | vertebrata | Sus scrofa                     | nuclear receptor coactivator 6 isoform X1 [Sus scrofa]                            | GCF_000003025.6 | TRADDN-NCOA6 |
| XP_020933952.1 | TRADDN-NCOA6 | 2060 | NCOA6        | vertebrata | Sus scrofa                     | nuclear receptor coactivator 6 isoform X2 [Sus scrofa]                            | GCF_000003025.6 | TRADDN-NCOA6 |
| XP_020933953.1 | TRADDN-NCOA6 | 2050 | NCOA6        | vertebrata | Sus scrofa                     | nuclear receptor coactivator 6 isoform X3 [Sus scrofa]                            | GCF_000003025.6 | TRADDN-NCOA6 |
| XP_020933956.1 | TRADDN-NCOA6 | 2049 | NCOA6        | vertebrata | Sus scrofa                     | nuclear receptor coactivator 6 isoform X4 [Sus scrofa]                            | GCF_000003025.6 | TRADDN-NCOA6 |
| XP_020933958.1 | TRADDN-NCOA6 | 1736 | NCOA6        | vertebrata | Sus scrofa                     | nuclear receptor coactivator 6 isoform X5 [Sus scrofa]                            | GCF_000003025.6 | TRADDN-NCOA6 |
| XP_004175601.1 | TRADDN-NCOA6 | 213  | LOC101233431 | vertebrata | Taeniopygia guttata            | PREDICTED: nuclear receptor coactivator 6-like, partial [Taeniopygia guttata]     | -               | TRADDN-NCOA6 |
| XP_012425613.1 | TRADDN-NCOA6 | 1047 | NCOA6        | vertebrata | Taeniopygia guttata            | PREDICTED: nuclear receptor coactivator 6 [Taeniopygia guttata]                   | -               | TRADDN-NCOA6 |
| KFV06893.1     | TRADDN-NCOA6 | 1877 | N340_13206   | vertebrata | Tauraco erythrolophus          | Nuclear receptor coactivator 6, partial [Tauraco erythrolophus]                   | GCA_000709365.1 | TRADDN-NCOA6 |
| XP_009990530.1 | TRADDN-NCOA6 | 1864 | NCOA6        | vertebrata | Tauraco erythrolophus          | PREDICTED: nuclear receptor coactivator 6, partial [Tauraco erythrolophus]        | GCF_000709365.1 | TRADDN-NCOA6 |
| XP_024051101.1 | TRADDN-NCOA6 | 2020 | NCOA6        | vertebrata | Terrapene mexicana triunguis   | nuclear receptor coactivator 6 isoform X1 [Terrapene mexicana triunguis]          | -               | TRADDN-NCOA6 |
| XP_024051103.1 | TRADDN-NCOA6 | 1748 | NCOA6        | vertebrata | Terrapene mexicana triunguis   | nuclear receptor coactivator 6 isoform X2 [Terrapene mexicana triunguis]          | -               | TRADDN-NCOA6 |
| XP_013908633.1 | TRADDN-NCOA6 | 2049 | NCOA6        | vertebrata | Thamnophis sirtalis            | PREDICTED: nuclear receptor coactivator 6 [Thamnophis sirtalis]                   | GCF_001077635.1 | TRADDN-NCOA6 |
| XP_025254383.1 | TRADDN-NCOA6 | 2065 | NCOA6        | vertebrata | Theropithecus gelada           | nuclear receptor coactivator 6 [Theropithecus gelada]                             | GCF_003255815.1 | TRADDN-NCOA6 |
| XP_010223929.1 | TRADDN-NCOA6 | 1044 | NCOA6        | vertebrata | Tinamus guttatus               | PREDICTED: nuclear receptor coactivator 6 [Tinamus guttatus]                      | GCF_000705375.1 | TRADDN-NCOA6 |
| XP_004370473.1 | TRADDN-NCOA6 | 2051 | LOC101354990 | vertebrata | Trichechus manatus latirostris | nuclear receptor coactivator 6 isoform X1 [Trichechus manatus latirostris]        | GCF_000243295.1 | TRADDN-NCOA6 |

| acc            | architecture | len  | gen.name         | taxend     | species                        | define                                                                     | gca             | clade        |
|----------------|--------------|------|------------------|------------|--------------------------------|----------------------------------------------------------------------------|-----------------|--------------|
| XP_023580929.1 | TRADDN-NCOA6 | 2050 | LOC101354990     | vertebrata | Trichechus manatus latirostris | nuclear receptor coactivator 6 isoform X2 [Trichechus manatus latirostris] | GCF_000243295.1 | TRADDN-NCOA6 |
| ELW69582.1     | TRADDN-NCOA6 | 2038 | TREES_T100008603 | vertebrata | Tupaia chinensis               | Nuclear receptor coactivator 6 [Tupaia chinensis]                          | GCA_000334495.1 | TRADDN-NCOA6 |
| XP_006144094.2 | TRADDN-NCOA6 | 2068 | NCOA6            | vertebrata | Tupaia chinensis               | PREDICTED: nuclear receptor coactivator 6 isoform X3 [Tupaia chinensis]    | -               | TRADDN-NCOA6 |
| XP_006144095.2 | TRADDN-NCOA6 | 2067 | NCOA6            | vertebrata | Tupaia chinensis               | PREDICTED: nuclear receptor coactivator 6 isoform X4 [Tupaia chinensis]    | -               | TRADDN-NCOA6 |
| XP_006144096.1 | TRADDN-NCOA6 | 2064 | NCOA6            | vertebrata | Tupaia chinensis               | PREDICTED: nuclear receptor coactivator 6 isoform X5 [Tupaia chinensis]    | -               | TRADDN-NCOA6 |
| XP_006144097.1 | TRADDN-NCOA6 | 2075 | NCOA6            | vertebrata | Tupaia chinensis               | PREDICTED: nuclear receptor coactivator 6 isoform X6 [Tupaia chinensis]    | GCF_000334495.1 | TRADDN-NCOA6 |
| XP_006144098.1 | TRADDN-NCOA6 | 1077 | NCOA6            | vertebrata | Tupaia chinensis               | PREDICTED: nuclear receptor coactivator 6 isoform X7 [Tupaia chinensis]    | GCF_000334495.1 | TRADDN-NCOA6 |
| XP_014441611.1 | TRADDN-NCOA6 | 2079 | NCOA6            | vertebrata | Tupaia chinensis               | PREDICTED: nuclear receptor coactivator 6 isoform X1 [Tupaia chinensis]    | -               | TRADDN-NCOA6 |
| XP_019806240.1 | TRADDN-NCOA6 | 2039 | NCOA6            | vertebrata | Tursiops truncatus             | PREDICTED: nuclear receptor coactivator 6 isoform X1 [Tursiops truncatus]  | GCF_001922835.1 | TRADDN-NCOA6 |
| XP_019806245.1 | TRADDN-NCOA6 | 2038 | NCOA6            | vertebrata | Tursiops truncatus             | PREDICTED: nuclear receptor coactivator 6 isoform X2 [Tursiops truncatus]  | GCF_001922835.1 | TRADDN-NCOA6 |
| XP_019806246.1 | TRADDN-NCOA6 | 2028 | NCOA6            | vertebrata | Tursiops truncatus             | PREDICTED: nuclear receptor coactivator 6 isoform X3 [Tursiops truncatus]  | GCF_001922835.1 | TRADDN-NCOA6 |
| XP_019806248.1 | TRADDN-NCOA6 | 2027 | NCOA6            | vertebrata | Tursiops truncatus             | PREDICTED: nuclear receptor coactivator 6 isoform X4 [Tursiops truncatus]  | GCF_001922835.1 | TRADDN-NCOA6 |
| XP_019806249.1 | TRADDN-NCOA6 | 1996 | NCOA6            | vertebrata | Tursiops truncatus             | PREDICTED: nuclear receptor coactivator 6 isoform X5 [Tursiops truncatus]  | GCF_001922835.1 | TRADDN-NCOA6 |
| XP_019806252.1 | TRADDN-NCOA6 | 1759 | NCOA6            | vertebrata | Tursiops truncatus             | PREDICTED: nuclear receptor coactivator 6 isoform X7 [Tursiops truncatus]  | GCF_001922835.1 | TRADDN-NCOA6 |
| XP_019806253.1 | TRADDN-NCOA6 | 1716 | NCOA6            | vertebrata | Tursiops truncatus             | PREDICTED: nuclear receptor coactivator 6 isoform X8 [Tursiops truncatus]  | GCF_001922835.1 | TRADDN-NCOA6 |
| XP_019806254.1 | TRADDN-NCOA6 | 1710 | NCOA6            | vertebrata | Tursiops truncatus             | PREDICTED: nuclear receptor coactivator 6 isoform X9 [Tursiops truncatus]  | GCF_001922835.1 | TRADDN-NCOA6 |
| XP_019806255.1 | TRADDN-NCOA6 | 1705 | NCOA6            | vertebrata | Tursiops truncatus             | PREDICTED: nuclear receptor coactivator 6 isoform X10 [Tursiops truncatus] | GCF_001922835.1 | TRADDN-NCOA6 |

| acc            | architecture | len  | gen.name          | taxend     | species            | define                                                                     | gca             | clade        |
|----------------|--------------|------|-------------------|------------|--------------------|----------------------------------------------------------------------------|-----------------|--------------|
| XP_019806256.1 | TRADDN-NCOA6 | 1675 | NCOA6             | vertebrata | Tursiops truncatus | PREDICTED: nuclear receptor coactivator 6 isoform X11 [Tursiops truncatus] | GCF_001922835.1 | TRADDN-NCOA6 |
| XP_019806257.1 | TRADDN-NCOA6 | 1667 | NCOA6             | vertebrata | Tursiops truncatus | PREDICTED: nuclear receptor coactivator 6 isoform X12 [Tursiops truncatus] | GCF_001922835.1 | TRADDN-NCOA6 |
| XP_019806258.1 | TRADDN-NCOA6 | 1055 | NCOA6             | vertebrata | Tursiops truncatus | PREDICTED: nuclear receptor coactivator 6 isoform X13 [Tursiops truncatus] | GCF_001922835.1 | TRADDN-NCOA6 |
| KFV49966.1     | TRADDN-NCOA6 | 170  | N341_06987        | vertebrata | Tyto alba          | Nuclear receptor coactivator 6, partial [Tyto alba]                        | GCA_000687205.1 | TRADDN-NCOA6 |
| XP_008696391.1 | TRADDN-NCOA6 | 2057 | NCOA6             | vertebrata | Ursus maritimus    | PREDICTED: nuclear receptor coactivator 6 isoform X1 [Ursus maritimus]     | GCF_000687225.1 | TRADDN-NCOA6 |
| XP_008696392.1 | TRADDN-NCOA6 | 2045 | NCOA6             | vertebrata | Ursus maritimus    | PREDICTED: nuclear receptor coactivator 6 isoform X2 [Ursus maritimus]     | GCF_000687225.1 | TRADDN-NCOA6 |
| XP_008696393.1 | TRADDN-NCOA6 | 1680 | NCOA6             | vertebrata | Ursus maritimus    | PREDICTED: nuclear receptor coactivator 6 isoform X3 [Ursus maritimus]     | GCF_000687225.1 | TRADDN-NCOA6 |
| XP_008696394.1 | TRADDN-NCOA6 | 1060 | NCOA6             | vertebrata | Ursus maritimus    | PREDICTED: nuclear receptor coactivator 6 isoform X4 [Ursus maritimus]     | GCF_000687225.1 | TRADDN-NCOA6 |
| XP_006202687.1 | TRADDN-NCOA6 | 2055 | NCOA6             | vertebrata | Vicugna pacos      | PREDICTED: nuclear receptor coactivator 6 isoform X1 [Vicugna pacos]       | GCF_000164845.1 | TRADDN-NCOA6 |
| XP_015093358.1 | TRADDN-NCOA6 | 2054 | NCOA6             | vertebrata | Vicugna pacos      | PREDICTED: nuclear receptor coactivator 6 isoform X2 [Vicugna pacos]       | GCF_000164845.1 | TRADDN-NCOA6 |
| XP_015093359.1 | TRADDN-NCOA6 | 2044 | NCOA6             | vertebrata | Vicugna pacos      | PREDICTED: nuclear receptor coactivator 6 isoform X3 [Vicugna pacos]       | GCF_000164845.1 | TRADDN-NCOA6 |
| XP_015093360.1 | TRADDN-NCOA6 | 2043 | NCOA6             | vertebrata | Vicugna pacos      | PREDICTED: nuclear receptor coactivator 6 isoform X4 [Vicugna pacos]       | GCF_000164845.1 | TRADDN-NCOA6 |
| OCT62832.1     | TRADDN-NCOA6 | 1931 | XELAEV_18043923mg | vertebrata | Xenopus laevis     | hypothetical protein XELAEV_18043923mg [Xenopus laevis]                    | GCA_001663975.1 | TRADDN-NCOA6 |
| XP_018092310.1 | TRADDN-NCOA6 | 1917 | LOC108701802      | vertebrata | Xenopus laevis     | PREDICTED: nuclear receptor coactivator 6-like [Xenopus laevis]            | GCF_001663975.1 | TRADDN-NCOA6 |
| XP_018097668.1 | TRADDN-NCOA6 | 1907 | LOC108705342      | vertebrata | Xenopus laevis     | PREDICTED: nuclear receptor coactivator 6-like isoform X1 [Xenopus laevis] | GCF_001663975.1 | TRADDN-NCOA6 |
| XP_018097669.1 | TRADDN-NCOA6 | 1906 | LOC108705342      | vertebrata | Xenopus laevis     | PREDICTED: nuclear receptor coactivator 6-like isoform X2 [Xenopus laevis] | GCF_001663975.1 | TRADDN-NCOA6 |
| XP_018097670.1 | TRADDN-NCOA6 | 1906 | LOC108705342      | vertebrata | Xenopus laevis     | PREDICTED: nuclear receptor coactivator 6-like isoform X3 [Xenopus laevis] | GCF_001663975.1 | TRADDN-NCOA6 |
| XP_018097671.1 | TRADDN-NCOA6 | 1884 | LOC108705342      | vertebrata | Xenopus laevis     | PREDICTED: nuclear receptor coactivator 6-like isoform X4 [Xenopus laevis] | GCF_001663975.1 | TRADDN-NCOA6 |

| acc            | architecture       | len  | gen.name           | taxend     | species                  | define                                                                                                               | gca             | clade        |
|----------------|--------------------|------|--------------------|------------|--------------------------|----------------------------------------------------------------------------------------------------------------------|-----------------|--------------|
| XP_018097672.1 | TRADDN-NCOA6       | 1863 | LOC108705342       | vertebrata | Xenopus laevis           | PREDICTED: nuclear receptor coactivator 6-like isoform X5 [Xenopus laevis]                                           | GCF_001663975.1 | TRADDN-NCOA6 |
| XP_018097673.1 | TRADDN-NCOA6       | 1840 | LOC108705342       | vertebrata | Xenopus laevis           | PREDICTED: nuclear receptor coactivator 6-like isoform X6 [Xenopus laevis]                                           | GCF_001663975.1 | TRADDN-NCOA6 |
| XP_018097674.1 | TRADDN-NCOA6       | 1905 | LOC108705342       | vertebrata | Xenopus laevis           | PREDICTED: nuclear receptor coactivator 6-like isoform X7 [Xenopus laevis]                                           | GCF_001663975.1 | TRADDN-NCOA6 |
| OCA21180.1     | TRADDN-NCOA6       | 167  | XENTR_v900254112mg | vertebrata | Xenopus tropicalis       | hypothetical protein XENTR_v900254112mg, partial [Xenopus tropicalis]                                                | GCA_000004195.3 | TRADDN-NCOA6 |
| XP_002932921.2 | TRADDN-NCOA6       | 1919 | ncoa6              | vertebrata | Xenopus tropicalis       | PREDICTED: nuclear receptor coactivator 6 isoform X3 [Xenopus tropicalis]                                            | GCF_000004195.3 | TRADDN-NCOA6 |
| XP_004918586.1 | TRADDN-NCOA6       | 1920 | ncoa6              | vertebrata | Xenopus tropicalis       | PREDICTED: nuclear receptor coactivator 6 isoform X1 [Xenopus tropicalis]                                            | GCF_000004195.3 | TRADDN-NCOA6 |
| XP_004918587.1 | TRADDN-NCOA6       | 1919 | ncoa6              | vertebrata | Xenopus tropicalis       | PREDICTED: nuclear receptor coactivator 6 isoform X2 [Xenopus tropicalis]                                            | GCF_000004195.3 | TRADDN-NCOA6 |
| XP_014128366.1 | TRADDN-NCOA6       | 2044 | NCOA6              | vertebrata | Zonotrichia albicollis   | PREDICTED: nuclear receptor coactivator 6 [Zonotrichia albicollis]                                                   | -               | TRADDN-NCOA6 |
| BAG63082.1     | TRADD_N            | 150  | -                  | vertebrata | Homo sapiens             | unnamed protein product [Homo sapiens]                                                                               | -               | TRADD-N      |
| XP_010716234.1 | TRADD_N            | 150  | LOC100542387       | vertebrata | Meleagris gallopavo      | PREDICTED: tumor necrosis factor receptor type 1-associated DEATH domain protein-like [Meleagris gallopavo]          | GCF_000146605.2 | TRADD-N      |
| ETE56722.1     | TRADD_N            | 143  | TRADD              | vertebrata | Ophiophagus hannah       | Tumor necrosis factor receptor type 1-associated DEATH domain protein, partial [Ophiophagus hannah]                  | GCA_000516915.1 | TRADD-N      |
| XP_001510463.1 | TRADD_N            | 110  | TRADD              | vertebrata | Ornithorhynchus anatinus | PREDICTED: tumor necrosis factor receptor type 1-associated DEATH domain protein, partial [Ornithorhynchus anatinus] | -               | TRADD-N      |
| XP_020371013.1 | TRADD_N            | 184  | LOC109915754       | vertebrata | Rhincodon typus          | tumor necrosis factor receptor type 1-associated DEATH domain protein-like [Rhincodon typus]                         | GCF_001642345.1 | TRADD-N      |
| VCW85474.1     | TRADD_N(fragments) | 94   | BN2614_LOCUS10     | vertebrata | Gulo gulo                | unnamed protein product [Gulo gulo]                                                                                  | GCA_900006375.2 | TRADD-N      |
| AAH28542.1     | TRADD_N(fragments) | 58   | Tradd              | vertebrata | Mus musculus             | Tradd protein [Mus musculus]                                                                                         | -               | TRADD-N      |
| KFP80105.1     | TRADD_N+Death      | 307  | N310_08418         | vertebrata | Acanthisitta chloris     | Tumor necrosis factor receptor type 1-associated DEATH domain protein, partial [Acanthisitta chloris]                | GCA_000695815.1 | TRADD-N      |
| XP_009072859.1 | TRADD_N+Death      | 306  | TRADD              | vertebrata | Acanthisitta chloris     | PREDICTED: tumor necrosis factor receptor type 1-associated DEATH domain protein [Acanthisitta chloris]              | GCF_000695815.1 | TRADD-N      |
| XP_014923740.1 | TRADD_N+Death      | 312  | TRADD              | vertebrata | Acinonyx jubatus         | tumor necrosis factor receptor type 1-associated DEATH domain protein [Acinonyx jubatus]                             | GCF_003709585.1 | TRADD-N      |

| acc            | architecture  | len | gen.name    | taxend     | species                    | define                                                                                                                   | gca             | clade   |
|----------------|---------------|-----|-------------|------------|----------------------------|--------------------------------------------------------------------------------------------------------------------------|-----------------|---------|
| XP_011222212.1 | TRADD_N+Death | 311 | TRADD       | vertebrata | Ailuropoda melanoleuca     | PREDICTED: tumor necrosis factor receptor type 1-associated DEATH domain protein isoform X3 [Ailuropoda melanoleuca]     | GCF_000004335.2 | TRADD-N |
| XP_019654400.1 | TRADD_N+Death | 388 | TRADD       | vertebrata | Ailuropoda melanoleuca     | PREDICTED: tumor necrosis factor receptor type 1-associated DEATH domain protein isoform X1 [Ailuropoda melanoleuca]     | GCF_000004335.2 | TRADD-N |
| XP_019654401.1 | TRADD_N+Death | 319 | TRADD       | vertebrata | Ailuropoda melanoleuca     | PREDICTED: tumor necrosis factor receptor type 1-associated DEATH domain protein isoform X2 [Ailuropoda melanoleuca]     | GCF_000004335.2 | TRADD-N |
| KYO25425.1     | TRADD_N+Death | 336 | TRADD       | vertebrata | Alligator mississippiensis | tumor necrosis factor receptor type 1-associated DEATH domain protein [Alligator mississippiensis]                       | GCA_000281125.4 | TRADD-N |
| XP_006268229.2 | TRADD_N+Death | 304 | TRADD       | vertebrata | Alligator mississippiensis | PREDICTED: tumor necrosis factor receptor type 1-associated DEATH domain protein [Alligator mississippiensis]            | GCF_000281125.3 | TRADD-N |
| XP_006019109.1 | TRADD_N+Death | 304 | B3GNT9      | vertebrata | Alligator sinensis         | UDP-GlcNAc:betaGal beta-1,3-N-acetylglucosaminyltransferase 9 isoform X2 [Alligator sinensis]                            | GCF_000455745.1 | TRADD-N |
| KQK84207.1     | TRADD_N+Death | 304 | AAES_51189  | vertebrata | Amazona aestiva            | Tumor necrosis factor receptor type 1-associated DEATH domain protein [Amazona aestiva]                                  | GCA_001420675.1 | TRADD-N |
| EOA96918.1     | TRADD_N+Death | 303 | Anapl_06541 | vertebrata | Anas platyrhynchos         | Tumor necrosis factor receptor type 1-associated DEATH domain protein, partial [Anas platyrhynchos]                      | GCA_000355885.1 | TRADD-N |
| XP_027322284.1 | TRADD_N+Death | 429 | TRADD       | vertebrata | Anas platyrhynchos         | tumor necrosis factor receptor type 1-associated DEATH domain protein isoform X1 [Anas platyrhynchos]                    | GCF_003850225.1 | TRADD-N |
| XP_027322285.1 | TRADD_N+Death | 303 | TRADD       | vertebrata | Anas platyrhynchos         | tumor necrosis factor receptor type 1-associated DEATH domain protein isoform X2 [Anas platyrhynchos]                    | GCF_003850225.1 | TRADD-N |
| XP_008109942.1 | TRADD_N+Death | 327 | tradd       | vertebrata | Anolis carolinensis        | PREDICTED: tumor necrosis factor receptor type 1-associated DEATH domain protein [Anolis carolinensis]                   | GCF_000090745.1 | TRADD-N |
| XP_013047861.1 | TRADD_N+Death | 303 | TRADD       | vertebrata | Anser cygnoides domesticus | PREDICTED: tumor necrosis factor receptor type 1-associated DEATH domain protein isoform X1 [Anser cygnoides domesticus] | GCF_000971095.1 | TRADD-N |
| XP_013047863.1 | TRADD_N+Death | 265 | TRADD       | vertebrata | Anser cygnoides domesticus | PREDICTED: tumor necrosis factor receptor type 1-associated DEATH domain protein isoform X2 [Anser cygnoides domesticus] | GCF_000971095.1 | TRADD-N |
| KFZ52403.1     | TRADD_N+Death | 307 | N321_09123  | vertebrata | Antrostomus carolinensis   | Tumor necrosis factor receptor type 1-associated DEATH domain protein, partial [Antrostomus carolinensis]                | GCA_000700745.1 | TRADD-N |

| acc            | architecture  | len | gen.name   | taxend     | species                                    | define                                                                                                                                     | gca             | clade   |
|----------------|---------------|-----|------------|------------|--------------------------------------------|--------------------------------------------------------------------------------------------------------------------------------------------|-----------------|---------|
| XP_010176330.1 | TRADD_N+Death | 306 | TRADD      | vertebrata | <i>Antrostomus carolinensis</i>            | PREDICTED: tumor necrosis factor receptor type 1-associated DEATH domain protein [ <i>Antrostomus carolinensis</i> ]                       | GCF_000700745.1 | TRADD-N |
| XP_012323680.1 | TRADD_N+Death | 350 | TRADD      | vertebrata | <i>Aotus nancymaae</i>                     | tumor necrosis factor receptor type 1-associated DEATH domain protein isoform X1 [ <i>Aotus nancymaae</i> ]                                | GCF_000952055.2 | TRADD-N |
| XP_012323681.1 | TRADD_N+Death | 312 | TRADD      | vertebrata | <i>Aotus nancymaae</i>                     | tumor necrosis factor receptor type 1-associated DEATH domain protein isoform X2 [ <i>Aotus nancymaae</i> ]                                | GCF_000952055.2 | TRADD-N |
| KFP90336.1     | TRADD_N+Death | 307 | N311_08319 | vertebrata | <i>Apaloderma vittatum</i>                 | Tumor necrosis factor receptor type 1-associated DEATH domain protein, partial [ <i>Apaloderma vittatum</i> ]                              | GCA_000703405.1 | TRADD-N |
| XP_009870638.1 | TRADD_N+Death | 306 | TRADD      | vertebrata | <i>Apaloderma vittatum</i>                 | PREDICTED: tumor necrosis factor receptor type 1-associated DEATH domain protein [ <i>Apaloderma vittatum</i> ]                            | GCF_000703405.1 | TRADD-N |
| KFM05840.1     | TRADD_N+Death | 307 | AS27_09169 | vertebrata | <i>Aptenodytes forsteri</i>                | Tumor necrosis factor receptor type 1-associated DEATH domain protein, partial [ <i>Aptenodytes forsteri</i> ]                             | GCA_000699145.1 | TRADD-N |
| XP_009275028.1 | TRADD_N+Death | 306 | TRADD      | vertebrata | <i>Aptenodytes forsteri</i>                | PREDICTED: tumor necrosis factor receptor type 1-associated DEATH domain protein [ <i>Aptenodytes forsteri</i> ]                           | GCF_000699145.1 | TRADD-N |
| XP_013796480.1 | TRADD_N+Death | 307 | TRADD      | vertebrata | <i>Apteryx australis mantelli</i>          | PREDICTED: tumor necrosis factor receptor type 1-associated DEATH domain protein [ <i>Apteryx australis mantelli</i> ]                     | GCF_001039765.1 | TRADD-N |
| XP_025943956.1 | TRADD_N+Death | 314 | TRADD      | vertebrata | <i>Apteryx rowi</i>                        | tumor necrosis factor receptor type 1-associated DEATH domain protein [ <i>Apteryx rowi</i> ]                                              | GCF_003343035.1 | TRADD-N |
| XP_011572262.1 | TRADD_N+Death | 306 | TRADD      | vertebrata | <i>Aquila chrysaetos canadensis</i>        | PREDICTED: tumor necrosis factor receptor type 1-associated DEATH domain protein [ <i>Aquila chrysaetos canadensis</i> ]                   | GCF_000766835.1 | TRADD-N |
| XP_026712680.1 | TRADD_N+Death | 306 | TRADD      | vertebrata | <i>Athene cunicularia</i>                  | tumor necrosis factor receptor type 1-associated DEATH domain protein [ <i>Athene cunicularia</i> ]                                        | GCF_003259725.1 | TRADD-N |
| XP_007198138.1 | TRADD_N+Death | 343 | TRADD      | vertebrata | <i>Balaenoptera acutorostrata scammoni</i> | PREDICTED: tumor necrosis factor receptor type 1-associated DEATH domain protein isoform X1 [ <i>Balaenoptera acutorostrata scammoni</i> ] | GCF_000493695.1 | TRADD-N |
| XP_007198139.1 | TRADD_N+Death | 325 | TRADD      | vertebrata | <i>Balaenoptera acutorostrata scammoni</i> | PREDICTED: tumor necrosis factor receptor type 1-associated DEATH domain protein isoform X2 [ <i>Balaenoptera acutorostrata scammoni</i> ] | GCF_000493695.1 | TRADD-N |

| acc            | architecture  | len | gen.name     | taxend     | species                             | define                                                                                                                            | gca             | clade   |
|----------------|---------------|-----|--------------|------------|-------------------------------------|-----------------------------------------------------------------------------------------------------------------------------------|-----------------|---------|
| XP_007198140.1 | TRADD_N+Death | 315 | TRADD        | vertebrata | Balaenoptera acutorostrata scammoni | PREDICTED: tumor necrosis factor receptor type 1-associated DEATH domain protein isoform X3 [Balaenoptera acutorostrata scammoni] | GCF_000493695.1 | TRADD-N |
| KFO08106.1     | TRADD_N+Death | 307 | N312_06144   | vertebrata | Balearica regulorum gibbericeps     | Tumor necrosis factor receptor type 1-associated DEATH domain protein, partial [Balearica regulorum gibbericeps]                  | GCA_000709895.1 | TRADD-N |
| XP_010311259.1 | TRADD_N+Death | 306 | TRADD        | vertebrata | Balearica regulorum gibbericeps     | PREDICTED: tumor necrosis factor receptor type 1-associated DEATH domain protein [Balearica regulorum gibbericeps]                | GCF_000709895.1 | TRADD-N |
| POI29546.1     | TRADD_N+Death | 307 | CIB84_006704 | vertebrata | Bambusicola thoracicus              | hypothetical protein CIB84_006704, partial [Bambusicola thoracicus]                                                               | GCA_002909625.1 | TRADD-N |
| XP_010849371.1 | TRADD_N+Death | 312 | TRADD        | vertebrata | Bison bison bison                   | PREDICTED: tumor necrosis factor receptor type 1-associated DEATH domain protein [Bison bison bison]                              | GCF_000754665.1 | TRADD-N |
| XP_019834938.1 | TRADD_N+Death | 321 | TRADD        | vertebrata | Bos indicus                         | PREDICTED: tumor necrosis factor receptor type 1-associated DEATH domain protein isoform X1 [Bos indicus]                         | GCF_000247795.1 | TRADD-N |
| ELR55836.1     | TRADD_N+Death | 310 | M91_18288    | vertebrata | Bos mutus                           | Tumor necrosis factor receptor type 1-associated DEATH domain protein [Bos mutus]                                                 | GCA_000298355.1 | TRADD-N |
| XP_005896623.1 | TRADD_N+Death | 312 | TRADD        | vertebrata | Bos mutus                           | PREDICTED: tumor necrosis factor receptor type 1-associated DEATH domain protein [Bos mutus]                                      | GCF_000298355.1 | TRADD-N |
| NP_001039361.1 | TRADD_N+Death | 312 | TRADD        | vertebrata | Bos taurus                          | tumor necrosis factor receptor type 1-associated DEATH domain protein [Bos taurus]                                                | GCF_002263795.1 | TRADD-N |
| XP_010812733.1 | TRADD_N+Death | 252 | TRADD        | vertebrata | Bos taurus                          | tumor necrosis factor receptor type 1-associated DEATH domain protein isoform X3 [Bos taurus]                                     | GCF_002263795.1 | TRADD-N |
| XP_006072131.1 | TRADD_N+Death | 312 | TRADD        | vertebrata | Bubalus bubalis                     | tumor necrosis factor receptor type 1-associated DEATH domain protein [Bubalus bubalis]                                           | GCF_003121395.1 | TRADD-N |
| KFO87319.1     | TRADD_N+Death | 307 | N320_08560   | vertebrata | Buceros rhinoceros silvestris       | Tumor necrosis factor receptor type 1-associated DEATH domain protein, partial [Buceros rhinoceros silvestris]                    | GCA_000710305.1 | TRADD-N |
| XP_010130518.1 | TRADD_N+Death | 306 | TRADD        | vertebrata | Buceros rhinoceros silvestris       | PREDICTED: tumor necrosis factor receptor type 1-associated DEATH domain protein [Buceros rhinoceros silvestris]                  | GCF_000710305.1 | TRADD-N |
| XP_014812854.1 | TRADD_N+Death | 306 | TRADD        | vertebrata | Calidris pugnax                     | PREDICTED: tumor necrosis factor receptor type 1-associated DEATH domain protein [Calidris pugnax]                                | GCF_001431845.1 | TRADD-N |
| OXB57886.1     | TRADD_N+Death | 311 | ASZ78_009492 | vertebrata | Callipepla squamata                 | hypothetical protein ASZ78_009492 [Callipepla squamata]                                                                           | GCA_002218305.1 | TRADD-N |



| acc            | architecture  | len | gen.name      | taxend     | species                | define                                                                                                                      | gca             | clade   |
|----------------|---------------|-----|---------------|------------|------------------------|-----------------------------------------------------------------------------------------------------------------------------|-----------------|---------|
| XP_008984275.1 | TRADD_N+Death | 312 | TRADD         | vertebrata | Callithrix jacchus     | PREDICTED: tumor necrosis factor receptor type 1-associated DEATH domain protein isoform X3 [Callithrix jacchus]            | GCF_000004665.1 | TRADD-N |
| XP_017822392.1 | TRADD_N+Death | 363 | TRADD         | vertebrata | Callithrix jacchus     | PREDICTED: tumor necrosis factor receptor type 1-associated DEATH domain protein isoform X1 [Callithrix jacchus]            | GCF_000004665.1 | TRADD-N |
| XP_017822393.1 | TRADD_N+Death | 350 | TRADD         | vertebrata | Callithrix jacchus     | PREDICTED: tumor necrosis factor receptor type 1-associated DEATH domain protein isoform X2 [Callithrix jacchus]            | GCF_000004665.1 | TRADD-N |
| XP_007902885.1 | TRADD_N+Death | 310 | tradd         | vertebrata | Callorhinchus milii    | PREDICTED: tumor necrosis factor receptor type 1-associated DEATH domain protein [Callorhinchus milii]                      | GCF_000165045.1 | TRADD-N |
| XP_025744570.1 | TRADD_N+Death | 313 | TRADD         | vertebrata | Callorhinus ursinus    | tumor necrosis factor receptor type 1-associated DEATH domain protein [Callorhinus ursinus]                                 | GCF_003265705.1 | TRADD-N |
| KFO99994.1     | TRADD_N+Death | 307 | N300_11603    | vertebrata | Calypte anna           | Tumor necrosis factor receptor type 1-associated DEATH domain protein, partial [Calypte anna]                               | GCA_000699085.1 | TRADD-N |
| XP_008490893.1 | TRADD_N+Death | 306 | TRADD         | vertebrata | Calypte anna           | PREDICTED: tumor necrosis factor receptor type 1-associated DEATH domain protein [Calypte anna]                             | -               | TRADD-N |
| XP_010960749.1 | TRADD_N+Death | 309 | TRADD         | vertebrata | Camelus bactrianus     | PREDICTED: tumor necrosis factor receptor type 1-associated DEATH domain protein [Camelus bactrianus]                       | GCF_000767855.1 | TRADD-N |
| XP_010977614.1 | TRADD_N+Death | 287 | TRADD         | vertebrata | Camelus dromedarius    | PREDICTED: LOW QUALITY PROTEIN: tumor necrosis factor receptor type 1-associated DEATH domain protein [Camelus dromedarius] | -               | TRADD-N |
| EPY84220.1     | TRADD_N+Death | 271 | CB1_000490069 | vertebrata | Camelus ferus          | TNFRSF1A-associated via death domain isoform 1-like protein [Camelus ferus]                                                 | GCA_000311805.2 | TRADD-N |
| XP_006180698.1 | TRADD_N+Death | 330 | TRADD         | vertebrata | Camelus ferus          | PREDICTED: tumor necrosis factor receptor type 1-associated DEATH domain protein isoform X1 [Camelus ferus]                 | GCF_000311805.1 | TRADD-N |
| XP_014411308.1 | TRADD_N+Death | 315 | TRADD         | vertebrata | Camelus ferus          | PREDICTED: tumor necrosis factor receptor type 1-associated DEATH domain protein isoform X2 [Camelus ferus]                 | GCF_000311805.1 | TRADD-N |
| XP_005620913.1 | TRADD_N+Death | 323 | TRADD         | vertebrata | Canis lupus familiaris | tumor necrosis factor receptor type 1-associated DEATH domain protein isoform X2 [Canis lupus familiaris]                   | GCF_000002285.3 | TRADD-N |
| XP_013969589.1 | TRADD_N+Death | 340 | TRADD         | vertebrata | Canis lupus familiaris | tumor necrosis factor receptor type 1-associated DEATH domain protein isoform X1 [Canis lupus familiaris]                   | GCF_000002285.3 | TRADD-N |
| XP_022275094.1 | TRADD_N+Death | 252 | TRADD         | vertebrata | Canis lupus familiaris | tumor necrosis factor receptor type 1-associated DEATH domain protein isoform X4 [Canis lupus familiaris]                   | GCF_000002285.3 | TRADD-N |

| acc            | architecture  | len | gen.name   | taxend     | species                  | define                                                                                                                 | gca             | clade   |
|----------------|---------------|-----|------------|------------|--------------------------|------------------------------------------------------------------------------------------------------------------------|-----------------|---------|
| XP_853998.2    | TRADD_N+Death | 312 | TRADD      | vertebrata | Canis lupus familiaris   | tumor necrosis factor receptor type 1-associated DEATH domain protein isoform X3 [Canis lupus familiaris]              | GCF_000002285.3 | TRADD-N |
| XP_005692184.2 | TRADD_N+Death | 312 | TRADD      | vertebrata | Capra hircus             | PREDICTED: tumor necrosis factor receptor type 1-associated DEATH domain protein isoform X1 [Capra hircus]             | GCF_001704415.1 | TRADD-N |
| XP_017917599.1 | TRADD_N+Death | 252 | TRADD      | vertebrata | Capra hircus             | PREDICTED: tumor necrosis factor receptor type 1-associated DEATH domain protein isoform X2 [Capra hircus]             | GCF_001704415.1 | TRADD-N |
| KFP67735.1     | TRADD_N+Death | 307 | N322_00821 | vertebrata | Cariama cristata         | Tumor necrosis factor receptor type 1-associated DEATH domain protein, partial [Cariama cristata]                      | GCA_000690535.1 | TRADD-N |
| XP_009703964.1 | TRADD_N+Death | 306 | TRADD      | vertebrata | Cariama cristata         | PREDICTED: tumor necrosis factor receptor type 1-associated DEATH domain protein [Cariama cristata]                    | GCF_000690535.1 | TRADD-N |
| XP_008065007.1 | TRADD_N+Death | 310 | TRADD      | vertebrata | Carlito syrichta         | tumor necrosis factor receptor type 1-associated DEATH domain protein isoform X2 [Carlito syrichta]                    | GCF_000164805.1 | TRADD-N |
| XP_021572269.1 | TRADD_N+Death | 337 | TRADD      | vertebrata | Carlito syrichta         | tumor necrosis factor receptor type 1-associated DEATH domain protein isoform X1 [Carlito syrichta]                    | GCF_000164805.1 | TRADD-N |
| XP_020031343.1 | TRADD_N+Death | 389 | Tradd      | vertebrata | Castor canadensis        | tumor necrosis factor receptor type 1-associated DEATH domain protein isoform X1 [Castor canadensis]                   | GCF_001984765.1 | TRADD-N |
| XP_020031352.1 | TRADD_N+Death | 321 | Tradd      | vertebrata | Castor canadensis        | tumor necrosis factor receptor type 1-associated DEATH domain protein isoform X2 [Castor canadensis]                   | GCF_001984765.1 | TRADD-N |
| XP_020031362.1 | TRADD_N+Death | 310 | Tradd      | vertebrata | Castor canadensis        | tumor necrosis factor receptor type 1-associated DEATH domain protein isoform X3 [Castor canadensis]                   | GCF_001984765.1 | TRADD-N |
| KFP50879.1     | TRADD_N+Death | 300 | N323_05948 | vertebrata | Cathartes aura           | Tumor necrosis factor receptor type 1-associated DEATH domain protein, partial [Cathartes aura]                        | GCA_000699945.1 | TRADD-N |
| XP_005004714.1 | TRADD_N+Death | 310 | Tradd      | vertebrata | Cavia porcellus          | tumor necrosis factor receptor type 1-associated DEATH domain protein [Cavia porcellus]                                | GCF_000151735.1 | TRADD-N |
| XP_017394762.1 | TRADD_N+Death | 352 | TRADD      | vertebrata | Cebus capucinus imitator | PREDICTED: tumor necrosis factor receptor type 1-associated DEATH domain protein isoform X1 [Cebus capucinus imitator] | GCF_001604975.1 | TRADD-N |
| XP_017394763.1 | TRADD_N+Death | 350 | TRADD      | vertebrata | Cebus capucinus imitator | PREDICTED: tumor necrosis factor receptor type 1-associated DEATH domain protein isoform X2 [Cebus capucinus imitator] | GCF_001604975.1 | TRADD-N |
| XP_017394764.1 | TRADD_N+Death | 312 | TRADD      | vertebrata | Cebus capucinus imitator | PREDICTED: tumor necrosis factor receptor type 1-associated DEATH domain protein isoform X3 [Cebus capucinus imitator] | GCF_001604975.1 | TRADD-N |

| acc            | architecture  | len | gen.name          | taxend     | species                    | define                                                                                                                  | gca             | clade   |
|----------------|---------------|-----|-------------------|------------|----------------------------|-------------------------------------------------------------------------------------------------------------------------|-----------------|---------|
| XP_004431761.1 | TRADD_N+Death | 307 | LOC101408131      | vertebrata | Ceratotherium simum simum  | PREDICTED: tumor necrosis factor receptor type 1-associated DEATH domain protein isoform X2 [Ceratotherium simum simum] | GCF_000283155.1 | TRADD-N |
| XP_014643936.1 | TRADD_N+Death | 452 | LOC101408131      | vertebrata | Ceratotherium simum simum  | PREDICTED: tumor necrosis factor receptor type 1-associated DEATH domain protein isoform X1 [Ceratotherium simum simum] | GCF_000283155.1 | TRADD-N |
| XP_011918730.1 | TRADD_N+Death | 308 | TRADD             | vertebrata | Cercocebus atys            | PREDICTED: tumor necrosis factor receptor type 1-associated DEATH domain protein isoform X1 [Cercocebus atys]           | GCF_000955945.1 | TRADD-N |
| XP_011918740.1 | TRADD_N+Death | 248 | TRADD             | vertebrata | Cercocebus atys            | PREDICTED: tumor necrosis factor receptor type 1-associated DEATH domain protein isoform X2 [Cercocebus atys]           | GCF_000955945.1 | TRADD-N |
| OWK16244.1     | TRADD_N+Death | 312 | Celaphus_00004220 | vertebrata | Cervus elaphus hippelaphus | TRADD [Cervus elaphus hippelaphus]                                                                                      | GCA_002197005.1 | TRADD-N |
| KFU94762.1     | TRADD_N+Death | 307 | M959_10139        | vertebrata | Chaetura pelagica          | Tumor necrosis factor receptor type 1-associated DEATH domain protein, partial [Chaetura pelagica]                      | GCA_000747805.1 | TRADD-N |
| XP_010002736.1 | TRADD_N+Death | 306 | TRADD             | vertebrata | Chaetura pelagica          | PREDICTED: tumor necrosis factor receptor type 1-associated DEATH domain protein [Chaetura pelagica]                    | GCF_000747805.1 | TRADD-N |
| KGL86877.1     | TRADD_N+Death | 307 | N301_00711        | vertebrata | Charadrius vociferus       | Tumor necrosis factor receptor type 1-associated DEATH domain protein, partial [Charadrius vociferus]                   | GCA_000708025.2 | TRADD-N |
| XP_009887790.1 | TRADD_N+Death | 306 | TRADD             | vertebrata | Charadrius vociferus       | PREDICTED: tumor necrosis factor receptor type 1-associated DEATH domain protein [Charadrius vociferus]                 | GCF_000708025.1 | TRADD-N |
| EMP41239.1     | TRADD_N+Death | 307 | UY3_01474         | vertebrata | Chelonia mydas             | Tumor necrosis factor receptor type 1-associated DEATH domain protein [Chelonia mydas]                                  | GCA_000344595.1 | TRADD-N |
| XP_007054032.1 | TRADD_N+Death | 277 | TRADD             | vertebrata | Chelonia mydas             | PREDICTED: tumor necrosis factor receptor type 1-associated DEATH domain protein [Chelonia mydas]                       | -               | TRADD-N |
| XP_005403749.1 | TRADD_N+Death | 310 | Tradd             | vertebrata | Chinchilla lanigera        | PREDICTED: tumor necrosis factor receptor type 1-associated DEATH domain protein [Chinchilla lanigera]                  | GCF_000276665.1 | TRADD-N |
| KFP44634.1     | TRADD_N+Death | 307 | N324_05185        | vertebrata | Chlamydotis macqueenii     | Tumor necrosis factor receptor type 1-associated DEATH domain protein, partial [Chlamydotis macqueenii]                 | GCA_000695195.1 | TRADD-N |
| XP_010124279.1 | TRADD_N+Death | 306 | TRADD             | vertebrata | Chlamydotis macqueenii     | PREDICTED: tumor necrosis factor receptor type 1-associated DEATH domain protein [Chlamydotis macqueenii]               | GCF_000695195.1 | TRADD-N |

| acc            | architecture  | len | gen.name    | taxend     | species                      | define                                                                                                            | gca             | clade   |
|----------------|---------------|-----|-------------|------------|------------------------------|-------------------------------------------------------------------------------------------------------------------|-----------------|---------|
| XP_007992208.1 | TRADD_N+Death | 366 | TRADD       | vertebrata | Chlorocebus sabaues          | PREDICTED: tumor necrosis factor receptor type 1-associated DEATH domain protein isoform X1 [Chlorocebus sabaues] | GCF_000409795.2 | TRADD-N |
| XP_007992209.1 | TRADD_N+Death | 308 | TRADD       | vertebrata | Chlorocebus sabaues          | PREDICTED: tumor necrosis factor receptor type 1-associated DEATH domain protein isoform X2 [Chlorocebus sabaues] | GCF_000409795.2 | TRADD-N |
| XP_007992210.1 | TRADD_N+Death | 248 | TRADD       | vertebrata | Chlorocebus sabaues          | PREDICTED: tumor necrosis factor receptor type 1-associated DEATH domain protein isoform X3 [Chlorocebus sabaues] | GCF_000409795.2 | TRADD-N |
| XP_008165123.1 | TRADD_N+Death | 307 | TRADD       | vertebrata | Chrysemys picta bellii       | tumor necrosis factor receptor type 1-associated DEATH domain protein [Chrysemys picta bellii]                    | GCF_000241765.3 | TRADD-N |
| XP_006863702.1 | TRADD_N+Death | 309 | TRADD       | vertebrata | Chrysochloris asiatica       | PREDICTED: tumor necrosis factor receptor type 1-associated DEATH domain protein [Chrysochloris asiatica]         | GCF_000296735.1 | TRADD-N |
| OXB72455.1     | TRADD_N+Death | 307 | H355_007808 | vertebrata | Colinus virginianus          | hypothetical protein H355_007808, partial [Colinus virginianus]                                                   | GCA_000599465.2 | TRADD-N |
| KFP26363.1     | TRADD_N+Death | 307 | N325_10356  | vertebrata | Colius striatus              | Tumor necrosis factor receptor type 1-associated DEATH domain protein, partial [Colius striatus]                  | GCA_000690715.1 | TRADD-N |
| XP_010203006.1 | TRADD_N+Death | 306 | TRADD       | vertebrata | Colius striatus              | PREDICTED: tumor necrosis factor receptor type 1-associated DEATH domain protein [Colius striatus]                | GCF_000690715.1 | TRADD-N |
| XP_011787468.1 | TRADD_N+Death | 346 | TRADD       | vertebrata | Colobus angolensis palliatus | PREDICTED: tumor necrosis factor receptor type 1-associated DEATH domain protein [Colobus angolensis palliatus]   | GCF_000951035.1 | TRADD-N |
| XP_005504824.1 | TRADD_N+Death | 306 | TRADD       | vertebrata | Columba livia                | tumor necrosis factor receptor type 1-associated DEATH domain protein [Columba livia]                             | GCF_000337935.1 | TRADD-N |
| XP_004690544.1 | TRADD_N+Death | 306 | TRADD       | vertebrata | Condylura cristata           | PREDICTED: tumor necrosis factor receptor type 1-associated DEATH domain protein [Condylura cristata]             | GCF_000260355.1 | TRADD-N |
| KFO63108.1     | TRADD_N+Death | 302 | N302_07036  | vertebrata | Corvus brachyrhynchos        | Tumor necrosis factor receptor type 1-associated DEATH domain protein, partial [Corvus brachyrhynchos]            | GCA_000691975.1 | TRADD-N |
| XP_008636989.1 | TRADD_N+Death | 301 | TRADD       | vertebrata | Corvus brachyrhynchos        | PREDICTED: tumor necrosis factor receptor type 1-associated DEATH domain protein [Corvus brachyrhynchos]          | GCF_000691975.1 | TRADD-N |
| XP_010394933.2 | TRADD_N+Death | 301 | TRADD       | vertebrata | Corvus cornix cornix         | tumor necrosis factor receptor type 1-associated DEATH domain protein [Corvus cornix cornix]                      | GCF_000738735.2 | TRADD-N |
| XP_015729060.1 | TRADD_N+Death | 304 | TRADD       | vertebrata | Coturnix japonica            | PREDICTED: tumor necrosis factor receptor type 1-associated DEATH domain protein [Coturnix japonica]              | GCF_001577835.1 | TRADD-N |

| acc            | architecture  | len | gen.name     | taxend     | species                  | define                                                                                                   | gca             | clade   |
|----------------|---------------|-----|--------------|------------|--------------------------|----------------------------------------------------------------------------------------------------------|-----------------|---------|
| EGV97026.1     | TRADD_N+Death | 306 | I79_016510   | vertebrata | Cricetulus griseus       | Tumor necrosis factor receptor type 1-associated DEATH domain protein [Cricetulus griseus]               | GCA_000223135.1 | TRADD-N |
| XP_007647347.1 | TRADD_N+Death | 310 | Tradd        | vertebrata | Cricetulus griseus       | tumor necrosis factor receptor type 1-associated DEATH domain protein [Cricetulus griseus]               | GCF_000223135.1 | TRADD-N |
| XP_019391196.1 | TRADD_N+Death | 304 | TRADD        | vertebrata | Crocodylus porosus       | PREDICTED: tumor necrosis factor receptor type 1-associated DEATH domain protein [Crocodylus porosus]    | GCF_001723895.1 | TRADD-N |
| XP_009555419.1 | TRADD_N+Death | 306 | TRADD        | vertebrata | Cuculus canorus          | PREDICTED: tumor necrosis factor receptor type 1-associated DEATH domain protein [Cuculus canorus]       | GCF_000709325.1 | TRADD-N |
| XP_023790487.1 | TRADD_N+Death | 357 | TRADD        | vertebrata | Cyanistes caeruleus      | tumor necrosis factor receptor type 1-associated DEATH domain protein [Cyanistes caeruleus]              | GCF_002901205.1 | TRADD-N |
| XP_004460942.1 | TRADD_N+Death | 315 | TRADD        | vertebrata | Dasypus novemcinctus     | tumor necrosis factor receptor type 1-associated DEATH domain protein [Dasypus novemcinctus]             | GCF_000208655.1 | TRADD-N |
| XP_022439217.1 | TRADD_N+Death | 315 | TRADD        | vertebrata | Delphinapterus leucas    | tumor necrosis factor receptor type 1-associated DEATH domain protein [Delphinapterus leucas]            | GCF_002288925.2 | TRADD-N |
| XP_024411986.1 | TRADD_N+Death | 319 | TRADD        | vertebrata | Desmodus rotundus        | tumor necrosis factor receptor type 1-associated DEATH domain protein isoform X1 [Desmodus rotundus]     | GCF_002940915.1 | TRADD-N |
| XP_024411987.1 | TRADD_N+Death | 310 | TRADD        | vertebrata | Desmodus rotundus        | tumor necrosis factor receptor type 1-associated DEATH domain protein isoform X2 [Desmodus rotundus]     | GCF_002940915.1 | TRADD-N |
| XP_012868461.1 | TRADD_N+Death | 309 | Tradd        | vertebrata | Dipodomys ordii          | PREDICTED: tumor necrosis factor receptor type 1-associated DEATH domain protein [Dipodomys ordii]       | GCF_000151885.1 | TRADD-N |
| XP_025957849.1 | TRADD_N+Death | 305 | TRADD        | vertebrata | Dromaius novaehollandiae | tumor necrosis factor receptor type 1-associated DEATH domain protein [Dromaius novaehollandiae]         | GCF_003342905.1 | TRADD-N |
| XP_004704900.1 | TRADD_N+Death | 307 | TRADD        | vertebrata | Echinops telfairi        | PREDICTED: tumor necrosis factor receptor type 1-associated DEATH domain protein [Echinops telfairi]     | GCF_000313985.2 | TRADD-N |
| KFP19624.1     | TRADD_N+Death | 307 | Z169_06047   | vertebrata | Egretta garzetta         | Tumor necrosis factor receptor type 1-associated DEATH domain protein, partial [Egretta garzetta]        | GCA_000687185.1 | TRADD-N |
| XP_009641600.1 | TRADD_N+Death | 306 | TRADD        | vertebrata | Egretta garzetta         | PREDICTED: tumor necrosis factor receptor type 1-associated DEATH domain protein [Egretta garzetta]      | GCF_000687185.1 | TRADD-N |
| XP_006878963.1 | TRADD_N+Death | 310 | TRADD        | vertebrata | Elephantulus edwardii    | PREDICTED: tumor necrosis factor receptor type 1-associated DEATH domain protein [Elephantulus edwardii] | GCF_000299155.1 | TRADD-N |
| XP_022367209.1 | TRADD_N+Death | 314 | LOC111152832 | vertebrata | Enhydra lutris kenyonii  | tumor necrosis factor receptor type 1-associated DEATH domain protein [Enhydra lutris kenyonii]          | GCF_002288905.1 | TRADD-N |
| XP_008138113.1 | TRADD_N+Death | 310 | TRADD        | vertebrata | Eptesicus fuscus         | PREDICTED: tumor necrosis factor receptor type 1-associated DEATH domain protein [Eptesicus fuscus]      | GCF_000308155.1 | TRADD-N |

| acc            | architecture  | len | gen.name       | taxend     | species             | define                                                                                                            | gca             | clade   |
|----------------|---------------|-----|----------------|------------|---------------------|-------------------------------------------------------------------------------------------------------------------|-----------------|---------|
| XP_014683141.1 | TRADD_N+Death | 312 | TRADD          | vertebrata | Equus asinus        | PREDICTED: tumor necrosis factor receptor type 1-associated DEATH domain protein [Equus asinus]                   | GCF_001305755.1 | TRADD-N |
| XP_023494393.1 | TRADD_N+Death | 312 | TRADD          | vertebrata | Equus caballus      | tumor necrosis factor receptor type 1-associated DEATH domain protein isoform X1 [Equus caballus]                 | GCF_002863925.1 | TRADD-N |
| XP_023494396.1 | TRADD_N+Death | 252 | TRADD          | vertebrata | Equus caballus      | tumor necrosis factor receptor type 1-associated DEATH domain protein isoform X2 [Equus caballus]                 | GCF_002863925.1 | TRADD-N |
| XP_008507841.1 | TRADD_N+Death | 276 | TRADD          | vertebrata | Equus przewalskii   | PREDICTED: tumor necrosis factor receptor type 1-associated DEATH domain protein [Equus przewalskii]              | GCF_000696695.1 | TRADD-N |
| XP_007517809.2 | TRADD_N+Death | 314 | TRADD          | vertebrata | Erinaceus europaeus | PREDICTED: tumor necrosis factor receptor type 1-associated DEATH domain protein isoform X2 [Erinaceus europaeus] | GCF_000296755.1 | TRADD-N |
| XP_016041350.1 | TRADD_N+Death | 332 | TRADD          | vertebrata | Erinaceus europaeus | PREDICTED: tumor necrosis factor receptor type 1-associated DEATH domain protein isoform X1 [Erinaceus europaeus] | GCF_000296755.1 | TRADD-N |
| RLW01327.1     | TRADD_N+Death | 306 | DV515_00008217 | vertebrata | Erythrura gouldiae  | hypothetical protein DV515_00008217 [Erythrura gouldiae]                                                          | GCA_003676055.1 | TRADD-N |
| KFV92737.1     | TRADD_N+Death | 307 | N326_03667     | vertebrata | Eurypyga helias     | Tumor necrosis factor receptor type 1-associated DEATH domain protein, partial [Eurypyga helias]                  | GCA_000690775.1 | TRADD-N |
| XP_010148912.1 | TRADD_N+Death | 306 | TRADD          | vertebrata | Eurypyga helias     | PREDICTED: tumor necrosis factor receptor type 1-associated DEATH domain protein [Eurypyga helias]                | GCF_000690775.1 | TRADD-N |
| XP_005233540.1 | TRADD_N+Death | 306 | TRADD          | vertebrata | Falco peregrinus    | PREDICTED: tumor necrosis factor receptor type 1-associated DEATH domain protein [Falco peregrinus]               | GCF_000337955.1 | TRADD-N |
| XP_003998167.1 | TRADD_N+Death | 311 | TRADD          | vertebrata | Felis catus         | tumor necrosis factor receptor type 1-associated DEATH domain protein isoform X2 [Felis catus]                    | GCF_000181335.3 | TRADD-N |
| XP_019675452.1 | TRADD_N+Death | 319 | TRADD          | vertebrata | Felis catus         | tumor necrosis factor receptor type 1-associated DEATH domain protein isoform X1 [Felis catus]                    | GCF_000181335.3 | TRADD-N |
| XP_005052598.1 | TRADD_N+Death | 306 | TRADD          | vertebrata | Ficedula albicollis | PREDICTED: tumor necrosis factor receptor type 1-associated DEATH domain protein [Ficedula albicollis]            | GCF_000247815.1 | TRADD-N |
| XP_010610494.1 | TRADD_N+Death | 320 | Tradd          | vertebrata | Fukomys damarensis  | PREDICTED: tumor necrosis factor receptor type 1-associated DEATH domain protein isoform X1 [Fukomys damarensis]  | GCF_000743615.1 | TRADD-N |
| XP_010610496.1 | TRADD_N+Death | 310 | Tradd          | vertebrata | Fukomys damarensis  | PREDICTED: tumor necrosis factor receptor type 1-associated DEATH domain protein isoform X2 [Fukomys damarensis]  | GCF_000743615.1 | TRADD-N |
| KFW03688.1     | TRADD_N+Death | 306 | N327_09538     | vertebrata | Fulmarus glacialis  | Tumor necrosis factor receptor type 1-associated DEATH domain protein, partial [Fulmarus glacialis]               | GCA_000690835.1 | TRADD-N |

| acc            | architecture  | len | gen.name   | taxend     | species                 | define                                                                                                                | gca             | clade   |
|----------------|---------------|-----|------------|------------|-------------------------|-----------------------------------------------------------------------------------------------------------------------|-----------------|---------|
| XP_009574714.1 | TRADD_N+Death | 306 | TRADD      | vertebrata | Fulmarus glacialis      | PREDICTED: tumor necrosis factor receptor type 1-associated DEATH domain protein [Fulmarus glacialis]                 | GCF_000690835.1 | TRADD-N |
| XP_008585531.1 | TRADD_N+Death | 326 | TRADD      | vertebrata | Galeopterus variegatus  | PREDICTED: tumor necrosis factor receptor type 1-associated DEATH domain protein isoform X1 [Galeopterus variegatus]  | GCF_000696425.1 | TRADD-N |
| XP_008585532.1 | TRADD_N+Death | 309 | TRADD      | vertebrata | Galeopterus variegatus  | PREDICTED: tumor necrosis factor receptor type 1-associated DEATH domain protein isoform X2 [Galeopterus variegatus]  | GCF_000696425.1 | TRADD-N |
| XP_004944196.2 | TRADD_N+Death | 461 | TRADD      | vertebrata | Gallus gallus           | tumor necrosis factor receptor type 1-associated DEATH domain protein [Gallus gallus]                                 | GCF_000002315.5 | TRADD-N |
| KFV44833.1     | TRADD_N+Death | 307 | N328_11878 | vertebrata | Gavia stellata          | Tumor necrosis factor receptor type 1-associated DEATH domain protein, partial [Gavia stellata]                       | GCA_000690875.1 | TRADD-N |
| XP_009815127.1 | TRADD_N+Death | 306 | TRADD      | vertebrata | Gavia stellata          | PREDICTED: tumor necrosis factor receptor type 1-associated DEATH domain protein [Gavia stellata]                     | GCF_000690875.1 | TRADD-N |
| XP_019361318.1 | TRADD_N+Death | 304 | TRADD      | vertebrata | Gavialis gangeticus     | PREDICTED: tumor necrosis factor receptor type 1-associated DEATH domain protein [Gavialis gangeticus]                | GCF_001723915.1 | TRADD-N |
| XP_015261591.1 | TRADD_N+Death | 310 | TRADD      | vertebrata | Gekko japonicus         | PREDICTED: tumor necrosis factor receptor type 1-associated DEATH domain protein [Gekko japonicus]                    | GCF_001447785.1 | TRADD-N |
| XP_005422791.1 | TRADD_N+Death | 306 | TRADD      | vertebrata | Geospiza fortis         | PREDICTED: tumor necrosis factor receptor type 1-associated DEATH domain protein [Geospiza fortis]                    | GCF_000277835.1 | TRADD-N |
| XP_004057845.1 | TRADD_N+Death | 311 | TRADD      | vertebrata | Gorilla gorilla gorilla | PREDICTED: tumor necrosis factor receptor type 1-associated DEATH domain protein isoform X1 [Gorilla gorilla gorilla] | GCF_008122165.1 | TRADD-N |
| XP_018868334.1 | TRADD_N+Death | 251 | TRADD      | vertebrata | Gorilla gorilla gorilla | PREDICTED: tumor necrosis factor receptor type 1-associated DEATH domain protein isoform X2 [Gorilla gorilla gorilla] | GCF_008122165.1 | TRADD-N |
| KFP94957.1     | TRADD_N+Death | 307 | N329_08562 | vertebrata | Haliaeetus albicilla    | Tumor necrosis factor receptor type 1-associated DEATH domain protein, partial [Haliaeetus albicilla]                 | GCA_000691405.1 | TRADD-N |
| XP_009922991.1 | TRADD_N+Death | 306 | TRADD      | vertebrata | Haliaeetus albicilla    | PREDICTED: tumor necrosis factor receptor type 1-associated DEATH domain protein [Haliaeetus albicilla]               | GCF_000691405.1 | TRADD-N |
| EHB17005.1     | TRADD_N+Death | 310 | GW7_02340  | vertebrata | Heterocephalus glaber   | Tumor necrosis factor receptor type 1-associated DEATH domain protein [Heterocephalus glaber]                         | GCA_000230445.1 | TRADD-N |
| XP_004843120.1 | TRADD_N+Death | 310 | Tradd      | vertebrata | Heterocephalus glaber   | tumor necrosis factor receptor type 1-associated DEATH domain protein [Heterocephalus glaber]                         | GCF_000247695.1 | TRADD-N |

| acc            | architecture  | len | gen.name    | taxend     | species                    | define                                                                                                             | gca              | clade   |
|----------------|---------------|-----|-------------|------------|----------------------------|--------------------------------------------------------------------------------------------------------------------|------------------|---------|
| XP_019511720.1 | TRADD_N+Death | 342 | TRADD       | vertebrata | Hipposideros armiger       | PREDICTED: tumor necrosis factor receptor type 1-associated DEATH domain protein isoform X1 [Hipposideros armiger] | GCF_001890085.1  | TRADD-N |
| XP_019511730.1 | TRADD_N+Death | 309 | TRADD       | vertebrata | Hipposideros armiger       | PREDICTED: tumor necrosis factor receptor type 1-associated DEATH domain protein isoform X2 [Hipposideros armiger] | GCF_001890085.1  | TRADD-N |
| XP_019511759.1 | TRADD_N+Death | 250 | TRADD       | vertebrata | Hipposideros armiger       | PREDICTED: tumor necrosis factor receptor type 1-associated DEATH domain protein isoform X3 [Hipposideros armiger] | GCF_001890085.1  | TRADD-N |
| RMC09132.1     | TRADD_N+Death | 361 | DUI87_14139 | vertebrata | Hirundo rustica rustica    | hypothetical protein DUI87_14139 [Hirundo rustica rustica]                                                         | GCA_003692655.1  | TRADD-N |
| AAA98482.1     | TRADD_N+Death | 328 | TRADD       | vertebrata | Homo sapiens               | tumor necrosis factor receptor type 1 associated protein, partial [Homo sapiens]                                   | -                | TRADD-N |
| NP_003780.1    | TRADD_N+Death | 312 | Hs.89862    | vertebrata | Homo sapiens               | tumor necrosis factor receptor type 1-associated DEATH domain protein [Homo sapiens]                               | GCF_000001405.39 | TRADD-N |
| XP_005256270.1 | TRADD_N+Death | 252 | Hs.89862    | vertebrata | Homo sapiens               | tumor necrosis factor receptor type 1-associated DEATH domain protein isoform X2 [Homo sapiens]                    | GCF_000001405.39 | TRADD-N |
| XP_005318353.2 | TRADD_N+Death | 382 | Tradd       | vertebrata | Ictidomys tridecemlineatus | tumor necrosis factor receptor type 1-associated DEATH domain protein [Ictidomys tridecemlineatus]                 | GCF_000236235.1  | TRADD-N |
| XP_004661772.1 | TRADD_N+Death | 309 | Tradd       | vertebrata | Jaculus jaculus            | PREDICTED: tumor necrosis factor receptor type 1-associated DEATH domain protein [Jaculus jaculus]                 | GCF_000280705.1  | TRADD-N |
| XP_005998087.1 | TRADD_N+Death | 294 | TRADD       | vertebrata | Latimeria chalumnae        | PREDICTED: tumor necrosis factor receptor type 1-associated DEATH domain protein [Latimeria chalumnae]             | GCF_000225785.1  | TRADD-N |
| XP_017679908.1 | TRADD_N+Death | 306 | TRADD       | vertebrata | Lepidothrix coronata       | PREDICTED: tumor necrosis factor receptor type 1-associated DEATH domain protein [Lepidothrix coronata]            | GCF_001604755.1  | TRADD-N |
| XP_006741565.1 | TRADD_N+Death | 312 | TRADD       | vertebrata | Leptonychotes weddellii    | PREDICTED: tumor necrosis factor receptor type 1-associated DEATH domain protein [Leptonychotes weddellii]         | GCF_000349705.1  | TRADD-N |
| KFQ03468.1     | TRADD_N+Death | 307 | N330_09323  | vertebrata | Leptosomus discolor        | Tumor necrosis factor receptor type 1-associated DEATH domain protein, partial [Leptosomus discolor]               | GCA_000691785.1  | TRADD-N |
| XP_009954005.1 | TRADD_N+Death | 306 | TRADD       | vertebrata | Leptosomus discolor        | PREDICTED: tumor necrosis factor receptor type 1-associated DEATH domain protein [Leptosomus discolor]             | GCF_000691785.1  | TRADD-N |
| XP_007457361.1 | TRADD_N+Death | 341 | TRADD       | vertebrata | Lipotes vexillifer         | PREDICTED: tumor necrosis factor receptor type 1-associated DEATH domain protein [Lipotes vexillifer]              | GCF_000442215.1  | TRADD-N |



| acc            | architecture  | len | gen.name   | taxend     | species                    | define                                                                                                            | gca             | clade   |
|----------------|---------------|-----|------------|------------|----------------------------|-------------------------------------------------------------------------------------------------------------------|-----------------|---------|
| OWK54101.1     | TRADD_N+Death | 306 | TRADD      | vertebrata | Lonchura striata domestica | Tumor necrosis factor receptor type 1-associated DEATH domain protein [Lonchura striata domestica]                | GCA_002197715.1 | TRADD-N |
| XP_021390934.1 | TRADD_N+Death | 400 | TRADD      | vertebrata | Lonchura striata domestica | tumor necrosis factor receptor type 1-associated DEATH domain protein [Lonchura striata domestica]                | -               | TRADD-N |
| XP_003417161.1 | TRADD_N+Death | 310 | TRADD      | vertebrata | Loxodonta africana         | tumor necrosis factor receptor type 1-associated DEATH domain protein isoform X4 [Loxodonta africana]             | GCF_000001905.1 | TRADD-N |
| XP_023412319.1 | TRADD_N+Death | 351 | TRADD      | vertebrata | Loxodonta africana         | tumor necrosis factor receptor type 1-associated DEATH domain protein isoform X1 [Loxodonta africana]             | GCF_000001905.1 | TRADD-N |
| XP_023412320.1 | TRADD_N+Death | 328 | TRADD      | vertebrata | Loxodonta africana         | tumor necrosis factor receptor type 1-associated DEATH domain protein isoform X2 [Loxodonta africana]             | GCF_000001905.1 | TRADD-N |
| XP_023412321.1 | TRADD_N+Death | 318 | TRADD      | vertebrata | Loxodonta africana         | tumor necrosis factor receptor type 1-associated DEATH domain protein isoform X3 [Loxodonta africana]             | GCF_000001905.1 | TRADD-N |
| EHH60464.1     | TRADD_N+Death | 308 | EGM_11831  | vertebrata | Macaca fascicularis        | Tumor necrosis factor receptor type 1-associated DEATH domain protein [Macaca fascicularis]                       | GCA_000230815.1 | TRADD-N |
| XP_005592259.1 | TRADD_N+Death | 308 | TRADD      | vertebrata | Macaca fascicularis        | PREDICTED: tumor necrosis factor receptor type 1-associated DEATH domain protein isoform X2 [Macaca fascicularis] | GCF_000364345.1 | TRADD-N |
| XP_015298663.1 | TRADD_N+Death | 248 | TRADD      | vertebrata | Macaca fascicularis        | PREDICTED: tumor necrosis factor receptor type 1-associated DEATH domain protein isoform X3 [Macaca fascicularis] | GCF_000364345.1 | TRADD-N |
| XP_014981851.1 | TRADD_N+Death | 365 | TRADD      | vertebrata | Macaca mulatta             | PREDICTED: tumor necrosis factor receptor type 1-associated DEATH domain protein isoform X1 [Macaca mulatta]      | -               | TRADD-N |
| KFW75858.1     | TRADD_N+Death | 307 | N305_10431 | vertebrata | Manacus vitellinus         | Tumor necrosis factor receptor type 1-associated DEATH domain protein, partial [Manacus vitellinus]               | GCA_000692015.2 | TRADD-N |
| XP_008931637.2 | TRADD_N+Death | 306 | TRADD      | vertebrata | Manacus vitellinus         | tumor necrosis factor receptor type 1-associated DEATH domain protein [Manacus vitellinus]                        | GCF_001715985.3 | TRADD-N |
| XP_017504690.1 | TRADD_N+Death | 325 | TRADD      | vertebrata | Manis javanica             | PREDICTED: tumor necrosis factor receptor type 1-associated DEATH domain protein isoform X1 [Manis javanica]      | GCF_001685135.1 | TRADD-N |
| XP_017504691.1 | TRADD_N+Death | 314 | TRADD      | vertebrata | Manis javanica             | PREDICTED: tumor necrosis factor receptor type 1-associated DEATH domain protein isoform X2 [Manis javanica]      | GCF_001685135.1 | TRADD-N |
| XP_017504692.1 | TRADD_N+Death | 311 | TRADD      | vertebrata | Manis javanica             | PREDICTED: tumor necrosis factor receptor type 1-associated DEATH domain protein isoform X3 [Manis javanica]      | GCF_001685135.1 | TRADD-N |

| acc            | architecture  | len | gen.name     | taxend     | species                 | define                                                                                                              | gca             | clade   |
|----------------|---------------|-----|--------------|------------|-------------------------|---------------------------------------------------------------------------------------------------------------------|-----------------|---------|
| XP_017504698.1 | TRADD_N+Death | 302 | TRADD        | vertebrata | Manis javanica          | PREDICTED: tumor necrosis factor receptor type 1-associated DEATH domain protein isoform X4 [Manis javanica]        | GCF_001685135.1 | TRADD-N |
| XP_015351727.1 | TRADD_N+Death | 314 | Tradd        | vertebrata | Marmota marmota marmota | PREDICTED: tumor necrosis factor receptor type 1-associated DEATH domain protein [Marmota marmota marmota]          | GCF_001458135.1 | TRADD-N |
| XP_005152306.1 | TRADD_N+Death | 303 | LOC101871193 | vertebrata | Melopsittacus undulatus | PREDICTED: tumor necrosis factor receptor type 1-associated DEATH domain protein [Melopsittacus undulatus]          | GCF_000238935.1 | TRADD-N |
| XP_021487414.1 | TRADD_N+Death | 312 | Tradd        | vertebrata | Meriones unguiculatus   | tumor necrosis factor receptor type 1-associated DEATH domain protein [Meriones unguiculatus]                       | GCF_002204375.1 | TRADD-N |
| KFQ23293.1     | TRADD_N+Death | 306 | N331_05462   | vertebrata | Merops nubicus          | Tumor necrosis factor receptor type 1-associated DEATH domain protein, partial [Merops nubicus]                     | GCA_000691845.1 | TRADD-N |
| XP_008946956.1 | TRADD_N+Death | 305 | TRADD        | vertebrata | Merops nubicus          | PREDICTED: tumor necrosis factor receptor type 1-associated DEATH domain protein [Merops nubicus]                   | GCF_000691845.1 | TRADD-N |
| KFQ19613.1     | TRADD_N+Death | 304 | N332_02934   | vertebrata | Mesitornis unicolor     | Tumor necrosis factor receptor type 1-associated DEATH domain protein, partial [Mesitornis unicolor]                | GCA_000695765.1 | TRADD-N |
| XP_010179850.1 | TRADD_N+Death | 310 | TRADD        | vertebrata | Mesitornis unicolor     | PREDICTED: tumor necrosis factor receptor type 1-associated DEATH domain protein, partial [Mesitornis unicolor]     | GCF_000695765.1 | TRADD-N |
| XP_005076251.1 | TRADD_N+Death | 310 | Tradd        | vertebrata | Mesocricetus auratus    | tumor necrosis factor receptor type 1-associated DEATH domain protein isoform X2 [Mesocricetus auratus]             | GCF_000349665.1 | TRADD-N |
| XP_021086346.1 | TRADD_N+Death | 338 | Tradd        | vertebrata | Mesocricetus auratus    | tumor necrosis factor receptor type 1-associated DEATH domain protein isoform X1 [Mesocricetus auratus]             | GCF_000349665.1 | TRADD-N |
| XP_012598048.1 | TRADD_N+Death | 309 | TRADD        | vertebrata | Microcebus murinus      | tumor necrosis factor receptor type 1-associated DEATH domain protein [Microcebus murinus]                          | GCF_000165445.2 | TRADD-N |
| XP_005345550.1 | TRADD_N+Death | 303 | Tradd        | vertebrata | Microtus ochrogaster    | tumor necrosis factor receptor type 1-associated DEATH domain protein [Microtus ochrogaster]                        | GCF_000317375.1 | TRADD-N |
| XP_016069064.1 | TRADD_N+Death | 313 | TRADD        | vertebrata | Miniopterus natalensis  | PREDICTED: tumor necrosis factor receptor type 1-associated DEATH domain protein [Miniopterus natalensis]           | GCF_001595765.1 | TRADD-N |
| XP_001372553.3 | TRADD_N+Death | 361 | TRADD        | vertebrata | Monodelphis domestica   | PREDICTED: tumor necrosis factor receptor type 1-associated DEATH domain protein isoform X1 [Monodelphis domestica] | GCF_000002295.2 | TRADD-N |
| XP_007477195.1 | TRADD_N+Death | 339 | TRADD        | vertebrata | Monodelphis domestica   | PREDICTED: tumor necrosis factor receptor type 1-associated DEATH domain protein isoform X2 [Monodelphis domestica] | GCF_000002295.2 | TRADD-N |

| acc            | architecture  | len | gen.name               | taxend     | species                   | define                                                                                                              | gca              | clade   |
|----------------|---------------|-----|------------------------|------------|---------------------------|---------------------------------------------------------------------------------------------------------------------|------------------|---------|
| XP_007477196.1 | TRADD_N+Death | 327 | TRADD                  | vertebrata | Monodelphis domestica     | PREDICTED: tumor necrosis factor receptor type 1-associated DEATH domain protein isoform X3 [Monodelphis domestica] | GCF_000002295.2  | TRADD-N |
| XP_021026411.1 | TRADD_N+Death | 310 | Tradd                  | vertebrata | Mus caroli                | tumor necrosis factor receptor type 1-associated DEATH domain protein [Mus caroli]                                  | GCF_900094665.1  | TRADD-N |
| NP_001028333.1 | TRADD_N+Death | 310 | 9130005N23Rik,AA930854 | vertebrata | Mus musculus              | tumor necrosis factor receptor type 1-associated DEATH domain protein [Mus musculus]                                | GCF_000001635.26 | TRADD-N |
| XP_021076272.1 | TRADD_N+Death | 310 | Tradd                  | vertebrata | Mus pahari                | tumor necrosis factor receptor type 1-associated DEATH domain protein [Mus pahari]                                  | GCF_900095145.1  | TRADD-N |
| XP_004744405.1 | TRADD_N+Death | 314 | TRADD                  | vertebrata | Mustela putorius furo     | PREDICTED: tumor necrosis factor receptor type 1-associated DEATH domain protein [Mustela putorius furo]            | GCF_000215625.1  | TRADD-N |
| XP_005876426.1 | TRADD_N+Death | 251 | TRADD                  | vertebrata | Myotis brandtii           | PREDICTED: tumor necrosis factor receptor type 1-associated DEATH domain protein isoform X2 [Myotis brandtii]       | GCF_000412655.1  | TRADD-N |
| XP_005876427.1 | TRADD_N+Death | 310 | TRADD                  | vertebrata | Myotis brandtii           | PREDICTED: tumor necrosis factor receptor type 1-associated DEATH domain protein isoform X1 [Myotis brandtii]       | GCF_000412655.1  | TRADD-N |
| ELK25625.1     | TRADD_N+Death | 310 | MDA_GLEAN10017117      | vertebrata | Myotis davidii            | Tumor necrosis factor receptor type 1-associated DEATH domain protein [Myotis davidii]                              | GCA_000327345.1  | TRADD-N |
| XP_006769870.1 | TRADD_N+Death | 365 | TRADD                  | vertebrata | Myotis davidii            | PREDICTED: tumor necrosis factor receptor type 1-associated DEATH domain protein [Myotis davidii]                   | GCF_000327345.1  | TRADD-N |
| XP_006099450.1 | TRADD_N+Death | 310 | TRADD                  | vertebrata | Myotis lucifugus          | tumor necrosis factor receptor type 1-associated DEATH domain protein isoform X1 [Myotis lucifugus]                 | GCF_000147115.1  | TRADD-N |
| XP_014320401.1 | TRADD_N+Death | 251 | TRADD                  | vertebrata | Myotis lucifugus          | tumor necrosis factor receptor type 1-associated DEATH domain protein isoform X2 [Myotis lucifugus]                 | GCF_000147115.1  | TRADD-N |
| XP_008837333.1 | TRADD_N+Death | 319 | Tradd                  | vertebrata | Nannospalax galili        | PREDICTED: tumor necrosis factor receptor type 1-associated DEATH domain protein isoform X1 [Nannospalax galili]    | GCF_000622305.1  | TRADD-N |
| XP_008837335.1 | TRADD_N+Death | 313 | Tradd                  | vertebrata | Nannospalax galili        | PREDICTED: tumor necrosis factor receptor type 1-associated DEATH domain protein isoform X2 [Nannospalax galili]    | -                | TRADD-N |
| XP_018420366.1 | TRADD_N+Death | 301 | TRADD                  | vertebrata | Nanorana parkeri          | PREDICTED: tumor necrosis factor receptor type 1-associated DEATH domain protein [Nanorana parkeri]                 | GCF_000935625.1  | TRADD-N |
| XP_021559631.1 | TRADD_N+Death | 312 | TRADD                  | vertebrata | Neomonachus schauinslandi | tumor necrosis factor receptor type 1-associated DEATH domain protein isoform X1 [Neomonachus schauinslandi]        | GCF_002201575.1  | TRADD-N |

| acc            | architecture  | len | gen.name    | taxend     | species                     | define                                                                                                                    | gca             | clade   |
|----------------|---------------|-----|-------------|------------|-----------------------------|---------------------------------------------------------------------------------------------------------------------------|-----------------|---------|
| XP_021559639.1 | TRADD_N+Death | 288 | TRADD       | vertebrata | Neomonachus schauinslandi   | tumor necrosis factor receptor type 1-associated DEATH domain protein isoform X2 [Neomonachus schauinslandi]              | GCF_002201575.1 | TRADD-N |
| XP_024589574.1 | TRADD_N+Death | 311 | TRADD       | vertebrata | Neophocaena asiaeorientalis | tumor necrosis factor receptor type 1-associated DEATH domain protein [Neophocaena asiaeorientalis]                       | GCF_003031525.1 | TRADD-N |
| OBS58325.1     | TRADD_N+Death | 319 | A6R68_10559 | vertebrata | Neotoma lepida              | hypothetical protein A6R68_10559 [Neotoma lepida]                                                                         | GCA_001675575.1 | TRADD-N |
| KFQ54821.1     | TRADD_N+Death | 307 | N333_10317  | vertebrata | Nestor notabilis            | Tumor necrosis factor receptor type 1-associated DEATH domain protein, partial [Nestor notabilis]                         | GCA_000696875.1 | TRADD-N |
| XP_010018560.1 | TRADD_N+Death | 306 | TRADD       | vertebrata | Nestor notabilis            | PREDICTED: tumor necrosis factor receptor type 1-associated DEATH domain protein [Nestor notabilis]                       | GCF_000696875.1 | TRADD-N |
| KFR01638.1     | TRADD_N+Death | 307 | Y956_12945  | vertebrata | Nipponia nippon             | Tumor necrosis factor receptor type 1-associated DEATH domain protein, partial [Nipponia nippon]                          | GCA_000708225.1 | TRADD-N |
| XP_009467511.1 | TRADD_N+Death | 306 | TRADD       | vertebrata | Nipponia nippon             | PREDICTED: tumor necrosis factor receptor type 1-associated DEATH domain protein [Nipponia nippon]                        | GCF_000708225.1 | TRADD-N |
| XP_003262922.1 | TRADD_N+Death | 311 | TRADD       | vertebrata | Nomascus leucogenys         | PREDICTED: tumor necrosis factor receptor type 1-associated DEATH domain protein [Nomascus leucogenys]                    | GCF_006542625.1 | TRADD-N |
| XP_026527890.1 | TRADD_N+Death | 311 | TRADD       | vertebrata | Notechis scutatus           | tumor necrosis factor receptor type 1-associated DEATH domain protein [Notechis scutatus]                                 | GCF_900518725.1 | TRADD-N |
| XP_025898916.1 | TRADD_N+Death | 306 | TRADD       | vertebrata | Nothoprocta perdicaria      | tumor necrosis factor receptor type 1-associated DEATH domain protein [Nothoprocta perdicaria]                            | GCF_003342845.1 | TRADD-N |
| XP_021264133.1 | TRADD_N+Death | 304 | TRADD       | vertebrata | Numida meleagris            | tumor necrosis factor receptor type 1-associated DEATH domain protein [Numida meleagris]                                  | GCF_002078875.1 | TRADD-N |
| XP_004583984.1 | TRADD_N+Death | 312 | TRADD       | vertebrata | Ochotona princeps           | PREDICTED: tumor necrosis factor receptor type 1-associated DEATH domain protein [Ochotona princeps]                      | GCF_000292845.1 | TRADD-N |
| XP_004625946.1 | TRADD_N+Death | 309 | Tradd       | vertebrata | Octodon degus               | tumor necrosis factor receptor type 1-associated DEATH domain protein [Octodon degus]                                     | GCF_000260255.1 | TRADD-N |
| XP_004393459.1 | TRADD_N+Death | 313 | TRADD       | vertebrata | Odobenus rosmarus divergens | PREDICTED: tumor necrosis factor receptor type 1-associated DEATH domain protein isoform X2 [Odobenus rosmarus divergens] | GCF_000321225.1 | TRADD-N |
| XP_012421593.1 | TRADD_N+Death | 324 | TRADD       | vertebrata | Odobenus rosmarus divergens | PREDICTED: tumor necrosis factor receptor type 1-associated DEATH domain protein isoform X1 [Odobenus rosmarus divergens] | GCF_000321225.1 | TRADD-N |

| acc            | architecture  | len | gen.name   | taxend     | species                        | define                                                                                                            | gca             | clade   |
|----------------|---------------|-----|------------|------------|--------------------------------|-------------------------------------------------------------------------------------------------------------------|-----------------|---------|
| XP_020740576.1 | TRADD_N+Death | 367 | TRADD      | vertebrata | Odocoileus virginianus texanus | tumor necrosis factor receptor type 1-associated DEATH domain protein isoform X1 [Odocoileus virginianus texanus] | GCF_002102435.1 | TRADD-N |
| XP_020740577.1 | TRADD_N+Death | 357 | TRADD      | vertebrata | Odocoileus virginianus texanus | tumor necrosis factor receptor type 1-associated DEATH domain protein isoform X2 [Odocoileus virginianus texanus] | GCF_002102435.1 | TRADD-N |
| XP_020740578.1 | TRADD_N+Death | 322 | TRADD      | vertebrata | Odocoileus virginianus texanus | tumor necrosis factor receptor type 1-associated DEATH domain protein isoform X3 [Odocoileus virginianus texanus] | GCF_002102435.1 | TRADD-N |
| XP_020740579.1 | TRADD_N+Death | 312 | TRADD      | vertebrata | Odocoileus virginianus texanus | tumor necrosis factor receptor type 1-associated DEATH domain protein isoform X4 [Odocoileus virginianus texanus] | GCF_002102435.1 | TRADD-N |
| XP_020740580.1 | TRADD_N+Death | 297 | TRADD      | vertebrata | Odocoileus virginianus texanus | tumor necrosis factor receptor type 1-associated DEATH domain protein isoform X5 [Odocoileus virginianus texanus] | GCF_002102435.1 | TRADD-N |
| KFR15328.1     | TRADD_N+Death | 307 | N306_14394 | vertebrata | Opisthocomus hoazin            | Tumor necrosis factor receptor type 1-associated DEATH domain protein, partial [Opisthocomus hoazin]              | GCA_000692075.1 | TRADD-N |
| XP_009938729.1 | TRADD_N+Death | 306 | TRADD      | vertebrata | Opisthocomus hoazin            | PREDICTED: tumor necrosis factor receptor type 1-associated DEATH domain protein [Opisthocomus hoazin]            | GCF_000692075.1 | TRADD-N |
| XP_004280921.1 | TRADD_N+Death | 314 | TRADD      | vertebrata | Orcinus orca                   | PREDICTED: tumor necrosis factor receptor type 1-associated DEATH domain protein isoform X1 [Orcinus orca]        | GCF_000331955.2 | TRADD-N |
| XP_012392583.1 | TRADD_N+Death | 254 | TRADD      | vertebrata | Orcinus orca                   | PREDICTED: tumor necrosis factor receptor type 1-associated DEATH domain protein isoform X2 [Orcinus orca]        | GCF_000331955.2 | TRADD-N |
| XP_007938578.1 | TRADD_N+Death | 312 | TRADD      | vertebrata | Orycteropus afer afer          | PREDICTED: tumor necrosis factor receptor type 1-associated DEATH domain protein [Orycteropus afer afer]          | GCF_000298275.1 | TRADD-N |
| XP_002711696.1 | TRADD_N+Death | 304 | TRADD      | vertebrata | Oryctolagus cuniculus          | PREDICTED: tumor necrosis factor receptor type 1-associated DEATH domain protein [Oryctolagus cuniculus]          | GCF_000003625.3 | TRADD-N |
| XP_003799456.1 | TRADD_N+Death | 309 | TRADD      | vertebrata | Otolemur garnettii             | tumor necrosis factor receptor type 1-associated DEATH domain protein [Otolemur garnettii]                        | GCF_000181295.1 | TRADD-N |
| XP_004015107.1 | TRADD_N+Death | 312 | TRADD      | vertebrata | Ovis aries                     | PREDICTED: tumor necrosis factor receptor type 1-associated DEATH domain protein isoform X1 [Ovis aries]          | -               | TRADD-N |

| acc            | architecture  | len | gen.name   | taxend     | species                        | define                                                                                                            | gca             | clade   |
|----------------|---------------|-----|------------|------------|--------------------------------|-------------------------------------------------------------------------------------------------------------------|-----------------|---------|
| XP_014197275.1 | TRADD_N+Death | 312 | TRADD      | vertebrata | Pan paniscus                   | LOW QUALITY PROTEIN: tumor necrosis factor receptor type 1-associated DEATH domain protein [Pan paniscus]         | GCF_000258655.2 | TRADD-N |
| XP_019311196.1 | TRADD_N+Death | 378 | TRADD      | vertebrata | Panthera pardus                | PREDICTED: tumor necrosis factor receptor type 1-associated DEATH domain protein isoform X1 [Panthera pardus]     | GCF_001857705.1 | TRADD-N |
| XP_019311197.1 | TRADD_N+Death | 317 | TRADD      | vertebrata | Panthera pardus                | PREDICTED: tumor necrosis factor receptor type 1-associated DEATH domain protein isoform X2 [Panthera pardus]     | GCF_001857705.1 | TRADD-N |
| XP_019311198.1 | TRADD_N+Death | 311 | TRADD      | vertebrata | Panthera pardus                | PREDICTED: tumor necrosis factor receptor type 1-associated DEATH domain protein isoform X3 [Panthera pardus]     | GCF_001857705.1 | TRADD-N |
| XP_015396586.1 | TRADD_N+Death | 277 | TRADD      | vertebrata | Panthera tigris altaica        | PREDICTED: tumor necrosis factor receptor type 1-associated DEATH domain protein [Panthera tigris altaica]        | GCF_000464555.1 | TRADD-N |
| XP_005959242.1 | TRADD_N+Death | 312 | TRADD      | vertebrata | Pantholops hodgsonii           | PREDICTED: tumor necrosis factor receptor type 1-associated DEATH domain protein [Pantholops hodgsonii]           | -               | TRADD-N |
| XP_003917062.1 | TRADD_N+Death | 308 | TRADD      | vertebrata | Papio anubis                   | tumor necrosis factor receptor type 1-associated DEATH domain protein isoform X2 [Papio anubis]                   | GCF_000264685.3 | TRADD-N |
| XP_017808975.1 | TRADD_N+Death | 366 | TRADD      | vertebrata | Papio anubis                   | tumor necrosis factor receptor type 1-associated DEATH domain protein isoform X1 [Papio anubis]                   | GCF_000264685.3 | TRADD-N |
| XP_015495776.1 | TRADD_N+Death | 364 | TRADD      | vertebrata | Parus major                    | PREDICTED: tumor necrosis factor receptor type 1-associated DEATH domain protein isoform X1 [Parus major]         | GCF_001522545.3 | TRADD-N |
| XP_015495777.1 | TRADD_N+Death | 306 | TRADD      | vertebrata | Parus major                    | PREDICTED: tumor necrosis factor receptor type 1-associated DEATH domain protein isoform X2 [Parus major]         | GCF_001522545.3 | TRADD-N |
| KFQ65703.1     | TRADD_N+Death | 307 | N334_10538 | vertebrata | Pelecanus crispus              | Tumor necrosis factor receptor type 1-associated DEATH domain protein, partial [Pelecanus crispus]                | GCA_000687375.1 | TRADD-N |
| XP_009488746.1 | TRADD_N+Death | 306 | TRADD      | vertebrata | Pelecanus crispus              | PREDICTED: tumor necrosis factor receptor type 1-associated DEATH domain protein [Pelecanus crispus]              | GCF_000687375.1 | TRADD-N |
| XP_006121021.1 | TRADD_N+Death | 304 | TRADD      | vertebrata | Pelodiscus sinensis            | tumor necrosis factor receptor type 1-associated DEATH domain protein [Pelodiscus sinensis]                       | GCF_000230535.1 | TRADD-N |
| XP_006986839.1 | TRADD_N+Death | 310 | Tradd      | vertebrata | Peromyscus maniculatus bairdii | PREDICTED: tumor necrosis factor receptor type 1-associated DEATH domain protein [Peromyscus maniculatus bairdii] | GCF_000500345.1 | TRADD-N |

| acc            | architecture  | len | gen.name   | taxend     | species                    | define                                                                                                       | gca             | clade   |
|----------------|---------------|-----|------------|------------|----------------------------|--------------------------------------------------------------------------------------------------------------|-----------------|---------|
| KFQ71879.1     | TRADD_N+Death | 307 | N335_03863 | vertebrata | Phaethon lepturus          | Tumor necrosis factor receptor type 1-associated DEATH domain protein, partial [Phaethon lepturus]           | GCA_000687285.1 | TRADD-N |
| XP_010281617.1 | TRADD_N+Death | 306 | TRADD      | vertebrata | Phaethon lepturus          | PREDICTED: tumor necrosis factor receptor type 1-associated DEATH domain protein [Phaethon lepturus]         | GCF_000687285.1 | TRADD-N |
| KFW89154.1     | TRADD_N+Death | 307 | N336_02754 | vertebrata | Phalacrocorax carbo        | Tumor necrosis factor receptor type 1-associated DEATH domain protein, partial [Phalacrocorax carbo]         | GCA_000708925.1 | TRADD-N |
| XP_009499517.1 | TRADD_N+Death | 306 | TRADD      | vertebrata | Phalacrocorax carbo        | PREDICTED: tumor necrosis factor receptor type 1-associated DEATH domain protein [Phalacrocorax carbo]       | GCF_000708925.1 | TRADD-N |
| XP_020845056.1 | TRADD_N+Death | 351 | TRADD      | vertebrata | Phascolarctos cinereus     | tumor necrosis factor receptor type 1-associated DEATH domain protein isoform X1 [Phascolarctos cinereus]    | GCF_002099425.1 | TRADD-N |
| XP_020845057.1 | TRADD_N+Death | 332 | TRADD      | vertebrata | Phascolarctos cinereus     | tumor necrosis factor receptor type 1-associated DEATH domain protein isoform X2 [Phascolarctos cinereus]    | GCF_002099425.1 | TRADD-N |
| XP_020845058.1 | TRADD_N+Death | 332 | TRADD      | vertebrata | Phascolarctos cinereus     | tumor necrosis factor receptor type 1-associated DEATH domain protein isoform X3 [Phascolarctos cinereus]    | GCF_002099425.1 | TRADD-N |
| KFQ78172.1     | TRADD_N+Death | 306 | N337_11812 | vertebrata | Phoenicopterus ruber ruber | Tumor necrosis factor receptor type 1-associated DEATH domain protein, partial [Phoenicopterus ruber ruber]  | GCA_000687265.1 | TRADD-N |
| XP_007125939.1 | TRADD_N+Death | 313 | TRADD      | vertebrata | Physeter catodon           | tumor necrosis factor receptor type 1-associated DEATH domain protein [Physeter catodon]                     | GCF_002837175.2 | TRADD-N |
| KFV66369.1     | TRADD_N+Death | 306 | N307_05671 | vertebrata | Picoides pubescens         | Tumor necrosis factor receptor type 1-associated DEATH domain protein, partial [Picoides pubescens]          | GCA_000699005.1 | TRADD-N |
| XP_009897449.1 | TRADD_N+Death | 305 | TRADD      | vertebrata | Picoides pubescens         | PREDICTED: tumor necrosis factor receptor type 1-associated DEATH domain protein [Picoides pubescens]        | GCF_000699005.1 | TRADD-N |
| XP_023065900.1 | TRADD_N+Death | 346 | TRADD      | vertebrata | Piliocolobus tephrosceles  | tumor necrosis factor receptor type 1-associated DEATH domain protein isoform X1 [Piliocolobus tephrosceles] | GCF_002776525.2 | TRADD-N |
| XP_023065901.1 | TRADD_N+Death | 308 | TRADD      | vertebrata | Piliocolobus tephrosceles  | tumor necrosis factor receptor type 1-associated DEATH domain protein isoform X2 [Piliocolobus tephrosceles] | GCF_002776525.2 | TRADD-N |
| XP_023065902.1 | TRADD_N+Death | 248 | TRADD      | vertebrata | Piliocolobus tephrosceles  | tumor necrosis factor receptor type 1-associated DEATH domain protein isoform X3 [Piliocolobus tephrosceles] | GCF_002776525.2 | TRADD-N |
| KFZ64629.1     | TRADD_N+Death | 307 | N338_09052 | vertebrata | Podiceps cristatus         | Tumor necrosis factor receptor type 1-associated DEATH domain protein, partial [Podiceps cristatus]          | GCA_000699545.1 | TRADD-N |

| acc            | architecture  | len | gen.name   | taxend     | species                      | define                                                                                                          | gca             | clade   |
|----------------|---------------|-----|------------|------------|------------------------------|-----------------------------------------------------------------------------------------------------------------|-----------------|---------|
| XP_020661796.1 | TRADD_N+Death | 355 | TRADD      | vertebrata | Pogona vitticeps             | tumor necrosis factor receptor type 1-associated DEATH domain protein isoform X1 [Pogona vitticeps]             | GCF_900067755.1 | TRADD-N |
| XP_020661797.1 | TRADD_N+Death | 326 | TRADD      | vertebrata | Pogona vitticeps             | tumor necrosis factor receptor type 1-associated DEATH domain protein isoform X2 [Pogona vitticeps]             | GCF_900067755.1 | TRADD-N |
| XP_024089129.1 | TRADD_N+Death | 311 | TRADD      | vertebrata | Pongo abelii                 | tumor necrosis factor receptor type 1-associated DEATH domain protein isoform X1 [Pongo abelii]                 | GCF_002880775.1 | TRADD-N |
| XP_024089134.1 | TRADD_N+Death | 251 | TRADD      | vertebrata | Pongo abelii                 | tumor necrosis factor receptor type 1-associated DEATH domain protein isoform X2 [Pongo abelii]                 | GCF_002880775.1 | TRADD-N |
| XP_012516046.1 | TRADD_N+Death | 309 | TRADD      | vertebrata | Propithecus coquereli        | PREDICTED: tumor necrosis factor receptor type 1-associated DEATH domain protein [Propithecus coquereli]        | GCF_000956105.1 | TRADD-N |
| XP_015678437.1 | TRADD_N+Death | 352 | TRADD      | vertebrata | Protobothrops mucrosquamatus | PREDICTED: tumor necrosis factor receptor type 1-associated DEATH domain protein [Protobothrops mucrosquamatus] | GCF_001527695.2 | TRADD-N |
| XP_026570211.1 | TRADD_N+Death | 311 | TRADD      | vertebrata | Pseudonaja textilis          | tumor necrosis factor receptor type 1-associated DEATH domain protein [Pseudonaja textilis]                     | GCF_900518735.1 | TRADD-N |
| XP_005526385.1 | TRADD_N+Death | 306 | TRADD      | vertebrata | Pseudopodoces humilis        | PREDICTED: tumor necrosis factor receptor type 1-associated DEATH domain protein [Pseudopodoces humilis]        | GCF_000331425.1 | TRADD-N |
| KFV05659.1     | TRADD_N+Death | 306 | N339_07494 | vertebrata | Pterocles gutturalis         | Tumor necrosis factor receptor type 1-associated DEATH domain protein, partial [Pterocles gutturalis]           | GCA_000699245.1 | TRADD-N |
| XP_010086149.1 | TRADD_N+Death | 305 | TRADD      | vertebrata | Pterocles gutturalis         | PREDICTED: tumor necrosis factor receptor type 1-associated DEATH domain protein [Pterocles gutturalis]         | GCF_000699245.1 | TRADD-N |
| XP_006909805.1 | TRADD_N+Death | 310 | TRADD      | vertebrata | Pteropus alecto              | tumor necrosis factor receptor type 1-associated DEATH domain protein [Pteropus alecto]                         | GCF_000325575.1 | TRADD-N |
| XP_011378738.1 | TRADD_N+Death | 310 | TRADD      | vertebrata | Pteropus vampyrus            | tumor necrosis factor receptor type 1-associated DEATH domain protein [Pteropus vampyrus]                       | GCF_000151845.1 | TRADD-N |
| KFW64901.1     | TRADD_N+Death | 307 | AS28_12927 | vertebrata | Pygoscelis adeliae           | Tumor necrosis factor receptor type 1-associated DEATH domain protein, partial [Pygoscelis adeliae]             | GCA_000699105.1 | TRADD-N |
| XP_009319092.1 | TRADD_N+Death | 306 | TRADD      | vertebrata | Pygoscelis adeliae           | PREDICTED: tumor necrosis factor receptor type 1-associated DEATH domain protein [Pygoscelis adeliae]           | GCF_000699105.1 | TRADD-N |
| XP_007430728.1 | TRADD_N+Death | 316 | TRADD      | vertebrata | Python bivittatus            | tumor necrosis factor receptor type 1-associated DEATH domain protein isoform X2 [Python bivittatus]            | GCF_000186305.1 | TRADD-N |
| XP_025023978.1 | TRADD_N+Death | 361 | TRADD      | vertebrata | Python bivittatus            | tumor necrosis factor receptor type 1-associated DEATH domain protein isoform X1 [Python bivittatus]            | GCF_000186305.1 | TRADD-N |



| acc            | architecture  | len | gen.name | taxend     | species                 | define                                                                                                                | gca             | clade   |
|----------------|---------------|-----|----------|------------|-------------------------|-----------------------------------------------------------------------------------------------------------------------|-----------------|---------|
| NP_001093950.1 | TRADD_N+Death | 310 | Tradd    | vertebrata | Rattus norvegicus       | tumor necrosis factor receptor type 1-associated DEATH domain protein [Rattus norvegicus]                             | GCF_000002265.2 | TRADD-N |
| XP_006255504.1 | TRADD_N+Death | 358 | Tradd    | vertebrata | Rattus norvegicus       | PREDICTED: tumor necrosis factor receptor type 1-associated DEATH domain protein isoform X1 [Rattus norvegicus]       | GCF_000001895.5 | TRADD-N |
| XP_020378542.1 | TRADD_N+Death | 317 | tradd    | vertebrata | Rhincodon typus         | tumor necrosis factor receptor type 1-associated DEATH domain protein isoform X1 [Rhincodon typus]                    | GCF_001642345.1 | TRADD-N |
| XP_020378550.1 | TRADD_N+Death | 313 | tradd    | vertebrata | Rhincodon typus         | tumor necrosis factor receptor type 1-associated DEATH domain protein isoform X2 [Rhincodon typus]                    | GCF_001642345.1 | TRADD-N |
| XP_019611094.1 | TRADD_N+Death | 309 | TRADD    | vertebrata | Rhinolophus sinicus     | PREDICTED: tumor necrosis factor receptor type 1-associated DEATH domain protein isoform X1 [Rhinolophus sinicus]     | -               | TRADD-N |
| XP_019611097.1 | TRADD_N+Death | 253 | TRADD    | vertebrata | Rhinolophus sinicus     | PREDICTED: tumor necrosis factor receptor type 1-associated DEATH domain protein isoform X2 [Rhinolophus sinicus]     | -               | TRADD-N |
| XP_017707803.1 | TRADD_N+Death | 349 | TRADD    | vertebrata | Rhinopithecus bieti     | PREDICTED: tumor necrosis factor receptor type 1-associated DEATH domain protein isoform X1 [Rhinopithecus bieti]     | GCF_001698545.1 | TRADD-N |
| XP_017707804.1 | TRADD_N+Death | 308 | TRADD    | vertebrata | Rhinopithecus bieti     | PREDICTED: tumor necrosis factor receptor type 1-associated DEATH domain protein isoform X2 [Rhinopithecus bieti]     | GCF_001698545.1 | TRADD-N |
| XP_017707805.1 | TRADD_N+Death | 248 | TRADD    | vertebrata | Rhinopithecus bieti     | PREDICTED: tumor necrosis factor receptor type 1-associated DEATH domain protein isoform X3 [Rhinopithecus bieti]     | GCF_001698545.1 | TRADD-N |
| XP_010353442.1 | TRADD_N+Death | 308 | TRADD    | vertebrata | Rhinopithecus roxellana | PREDICTED: tumor necrosis factor receptor type 1-associated DEATH domain protein isoform X1 [Rhinopithecus roxellana] | GCF_007565055.1 | TRADD-N |
| XP_010353443.1 | TRADD_N+Death | 248 | TRADD    | vertebrata | Rhinopithecus roxellana | PREDICTED: tumor necrosis factor receptor type 1-associated DEATH domain protein isoform X2 [Rhinopithecus roxellana] | GCF_007565055.1 | TRADD-N |
| XP_016018941.1 | TRADD_N+Death | 310 | TRADD    | vertebrata | Rousettus aegyptiacus   | PREDICTED: tumor necrosis factor receptor type 1-associated DEATH domain protein isoform X1 [Rousettus aegyptiacus]   | GCF_001466805.2 | TRADD-N |
| XP_016018971.1 | TRADD_N+Death | 251 | TRADD    | vertebrata | Rousettus aegyptiacus   | PREDICTED: tumor necrosis factor receptor type 1-associated DEATH domain protein isoform X2 [Rousettus aegyptiacus]   | GCF_001466805.2 | TRADD-N |

| acc            | architecture  | len | gen.name   | taxend     | species                         | define                                                                                                                        | gca             | clade   |
|----------------|---------------|-----|------------|------------|---------------------------------|-------------------------------------------------------------------------------------------------------------------------------|-----------------|---------|
| XP_003936333.1 | TRADD_N+Death | 312 | TRADD      | vertebrata | Saimiri boliviensis boliviensis | PREDICTED: tumor necrosis factor receptor type 1-associated DEATH domain protein isoform X1 [Saimiri boliviensis boliviensis] | GCF_000235385.1 | TRADD-N |
| XP_010345051.1 | TRADD_N+Death | 252 | TRADD      | vertebrata | Saimiri boliviensis boliviensis | PREDICTED: tumor necrosis factor receptor type 1-associated DEATH domain protein isoform X2 [Saimiri boliviensis boliviensis] | GCF_000235385.1 | TRADD-N |
| XP_009088901.1 | TRADD_N+Death | 306 | TRADD      | vertebrata | Serinus canaria                 | PREDICTED: tumor necrosis factor receptor type 1-associated DEATH domain protein [Serinus canaria]                            | GCF_007115625.1 | TRADD-N |
| XP_004600669.1 | TRADD_N+Death | 317 | TRADD      | vertebrata | Sorex araneus                   | PREDICTED: tumor necrosis factor receptor type 1-associated DEATH domain protein [Sorex araneus]                              | GCF_000181275.1 | TRADD-N |
| KFV83046.1     | TRADD_N+Death | 305 | N308_03904 | vertebrata | Struthio camelus australis      | Tumor necrosis factor receptor type 1-associated DEATH domain protein, partial [Struthio camelus australis]                   | GCA_000698965.1 | TRADD-N |
| XP_009676546.1 | TRADD_N+Death | 306 | TRADD      | vertebrata | Struthio camelus australis      | PREDICTED: tumor necrosis factor receptor type 1-associated DEATH domain protein [Struthio camelus australis]                 | GCF_000698965.1 | TRADD-N |
| XP_014736314.1 | TRADD_N+Death | 306 | TRADD      | vertebrata | Sturnus vulgaris                | PREDICTED: tumor necrosis factor receptor type 1-associated DEATH domain protein [Sturnus vulgaris]                           | GCF_001447265.1 | TRADD-N |
| XP_020949706.1 | TRADD_N+Death | 304 | TRADD      | vertebrata | Sus scrofa                      | tumor necrosis factor receptor type 1-associated DEATH domain protein [Sus scrofa]                                            | GCF_000003025.6 | TRADD-N |
| XP_012425553.1 | TRADD_N+Death | 348 | TRADD      | vertebrata | Taeniopygia guttata             | PREDICTED: tumor necrosis factor receptor type 1-associated DEATH domain protein [Taeniopygia guttata]                        | -               | TRADD-N |
| KFV14431.1     | TRADD_N+Death | 307 | N340_07016 | vertebrata | Tauraco erythrolophus           | Tumor necrosis factor receptor type 1-associated DEATH domain protein, partial [Tauraco erythrolophus]                        | GCA_000709365.1 | TRADD-N |
| XP_009980988.1 | TRADD_N+Death | 306 | TRADD      | vertebrata | Tauraco erythrolophus           | PREDICTED: tumor necrosis factor receptor type 1-associated DEATH domain protein [Tauraco erythrolophus]                      | GCF_000709365.1 | TRADD-N |
| XP_024058017.1 | TRADD_N+Death | 307 | TRADD      | vertebrata | Terrapene mexicana triunguis    | tumor necrosis factor receptor type 1-associated DEATH domain protein [Terrapene mexicana triunguis]                          | GCF_002925995.2 | TRADD-N |
| XP_013921136.1 | TRADD_N+Death | 248 | TRADD      | vertebrata | Thamnophis sirtalis             | PREDICTED: tumor necrosis factor receptor type 1-associated DEATH domain protein [Thamnophis sirtalis]                        | GCF_001077635.1 | TRADD-N |
| XP_025226729.1 | TRADD_N+Death | 366 | TRADD      | vertebrata | Theropithecus gelada            | tumor necrosis factor receptor type 1-associated DEATH domain protein isoform X1 [Theropithecus gelada]                       | GCF_003255815.1 | TRADD-N |
| KGL82346.1     | TRADD_N+Death | 307 | N309_01012 | vertebrata | Tinamus guttatus                | Tumor necrosis factor receptor type 1-associated DEATH domain protein, partial [Tinamus guttatus]                             | GCA_000705375.2 | TRADD-N |

| acc            | architecture  | len | gen.name     | taxend     | species                        | define                                                                                                         | gca             | clade   |
|----------------|---------------|-----|--------------|------------|--------------------------------|----------------------------------------------------------------------------------------------------------------|-----------------|---------|
| XP_010220336.1 | TRADD_N+Death | 306 | TRADD        | vertebrata | Tinamus guttatus               | PREDICTED: tumor necrosis factor receptor type 1-associated DEATH domain protein [Tinamus guttatus]            | GCF_000705375.1 | TRADD-N |
| XP_004371564.1 | TRADD_N+Death | 309 | LOC101341635 | vertebrata | Trichechus manatus latirostris | tumor necrosis factor receptor type 1-associated DEATH domain protein [Trichechus manatus latirostris]         | GCF_000243295.1 | TRADD-N |
| XP_006155647.1 | TRADD_N+Death | 310 | TRADD        | vertebrata | Tupaia chinensis               | PREDICTED: tumor necrosis factor receptor type 1-associated DEATH domain protein isoform X2 [Tupaia chinensis] | GCF_000334495.1 | TRADD-N |
| XP_006155649.2 | TRADD_N+Death | 318 | TRADD        | vertebrata | Tupaia chinensis               | PREDICTED: tumor necrosis factor receptor type 1-associated DEATH domain protein isoform X1 [Tupaia chinensis] | GCF_000334495.1 | TRADD-N |
| XP_019791250.1 | TRADD_N+Death | 314 | TRADD        | vertebrata | Tursiops truncatus             | PREDICTED: tumor necrosis factor receptor type 1-associated DEATH domain protein [Tursiops truncatus]          | GCF_001922835.1 | TRADD-N |
| KFV45478.1     | TRADD_N+Death | 306 | N341_10343   | vertebrata | Tyto alba                      | Tumor necrosis factor receptor type 1-associated DEATH domain protein, partial [Tyto alba]                     | GCA_000687205.1 | TRADD-N |
| XP_009975372.1 | TRADD_N+Death | 305 | TRADD        | vertebrata | Tyto alba                      | PREDICTED: tumor necrosis factor receptor type 1-associated DEATH domain protein [Tyto alba]                   | GCF_000687205.1 | TRADD-N |
| XP_026269046.1 | TRADD_N+Death | 314 | Tradd        | vertebrata | Urocitellus parryii            | tumor necrosis factor receptor type 1-associated DEATH domain protein [Urocitellus parryii]                    | GCF_003426925.1 | TRADD-N |
| XP_026350765.1 | TRADD_N+Death | 325 | TRADD        | vertebrata | Ursus arctos horribilis        | tumor necrosis factor receptor type 1-associated DEATH domain protein isoform X1 [Ursus arctos horribilis]     | GCF_003584765.1 | TRADD-N |
| XP_026350766.1 | TRADD_N+Death | 314 | TRADD        | vertebrata | Ursus arctos horribilis        | tumor necrosis factor receptor type 1-associated DEATH domain protein isoform X2 [Ursus arctos horribilis]     | GCF_003584765.1 | TRADD-N |
| XP_008700708.1 | TRADD_N+Death | 325 | TRADD        | vertebrata | Ursus maritimus                | PREDICTED: tumor necrosis factor receptor type 1-associated DEATH domain protein isoform X1 [Ursus maritimus]  | GCF_000687225.1 | TRADD-N |
| XP_008700710.1 | TRADD_N+Death | 314 | TRADD        | vertebrata | Ursus maritimus                | PREDICTED: tumor necrosis factor receptor type 1-associated DEATH domain protein isoform X2 [Ursus maritimus]  | GCF_000687225.1 | TRADD-N |
| XP_006203738.1 | TRADD_N+Death | 309 | TRADD        | vertebrata | Vicugna pacos                  | PREDICTED: tumor necrosis factor receptor type 1-associated DEATH domain protein [Vicugna pacos]               | GCF_000164845.2 | TRADD-N |
| XP_025867256.1 | TRADD_N+Death | 324 | TRADD        | vertebrata | Vulpes vulpes                  | tumor necrosis factor receptor type 1-associated DEATH domain protein isoform X1 [Vulpes vulpes]               | GCF_003160815.1 | TRADD-N |
| XP_025867257.1 | TRADD_N+Death | 313 | TRADD        | vertebrata | Vulpes vulpes                  | tumor necrosis factor receptor type 1-associated DEATH domain protein isoform X2 [Vulpes vulpes]               | GCF_003160815.1 | TRADD-N |
| AAI08638.1     | TRADD_N+Death | 330 | tradd        | vertebrata | Xenopus laevis                 | Tradd protein, partial [Xenopus laevis]                                                                        | -               | TRADD-N |

| acc            | architecture                          | len | gen.name     | taxend         | species                     | define                                                                                                              | gca             | clade        |
|----------------|---------------------------------------|-----|--------------|----------------|-----------------------------|---------------------------------------------------------------------------------------------------------------------|-----------------|--------------|
| XP_018113350.1 | TRADD_N+Death                         | 303 | tradd.L      | vertebrata     | Xenopus laevis              | PREDICTED: tumor necrosis factor receptor type 1-associated DEATH domain protein [Xenopus laevis]                   | GCF_001663975.1 | TRADD-N      |
| XP_002937214.1 | TRADD_N+Death                         | 303 | tradd        | vertebrata     | Xenopus tropicalis          | PREDICTED: tumor necrosis factor receptor type 1-associated DEATH domain protein [Xenopus tropicalis]               | GCF_000004195.3 | TRADD-N      |
| XP_026651507.1 | TRADD_N+Death                         | 363 | TRADD        | vertebrata     | Zonotrichia albicollis      | LOW QUALITY PROTEIN: tumor necrosis factor receptor type 1-associated DEATH domain protein [Zonotrichia albicollis] | GCF_000385455.1 | TRADD-N      |
| ROL48186.1     | DED+TRADDN-DEDD2                      | 515 | DPX16_6681   | actinopterygii | Anabailius grahami          | DNA-binding death effector domain-containing protein 2 [Anabailius grahami]                                         | GCA_003731715.1 | TRADDN-DEDD2 |
| KKF31408.1     | EF-hand+EF-hand+NLPC+DED+TRADDN-DEDD2 | 705 | EH28_02103   | actinopterygii | Larimichthys crocea         | Death effector domain-containing protein [Larimichthys crocea]                                                      | -               | TRADDN-DEDD2 |
| XP_022066547.1 | low-complexity+DED+TRADDN-DEDD2       | 376 | dedd2        | actinopterygii | Acanthochromis polyacanthus | DNA-binding death effector domain-containing protein 2 [Acanthochromis polyacanthus]                                | GCF_002109545.1 | TRADDN-DEDD2 |
| XP_022074822.1 | low-complexity+DED+TRADDN-DEDD2       | 404 | LOC110969101 | actinopterygii | Acanthochromis polyacanthus | death effector domain-containing protein-like [Acanthochromis polyacanthus]                                         | GCF_002109545.1 | TRADDN-DEDD2 |
| XP_023131844.1 | low-complexity+DED+TRADDN-DEDD2       | 381 | dedd2        | actinopterygii | Amphiprion ocellaris        | DNA-binding death effector domain-containing protein 2 isoform X1 [Amphiprion ocellaris]                            | GCF_002776465.1 | TRADDN-DEDD2 |
| XP_023131845.1 | low-complexity+DED+TRADDN-DEDD2       | 376 | dedd2        | actinopterygii | Amphiprion ocellaris        | DNA-binding death effector domain-containing protein 2 isoform X2 [Amphiprion ocellaris]                            | GCF_002776465.1 | TRADDN-DEDD2 |
| XP_023147422.1 | low-complexity+DED+TRADDN-DEDD2       | 404 | LOC111582805 | actinopterygii | Amphiprion ocellaris        | death effector domain-containing protein-like [Amphiprion ocellaris]                                                | GCF_002776465.1 | TRADDN-DEDD2 |
| XP_026223749.1 | low-complexity+DED+TRADDN-DEDD2       | 404 | dedd         | actinopterygii | Anabas testudineus          | death effector domain-containing protein [Anabas testudineus]                                                       | GCF_900324465.1 | TRADDN-DEDD2 |
| XP_026226393.1 | low-complexity+DED+TRADDN-DEDD2       | 385 | dedd2        | actinopterygii | Anabas testudineus          | DNA-binding death effector domain-containing protein 2 isoform X1 [Anabas testudineus]                              | GCF_900324465.1 | TRADDN-DEDD2 |
| XP_026226395.1 | low-complexity+DED+TRADDN-DEDD2       | 379 | dedd2        | actinopterygii | Anabas testudineus          | DNA-binding death effector domain-containing protein 2 isoform X2 [Anabas testudineus]                              | GCF_900324465.1 | TRADDN-DEDD2 |
| XP_026039561.1 | low-complexity+DED+TRADDN-DEDD2       | 382 | dedd2        | actinopterygii | Astatotilapia calliptera    | DNA-binding death effector domain-containing protein 2 isoform X1 [Astatotilapia calliptera]                        | GCF_900246225.1 | TRADDN-DEDD2 |
| XP_026039565.1 | low-complexity+DED+TRADDN-DEDD2       | 379 | dedd2        | actinopterygii | Astatotilapia calliptera    | DNA-binding death effector domain-containing protein 2 isoform X2 [Astatotilapia calliptera]                        | GCF_900246225.1 | TRADDN-DEDD2 |
| XP_007237013.2 | low-complexity+DED+TRADDN-DEDD2       | 402 | dedd         | actinopterygii | Astyanax mexicanus          | death effector domain-containing protein [Astyanax mexicanus]                                                       | GCF_000372685.2 | TRADDN-DEDD2 |
| XP_007250919.1 | low-complexity+DED+TRADDN-DEDD2       | 364 | dedd2        | actinopterygii | Astyanax mexicanus          | DNA-binding death effector domain-containing protein 2 [Astyanax mexicanus]                                         | GCF_000372685.2 | TRADDN-DEDD2 |
| XP_013868863.1 | low-complexity+DED+TRADDN-DEDD2       | 377 | dedd2        | actinopterygii | Austrofundulus limnaeus     | PREDICTED: DNA-binding death effector domain-containing protein 2 [Austrofundulus limnaeus]                         | GCF_001266775.1 | TRADDN-DEDD2 |

| acc            | architecture                    | len | gen.name        | taxend         | species                       | define                                                                                         | gca             | clade        |
|----------------|---------------------------------|-----|-----------------|----------------|-------------------------------|------------------------------------------------------------------------------------------------|-----------------|--------------|
| XP_013877708.1 | low-complexity+DED+TRADDN-DEDD2 | 402 | LOC106527389    | actinopterygii | Austrofundulus limnaeus       | PREDICTED: death effector domain-containing protein-like [Austrofundulus limnaeus]             | GCF_001266775.1 | TRADDN-DEDD2 |
| XP_020787371.1 | low-complexity+DED+TRADDN-DEDD2 | 335 | dedd            | actinopterygii | Boleophthalmus pectinirostris | death effector domain-containing protein [Boleophthalmus pectinirostris]                       | GCF_000788275.1 | TRADDN-DEDD2 |
| XP_020796249.1 | low-complexity+DED+TRADDN-DEDD2 | 384 | dedd2           | actinopterygii | Boleophthalmus pectinirostris | DNA-binding death effector domain-containing protein 2 [Boleophthalmus pectinirostris]         | GCF_000788275.1 | TRADDN-DEDD2 |
| XP_026084519.1 | low-complexity+DED+TRADDN-DEDD2 | 370 | LOC113059990    | actinopterygii | Carassius auratus             | DNA-binding death effector domain-containing protein 2-like [Carassius auratus]                | GCF_003368295.1 | TRADDN-DEDD2 |
| XP_026084564.1 | low-complexity+DED+TRADDN-DEDD2 | 370 | LOC113060014    | actinopterygii | Carassius auratus             | DNA-binding death effector domain-containing protein 2-like [Carassius auratus]                | GCF_003368295.1 | TRADDN-DEDD2 |
| XP_026105718.1 | low-complexity+DED+TRADDN-DEDD2 | 404 | LOC113077620    | actinopterygii | Carassius auratus             | death effector domain-containing protein-like [Carassius auratus]                              | GCF_003368295.1 | TRADDN-DEDD2 |
| XP_026115049.1 | low-complexity+DED+TRADDN-DEDD2 | 404 | LOC113093575    | actinopterygii | Carassius auratus             | death effector domain-containing protein-like [Carassius auratus]                              | GCF_003368295.1 | TRADDN-DEDD2 |
| XP_026125202.1 | low-complexity+DED+TRADDN-DEDD2 | 404 | LOC113107143    | actinopterygii | Carassius auratus             | death effector domain-containing protein-like [Carassius auratus]                              | GCF_003368295.1 | TRADDN-DEDD2 |
| XP_026140354.1 | low-complexity+DED+TRADDN-DEDD2 | 365 | LOC113116413    | actinopterygii | Carassius auratus             | DNA-binding death effector domain-containing protein 2-like [Carassius auratus]                | GCF_003368295.1 | TRADDN-DEDD2 |
| XP_012675412.1 | low-complexity+DED+TRADDN-DEDD2 | 393 | dedd2           | actinopterygii | Clupea harengus               | PREDICTED: DNA-binding death effector domain-containing protein 2 isoform X1 [Clupea harengus] | GCF_000966335.1 | TRADDN-DEDD2 |
| XP_012675413.1 | low-complexity+DED+TRADDN-DEDD2 | 377 | dedd2           | actinopterygii | Clupea harengus               | PREDICTED: DNA-binding death effector domain-containing protein 2 isoform X2 [Clupea harengus] | GCF_000966335.1 | TRADDN-DEDD2 |
| XP_012690051.1 | low-complexity+DED+TRADDN-DEDD2 | 414 | dedd            | actinopterygii | Clupea harengus               | PREDICTED: death effector domain-containing protein isoform X1 [Clupea harengus]               | GCF_000966335.1 | TRADDN-DEDD2 |
| XP_012690052.1 | low-complexity+DED+TRADDN-DEDD2 | 412 | dedd            | actinopterygii | Clupea harengus               | PREDICTED: death effector domain-containing protein isoform X2 [Clupea harengus]               | GCF_000966335.1 | TRADDN-DEDD2 |
| XP_008316760.1 | low-complexity+DED+TRADDN-DEDD2 | 403 | LOC103384854    | actinopterygii | Cynoglossus semilaevis        | death effector domain-containing protein [Cynoglossus semilaevis]                              | GCF_000523025.1 | TRADDN-DEDD2 |
| XP_008321053.1 | low-complexity+DED+TRADDN-DEDD2 | 375 | dedd2           | actinopterygii | Cynoglossus semilaevis        | DNA-binding death effector domain-containing protein 2 isoform X3 [Cynoglossus semilaevis]     | GCF_000523025.1 | TRADDN-DEDD2 |
| XP_015226246.1 | low-complexity+DED+TRADDN-DEDD2 | 377 | dedd2           | actinopterygii | Cyprinodon variegatus         | PREDICTED: DNA-binding death effector domain-containing protein 2 [Cyprinodon variegatus]      | GCF_000732505.1 | TRADDN-DEDD2 |
| XP_015239779.1 | low-complexity+DED+TRADDN-DEDD2 | 401 | dedd            | actinopterygii | Cyprinodon variegatus         | PREDICTED: death effector domain-containing protein [Cyprinodon variegatus]                    | GCF_000732505.1 | TRADDN-DEDD2 |
| KTF84371.1     | low-complexity+DED+TRADDN-DEDD2 | 401 | cypCar_00035271 | actinopterygii | Cyprinus carpio               | hypothetical protein cypCar_00035271 [Cyprinus carpio]                                         | GCA_001270105.1 | TRADDN-DEDD2 |
| KTF94442.1     | low-complexity+DED+TRADDN-DEDD2 | 369 | cypCar_00027008 | actinopterygii | Cyprinus carpio               | hypothetical protein cypCar_00027008 [Cyprinus carpio]                                         | GCA_001270105.1 | TRADDN-DEDD2 |

| acc            | architecture                    | len | gen.name                     | taxend         | species                  | define                                                                                                   | gca             | clade        |
|----------------|---------------------------------|-----|------------------------------|----------------|--------------------------|----------------------------------------------------------------------------------------------------------|-----------------|--------------|
| XP_018936189.1 | low-complexity+DED+TRADDN-DEDD2 | 384 | LOC109063602                 | actinopterygii | Cyprinus carpio          | PREDICTED: death effector domain-containing protein-like [Cyprinus carpio]                               | GCF_000951615.1 | TRADDN-DEDD2 |
| XP_018937141.1 | low-complexity+DED+TRADDN-DEDD2 | 404 | LOC109064552                 | actinopterygii | Cyprinus carpio          | PREDICTED: death effector domain-containing protein-like [Cyprinus carpio]                               | GCF_000951615.1 | TRADDN-DEDD2 |
| XP_018973526.1 | low-complexity+DED+TRADDN-DEDD2 | 370 | dedd2                        | actinopterygii | Cyprinus carpio          | PREDICTED: DNA-binding death effector domain-containing protein 2 [Cyprinus carpio]                      | GCF_000951615.1 | TRADDN-DEDD2 |
| AAF66963.1     | low-complexity+DED+TRADDN-DEDD2 | 369 | dedd1                        | actinopterygii | Danio rerio              | Dedd1 [Danio rerio]                                                                                      | -               | TRADDN-DEDD2 |
| NP_001002639.1 | low-complexity+DED+TRADDN-DEDD2 | 404 | fk97g03,wu:fk97g03,zgc:92202 | actinopterygii | Danio rerio              | death effector domain-containing protein [Danio rerio]                                                   | GCF_000002035.6 | TRADDN-DEDD2 |
| NP_571677.2    | low-complexity+DED+TRADDN-DEDD2 | 369 | dedd1                        | actinopterygii | Danio rerio              | DNA-binding death effector domain-containing protein 2 [Danio rerio]                                     | GCF_000002035.6 | TRADDN-DEDD2 |
| XP_026875241.1 | low-complexity+DED+TRADDN-DEDD2 | 373 | dedd2                        | actinopterygii | Electrophorus electricus | DNA-binding death effector domain-containing protein 2 [Electrophorus electricus]                        | GCF_003665695.1 | TRADDN-DEDD2 |
| XP_026881685.1 | low-complexity+DED+TRADDN-DEDD2 | 403 | LOC113587292                 | actinopterygii | Electrophorus electricus | death effector domain-containing protein-like [Electrophorus electricus]                                 | GCF_003665695.1 | TRADDN-DEDD2 |
| XP_010897051.1 | low-complexity+DED+TRADDN-DEDD2 | 413 | dedd                         | actinopterygii | Esox lucius              | PREDICTED: death effector domain-containing protein [Esox lucius]                                        | GCF_004634155.1 | TRADDN-DEDD2 |
| XP_010901875.1 | low-complexity+DED+TRADDN-DEDD2 | 396 | dedd2                        | actinopterygii | Esox lucius              | PREDICTED: DNA-binding death effector domain-containing protein 2 isoform X1 [Esox lucius]               | GCF_004634155.1 | TRADDN-DEDD2 |
| XP_010901879.1 | low-complexity+DED+TRADDN-DEDD2 | 385 | dedd2                        | actinopterygii | Esox lucius              | PREDICTED: DNA-binding death effector domain-containing protein 2 isoform X2 [Esox lucius]               | GCF_004634155.1 | TRADDN-DEDD2 |
| XP_012711055.1 | low-complexity+DED+TRADDN-DEDD2 | 404 | LOC105920096                 | actinopterygii | Fundulus heteroclitus    | death effector domain-containing protein [Fundulus heteroclitus]                                         | GCF_000826765.1 | TRADDN-DEDD2 |
| XP_012725727.1 | low-complexity+DED+TRADDN-DEDD2 | 377 | dedd2                        | actinopterygii | Fundulus heteroclitus    | DNA-binding death effector domain-containing protein 2 [Fundulus heteroclitus]                           | GCF_000826765.1 | TRADDN-DEDD2 |
| PWA24942.1     | low-complexity+DED+TRADDN-DEDD2 | 372 | CCH79_00015437               | actinopterygii | Gambusia affinis         | hypothetical protein CCH79_00015437, partial [Gambusia affinis]                                          | GCA_003097735.1 | TRADDN-DEDD2 |
| PWA27946.1     | low-complexity+DED+TRADDN-DEDD2 | 396 | CCH79_00020622               | actinopterygii | Gambusia affinis         | hypothetical protein CCH79_00020622 [Gambusia affinis]                                                   | GCA_003097735.1 | TRADDN-DEDD2 |
| XP_005925214.1 | low-complexity+DED+TRADDN-DEDD2 | 379 | LOC102289080                 | actinopterygii | Haplochromis burtoni     | PREDICTED: DNA-binding death effector domain-containing protein 2-like isoform X2 [Haplochromis burtoni] | GCF_000239415.1 | TRADDN-DEDD2 |
| XP_014189945.1 | low-complexity+DED+TRADDN-DEDD2 | 382 | LOC102289080                 | actinopterygii | Haplochromis burtoni     | PREDICTED: DNA-binding death effector domain-containing protein 2-like isoform X1 [Haplochromis burtoni] | GCF_000239415.1 | TRADDN-DEDD2 |
| XP_019747132.1 | low-complexity+DED+TRADDN-DEDD2 | 386 | LOC109528674                 | actinopterygii | Hippocampus comes        | PREDICTED: death effector domain-containing protein-like [Hippocampus comes]                             | GCF_001891065.1 | TRADDN-DEDD2 |

| acc            | architecture                    | len | gen.name     | taxend         | species                 | define                                                                                             | gca             | clade        |
|----------------|---------------------------------|-----|--------------|----------------|-------------------------|----------------------------------------------------------------------------------------------------|-----------------|--------------|
| XP_019751686.1 | low-complexity+DED+TRADDN-DEDD2 | 383 | dedd2        | actinopterygii | Hippocampus comes       | PREDICTED: DNA-binding death effector domain-containing protein 2 [Hippocampus comes]              | GCF_001891065.1 | TRADDN-DEDD2 |
| XP_017323845.1 | low-complexity+DED+TRADDN-DEDD2 | 368 | LOC108265722 | actinopterygii | Ictalurus punctatus     | PREDICTED: death effector domain-containing protein-like [Ictalurus punctatus]                     | GCF_001660625.1 | TRADDN-DEDD2 |
| XP_017325003.1 | low-complexity+DED+TRADDN-DEDD2 | 361 | dedd2        | actinopterygii | Ictalurus punctatus     | PREDICTED: DNA-binding death effector domain-containing protein 2 [Ictalurus punctatus]            | GCF_001660625.1 | TRADDN-DEDD2 |
| XP_017295691.1 | low-complexity+DED+TRADDN-DEDD2 | 402 | LOC108250358 | actinopterygii | Kryptolebias marmoratus | death effector domain-containing protein-like [Kryptolebias marmoratus]                            | GCF_001649575.1 | TRADDN-DEDD2 |
| XP_024861545.1 | low-complexity+DED+TRADDN-DEDD2 | 383 | dedd2        | actinopterygii | Kryptolebias marmoratus | DNA-binding death effector domain-containing protein 2 [Kryptolebias marmoratus]                   | GCF_001649575.1 | TRADDN-DEDD2 |
| XP_020486007.1 | low-complexity+DED+TRADDN-DEDD2 | 402 | LOC109981527 | actinopterygii | Labrus bergylta         | death effector domain-containing protein-like isoform X1 [Labrus bergylta]                         | GCF_900080235.1 | TRADDN-DEDD2 |
| XP_020486008.1 | low-complexity+DED+TRADDN-DEDD2 | 367 | LOC109981527 | actinopterygii | Labrus bergylta         | death effector domain-containing protein-like isoform X2 [Labrus bergylta]                         | -               | TRADDN-DEDD2 |
| XP_020504738.1 | low-complexity+DED+TRADDN-DEDD2 | 383 | dedd2        | actinopterygii | Labrus bergylta         | DNA-binding death effector domain-containing protein 2 [Labrus bergylta]                           | GCF_900080235.1 | TRADDN-DEDD2 |
| XP_010733338.2 | low-complexity+DED+TRADDN-DEDD2 | 388 | LOC104922252 | actinopterygii | Larimichthys crocea     | PREDICTED: DNA-binding death effector domain-containing protein 2 isoform X1 [Larimichthys crocea] | GCF_000972845.2 | TRADDN-DEDD2 |
| XP_019112568.1 | low-complexity+DED+TRADDN-DEDD2 | 402 | LOC104934583 | actinopterygii | Larimichthys crocea     | PREDICTED: death effector domain-containing protein [Larimichthys crocea]                          | GCF_000972845.2 | TRADDN-DEDD2 |
| XP_019116818.1 | low-complexity+DED+TRADDN-DEDD2 | 345 | LOC104922252 | actinopterygii | Larimichthys crocea     | PREDICTED: DNA-binding death effector domain-containing protein 2 isoform X2 [Larimichthys crocea] | GCF_000972845.2 | TRADDN-DEDD2 |
| XP_018527852.1 | low-complexity+DED+TRADDN-DEDD2 | 412 | dedd2        | actinopterygii | Lates calcarifer        | PREDICTED: DNA-binding death effector domain-containing protein 2 isoform X1 [Lates calcarifer]    | GCF_001640805.1 | TRADDN-DEDD2 |
| XP_018527853.1 | low-complexity+DED+TRADDN-DEDD2 | 410 | dedd2        | actinopterygii | Lates calcarifer        | PREDICTED: DNA-binding death effector domain-containing protein 2 isoform X2 [Lates calcarifer]    | GCF_001640805.1 | TRADDN-DEDD2 |
| XP_018527854.1 | low-complexity+DED+TRADDN-DEDD2 | 406 | dedd2        | actinopterygii | Lates calcarifer        | PREDICTED: DNA-binding death effector domain-containing protein 2 isoform X3 [Lates calcarifer]    | GCF_001640805.1 | TRADDN-DEDD2 |
| XP_018557076.1 | low-complexity+DED+TRADDN-DEDD2 | 402 | LOC108900491 | actinopterygii | Lates calcarifer        | PREDICTED: death effector domain-containing protein-like [Lates calcarifer]                        | GCF_001640805.1 | TRADDN-DEDD2 |
| XP_006625679.2 | low-complexity+DED+TRADDN-DEDD2 | 407 | LOC102686801 | actinopterygii | Lepisosteus oculatus    | PREDICTED: death effector domain-containing protein-like [Lepisosteus oculatus]                    | GCF_000242695.1 | TRADDN-DEDD2 |
| XP_026173316.1 | low-complexity+DED+TRADDN-DEDD2 | 385 | dedd2        | actinopterygii | Mastacembelus armatus   | DNA-binding death effector domain-containing protein 2 isoform X1 [Mastacembelus armatus]          | GCF_900324485.1 | TRADDN-DEDD2 |

| acc            | architecture                    | len | gen.name     | taxend         | species                  | define                                                                                                  | gca             | clade        |
|----------------|---------------------------------|-----|--------------|----------------|--------------------------|---------------------------------------------------------------------------------------------------------|-----------------|--------------|
| XP_026173317.1 | low-complexity+DED+TRADDN-DEDD2 | 380 | dedd2        | actinopterygii | Mastacembelus armatus    | DNA-binding death effector domain-containing protein 2 isoform X2 [Mastacembelus armatus]               | GCF_900324485.1 | TRADDN-DEDD2 |
| XP_026188351.1 | low-complexity+DED+TRADDN-DEDD2 | 404 | LOC113145622 | actinopterygii | Mastacembelus armatus    | death effector domain-containing protein-like isoform X1 [Mastacembelus armatus]                        | GCF_900324485.1 | TRADDN-DEDD2 |
| XP_026188355.1 | low-complexity+DED+TRADDN-DEDD2 | 369 | LOC113145622 | actinopterygii | Mastacembelus armatus    | death effector domain-containing protein-like isoform X2 [Mastacembelus armatus]                        | GCF_900324485.1 | TRADDN-DEDD2 |
| XP_004550932.1 | low-complexity+DED+TRADDN-DEDD2 | 382 | dedd2        | actinopterygii | Maylandia zebra          | DNA-binding death effector domain-containing protein 2 isoform X1 [Maylandia zebra]                     | GCF_000238955.4 | TRADDN-DEDD2 |
| XP_004550936.1 | low-complexity+DED+TRADDN-DEDD2 | 379 | dedd2        | actinopterygii | Maylandia zebra          | DNA-binding death effector domain-containing protein 2 isoform X2 [Maylandia zebra]                     | GCF_000238955.4 | TRADDN-DEDD2 |
| XP_004570968.1 | low-complexity+DED+TRADDN-DEDD2 | 404 | LOC101472216 | actinopterygii | Maylandia zebra          | death effector domain-containing protein [Maylandia zebra]                                              | GCF_000238955.4 | TRADDN-DEDD2 |
| XP_020464747.1 | low-complexity+DED+TRADDN-DEDD2 | 322 | dedd         | actinopterygii | Monopterus albus         | death effector domain-containing protein [Monopterus albus]                                             | GCF_001952655.1 | TRADDN-DEDD2 |
| XP_020466449.1 | low-complexity+DED+TRADDN-DEDD2 | 384 | dedd2        | actinopterygii | Monopterus albus         | DNA-binding death effector domain-containing protein 2 [Monopterus albus]                               | GCF_001952655.1 | TRADDN-DEDD2 |
| XP_006804371.1 | low-complexity+DED+TRADDN-DEDD2 | 404 | LOC102781701 | actinopterygii | Neolamprologus brichardi | PREDICTED: death effector domain-containing protein-like [Neolamprologus brichardi]                     | GCF_000239395.1 | TRADDN-DEDD2 |
| XP_015805772.1 | low-complexity+DED+TRADDN-DEDD2 | 376 | dedd2        | actinopterygii | Nothobranchius furzeri   | PREDICTED: DNA-binding death effector domain-containing protein 2 [Nothobranchius furzeri]              | GCF_001465895.1 | TRADDN-DEDD2 |
| XP_015822820.1 | low-complexity+DED+TRADDN-DEDD2 | 406 | LOC107390540 | actinopterygii | Nothobranchius furzeri   | PREDICTED: death effector domain-containing protein-like [Nothobranchius furzeri]                       | GCF_001465895.1 | TRADDN-DEDD2 |
| XP_010768504.1 | low-complexity+DED+TRADDN-DEDD2 | 361 | dedd2        | actinopterygii | Notothenia coriiceps     | PREDICTED: DNA-binding death effector domain-containing protein 2 [Notothenia coriiceps]                | GCF_000735185.1 | TRADDN-DEDD2 |
| XP_010783930.1 | low-complexity+DED+TRADDN-DEDD2 | 412 | dedd         | actinopterygii | Notothenia coriiceps     | PREDICTED: death effector domain-containing protein [Notothenia coriiceps]                              | GCF_000735185.1 | TRADDN-DEDD2 |
| XP_020314429.1 | low-complexity+DED+TRADDN-DEDD2 | 452 | LOC109869026 | actinopterygii | Oncorhynchus kisutch     | death effector domain-containing protein-like isoform X1 [Oncorhynchus kisutch]                         | GCF_002021735.1 | TRADDN-DEDD2 |
| XP_020314430.1 | low-complexity+DED+TRADDN-DEDD2 | 416 | LOC109869026 | actinopterygii | Oncorhynchus kisutch     | death effector domain-containing protein-like isoform X2 [Oncorhynchus kisutch]                         | GCF_002021735.1 | TRADDN-DEDD2 |
| XP_020351943.1 | low-complexity+DED+TRADDN-DEDD2 | 384 | LOC109900635 | actinopterygii | Oncorhynchus kisutch     | DNA-binding death effector domain-containing protein 2-like [Oncorhynchus kisutch]                      | GCF_002021735.1 | TRADDN-DEDD2 |
| XP_020359702.1 | low-complexity+DED+TRADDN-DEDD2 | 385 | LOC109906424 | actinopterygii | Oncorhynchus kisutch     | LOW QUALITY PROTEIN: DNA-binding death effector domain-containing protein 2-like [Oncorhynchus kisutch] | GCF_002021735.1 | TRADDN-DEDD2 |
| XP_020362029.1 | low-complexity+DED+TRADDN-DEDD2 | 414 | LOC109908047 | actinopterygii | Oncorhynchus kisutch     | death effector domain-containing protein-like [Oncorhynchus kisutch]                                    | GCF_002021735.1 | TRADDN-DEDD2 |



| acc            | architecture                    | len | gen.name          | taxend         | species                     | define                                                                                          | gca             | clade        |
|----------------|---------------------------------|-----|-------------------|----------------|-----------------------------|-------------------------------------------------------------------------------------------------|-----------------|--------------|
| CDQ74273.1     | low-complexity+DED+TRADDN-DEDD2 | 400 | GSONMT00005094001 | actinopterygii | Oncorhynchus mykiss         | unnamed protein product [Oncorhynchus mykiss]                                                   | GCA_900005705.1 | TRADDN-DEDD2 |
| XP_021422110.1 | low-complexity+DED+TRADDN-DEDD2 | 416 | LOC110492261      | actinopterygii | Oncorhynchus mykiss         | death effector domain-containing protein-like [Oncorhynchus mykiss]                             | GCF_002163495.1 | TRADDN-DEDD2 |
| XP_021446498.1 | low-complexity+DED+TRADDN-DEDD2 | 396 | LOC110509740      | actinopterygii | Oncorhynchus mykiss         | DNA-binding death effector domain-containing protein 2-like isoform X1 [Oncorhynchus mykiss]    | GCF_002163495.1 | TRADDN-DEDD2 |
| XP_021446507.1 | low-complexity+DED+TRADDN-DEDD2 | 385 | LOC110509740      | actinopterygii | Oncorhynchus mykiss         | DNA-binding death effector domain-containing protein 2-like isoform X2 [Oncorhynchus mykiss]    | GCF_002163495.1 | TRADDN-DEDD2 |
| XP_021471822.1 | low-complexity+DED+TRADDN-DEDD2 | 414 | LOC110532342      | actinopterygii | Oncorhynchus mykiss         | death effector domain-containing protein-like isoform X1 [Oncorhynchus mykiss]                  | GCF_002163495.1 | TRADDN-DEDD2 |
| XP_021471824.1 | low-complexity+DED+TRADDN-DEDD2 | 360 | LOC110532342      | actinopterygii | Oncorhynchus mykiss         | death effector domain-containing protein-like isoform X2 [Oncorhynchus mykiss]                  | GCF_002163495.1 | TRADDN-DEDD2 |
| XP_021479253.1 | low-complexity+DED+TRADDN-DEDD2 | 385 | LOC110537492      | actinopterygii | Oncorhynchus mykiss         | DNA-binding death effector domain-containing protein 2-like [Oncorhynchus mykiss]               | GCF_002163495.1 | TRADDN-DEDD2 |
| XP_024240371.1 | low-complexity+DED+TRADDN-DEDD2 | 416 | LOC112222044      | actinopterygii | Oncorhynchus tshawytscha    | death effector domain-containing protein-like [Oncorhynchus tshawytscha]                        | GCF_002872995.1 | TRADDN-DEDD2 |
| XP_024245993.1 | low-complexity+DED+TRADDN-DEDD2 | 396 | dedd2             | actinopterygii | Oncorhynchus tshawytscha    | DNA-binding death effector domain-containing protein 2 isoform X1 [Oncorhynchus tshawytscha]    | GCF_002872995.1 | TRADDN-DEDD2 |
| XP_024246002.1 | low-complexity+DED+TRADDN-DEDD2 | 385 | dedd2             | actinopterygii | Oncorhynchus tshawytscha    | DNA-binding death effector domain-containing protein 2 isoform X2 [Oncorhynchus tshawytscha]    | GCF_002872995.1 | TRADDN-DEDD2 |
| XP_003450711.2 | low-complexity+DED+TRADDN-DEDD2 | 382 | dedd2             | actinopterygii | Oreochromis niloticus       | DNA-binding death effector domain-containing protein 2 isoform X1 [Oreochromis niloticus]       | GCF_001858045.2 | TRADDN-DEDD2 |
| XP_005466163.1 | low-complexity+DED+TRADDN-DEDD2 | 404 | LOC100693850      | actinopterygii | Oreochromis niloticus       | death effector domain-containing protein [Oreochromis niloticus]                                | GCF_001858045.2 | TRADDN-DEDD2 |
| XP_025767453.1 | low-complexity+DED+TRADDN-DEDD2 | 379 | dedd2             | actinopterygii | Oreochromis niloticus       | DNA-binding death effector domain-containing protein 2 isoform X2 [Oreochromis niloticus]       | GCF_001858045.2 | TRADDN-DEDD2 |
| XP_004084396.1 | low-complexity+DED+TRADDN-DEDD2 | 389 | LOC101170239      | actinopterygii | Oryzias latipes             | death effector domain-containing protein [Oryzias latipes]                                      | GCF_002234675.1 | TRADDN-DEDD2 |
| XP_011483789.1 | low-complexity+DED+TRADDN-DEDD2 | 377 | dedd2             | actinopterygii | Oryzias latipes             | DNA-binding death effector domain-containing protein 2 [Oryzias latipes]                        | GCF_002234675.1 | TRADDN-DEDD2 |
| XP_024118697.1 | low-complexity+DED+TRADDN-DEDD2 | 395 | LOC112140028      | actinopterygii | Oryzias melastigma          | death effector domain-containing protein-like [Oryzias melastigma]                              | GCF_002922805.1 | TRADDN-DEDD2 |
| XP_024123617.1 | low-complexity+DED+TRADDN-DEDD2 | 377 | dedd2             | actinopterygii | Oryzias melastigma          | DNA-binding death effector domain-containing protein 2 [Oryzias melastigma]                     | GCF_002922805.1 | TRADDN-DEDD2 |
| XP_026795800.1 | low-complexity+DED+TRADDN-DEDD2 | 360 | dedd2             | actinopterygii | Pangasianodon hypophthalmus | DNA-binding death effector domain-containing protein 2 isoform X1 [Pangasianodon hypophthalmus] | GCF_003671635.1 | TRADDN-DEDD2 |
| XP_019944930.1 | low-complexity+DED+TRADDN-DEDD2 | 404 | LOC109630882      | actinopterygii | Paralichthys olivaceus      | PREDICTED: death effector domain-containing protein-like [Paralichthys olivaceus]               | GCF_001970005.1 | TRADDN-DEDD2 |

| acc            | architecture                    | len | gen.name     | taxend         | species                  | define                                                                                       | gca             | clade        |
|----------------|---------------------------------|-----|--------------|----------------|--------------------------|----------------------------------------------------------------------------------------------|-----------------|--------------|
| XP_019948625.1 | low-complexity+DED+TRADDN-DEDD2 | 383 | dedd2        | actinopterygii | Paralichthys olivaceus   | PREDICTED: DNA-binding death effector domain-containing protein 2 [Paralichthys olivaceus]   | GCF_001970005.1 | TRADDN-DEDD2 |
| XP_023664528.1 | low-complexity+DED+TRADDN-DEDD2 | 410 | dedd         | actinopterygii | Paramormyrops kingsleyae | death effector domain-containing protein [Paramormyrops kingsleyae]                          | GCF_002872115.1 | TRADDN-DEDD2 |
| XP_023665797.1 | low-complexity+DED+TRADDN-DEDD2 | 405 | dedd2        | actinopterygii | Paramormyrops kingsleyae | DNA-binding death effector domain-containing protein 2 isoform X1 [Paramormyrops kingsleyae] | GCF_002872115.1 | TRADDN-DEDD2 |
| XP_023665798.1 | low-complexity+DED+TRADDN-DEDD2 | 371 | dedd2        | actinopterygii | Paramormyrops kingsleyae | DNA-binding death effector domain-containing protein 2 isoform X2 [Paramormyrops kingsleyae] | GCF_002872115.1 | TRADDN-DEDD2 |
| XP_007550282.1 | low-complexity+DED+TRADDN-DEDD2 | 377 | dedd2        | actinopterygii | Poecilia formosa         | PREDICTED: DNA-binding death effector domain-containing protein 2 [Poecilia formosa]         | GCF_000485575.1 | TRADDN-DEDD2 |
| XP_007574476.1 | low-complexity+DED+TRADDN-DEDD2 | 399 | LOC103153477 | actinopterygii | Poecilia formosa         | PREDICTED: death effector domain-containing protein [Poecilia formosa]                       | GCF_000485575.1 | TRADDN-DEDD2 |
| XP_014891523.1 | low-complexity+DED+TRADDN-DEDD2 | 377 | dedd2        | actinopterygii | Poecilia latipinna       | PREDICTED: DNA-binding death effector domain-containing protein 2 [Poecilia latipinna]       | GCF_001443285.1 | TRADDN-DEDD2 |
| XP_014842625.1 | low-complexity+DED+TRADDN-DEDD2 | 377 | dedd2        | actinopterygii | Poecilia mexicana        | PREDICTED: DNA-binding death effector domain-containing protein 2 [Poecilia mexicana]        | GCF_001443325.1 | TRADDN-DEDD2 |
| XP_008413127.1 | low-complexity+DED+TRADDN-DEDD2 | 399 | LOC103468063 | actinopterygii | Poecilia reticulata      | PREDICTED: death effector domain-containing protein [Poecilia reticulata]                    | GCF_000633615.1 | TRADDN-DEDD2 |
| XP_008429549.1 | low-complexity+DED+TRADDN-DEDD2 | 377 | dedd2        | actinopterygii | Poecilia reticulata      | PREDICTED: DNA-binding death effector domain-containing protein 2 [Poecilia reticulata]      | GCF_000633615.1 | TRADDN-DEDD2 |
| XP_005731894.1 | low-complexity+DED+TRADDN-DEDD2 | 382 | LOC102204864 | actinopterygii | Pundamilia nyererei      | PREDICTED: DNA-binding death effector domain-containing protein 2-like [Pundamilia nyererei] | GCF_000239375.1 | TRADDN-DEDD2 |
| XP_005745959.1 | low-complexity+DED+TRADDN-DEDD2 | 404 | LOC102201469 | actinopterygii | Pundamilia nyererei      | PREDICTED: death effector domain-containing protein-like [Pundamilia nyererei]               | GCF_000239375.1 | TRADDN-DEDD2 |
| XP_017538787.1 | low-complexity+DED+TRADDN-DEDD2 | 393 | LOC108411641 | actinopterygii | Pygocentrus nattereri    | PREDICTED: death effector domain-containing protein-like [Pygocentrus nattereri]             | GCF_001682695.1 | TRADDN-DEDD2 |
| XP_017561563.1 | low-complexity+DED+TRADDN-DEDD2 | 362 | dedd2        | actinopterygii | Pygocentrus nattereri    | PREDICTED: DNA-binding death effector domain-containing protein 2 [Pygocentrus nattereri]    | GCF_001682695.1 | TRADDN-DEDD2 |
| XP_013990771.1 | low-complexity+DED+TRADDN-DEDD2 | 416 | LOC106566840 | actinopterygii | Salmo salar              | PREDICTED: death effector domain-containing protein-like [Salmo salar]                       | GCF_000233375.1 | TRADDN-DEDD2 |
| XP_014001232.1 | low-complexity+DED+TRADDN-DEDD2 | 416 | LOC106572035 | actinopterygii | Salmo salar              | PREDICTED: death effector domain-containing protein-like [Salmo salar]                       | GCF_000233375.1 | TRADDN-DEDD2 |
| XP_014008769.1 | low-complexity+DED+TRADDN-DEDD2 | 396 | dedd2        | actinopterygii | Salmo salar              | PREDICTED: DNA-binding death effector domain-containing protein 2 isoform X1 [Salmo salar]   | GCF_000233375.1 | TRADDN-DEDD2 |

| acc            | architecture                    | len | gen.name      | taxend         | species                  | define                                                                                              | gca             | clade        |
|----------------|---------------------------------|-----|---------------|----------------|--------------------------|-----------------------------------------------------------------------------------------------------|-----------------|--------------|
| XP_014008786.1 | low-complexity+DED+TRADDN-DEDD2 | 385 | dedd2         | actinopterygii | Salmo salar              | PREDICTED: DNA-binding death effector domain-containing protein 2 isoform X2 [Salmo salar]          | GCF_000233375.1 | TRADDN-DEDD2 |
| XP_014057310.1 | low-complexity+DED+TRADDN-DEDD2 | 396 | LOC106605858  | actinopterygii | Salmo salar              | PREDICTED: DNA-binding death effector domain-containing protein 2-like isoform X1 [Salmo salar]     | GCF_000233375.1 | TRADDN-DEDD2 |
| XP_014057312.1 | low-complexity+DED+TRADDN-DEDD2 | 385 | LOC106605858  | actinopterygii | Salmo salar              | PREDICTED: DNA-binding death effector domain-containing protein 2-like isoform X2 [Salmo salar]     | GCF_000233375.1 | TRADDN-DEDD2 |
| XP_023846965.1 | low-complexity+DED+TRADDN-DEDD2 | 360 | LOC111966504  | actinopterygii | Salvelinus alpinus       | death effector domain-containing protein isoform X2 [Salvelinus alpinus]                            | GCF_002910315.2 | TRADDN-DEDD2 |
| XP_023862080.1 | low-complexity+DED+TRADDN-DEDD2 | 416 | LOC111977050  | actinopterygii | Salvelinus alpinus       | death effector domain-containing protein [Salvelinus alpinus]                                       | GCF_002910315.2 | TRADDN-DEDD2 |
| XP_023996466.1 | low-complexity+DED+TRADDN-DEDD2 | 399 | LOC112073403  | actinopterygii | Salvelinus alpinus       | DNA-binding death effector domain-containing protein 2-like isoform X1 [Salvelinus alpinus]         | GCF_002910315.2 | TRADDN-DEDD2 |
| XP_023996469.1 | low-complexity+DED+TRADDN-DEDD2 | 385 | LOC112073403  | actinopterygii | Salvelinus alpinus       | DNA-binding death effector domain-containing protein 2-like isoform X2 [Salvelinus alpinus]         | GCF_002910315.2 | TRADDN-DEDD2 |
| KPP74621.1     | low-complexity+DED+TRADDN-DEDD2 | 411 | Z043_106207   | actinopterygii | Scleropages formosus     | death effector domain-containing protein-like [Scleropages formosus]                                | GCA_001005745.2 | TRADDN-DEDD2 |
| XP_018587534.1 | low-complexity+DED+TRADDN-DEDD2 | 435 | dedd2         | actinopterygii | Scleropages formosus     | PREDICTED: DNA-binding death effector domain-containing protein 2 isoform X1 [Scleropages formosus] | -               | TRADDN-DEDD2 |
| XP_018587535.1 | low-complexity+DED+TRADDN-DEDD2 | 385 | dedd2         | actinopterygii | Scleropages formosus     | PREDICTED: DNA-binding death effector domain-containing protein 2 isoform X2 [Scleropages formosus] | -               | TRADDN-DEDD2 |
| XP_018615687.1 | low-complexity+DED+TRADDN-DEDD2 | 407 | dedd          | actinopterygii | Scleropages formosus     | PREDICTED: death effector domain-containing protein [Scleropages formosus]                          | GCF_900964775.1 | TRADDN-DEDD2 |
| AWO96347.1     | low-complexity+DED+TRADDN-DEDD2 | 381 | SMAX5B_012179 | actinopterygii | Scophthalmus maximus     | putative DNA-binding death effector domain-containing protein 2 isoform 2 [Scophthalmus maximus]    | GCA_003186165.1 | TRADDN-DEDD2 |
| AWP09177.1     | low-complexity+DED+TRADDN-DEDD2 | 404 | SMAX5B_000525 | actinopterygii | Scophthalmus maximus     | putative death effector domain-containing protein [Scophthalmus maximus]                            | GCA_003186165.1 | TRADDN-DEDD2 |
| XP_022612372.1 | low-complexity+DED+TRADDN-DEDD2 | 382 | dedd2         | actinopterygii | Seriola dumerili         | DNA-binding death effector domain-containing protein 2 isoform X1 [Seriola dumerili]                | GCF_002260705.1 | TRADDN-DEDD2 |
| XP_022612374.1 | low-complexity+DED+TRADDN-DEDD2 | 376 | dedd2         | actinopterygii | Seriola dumerili         | DNA-binding death effector domain-containing protein 2 isoform X2 [Seriola dumerili]                | GCF_002260705.1 | TRADDN-DEDD2 |
| XP_022617410.1 | low-complexity+DED+TRADDN-DEDD2 | 404 | LOC111233792  | actinopterygii | Seriola dumerili         | death effector domain-containing protein-like [Seriola dumerili]                                    | GCF_002260705.1 | TRADDN-DEDD2 |
| XP_023267293.1 | low-complexity+DED+TRADDN-DEDD2 | 404 | LOC111658850  | actinopterygii | Seriola lalandi dorsalis | death effector domain-containing protein-like [Seriola lalandi dorsalis]                            | GCF_002814215.1 | TRADDN-DEDD2 |
| XP_023285668.1 | low-complexity+DED+TRADDN-DEDD2 | 411 | dedd2         | actinopterygii | Seriola lalandi dorsalis | DNA-binding death effector domain-containing protein 2 isoform X1 [Seriola lalandi dorsalis]        | GCF_002814215.1 | TRADDN-DEDD2 |

| acc            | architecture                    | len | gen.name     | taxend         | species                      | define                                                                                                           | gca             | clade        |
|----------------|---------------------------------|-----|--------------|----------------|------------------------------|------------------------------------------------------------------------------------------------------------------|-----------------|--------------|
| XP_023285669.1 | low-complexity+DED+TRADDN-DEDD2 | 405 | dedd2        | actinopterygii | Seriola lalandi dorsalis     | DNA-binding death effector domain-containing protein 2 isoform X2 [Seriola lalandi dorsalis]                     | GCF_002814215.1 | TRADDN-DEDD2 |
| XP_023285670.1 | low-complexity+DED+TRADDN-DEDD2 | 381 | dedd2        | actinopterygii | Seriola lalandi dorsalis     | DNA-binding death effector domain-containing protein 2 isoform X3 [Seriola lalandi dorsalis]                     | GCF_002814215.1 | TRADDN-DEDD2 |
| XP_016311309.1 | low-complexity+DED+TRADDN-DEDD2 | 404 | LOC107665071 | actinopterygii | Sinocyclocheilus anshuiensis | PREDICTED: death effector domain-containing protein-like isoform X1 [Sinocyclocheilus anshuiensis]               | GCF_001515605.1 | TRADDN-DEDD2 |
| XP_016319562.1 | low-complexity+DED+TRADDN-DEDD2 | 370 | LOC107671190 | actinopterygii | Sinocyclocheilus anshuiensis | PREDICTED: DNA-binding death effector domain-containing protein 2-like isoform X1 [Sinocyclocheilus anshuiensis] | GCF_001515605.1 | TRADDN-DEDD2 |
| XP_016319564.1 | low-complexity+DED+TRADDN-DEDD2 | 367 | LOC107671190 | actinopterygii | Sinocyclocheilus anshuiensis | PREDICTED: DNA-binding death effector domain-containing protein 2-like isoform X2 [Sinocyclocheilus anshuiensis] | GCF_001515605.1 | TRADDN-DEDD2 |
| XP_016355877.1 | low-complexity+DED+TRADDN-DEDD2 | 404 | LOC107699191 | actinopterygii | Sinocyclocheilus anshuiensis | PREDICTED: death effector domain-containing protein-like [Sinocyclocheilus anshuiensis]                          | GCF_001515605.1 | TRADDN-DEDD2 |
| XP_016357225.1 | low-complexity+DED+TRADDN-DEDD2 | 370 | LOC107700182 | actinopterygii | Sinocyclocheilus anshuiensis | PREDICTED: DNA-binding death effector domain-containing protein 2-like [Sinocyclocheilus anshuiensis]            | GCF_001515605.1 | TRADDN-DEDD2 |
| XP_016088881.1 | low-complexity+DED+TRADDN-DEDD2 | 370 | LOC107551690 | actinopterygii | Sinocyclocheilus grahami     | PREDICTED: DNA-binding death effector domain-containing protein 2-like [Sinocyclocheilus grahami]                | GCF_001515645.1 | TRADDN-DEDD2 |
| XP_016123220.1 | low-complexity+DED+TRADDN-DEDD2 | 370 | LOC107582037 | actinopterygii | Sinocyclocheilus grahami     | PREDICTED: DNA-binding death effector domain-containing protein 2-like isoform X1 [Sinocyclocheilus grahami]     | GCF_001515645.1 | TRADDN-DEDD2 |
| XP_016123221.1 | low-complexity+DED+TRADDN-DEDD2 | 367 | LOC107582037 | actinopterygii | Sinocyclocheilus grahami     | PREDICTED: DNA-binding death effector domain-containing protein 2-like isoform X2 [Sinocyclocheilus grahami]     | GCF_001515645.1 | TRADDN-DEDD2 |
| XP_016151315.1 | low-complexity+DED+TRADDN-DEDD2 | 404 | LOC107603111 | actinopterygii | Sinocyclocheilus grahami     | PREDICTED: death effector domain-containing protein-like [Sinocyclocheilus grahami]                              | GCF_001515645.1 | TRADDN-DEDD2 |
| XP_016379669.1 | low-complexity+DED+TRADDN-DEDD2 | 370 | LOC107717438 | actinopterygii | Sinocyclocheilus rhinoceros  | PREDICTED: DNA-binding death effector domain-containing protein 2-like [Sinocyclocheilus rhinoceros]             | GCF_001515625.1 | TRADDN-DEDD2 |
| XP_016387604.1 | low-complexity+DED+TRADDN-DEDD2 | 370 | LOC107723479 | actinopterygii | Sinocyclocheilus rhinoceros  | PREDICTED: DNA-binding death effector domain-containing protein 2-like isoform X1 [Sinocyclocheilus rhinoceros]  | GCF_001515625.1 | TRADDN-DEDD2 |
| XP_016387606.1 | low-complexity+DED+TRADDN-DEDD2 | 367 | LOC107723479 | actinopterygii | Sinocyclocheilus rhinoceros  | PREDICTED: DNA-binding death effector domain-containing protein 2-like isoform X2 [Sinocyclocheilus rhinoceros]  | GCF_001515625.1 | TRADDN-DEDD2 |
| XP_016427542.1 | low-complexity+DED+TRADDN-DEDD2 | 404 | LOC107755304 | actinopterygii | Sinocyclocheilus rhinoceros  | PREDICTED: death effector domain-containing protein-like [Sinocyclocheilus rhinoceros]                           | GCF_001515625.1 | TRADDN-DEDD2 |

| acc            | architecture                    | len  | gen.name             | taxend         | species                     | define                                                                                              | gca             | clade        |
|----------------|---------------------------------|------|----------------------|----------------|-----------------------------|-----------------------------------------------------------------------------------------------------|-----------------|--------------|
| XP_008298216.1 | low-complexity+DED+TRADDN-DEDD2 | 382  | dedd2                | actinopterygii | Stegastes partitus          | PREDICTED: DNA-binding death effector domain-containing protein 2 isoform X1 [Stegastes partitus]   | GCF_000690725.1 | TRADDN-DEDD2 |
| XP_008298217.1 | low-complexity+DED+TRADDN-DEDD2 | 376  | dedd2                | actinopterygii | Stegastes partitus          | PREDICTED: DNA-binding death effector domain-containing protein 2 isoform X2 [Stegastes partitus]   | GCF_000690725.1 | TRADDN-DEDD2 |
| XP_008303019.1 | low-complexity+DED+TRADDN-DEDD2 | 404  | LOC103374682         | actinopterygii | Stegastes partitus          | PREDICTED: death effector domain-containing protein-like [Stegastes partitus]                       | GCF_000690725.1 | TRADDN-DEDD2 |
| XP_003979667.2 | low-complexity+DED+TRADDN-DEDD2 | 386  | dedd                 | actinopterygii | Takifugu rubripes           | PREDICTED: death effector domain-containing protein [Takifugu rubripes]                             | GCF_901000725.2 | TRADDN-DEDD2 |
| XP_011604270.1 | low-complexity+DED+TRADDN-DEDD2 | 388  | dedd2                | actinopterygii | Takifugu rubripes           | PREDICTED: DNA-binding death effector domain-containing protein 2 [Takifugu rubripes]               | -               | TRADDN-DEDD2 |
| CAF89497.1     | low-complexity+DED+TRADDN-DEDD2 | 358  | GSTEN:00003422:G:001 | actinopterygii | Tetraodon nigroviridis      | unnamed protein product, partial [Tetraodon nigroviridis]                                           | GCA_000180735.1 | TRADDN-DEDD2 |
| XP_005816364.1 | low-complexity+DED+TRADDN-DEDD2 | 399  | LOC102229203         | actinopterygii | Xiphophorus maculatus       | death effector domain-containing protein-like [Xiphophorus maculatus]                               | GCF_002775205.1 | TRADDN-DEDD2 |
| XP_014324194.1 | low-complexity+DED+TRADDN-DEDD2 | 377  | dedd2                | actinopterygii | Xiphophorus maculatus       | DNA-binding death effector domain-containing protein 2 [Xiphophorus maculatus]                      | GCF_002775205.1 | TRADDN-DEDD2 |
| KTG36075.1     | TRADDN-DEDD2                    | 156  | cypCar_00002981      | actinopterygii | Cyprinus carpio             | hypothetical protein cypCar_00002981 [Cyprinus carpio]                                              | GCA_001270105.1 | TRADDN-DEDD2 |
| XP_018973535.1 | TRADDN-DEDD2                    | 144  | LOC109104702         | actinopterygii | Cyprinus carpio             | PREDICTED: death effector domain-containing protein-like [Cyprinus carpio]                          | GCF_000951615.1 | TRADDN-DEDD2 |
| XP_006802877.1 | TRADDN-DEDD2                    | 171  | LOC102797878         | actinopterygii | Neolamprologus brichardi    | PREDICTED: death effector domain-containing protein-like [Neolamprologus brichardi]                 | GCF_000239395.1 | TRADDN-DEDD2 |
| XP_026768191.1 | TRADDN-DEDD2                    | 173  | LOC113525802         | actinopterygii | Pangasianodon hypophthalmus | death effector domain-containing protein-like, partial [Pangasianodon hypophthalmus]                | GCF_003671635.1 | TRADDN-DEDD2 |
| KPP72408.1     | TRADDN-DEDD2                    | 259  | Z043_108600          | actinopterygii | Scleropages formosus        | hypothetical protein Z043_108600 [Scleropages formosus]                                             | GCA_001005745.2 | TRADDN-DEDD2 |
| XP_016431135.1 | TRADDN-DEDD2                    | 206  | LOC107758014         | actinopterygii | Sinocyclocheilus rhinoceros | PREDICTED: death effector domain-containing protein-like [Sinocyclocheilus rhinoceros]              | GCF_001515625.1 | TRADDN-DEDD2 |
| XP_015191868.1 | TRADDN-DEDD2+Coiled-coil        | 389  | dedd2                | actinopterygii | Lepisosteus oculatus        | PREDICTED: DNA-binding death effector domain-containing protein 2 isoform X2 [Lepisosteus oculatus] | GCF_000242695.1 | TRADDN-DEDD2 |
| XP_022045877.1 | TRADDN-NCOA6                    | 2395 | ncoa6                | actinopterygii | Acanthochromis polyacanthus | nuclear receptor coactivator 6 [Acanthochromis polyacanthus]                                        | GCF_002109545.1 | TRADDN-NCOA6 |
| XP_023137646.1 | TRADDN-NCOA6                    | 2382 | ncoa6                | actinopterygii | Amphiprion ocellaris        | nuclear receptor coactivator 6 isoform X1 [Amphiprion ocellaris]                                    | GCF_002776465.1 | TRADDN-NCOA6 |
| XP_023137647.1 | TRADDN-NCOA6                    | 2368 | ncoa6                | actinopterygii | Amphiprion ocellaris        | nuclear receptor coactivator 6 isoform X2 [Amphiprion ocellaris]                                    | GCF_002776465.1 | TRADDN-NCOA6 |
| XP_022522166.1 | TRADDN-NCOA6                    | 2330 | LOC103028954         | actinopterygii | Astyanax mexicanus          | LOW QUALITY PROTEIN: nuclear receptor coactivator 6-like [Astyanax mexicanus]                       | GCF_000372685.2 | TRADDN-NCOA6 |

| acc            | architecture | len  | gen.name        | taxend         | species                       | define                                                                              | gca             | clade        |
|----------------|--------------|------|-----------------|----------------|-------------------------------|-------------------------------------------------------------------------------------|-----------------|--------------|
| XP_013872715.1 | TRADDN-NCOA6 | 2329 | LOC106523732    | actinopterygii | Austrofundulus limnaeus       | PREDICTED: nuclear receptor coactivator 6-like isoform X1 [Austrofundulus limnaeus] | GCF_001266775.1 | TRADDN-NCOA6 |
| XP_013872725.1 | TRADDN-NCOA6 | 2328 | LOC106523732    | actinopterygii | Austrofundulus limnaeus       | PREDICTED: nuclear receptor coactivator 6-like isoform X2 [Austrofundulus limnaeus] | GCF_001266775.1 | TRADDN-NCOA6 |
| XP_013872733.1 | TRADDN-NCOA6 | 2315 | LOC106523732    | actinopterygii | Austrofundulus limnaeus       | PREDICTED: nuclear receptor coactivator 6-like isoform X3 [Austrofundulus limnaeus] | GCF_001266775.1 | TRADDN-NCOA6 |
| XP_020785811.1 | TRADDN-NCOA6 | 2189 | ncoa6           | actinopterygii | Boleophthalmus pectinirostris | nuclear receptor coactivator 6 [Boleophthalmus pectinirostris]                      | GCF_000788275.1 | TRADDN-NCOA6 |
| XP_012687590.1 | TRADDN-NCOA6 | 657  | LOC105904278    | actinopterygii | Clupea harengus               | PREDICTED: nuclear receptor coactivator 6-like [Clupea harengus]                    | GCF_000966335.1 | TRADDN-NCOA6 |
| XP_024915498.1 | TRADDN-NCOA6 | 530  | LOC112487660    | actinopterygii | Cynoglossus semilaevis        | nuclear receptor coactivator 6-like isoform X1 [Cynoglossus semilaevis]             | GCF_000523025.1 | TRADDN-NCOA6 |
| XP_024915499.1 | TRADDN-NCOA6 | 529  | LOC112487660    | actinopterygii | Cynoglossus semilaevis        | nuclear receptor coactivator 6-like isoform X2 [Cynoglossus semilaevis]             | GCF_000523025.1 | TRADDN-NCOA6 |
| XP_024915500.1 | TRADDN-NCOA6 | 489  | LOC112487660    | actinopterygii | Cynoglossus semilaevis        | nuclear receptor coactivator 6-like isoform X3 [Cynoglossus semilaevis]             | GCF_000523025.1 | TRADDN-NCOA6 |
| XP_024915501.1 | TRADDN-NCOA6 | 488  | LOC112487660    | actinopterygii | Cynoglossus semilaevis        | nuclear receptor coactivator 6-like isoform X4 [Cynoglossus semilaevis]             | GCF_000523025.1 | TRADDN-NCOA6 |
| XP_015234750.1 | TRADDN-NCOA6 | 2393 | ncoa6           | actinopterygii | Cyprinodon variegatus         | PREDICTED: nuclear receptor coactivator 6 isoform X1 [Cyprinodon variegatus]        | GCF_000732505.1 | TRADDN-NCOA6 |
| XP_015234752.1 | TRADDN-NCOA6 | 2388 | ncoa6           | actinopterygii | Cyprinodon variegatus         | PREDICTED: nuclear receptor coactivator 6 isoform X2 [Cyprinodon variegatus]        | GCF_000732505.1 | TRADDN-NCOA6 |
| XP_015234753.1 | TRADDN-NCOA6 | 2379 | ncoa6           | actinopterygii | Cyprinodon variegatus         | PREDICTED: nuclear receptor coactivator 6 isoform X3 [Cyprinodon variegatus]        | GCF_000732505.1 | TRADDN-NCOA6 |
| KTF94987.1     | TRADDN-NCOA6 | 969  | cypCar_00013510 | actinopterygii | Cyprinus carpio               | hypothetical protein cypCar_00013510 [Cyprinus carpio]                              | GCA_001270105.1 | TRADDN-NCOA6 |
| KTG34246.1     | TRADDN-NCOA6 | 971  | cypCar_00039879 | actinopterygii | Cyprinus carpio               | hypothetical protein cypCar_00039879 [Cyprinus carpio]                              | GCA_001270105.1 | TRADDN-NCOA6 |
| XP_018957021.1 | TRADDN-NCOA6 | 212  | LOC109087260    | actinopterygii | Cyprinus carpio               | PREDICTED: nuclear receptor coactivator 6-like [Cyprinus carpio]                    | GCF_000951615.1 | TRADDN-NCOA6 |
| XP_001918997.4 | TRADDN-NCOA6 | 2269 | ncoa6           | actinopterygii | Danio rerio                   | nuclear receptor coactivator 6 isoform X2 [Danio rerio]                             | GCF_000002035.6 | TRADDN-NCOA6 |
| XP_005170622.1 | TRADDN-NCOA6 | 2271 | ncoa6           | actinopterygii | Danio rerio                   | nuclear receptor coactivator 6 isoform X1 [Danio rerio]                             | GCF_000002035.6 | TRADDN-NCOA6 |
| XP_005170623.1 | TRADDN-NCOA6 | 2257 | ncoa6           | actinopterygii | Danio rerio                   | nuclear receptor coactivator 6 isoform X3 [Danio rerio]                             | GCF_000002035.6 | TRADDN-NCOA6 |
| XP_010874177.1 | TRADDN-NCOA6 | 2306 | ncoa6           | actinopterygii | Esox lucius                   | PREDICTED: nuclear receptor coactivator 6 isoform X1 [Esox lucius]                  | GCF_004634155.1 | TRADDN-NCOA6 |
| XP_019907388.1 | TRADDN-NCOA6 | 2302 | ncoa6           | actinopterygii | Esox lucius                   | PREDICTED: nuclear receptor coactivator 6 isoform X2 [Esox lucius]                  | GCF_004634155.1 | TRADDN-NCOA6 |
| XP_019907389.1 | TRADDN-NCOA6 | 2292 | ncoa6           | actinopterygii | Esox lucius                   | PREDICTED: nuclear receptor coactivator 6 isoform X3 [Esox lucius]                  | GCF_004634155.1 | TRADDN-NCOA6 |

| acc            | architecture | len  | gen.name       | taxend         | species                 | define                                                                                 | gca             | clade        |
|----------------|--------------|------|----------------|----------------|-------------------------|----------------------------------------------------------------------------------------|-----------------|--------------|
| XP_019907390.1 | TRADDN-NCOA6 | 2255 | ncoa6          | actinopterygii | Esox lucius             | PREDICTED: nuclear receptor coactivator 6 isoform X4 [Esox lucius]                     | GCF_004634155.1 | TRADDN-NCOA6 |
| XP_012717724.1 | TRADDN-NCOA6 | 2344 | LOC105926085   | actinopterygii | Fundulus heteroclitus   | nuclear receptor coactivator 6-like isoform X1 [Fundulus heteroclitus]                 | GCF_000826765.1 | TRADDN-NCOA6 |
| XP_012717726.1 | TRADDN-NCOA6 | 2332 | LOC105926085   | actinopterygii | Fundulus heteroclitus   | nuclear receptor coactivator 6-like isoform X3 [Fundulus heteroclitus]                 | GCF_000826765.1 | TRADDN-NCOA6 |
| XP_021171975.1 | TRADDN-NCOA6 | 2341 | LOC105926085   | actinopterygii | Fundulus heteroclitus   | nuclear receptor coactivator 6-like isoform X2 [Fundulus heteroclitus]                 | GCF_000826765.1 | TRADDN-NCOA6 |
| PWA31822.1     | TRADDN-NCOA6 | 973  | CCH79_00006734 | actinopterygii | Gambusia affinis        | hypothetical protein CCH79_00006734 [Gambusia affinis]                                 | GCA_003097735.1 | TRADDN-NCOA6 |
| XP_014194868.1 | TRADDN-NCOA6 | 2281 | ncoa6          | actinopterygii | Haplochromis burtoni    | PREDICTED: nuclear receptor coactivator 6 [Haplochromis burtoni]                       | GCF_000239415.1 | TRADDN-NCOA6 |
| XP_019724052.1 | TRADDN-NCOA6 | 2333 | ncoa6          | actinopterygii | Hippocampus comes       | PREDICTED: nuclear receptor coactivator 6 [Hippocampus comes]                          | GCF_001891065.1 | TRADDN-NCOA6 |
| XP_017342455.1 | TRADDN-NCOA6 | 2282 | ncoa6          | actinopterygii | Ictalurus punctatus     | PREDICTED: nuclear receptor coactivator 6 isoform X1 [Ictalurus punctatus]             | GCF_001660625.1 | TRADDN-NCOA6 |
| XP_017342456.1 | TRADDN-NCOA6 | 2280 | ncoa6          | actinopterygii | Ictalurus punctatus     | PREDICTED: nuclear receptor coactivator 6 isoform X2 [Ictalurus punctatus]             | GCF_001660625.1 | TRADDN-NCOA6 |
| XP_017342457.1 | TRADDN-NCOA6 | 1836 | ncoa6          | actinopterygii | Ictalurus punctatus     | PREDICTED: nuclear receptor coactivator 6 isoform X3 [Ictalurus punctatus]             | GCF_001660625.1 | TRADDN-NCOA6 |
| XP_017342458.1 | TRADDN-NCOA6 | 1834 | ncoa6          | actinopterygii | Ictalurus punctatus     | PREDICTED: nuclear receptor coactivator 6 isoform X4 [Ictalurus punctatus]             | GCF_001660625.1 | TRADDN-NCOA6 |
| XP_017342459.1 | TRADDN-NCOA6 | 1828 | ncoa6          | actinopterygii | Ictalurus punctatus     | PREDICTED: nuclear receptor coactivator 6 isoform X5 [Ictalurus punctatus]             | GCF_001660625.1 | TRADDN-NCOA6 |
| XP_017270566.1 | TRADDN-NCOA6 | 2330 | ncoa6          | actinopterygii | Kryptolebias marmoratus | nuclear receptor coactivator 6 isoform X1 [Kryptolebias marmoratus]                    | GCF_001649575.1 | TRADDN-NCOA6 |
| XP_017270567.1 | TRADDN-NCOA6 | 2329 | ncoa6          | actinopterygii | Kryptolebias marmoratus | nuclear receptor coactivator 6 isoform X2 [Kryptolebias marmoratus]                    | GCF_001649575.1 | TRADDN-NCOA6 |
| XP_017270568.1 | TRADDN-NCOA6 | 2316 | ncoa6          | actinopterygii | Kryptolebias marmoratus | nuclear receptor coactivator 6 isoform X3 [Kryptolebias marmoratus]                    | GCF_001649575.1 | TRADDN-NCOA6 |
| XP_020500542.1 | TRADDN-NCOA6 | 2387 | ncoa6          | actinopterygii | Labrus bergylta         | nuclear receptor coactivator 6 [Labrus bergylta]                                       | -               | TRADDN-NCOA6 |
| XP_019112018.1 | TRADDN-NCOA6 | 2325 | ncoa6          | actinopterygii | Larimichthys crocea     | PREDICTED: nuclear receptor coactivator 6 [Larimichthys crocea]                        | -               | TRADDN-NCOA6 |
| XP_018523685.1 | TRADDN-NCOA6 | 2401 | LOC108877920   | actinopterygii | Lates calcarifer        | PREDICTED: LOW QUALITY PROTEIN: nuclear receptor coactivator 6-like [Lates calcarifer] | GCF_001640805.1 | TRADDN-NCOA6 |
| XP_015220266.1 | TRADDN-NCOA6 | 2104 | ncoa6          | actinopterygii | Lepisosteus oculatus    | PREDICTED: nuclear receptor coactivator 6 [Lepisosteus oculatus]                       | GCF_000242695.1 | TRADDN-NCOA6 |
| XP_023010653.1 | TRADDN-NCOA6 | 2277 | ncoa6          | actinopterygii | Maylandia zebra         | nuclear receptor coactivator 6 [Maylandia zebra]                                       | GCF_000238955.4 | TRADDN-NCOA6 |
| XP_020463776.1 | TRADDN-NCOA6 | 2303 | ncoa6          | actinopterygii | Monopterus albus        | nuclear receptor coactivator 6 [Monopterus albus]                                      | GCF_001952655.1 | TRADDN-NCOA6 |

| acc            | architecture | len  | gen.name          | taxend         | species                  | define                                                                               | gca             | clade        |
|----------------|--------------|------|-------------------|----------------|--------------------------|--------------------------------------------------------------------------------------|-----------------|--------------|
| XP_006796375.1 | TRADDN-NCOA6 | 2391 | LOC102789118      | actinopterygii | Neolamprologus brichardi | PREDICTED: nuclear receptor coactivator 6-like isoform X1 [Neolamprologus brichardi] | GCF_000239395.1 | TRADDN-NCOA6 |
| XP_006796376.1 | TRADDN-NCOA6 | 2377 | LOC102789118      | actinopterygii | Neolamprologus brichardi | PREDICTED: nuclear receptor coactivator 6-like isoform X2 [Neolamprologus brichardi] | GCF_000239395.1 | TRADDN-NCOA6 |
| XP_015823540.1 | TRADDN-NCOA6 | 2344 | ncoa6             | actinopterygii | Nothobranchius furzeri   | PREDICTED: nuclear receptor coactivator 6 isoform X1 [Nothobranchius furzeri]        | GCF_001465895.1 | TRADDN-NCOA6 |
| XP_015823541.1 | TRADDN-NCOA6 | 2343 | ncoa6             | actinopterygii | Nothobranchius furzeri   | PREDICTED: nuclear receptor coactivator 6 isoform X2 [Nothobranchius furzeri]        | GCF_001465895.1 | TRADDN-NCOA6 |
| XP_015823542.1 | TRADDN-NCOA6 | 2330 | ncoa6             | actinopterygii | Nothobranchius furzeri   | PREDICTED: nuclear receptor coactivator 6 isoform X3 [Nothobranchius furzeri]        | GCF_001465895.1 | TRADDN-NCOA6 |
| XP_010792648.1 | TRADDN-NCOA6 | 165  | LOC104965390      | actinopterygii | Notothenia coriiceps     | PREDICTED: nuclear receptor coactivator 6-like [Notothenia coriiceps]                | GCF_000735185.1 | TRADDN-NCOA6 |
| XP_020327030.1 | TRADDN-NCOA6 | 2292 | LOC109879268      | actinopterygii | Oncorhynchus kisutch     | nuclear receptor coactivator 6-like isoform X1 [Oncorhynchus kisutch]                | GCF_002021735.1 | TRADDN-NCOA6 |
| XP_020327031.1 | TRADDN-NCOA6 | 2291 | LOC109879268      | actinopterygii | Oncorhynchus kisutch     | nuclear receptor coactivator 6-like isoform X2 [Oncorhynchus kisutch]                | GCF_002021735.1 | TRADDN-NCOA6 |
| XP_020327032.1 | TRADDN-NCOA6 | 2244 | LOC109879268      | actinopterygii | Oncorhynchus kisutch     | nuclear receptor coactivator 6-like isoform X3 [Oncorhynchus kisutch]                | GCF_002021735.1 | TRADDN-NCOA6 |
| XP_020327843.1 | TRADDN-NCOA6 | 2371 | LOC109880027      | actinopterygii | Oncorhynchus kisutch     | nuclear receptor coactivator 6-like [Oncorhynchus kisutch]                           | GCF_002021735.1 | TRADDN-NCOA6 |
| CDQ74450.1     | TRADDN-NCOA6 | 553  | GSONMT00036928001 | actinopterygii | Oncorhynchus mykiss      | unnamed protein product [Oncorhynchus mykiss]                                        | GCA_900005705.1 | TRADDN-NCOA6 |
| CDQ90105.1     | TRADDN-NCOA6 | 186  | GSONMT00038399001 | actinopterygii | Oncorhynchus mykiss      | unnamed protein product [Oncorhynchus mykiss]                                        | GCA_900005705.1 | TRADDN-NCOA6 |
| XP_021422596.1 | TRADDN-NCOA6 | 2411 | LOC110492529      | actinopterygii | Oncorhynchus mykiss      | nuclear receptor coactivator 6-like isoform X1 [Oncorhynchus mykiss]                 | GCF_002163495.1 | TRADDN-NCOA6 |
| XP_021422597.1 | TRADDN-NCOA6 | 2410 | LOC110492529      | actinopterygii | Oncorhynchus mykiss      | nuclear receptor coactivator 6-like isoform X2 [Oncorhynchus mykiss]                 | GCF_002163495.1 | TRADDN-NCOA6 |
| XP_021422598.1 | TRADDN-NCOA6 | 2410 | LOC110492529      | actinopterygii | Oncorhynchus mykiss      | nuclear receptor coactivator 6-like isoform X3 [Oncorhynchus mykiss]                 | GCF_002163495.1 | TRADDN-NCOA6 |
| XP_021422599.1 | TRADDN-NCOA6 | 2363 | LOC110492529      | actinopterygii | Oncorhynchus mykiss      | nuclear receptor coactivator 6-like isoform X4 [Oncorhynchus mykiss]                 | GCF_002163495.1 | TRADDN-NCOA6 |
| XP_021422600.1 | TRADDN-NCOA6 | 2360 | LOC110492529      | actinopterygii | Oncorhynchus mykiss      | nuclear receptor coactivator 6-like isoform X5 [Oncorhynchus mykiss]                 | GCF_002163495.1 | TRADDN-NCOA6 |
| XP_021444583.1 | TRADDN-NCOA6 | 2304 | LOC110508399      | actinopterygii | Oncorhynchus mykiss      | nuclear receptor coactivator 6-like isoform X1 [Oncorhynchus mykiss]                 | GCF_002163495.1 | TRADDN-NCOA6 |
| XP_021444585.1 | TRADDN-NCOA6 | 2303 | LOC110508399      | actinopterygii | Oncorhynchus mykiss      | nuclear receptor coactivator 6-like isoform X2 [Oncorhynchus mykiss]                 | GCF_002163495.1 | TRADDN-NCOA6 |
| XP_021444586.1 | TRADDN-NCOA6 | 2256 | LOC110508399      | actinopterygii | Oncorhynchus mykiss      | nuclear receptor coactivator 6-like isoform X3 [Oncorhynchus mykiss]                 | GCF_002163495.1 | TRADDN-NCOA6 |
| XP_024240859.1 | TRADDN-NCOA6 | 2425 | LOC112222320      | actinopterygii | Oncorhynchus tshawytscha | nuclear receptor coactivator 6-like isoform X1 [Oncorhynchus tshawytscha]            | GCF_002872995.1 | TRADDN-NCOA6 |
| XP_024240861.1 | TRADDN-NCOA6 | 2424 | LOC112222320      | actinopterygii | Oncorhynchus tshawytscha | nuclear receptor coactivator 6-like isoform X2 [Oncorhynchus tshawytscha]            | GCF_002872995.1 | TRADDN-NCOA6 |



| acc            | architecture | len  | gen.name     | taxend         | species                  | define                                                                        | gca             | clade        |
|----------------|--------------|------|--------------|----------------|--------------------------|-------------------------------------------------------------------------------|-----------------|--------------|
| XP_024240862.1 | TRADDN-NCOA6 | 2424 | LOC112222320 | actinopterygii | Oncorhynchus tshawytscha | nuclear receptor coactivator 6-like isoform X3 [Oncorhynchus tshawytscha]     | GCF_002872995.1 | TRADDN-NCOA6 |
| XP_024240863.1 | TRADDN-NCOA6 | 2413 | LOC112222320 | actinopterygii | Oncorhynchus tshawytscha | nuclear receptor coactivator 6-like isoform X4 [Oncorhynchus tshawytscha]     | GCF_002872995.1 | TRADDN-NCOA6 |
| XP_024240864.1 | TRADDN-NCOA6 | 2377 | LOC112222320 | actinopterygii | Oncorhynchus tshawytscha | nuclear receptor coactivator 6-like isoform X5 [Oncorhynchus tshawytscha]     | GCF_002872995.1 | TRADDN-NCOA6 |
| XP_024240865.1 | TRADDN-NCOA6 | 2374 | LOC112222320 | actinopterygii | Oncorhynchus tshawytscha | nuclear receptor coactivator 6-like isoform X6 [Oncorhynchus tshawytscha]     | GCF_002872995.1 | TRADDN-NCOA6 |
| XP_024270325.1 | TRADDN-NCOA6 | 2228 | ncoa6        | actinopterygii | Oncorhynchus tshawytscha | nuclear receptor coactivator 6 isoform X1 [Oncorhynchus tshawytscha]          | GCF_002872995.1 | TRADDN-NCOA6 |
| XP_024270327.1 | TRADDN-NCOA6 | 2227 | ncoa6        | actinopterygii | Oncorhynchus tshawytscha | nuclear receptor coactivator 6 isoform X2 [Oncorhynchus tshawytscha]          | GCF_002872995.1 | TRADDN-NCOA6 |
| XP_019205106.1 | TRADDN-NCOA6 | 2385 | ncoa6        | actinopterygii | Oreochromis niloticus    | nuclear receptor coactivator 6 isoform X1 [Oreochromis niloticus]             | GCF_001858045.2 | TRADDN-NCOA6 |
| XP_019205107.1 | TRADDN-NCOA6 | 2384 | ncoa6        | actinopterygii | Oreochromis niloticus    | nuclear receptor coactivator 6 isoform X2 [Oreochromis niloticus]             | GCF_001858045.2 | TRADDN-NCOA6 |
| XP_019205108.1 | TRADDN-NCOA6 | 2371 | ncoa6        | actinopterygii | Oreochromis niloticus    | nuclear receptor coactivator 6 isoform X3 [Oreochromis niloticus]             | GCF_001858045.2 | TRADDN-NCOA6 |
| XP_011475497.2 | TRADDN-NCOA6 | 2320 | ncoa6        | actinopterygii | Oryzias latipes          | nuclear receptor coactivator 6 isoform X1 [Oryzias latipes]                   | GCF_002234675.1 | TRADDN-NCOA6 |
| XP_020560371.1 | TRADDN-NCOA6 | 2318 | ncoa6        | actinopterygii | Oryzias latipes          | nuclear receptor coactivator 6 isoform X2 [Oryzias latipes]                   | GCF_002234675.1 | TRADDN-NCOA6 |
| XP_020560372.1 | TRADDN-NCOA6 | 2306 | ncoa6        | actinopterygii | Oryzias latipes          | nuclear receptor coactivator 6 isoform X3 [Oryzias latipes]                   | GCF_002234675.1 | TRADDN-NCOA6 |
| XP_024148491.1 | TRADDN-NCOA6 | 2330 | ncoa6        | actinopterygii | Oryzias melastigma       | nuclear receptor coactivator 6 isoform X1 [Oryzias melastigma]                | GCF_002922805.1 | TRADDN-NCOA6 |
| XP_024148492.1 | TRADDN-NCOA6 | 2316 | ncoa6        | actinopterygii | Oryzias melastigma       | nuclear receptor coactivator 6 isoform X2 [Oryzias melastigma]                | GCF_002922805.1 | TRADDN-NCOA6 |
| XP_019951700.1 | TRADDN-NCOA6 | 2371 | ncoa6        | actinopterygii | Paralichthys olivaceus   | PREDICTED: nuclear receptor coactivator 6 isoform X1 [Paralichthys olivaceus] | GCF_001970005.1 | TRADDN-NCOA6 |
| XP_019951701.1 | TRADDN-NCOA6 | 2357 | ncoa6        | actinopterygii | Paralichthys olivaceus   | PREDICTED: nuclear receptor coactivator 6 isoform X2 [Paralichthys olivaceus] | GCF_001970005.1 | TRADDN-NCOA6 |
| XP_023652499.1 | TRADDN-NCOA6 | 2330 | LOC111835928 | actinopterygii | Paramormyrops kingsleyae | nuclear receptor coactivator 6-like [Paramormyrops kingsleyae]                | GCF_002872115.1 | TRADDN-NCOA6 |
| XP_023654689.1 | TRADDN-NCOA6 | 1974 | ncoa6        | actinopterygii | Paramormyrops kingsleyae | nuclear receptor coactivator 6 isoform X1 [Paramormyrops kingsleyae]          | GCF_002872115.1 | TRADDN-NCOA6 |
| XP_023654690.1 | TRADDN-NCOA6 | 1941 | ncoa6        | actinopterygii | Paramormyrops kingsleyae | nuclear receptor coactivator 6 isoform X2 [Paramormyrops kingsleyae]          | GCF_002872115.1 | TRADDN-NCOA6 |
| XP_007557741.1 | TRADDN-NCOA6 | 2361 | ncoa6        | actinopterygii | Poecilia formosa         | PREDICTED: nuclear receptor coactivator 6 isoform X1 [Poecilia formosa]       | GCF_000485575.1 | TRADDN-NCOA6 |

| acc            | architecture | len  | gen.name     | taxend         | species               | define                                                                       | gca             | clade        |
|----------------|--------------|------|--------------|----------------|-----------------------|------------------------------------------------------------------------------|-----------------|--------------|
| XP_007557742.1 | TRADDN-NCOA6 | 2360 | ncoa6        | actinopterygii | Poecilia formosa      | PREDICTED: nuclear receptor coactivator 6 isoform X2 [Poecilia formosa]      | GCF_000485575.1 | TRADDN-NCOA6 |
| XP_007557743.1 | TRADDN-NCOA6 | 2359 | ncoa6        | actinopterygii | Poecilia formosa      | PREDICTED: nuclear receptor coactivator 6 isoform X3 [Poecilia formosa]      | GCF_000485575.1 | TRADDN-NCOA6 |
| XP_007557744.1 | TRADDN-NCOA6 | 2347 | ncoa6        | actinopterygii | Poecilia formosa      | PREDICTED: nuclear receptor coactivator 6 isoform X4 [Poecilia formosa]      | GCF_000485575.1 | TRADDN-NCOA6 |
| XP_014890771.1 | TRADDN-NCOA6 | 2364 | ncoa6        | actinopterygii | Poecilia latipinna    | PREDICTED: nuclear receptor coactivator 6 isoform X1 [Poecilia latipinna]    | GCF_001443285.1 | TRADDN-NCOA6 |
| XP_014890772.1 | TRADDN-NCOA6 | 2362 | ncoa6        | actinopterygii | Poecilia latipinna    | PREDICTED: nuclear receptor coactivator 6 isoform X2 [Poecilia latipinna]    | GCF_001443285.1 | TRADDN-NCOA6 |
| XP_014890773.1 | TRADDN-NCOA6 | 2362 | ncoa6        | actinopterygii | Poecilia latipinna    | PREDICTED: nuclear receptor coactivator 6 isoform X3 [Poecilia latipinna]    | GCF_001443285.1 | TRADDN-NCOA6 |
| XP_014890774.1 | TRADDN-NCOA6 | 2361 | ncoa6        | actinopterygii | Poecilia latipinna    | PREDICTED: nuclear receptor coactivator 6 isoform X4 [Poecilia latipinna]    | GCF_001443285.1 | TRADDN-NCOA6 |
| XP_014890775.1 | TRADDN-NCOA6 | 2350 | ncoa6        | actinopterygii | Poecilia latipinna    | PREDICTED: nuclear receptor coactivator 6 isoform X5 [Poecilia latipinna]    | GCF_001443285.1 | TRADDN-NCOA6 |
| XP_014843508.1 | TRADDN-NCOA6 | 2350 | ncoa6        | actinopterygii | Poecilia mexicana     | PREDICTED: nuclear receptor coactivator 6 isoform X1 [Poecilia mexicana]     | GCF_001443325.1 | TRADDN-NCOA6 |
| XP_014843509.1 | TRADDN-NCOA6 | 2349 | ncoa6        | actinopterygii | Poecilia mexicana     | PREDICTED: nuclear receptor coactivator 6 isoform X2 [Poecilia mexicana]     | GCF_001443325.1 | TRADDN-NCOA6 |
| XP_014843510.1 | TRADDN-NCOA6 | 2348 | ncoa6        | actinopterygii | Poecilia mexicana     | PREDICTED: nuclear receptor coactivator 6 isoform X3 [Poecilia mexicana]     | GCF_001443325.1 | TRADDN-NCOA6 |
| XP_014843511.1 | TRADDN-NCOA6 | 2336 | ncoa6        | actinopterygii | Poecilia mexicana     | PREDICTED: nuclear receptor coactivator 6 isoform X4 [Poecilia mexicana]     | GCF_001443325.1 | TRADDN-NCOA6 |
| XP_008412102.1 | TRADDN-NCOA6 | 2330 | LOC103467472 | actinopterygii | Poecilia reticulata   | PREDICTED: nuclear receptor coactivator 6 isoform X1 [Poecilia reticulata]   | GCF_000633615.1 | TRADDN-NCOA6 |
| XP_008412103.1 | TRADDN-NCOA6 | 2328 | LOC103467472 | actinopterygii | Poecilia reticulata   | PREDICTED: nuclear receptor coactivator 6 isoform X2 [Poecilia reticulata]   | GCF_000633615.1 | TRADDN-NCOA6 |
| XP_008412104.1 | TRADDN-NCOA6 | 2316 | LOC103467472 | actinopterygii | Poecilia reticulata   | PREDICTED: nuclear receptor coactivator 6 isoform X3 [Poecilia reticulata]   | GCF_000633615.1 | TRADDN-NCOA6 |
| XP_013768208.1 | TRADDN-NCOA6 | 2304 | ncoa6        | actinopterygii | Pundamilia nyererei   | PREDICTED: nuclear receptor coactivator 6 [Pundamilia nyererei]              | GCF_000239375.1 | TRADDN-NCOA6 |
| XP_017553708.1 | TRADDN-NCOA6 | 2363 | ncoa6        | actinopterygii | Pygocentrus nattereri | PREDICTED: nuclear receptor coactivator 6 isoform X1 [Pygocentrus nattereri] | GCF_001682695.1 | TRADDN-NCOA6 |

| acc            | architecture | len  | gen.name      | taxend         | species                      | define                                                                                   | gca             | clade        |
|----------------|--------------|------|---------------|----------------|------------------------------|------------------------------------------------------------------------------------------|-----------------|--------------|
| XP_017553709.1 | TRADDN-NCOA6 | 2349 | ncoa6         | actinopterygii | Pygocentrus nattereri        | PREDICTED: nuclear receptor coactivator 6 isoform X2 [Pygocentrus nattereri]             | GCF_001682695.1 | TRADDN-NCOA6 |
| XP_017553710.1 | TRADDN-NCOA6 | 2319 | ncoa6         | actinopterygii | Pygocentrus nattereri        | PREDICTED: nuclear receptor coactivator 6 isoform X3 [Pygocentrus nattereri]             | GCF_001682695.1 | TRADDN-NCOA6 |
| ACI67963.1     | TRADDN-NCOA6 | 186  | NCOA6         | actinopterygii | Salmo salar                  | Nuclear receptor coactivator 6 [Salmo salar]                                             | -               | TRADDN-NCOA6 |
| XP_013990145.1 | TRADDN-NCOA6 | 1099 | LOC100196047  | actinopterygii | Salmo salar                  | PREDICTED: nuclear receptor coactivator 6, partial [Salmo salar]                         | GCF_000233375.1 | TRADDN-NCOA6 |
| XP_014047602.1 | TRADDN-NCOA6 | 2324 | LOC106600629  | actinopterygii | Salmo salar                  | PREDICTED: nuclear receptor coactivator 6-like isoform X1 [Salmo salar]                  | GCF_000233375.1 | TRADDN-NCOA6 |
| XP_014047604.1 | TRADDN-NCOA6 | 2323 | LOC106600629  | actinopterygii | Salmo salar                  | PREDICTED: nuclear receptor coactivator 6-like isoform X2 [Salmo salar]                  | GCF_000233375.1 | TRADDN-NCOA6 |
| XP_014047605.1 | TRADDN-NCOA6 | 2276 | LOC106600629  | actinopterygii | Salmo salar                  | PREDICTED: nuclear receptor coactivator 6-like isoform X3 [Salmo salar]                  | GCF_000233375.1 | TRADDN-NCOA6 |
| XP_023860801.1 | TRADDN-NCOA6 | 2401 | LOC111976261  | actinopterygii | Salvelinus alpinus           | nuclear receptor coactivator 6 isoform X1 [Salvelinus alpinus]                           | GCF_002910315.2 | TRADDN-NCOA6 |
| XP_023860803.1 | TRADDN-NCOA6 | 2400 | LOC111976261  | actinopterygii | Salvelinus alpinus           | nuclear receptor coactivator 6 isoform X2 [Salvelinus alpinus]                           | GCF_002910315.2 | TRADDN-NCOA6 |
| XP_023860804.1 | TRADDN-NCOA6 | 2400 | LOC111976261  | actinopterygii | Salvelinus alpinus           | nuclear receptor coactivator 6 isoform X3 [Salvelinus alpinus]                           | GCF_002910315.2 | TRADDN-NCOA6 |
| XP_023860805.1 | TRADDN-NCOA6 | 2355 | LOC111976261  | actinopterygii | Salvelinus alpinus           | nuclear receptor coactivator 6 isoform X4 [Salvelinus alpinus]                           | GCF_002910315.2 | TRADDN-NCOA6 |
| XP_023860806.1 | TRADDN-NCOA6 | 2350 | LOC111976261  | actinopterygii | Salvelinus alpinus           | nuclear receptor coactivator 6 isoform X5 [Salvelinus alpinus]                           | GCF_002910315.2 | TRADDN-NCOA6 |
| XP_023992312.1 | TRADDN-NCOA6 | 2336 | LOC112069250  | actinopterygii | Salvelinus alpinus           | nuclear receptor coactivator 6-like [Salvelinus alpinus]                                 | GCF_002910315.2 | TRADDN-NCOA6 |
| KPP72068.1     | TRADDN-NCOA6 | 1804 | Z043_108968   | actinopterygii | Scleropages formosus         | hypothetical protein Z043_108968 [Scleropages formosus]                                  | GCA_001005745.2 | TRADDN-NCOA6 |
| XP_018594596.1 | TRADDN-NCOA6 | 2220 | ncoa6         | actinopterygii | Scleropages formosus         | PREDICTED: nuclear receptor coactivator 6 [Scleropages formosus]                         | -               | TRADDN-NCOA6 |
| AWP09816.1     | TRADDN-NCOA6 | 2179 | SMAX5B_014610 | actinopterygii | Scophthalmus maximus         | putative nuclear receptor coactivator 6-like isoform 2 [Scophthalmus maximus]            | GCA_003186165.1 | TRADDN-NCOA6 |
| XP_022597681.1 | TRADDN-NCOA6 | 2337 | ncoa6         | actinopterygii | Seriola dumerili             | nuclear receptor coactivator 6 [Seriola dumerili]                                        | GCF_002260705.1 | TRADDN-NCOA6 |
| XP_023280848.1 | TRADDN-NCOA6 | 2397 | ncoa6         | actinopterygii | Seriola lalandi dorsalis     | nuclear receptor coactivator 6 isoform X1 [Seriola lalandi dorsalis]                     | GCF_002814215.1 | TRADDN-NCOA6 |
| XP_023280849.1 | TRADDN-NCOA6 | 2392 | ncoa6         | actinopterygii | Seriola lalandi dorsalis     | nuclear receptor coactivator 6 isoform X2 [Seriola lalandi dorsalis]                     | GCF_002814215.1 | TRADDN-NCOA6 |
| XP_023280850.1 | TRADDN-NCOA6 | 2383 | ncoa6         | actinopterygii | Seriola lalandi dorsalis     | nuclear receptor coactivator 6 isoform X3 [Seriola lalandi dorsalis]                     | GCF_002814215.1 | TRADDN-NCOA6 |
| XP_016308855.1 | TRADDN-NCOA6 | 2282 | LOC107663200  | actinopterygii | Sinocyclocheilus anshuiensis | PREDICTED: nuclear receptor coactivator 6-like isoform X1 [Sinocyclocheilus anshuiensis] | GCF_001515605.1 | TRADDN-NCOA6 |
| XP_016308857.1 | TRADDN-NCOA6 | 2280 | LOC107663200  | actinopterygii | Sinocyclocheilus anshuiensis | PREDICTED: nuclear receptor coactivator 6-like isoform X2 [Sinocyclocheilus anshuiensis] | GCF_001515605.1 | TRADDN-NCOA6 |

| acc            | architecture | len  | gen.name     | taxend         | species                      | define                                                                                   | gca             | clade        |
|----------------|--------------|------|--------------|----------------|------------------------------|------------------------------------------------------------------------------------------|-----------------|--------------|
| XP_016308858.1 | TRADDN-NCOA6 | 2272 | LOC107663200 | actinopterygii | Sinocyclocheilus anshuiensis | PREDICTED: nuclear receptor coactivator 6-like isoform X3 [Sinocyclocheilus anshuiensis] | GCF_001515605.1 | TRADDN-NCOA6 |
| XP_016308859.1 | TRADDN-NCOA6 | 2270 | LOC107663200 | actinopterygii | Sinocyclocheilus anshuiensis | PREDICTED: nuclear receptor coactivator 6-like isoform X4 [Sinocyclocheilus anshuiensis] | GCF_001515605.1 | TRADDN-NCOA6 |
| XP_016308860.1 | TRADDN-NCOA6 | 2268 | LOC107663200 | actinopterygii | Sinocyclocheilus anshuiensis | PREDICTED: nuclear receptor coactivator 6-like isoform X5 [Sinocyclocheilus anshuiensis] | GCF_001515605.1 | TRADDN-NCOA6 |
| XP_016308861.1 | TRADDN-NCOA6 | 2268 | LOC107663200 | actinopterygii | Sinocyclocheilus anshuiensis | PREDICTED: nuclear receptor coactivator 6-like isoform X6 [Sinocyclocheilus anshuiensis] | GCF_001515605.1 | TRADDN-NCOA6 |
| XP_016308862.1 | TRADDN-NCOA6 | 2256 | LOC107663200 | actinopterygii | Sinocyclocheilus anshuiensis | PREDICTED: nuclear receptor coactivator 6-like isoform X7 [Sinocyclocheilus anshuiensis] | GCF_001515605.1 | TRADDN-NCOA6 |
| XP_016308863.1 | TRADDN-NCOA6 | 2198 | LOC107663200 | actinopterygii | Sinocyclocheilus anshuiensis | PREDICTED: nuclear receptor coactivator 6-like isoform X8 [Sinocyclocheilus anshuiensis] | GCF_001515605.1 | TRADDN-NCOA6 |
| XP_016361801.1 | TRADDN-NCOA6 | 2261 | LOC107703622 | actinopterygii | Sinocyclocheilus anshuiensis | PREDICTED: nuclear receptor coactivator 6-like isoform X1 [Sinocyclocheilus anshuiensis] | GCF_001515605.1 | TRADDN-NCOA6 |
| XP_016361804.1 | TRADDN-NCOA6 | 2259 | LOC107703622 | actinopterygii | Sinocyclocheilus anshuiensis | PREDICTED: nuclear receptor coactivator 6-like isoform X2 [Sinocyclocheilus anshuiensis] | GCF_001515605.1 | TRADDN-NCOA6 |
| XP_016361806.1 | TRADDN-NCOA6 | 2257 | LOC107703622 | actinopterygii | Sinocyclocheilus anshuiensis | PREDICTED: nuclear receptor coactivator 6-like isoform X3 [Sinocyclocheilus anshuiensis] | GCF_001515605.1 | TRADDN-NCOA6 |
| XP_016361807.1 | TRADDN-NCOA6 | 2247 | LOC107703622 | actinopterygii | Sinocyclocheilus anshuiensis | PREDICTED: nuclear receptor coactivator 6-like isoform X4 [Sinocyclocheilus anshuiensis] | GCF_001515605.1 | TRADDN-NCOA6 |
| XP_016361808.1 | TRADDN-NCOA6 | 2245 | LOC107703622 | actinopterygii | Sinocyclocheilus anshuiensis | PREDICTED: nuclear receptor coactivator 6-like isoform X5 [Sinocyclocheilus anshuiensis] | GCF_001515605.1 | TRADDN-NCOA6 |
| XP_016361809.1 | TRADDN-NCOA6 | 2243 | LOC107703622 | actinopterygii | Sinocyclocheilus anshuiensis | PREDICTED: nuclear receptor coactivator 6-like isoform X6 [Sinocyclocheilus anshuiensis] | GCF_001515605.1 | TRADDN-NCOA6 |
| XP_016361810.1 | TRADDN-NCOA6 | 2243 | LOC107703622 | actinopterygii | Sinocyclocheilus anshuiensis | PREDICTED: nuclear receptor coactivator 6-like isoform X7 [Sinocyclocheilus anshuiensis] | GCF_001515605.1 | TRADDN-NCOA6 |
| XP_016361811.1 | TRADDN-NCOA6 | 2231 | LOC107703622 | actinopterygii | Sinocyclocheilus anshuiensis | PREDICTED: nuclear receptor coactivator 6-like isoform X8 [Sinocyclocheilus anshuiensis] | GCF_001515605.1 | TRADDN-NCOA6 |
| XP_016361812.1 | TRADDN-NCOA6 | 2177 | LOC107703622 | actinopterygii | Sinocyclocheilus anshuiensis | PREDICTED: nuclear receptor coactivator 6-like isoform X9 [Sinocyclocheilus anshuiensis] | GCF_001515605.1 | TRADDN-NCOA6 |
| XP_016096405.1 | TRADDN-NCOA6 | 2264 | LOC107557491 | actinopterygii | Sinocyclocheilus grahami     | PREDICTED: nuclear receptor coactivator 6-like isoform X1 [Sinocyclocheilus grahami]     | GCF_001515645.1 | TRADDN-NCOA6 |
| XP_016096407.1 | TRADDN-NCOA6 | 2180 | LOC107557491 | actinopterygii | Sinocyclocheilus grahami     | PREDICTED: nuclear receptor coactivator 6-like isoform X2 [Sinocyclocheilus grahami]     | GCF_001515645.1 | TRADDN-NCOA6 |

| acc            | architecture                                      | len  | gen.name             | taxend         | species                     | define                                                                                              | gca             | clade        |
|----------------|---------------------------------------------------|------|----------------------|----------------|-----------------------------|-----------------------------------------------------------------------------------------------------|-----------------|--------------|
| XP_016102777.1 | TRADDN-NCOA6                                      | 2250 | LOC107562623         | actinopterygii | Sinocyclocheilus grahami    | PREDICTED: nuclear receptor coactivator 6-like isoform X6 [Sinocyclocheilus grahami]                | GCF_001515645.1 | TRADDN-NCOA6 |
| XP_016387002.1 | TRADDN-NCOA6                                      | 2259 | LOC107723017         | actinopterygii | Sinocyclocheilus rhinoceros | PREDICTED: nuclear receptor coactivator 6-like [Sinocyclocheilus rhinoceros]                        | GCF_001515625.1 | TRADDN-NCOA6 |
| XP_016405793.1 | TRADDN-NCOA6                                      | 2273 | LOC107738548         | actinopterygii | Sinocyclocheilus rhinoceros | PREDICTED: nuclear receptor coactivator 6-like isoform X1 [Sinocyclocheilus rhinoceros]             | GCF_001515625.1 | TRADDN-NCOA6 |
| XP_016405795.1 | TRADDN-NCOA6                                      | 2271 | LOC107738548         | actinopterygii | Sinocyclocheilus rhinoceros | PREDICTED: nuclear receptor coactivator 6-like isoform X2 [Sinocyclocheilus rhinoceros]             | GCF_001515625.1 | TRADDN-NCOA6 |
| XP_016405796.1 | TRADDN-NCOA6                                      | 2259 | LOC107738548         | actinopterygii | Sinocyclocheilus rhinoceros | PREDICTED: nuclear receptor coactivator 6-like isoform X3 [Sinocyclocheilus rhinoceros]             | GCF_001515625.1 | TRADDN-NCOA6 |
| XP_016405797.1 | TRADDN-NCOA6                                      | 2257 | LOC107738548         | actinopterygii | Sinocyclocheilus rhinoceros | PREDICTED: nuclear receptor coactivator 6-like isoform X4 [Sinocyclocheilus rhinoceros]             | GCF_001515625.1 | TRADDN-NCOA6 |
| XP_016405798.1 | TRADDN-NCOA6                                      | 2255 | LOC107738548         | actinopterygii | Sinocyclocheilus rhinoceros | PREDICTED: nuclear receptor coactivator 6-like isoform X5 [Sinocyclocheilus rhinoceros]             | GCF_001515625.1 | TRADDN-NCOA6 |
| XP_016405799.1 | TRADDN-NCOA6                                      | 2243 | LOC107738548         | actinopterygii | Sinocyclocheilus rhinoceros | PREDICTED: nuclear receptor coactivator 6-like isoform X6 [Sinocyclocheilus rhinoceros]             | GCF_001515625.1 | TRADDN-NCOA6 |
| XP_008291864.1 | TRADDN-NCOA6                                      | 2380 | ncoa6                | actinopterygii | Stegastes partitus          | PREDICTED: nuclear receptor coactivator 6 [Stegastes partitus]                                      | GCF_000690725.1 | TRADDN-NCOA6 |
| XP_011600780.1 | TRADDN-NCOA6                                      | 2359 | ncoa6                | actinopterygii | Takifugu rubripes           | PREDICTED: nuclear receptor coactivator 6 isoform X1 [Takifugu rubripes]                            | -               | TRADDN-NCOA6 |
| XP_011600781.1 | TRADDN-NCOA6                                      | 2348 | ncoa6                | actinopterygii | Takifugu rubripes           | PREDICTED: nuclear receptor coactivator 6 isoform X2 [Takifugu rubripes]                            | -               | TRADDN-NCOA6 |
| XP_011600782.1 | TRADDN-NCOA6                                      | 1195 | ncoa6                | actinopterygii | Takifugu rubripes           | PREDICTED: nuclear receptor coactivator 6 isoform X3 [Takifugu rubripes]                            | -               | TRADDN-NCOA6 |
| CAF91445.1     | TRADDN-NCOA6                                      | 1553 | GSTEN:00006210:G:001 | actinopterygii | Tetraodon nigroviridis      | unnamed protein product [Tetraodon nigroviridis]                                                    | GCA_000180735.1 | TRADDN-NCOA6 |
| XP_023197675.1 | TRADDN-NCOA6                                      | 2317 | ncoa6                | actinopterygii | Xiphophorus maculatus       | nuclear receptor coactivator 6 [Xiphophorus maculatus]                                              | GCF_002775205.1 | TRADDN-NCOA6 |
| KKF08926.1     | TRADDN-NCOA6+Topoisom_I_N+Topoisom_I+Topo_C_assoc | 2703 | EH28_23771           | actinopterygii | Larimichthys crocea         | DNA topoisomerase 1 [Larimichthys crocea]                                                           | -               | TRADDN-NCOA6 |
| AWP09815.1     | TRADDN-NCOA6+Topoisom_I_N+Topoisom_I+Topo_C_assoc | 2848 | SMAX5B_014610        | actinopterygii | Scophthalmus maximus        | putative nuclear receptor coactivator 6-like [Scophthalmus maximus]                                 | GCA_003186165.1 | TRADDN-NCOA6 |
| XP_022072468.1 | TRADD_N+Death                                     | 292  | tradd                | actinopterygii | Acanthochromis polyacanthus | tumor necrosis factor receptor type 1-associated DEATH domain protein [Acanthochromis polyacanthus] | GCF_002109545.1 | TRADD-N      |
| XP_023140009.1 | TRADD_N+Death                                     | 292  | tradd                | actinopterygii | Amphiprion ocellaris        | tumor necrosis factor receptor type 1-associated DEATH domain protein [Amphiprion ocellaris]        | GCF_002776465.1 | TRADD-N      |
| XP_026234968.1 | TRADD_N+Death                                     | 288  | tradd                | actinopterygii | Anabas testudineus          | tumor necrosis factor receptor type 1-associated DEATH domain protein [Anabas testudineus]          | GCF_900324465.1 | TRADD-N      |

| acc            | architecture  | len | gen.name                                   | taxend         | species                       | define                                                                                                        | gca             | clade   |
|----------------|---------------|-----|--------------------------------------------|----------------|-------------------------------|---------------------------------------------------------------------------------------------------------------|-----------------|---------|
| XP_026025056.1 | TRADD_N+Death | 331 | tradd                                      | actinopterygii | Astatotilapia calliptera      | tumor necrosis factor receptor type 1-associated DEATH domain protein isoform X1 [Astatotilapia calliptera]   | GCF_900246225.1 | TRADD-N |
| XP_026025061.1 | TRADD_N+Death | 330 | tradd                                      | actinopterygii | Astatotilapia calliptera      | tumor necrosis factor receptor type 1-associated DEATH domain protein isoform X2 [Astatotilapia calliptera]   | GCF_900246225.1 | TRADD-N |
| XP_013883390.1 | TRADD_N+Death | 292 | tradd                                      | actinopterygii | Austrofundulus limnaeus       | PREDICTED: tumor necrosis factor receptor type 1-associated DEATH domain protein [Austrofundulus limnaeus]    | GCF_001266775.1 | TRADD-N |
| XP_020797264.1 | TRADD_N+Death | 286 | tradd                                      | actinopterygii | Boleophthalmus pectinirostris | tumor necrosis factor receptor type 1-associated DEATH domain protein [Boleophthalmus pectinirostris]         | GCF_000788275.1 | TRADD-N |
| XP_026067670.1 | TRADD_N+Death | 293 | tradd                                      | actinopterygii | Carassius auratus             | tumor necrosis factor receptor type 1-associated DEATH domain protein [Carassius auratus]                     | GCF_003368295.1 | TRADD-N |
| XP_026072544.1 | TRADD_N+Death | 293 | LOC113052311                               | actinopterygii | Carassius auratus             | tumor necrosis factor receptor type 1-associated DEATH domain protein-like [Carassius auratus]                | GCF_003368295.1 | TRADD-N |
| XP_012672697.1 | TRADD_N+Death | 289 | tradd                                      | actinopterygii | Clupea harengus               | PREDICTED: tumor necrosis factor receptor type 1-associated DEATH domain protein [Clupea harengus]            | GCF_000966335.1 | TRADD-N |
| XP_008308247.1 | TRADD_N+Death | 288 | tradd                                      | actinopterygii | Cynoglossus semilaevis        | tumor necrosis factor receptor type 1-associated DEATH domain protein [Cynoglossus semilaevis]                | GCF_000523025.1 | TRADD-N |
| XP_015259088.1 | TRADD_N+Death | 292 | tradd                                      | actinopterygii | Cyprinodon variegatus         | PREDICTED: tumor necrosis factor receptor type 1-associated DEATH domain protein [Cyprinodon variegatus]      | GCF_000732505.1 | TRADD-N |
| KTF84358.1     | TRADD_N+Death | 330 | cypCar_00021773                            | actinopterygii | Cyprinus carpio               | hypothetical protein cypCar_00021773, partial [Cyprinus carpio]                                               | GCA_001270105.1 | TRADD-N |
| KTF92785.1     | TRADD_N+Death | 341 | cypCar_00003717                            | actinopterygii | Cyprinus carpio               | hypothetical protein cypCar_00003717, partial [Cyprinus carpio]                                               | GCA_001270105.1 | TRADD-N |
| XP_018962454.1 | TRADD_N+Death | 291 | LOC109093186                               | actinopterygii | Cyprinus carpio               | PREDICTED: tumor necrosis factor receptor type 1-associated DEATH domain protein isoform X1 [Cyprinus carpio] | GCF_000951615.1 | TRADD-N |
| NP_571682.1    | TRADD_N+Death | 293 | hm:zehn0873,wu:fc59e02,zehn0873,zgc:103556 | actinopterygii | Danio rerio                   | tumor necrosis factor receptor type 1-associated DEATH domain protein [Danio rerio]                           | GCF_000002035.6 | TRADD-N |
| XP_026868658.1 | TRADD_N+Death | 293 | tradd                                      | actinopterygii | Electrophorus electricus      | tumor necrosis factor receptor type 1-associated DEATH domain protein [Electrophorus electricus]              | GCF_003665695.1 | TRADD-N |
| AEA39769.1     | TRADD_N+Death | 202 | -                                          | actinopterygii | Epinephelus coioides          | tumor necrosis factor receptor type 1-associated DEATH domain protein, partial [Epinephelus coioides]         | -               | TRADD-N |
| XP_010878280.1 | TRADD_N+Death | 299 | tradd                                      | actinopterygii | Esox lucius                   | PREDICTED: tumor necrosis factor receptor type 1-associated DEATH domain protein [Esox lucius]                | GCF_004634155.1 | TRADD-N |

| acc            | architecture  | len | gen.name       | taxend         | species                 | define                                                                                                             | gca             | clade   |
|----------------|---------------|-----|----------------|----------------|-------------------------|--------------------------------------------------------------------------------------------------------------------|-----------------|---------|
| XP_012736473.1 | TRADD_N+Death | 292 | tradd          | actinopterygii | Fundulus heteroclitus   | tumor necrosis factor receptor type 1-associated DEATH domain protein [Fundulus heteroclitus]                      | GCF_000826765.1 | TRADD-N |
| PWA17301.1     | TRADD_N+Death | 292 | CCH79_00010441 | actinopterygii | Gambusia affinis        | hypothetical protein CCH79_00010441, partial [Gambusia affinis]                                                    | GCA_003097735.1 | TRADD-N |
| XP_005915280.1 | TRADD_N+Death | 330 | tradd          | actinopterygii | Haplochromis burtoni    | PREDICTED: tumor necrosis factor receptor type 1-associated DEATH domain protein isoform X2 [Haplochromis burtoni] | GCF_000239415.1 | TRADD-N |
| XP_014196190.1 | TRADD_N+Death | 331 | tradd          | actinopterygii | Haplochromis burtoni    | PREDICTED: tumor necrosis factor receptor type 1-associated DEATH domain protein isoform X1 [Haplochromis burtoni] | GCF_000239415.1 | TRADD-N |
| XP_019742516.1 | TRADD_N+Death | 288 | tradd          | actinopterygii | Hippocampus comes       | PREDICTED: tumor necrosis factor receptor type 1-associated DEATH domain protein [Hippocampus comes]               | GCF_001891065.1 | TRADD-N |
| XP_017333644.1 | TRADD_N+Death | 302 | tradd          | actinopterygii | Ictalurus punctatus     | PREDICTED: tumor necrosis factor receptor type 1-associated DEATH domain protein isoform X1 [Ictalurus punctatus]  | GCF_001660625.1 | TRADD-N |
| XP_017333645.1 | TRADD_N+Death | 294 | tradd          | actinopterygii | Ictalurus punctatus     | PREDICTED: tumor necrosis factor receptor type 1-associated DEATH domain protein isoform X2 [Ictalurus punctatus]  | GCF_001660625.1 | TRADD-N |
| XP_017296772.1 | TRADD_N+Death | 290 | tradd          | actinopterygii | Kryptolebias marmoratus | tumor necrosis factor receptor type 1-associated DEATH domain protein [Kryptolebias marmoratus]                    | GCF_001649575.1 | TRADD-N |
| XP_020516801.1 | TRADD_N+Death | 291 | tradd          | actinopterygii | Labrus bergylta         | tumor necrosis factor receptor type 1-associated DEATH domain protein [Labrus bergylta]                            | GCF_900080235.1 | TRADD-N |
| XP_010743445.1 | TRADD_N+Death | 293 | tradd          | actinopterygii | Larimichthys crocea     | tumor necrosis factor receptor type 1-associated DEATH domain protein [Larimichthys crocea]                        | GCF_000972845.2 | TRADD-N |
| XP_018523584.1 | TRADD_N+Death | 290 | tradd          | actinopterygii | Lates calcarifer        | PREDICTED: tumor necrosis factor receptor type 1-associated DEATH domain protein [Lates calcarifer]                | GCF_001640805.1 | TRADD-N |
| XP_015224118.1 | TRADD_N+Death | 304 | tradd          | actinopterygii | Lepisosteus oculatus    | PREDICTED: tumor necrosis factor receptor type 1-associated DEATH domain protein [Lepisosteus oculatus]            | GCF_000242695.1 | TRADD-N |
| XP_026176095.1 | TRADD_N+Death | 292 | tradd          | actinopterygii | Mastacembelus armatus   | tumor necrosis factor receptor type 1-associated DEATH domain protein [Mastacembelus armatus]                      | GCF_900324485.1 | TRADD-N |
| XP_004543104.1 | TRADD_N+Death | 292 | tradd          | actinopterygii | Maylandia zebra         | tumor necrosis factor receptor type 1-associated DEATH domain protein [Maylandia zebra]                            | GCF_000238955.4 | TRADD-N |
| XP_020465742.1 | TRADD_N+Death | 290 | tradd          | actinopterygii | Monopterus albus        | tumor necrosis factor receptor type 1-associated DEATH domain protein [Monopterus albus]                           | GCF_001952655.1 | TRADD-N |

| acc            | architecture  | len | gen.name          | taxend         | species                     | define                                                                                                                      | gca             | clade   |
|----------------|---------------|-----|-------------------|----------------|-----------------------------|-----------------------------------------------------------------------------------------------------------------------------|-----------------|---------|
| XP_006780114.1 | TRADD_N+Death | 292 | LOC102779391      | actinopterygii | Neolamprologus brichardi    | PREDICTED: tumor necrosis factor receptor type 1-associated DEATH domain protein-like isoform X1 [Neolamprologus brichardi] | GCF_000239395.1 | TRADD-N |
| XP_015808523.1 | TRADD_N+Death | 292 | tradd             | actinopterygii | Nothobranchius furzeri      | PREDICTED: tumor necrosis factor receptor type 1-associated DEATH domain protein [Nothobranchius furzeri]                   | GCF_001465895.1 | TRADD-N |
| XP_010793143.1 | TRADD_N+Death | 293 | tradd             | actinopterygii | Notothenia coriiceps        | PREDICTED: tumor necrosis factor receptor type 1-associated DEATH domain protein [Notothenia coriiceps]                     | GCF_000735185.1 | TRADD-N |
| XP_020330116.1 | TRADD_N+Death | 299 | LOC109882432      | actinopterygii | Oncorhynchus kisutch        | tumor necrosis factor receptor type 1-associated DEATH domain protein-like [Oncorhynchus kisutch]                           | GCF_002021735.1 | TRADD-N |
| XP_020334945.1 | TRADD_N+Death | 300 | LOC109888162      | actinopterygii | Oncorhynchus kisutch        | tumor necrosis factor receptor type 1-associated DEATH domain protein [Oncorhynchus kisutch]                                | GCF_002021735.1 | TRADD-N |
| CDQ78991.1     | TRADD_N+Death | 291 | GSONMT00047171001 | actinopterygii | Oncorhynchus mykiss         | unnamed protein product [Oncorhynchus mykiss]                                                                               | GCA_900005705.1 | TRADD-N |
| NP_001118111.1 | TRADD_N+Death | 292 | tradd             | actinopterygii | Oncorhynchus mykiss         | tumor necrosis factor receptor type 1-associated DEATH domain protein [Oncorhynchus mykiss]                                 | GCF_002163495.1 | TRADD-N |
| XP_021441944.1 | TRADD_N+Death | 299 | LOC110506559      | actinopterygii | Oncorhynchus mykiss         | tumor necrosis factor receptor type 1-associated DEATH domain protein-like [Oncorhynchus mykiss]                            | GCF_002163495.1 | TRADD-N |
| XP_021460610.1 | TRADD_N+Death | 300 | tradd             | actinopterygii | Oncorhynchus mykiss         | tumor necrosis factor receptor type 1-associated DEATH domain protein isoform X1 [Oncorhynchus mykiss]                      | GCF_002163495.1 | TRADD-N |
| XP_024296035.1 | TRADD_N+Death | 299 | LOC112263724      | actinopterygii | Oncorhynchus tshawytscha    | tumor necrosis factor receptor type 1-associated DEATH domain protein-like [Oncorhynchus tshawytscha]                       | GCF_002872995.1 | TRADD-N |
| XP_003442307.1 | TRADD_N+Death | 291 | tradd             | actinopterygii | Oreochromis niloticus       | tumor necrosis factor receptor type 1-associated DEATH domain protein [Oreochromis niloticus]                               | GCF_001858045.2 | TRADD-N |
| XP_023809263.1 | TRADD_N+Death | 290 | tradd             | actinopterygii | Oryzias latipes             | tumor necrosis factor receptor type 1-associated DEATH domain protein [Oryzias latipes]                                     | GCF_002234675.1 | TRADD-N |
| XP_024151861.1 | TRADD_N+Death | 290 | tradd             | actinopterygii | Oryzias melastigma          | tumor necrosis factor receptor type 1-associated DEATH domain protein [Oryzias melastigma]                                  | GCF_002922805.1 | TRADD-N |
| ACO09635.1     | TRADD_N+Death | 292 | TRADD             | actinopterygii | Osmerus mordax              | Tumor necrosis factor receptor type 1-associated DEATH domain protein [Osmerus mordax]                                      | -               | TRADD-N |
| XP_026786398.1 | TRADD_N+Death | 294 | tradd             | actinopterygii | Pangasianodon hypophthalmus | tumor necrosis factor receptor type 1-associated DEATH domain protein [Pangasianodon hypophthalmus]                         | GCF_003671635.1 | TRADD-N |
| XP_019954258.1 | TRADD_N+Death | 322 | tradd             | actinopterygii | Paralichthys olivaceus      | PREDICTED: tumor necrosis factor receptor type 1-associated DEATH domain protein [Paralichthys olivaceus]                   | GCF_001970005.1 | TRADD-N |



| acc            | architecture  | len | gen.name      | taxend         | species                  | define                                                                                                            | gca             | clade   |
|----------------|---------------|-----|---------------|----------------|--------------------------|-------------------------------------------------------------------------------------------------------------------|-----------------|---------|
| XP_023683006.1 | TRADD_N+Death | 304 | tradd         | actinopterygii | Paramormyrops kingsleyae | tumor necrosis factor receptor type 1-associated DEATH domain protein [Paramormyrops kingsleyae]                  | GCF_002872115.1 | TRADD-N |
| XP_007574895.1 | TRADD_N+Death | 292 | tradd         | actinopterygii | Poecilia formosa         | PREDICTED: tumor necrosis factor receptor type 1-associated DEATH domain protein [Poecilia formosa]               | GCF_000485575.1 | TRADD-N |
| XP_014890432.1 | TRADD_N+Death | 292 | tradd         | actinopterygii | Poecilia latipinna       | PREDICTED: tumor necrosis factor receptor type 1-associated DEATH domain protein [Poecilia latipinna]             | GCF_001443285.1 | TRADD-N |
| XP_008403636.1 | TRADD_N+Death | 323 | tradd         | actinopterygii | Poecilia reticulata      | PREDICTED: tumor necrosis factor receptor type 1-associated DEATH domain protein [Poecilia reticulata]            | GCF_000633615.1 | TRADD-N |
| XP_005741721.1 | TRADD_N+Death | 331 | tradd         | actinopterygii | Pundamilia nyererei      | PREDICTED: tumor necrosis factor receptor type 1-associated DEATH domain protein isoform X1 [Pundamilia nyererei] | GCF_000239375.1 | TRADD-N |
| XP_005741722.1 | TRADD_N+Death | 330 | tradd         | actinopterygii | Pundamilia nyererei      | PREDICTED: tumor necrosis factor receptor type 1-associated DEATH domain protein isoform X2 [Pundamilia nyererei] | GCF_000239375.1 | TRADD-N |
| XP_017581097.1 | TRADD_N+Death | 293 | tradd         | actinopterygii | Pygocentrus nattereri    | PREDICTED: tumor necrosis factor receptor type 1-associated DEATH domain protein [Pygocentrus nattereri]          | GCF_001682695.1 | TRADD-N |
| XP_013982430.1 | TRADD_N+Death | 299 | LOC106562229  | actinopterygii | Salmo salar              | PREDICTED: tumor necrosis factor receptor type 1-associated DEATH domain protein-like [Salmo salar]               | GCF_000233375.1 | TRADD-N |
| XP_014031273.1 | TRADD_N+Death | 299 | LOC106587422  | actinopterygii | Salmo salar              | PREDICTED: tumor necrosis factor receptor type 1-associated DEATH domain protein [Salmo salar]                    | GCF_000233375.1 | TRADD-N |
| XP_023851343.1 | TRADD_N+Death | 299 | LOC111969426  | actinopterygii | Salvelinus alpinus       | tumor necrosis factor receptor type 1-associated DEATH domain protein [Salvelinus alpinus]                        | GCF_002910315.2 | TRADD-N |
| XP_023858136.1 | TRADD_N+Death | 299 | LOC111974567  | actinopterygii | Salvelinus alpinus       | tumor necrosis factor receptor type 1-associated DEATH domain protein [Salvelinus alpinus]                        | GCF_002910315.2 | TRADD-N |
| XP_018582130.1 | TRADD_N+Death | 309 | tradd         | actinopterygii | Scleropages formosus     | PREDICTED: tumor necrosis factor receptor type 1-associated DEATH domain protein [Scleropages formosus]           | GCF_900964775.1 | TRADD-N |
| AWP01632.1     | TRADD_N+Death | 292 | SMAX5B_012648 | actinopterygii | Scophthalmus maximus     | putative tumor necrosis factor receptor type 1-associated DEATH domain protein [Scophthalmus maximus]             | GCA_003186165.1 | TRADD-N |
| XP_022600264.1 | TRADD_N+Death | 292 | tradd         | actinopterygii | Seriola dumerili         | tumor necrosis factor receptor type 1-associated DEATH domain protein [Seriola dumerili]                          | GCF_002260705.1 | TRADD-N |
| XP_023251461.1 | TRADD_N+Death | 292 | tradd         | actinopterygii | Seriola lalandi dorsalis | tumor necrosis factor receptor type 1-associated DEATH domain protein [Seriola lalandi dorsalis]                  | GCF_002814215.1 | TRADD-N |

| acc            | architecture                                               | len  | gen.name             | taxend         | species                      | define                                                                                                               | gca             | clade        |
|----------------|------------------------------------------------------------|------|----------------------|----------------|------------------------------|----------------------------------------------------------------------------------------------------------------------|-----------------|--------------|
| XP_016323919.1 | TRADD_N+Death                                              | 293  | LOC107674458         | actinopterygii | Sinocyclocheilus anshuiensis | PREDICTED: tumor necrosis factor receptor type 1-associated DEATH domain protein-like [Sinocyclocheilus anshuiensis] | GCF_001515605.1 | TRADD-N      |
| XP_016357491.1 | TRADD_N+Death                                              | 293  | LOC107700380         | actinopterygii | Sinocyclocheilus anshuiensis | PREDICTED: tumor necrosis factor receptor type 1-associated DEATH domain protein [Sinocyclocheilus anshuiensis]      | GCF_001515605.1 | TRADD-N      |
| XP_016128639.1 | TRADD_N+Death                                              | 293  | LOC107585960         | actinopterygii | Sinocyclocheilus grahami     | PREDICTED: tumor necrosis factor receptor type 1-associated DEATH domain protein [Sinocyclocheilus grahami]          | GCF_001515645.1 | TRADD-N      |
| XP_016140213.1 | TRADD_N+Death                                              | 293  | LOC107594616         | actinopterygii | Sinocyclocheilus grahami     | PREDICTED: tumor necrosis factor receptor type 1-associated DEATH domain protein-like [Sinocyclocheilus grahami]     | GCF_001515645.1 | TRADD-N      |
| XP_016409644.1 | TRADD_N+Death                                              | 293  | LOC107741433         | actinopterygii | Sinocyclocheilus rhinoceros  | PREDICTED: tumor necrosis factor receptor type 1-associated DEATH domain protein-like [Sinocyclocheilus rhinoceros]  | GCF_001515625.1 | TRADD-N      |
| XP_016421433.1 | TRADD_N+Death                                              | 293  | LOC107750529         | actinopterygii | Sinocyclocheilus rhinoceros  | PREDICTED: tumor necrosis factor receptor type 1-associated DEATH domain protein [Sinocyclocheilus rhinoceros]       | GCF_001515625.1 | TRADD-N      |
| AKN80430.1     | TRADD_N+Death                                              | 293  | TRADD                | actinopterygii | Sparus aurata                | Tumor necrosis factor receptor type 1-associated DEATH domain protein [Sparus aurata]                                | -               | TRADD-N      |
| XP_008302445.1 | TRADD_N+Death                                              | 292  | tradd                | actinopterygii | Stegastes partitus           | PREDICTED: tumor necrosis factor receptor type 1-associated DEATH domain protein [Stegastes partitus]                | GCF_000690725.1 | TRADD-N      |
| XP_003970098.1 | TRADD_N+Death                                              | 292  | tradd                | actinopterygii | Takifugu rubripes            | PREDICTED: tumor necrosis factor receptor type 1-associated DEATH domain protein [Takifugu rubripes]                 | GCF_901000725.2 | TRADD-N      |
| CAF99560.1     | TRADD_N+Death                                              | 305  | GSTEN:00017689:G:001 | actinopterygii | Tetraodon nigroviridis       | unnamed protein product, partial [Tetraodon nigroviridis]                                                            | GCA_000180735.1 | TRADD-N      |
| XP_023187695.1 | TRADD_N+Death                                              | 290  | tradd                | actinopterygii | Xiphophorus maculatus        | tumor necrosis factor receptor type 1-associated DEATH domain protein [Xiphophorus maculatus]                        | GCF_002775205.1 | TRADD-N      |
| XP_027007789.1 | TRADD_N+G-alpha                                            | 510  | LOC113645995         | actinopterygii | Tachysurus fulvidraco        | guanine nucleotide-binding protein G(o) subunit alpha-like isoform X1 [Tachysurus fulvidraco]                        | GCF_003724035.1 | TRADD-N      |
| XP_020902163.1 | Ankyrin+TRADDN-DEDD2                                       | 744  | LOC110240689         | cnidaria       | Exaiptasia pallida           | LOW QUALITY PROTEIN: uncharacterized protein LOC110240689 [Exaiptasia pallida]                                       | -               | TRADDN-DEDD2 |
| KXJ13244.1     | Ankyrin+TRADDN-DEDD2+Ankyrin                               | 1132 | AnkyrinRD50          | cnidaria       | Exaiptasia pallida           | Ankyrin repeat domain-containing protein 50 [Exaiptasia pallida]                                                     | GCA_001417965.1 | TRADDN-DEDD2 |
| PFX21248.1     | CAP_GLY+CAP_GLY+Pkinase+HEPN+TRADDN-DEDD2+Thioredoxin+PITH | 1887 | Txn1l                | cnidaria       | Stylophora pistillata        | Thioredoxin-like protein 1 [Stylophora pistillata]                                                                   | GCA_002571385.1 | TRADDN-DEDD2 |
| XP_020622138.1 | CARD+Death+TRADDN-DEDD2+CARD                               | 543  | LOC110059758         | cnidaria       | Orbicella faveolata          | uncharacterized protein LOC110059758 isoform X1 [Orbicella faveolata]                                                | GCF_002042975.1 | TRADDN-DEDD2 |

| acc            | architecture                                                                                     | len  | gen.name             | taxend   | species                | define                                                                                | gca             | clade        |
|----------------|--------------------------------------------------------------------------------------------------|------|----------------------|----------|------------------------|---------------------------------------------------------------------------------------|-----------------|--------------|
| XP_020630030.1 | CARD+TRADDN-DEDD2+CARD                                                                           | 424  | LOC110067080         | cnidaria | Orbicella faveolata    | uncharacterized protein                                                               | GCF_002042975.1 | TRADDN-DEDD2 |
| XP_020627278.1 | CARD+TRADDN-DEDD2+RNA-receptor_SF2-helicase+helical-insertion-in-helicase+RIG-I_C-RD             | 1143 | LOC110064561         | cnidaria | Orbicella faveolata    | LOC110067080 [Orbicella faveolata]<br>probable ATP-dependent RNA                      | GCF_002042975.1 | TRADDN-DEDD2 |
| KXJ16647.1     | CARD+TRADDN-DEDD2+RNA-receptor_SF2-helicase+RIG-I_C-RD                                           | 972  | IFIH1                | cnidaria | Exaiptasia pallida     | helicase DHX58 [Orbicella faveolata]<br>Interferon-induced helicase C                 | GCA_001417965.1 | TRADDN-DEDD2 |
| XP_020896387.1 | CARD+TRADDN-DEDD2+RNA-receptor_SF2-helicase+RIG-I_C-RD                                           | 985  | LOC110235281         | cnidaria | Exaiptasia pallida     | domain-containing protein 1<br>[Exaiptasia pallida]                                   | -               | TRADDN-DEDD2 |
| XP_022806512.1 | CARD+TRADDN-DEDD2+RNA-receptor_SF2-helicase+RIG-I_C-RD                                           | 1226 | LOC111343597         | cnidaria | Stylophora pistillata  | probable ATP-dependent RNA<br>helicase DHX58 [Exaiptasia pallida]                     | GCF_002571385.1 | TRADDN-DEDD2 |
| XP_022806513.1 | CARD+TRADDN-DEDD2+RNA-receptor_SF2-helicase+RIG-I_C-RD                                           | 1207 | LOC111343600         | cnidaria | Stylophora pistillata  | helicase DDX58 [Stylophora<br>pistillata]                                             | GCF_002571385.1 | TRADDN-DEDD2 |
| XP_022806514.1 | CARD+TRADDN-DEDD2+RNA-receptor_SF2-helicase+RIG-I_C-RD                                           | 1104 | LOC111343600         | cnidaria | Stylophora pistillata  | probable ATP-dependent RNA<br>helicase DHX58 isoform X1<br>[Stylophora pistillata]    | GCF_002571385.1 | TRADDN-DEDD2 |
| RMX49226.1     | CARD+TRADDN-DEDD2+RNA-receptor_SF2-helicase+RIG-I_C-RD+CARD+RNA-receptor_SF2-helicase+RIG-I_C-RD | 2192 | pdam_00005823        | cnidaria | Pocillopora damicornis | hypothetical protein<br>pdam_00005823 [Pocillopora<br>damicornis]                     | GCA_003704095.1 | TRADDN-DEDD2 |
| XP_001622723.1 | Coiled-coil+TRADDN-DEDD2+Coiled-coil                                                             | 1012 | NEMVEDRAFT_v1g248321 | cnidaria | Nematostella vectensis | predicted protein [Nematostella<br>vectensis]                                         | GCF_000209225.1 | TRADDN-DEDD2 |
| XP_001633002.1 | Coiled-coil+TRADDN-DEDD2+Coiled-coil                                                             | 1003 | NEMVEDRAFT_v1g243073 | cnidaria | Nematostella vectensis | predicted protein [Nematostella<br>vectensis]                                         | GCF_000209225.1 | TRADDN-DEDD2 |
| PFX11660.1     | Coiled-coil+TRADDN-DEDD2+TPRs+CASPASE                                                            | 1462 | TTC28                | cnidaria | Stylophora pistillata  | Tetratricopeptide repeat protein 28<br>[Stylophora pistillata]                        | GCA_002571385.1 | TRADDN-DEDD2 |
| XP_020601168.1 | Death+Death+TRADDN-DEDD2                                                                         | 403  | LOC110040292         | cnidaria | Orbicella faveolata    | uncharacterized protein                                                               | GCF_002042975.1 | TRADDN-DEDD2 |
| XP_020617425.1 | Death+TRADDN-DEDD2                                                                               | 587  | LOC110055381         | cnidaria | Orbicella faveolata    | LOC110040292 [Orbicella faveolata]<br>uncharacterized protein                         | GCF_002042975.1 | TRADDN-DEDD2 |
| XP_020617490.1 | Death+TRADDN-DEDD2+Coiled-coil+ArgoN+ArgoL1+PAZ+PIWI                                             | 1165 | LOC110055440         | cnidaria | Orbicella faveolata    | LOC110055381 isoform X1<br>[Orbicella faveolata]                                      | GCF_002042975.1 | TRADDN-DEDD2 |
| XP_020617491.1 | Death+TRADDN-DEDD2+Coiled-coil+ArgoN+ArgoL1+PAZ+PIWI                                             | 1107 | LOC110055440         | cnidaria | Orbicella faveolata    | protein argonaute-2-like isoform X1<br>[Orbicella faveolata]                          | GCF_002042975.1 | TRADDN-DEDD2 |
| PFX26681.1     | Death+TRADDN-DEDD2+RVT_1                                                                         | 448  | RTase                | cnidaria | Stylophora pistillata  | protein argonaute-2-like isoform X2<br>[Orbicella faveolata]                          | GCF_002042975.1 | TRADDN-DEDD2 |
| PFX17719.1     | Death+TRADDN-DEDD2+SF2-helicase                                                                  | 2256 | DDX60                | cnidaria | Stylophora pistillata  | putative RNA-directed DNA<br>polymerase from transposon BS<br>[Stylophora pistillata] | GCA_002571385.1 | TRADDN-DEDD2 |
| XP_022803051.1 | Death+TRADDN-DEDD2+SF2-helicase                                                                  | 2273 | LOC111340467         | cnidaria | Stylophora pistillata  | putative ATP-dependent RNA<br>helicase DDX60 [Stylophora<br>pistillata]               | GCF_002571385.1 | TRADDN-DEDD2 |
| XP_020619853.1 | Death+TRADDN-DEDD2+TPRs                                                                          | 690  | LOC110057601         | cnidaria | Orbicella faveolata    | probable ATP-dependent RNA<br>helicase DDX60-like [Stylophora<br>pistillata]          | GCF_002042975.1 | TRADDN-DEDD2 |
| XP_020619854.1 | Death+TRADDN-DEDD2+TPRs                                                                          | 659  | LOC110057601         | cnidaria | Orbicella faveolata    | kinesin light chain-like isoform X1<br>[Orbicella faveolata]                          | GCF_002042975.1 | TRADDN-DEDD2 |
| XP_022778232.1 | DED+DED+Coiled-coil+TRADDN-DEDD2+Coiled-coil+domain1                                             | 702  | LOC111319752         | cnidaria | Stylophora pistillata  | kinesin light chain 3-like isoform X2<br>[Orbicella faveolata]                        | GCF_002571385.1 | TRADDN-DEDD2 |
|                |                                                                                                  |      |                      |          |                        | uncharacterized protein<br>LOC111319752 isoform X2<br>[Stylophora pistillata]         |                 |              |

| acc            | architecture                                                          | len  | gen.name            | taxend   | species                | define                                                                              | gca             | clade        |
|----------------|-----------------------------------------------------------------------|------|---------------------|----------|------------------------|-------------------------------------------------------------------------------------|-----------------|--------------|
| XP_022804881.1 | DED+DED+Coiled-coil+TRADDN-DEDD2+Coiled-coil+domain1                  | 766  | LOC111342099        | cnidaria | Stylophora pistillata  | uncharacterized protein LOC111342099 isoform X2 [Stylophora pistillata]             | GCF_002571385.1 | TRADDN-DEDD2 |
| PFX21941.1     | DED+DED+RVT_1+Coiled-coil+GIY-YIG+TRADDN-DEDD2+Death                  | 1081 | AWC38_SpisGene13552 | cnidaria | Stylophora pistillata  | hypothetical protein AWC38_SpisGene13552 [Stylophora pistillata]                    | GCA_002571385.1 | TRADDN-DEDD2 |
| XP_015775969.1 | DED+DED+TRADDN-DEDD2                                                  | 335  | LOC107354067        | cnidaria | Acropora digitifera    | PREDICTED: uncharacterized protein LOC107354067 [Acropora digitifera]               | GCF_000222465.1 | TRADDN-DEDD2 |
| RMX41115.1     | DED+DED+TRADDN-DEDD2                                                  | 326  | pdam_00003220       | cnidaria | Pocillopora damicornis | hypothetical protein pdam_00003220, partial [Pocillopora damicornis]                | GCA_003704095.1 | TRADDN-DEDD2 |
| PFX12077.1     | DED+DED+TRADDN-DEDD2                                                  | 287  | AWC38_SpisGene24020 | cnidaria | Stylophora pistillata  | hypothetical protein AWC38_SpisGene24020 [Stylophora pistillata]                    | GCA_002571385.1 | TRADDN-DEDD2 |
| PFX13328.1     | DED+DED+TRADDN-DEDD2+Ankyrin+RVT_1+helical-region                     | 1263 | AWC38_SpisGene22591 | cnidaria | Stylophora pistillata  | putative ankyrin repeat protein [Stylophora pistillata]                             | GCA_002571385.1 | TRADDN-DEDD2 |
| XP_015778391.1 | DED+DED+TRADDN-DEDD2+Coiled-coil-Znf                                  | 481  | LOC107356270        | cnidaria | Acropora digitifera    | PREDICTED: uncharacterized protein LOC107356270 [Acropora digitifera]               | GCF_000222465.1 | TRADDN-DEDD2 |
| XP_020617411.1 | DED+DED+TRADDN-DEDD2+Coiled-coil+ArgoN+ArgoL1+PAZ+PIWI                | 1412 | LOC110055369        | cnidaria | Orbicella faveolata    | protein argonaute-2-like [Orbicella faveolata]                                      | GCF_002042975.1 | TRADDN-DEDD2 |
| XP_022777458.1 | DED+DED+TRADDN-DEDD2+Coiled-coil+Death+Coiled-coil+domain1            | 798  | LOC111318857        | cnidaria | Stylophora pistillata  | uncharacterized protein LOC111318857 [Stylophora pistillata]                        | GCF_002571385.1 | TRADDN-DEDD2 |
| XP_022778231.1 | DED+DED+TRADDN-DEDD2+Coiled-coil+Death+Coiled-coil+domain1            | 798  | LOC111319752        | cnidaria | Stylophora pistillata  | uncharacterized protein LOC111319752 isoform X1 [Stylophora pistillata]             | GCF_002571385.1 | TRADDN-DEDD2 |
| XP_022789506.1 | DED+DED+TRADDN-DEDD2+Coiled-coil+Death+Coiled-coil+domain1            | 840  | LOC111329163        | cnidaria | Stylophora pistillata  | uncharacterized protein LOC111329163 [Stylophora pistillata]                        | GCF_002571385.1 | TRADDN-DEDD2 |
| XP_022804880.1 | DED+DED+TRADDN-DEDD2+Coiled-coil+Death+Coiled-coil+domain1            | 862  | LOC111342099        | cnidaria | Stylophora pistillata  | uncharacterized protein LOC111342099 isoform X1 [Stylophora pistillata]             | GCF_002571385.1 | TRADDN-DEDD2 |
| PFX21953.1     | DED+DED+TRADDN-DEDD2+Coiled-coil+DED+DED+TRADDN-DEDD2+Retrotran_gag_2 | 1135 | AWC38_SpisGene13547 | cnidaria | Stylophora pistillata  | Retrovirus-related Pol polyprotein from transposon TNT 1-94 [Stylophora pistillata] | GCA_002571385.1 | TRADDN-DEDD2 |
| XP_022798487.1 | DED+DED+TRADDN-DEDD2+Coiled-coil+Filamin+Beta-propeller               | 902  | LOC111336627        | cnidaria | Stylophora pistillata  | uncharacterized protein LOC111336627 [Stylophora pistillata]                        | GCF_002571385.1 | TRADDN-DEDD2 |
| XP_015752590.1 | DED+DED+TRADDN-DEDD2+Death+Coiled-coil+domain1                        | 797  | LOC107332373        | cnidaria | Acropora digitifera    | PREDICTED: uncharacterized protein LOC107332373 isoform X1 [Acropora digitifera]    | GCF_000222465.1 | TRADDN-DEDD2 |
| XP_015752591.1 | DED+DED+TRADDN-DEDD2+Death+Coiled-coil+domain1                        | 794  | LOC107332373        | cnidaria | Acropora digitifera    | PREDICTED: uncharacterized protein LOC107332373 isoform X2 [Acropora digitifera]    | GCF_000222465.1 | TRADDN-DEDD2 |
| XP_015752592.1 | DED+DED+TRADDN-DEDD2+Death+Coiled-coil+domain1                        | 766  | LOC107332373        | cnidaria | Acropora digitifera    | PREDICTED: uncharacterized protein LOC107332373 isoform X3 [Acropora digitifera]    | GCF_000222465.1 | TRADDN-DEDD2 |
| XP_015752593.1 | DED+DED+TRADDN-DEDD2+Death+Coiled-coil+domain1                        | 783  | LOC107332375        | cnidaria | Acropora digitifera    | PREDICTED: uncharacterized protein LOC107332375 [Acropora digitifera]               | GCF_000222465.1 | TRADDN-DEDD2 |

| acc            | architecture                                         | len  | gen.name             | taxend   | species                | define                                                                                             | gca             | clade        |
|----------------|------------------------------------------------------|------|----------------------|----------|------------------------|----------------------------------------------------------------------------------------------------|-----------------|--------------|
| XP_015752594.1 | DED+DED+TRADDN-DEDD2+Death+Coiled-coil+domain1       | 780  | LOC107332376         | cnidaria | Acropora digitifera    | PREDICTED: uncharacterized protein LOC107332376 [Acropora digitifera]                              | GCF_000222465.1 | TRADDN-DEDD2 |
| XP_015752596.1 | DED+DED+TRADDN-DEDD2+Death+Coiled-coil+domain1       | 776  | LOC107332377         | cnidaria | Acropora digitifera    | PREDICTED: uncharacterized protein LOC107332377 [Acropora digitifera]                              | GCF_000222465.1 | TRADDN-DEDD2 |
| PFX14010.1     | DED+DED+TRADDN-DEDD2+Death+Coiled-coil+domain1       | 867  | AWC38_SpisGene21867  | cnidaria | Stylophora pistillata  | hypothetical protein AWC38_SpisGene21867 [Stylophora pistillata]                                   | GCA_002571385.1 | TRADDN-DEDD2 |
| XP_022789524.1 | DED+DED+TRADDN-DEDD2+Death+Coiled-coil+domain1       | 820  | LOC111329179         | cnidaria | Stylophora pistillata  | uncharacterized protein LOC111329179 [Stylophora pistillata]                                       | GCF_002571385.1 | TRADDN-DEDD2 |
| XP_022808330.1 | DED+DED+TRADDN-DEDD2+Death+Coiled-coil+domain1       | 829  | LOC111345314         | cnidaria | Stylophora pistillata  | uncharacterized protein LOC111345314 [Stylophora pistillata]                                       | GCF_002571385.1 | TRADDN-DEDD2 |
| XP_022796399.1 | DED+DED+TRADDN-DEDD2+helical-region+Death            | 648  | LOC111334847         | cnidaria | Stylophora pistillata  | uncharacterized protein LOC111334847 isoform X1 [Stylophora pistillata]                            | GCF_002571385.1 | TRADDN-DEDD2 |
| XP_022796400.1 | DED+DED+TRADDN-DEDD2+helical-region+Death            | 568  | LOC111334847         | cnidaria | Stylophora pistillata  | uncharacterized protein LOC111334847 isoform X2 [Stylophora pistillata]                            | GCF_002571385.1 | TRADDN-DEDD2 |
| XP_022796409.1 | DED+DED+TRADDN-DEDD2+helical-region+Death            | 630  | LOC111334858         | cnidaria | Stylophora pistillata  | uncharacterized protein LOC111334858 [Stylophora pistillata]                                       | GCF_002571385.1 | TRADDN-DEDD2 |
| XP_015771254.1 | DED+DED+TRADDN-DEDD2+TPRs                            | 677  | LOC107349586         | cnidaria | Acropora digitifera    | PREDICTED: tetratricopeptide repeat protein 28-like isoform X1 [Acropora digitifera]               | GCF_000222465.1 | TRADDN-DEDD2 |
| XP_015771255.1 | DED+DED+TRADDN-DEDD2+TPRs                            | 637  | LOC107349586         | cnidaria | Acropora digitifera    | PREDICTED: uncharacterized protein LOC107349586 isoform X2 [Acropora digitifera]                   | GCF_000222465.1 | TRADDN-DEDD2 |
| KXJ08000.1     | DED+TRADDN-DEDD2                                     | 1584 | AC249_AIPGENE7955    | cnidaria | Exaiptasia pallida     | hypothetical protein AC249_AIPGENE7955 [Exaiptasia pallida]                                        | GCA_001417965.1 | TRADDN-DEDD2 |
| XP_001623934.1 | DED+TRADDN-DEDD2                                     | 524  | NEMVEDRAFT_v1g218706 | cnidaria | Nematostella vectensis | predicted protein [Nematostella vectensis]                                                         | GCF_000209225.1 | TRADDN-DEDD2 |
| RMX42794.1     | DED+TRADDN-DEDD2                                     | 361  | pdam_00021837        | cnidaria | Pocillopora damicornis | hypothetical protein pdam_00021837 [Pocillopora damicornis]                                        | GCA_003704095.1 | TRADDN-DEDD2 |
| XP_022804883.1 | DED+TRADDN-DEDD2                                     | 324  | LOC111342102         | cnidaria | Stylophora pistillata  | uncharacterized protein LOC111342102 [Stylophora pistillata]                                       | GCF_002571385.1 | TRADDN-DEDD2 |
| PFX13329.1     | DED+TRADDN-DEDD2+Ankyrin                             | 2392 | Ankyrinrd28          | cnidaria | Stylophora pistillata  | Serine/threonine-protein phosphatase 6 regulatory ankyrin repeat subunit A [Stylophora pistillata] | GCA_002571385.1 | TRADDN-DEDD2 |
| XP_022809215.1 | DED+TRADDN-DEDD2+Ankyrin                             | 692  | LOC111346175         | cnidaria | Stylophora pistillata  | uncharacterized protein LOC111346175, partial [Stylophora pistillata]                              | GCF_002571385.1 | TRADDN-DEDD2 |
| PFX33087.1     | DED+TRADDN-DEDD2+Ankyrin+RVT_1+helical-region+RNaseH | 1295 | ankrd52              | cnidaria | Stylophora pistillata  | Serine/threonine-protein phosphatase 6 regulatory ankyrin repeat subunit C [Stylophora pistillata] | GCA_002571385.1 | TRADDN-DEDD2 |

| acc            | architecture                                           | len  | gen.name            | taxend   | species                | define                                                                | gca             | clade        |
|----------------|--------------------------------------------------------|------|---------------------|----------|------------------------|-----------------------------------------------------------------------|-----------------|--------------|
| KXJ07119.1     | DED+TRADDN-DEDD2+Coiled-coil                           | 1074 | AC249_AIPGENE15612  | cnidaria | Exaiptasia pallida     | hypothetical protein AC249_AIPGENE15612 [Exaiptasia pallida]          | GCA_001417965.1 | TRADDN-DEDD2 |
| KXJ08006.1     | DED+TRADDN-DEDD2+Coiled-coil                           | 675  | AC249_AIPGENE7952   | cnidaria | Exaiptasia pallida     | hypothetical protein AC249_AIPGENE7952, partial [Exaiptasia pallida]  | GCA_001417965.1 | TRADDN-DEDD2 |
| XP_020895892.1 | DED+TRADDN-DEDD2+Coiled-coil                           | 677  | LOC110234834        | cnidaria | Exaiptasia pallida     | uncharacterized protein LOC110234834, partial [Exaiptasia pallida]    | GCF_001417965.1 | TRADDN-DEDD2 |
| XP_020895893.1 | DED+TRADDN-DEDD2+Coiled-coil                           | 951  | LOC110234835        | cnidaria | Exaiptasia pallida     | uncharacterized protein LOC110234835 [Exaiptasia pallida]             | GCF_001417965.1 | TRADDN-DEDD2 |
| XP_022805074.1 | DED+TRADDN-DEDD2+Coiled-coil+Ankyrin                   | 927  | LOC111342273        | cnidaria | Stylophora pistillata  | ankyrin-3-like [Stylophora pistillata]                                | GCF_002571385.1 | TRADDN-DEDD2 |
| PFX16507.1     | DED+TRADDN-DEDD2+Coiled-coil+Death+Coiled-coil+domain1 | 1249 | AWC38_SpisGene19211 | cnidaria | Stylophora pistillata  | hypothetical protein AWC38_SpisGene19211 [Stylophora pistillata]      | GCA_002571385.1 | TRADDN-DEDD2 |
| XP_020616560.1 | DED+TRADDN-DEDD2+Coiled-coil+Death+domain1             | 742  | LOC110054557        | cnidaria | Orbicella faveolata    | uncharacterized protein LOC110054557 isoform X1 [Orbicella faveolata] | GCF_002042975.1 | TRADDN-DEDD2 |
| XP_020616561.1 | DED+TRADDN-DEDD2+Coiled-coil+Death+domain1             | 720  | LOC110054557        | cnidaria | Orbicella faveolata    | uncharacterized protein LOC110054557 isoform X2 [Orbicella faveolata] | GCF_002042975.1 | TRADDN-DEDD2 |
| XP_020616562.1 | DED+TRADDN-DEDD2+Coiled-coil+Death+domain1             | 654  | LOC110054557        | cnidaria | Orbicella faveolata    | uncharacterized protein LOC110054557 isoform X3 [Orbicella faveolata] | GCF_002042975.1 | TRADDN-DEDD2 |
| XP_020616563.1 | DED+TRADDN-DEDD2+Coiled-coil+Death+domain1             | 741  | LOC110054558        | cnidaria | Orbicella faveolata    | uncharacterized protein LOC110054558 [Orbicella faveolata]            | GCF_002042975.1 | TRADDN-DEDD2 |
| XP_022808331.1 | DED+TRADDN-DEDD2+Coiled-coil+Death+domain1             | 720  | LOC111345316        | cnidaria | Stylophora pistillata  | uncharacterized protein LOC111345316 [Stylophora pistillata]          | GCF_002571385.1 | TRADDN-DEDD2 |
| XP_020892738.1 | DED+TRADDN-DEDD2+Death+Death                           | 586  | LOC110231998        | cnidaria | Exaiptasia pallida     | uncharacterized protein LOC110231998 [Exaiptasia pallida]             | GCF_001417965.1 | TRADDN-DEDD2 |
| RMX47092.1     | DED+TRADDN-DEDD2+DED+TRADDN-DEDD2+Ankyrin              | 583  | pdam_00023287       | cnidaria | Pocillopora damicornis | hypothetical protein pdam_00023287, partial [Pocillopora damicornis]  | GCA_003704095.1 | TRADDN-DEDD2 |
| XP_020604804.1 | DED+TRADDN-DEDD2+EF-hand+SH2                           | 587  | LOC110043668        | cnidaria | Orbicella faveolata    | uncharacterized protein LOC110043668 isoform X1 [Orbicella faveolata] | GCF_002042975.1 | TRADDN-DEDD2 |
| XP_020604805.1 | DED+TRADDN-DEDD2+EF-hand+SH2                           | 586  | LOC110043668        | cnidaria | Orbicella faveolata    | uncharacterized protein LOC110043668 isoform X2 [Orbicella faveolata] | GCF_002042975.1 | TRADDN-DEDD2 |
| RMX43465.1     | DED+TRADDN-DEDD2+EF-hand+SH2                           | 570  | pdam_00001887       | cnidaria | Pocillopora damicornis | hypothetical protein pdam_00001887, partial [Pocillopora damicornis]  | GCA_003704095.1 | TRADDN-DEDD2 |
| XP_020613044.1 | DED+TRADDN-DEDD2+HEPN+APATPase                         | 971  | LOC110051349        | cnidaria | Orbicella faveolata    | uncharacterized protein LOC110051349 isoform X1 [Orbicella faveolata] | GCF_002042975.1 | TRADDN-DEDD2 |
| XP_020613045.1 | DED+TRADDN-DEDD2+HEPN+APATPase                         | 880  | LOC110051349        | cnidaria | Orbicella faveolata    | uncharacterized protein LOC110051349 isoform X2 [Orbicella faveolata] | GCF_002042975.1 | TRADDN-DEDD2 |
| XP_020613046.1 | DED+TRADDN-DEDD2+HEPN+APATPase                         | 816  | LOC110051349        | cnidaria | Orbicella faveolata    | uncharacterized protein LOC110051349 isoform X3 [Orbicella faveolata] | GCF_002042975.1 | TRADDN-DEDD2 |

| acc            | architecture                                                                                                                                                      | len  | gen.name             | taxend   | species                | define                                                                    | gca             | clade        |
|----------------|-------------------------------------------------------------------------------------------------------------------------------------------------------------------|------|----------------------|----------|------------------------|---------------------------------------------------------------------------|-----------------|--------------|
| XP_015750526.1 | DED+TRADDN-DEDD2+TPRs                                                                                                                                             | 566  | LOC107330421         | cnidaria | Acropora digitifera    | PREDICTED: tetratricopeptide repeat protein 28-like [Acropora digitifera] | GCF_000222465.1 | TRADDN-DEDD2 |
| XP_020892739.1 | DED+TRADDN-DEDD2+TPRs                                                                                                                                             | 495  | LOC110231999         | cnidaria | Exaiptasia pallida     | uncharacterized protein LOC110231999 isoform X1 [Exaiptasia pallida]      | GCF_001417965.1 | TRADDN-DEDD2 |
| XP_020892740.1 | DED+TRADDN-DEDD2+TPRs                                                                                                                                             | 494  | LOC110231999         | cnidaria | Exaiptasia pallida     | uncharacterized protein LOC110231999 isoform X2 [Exaiptasia pallida]      | -               | TRADDN-DEDD2 |
| KXJ18617.1     | DED+TRADDN-DEDD2+TPRs+DED+TRADDN-DEDD2+TPRs                                                                                                                       | 1303 | TTC28                | cnidaria | Exaiptasia pallida     | Tetratricopeptide repeat protein 28 [Exaiptasia pallida]                  | GCA_001417965.1 | TRADDN-DEDD2 |
| XP_015766339.1 | DED+TRADDN-NCOA6                                                                                                                                                  | 203  | LOC107345145         | cnidaria | Acropora digitifera    | PREDICTED: uncharacterized protein LOC107345145 [Acropora digitifera]     | GCF_000222465.1 | TRADDN-NCOA6 |
| KXJ06545.1     | DED+TRADDN-NCOA6                                                                                                                                                  | 145  | AC249_AIPGENE1391    | cnidaria | Exaiptasia pallida     | hypothetical protein AC249_AIPGENE1391, partial [Exaiptasia pallida]      | GCA_001417965.1 | TRADDN-NCOA6 |
| KXJ09358.1     | DED+TRADDN-NCOA6                                                                                                                                                  | 279  | AC249_AIPGENE18212   | cnidaria | Exaiptasia pallida     | hypothetical protein AC249_AIPGENE18212 [Exaiptasia pallida]              | GCA_001417965.1 | TRADDN-NCOA6 |
| XP_020632770.1 | DED+TRADDN-NCOA6+Ankyrin                                                                                                                                          | 1159 | LOC110069584         | cnidaria | Orbicella faveolata    | protein fem-1 homolog C-like [Orbicella faveolata]                        | GCF_002042975.1 | TRADDN-NCOA6 |
| XP_022791057.1 | DED+TRADDN-NCOA6+Ankyrin                                                                                                                                          | 1115 | LOC111330464         | cnidaria | Stylophora pistillata  | protein fem-1 homolog C-like [Stylophora pistillata]                      | GCF_002571385.1 | TRADDN-NCOA6 |
| XP_022785642.1 | DED+TRADDN-NCOA6+vWA                                                                                                                                              | 448  | LOC111325991         | cnidaria | Stylophora pistillata  | uncharacterized protein LOC111325991 [Stylophora pistillata]              | GCF_002571385.1 | TRADDN-NCOA6 |
| XP_020909160.1 | DED+TRADDN-NCOA6+vWA+C-ter                                                                                                                                        | 659  | LOC110247112         | cnidaria | Exaiptasia pallida     | uncharacterized protein LOC110247112 [Exaiptasia pallida]                 | GCF_001417965.1 | TRADDN-NCOA6 |
| XP_020914592.1 | DED+TRADDN-NCOA6+vWA+C-ter                                                                                                                                        | 600  | LOC110252162         | cnidaria | Exaiptasia pallida     | uncharacterized protein LOC110252162 isoform X1 [Exaiptasia pallida]      | GCF_001417965.1 | TRADDN-NCOA6 |
| XP_020914601.1 | DED+TRADDN-NCOA6+vWA+C-ter                                                                                                                                        | 478  | LOC110252162         | cnidaria | Exaiptasia pallida     | uncharacterized protein LOC110252162 isoform X2 [Exaiptasia pallida]      | GCF_001417965.1 | TRADDN-NCOA6 |
| XP_001635271.1 | DED+TRADDN-NCOA6+vWA+C-ter                                                                                                                                        | 619  | NEMVEDRAFT_v1g241726 | cnidaria | Nematostella vectensis | predicted protein [Nematostella vectensis]                                | GCF_000209225.1 | TRADDN-NCOA6 |
| XP_020605636.1 | DED+TRADDN-NCOA6+vWA+C-ter                                                                                                                                        | 599  | LOC110044428         | cnidaria | Orbicella faveolata    | uncharacterized protein LOC110044428 [Orbicella faveolata]                | GCF_002042975.1 | TRADDN-NCOA6 |
| XP_022799237.1 | DED+TRADDN-NCOA6+vWA+C-ter                                                                                                                                        | 603  | LOC111337234         | cnidaria | Stylophora pistillata  | uncharacterized protein LOC111337234 [Stylophora pistillata]              | GCF_002571385.1 | TRADDN-NCOA6 |
| XP_022810130.1 | FN3+TRADDN-DEDD2+HEPN                                                                                                                                             | 528  | LOC111347144         | cnidaria | Stylophora pistillata  | uncharacterized protein LOC111347144, partial [Stylophora pistillata]     | GCF_002571385.1 | TRADDN-DEDD2 |
| PFX12555.1     | FN3+TRADDN-DEDD2+HEPN+PNPase+DUF1759+Gag-knuckle+Gag-knuckle+RVT_1+Peptidase_A17+retroviral_integrase_ZF+rve+RVT_1+Peptidase_A17+retroviral_integrase_ZF+rve+LRRs | 3885 | SHOC2                | cnidaria | Stylophora pistillata  | Leucine-rich repeat protein SHOC-2 [Stylophora pistillata]                | GCA_002571385.1 | TRADDN-DEDD2 |
| PFX14009.1     | GT4-GTase+Coiled-coil+TRADDN-DEDD2+LRRs                                                                                                                           | 1463 | NLRP3                | cnidaria | Stylophora pistillata  | NACHT, LRR and PYD domains-containing protein 3 [Stylophora pistillata]   | GCA_002571385.1 | TRADDN-DEDD2 |

| acc            | architecture                                                                      | len  | gen.name     | taxend   | species               | define                                                                           | gca             | clade        |
|----------------|-----------------------------------------------------------------------------------|------|--------------|----------|-----------------------|----------------------------------------------------------------------------------|-----------------|--------------|
| PFX12985.1     | GT4-GTase+GT4-GTase+TRADDN-DEDD2                                                  | 1190 | mshA         | cnidaria | Stylophora pistillata | D-inositol 3-phosphate glycosyltransferase [Stylophora pistillata]               | GCA_002571385.1 | TRADDN-DEDD2 |
| XP_015754268.1 | GT4-GTase+GT4-GTase+TRADDN-DEDD2+GT4-GTase+RVT_1+Ig                               | 2108 | LOC107333918 | cnidaria | Acropora digitifera   | PREDICTED: uncharacterized protein LOC107333918 [Acropora digitifera]            | GCF_000222465.1 | TRADDN-DEDD2 |
| PFX15535.1     | GT4-GTase+GT4-GTase+TRADDN-DEDD2+GT4-GTase+TRADDN-DEDD2+TRADDN-DEDD2+TRADDN-DEDD2 | 2524 | mshA         | cnidaria | Stylophora pistillata | D-inositol 3-phosphate glycosyltransferase, partial [Stylophora pistillata]      | GCA_002571385.1 | TRADDN-DEDD2 |
| XP_015749857.1 | GT4-GTase+PNPase+TRADDN-DEDD2                                                     | 1031 | LOC107329706 | cnidaria | Acropora digitifera   | PREDICTED: uncharacterized protein LOC107329706 isoform X1 [Acropora digitifera] | GCF_000222465.1 | TRADDN-DEDD2 |
| XP_015749858.1 | GT4-GTase+PNPase+TRADDN-DEDD2                                                     | 982  | LOC107329706 | cnidaria | Acropora digitifera   | PREDICTED: uncharacterized protein LOC107329706 isoform X2 [Acropora digitifera] | GCF_000222465.1 | TRADDN-DEDD2 |
| XP_015749859.1 | GT4-GTase+PNPase+TRADDN-DEDD2                                                     | 961  | LOC107329706 | cnidaria | Acropora digitifera   | PREDICTED: uncharacterized protein LOC107329706 isoform X3 [Acropora digitifera] | GCF_000222465.1 | TRADDN-DEDD2 |
| XP_015749860.1 | GT4-GTase+PNPase+TRADDN-DEDD2                                                     | 933  | LOC107329706 | cnidaria | Acropora digitifera   | PREDICTED: uncharacterized protein LOC107329706 isoform X4 [Acropora digitifera] | GCF_000222465.1 | TRADDN-DEDD2 |
| PFX15539.1     | GT4-GTase+TM+TRADDN-DEDD2+TRADDN-DEDD2+LRRs                                       | 1171 | NLRP9        | cnidaria | Stylophora pistillata | NACHT, LRR and PYD domains-containing protein 9 [Stylophora pistillata]          | GCA_002571385.1 | TRADDN-DEDD2 |
| XP_015748178.1 | GT4-GTase+TRADDN-DEDD2                                                            | 374  | LOC107327971 | cnidaria | Acropora digitifera   | PREDICTED: uncharacterized protein LOC107327971 [Acropora digitifera]            | GCF_000222465.1 | TRADDN-DEDD2 |
| XP_015750005.1 | GT4-GTase+TRADDN-DEDD2                                                            | 637  | LOC107329865 | cnidaria | Acropora digitifera   | PREDICTED: uncharacterized protein LOC107329865 [Acropora digitifera]            | GCF_000222465.1 | TRADDN-DEDD2 |
| XP_015750171.1 | GT4-GTase+TRADDN-DEDD2                                                            | 397  | LOC107330034 | cnidaria | Acropora digitifera   | PREDICTED: uncharacterized protein LOC107330034 [Acropora digitifera]            | GCF_000222465.1 | TRADDN-DEDD2 |
| XP_015754272.1 | GT4-GTase+TRADDN-DEDD2                                                            | 660  | LOC107333922 | cnidaria | Acropora digitifera   | PREDICTED: uncharacterized protein LOC107333922 [Acropora digitifera]            | GCF_000222465.1 | TRADDN-DEDD2 |
| XP_015761974.1 | GT4-GTase+TRADDN-DEDD2                                                            | 503  | LOC107341068 | cnidaria | Acropora digitifera   | PREDICTED: uncharacterized protein LOC107341068 [Acropora digitifera]            | GCF_000222465.1 | TRADDN-DEDD2 |
| XP_015765567.1 | GT4-GTase+TRADDN-DEDD2                                                            | 1016 | LOC107344434 | cnidaria | Acropora digitifera   | PREDICTED: uncharacterized protein LOC107344434 [Acropora digitifera]            | GCF_000222465.1 | TRADDN-DEDD2 |
| XP_015768793.1 | GT4-GTase+TRADDN-DEDD2                                                            | 589  | LOC107347415 | cnidaria | Acropora digitifera   | PREDICTED: uncharacterized protein LOC107347415 [Acropora digitifera]            | GCF_000222465.1 | TRADDN-DEDD2 |
| XP_015768812.1 | GT4-GTase+TRADDN-DEDD2                                                            | 503  | LOC107347417 | cnidaria | Acropora digitifera   | PREDICTED: uncharacterized protein LOC107347417 [Acropora digitifera]            | GCF_000222465.1 | TRADDN-DEDD2 |
| XP_015774883.1 | GT4-GTase+TRADDN-DEDD2                                                            | 620  | LOC107353084 | cnidaria | Acropora digitifera   | PREDICTED: uncharacterized protein LOC107353084 isoform X1 [Acropora digitifera] | GCF_000222465.1 | TRADDN-DEDD2 |



| acc            | architecture           | len | gen.name     | taxend   | species             | define                                                                                      | gca             | clade        |
|----------------|------------------------|-----|--------------|----------|---------------------|---------------------------------------------------------------------------------------------|-----------------|--------------|
| XP_015774884.1 | GT4-GTase+TRADDN-DEDD2 | 606 | LOC107353084 | cnidaria | Acropora digitifera | PREDICTED: uncharacterized protein LOC107353084 isoform X2 [Acropora digitifera]            | GCF_000222465.1 | TRADDN-DEDD2 |
| XP_015774885.1 | GT4-GTase+TRADDN-DEDD2 | 570 | LOC107353084 | cnidaria | Acropora digitifera | PREDICTED: D-inositol 3-phosphate glycosyltransferase-like isoform X3 [Acropora digitifera] | GCF_000222465.1 | TRADDN-DEDD2 |
| XP_015775499.1 | GT4-GTase+TRADDN-DEDD2 | 662 | LOC107353672 | cnidaria | Acropora digitifera | PREDICTED: uncharacterized protein LOC107353672 [Acropora digitifera]                       | GCF_000222465.1 | TRADDN-DEDD2 |
| XP_015777355.1 | GT4-GTase+TRADDN-DEDD2 | 700 | LOC107355327 | cnidaria | Acropora digitifera | PREDICTED: uncharacterized protein LOC107355327 [Acropora digitifera]                       | GCF_000222465.1 | TRADDN-DEDD2 |
| XP_015778002.1 | GT4-GTase+TRADDN-DEDD2 | 437 | LOC107355902 | cnidaria | Acropora digitifera | PREDICTED: uncharacterized protein LOC107355902 [Acropora digitifera]                       | GCF_000222465.1 | TRADDN-DEDD2 |
| XP_015780640.1 | GT4-GTase+TRADDN-DEDD2 | 651 | LOC107358547 | cnidaria | Acropora digitifera | PREDICTED: D-inositol 3-phosphate glycosyltransferase-like [Acropora digitifera]            | GCF_000222465.1 | TRADDN-DEDD2 |
| XP_020611284.1 | GT4-GTase+TRADDN-DEDD2 | 404 | LOC110049798 | cnidaria | Orbicella faveolata | uncharacterized protein LOC110049798 [Orbicella faveolata]                                  | GCF_002042975.1 | TRADDN-DEDD2 |
| XP_020611387.1 | GT4-GTase+TRADDN-DEDD2 | 879 | LOC110049886 | cnidaria | Orbicella faveolata | uncharacterized protein LOC110049886 isoform X1 [Orbicella faveolata]                       | GCF_002042975.1 | TRADDN-DEDD2 |
| XP_020611388.1 | GT4-GTase+TRADDN-DEDD2 | 745 | LOC110049886 | cnidaria | Orbicella faveolata | uncharacterized protein LOC110049886 isoform X2 [Orbicella faveolata]                       | GCF_002042975.1 | TRADDN-DEDD2 |
| XP_020617511.1 | GT4-GTase+TRADDN-DEDD2 | 421 | LOC110055458 | cnidaria | Orbicella faveolata | uncharacterized protein LOC110055458 [Orbicella faveolata]                                  | GCF_002042975.1 | TRADDN-DEDD2 |
| XP_020617752.1 | GT4-GTase+TRADDN-DEDD2 | 647 | LOC110055699 | cnidaria | Orbicella faveolata | uncharacterized protein LOC110055699 isoform X1 [Orbicella faveolata]                       | GCF_002042975.1 | TRADDN-DEDD2 |
| XP_020617753.1 | GT4-GTase+TRADDN-DEDD2 | 645 | LOC110055699 | cnidaria | Orbicella faveolata | uncharacterized protein LOC110055699 isoform X2 [Orbicella faveolata]                       | GCF_002042975.1 | TRADDN-DEDD2 |
| XP_020622245.1 | GT4-GTase+TRADDN-DEDD2 | 587 | LOC110059861 | cnidaria | Orbicella faveolata | uncharacterized protein LOC110059861 [Orbicella faveolata]                                  | GCF_002042975.1 | TRADDN-DEDD2 |
| XP_020622252.1 | GT4-GTase+TRADDN-DEDD2 | 598 | LOC110059874 | cnidaria | Orbicella faveolata | uncharacterized protein LOC110059874 [Orbicella faveolata]                                  | GCF_002042975.1 | TRADDN-DEDD2 |
| XP_020622253.1 | GT4-GTase+TRADDN-DEDD2 | 648 | LOC110059875 | cnidaria | Orbicella faveolata | uncharacterized protein LOC110059875 [Orbicella faveolata]                                  | GCF_002042975.1 | TRADDN-DEDD2 |
| XP_020622254.1 | GT4-GTase+TRADDN-DEDD2 | 340 | LOC110059876 | cnidaria | Orbicella faveolata | uncharacterized protein LOC110059876 [Orbicella faveolata]                                  | GCF_002042975.1 | TRADDN-DEDD2 |
| XP_020632526.1 | GT4-GTase+TRADDN-DEDD2 | 300 | LOC110069356 | cnidaria | Orbicella faveolata | uncharacterized protein LOC110069356 isoform X1 [Orbicella faveolata]                       | GCF_002042975.1 | TRADDN-DEDD2 |
| XP_020632527.1 | GT4-GTase+TRADDN-DEDD2 | 299 | LOC110069356 | cnidaria | Orbicella faveolata | uncharacterized protein LOC110069356 isoform X2 [Orbicella faveolata]                       | GCF_002042975.1 | TRADDN-DEDD2 |
| XP_020632528.1 | GT4-GTase+TRADDN-DEDD2 | 276 | LOC110069356 | cnidaria | Orbicella faveolata | uncharacterized protein LOC110069356 isoform X3 [Orbicella faveolata]                       | GCF_002042975.1 | TRADDN-DEDD2 |

| acc            | architecture           | len | gen.name           | taxend   | species                | define                                                                            | gca             | clade        |
|----------------|------------------------|-----|--------------------|----------|------------------------|-----------------------------------------------------------------------------------|-----------------|--------------|
| RMX54007.1     | GT4-GTase+TRADDN-DEDD2 | 683 | pdam_00022334      | cnidaria | Pocillopora damicornis | hypothetical protein pdam_00022334, partial [Pocillopora damicornis]              | GCA_003704095.1 | TRADDN-DEDD2 |
| RMX57318.1     | GT4-GTase+TRADDN-DEDD2 | 570 | pdam_00021309      | cnidaria | Pocillopora damicornis | hypothetical protein pdam_00021309, partial [Pocillopora damicornis]              | GCA_003704095.1 | TRADDN-DEDD2 |
| RMX57323.1     | GT4-GTase+TRADDN-DEDD2 | 490 | pdam_00021310      | cnidaria | Pocillopora damicornis | hypothetical protein pdam_00021310 [Pocillopora damicornis]                       | GCA_003704095.1 | TRADDN-DEDD2 |
| PFX16627.1     | GT4-GTase+TRADDN-DEDD2 | 784 | mshA               | cnidaria | Stylophora pistillata  | D-inositol 3-phosphate glycosyltransferase [Stylophora pistillata]                | GCA_002571385.1 | TRADDN-DEDD2 |
| PFX22046.1     | GT4-GTase+TRADDN-DEDD2 | 659 | mshA               | cnidaria | Stylophora pistillata  | D-inositol 3-phosphate glycosyltransferase [Stylophora pistillata]                | GCA_002571385.1 | TRADDN-DEDD2 |
| PFX28903.1     | GT4-GTase+TRADDN-DEDD2 | 693 | AWC38_SpisGene6346 | cnidaria | Stylophora pistillata  | putative glycosyltransferase MJ1607 [Stylophora pistillata]                       | GCA_002571385.1 | TRADDN-DEDD2 |
| PFX32397.1     | GT4-GTase+TRADDN-DEDD2 | 493 | mshA               | cnidaria | Stylophora pistillata  | D-inositol 3-phosphate glycosyltransferase [Stylophora pistillata]                | GCA_002571385.1 | TRADDN-DEDD2 |
| XP_022777916.1 | GT4-GTase+TRADDN-DEDD2 | 553 | LOC111319398       | cnidaria | Stylophora pistillata  | uncharacterized protein LOC111319398 [Stylophora pistillata]                      | GCF_002571385.1 | TRADDN-DEDD2 |
| XP_022779373.1 | GT4-GTase+TRADDN-DEDD2 | 292 | LOC111320905       | cnidaria | Stylophora pistillata  | uncharacterized protein LOC111320905 [Stylophora pistillata]                      | GCF_002571385.1 | TRADDN-DEDD2 |
| XP_022780314.1 | GT4-GTase+TRADDN-DEDD2 | 666 | LOC111321639       | cnidaria | Stylophora pistillata  | LOW QUALITY PROTEIN: uncharacterized protein LOC111321639 [Stylophora pistillata] | GCF_002571385.1 | TRADDN-DEDD2 |
| XP_022785147.1 | GT4-GTase+TRADDN-DEDD2 | 731 | LOC111325582       | cnidaria | Stylophora pistillata  | uncharacterized protein LOC111325582 [Stylophora pistillata]                      | GCF_002571385.1 | TRADDN-DEDD2 |
| XP_022785159.1 | GT4-GTase+TRADDN-DEDD2 | 709 | LOC111325594       | cnidaria | Stylophora pistillata  | uncharacterized protein LOC111325594 [Stylophora pistillata]                      | GCF_002571385.1 | TRADDN-DEDD2 |
| XP_022790555.1 | GT4-GTase+TRADDN-DEDD2 | 676 | LOC111330032       | cnidaria | Stylophora pistillata  | uncharacterized protein LOC111330032 isoform X1 [Stylophora pistillata]           | GCF_002571385.1 | TRADDN-DEDD2 |
| XP_022790556.1 | GT4-GTase+TRADDN-DEDD2 | 675 | LOC111330032       | cnidaria | Stylophora pistillata  | uncharacterized protein LOC111330032 isoform X2 [Stylophora pistillata]           | GCF_002571385.1 | TRADDN-DEDD2 |
| XP_022796266.1 | GT4-GTase+TRADDN-DEDD2 | 729 | LOC111334716       | cnidaria | Stylophora pistillata  | uncharacterized protein LOC111334716 [Stylophora pistillata]                      | GCF_002571385.1 | TRADDN-DEDD2 |
| XP_022804734.1 | GT4-GTase+TRADDN-DEDD2 | 554 | LOC111341951       | cnidaria | Stylophora pistillata  | uncharacterized protein LOC111341951 [Stylophora pistillata]                      | GCF_002571385.1 | TRADDN-DEDD2 |
| XP_022809575.1 | GT4-GTase+TRADDN-DEDD2 | 431 | LOC111346560       | cnidaria | Stylophora pistillata  | uncharacterized protein LOC111346560, partial [Stylophora pistillata]             | GCF_002571385.1 | TRADDN-DEDD2 |

| acc            | architecture                   | len  | gen.name     | taxend   | species               | define                                                                            | gca             | clade        |
|----------------|--------------------------------|------|--------------|----------|-----------------------|-----------------------------------------------------------------------------------|-----------------|--------------|
| XP_022809578.1 | GT4-GTase+TRADDN-DEDD2         | 746  | LOC111346564 | cnidaria | Stylophora pistillata | uncharacterized protein LOC111346564 [Stylophora pistillata]                      | GCF_002571385.1 | TRADDN-DEDD2 |
| XP_015754284.1 | GT4-GTase+TRADDN-DEDD2+Ankyrin | 1391 | LOC107333936 | cnidaria | Acropora digitifera   | PREDICTED: uncharacterized protein LOC107333936 isoform X1 [Acropora digitifera]  | GCF_000222465.1 | TRADDN-DEDD2 |
| XP_015754287.1 | GT4-GTase+TRADDN-DEDD2+Ankyrin | 1391 | LOC107333936 | cnidaria | Acropora digitifera   | PREDICTED: uncharacterized protein LOC107333936 isoform X2 [Acropora digitifera]  | GCF_000222465.1 | TRADDN-DEDD2 |
| XP_015754288.1 | GT4-GTase+TRADDN-DEDD2+Ankyrin | 1351 | LOC107333936 | cnidaria | Acropora digitifera   | PREDICTED: uncharacterized protein LOC107333936 isoform X3 [Acropora digitifera]  | GCF_000222465.1 | TRADDN-DEDD2 |
| XP_015765548.1 | GT4-GTase+TRADDN-DEDD2+Ankyrin | 1084 | LOC107344415 | cnidaria | Acropora digitifera   | PREDICTED: uncharacterized protein LOC107344415 isoform X1 [Acropora digitifera]  | GCF_000222465.1 | TRADDN-DEDD2 |
| XP_015765549.1 | GT4-GTase+TRADDN-DEDD2+Ankyrin | 1083 | LOC107344415 | cnidaria | Acropora digitifera   | PREDICTED: uncharacterized protein LOC107344415 isoform X2 [Acropora digitifera]  | GCF_000222465.1 | TRADDN-DEDD2 |
| XP_015777357.1 | GT4-GTase+TRADDN-DEDD2+Ankyrin | 1436 | LOC107355329 | cnidaria | Acropora digitifera   | PREDICTED: uncharacterized protein LOC107355329 isoform X1 [Acropora digitifera]  | GCF_000222465.1 | TRADDN-DEDD2 |
| XP_015777358.1 | GT4-GTase+TRADDN-DEDD2+Ankyrin | 1420 | LOC107355329 | cnidaria | Acropora digitifera   | PREDICTED: uncharacterized protein LOC107355329 isoform X2 [Acropora digitifera]  | GCF_000222465.1 | TRADDN-DEDD2 |
| XP_015777359.1 | GT4-GTase+TRADDN-DEDD2+Ankyrin | 1420 | LOC107355329 | cnidaria | Acropora digitifera   | PREDICTED: uncharacterized protein LOC107355329 isoform X3 [Acropora digitifera]  | GCF_000222465.1 | TRADDN-DEDD2 |
| XP_015777360.1 | GT4-GTase+TRADDN-DEDD2+Ankyrin | 1404 | LOC107355329 | cnidaria | Acropora digitifera   | PREDICTED: uncharacterized protein LOC107355329 isoform X4 [Acropora digitifera]  | GCF_000222465.1 | TRADDN-DEDD2 |
| XP_015777361.1 | GT4-GTase+TRADDN-DEDD2+Ankyrin | 1400 | LOC107355329 | cnidaria | Acropora digitifera   | PREDICTED: uncharacterized protein LOC107355329 isoform X5 [Acropora digitifera]  | GCF_000222465.1 | TRADDN-DEDD2 |
| XP_015777362.1 | GT4-GTase+TRADDN-DEDD2+Ankyrin | 1388 | LOC107355329 | cnidaria | Acropora digitifera   | PREDICTED: uncharacterized protein LOC107355329 isoform X6 [Acropora digitifera]  | GCF_000222465.1 | TRADDN-DEDD2 |
| XP_015777363.1 | GT4-GTase+TRADDN-DEDD2+Ankyrin | 1388 | LOC107355329 | cnidaria | Acropora digitifera   | PREDICTED: uncharacterized protein LOC107355329 isoform X7 [Acropora digitifera]  | GCF_000222465.1 | TRADDN-DEDD2 |
| XP_015777365.1 | GT4-GTase+TRADDN-DEDD2+Ankyrin | 1388 | LOC107355329 | cnidaria | Acropora digitifera   | PREDICTED: uncharacterized protein LOC107355329 isoform X8 [Acropora digitifera]  | GCF_000222465.1 | TRADDN-DEDD2 |
| XP_015777366.1 | GT4-GTase+TRADDN-DEDD2+Ankyrin | 1384 | LOC107355329 | cnidaria | Acropora digitifera   | PREDICTED: uncharacterized protein LOC107355329 isoform X9 [Acropora digitifera]  | GCF_000222465.1 | TRADDN-DEDD2 |
| XP_015777367.1 | GT4-GTase+TRADDN-DEDD2+Ankyrin | 1372 | LOC107355329 | cnidaria | Acropora digitifera   | PREDICTED: uncharacterized protein LOC107355329 isoform X10 [Acropora digitifera] | GCF_000222465.1 | TRADDN-DEDD2 |
| XP_015777368.1 | GT4-GTase+TRADDN-DEDD2+Ankyrin | 1372 | LOC107355329 | cnidaria | Acropora digitifera   | PREDICTED: uncharacterized protein LOC107355329 isoform X11 [Acropora digitifera] | GCF_000222465.1 | TRADDN-DEDD2 |

| acc            | architecture                                     | len  | gen.name     | taxend   | species               | define                                                                                     | gca             | clade        |
|----------------|--------------------------------------------------|------|--------------|----------|-----------------------|--------------------------------------------------------------------------------------------|-----------------|--------------|
| XP_015777369.1 | GT4-GTase+TRADDN-DEDD2+Ankyrin                   | 1372 | LOC107355329 | cnidaria | Acropora digitifera   | PREDICTED: uncharacterized protein LOC107355329 isoform X12 [Acropora digitifera]          | GCF_000222465.1 | TRADDN-DEDD2 |
| XP_015777370.1 | GT4-GTase+TRADDN-DEDD2+Ankyrin                   | 1372 | LOC107355329 | cnidaria | Acropora digitifera   | PREDICTED: uncharacterized protein LOC107355329 isoform X13 [Acropora digitifera]          | GCF_000222465.1 | TRADDN-DEDD2 |
| XP_015777371.1 | GT4-GTase+TRADDN-DEDD2+Ankyrin                   | 1368 | LOC107355329 | cnidaria | Acropora digitifera   | PREDICTED: uncharacterized protein LOC107355329 isoform X14 [Acropora digitifera]          | GCF_000222465.1 | TRADDN-DEDD2 |
| XP_015777372.1 | GT4-GTase+TRADDN-DEDD2+Ankyrin                   | 1356 | LOC107355329 | cnidaria | Acropora digitifera   | PREDICTED: uncharacterized protein LOC107355329 isoform X15 [Acropora digitifera]          | GCF_000222465.1 | TRADDN-DEDD2 |
| XP_015777373.1 | GT4-GTase+TRADDN-DEDD2+Ankyrin                   | 1356 | LOC107355329 | cnidaria | Acropora digitifera   | PREDICTED: uncharacterized protein LOC107355329 isoform X16 [Acropora digitifera]          | GCF_000222465.1 | TRADDN-DEDD2 |
| XP_015777374.1 | GT4-GTase+TRADDN-DEDD2+Ankyrin                   | 1352 | LOC107355329 | cnidaria | Acropora digitifera   | PREDICTED: uncharacterized protein LOC107355329 isoform X17 [Acropora digitifera]          | GCF_000222465.1 | TRADDN-DEDD2 |
| XP_015777375.1 | GT4-GTase+TRADDN-DEDD2+Ankyrin                   | 878  | LOC107355332 | cnidaria | Acropora digitifera   | PREDICTED: ankyrin-1-like [Acropora digitifera]                                            | GCF_000222465.1 | TRADDN-DEDD2 |
| XP_015778952.1 | GT4-GTase+TRADDN-DEDD2+Ankyrin                   | 1280 | LOC107356842 | cnidaria | Acropora digitifera   | PREDICTED: uncharacterized protein LOC107356842 [Acropora digitifera]                      | GCF_000222465.1 | TRADDN-DEDD2 |
| XP_015779234.1 | GT4-GTase+TRADDN-DEDD2+Ankyrin                   | 1392 | LOC107357096 | cnidaria | Acropora digitifera   | PREDICTED: ankyrin-3-like [Acropora digitifera]                                            | GCF_000222465.1 | TRADDN-DEDD2 |
| XP_015779236.1 | GT4-GTase+TRADDN-DEDD2+Ankyrin                   | 1086 | LOC107357098 | cnidaria | Acropora digitifera   | PREDICTED: uncharacterized protein LOC107357098 [Acropora digitifera]                      | GCF_000222465.1 | TRADDN-DEDD2 |
| XP_015780567.1 | GT4-GTase+TRADDN-DEDD2+Ankyrin                   | 1294 | LOC107358478 | cnidaria | Acropora digitifera   | PREDICTED: uncharacterized protein LOC107358478 [Acropora digitifera]                      | GCF_000222465.1 | TRADDN-DEDD2 |
| PFX11667.1     | GT4-GTase+TRADDN-DEDD2+Ankyrin                   | 1115 | Ankyrin3     | cnidaria | Stylophora pistillata | Ankyrin-3 [Stylophora pistillata]                                                          | GCA_002571385.1 | TRADDN-DEDD2 |
| XP_015754281.1 | GT4-GTase+TRADDN-DEDD2+Ankyrin+DED+APATPase+TPRs | 1597 | LOC107333935 | cnidaria | Acropora digitifera   | PREDICTED: uncharacterized protein LOC107333935 isoform X1 [Acropora digitifera]           | GCF_000222465.1 | TRADDN-DEDD2 |
| XP_015754282.1 | GT4-GTase+TRADDN-DEDD2+Ankyrin+DED+APATPase+TPRs | 1560 | LOC107333935 | cnidaria | Acropora digitifera   | PREDICTED: uncharacterized protein LOC107333935 isoform X2 [Acropora digitifera]           | GCF_000222465.1 | TRADDN-DEDD2 |
| XP_015754283.1 | GT4-GTase+TRADDN-DEDD2+Ankyrin+DED+APATPase+TPRs | 1546 | LOC107333935 | cnidaria | Acropora digitifera   | PREDICTED: uncharacterized protein LOC107333935 isoform X3 [Acropora digitifera]           | GCF_000222465.1 | TRADDN-DEDD2 |
| XP_020630898.1 | GT4-GTase+TRADDN-DEDD2+APGTPase                  | 866  | LOC110067895 | cnidaria | Orbicella faveolata   | uncharacterized protein LOC110067895 [Orbicella faveolata]                                 | GCF_002042975.1 | TRADDN-DEDD2 |
| XP_015768823.1 | GT4-GTase+TRADDN-DEDD2+Death                     | 402  | LOC107347423 | cnidaria | Acropora digitifera   | PREDICTED: uncharacterized protein LOC107347423 [Acropora digitifera]                      | GCF_000222465.1 | TRADDN-DEDD2 |
| XP_022786056.1 | GT4-GTase+TRADDN-DEDD2+Death                     | 917  | LOC111326347 | cnidaria | Stylophora pistillata | uncharacterized protein LOC111326347 [Stylophora pistillata]                               | GCF_002571385.1 | TRADDN-DEDD2 |
| XP_015754270.1 | GT4-GTase+TRADDN-DEDD2+DUF4062+STAND             | 1358 | LOC107333920 | cnidaria | Acropora digitifera   | PREDICTED: LOW QUALITY PROTEIN: uncharacterized protein LOC107333920 [Acropora digitifera] | GCF_000222465.1 | TRADDN-DEDD2 |

| acc            | architecture                                                                                                                                                                        | len  | gen.name     | taxend   | species               | define                                                                           | gca             | clade        |
|----------------|-------------------------------------------------------------------------------------------------------------------------------------------------------------------------------------|------|--------------|----------|-----------------------|----------------------------------------------------------------------------------|-----------------|--------------|
| XP_020614207.1 | GT4-GTase+TRADDN-DEDD2+GBP+GBP_C                                                                                                                                                    | 986  | LOC110052421 | cnidaria | Orbicella faveolata   | uncharacterized protein<br>LOC110052421 isoform X1<br>[Orbicella faveolata]      | GCF_002042975.1 | TRADDN-DEDD2 |
| XP_015765571.1 | GT4-GTase+TRADDN-DEDD2+GT4-GTase                                                                                                                                                    | 1248 | LOC107344438 | cnidaria | Acropora digitifera   | PREDICTED: uncharacterized<br>protein LOC107344438 [Acropora<br>digitifera]      | GCF_000222465.1 | TRADDN-DEDD2 |
| XP_015778949.1 | GT4-GTase+TRADDN-DEDD2+GT4-GTase                                                                                                                                                    | 1007 | LOC107356840 | cnidaria | Acropora digitifera   | PREDICTED: uncharacterized<br>protein LOC107356840 [Acropora<br>digitifera]      | GCF_000222465.1 | TRADDN-DEDD2 |
| XP_022804733.1 | GT4-GTase+TRADDN-DEDD2+helical-region+LRRs                                                                                                                                          | 1261 | LOC111341950 | cnidaria | Stylophora pistillata | uncharacterized protein<br>LOC111341950 isoform X6<br>[Stylophora pistillata]    | GCF_002571385.1 | TRADDN-DEDD2 |
| XP_022808343.1 | GT4-GTase+TRADDN-DEDD2+helical-region+LRRs                                                                                                                                          | 1234 | LOC111345328 | cnidaria | Stylophora pistillata | uncharacterized protein<br>LOC111345328 isoform X1<br>[Stylophora pistillata]    | GCF_002571385.1 | TRADDN-DEDD2 |
| XP_022808344.1 | GT4-GTase+TRADDN-DEDD2+helical-region+LRRs                                                                                                                                          | 1230 | LOC111345328 | cnidaria | Stylophora pistillata | uncharacterized protein<br>LOC111345328 isoform X2<br>[Stylophora pistillata]    | GCF_002571385.1 | TRADDN-DEDD2 |
| XP_022808345.1 | GT4-GTase+TRADDN-DEDD2+helical-region+LRRs                                                                                                                                          | 1214 | LOC111345328 | cnidaria | Stylophora pistillata | uncharacterized protein<br>LOC111345328 isoform X3<br>[Stylophora pistillata]    | GCF_002571385.1 | TRADDN-DEDD2 |
| PFX26360.1     | GT4-GTase+TRADDN-DEDD2+HSP90-Sacsin+DUF3684+HSP90-Sacsin+DUF3684+HSP90-Sacsin+DUF3684+DnaJ+HEPN                                                                                     | 4913 | SACS         | cnidaria | Stylophora pistillata | Sacsin, partial [Stylophora pistillata]                                          | GCA_002571385.1 | TRADDN-DEDD2 |
| PFX13778.1     | GT4-GTase+TRADDN-DEDD2+HSP90-Sacsin+DUF3684+HSP90-Sacsin+DUF3684+HSP90-Sacsin+DUF3684+HSP90-Sacsin+DUF3684+HSP90-Sacsin+DUF3684+HSP90-Sacsin+DUF3684+HSP90-Sacsin+DUF3684+DnaJ+HEPN | 9556 | SACS         | cnidaria | Stylophora pistillata | Sacsin [Stylophora pistillata]                                                   | GCA_002571385.1 | TRADDN-DEDD2 |
| XP_022809377.1 | GT4-GTase+TRADDN-DEDD2+HSP90-Sacsin+DUF3684+TRADDN-DEDD2+HSP90-Sacsin+DUF3684+DnaJ+HEPN                                                                                             | 4937 | LOC111346359 | cnidaria | Stylophora pistillata | sacsin-like [Stylophora pistillata]                                              | GCF_002571385.1 | TRADDN-DEDD2 |
| PFX19528.1     | GT4-GTase+TRADDN-DEDD2+low-complexity+Rossmann-fold+Octopine_DH                                                                                                                     | 1192 | tadh         | cnidaria | Stylophora pistillata | Tauropine dehydrogenase<br>[Stylophora pistillata]                               | GCA_002571385.1 | TRADDN-DEDD2 |
| XP_022800207.1 | GT4-GTase+TRADDN-DEDD2+low-complexity+Rossmann-fold+Octopine_DH                                                                                                                     | 1180 | LOC111338068 | cnidaria | Stylophora pistillata | uncharacterized protein<br>LOC111338068 isoform X1<br>[Stylophora pistillata]    | GCF_002571385.1 | TRADDN-DEDD2 |
| XP_022800208.1 | GT4-GTase+TRADDN-DEDD2+low-complexity+Rossmann-fold+Octopine_DH                                                                                                                     | 1179 | LOC111338068 | cnidaria | Stylophora pistillata | uncharacterized protein<br>LOC111338068 isoform X2<br>[Stylophora pistillata]    | GCF_002571385.1 | TRADDN-DEDD2 |
| XP_022800209.1 | GT4-GTase+TRADDN-DEDD2+low-complexity+Rossmann-fold+Octopine_DH                                                                                                                     | 1179 | LOC111338068 | cnidaria | Stylophora pistillata | uncharacterized protein<br>LOC111338068 isoform X3<br>[Stylophora pistillata]    | GCF_002571385.1 | TRADDN-DEDD2 |
| PFX31900.1     | GT4-GTase+TRADDN-DEDD2+P-loop-NTPase                                                                                                                                                | 1327 | HELZ         | cnidaria | Stylophora pistillata | putative helicase with zinc finger<br>domain, partial [Stylophora<br>pistillata] | GCA_002571385.1 | TRADDN-DEDD2 |
| PFX25676.1     | GT4-GTase+TRADDN-DEDD2+PNMA+zf-C2H2+SF1-helicase                                                                                                                                    | 1626 | MOV10        | cnidaria | Stylophora pistillata | putative helicase MOV-10<br>[Stylophora pistillata]                              | GCA_002571385.1 | TRADDN-DEDD2 |
| XP_015773770.1 | GT4-GTase+TRADDN-DEDD2+STAND+wHTH+helical-region+LRRs                                                                                                                               | 1843 | LOC107351981 | cnidaria | Acropora digitifera   | PREDICTED: uncharacterized<br>protein LOC107351981 [Acropora<br>digitifera]      | GCF_000222465.1 | TRADDN-DEDD2 |
| XP_015759411.1 | GT4-GTase+TRADDN-DEDD2+STAND+wHTH+helical-repeat+LRRs                                                                                                                               | 1346 | LOC107338694 | cnidaria | Acropora digitifera   | PREDICTED: uncharacterized<br>protein LOC107338694 [Acropora<br>digitifera]      | GCF_000222465.1 | TRADDN-DEDD2 |
| PFX28922.1     | GT4-GTase+TRADDN-DEDD2+TRADDN-DEDD2                                                                                                                                                 | 1022 | mshA         | cnidaria | Stylophora pistillata | D-inositol 3-phosphate<br>glycosyltransferase [Stylophora<br>pistillata]         | GCA_002571385.1 | TRADDN-DEDD2 |

| acc            | architecture                                                                                     | len  | gen.name     | taxend   | species               | define                                                                           | gca             | clade        |
|----------------|--------------------------------------------------------------------------------------------------|------|--------------|----------|-----------------------|----------------------------------------------------------------------------------|-----------------|--------------|
| XP_022785151.1 | GT4-GTase+TRADDN-DEDD2+TRADDN-DEDD2                                                              | 848  | LOC111325586 | cnidaria | Stylophora pistillata | uncharacterized protein LOC111325586 [Stylophora pistillata]                     | GCF_002571385.1 | TRADDN-DEDD2 |
| XP_015771496.1 | GT4-GTase+TRADDN-DEDD2+TRADDN-DEDD2+Coiled-coil+TPRs+RVT_1                                       | 1988 | LOC107349827 | cnidaria | Acropora digitifera   | PREDICTED: uncharacterized protein LOC107349827 [Acropora digitifera]            | GCF_000222465.1 | TRADDN-DEDD2 |
| PFX16629.1     | GT4-GTase+TRADDN-DEDD2+TRADDN-DEDD2+LRRs                                                         | 1560 | NLRP5        | cnidaria | Stylophora pistillata | NACHT, LRR and PYD domains-containing protein 5 [Stylophora pistillata]          | GCA_002571385.1 | TRADDN-DEDD2 |
| XP_022804727.1 | GT4-GTase+TRADDN-DEDD2+TRADDN-DEDD2+LRRs                                                         | 1529 | LOC111341950 | cnidaria | Stylophora pistillata | uncharacterized protein LOC111341950 isoform X1 [Stylophora pistillata]          | GCF_002571385.1 | TRADDN-DEDD2 |
| XP_022804728.1 | GT4-GTase+TRADDN-DEDD2+TRADDN-DEDD2+LRRs                                                         | 1522 | LOC111341950 | cnidaria | Stylophora pistillata | uncharacterized protein LOC111341950 isoform X2 [Stylophora pistillata]          | GCF_002571385.1 | TRADDN-DEDD2 |
| XP_022804730.1 | GT4-GTase+TRADDN-DEDD2+TRADDN-DEDD2+LRRs                                                         | 1521 | LOC111341950 | cnidaria | Stylophora pistillata | uncharacterized protein LOC111341950 isoform X3 [Stylophora pistillata]          | GCF_002571385.1 | TRADDN-DEDD2 |
| XP_022804731.1 | GT4-GTase+TRADDN-DEDD2+TRADDN-DEDD2+LRRs                                                         | 1517 | LOC111341950 | cnidaria | Stylophora pistillata | uncharacterized protein LOC111341950 isoform X4 [Stylophora pistillata]          | GCF_002571385.1 | TRADDN-DEDD2 |
| XP_022804732.1 | GT4-GTase+TRADDN-DEDD2+TRADDN-DEDD2+LRRs                                                         | 1516 | LOC111341950 | cnidaria | Stylophora pistillata | uncharacterized protein LOC111341950 isoform X5 [Stylophora pistillata]          | GCF_002571385.1 | TRADDN-DEDD2 |
| PFX29241.1     | GT4-GTase+TRADDN-DEDD2+TRADDN-DEDD2+PH+GT4-GTase+STING                                           | 1498 | Tmem173      | cnidaria | Stylophora pistillata | Stimulator of interferon genes protein [Stylophora pistillata]                   | GCA_002571385.1 | TRADDN-DEDD2 |
| XP_015765336.1 | GT4-GTase+TRADDN-DEDD2+UBI+UBI+UBI                                                               | 1194 | LOC107344209 | cnidaria | Acropora digitifera   | PREDICTED: uncharacterized protein LOC107344209 [Acropora digitifera]            | GCF_000222465.1 | TRADDN-DEDD2 |
| XP_020617495.1 | GT4-GTase+TRADDN-DEDD2+UBI+UBI+UBI+UBI+TRADDN-DEDD2+UBI+UBI+UBI+UBI+UBI+TRADDN-DEDD2+Coiled-coil | 1442 | LOC110055445 | cnidaria | Orbicella faveolata   | polyubiquitin-A-like isoform X1 [Orbicella faveolata]                            | GCF_002042975.1 | TRADDN-DEDD2 |
| XP_020617496.1 | GT4-GTase+TRADDN-DEDD2+UBI+UBI+UBI+UBI+TRADDN-DEDD2+UBI+UBI+UBI+UBI+UBI+TRADDN-DEDD2+Coiled-coil | 1220 | LOC110055445 | cnidaria | Orbicella faveolata   | polyubiquitin-A-like isoform X2 [Orbicella faveolata]                            | GCF_002042975.1 | TRADDN-DEDD2 |
| XP_015778868.1 | GT4-GTase+TRADDN-DEDD2+vWA+SERAprotease+ZnR                                                      | 1221 | LOC107356762 | cnidaria | Acropora digitifera   | PREDICTED: uncharacterized protein LOC107356762 isoform X1 [Acropora digitifera] | GCF_000222465.1 | TRADDN-DEDD2 |
| XP_015778871.1 | GT4-GTase+TRADDN-DEDD2+vWA+SERAprotease+ZnR                                                      | 1221 | LOC107356762 | cnidaria | Acropora digitifera   | PREDICTED: uncharacterized protein LOC107356762 isoform X2 [Acropora digitifera] | GCF_000222465.1 | TRADDN-DEDD2 |
| XP_015778873.1 | GT4-GTase+TRADDN-DEDD2+vWA+SERAprotease+ZnR                                                      | 1221 | LOC107356762 | cnidaria | Acropora digitifera   | PREDICTED: uncharacterized protein LOC107356762 isoform X3 [Acropora digitifera] | GCF_000222465.1 | TRADDN-DEDD2 |
| XP_015778874.1 | GT4-GTase+TRADDN-DEDD2+vWA+SERAprotease+ZnR                                                      | 1218 | LOC107356762 | cnidaria | Acropora digitifera   | PREDICTED: uncharacterized protein LOC107356762 isoform X4 [Acropora digitifera] | GCF_000222465.1 | TRADDN-DEDD2 |
| XP_015778875.1 | GT4-GTase+TRADDN-DEDD2+vWA+SERAprotease+ZnR                                                      | 1145 | LOC107356762 | cnidaria | Acropora digitifera   | PREDICTED: uncharacterized protein LOC107356762 isoform X5 [Acropora digitifera] | GCF_000222465.1 | TRADDN-DEDD2 |
| XP_015778876.1 | GT4-GTase+TRADDN-DEDD2+vWA+SERAprotease+ZnR                                                      | 1080 | LOC107356762 | cnidaria | Acropora digitifera   | PREDICTED: uncharacterized protein LOC107356762 isoform X6 [Acropora digitifera] | GCF_000222465.1 | TRADDN-DEDD2 |

| acc            | architecture                                                                   | len  | gen.name      | taxend   | species                | define                                                                            | gca             | clade        |
|----------------|--------------------------------------------------------------------------------|------|---------------|----------|------------------------|-----------------------------------------------------------------------------------|-----------------|--------------|
| XP_015778880.1 | GT4-GTase+TRADDN-DEDD2+vWA+SERAprotease+ZnR                                    | 1218 | LOC107356768  | cnidaria | Acropora digitifera    | PREDICTED: uncharacterized protein LOC107356768 isoform X2 [Acropora digitifera]  | GCF_000222465.1 | TRADDN-DEDD2 |
| XP_015778882.1 | GT4-GTase+TRADDN-DEDD2+vWA+SERAprotease+ZnR                                    | 1145 | LOC107356768  | cnidaria | Acropora digitifera    | PREDICTED: uncharacterized protein LOC107356768 isoform X3 [Acropora digitifera]  | GCF_000222465.1 | TRADDN-DEDD2 |
| PFX19725.1     | HEPN+Coiled-coil+TRADDN-DEDD2                                                  | 517  | Dzip3         | cnidaria | Stylophora pistillata  | E3 ubiquitin-protein ligase DZIP3 [Stylophora pistillata]                         | GCA_002571385.1 | TRADDN-DEDD2 |
| PFX24805.1     | HEPN+Coiled-coil+TRADDN-DEDD2                                                  | 535  | Dzip3         | cnidaria | Stylophora pistillata  | E3 ubiquitin-protein ligase DZIP3 [Stylophora pistillata]                         | GCA_002571385.1 | TRADDN-DEDD2 |
| XP_022791936.1 | HEPN+Coiled-coil+TRADDN-DEDD2                                                  | 514  | LOC111331144  | cnidaria | Stylophora pistillata  | uncharacterized protein LOC111331144 [Stylophora pistillata]                      | GCF_002571385.1 | TRADDN-DEDD2 |
| XP_020604217.1 | HEPN+Coiled-coil+TRADDN-DEDD2+Ankyrin+LRRs+APGTPase+COR+Pkinase+Beta-propeller | 2876 | LOC110043138  | cnidaria | Orbicella faveolata    | uncharacterized protein LOC110043138 isoform X1 [Orbicella faveolata]             | GCF_002042975.1 | TRADDN-DEDD2 |
| XP_020604218.1 | HEPN+Coiled-coil+TRADDN-DEDD2+Ankyrin+LRRs+APGTPase+COR+Pkinase+Beta-propeller | 2875 | LOC110043138  | cnidaria | Orbicella faveolata    | uncharacterized protein LOC110043138 isoform X2 [Orbicella faveolata]             | GCF_002042975.1 | TRADDN-DEDD2 |
| XP_022788761.1 | HEPN+Coiled-coil+TRADDN-DEDD2+Coiled-coil+TM                                   | 528  | LOC111328564  | cnidaria | Stylophora pistillata  | E3 ubiquitin-protein ligase DZIP3-like [Stylophora pistillata]                    | GCF_002571385.1 | TRADDN-DEDD2 |
| XP_020627088.1 | HEPN+Coiled-coil+TRADDN-DEDD2+Dynammin-like_sGTPase+Pkinase                    | 1240 | LOC110064381  | cnidaria | Orbicella faveolata    | uncharacterized protein LOC110064381 [Orbicella faveolata]                        | GCF_002042975.1 | TRADDN-DEDD2 |
| XP_020616738.1 | HEPN+Coiled-coil+TRADDN-DEDD2+HEPN+Coiled-coil                                 | 911  | LOC110054720  | cnidaria | Orbicella faveolata    | uncharacterized protein LOC110054720 [Orbicella faveolata]                        | GCF_002042975.1 | TRADDN-DEDD2 |
| XP_020616797.1 | HEPN+Coiled-coil+TRADDN-DEDD2+KH                                               | 549  | LOC110054780  | cnidaria | Orbicella faveolata    | uncharacterized protein LOC110054780 isoform X1 [Orbicella faveolata]             | GCF_002042975.1 | TRADDN-DEDD2 |
| XP_020632576.1 | HEPN+Coiled-coil+TRADDN-DEDD2+KH                                               | 580  | LOC110069390  | cnidaria | Orbicella faveolata    | uncharacterized protein LOC110069390 isoform X1 [Orbicella faveolata]             | GCF_002042975.1 | TRADDN-DEDD2 |
| XP_020632577.1 | HEPN+Coiled-coil+TRADDN-DEDD2+KH                                               | 563  | LOC110069390  | cnidaria | Orbicella faveolata    | uncharacterized protein LOC110069390 isoform X2 [Orbicella faveolata]             | GCF_002042975.1 | TRADDN-DEDD2 |
| RMX55969.1     | HEPN+Coiled-coil+TRADDN-DEDD2+KH                                               | 390  | pdam_00023994 | cnidaria | Pocillopora damicornis | hypothetical protein pdam_00023994 [Pocillopora damicornis]                       | GCA_003704095.1 | TRADDN-DEDD2 |
| RMX48053.1     | HEPN+Coiled-coil+TRADDN-DEDD2+RRM+RRM+KH+KH+KH+KH+KH+KH+KH+KH+Macro+Macro+PARP | 2135 | pdam_00002642 | cnidaria | Pocillopora damicornis | hypothetical protein pdam_00002642 [Pocillopora damicornis]                       | GCA_003704095.1 | TRADDN-DEDD2 |
| XP_022804139.1 | HEPN+Coiled-coil+TRADDN-DEDD2+RRM+RRM+KH+KH+KH+KH+KH+KH+KH+KH+Macro+Macro+PARP | 2107 | LOC111341437  | cnidaria | Stylophora pistillata  | LOW QUALITY PROTEIN; poly [ADP-ribose] polymerase 14-like [Stylophora pistillata] | GCF_002571385.1 | TRADDN-DEDD2 |
| XP_022809699.1 | HEPN+Coiled-coil+TRADDN-DEDD2+STAND+wHTH+TPRs                                  | 1142 | LOC111346660  | cnidaria | Stylophora pistillata  | uncharacterized protein LOC111346660 [Stylophora pistillata]                      | GCF_002571385.1 | TRADDN-DEDD2 |
| RMX40274.1     | HEPN+Coiled-coil+TRADDN-DEDD2+TPRs                                             | 829  | pdam_00008680 | cnidaria | Pocillopora damicornis | hypothetical protein pdam_00008680 [Pocillopora damicornis]                       | GCA_003704095.1 | TRADDN-DEDD2 |
| XP_020617640.1 | HEPN+Coiled-coil+TRADDN-DEDD2+UBI+UBI                                          | 765  | LOC110055589  | cnidaria | Orbicella faveolata    | uncharacterized protein LOC110055589 [Orbicella faveolata]                        | GCF_002042975.1 | TRADDN-DEDD2 |

| acc            | architecture                                                         | len  | gen.name            | taxend   | species                | define                                                                | gca             | clade        |
|----------------|----------------------------------------------------------------------|------|---------------------|----------|------------------------|-----------------------------------------------------------------------|-----------------|--------------|
| PFX19302.1     | HEPN+Coiled-coil+TRADDN-DEDD2+UBI+UBI+UBI+UBI+UBI+UBI+UBI+DDE_Tnp_4  | 1518 | UBC                 | cnidaria | Stylophora pistillata  | Polyubiquitin-C [Stylophora pistillata]                               | GCA_002571385.1 | TRADDN-DEDD2 |
| XP_022800602.1 | HEPN+Coiled-coil+TRADDN-DEDD2+UBI+UBI+UBI+UBI+UBI+UBI+UBI+UBI        | 1069 | LOC111338383        | cnidaria | Stylophora pistillata  | uncharacterized protein LOC111338383 [Stylophora pistillata]          | GCF_002571385.1 | TRADDN-DEDD2 |
| XP_022800615.1 | HEPN+Coiled-coil+TRADDN-DEDD2+UBI+UBI+UBI+UBI+UBI+UBI+UBI+UBI        | 1227 | LOC111338392        | cnidaria | Stylophora pistillata  | LOW QUALITY PROTEIN: polyubiquitin-C-like [Stylophora pistillata]     | GCF_002571385.1 | TRADDN-DEDD2 |
| XP_020629970.1 | HEPN+Coiled-coil+TRADDN-DEDD2+ZU5+ZU5+UPA                            | 1199 | LOC110067038        | cnidaria | Orbicella faveolata    | uncharacterized protein LOC110067038 isoform X1 [Orbicella faveolata] | GCF_002042975.1 | TRADDN-DEDD2 |
| XP_020629971.1 | HEPN+Coiled-coil+TRADDN-DEDD2+ZU5+ZU5+UPA                            | 1198 | LOC110067038        | cnidaria | Orbicella faveolata    | uncharacterized protein LOC110067038 isoform X2 [Orbicella faveolata] | GCF_002042975.1 | TRADDN-DEDD2 |
| XP_020629972.1 | HEPN+Coiled-coil+TRADDN-DEDD2+ZU5+ZU5+UPA                            | 1197 | LOC110067038        | cnidaria | Orbicella faveolata    | uncharacterized protein LOC110067038 isoform X3 [Orbicella faveolata] | GCF_002042975.1 | TRADDN-DEDD2 |
| XP_020629973.1 | HEPN+Coiled-coil+TRADDN-DEDD2+ZU5+ZU5+UPA                            | 1155 | LOC110067038        | cnidaria | Orbicella faveolata    | uncharacterized protein LOC110067038 isoform X4 [Orbicella faveolata] | GCF_002042975.1 | TRADDN-DEDD2 |
| KXJ10812.1     | HEPN+TRADDN-DEDD2                                                    | 656  | DZIP3               | cnidaria | Exaiptasia pallida     | E3 ubiquitin-protein ligase DZIP3 [Exaiptasia pallida]                | GCA_001417965.1 | TRADDN-DEDD2 |
| KXJ12478.1     | HEPN+TRADDN-DEDD2                                                    | 472  | AC249_AIPGENE12578  | cnidaria | Exaiptasia pallida     | hypothetical protein AC249_AIPGENE12578 [Exaiptasia pallida]          | GCA_001417965.1 | TRADDN-DEDD2 |
| XP_020604617.1 | HEPN+TRADDN-DEDD2                                                    | 415  | LOC110043500        | cnidaria | Orbicella faveolata    | uncharacterized protein LOC110043500 [Orbicella faveolata]            | GCF_002042975.1 | TRADDN-DEDD2 |
| XP_020628007.1 | HEPN+TRADDN-DEDD2                                                    | 388  | LOC110065239        | cnidaria | Orbicella faveolata    | E3 ubiquitin-protein ligase DZIP3-like [Orbicella faveolata]          | GCF_002042975.1 | TRADDN-DEDD2 |
| RMX39187.1     | HEPN+TRADDN-DEDD2                                                    | 222  | pdam_00013525       | cnidaria | Pocillopora damicornis | hypothetical protein pdam_00013525 [Pocillopora damicornis]           | GCA_003704095.1 | TRADDN-DEDD2 |
| RMX48238.1     | HEPN+TRADDN-DEDD2                                                    | 262  | pdam_00005399       | cnidaria | Pocillopora damicornis | hypothetical protein pdam_00005399 [Pocillopora damicornis]           | GCA_003704095.1 | TRADDN-DEDD2 |
| PFX23548.1     | HEPN+TRADDN-DEDD2                                                    | 419  | AWC38_SpisGene11915 | cnidaria | Stylophora pistillata  | hypothetical protein AWC38_SpisGene11915 [Stylophora pistillata]      | GCA_002571385.1 | TRADDN-DEDD2 |
| XP_022802965.1 | HEPN+TRADDN-DEDD2                                                    | 393  | LOC111340387        | cnidaria | Stylophora pistillata  | uncharacterized protein LOC111340387 [Stylophora pistillata]          | GCF_002571385.1 | TRADDN-DEDD2 |
| PFX15141.1     | HEPN+TRADDN-DEDD2+Ankyrin+ZU5+ZU5+THAP+Coiled-coil+HTH+HTH+DDE_Tnp_4 | 1450 | Dzip3               | cnidaria | Stylophora pistillata  | E3 ubiquitin-protein ligase DZIP3 [Stylophora pistillata]             | GCA_002571385.1 | TRADDN-DEDD2 |
| XP_020625600.1 | HEPN+TRADDN-DEDD2+CASPASE                                            | 726  | LOC110062993        | cnidaria | Orbicella faveolata    | uncharacterized protein LOC110062993 [Orbicella faveolata]            | GCF_002042975.1 | TRADDN-DEDD2 |
| PFX17858.1     | HEPN+TRADDN-DEDD2+Coiled-coil+Pkinase                                | 717  | Tnni3k              | cnidaria | Stylophora pistillata  | Serine/threonine-protein kinase TNNI3K [Stylophora pistillata]        | GCA_002571385.1 | TRADDN-DEDD2 |
| XP_022791026.1 | HEPN+TRADDN-DEDD2+Coiled-coil+TPRs                                   | 597  | LOC111330432        | cnidaria | Stylophora pistillata  | uncharacterized protein LOC111330432 [Stylophora pistillata]          | GCF_002571385.1 | TRADDN-DEDD2 |
| PFX13296.1     | HEPN+TRADDN-DEDD2+Filamin+Beta-propeller                             | 1115 | trim71              | cnidaria | Stylophora pistillata  | E3 ubiquitin-protein ligase TRIM71 [Stylophora pistillata]            | GCA_002571385.1 | TRADDN-DEDD2 |



| acc            | architecture                                    | len  | gen.name     | taxend   | species               | define                                                                  | gca             | clade        |
|----------------|-------------------------------------------------|------|--------------|----------|-----------------------|-------------------------------------------------------------------------|-----------------|--------------|
| XP_022799946.1 | HEPN+TRADDN-DEDD2+Filamin+Beta-propeller        | 1041 | LOC111337842 | cnidaria | Stylophora pistillata | uncharacterized protein LOC111337842 [Stylophora pistillata]            | GCF_002571385.1 | TRADDN-DEDD2 |
| XP_020906505.1 | HEPN+TRADDN-DEDD2+HEPN+TRADDN-DEDD2             | 937  | LOC110244637 | cnidaria | Exaiptasia pallida    | uncharacterized protein LOC110244637 [Exaiptasia pallida]               | GCF_001417965.1 | TRADDN-DEDD2 |
| XP_020602264.1 | HEPN+TRADDN-DEDD2+P-loop-NTPase                 | 537  | LOC110041324 | cnidaria | Orbicella faveolata   | uncharacterized protein LOC110041324 [Orbicella faveolata]              | GCF_002042975.1 | TRADDN-DEDD2 |
| PFX17023.1     | HEPN+TRADDN-DEDD2+RRM+KH+KH+KH+Macro+Macro+PARP | 2052 | PARP14       | cnidaria | Stylophora pistillata | Poly [ADP-ribose] polymerase 14 [Stylophora pistillata]                 | GCA_002571385.1 | TRADDN-DEDD2 |
| PFX17028.1     | HEPN+TRADDN-DEDD2+RRM+KH+KH+KH+Macro+Macro+PARP | 1990 | PARP14       | cnidaria | Stylophora pistillata | Poly [ADP-ribose] polymerase 14 [Stylophora pistillata]                 | GCA_002571385.1 | TRADDN-DEDD2 |
| XP_022804128.1 | HEPN+TRADDN-DEDD2+RRM+RRM                       | 694  | LOC111341426 | cnidaria | Stylophora pistillata | uncharacterized protein LOC111341426 [Stylophora pistillata]            | GCF_002571385.1 | TRADDN-DEDD2 |
| KXJ06110.1     | HEPN+TRADDN-DEDD2+SF2-helicase                  | 767  | DDX58        | cnidaria | Exaiptasia pallida    | putative ATP-dependent RNA helicase DDX58, partial [Exaiptasia pallida] | GCA_001417965.1 | TRADDN-DEDD2 |
| XP_020906364.1 | HEPN+TRADDN-DEDD2+SF2-helicase                  | 766  | LOC110244496 | cnidaria | Exaiptasia pallida    | probable ATP-dependent RNA helicase DDX58, partial [Exaiptasia pallida] | GCF_001417965.1 | TRADDN-DEDD2 |
| XP_015749627.1 | HEPN+TRADDN-DEDD2+STAND+wHTH+TPRs               | 1188 | LOC107329454 | cnidaria | Acropora digitifera   | PREDICTED: uncharacterized protein LOC107329454 [Acropora digitifera]   | GCF_000222465.1 | TRADDN-DEDD2 |
| KXJ10800.1     | HEPN+TRADDN-DEDD2+TPRs                          | 597  | DZIP3        | cnidaria | Exaiptasia pallida    | E3 ubiquitin-protein ligase DZIP3 [Exaiptasia pallida]                  | GCA_001417965.1 | TRADDN-DEDD2 |
| KXJ15695.1     | HEPN+TRADDN-DEDD2+TPRs                          | 524  | Ttc28        | cnidaria | Exaiptasia pallida    | Tetratricopeptide repeat protein 28 [Exaiptasia pallida]                | GCA_001417965.1 | TRADDN-DEDD2 |
| XP_020898253.1 | HEPN+TRADDN-DEDD2+TPRs                          | 509  | LOC110237022 | cnidaria | Exaiptasia pallida    | uncharacterized protein LOC110237022 [Exaiptasia pallida]               | GCF_001417965.1 | TRADDN-DEDD2 |
| PFX19470.1     | HEPN+TRADDN-DEDD2+TPRs                          | 1185 | nphp3        | cnidaria | Stylophora pistillata | Nephrocystin-3 [Stylophora pistillata]                                  | GCA_002571385.1 | TRADDN-DEDD2 |
| XP_022810481.1 | HEPN+TRADDN-DEDD2+TPRs                          | 558  | LOC111347506 | cnidaria | Stylophora pistillata | uncharacterized protein LOC111347506, partial [Stylophora pistillata]   | GCF_002571385.1 | TRADDN-DEDD2 |
| KXJ10818.1     | HEPN+TRADDN-DEDD2+TPRs+TM+TM                    | 590  | DZIP3        | cnidaria | Exaiptasia pallida    | E3 ubiquitin-protein ligase DZIP3 [Exaiptasia pallida]                  | GCA_001417965.1 | TRADDN-DEDD2 |
| XP_020628005.1 | HEPN+TRADDN-DEDD2+TRADDN-DEDD2                  | 510  | LOC110065237 | cnidaria | Orbicella faveolata   | uncharacterized protein LOC110065237 isoform X1 [Orbicella faveolata]   | GCF_002042975.1 | TRADDN-DEDD2 |
| XP_020628006.1 | HEPN+TRADDN-DEDD2+TRADDN-DEDD2                  | 509  | LOC110065237 | cnidaria | Orbicella faveolata   | uncharacterized protein LOC110065237 isoform X2 [Orbicella faveolata]   | GCF_002042975.1 | TRADDN-DEDD2 |
| PFX17772.1     | HEPN+TRADDN-DEDD2+TRADDN-DEDD2                  | 550  | Dzip3        | cnidaria | Stylophora pistillata | E3 ubiquitin-protein ligase DZIP3 [Stylophora pistillata]               | GCA_002571385.1 | TRADDN-DEDD2 |
| XP_020629974.1 | HEPN+TRADDN-DEDD2+ZU5+ZU5+UPA                   | 1001 | LOC110067038 | cnidaria | Orbicella faveolata   | uncharacterized protein LOC110067038 isoform X5 [Orbicella faveolata]   | GCF_002042975.1 | TRADDN-DEDD2 |
| XP_022803160.1 | HEPN+TRADDN-DEDD2+ZU5+ZU5+UPA+Death             | 1141 | LOC111340569 | cnidaria | Stylophora pistillata | uncharacterized protein LOC111340569 isoform X1 [Stylophora pistillata] | GCF_002571385.1 | TRADDN-DEDD2 |

| acc            | architecture                                                                 | len  | gen.name             | taxend   | species                | define                                                                        | gca             | clade                     |
|----------------|------------------------------------------------------------------------------|------|----------------------|----------|------------------------|-------------------------------------------------------------------------------|-----------------|---------------------------|
| XP_022806853.1 | HEPN+TRADDN-DEDD2+ZU5+ZU5+UPA+Death                                          | 1232 | LOC111343921         | cnidaria | Stylophora pistillata  | uncharacterized protein<br>LOC111343921 isoform X1<br>[Stylophora pistillata] | GCF_002571385.1 | TRADDN-DEDD2              |
| XP_022806854.1 | HEPN+TRADDN-DEDD2+ZU5+ZU5+UPA+Death                                          | 1231 | LOC111343921         | cnidaria | Stylophora pistillata  | uncharacterized protein<br>LOC111343921 isoform X2<br>[Stylophora pistillata] | GCF_002571385.1 | TRADDN-DEDD2              |
| XP_022806855.1 | HEPN+TRADDN-DEDD2+ZU5+ZU5+UPA+Death                                          | 1129 | LOC111343921         | cnidaria | Stylophora pistillata  | uncharacterized protein<br>LOC111343921 isoform X3<br>[Stylophora pistillata] | GCF_002571385.1 | TRADDN-DEDD2              |
| PFX21943.1     | Ig+TM+TM+TRADDN-DEDD2+Death                                                  | 2620 | HMCN2                | cnidaria | Stylophora pistillata  | Hemicentin-2 [Stylophora pistillata]                                          | GCA_002571385.1 | TRADDN-DEDD2              |
| PFX14620.1     | low-complexity+TRADDN-DEDD2+HEPN+Ankyrin                                     | 1215 | AWC38_SpisGene21205  | cnidaria | Stylophora pistillata  | Reticulocyte-binding protein 2-like a<br>[Stylophora pistillata]              | GCA_002571385.1 | TRADDN-DEDD2              |
| PFX12801.1     | LRRs+GT4-GTase+LRRs+GT4-GTase+RVT_1+TRADDN-DEDD2                             | 2516 | mshA                 | cnidaria | Stylophora pistillata  | D-inositol 3-phosphate<br>glycosyltransferase [Stylophora<br>pistillata]      | GCA_002571385.1 | TRADDN-DEDD2              |
| XP_015753893.1 | N-ter+TRADDN-Bac+FAM124                                                      | 433  | LOC107333575         | cnidaria | Acropora digitifera    | PREDICTED: uncharacterized<br>protein LOC107333575 [Acropora<br>digitifera]   | GCF_000222465.1 | TRADDN-Bacterial-<br>like |
| EDO38212.1     | N-ter+TRADDN-Bac+FAM124                                                      | 482  | NEMVEDRAFT_v1g244535 | cnidaria | Nematostella vectensis | predicted protein [Nematostella<br>vectensis]                                 | GCA_000209225.1 | TRADDN-Bacterial-<br>like |
| XP_001630275.1 | N-ter+TRADDN-Bac+FAM124                                                      | 482  | NEMVEDRAFT_v1g244535 | cnidaria | Nematostella vectensis | predicted protein [Nematostella<br>vectensis]                                 | GCF_000209225.1 | TRADDN-Bacterial-<br>like |
| XP_020612279.1 | N-ter+TRADDN-Bac+FAM124                                                      | 406  | LOC110050703         | cnidaria | Orbicella faveolata    | uncharacterized protein<br>LOC110050703 [Orbicella faveolata]                 | GCF_002042975.1 | TRADDN-Bacterial-<br>like |
| XP_022780971.1 | N-ter+TRADDN-Bac+FAM124                                                      | 433  | LOC111322172         | cnidaria | Stylophora pistillata  | uncharacterized protein<br>LOC111322172 [Stylophora<br>pistillata]            | GCF_002571385.1 | TRADDN-Bacterial-<br>like |
| PFX28323.1     | Peptidase_A17+TRADDN-DEDD2+Death+Death+ZU5+ZU5+UPA+Death                     | 2079 | AWC38_SpisGene6919   | cnidaria | Stylophora pistillata  | hypothetical protein<br>AWC38_SpisGene6919 [Stylophora<br>pistillata]         | GCA_002571385.1 | TRADDN-DEDD2              |
| PFX26308.1     | Peptidase_C48+PHD+DED+DED+TRADDN-DEDD2+Coiled-coil+Death+Coiled-coil+domain1 | 1276 | AWC38_SpisGene9039   | cnidaria | Stylophora pistillata  | hypothetical protein<br>AWC38_SpisGene9039 [Stylophora<br>pistillata]         | GCA_002571385.1 | TRADDN-DEDD2              |
| XP_015748670.1 | PNPase+TRADDN-DEDD2                                                          | 447  | LOC107328451         | cnidaria | Acropora digitifera    | PREDICTED: uncharacterized<br>protein LOC107328451 [Acropora<br>digitifera]   | GCF_000222465.1 | TRADDN-DEDD2              |
| XP_015758944.1 | PNPase+TRADDN-DEDD2                                                          | 519  | LOC107338220         | cnidaria | Acropora digitifera    | PREDICTED: uncharacterized<br>protein LOC107338220 [Acropora<br>digitifera]   | GCF_000222465.1 | TRADDN-DEDD2              |
| XP_015762495.1 | PNPase+TRADDN-DEDD2                                                          | 397  | LOC107341564         | cnidaria | Acropora digitifera    | PREDICTED: uncharacterized<br>protein LOC107341564 [Acropora<br>digitifera]   | GCF_000222465.1 | TRADDN-DEDD2              |
| XP_020609267.1 | PNPase+TRADDN-DEDD2                                                          | 518  | LOC110047864         | cnidaria | Orbicella faveolata    | uncharacterized protein<br>LOC110047864 isoform X1<br>[Orbicella faveolata]   | GCF_002042975.1 | TRADDN-DEDD2              |
| XP_020609268.1 | PNPase+TRADDN-DEDD2                                                          | 517  | LOC110047864         | cnidaria | Orbicella faveolata    | uncharacterized protein<br>LOC110047864 isoform X2<br>[Orbicella faveolata]   | GCF_002042975.1 | TRADDN-DEDD2              |
| RMX48369.1     | PNPase+TRADDN-DEDD2                                                          | 284  | pdam_00016310        | cnidaria | Pocillopora damicornis | hypothetical protein<br>pdam_00016310, partial<br>[Pocillopora damicornis]    | GCA_003704095.1 | TRADDN-DEDD2              |

| acc            | architecture                                                    | len  | gen.name            | taxend   | species               | define                                                                           | gca             | clade        |
|----------------|-----------------------------------------------------------------|------|---------------------|----------|-----------------------|----------------------------------------------------------------------------------|-----------------|--------------|
| XP_022806002.1 | PNPase+TRADDN-DEDD2+STAND+wHTH+helical-repeat+LRRs              | 1382 | LOC111343123        | cnidaria | Stylophora pistillata | uncharacterized protein LOC111343123, partial [Stylophora pistillata]            | GCF_002571385.1 | TRADDN-DEDD2 |
| XP_015770836.1 | PNPase+TRADDN-DEDD2+STAND+wHTH+LRRs                             | 1754 | LOC107349236        | cnidaria | Acropora digitifera   | PREDICTED: uncharacterized protein LOC107349236 isoform X1 [Acropora digitifera] | GCF_000222465.1 | TRADDN-DEDD2 |
| XP_015770837.1 | PNPase+TRADDN-DEDD2+STAND+wHTH+LRRs                             | 1691 | LOC107349236        | cnidaria | Acropora digitifera   | PREDICTED: uncharacterized protein LOC107349236 isoform X2 [Acropora digitifera] | GCF_000222465.1 | TRADDN-DEDD2 |
| XP_015774318.1 | PNPase+TRADDN-DEDD2+TPRs+ZU5+ZU5+Glycosyl_transferase           | 1563 | LOC107352503        | cnidaria | Acropora digitifera   | PREDICTED: uncharacterized protein LOC107352503 [Acropora digitifera]            | GCF_000222465.1 | TRADDN-DEDD2 |
| PFX12282.1     | RVT_1+TPRs+HEPN+TRADDN-DEDD2                                    | 861  | Ttc28               | cnidaria | Stylophora pistillata | Tetratricopeptide repeat protein 28, partial [Stylophora pistillata]             | GCA_002571385.1 | TRADDN-DEDD2 |
| PFX11418.1     | RVT_1+TRADDN-DEDD2                                              | 230  | TY3B-I              | cnidaria | Stylophora pistillata | Transposon Ty3-1 Gag-Pol polyprotein [Stylophora pistillata]                     | GCA_002571385.1 | TRADDN-DEDD2 |
| XP_022778213.1 | RVT_1+TRADDN-DEDD2                                              | 263  | LOC111319737        | cnidaria | Stylophora pistillata | uncharacterized protein LOC111319737, partial [Stylophora pistillata]            | GCF_002571385.1 | TRADDN-DEDD2 |
| XP_022810423.1 | RVT_1+TRADDN-DEDD2                                              | 448  | LOC111347442        | cnidaria | Stylophora pistillata | uncharacterized protein LOC111347442 [Stylophora pistillata]                     | GCF_002571385.1 | TRADDN-DEDD2 |
| PFX12330.1     | RVT_1+TRADDN-DEDD2+helical-region+STAND+DED+wHTH+helical-region | 1264 | AWC38_SpisGene23734 | cnidaria | Stylophora pistillata | hypothetical protein AWC38_SpisGene23734 [Stylophora pistillata]                 | GCA_002571385.1 | TRADDN-DEDD2 |
| PFX32742.1     | RVT_1+TRADDN-DEDD2+TRADDN-DEDD2+Beta-propeller                  | 873  | trim71              | cnidaria | Stylophora pistillata | E3 ubiquitin-protein ligase TRIM71 [Stylophora pistillata]                       | GCA_002571385.1 | TRADDN-DEDD2 |
| PFX12799.1     | STAND+TPRs+TRADDN-DEDD2+APGTPase+COR+LRRs                       | 2176 | Nrx-IV              | cnidaria | Stylophora pistillata | Neurexin-4 [Stylophora pistillata]                                               | GCA_002571385.1 | TRADDN-DEDD2 |
| XP_015780420.1 | STAND+TRADDN-DEDD2+TRADDN-DEDD2+LRRs                            | 720  | LOC107358323        | cnidaria | Acropora digitifera   | PREDICTED: uncharacterized protein LOC107358323 [Acropora digitifera]            | GCF_000222465.1 | TRADDN-DEDD2 |
| XP_022784672.1 | THAP+GT4-GTase+TRADDN-DEDD2+TRADDN-DEDD2+PH+GT4-GTase           | 1075 | LOC111325184        | cnidaria | Stylophora pistillata | uncharacterized protein LOC111325184 [Stylophora pistillata]                     | GCF_002571385.1 | TRADDN-DEDD2 |
| XP_015751850.1 | TM+TM+TRADDN-DEDD2+TM+TM                                        | 970  | LOC107331748        | cnidaria | Acropora digitifera   | PREDICTED: uncharacterized protein LOC107331748 isoform X1 [Acropora digitifera] | GCF_000222465.1 | TRADDN-DEDD2 |
| XP_015751851.1 | TM+TM+TRADDN-DEDD2+TM+TM                                        | 969  | LOC107331748        | cnidaria | Acropora digitifera   | PREDICTED: uncharacterized protein LOC107331748 isoform X2 [Acropora digitifera] | GCF_000222465.1 | TRADDN-DEDD2 |
| XP_015751852.1 | TM+TM+TRADDN-DEDD2+TM+TM                                        | 969  | LOC107331748        | cnidaria | Acropora digitifera   | PREDICTED: uncharacterized protein LOC107331748 isoform X3 [Acropora digitifera] | GCF_000222465.1 | TRADDN-DEDD2 |
| XP_015751853.1 | TM+TM+TRADDN-DEDD2+TM+TM                                        | 968  | LOC107331748        | cnidaria | Acropora digitifera   | PREDICTED: uncharacterized protein LOC107331748 isoform X4 [Acropora digitifera] | GCF_000222465.1 | TRADDN-DEDD2 |
| XP_015751854.1 | TM+TM+TRADDN-DEDD2+TM+TM                                        | 956  | LOC107331748        | cnidaria | Acropora digitifera   | PREDICTED: uncharacterized protein LOC107331748 isoform X5 [Acropora digitifera] | GCF_000222465.1 | TRADDN-DEDD2 |
| XP_015751855.1 | TM+TM+TRADDN-DEDD2+TM+TM                                        | 955  | LOC107331748        | cnidaria | Acropora digitifera   | PREDICTED: uncharacterized protein LOC107331748 isoform X6 [Acropora digitifera] | GCF_000222465.1 | TRADDN-DEDD2 |

| acc            | architecture             | len | gen.name     | taxend   | species             | define                                                                            | gca             | clade        |
|----------------|--------------------------|-----|--------------|----------|---------------------|-----------------------------------------------------------------------------------|-----------------|--------------|
| XP_015751856.1 | TM+TM+TRADDN-DEDD2+TM+TM | 941 | LOC107331748 | cnidaria | Acropora digitifera | PREDICTED: uncharacterized protein LOC107331748 isoform X7 [Acropora digitifera]  | GCF_000222465.1 | TRADDN-DEDD2 |
| XP_015751857.1 | TM+TM+TRADDN-DEDD2+TM+TM | 940 | LOC107331748 | cnidaria | Acropora digitifera | PREDICTED: uncharacterized protein LOC107331748 isoform X8 [Acropora digitifera]  | GCF_000222465.1 | TRADDN-DEDD2 |
| XP_015751859.1 | TM+TM+TRADDN-DEDD2+TM+TM | 937 | LOC107331748 | cnidaria | Acropora digitifera | PREDICTED: uncharacterized protein LOC107331748 isoform X9 [Acropora digitifera]  | GCF_000222465.1 | TRADDN-DEDD2 |
| XP_015751861.1 | TM+TM+TRADDN-DEDD2+TM+TM | 936 | LOC107331748 | cnidaria | Acropora digitifera | PREDICTED: uncharacterized protein LOC107331748 isoform X10 [Acropora digitifera] | GCF_000222465.1 | TRADDN-DEDD2 |
| XP_015751862.1 | TM+TM+TRADDN-DEDD2+TM+TM | 935 | LOC107331748 | cnidaria | Acropora digitifera | PREDICTED: uncharacterized protein LOC107331748 isoform X11 [Acropora digitifera] | GCF_000222465.1 | TRADDN-DEDD2 |
| XP_015748671.1 | TRADDN-DEDD2             | 122 | LOC107328452 | cnidaria | Acropora digitifera | PREDICTED: uncharacterized protein LOC107328452 [Acropora digitifera]             | GCF_000222465.1 | TRADDN-DEDD2 |
| XP_015757833.1 | TRADDN-DEDD2             | 200 | LOC107337233 | cnidaria | Acropora digitifera | PREDICTED: uncharacterized protein LOC107337233 [Acropora digitifera]             | GCF_000222465.1 | TRADDN-DEDD2 |
| XP_015758789.1 | TRADDN-DEDD2             | 331 | LOC107338054 | cnidaria | Acropora digitifera | PREDICTED: uncharacterized protein LOC107338054 [Acropora digitifera]             | GCF_000222465.1 | TRADDN-DEDD2 |
| XP_015762347.1 | TRADDN-DEDD2             | 470 | LOC107341454 | cnidaria | Acropora digitifera | PREDICTED: uncharacterized protein LOC107341454 isoform X1 [Acropora digitifera]  | GCF_000222465.1 | TRADDN-DEDD2 |
| XP_015762348.1 | TRADDN-DEDD2             | 448 | LOC107341454 | cnidaria | Acropora digitifera | PREDICTED: uncharacterized protein LOC107341454 isoform X2 [Acropora digitifera]  | GCF_000222465.1 | TRADDN-DEDD2 |
| XP_015762349.1 | TRADDN-DEDD2             | 412 | LOC107341454 | cnidaria | Acropora digitifera | PREDICTED: uncharacterized protein LOC107341454 isoform X3 [Acropora digitifera]  | GCF_000222465.1 | TRADDN-DEDD2 |
| XP_015762350.1 | TRADDN-DEDD2             | 412 | LOC107341454 | cnidaria | Acropora digitifera | PREDICTED: uncharacterized protein LOC107341454 isoform X4 [Acropora digitifera]  | GCF_000222465.1 | TRADDN-DEDD2 |
| XP_015768941.1 | TRADDN-DEDD2             | 454 | LOC107347503 | cnidaria | Acropora digitifera | PREDICTED: uncharacterized protein LOC107347503 [Acropora digitifera]             | GCF_000222465.1 | TRADDN-DEDD2 |
| XP_015770131.1 | TRADDN-DEDD2             | 144 | LOC107348586 | cnidaria | Acropora digitifera | PREDICTED: uncharacterized protein LOC107348586 isoform X1 [Acropora digitifera]  | GCF_000222465.1 | TRADDN-DEDD2 |
| XP_015778314.1 | TRADDN-DEDD2             | 161 | LOC107356184 | cnidaria | Acropora digitifera | PREDICTED: uncharacterized protein LOC107356184 [Acropora digitifera]             | GCF_000222465.1 | TRADDN-DEDD2 |
| XP_015780424.1 | TRADDN-DEDD2             | 113 | LOC107358328 | cnidaria | Acropora digitifera | PREDICTED: uncharacterized protein LOC107358328 [Acropora digitifera]             | GCF_000222465.1 | TRADDN-DEDD2 |
| XP_015780573.1 | TRADDN-DEDD2             | 196 | LOC107358484 | cnidaria | Acropora digitifera | PREDICTED: uncharacterized protein LOC107358484 [Acropora digitifera]             | GCF_000222465.1 | TRADDN-DEDD2 |

| acc            | architecture | len | gen.name            | taxend   | species                | define                                                                    | gca             | clade        |
|----------------|--------------|-----|---------------------|----------|------------------------|---------------------------------------------------------------------------|-----------------|--------------|
| KXJ16920.1     | TRADDN-DEDD2 | 140 | AC249_AIPGENE264    | cnidaria | Exaiptasia pallida     | hypothetical protein AC249_AIPGENE264 [Exaiptasia pallida]                | GCA_001417965.1 | TRADDN-DEDD2 |
| KXJ16939.1     | TRADDN-DEDD2 | 136 | AC249_AIPGENE269    | cnidaria | Exaiptasia pallida     | hypothetical protein AC249_AIPGENE269 [Exaiptasia pallida]                | GCA_001417965.1 | TRADDN-DEDD2 |
| XP_020610443.1 | TRADDN-DEDD2 | 381 | LOC110049013        | cnidaria | Orbicella faveolata    | uncharacterized protein LOC110049013 [Orbicella faveolata]                | GCF_002042975.1 | TRADDN-DEDD2 |
| XP_020611285.1 | TRADDN-DEDD2 | 214 | LOC110049799        | cnidaria | Orbicella faveolata    | uncharacterized protein LOC110049799 [Orbicella faveolata]                | GCF_002042975.1 | TRADDN-DEDD2 |
| XP_020611286.1 | TRADDN-DEDD2 | 197 | LOC110049801        | cnidaria | Orbicella faveolata    | uncharacterized protein LOC110049801 [Orbicella faveolata]                | GCF_002042975.1 | TRADDN-DEDD2 |
| XP_020611948.1 | TRADDN-DEDD2 | 184 | LOC110050370        | cnidaria | Orbicella faveolata    | uncharacterized protein LOC110050370 [Orbicella faveolata]                | GCF_002042975.1 | TRADDN-DEDD2 |
| XP_020614050.1 | TRADDN-DEDD2 | 399 | LOC110052283        | cnidaria | Orbicella faveolata    | uncharacterized protein LOC110052283 [Orbicella faveolata]                | GCF_002042975.1 | TRADDN-DEDD2 |
| XP_020616566.1 | TRADDN-DEDD2 | 260 | LOC110054561        | cnidaria | Orbicella faveolata    | uncharacterized protein LOC110054561 [Orbicella faveolata]                | GCF_002042975.1 | TRADDN-DEDD2 |
| XP_020616567.1 | TRADDN-DEDD2 | 149 | LOC110054562        | cnidaria | Orbicella faveolata    | uncharacterized protein LOC110054562 [Orbicella faveolata]                | GCF_002042975.1 | TRADDN-DEDD2 |
| XP_020616779.1 | TRADDN-DEDD2 | 186 | LOC110054760        | cnidaria | Orbicella faveolata    | uncharacterized protein LOC110054760 [Orbicella faveolata]                | GCF_002042975.1 | TRADDN-DEDD2 |
| XP_020617426.1 | TRADDN-DEDD2 | 489 | LOC110055381        | cnidaria | Orbicella faveolata    | protein argonaute 12-like isoform X2 [Orbicella faveolata]                | GCF_002042975.1 | TRADDN-DEDD2 |
| XP_020621781.1 | TRADDN-DEDD2 | 203 | LOC110059425        | cnidaria | Orbicella faveolata    | uncharacterized protein LOC110059425 [Orbicella faveolata]                | GCF_002042975.1 | TRADDN-DEDD2 |
| XP_020622242.1 | TRADDN-DEDD2 | 324 | LOC110059859        | cnidaria | Orbicella faveolata    | uncharacterized protein LOC110059859 [Orbicella faveolata]                | GCF_002042975.1 | TRADDN-DEDD2 |
| XP_020629198.1 | TRADDN-DEDD2 | 527 | LOC110066318        | cnidaria | Orbicella faveolata    | uncharacterized protein LOC110066318 [Orbicella faveolata]                | GCF_002042975.1 | TRADDN-DEDD2 |
| RMX57216.1     | TRADDN-DEDD2 | 453 | pdam_00022805       | cnidaria | Pocillopora damicornis | hypothetical protein pdam_00022805 [Pocillopora damicornis]               | GCA_003704095.1 | TRADDN-DEDD2 |
| RMX57324.1     | TRADDN-DEDD2 | 173 | pdam_00021312       | cnidaria | Pocillopora damicornis | hypothetical protein pdam_00021312, partial [Pocillopora damicornis]      | GCA_003704095.1 | TRADDN-DEDD2 |
| PFX11085.1     | TRADDN-DEDD2 | 196 | AWC38_SpisGene25448 | cnidaria | Stylophora pistillata  | hypothetical protein AWC38_SpisGene25448, partial [Stylophora pistillata] | GCA_002571385.1 | TRADDN-DEDD2 |
| PFX13352.1     | TRADDN-DEDD2 | 314 | AWC38_SpisGene22565 | cnidaria | Stylophora pistillata  | hypothetical protein AWC38_SpisGene22565 [Stylophora pistillata]          | GCA_002571385.1 | TRADDN-DEDD2 |
| PFX14439.1     | TRADDN-DEDD2 | 162 | AWC38_SpisGene21405 | cnidaria | Stylophora pistillata  | hypothetical protein AWC38_SpisGene21405 [Stylophora pistillata]          | GCA_002571385.1 | TRADDN-DEDD2 |
| XP_022777983.1 | TRADDN-DEDD2 | 149 | LOC111319487        | cnidaria | Stylophora pistillata  | uncharacterized protein LOC111319487 [Stylophora pistillata]              | GCF_002571385.1 | TRADDN-DEDD2 |
| XP_022778046.1 | TRADDN-DEDD2 | 400 | LOC111319566        | cnidaria | Stylophora pistillata  | uncharacterized protein LOC111319566, partial [Stylophora pistillata]     | GCF_002571385.1 | TRADDN-DEDD2 |

| acc            | architecture         | len  | gen.name     | taxend   | species               | define                                                                        | gca             | clade        |
|----------------|----------------------|------|--------------|----------|-----------------------|-------------------------------------------------------------------------------|-----------------|--------------|
| XP_022778193.1 | TRADDN-DEDD2         | 237  | LOC111319717 | cnidaria | Stylophora pistillata | uncharacterized protein<br>LOC111319717 [Stylophora<br>pistillata]            | GCF_002571385.1 | TRADDN-DEDD2 |
| XP_022793788.1 | TRADDN-DEDD2         | 167  | LOC111332659 | cnidaria | Stylophora pistillata | uncharacterized protein<br>LOC111332659 [Stylophora<br>pistillata]            | GCF_002571385.1 | TRADDN-DEDD2 |
| XP_022800160.1 | TRADDN-DEDD2         | 169  | LOC111338019 | cnidaria | Stylophora pistillata | uncharacterized protein<br>LOC111338019 [Stylophora<br>pistillata]            | GCF_002571385.1 | TRADDN-DEDD2 |
| XP_022802996.1 | TRADDN-DEDD2         | 156  | LOC111340412 | cnidaria | Stylophora pistillata | uncharacterized protein<br>LOC111340412 [Stylophora<br>pistillata]            | GCF_002571385.1 | TRADDN-DEDD2 |
| XP_022806342.1 | TRADDN-DEDD2         | 245  | LOC111343432 | cnidaria | Stylophora pistillata | uncharacterized protein<br>LOC111343432 [Stylophora<br>pistillata]            | GCF_002571385.1 | TRADDN-DEDD2 |
| XP_022806344.1 | TRADDN-DEDD2         | 231  | LOC111343434 | cnidaria | Stylophora pistillata | uncharacterized protein<br>LOC111343434 [Stylophora<br>pistillata]            | GCF_002571385.1 | TRADDN-DEDD2 |
| XP_022806851.1 | TRADDN-DEDD2         | 393  | LOC111343917 | cnidaria | Stylophora pistillata | uncharacterized protein<br>LOC111343917 [Stylophora<br>pistillata]            | GCF_002571385.1 | TRADDN-DEDD2 |
| XP_022809194.1 | TRADDN-DEDD2         | 124  | LOC111346152 | cnidaria | Stylophora pistillata | uncharacterized protein<br>LOC111346152 [Stylophora<br>pistillata]            | GCF_002571385.1 | TRADDN-DEDD2 |
| XP_022809576.1 | TRADDN-DEDD2         | 264  | LOC111346561 | cnidaria | Stylophora pistillata | uncharacterized protein<br>LOC111346561 [Stylophora<br>pistillata]            | GCF_002571385.1 | TRADDN-DEDD2 |
| XP_022809800.1 | TRADDN-DEDD2         | 311  | LOC111346799 | cnidaria | Stylophora pistillata | uncharacterized protein<br>LOC111346799 isoform X1<br>[Stylophora pistillata] | GCF_002571385.1 | TRADDN-DEDD2 |
| XP_022809801.1 | TRADDN-DEDD2         | 274  | LOC111346799 | cnidaria | Stylophora pistillata | uncharacterized protein<br>LOC111346799 isoform X2<br>[Stylophora pistillata] | GCF_002571385.1 | TRADDN-DEDD2 |
| XP_022810532.1 | TRADDN-DEDD2         | 258  | LOC111347564 | cnidaria | Stylophora pistillata | uncharacterized protein<br>LOC111347564 [Stylophora<br>pistillata]            | GCF_002571385.1 | TRADDN-DEDD2 |
| XP_015754290.1 | TRADDN-DEDD2+Ankyrin | 953  | LOC107333937 | cnidaria | Acropora digitifera   | PREDICTED: ankyrin-3-like<br>isoform X1 [Acropora digitifera]                 | GCF_000222465.1 | TRADDN-DEDD2 |
| XP_015754291.1 | TRADDN-DEDD2+Ankyrin | 928  | LOC107333937 | cnidaria | Acropora digitifera   | PREDICTED: ankyrin-3-like<br>isoform X2 [Acropora digitifera]                 | GCF_000222465.1 | TRADDN-DEDD2 |
| XP_015768945.1 | TRADDN-DEDD2+Ankyrin | 763  | LOC107347506 | cnidaria | Acropora digitifera   | PREDICTED: ankyrin-1-like<br>[Acropora digitifera]                            | GCF_000222465.1 | TRADDN-DEDD2 |
| XP_015768950.1 | TRADDN-DEDD2+Ankyrin | 915  | LOC107347512 | cnidaria | Acropora digitifera   | PREDICTED: ankyrin-3-like<br>isoform X1 [Acropora digitifera]                 | GCF_000222465.1 | TRADDN-DEDD2 |
| XP_015768951.1 | TRADDN-DEDD2+Ankyrin | 911  | LOC107347512 | cnidaria | Acropora digitifera   | PREDICTED: ankyrin-3-like<br>isoform X2 [Acropora digitifera]                 | GCF_000222465.1 | TRADDN-DEDD2 |
| XP_015768952.1 | TRADDN-DEDD2+Ankyrin | 898  | LOC107347512 | cnidaria | Acropora digitifera   | PREDICTED: ankyrin-3-like<br>isoform X3 [Acropora digitifera]                 | GCF_000222465.1 | TRADDN-DEDD2 |
| XP_015772599.1 | TRADDN-DEDD2+Ankyrin | 1350 | LOC107350870 | cnidaria | Acropora digitifera   | PREDICTED: ankyrin-3-like<br>isoform X1 [Acropora digitifera]                 | GCF_000222465.1 | TRADDN-DEDD2 |
| XP_015772601.1 | TRADDN-DEDD2+Ankyrin | 1350 | LOC107350870 | cnidaria | Acropora digitifera   | PREDICTED: ankyrin-1-like<br>isoform X2 [Acropora digitifera]                 | GCF_000222465.1 | TRADDN-DEDD2 |

| acc            | architecture                                       | len | gen.name            | taxend   | species               | define                                                                                                                       | gca             | clade        |
|----------------|----------------------------------------------------|-----|---------------------|----------|-----------------------|------------------------------------------------------------------------------------------------------------------------------|-----------------|--------------|
| XP_015778948.1 | TRADDN-DEDD2+Ankyrin                               | 628 | LOC107356839        | cnidaria | Acropora digitifera   | PREDICTED:<br>serine/threonine-protein<br>phosphatase 6 regulatory ankyrin<br>repeat subunit A-like [Acropora<br>digitifera] | GCF_000222465.1 | TRADDN-DEDD2 |
| KXJ06959.1     | TRADDN-DEDD2+Ankyrin                               | 674 | AC249_AIPGENE2190   | cnidaria | Exaiptasia pallida    | putative ankyrin repeat protein<br>MM-0045, partial [Exaiptasia<br>pallida]                                                  | GCA_001417965.1 | TRADDN-DEDD2 |
| XP_020902162.1 | TRADDN-DEDD2+Ankyrin                               | 780 | LOC110240688        | cnidaria | Exaiptasia pallida    | uncharacterized protein<br>LOC110240688 [Exaiptasia pallida]                                                                 | -               | TRADDN-DEDD2 |
| XP_020914387.1 | TRADDN-DEDD2+Ankyrin                               | 637 | LOC110251974        | cnidaria | Exaiptasia pallida    | serine/threonine-protein<br>phosphatase 6 regulatory ankyrin<br>repeat subunit C-like [Exaiptasia<br>pallida]                | GCF_001417965.1 | TRADDN-DEDD2 |
| XP_020915956.1 | TRADDN-DEDD2+Ankyrin                               | 854 | LOC110253397        | cnidaria | Exaiptasia pallida    | serine/threonine-protein<br>phosphatase 6 regulatory ankyrin<br>repeat subunit A-like [Exaiptasia<br>pallida]                | -               | TRADDN-DEDD2 |
| PFX21728.1     | TRADDN-DEDD2+Ankyrin                               | 755 | Ankyrin3            | cnidaria | Stylophora pistillata | Ankyrin-3 [Stylophora pistillata]                                                                                            | GCA_002571385.1 | TRADDN-DEDD2 |
| XP_022796757.1 | TRADDN-DEDD2+Ankyrin                               | 863 | LOC111335162        | cnidaria | Stylophora pistillata | uncharacterized protein<br>LOC111335162 isoform X1<br>[Stylophora pistillata]                                                | GCF_002571385.1 | TRADDN-DEDD2 |
| XP_022796758.1 | TRADDN-DEDD2+Ankyrin                               | 855 | LOC111335162        | cnidaria | Stylophora pistillata | uncharacterized protein<br>LOC111335162 isoform X2<br>[Stylophora pistillata]                                                | GCF_002571385.1 | TRADDN-DEDD2 |
| XP_022796759.1 | TRADDN-DEDD2+Ankyrin                               | 612 | LOC111335162        | cnidaria | Stylophora pistillata | ankyrin-3-like isoform X3<br>[Stylophora pistillata]                                                                         | GCF_002571385.1 | TRADDN-DEDD2 |
| PFX19726.1     | TRADDN-DEDD2+Beta-propeller                        | 364 | brat                | cnidaria | Stylophora pistillata | Brain tumor protein [Stylophora<br>pistillata]                                                                               | GCA_002571385.1 | TRADDN-DEDD2 |
| XP_022777971.1 | TRADDN-DEDD2+Beta-propeller                        | 563 | LOC111319469        | cnidaria | Stylophora pistillata | E3 ubiquitin-protein ligase<br>TRIM71-like [Stylophora pistillata]                                                           | GCF_002571385.1 | TRADDN-DEDD2 |
| XP_022778089.1 | TRADDN-DEDD2+Beta-propeller                        | 380 | LOC111319603        | cnidaria | Stylophora pistillata | E3 ubiquitin-protein ligase<br>TRIM71-like [Stylophora pistillata]                                                           | GCF_002571385.1 | TRADDN-DEDD2 |
| XP_020622142.1 | TRADDN-DEDD2+CARD                                  | 365 | LOC110059758        | cnidaria | Orbicella faveolata   | uncharacterized protein<br>LOC110059758 isoform X3<br>[Orbicella faveolata]                                                  | GCF_002042975.1 | TRADDN-DEDD2 |
| KXJ07117.1     | TRADDN-DEDD2+Coiled-coil                           | 840 | AC249_AIPGENE15613  | cnidaria | Exaiptasia pallida    | hypothetical protein<br>AC249_AIPGENE15613 [Exaiptasia<br>pallida]                                                           | GCA_001417965.1 | TRADDN-DEDD2 |
| XP_020913810.1 | TRADDN-DEDD2+Coiled-coil                           | 364 | LOC110251434        | cnidaria | Exaiptasia pallida    | uncharacterized protein<br>LOC110251434, partial [Exaiptasia<br>pallida]                                                     | -               | TRADDN-DEDD2 |
| XP_022796410.1 | TRADDN-DEDD2+Coiled-coil+Death                     | 477 | LOC111334859        | cnidaria | Stylophora pistillata | uncharacterized protein<br>LOC111334859 [Stylophora<br>pistillata]                                                           | GCF_002571385.1 | TRADDN-DEDD2 |
| PFX16518.1     | TRADDN-DEDD2+Coiled-coil+Death+Coiled-coil+domain1 | 728 | AWC38_SpisGene19208 | cnidaria | Stylophora pistillata | hypothetical protein<br>AWC38_SpisGene19208 [Stylophora<br>pistillata]                                                       | GCA_002571385.1 | TRADDN-DEDD2 |
| XP_022800990.1 | TRADDN-DEDD2+Coiled-coil+TPRs                      | 639 | LOC111338702        | cnidaria | Stylophora pistillata | uncharacterized protein<br>LOC111338702 [Stylophora<br>pistillata]                                                           | GCF_002571385.1 | TRADDN-DEDD2 |

| acc            | architecture                                         | len  | gen.name             | taxend   | species                | define                                                                           | gca             | clade        |
|----------------|------------------------------------------------------|------|----------------------|----------|------------------------|----------------------------------------------------------------------------------|-----------------|--------------|
| KXJ06752.1     | TRADDN-DEDD2+Coiled-coil+TRADDN-DEDD2+Coiled-coil+TM | 1695 | AC249_AIPGENE24613   | cnidaria | Exaiptasia pallida     | hypothetical protein AC249_AIPGENE24613, partial [Exaiptasia pallida]            | GCA_001417965.1 | TRADDN-DEDD2 |
| PFX14013.1     | TRADDN-DEDD2+Death                                   | 385  | AWC38_SpisGene21870  | cnidaria | Stylophora pistillata  | hypothetical protein AWC38_SpisGene21870 [Stylophora pistillata]                 | GCA_002571385.1 | TRADDN-DEDD2 |
| XP_022791905.1 | TRADDN-DEDD2+Death                                   | 381  | LOC111331120         | cnidaria | Stylophora pistillata  | uncharacterized protein LOC111331120 isoform X4 [Stylophora pistillata]          | GCF_002571385.1 | TRADDN-DEDD2 |
| XP_022808473.1 | TRADDN-DEDD2+Death                                   | 334  | LOC111345454         | cnidaria | Stylophora pistillata  | uncharacterized protein LOC111345454 [Stylophora pistillata]                     | GCF_002571385.1 | TRADDN-DEDD2 |
| XP_015757179.1 | TRADDN-DEDD2+Death+APGTPase+COR+Death+Death          | 1313 | LOC107336623         | cnidaria | Acropora digitifera    | PREDICTED: uncharacterized protein LOC107336623 isoform X1 [Acropora digitifera] | GCF_000222465.1 | TRADDN-DEDD2 |
| XP_015757180.1 | TRADDN-DEDD2+Death+APGTPase+COR+Death+Death          | 1306 | LOC107336623         | cnidaria | Acropora digitifera    | PREDICTED: uncharacterized protein LOC107336623 isoform X2 [Acropora digitifera] | GCF_000222465.1 | TRADDN-DEDD2 |
| XP_015757182.1 | TRADDN-DEDD2+Death+APGTPase+COR+Death+Death          | 1284 | LOC107336623         | cnidaria | Acropora digitifera    | PREDICTED: uncharacterized protein LOC107336623 isoform X3 [Acropora digitifera] | GCF_000222465.1 | TRADDN-DEDD2 |
| XP_015757183.1 | TRADDN-DEDD2+Death+APGTPase+COR+Death+Death          | 1257 | LOC107336623         | cnidaria | Acropora digitifera    | PREDICTED: uncharacterized protein LOC107336623 isoform X4 [Acropora digitifera] | GCF_000222465.1 | TRADDN-DEDD2 |
| XP_015763307.1 | TRADDN-DEDD2+Death+Coiled-coil+domain1               | 534  | LOC107342338         | cnidaria | Acropora digitifera    | PREDICTED: uncharacterized protein LOC107342338 [Acropora digitifera]            | GCF_000222465.1 | TRADDN-DEDD2 |
| XP_015769816.1 | TRADDN-DEDD2+Death+Coiled-coil+domain1               | 599  | LOC107348306         | cnidaria | Acropora digitifera    | PREDICTED: uncharacterized protein LOC107348306 [Acropora digitifera]            | GCF_000222465.1 | TRADDN-DEDD2 |
| PFX24827.1     | TRADDN-DEDD2+Death+Death                             | 471  | AWC38_SpisGene10551  | cnidaria | Stylophora pistillata  | hypothetical protein AWC38_SpisGene10551 [Stylophora pistillata]                 | GCA_002571385.1 | TRADDN-DEDD2 |
| XP_020604807.1 | TRADDN-DEDD2+EF-hand+SH2                             | 458  | LOC110043668         | cnidaria | Orbicella faveolata    | uncharacterized protein LOC110043668 isoform X3 [Orbicella faveolata]            | GCF_002042975.1 | TRADDN-DEDD2 |
| XP_001622298.1 | TRADDN-DEDD2+Exo_endo_phos                           | 330  | NEMVEDRAFT_v1g220915 | cnidaria | Nematostella vectensis | predicted protein [Nematostella vectensis]                                       | GCF_000209225.1 | TRADDN-DEDD2 |
| PFX31376.1     | TRADDN-DEDD2+GBP                                     | 343  | GBP7                 | cnidaria | Stylophora pistillata  | Guanylate-binding protein 7 [Stylophora pistillata]                              | GCA_002571385.1 | TRADDN-DEDD2 |
| XP_015748075.1 | TRADDN-DEDD2+GT4-GTase                               | 636  | LOC107327853         | cnidaria | Acropora digitifera    | PREDICTED: uncharacterized protein LOC107327853 [Acropora digitifera]            | GCF_000222465.1 | TRADDN-DEDD2 |
| PFX28928.1     | TRADDN-DEDD2+GT4-GTase+TRADDN-DEDD2                  | 828  | mshA                 | cnidaria | Stylophora pistillata  | D-inositol 3-phosphate glycosyltransferase [Stylophora pistillata]               | GCA_002571385.1 | TRADDN-DEDD2 |
| XP_001621708.1 | TRADDN-DEDD2+helical-repeats                         | 575  | NEMVEDRAFT_v1g221660 | cnidaria | Nematostella vectensis | hypothetical protein NEMVEDRAFT_v1g221660, partial [Nematostella vectensis]      | GCF_000209225.1 | TRADDN-DEDD2 |
| XP_022778682.1 | TRADDN-DEDD2+HEPN                                    | 341  | LOC111320265         | cnidaria | Stylophora pistillata  | uncharacterized protein LOC111320265, partial [Stylophora pistillata]            | GCF_002571385.1 | TRADDN-DEDD2 |



| acc            | architecture                                                                          | len  | gen.name     | taxend   | species               | define                                                                    | gca             | clade        |
|----------------|---------------------------------------------------------------------------------------|------|--------------|----------|-----------------------|---------------------------------------------------------------------------|-----------------|--------------|
| XP_022807529.1 | TRADDN-DEDD2+HEPN+Ankyrin                                                             | 916  | LOC111344551 | cnidaria | Stylophora pistillata | uncharacterized protein LOC111344551 [Stylophora pistillata]              | GCF_002571385.1 | TRADDN-DEDD2 |
| XP_015753922.1 | TRADDN-DEDD2+HEPN+STAND                                                               | 413  | LOC107333606 | cnidaria | Acropora digitifera   | PREDICTED: uncharacterized protein LOC107333606 [Acropora digitifera]     | GCF_000222465.1 | TRADDN-DEDD2 |
| XP_015769096.1 | TRADDN-DEDD2+HEPN+STAND+wHTH+helical-region+LRRs+RVT_1                                | 975  | LOC107347651 | cnidaria | Acropora digitifera   | PREDICTED: uncharacterized protein LOC107347651 [Acropora digitifera]     | GCF_000222465.1 | TRADDN-DEDD2 |
| XP_015770794.1 | TRADDN-DEDD2+HSP90-Sacsin                                                             | 661  | LOC107349202 | cnidaria | Acropora digitifera   | PREDICTED: sacin-like [Acropora digitifera]                               | GCF_000222465.1 | TRADDN-DEDD2 |
| XP_022789410.1 | TRADDN-DEDD2+HSP90-Sacsin                                                             | 720  | LOC111329073 | cnidaria | Stylophora pistillata | sacin-like [Stylophora pistillata]                                        | GCF_002571385.1 | TRADDN-DEDD2 |
| XP_022808646.1 | TRADDN-DEDD2+HSP90-Sacsin+DUF3684+HSP90-Sacsin+DUF3684+HSP90-Sacsin+DUF3684+DnaJ+HEPN | 4675 | LOC111345629 | cnidaria | Stylophora pistillata | sacin-like [Stylophora pistillata]                                        | GCF_002571385.1 | TRADDN-DEDD2 |
| XP_020604502.1 | TRADDN-DEDD2+HTH                                                                      | 305  | LOC110043387 | cnidaria | Orbicella faveolata   | uncharacterized protein LOC110043387 [Orbicella faveolata]                | GCF_002042975.1 | TRADDN-DEDD2 |
| XP_020622210.1 | TRADDN-DEDD2+LRRs                                                                     | 875  | LOC110059824 | cnidaria | Orbicella faveolata   | neurofilament heavy polypeptide-like [Orbicella faveolata]                | GCF_002042975.1 | TRADDN-DEDD2 |
| XP_020622238.1 | TRADDN-DEDD2+LRRs                                                                     | 1040 | LOC110059854 | cnidaria | Orbicella faveolata   | uncharacterized protein LOC110059854 isoform X1 [Orbicella faveolata]     | GCF_002042975.1 | TRADDN-DEDD2 |
| XP_020622239.1 | TRADDN-DEDD2+LRRs                                                                     | 1018 | LOC110059854 | cnidaria | Orbicella faveolata   | uncharacterized protein LOC110059854 isoform X2 [Orbicella faveolata]     | GCF_002042975.1 | TRADDN-DEDD2 |
| XP_020617793.1 | TRADDN-DEDD2+RRM+RRM+KH+KH+KH+KH+KH+KH+KH++Macro+Macro+Macro+WWE                      | 1593 | LOC110055733 | cnidaria | Orbicella faveolata   | poly [ADP-ribose] polymerase 14-like [Orbicella faveolata]                | GCF_002042975.1 | TRADDN-DEDD2 |
| XP_015766538.1 | TRADDN-DEDD2+RRM+RRM+RING+BBOX+BBOX+Coiled-coil                                       | 754  | LOC107345350 | cnidaria | Acropora digitifera   | PREDICTED: uncharacterized protein LOC107345350 [Acropora digitifera]     | GCF_000222465.1 | TRADDN-DEDD2 |
| XP_015777040.1 | TRADDN-DEDD2+RRM+RRM+RING+BBOX+Coiled-coil+Filamin+Beta-propeller                     | 1262 | LOC107355040 | cnidaria | Acropora digitifera   | PREDICTED: E3 ubiquitin-protein ligase TRIM71-like [Acropora digitifera]  | GCF_000222465.1 | TRADDN-DEDD2 |
| PFX15770.1     | TRADDN-DEDD2+STAND+wHTH+helical-region+LRRs                                           | 1149 | Nlrc5        | cnidaria | Stylophora pistillata | Protein NLRC5, partial [Stylophora pistillata]                            | GCA_002571385.1 | TRADDN-DEDD2 |
| XP_015754763.1 | TRADDN-DEDD2+STAND+wHTH+helical-repeat+LRRs                                           | 1363 | LOC107334347 | cnidaria | Acropora digitifera   | PREDICTED: uncharacterized protein LOC107334347 [Acropora digitifera]     | GCF_000222465.1 | TRADDN-DEDD2 |
| XP_022797605.1 | TRADDN-DEDD2+Thioredoxin+PITH                                                         | 547  | LOC111335871 | cnidaria | Stylophora pistillata | uncharacterized protein LOC111335871 [Stylophora pistillata]              | GCF_002571385.1 | TRADDN-DEDD2 |
| XP_022810296.1 | TRADDN-DEDD2+TM                                                                       | 380  | LOC111347305 | cnidaria | Stylophora pistillata | uncharacterized protein LOC111347305 [Stylophora pistillata]              | GCF_002571385.1 | TRADDN-DEDD2 |
| XP_015761223.1 | TRADDN-DEDD2+TM+TM+TM                                                                 | 553  | LOC107340384 | cnidaria | Acropora digitifera   | PREDICTED: uncharacterized protein LOC107340384 [Acropora digitifera]     | GCF_000222465.1 | TRADDN-DEDD2 |
| XP_015749629.1 | TRADDN-DEDD2+TPRs                                                                     | 382  | LOC107329456 | cnidaria | Acropora digitifera   | PREDICTED: uncharacterized protein LOC107329456 [Acropora digitifera]     | GCF_000222465.1 | TRADDN-DEDD2 |
| XP_015760874.1 | TRADDN-DEDD2+TPRs                                                                     | 263  | LOC107340046 | cnidaria | Acropora digitifera   | PREDICTED: tetratricopeptide repeat protein 28-like [Acropora digitifera] | GCF_000222465.1 | TRADDN-DEDD2 |

| acc            | architecture                                                               | len  | gen.name      | taxend   | species                | define                                                                           | gca             | clade        |
|----------------|----------------------------------------------------------------------------|------|---------------|----------|------------------------|----------------------------------------------------------------------------------|-----------------|--------------|
| XP_020619807.1 | TRADDN-DEDD2+TPRs                                                          | 537  | LOC110057557  | cnidaria | Orbicella faveolata    | nephrocystin-3-like [Orbicella faveolata]                                        | GCF_002042975.1 | TRADDN-DEDD2 |
| XP_020619855.1 | TRADDN-DEDD2+TPRs                                                          | 598  | LOC110057601  | cnidaria | Orbicella faveolata    | kinesin light chain 3-like isoform X3 [Orbicella faveolata]                      | GCF_002042975.1 | TRADDN-DEDD2 |
| XP_022800308.1 | TRADDN-DEDD2+TPRs                                                          | 974  | LOC111338144  | cnidaria | Stylophora pistillata  | tetratricopeptide repeat protein 28-like [Stylophora pistillata]                 | GCF_002571385.1 | TRADDN-DEDD2 |
| PFX35021.1     | TRADDN-DEDD2+TPRs+STAND+TPRs                                               | 1567 | Klc2          | cnidaria | Stylophora pistillata  | Kinesin light chain 2 [Stylophora pistillata]                                    | GCA_002571385.1 | TRADDN-DEDD2 |
| XP_015749168.1 | TRADDN-DEDD2+TRADDN-DEDD2                                                  | 474  | LOC107328948  | cnidaria | Acropora digitifera    | PREDICTED: uncharacterized protein LOC107328948 [Acropora digitifera]            | GCF_000222465.1 | TRADDN-DEDD2 |
| XP_020622259.1 | TRADDN-DEDD2+TRADDN-DEDD2                                                  | 569  | LOC110059882  | cnidaria | Orbicella faveolata    | uncharacterized protein DDB_G0286299-like isoform X1 [Orbicella faveolata]       | GCF_002042975.1 | TRADDN-DEDD2 |
| XP_020622260.1 | TRADDN-DEDD2+TRADDN-DEDD2                                                  | 569  | LOC110059882  | cnidaria | Orbicella faveolata    | uncharacterized protein DDB_G0286299-like isoform X2 [Orbicella faveolata]       | GCF_002042975.1 | TRADDN-DEDD2 |
| XP_020628009.1 | TRADDN-DEDD2+TRADDN-DEDD2                                                  | 290  | LOC110065241  | cnidaria | Orbicella faveolata    | uncharacterized protein LOC110065241 isoform X1 [Orbicella faveolata]            | GCF_002042975.1 | TRADDN-DEDD2 |
| XP_020628010.1 | TRADDN-DEDD2+TRADDN-DEDD2                                                  | 289  | LOC110065241  | cnidaria | Orbicella faveolata    | uncharacterized protein LOC110065241 isoform X2 [Orbicella faveolata]            | GCF_002042975.1 | TRADDN-DEDD2 |
| XP_015765569.1 | TRADDN-DEDD2+TRADDN-DEDD2+Ankyrin                                          | 683  | LOC107344436  | cnidaria | Acropora digitifera    | PREDICTED: uncharacterized protein LOC107344436, partial [Acropora digitifera]   | GCF_000222465.1 | TRADDN-DEDD2 |
| RMX58800.1     | TRADDN-DEDD2+TRADDN-DEDD2+Filamin+TRADDN-DEDD2+TRADDN-DEDD2+Beta-propeller | 929  | pdam_00021877 | cnidaria | Pocillopora damicornis | hypothetical protein pdam_00021877 [Pocillopora damicornis]                      | GCA_003704095.1 | TRADDN-DEDD2 |
| XP_022809254.1 | TRADDN-DEDD2+TRADDN-DEDD2+Filamin+TRADDN-DEDD2+TRADDN-DEDD2+Beta-propeller | 820  | LOC111346217  | cnidaria | Stylophora pistillata  | tripartite motif-containing protein 2-like [Stylophora pistillata]               | GCF_002571385.1 | TRADDN-DEDD2 |
| XP_015760896.1 | TRADDN-DEDD2+TRADDN-DEDD2+GT4-GTase                                        | 652  | LOC107340068  | cnidaria | Acropora digitifera    | PREDICTED: uncharacterized protein LOC107340068 isoform X1 [Acropora digitifera] | GCF_000222465.1 | TRADDN-DEDD2 |
| XP_015760897.1 | TRADDN-DEDD2+TRADDN-DEDD2+GT4-GTase                                        | 651  | LOC107340068  | cnidaria | Acropora digitifera    | PREDICTED: uncharacterized protein LOC107340068 isoform X2 [Acropora digitifera] | GCF_000222465.1 | TRADDN-DEDD2 |
| XP_020622197.1 | TRADDN-DEDD2+TRADDN-DEDD2+LRRs                                             | 1040 | LOC110059814  | cnidaria | Orbicella faveolata    | uncharacterized protein LOC110059814 isoform X1 [Orbicella faveolata]            | GCF_002042975.1 | TRADDN-DEDD2 |
| XP_020622198.1 | TRADDN-DEDD2+TRADDN-DEDD2+LRRs                                             | 1037 | LOC110059814  | cnidaria | Orbicella faveolata    | uncharacterized protein LOC110059814 isoform X2 [Orbicella faveolata]            | GCF_002042975.1 | TRADDN-DEDD2 |
| PFX32737.1     | TRADDN-DEDD2+TRADDN-DEDD2+TRADDN-DEDD2+Filamin+Beta-propeller              | 646  | trim71        | cnidaria | Stylophora pistillata  | E3 ubiquitin-protein ligase TRIM71 [Stylophora pistillata]                       | GCA_002571385.1 | TRADDN-DEDD2 |
| PFX32741.1     | TRADDN-DEDD2+TRADDN-DEDD2+TRADDN-DEDD2+Filamin+Beta-propeller              | 931  | Trim71        | cnidaria | Stylophora pistillata  | E3 ubiquitin-protein ligase TRIM71 [Stylophora pistillata]                       | GCA_002571385.1 | TRADDN-DEDD2 |
| XP_022800589.1 | TRADDN-DEDD2+UBI+UBI+UBI                                                   | 494  | LOC111338372  | cnidaria | Stylophora pistillata  | uncharacterized protein LOC111338372 [Stylophora pistillata]                     | GCF_002571385.1 | TRADDN-DEDD2 |
| PFX19320.1     | TRADDN-DEDD2+UBI+UBI+UBI+UBI                                               | 1030 | UBC           | cnidaria | Stylophora pistillata  | Polyubiquitin-C [Stylophora pistillata]                                          | GCA_002571385.1 | TRADDN-DEDD2 |

| acc            | architecture                                                  | len  | gen.name             | taxend        | species                       | define                                                                                                          | gca             | clade        |
|----------------|---------------------------------------------------------------|------|----------------------|---------------|-------------------------------|-----------------------------------------------------------------------------------------------------------------|-----------------|--------------|
| PFX23674.1     | TRADDN-DEDD2+vWA+Dynamin-like_sGTPase+helical-region          | 1654 | AWC38_SpisGene11766  | cnidaria      | Stylophora pistillata         | hypothetical protein AWC38_SpisGene11766 [Stylophora pistillata]                                                | GCA_002571385.1 | TRADDN-DEDD2 |
| XP_022790559.1 | TRADDN-DEDD2+zf-C2H2                                          | 428  | LOC111330036         | cnidaria      | Stylophora pistillata         | uncharacterized protein LOC111330036 [Stylophora pistillata]                                                    | GCF_002571385.1 | TRADDN-DEDD2 |
| XP_022803161.1 | TRADDN-DEDD2+ZU5+ZU5+UPA+Death                                | 791  | LOC111340569         | cnidaria      | Stylophora pistillata         | uncharacterized protein LOC111340569 isoform X2 [Stylophora pistillata]                                         | GCF_002571385.1 | TRADDN-DEDD2 |
| XP_022806856.1 | TRADDN-DEDD2+ZU5+ZU5+UPA+Death                                | 979  | LOC111343923         | cnidaria      | Stylophora pistillata         | uncharacterized protein LOC111343923 [Stylophora pistillata]                                                    | GCF_002571385.1 | TRADDN-DEDD2 |
| XP_015770516.1 | TRADDN-NCOA6                                                  | 919  | LOC107348937         | cnidaria      | Acropora digitifera           | PREDICTED: rho GTPase-activating protein gacF-like [Acropora digitifera]                                        | GCF_000222465.1 | TRADDN-NCOA6 |
| XP_020902197.1 | TRADDN-NCOA6                                                  | 927  | LOC110240720         | cnidaria      | Exaiptasia pallida            | uncharacterized protein LOC110240720 [Exaiptasia pallida]                                                       | GCF_001417965.1 | TRADDN-NCOA6 |
| XP_001629421.1 | TRADDN-NCOA6                                                  | 1000 | NEMVEDRAFT_v1g245030 | cnidaria      | Nematostella vectensis        | predicted protein [Nematostella vectensis]                                                                      | GCF_000209225.1 | TRADDN-NCOA6 |
| XP_020623664.1 | TRADDN-NCOA6                                                  | 1056 | LOC110061163         | cnidaria      | Orbicella faveolata           | chitinase-like protein PB1E7.04c [Orbicella faveolata]                                                          | GCF_002042975.1 | TRADDN-NCOA6 |
| XP_022781542.1 | TRADDN-NCOA6                                                  | 985  | LOC111322669         | cnidaria      | Stylophora pistillata         | uncharacterized protein LOC111322669 [Stylophora pistillata]                                                    | GCF_002571385.1 | TRADDN-NCOA6 |
| PFX25374.1     | TRADDN-NCOA6+Ankyrin                                          | 1046 | FEM1C                | cnidaria      | Stylophora pistillata         | Protein fem-1-like C [Stylophora pistillata]                                                                    | GCA_002571385.1 | TRADDN-NCOA6 |
| XP_020916389.1 | TRADDN-NCOA6+vWA+vWA                                          | 534  | LOC110253783         | cnidaria      | Exaiptasia pallida            | uncharacterized protein LOC110253783, partial [Exaiptasia pallida]                                              | GCF_001417965.1 | TRADDN-NCOA6 |
| XP_020616729.1 | UBI+UBI+UBI+UBI+UBI+UBI+UBI+UBI+UBI+HEPN+TRADDN-DEDD2+UBI+UBI | 1445 | LOC110054710         | cnidaria      | Orbicella faveolata           | LOW QUALITY PROTEIN: polyubiquitin-C-like [Orbicella faveolata]                                                 | GCF_002042975.1 | TRADDN-DEDD2 |
| KZS16547.1     | TRADDN-NCOA6                                                  | 659  | APZ42_017697         | crustacea     | Daphnia magna                 | Uncharacterized protein APZ42_017697, partial [Daphnia magna]                                                   | GCA_001632505.1 | TRADDN-NCOA6 |
| XP_023339692.1 | TRADDN-NCOA6                                                  | 1600 | LOC111709943         | crustacea     | Eurytemora affinis            | uncharacterized protein LOC111709943 [Eurytemora affinis]                                                       | GCF_000591075.1 | TRADDN-NCOA6 |
| XP_018010260.1 | TRADDN-NCOA6                                                  | 2647 | LOC108667717         | crustacea     | Hyalella azteca               | PREDICTED: mucin-4-like isoform X1 [Hyalella azteca]                                                            | GCF_000764305.1 | TRADDN-NCOA6 |
| XP_018010261.1 | TRADDN-NCOA6                                                  | 2646 | LOC108667717         | crustacea     | Hyalella azteca               | PREDICTED: mucin-4-like isoform X2 [Hyalella azteca]                                                            | GCF_000764305.1 | TRADDN-NCOA6 |
| PIK36113.1     | CARD+Coiled-coil+DED+TRADDN-DEDD2+CARD                        | 1289 | BSL78_27056          | echinodermata | Apostichopus japonicus        | putative up-regulator of cell proliferation-like [Apostichopus japonicus]                                       | GCA_002754855.1 | TRADDN-DEDD2 |
| PIK42735.1     | CARD+DED+Death+TRADDN-DEDD2                                   | 1092 | BSL78_20407          | echinodermata | Apostichopus japonicus        | hypothetical protein BSL78_20407 [Apostichopus japonicus]                                                       | GCA_002754855.1 | TRADDN-DEDD2 |
| XP_011682936.1 | Death+Death+TRADDN-DEDD2                                      | 578  | LOC105447040         | echinodermata | Strongylocentrotus purpuratus | PREDICTED: uncharacterized protein LOC105447040                                                                 | -               | TRADDN-DEDD2 |
| XP_011668608.1 | Death+Death+TRADDN-DEDD2+SAM                                  | 1074 | LOC100890193         | echinodermata | Strongylocentrotus purpuratus | [Strongylocentrotus purpuratus] PREDICTED: uncharacterized protein LOC100890193 [Strongylocentrotus purpuratus] | -               | TRADDN-DEDD2 |

| acc            | architecture                                                                                       | len  | gen.name     | taxend             | species                          | define                                                                                                        | gca             | clade                     |
|----------------|----------------------------------------------------------------------------------------------------|------|--------------|--------------------|----------------------------------|---------------------------------------------------------------------------------------------------------------|-----------------|---------------------------|
| XP_011668610.1 | Death+Death+TRADDN-DEDD2+SAM+STAND+wHTH+TPRs                                                       | 1947 | LOC100890281 | echinoder-<br>mata | Strongylocentrotus<br>purpuratus | PREDICTED: sterile alpha motif<br>domain-containing protein 9-like<br>[Strongylocentrotus purpuratus]         | -               | TRADDN-DEDD2              |
| XP_011681878.1 | Death+Death+TRADDN-DEDD2+SAM+STAND+wHTH+TPRs                                                       | 2028 | LOC105446577 | echinoder-<br>mata | Strongylocentrotus<br>purpuratus | PREDICTED: sterile alpha motif<br>domain-containing protein 9-like<br>[Strongylocentrotus purpuratus]         | -               | TRADDN-DEDD2              |
| XP_011664960.1 | Death+Death+TRADDN-DEDD2+ZU5+UPA                                                                   | 818  | LOC105438624 | echinoder-<br>mata | Strongylocentrotus<br>purpuratus | PREDICTED: uncharacterized<br>protein LOC105438624 isoform X1<br>[Strongylocentrotus purpuratus]              | -               | TRADDN-DEDD2              |
| XP_011664961.1 | Death+Death+TRADDN-DEDD2+ZU5+UPA                                                                   | 710  | LOC105438624 | echinoder-<br>mata | Strongylocentrotus<br>purpuratus | PREDICTED: uncharacterized<br>protein LOC105438624 isoform X2<br>[Strongylocentrotus purpuratus]              | -               | TRADDN-DEDD2              |
| XP_011669783.1 | Death+TM+TM+TRADDN-DEDD2                                                                           | 491  | LOC105440891 | echinoder-<br>mata | Strongylocentrotus<br>purpuratus | PREDICTED: uncharacterized<br>protein LOC105440891<br>[Strongylocentrotus purpuratus]                         | -               | TRADDN-DEDD2              |
| XP_011683422.1 | Death+TRADDN-DEDD2+AP-GTPase                                                                       | 616  | LOC105447276 | echinoder-<br>mata | Strongylocentrotus<br>purpuratus | PREDICTED: uncharacterized<br>protein LOC105447276<br>[Strongylocentrotus purpuratus]                         | -               | TRADDN-DEDD2              |
| XP_022109238.1 | Death+TRADDN-DEDD2+MIB_HERC2+ZZ+MIB_HERC2+SH3+Ankyrin                                              | 1234 | LOC110989278 | echinoder-<br>mata | Acanthaster planci               | uncharacterized protein<br>LOC110989278 isoform X1<br>[Acanthaster planci]                                    | GCF_001949145.1 | TRADDN-DEDD2              |
| XP_022109239.1 | Death+TRADDN-DEDD2+MIB_HERC2+ZZ+MIB_HERC2+SH3+Ankyrin                                              | 1233 | LOC110989278 | echinoder-<br>mata | Acanthaster planci               | uncharacterized protein<br>LOC110989278 isoform X2<br>[Acanthaster planci]                                    | GCF_001949145.1 | TRADDN-DEDD2              |
| XP_022109240.1 | Death+TRADDN-DEDD2+MIB_HERC2+ZZ+MIB_HERC2+SH3+Ankyrin                                              | 1186 | LOC110989278 | echinoder-<br>mata | Acanthaster planci               | uncharacterized protein<br>LOC110989278 isoform X3<br>[Acanthaster planci]                                    | GCF_001949145.1 | TRADDN-DEDD2              |
| XP_022109242.1 | Death+TRADDN-DEDD2+MIB_HERC2+ZZ+MIB_HERC2+SH3+Ankyrin                                              | 1149 | LOC110989278 | echinoder-<br>mata | Acanthaster planci               | E3 ubiquitin-protein ligase<br>MIB2-like isoform X4 [Acanthaster<br>planci]                                   | GCF_001949145.1 | TRADDN-DEDD2              |
| XP_022109243.1 | Death+TRADDN-DEDD2+MIB_HERC2+ZZ+MIB_HERC2+SH3+Ankyrin                                              | 1101 | LOC110989278 | echinoder-<br>mata | Acanthaster planci               | E3 ubiquitin-protein ligase<br>MIB2-like isoform X5 [Acanthaster<br>planci]                                   | GCF_001949145.1 | TRADDN-DEDD2              |
| XP_011676328.1 | Death+TRADDN-DEDD2+SAM                                                                             | 910  | LOC105444162 | echinoder-<br>mata | Strongylocentrotus<br>purpuratus | PREDICTED: uncharacterized<br>protein LOC105444162<br>[Strongylocentrotus purpuratus]                         | -               | TRADDN-DEDD2              |
| XP_022105930.1 | Death+TRADDN-DEDD2+STAND                                                                           | 685  | LOC110987482 | echinoder-<br>mata | Acanthaster planci               | uncharacterized protein<br>LOC110987482 [Acanthaster planci]                                                  | GCF_001949145.1 | TRADDN-DEDD2              |
| PIK50631.1     | DED+DED+TRADDN-DEDD2                                                                               | 799  | BSL78_12477  | echinoder-<br>mata | Apostichopus japonicus           | hypothetical protein BSL78_12477<br>[Apostichopus japonicus]                                                  | GCA_002754855.1 | TRADDN-DEDD2              |
| PIK43142.1     | DED+TRADDN-DEDD2+C2H2-ZF+ZF-CCCH+Pkinase+P-loop-NTPase                                             | 1174 | BSL78_19998  | echinoder-<br>mata | Apostichopus japonicus           | putative serine/threonine-protein<br>kinase/endoribonuclease IRE1-like<br>isoform X4 [Apostichopus japonicus] | GCA_002754855.1 | TRADDN-DEDD2              |
| XP_011667260.1 | FN3+FN3+FN3+FN3+FN3+RVT_1+helical_bundle+RNaseH+lambda_integrase-N+HTH+TRADDN-DEDD2+SAM+STAND+TPRs | 3989 | LOC105439689 | echinoder-<br>mata | Strongylocentrotus<br>purpuratus | PREDICTED: uncharacterized<br>protein LOC105439689<br>[Strongylocentrotus purpuratus]                         | -               | TRADDN-DEDD2              |
| XP_792092.3    | low-complexity+DED+TRADDN-DEDD2                                                                    | 371  | LOC587260    | echinoder-<br>mata | Strongylocentrotus<br>purpuratus | PREDICTED: death effector<br>domain-containing protein<br>[Strongylocentrotus purpuratus]                     | GCF_000002235.5 | TRADDN-DEDD2              |
| XP_022107075.1 | N-ter+TRADDN-Bac+FAM124                                                                            | 407  | LOC110988125 | echinoder-<br>mata | Acanthaster planci               | uncharacterized protein<br>LOC110988125 [Acanthaster planci]                                                  | GCF_001949145.1 | TRADDN-Bacterial-<br>like |

| acc            | architecture                                                                | len  | gen.name     | taxend             | species                       | define                                                                                             | gca             | clade                     |
|----------------|-----------------------------------------------------------------------------|------|--------------|--------------------|-------------------------------|----------------------------------------------------------------------------------------------------|-----------------|---------------------------|
| PIK35605.1     | N-ter+TRADDN-Bac+FAM124                                                     | 383  | BSL78_27565  | echinoder-<br>mata | Apostichopus japonicus        | hypothetical protein BSL78_27565<br>[Apostichopus japonicus]                                       | GCA_002754855.1 | TRADDN-Bacterial-<br>like |
| PIK50692.1     | N-ter+TRADDN-Bac+FAM124                                                     | 383  | BSL78_12425  | echinoder-<br>mata | Apostichopus japonicus        | hypothetical protein BSL78_12425<br>[Apostichopus japonicus]                                       | GCA_002754855.1 | TRADDN-Bacterial-<br>like |
| XP_003726836.1 | N-ter+TRADDN-Bac+FAM124                                                     | 399  | LOC100889127 | echinoder-<br>mata | Strongylocentrotus purpuratus | PREDICTED: uncharacterized protein LOC100889127<br>[Strongylocentrotus purpuratus]                 | -               | TRADDN-Bacterial-<br>like |
| XP_022106408.1 | TRADDN-Bac+TM+TM+TM                                                         | 383  | LOC110987722 | echinoder-<br>mata | Acanthaster planci            | uncharacterized protein LOC110987722 [Acanthaster planci]                                          | GCF_001949145.1 | TRADDN-Bacterial-<br>like |
| XP_022093016.1 | TRADDN-DEDD2                                                                | 272  | LOC110980537 | echinoder-<br>mata | Acanthaster planci            | uncharacterized protein LOC110980537 isoform X1<br>[Acanthaster planci]                            | GCF_001949145.1 | TRADDN-DEDD2              |
| XP_022093018.1 | TRADDN-DEDD2                                                                | 271  | LOC110980537 | echinoder-<br>mata | Acanthaster planci            | uncharacterized protein LOC110980537 isoform X2<br>[Acanthaster planci]                            | GCF_001949145.1 | TRADDN-DEDD2              |
| XP_022093019.1 | TRADDN-DEDD2                                                                | 244  | LOC110980537 | echinoder-<br>mata | Acanthaster planci            | uncharacterized protein LOC110980537 isoform X3<br>[Acanthaster planci]                            | GCF_001949145.1 | TRADDN-DEDD2              |
| PIK33877.1     | TRADDN-DEDD2                                                                | 286  | BSL78_29305  | echinoder-<br>mata | Apostichopus japonicus        | hypothetical protein BSL78_29305<br>[Apostichopus japonicus]                                       | GCA_002754855.1 | TRADDN-DEDD2              |
| PIK49872.1     | TRADDN-DEDD2                                                                | 257  | BSL78_13243  | echinoder-<br>mata | Apostichopus japonicus        | hypothetical protein BSL78_13243<br>[Apostichopus japonicus]                                       | GCA_002754855.1 | TRADDN-DEDD2              |
| XP_011666569.1 | TRADDN-DEDD2+Death                                                          | 242  | LOC105439365 | echinoder-<br>mata | Strongylocentrotus purpuratus | PREDICTED: uncharacterized protein LOC105439365<br>[Strongylocentrotus purpuratus]                 | -               | TRADDN-DEDD2              |
| XP_011679352.1 | TRADDN-DEDD2+Death                                                          | 291  | LOC105445475 | echinoder-<br>mata | Strongylocentrotus purpuratus | PREDICTED: uncharacterized protein LOC105445475 isoform X1<br>[Strongylocentrotus purpuratus]      | -               | TRADDN-DEDD2              |
| XP_011679356.1 | TRADDN-DEDD2+Death                                                          | 290  | LOC105445475 | echinoder-<br>mata | Strongylocentrotus purpuratus | PREDICTED: uncharacterized protein LOC105445475 isoform X2<br>[Strongylocentrotus purpuratus]      | -               | TRADDN-DEDD2              |
| XP_788029.4    | TRADDN-DEDD2+RNA-receptor_SF2-helicase+RNA-receptor_SF2-helicase+RIG-I_C-RD | 809  | LOC583008    | echinoder-<br>mata | Strongylocentrotus purpuratus | PREDICTED: probable ATP-dependent RNA helicase DDX58 [Strongylocentrotus purpuratus]               | -               | TRADDN-DEDD2              |
| XP_011671465.1 | TRADDN-DEDD2+SAM                                                            | 435  | LOC105441747 | echinoder-<br>mata | Strongylocentrotus purpuratus | PREDICTED: uncharacterized protein LOC105441747<br>[Strongylocentrotus purpuratus]                 | -               | TRADDN-DEDD2              |
| XP_011671798.1 | TRADDN-DEDD2+SAM                                                            | 585  | LOC105441891 | echinoder-<br>mata | Strongylocentrotus purpuratus | PREDICTED: uncharacterized protein LOC105441891<br>[Strongylocentrotus purpuratus]                 | -               | TRADDN-DEDD2              |
| XP_022081709.1 | TRADDN-DEDD2+SAM+STAND+wHTH+helical-region                                  | 1712 | LOC110974409 | echinoder-<br>mata | Acanthaster planci            | sterile alpha motif domain-containing protein 9-like<br>[Acanthaster planci]                       | GCF_001949145.1 | TRADDN-DEDD2              |
| XP_003727489.1 | TRADDN-DEDD2+SAM+STAND+wHTH+helical-region+TPRs                             | 1565 | LOC100890659 | echinoder-<br>mata | Strongylocentrotus purpuratus | PREDICTED: sterile alpha motif domain-containing protein 9-like<br>[Strongylocentrotus purpuratus] | -               | TRADDN-DEDD2              |
| XP_022107499.1 | TRADDN-DEDD2+TM+TM+TM+TM                                                    | 592  | LOC110988373 | echinoder-<br>mata | Acanthaster planci            | uncharacterized protein LOC110988373 [Acanthaster planci]                                          | GCF_001949145.1 | TRADDN-DEDD2              |
| XP_022087985.1 | TRADDN-NCOA6                                                                | 2510 | LOC110977825 | echinoder-<br>mata | Acanthaster planci            | mucin-5AC-like isoform X1<br>[Acanthaster planci]                                                  | GCF_001949145.1 | TRADDN-NCOA6              |

| acc            | architecture                                         | len  | gen.name     | taxend             | species                       | define                                                                                  | gca             | clade        |
|----------------|------------------------------------------------------|------|--------------|--------------------|-------------------------------|-----------------------------------------------------------------------------------------|-----------------|--------------|
| XP_022088003.1 | TRADDN-NCOA6                                         | 2506 | LOC110977825 | echinoder-<br>mata | Acanthaster planci            | mucin-5AC-like isoform X2<br>[Acanthaster planci]                                       | GCF_001949145.1 | TRADDN-NCOA6 |
| PIK35968.1     | TRADDN-NCOA6                                         | 1498 | BSL78_27199  | echinoder-<br>mata | Apostichopus japonicus        | hypothetical protein BSL78_27199<br>[Apostichopus japonicus]                            | GCA_002754855.1 | TRADDN-NCOA6 |
| XP_011673750.1 | TRADDN-NCOA6                                         | 314  | LOC105442838 | echinoder-<br>mata | Strongylocentrotus purpuratus | PREDICTED: uncharacterized protein DDB_G0285291-like<br>[Strongylocentrotus purpuratus] | -               | TRADDN-NCOA6 |
| XP_022105938.1 | UBI+Death+UBI+Death+Death+TRADDN-DEDD2               | 1118 | LOC110987487 | echinoder-<br>mata | Acanthaster planci            | uncharacterized protein LOC110987487 isoform X1<br>[Acanthaster planci]                 | GCF_001949145.1 | TRADDN-DEDD2 |
| XP_022105942.1 | UBI+Death+UBI+Death+Death+TRADDN-DEDD2               | 1092 | LOC110987487 | echinoder-<br>mata | Acanthaster planci            | uncharacterized protein LOC110987487 isoform X2<br>[Acanthaster planci]                 | GCF_001949145.1 | TRADDN-DEDD2 |
| XP_022107080.1 | UBI+SAM+TRADDN-DEDD2+SAM+STAND+wHTH+TPRs+Coiled-coil | 2106 | LOC110988130 | echinoder-<br>mata | Acanthaster planci            | sterile alpha motif domain-containing protein 9-like isoform X1 [Acanthaster planci]    | GCF_001949145.1 | TRADDN-DEDD2 |
| XP_022107081.1 | UBI+SAM+TRADDN-DEDD2+SAM+STAND+wHTH+TPRs+Coiled-coil | 2102 | LOC110988130 | echinoder-<br>mata | Acanthaster planci            | sterile alpha motif domain-containing protein 9-like isoform X2 [Acanthaster planci]    | GCF_001949145.1 | TRADDN-DEDD2 |
| XP_022111951.1 | UBI+TRADDN-DEDD2+SAM+STAND+wHTH+TPRs                 | 1886 | LOC110991092 | echinoder-<br>mata | Acanthaster planci            | uncharacterized protein LOC110991092 [Acanthaster planci]                               | GCF_001949145.1 | TRADDN-DEDD2 |
| XP_022110138.1 | UBI+TRADDN-DEDD2+SAM+STAND+wHTH+TPRs+Coiled-coil     | 2003 | LOC110989809 | echinoder-<br>mata | Acanthaster planci            | sterile alpha motif domain-containing protein 9-like isoform X1 [Acanthaster planci]    | GCF_001949145.1 | TRADDN-DEDD2 |
| XP_022110147.1 | UBI+TRADDN-DEDD2+SAM+STAND+wHTH+TPRs+Coiled-coil     | 2002 | LOC110989809 | echinoder-<br>mata | Acanthaster planci            | sterile alpha motif domain-containing protein 9-like isoform X2 [Acanthaster planci]    | GCF_001949145.1 | TRADDN-DEDD2 |
| XP_022110598.1 | UBI+TRADDN-DEDD2+STAND+wHTH+helical-region+LRRs      | 1732 | LOC110990090 | echinoder-<br>mata | Acanthaster planci            | uncharacterized protein LOC110990090 [Acanthaster planci]                               | GCF_001949145.1 | TRADDN-DEDD2 |
| XP_022110603.1 | UBI+UBI+Death+TRADDN-DEDD2                           | 933  | LOC110990092 | echinoder-<br>mata | Acanthaster planci            | uncharacterized protein LOC110990092 [Acanthaster planci]                               | GCF_001949145.1 | TRADDN-DEDD2 |
| XP_022110590.1 | UBI+UBI+TRADDN-DEDD2+STAND+LRRs                      | 1792 | LOC110990087 | echinoder-<br>mata | Acanthaster planci            | uncharacterized protein LOC110990087 isoform X1<br>[Acanthaster planci]                 | GCF_001949145.1 | TRADDN-DEDD2 |
| XP_022110592.1 | UBI+UBI+TRADDN-DEDD2+STAND+LRRs                      | 1739 | LOC110990087 | echinoder-<br>mata | Acanthaster planci            | uncharacterized protein LOC110990087 isoform X3<br>[Acanthaster planci]                 | GCF_001949145.1 | TRADDN-DEDD2 |
| XP_022110591.1 | UBI+UBI+TRADDN-DEDD2+STAND+wHTH+helical-region+LRRs  | 1740 | LOC110990087 | echinoder-<br>mata | Acanthaster planci            | uncharacterized protein LOC110990087 isoform X2<br>[Acanthaster planci]                 | GCF_001949145.1 | TRADDN-DEDD2 |
| XP_006812311.1 | CARD+TRADDN-DEDD2+FN3                                | 977  | LOC102807547 | hemichordata       | Saccoglossus kowalevskii      | PREDICTED: uncharacterized protein LOC102807547 [Saccoglossus kowalevskii]              | GCF_000003605.2 | TRADDN-DEDD2 |
| XP_006825576.1 | Coiled-coil+TRADDN-DEDD2+STAND                       | 1051 | LOC102800950 | hemichordata       | Saccoglossus kowalevskii      | PREDICTED: uncharacterized protein LOC102800950 [Saccoglossus kowalevskii]              | GCF_000003605.2 | TRADDN-DEDD2 |
| XP_006825575.1 | Coiled-coil+TRADDN-DEDD2+STAND+wHTH+helical-repeat   | 1282 | LOC102800837 | hemichordata       | Saccoglossus kowalevskii      | PREDICTED: uncharacterized protein LOC102800837 [Saccoglossus kowalevskii]              | GCF_000003605.2 | TRADDN-DEDD2 |
| XP_002731064.1 | Death+TRADDN-DEDD2+Coiled-coil                       | 771  | LOC100368257 | hemichordata       | Saccoglossus kowalevskii      | PREDICTED: uncharacterized protein LOC100368257 [Saccoglossus kowalevskii]              | GCF_000003605.2 | TRADDN-DEDD2 |

| acc            | architecture                                                 | len  | gen.name     | taxend       | species                  | define                                                                                                           | gca             | clade                 |
|----------------|--------------------------------------------------------------|------|--------------|--------------|--------------------------|------------------------------------------------------------------------------------------------------------------|-----------------|-----------------------|
| XP_006820812.1 | DED+TRADDN-DEDD2                                             | 483  | LOC100366565 | hemichordata | Saccoglossus kowalevskii | PREDICTED: uncharacterized protein LOC100366565 [Saccoglossus kowalevskii]                                       | GCF_000003605.2 | TRADDN-DEDD2          |
| XP_006823454.1 | DED+TRADDN-DEDD2+Ankyrin                                     | 547  | LOC102801342 | hemichordata | Saccoglossus kowalevskii | PREDICTED: early endosome antigen 1-like, partial [Saccoglossus kowalevskii]                                     | GCF_000003605.2 | TRADDN-DEDD2          |
| XP_006816288.1 | DED+TRADDN-DEDD2+Coiled-coil                                 | 828  | LOC102805649 | hemichordata | Saccoglossus kowalevskii | PREDICTED: putative leucine-rich repeat-containing protein DDB_G0290503-like, partial [Saccoglossus kowalevskii] | GCF_000003605.2 | TRADDN-DEDD2          |
| XP_006824354.1 | DED+TRADDN-DEDD2+Coiled-coil+DED                             | 792  | LOC102805146 | hemichordata | Saccoglossus kowalevskii | PREDICTED: uncharacterized protein LOC102805146 [Saccoglossus kowalevskii]                                       | GCF_000003605.2 | TRADDN-DEDD2          |
| XP_006824651.1 | EGF+EGF+EGF+CLECTIN+GT4-GTase+TRADDN-DEDD2                   | 945  | LOC102808514 | hemichordata | Saccoglossus kowalevskii | PREDICTED: uncharacterized protein LOC102808514, partial [Saccoglossus kowalevskii]                              | GCF_000003605.2 | TRADDN-DEDD2          |
| XP_006814349.1 | GT4-GTase+TRADDN-DEDD2                                       | 1053 | LOC102800835 | hemichordata | Saccoglossus kowalevskii | PREDICTED: protein PFC0760c-like [Saccoglossus kowalevskii]                                                      | GCF_000003605.2 | TRADDN-DEDD2          |
| XP_006811676.1 | GT4-GTase+TRADDN-DEDD2+Bcl-2                                 | 814  | LOC102807814 | hemichordata | Saccoglossus kowalevskii | PREDICTED: uncharacterized protein LOC102807814 [Saccoglossus kowalevskii]                                       | GCF_000003605.2 | TRADDN-DEDD2          |
| XP_006823290.1 | GT4-GTase+TRADDN-DEDD2+TM+LRRs                               | 1015 | LOC102801620 | hemichordata | Saccoglossus kowalevskii | PREDICTED: uncharacterized protein LOC102801620, partial [Saccoglossus kowalevskii]                              | GCF_000003605.2 | TRADDN-DEDD2          |
| XP_002735384.1 | N-ter+TRADDN-Bac+FAM124                                      | 412  | LOC100374528 | hemichordata | Saccoglossus kowalevskii | PREDICTED: uncharacterized protein LOC100374528 [Saccoglossus kowalevskii]                                       | GCF_000003605.2 | TRADDN-Bacterial-like |
| XP_006822589.1 | TM+TM+Beta-propeller+GT4-GTase+TRADDN-DEDD2+Ankyrin          | 3508 | LOC102803126 | hemichordata | Saccoglossus kowalevskii | PREDICTED: uncharacterized protein LOC102803126 [Saccoglossus kowalevskii]                                       | GCF_000003605.2 | TRADDN-DEDD2          |
| XP_006824219.1 | TM+TRADDN-DEDD2+TM+TM+TM+TM+TM                               | 615  | LOC102808738 | hemichordata | Saccoglossus kowalevskii | PREDICTED: uncharacterized protein LOC102808738 [Saccoglossus kowalevskii]                                       | GCF_000003605.2 | TRADDN-DEDD2          |
| XP_006821553.1 | TRADDN-DEDD2                                                 | 260  | LOC102801950 | hemichordata | Saccoglossus kowalevskii | PREDICTED: uncharacterized protein LOC102801950, partial [Saccoglossus kowalevskii]                              | GCF_000003605.2 | TRADDN-DEDD2          |
| XP_006822240.1 | TRADDN-DEDD2                                                 | 1314 | LOC100371376 | hemichordata | Saccoglossus kowalevskii | PREDICTED: microtubule-associated protein 1B-like [Saccoglossus kowalevskii]                                     | GCF_000003605.2 | TRADDN-DEDD2          |
| XP_006823467.1 | TRADDN-DEDD2                                                 | 120  | LOC102803591 | hemichordata | Saccoglossus kowalevskii | PREDICTED: death effector domain-containing protein-like, partial [Saccoglossus kowalevskii]                     | GCF_000003605.2 | TRADDN-DEDD2          |
| XP_006822047.1 | TRADDN-DEDD2+Ankyrin                                         | 670  | LOC102807037 | hemichordata | Saccoglossus kowalevskii | PREDICTED: ankyrin repeat domain-containing protein 50-like [Saccoglossus kowalevskii]                           | GCF_000003605.2 | TRADDN-DEDD2          |
| XP_006822031.1 | TRADDN-DEDD2+CDC48_N+Coiled-coil+Classical-AAA+Classical-AAA | 1246 | LOC100375289 | hemichordata | Saccoglossus kowalevskii | PREDICTED: transitional endoplasmic reticulum ATPase-like [Saccoglossus kowalevskii]                             | GCF_000003605.2 | TRADDN-DEDD2          |
| XP_006811155.1 | TRADDN-DEDD2+Coiled-coil                                     | 362  | LOC102809883 | hemichordata | Saccoglossus kowalevskii | PREDICTED: uncharacterized protein LOC102809883 [Saccoglossus kowalevskii]                                       | GCF_000003605.2 | TRADDN-DEDD2          |

| acc            | architecture                | len  | gen.name        | taxend       | species                  | define                                                                                            | gca             | clade        |
|----------------|-----------------------------|------|-----------------|--------------|--------------------------|---------------------------------------------------------------------------------------------------|-----------------|--------------|
| XP_006812069.1 | TRADDN-DEDD2+Coiled-coil    | 337  | LOC102807464    | hemichordata | Saccoglossus kowalevskii | PREDICTED: uncharacterized protein LOC102807464 [Saccoglossus kowalevskii]                        | GCF_000003605.2 | TRADDN-DEDD2 |
| XP_006819467.1 | TRADDN-DEDD2+TM+Coiled-coil | 1062 | LOC102807364    | hemichordata | Saccoglossus kowalevskii | PREDICTED: uncharacterized protein LOC102807364 [Saccoglossus kowalevskii]                        | GCF_000003605.2 | TRADDN-DEDD2 |
| XP_006822792.1 | TRADDN-NCOA6                | 2092 | LOC100375987    | hemichordata | Saccoglossus kowalevskii | PREDICTED: mediator of RNA polymerase II transcription subunit 12-like [Saccoglossus kowalevskii] | GCF_000003605.2 | TRADDN-NCOA6 |
| XP_011062119.1 | TRADDN-NCOA6                | 2294 | LOC105150621    | hexapoda     | Acromyrmex echinaior     | PREDICTED: uncharacterized protein LOC105150621 isoform X1 [Acromyrmex echinaior]                 | GCF_000204515.1 | TRADDN-NCOA6 |
| XP_011062120.1 | TRADDN-NCOA6                | 2292 | LOC105150621    | hexapoda     | Acromyrmex echinaior     | PREDICTED: uncharacterized protein LOC105150621 isoform X2 [Acromyrmex echinaior]                 | GCF_000204515.1 | TRADDN-NCOA6 |
| XP_011062121.1 | TRADDN-NCOA6                | 2283 | LOC105150621    | hexapoda     | Acromyrmex echinaior     | PREDICTED: uncharacterized protein LOC105150621 isoform X3 [Acromyrmex echinaior]                 | GCF_000204515.1 | TRADDN-NCOA6 |
| XP_011062122.1 | TRADDN-NCOA6                | 2247 | LOC105150621    | hexapoda     | Acromyrmex echinaior     | PREDICTED: uncharacterized protein LOC105150621 isoform X4 [Acromyrmex echinaior]                 | GCF_000204515.1 | TRADDN-NCOA6 |
| XP_011062123.1 | TRADDN-NCOA6                | 2082 | LOC105150621    | hexapoda     | Acromyrmex echinaior     | PREDICTED: bromodomain-containing protein DDB_G0270170-like isoform X5 [Acromyrmex echinaior]     | GCF_000204515.1 | TRADDN-NCOA6 |
| XP_011062124.1 | TRADDN-NCOA6                | 2080 | LOC105150621    | hexapoda     | Acromyrmex echinaior     | PREDICTED: bromodomain-containing protein DDB_G0270170-like isoform X6 [Acromyrmex echinaior]     | GCF_000204515.1 | TRADDN-NCOA6 |
| XP_011062125.1 | TRADDN-NCOA6                | 2055 | LOC105150621    | hexapoda     | Acromyrmex echinaior     | PREDICTED: bromodomain-containing protein DDB_G0270170-like isoform X7 [Acromyrmex echinaior]     | GCF_000204515.1 | TRADDN-NCOA6 |
| XP_011062126.1 | TRADDN-NCOA6                | 2044 | LOC105150621    | hexapoda     | Acromyrmex echinaior     | PREDICTED: bromodomain-containing protein DDB_G0270170-like isoform X8 [Acromyrmex echinaior]     | GCF_000204515.1 | TRADDN-NCOA6 |
| XP_011062127.1 | TRADDN-NCOA6                | 2033 | LOC105150621    | hexapoda     | Acromyrmex echinaior     | PREDICTED: bromodomain-containing protein DDB_G0270170-like isoform X9 [Acromyrmex echinaior]     | GCF_000204515.1 | TRADDN-NCOA6 |
| XP_008184466.1 | TRADDN-NCOA6                | 1508 | LOC100570013    | hexapoda     | Acyrtosiphon pisum       | PREDICTED: uncharacterized protein LOC100570013 isoform X1 [Acyrtosiphon pisum]                   | GCF_005508785.1 | TRADDN-NCOA6 |
| XP_008184467.1 | TRADDN-NCOA6                | 1506 | LOC100570013    | hexapoda     | Acyrtosiphon pisum       | PREDICTED: uncharacterized protein LOC100570013 isoform X2 [Acyrtosiphon pisum]                   | GCF_005508785.1 | TRADDN-NCOA6 |
| XP_008184468.1 | TRADDN-NCOA6                | 1472 | LOC100570013    | hexapoda     | Acyrtosiphon pisum       | PREDICTED: uncharacterized protein LOC100570013 isoform X3 [Acyrtosiphon pisum]                   | GCF_005508785.1 | TRADDN-NCOA6 |
| EAT38891.1     | TRADDN-NCOA6                | 2378 | AaeL_AAEL009265 | hexapoda     | Aedes aegypti            | AAEL009265-PA [Aedes aegypti]                                                                     | GCA_000004015.3 | TRADDN-NCOA6 |



| acc            | architecture | len  | gen.name        | taxend   | species                     | define                                                                                                              | gca             | clade        |
|----------------|--------------|------|-----------------|----------|-----------------------------|---------------------------------------------------------------------------------------------------------------------|-----------------|--------------|
| XP_021700734.1 | TRADDN-NCOA6 | 2237 | LOC5571731      | hexapoda | Aedes aegypti               | uncharacterized protein LOC5571731 isoform X1 [Aedes aegypti]                                                       | GCF_002204515.2 | TRADDN-NCOA6 |
| XP_021700736.1 | TRADDN-NCOA6 | 2195 | LOC5571731      | hexapoda | Aedes aegypti               | uncharacterized protein LOC5571731 isoform X2 [Aedes aegypti]                                                       | GCF_002204515.2 | TRADDN-NCOA6 |
| KXJ80712.1     | TRADDN-NCOA6 | 2343 | RP20_CCG023748  | hexapoda | Aedes albopictus            | hypothetical protein RP20_CCG023748 [Aedes albopictus]                                                              | GCA_001444175.2 | TRADDN-NCOA6 |
| XP_019540319.1 | TRADDN-NCOA6 | 2213 | LOC109411255    | hexapoda | Aedes albopictus            | PREDICTED: uncharacterized protein LOC109411255 [Aedes albopictus]                                                  | -               | TRADDN-NCOA6 |
| XP_019564984.1 | TRADDN-NCOA6 | 2272 | LOC109433059    | hexapoda | Aedes albopictus            | PREDICTED: uncharacterized protein LOC109433059 [Aedes albopictus]                                                  | -               | TRADDN-NCOA6 |
| XP_018334564.1 | TRADDN-NCOA6 | 1413 | LOC108743489    | hexapoda | Agrilus planipennis         | PREDICTED: uncharacterized protein LOC108743489 [Agrilus planipennis]                                               | -               | TRADDN-NCOA6 |
| XP_013191593.1 | TRADDN-NCOA6 | 1576 | LOC106135763    | hexapoda | Amyeloides transitella      | PREDICTED: uncharacterized protein LOC106135763 [Amyeloides transitella]                                            | GCF_001186105.1 | TRADDN-NCOA6 |
| ETN61294.1     | TRADDN-NCOA6 | 3050 | AND_007043      | hexapoda | Anopheles darlingi          | hypothetical protein AND_007043 [Anopheles darlingi]                                                                | GCA_000211455.3 | TRADDN-NCOA6 |
| XP_001689054.1 | TRADDN-NCOA6 | 2423 | AgaP_AGAP007771 | hexapoda | Anopheles gambiae str. PEST | AGAP007771-PA, partial [Anopheles gambiae str. PEST]                                                                | GCF_000005575.2 | TRADDN-NCOA6 |
| KFB46201.1     | TRADDN-NCOA6 | 461  | ZHAS_00014205   | hexapoda | Anopheles sinensis          | AGAP007771-PA-like protein [Anopheles sinensis]                                                                     | GCA_000441895.2 | TRADDN-NCOA6 |
| XP_018568099.1 | TRADDN-NCOA6 | 1508 | LOC108908525    | hexapoda | Anoplophora glabripennis    | uncharacterized protein LOC108908525 [Anoplophora glabripennis]                                                     | GCF_000390285.2 | TRADDN-NCOA6 |
| XP_016905450.1 | TRADDN-NCOA6 | 2244 | LOC107993508    | hexapoda | Apis cerana                 | PREDICTED: putative mediator of RNA polymerase II transcription subunit 26 [Apis cerana]                            | GCF_001442555.1 | TRADDN-NCOA6 |
| PBC29023.1     | TRADDN-NCOA6 | 2416 | APICC_03446     | hexapoda | Apis cerana cerana          | RNA-binding protein pno1 [Apis cerana cerana]                                                                       | GCA_002290385.1 | TRADDN-NCOA6 |
| XP_006618876.1 | TRADDN-NCOA6 | 2252 | LOC102680856    | hexapoda | Apis dorsata                | PREDICTED: LOW QUALITY PROTEIN: putative mediator of RNA polymerase II transcription subunit 26-like [Apis dorsata] | -               | TRADDN-NCOA6 |
| XP_016768247.1 | TRADDN-NCOA6 | 2239 | LOC725706       | hexapoda | Apis mellifera              | putative mediator of RNA polymerase II transcription subunit 26 isoform X1 [Apis mellifera]                         | GCF_003254395.2 | TRADDN-NCOA6 |
| XP_016768249.1 | TRADDN-NCOA6 | 2229 | LOC725706       | hexapoda | Apis mellifera              | putative mediator of RNA polymerase II transcription subunit 26 isoform X2 [Apis mellifera]                         | GCF_003254395.2 | TRADDN-NCOA6 |
| XP_016768250.1 | TRADDN-NCOA6 | 2227 | LOC725706       | hexapoda | Apis mellifera              | putative mediator of RNA polymerase II transcription subunit 26 isoform X3 [Apis mellifera]                         | GCF_003254395.2 | TRADDN-NCOA6 |
| XP_016768251.1 | TRADDN-NCOA6 | 2215 | LOC725706       | hexapoda | Apis mellifera              | putative mediator of RNA polymerase II transcription subunit 26 isoform X4 [Apis mellifera]                         | GCF_003254395.2 | TRADDN-NCOA6 |

| acc            | architecture | len  | gen.name     | taxend   | species                     | define                                                                                                      | gca             | clade        |
|----------------|--------------|------|--------------|----------|-----------------------------|-------------------------------------------------------------------------------------------------------------|-----------------|--------------|
| XP_016768252.1 | TRADDN-NCOA6 | 2080 | LOC725706    | hexapoda | <i>Apis mellifera</i>       | putative mediator of RNA polymerase II transcription subunit 26 isoform X5 [ <i>Apis mellifera</i> ]        | GCF_003254395.2 | TRADDN-NCOA6 |
| XP_012257407.1 | TRADDN-NCOA6 | 2226 | LOC105686833 | hexapoda | <i>Athalia rosae</i>        | serine/arginine repetitive matrix protein 2-like [ <i>Athalia rosae</i> ]                                   | GCF_000344095.2 | TRADDN-NCOA6 |
| XP_012062303.1 | TRADDN-NCOA6 | 2279 | LOC105625590 | hexapoda | <i>Atta cephalotes</i>      | PREDICTED: putative mediator of RNA polymerase II transcription subunit 26 [ <i>Atta cephalotes</i> ]       | GCF_000143395.1 | TRADDN-NCOA6 |
| KYM77727.1     | TRADDN-NCOA6 | 2250 | ALC53_11738  | hexapoda | <i>Atta colombica</i>       | Nuclear receptor coactivator 6 [ <i>Atta colombica</i> ]                                                    | GCA_001594045.1 | TRADDN-NCOA6 |
| XP_018054838.1 | TRADDN-NCOA6 | 2282 | LOC108691560 | hexapoda | <i>Atta colombica</i>       | PREDICTED: serine-rich adhesin for platelets isoform X1 [ <i>Atta colombica</i> ]                           | GCF_001594045.1 | TRADDN-NCOA6 |
| XP_018054840.1 | TRADDN-NCOA6 | 2271 | LOC108691560 | hexapoda | <i>Atta colombica</i>       | PREDICTED: uncharacterized protein LOC108691560 isoform X2 [ <i>Atta colombica</i> ]                        | GCF_001594045.1 | TRADDN-NCOA6 |
| XP_018802060.1 | TRADDN-NCOA6 | 2428 | LOC108977023 | hexapoda | <i>Bactrocera latifrons</i> | PREDICTED: probable serine/threonine-protein kinase DDB_G0282963 isoform X1 [ <i>Bactrocera latifrons</i> ] | GCF_001853355.1 | TRADDN-NCOA6 |
| XP_018802061.1 | TRADDN-NCOA6 | 2427 | LOC108977023 | hexapoda | <i>Bactrocera latifrons</i> | PREDICTED: probable serine/threonine-protein kinase DDB_G0282963 isoform X2 [ <i>Bactrocera latifrons</i> ] | GCF_001853355.1 | TRADDN-NCOA6 |
| XP_014095526.1 | TRADDN-NCOA6 | 2258 | LOC106621276 | hexapoda | <i>Bactrocera oleae</i>     | PREDICTED: serine-rich adhesin for platelets-like isoform X1 [ <i>Bactrocera oleae</i> ]                    | GCF_001188975.1 | TRADDN-NCOA6 |
| XP_014095527.1 | TRADDN-NCOA6 | 2257 | LOC106621276 | hexapoda | <i>Bactrocera oleae</i>     | PREDICTED: serine-rich adhesin for platelets-like isoform X2 [ <i>Bactrocera oleae</i> ]                    | GCF_001188975.1 | TRADDN-NCOA6 |
| XP_014095528.1 | TRADDN-NCOA6 | 2257 | LOC106621276 | hexapoda | <i>Bactrocera oleae</i>     | PREDICTED: serine-rich adhesin for platelets-like isoform X3 [ <i>Bactrocera oleae</i> ]                    | GCF_001188975.1 | TRADDN-NCOA6 |
| XP_014095529.1 | TRADDN-NCOA6 | 2239 | LOC106621276 | hexapoda | <i>Bactrocera oleae</i>     | PREDICTED: serine-rich adhesin for platelets-like isoform X4 [ <i>Bactrocera oleae</i> ]                    | GCF_001188975.1 | TRADDN-NCOA6 |
| XP_014095530.1 | TRADDN-NCOA6 | 2231 | LOC106621276 | hexapoda | <i>Bactrocera oleae</i>     | PREDICTED: serine-rich adhesin for platelets-like isoform X5 [ <i>Bactrocera oleae</i> ]                    | GCF_001188975.1 | TRADDN-NCOA6 |
| XP_018909976.1 | TRADDN-NCOA6 | 2107 | LOC109039092 | hexapoda | <i>Bemisia tabaci</i>       | PREDICTED: uncharacterized protein LOC109039092 [ <i>Bemisia tabaci</i> ]                                   | GCF_001854935.1 | TRADDN-NCOA6 |
| XP_023944256.1 | TRADDN-NCOA6 | 1708 | LOC112050261 | hexapoda | <i>Bicyclus anynana</i>     | uncharacterized protein LOC112050261 [ <i>Bicyclus anynana</i> ]                                            | GCF_900239965.1 | TRADDN-NCOA6 |
| PSN32597.1     | TRADDN-NCOA6 | 2647 | C0J52_15181  | hexapoda | <i>Blattella germanica</i>  | hypothetical protein C0J52_15181 [ <i>Blattella germanica</i> ]                                             | GCA_003018175.1 | TRADDN-NCOA6 |
| XP_012236498.1 | TRADDN-NCOA6 | 2247 | LOC100746843 | hexapoda | <i>Bombus impatiens</i>     | uncharacterized protein LOC100746843 isoform X1 [ <i>Bombus impatiens</i> ]                                 | GCF_000188095.3 | TRADDN-NCOA6 |
| XP_012236500.1 | TRADDN-NCOA6 | 2237 | LOC100746843 | hexapoda | <i>Bombus impatiens</i>     | uncharacterized protein LOC100746843 isoform X2 [ <i>Bombus impatiens</i> ]                                 | GCF_000188095.3 | TRADDN-NCOA6 |

| acc            | architecture | len  | gen.name     | taxend   | species               | define                                                                        | gca             | clade        |
|----------------|--------------|------|--------------|----------|-----------------------|-------------------------------------------------------------------------------|-----------------|--------------|
| XP_012236501.1 | TRADDN-NCOA6 | 2235 | LOC100746843 | hexapoda | Bombus impatiens      | uncharacterized protein<br>LOC100746843 isoform X3 [Bombus<br>impatiens]      | GCF_000188095.3 | TRADDN-NCOA6 |
| XP_012236502.1 | TRADDN-NCOA6 | 2223 | LOC100746843 | hexapoda | Bombus impatiens      | uncharacterized protein<br>LOC100746843 isoform X5 [Bombus<br>impatiens]      | GCF_000188095.3 | TRADDN-NCOA6 |
| XP_012236503.1 | TRADDN-NCOA6 | 2088 | LOC100746843 | hexapoda | Bombus impatiens      | uncharacterized protein<br>LOC100746843 isoform X7 [Bombus<br>impatiens]      | GCF_000188095.3 | TRADDN-NCOA6 |
| XP_024220777.1 | TRADDN-NCOA6 | 2224 | LOC100746843 | hexapoda | Bombus impatiens      | uncharacterized protein<br>LOC100746843 isoform X4 [Bombus<br>impatiens]      | GCF_000188095.3 | TRADDN-NCOA6 |
| XP_024220778.1 | TRADDN-NCOA6 | 2214 | LOC100746843 | hexapoda | Bombus impatiens      | uncharacterized protein<br>LOC100746843 isoform X6 [Bombus<br>impatiens]      | GCF_000188095.3 | TRADDN-NCOA6 |
| XP_003402722.1 | TRADDN-NCOA6 | 2235 | LOC100651147 | hexapoda | Bombus terrestris     | uncharacterized protein<br>LOC100651147 isoform X2 [Bombus<br>terrestris]     | GCF_000214255.1 | TRADDN-NCOA6 |
| XP_020723554.1 | TRADDN-NCOA6 | 2245 | LOC100651147 | hexapoda | Bombus terrestris     | uncharacterized protein<br>LOC100651147 isoform X1 [Bombus<br>terrestris]     | GCF_000214255.1 | TRADDN-NCOA6 |
| XP_020723557.1 | TRADDN-NCOA6 | 2233 | LOC100651147 | hexapoda | Bombus terrestris     | uncharacterized protein<br>LOC100651147 isoform X3 [Bombus<br>terrestris]     | GCF_000214255.1 | TRADDN-NCOA6 |
| XP_020723558.1 | TRADDN-NCOA6 | 2222 | LOC100651147 | hexapoda | Bombus terrestris     | uncharacterized protein<br>LOC100651147 isoform X4 [Bombus<br>terrestris]     | GCF_000214255.1 | TRADDN-NCOA6 |
| XP_020723559.1 | TRADDN-NCOA6 | 2221 | LOC100651147 | hexapoda | Bombus terrestris     | uncharacterized protein<br>LOC100651147 isoform X5 [Bombus<br>terrestris]     | GCF_000214255.1 | TRADDN-NCOA6 |
| XP_020723560.1 | TRADDN-NCOA6 | 2212 | LOC100651147 | hexapoda | Bombus terrestris     | uncharacterized protein<br>LOC100651147 isoform X6 [Bombus<br>terrestris]     | GCF_000214255.1 | TRADDN-NCOA6 |
| XP_020723561.1 | TRADDN-NCOA6 | 2086 | LOC100651147 | hexapoda | Bombus terrestris     | uncharacterized protein<br>LOC100651147 isoform X7 [Bombus<br>terrestris]     | GCF_000214255.1 | TRADDN-NCOA6 |
| XP_021203661.1 | TRADDN-NCOA6 | 1280 | LOC101738211 | hexapoda | Bombyx mori           | nuclear receptor coactivator 6-like,<br>partial [Bombyx mori]                 | GCF_000151625.1 | TRADDN-NCOA6 |
| EFN61718.1     | TRADDN-NCOA6 | 2139 | EAG_05855    | hexapoda | Camponotus floridanus | Nuclear receptor coactivator 6<br>[Camponotus floridanus]                     | GCA_000147175.1 | TRADDN-NCOA6 |
| XP_011265954.1 | TRADDN-NCOA6 | 2288 | LOC105257194 | hexapoda | Camponotus floridanus | uncharacterized protein<br>LOC105257194 isoform X1<br>[Camponotus floridanus] | GCF_003227725.1 | TRADDN-NCOA6 |
| XP_011265957.1 | TRADDN-NCOA6 | 2277 | LOC105257194 | hexapoda | Camponotus floridanus | uncharacterized protein<br>LOC105257194 isoform X2<br>[Camponotus floridanus] | GCF_003227725.1 | TRADDN-NCOA6 |
| XP_015586594.1 | TRADDN-NCOA6 | 2273 | LOC107263660 | hexapoda | Cephus cinctus        | uncharacterized protein<br>LOC107263660 isoform X1 [Cephus<br>cinctus]        | GCF_000341935.1 | TRADDN-NCOA6 |
| XP_015586595.1 | TRADDN-NCOA6 | 2263 | LOC107263660 | hexapoda | Cephus cinctus        | uncharacterized protein<br>LOC107263660 isoform X2 [Cephus<br>cinctus]        | GCF_000341935.1 | TRADDN-NCOA6 |

| acc            | architecture | len  | gen.name                                | taxend   | species                     | define                                                                                               | gca             | clade        |
|----------------|--------------|------|-----------------------------------------|----------|-----------------------------|------------------------------------------------------------------------------------------------------|-----------------|--------------|
| XP_015586596.1 | TRADDN-NCOA6 | 2249 | LOC107263660                            | hexapoda | Cephus cinctus              | uncharacterized protein<br>LOC107263660 isoform X3 [Cephus<br>cinctus]                               | GCF_000341935.1 | TRADDN-NCOA6 |
| XP_015586597.1 | TRADDN-NCOA6 | 2225 | LOC107263660                            | hexapoda | Cephus cinctus              | uncharacterized protein<br>LOC107263660 isoform X4 [Cephus<br>cinctus]                               | GCF_000341935.1 | TRADDN-NCOA6 |
| XP_015586598.1 | TRADDN-NCOA6 | 2158 | LOC107263660                            | hexapoda | Cephus cinctus              | uncharacterized protein<br>LOC107263660 isoform X5 [Cephus<br>cinctus]                               | GCF_000341935.1 | TRADDN-NCOA6 |
| XP_017890956.1 | TRADDN-NCOA6 | 2245 | LOC108631503                            | hexapoda | Ceratina calcarata          | uncharacterized protein<br>LOC108631503 isoform X1 [Ceratina<br>calcarata]                           | GCF_001652005.1 | TRADDN-NCOA6 |
| XP_017890957.1 | TRADDN-NCOA6 | 2231 | LOC108631503                            | hexapoda | Ceratina calcarata          | PREDICTED: uncharacterized<br>protein LOC108631503 isoform X2<br>[Ceratina calcarata]                | -               | TRADDN-NCOA6 |
| XP_012156850.1 | TRADDN-NCOA6 | 2498 | LOC101451441                            | hexapoda | Ceratitis capitata          | uncharacterized protein<br>LOC101451441 isoform X1 [Ceratitis<br>capitata]                           | GCF_000347755.3 | TRADDN-NCOA6 |
| XP_012156851.1 | TRADDN-NCOA6 | 2497 | LOC101451441                            | hexapoda | Ceratitis capitata          | uncharacterized protein<br>LOC101451441 isoform X2 [Ceratitis<br>capitata]                           | GCF_000347755.3 | TRADDN-NCOA6 |
| XP_011501182.1 | TRADDN-NCOA6 | 2507 | LOC105364851                            | hexapoda | Ceratosolen solmsi marchali | PREDICTED: uncharacterized<br>protein LOC105364851 [Ceratosolen<br>solmsi marchali]                  | GCF_000503995.1 | TRADDN-NCOA6 |
| XP_014241680.1 | TRADDN-NCOA6 | 898  | LOC106662255                            | hexapoda | Cimex lectularius           | titin-like isoform X2 [Cimex<br>lectularius]                                                         | GCF_000648675.2 | TRADDN-NCOA6 |
| XP_024081587.1 | TRADDN-NCOA6 | 901  | LOC106662255                            | hexapoda | Cimex lectularius           | nuclear receptor coactivator 6-like<br>isoform X1 [Cimex lectularius]                                | GCF_000648675.2 | TRADDN-NCOA6 |
| CRK89745.1     | TRADDN-NCOA6 | 2026 | putative,Nuclear,receptor,coactivator,6 | hexapoda | Clunio marinus              | CLUMA_CG003408, isoform A<br>[Clunio marinus]                                                        | GCA_900005825.1 | TRADDN-NCOA6 |
| XP_023244951.1 | TRADDN-NCOA6 | 2578 | LOC106639766                            | hexapoda | Copidosoma floridanum       | uncharacterized protein<br>LOC106639766 [Copidosoma<br>floridanum]                                   | GCF_000648655.2 | TRADDN-NCOA6 |
| XP_023710716.1 | TRADDN-NCOA6 | 2718 | LOC111866191                            | hexapoda | Cryptotermes secundus       | uncharacterized protein<br>LOC111866191 isoform X1<br>[Cryptotermes secundus]                        | GCF_002891405.2 | TRADDN-NCOA6 |
| XP_023711129.1 | TRADDN-NCOA6 | 2717 | LOC111866191                            | hexapoda | Cryptotermes secundus       | uncharacterized protein<br>LOC111866191 isoform X2<br>[Cryptotermes secundus]                        | GCF_002891405.2 | TRADDN-NCOA6 |
| XP_001842144.1 | TRADDN-NCOA6 | 2320 | CpipJ_CPLJ000474                        | hexapoda | Culex quinquefasciatus      | conserved hypothetical protein<br>[Culex quinquefasciatus]                                           | GCF_000209185.1 | TRADDN-NCOA6 |
| KYN07097.1     | TRADDN-NCOA6 | 2253 | ALC62_01905                             | hexapoda | Cyphomyrmex costatus        | Nuclear receptor coactivator 6<br>[Cyphomyrmex costatus]                                             | GCA_001594065.1 | TRADDN-NCOA6 |
| XP_018406241.1 | TRADDN-NCOA6 | 2252 | LOC108782459                            | hexapoda | Cyphomyrmex costatus        | PREDICTED: LOW QUALITY<br>PROTEIN: uncharacterized protein<br>LOC108782459 [Cyphomyrmex<br>costatus] | GCF_001594065.1 | TRADDN-NCOA6 |
| OWR54636.1     | TRADDN-NCOA6 | 1648 | KGM_216157                              | hexapoda | Danaus plexippus            | hypothetical protein KGM_216157<br>[Danaus plexippus plexippus]                                      | GCA_000235995.2 | TRADDN-NCOA6 |
| XP_019769268.1 | TRADDN-NCOA6 | 1712 | LOC109543823                            | hexapoda | Dendroctonus ponderosae     | PREDICTED: uncharacterized<br>protein LOC109543823 isoform X1<br>[Dendroctonus ponderosae]           | GCF_000355655.1 | TRADDN-NCOA6 |

| acc            | architecture | len  | gen.name                  | taxend   | species                 | define                                                                                                      | gca             | clade        |
|----------------|--------------|------|---------------------------|----------|-------------------------|-------------------------------------------------------------------------------------------------------------|-----------------|--------------|
| XP_019769270.1 | TRADDN-NCOA6 | 1711 | LOC109543823              | hexapoda | Dendroctonus ponderosae | PREDICTED: uncharacterized protein LOC109543823 isoform X2 [Dendroctonus ponderosae]                        | GCF_000355655.1 | TRADDN-NCOA6 |
| XP_019769271.1 | TRADDN-NCOA6 | 1708 | LOC109543823              | hexapoda | Dendroctonus ponderosae | PREDICTED: uncharacterized protein LOC109543823 isoform X3 [Dendroctonus ponderosae]                        | GCF_000355655.1 | TRADDN-NCOA6 |
| XP_019769272.1 | TRADDN-NCOA6 | 1707 | LOC109543823              | hexapoda | Dendroctonus ponderosae | PREDICTED: uncharacterized protein LOC109543823 isoform X4 [Dendroctonus ponderosae]                        | GCF_000355655.1 | TRADDN-NCOA6 |
| XP_015124832.1 | TRADDN-NCOA6 | 2126 | LOC107046674              | hexapoda | Diachasma alloeum       | PREDICTED: uncharacterized protein LOC107046674 [Diachasma alloeum]                                         | GCF_001412515.2 | TRADDN-NCOA6 |
| XP_017298161.1 | TRADDN-NCOA6 | 1849 | LOC103505989              | hexapoda | Diaphorina citri        | WASH complex subunit 2 [Diaphorina citri]                                                                   | GCF_000475195.1 | TRADDN-NCOA6 |
| XP_014469461.1 | TRADDN-NCOA6 | 2234 | LOC106741710              | hexapoda | Dinoponera quadriceps   | PREDICTED: uncharacterized protein LOC106741710 isoform X1 [Dinoponera quadriceps]                          | GCF_001313825.1 | TRADDN-NCOA6 |
| XP_014469463.1 | TRADDN-NCOA6 | 2220 | LOC106741710              | hexapoda | Dinoponera quadriceps   | PREDICTED: uncharacterized protein LOC106741710 isoform X2 [Dinoponera quadriceps]                          | GCF_001313825.1 | TRADDN-NCOA6 |
| XP_015380052.1 | TRADDN-NCOA6 | 1493 | LOC107173851              | hexapoda | Diuraphis noxia         | PREDICTED: uncharacterized protein LOC107173851 [Diuraphis noxia]                                           | GCF_001186385.1 | TRADDN-NCOA6 |
| XP_001962545.2 | TRADDN-NCOA6 | 2295 | dana_GLEANR_16282,GF15516 | hexapoda | Drosophila ananassae    | uncharacterized protein Dana_GF15516 [Drosophila ananassae]                                                 | GCF_000005115.1 | TRADDN-NCOA6 |
| XP_017859165.1 | TRADDN-NCOA6 | 2412 | LOC108611180              | hexapoda | Drosophila arizonae     | PREDICTED: putative mediator of RNA polymerase II transcription subunit 26 isoform X1 [Drosophila arizonae] | GCF_001654025.1 | TRADDN-NCOA6 |
| XP_017859166.1 | TRADDN-NCOA6 | 2055 | LOC108611180              | hexapoda | Drosophila arizonae     | PREDICTED: putative mediator of RNA polymerase II transcription subunit 26 isoform X2 [Drosophila arizonae] | GCF_001654025.1 | TRADDN-NCOA6 |
| XP_016956652.1 | TRADDN-NCOA6 | 2289 | LOC108029079              | hexapoda | Drosophila biarmipes    | PREDICTED: nuclear receptor coactivator 6 isoform X1 [Drosophila biarmipes]                                 | GCF_000233415.1 | TRADDN-NCOA6 |
| XP_016956653.1 | TRADDN-NCOA6 | 2288 | LOC108029079              | hexapoda | Drosophila biarmipes    | PREDICTED: nuclear receptor coactivator 6 isoform X2 [Drosophila biarmipes]                                 | GCF_000233415.1 | TRADDN-NCOA6 |
| XP_017099792.1 | TRADDN-NCOA6 | 2227 | LOC108127313              | hexapoda | Drosophila bipectinata  | PREDICTED: putative mediator of RNA polymerase II transcription subunit 26 [Drosophila bipectinata]         | GCF_000236285.1 | TRADDN-NCOA6 |
| ALC38286.1     | TRADDN-NCOA6 | 1954 | Dbus_chr2Lg371            | hexapoda | Drosophila busckii      | Ncoa6 [Drosophila busckii]                                                                                  | GCA_001277935.1 | TRADDN-NCOA6 |
| XP_017854487.1 | TRADDN-NCOA6 | 2278 | LOC108607892              | hexapoda | Drosophila busckii      | PREDICTED: nuclear receptor coactivator 6 [Drosophila busckii]                                              | GCF_001277935.1 | TRADDN-NCOA6 |
| XP_017132283.1 | TRADDN-NCOA6 | 2341 | LOC108149330              | hexapoda | Drosophila elegans      | PREDICTED: nuclear receptor coactivator 6 isoform X1 [Drosophila elegans]                                   | GCF_000224195.1 | TRADDN-NCOA6 |
| XP_017132284.1 | TRADDN-NCOA6 | 2337 | LOC108149330              | hexapoda | Drosophila elegans      | PREDICTED: nuclear receptor coactivator 6 isoform X2 [Drosophila elegans]                                   | GCF_000224195.1 | TRADDN-NCOA6 |

| acc            | architecture | len  | gen.name                                | taxend   | species                        | define                                                                                                              | gca             | clade        |
|----------------|--------------|------|-----------------------------------------|----------|--------------------------------|---------------------------------------------------------------------------------------------------------------------|-----------------|--------------|
| XP_017132286.1 | TRADDN-NCOA6 | 2336 | LOC108149330                            | hexapoda | <i>Drosophila elegans</i>      | PREDICTED: nuclear receptor coactivator 6 isoform X3 [ <i>Drosophila elegans</i> ]                                  | GCF_000224195.1 | TRADDN-NCOA6 |
| XP_001968791.2 | TRADDN-NCOA6 | 2452 | dere_GLEANR_9049,GG24309                | hexapoda | <i>Drosophila erecta</i>       | LOW QUALITY PROTEIN: uncharacterized protein Dere_GG24309 [ <i>Drosophila erecta</i> ]                              | -               | TRADDN-NCOA6 |
| XP_017063177.1 | TRADDN-NCOA6 | 2239 | LOC108102587                            | hexapoda | <i>Drosophila eugracilis</i>   | PREDICTED: polyhomeotic-proximal chromatin protein isoform X1 [ <i>Drosophila eugracilis</i> ]                      | GCF_000236325.1 | TRADDN-NCOA6 |
| XP_017063178.1 | TRADDN-NCOA6 | 2238 | LOC108102587                            | hexapoda | <i>Drosophila eugracilis</i>   | PREDICTED: polyhomeotic-proximal chromatin protein isoform X2 [ <i>Drosophila eugracilis</i> ]                      | GCF_000236325.1 | TRADDN-NCOA6 |
| XP_017043850.1 | TRADDN-NCOA6 | 2318 | LOC108089891                            | hexapoda | <i>Drosophila ficusphila</i>   | PREDICTED: histone-lysine N-methyltransferase 2D isoform X1 [ <i>Drosophila ficusphila</i> ]                        | GCF_000220665.1 | TRADDN-NCOA6 |
| XP_017043851.1 | TRADDN-NCOA6 | 2317 | LOC108089891                            | hexapoda | <i>Drosophila ficusphila</i>   | PREDICTED: histone-lysine N-methyltransferase 2D isoform X2 [ <i>Drosophila ficusphila</i> ]                        | GCF_000220665.1 | TRADDN-NCOA6 |
| XP_001992910.1 | TRADDN-NCOA6 | 957  | dgri_GLEANR_13444,GH13537               | hexapoda | <i>Drosophila grimshawi</i>    | GH13537 [ <i>Drosophila grimshawi</i> ]                                                                             | GCF_000005155.2 | TRADDN-NCOA6 |
| XP_023177608.1 | TRADDN-NCOA6 | 2385 | LOC111603995                            | hexapoda | <i>Drosophila hydei</i>        | putative mediator of RNA polymerase II transcription subunit 26 [ <i>Drosophila hydei</i> ]                         | -               | TRADDN-NCOA6 |
| XP_017032055.1 | TRADDN-NCOA6 | 2266 | LOC108081407                            | hexapoda | <i>Drosophila kikkawai</i>     | PREDICTED: AF4/FMR2 family member 4 [ <i>Drosophila kikkawai</i> ]                                                  | GCF_000224215.1 | TRADDN-NCOA6 |
| NP_001097088.3 | TRADDN-NCOA6 | 2467 | CG14023,Dmel-CG14023,dNCOA6,NcoA6,NCOA6 | hexapoda | <i>Drosophila melanogaster</i> | nuclear receptor coactivator 6, isoform F [ <i>Drosophila melanogaster</i> ]                                        | -               | TRADDN-NCOA6 |
| NP_001245884.1 | TRADDN-NCOA6 | 2266 | CG14023,Dmel-CG14023,dNCOA6,NcoA6,NCOA6 | hexapoda | <i>Drosophila melanogaster</i> | nuclear receptor coactivator 6, isoform D [ <i>Drosophila melanogaster</i> ]                                        | -               | TRADDN-NCOA6 |
| NP_608921.3    | TRADDN-NCOA6 | 2265 | CG14023,Dmel-CG14023,dNCOA6,NcoA6,NCOA6 | hexapoda | <i>Drosophila melanogaster</i> | nuclear receptor coactivator 6, isoform C [ <i>Drosophila melanogaster</i> ]                                        | -               | TRADDN-NCOA6 |
| XP_017152980.1 | TRADDN-NCOA6 | 2390 | LOC108162657                            | hexapoda | <i>Drosophila miranda</i>      | PREDICTED: nuclear receptor coactivator 6-like [ <i>Drosophila miranda</i> ]                                        | GCF_000269505.1 | TRADDN-NCOA6 |
| XP_002002892.2 | TRADDN-NCOA6 | 2370 | dmoj_GLEANR_1047,GH10553                | hexapoda | <i>Drosophila mojavensis</i>   | uncharacterized protein Dmoj_GH10553 [ <i>Drosophila mojavensis</i> ]                                               | GCF_000005175.2 | TRADDN-NCOA6 |
| XP_017954029.1 | TRADDN-NCOA6 | 1557 | LOC108649574                            | hexapoda | <i>Drosophila navojoa</i>      | PREDICTED: putative mediator of RNA polymerase II transcription subunit 26 isoform X1 [ <i>Drosophila navojoa</i> ] | -               | TRADDN-NCOA6 |
| XP_017954030.1 | TRADDN-NCOA6 | 1400 | LOC108649574                            | hexapoda | <i>Drosophila navojoa</i>      | PREDICTED: putative mediator of RNA polymerase II transcription subunit 26 isoform X2 [ <i>Drosophila navojoa</i> ] | -               | TRADDN-NCOA6 |
| XP_022220919.1 | TRADDN-NCOA6 | 2425 | LOC111073094                            | hexapoda | <i>Drosophila obscura</i>      | AF4/FMR2 family member 4 [ <i>Drosophila obscura</i> ]                                                              | GCF_002217835.1 | TRADDN-NCOA6 |
| XP_002015177.1 | TRADDN-NCOA6 | 2373 | dper_GLEANR_20704,GL18557               | hexapoda | <i>Drosophila persimilis</i>   | GL18557 [ <i>Drosophila persimilis</i> ]                                                                            | -               | TRADDN-NCOA6 |

| acc            | architecture | len  | gen.name                  | taxend   | species                                                 | define                                                                                                                      | gca             | clade        |
|----------------|--------------|------|---------------------------|----------|---------------------------------------------------------|-----------------------------------------------------------------------------------------------------------------------------|-----------------|--------------|
| XP_002132783.2 | TRADDN-NCOA6 | 2618 | dpse_GLEANR_1839,GA25686  | hexapoda | <i>Drosophila pseudoobscura</i><br><i>pseudoobscura</i> | LOW QUALITY PROTEIN:<br>uncharacterized protein<br>Dpse_GA25686 [ <i>Drosophila</i><br><i>pseudoobscura pseudoobscura</i> ] | GCF_000001765.3 | TRADDN-NCOA6 |
| XP_016968921.1 | TRADDN-NCOA6 | 2276 | LOC108036999              | hexapoda | <i>Drosophila rhopaloa</i>                              | PREDICTED: nuclear receptor<br>coactivator 6 isoform X1 [ <i>Drosophila</i><br><i>rhopaloa</i> ]                            | GCF_000236305.1 | TRADDN-NCOA6 |
| XP_016968922.1 | TRADDN-NCOA6 | 2275 | LOC108036999              | hexapoda | <i>Drosophila rhopaloa</i>                              | PREDICTED: nuclear receptor<br>coactivator 6 isoform X2 [ <i>Drosophila</i><br><i>rhopaloa</i> ]                            | GCF_000236305.1 | TRADDN-NCOA6 |
| XP_002037942.1 | TRADDN-NCOA6 | 563  | dsec_GLEANR_19530,GM18027 | hexapoda | <i>Drosophila sechellia</i>                             | GM18027 [ <i>Drosophila sechellia</i> ]                                                                                     | GCF_000005215.3 | TRADDN-NCOA6 |
| XP_020800132.1 | TRADDN-NCOA6 | 1353 | LOC110177660              | hexapoda | <i>Drosophila serrata</i>                               | LOW QUALITY PROTEIN:<br>histone-lysine N-methyltransferase<br>2D-like, partial [ <i>Drosophila serrata</i> ]                | GCF_002093755.1 | TRADDN-NCOA6 |
| XP_020812428.1 | TRADDN-NCOA6 | 2494 | LOC110187381              | hexapoda | <i>Drosophila serrata</i>                               | LOW QUALITY PROTEIN:<br>uncharacterized protein<br>LOC110187381 [ <i>Drosophila serrata</i> ]                               | GCF_002093755.1 | TRADDN-NCOA6 |
| XP_016938638.1 | TRADDN-NCOA6 | 2282 | LOC108016483              | hexapoda | <i>Drosophila suzukii</i>                               | PREDICTED: histone-lysine<br>N-methyltransferase 2D isoform X1<br>[ <i>Drosophila suzukii</i> ]                             | GCF_000472105.1 | TRADDN-NCOA6 |
| XP_016938646.1 | TRADDN-NCOA6 | 2281 | LOC108016483              | hexapoda | <i>Drosophila suzukii</i>                               | PREDICTED: histone-lysine<br>N-methyltransferase 2D isoform X2<br>[ <i>Drosophila suzukii</i> ]                             | GCF_000472105.1 | TRADDN-NCOA6 |
| XP_017006613.1 | TRADDN-NCOA6 | 2182 | LOC108063861              | hexapoda | <i>Drosophila takahashii</i>                            | PREDICTED: nuclear receptor<br>coactivator 6 isoform X1 [ <i>Drosophila</i><br><i>takahashii</i> ]                          | GCF_000224235.1 | TRADDN-NCOA6 |
| XP_017006614.1 | TRADDN-NCOA6 | 2181 | LOC108063861              | hexapoda | <i>Drosophila takahashii</i>                            | PREDICTED: nuclear receptor<br>coactivator 6 isoform X2 [ <i>Drosophila</i><br><i>takahashii</i> ]                          | GCF_000224235.1 | TRADDN-NCOA6 |
| XP_002052423.2 | TRADDN-NCOA6 | 2306 | dvir_GLEANR_710,GJ21770   | hexapoda | <i>Drosophila virilis</i>                               | uncharacterized protein<br>Dvir_GJ21770 [ <i>Drosophila virilis</i> ]                                                       | GCF_000005245.1 | TRADDN-NCOA6 |
| EDW78155.2     | TRADDN-NCOA6 | 2157 | dwil_GLEANR_8984          | hexapoda | <i>Drosophila willistoni</i>                            | LOW QUALITY PROTEIN:<br>uncharacterized protein<br>Dwil_GK24846 [ <i>Drosophila</i><br><i>willistoni</i> ]                  | GCA_000005925.1 | TRADDN-NCOA6 |
| XP_023032478.1 | TRADDN-NCOA6 | 2307 | LOC6644292                | hexapoda | <i>Drosophila willistoni</i>                            | putative mediator of RNA<br>polymerase II transcription subunit<br>26 [ <i>Drosophila willistoni</i> ]                      | GCF_000005925.1 | TRADDN-NCOA6 |
| XP_002089227.2 | TRADDN-NCOA6 | 2438 | dyak_GLEANR_2784,GE19004  | hexapoda | <i>Drosophila yakuba</i>                                | LOW QUALITY PROTEIN:<br>uncharacterized protein<br>Dyak_GE19004 [ <i>Drosophila yakuba</i> ]                                | GCF_000005975.2 | TRADDN-NCOA6 |
| KZC12186.1     | TRADDN-NCOA6 | 2209 | WN55_03914                | hexapoda | <i>Dufourea novaeangliae</i>                            | Nuclear receptor coactivator 6<br>[ <i>Dufourea novaeangliae</i> ]                                                          | GCA_001272555.1 | TRADDN-NCOA6 |
| XP_015434572.1 | TRADDN-NCOA6 | 2226 | LOC107190297              | hexapoda | <i>Dufourea novaeangliae</i>                            | PREDICTED: uncharacterized<br>protein LOC107190297 isoform X1<br>[ <i>Dufourea novaeangliae</i> ]                           | GCF_001272555.1 | TRADDN-NCOA6 |
| XP_015434574.1 | TRADDN-NCOA6 | 2203 | LOC107190297              | hexapoda | <i>Dufourea novaeangliae</i>                            | PREDICTED: uncharacterized<br>protein LOC107190297 isoform X2<br>[ <i>Dufourea novaeangliae</i> ]                           | GCF_001272555.1 | TRADDN-NCOA6 |
| XP_015434575.1 | TRADDN-NCOA6 | 2189 | LOC107190297              | hexapoda | <i>Dufourea novaeangliae</i>                            | PREDICTED: uncharacterized<br>protein LOC107190297 isoform X3<br>[ <i>Dufourea novaeangliae</i> ]                           | GCF_001272555.1 | TRADDN-NCOA6 |

| acc            | architecture | len  | gen.name     | taxend   | species               | define                                                                                             | gca             | clade        |
|----------------|--------------|------|--------------|----------|-----------------------|----------------------------------------------------------------------------------------------------|-----------------|--------------|
| OAD53702.1     | TRADDN-NCOA6 | 2211 | WN48_09443   | hexapoda | Eufriesea mexicana    | Nuclear receptor coactivator 6 [Eufriesea mexicana]                                                | GCA_001483705.1 | TRADDN-NCOA6 |
| XP_017762430.1 | TRADDN-NCOA6 | 2249 | LOC108552415 | hexapoda | Eufriesea mexicana    | PREDICTED: uncharacterized protein LOC108552415 isoform X1 [Eufriesea mexicana]                    | GCF_001483705.1 | TRADDN-NCOA6 |
| XP_017762431.1 | TRADDN-NCOA6 | 2239 | LOC108552415 | hexapoda | Eufriesea mexicana    | PREDICTED: uncharacterized protein LOC108552415 isoform X2 [Eufriesea mexicana]                    | GCF_001483705.1 | TRADDN-NCOA6 |
| XP_017762432.1 | TRADDN-NCOA6 | 2225 | LOC108552415 | hexapoda | Eufriesea mexicana    | PREDICTED: uncharacterized protein LOC108552415 isoform X3 [Eufriesea mexicana]                    | GCF_001483705.1 | TRADDN-NCOA6 |
| OXA65226.1     | TRADDN-NCOA6 | 3667 | Fcan01_02940 | hexapoda | Folsomia candida      | Nuclear receptor coactivator 6 [Folsomia candida]                                                  | GCA_002217175.1 | TRADDN-NCOA6 |
| XP_021945657.1 | TRADDN-NCOA6 | 586  | LOC110843905 | hexapoda | Folsomia candida      | uncharacterized protein DDB_G0271670-like [Folsomia candida]                                       | GCF_002217175.1 | TRADDN-NCOA6 |
| XP_011296707.1 | TRADDN-NCOA6 | 2101 | LOC105262692 | hexapoda | Fopius arisanus       | PREDICTED: uncharacterized protein LOC105262692 isoform X1 [Fopius arisanus]                       | GCF_000806365.1 | TRADDN-NCOA6 |
| XP_011296708.1 | TRADDN-NCOA6 | 2100 | LOC105262692 | hexapoda | Fopius arisanus       | PREDICTED: uncharacterized protein LOC105262692 isoform X2 [Fopius arisanus]                       | GCF_000806365.1 | TRADDN-NCOA6 |
| XP_011296709.1 | TRADDN-NCOA6 | 2083 | LOC105262692 | hexapoda | Fopius arisanus       | PREDICTED: uncharacterized protein LOC105262692 isoform X3 [Fopius arisanus]                       | GCF_000806365.1 | TRADDN-NCOA6 |
| XP_011296710.1 | TRADDN-NCOA6 | 1949 | LOC105262692 | hexapoda | Fopius arisanus       | PREDICTED: uncharacterized protein LOC105262692 isoform X4 [Fopius arisanus]                       | GCF_000806365.1 | TRADDN-NCOA6 |
| XP_017793211.1 | TRADDN-NCOA6 | 2241 | LOC108575026 | hexapoda | Habropoda laboriosa   | PREDICTED: putative mediator of RNA polymerase II transcription subunit 26 [Habropoda laboriosa]   | GCF_001263275.1 | TRADDN-NCOA6 |
| XP_014294306.1 | TRADDN-NCOA6 | 811  | LOC106692715 | hexapoda | Halyomorpha halys     | bromodomain-containing protein 4-like isoform X2 [Halyomorpha halys]                               | GCF_000696795.2 | TRADDN-NCOA6 |
| XP_014294307.1 | TRADDN-NCOA6 | 806  | LOC106692715 | hexapoda | Halyomorpha halys     | uncharacterized protein KIAA1211-like isoform X3 [Halyomorpha halys]                               | GCF_000696795.2 | TRADDN-NCOA6 |
| XP_024219354.1 | TRADDN-NCOA6 | 812  | LOC106692715 | hexapoda | Halyomorpha halys     | uncharacterized protein KIAA1211-like isoform X1 [Halyomorpha halys]                               | GCF_000696795.2 | TRADDN-NCOA6 |
| XP_024219357.1 | TRADDN-NCOA6 | 769  | LOC106692715 | hexapoda | Halyomorpha halys     | bromodomain-containing protein 4-like isoform X4 [Halyomorpha halys]                               | GCF_000696795.2 | TRADDN-NCOA6 |
| EFN81453.1     | TRADDN-NCOA6 | 2218 | EAI_16623    | hexapoda | Harpegnathos saltator | Nuclear receptor coactivator 6 [Harpegnathos saltator]                                             | GCA_000147195.1 | TRADDN-NCOA6 |
| XP_011144197.2 | TRADDN-NCOA6 | 2234 | LOC105185988 | hexapoda | Harpegnathos saltator | putative mediator of RNA polymerase II transcription subunit 26 isoform X1 [Harpegnathos saltator] | GCF_003227715.1 | TRADDN-NCOA6 |



| acc            | architecture | len  | gen.name     | taxend   | species                   | define                                                                                              | gca             | clade        |
|----------------|--------------|------|--------------|----------|---------------------------|-----------------------------------------------------------------------------------------------------|-----------------|--------------|
| XP_011144200.2 | TRADDN-NCOA6 | 2098 | LOC105185988 | hexapoda | Harpegnathos saltator     | putative mediator of RNA polymerase II transcription subunit 26 isoform X6 [Harpegnathos saltator]  | GCF_003227715.1 | TRADDN-NCOA6 |
| XP_011144201.2 | TRADDN-NCOA6 | 2098 | LOC105185988 | hexapoda | Harpegnathos saltator     | putative mediator of RNA polymerase II transcription subunit 26 isoform X7 [Harpegnathos saltator]  | GCF_003227715.1 | TRADDN-NCOA6 |
| XP_019698285.2 | TRADDN-NCOA6 | 2232 | LOC105185988 | hexapoda | Harpegnathos saltator     | putative mediator of RNA polymerase II transcription subunit 26 isoform X2 [Harpegnathos saltator]  | GCF_003227715.1 | TRADDN-NCOA6 |
| XP_019698286.2 | TRADDN-NCOA6 | 2220 | LOC105185988 | hexapoda | Harpegnathos saltator     | putative mediator of RNA polymerase II transcription subunit 26 isoform X3 [Harpegnathos saltator]  | GCF_003227715.1 | TRADDN-NCOA6 |
| XP_019698287.2 | TRADDN-NCOA6 | 2096 | LOC105185988 | hexapoda | Harpegnathos saltator     | putative mediator of RNA polymerase II transcription subunit 26 isoform X8 [Harpegnathos saltator]  | GCF_003227715.1 | TRADDN-NCOA6 |
| XP_025160035.1 | TRADDN-NCOA6 | 2186 | LOC105185988 | hexapoda | Harpegnathos saltator     | putative mediator of RNA polymerase II transcription subunit 26 isoform X4 [Harpegnathos saltator]  | GCF_003227715.1 | TRADDN-NCOA6 |
| XP_025160036.1 | TRADDN-NCOA6 | 2140 | LOC105185988 | hexapoda | Harpegnathos saltator     | putative mediator of RNA polymerase II transcription subunit 26 isoform X5 [Harpegnathos saltator]  | GCF_003227715.1 | TRADDN-NCOA6 |
| XP_025160037.1 | TRADDN-NCOA6 | 2059 | LOC105185988 | hexapoda | Harpegnathos saltator     | putative mediator of RNA polymerase II transcription subunit 26 isoform X9 [Harpegnathos saltator]  | GCF_003227715.1 | TRADDN-NCOA6 |
| XP_025160039.1 | TRADDN-NCOA6 | 2050 | LOC105185988 | hexapoda | Harpegnathos saltator     | putative mediator of RNA polymerase II transcription subunit 26 isoform X10 [Harpegnathos saltator] | GCF_003227715.1 | TRADDN-NCOA6 |
| PZC73250.1     | TRADDN-NCOA6 | 1275 | HaOG209747   | hexapoda | Helicoverpa armigera      | hypothetical protein B5X24_HaOG209747 [Helicoverpa armigera]                                        | GCA_002156985.1 | TRADDN-NCOA6 |
| XP_021196522.1 | TRADDN-NCOA6 | 1292 | LOC110380753 | hexapoda | Helicoverpa armigera      | lysine-specific demethylase 6B-like [Helicoverpa armigera]                                          | GCF_002156985.1 | TRADDN-NCOA6 |
| PCG69216.1     | TRADDN-NCOA6 | 1428 | B5V51_4374   | hexapoda | Heliothis virescens       | hypothetical protein B5V51_4374 [Heliothis virescens]                                               | GCA_002382865.1 | TRADDN-NCOA6 |
| XP_023022070.1 | TRADDN-NCOA6 | 1483 | LOC111510398 | hexapoda | Leptinotarsa decemlineata | uncharacterized protein LOC111510398 [Leptinotarsa decemlineata]                                    | GCF_000500325.1 | TRADDN-NCOA6 |
| XP_012218728.1 | TRADDN-NCOA6 | 2335 | LOC105670024 | hexapoda | Linepithema humile        | PREDICTED: uncharacterized protein LOC105670024 isoform X1 [Linepithema humile]                     | GCF_000217595.1 | TRADDN-NCOA6 |
| XP_012218729.1 | TRADDN-NCOA6 | 2333 | LOC105670024 | hexapoda | Linepithema humile        | PREDICTED: uncharacterized protein LOC105670024 isoform X2 [Linepithema humile]                     | GCF_000217595.1 | TRADDN-NCOA6 |

| acc            | architecture | len  | gen.name     | taxend   | species                 | define                                                                                                       | gca             | clade        |
|----------------|--------------|------|--------------|----------|-------------------------|--------------------------------------------------------------------------------------------------------------|-----------------|--------------|
| XP_012218730.1 | TRADDN-NCOA6 | 2333 | LOC105670024 | hexapoda | Linepithema humile      | PREDICTED: uncharacterized protein LOC105670024 isoform X3 [Linepithema humile]                              | GCF_000217595.1 | TRADDN-NCOA6 |
| XP_012218731.1 | TRADDN-NCOA6 | 2287 | LOC105670024 | hexapoda | Linepithema humile      | PREDICTED: uncharacterized protein LOC105670024 isoform X4 [Linepithema humile]                              | GCF_000217595.1 | TRADDN-NCOA6 |
| XP_012218732.1 | TRADDN-NCOA6 | 2081 | LOC105670024 | hexapoda | Linepithema humile      | PREDICTED: uncharacterized protein LOC105670024 isoform X5 [Linepithema humile]                              | GCF_000217595.1 | TRADDN-NCOA6 |
| KNC28988.1     | TRADDN-NCOA6 | 3078 | FF38_00661   | hexapoda | Lucilia cuprina         | hypothetical protein FF38_00661 [Lucilia cuprina]                                                            | GCA_001187945.1 | TRADDN-NCOA6 |
| XP_023298934.1 | TRADDN-NCOA6 | 2719 | LOC111681399 | hexapoda | Lucilia cuprina         | uncharacterized protein LOC111681399 isoform X1 [Lucilia cuprina]                                            | GCF_000699065.1 | TRADDN-NCOA6 |
| XP_023298935.1 | TRADDN-NCOA6 | 2718 | LOC111681399 | hexapoda | Lucilia cuprina         | uncharacterized protein LOC111681399 isoform X2 [Lucilia cuprina]                                            | GCF_000699065.1 | TRADDN-NCOA6 |
| XP_012146297.1 | TRADDN-NCOA6 | 2229 | LOC100875083 | hexapoda | Megachile rotundata     | PREDICTED: uncharacterized protein LOC100875083 isoform X3 [Megachile rotundata]                             | GCF_000220905.1 | TRADDN-NCOA6 |
| XP_012146298.1 | TRADDN-NCOA6 | 2227 | LOC100875083 | hexapoda | Megachile rotundata     | PREDICTED: uncharacterized protein LOC100875083 isoform X4 [Megachile rotundata]                             | GCF_000220905.1 | TRADDN-NCOA6 |
| XP_012146299.1 | TRADDN-NCOA6 | 2218 | LOC100875083 | hexapoda | Megachile rotundata     | PREDICTED: uncharacterized protein LOC100875083 isoform X5 [Megachile rotundata]                             | GCF_000220905.1 | TRADDN-NCOA6 |
| XP_012146300.1 | TRADDN-NCOA6 | 2215 | LOC100875083 | hexapoda | Megachile rotundata     | PREDICTED: uncharacterized protein LOC100875083 isoform X6 [Megachile rotundata]                             | GCF_000220905.1 | TRADDN-NCOA6 |
| XP_012146301.1 | TRADDN-NCOA6 | 2206 | LOC100875083 | hexapoda | Megachile rotundata     | PREDICTED: uncharacterized protein LOC100875083 isoform X7 [Megachile rotundata]                             | GCF_000220905.1 | TRADDN-NCOA6 |
| XP_012146302.1 | TRADDN-NCOA6 | 2074 | LOC100875083 | hexapoda | Megachile rotundata     | PREDICTED: uncharacterized protein LOC100875083 isoform X8 [Megachile rotundata]                             | GCF_000220905.1 | TRADDN-NCOA6 |
| XP_025201013.1 | TRADDN-NCOA6 | 1507 | LOC112598690 | hexapoda | Melanaphis sacchari     | uncharacterized protein LOC112598690 isoform X1 [Melanaphis sacchari]                                        | GCF_002803265.2 | TRADDN-NCOA6 |
| XP_025201014.1 | TRADDN-NCOA6 | 1505 | LOC112598690 | hexapoda | Melanaphis sacchari     | uncharacterized protein LOC112598690 isoform X2 [Melanaphis sacchari]                                        | GCF_002803265.2 | TRADDN-NCOA6 |
| XP_025201015.1 | TRADDN-NCOA6 | 1471 | LOC112598690 | hexapoda | Melanaphis sacchari     | uncharacterized protein LOC112598690 isoform X3 [Melanaphis sacchari]                                        | GCF_002803265.2 | TRADDN-NCOA6 |
| KOX76309.1     | TRADDN-NCOA6 | 2210 | WN51_11640   | hexapoda | Melipona quadrifasciata | Nuclear receptor coactivator 6 [Melipona quadrifasciata]                                                     | GCA_001276565.1 | TRADDN-NCOA6 |
| XP_008546152.1 | TRADDN-NCOA6 | 2440 | LOC103570246 | hexapoda | Microplitis demolitor   | PREDICTED: serine-rich adhesin for platelets [Microplitis demolitor]                                         | GCF_000572035.2 | TRADDN-NCOA6 |
| XP_012540715.1 | TRADDN-NCOA6 | 2324 | LOC105839161 | hexapoda | Monomorium pharaonis    | PREDICTED: putative mediator of RNA polymerase II transcription subunit 26 isoform X1 [Monomorium pharaonis] | GCF_003260585.2 | TRADDN-NCOA6 |

| acc            | architecture | len  | gen.name     | taxend   | species                  | define                                                                                                                | gca             | clade        |
|----------------|--------------|------|--------------|----------|--------------------------|-----------------------------------------------------------------------------------------------------------------------|-----------------|--------------|
| XP_012540716.1 | TRADDN-NCOA6 | 2313 | LOC105839161 | hexapoda | Monomorium pharaonis     | PREDICTED: putative mediator of RNA polymerase II transcription subunit 26 isoform X2 [Monomorium pharaonis]          | GCF_003260585.2 | TRADDN-NCOA6 |
| XP_012540717.1 | TRADDN-NCOA6 | 2276 | LOC105839161 | hexapoda | Monomorium pharaonis     | PREDICTED: bromodomain-containing protein DDB_G0270170 isoform X3 [Monomorium pharaonis]                              | GCF_003260585.2 | TRADDN-NCOA6 |
| XP_012540718.1 | TRADDN-NCOA6 | 2117 | LOC105839161 | hexapoda | Monomorium pharaonis     | PREDICTED: putative mediator of RNA polymerase II transcription subunit 26 isoform X4 [Monomorium pharaonis]          | GCF_003260585.2 | TRADDN-NCOA6 |
| XP_012540720.1 | TRADDN-NCOA6 | 2089 | LOC105839161 | hexapoda | Monomorium pharaonis     | PREDICTED: putative mediator of RNA polymerase II transcription subunit 26 isoform X5 [Monomorium pharaonis]          | -               | TRADDN-NCOA6 |
| XP_012540721.1 | TRADDN-NCOA6 | 2078 | LOC105839161 | hexapoda | Monomorium pharaonis     | PREDICTED: putative mediator of RNA polymerase II transcription subunit 26 isoform X6 [Monomorium pharaonis]          | GCF_003260585.2 | TRADDN-NCOA6 |
| XP_011290982.1 | TRADDN-NCOA6 | 2921 | LOC101901121 | hexapoda | Musca domestica          | PREDICTED: uncharacterized protein LOC101901121 isoform X1 [Musca domestica]                                          | GCF_000371365.1 | TRADDN-NCOA6 |
| XP_011290985.1 | TRADDN-NCOA6 | 2919 | LOC101901121 | hexapoda | Musca domestica          | PREDICTED: uncharacterized protein LOC101901121 isoform X2 [Musca domestica]                                          | GCF_000371365.1 | TRADDN-NCOA6 |
| XP_019891079.1 | TRADDN-NCOA6 | 2918 | LOC101901121 | hexapoda | Musca domestica          | PREDICTED: uncharacterized protein LOC101901121 isoform X3 [Musca domestica]                                          | GCF_000371365.1 | TRADDN-NCOA6 |
| XP_022172572.1 | TRADDN-NCOA6 | 1508 | LOC111035313 | hexapoda | Myzus persicae           | uncharacterized protein LOC111035313 isoform X1 [Myzus persicae]                                                      | GCF_001856785.1 | TRADDN-NCOA6 |
| XP_022172573.1 | TRADDN-NCOA6 | 1506 | LOC111035313 | hexapoda | Myzus persicae           | uncharacterized protein LOC111035313 isoform X2 [Myzus persicae]                                                      | GCF_001856785.1 | TRADDN-NCOA6 |
| XP_022172574.1 | TRADDN-NCOA6 | 1472 | LOC111035313 | hexapoda | Myzus persicae           | uncharacterized protein LOC111035313 isoform X3 [Myzus persicae]                                                      | GCF_001856785.1 | TRADDN-NCOA6 |
| XP_008204160.2 | TRADDN-NCOA6 | 2524 | LOC100679897 | hexapoda | Nasonia vitripennis      | PREDICTED: LOW QUALITY PROTEIN: putative mediator of RNA polymerase II transcription subunit 26 [Nasonia vitripennis] | GCF_000002325.3 | TRADDN-NCOA6 |
| XP_015524592.1 | TRADDN-NCOA6 | 2227 | LOC107227844 | hexapoda | Neodiprion lecontei      | PREDICTED: uncharacterized protein LOC107227844 [Neodiprion lecontei]                                                 | GCF_001263575.1 | TRADDN-NCOA6 |
| XP_017771567.1 | TRADDN-NCOA6 | 1402 | LOC108558972 | hexapoda | Nicrophorus vespilloides | PREDICTED: serine-rich adhesin for platelets [Nicrophorus vespilloides]                                               | GCF_001412225.1 | TRADDN-NCOA6 |
| XP_022199641.1 | TRADDN-NCOA6 | 2166 | LOC111056571 | hexapoda | Nilaparvata lugens       | uncharacterized protein LOC111056571 [Nilaparvata lugens]                                                             | GCF_000757685.1 | TRADDN-NCOA6 |

| acc            | architecture | len  | gen.name        | taxend   | species                    | define                                                                      | gca             | clade        |
|----------------|--------------|------|-----------------|----------|----------------------------|-----------------------------------------------------------------------------|-----------------|--------------|
| XP_022904603.1 | TRADDN-NCOA6 | 1207 | LOC111416741    | hexapoda | Onthophagus taurus         | uncharacterized protein LOC111416741 [Onthophagus taurus]                   | GCF_000648695.1 | TRADDN-NCOA6 |
| XP_011335995.1 | TRADDN-NCOA6 | 2363 | LOC105278539    | hexapoda | Ooceraea biroi             | PREDICTED: uncharacterized protein LOC105278539 isoform X1 [Ooceraea biroi] | -               | TRADDN-NCOA6 |
| XP_011335997.1 | TRADDN-NCOA6 | 2315 | LOC105278539    | hexapoda | Ooceraea biroi             | PREDICTED: uncharacterized protein LOC105278539 isoform X2 [Ooceraea biroi] | -               | TRADDN-NCOA6 |
| XP_011335998.1 | TRADDN-NCOA6 | 2148 | LOC105278539    | hexapoda | Ooceraea biroi             | PREDICTED: uncharacterized protein LOC105278539 isoform X4 [Ooceraea biroi] | -               | TRADDN-NCOA6 |
| XP_011335999.1 | TRADDN-NCOA6 | 2100 | LOC105278539    | hexapoda | Ooceraea biroi             | PREDICTED: uncharacterized protein LOC105278539 isoform X6 [Ooceraea biroi] | -               | TRADDN-NCOA6 |
| XP_019886915.1 | TRADDN-NCOA6 | 2170 | LOC105278539    | hexapoda | Ooceraea biroi             | PREDICTED: uncharacterized protein LOC105278539 isoform X3 [Ooceraea biroi] | -               | TRADDN-NCOA6 |
| XP_019886916.1 | TRADDN-NCOA6 | 2139 | LOC105278539    | hexapoda | Ooceraea biroi             | PREDICTED: uncharacterized protein LOC105278539 isoform X5 [Ooceraea biroi] | -               | TRADDN-NCOA6 |
| KOB68708.1     | TRADDN-NCOA6 | 135  | OBRU01_17957    | hexapoda | Operophtera brumata        | Nuclear receptor coactivator 6 [Operophtera brumata]                        | GCA_001266575.1 | TRADDN-NCOA6 |
| XP_012272747.1 | TRADDN-NCOA6 | 2131 | LOC105695604    | hexapoda | Orussus abietinus          | uncharacterized protein LOC105695604 isoform X1 [Orussus abietinus]         | GCF_000612105.2 | TRADDN-NCOA6 |
| XP_012272756.1 | TRADDN-NCOA6 | 2128 | LOC105695604    | hexapoda | Orussus abietinus          | uncharacterized protein LOC105695604 isoform X2 [Orussus abietinus]         | GCF_000612105.2 | TRADDN-NCOA6 |
| XP_012272776.1 | TRADDN-NCOA6 | 2121 | LOC105695604    | hexapoda | Orussus abietinus          | uncharacterized protein LOC105695604 isoform X3 [Orussus abietinus]         | GCF_000612105.2 | TRADDN-NCOA6 |
| XP_012272784.1 | TRADDN-NCOA6 | 2083 | LOC105695604    | hexapoda | Orussus abietinus          | uncharacterized protein LOC105695604 isoform X4 [Orussus abietinus]         | GCF_000612105.2 | TRADDN-NCOA6 |
| KRT82121.1     | TRADDN-NCOA6 | 1458 | AMK59_3368      | hexapoda | Oryctes borbonicus         | hypothetical protein AMK59_3368 [Oryctes borbonicus]                        | GCA_001443705.1 | TRADDN-NCOA6 |
| KPJ07754.1     | TRADDN-NCOA6 | 1730 | RR48_11310      | hexapoda | Papilio machaon            | Nuclear receptor coactivator 6 [Papilio machaon]                            | GCA_001298355.1 | TRADDN-NCOA6 |
| XP_014368318.1 | TRADDN-NCOA6 | 1744 | LOC106718680    | hexapoda | Papilio machaon            | PREDICTED: uncharacterized protein LOC106718680 [Papilio machaon]           | GCF_001298355.1 | TRADDN-NCOA6 |
| XP_013137855.1 | TRADDN-NCOA6 | 1388 | LOC106102816    | hexapoda | Papilio polytes            | PREDICTED: uncharacterized protein LOC106102816 [Papilio polytes]           | GCF_000836215.1 | TRADDN-NCOA6 |
| KPJ04213.1     | TRADDN-NCOA6 | 1637 | RR46_07972      | hexapoda | Papilio xuthus             | Nuclear receptor coactivator 6 [Papilio xuthus]                             | GCA_001298345.1 | TRADDN-NCOA6 |
| XP_013180482.1 | TRADDN-NCOA6 | 1741 | LOC106127046    | hexapoda | Papilio xuthus             | PREDICTED: protein piccolo [Papilio xuthus]                                 | GCF_000836235.1 | TRADDN-NCOA6 |
| XP_002431865.1 | TRADDN-NCOA6 | 1870 | Phum_PHUM551970 | hexapoda | Pediculus humanus corporis | conserved hypothetical protein [Pediculus humanus corporis]                 | GCF_000006295.1 | TRADDN-NCOA6 |

| acc            | architecture | len  | gen.name     | taxend   | species               | define                                                                                                    | gca             | clade        |
|----------------|--------------|------|--------------|----------|-----------------------|-----------------------------------------------------------------------------------------------------------|-----------------|--------------|
| XP_022120368.1 | TRADDN-NCOA6 | 1581 | LOC110996820 | hexapoda | Pieris rapae          | protein piccolo-like isoform X1 [Pieris rapae]                                                            | GCF_001856805.1 | TRADDN-NCOA6 |
| XP_022120369.1 | TRADDN-NCOA6 | 1579 | LOC110996820 | hexapoda | Pieris rapae          | protein piccolo-like isoform X2 [Pieris rapae]                                                            | GCF_001856805.1 | TRADDN-NCOA6 |
| XP_011560880.1 | TRADDN-NCOA6 | 920  | LOC105391148 | hexapoda | Plutella xylostella   | PREDICTED: serine/arginine repetitive matrix protein 1-like, partial [Plutella xylostella]                | GCF_000330985.1 | TRADDN-NCOA6 |
| XP_011645748.1 | TRADDN-NCOA6 | 2321 | LOC105432581 | hexapoda | Pogonomyrmex barbatus | uncharacterized protein LOC105432581 isoform X1 [Pogonomyrmex barbatus]                                   | GCF_000187915.1 | TRADDN-NCOA6 |
| XP_011645750.1 | TRADDN-NCOA6 | 2089 | LOC105432581 | hexapoda | Pogonomyrmex barbatus | uncharacterized protein LOC105432581 isoform X2 [Pogonomyrmex barbatus]                                   | GCF_000187915.1 | TRADDN-NCOA6 |
| XP_014604298.1 | TRADDN-NCOA6 | 2256 | LOC106786918 | hexapoda | Polistes canadensis   | PREDICTED: uncharacterized protein LOC106786918 isoform X1 [Polistes canadensis]                          | GCF_001313835.1 | TRADDN-NCOA6 |
| XP_014604299.1 | TRADDN-NCOA6 | 2242 | LOC106786918 | hexapoda | Polistes canadensis   | PREDICTED: uncharacterized protein LOC106786918 isoform X2 [Polistes canadensis]                          | GCF_001313835.1 | TRADDN-NCOA6 |
| XP_014604300.1 | TRADDN-NCOA6 | 2233 | LOC106786918 | hexapoda | Polistes canadensis   | PREDICTED: uncharacterized protein LOC106786918 isoform X3 [Polistes canadensis]                          | GCF_001313835.1 | TRADDN-NCOA6 |
| XP_014604301.1 | TRADDN-NCOA6 | 2214 | LOC106786918 | hexapoda | Polistes canadensis   | PREDICTED: uncharacterized protein LOC106786918 isoform X4 [Polistes canadensis]                          | GCF_001313835.1 | TRADDN-NCOA6 |
| XP_015186754.1 | TRADDN-NCOA6 | 2278 | LOC107071869 | hexapoda | Polistes dominula     | PREDICTED: putative mediator of RNA polymerase II transcription subunit 26 isoform X1 [Polistes dominula] | GCF_001465965.1 | TRADDN-NCOA6 |
| XP_015186755.1 | TRADDN-NCOA6 | 2264 | LOC107071869 | hexapoda | Polistes dominula     | PREDICTED: putative mediator of RNA polymerase II transcription subunit 26 isoform X2 [Polistes dominula] | GCF_001465965.1 | TRADDN-NCOA6 |
| XP_015186756.1 | TRADDN-NCOA6 | 2255 | LOC107071869 | hexapoda | Polistes dominula     | PREDICTED: putative mediator of RNA polymerase II transcription subunit 26 isoform X3 [Polistes dominula] | GCF_001465965.1 | TRADDN-NCOA6 |
| XP_015186757.1 | TRADDN-NCOA6 | 2236 | LOC107071869 | hexapoda | Polistes dominula     | PREDICTED: putative mediator of RNA polymerase II transcription subunit 26 isoform X4 [Polistes dominula] | GCF_001465965.1 | TRADDN-NCOA6 |
| XP_020295483.1 | TRADDN-NCOA6 | 2301 | LOC109860653 | hexapoda | Pseudomyrmex gracilis | uncharacterized protein LOC109860653 isoform X1 [Pseudomyrmex gracilis]                                   | GCF_002006095.1 | TRADDN-NCOA6 |
| XP_020295484.1 | TRADDN-NCOA6 | 2284 | LOC109860653 | hexapoda | Pseudomyrmex gracilis | uncharacterized protein LOC109860653 isoform X2 [Pseudomyrmex gracilis]                                   | GCF_002006095.1 | TRADDN-NCOA6 |
| XP_017467919.1 | TRADDN-NCOA6 | 2337 | LOC108360220 | hexapoda | Rhagoletis zephyria   | PREDICTED: uncharacterized protein LOC108360220 isoform X1 [Rhagoletis zephyria]                          | GCF_001687245.1 | TRADDN-NCOA6 |

| acc            | architecture | len  | gen.name     | taxend   | species                   | define                                                                                           | gca             | clade        |
|----------------|--------------|------|--------------|----------|---------------------------|--------------------------------------------------------------------------------------------------|-----------------|--------------|
| XP_017467920.1 | TRADDN-NCOA6 | 2336 | LOC108360220 | hexapoda | Rhagoletis zephyria       | PREDICTED: uncharacterized protein LOC108360220 isoform X2 [Rhagoletis zephyria]                 | GCF_001687245.1 | TRADDN-NCOA6 |
| XP_017467921.1 | TRADDN-NCOA6 | 2298 | LOC108360220 | hexapoda | Rhagoletis zephyria       | PREDICTED: uncharacterized protein LOC108360220 isoform X3 [Rhagoletis zephyria]                 | GCF_001687245.1 | TRADDN-NCOA6 |
| XP_025407016.1 | TRADDN-NCOA6 | 1520 | LOC112680973 | hexapoda | Sipha flava               | uncharacterized protein LOC112680973 isoform X1 [Sipha flava]                                    | GCF_003268045.1 | TRADDN-NCOA6 |
| XP_025407019.1 | TRADDN-NCOA6 | 1507 | LOC112680973 | hexapoda | Sipha flava               | uncharacterized protein LOC112680973 isoform X2 [Sipha flava]                                    | GCF_003268045.1 | TRADDN-NCOA6 |
| XP_025407020.1 | TRADDN-NCOA6 | 1484 | LOC112680973 | hexapoda | Sipha flava               | uncharacterized protein LOC112680973 isoform X3 [Sipha flava]                                    | GCF_003268045.1 | TRADDN-NCOA6 |
| EFZ13556.1     | TRADDN-NCOA6 | 2103 | SINV_09701   | hexapoda | Solenopsis invicta        | hypothetical protein SINV_09701, partial [Solenopsis invicta]                                    | -               | TRADDN-NCOA6 |
| XP_011166780.1 | TRADDN-NCOA6 | 2250 | LOC105200769 | hexapoda | Solenopsis invicta        | PREDICTED: putative mediator of RNA polymerase II transcription subunit 26 [Solenopsis invicta]  | -               | TRADDN-NCOA6 |
| XP_022818643.1 | TRADDN-NCOA6 | 1402 | LOC111351105 | hexapoda | Spodoptera litura         | uncharacterized protein LOC111351105, partial [Spodoptera litura]                                | GCF_002706865.1 | TRADDN-NCOA6 |
| XP_013107027.1 | TRADDN-NCOA6 | 2568 | LOC106086772 | hexapoda | Stomoxys calcitrans       | PREDICTED: putative mediator of RNA polymerase II transcription subunit 26 [Stomoxys calcitrans] | GCF_001015335.1 | TRADDN-NCOA6 |
| XP_024876013.1 | TRADDN-NCOA6 | 2302 | LOC112457301 | hexapoda | Temnothorax curvispinosus | uncharacterized protein LOC112457301 isoform X1 [Temnothorax curvispinosus]                      | GCF_003070985.1 | TRADDN-NCOA6 |
| XP_024876014.1 | TRADDN-NCOA6 | 2300 | LOC112457301 | hexapoda | Temnothorax curvispinosus | uncharacterized protein LOC112457301 isoform X2 [Temnothorax curvispinosus]                      | GCF_003070985.1 | TRADDN-NCOA6 |
| XP_024876016.1 | TRADDN-NCOA6 | 2291 | LOC112457301 | hexapoda | Temnothorax curvispinosus | uncharacterized protein LOC112457301 isoform X3 [Temnothorax curvispinosus]                      | GCF_003070985.1 | TRADDN-NCOA6 |
| XP_024876017.1 | TRADDN-NCOA6 | 2254 | LOC112457301 | hexapoda | Temnothorax curvispinosus | uncharacterized protein LOC112457301 isoform X4 [Temnothorax curvispinosus]                      | GCF_003070985.1 | TRADDN-NCOA6 |
| XP_024876018.1 | TRADDN-NCOA6 | 2102 | LOC112457301 | hexapoda | Temnothorax curvispinosus | uncharacterized protein LOC112457301 isoform X5 [Temnothorax curvispinosus]                      | GCF_003070985.1 | TRADDN-NCOA6 |
| XP_024876019.1 | TRADDN-NCOA6 | 2063 | LOC112457301 | hexapoda | Temnothorax curvispinosus | uncharacterized protein LOC112457301 isoform X6 [Temnothorax curvispinosus]                      | GCF_003070985.1 | TRADDN-NCOA6 |
| XP_018359436.1 | TRADDN-NCOA6 | 2308 | LOC108758802 | hexapoda | Trachymyrmex cornetzi     | PREDICTED: serine-rich adhesin for platelets-like isoform X1 [Trachymyrmex cornetzi]             | GCF_001594075.1 | TRADDN-NCOA6 |
| XP_018359438.1 | TRADDN-NCOA6 | 2297 | LOC108758802 | hexapoda | Trachymyrmex cornetzi     | PREDICTED: serine-rich adhesin for platelets-like isoform X2 [Trachymyrmex cornetzi]             | GCF_001594075.1 | TRADDN-NCOA6 |

| acc            | architecture | len  | gen.name     | taxend   | species                      | define                                                                                                               | gca             | clade        |
|----------------|--------------|------|--------------|----------|------------------------------|----------------------------------------------------------------------------------------------------------------------|-----------------|--------------|
| XP_018359440.1 | TRADDN-NCOA6 | 2260 | LOC108758802 | hexapoda | Trachymyrmex cornetzi        | PREDICTED: serine-rich adhesin for platelets-like isoform X3 [Trachymyrmex cornetzi]                                 | GCF_001594075.1 | TRADDN-NCOA6 |
| XP_018359441.1 | TRADDN-NCOA6 | 2091 | LOC108758802 | hexapoda | Trachymyrmex cornetzi        | PREDICTED: putative mediator of RNA polymerase II transcription subunit 26 isoform X4 [Trachymyrmex cornetzi]        | GCF_001594075.1 | TRADDN-NCOA6 |
| KYN32003.1     | TRADDN-NCOA6 | 2254 | ALC56_13756  | hexapoda | Trachymyrmex septentrionalis | Nuclear receptor coactivator 6 [Trachymyrmex septentrionalis]                                                        | GCA_001594115.1 | TRADDN-NCOA6 |
| XP_018353001.1 | TRADDN-NCOA6 | 2291 | LOC108754868 | hexapoda | Trachymyrmex septentrionalis | PREDICTED: serine-rich adhesin for platelets-like isoform X1 [Trachymyrmex septentrionalis]                          | GCF_001594115.1 | TRADDN-NCOA6 |
| XP_018353002.1 | TRADDN-NCOA6 | 2280 | LOC108754868 | hexapoda | Trachymyrmex septentrionalis | PREDICTED: serine-rich adhesin for platelets-like isoform X2 [Trachymyrmex septentrionalis]                          | GCF_001594115.1 | TRADDN-NCOA6 |
| XP_018353003.1 | TRADDN-NCOA6 | 2243 | LOC108754868 | hexapoda | Trachymyrmex septentrionalis | PREDICTED: serine-rich adhesin for platelets-like isoform X3 [Trachymyrmex septentrionalis]                          | GCF_001594115.1 | TRADDN-NCOA6 |
| XP_018353004.1 | TRADDN-NCOA6 | 2084 | LOC108754868 | hexapoda | Trachymyrmex septentrionalis | PREDICTED: putative mediator of RNA polymerase II transcription subunit 26 isoform X4 [Trachymyrmex septentrionalis] | GCF_001594115.1 | TRADDN-NCOA6 |
| KYQ49864.1     | TRADDN-NCOA6 | 2203 | ALC60_11039  | hexapoda | Trachymyrmex zeteki          | Nuclear receptor coactivator 6 [Trachymyrmex zeteki]                                                                 | GCA_001594055.1 | TRADDN-NCOA6 |
| XP_018311426.1 | TRADDN-NCOA6 | 2299 | LOC108727714 | hexapoda | Trachymyrmex zeteki          | PREDICTED: serine-rich adhesin for platelets-like isoform X1 [Trachymyrmex zeteki]                                   | GCF_001594055.1 | TRADDN-NCOA6 |
| XP_018311428.1 | TRADDN-NCOA6 | 2288 | LOC108727714 | hexapoda | Trachymyrmex zeteki          | PREDICTED: serine-rich adhesin for platelets-like isoform X2 [Trachymyrmex zeteki]                                   | GCF_001594055.1 | TRADDN-NCOA6 |
| XP_018311429.1 | TRADDN-NCOA6 | 2252 | LOC108727714 | hexapoda | Trachymyrmex zeteki          | PREDICTED: serine-rich adhesin for platelets-like isoform X3 [Trachymyrmex zeteki]                                   | GCF_001594055.1 | TRADDN-NCOA6 |
| XP_018311430.1 | TRADDN-NCOA6 | 2090 | LOC108727714 | hexapoda | Trachymyrmex zeteki          | PREDICTED: putative mediator of RNA polymerase II transcription subunit 26 isoform X4 [Trachymyrmex zeteki]          | GCF_001594055.1 | TRADDN-NCOA6 |
| XP_008195092.1 | TRADDN-NCOA6 | 1139 | LOC656611    | hexapoda | Tribolium castaneum          | PREDICTED: uncharacterized protein LOC656611 [Tribolium castaneum]                                                   | GCF_000002335.3 | TRADDN-NCOA6 |
| XP_023315366.1 | TRADDN-NCOA6 | 2477 | LOC106648493 | hexapoda | Trichogramma pretiosum       | uncharacterized protein LOC106648493 [Trichogramma pretiosum]                                                        | GCF_000599845.2 | TRADDN-NCOA6 |
| OXU20663.1     | TRADDN-NCOA6 | 2706 | TSAR_004647  | hexapoda | Trichomalopsis sarcophagae   | hypothetical protein TSAR_004647 [Trichomalopsis sarcophagae]                                                        | GCA_002249905.1 | TRADDN-NCOA6 |
| XP_011863875.1 | TRADDN-NCOA6 | 2331 | LOC105559864 | hexapoda | Vollenhovia emeryi           | PREDICTED: putative mediator of RNA polymerase II transcription subunit 26 [Vollenhovia emeryi]                      | GCF_000949405.1 | TRADDN-NCOA6 |
| XP_011694201.1 | TRADDN-NCOA6 | 2310 | LOC105453719 | hexapoda | Wasmannia auropunctata       | PREDICTED: putative mediator of RNA polymerase II transcription subunit 26 isoform X1 [Wasmannia auropunctata]       | GCF_000956235.1 | TRADDN-NCOA6 |

| acc            | architecture                                              | len  | gen.name     | taxend   | species                 | define                                                                                                         | gca             | clade        |
|----------------|-----------------------------------------------------------|------|--------------|----------|-------------------------|----------------------------------------------------------------------------------------------------------------|-----------------|--------------|
| XP_011694202.1 | TRADDN-NCOA6                                              | 2307 | LOC105453719 | hexapoda | Wasmannia auropunctata  | PREDICTED: putative mediator of RNA polymerase II transcription subunit 26 isoform X2 [Wasmannia auropunctata] | GCF_000956235.1 | TRADDN-NCOA6 |
| XP_011694203.1 | TRADDN-NCOA6                                              | 2099 | LOC105453719 | hexapoda | Wasmannia auropunctata  | PREDICTED: putative mediator of RNA polymerase II transcription subunit 26 isoform X3 [Wasmannia auropunctata] | GCF_000956235.1 | TRADDN-NCOA6 |
| XP_011694204.1 | TRADDN-NCOA6                                              | 2299 | LOC105453719 | hexapoda | Wasmannia auropunctata  | PREDICTED: putative mediator of RNA polymerase II transcription subunit 26 isoform X4 [Wasmannia auropunctata] | GCF_000956235.1 | TRADDN-NCOA6 |
| XP_011194615.1 | TRADDN-NCOA6                                              | 2434 | LOC105219952 | hexapoda | Zeugodacus cucurbitae   | PREDICTED: nuclear receptor coactivator 6 [Zeugodacus cucurbitae]                                              | GCF_000806345.1 | TRADDN-NCOA6 |
| XP_021935501.1 | TRADDN-NCOA6                                              | 2715 | LOC110837561 | hexapoda | Zootermopsis nevadensis | mucin-5AC-like [Zootermopsis nevadensis]                                                                       | GCF_000696155.1 | TRADDN-NCOA6 |
| EGI60794.1     | TRADDN-NCOA6+KH                                           | 2409 | G5I_10992    | hexapoda | Acromyrmex echinatio    | RNA-binding protein pno1 [Acromyrmex echinatio]                                                                | GCA_000204515.1 | TRADDN-NCOA6 |
| XP_012351037.1 | TRADDN-NCOA6+KH                                           | 2447 | LOC100870488 | hexapoda | Apis florea             | PREDICTED: LOW QUALITY PROTEIN: uncharacterized protein LOC100870488 [Apis florea]                             | GCF_000184785.2 | TRADDN-NCOA6 |
| KOC62415.1     | TRADDN-NCOA6+KH                                           | 2448 | WH47_03828   | hexapoda | Habropoda laboriosa     | RNA-binding protein pno1 [Habropoda laboriosa]                                                                 | GCA_001263275.1 | TRADDN-NCOA6 |
| XP_012146292.1 | TRADDN-NCOA6+KH                                           | 2446 | LOC100875083 | hexapoda | Megachile rotundata     | PREDICTED: uncharacterized protein LOC100875083 isoform X1 [Megachile rotundata]                               | GCF_000220905.1 | TRADDN-NCOA6 |
| XP_012146296.1 | TRADDN-NCOA6+KH                                           | 2423 | LOC100875083 | hexapoda | Megachile rotundata     | PREDICTED: uncharacterized protein LOC100875083 isoform X2 [Megachile rotundata]                               | GCF_000220905.1 | TRADDN-NCOA6 |
| EZA56195.1     | TRADDN-NCOA6+KH                                           | 2460 | X777_03527   | hexapoda | Ooceraea biroi          | RNA-binding protein pno1 [Ooceraea biroi]                                                                      | GCA_000611835.1 | TRADDN-NCOA6 |
| KYN23013.1     | TRADDN-NCOA6+KH                                           | 2468 | ALC57_04796  | hexapoda | Trachymyrmex cornetzi   | RNA-binding protein pno1 [Trachymyrmex cornetzi]                                                               | GCA_001594075.1 | TRADDN-NCOA6 |
| XP_022287297.1 | ATP-synt_F+CARD+CARD+TRADDN-DEDD2+CARD+CARD               | 867  | LOC111100011 | mollusca | Crassostrea virginica   | uncharacterized protein LOC111100011 isoform X3 [Crassostrea virginica]                                        | GCF_002022765.2 | TRADDN-DEDD2 |
| XP_022297006.1 | CARD+CARD+CARD+TRADDN-DEDD2+CARD+CARD+CARD+SAM+GTPase-AIG | 1088 | LOC111106572 | mollusca | Crassostrea virginica   | uncharacterized protein LOC111106572 [Crassostrea virginica]                                                   | GCF_002022765.2 | TRADDN-DEDD2 |
| XP_022287285.1 | CARD+CARD+TRADDN-DEDD2+CARD+CARD                          | 766  | LOC111100011 | mollusca | Crassostrea virginica   | uncharacterized protein LOC111100011 isoform X1 [Crassostrea virginica]                                        | GCF_002022765.2 | TRADDN-DEDD2 |
| XP_022287291.1 | CARD+CARD+TRADDN-DEDD2+CARD+CARD                          | 765  | LOC111100011 | mollusca | Crassostrea virginica   | uncharacterized protein LOC111100011 isoform X2 [Crassostrea virginica]                                        | GCF_002022765.2 | TRADDN-DEDD2 |
| XP_011437929.1 | CARD+CARD+TRADDN-DEDD2+LRRs                               | 1170 | LOC105335644 | mollusca | Crassostrea gigas       | PREDICTED: uncharacterized protein LOC105335644 [Crassostrea gigas]                                            | GCF_000297895.1 | TRADDN-DEDD2 |
| XP_022308687.1 | CARD+CARD+TRADDN-DEDD2+LRRs                               | 1124 | LOC111114601 | mollusca | Crassostrea virginica   | uncharacterized protein LOC111114601 [Crassostrea virginica]                                                   | GCF_002022765.2 | TRADDN-DEDD2 |



| acc            | architecture                                    | len | gen.name          | taxend   | species                 | define                                                                           | gca             | clade        |
|----------------|-------------------------------------------------|-----|-------------------|----------|-------------------------|----------------------------------------------------------------------------------|-----------------|--------------|
| EKC32250.1     | CARD+TRADDN-DEDD2                               | 297 | CGI_10026238      | mollusca | Crassostrea gigas       | Caspase-2, partial [Crassostrea gigas]                                           | -               | TRADDN-DEDD2 |
| XP_011416077.1 | CARD+TRADDN-DEDD2                               | 480 | LOC105320022      | mollusca | Crassostrea gigas       | PREDICTED: uncharacterized protein LOC105320022 [Crassostrea gigas]              | GCF_000297895.1 | TRADDN-DEDD2 |
| XP_022312200.1 | CARD+TRADDN-DEDD2                               | 476 | LOC111117388      | mollusca | Crassostrea virginica   | uncharacterized protein LOC111117388 [Crassostrea virginica]                     | GCF_002022765.2 | TRADDN-DEDD2 |
| XP_009059501.1 | CARD+TRADDN-DEDD2                               | 459 | LOTGIDRAFT_234111 | mollusca | Lottia gigantea         | hypothetical protein LOTGIDRAFT_234111 [Lottia gigantea]                         | GCF_000327385.1 | TRADDN-DEDD2 |
| XP_021350772.1 | CARD+TRADDN-DEDD2                               | 544 | LOC110448711      | mollusca | Mizuhopecten yessoensis | uncharacterized protein LOC110448711 [Mizuhopecten yessoensis]                   | GCF_002113885.1 | TRADDN-DEDD2 |
| KOF75889.1     | CARD+TRADDN-DEDD2                               | 391 | OCBIM_22034109mg  | mollusca | Octopus bimaculoides    | hypothetical protein OCBIM_22034109mg [Octopus bimaculoides]                     | GCA_001194135.1 | TRADDN-DEDD2 |
| XP_025082216.1 | CARD+TRADDN-DEDD2                               | 517 | LOC112556935      | mollusca | Pomacea canaliculata    | uncharacterized protein LOC112556935 [Pomacea canaliculata]                      | GCF_003073045.1 | TRADDN-DEDD2 |
| XP_014781391.1 | CARD+TRADDN-DEDD2+CARD                          | 587 | LOC106877111      | mollusca | Octopus bimaculoides    | PREDICTED: uncharacterized protein LOC106877111, partial [Octopus bimaculoides]  | GCF_001194135.1 | TRADDN-DEDD2 |
| XP_013075628.1 | CARD+TRADDN-DEDD2+Coiled-coil                   | 524 | LOC106061941      | mollusca | Biomphalaria glabrata   | PREDICTED: uncharacterized protein LOC106061941 [Biomphalaria glabrata]          | GCF_000457365.1 | TRADDN-DEDD2 |
| XP_005105349.2 | Coiled-coil+CARD+TRADDN-DEDD2                   | 616 | LOC101861459      | mollusca | Aplysia californica     | PREDICTED: uncharacterized protein LOC101861459 isoform X1 [Aplysia californica] | GCF_000002075.1 | TRADDN-DEDD2 |
| XP_012941847.1 | Coiled-coil+CARD+TRADDN-DEDD2                   | 569 | LOC101861459      | mollusca | Aplysia californica     | PREDICTED: uncharacterized protein LOC101861459 isoform X2 [Aplysia californica] | GCF_000002075.1 | TRADDN-DEDD2 |
| XP_022304237.1 | cysteine-rich-region+TM+DED+TRADDN-NCOA6        | 637 | LOC111111512      | mollusca | Crassostrea virginica   | uncharacterized protein LOC111111512 [Crassostrea virginica]                     | GCF_002022765.2 | TRADDN-NCOA6 |
| XP_022305084.1 | cysteine-rich-region+TM+DED+TRADDN-NCOA6        | 477 | LOC111112077      | mollusca | Crassostrea virginica   | uncharacterized protein LOC111112077 [Crassostrea virginica]                     | GCF_002022765.2 | TRADDN-NCOA6 |
| XP_022303703.1 | cysteine-rich-region+TM+TRADDN-NCOA6+GTPase-AIG | 762 | LOC111111178      | mollusca | Crassostrea virginica   | uncharacterized protein LOC111111178 [Crassostrea virginica]                     | GCF_002022765.2 | TRADDN-NCOA6 |
| EKC33132.1     | Death+TRADDN-DEDD2+Coiled-coil                  | 484 | CGI_10016451      | mollusca | Crassostrea gigas       | hypothetical protein CGI_10016451 [Crassostrea gigas]                            | -               | TRADDN-DEDD2 |
| XP_011450141.1 | Death+TRADDN-DEDD2+Coiled-coil                  | 521 | LOC105344171      | mollusca | Crassostrea gigas       | PREDICTED: uncharacterized protein LOC105344171 isoform X1 [Crassostrea gigas]   | GCF_000297895.1 | TRADDN-DEDD2 |
| XP_011450142.1 | Death+TRADDN-DEDD2+Coiled-coil                  | 520 | LOC105344171      | mollusca | Crassostrea gigas       | PREDICTED: uncharacterized protein LOC105344171 isoform X2 [Crassostrea gigas]   | GCF_000297895.1 | TRADDN-DEDD2 |
| XP_022313640.1 | Death+TRADDN-DEDD2+Coiled-coil                  | 512 | LOC111118443      | mollusca | Crassostrea virginica   | uncharacterized protein LOC111118443 [Crassostrea virginica]                     | GCF_002022765.2 | TRADDN-DEDD2 |

| acc            | architecture                                                        | len  | gen.name      | taxend   | species                 | define                                                                       | gca             | clade        |
|----------------|---------------------------------------------------------------------|------|---------------|----------|-------------------------|------------------------------------------------------------------------------|-----------------|--------------|
| XP_021344594.1 | Death+TRADDN-DEDD2+Coiled-coil                                      | 397  | LOC110444548  | mollusca | Mizuhopecten yessoensis | uncharacterized protein LOC110444548 [Mizuhopecten yessoensis]               | GCF_002113885.1 | TRADDN-DEDD2 |
| XP_021346619.1 | Death+TRADDN-DEDD2+Coiled-coil                                      | 526  | LOC110446013  | mollusca | Mizuhopecten yessoensis | uncharacterized protein LOC110446013 [Mizuhopecten yessoensis]               | GCF_002113885.1 | TRADDN-DEDD2 |
| EKC20172.1     | DED+TRADDN-DEDD2                                                    | 282  | CGI_10006549  | mollusca | Crassostrea gigas       | Death effector domain-containing protein [Crassostrea gigas]                 | -               | TRADDN-DEDD2 |
| XP_021353196.1 | DED+TRADDN-DEDD2                                                    | 671  | LOC110450202  | mollusca | Mizuhopecten yessoensis | polycystic kidney disease protein 1-like 3 [Mizuhopecten yessoensis]         | GCF_002113885.1 | TRADDN-DEDD2 |
| XP_011415319.2 | DED+TRADDN-NCOA6                                                    | 749  | LOC105319464  | mollusca | Crassostrea gigas       | PREDICTED: uncharacterized protein LOC105319464, partial [Crassostrea gigas] | GCF_000297895.1 | TRADDN-NCOA6 |
| XP_011424084.1 | DED+TRADDN-NCOA6                                                    | 254  | LOC105325967  | mollusca | Crassostrea gigas       | PREDICTED: uncharacterized protein LOC105325967, partial [Crassostrea gigas] | GCF_000297895.1 | TRADDN-NCOA6 |
| XP_019927893.1 | DED+TRADDN-NCOA6                                                    | 248  | LOC105340598  | mollusca | Crassostrea gigas       | PREDICTED: uncharacterized protein LOC105340598 [Crassostrea gigas]          | GCF_000297895.1 | TRADDN-NCOA6 |
| OWF50257.1     | DED+TRADDN-NCOA6                                                    | 653  | KP79_PYT16096 | mollusca | Mizuhopecten yessoensis | hypothetical protein KP79_PYT16096 [Mizuhopecten yessoensis]                 | GCA_002113885.2 | TRADDN-NCOA6 |
| XP_021353940.1 | DED+TRADDN-NCOA6                                                    | 634  | LOC110450644  | mollusca | Mizuhopecten yessoensis | uncharacterized protein LOC110450644 [Mizuhopecten yessoensis]               | GCF_002113885.1 | TRADDN-NCOA6 |
| XP_011439450.1 | DED+TRADDN-NCOA6+alpha-rich-region                                  | 613  | LOC105336712  | mollusca | Crassostrea gigas       | PREDICTED: uncharacterized protein LOC105336712 [Crassostrea gigas]          | GCF_000297895.1 | TRADDN-NCOA6 |
| XP_011447297.1 | DED+TRADDN-NCOA6+alpha-rich-region                                  | 559  | LOC105342134  | mollusca | Crassostrea gigas       | PREDICTED: uncharacterized protein LOC105342134 [Crassostrea gigas]          | GCF_000297895.1 | TRADDN-NCOA6 |
| XP_022330360.1 | DED+TRADDN-NCOA6+alpha-rich-region                                  | 605  | LOC111128796  | mollusca | Crassostrea virginica   | uncharacterized protein LOC111128796 [Crassostrea virginica]                 | GCF_002022765.2 | TRADDN-NCOA6 |
| XP_022343986.1 | DED+TRADDN-NCOA6+alpha-rich-region                                  | 627  | LOC111137049  | mollusca | Crassostrea virginica   | uncharacterized protein LOC111137049 [Crassostrea virginica]                 | GCF_002022765.2 | TRADDN-NCOA6 |
| XP_011457018.2 | DED+TRADDN-NCOA6+DED+domain1+CARD                                   | 859  | LOC105349046  | mollusca | Crassostrea gigas       | PREDICTED: uncharacterized protein LOC105349046 [Crassostrea gigas]          | GCF_000297895.1 | TRADDN-NCOA6 |
| EKC32942.1     | DED+TRADDN-NCOA6+RRM+RRM+RRM+RRM+KH+KH+KH+KH+KH+KH+KH+KH+Macro+PARP | 1786 | CGI_10024733  | mollusca | Crassostrea gigas       | Poly [ADP-ribose] polymerase 14 [Crassostrea gigas]                          | -               | TRADDN-NCOA6 |
| XP_011455095.1 | DED+TRADDN-NCOA6+RRM+RRM+RRM+RRM+KH+KH+KH+KH+KH+KH+KH+KH+Macro+PARP | 1802 | LOC105347636  | mollusca | Crassostrea gigas       | PREDICTED: poly [ADP-ribose] polymerase 14 [Crassostrea gigas]               | GCF_000297895.1 | TRADDN-NCOA6 |
| XP_022299287.1 | DED+TRADDN-NCOA6+RRM+RRM+RRM+RRM+KH+KH+KH+KH+KH+KH+KH+KH+Macro+PARP | 1866 | LOC111108063  | mollusca | Crassostrea virginica   | poly [ADP-ribose] polymerase 14-like isoform X1 [Crassostrea virginica]      | GCF_002022765.2 | TRADDN-NCOA6 |
| XP_022299288.1 | DED+TRADDN-NCOA6+RRM+RRM+RRM+RRM+KH+KH+KH+KH+KH+KH+KH+KH+Macro+PARP | 1860 | LOC111108063  | mollusca | Crassostrea virginica   | poly [ADP-ribose] polymerase 14-like isoform X2 [Crassostrea virginica]      | GCF_002022765.2 | TRADDN-NCOA6 |
| XP_022299290.1 | DED+TRADDN-NCOA6+RRM+RRM+RRM+RRM+KH+KH+KH+KH+KH+KH+KH+KH+Macro+PARP | 1855 | LOC111108063  | mollusca | Crassostrea virginica   | poly [ADP-ribose] polymerase 14-like isoform X3 [Crassostrea virginica]      | GCF_002022765.2 | TRADDN-NCOA6 |
| XP_022299291.1 | DED+TRADDN-NCOA6+RRM+RRM+RRM+RRM+KH+KH+KH+KH+KH+KH+KH+KH+Macro+PARP | 1725 | LOC111108063  | mollusca | Crassostrea virginica   | poly [ADP-ribose] polymerase 14-like isoform X4 [Crassostrea virginica]      | GCF_002022765.2 | TRADDN-NCOA6 |

| acc            | architecture                                                     | len  | gen.name     | taxend   | species               | define                                                                         | gca             | clade        |
|----------------|------------------------------------------------------------------|------|--------------|----------|-----------------------|--------------------------------------------------------------------------------|-----------------|--------------|
| XP_022299593.1 | DED+TRADDN-NCOA6+RRM+RRM+RRM+RRM+KH+KH+KH+KH+KH+KH+KH+Macro+PARP | 1859 | LOC111108206 | mollusca | Crassostrea virginica | poly [ADP-ribose] polymerase 14-like isoform X1 [Crassostrea virginica]        | GCF_002022765.2 | TRADDN-NCOA6 |
| XP_022299594.1 | DED+TRADDN-NCOA6+RRM+RRM+RRM+RRM+KH+KH+KH+KH+KH+KH+KH+Macro+PARP | 1848 | LOC111108206 | mollusca | Crassostrea virginica | poly [ADP-ribose] polymerase 14-like isoform X2 [Crassostrea virginica]        | GCF_002022765.2 | TRADDN-NCOA6 |
| EKC20864.1     | DED+TRADDN-NCOA6+Transposase_mutator                             | 959  | CGI_10005191 | mollusca | Crassostrea gigas     | hypothetical protein CGI_10005191 [Crassostrea gigas]                          | -               | TRADDN-NCOA6 |
| XP_011421347.1 | HEPN+DED+TRADDN-NCOA6                                            | 466  | LOC105323978 | mollusca | Crassostrea gigas     | PREDICTED: uncharacterized protein LOC105323978 [Crassostrea gigas]            | GCF_000297895.1 | TRADDN-NCOA6 |
| XP_011436933.2 | HEPN+Ig+DED+TRADDN-NCOA6                                         | 1313 | LOC105334978 | mollusca | Crassostrea gigas     | PREDICTED: uncharacterized protein LOC105334978 [Crassostrea gigas]            | GCF_000297895.1 | TRADDN-NCOA6 |
| XP_011420321.1 | HEPN+Ig+Ig+Ig+Ig+DED+TRADDN-NCOA6                                | 1253 | LOC105323062 | mollusca | Crassostrea gigas     | PREDICTED: uncharacterized protein LOC105323062 [Crassostrea gigas]            | GCF_000297895.1 | TRADDN-NCOA6 |
| XP_011420322.1 | HEPN+Ig+Ig+Ig+Ig+DED+TRADDN-NCOA6                                | 1253 | LOC105323062 | mollusca | Crassostrea gigas     | PREDICTED: uncharacterized protein LOC105323062 [Crassostrea gigas]            | GCF_000297895.1 | TRADDN-NCOA6 |
| XP_011431936.1 | HEPN+Ig+Ig+Ig+Ig+DED+TRADDN-NCOA6                                | 970  | LOC105331445 | mollusca | Crassostrea gigas     | PREDICTED: uncharacterized protein LOC105331445 isoform X8 [Crassostrea gigas] | GCF_000297895.1 | TRADDN-NCOA6 |
| XP_011431937.1 | HEPN+Ig+Ig+Ig+Ig+DED+TRADDN-NCOA6                                | 970  | LOC105331445 | mollusca | Crassostrea gigas     | PREDICTED: uncharacterized protein LOC105331445 isoform X8 [Crassostrea gigas] | GCF_000297895.1 | TRADDN-NCOA6 |
| XP_011431938.1 | HEPN+Ig+Ig+Ig+Ig+DED+TRADDN-NCOA6                                | 970  | LOC105331445 | mollusca | Crassostrea gigas     | PREDICTED: uncharacterized protein LOC105331445 isoform X8 [Crassostrea gigas] | GCF_000297895.1 | TRADDN-NCOA6 |
| XP_011440659.1 | HEPN+Ig+Ig+Ig+Ig+DED+TRADDN-NCOA6                                | 955  | LOC105337573 | mollusca | Crassostrea gigas     | PREDICTED: uncharacterized protein LOC105337573 [Crassostrea gigas]            | GCF_000297895.1 | TRADDN-NCOA6 |
| XP_011452299.1 | HEPN+Ig+Ig+Ig+Ig+DED+TRADDN-NCOA6                                | 821  | LOC105345719 | mollusca | Crassostrea gigas     | PREDICTED: muscle M-line assembly protein unc-89-like [Crassostrea gigas]      | GCF_000297895.1 | TRADDN-NCOA6 |
| XP_019926764.1 | HEPN+Ig+Ig+Ig+Ig+DED+TRADDN-NCOA6                                | 955  | LOC105337703 | mollusca | Crassostrea gigas     | PREDICTED: muscle M-line assembly protein unc-89-like [Crassostrea gigas]      | GCF_000297895.1 | TRADDN-NCOA6 |
| EKC27565.1     | HEPN+Ig+Ig+Ig+Ig+DED+TRADDN-NCOA6+Beta-propeller                 | 957  | CGI_10017571 | mollusca | Crassostrea gigas     | hypothetical protein CGI_10017571 [Crassostrea gigas]                          | -               | TRADDN-NCOA6 |
| XP_011431928.1 | HEPN+Ig+Ig+Ig+Ig+DED+TRADDN-NCOA6+Beta-propeller                 | 1511 | LOC105331445 | mollusca | Crassostrea gigas     | PREDICTED: uncharacterized protein LOC105331445 isoform X1 [Crassostrea gigas] | GCF_000297895.1 | TRADDN-NCOA6 |
| XP_011431929.1 | HEPN+Ig+Ig+Ig+Ig+DED+TRADDN-NCOA6+Beta-propeller                 | 1511 | LOC105331445 | mollusca | Crassostrea gigas     | PREDICTED: uncharacterized protein LOC105331445 isoform X1 [Crassostrea gigas] | GCF_000297895.1 | TRADDN-NCOA6 |
| XP_011431930.1 | HEPN+Ig+Ig+Ig+Ig+DED+TRADDN-NCOA6+Beta-propeller                 | 1462 | LOC105331445 | mollusca | Crassostrea gigas     | PREDICTED: uncharacterized protein LOC105331445 isoform X2 [Crassostrea gigas] | GCF_000297895.1 | TRADDN-NCOA6 |
| XP_011431931.1 | HEPN+Ig+Ig+Ig+Ig+DED+TRADDN-NCOA6+Beta-propeller                 | 1462 | LOC105331445 | mollusca | Crassostrea gigas     | PREDICTED: uncharacterized protein LOC105331445 isoform X3 [Crassostrea gigas] | GCF_000297895.1 | TRADDN-NCOA6 |

| acc            | architecture                                              | len  | gen.name          | taxend   | species               | define                                                                                     | gca             | clade                 |
|----------------|-----------------------------------------------------------|------|-------------------|----------|-----------------------|--------------------------------------------------------------------------------------------|-----------------|-----------------------|
| XP_011431932.1 | HEPN+Ig+Ig+Ig+Ig+DED+TRADDN-NCOA6+Beta-propeller          | 1457 | LOC105331445      | mollusca | Crassostrea gigas     | PREDICTED: uncharacterized protein LOC105331445 isoform X4 [Crassostrea gigas]             | GCF_000297895.1 | TRADDN-NCOA6          |
| XP_011431933.1 | HEPN+Ig+Ig+Ig+Ig+DED+TRADDN-NCOA6+Beta-propeller          | 1457 | LOC105331445      | mollusca | Crassostrea gigas     | PREDICTED: uncharacterized protein LOC105331445 isoform X5 [Crassostrea gigas]             | GCF_000297895.1 | TRADDN-NCOA6          |
| XP_011431934.1 | HEPN+Ig+Ig+Ig+Ig+DED+TRADDN-NCOA6+Beta-propeller          | 1410 | LOC105331445      | mollusca | Crassostrea gigas     | PREDICTED: uncharacterized protein LOC105331445 isoform X6 [Crassostrea gigas]             | GCF_000297895.1 | TRADDN-NCOA6          |
| XP_011431935.1 | HEPN+Ig+Ig+Ig+Ig+DED+TRADDN-NCOA6+Beta-propeller          | 1305 | LOC105331445      | mollusca | Crassostrea gigas     | PREDICTED: uncharacterized protein LOC105331445 isoform X7 [Crassostrea gigas]             | GCF_000297895.1 | TRADDN-NCOA6          |
| XP_011454060.1 | HEPN+Ig+Ig+Ig+Ig+DED+TRADDN-NCOA6+Mab-21+TPRs             | 1647 | LOC105346950      | mollusca | Crassostrea gigas     | PREDICTED: uncharacterized protein LOC105346950 [Crassostrea gigas]                        | GCF_000297895.1 | TRADDN-NCOA6          |
| EKC23269.1     | HEPN+Ig+TRADDN-NCOA6                                      | 424  | CGI_10019635      | mollusca | Crassostrea gigas     | hypothetical protein CGI_10019635 [Crassostrea gigas]                                      | -               | TRADDN-NCOA6          |
| XP_022313827.1 | HEPN+TRADDN-DEDD2+CCCH-ZF+CCCH-ZF+CCCH-ZF+C2H2-ZF         | 1228 | LOC111118580      | mollusca | Crassostrea virginica | uncharacterized protein LOC111118580 isoform X1 [Crassostrea virginica]                    | GCF_002022765.2 | TRADDN-DEDD2          |
| XP_011421835.1 | Ig+DED+TRADDN-NCOA6+BBOX+Beta-propeller                   | 1314 | LOC105324463      | mollusca | Crassostrea gigas     | PREDICTED: uncharacterized protein LOC105324463 [Crassostrea gigas]                        | GCF_000297895.1 | TRADDN-NCOA6          |
| EKC29935.1     | Ig+TRADDN-NCOA6                                           | 261  | CGI_10008535      | mollusca | Crassostrea gigas     | hypothetical protein CGI_10008535 [Crassostrea gigas]                                      | -               | TRADDN-NCOA6          |
| EKC37633.1     | Ig+TRADDN-NCOA6                                           | 421  | CGI_10026917      | mollusca | Crassostrea gigas     | hypothetical protein CGI_10026917 [Crassostrea gigas]                                      | -               | TRADDN-NCOA6          |
| EKC17255.1     | Ig+TRADDN-NCOA6+Beta-propeller                            | 526  | CGI_10001397      | mollusca | Crassostrea gigas     | Tripartite motif-containing protein 3 [Crassostrea gigas]                                  | -               | TRADDN-NCOA6          |
| XP_011413782.1 | low-complexity+DED+TRADDN-DEDD2                           | 319  | LOC105318392      | mollusca | Crassostrea gigas     | PREDICTED: death effector domain-containing protein [Crassostrea gigas]                    | GCF_000297895.1 | TRADDN-DEDD2          |
| XP_022321014.1 | low-complexity+DED+TRADDN-DEDD2                           | 319  | LOC111123153      | mollusca | Crassostrea virginica | LOW QUALITY PROTEIN: death effector domain-containing protein-like [Crassostrea virginica] | GCF_002022765.2 | TRADDN-DEDD2          |
| XP_009049201.1 | low-complexity+DED+TRADDN-DEDD2                           | 292  | LOTGIDRAFT_213215 | mollusca | Lottia gigantea       | hypothetical protein LOTGIDRAFT_213215 [Lottia gigantea]                                   | GCF_000327385.1 | TRADDN-DEDD2          |
| XP_014787580.1 | low-complexity+DED+TRADDN-DEDD2                           | 364  | LOC106881630      | mollusca | Octopus bimaculoides  | PREDICTED: death effector domain-containing protein-like [Octopus bimaculoides]            | GCF_001194135.1 | TRADDN-DEDD2          |
| XP_025103018.1 | low-complexity+DED+TRADDN-DEDD2                           | 353  | LOC112569446      | mollusca | Pomacea canaliculata  | death effector domain-containing protein-like [Pomacea canaliculata]                       | GCF_003073045.1 | TRADDN-DEDD2          |
| XP_014785637.1 | N-ter+TRADDN-Bac                                          | 197  | LOC106880279      | mollusca | Octopus bimaculoides  | PREDICTED: uncharacterized protein LOC106880279, partial [Octopus bimaculoides]            | GCF_001194135.1 | TRADDN-Bacterial-like |
| EKC32787.1     | PID+PDZ+PDZ+TRADDN-NCOA6+DED+domain1+DED+domain1          | 1885 | CGI_10017177      | mollusca | Crassostrea gigas     | Protein lin-10 [Crassostrea gigas]                                                         | -               | TRADDN-NCOA6          |
| XP_011439255.1 | TM+cysteine-rich-region+TM+alpha-rich-region+TRADDN-NCOA6 | 521  | LOC105336589      | mollusca | Crassostrea gigas     | PREDICTED: uncharacterized protein LOC105336589 isoform X2 [Crassostrea gigas]             | GCF_000297895.1 | TRADDN-NCOA6          |

| acc            | architecture                                                                                                                      | len  | gen.name     | taxend   | species               | define                                                                  | gca             | clade        |
|----------------|-----------------------------------------------------------------------------------------------------------------------------------|------|--------------|----------|-----------------------|-------------------------------------------------------------------------|-----------------|--------------|
| XP_019926313.1 | TM+cysteine-rich-region+TM+alpha-rich-region+TRADDN-NCOA6                                                                         | 533  | LOC105336589 | mollusca | Crassostrea gigas     | PREDICTED: uncharacterized protein LOC105336589 isoform X1              | GCF_000297895.1 | TRADDN-NCOA6 |
| XP_022296697.1 | TM+cysteine-rich-region+TM+alpha-rich-region+TRADDN-NCOA6                                                                         | 549  | LOC111106341 | mollusca | Crassostrea virginica | [Crassostrea gigas] uncharacterized protein LOC111106341 isoform X1     | GCF_002022765.2 | TRADDN-NCOA6 |
| XP_022296698.1 | TM+cysteine-rich-region+TM+alpha-rich-region+TRADDN-NCOA6                                                                         | 537  | LOC111106341 | mollusca | Crassostrea virginica | [Crassostrea virginica] uncharacterized protein LOC111106341 isoform X2 | GCF_002022765.2 | TRADDN-NCOA6 |
| XP_022302686.1 | TM+cysteine-rich-region+TM+alpha-rich-region+TRADDN-NCOA6+BBOX+BBOX+alpha-rich-region+Beta-propeller+C-terminal-helical-extension | 1236 | LOC111110476 | mollusca | Crassostrea virginica | [Crassostrea virginica] uncharacterized protein LOC111110476 isoform X1 | GCF_002022765.2 | TRADDN-NCOA6 |
| XP_022302687.1 | TM+cysteine-rich-region+TM+alpha-rich-region+TRADDN-NCOA6+BBOX+BBOX+alpha-rich-region+Beta-propeller+C-terminal-helical-extension | 1235 | LOC111110476 | mollusca | Crassostrea virginica | [Crassostrea virginica] uncharacterized protein LOC111110476 isoform X2 | GCF_002022765.2 | TRADDN-NCOA6 |
| XP_022302688.1 | TM+cysteine-rich-region+TM+alpha-rich-region+TRADDN-NCOA6+BBOX+BBOX+alpha-rich-region+Beta-propeller+C-terminal-helical-extension | 1235 | LOC111110476 | mollusca | Crassostrea virginica | [Crassostrea virginica] uncharacterized protein LOC111110476 isoform X3 | GCF_002022765.2 | TRADDN-NCOA6 |
| XP_022302689.1 | TM+cysteine-rich-region+TM+alpha-rich-region+TRADDN-NCOA6+BBOX+BBOX+alpha-rich-region+Beta-propeller+C-terminal-helical-extension | 1215 | LOC111110476 | mollusca | Crassostrea virginica | [Crassostrea virginica] uncharacterized protein LOC111110476 isoform X4 | GCF_002022765.2 | TRADDN-NCOA6 |
| XP_022302690.1 | TM+cysteine-rich-region+TM+alpha-rich-region+TRADDN-NCOA6+BBOX+BBOX+alpha-rich-region+Beta-propeller+C-terminal-helical-extension | 1215 | LOC111110476 | mollusca | Crassostrea virginica | [Crassostrea virginica] uncharacterized protein LOC111110476 isoform X5 | GCF_002022765.2 | TRADDN-NCOA6 |
| XP_022302692.1 | TM+cysteine-rich-region+TM+alpha-rich-region+TRADDN-NCOA6+BBOX+BBOX+alpha-rich-region+Beta-propeller+C-terminal-helical-extension | 1214 | LOC111110476 | mollusca | Crassostrea virginica | [Crassostrea virginica] uncharacterized protein LOC111110476 isoform X6 | GCF_002022765.2 | TRADDN-NCOA6 |
| XP_022302693.1 | TM+cysteine-rich-region+TM+alpha-rich-region+TRADDN-NCOA6+BBOX+BBOX+alpha-rich-region+Beta-propeller+C-terminal-helical-extension | 1194 | LOC111110476 | mollusca | Crassostrea virginica | [Crassostrea virginica] uncharacterized protein LOC111110476 isoform X7 | GCF_002022765.2 | TRADDN-NCOA6 |
| XP_022302851.1 | TM+cysteine-rich-region+TM+alpha-rich-region+TRADDN-NCOA6+BBOX+BBOX+alpha-rich-region+Beta-propeller+C-terminal-helical-extension | 1482 | LOC111110585 | mollusca | Crassostrea virginica | [Crassostrea virginica] uncharacterized protein LOC111110585 isoform X1 | GCF_002022765.2 | TRADDN-NCOA6 |
| XP_022302852.1 | TM+cysteine-rich-region+TM+alpha-rich-region+TRADDN-NCOA6+BBOX+BBOX+alpha-rich-region+Beta-propeller+C-terminal-helical-extension | 1467 | LOC111110585 | mollusca | Crassostrea virginica | [Crassostrea virginica] uncharacterized protein LOC111110585 isoform X2 | GCF_002022765.2 | TRADDN-NCOA6 |
| XP_022302853.1 | TM+cysteine-rich-region+TM+alpha-rich-region+TRADDN-NCOA6+BBOX+BBOX+alpha-rich-region+Beta-propeller+C-terminal-helical-extension | 1467 | LOC111110585 | mollusca | Crassostrea virginica | [Crassostrea virginica] uncharacterized protein LOC111110585 isoform X3 | GCF_002022765.2 | TRADDN-NCOA6 |
| XP_022302854.1 | TM+cysteine-rich-region+TM+alpha-rich-region+TRADDN-NCOA6+BBOX+BBOX+alpha-rich-region+Beta-propeller+C-terminal-helical-extension | 1447 | LOC111110585 | mollusca | Crassostrea virginica | [Crassostrea virginica] uncharacterized protein LOC111110585 isoform X4 | GCF_002022765.2 | TRADDN-NCOA6 |
| XP_022302856.1 | TM+cysteine-rich-region+TM+alpha-rich-region+TRADDN-NCOA6+BBOX+BBOX+alpha-rich-region+Beta-propeller+C-terminal-helical-extension | 1447 | LOC111110585 | mollusca | Crassostrea virginica | [Crassostrea virginica] uncharacterized protein LOC111110585 isoform X5 | GCF_002022765.2 | TRADDN-NCOA6 |
| XP_022302694.1 | TM+cysteine-rich-region+TM+alpha-rich-region+TRADDN-NCOA6+HSP70                                                                   | 998  | LOC111110477 | mollusca | Crassostrea virginica | [Crassostrea virginica] uncharacterized protein LOC111110477 isoform X1 | GCF_002022765.2 | TRADDN-NCOA6 |
| XP_022302695.1 | TM+cysteine-rich-region+TM+alpha-rich-region+TRADDN-NCOA6+HSP70                                                                   | 987  | LOC111110477 | mollusca | Crassostrea virginica | [Crassostrea virginica] uncharacterized protein LOC111110477 isoform X2 | GCF_002022765.2 | TRADDN-NCOA6 |

| acc            | architecture                                                              | len  | gen.name     | taxend   | species               | define                                                                               | gca             | clade        |
|----------------|---------------------------------------------------------------------------|------|--------------|----------|-----------------------|--------------------------------------------------------------------------------------|-----------------|--------------|
| XP_022302696.1 | TM+cysteine-rich-region+TM+alpha-rich-region+TRADDN-NCOA6+HSP70           | 987  | LOC111110477 | mollusca | Crassostrea virginica | uncharacterized protein<br>LOC111110477 isoform X3<br>[Crassostrea virginica]        | GCF_002022765.2 | TRADDN-NCOA6 |
| XP_022302697.1 | TM+cysteine-rich-region+TM+alpha-rich-region+TRADDN-NCOA6+HSP70           | 979  | LOC111110477 | mollusca | Crassostrea virginica | uncharacterized protein<br>LOC111110477 isoform X4<br>[Crassostrea virginica]        | GCF_002022765.2 | TRADDN-NCOA6 |
| XP_022302698.1 | TM+cysteine-rich-region+TM+alpha-rich-region+TRADDN-NCOA6+HSP70           | 976  | LOC111110477 | mollusca | Crassostrea virginica | uncharacterized protein<br>LOC111110477 isoform X5<br>[Crassostrea virginica]        | GCF_002022765.2 | TRADDN-NCOA6 |
| XP_022302699.1 | TM+cysteine-rich-region+TM+alpha-rich-region+TRADDN-NCOA6+HSP70           | 965  | LOC111110477 | mollusca | Crassostrea virginica | uncharacterized protein<br>LOC111110477 isoform X6<br>[Crassostrea virginica]        | GCF_002022765.2 | TRADDN-NCOA6 |
| XP_022302700.1 | TM+cysteine-rich-region+TM+alpha-rich-region+TRADDN-NCOA6+HSP70           | 924  | LOC111110477 | mollusca | Crassostrea virginica | uncharacterized protein<br>LOC111110477 isoform X7<br>[Crassostrea virginica]        | GCF_002022765.2 | TRADDN-NCOA6 |
| XP_022302701.1 | TM+cysteine-rich-region+TM+alpha-rich-region+TRADDN-NCOA6+HSP70           | 904  | LOC111110479 | mollusca | Crassostrea virginica | uncharacterized protein<br>LOC111110479 [Crassostrea<br>virginica]                   | GCF_002022765.2 | TRADDN-NCOA6 |
| XP_022297444.1 | TM+cysteine-rich-region+TM+alpha-rich-region+TRADDN-NCOA6+nSTAND3+Ankyrin | 2660 | LOC111106874 | mollusca | Crassostrea virginica | uncharacterized protein<br>LOC111106874 isoform X1<br>[Crassostrea virginica]        | GCF_002022765.2 | TRADDN-NCOA6 |
| XP_022297449.1 | TM+cysteine-rich-region+TM+alpha-rich-region+TRADDN-NCOA6+nSTAND3+Ankyrin | 2654 | LOC111106874 | mollusca | Crassostrea virginica | uncharacterized protein<br>LOC111106874 isoform X2<br>[Crassostrea virginica]        | GCF_002022765.2 | TRADDN-NCOA6 |
| XP_022297450.1 | TM+cysteine-rich-region+TM+alpha-rich-region+TRADDN-NCOA6+nSTAND3+Ankyrin | 2653 | LOC111106874 | mollusca | Crassostrea virginica | uncharacterized protein<br>LOC111106874 isoform X3<br>[Crassostrea virginica]        | GCF_002022765.2 | TRADDN-NCOA6 |
| XP_022297451.1 | TM+cysteine-rich-region+TM+alpha-rich-region+TRADDN-NCOA6+nSTAND3+Ankyrin | 2649 | LOC111106874 | mollusca | Crassostrea virginica | uncharacterized protein<br>LOC111106874 isoform X4<br>[Crassostrea virginica]        | GCF_002022765.2 | TRADDN-NCOA6 |
| XP_022297452.1 | TM+cysteine-rich-region+TM+alpha-rich-region+TRADDN-NCOA6+nSTAND3+Ankyrin | 2550 | LOC111106874 | mollusca | Crassostrea virginica | uncharacterized protein<br>LOC111106874 isoform X5<br>[Crassostrea virginica]        | GCF_002022765.2 | TRADDN-NCOA6 |
| XP_019920469.1 | TM+cysteine-rich-region+TM+DED+TRADDN-NCOA6+DED+domain1+Death+Death       | 1005 | LOC105322444 | mollusca | Crassostrea gigas     | PREDICTED: uncharacterized<br>protein LOC105322444 isoform X1<br>[Crassostrea gigas] | GCF_000297895.1 | TRADDN-NCOA6 |
| XP_019920470.1 | TM+cysteine-rich-region+TM+DED+TRADDN-NCOA6+DED+domain1+Death+Death       | 998  | LOC105322444 | mollusca | Crassostrea gigas     | PREDICTED: uncharacterized<br>protein LOC105322444 isoform X2<br>[Crassostrea gigas] | GCF_000297895.1 | TRADDN-NCOA6 |
| XP_022332993.1 | TM+cysteine-rich-region+TM+DED+TRADDN-NCOA6+DED+domain1+Death+Death       | 1013 | LOC111130339 | mollusca | Crassostrea virginica | uncharacterized protein<br>LOC111130339 [Crassostrea<br>virginica]                   | GCF_002022765.2 | TRADDN-NCOA6 |
| XP_022332995.1 | TM+cysteine-rich-region+TM+DED+TRADDN-NCOA6+DED+domain1+Death+Death       | 984  | LOC111130340 | mollusca | Crassostrea virginica | uncharacterized protein<br>LOC111130340 isoform X1<br>[Crassostrea virginica]        | GCF_002022765.2 | TRADDN-NCOA6 |
| XP_022332998.1 | TM+cysteine-rich-region+TM+DED+TRADDN-NCOA6+DED+domain1+Death+Death       | 983  | LOC111130340 | mollusca | Crassostrea virginica | uncharacterized protein<br>LOC111130340 isoform X2<br>[Crassostrea virginica]        | GCF_002022765.2 | TRADDN-NCOA6 |
| XP_022333000.1 | TM+cysteine-rich-region+TM+DED+TRADDN-NCOA6+DED+domain1+Death+Death       | 973  | LOC111130340 | mollusca | Crassostrea virginica | uncharacterized protein<br>LOC111130340 isoform X3<br>[Crassostrea virginica]        | GCF_002022765.2 | TRADDN-NCOA6 |

| acc            | architecture                                                        | len  | gen.name     | taxend   | species               | define                                                                        | gca             | clade        |
|----------------|---------------------------------------------------------------------|------|--------------|----------|-----------------------|-------------------------------------------------------------------------------|-----------------|--------------|
| XP_022333001.1 | TM+cysteine-rich-region+TM+DED+TRADDN-NCOA6+DED+domain1+Death+Death | 972  | LOC111130340 | mollusca | Crassostrea virginica | uncharacterized protein<br>LOC111130340 isoform X4<br>[Crassostrea virginica] | GCF_002022765.2 | TRADDN-NCOA6 |
| XP_022334756.1 | TM+cysteine-rich-region+TM+DED+TRADDN-NCOA6+DED+domain1+Death+Death | 994  | LOC111131489 | mollusca | Crassostrea virginica | uncharacterized protein<br>LOC111131489 isoform X1<br>[Crassostrea virginica] | GCF_002022765.2 | TRADDN-NCOA6 |
| XP_022334757.1 | TM+cysteine-rich-region+TM+DED+TRADDN-NCOA6+DED+domain1+Death+Death | 976  | LOC111131489 | mollusca | Crassostrea virginica | uncharacterized protein<br>LOC111131489 isoform X2<br>[Crassostrea virginica] | GCF_002022765.2 | TRADDN-NCOA6 |
| XP_022334759.1 | TM+cysteine-rich-region+TM+DED+TRADDN-NCOA6+DED+domain1+Death+Death | 914  | LOC111131489 | mollusca | Crassostrea virginica | uncharacterized protein<br>LOC111131489 isoform X3<br>[Crassostrea virginica] | GCF_002022765.2 | TRADDN-NCOA6 |
| XP_022334760.1 | TM+cysteine-rich-region+TM+DED+TRADDN-NCOA6+DED+domain1+Death+Death | 980  | LOC111131490 | mollusca | Crassostrea virginica | uncharacterized protein<br>LOC111131490 isoform X1<br>[Crassostrea virginica] | GCF_002022765.2 | TRADDN-NCOA6 |
| XP_022334764.1 | TM+cysteine-rich-region+TM+DED+TRADDN-NCOA6+DED+domain1+Death+Death | 979  | LOC111131490 | mollusca | Crassostrea virginica | uncharacterized protein<br>LOC111131490 isoform X2<br>[Crassostrea virginica] | GCF_002022765.2 | TRADDN-NCOA6 |
| XP_022300526.1 | TM+cysteine-rich-region+TM+DED+TRADDN-NCOA6+EB+EB+GTPase-AIG        | 1255 | LOC111108757 | mollusca | Crassostrea virginica | uncharacterized protein<br>LOC111108757 [Crassostrea<br>virginica]            | GCF_002022765.2 | TRADDN-NCOA6 |
| XP_022306074.1 | TM+cysteine-rich-region+TM+TRADDN-NCOA6                             | 741  | LOC111112665 | mollusca | Crassostrea virginica | uncharacterized protein<br>LOC111112665 isoform X5<br>[Crassostrea virginica] | GCF_002022765.2 | TRADDN-NCOA6 |
| XP_022308757.1 | TM+cysteine-rich-region+TM+TRADDN-NCOA6                             | 761  | LOC111114647 | mollusca | Crassostrea virginica | uncharacterized protein<br>LOC111114647 isoform X4<br>[Crassostrea virginica] | GCF_002022765.2 | TRADDN-NCOA6 |
| XP_022306073.1 | TM+cysteine-rich-region+TM+TRADDN-NCOA6+HEPN                        | 927  | LOC111112665 | mollusca | Crassostrea virginica | uncharacterized protein<br>LOC111112665 isoform X4<br>[Crassostrea virginica] | GCF_002022765.2 | TRADDN-NCOA6 |
| XP_022306070.1 | TM+cysteine-rich-region+TM+TRADDN-NCOA6+HEPN+nSTAND3+Ankyrin        | 1802 | LOC111112665 | mollusca | Crassostrea virginica | uncharacterized protein<br>LOC111112665 isoform X1<br>[Crassostrea virginica] | GCF_002022765.2 | TRADDN-NCOA6 |
| XP_022306071.1 | TM+cysteine-rich-region+TM+TRADDN-NCOA6+HEPN+nSTAND3+Ankyrin        | 1789 | LOC111112665 | mollusca | Crassostrea virginica | uncharacterized protein<br>LOC111112665 isoform X2<br>[Crassostrea virginica] | GCF_002022765.2 | TRADDN-NCOA6 |
| XP_022306072.1 | TM+cysteine-rich-region+TM+TRADDN-NCOA6+HEPN+nSTAND3+Ankyrin        | 1682 | LOC111112665 | mollusca | Crassostrea virginica | uncharacterized protein<br>LOC111112665 isoform X3<br>[Crassostrea virginica] | GCF_002022765.2 | TRADDN-NCOA6 |
| XP_022308753.1 | TM+cysteine-rich-region+TM+TRADDN-NCOA6+HEPN+nSTAND3+Ankyrin        | 2456 | LOC111114647 | mollusca | Crassostrea virginica | uncharacterized protein<br>LOC111114647 isoform X1<br>[Crassostrea virginica] | GCF_002022765.2 | TRADDN-NCOA6 |
| XP_022308755.1 | TM+cysteine-rich-region+TM+TRADDN-NCOA6+HEPN+nSTAND3+Ankyrin        | 2391 | LOC111114647 | mollusca | Crassostrea virginica | uncharacterized protein<br>LOC111114647 isoform X2<br>[Crassostrea virginica] | GCF_002022765.2 | TRADDN-NCOA6 |
| XP_022308756.1 | TM+cysteine-rich-region+TM+TRADDN-NCOA6+HEPN+nSTAND3+Ankyrin        | 2376 | LOC111114647 | mollusca | Crassostrea virginica | uncharacterized protein<br>LOC111114647 isoform X3<br>[Crassostrea virginica] | GCF_002022765.2 | TRADDN-NCOA6 |
| XP_019918422.1 | TM+DED+DED+TRADDN-NCOA6+domain1                                     | 661  | LOC105317437 | mollusca | Crassostrea gigas     | PREDICTED: uncharacterized<br>protein LOC105317437 [Crassostrea<br>gigas]     | GCF_000297895.1 | TRADDN-NCOA6 |

| acc            | architecture             | len  | gen.name          | taxend   | species                 | define                                                                           | gca             | clade        |
|----------------|--------------------------|------|-------------------|----------|-------------------------|----------------------------------------------------------------------------------|-----------------|--------------|
| XP_011456644.1 | TM+TM+TM+TM+TRADDN-DEDD2 | 289  | LOC105348775      | mollusca | Crassostrea gigas       | PREDICTED: uncharacterized protein LOC105348775 [Crassostrea gigas]              | GCF_000297895.1 | TRADDN-DEDD2 |
| XP_012942262.1 | TRADDN-DEDD2             | 275  | LOC106012799      | mollusca | Aplysia californica     | PREDICTED: uncharacterized protein LOC106012799 [Aplysia californica]            | GCF_000002075.1 | TRADDN-DEDD2 |
| XP_013068013.1 | TRADDN-DEDD2             | 168  | LOC106056012      | mollusca | Biomphalaria glabrata   | PREDICTED: uncharacterized protein LOC106056012 [Biomphalaria glabrata]          | GCF_000457365.1 | TRADDN-DEDD2 |
| EKC22839.1     | TRADDN-DEDD2             | 89   | CGI_10001393      | mollusca | Crassostrea gigas       | Death effector domain-containing protein [Crassostrea gigas]                     | -               | TRADDN-DEDD2 |
| XP_011411881.1 | TRADDN-DEDD2             | 123  | LOC105317049      | mollusca | Crassostrea gigas       | PREDICTED: death effector domain-containing protein, partial [Crassostrea gigas] | GCF_000297895.1 | TRADDN-DEDD2 |
| XP_019919482.1 | TRADDN-DEDD2             | 1059 | LOC105319902      | mollusca | Crassostrea gigas       | PREDICTED: uncharacterized protein LOC105319902 [Crassostrea gigas]              | GCF_000297895.1 | TRADDN-DEDD2 |
| XP_022312839.1 | TRADDN-DEDD2             | 959  | LOC111117894      | mollusca | Crassostrea virginica   | uncharacterized protein LOC111117894 [Crassostrea virginica]                     | GCF_002022765.2 | TRADDN-DEDD2 |
| XP_009061487.1 | TRADDN-DEDD2             | 1132 | LOTGIDRAFT_166189 | mollusca | Lottia gigantea         | hypothetical protein LOTGIDRAFT_166189 [Lottia gigantea]                         | GCF_000327385.1 | TRADDN-DEDD2 |
| XP_021368028.1 | TRADDN-DEDD2             | 1153 | LOC110459884      | mollusca | Mizuhopecten yessoensis | uncharacterized protein LOC110459884 [Mizuhopecten yessoensis]                   | GCF_002113885.1 | TRADDN-DEDD2 |
| PVD26877.1     | TRADDN-DEDD2             | 256  | C0Q70_12025       | mollusca | Pomacea canaliculata    | hypothetical protein C0Q70_12025 [Pomacea canaliculata]                          | GCA_003073045.1 | TRADDN-DEDD2 |
| PVD36255.1     | TRADDN-DEDD2             | 776  | C0Q70_03233       | mollusca | Pomacea canaliculata    | hypothetical protein C0Q70_03233 [Pomacea canaliculata]                          | GCA_003073045.1 | TRADDN-DEDD2 |
| XP_025081834.1 | TRADDN-DEDD2             | 431  | LOC112556745      | mollusca | Pomacea canaliculata    | uncharacterized protein LOC112556745 isoform X2 [Pomacea canaliculata]           | GCF_003073045.1 | TRADDN-DEDD2 |
| XP_005100108.1 | TRADDN-DEDD2+Coiled-coil | 374  | LOC101858718      | mollusca | Aplysia californica     | PREDICTED: uncharacterized protein LOC101858718 isoform X1 [Aplysia californica] | GCF_000002075.1 | TRADDN-DEDD2 |
| XP_005100110.1 | TRADDN-DEDD2+Coiled-coil | 357  | LOC101858718      | mollusca | Aplysia californica     | PREDICTED: uncharacterized protein LOC101858718 isoform X3 [Aplysia californica] | GCF_000002075.1 | TRADDN-DEDD2 |
| XP_012938929.1 | TRADDN-DEDD2+Coiled-coil | 365  | LOC101858718      | mollusca | Aplysia californica     | PREDICTED: uncharacterized protein LOC101858718 isoform X2 [Aplysia californica] | GCF_000002075.1 | TRADDN-DEDD2 |
| XP_011445141.1 | TRADDN-DEDD2+Coiled-coil | 363  | LOC105340663      | mollusca | Crassostrea gigas       | PREDICTED: uncharacterized protein LOC105340663 isoform X1 [Crassostrea gigas]   | GCF_000297895.1 | TRADDN-DEDD2 |
| XP_011445142.1 | TRADDN-DEDD2+Coiled-coil | 349  | LOC105340663      | mollusca | Crassostrea gigas       | PREDICTED: uncharacterized protein LOC105340663 isoform X2 [Crassostrea gigas]   | GCF_000297895.1 | TRADDN-DEDD2 |
| XP_011445144.1 | TRADDN-DEDD2+Coiled-coil | 308  | LOC105340663      | mollusca | Crassostrea gigas       | PREDICTED: uncharacterized protein LOC105340663 isoform X3 [Crassostrea gigas]   | GCF_000297895.1 | TRADDN-DEDD2 |



| acc            | architecture                 | len  | gen.name          | taxend   | species                 | define                                                                                     | gca             | clade        |
|----------------|------------------------------|------|-------------------|----------|-------------------------|--------------------------------------------------------------------------------------------|-----------------|--------------|
| XP_022317278.1 | TRADDN-DEDD2+Coiled-coil     | 363  | LOC111120669      | mollusca | Crassostrea virginica   | uncharacterized protein<br>LOC111120669 isoform X1                                         | GCF_002022765.2 | TRADDN-DEDD2 |
| XP_022317286.1 | TRADDN-DEDD2+Coiled-coil     | 349  | LOC111120669      | mollusca | Crassostrea virginica   | [Crassostrea virginica]<br>uncharacterized protein<br>LOC111120669 isoform X2              | GCF_002022765.2 | TRADDN-DEDD2 |
| XP_022321425.1 | TRADDN-DEDD2+Coiled-coil     | 363  | LOC111123411      | mollusca | Crassostrea virginica   | [Crassostrea virginica]<br>uncharacterized protein<br>LOC111123411 isoform X1              | GCF_002022765.2 | TRADDN-DEDD2 |
| XP_022321434.1 | TRADDN-DEDD2+Coiled-coil     | 349  | LOC111123411      | mollusca | Crassostrea virginica   | [Crassostrea virginica]<br>uncharacterized protein<br>LOC111123411 isoform X2              | GCF_002022765.2 | TRADDN-DEDD2 |
| XP_009046635.1 | TRADDN-DEDD2+Coiled-coil     | 357  | LOTGIDRAFT_237861 | mollusca | Lottia gigantea         | [Crassostrea virginica]<br>hypothetical protein<br>LOTGIDRAFT_237861 [Lottia<br>gigantea]  | GCF_000327385.1 | TRADDN-DEDD2 |
| XP_021343490.1 | TRADDN-DEDD2+Coiled-coil     | 353  | LOC110443545      | mollusca | Mizuhopecten yessoensis | uncharacterized protein<br>LOC110443545 [Mizuhopecten<br>yessoensis]                       | GCF_002113885.1 | TRADDN-DEDD2 |
| XP_025081831.1 | TRADDN-DEDD2+CTD             | 572  | LOC112556745      | mollusca | Pomacea canaliculata    | uncharacterized protein<br>LOC112556745 isoform X1 [Pomacea<br>canaliculata]               | GCF_003073045.1 | TRADDN-DEDD2 |
| OWF39790.1     | TRADDN-DEDD2+low-complexity  | 1112 | KP79_PYT15425     | mollusca | Mizuhopecten yessoensis | protein FAM47C [Mizuhopecten<br>yessoensis]                                                | GCA_002113885.2 | TRADDN-DEDD2 |
| EKC30605.1     | TRADDN-DEDD2+LRRs            | 974  | CGI_10012965      | mollusca | Crassostrea gigas       | Protein NLRC3 [Crassostrea gigas]                                                          | -               | TRADDN-DEDD2 |
| XP_021375602.1 | TRADDN-DEDD2+vWA+Coiled-coil | 772  | LOC110464614      | mollusca | Mizuhopecten yessoensis | uncharacterized protein<br>LOC110464614, partial<br>[Mizuhopecten yessoensis]              | GCF_002113885.1 | TRADDN-DEDD2 |
| XP_005096372.1 | TRADDN-NCOA6                 | 2543 | LOC101862496      | mollusca | Aplysia californica     | PREDICTED: mucin-17-like isoform<br>X2 [Aplysia californica]                               | GCF_000002075.1 | TRADDN-NCOA6 |
| XP_012936779.1 | TRADDN-NCOA6                 | 2552 | LOC101862496      | mollusca | Aplysia californica     | PREDICTED: mucin-17-like isoform<br>X1 [Aplysia californica]                               | GCF_000002075.1 | TRADDN-NCOA6 |
| XP_013075031.1 | TRADDN-NCOA6                 | 2174 | LOC106061427      | mollusca | Biomphalaria glabrata   | PREDICTED: serine-rich adhesin<br>for platelets-like isoform X1<br>[Biomphalaria glabrata] | GCF_000457365.1 | TRADDN-NCOA6 |
| XP_013075040.1 | TRADDN-NCOA6                 | 2154 | LOC106061427      | mollusca | Biomphalaria glabrata   | PREDICTED: serine-rich adhesin<br>for platelets-like isoform X2<br>[Biomphalaria glabrata] | GCF_000457365.1 | TRADDN-NCOA6 |
| XP_013075047.1 | TRADDN-NCOA6                 | 2152 | LOC106061427      | mollusca | Biomphalaria glabrata   | PREDICTED: serine-rich adhesin<br>for platelets-like isoform X3<br>[Biomphalaria glabrata] | GCF_000457365.1 | TRADDN-NCOA6 |
| XP_011412379.2 | TRADDN-NCOA6                 | 322  | LOC105317436      | mollusca | Crassostrea gigas       | PREDICTED: uncharacterized<br>protein LOC105317436 [Crassostrea<br>gigas]                  | GCF_000297895.1 | TRADDN-NCOA6 |
| XP_011421349.2 | TRADDN-NCOA6                 | 158  | LOC105323982      | mollusca | Crassostrea gigas       | PREDICTED: uncharacterized<br>protein LOC105323982, partial<br>[Crassostrea gigas]         | GCF_000297895.1 | TRADDN-NCOA6 |
| XP_011439656.1 | TRADDN-NCOA6                 | 574  | LOC105336877      | mollusca | Crassostrea gigas       | PREDICTED: uncharacterized<br>protein LOC105336877 [Crassostrea<br>gigas]                  | GCF_000297895.1 | TRADDN-NCOA6 |
| XP_011454817.1 | TRADDN-NCOA6                 | 1680 | LOC105347421      | mollusca | Crassostrea gigas       | PREDICTED: mucin-12-like isoform<br>X1 [Crassostrea gigas]                                 | GCF_000297895.1 | TRADDN-NCOA6 |

| acc            | architecture | len  | gen.name          | taxend   | species                 | define                                                                              | gca             | clade        |
|----------------|--------------|------|-------------------|----------|-------------------------|-------------------------------------------------------------------------------------|-----------------|--------------|
| XP_011454818.1 | TRADDN-NCOA6 | 1673 | LOC105347421      | mollusca | Crassostrea gigas       | PREDICTED: mucin-12-like isoform X2 [Crassostrea gigas]                             | GCF_000297895.1 | TRADDN-NCOA6 |
| XP_011454819.1 | TRADDN-NCOA6 | 1606 | LOC105347421      | mollusca | Crassostrea gigas       | PREDICTED: uncharacterized protein LOC105347421 isoform X3 [Crassostrea gigas]      | GCF_000297895.1 | TRADDN-NCOA6 |
| XP_019930063.1 | TRADDN-NCOA6 | 135  | LOC105346222      | mollusca | Crassostrea gigas       | PREDICTED: uncharacterized protein LOC105346222 [Crassostrea gigas]                 | GCF_000297895.1 | TRADDN-NCOA6 |
| XP_022314769.1 | TRADDN-NCOA6 | 1676 | LOC111119183      | mollusca | Crassostrea virginica   | uncharacterized protein LOC111119183 isoform X1 [Crassostrea virginica]             | GCF_002022765.2 | TRADDN-NCOA6 |
| XP_022314770.1 | TRADDN-NCOA6 | 1669 | LOC111119183      | mollusca | Crassostrea virginica   | uncharacterized protein LOC111119183 isoform X2 [Crassostrea virginica]             | GCF_002022765.2 | TRADDN-NCOA6 |
| XP_022314771.1 | TRADDN-NCOA6 | 1669 | LOC111119183      | mollusca | Crassostrea virginica   | uncharacterized protein LOC111119183 isoform X3 [Crassostrea virginica]             | GCF_002022765.2 | TRADDN-NCOA6 |
| XP_022314773.1 | TRADDN-NCOA6 | 1602 | LOC111119183      | mollusca | Crassostrea virginica   | uncharacterized protein LOC111119183 isoform X4 [Crassostrea virginica]             | GCF_002022765.2 | TRADDN-NCOA6 |
| XP_022314889.1 | TRADDN-NCOA6 | 1676 | LOC111119225      | mollusca | Crassostrea virginica   | uncharacterized protein LOC111119225 isoform X1 [Crassostrea virginica]             | GCF_002022765.2 | TRADDN-NCOA6 |
| XP_022314890.1 | TRADDN-NCOA6 | 1669 | LOC111119225      | mollusca | Crassostrea virginica   | uncharacterized protein LOC111119225 isoform X2 [Crassostrea virginica]             | GCF_002022765.2 | TRADDN-NCOA6 |
| XP_022314892.1 | TRADDN-NCOA6 | 1669 | LOC111119225      | mollusca | Crassostrea virginica   | uncharacterized protein LOC111119225 isoform X3 [Crassostrea virginica]             | GCF_002022765.2 | TRADDN-NCOA6 |
| XP_022314893.1 | TRADDN-NCOA6 | 1602 | LOC111119225      | mollusca | Crassostrea virginica   | uncharacterized protein LOC111119225 isoform X4 [Crassostrea virginica]             | GCF_002022765.2 | TRADDN-NCOA6 |
| XP_009061142.1 | TRADDN-NCOA6 | 1658 | LOTGIDRAFT_234686 | mollusca | Lottia gigantea         | hypothetical protein LOTGIDRAFT_234686 [Lottia gigantea]                            | GCF_000327385.1 | TRADDN-NCOA6 |
| XP_021343526.1 | TRADDN-NCOA6 | 1999 | LOC110443570      | mollusca | Mizuhopecten yessoensis | uncharacterized protein LOC110443570 [Mizuhopecten yessoensis]                      | GCF_002113885.1 | TRADDN-NCOA6 |
| XP_014778602.1 | TRADDN-NCOA6 | 2269 | LOC106875131      | mollusca | Octopus bimaculoides    | PREDICTED: serine-rich adhesin for platelets-like isoform X1 [Octopus bimaculoides] | GCF_001194135.1 | TRADDN-NCOA6 |
| XP_014778605.1 | TRADDN-NCOA6 | 2268 | LOC106875131      | mollusca | Octopus bimaculoides    | PREDICTED: serine-rich adhesin for platelets-like isoform X2 [Octopus bimaculoides] | GCF_001194135.1 | TRADDN-NCOA6 |
| XP_025109424.1 | TRADDN-NCOA6 | 2637 | LOC112573353      | mollusca | Pomacea canaliculata    | uncharacterized protein LOC112573353 isoform X1 [Pomacea canaliculata]              | GCF_003073045.1 | TRADDN-NCOA6 |
| XP_025109427.1 | TRADDN-NCOA6 | 2631 | LOC112573353      | mollusca | Pomacea canaliculata    | uncharacterized protein LOC112573353 isoform X2 [Pomacea canaliculata]              | GCF_003073045.1 | TRADDN-NCOA6 |

| acc            | architecture                          | len  | gen.name     | taxend   | species                    | define                                                                       | gca             | clade        |
|----------------|---------------------------------------|------|--------------|----------|----------------------------|------------------------------------------------------------------------------|-----------------|--------------|
| XP_011454771.2 | TRADDN-NCOA6+BBOX+BBOX+Beta-propeller | 1171 | LOC105347399 | mollusca | Crassostrea gigas          | PREDICTED: uncharacterized protein LOC105347399 [Crassostrea gigas]          | GCF_000297895.1 | TRADDN-NCOA6 |
| XP_011448221.2 | TRADDN-NCOA6+DED+domain1              | 467  | LOC105342858 | mollusca | Crassostrea gigas          | PREDICTED: uncharacterized protein LOC105342858, partial [Crassostrea gigas] | GCF_000297895.1 | TRADDN-NCOA6 |
| EKC37751.1     | TRADDN-NCOA6+ROT                      | 336  | CGI_10011599 | mollusca | Crassostrea gigas          | hypothetical protein CGI_10011599 [Crassostrea gigas]                        | -               | TRADDN-NCOA6 |
| XP_011428649.2 | TRADDN-NCOA6+UPF0515(ZBD)             | 344  | LOC105329165 | mollusca | Crassostrea gigas          | PREDICTED: repressor of yield of DENV protein homolog [Crassostrea gigas]    | GCF_000297895.1 | TRADDN-NCOA6 |
| KHN84334.1     | TRADDN-NCOA6                          | 1626 | Tean_12392   | nematoda | Toxocara canis             | hypothetical protein Tean_12392 [Toxocara canis]                             | GCA_000803305.1 | TRADDN-NCOA6 |
| KRY57978.1     | TRADDN-NCOA6                          | 600  | T03_7673     | nematoda | Trichinella britovi        | hypothetical protein T03_7673 [Trichinella britovi]                          | GCA_001447585.1 | TRADDN-NCOA6 |
| KRY57979.1     | TRADDN-NCOA6                          | 580  | T03_7673     | nematoda | Trichinella britovi        | hypothetical protein T03_7673 [Trichinella britovi]                          | GCA_001447585.1 | TRADDN-NCOA6 |
| KRX50653.1     | TRADDN-NCOA6                          | 729  | T05_3233     | nematoda | Trichinella murrelli       | hypothetical protein T05_3233 [Trichinella murrelli]                         | GCA_001447425.1 | TRADDN-NCOA6 |
| KRZ54558.1     | TRADDN-NCOA6                          | 659  | T02_7117     | nematoda | Trichinella nativa         | hypothetical protein T02_7117 [Trichinella nativa]                           | GCA_001447565.1 | TRADDN-NCOA6 |
| KRX17925.1     | TRADDN-NCOA6                          | 663  | T07_14018    | nematoda | Trichinella nelsoni        | hypothetical protein T07_14018 [Trichinella nelsoni]                         | GCA_001447455.1 | TRADDN-NCOA6 |
| KRZ69554.1     | TRADDN-NCOA6                          | 613  | T10_4646     | nematoda | Trichinella papuae         | hypothetical protein T10_4646 [Trichinella papuae]                           | GCA_001447755.1 | TRADDN-NCOA6 |
| KRY13562.1     | TRADDN-NCOA6                          | 641  | T12_16605    | nematoda | Trichinella patagoniensis  | hypothetical protein T12_16605 [Trichinella patagoniensis]                   | GCA_001447655.1 | TRADDN-NCOA6 |
| KRX91511.1     | TRADDN-NCOA6                          | 621  | T4E_7662     | nematoda | Trichinella pseudospiralis | hypothetical protein T4E_7662 [Trichinella pseudospiralis]                   | GCA_001447445.1 | TRADDN-NCOA6 |
| KRX91512.1     | TRADDN-NCOA6                          | 649  | T4E_7662     | nematoda | Trichinella pseudospiralis | hypothetical protein T4E_7662 [Trichinella pseudospiralis]                   | GCA_001447445.1 | TRADDN-NCOA6 |
| KRY68453.1     | TRADDN-NCOA6                          | 649  | T4A_7215     | nematoda | Trichinella pseudospiralis | hypothetical protein T4A_7215 [Trichinella pseudospiralis]                   | GCA_001447675.1 | TRADDN-NCOA6 |
| KRY68454.1     | TRADDN-NCOA6                          | 649  | T4A_7215     | nematoda | Trichinella pseudospiralis | hypothetical protein T4A_7215 [Trichinella pseudospiralis]                   | GCA_001447675.1 | TRADDN-NCOA6 |
| KRY86157.1     | TRADDN-NCOA6                          | 649  | T4D_918      | nematoda | Trichinella pseudospiralis | hypothetical protein T4D_918 [Trichinella pseudospiralis]                    | GCA_001447575.1 | TRADDN-NCOA6 |
| KRZ25843.1     | TRADDN-NCOA6                          | 648  | T4B_5690     | nematoda | Trichinella pseudospiralis | hypothetical protein T4B_5690 [Trichinella pseudospiralis]                   | GCA_001447725.1 | TRADDN-NCOA6 |
| KRZ25844.1     | TRADDN-NCOA6                          | 648  | T4B_5690     | nematoda | Trichinella pseudospiralis | hypothetical protein T4B_5690 [Trichinella pseudospiralis]                   | GCA_001447725.1 | TRADDN-NCOA6 |
| KRX75463.1     | TRADDN-NCOA6                          | 586  | T06_6177     | nematoda | Trichinella sp. T6         | hypothetical protein T06_6177 [Trichinella sp. T6]                           | GCA_001447435.1 | TRADDN-NCOA6 |
| KRX75464.1     | TRADDN-NCOA6                          | 643  | T06_6177     | nematoda | Trichinella sp. T6         | hypothetical protein T06_6177 [Trichinella sp. T6]                           | GCA_001447435.1 | TRADDN-NCOA6 |
| KRZ93493.1     | TRADDN-NCOA6                          | 729  | T08_6434     | nematoda | Trichinella sp. T8         | hypothetical protein T08_6434 [Trichinella sp. T8]                           | GCA_001447745.1 | TRADDN-NCOA6 |
| KRX60436.1     | TRADDN-NCOA6                          | 725  | T09_11053    | nematoda | Trichinella sp. T9         | hypothetical protein T09_11053 [Trichinella sp. T9]                          | GCA_001447505.1 | TRADDN-NCOA6 |
| KRY31454.1     | TRADDN-NCOA6                          | 754  | T01_13249    | nematoda | Trichinella spiralis       | hypothetical protein T01_13249 [Trichinella spiralis]                        | GCA_001447595.1 | TRADDN-NCOA6 |

| acc            | architecture            | len  | gen.name         | taxend   | species                  | define                                                      | gca             | clade                     |
|----------------|-------------------------|------|------------------|----------|--------------------------|-------------------------------------------------------------|-----------------|---------------------------|
| KRY31455.1     | TRADDN-NCOA6            | 726  | T01_13249        | nematoda | Trichinella spiralis     | hypothetical protein T01_13249<br>[Trichinella spiralis]    | GCA_001447595.1 | TRADDN-NCOA6              |
| XP_003371284.1 | TRADDN-NCOA6            | 653  | Tsp_09519        | nematoda | Trichinella spiralis     | hypothetical protein Tsp_09519<br>[Trichinella spiralis]    | GCF_000181795.1 | TRADDN-NCOA6              |
| KRZ15489.1     | TRADDN-NCOA6            | 658  | T11_7060         | nematoda | Trichinella zimbabwensis | hypothetical protein T11_7060<br>[Trichinella zimbabwensis] | GCA_001447665.1 | TRADDN-NCOA6              |
| KRZ15490.1     | TRADDN-NCOA6            | 637  | T11_7060         | nematoda | Trichinella zimbabwensis | hypothetical protein T11_7060<br>[Trichinella zimbabwensis] | GCA_001447665.1 | TRADDN-NCOA6              |
| KFD53706.1     | TRADDN-NCOA6            | 805  | M513_05411       | nematoda | Trichuris suis           | hypothetical protein M513_05411<br>[Trichuris suis]         | GCA_000701005.1 | TRADDN-NCOA6              |
| KFD72418.1     | TRADDN-NCOA6            | 1177 | M514_05411       | nematoda | Trichuris suis           | hypothetical protein M514_05411<br>[Trichuris suis]         | GCA_000701025.1 | TRADDN-NCOA6              |
| EDV28184.1     | N-ter+TRADDN-Bac+FAM124 | 401  | TRIADDRAFT_53522 | placozoa | Trichoplax adhaerens     | predicted protein [Trichoplax<br>adhaerens]                 | GCA_000150275.1 | TRADDN-Bacterial-<br>like |
| XP_002110018.1 | N-ter+TRADDN-Bac+FAM124 | 401  | TRIADDRAFT_53522 | placozoa | Trichoplax adhaerens     | predicted protein [Trichoplax<br>adhaerens]                 | GCF_000150275.1 | TRADDN-Bacterial-<br>like |

Gene neighborhoods and domain architectures of the bacterial GT4-like glycosyltransferases described in this study

| acc        | operon                                                                                 | architecture                | len  | gen.name         | taxend                   | species                            | define                                                                                      | gca             |
|------------|----------------------------------------------------------------------------------------|-----------------------------|------|------------------|--------------------------|------------------------------------|---------------------------------------------------------------------------------------------|-----------------|
| ADU34882.1 | GT4+B12-binding+RADICAL-SAM*→                                                          | GT4+B12-binding+RADICAL-SAM | 1405 | Varpa_0662       | Betapro-<br>teobacteria  | Variovorax<br>paradoxus EPS        | Radical SAM<br>domain protein<br>[Variovorax<br>paradoxus EPS]                              | GCA_000184745.1 |
| AEV82483.1 | WXG+GT4+GT4+REase*→                                                                    | WXG+GT4+GT4+REase           | 4143 | inaW             | Actinobacte-<br>ria      | Actinoplanes sp.<br>SE50/110       | Ice nucleation<br>protein<br>[Actinoplanes sp.<br>SE50/110]                                 | GCA_000237145.1 |
| AMB84622.1 | APATPase+GT4*→                                                                         | APATPase+GT4                | 1299 | AWM79_04595      | Gammapro-<br>teobacteria | Pseudomonas<br>agarici             | hypothetical<br>protein<br>AWM79_04595<br>[Pseudomonas<br>agarici]                          | GCA_001543125.1 |
| ANP51773.1 | Caspase+NACHT+GT4*→    <-?<-?<-?  ?→?→    <-?<-MFS                                     | Caspase+NACHT+GT4           | 1134 | AVL59_21225      | Actinobacte-<br>ria      | Streptomyces<br>griseochromogenes  | hypothetical<br>protein<br>AVL59_21225<br>[Streptomyces<br>griseochromo-<br>genes]          | GCA_001542625.2 |
| AWZ06155.1 | Caspase+NACHT+GT4*→    <-?<-?<-?<-?  APATPase→                                         | Caspase+NACHT+GT4           | 1156 | DRB89_17720      | Actinobacte-<br>ria      | Streptomyces sp.<br>ICC4           | hypothetical<br>protein<br>DRB89_17720<br>[Streptomyces sp.<br>ICC4]                        | GCA_003287915.1 |
| BAO61700.1 | SWACOS+GT4*→?→?→    <-?<-?  MFS→                                                       | SWACOS+GT4                  | 1084 | PPC_2353         | Gammapro-<br>teobacteria | Pseudomonas<br>protegens Cab57     | hypothetical<br>protein<br>PPC_2353<br>[Pseudomonas<br>protegens Cab57]                     | GCA_000828695.1 |
| CEL20906.1 | ART+Caspase+GT4*→?→ GT4→                                                               | ART+Caspase+GT4             | 1145 | BN1199_RS39095   | Actinobacte-<br>ria      | Kibdelosporangium sp.<br>MJ126-NF4 | hypothetical<br>protein [Kibde-<br>losporangium sp.<br>MJ126-NF4]                           | GCA_000826545.1 |
| CUU59694.1 | TPR+Caspase→ TPR+Caspase→    <-CATASP  CATRA-N+CATRA-C+GT4*→    <-?  HTH+APATPase+TPR→ | CATRA-N+CATRA-C+GT4         | 904  | Ga0074812_13074  | Actinobacte-<br>ria      | Frankia irregularis                | Glycosyltrans-<br>ferase involved in<br>cell wall<br>bisyntesis<br>[Frankia<br>irregularis] | GCA_001536285.1 |
| EIV94947.1 | CATRA-N+CATRA-C+GT4*→    <-TPR+Caspase<-?<-?<-?<-?  APATPase+TPR→ CATASP→              | CATRA-N+CATRA-C+GT4         | 810  | FraQA3DRAFT_4713 | Actinobacte-<br>ria      | Frankia sp. QA3                    | glycosyltrans-<br>ferase [Frankia sp.<br>QA3]                                               | GCA_000262465.1 |

| acc        | operon                                                                       | architecture                  | len  | gen.name        | taxend                | species                                | define                                                                  | gca             |
|------------|------------------------------------------------------------------------------|-------------------------------|------|-----------------|-----------------------|----------------------------------------|-------------------------------------------------------------------------|-----------------|
| EKX63918.1 | ZetaToxin+GT4+NUDIX+ART+NTase*→?→?→?→   <-Caspase<-?  ?→?→?→   <-NLPC        | ZetaToxin+GT4+NUDIX+ART+NTase | 2156 | STRIP9103_04937 | Actinobacteria        | Streptomyces ipomoeae 91-03            | hydrolase, NUDIX family [Streptomyces ipomoeae 91-03]                   | GCA_000317595.1 |
| EWM12074.1 | <-CATASP  CATRA-N+CATRA-C+GT4*→   <-HTH+APATPase+TPR                         | CATRA-N+CATRA-C+GT4           | 750  | KUTG_02378      | Actinobacteria        | Kutzneria sp. 744                      | LigA protein [Kutzneria sp. 744]                                        | GCA_000568255.1 |
| GBE24927.1 | Asparaginase_II→ Acetyltransf_6→ GT4*→?→?→?→   <-?<-SIG+TM+TM+TM<-THUMP+ThiI | GT4                           | 407  | mshA            | unclassified Bacteria | bacterium BMS3Bbin02                   | D-inositol 3-phosphate glycosyltransferase [bacterium BMS3Bbin02]       | GCA_002898115.1 |
| HBN24878.1 | GT4*→                                                                        | GT4                           | 721  | DD447_07855     | Firmicutes            | Lachnospiraceae bacterium              | TPA: hypothetical protein DD447_07855 [Lachnospiraceae bacterium]       | GCA_003503295.1 |
| HCI14011.1 | GT4+APATPase+TPR*→                                                           | GT4+APATPase+TPR              | 1340 | DFK12_08625     | Betaproteobacteria    | Gallionellaceae bacterium              | TPA: hypothetical protein DFK12_08625 [Gallionellaceae bacterium]       | GCA_003521785.1 |
| HCS09332.1 | <-MODE-HTH+PBPI  ?→   <-?<-PSE<-PrpF  ?→ PSE→ STAND+TPR+GT4*→                | STAND+TPR+GT4                 | 1081 | DIW67_19725     | Gammaproteobacteria   | Pseudomonas sp.                        | TPA: glycosyltransferase [Pseudomonas sp.]                              | GCA_003531165.1 |
| HDL41796.1 | GT4*→                                                                        | GT4                           | 345  | ENG98_02120     | Actinobacteria        | Actinobacteria bacterium               | TPA: glycosyltransferase, partial [Actinobacteria bacterium]            | GCA_011041235.1 |
| KDN80799.1 | MNS+GT4*→   <-?  ?→ ABC_tran→                                                | MNS+GT4                       | 1137 | KCH_74340       | Actinobacteria        | Kitasatospora cheerisanensis KCTC 2395 | hypothetical protein KCH_74340 [Kitasatospora cheerisanensis KCTC 2395] | GCA_000696185.1 |
| KNY05162.1 | GT4*→                                                                        | GT4                           | 533  | AKH00_12305     | Actinobacteria        | Microbacterium sp. GCS4                | hypothetical protein AKH00_12305 [Microbacterium sp. GCS4]              | GCA_001262495.1 |
| KOX13006.1 | <-ABC_tran  ?→?→?→   <-?<-TIR+NACHT  HTH+APATPase+TPR+GT4*→                  | HTH+APATPase+TPR+GT4          | 1158 | ADK67_45665     | Actinobacteria        | Saccharothrix sp. NRRL B-16348         | NTPase [Saccharothrix sp. NRRL B-16348]                                 | GCA_001280085.1 |
| KQM59620.1 | GT4*→   <-TRPR-HTH+PBPI<-?<-?<-?<-?  PSE→?→ PfkB→                            | GT4                           | 155  | ASE64_09860     | Actinobacteria        | Agreia sp. Leaf210                     | hypothetical protein ASE64_09860 [Agreia sp. Leaf210]                   | GCA_001421485.1 |

| acc          | operon                                                                                   | architecture                     | len  | gen.name    | taxend              | species                    | define                                                     | gca             |
|--------------|------------------------------------------------------------------------------------------|----------------------------------|------|-------------|---------------------|----------------------------|------------------------------------------------------------|-----------------|
| KQW27056.1   | STAND+GT4*→                                                                              | STAND+GT4                        | 1005 | ASC85_27055 | Gammaproteobacteria | Pseudomonas sp. Root401    | hypothetical protein ASC85_27055 [Pseudomonas sp. Root401] | GCA_001425105.1 |
| KVF32402.1   | <-SIG+RCDG1+YidC_periplas+60KD_IMP<-?<-?  ?→?→?→ GT4+B12-binding+RADICAL-SAM*→   <-rve_3 | GT4+B12-binding+RADICAL-SAM      | 1400 | WJ08_12515  | Betaproteobacteria  | Burkholderia vietnamiensis | radical SAM protein [Burkholderia vietnamiensis]           | GCA_001524025.1 |
| KVM90153.1   | GT4+B12-binding+RADICAL-SAM*→                                                            | GT4+B12-binding+RADICAL-SAM      | 1404 | WT05_03580  | Betaproteobacteria  | Burkholderia stagnalis     | radical SAM protein [Burkholderia stagnalis]               | GCA_001527545.1 |
| KVM94412.1   | TniB→?→ NLPC→   <-?  ?→ GT4+B12-binding+RADICAL-SAM*→                                    | GT4+B12-binding+RADICAL-SAM      | 1404 | WT07_28140  | Betaproteobacteria  | Burkholderia stagnalis     | radical SAM protein [Burkholderia stagnalis]               | GCA_001527585.1 |
| KVX13946.1   | GT4*→   <-?  ABhydrolase→   <-TRANSGLUTAMINASE                                           | GT4                              | 282  | WL03_19390  | Betaproteobacteria  | Burkholderia ubonensis     | hypothetical protein WL03_19390 [Burkholderia ubonensis]   | GCA_001539165.1 |
| KVZ11040.1   | GT4+APATPase+TPR+TPR*→                                                                   | GT4+APATPase+TPR+TPR             | 1278 | WL11_04565  | Betaproteobacteria  | Burkholderia ubonensis     | hypothetical protein WL11_04565 [Burkholderia ubonensis]   | GCA_001530465.1 |
| KWI84975.1   | GT4*→   <-?  ABhydrolase→   <-TRANSGLUTAMINASE                                           | GT4                              | 325  | WM08_23745  | Betaproteobacteria  | Burkholderia ubonensis     | hypothetical protein WM08_23745 [Burkholderia ubonensis]   | GCA_001534135.1 |
| KWK82218.1   | NACHT+TPR+GT4*→                                                                          | NACHT+TPR+GT4                    | 1024 | WM17_17155  | Betaproteobacteria  | Burkholderia ubonensis     | hypothetical protein WM17_17155 [Burkholderia ubonensis]   | GCA_001533745.1 |
| MBA3007143.1 | APATPase+GT4+TPR+TPR+TPR+TPR+TPR*→                                                       | APATPase+GT4+TPR+TPR+TPR+TPR+TPR | 1488 | FP810_11305 | Deltaproteobacteria | Desulfocapsa sp.           | tetratricopeptide repeat protein [Desulfocapsa sp.]        | GCA_013792135.1 |
| MBA3548505.1 | GT4*→                                                                                    | GT4                              | 125  | H0T76_18640 | Deltaproteobacteria | Nannocystis sp.            | glycosyltransferase [Nannocystis sp.]                      | GCA_013812955.1 |
| MBS82255.1   | NACHT+GT4*→?→?→?→   <-?<-?<-SIG+rve                                                      | NACHT+GT4                        | 1659 | CMO32_42310 | Betaproteobacteria  | Variovorax sp.             | hypothetical protein CMO32_42310 [Variovorax sp.]          | GCA_002729445.1 |

| acc        | operon                                                                                  | architecture                           | len  | gen.name    | taxend              | species                                        | define                                                                            | gca             |
|------------|-----------------------------------------------------------------------------------------|----------------------------------------|------|-------------|---------------------|------------------------------------------------|-----------------------------------------------------------------------------------|-----------------|
| MQY06528.1 | REase+SFI-ATPase→?→?→    <-?  ?→    <-?  GT4+APATPase+TPR+TPR*→                         | GT4+APATPase+TPR+TPR                   | 1104 | mshA_10     | Actinobacteria      | Actinomadura sp. RB68                          | D-inositol-3-phosphate glycosyltransferase [Actinomadura sp. RB68]                | GCA_009604375.1 |
| MQY24997.1 | ESX-1_EspG→    <-?<-?  ?→?→?→ WXG+TOXIN-PL+ART+Caspase+ZetaToxin+GT4*→                  | WXG+TOXIN-PL+ART+Caspase+ZetaToxin+GT4 | 3249 | mshA_3      | Actinobacteria      | Nocardia sp. RB56                              | D-inositol-3-phosphate glycosyltransferase [Nocardia sp. RB56]                    | GCA_009604425.1 |
| MSV29911.1 | GT4+APATPase+BetaPropeller*→                                                            | GT4+APATPase+BetaPropeller             | 1058 | EXQ52_14375 | Acidobacteria       | Bryobacteriales bacterium                      | glycosyltransferase [Bryobacteriales bacterium]                                   | GCA_009697455.1 |
| MWJ13606.1 | ABC_tran→?→    <-?  GT4*→    <-?  ?→?→?→    <-?  tRNA→?→ Pribosyltran_N+Pribosyl_synth→ | GT4                                    | 267  | DOT98_12255 | Actinobacteria      | Clavibacter michiganensis subsp. michiganensis | hypothetical protein DOT98_12255 [Clavibacter michiganensis subsp. michiganensis] | GCA_009793225.1 |
| NED51435.1 | GT4*→                                                                                   | GT4                                    | 88   | G3I24_11000 | Actinobacteria      | Micromonospora aurantiaca                      | glycosyl transferase family 1, partial [Micromonospora aurantiaca]                | GCA_010550585.1 |
| NNJ62389.1 | DUF4913→?→ GT4*→                                                                        | GT4                                    | 464  | HKP61_15900 | Actinobacteria      | Dactylosporangium sp.                          | glycosyltransferase family 4 protein [Dactylosporangium sp.]                      | GCA_013041765.1 |
| NOX21677.1 | Asparaginase_II→ Acetyltransf_6→ GT4*→?→?→    <-?<-SIG+TM+TM+TM<-THUMP+ThiI             | GT4                                    | 407  | GXP36_01090 | Actinobacteria      | Actinobacteria bacterium                       | glycosyltransferase [Actinobacteria bacterium]                                    | GCA_013151445.1 |
| NQZ33933.1 | GT4+APATPase*→                                                                          | GT4+APATPase                           | 841  | HRU06_21905 | Gammaproteobacteria | Oceanospirillaceae bacterium                   | glycosyltransferase, partial [Oceanospirillaceae bacterium]                       | GCA_013215375.1 |
| NTC82454.1 | <-TniB<-?<-?<-?  ?→?→?→ NACHT+GT4*→                                                     | NACHT+GT4                              | 1640 | G6M81_07325 | Alphaproteobacteria | Agrobacterium tumefaciens                      | glycosyltransferase [Agrobacterium tumefaciens]                                   | GCA_013319045.1 |
| NUQ74496.1 | SIR2+TPR+SAVED+GT4*→                                                                    | SIR2+TPR+SAVED+GT4                     | 1362 | HUU21_13150 | Deltaproteobacteria | Polyangiaceae bacterium                        | glycosyltransferase [Polyangiaceae bacterium]                                     | GCA_013360665.1 |



| acc        | operon                                                                                       | architecture                | len  | gen.name    | taxend              | species                              | defline                                                                    | gca             |
|------------|----------------------------------------------------------------------------------------------|-----------------------------|------|-------------|---------------------|--------------------------------------|----------------------------------------------------------------------------|-----------------|
| NUS43770.1 | GT4*→                                                                                        | GT4                         | 631  | HOQ24_08805 | Actinobacteria      | Mycobacteriaceae bacterium           | glycosyltransferase family 4 protein, partial [Mycobacteriaceae bacterium] | GCA_013362555.1 |
| NUS72884.1 | SIG+GT4+ZetaToxin*→                                                                          | SIG+GT4+ZetaToxin           | 750  | HOQ05_05695 | Actinobacteria      | Corynebacteriales bacterium          | glycosyltransferase [Corynebacteriales bacterium]                          | GCA_013362805.1 |
| NUT53093.1 | SWACOS+GT4*→                                                                                 | SWACOS+GT4                  | 1162 | HOV94_38270 | Actinobacteria      | Saccharothrix sp.                    | glycosyltransferase [Saccharothrix sp.]                                    | GCA_013362745.1 |
| OAI03591.1 | GT4+APATPase+TPR*→                                                                           | GT4+APATPase+TPR            | 1115 | A1332_15425 | Gammaproteobacteria | Methylomonas methanica               | hypothetical protein A1332_15425, partial [Methylomonas methanica]         | GCA_001644035.1 |
| ODT28534.1 | GT4*→   <-?<-?  ?→   <-?<-?  ?→ NUDIX→                                                       | GT4                         | 325  | ABS63_03615 | Actinobacteria      | Microbacterium sp. SCN 70-27         | hypothetical protein ABS63_03615 [Microbacterium sp. SCN 70-27]            | GCA_001724425.1 |
| OGS75014.1 | GT4+APATPase+TPR*→                                                                           | GT4+APATPase+TPR            | 1314 | A2063_09475 | Betaproteobacteria  | Gallionellales bacterium GWA2_60_142 | hypothetical protein A2063_09475 [Gallionellales bacterium GWA2_60_142]    | GCA_001801085.1 |
| OKJ80919.1 | <-TPR+Caspase<-CATASP  CATRA-N+CATRA-C+GT4*→ HTH+APATPase+TPR→?→?→   <-?<-CATASP             | CATRA-N+CATRA-C+GT4         | 694  | AMK32_24710 | Actinobacteria      | Streptomyces sp. CB01883             | hypothetical protein AMK32_24710 [Streptomyces sp. CB01883]                | GCA_001905855.1 |
| OLT27035.1 | ZetaToxin+GT4+NUDIX+ART*→                                                                    | ZetaToxin+GT4+NUDIX+ART     | 1451 | BJF83_19460 | Actinobacteria      | Nocardiopsis sp. CNR-923             | hypothetical protein BJF83_19460 [Nocardiopsis sp. CNR-923]                | GCA_001942255.1 |
| ONI48735.1 | <-TPR+Caspase<-CATASP  CATRA-N+CATRA-C+GT4*→ HTH+APATPase+TPR→   <-HTH  ?→?→?→   <-?<-CATASP | CATRA-N+CATRA-C+GT4         | 727  | mshA_4      | Actinobacteria      | Streptomyces sp. IB2014 011-1        | D-inositol 3-phosphate glycosyltransferase [Streptomyces sp. IB2014 011-1] | GCA_001983595.1 |
| OPK01862.1 | GT4+B12-binding+RADICAL-SAM*→                                                                | GT4+B12-binding+RADICAL-SAM | 1407 | BZ164_25460 | Gammaproteobacteria | Pseudomonas veronii                  | hypothetical protein BZ164_25460 [Pseudomonas veronii]                     | GCA_002029325.1 |

| acc        | operon                                        | architecture                | len  | gen.name    | taxend              | species                             | define                                                                               | gca             |
|------------|-----------------------------------------------|-----------------------------|------|-------------|---------------------|-------------------------------------|--------------------------------------------------------------------------------------|-----------------|
| OWQ88588.1 | GT4+HD*→                                      | GT4+HD                      | 1415 | CDN99_17225 | Betaproteobacteria  | Roseateles aquatilis                | hypothetical protein<br>CDN99_17225<br>[Roseateles aquatilis]                        | GCA_002205645.1 |
| OXM47905.1 | <-TIR+APATPase  HTH+APATPase+TPR+GT4*→        | HTH+APATPase+TPR+GT4        | 1166 | CFP75_23295 | Actinobacteria      | Amycolatopsis alba DSM 44262        | NTPase<br>[Amycolatopsis alba DSM 44262]                                             | GCA_002234385.1 |
| OZV80564.1 | <-TPR+Caspase  GT4*→?→?→   <-?<-?<-ABC_tran   | GT4                         | 587  | CA850_14545 | Actinobacteria      | Micromonospora echinospora          | hypothetical protein<br>CA850_14545<br>[Micromonospora echinospora]                  | GCA_002266845.1 |
| PBV03828.1 | STAND+GT4*→                                   | STAND+GT4                   | 1006 | CJU35_32055 | Gammaproteobacteria | Pseudomonas aeruginosa              | hypothetical protein<br>CJU35_32055<br>[Pseudomonas aeruginosa]                      | GCA_002326115.1 |
| PJI96546.1 | GT4+B12-binding+RADICAL-SAM*→?→?→   <-?<-LexA | GT4+B12-binding+RADICAL-SAM | 1404 | CLU85_1299  | Betaproteobacteria  | Acidovorax sp. 69                   | radical SAM superfamily enzyme YgiQ (UPF0313 family)<br>[Acidovorax sp. 69]          | GCA_002797445.1 |
| PJO54021.1 | GT4*→                                         | GT4                         | 721  | CR156_18515 | Gammaproteobacteria | Stenotrophomonas lactitubi          | hypothetical protein<br>CR156_18515<br>[Stenotrophomonas lactitubi]                  | GCA_002803515.1 |
| PKN17915.1 | NACHT+GT4*→                                   | NACHT+GT4                   | 1644 | CVU71_10310 | Deltaproteobacteria | Deltaproteobacteria bacterium HGW-6 | hypothetical protein<br>CVU71_10310<br>[Deltaproteobacteria bacterium HGW-6]         | GCA_002840435.1 |
| PKV83308.1 | HTH→?→?→   <-?<-?  Caspase+NACHT+GT4*→        | Caspase+NACHT+GT4           | 1229 | BX283_0808  | Actinobacteria      | Streptomyces sp. TLI_146            | glycosyltransferase involved in cell wall biosynthesis<br>[Streptomyces sp. TLI_146] | GCA_002846415.1 |
| PNA01938.1 | GT4+APATPase+TPR+TPR*→                        | GT4+APATPase+TPR+TPR        | 1383 | C1X79_03750 | Gammaproteobacteria | Pseudomonas sp. FW305-42            | hypothetical protein<br>C1X79_03750<br>[Pseudomonas sp. FW305-42]                    | GCA_002883975.1 |

| acc        | operon                                                                                                                                                              | architecture                                                                                                                                    | len   | gen.name     | taxend              | species                     | define                                                                              | gca             |
|------------|---------------------------------------------------------------------------------------------------------------------------------------------------------------------|-------------------------------------------------------------------------------------------------------------------------------------------------|-------|--------------|---------------------|-----------------------------|-------------------------------------------------------------------------------------|-----------------|
| PRY58656.1 | GT4*→ APATPase+TPR→   <-?<-TRPR-HTH+PBPI                                                                                                                            | GT4                                                                                                                                             | 412   | B0I28_105371 | Actinobacteria      | Glycomyces artemisiae       | glycosyltransferase involved in cell wall biosynthesis [Glycomyces artemisiae]      | GCA_003002955.1 |
| PSR67860.1 | WXG+MPTase→ WXG+LuxR-HTH+LuxR-HTH+LuxR-HTH+LuxR-HTH+TetR-HTH+TetR-HTH+LuxR-HTH+LuxR-HTH+LexA-HTH+LuxR-HTH+LuxR-HTH+LuxR-HTH+LuxR-HTH+LuxR-HTH+PP2C*→?→ ABhydrolase→ | WXG+LuxR-HTH+LuxR-HTH+LuxR-HTH+LuxR-HTH+TetR-HTH+TetR-HTH+LuxR-HTH+LuxR-HTH+LexA-HTH+LuxR-HTH+LuxR-HTH+LuxR-HTH+LuxR-HTH+LuxR-HTH+LuxR-HTH+PP2C | 14198 | C8258_13415  | Actinobacteria      | Nocardia sp. MDA0666        | hypothetical protein C8258_13415 [Nocardia sp. MDA0666]                             | GCA_003023875.1 |
| PXX02325.1 | GT4+B12-binding+RADICAL-SAM*→                                                                                                                                       | GT4+B12-binding+RADICAL-SAM                                                                                                                     | 1404  | C7400_1582   | Betaproteobacteria  | Paraburkholderia tropica    | radical SAM superfamily enzyme YgiQ (UPF0313 family) [Paraburkholderia tropica]     | GCA_003201665.1 |
| PZM02119.1 | <-MODE-HTH+PBPII  ?→   <-MODE-HTH+PBPII  ?→?→?→ NACHT+GT4*→                                                                                                         | NACHT+GT4                                                                                                                                       | 1624  | CPJ17_11030  | Alphaproteobacteria | Rhizobium tumorigenes       | hypothetical protein CPJ17_11030 [Rhizobium tumorigenes]                            | GCA_003240565.1 |
| REF53875.1 | SWACOS+GT4*→   <-?<-MFS                                                                                                                                             | SWACOS+GT4                                                                                                                                      | 1165  | BX279_1810   | Actinobacteria      | Streptomyces sp. Ag82_O1-9  | glycosyltransferase involved in cell wall biosynthesis [Streptomyces sp. Ag82_O1-9] | GCA_003386845.1 |
| RII01628.1 | STAND→?→?→ DUF4913→   <-AbiEii<-AbiEi_4  ?→ GT4*→?→ AbiEi_4→                                                                                                        | GT4                                                                                                                                             | 476   | NI17_16340   | Actinobacteria      | Thermobifida halotolerans   | hypothetical protein NI17_16340 [Thermobifida halotolerans]                         | GCA_003574835.1 |
| RKS05362.1 | <-APATPase+TPR  ?→ GT4*→                                                                                                                                            | GT4                                                                                                                                             | 412   | DFP74_0957   | Actinobacteria      | Nocardiopsis sp. Huas11     | glycosyltransferase involved in cell wall biosynthesis [Nocardiopsis sp. Huas11]    | GCA_003634495.1 |
| ROV69600.1 | <-ABC_tran<-?  PSE→ Caspase+NACHT+GT4*→                                                                                                                             | Caspase+NACHT+GT4                                                                                                                               | 1187  | D3105_04960  | Actinobacteria      | Streptomyces globisporus    | glycosyltransferase [Streptomyces globisporus]                                      | GCA_003501885.1 |
| RSM57832.1 | cNMP_binding+HTH_Crp_2→?→ GT4*→   <-ACYC+APATPase+TPR                                                                                                               | GT4                                                                                                                                             | 411   | DMH03_26130  | Actinobacteria      | Amycolatopsis sp. WAC 01376 | hypothetical protein DMH03_26130 [Amycolatopsis sp. WAC 01376]                      | GCA_003947415.1 |
| RWH25252.1 | <-Vsr  ?→?→?→   <-?  GT4+Trypsin+PNPase*→                                                                                                                           | GT4+Trypsin+PNPase                                                                                                                              | 961   | EOQ76_19695  | Alphaproteobacteria | Mesorhizobium sp.           | glycosyltransferase [Mesorhizobium sp.]                                             | GCA_004019165.1 |

| acc        | operon                                      | architecture | len  | gen.name             | taxend              | species                       | define                                                                              | gca             |
|------------|---------------------------------------------|--------------|------|----------------------|---------------------|-------------------------------|-------------------------------------------------------------------------------------|-----------------|
| RYG90150.1 | GT4*→                                       | GT4          | 425  | EON59_00395          | Alphaproteobacteria | Alphaproteobacteria bacterium | glycosyltransferase, partial [Alphaproteobacteria bacterium]                        | GCA_004145145.1 |
| RYZ67144.1 | GT4*→                                       | GT4          | 290  | EOP09_11535          | Proteobacteria      | Proteobacteria bacterium      | glycosyltransferase family 1 protein, partial [Proteobacteria bacterium]            | GCA_004174565.1 |
| SCF29539.1 | <-TPR+Caspase  GT4*→?→?→   <-?<-?<-ABC_tran | GT4          | 549  | GA0070618_4941       | Actinobacteria      | Micromonospora echinospora    | Glycosyltransferase involved in cell wall biosynthesis [Micromonospora echinospora] | GCA_900091495.1 |
| SCF46304.1 | <-WXG<-?<-?<-?<-?<-TPR+Caspase  GT4*→       | GT4          | 549  | GA0070563_114162     | Actinobacteria      | Micromonospora carbonacea     | Glycosyltransferase involved in cell wall biosynthesis [Micromonospora carbonacea]  | GCA_900091535.1 |
| SCH34126.1 | GT4*→ TIR→                                  | GT4          | 721  | SAMEA3545339_F00664  | Firmicutes          | uncultured Clostridium sp.    | glycosyltransferase%2C MSMEG_0565 family [uncultured Clostridium sp.]               | GCA_900066565.1 |
| SCL28302.1 | <-TPR+Caspase  GT4*→                        | GT4          | 545  | GA0074694_5072       | Actinobacteria      | Micromonospora inyonensis     | Glycosyltransferase involved in cell wall biosynthesis [Micromonospora inyonensis]  | GCA_900091415.1 |
| SCZ75034.1 | SWACOS+GT4*→?→?→   <-?<-?  MFS→             | SWACOS+GT4   | 1147 | SAMN03159460_05304   | Alphaproteobacteria | Pseudomonas sp. NFPP17        | Glycosyltransferase involved in cell wall biosynthesis [Pseudomonas sp. NFPP17]     | GCA_900102935.1 |
| SDU29240.1 | rve_3→ GT4*→                                | GT4          | 362  | SAMN04488548_A131376 | Actinobacteria      | Gordonia westfalica           | Glycosyltransferase involved in cell wall biosynthesis [Gordonia westfalica]        | GCA_900105725.1 |
| SDX14297.1 | LRR+AP-GTPase+COR→ GT4*→                    | GT4          | 472  | SAMN05216300_B1402   | Alphaproteobacteria | Nitrosomonas oligotropha      | Glycosyltransferase involved in cell wall biosynthesis [Nitrosomonas oligotropha]   | GCA_900106555.1 |

| acc        | operon                                                                                                                     | architecture        | len  | gen.name     | taxend              | species                      | define                                                                                | gca             |
|------------|----------------------------------------------------------------------------------------------------------------------------|---------------------|------|--------------|---------------------|------------------------------|---------------------------------------------------------------------------------------|-----------------|
| SEK03344.1 | <-Sigma  ?→   <-?<-?<-?  GT4+B12-binding*→                                                                                 | GT4+B12-binding     | 1051 | SAMN05518849 | Alphaproteobacteria | Sphingobium sp. AP50         | Glycosyltransferase involved in cell wall biosynthesis [Sphingobium sp. AP50]         | GCA_900109095.1 |
| SIO56974.1 | STAND+TPR+GT4*→                                                                                                            | STAND+TPR+GT4       | 1125 | SAMN05444165 | Beta-proteobacteria | Paraburkholderia phenazinium | Glycosyltransferase involved in cell wall biosynthesis [Paraburkholderia phenazinium] | GCA_900142845.1 |
| SNR45646.1 | HTH_Tnp_1→ TnpB_IS66→?→ NACHT+GT4*→                                                                                        | NACHT+GT4           | 1639 | SAMN06265370 | Alphaproteobacteria | Puniceibacterium sediminis   | Glycosyltransferase involved in cell wall biosynthesis [Puniceibacterium sediminis]   | GCA_900188035.1 |
| TAK32775.1 | GT4*→                                                                                                                      | GT4                 | 646  | EPO40_01735  | Deltaproteobacteria | Myxococcaceae bacterium      | glycosyltransferase [Myxococcaceae bacterium]                                         | GCA_004297725.1 |
| TCO61886.1 | GT4*→   <-TPR                                                                                                              | GT4                 | 392  | EV192_10223  | Actinobacteria      | Actinocrispum wychmicini     | glycosyltransferase involved in cell wall biosynthesis [Actinocrispum wychmicini]     | GCA_004345645.1 |
| TDP89614.1 | GT4*→ TIR+APATPase+TPR→ TPR+Caspase→   <-TPR+Caspase<-CATASP  CATRA-N+CATRA-C+GT4→                                         | GT4                 | 328  | EV186_11214  | Actinobacteria      | Labedaea rhizosphaerae       | glycosyltransferase involved in cell wall biosynthesis [Labedaea rhizosphaerae]       | GCA_004362825.1 |
| TGX49078.1 | GT4+NACHT*→                                                                                                                | GT4+NACHT           | 1219 | E5A73_19725  | Alphaproteobacteria | Sphingomonas gei             | glycosyltransferase [Sphingomonas gei]                                                | GCA_004792685.1 |
| TPG40509.1 | GT4*→                                                                                                                      | GT4                 | 136  | EAH79_11405  | Alphaproteobacteria | Sphingomonas koreensis       | glycosyltransferase [Sphingomonas koreensis]                                          | GCA_006438735.1 |
| TQL90659.1 | <-DUF4242<-?<-?<-PSE  ?→   <-HTH+APATPase+TPR<-TPR+Caspase<-CATASP  CATRA-N+CATRA-C+GT4*→   <-?<-?<-?<-?<-REase+SFI-ATPase | CATRA-N+CATRA-C+GT4 | 735  | FB559_7970   | Actinobacteria      | Actinoallomurus bryophytorum | glycosyltransferase involved in cell wall biosynthesis [Actinoallomurus bryophytorum] | GCA_006716425.1 |

| acc            | operon                                                                                    | architecture                    | len  | gen.name        | taxend              | species                    | define                                                                              | gca             |
|----------------|-------------------------------------------------------------------------------------------|---------------------------------|------|-----------------|---------------------|----------------------------|-------------------------------------------------------------------------------------|-----------------|
| TWH06591.1     | <-TPR+Caspase  GT4*→?→?→   <-?<-?<-ABC_tran                                               | GT4                             | 587  | JD80_04174      | Actinobacteria      | Micromonospora echinospora | glycosyltransferase involved in cell wall biosynthesis [Micromonospora echinospora] | GCA_007829475.1 |
| TWJ29688.1     | <-TPR+Caspase  GT4*→?→?→   <-?<-?<-ABC_tran                                               | GT4                             | 549  | JD81_03199      | Actinobacteria      | Micromonospora sagamiensis | glycosyltransferase involved in cell wall biosynthesis [Micromonospora sagamiensis] | GCA_007829995.1 |
| TXH45940.1     | GT4+nSTAND1+ANK+ANK*→                                                                     | GT4+nSTAND1+ANK+ANK             | 1838 | E6Q92_02710     | Betaproteobacteria  | Burkholderiaceae bacterium | hypothetical protein E6Q92_02710 [Burkholderiaceae bacterium]                       | GCA_008012415.1 |
| VBB15457.1     | GT4+B12-binding+RADICAL-SAM*→                                                             | GT4+B12-binding+RADICAL-SAM     | 1404 | BSTAB16_5653    | Betaproteobacteria  | Burkholderia stabilis      | radical SAM protein [Burkholderia stabilis]                                         | GCA_900240005.1 |
| VBK75063.1     | GT4+B12-binding+RADICAL-SAM*→                                                             | GT4+B12-binding+RADICAL-SAM     | 1404 | SAMEA2064914    | Betaproteobacteria  | Burkholderia pseudomallei  | Glycogen synthase [Burkholderia pseudomallei]                                       | GCA_900592755.1 |
| WP_005483680.1 | TRANSGLUTAMINASE→   <-?<-Zeta_toxin<-?<-?  ?→ GT4*→   <-?<-?<-?<-?<-DUF4913               | GT4                             | 590  | SBD_RS28370     | Actinobacteria      | Streptomyces               | MULTISPECIES: glycosyltransferase [Streptomyces]                                    | GCF_000340335.1 |
| WP_007453552.1 | Multi-TM→?→ STAND→?→ DUF4913→   <-?  ?→ GT4*→?→?→?→ NUDIX→   <-?  ?→ PSE→ ABC_tran→       | GT4                             | 437  | MILUP08_RS00205 | Actinobacteria      | Micromonospora lupini      | glycosyltransferase family 4 protein [Micromonospora lupini]                        | GCF_000297395.2 |
| WP_007734957.1 | STAND+TPR+GT4*→                                                                           | STAND+TPR+GT4                   | 1062 | B5Z53_RS05165   | Betaproteobacteria  | Paraburkholderia hospita   | glycosyltransferase [Paraburkholderia hospita]                                      | GCF_900167965.1 |
| WP_007954182.1 | SQHop_cyclase_C+Prenyltrans+GT4*→?→   <-?  ?→   <-?  ?→ XylR_N+V4R+Sigma54_activat+HTH_8→ | SQHop_cyclase_C+Prenyltrans+GT4 | 779  | JBW_RS18725     | Firmicutes          | Pelosinus fermentans       | glycosyltransferase [Pelosinus fermentans]                                          | GCF_000271665.2 |
| WP_010223837.1 | GT4+STAND*→ TPR→   <-MODE-HTH+PBPII                                                       | GT4+STAND                       | 546  | UW3_RS011698    | Gammaproteobacteria | Pseudomonas donghuensis    | glycosyltransferase [Pseudomonas donghuensis]                                       | GCF_000259195.1 |
| WP_013226178.1 | <-TIR+APATPase  HTH+APATPase+TPR+GT4*→                                                    | HTH+APATPase+TPR+GT4            | 1178 | IW14_RS45345    | Actinobacteria      | Amycolatopsis mediterranei | glycosyltransferase [Amycolatopsis mediterranei]                                    | GCF_000196835.1 |
| WP_017131143.1 | APATPase+GT4*→                                                                            | APATPase+GT4                    | 1299 | BMX68_RS1184    | Gammaproteobacteria | Pseudomonas agarici        | glycosyltransferase [Pseudomonas agarici]                                           | GCF_900109755.1 |

| acc            | operon                                                                                                               | architecture                | len  | gen.name       | taxend                  | species                     | define                                                                  | gca             |
|----------------|----------------------------------------------------------------------------------------------------------------------|-----------------------------|------|----------------|-------------------------|-----------------------------|-------------------------------------------------------------------------|-----------------|
| WP_017594508.1 | GT4*→                                                                                                                | GT4                         | 503  | D459_RS0118563 | Actinobacteria          | Nocardiopsis potens         | glycosyltransferase family 4 protein [Nocardiopsis potens]              | GCF_000341105.1 |
| WP_018327601.1 | <-TniB<-?  ?→   <-?<-?  GT4+B12-binding+RADICAL-SAM*→   <-?<-?  SIG+rve→                                             | GT4+B12-binding+RADICAL-SAM | 1381 | GGD55_RS15170  | Alphaproteobacteria     | Rhizobium giardinii         | B12-binding domain-containing radical SAM protein [Rhizobium giardinii] | GCF_014200295.1 |
| WP_018612920.1 | STAND+TPR+GT4*→                                                                                                      | STAND+TPR+GT4               | 1063 | CFII68_RS03385 | Gamma-<br>teobacteria   | Pseudomonas sp. CFII68      | glycosyltransferase [Pseudomonas sp. CFII68]                            | GCF_000416195.1 |
| WP_019063569.1 | MFS→   <-?<-TPR+Caspase<-CATASP  CATRA-N+CATRA-C+GT4*→<br>HTH+APATPase+TPR→   <-PSE  ?→?→   <-?<-CATASP<-TPR+Caspase | CATRA-N+CATRA-C+GT4         | 720  | SPR02S_RS44725 | Actinobacteria          | Streptomyces prunicolor     | glycosyltransferase family 4 protein [Streptomyces prunicolor]          | GCF_000367365.1 |
| WP_019093712.1 | SWACOS+GT4*→                                                                                                         | SWACOS+GT4                  | 1138 | BK646_RS17250  | Gamma-<br>teobacteria   | Pseudomonas protegens       | glycosyltransferase [Pseudomonas protegens]                             | GCF_003732085.1 |
| WP_019609270.1 | <-AbiEii<-AbiEi_4  ?→ GT4*→                                                                                          | GT4                         | 497  | G011_RS0115488 | Actinobacteria          | Nocardiopsis sp. CNS-639    | glycosyltransferase family 4 protein [Nocardiopsis sp. CNS-639]         | GCF_000381685.1 |
| WP_020647322.1 | <-TIR+APATPase  HTH+APATPase+TPR+GT4*→                                                                               | HTH+APATPase+TPR+GT4        | 1192 | A3CE_RS0148230 | Actinobacteria          | Amycolatopsis balhimycina   | tetratricopeptide repeat protein [Amycolatopsis balhimycina]            | GCF_000384295.1 |
| WP_023267980.1 | GT4+APATPase+TPR+TPR*→                                                                                               | GT4+APATPase+TPR+TPR        | 1323 | SHD_RS15540    | Gamma-<br>teobacteria   | Shewanella decolorationis   | tetratricopeptide repeat protein [Shewanella decolorationis]            | GCF_000485795.1 |
| WP_024631061.1 | <-AAA_21  GT4*→                                                                                                      | GT4                         | 1140 | P364_RS0115745 | Firmicutes              | Paenibacillus sp. MAEPY2    | glycosyltransferase [Paenibacillus sp. MAEPY2]                          | GCF_000499205.1 |
| WP_027196515.1 | Cluster214_2clades→ GT4*→                                                                                            | GT4                         | 760  | BJG93_RS27460  | Betapro-<br>teobacteria | Paraburkholderia spreintiae | glycosyltransferase family 4 protein [Paraburkholderia spreintiae]      | GCF_001865575.1 |
| WP_029881581.1 | <-AAA_21  GT4*→                                                                                                      | GT4                         | 1003 | P363_RS0103940 | Firmicutes              | Paenibacillus sp. MAEPY1    | glycosyltransferase, partial [Paenibacillus sp. MAEPY1]                 | GCF_000499305.1 |

| acc            | operon                                                                                                                                                                                                                                      | architecture                                                                                                                                                                                                                | len   | gen.name       | taxend               | species                          | define                                                                        | gca             |
|----------------|---------------------------------------------------------------------------------------------------------------------------------------------------------------------------------------------------------------------------------------------|-----------------------------------------------------------------------------------------------------------------------------------------------------------------------------------------------------------------------------|-------|----------------|----------------------|----------------------------------|-------------------------------------------------------------------------------|-----------------|
| WP_031021212.1 | ABC_tran->   <-?<-CATASP  CATRA-N+CATRA-C+GT4*-> HTH+APATPase+TPR->   <-HTH  ?->?->?->   <-?<-CATASP                                                                                                                                        | CATRA-N+CATRA-C+GT4                                                                                                                                                                                                         | 705   | IF98_RS0120305 | Actinobacteria       | Streptomyces sp. NRRL S-1314     | glycosyltransferase family 4 protein [Streptomyces sp. NRRL S-1314]           | GCF_000719785.1 |
| WP_031063336.1 | ABC_tran->   <-?<-CATASP  CATRA-N+CATRA-C+GT4*-> HTH+APATPase+TPR->   <-HTH  ?->?->?->   <-?<-CATASP                                                                                                                                        | CATRA-N+CATRA-C+GT4                                                                                                                                                                                                         | 705   | IH17_RS0118610 | Actinobacteria       | Streptomyces sp. NRRL F-5527     | glycosyltransferase family 4 protein [Streptomyces sp. NRRL F-5527]           | GCF_014649055.1 |
| WP_033524509.1 | TRANSGLUTAMINASE->   <-?  ?->   <-?  GT4+NUDIX+ART+PolB-NTase->   <-?<-?<-?  ?-> GT4->   <-?<-?<-?<-?<-DUF4913                                                                                                                              | GT4+NUDIX+ART+PolB-NTase                                                                                                                                                                                                    | 589   | KS09_RS00195   | Actinobacteria       | Streptomyces galbus              | glycosyltransferase [Streptomyces galbus]                                     | GCF_000772895.1 |
| WP_035284396.1 | APATPase+TPR-> GT4*->                                                                                                                                                                                                                       | GT4                                                                                                                                                                                                                         | 502   | UO65_RS36825   | Actinobacteria       | Actinokineospora spheciospongiae | glycosyltransferase [Actinokineospora spheciospongiae]                        | GCF_000564855.1 |
| WP_036515011.1 | WXG+MPTase-> WXG+SecA+HTH+HTH+HTH+HTH+HTH+ST-HisKin+PP2C+MPTase+GT4+TetR-HTH+TetR-HTH+TM+TM+TM+TM+TM+TM+TM+LuxR-HTH+LuxR-HTH+LuxR-HTH+LuxR-HTH+LuxR-HTH+LuxR-HTH+LuxR-HTH+LuxR-HTH+GNTR-HTH+GNTR-HTH+GNTR-HTH+GNTR-HTH+GNTR-HTH+GNTR-HTH*-> | WXG+SecA+HTH+HTH+HTH+HTH+HTH+ST-HisKin+PP2C+MPTase+GT4+TetR-HTH+TetR-HTH+TM+TM+TM+TM+TM+TM+TM+LuxR-HTH+LuxR-HTH+LuxR-HTH+LuxR-HTH+LuxR-HTH+LuxR-HTH+LuxR-HTH+LuxR-HTH+GNTR-HTH+GNTR-HTH+GNTR-HTH+GNTR-HTH+GNTR-HTH+GNTR-HTH | 12585 | NRH01S_RS18840 | Actinobacteria       | Nocardia rhamnosiphila           | GntR family transcriptional regulator [Nocardia rhamnosiphila]                | GCF_001613485.1 |
| WP_036994826.1 | MFS->   <-?  GT4+APATPase+TPR*->   <-MODE-HTH+PBPII                                                                                                                                                                                         | GT4+APATPase+TPR                                                                                                                                                                                                            | 1318  | BV82_RS07620   | Gamma-proteobacteria | Pseudomonas donghuensis          | glycosyltransferase [Pseudomonas donghuensis]                                 | GCF_000696345.1 |
| WP_037254756.1 | cNMP_binding+HTH_Crp_2->?-> GT4*->   <-ACYC+APATPase+TPR                                                                                                                                                                                    | GT4                                                                                                                                                                                                                         | 404   | DMH04_42005    | Actinobacteria       | Kibdelosporangium aridum         | glycosyltransferase [Kibdelosporangium aridum]                                | -               |
| WP_039793765.1 | <-TIR+APATPase  HTH+APATPase+TPR+GT4*->                                                                                                                                                                                                     | HTH+APATPase+TPR+GT4                                                                                                                                                                                                        | 1175  | CFP75_RS23290  | Actinobacteria       | Amycolatopsis alba               | glycosyltransferase [Amycolatopsis alba]                                      | GCF_000384215.1 |
| WP_040866957.1 | WXG+MPTase-> WXG+SecA+GT4+TetR-HTH+MPTase+HTH+HTH+HTH+HTH+HTH+HTH+HTH+HTH+HTH*->                                                                                                                                                            | WXG+SecA+GT4+TetR-HTH+MPTase+HTH+HTH+HTH+HTH+HTH+HTH+HTH+HTH                                                                                                                                                                | 5345  | ON29_RS15345   | Actinobacteria       | Nocardia exalbida                | helix-turn-helix domain-containing protein [Nocardia exalbida]                | GCF_000308575.1 |
| WP_041117337.1 | SWACOS+GT4*->?->   <-?<-?  MFS->                                                                                                                                                                                                            | SWACOS+GT4                                                                                                                                                                                                                  | 1138  | PPC_RS11795    | Gamma-proteobacteria | Pseudomonas protegens            | glycosyltransferase [Pseudomonas protegens]                                   | GCF_000828695.1 |
| WP_042132624.1 | GT4+B12-binding+RADICAL-SAM*->                                                                                                                                                                                                              | GT4+B12-binding+RADICAL-SAM                                                                                                                                                                                                 | 1393  | BJQ15_RS27760  | Gamma-proteobacteria | Pseudomonas                      | MULTISPECIES: B12-binding domain-containing radical SAM protein [Pseudomonas] | GCF_000730605.1 |



| acc            | operon                                                                       | architecture                                                 | len  | gen.name         | taxend              | species                             | define                                                                      | gca             |
|----------------|------------------------------------------------------------------------------|--------------------------------------------------------------|------|------------------|---------------------|-------------------------------------|-----------------------------------------------------------------------------|-----------------|
| WP_043243023.1 | Ribosomal_L20→?→?→?→?→ tRNA→?→ GT4+B12-binding+RADICAL-SAM*→                 | GT4+B12-binding+RADICAL-SAM                                  | 1402 | TX97_RS10150     | Gammaproteobacteria | <i>Pseudomonas alcaligenes</i>      | B12-binding domain-containing radical SAM protein [Pseudomonas alcaligenes] | GCF_000474255.1 |
| WP_043510995.1 | WXG+GT4+GT4+REase*→                                                          | WXG+GT4+GT4+REase                                            | 4153 | ACSP50_RS07520   | Actinobacteria      | unclassified Actinoplanes           | MULTISPECIES: glycosyltransferase [unclassified Actinoplanes]               | GCF_000237145.1 |
| WP_043738635.1 | WXG+MPase→ WXG+SecA+GT4+TetR-HTH+TetR-HTH+MPase+HTH+HTH+HTH+HTH+HTH+HTH*→    | WXG+SecA+GT4+TetR-HTH+TetR-HTH+MPase+HTH+HTH+HTH+HTH+HTH+HTH | 8037 | ON27_RS37615     | Actinobacteria      | <i>Nocardia asiatica</i>            | helix-turn-helix domain-containing protein [Nocardia asiatica]              | GCF_000308415.1 |
| WP_045583922.1 | <-SIG+HTH_23+HTH_32  GT4+TPR*→                                               | GT4+TPR                                                      | 1241 | VY88_RS20945     | Alphaproteobacteria | <i>Azospirillum thiophilum</i>      | tetratricopeptide repeat protein [Azospirillum thiophilum]                  | GCF_001305595.1 |
| WP_050363680.1 | Multi-TM→?→ STAND→?→ DUF4913→?→ GT4*→?→ Zeta_toxin→   <-ABC_tran             | GT4                                                          | 555  | DC095_RS07800    | Actinobacteria      | <i>Streptomyces</i>                 | MULTISPECIES: glycosyltransferase family 4 protein [Streptomyces]           | GCF_000700005.2 |
| WP_050791877.1 | GT4+B12-binding+RADICAL-SAM*→?→   <-PSE<-?  ?→   <-?<-?  Sigma→              | GT4+B12-binding+RADICAL-SAM                                  | 1403 | BUBO0001_RS30205 | Alphaproteobacteria | <i>Burkholderia ubonensis</i>       | B12-binding domain-containing radical SAM protein [Burkholderia ubonensis]  | GCF_000170335.1 |
| WP_051466857.1 | TPR+Caspase→ CATRA-N+CATRA-C+GT4*→ HTH+APATase+TPR→   <-TPR+Caspase  CATASP→ | CATRA-N+CATRA-C+GT4                                          | 812  | BCD49_RS04570    | Actinobacteria      | <i>Frankia</i>                      | MULTISPECIES: glycosyltransferase family 4 protein [Frankia]                | GCF_000235425.2 |
| WP_051653780.1 | MNS+GT4*→   <-?  PSE→ ABC_tran→                                              | MNS+GT4                                                      | 1132 | KCH_RS38295      | Actinobacteria      | <i>Kitasatospora cheerisanensis</i> | glycosyltransferase [Kitasatospora cheerisanensis]                          | GCF_000696185.1 |
| WP_051722648.1 | Multi-TM→?→ STAND→?→ DUF4913→?→ GT4*→?→ Zeta_toxin→                          | GT4                                                          | 561  | IF83_RS0111160   | Actinobacteria      | <i>Streptomyces albus</i>           | glycosyltransferase family 4 protein [Streptomyces albus]                   | GCF_000719865.1 |
| WP_051765847.1 | <-CASPASE+FGS<-?<-?<-?  GT4*→                                                | GT4                                                          | 406  | OQ01_RS21365     | Actinobacteria      | <i>Saccharothrix syringae</i>       | glycosyltransferase [Saccharothrix syringae]                                | GCF_000716755.1 |
| WP_051865326.1 | GT4*→                                                                        | GT4                                                          | 621  | IG99_RS44170     | Actinobacteria      | <i>Streptomyces griseus</i>         | glycosyltransferase [Streptomyces griseus]                                  | GCF_000720255.1 |

| acc            | operon                                                                                                           | architecture                | len  | gen.name       | taxend              | species                    | define                                                                    | gca             |
|----------------|------------------------------------------------------------------------------------------------------------------|-----------------------------|------|----------------|---------------------|----------------------------|---------------------------------------------------------------------------|-----------------|
| WP_052457075.1 | <-TPR+Caspase<-CATASP  CATRA-N+CATRA-C+GT4*→ PSE→ PSE→<br>APATPase+TPR→    <-HTH  ?→    <-?<-CATASP<-TPR+Caspase | CATRA-N+CATRA-C+GT4         | 747  | HY68_RS39570   | Actinobacteria      | Streptomyces sp. AcH 505   | glycosyltransferase [Streptomyces sp. AcH 505]                            | GCF_000818175.1 |
| WP_052479793.1 | TIR+APATPase+GT4*→                                                                                               | TIR+APATPase+GT4            | 810  | APS67_RS01150  | Actinobacteria      | unclassified Streptomyces  | MULTISPECIES: TIR domain-containing protein [unclassified Streptomyces]   | GCF_000829695.1 |
| WP_053258773.1 | GT4+B12-binding+RADICAL-SAM*→                                                                                    | GT4+B12-binding+RADICAL-SAM | 1401 | ALQ35_RS05776  | Gammaproteobacteria | Pseudomonas fluorescens    | cobalamin B12-binding domain-containing protein [Pseudomonas fluorescens] | GCF_002091595.1 |
| WP_053682326.1 | MFS→?→    <-?<-?  ?→    <-?  MPTase+GT4*→?→?→    <-?<-?<-?<-ABC_tran                                             | MPTase+GT4                  | 764  | ADK55_RS26503  | Actinobacteria      | Streptomyces sp. WM4235    | DUF4157 domain-containing protein [Streptomyces sp. WM4235]               | GCF_001279725.1 |
| WP_054048489.1 | TPR+Caspase→ TIR+APATPase+TPR→    <-APATPase+TPR  GT4*→    <-HTH+APATPase+TPR                                    | GT4                         | 456  | BN1701_RS12505 | Actinobacteria      | Alloactinosynnema sp. L-07 | glycosyltransferase family 4 protein [Alloactinosynnema sp. L-07]         | GCF_900070365.1 |
| WP_055337289.1 | STAND+TPR+GT4*→?→ SIG+HTH_23+HTH_32→    <-?<-?  DJ-1_PfpI→                                                       | STAND+TPR+GT4               | 1061 | HXP36_RS10750  | Betaproteobacteria  | Ralstonia solanacearum     | glycosyltransferase [Ralstonia solanacearum]                              | GCF_001373335.1 |
| WP_055417577.1 | MNS+GT4*→                                                                                                        | MNS+GT4                     | 1164 | B1H29_RS20255  | Actinobacteria      | Streptomyces pactum        | glycosyltransferase [Streptomyces pactum]                                 | GCF_002005225.1 |
| WP_055618904.1 | NACHT+MNS→ MNS+GT4*→                                                                                             | MNS+GT4                     | 754  | JHAN_RS00420   | Actinobacteria      | Streptomyces sp. JHA19     | glycosyltransferase [Streptomyces sp. JHA19]                              | GCF_001417695.1 |
| WP_055624376.1 | MNS+GT4*→                                                                                                        | MNS+GT4                     | 1149 | JHAN_RS28925   | Actinobacteria      | Streptomyces sp. JHA19     | AAA family ATPase [Streptomyces sp. JHA19]                                | GCF_001417695.1 |
| WP_057006131.1 | GT4*→                                                                                                            | GT4                         | 773  | TU80_RS30870   | Gammaproteobacteria | Pseudomonas                | MULTISPECIES: glycosyltransferase [Pseudomonas]                           | GCF_900104875.1 |
| WP_058422527.1 | GT4+B12-binding+RADICAL-SAM*→                                                                                    | GT4+B12-binding+RADICAL-SAM | 1407 | AO063_RS26420  | Gammaproteobacteria | Pseudomonas fluorescens    | radical SAM protein [Pseudomonas fluorescens]                             | GCF_001466835.1 |

| acc            | operon                                                                                                                                                      | architecture                                                                                                                   | len  | gen.name      | taxend               | species                    | define                                                       | gca             |
|----------------|-------------------------------------------------------------------------------------------------------------------------------------------------------------|--------------------------------------------------------------------------------------------------------------------------------|------|---------------|----------------------|----------------------------|--------------------------------------------------------------|-----------------|
| WP_058721560.1 | STAND+TPR+GT4*→   <-?<-?<-?<-ABC_tran                                                                                                                       | STAND+TPR+GT4                                                                                                                  | 1063 | AT984_RS19735 | Betaproteobacteria   | Paucibacter sp. KCTC 42545 | glycosyltransferase [Paucibacter sp. KCTC 42545]             | GCF_001477625.1 |
| WP_060944940.1 | MNS+GT4*→                                                                                                                                                   | MNS+GT4                                                                                                                        | 1149 | AXW62_RS14785 | Actinobacteria       | Streptomyces hygroscopicus | glycosyltransferase [Streptomyces hygroscopicus]             | GCF_001553455.1 |
| WP_062579281.1 | GT4*→   <-?  ?→?→?→?→ SIG+SnoaL→                                                                                                                            | GT4                                                                                                                            | 372  | ASG42_RS32705 | Alphaproteobacteria  | Rhizobium sp. Leaf391      | glycosyltransferase family 1 protein [Rhizobium sp. Leaf391] | GCF_001424505.1 |
| WP_062720264.1 | <-TPR+Caspase  GT4*→                                                                                                                                        | GT4                                                                                                                            | 610  | AQJ67_RS19460 | Actinobacteria       | Streptomyces caeruleatus   | glycosyltransferase [Streptomyces caeruleatus]               | GCF_001514235.1 |
| WP_062723774.1 | MNS+GT4*→                                                                                                                                                   | MNS+GT4                                                                                                                        | 1219 | AQJ67_RS36455 | Actinobacteria       | Streptomyces caeruleatus   | glycosyltransferase [Streptomyces caeruleatus]               | GCF_001514235.1 |
| WP_062964870.1 | WXG+MPTase→ WXG+SecA+ST-Hiskin+LuxR-HTH+LuxR-HTH+LuxR-HTH+LuxR-HTH+ST-Hiskin+GT4+TetR-HTH+TetR-HTH+Tox-ART-RSE+LuxR-HTH+PP2C+MPTase+MPTase*→?→ ABhydrolase→ | WXG+SecA+ST-Hiskin+LuxR-HTH+LuxR-HTH+LuxR-HTH+LuxR-HTH+ST-Hiskin+GT4+TetR-HTH+TetR-HTH+Tox-ART-RSE+LuxR-HTH+PP2C+MPTase+MPTase | 9117 | NA3_RS18555   | Actinobacteria       | Nocardia africana          | glycosyltransferase [Nocardia africana]                      | GCF_001612635.1 |
| WP_063038911.1 | WXG+TM+TM+TM→?→?→?→?→?→ WXG+ZetaToxin+GT4*→                                                                                                                 | WXG+ZetaToxin+GT4                                                                                                              | 1614 | NP3_RS06870   | Actinobacteria       | Nocardia pseudovaccinii    | zeta toxin family protein [Nocardia pseudovaccinii]          | GCF_001613225.1 |
| WP_063127006.1 | Zeta_toxin→   <-?  MPTase→?→ WXG+TM+TM+TM+TM+GT4*→                                                                                                          | WXG+TM+TM+TM+TM+GT4                                                                                                            | 1018 | NF4_RS09930   | Actinobacteria       | Nocardia fusca             | glycosyltransferase [Nocardia fusca]                         | -               |
| WP_063882776.1 | GT4+APATPase+TPR+TPR*→                                                                                                                                      | GT4+APATPase+TPR+TPR                                                                                                           | 1322 | A1L58_RS04155 | Gamma-proteobacteria | Shewanella baltica         | tetratricopeptide repeat protein [Shewanella baltica]        | GCF_001620325.1 |
| WP_063889953.1 | GT4+B12-binding+RADICAL-SAM*→   <-?  ?→   <-?  ?→   <-?  ?→   <-TRPR-HTH+PBPI                                                                               | GT4+B12-binding+RADICAL-SAM                                                                                                    | 1415 | WI77_RS33765  | Betaproteobacteria   | Burkholderia ubonensis     | radical SAM protein [Burkholderia ubonensis]                 | GCF_001525885.1 |
| WP_064054195.1 | <-HTH_3  ?→?→   <-?<-Cluster466_2clades  STAND+GT4*→   <-?<-Sigma                                                                                           | STAND+GT4                                                                                                                      | 1084 | ALQ29_RS11960 | Gamma-proteobacteria | Pseudomonas marginalis     | glycosyltransferase [Pseudomonas marginalis]                 | GCF_001645105.1 |
| WP_064273456.1 | GT4*→                                                                                                                                                       | GT4                                                                                                                            | 135  | A7B19_RS17315 | Actinobacteria       | Streptomyces sp. RTd22     | hypothetical protein [Streptomyces sp. RTd22]                | GCF_001650215.1 |

| acc            | operon                                                                                           | architecture                | len  | gen.name       | taxend               | species                          | define                                                                                                     | gca             |
|----------------|--------------------------------------------------------------------------------------------------|-----------------------------|------|----------------|----------------------|----------------------------------|------------------------------------------------------------------------------------------------------------|-----------------|
| WP_065910241.1 | GT4+B12-binding+RADICAL-SAM*→                                                                    | GT4+B12-binding+RADICAL-SAM | 1393 | C9382_RS17200  | Gamma-proteobacteria | unclassified<br>Pseudomonas      | MULTISPECIES:<br>cobalamin<br>B12-binding<br>domain-containing<br>protein<br>[unclassified<br>Pseudomonas] | GCF_001702265.1 |
| WP_067257069.1 | GT4*→                                                                                            | GT4                         | 398  | AQJ58_RS33820  | Actinobacteria       | Streptomyces sp.<br>DSM 15324    | glycosyltransferase family 4<br>protein<br>[Streptomyces sp.<br>DSM 15324]                                 | GCF_001514285.1 |
| WP_067481412.1 | HTH→?→    <-?  NACHT+MNS→ MNS+GT4*→                                                              | MNS+GT4                     | 764  | AH6_RS18370    | Actinobacteria       | Actinomadura<br>hibisca          | glycosyltransferase<br>[Actinomadura<br>hibisca]                                                           | GCF_001552635.1 |
| WP_067904030.1 | SWACOS+GT4*→                                                                                     | SWACOS+GT4                  | 1149 | ACH01S_RS37935 | Actinobacteria       | Actinomadura<br>chibensis        | glycosyltransferase<br>[Actinomadura<br>chibensis]                                                         | GCF_001552135.1 |
| WP_068874779.1 | HTH_3→?→    <-?<-?  ?→ MPTase→?→ NACHT+GT4*→    <-?  ?→    <-?<-?<-PSE<-?  ?→ SIG+Lipase_GDSL_2→ | NACHT+GT4                   | 1671 | AX747_RS22605  | Alphaproteobacteria  | unclassified<br>Phenylobacterium | MULTISPECIES:<br>glycosyltransferase [unclassified<br>Phenylobacterium]                                    | GCF_001557235.1 |
| WP_069042340.1 | NACHT+GT4*→                                                                                      | NACHT+GT4                   | 1642 | BSY240_RS11090 | Alphaproteobacteria  | Agrobacterium sp.<br>RAC06       | glycosyltransferase<br>[Agrobacterium<br>sp. RAC06]                                                        | GCF_001713475.1 |
| WP_070086299.1 | GT4+B12-binding+RADICAL-SAM*→                                                                    | GT4+B12-binding+RADICAL-SAM | 1393 | BJQ21_RS10430  | Gamma-proteobacteria | unclassified<br>Pseudomonas      | MULTISPECIES:<br>radical SAM<br>protein<br>[unclassified<br>Pseudomonas]                                   | GCF_001753875.1 |
| WP_071611953.1 | GT4*→?→?→?→ PadR→?→    <-?<-ABC_tran                                                             | GT4                         | 724  | F7R00_RS19755  | Firmicutes           | Clostridium<br>estertheticum     | glycosyltransferase family 4<br>protein<br>[Clostridium<br>estertheticum]                                  | GCF_001877035.1 |
| WP_071621050.1 | <-AbiEii<-AbiEi_4  ?→ GT4*→                                                                      | GT4                         | 497  | CGQ36_RS01685  | Actinobacteria       | Nocardiopsis<br>dassonvillei     | glycosyltransferase family 4<br>protein<br>[Nocardiopsis<br>dassonvillei]                                  | GCF_001877055.1 |
| WP_072444656.1 | SWACOS+GT4*→?→    <-?<-?  MFS→                                                                   | SWACOS+GT4                  | 1138 | BM382_RS27510  | Gamma-proteobacteria | unclassified<br>Pseudomonas      | MULTISPECIES:<br>glycosyltransferase [unclassified<br>Pseudomonas]                                         | GCF_900102935.1 |
| WP_073746098.1 | CASPASE→ tRNA→    <-?  MNS+GT4*→                                                                 | MNS+GT4                     | 1169 | AMK28_RS33605  | Actinobacteria       | Streptomyces sp.<br>CB02115      | glycosyltransferase<br>[Streptomyces sp.<br>CB02115]                                                       | GCF_001905645.1 |



| acc            | operon                                                            | architecture                         | len  | gen.name           | taxend                   | species                           | defline                                                                           | gca             |
|----------------|-------------------------------------------------------------------|--------------------------------------|------|--------------------|--------------------------|-----------------------------------|-----------------------------------------------------------------------------------|-----------------|
| WP_080422913.1 | GT4+APATPase+TPR+TPR*→                                            | GT4+APATPase+TPR+TPR                 | 1339 | WL11_RS09715       | Betapro-<br>teobacteria  | Burkholderia<br>ubonensis         | tetratricopeptide<br>repeat protein<br>[Burkholderia<br>ubonensis]                | GCF_001530465.1 |
| WP_080436327.1 | NACHT+TPR+GT4*→                                                   | NACHT+TPR+GT4                        | 1226 | WM18_RS12015       | Betapro-<br>teobacteria  | Burkholderia<br>ubonensis         | glycosyltrans-<br>ferase<br>[Burkholderia<br>ubonensis]                           | GCF_001533745.1 |
| WP_080492181.1 | AA_permease→?→ GT4+APATPase+TPR+TPR*→                             | GT4+APATPase+TPR+TPR                 | 1293 | BGV55_RS22015      | Betapro-<br>teobacteria  | Burkholderia<br>ubonensis         | tetratricopeptide<br>repeat protein<br>[Burkholderia<br>ubonensis]                | GCF_001882545.1 |
| WP_082136219.1 | GT4+APATPase+TPR+TPR*→                                            | GT4+APATPase+TPR+TPR                 | 1282 | TR67_RS23240       | Gammapro-<br>teobacteria | Pseudomonas<br>deceptionensis     | glycosyltrans-<br>ferase<br>[Pseudomonas<br>deceptionensis]                       | GCF_900106095.1 |
| WP_082297595.1 | GT4*→                                                             | GT4                                  | 599  | AKH00_RS12250      | Actinobacte-<br>ria      | Microbacterium<br>sp. GCS4        | glycosyltrans-<br>ferase family 4<br>protein<br>[Microbacterium<br>sp. GCS4]      | GCF_001262495.1 |
| WP_082404817.1 | <-ABC_tran  ?→?→   <-?<-TIR+NACHT  HTH+APATPase+TPR+GT4*→         | HTH+APATPase+TPR+GT4                 | 1223 | ADK67_RS45530      | Actinobacte-<br>ria      | Saccharothrix sp.<br>NRRL B-16348 | glycosyltrans-<br>ferase<br>[Saccharothrix sp.<br>NRRL B-16348]                   | GCF_001280085.1 |
| WP_082466077.1 | GT4*→   <-TRPR-HTH+PBPI<-?<-?<-?<-?  ABC_tran→                    | GT4                                  | 618  | ASE64_RS17155      | Actinobacte-<br>ria      | Agreia sp.<br>Leaf210             | glycosyltrans-<br>ferase [Agreia sp.<br>Leaf210]                                  | GCF_001421485.1 |
| WP_083469142.1 | GT4+NUDIX*→                                                       | GT4+NUDIX                            | 750  | VQ02_RS35520       | Alphapro-<br>teobacteria | Methylobacterium<br>variabile     | glycosyltrans-<br>ferase family 4<br>protein [Methy-<br>lobacterium<br>variabile] | GCF_001043975.1 |
| WP_083731258.1 | Multi-TM→?→ STAND→?→ DUF4913→?→   <-?  GT4+NUDIX+ART+PolB-NTase*→ | GT4+NUDIX+ART+PolB-NTase             | 1854 | BL254_RS25375      | Actinobacte-<br>ria      | Frankia sp.<br>BMG5.30            | glycosyltrans-<br>ferase [Frankia sp.<br>BMG5.30]                                 | GCF_001983005.1 |
| WP_083895344.1 | WXG→?→?→ WXG→?→?→?→ WXG+Caspase+VWA+Papain+ZetaToxin+GT4*→        | WXG+Caspase+VWA+Papain+ZetaToxin+GT4 | 3035 | ON40_RS01890       | Actinobacte-<br>ria      | Nocardia<br>jiangxiensis          | zeta toxin family<br>protein [Nocardia<br>jiangxiensis]                           | GCF_000308615.1 |
| WP_085710134.1 | <-LexA  GT4+APATPase+TPR+TPR*→   <-?<-?<-ABC_tran                 | GT4+APATPase+TPR+TPR                 | 1389 | CAG24_RS08890      | Gammapro-<br>teobacteria | unclassified<br>Pseudomonas       | MULTISPECIES:<br>glycosyltrans-<br>ferase [unclassified<br>Pseudomonas]           | GCF_002112315.1 |
| WP_086055635.1 | DUF4913→?→   <-?  GT4+NUDIX+ART+PolB-NTase*→                      | GT4+NUDIX+ART+PolB-NTase             | 1854 | FrCorBMG51_RS27570 | Actinobacte-<br>ria      | Frankia coriariae                 | glycosyltrans-<br>ferase [Frankia<br>coriariae]                                   | -               |
| WP_086802688.1 | GT4+NUDIX+ART+PolB-NTase*→                                        | GT4+NUDIX+ART+PolB-NTase             | 1883 | CCN48_RS29200      | Actinobacte-<br>ria      | Streptomyces<br>scabiei           | glycosyltrans-<br>ferase family 4<br>protein<br>[Streptomyces<br>scabiei]         | GCF_002155725.1 |

| acc            | operon                                                                               | architecture                | len  | gen.name          | taxend              | species                     | define                                                                    | gca             |
|----------------|--------------------------------------------------------------------------------------|-----------------------------|------|-------------------|---------------------|-----------------------------|---------------------------------------------------------------------------|-----------------|
| WP_087651531.1 | GT4+Trypsin+PNPase*→                                                                 | GT4+Trypsin+PNPase          | 929  | S1001342_RS03745  | Alphaproteobacteria | Acetobacter pasteurianus    | glycosyltransferase [Acetobacter pasteurianus]                            | GCF_002173735.1 |
| WP_088088251.1 | GT4*→                                                                                | GT4                         | 624  | CCK98_RS20350     | Firmicutes          | Bacillus sp. OV166          | glycosyltransferase family 4 protein [Bacillus sp. OV166]                 | GCF_900177675.1 |
| WP_088287445.1 | GT4+APATPase+TPR+TPR*→                                                               | GT4+APATPase+TPR+TPR        | 1066 | EOIN-JALH_RS30615 | Betaproteobacteria  | Ideonella sp. A 288         | tetratricopeptide repeat protein [Ideonella sp. A 288]                    | GCF_002198735.1 |
| WP_090142138.1 | GT4*→                                                                                | GT4                         | 516  | AMM33_RS15110     | Betaproteobacteria  | Limnohabitans sp. DM1       | glycosyltransferase family 4 protein [Limnohabitans sp. DM1]              | GCF_001269385.1 |
| WP_091283948.1 | TPR+Caspase→ TPR+Caspase→   <-CATASP  CATRA-N+CATRA-C+GT4*→   <-?  HTH+APATPase+TPR→ | CATRA-N+CATRA-C+GT4         | 839  | AWX74_RS30820     | Actinobacteria      | Frankia irregularis         | glycosyltransferase family 4 protein [Frankia irregularis]                | GCF_001536285.1 |
| WP_091296338.1 | cNMP_binding+HTH_Crp_2→?→ GT4*→   <-ACYC+APATPase+TPR                                | GT4                         | 406  | BLV57_RS34110     | Actinobacteria      | Amycolatopsis xylanica      | glycosyltransferase family 4 protein [Amycolatopsis xylanica]             | GCF_900107045.1 |
| WP_091582937.1 | STAND→?→ DUF4913→   <-?<-?  ?→ GT4*→?→?→?→ NUDIX→   <-?<-ABC_tran                    | GT4                         | 438  | GA0070622_RS30350 | Actinobacteria      | Micromonospora sediminicola | glycosyltransferase family 4 protein [Micromonospora sediminicola]        | GCF_900089585.1 |
| WP_092202072.1 | ABC_tran→?→?→?→?→?→   <-?  STAND+TPR+GT4*→                                           | STAND+TPR+GT4               | 1063 | BLU85_RS18570     | Gammaproteobacteria | unclassified Pseudomonas    | MULTISPECIES: glycosyltransferase [unclassified Pseudomonas]              | GCF_900103555.1 |
| WP_092992899.1 | GT4+TPR+TPR*→                                                                        | GT4+TPR+TPR                 | 1441 | BLP65_RS04115     | Gammaproteobacteria | Thiohalomonas denitrificans | tetratricopeptide repeat protein [Thiohalomonas denitrificans]            | GCF_900102855.1 |
| WP_094198012.1 | GST_N_2+GST_C→?→   <-?<-?<-?  trRNA→ Cluster214_2clades→ GT4*→   <-?<-?<-?<-DctM     | GT4                         | 756  | AFA_RS17265       | Betaproteobacteria  | Alcaligenes faecalis        | glycosyltransferase family 4 protein [Alcaligenes faecalis]               | GCF_002242175.1 |
| WP_096772335.1 | rve+rve_3→   <-?  ?→   <-?  PSE→   <-?<-?  GT4+B12-binding+RADICAL-SAM*→             | GT4+B12-binding+RADICAL-SAM | 1313 | GGE61_RS22535     | Alphaproteobacteria | Rhizobium                   | MULTISPECIES: cobalamin B12-binding domain-containing protein [Rhizobium] | GCF_013087515.1 |

| acc            | operon                                                                 | architecture     | len  | gen.name       | taxend                | species                        | define                                                                           | gca             |
|----------------|------------------------------------------------------------------------|------------------|------|----------------|-----------------------|--------------------------------|----------------------------------------------------------------------------------|-----------------|
| WP_096876300.1 | GT4+APATPase*→                                                         | GT4+APATPase     | 888  | MKLM6_RS16005  | Gamma-<br>teobacteria | Methylomonas<br>koyamae        | glycosyltrans-<br>ferase<br>[Methylomonas<br>koyamae]                            | GCF_002441955.1 |
| WP_097325277.1 | WXG→?→ GT4*→                                                           | GT4              | 626  | CRP55_RS32890  | Actinobacte-<br>ria   | Actinoplanes<br>atrantiaicus   | glycosyltrans-<br>ferase family 4<br>protein<br>[Actinoplanes<br>atrantiaicus]   | GCF_900215205.1 |
| WP_097329102.1 | wHTH+TPR+APATPase→?→?→   <-?  GT4*→   <-?  ?→?→?→?→   <-?<-WXG+Caspase | GT4              | 510  | CRP55_RS49635  | Actinobacte-<br>ria   | Actinoplanes<br>atrantiaicus   | glycosyltrans-<br>ferase family 4<br>protein<br>[Actinoplanes<br>atrantiaicus]   | GCF_900215205.1 |
| WP_097811834.1 | GT4*→                                                                  | GT4              | 600  | CN930_RS12860  | Firmicutes            | Bacillus cereus                | [Actinoplanes<br>atrantiaicus]<br>glycosyltrans-<br>ferase [Bacillus<br>cereus]  | GCF_002574885.1 |
| WP_097931751.1 | <-DNA_methylase  ?→?→?→?→?→   <-?  MNS+GT4*→                           | MNS+GT4          | 1170 | CR483_RS02605  | Actinobacte-<br>ria   | unclassified<br>Streptomyces   | MULTISPECIES:<br>glycosyltrans-<br>ferase [unclassified<br>Streptomyces]         | GCF_002551215.1 |
| WP_098141735.1 | GT4*→?→?→?→?→?→ NLPC→                                                  | GT4              | 541  | CN671_RS19510  | Firmicutes            | Bacillus<br>toyonensis         | glycosyltrans-<br>ferase [Bacillus<br>toyonensis]                                | GCF_012395365.1 |
| WP_098743858.1 | STAND→?→ DUF4913→   <-?<-?  ?→ GT4*→?→?→?→ NUDIX→   <-?<-ABC_tran      | GT4              | 438  | COO58_RS03965  | Actinobacte-<br>ria   | Micromonospora<br>sp. WMMA1996 | glycosyltrans-<br>ferase family 4<br>protein<br>[Micromonospora<br>sp. WMMA1996] | GCF_002573675.1 |
| WP_099013704.1 | MNS+GT4*→                                                              | MNS+GT4          | 1149 | SMALA_RS12770  | Actinobacte-<br>ria   | Streptomyces<br>malaysiensis   | AAA family<br>ATPase<br>[Streptomyces<br>malaysiensis]                           | GCF_002591335.1 |
| WP_100783315.1 | MFS→   <-?  GT4+APATPase+TPR*→   <-MODE-HTH+PBPII                      | GT4+APATPase+TPR | 1318 | COO64_RS24546  | Gamma-<br>teobacteria | Pseudomonas<br>donghuensis     | glycosyltrans-<br>ferase<br>[Pseudomonas<br>donghuensis]                         | GCF_002811135.1 |
| WP_101210325.1 | GT4*→ TPR→                                                             | GT4              | 541  | AT251_RS15815  | Gamma-<br>teobacteria | Enterovibrio<br>nigricans      | hypothetical<br>protein<br>[Enterovibrio<br>nigricans]                           | -               |
| WP_101386266.1 | -                                                                      | -                | 1324 | -              | Actinobacte-<br>ria   | Streptomyces sp.<br>TLI_146    | caspace family<br>protein<br>[Streptomyces sp.<br>TLI_146]                       | -               |
| WP_101718466.1 | <-ABC_tran<-?<-?<-?<-PSE<-?  ?→?→ GT4*→                                | GT4              | 612  | SGCZBJ_RS13250 | Gamma-<br>teobacteria | Caulobacter zeae               | glycosyltrans-<br>ferase<br>[Caulobacter zeae]                                   | GCF_002858925.1 |



| acc            | operon                                                      | architecture                  | len  | gen.name      | taxend               | species                  | define                                                          | gca             |
|----------------|-------------------------------------------------------------|-------------------------------|------|---------------|----------------------|--------------------------|-----------------------------------------------------------------|-----------------|
| WP_102909088.1 | NUDIX→?→ GT4*→                                              | GT4                           | 433  | C1J00_RS12325 | Actinobacteria       | Streptomyces sp. 13K301  | glycosyltransferase family 4 protein [Streptomyces sp. 13K301]  | GCF_002891435.1 |
| WP_103291295.1 | SWACOS+GT4*→?→    <-?<-?  MFS→                              | SWACOS+GT4                    | 1138 | C1633_RS27595 | Gamma-proteobacteria | Pseudomonas protegens    | glycosyltransferase [Pseudomonas protegens]                     | GCF_002899905.1 |
| WP_103660162.1 | NACHT+GT4*→                                                 | NACHT+GT4                     | 1646 | CPJ18_RS23160 | Alphaproteobacteria  | Agrobacterium rosae      | glycosyltransferase [Agrobacterium rosae]                       | GCF_002915175.1 |
| WP_104365810.1 | GT4*→                                                       | GT4                           | 428  | C5E51_RS10910 | Actinobacteria       | Nocardia nova            | glycosyltransferase family 4 protein [Nocardia nova]            | GCF_002933545.1 |
| WP_105007055.1 | GT4*→?→    <-PSE  ?→?→ Calcineurin→                         | GT4                           | 606  | CUJ84_RS16890 | Alphaproteobacteria  | Rhizobium leguminosarum  | glycosyltransferase family 4 protein [Rhizobium leguminosarum]  | GCF_002953715.1 |
| WP_106119969.1 | Cluster214_2clades→ GT4*→                                   | GT4                           | 736  | C7A11_RS23785 | Gamma-proteobacteria | Pseudomonas simiae       | glycosyltransferase family 4 protein [Pseudomonas simiae]       | GCF_003001535.1 |
| WP_107027343.1 | NACHT+GT4*→    <-?<-?  PSE→ TIR→                            | NACHT+GT4                     | 1646 | C6558_RS13435 | Alphaproteobacteria  | Ensifer sp. NM-2         | glycosyltransferase [Ensifer sp. NM-2]                          | GCF_003024455.1 |
| WP_107161461.1 | GT4+NACHT+BetaPropeller*→                                   | GT4+NACHT+BetaPropeller       | 1536 | C8054_RS26470 | Actinobacteria       | Micromonospora sp. RP3T  | glycosyltransferase [Micromonospora sp. RP3T]                   | GCF_003027925.1 |
| WP_107259933.1 | nSTAND3→?→?→ GT4*→    <-?<-?  ?→    <-?  ?→ PSE→    <-NUDIX | GT4                           | 596  | C6W10_RS21380 | Actinobacteria       | Plantactinospora sp. BB1 | glycosyltransferase family 4 protein [Plantactinospora sp. BB1] | GCF_003030385.1 |
| WP_107266333.1 | nSTAND3→?→?→ GT4*→                                          | GT4                           | 596  | C6361_RS00275 | Actinobacteria       | Plantactinospora sp. BC1 | glycosyltransferase [Plantactinospora sp. BC1]                  | GCF_003030345.1 |
| WP_107402046.1 | Multi-TM→?→ STAND→?→ DUF4913→?→ GT4*→ Zeta_toxin→           | GT4                           | 374  | AN216_RS27375 | Actinobacteria       | Streptomyces oceani      | glycosyltransferase [Streptomyces oceani]                       | GCF_001751245.1 |
| WP_107867044.1 | LRR+LRR+LRR+AP-GTPase+COR+GT4*→                             | LRR+LRR+LRR+AP-GTPase+COR+GT4 | 1510 | C8N29_RS15840 | Firmicutes           | Agitococcus lubricus     | leucine-rich repeat protein [Agitococcus lubricus]              | GCF_003051055.1 |

| acc            | operon                                                           | architecture                | len  | gen.name      | taxend              | species                     | define                                                             | gca             |
|----------------|------------------------------------------------------------------|-----------------------------|------|---------------|---------------------|-----------------------------|--------------------------------------------------------------------|-----------------|
| WP_108006164.1 | <-HTH+APATPase+TPR  GT4*→?→    <-?<-?<-?  TPR→                   | GT4                         | 421  | C7821_RS00535 | Actinobacteria      | Streptomyces sp. VMFN-G11Ma | glycosyltransferase family 4 protein [Streptomyces sp. VMFN-G11Ma] | GCF_003046555.1 |
| WP_108666907.1 | NLPC→?→?→?→    <-?  GT4*→                                        | GT4                         | 564  | CUC05_RS14855 | Actinobacteria      | Euzebya rosea               | glycosyltransferase family 4 protein [Euzebya rosea]               | GCF_003073135.1 |
| WP_109448176.1 | MPTase+GT4*→                                                     | MPTase+GT4                  | 753  | CK485_RS28700 | Actinobacteria      | Streptomyces sp. ICBB 8177  | DUF4157 domain-containing protein [Streptomyces sp. ICBB 8177]     | GCF_003144095.1 |
| WP_112357576.1 | GT4*→                                                            | GT4                         | 628  | DTY03_RS10803 | Alphaproteobacteria | Rhizobiales bacterium       | glycosyltransferase family 4 protein [Rhizobiales bacterium]       | -               |
| WP_112733881.1 | GT4+APATPase+TPR*→                                               | GT4+APATPase+TPR            | 1361 | ONO86_RS28911 | Actinobacteria      | Micromonospora noduli       | glycosyltransferase [Micromonospora noduli]                        | GCF_003264435.1 |
| WP_113016426.1 | HTH+MPTase→    <-?<-?<-?  GT4+B12-binding+RADICAL-SAM*→          | GT4+B12-binding+RADICAL-SAM | 1381 | DUD68_RS27091 | Alphaproteobacteria | Rhizobiales bacterium       | radical SAM protein [Rhizobiales bacterium]                        | -               |
| WP_113272579.1 | HTH+MPTase→?→ Helicase_C→ SIG+DUF1998→    <-?<-?  ?→ NACHT+GT4*→ | NACHT+GT4                   | 1640 | DUJ98_RS17735 | Alphaproteobacteria | Rhizobiales bacterium       | glycosyltransferase [Rhizobiales bacterium]                        | -               |
| WP_114055463.1 | TIR+APATPase+GT4*→                                               | TIR+APATPase+GT4            | 775  | C0216_RS13195 | Actinobacteria      | Streptomyces globosus       | TIR domain-containing protein [Streptomyces globosus]              | GCF_003325375.1 |
| WP_114396907.1 | GT4*→                                                            | GT4                         | 529  | DEF24_RS15180 | Actinobacteria      | Maritenerispora sediminis   | glycosyltransferase family 4 protein [Maritenerispora sediminis]   | GCF_003336445.1 |
| WP_116211561.1 | NACHT→ GT4*→                                                     | GT4                         | 406  | DXZ73_RS15355 | Actinobacteria      | Streptomyces olivoreticuli  | glycosyltransferase family 4 protein [Streptomyces olivoreticuli]  | GCF_003391135.1 |
| WP_116568912.1 | GT4*→?→    <-?<-?  ?→    <-?<-MODE-HTH+PBPII                     | GT4                         | 612  | DDF65_RS17385 | Alphaproteobacteria | Caulobacter radialis        | glycosyltransferase [Caulobacter radialis]                         | GCF_003094595.1 |

| acc            | operon                                                                                       | architecture                  | len  | gen.name       | taxend               | species                           | define                                                                   | gca             |
|----------------|----------------------------------------------------------------------------------------------|-------------------------------|------|----------------|----------------------|-----------------------------------|--------------------------------------------------------------------------|-----------------|
| WP_120733613.1 | GT4+B12-binding+RADICAL-SAM*→                                                                | GT4+B12-binding+RADICAL-SAM   | 1400 | D7M10_RS181330 | Gamma-proteobacteria | <i>Pseudomonas fluorescens</i>    | radical SAM protein [Pseudomonas fluorescens]                            | GCF_003626995.1 |
| WP_120967974.1 | GT4+APATPase+TPR+TPR*→                                                                       | GT4+APATPase+TPR+TPR          | 1425 | EAO39_RS12970  | Beta-proteobacteria  | <i>Comamonas sp. lk</i>           | tetratricopeptide repeat protein [Comamonas sp. lk]                      | GCF_900564145.1 |
| WP_121165351.1 | Sigma→?→?→?→?→?→ LRR+LRR+LRR+AP-GTPase+COR+GT4*→                                             | LRR+LRR+LRR+AP-GTPase+COR+GT4 | 1488 | B0H84_RS06470  | Beta-proteobacteria  | <i>Nitrosomonas sp. Nm120</i>     | leucine-rich repeat domain-containing protein [Nitrosomonas sp. Nm120]   | GCF_003664085.1 |
| WP_121799508.1 | Multi-TM→?→ STAND→?→ DUF4913→?→ GT4*→                                                        | GT4                           | 488  | CTZ27_RS14745  | Actinobacteria       | <i>Streptomyces griseocarneus</i> | glycosyltransferase family 4 protein [Streptomyces griseocarneus]        | GCF_003674045.1 |
| WP_122257475.1 | GT4+B12-binding+RADICAL-SAM*→                                                                | GT4+B12-binding+RADICAL-SAM   | 1421 | ALP97_05253    | Gamma-proteobacteria | <i>Pseudomonas salomonii</i>      | radical SAM protein [Pseudomonas salomonii]                              | -               |
| WP_122528181.1 | STAND+TPR+GT4*→                                                                              | STAND+TPR+GT4                 | 1067 | EE945_RS06325  | Gamma-proteobacteria | <i>Pseudomonas viridiflava</i>    | glycosyltransferase [Pseudomonas viridiflava]                            | GCF_900580695.1 |
| WP_123299261.1 | GT4+B12-binding+RADICAL-SAM*→   <?  ?→?→   <?<?<?<?  MODE-HTH+PBPII→                         | GT4+B12-binding+RADICAL-SAM   | 1405 | EC845_RS16630  | Beta-proteobacteria  | <i>Comamonas sp. BIGb0124</i>     | cobalamin B12-binding domain-containing protein [Comamonas sp. BIGb0124] | GCF_003752175.1 |
| WP_123439297.1 | <-TPR+Caspase<-CATASP  CATRA-N+CATRA-C+GT4*→ HTH+APATPase+TPR→   <-HTH  ?→?→?→   <-?<-CATASP | CATRA-N+CATRA-C+GT4           | 694  | EDD94_RS26400  | Actinobacteria       | <i>Streptomyces sp. PanSC9</i>    | glycosyltransferase family 4 protein [Streptomyces sp. PanSC9]           | GCF_003751985.1 |
| WP_124130642.1 | STAND+GT4*→                                                                                  | STAND+GT4                     | 1082 | CJU35_RS32065  | Gamma-proteobacteria | <i>Pseudomonas aeruginosa</i>     | glycosyltransferase [Pseudomonas aeruginosa]                             | GCF_901482505.1 |
| WP_124284015.1 | NUDIX→?→   <?  ?→ MNS+GT4*→                                                                  | MNS+GT4                       | 1151 | EES39_RS04745  | Actinobacteria       | <i>Streptomyces sp. ADI92-24</i>  | glycosyltransferase [Streptomyces sp. ADI92-24]                          | GCF_003846195.1 |
| WP_124458549.1 | STAND+TPR+GT4*→   <?<?<?<?  Calcineurin→                                                     | STAND+TPR+GT4                 | 1054 | DBV14_RS07405  | Beta-proteobacteria  | <i>Variovorax sp. KBW07</i>       | glycosyltransferase [Variovorax sp. KBW07]                               | GCF_003852515.1 |

| acc            | operon                                                                                                                     | architecture                               | len  | gen.name        | taxend               | species                          | define                                                                          | gca             |
|----------------|----------------------------------------------------------------------------------------------------------------------------|--------------------------------------------|------|-----------------|----------------------|----------------------------------|---------------------------------------------------------------------------------|-----------------|
| WP_125624986.1 | Multi-TM→?→ STAND→?→ DUF4913→?→ GT4*→?→ Zeta_toxin→   <-ABC_tran                                                           | GT4                                        | 547  | DMH02_RS17910   | Actinobacteria       | Streptomyces sp. WAC 00631       | glycosyltransferase family 4 protein [Streptomyces sp. WAC 00631]               | GCF_003947265.1 |
| WP_125642507.1 | MNS+GT4*→                                                                                                                  | MNS+GT4                                    | 1274 | EF918_07135     | Actinobacteria       | Streptomyces sp. WAC06614        | glycosyltransferase [Streptomyces sp. WAC06614]                                 | -               |
| WP_125650904.1 | Caspase+NACHT+GT4*→                                                                                                        | Caspase+NACHT+GT4                          | 1208 | EF918_25550     | Actinobacteria       | Streptomyces sp. WAC06614        | glycosyltransferase [Streptomyces sp. WAC06614]                                 | -               |
| WP_125870434.1 | GT4+B12-binding+RADICAL-SAM*→                                                                                              | GT4+B12-binding+RADICAL-SAM                | 1426 | EGJ08_07220     | Gamma-proteobacteria | Pseudomonas stutzeri             | radical SAM protein [Pseudomonas stutzeri]                                      | -               |
| WP_125995743.1 | NACHT+GT4*→                                                                                                                | NACHT+GT4                                  | 1650 | BRX43_RS14143   | Alphaproteobacteria  | Sphingomonas sp. S-NIH.Pt15_0812 | glycosyltransferase [Sphingomonas sp. S-NIH.Pt15_0812]                          | GCF_003951315.1 |
| WP_127872272.1 | NACHT+GT4*→   <-Vsr                                                                                                        | NACHT+GT4                                  | 1637 | EN845_RS20190   | Alphaproteobacteria  | unclassified Mesorhizobium       | MULTISPECIES: glycosyltransferase family 4 protein [unclassified Mesorhizobium] | -               |
| WP_128145588.1 | MPTase→ WXG+SecA→?→?→ GT4+TetR-HTH+TetR-HTH+Tox-ART-RSE+LuxR-HTH*→?→?→ ABhydrolase→                                        | GT4+TetR-HTH+TetR-HTH+Tox-ART-RSE+LuxR-HTH | 2725 | NCTC13184_06625 | Actinobacteria       | Nocardia africana                | glycosyltransferase [Nocardia africana]                                         | -               |
| WP_129557405.1 | <-TnpB_IS66<-HTH_Tnp_1  ?→ SIG+GT4→ GT4→<br>tRNA→   <-?<-PSE  ?→   <-?<-PSE<-?<-?  Calcineurin→   <-cNMP_binding+HTH_Crp_2 | SIG+GT4                                    | 316  | NK6_RS51120     | Alphaproteobacteria  | Bradyrhizobium diazoefficiens    | glycosyltransferase [Bradyrhizobium diazoefficiens]                             | GCF_001549695.1 |
| WP_130174915.1 | GT4+B12-binding+RADICAL-SAM*→                                                                                              | GT4+B12-binding+RADICAL-SAM                | 1409 | EUX58_RS06686   | Gamma-proteobacteria | Pseudomonas                      | MULTISPECIES: radical SAM protein [Pseudomonas]                                 | GCF_005930695.1 |
| WP_130264935.1 | GT4+APATPase+TPR+TPR*→   <-MODE-HTH+PBPII                                                                                  | GT4+APATPase+TPR+TPR                       | 1330 | EXN22_RS15726   | Gamma-proteobacteria | Pseudomonas sp. SNU WT1          | glycosyltransferase family 4 protein [Pseudomonas sp. SNU WT1]                  | GCF_004214895.1 |
| WP_130343732.1 | WXG+TM+EDA39C+Papain+Caspase+GT4*→?→ GT4→                                                                                  | WXG+TM+EDA39C+Papain+Caspase+GT4           | 2616 | EV193_RS09710   | Actinobacteria       | Herbihabitans rhizosphaerae      | glycosyltransferase [Herbihabitans rhizosphaerae]                               | GCF_004216555.1 |
| WP_130721989.1 | CASPASE→?→?→?→ GT4*→                                                                                                       | GT4                                        | 606  | ELI52_RS15625   | Alphaproteobacteria  | Rhizobium leguminosarum          | glycosyltransferase [Rhizobium leguminosarum]                                   | GCF_004303135.1 |

| acc            | operon                                                                                                     | architecture                     | len  | gen.name      | taxend              | species                        | define                                                            | gca             |
|----------------|------------------------------------------------------------------------------------------------------------|----------------------------------|------|---------------|---------------------|--------------------------------|-------------------------------------------------------------------|-----------------|
| WP_131447141   | Ribosomal_L20<-?<-?<-?<-tRNA  ?>    <-?<-?<-PSE  APATPase+GT4+TPR+TPR+TPR+TPR+TPR*->    <-?  ?> ABC_tran-> | APATPase+GT4+TPR+TPR+TPR+TPR+TPR | 1789 | EZJ19_RS09965 | Betaproteobacteria  | Thiobacillaceae bacterium LSR1 | tetratricopeptide repeat protein [Thiobacillaceae bacterium LSR1] | GCF_004337445.1 |
| WP_131728683.1 | GT4+STAND+TPR+TPR*->                                                                                       | GT4+STAND+TPR+TPR                | 1465 | AOZ47_RS33140 | Betaproteobacteria  | Achromobacter xylosoxidans     | tetratricopeptide repeat protein [Achromobacter xylosoxidans]     | GCF_001299055.1 |
| WP_131738585.1 | <-VWA+APATPase+TPR+TPR+TPR+TPR<-STAND<-?  GT4*->?>    <-?  MFS->                                           | GT4                              | 696  | E1291_RS15920 | Actinobacteria      | Actinomadura roseirufa         | glycosyltransferase family 4 protein [Actinomadura roseirufa]     | GCF_900659635.1 |
| WP_131761874.1 | <-cNMP_binding+HTH_Crp_2  GT4*->    <-HTH+APATPase+TPR  ?>    <-cNMP_binding+HTH_Crp_2                     | GT4                              | 466  | E1300_RS37495 | Actinobacteria      | Actinomadura fibrosa           | glycosyltransferase family 4 protein [Actinomadura fibrosa]       | GCF_900659615.1 |
| WP_132113254.1 | GT4*->    <-TPR                                                                                            | GT4                              | 404  | EV192_RS08750 | Actinobacteria      | Actinocrispum wychmicini       | glycosyltransferase family 4 protein [Actinocrispum wychmicini]   | GCF_004345645.1 |
| WP_132114377.1 | cNMP_binding+HTH_Crp_2-> GT4*->    <-ACYC+APATPase+TPR                                                     | GT4                              | 407  | EV192_RS12015 | Actinobacteria      | Actinocrispum wychmicini       | glycosyltransferase family 4 protein [Actinocrispum wychmicini]   | GCF_004345645.1 |
| WP_132118129.1 | EAD1+fvmYukDl-Nterm+GT4*->                                                                                 | EAD1+fvmYukDl-Nterm+GT4          | 667  | EV192_RS21815 | Actinobacteria      | Actinocrispum wychmicini       | glycosyltransferase family 4 protein [Actinocrispum wychmicini]   | GCF_004345645.1 |
| WP_132175767.1 | GT4*->                                                                                                     | GT4                              | 453  | E1263_RS36055 | Actinobacteria      | Kribbella antibiotica          | glycosyltransferase family 4 protein [Kribbella antibiotica]      | GCF_004349055.1 |
| WP_132323823.1 | GT4*->                                                                                                     | GT4                              | 446  | E1218_RS23930 | Actinobacteria      | Kribbella sp. 16K104           | glycosyltransferase family 4 protein [Kribbella sp. 16K104]       | GCF_004348725.1 |
| WP_133190629.1 | GT4+B12-binding+RADICAL-SAM*->                                                                             | GT4+B12-binding+RADICAL-SAM      | 1398 | E1N52_RS41050 | Betaproteobacteria  | Paraburkholderia guartelaensis | radical SAM protein [Paraburkholderia guartelaensis]              | GCF_004353905.1 |
| WP_133255578.1 | <-MODE-HTH+PBPII  ?>    <-MODE-HTH+PBPII  ?>?>?>?> NACHT+GT4*->                                            | NACHT+GT4                        | 1640 | CPJ17_RS11090 | Alphaproteobacteria | Rhizobium tumorigenes          | glycosyltransferase [Rhizobium tumorigenes]                       | GCF_003240565.1 |

| acc            | operon                                                                                                                              | architecture                | len  | gen.name      | taxend               | species                      | define                                                              | gca             |
|----------------|-------------------------------------------------------------------------------------------------------------------------------------|-----------------------------|------|---------------|----------------------|------------------------------|---------------------------------------------------------------------|-----------------|
| WP_133739590.1 | STAND→?→?→ DUF4913→    <-AbiEii<-AbiEi_4  ?→ GT4*→                                                                                  | GT4                         | 493  | EV190_RS01575 | Actinobacteria       | Actinorugispora endophytica  | glycosyltransferase family 4 protein [Actinorugispora endophytica]  | GCF_004363075.1 |
| WP_133854316.1 | Helicase_C→ SIG+DUF1998→    <-?  ?→?→    <-?  ?→ GT4→ TIR+APATPase+TPR→ TPR+Caspase→    <-TPR+Caspase<-CATASP  CATRA-N+CATRA-C+GT4→ | GT4                         | 423  | EV186_RS37520 | Actinobacteria       | Labedaea rhizosphaerae       | glycosyltransferase family 4 protein [Labedaea rhizosphaerae]       | GCF_004362825.1 |
| WP_133925636.1 | GT4*→                                                                                                                               | GT4                         | 622  | EV573_RS04015 | Actinobacteria       | Streptomyces sp. BK161       | glycosyltransferase [Streptomyces sp. BK161]                        | GCF_004364215.1 |
| WP_133927416.1 | SWACOS+GT4*→    <-?<-?  ?→    <-?<-?<-ABC_tran                                                                                      | SWACOS+GT4                  | 1159 | EV573_RS13335 | Actinobacteria       | Streptomyces sp. BK161       | glycosyltransferase [Streptomyces sp. BK161]                        | GCF_004364215.1 |
| WP_133932223.1 | <-Sigma<-?<-TPR  GT4*→                                                                                                              | GT4                         | 410  | EV573_RS39315 | Actinobacteria       | Streptomyces sp. BK161       | glycosyltransferase family 4 protein [Streptomyces sp. BK161]       | GCF_004364215.1 |
| WP_134939719.1 | GT4+B12-binding+RADICAL-SAM*→                                                                                                       | GT4+B12-binding+RADICAL-SAM | 1421 | BZ164_RS25605 | Gamma-proteobacteria | Pseudomonas veronii          | radical SAM protein [Pseudomonas veronii]                           | -               |
| WP_135904996.1 | <-Vsr  ?→?→?→    <-?<-?  GT4+Trypsin+PNPase*→                                                                                       | GT4+Trypsin+PNPase          | 836  | EN818_RS17550 | Alphaproteobacteria  | unclassified Mesorhizobium   | MULTISPECIES: glycosyltransferase [unclassified Mesorhizobium]      | -               |
| WP_136526013.1 | SWACOS+GT4*→                                                                                                                        | SWACOS+GT4                  | 1144 | E8L22_RS15545 | Deltaproteobacteria  | Geomonas ferrireducens       | glycosyltransferase [Geomonas ferrireducens]                        | -               |
| WP_136738577.1 | GT4*→                                                                                                                               | GT4                         | 394  | FCH28_RS05590 | Actinobacteria       | Streptomyces sp. jys28       | glycosyltransferase family 4 protein [Streptomyces sp. jys28]       | GCF_005048155.1 |
| WP_136743126.1 | MNS+GT4*→                                                                                                                           | MNS+GT4                     | 1188 | FCH28_RS29075 | Actinobacteria       | Streptomyces sp. jys28       | glycosyltransferase [Streptomyces sp. jys28]                        | GCF_005048155.1 |
| WP_138637396.1 | NUDIX→?→ GT4*→                                                                                                                      | GT4                         | 432  | ETD96_RS16755 | Actinobacteria       | Actinomadura geliboluenensis | glycosyltransferase family 4 protein [Actinomadura geliboluenensis] | GCF_005889745.1 |
| WP_141100843.1 | GT4+HD*→                                                                                                                            | GT4+HD                      | 1421 | CDN99_RS17245 | Betaproteobacteria   | Roseateles aquatilis         | HD domain-containing protein [Roseateles aquatilis]                 | GCF_002205645.1 |



| acc            | operon                                                                                                                                                                                                                     | architecture                                                                                                                                                                                                 | len   | gen.name      | taxend                  | species                         | define                                                        | gca             |
|----------------|----------------------------------------------------------------------------------------------------------------------------------------------------------------------------------------------------------------------------|--------------------------------------------------------------------------------------------------------------------------------------------------------------------------------------------------------------|-------|---------------|-------------------------|---------------------------------|---------------------------------------------------------------|-----------------|
| WP_143788398.1 | STAND+TPR+GT4*→                                                                                                                                                                                                            | STAND+TPR+GT4                                                                                                                                                                                                | 1136  | BUS12_RS18573 | Betapro-<br>teobacteria | Paraburkholderia<br>phenazinium | glycosyltrans-<br>ferase<br>[Paraburkholderia<br>phenazinium] | GCF_000142845.1 |
| WP_143860247.1 | WXG+MPTase→ WXG+SecA+LuxR-HTH+LuxR-HTH+LuxR-HTH+LuxR-HTH+ST-Hiskin+MPTase+GT4+TetR-HTH+TetR-<br>HTH+Tox-ART-RSE+LuxR-HTH+LuxR-HTH+LuxR-HTH+GNT-RHTH+LuxR-HTH+LuxR-HTH+ST-Hiskin+ST-Hiskin+XPC-<br>C+TM+TM+TM+TM+LuxR-HTH*→ | WXG+SecA+LuxR-HTH+LuxR-HTH+LuxR-HTH+LuxR-HTH+ST-Hiskin+MPTase+GT4+TetR-HTH+TetR-<br>HTH+Tox-ART-RSE+LuxR-HTH+LuxR-HTH+LuxR-HTH+GNT-RHTH+LuxR-HTH+LuxR-HTH+ST-Hiskin+ST-<br>Hiskin+XPC-C+TM+TM+TM+TM+LuxR-HTH | 11649 | B7C42_RS30150 | Actinobacte-<br>ria     | Nocardia<br>cerradoensis        | MFS transporter,<br>partial [Nocardia<br>cerradoensis]        | GCF_002236815.1 |
| WP_144299077.1 | GT4+B12-binding+RADICAL-SAM*→                                                                                                                                                                                              | GT4+B12-binding+RADICAL-SAM                                                                                                                                                                                  | 1385  | VARPA_RS03313 | Betapro-<br>teobacteria | Variovorax<br>paradoxus         | radical SAM<br>protein<br>[Variovorax<br>paradoxus]           | GCF_000184745.1 |
| WP_144384941.1 | Multi-TM→?→ STAND→?→ DUF4913→?→ GT4*→                                                                                                                                                                                      | GT4                                                                                                                                                                                                          | 497   | CD790_RS21520 | Actinobacte-<br>ria     | Streptomyces sp.<br>SAJ15       | glycosyltrans-<br>ferase<br>[Streptomyces sp.<br>SAJ15]       | GCF_007595705.1 |
| WP_145763552.1 | NUDIX→?→ MNS+GT4*→                                                                                                                                                                                                         | MNS+GT4                                                                                                                                                                                                      | 1151  | FHX80_RS07940 | Actinobacte-<br>ria     | Streptomyces<br>brevispora      | glycosyltrans-<br>ferase<br>[Streptomyces<br>brevispora]      | GCF_007829885.1 |
| WP_145809941.1 | MNS+GT4*→?→?→   <-?  ?→ CSD→                                                                                                                                                                                               | MNS+GT4                                                                                                                                                                                                      | 1180  | FHW51_RS26100 | Actinobacte-<br>ria     | Streptomyces<br>argenteolus     | glycosyltrans-<br>ferase<br>[Streptomyces<br>argenteolus]     | GCF_007829855.1 |
| WP_145818563.1 | <-TPR+Caspase  GT4*→?→   <-?<-?<-ABC_tran                                                                                                                                                                                  | GT4                                                                                                                                                                                                          | 546   | JD81_RS15875  | Actinobacte-<br>ria     | Micromonospora<br>sagamiensis   | glycosyltrans-<br>ferase<br>[Micromonospora<br>sagamiensis]   | GCF_014680085.1 |
| WP_145835614.1 | <-TPR+Caspase  GT4*→                                                                                                                                                                                                       | GT4                                                                                                                                                                                                          | 546   | JD80_RS20680  | Actinobacte-<br>ria     | Micromonospora<br>echinospora   | glycosyltrans-<br>ferase<br>[Micromonospora<br>echinospora]   | GCF_007829475.1 |
| WP_145885265.1 | ABhydrolase→   <-?<-?  ?→   <-?  ?→?→ MNS+GT4*→                                                                                                                                                                            | MNS+GT4                                                                                                                                                                                                      | 1144  | FB157_RS37885 | Actinobacte-<br>ria     | Streptomyces sp.<br>BK340       | glycosyltrans-<br>ferase<br>[Streptomyces sp.<br>BK340]       | GCF_007827595.1 |
| WP_145921569.1 | WXG+TM+GT4+GT4*→                                                                                                                                                                                                           | WXG+TM+GT4+GT4                                                                                                                                                                                               | 3484  | FJK98_RS27630 | Actinobacte-<br>ria     | Micromonospora<br>sp. HM134     | glycosyltrans-<br>ferase<br>[Micromonospora<br>sp. HM134]     | GCF_007833915.1 |
| WP_146161220   | WXG+MPTase→ WXG+LuxR-HTH+LuxR-HTH+LuxR-HTH+LuxR-HTH+TetR-HTH+TetR-HTH+LuxR-HTH+LuxR-HTH+LexA-<br>HTH+LuxR-HTH+LuxR-HTH+LuxR-HTH+LuxR-HTH+LuxR-HTH+PP2C*→?→<br>ABhydrolase→                                                 | WXG+LuxR-HTH+LuxR-HTH+LuxR-HTH+LuxR-HTH+TetR-HTH+TetR-HTH+LuxR-HTH+LuxR-HTH+LexA-<br>HTH+LuxR-HTH+LuxR-HTH+LuxR-HTH+LuxR-HTH+LuxR-HTH+PP2C                                                                   | 14195 | C8258_RS13420 | Actinobacte-<br>ria     | Nocardia sp.<br>MDA0666         | MFS transporter<br>[Nocardia sp.<br>MDA0666]                  | GCF_003023875.1 |
| WP_146241295.1 | APATPase+TPR→   <-?  GT4*→?→?→ GT4→                                                                                                                                                                                        | GT4                                                                                                                                                                                                          | 502   | DFQ13_RS33200 | Actinobacte-<br>ria     | Actinokineospora<br>mزابensis   | glycosyltrans-<br>ferase<br>[Actinokineospora<br>mزابensis]   | -               |
| WP_146349043.1 | <-APATPase<-APATPase  ?→ NLPC→ cNMP_binding+HTH_Crp_2→?→ GT4*→   <-ACYC+APATPase+TPR                                                                                                                                       | GT4                                                                                                                                                                                                          | 408   | FKR81_RS01510 | Actinobacte-<br>ria     | Lentzea sp.<br>FXJ1.1311        | glycosyltrans-<br>ferase [Lentzea sp.<br>FXJ1.1311]           | GCF_007845675.1 |



| acc            | operon                                                                             | architecture                           | len  | gen.name      | taxend              | species                    | define                                              | gca             |
|----------------|------------------------------------------------------------------------------------|----------------------------------------|------|---------------|---------------------|----------------------------|-----------------------------------------------------|-----------------|
| WP_147321781.1 | SWACOS+GT4*→    <-?<-MFS                                                           | SWACOS+GT4                             | 1096 | BX279_RS09075 | Actinobacteria      | Streptomyces sp. Ag82_O1-9 | glycosyltransferase<br>[Streptomyces sp. Ag82_O1-9] | GCF_003386845.1 |
| WP_147416956.1 | STAND→?→?→ DUF4913→    <-AbiEii<-AbiEi_4  ?→ GT4*→ AbiEi_4→                        | GT4                                    | 495  | NI17_RS16590  | Actinobacteria      | Thermobifida halotolerans  | glycosyltransferase<br>[Thermobifida halotolerans]  | GCF_003574835.1 |
| WP_147994072.1 | TRPR-HTH+PBPI→?→?→    <-TPR+Caspase  GT4*→                                         | GT4                                    | 597  | EAO75_RS06975 | Actinobacteria      | Streptomyces sp. uw30      | glycosyltransferase<br>[Streptomyces sp. uw30]      | GCF_008042075.1 |
| WP_148348287.1 | SWACOS+GT4*→                                                                       | SWACOS+GT4                             | 1238 | FXF65_RS04105 | Actinobacteria      | Actinomadura syzygii       | glycosyltransferase<br>[Actinomadura syzygii]       | -               |
| WP_148640710.1 | MNS+GT4*→                                                                          | MNS+GT4                                | 1142 | EH183_RS01595 | Actinobacteria      | Streptomyces sp. CB01881   | glycosyltransferase<br>[Streptomyces sp. CB01881]   | GCF_002953255.1 |
| WP_148757712.1 | STAND→ VWA+vWA-L+STAND+TPR+GT4*→ Sigma→?→ ABC_tran→                                | VWA+vWA-L+STAND+TPR+GT4                | 1697 | FXF68_RS05215 | Actinobacteria      | Actinomadura sp. CYP1-5    | glycosyltransferase<br>[Actinomadura sp. CYP1-5]    | GCF_008121305.1 |
| WP_148758378.1 | SWACOS+GT4*→                                                                       | SWACOS+GT4                             | 1147 | FXF68_RS08315 | Actinobacteria      | Actinomadura sp. CYP1-5    | glycosyltransferase<br>[Actinomadura sp. CYP1-5]    | GCF_008121305.1 |
| WP_148759187.1 | GT4*→                                                                              | GT4                                    | 581  | FXF68_RS13230 | Actinobacteria      | Actinomadura sp. CYP1-5    | glycosyltransferase<br>[Actinomadura sp. CYP1-5]    | GCF_008121305.1 |
| WP_149263194.1 | LexA→    <-?  ?→    <-?<-?<-?<-cNMP_binding+HTH_Crp_2  GT4*→    <-HTH+APATPase+TPR | GT4                                    | 459  | K4S16_RS34110 | Actinobacteria      | Actinomadura sp. K4S16     | glycosyltransferase<br>[Actinomadura sp. K4S16]     | GCF_008327685.1 |
| WP_149830792.1 | <-HTH+APATPase+TPR  GT4*→?→    <-?<-?<-?<-?  TPR→                                  | GT4                                    | 419  | F3T56_RS42265 | Actinobacteria      | Streptomyces sp. TRM68348  | glycosyltransferase<br>[Streptomyces sp. TRM68348]  | GCF_008386495.1 |
| WP_149896003.1 | NACHT+GT4*→                                                                        | NACHT+GT4                              | 1646 | DXU01_RS22280 | Alphaproteobacteria | Agrobacterium rosae        | glycosyltransferase<br>[Agrobacterium rosae]        | GCF_008501885.1 |
| WP_151009920.1 | <-cNMP_binding+HTH_Crp_2  GT4*→    <-HTH+APATPase+TPR                              | GT4                                    | 457  | F7P10_RS15075 | Actinobacteria      | Actinomadura sp. WMMB 499  | glycosyltransferase<br>[Actinomadura sp. WMMB 499]  | GCF_008824145.1 |
| WP_153338839.1 | ESX-1_EspG→    <-?<-?  ?→?→?→ WXG+TOXIN-PL+ART+Caspase+ZetaToxin+GT4*→             | WXG+TOXIN-PL+ART+Caspase+ZetaToxin+GT4 | 3261 | NRB56_RS02760 | Actinobacteria      | Nocardia sp. RB56          | zeta toxin family protein [Nocardia sp. RB56]       | GCF_009604425.1 |

| acc            | operon                                                                                      | architecture         | len  | gen.name       | taxend              | species                    | defline                                                   | gca             |
|----------------|---------------------------------------------------------------------------------------------|----------------------|------|----------------|---------------------|----------------------------|-----------------------------------------------------------|-----------------|
| WP_153430492.1 | GT4*→                                                                                       | GT4                  | 1126 | GFJ39_RS06035  | Alphaproteobacteria | Gluconobacter sp. AC10     | glycosyltransferase [Gluconobacter sp. AC10]              | -               |
| WP_153467262.1 | GT4*→                                                                                       | GT4                  | 460  | F7Q99_RS30660  | Actinobacteria      | Streptomyces kaniharaensis | glycosyltransferase [Streptomyces kaniharaensis]          | -               |
| WP_153535837.1 | REase+SFI-ATPase→    <-?  ?→    <-?  ?→ GT4+APATPase+TPR+TPR*→                              | GT4+APATPase+TPR+TPR | 1190 | ACRB68_RS23060 | Actinobacteria      | Actinomadura sp. RB68      | tetratricopeptide repeat protein [Actinomadura sp. RB68]  | -               |
| WP_154363881.1 | TniB→?→ STAND+TPR+GT4*→                                                                     | STAND+TPR+GT4        | 1054 | GJ697_RS09905  | Betaproteobacteria  | Duganella                  | MULTISPECIES: glycosyltransferase [Duganella]             | GCF_009674525.1 |
| WP_155055777.1 | TIR+APATPase+GT4*→                                                                          | TIR+APATPase+GT4     | 772  | GFH49_RS11700  | Actinobacteria      | Streptomyces sp. TRM63209  | TIR domain-containing protein [Streptomyces sp. TRM63209] | GCF_009709555.1 |
| WP_155097668.1 | GT4*→                                                                                       | GT4                  | 609  | GL286_RS21805  | Alphaproteobacteria | Paracoccus aestuariivivens | hypothetical protein [Paracoccus aestuariivivens]         | GCF_009711225.1 |
| WP_155252689.1 | Multi-TM→?→ STAND→?→ DUF4913→    <-?  ?→ GT4*→?→?→?→ NUDIX→                                 | GT4                  | 438  | B170_RS0111915 | Actinobacteria      | Salinispora pacifica       | glycosyltransferase [Salinispora pacifica]                | GCF_000514515.1 |
| WP_156002545.1 | <-AbiEii<-AbiEi_4 AbiEi_4→ AbiEii→    <-AbiEii<-AbiEi_4  ?→ GT4*→    <-DUF4913<-?<-?<-STAND | GT4                  | 494  | FZ103_RS17370  | Actinobacteria      | Streptomonospora sp. PA3   | glycosyltransferase [Streptomonospora sp. PA3]            | GCF_009728995.1 |
| WP_156395661.1 | STAND+GT4*→                                                                                 | STAND+GT4            | 1081 | ASC85_RS19490  | Gammaproteobacteria | Pseudomonas sp. Root401    | glycosyltransferase [Pseudomonas sp. Root401]             | GCF_001425105.1 |
| WP_156427756.1 | APATPase+TPR+GT4*→                                                                          | APATPase+TPR+GT4     | 1394 | ML01_RS15555   | Gammaproteobacteria | Thiohalocapsa sp. ML1      | tetratricopeptide repeat protein [Thiohalocapsa sp. ML1]  | GCF_001469165.1 |
| WP_156551292.1 | NACHT+GT4*→                                                                                 | NACHT+GT4            | 1640 | GOZ95_RS24735  | Alphaproteobacteria | Agrobacterium vitis        | glycosyltransferase [Agrobacterium vitis]                 | GCF_009744055.1 |
| WP_156901549.1 | GT4*→?→    <-?<-?<-?  ?→    <-MFS                                                           | GT4                  | 643  | K328_RS25440   | Alphaproteobacteria | Nisaea denitrificans       | glycosyltransferase, partial [Nisaea denitrificans]       | GCF_000426505.1 |



| acc            | operon                                                                                         | architecture                                                      | len  | gen.name             | taxend              | species                         | defline                                                            | gca             |
|----------------|------------------------------------------------------------------------------------------------|-------------------------------------------------------------------|------|----------------------|---------------------|---------------------------------|--------------------------------------------------------------------|-----------------|
| WP_157204012.1 | GT4+APATPase+TPR*→                                                                             | GT4+APATPase+TPR                                                  | 1141 | A1332_RS13095        | Gammaproteobacteria | Methylomonas methanica          | tetratricopeptide repeat protein, partial [Methylomonas methanica] | -               |
| WP_157224231.1 | WXG+ZetaToxin+GT4*→?→    <-WXG+MPTase                                                          | WXG+ZetaToxin+GT4                                                 | 1061 | ON32_RS18080         | Actinobacteria      | Nocardia paucivorans            | zeta toxin family protein [Nocardia paucivorans]                   | GCF_000308675.1 |
| WP_157229180.1 | MPTase→ WXG+SecA+GT4+TetR-HTH+TetR-HTH+MFS+MFS(12x)+ABhydrolase+ST-HisKin*→    <-?  CSD→       | WXG+SecA+GT4+TetR-HTH+TetR-HTH+MFS+MFS(12x)+ABhydrolase+ST-HisKin | 4779 | ON20_RS32170         | Actinobacteria      | Nocardia brevicatena            | MFS transporter [Nocardia brevicatena]                             | GCF_000308495.1 |
| WP_157355048.1 | GT4*→                                                                                          | GT4                                                               | 618  | ARA48_RS12920        | Bacteroidetes       | Parabacteroides distasonis      | glycosyltransferase [Parabacteroides distasonis]                   | GCF_001405935.1 |
| WP_157419626.1 | <-cNMP_binding+HTH_Crp_2  GT4*→    <-HTH+APATPase+TPR                                          | GT4                                                               | 468  | AKI01S_RS02785       | Actinobacteria      | Actinomadura kijaniata          | glycosyltransferase [Actinomadura kijaniata]                       | GCF_001552175.1 |
| WP_157468665.1 | CATRA-N+CATRA-C+GT4*→    <-TPR+Caspase<-?<-?<-?<-?  CHTH+APATPase+TPR+TPR→ CATASP→             | CATRA-N+CATRA-C+GT4                                               | 825  | FRAQA3DRAFT_RS2240   | Actinobacteria      | Frankia sp. QA3                 | glycosyltransferase [Frankia sp. QA3]                              | GCF_000262465.1 |
| WP_157494479.1 | <-CATASP  CATRA-N+CATRA-C+GT4*→    <-HTH+APATPase+TPR                                          | CATRA-N+CATRA-C+GT4                                               | 786  | KUTG_RS53310         | Actinobacteria      | Kutzneria sp. 744               | glycosyltransferase [Kutzneria sp. 744]                            | -               |
| WP_157528945.1 | ART+Caspase+GT4*→?→ GT4→                                                                       | ART+Caspase+GT4                                                   | 1289 | BN1199_RS39095       | Actinobacteria      | Kibdelosporangium sp. MJ126-NF4 | glycosyltransferase [Kibdelosporangium sp. MJ126-NF4]              | -               |
| WP_157636396.1 | STAND+TPR+GT4*→    <-?  ABhydrolase→    <-TRANSGLUTAMINASE                                     | STAND+TPR+GT4                                                     | 1130 | WL03_RS32310         | Betaproteobacteria  | Burkholderia ubonensis          | glycosyltransferase [Burkholderia ubonensis]                       | GCF_001528155.1 |
| WP_157851161.1 | <-TPR+Caspase<-CATASP  CATRA-N+CATRA-C+GT4*→ HTH+APATPase+TPR→    <-HTH  ?→?→?→    <-?<-CATASP | CATRA-N+CATRA-C+GT4                                               | 703  | IF17_RS1000000138500 | Actinobacteria      | Streptomyces cyaneofuscatus     | glycosyltransferase [Streptomyces cyaneofuscatus]                  | GCF_000718135.1 |
| WP_157856282.1 | ABC_tran→?→?→ NACHT+MNS→?→ GT4*→                                                               | GT4                                                               | 412  | BS72_RS20070         | Actinobacteria      | Streptomyces yeochonensis       | glycosyltransferase [Streptomyces yeochonensis]                    | -               |
| WP_157978213.1 | GT4*→                                                                                          | GT4                                                               | 199  | DAT37_RS00050        | Actinobacteria      | Nocardia sp. SYSU K10002        | hypothetical protein [Nocardia sp. SYSU K10002]                    | -               |
| WP_158075353.1 | <-TPR+Caspase<-CATASP  CATRA-N+CATRA-C+GT4*→ HTH+APATPase+TPR→    <-HTH  ?→?→?→    <-?<-CATASP | CATRA-N+CATRA-C+GT4                                               | 718  | AMK32_RS25155        | Actinobacteria      | Streptomyces sp. CB01883        | glycosyltransferase [Streptomyces sp. CB01883]                     | -               |

| acc            | operon                                                                                              | architecture         | len  | gen.name       | taxend               | species                        | define                                                                    | gca             |
|----------------|-----------------------------------------------------------------------------------------------------|----------------------|------|----------------|----------------------|--------------------------------|---------------------------------------------------------------------------|-----------------|
| WP_158247498.1 | GT4+APATPase+TPR+TPR*→                                                                              | GT4+APATPase+TPR+TPR | 1379 | C1X76_RS08190  | Gamma-proteobacteria | unclassified Pseudomonas       | MULTISPECIES: tetratricopeptide repeat protein [unclassified Pseudomonas] | GCF_017350895.1 |
| WP_158633123.1 | cNMP_binding+HTH_Crp_2→?→ GT4*→   <-ACYC+APATPase+TPR                                               | GT4                  | 391  | DMH03_RS26200  | Actinobacteria       | Amycolatopsis sp. WAC 01376    | glycosyltransferase [Amycolatopsis sp. WAC 01376]                         | GCF_003947415.1 |
| WP_158709116.1 | <-ABC_tran<-?  PSE→   <-?  Caspase+NACHT+GT4*→                                                      | Caspase+NACHT+GT4    | 1143 | D3105_RS04960  | Actinobacteria       | Streptomyces globisporus       | caspase family protein [Streptomyces globisporus]                         | GCF_000718455.1 |
| WP_158893312.1 | <-TIR+APATPase  HTH+APATPase+TPR+GT4*→   <-PSE<-?  ?→?→?→ Sigma→                                    | HTH+APATPase+TPR+GT4 | 1166 | FXO23_RS42605  | Actinobacteria       | Amycolatopsis anabasis         | tetratricopeptide repeat protein [Amycolatopsis anabasis]                 | GCF_009765355.1 |
| WP_159015082.1 | TPR+Caspase<-CATASP  CATRA-N+CATRA-C+GT4*→ HTH+APATPase+TPR→   <-HTH  ?→   <-?<-CATASP<-TPR+Caspase | CATRA-N+CATRA-C+GT4  | 711  | AAV49_RS44335  | Actinobacteria       | Streptomyces europaeiscabiei   | glycosyltransferase [Streptomyces europaeiscabiei]                        | GCF_000988945.1 |
| WP_159058466.1 | <-CATASP  CATRA-N+CATRA-C+GT4*→ HTH+APATPase→                                                       | CATRA-N+CATRA-C+GT4  | 711  | AWZ10_RS35055  | Actinobacteria       | Streptomyces europaeiscabiei   | glycosyltransferase [Streptomyces europaeiscabiei]                        | GCF_001550375.1 |
| WP_159073577.1 | GT4*→                                                                                               | GT4                  | 122  | A6027_RS50895  | Actinobacteria       | Streptomyces sp. RTd22         | hypothetical protein [Streptomyces sp. RTd22]                             | GCF_001640565.1 |
| WP_159388811.1 | MFS→   <-?  GT4+APATPase+TPR*→   <-MODE-HTH+PBPII                                                   | GT4+APATPase+TPR     | 1318 | PspR32_RS15206 | Gamma-proteobacteria | Pseudomonas sp. R32            | glycosyltransferase [Pseudomonas sp. R32]                                 | GCF_009866705.1 |
| WP_159399980.1 | Caspase+NACHT+GT4*→   <-?<-?  PSE→   <-?  ?→   <-?<-MFS                                             | Caspase+NACHT+GT4    | 1145 | AVL59_RS21225  | Actinobacteria       | Streptomyces griseochromogenes | caspase family protein [Streptomyces griseochromogenes]                   | GCF_001542625.1 |
| WP_160448122.1 | ABC_tran→?→ GT4*→   <-?  ?→?→?→   <-?  tRNA→?→ Pribosyltran_N+Pribosyl_synth→                       | GT4                  | 643  | DOU06_RS11775  | Actinobacteria       | Clavibacter michiganensis      | glycosyltransferase [Clavibacter michiganensis]                           | GCF_009793225.1 |
| WP_161065972.1 | DUF4913→ GT4*→                                                                                      | GT4                  | 463  | GR925_RS14975  | Actinobacteria       | Streptomyces sp. HUCO-GS316    | glycosyltransferase [Streptomyces sp. HUCO-GS316]                         | GCF_009827025.1 |
| WP_161268609.1 | CATRA-N+CATRA-C+GT4*→                                                                               | CATRA-N+CATRA-C+GT4  | 703  | GT040_RS36085  | Actinobacteria       | Streptomyces sp. SID2119       | glycosyltransferase [Streptomyces sp. SID2119]                            | GCF_009865505.1 |

| acc            | operon                                                                                       | architecture             | len  | gen.name      | taxend              | species                      | define                                                           | gca             |
|----------------|----------------------------------------------------------------------------------------------|--------------------------|------|---------------|---------------------|------------------------------|------------------------------------------------------------------|-----------------|
| WP_161606588.1 | GT4*→                                                                                        | GT4                      | 962  | BHS06_RS25083 | Deltaproteobacteria | Myxococcus xanthus           | glycosyltransferase [Myxococcus xanthus]                         | GCF_006401635.1 |
| WP_161684505.1 | Sigma→?→?→   <-?<-?<-TPR+Caspase GT4*→   <-PSE<-? ?→   <-TRPR-HTH+PBPI                       | GT4                      | 547  | GVV04_RS04063 | Actinobacteria      | Micromonospora sp. NEAU-HG-1 | glycosyltransferase [Micromonospora sp. NEAU-HG-1]               | GCF_009908295.1 |
| WP_161790163.1 | GT4*→   <-?<-?<-?<-CSD                                                                       | GT4                      | 353  | TR46_RS20005  | Actinobacteria      | Streptacidiphilus carbonis   | glycosyltransferase [Streptacidiphilus carbonis]                 | GCF_000787775.1 |
| WP_162672520.1 | GT4+HEPN+TPR+GreAB-C+PIN*→                                                                   | GT4+HEPN+TPR+GreAB-C+PIN | 1685 | SOIL9_RS38685 | Planctomycetes      | Gemmata massiliana           | glycosyltransferase [Gemmata massiliana]                         | GCF_901538265.1 |
| WP_162688623.1 | Caspase+NACHT+GT4*→   <-?<-?<-?<-?  APATPase→                                                | Caspase+NACHT+GT4        | 1148 | DRB89_RS17703 | Actinobacteria      | unclassified Streptomyces    | MULTISPECIES: caspase family protein [unclassified Streptomyces] | GCF_003287915.1 |
| WP_162948626.1 | <-CATASP  CATRA-N+CATRA-C+GT4*→ HTH+APATPase→                                                | CATRA-N+CATRA-C+GT4      | 711  | CQR77_RS44880 | Actinobacteria      | Streptomyces europaeiscabiei | glycosyltransferase [Streptomyces europaeiscabiei]               | GCF_003584825.1 |
| WP_163053769.1 | Calcineurin→?→?→ NACHT+MNS→ MNS+GT4*→                                                        | MNS+GT4                  | 749  | G3I70_RS06860 | Actinobacteria      | Actinomadura bangladeshensis | glycosyltransferase [Actinomadura bangladeshensis]               | GCF_010548065.1 |
| WP_164236650.1 | <-TPR+Caspase<-CATASP  CATRA-N+CATRA-C+GT4*→ HTH+APATPase+TPR→   <-HTH  ?→?→?→   <-?<-CATASP | CATRA-N+CATRA-C+GT4      | 703  | G3I52_RS10700 | Actinobacteria      | Streptomyces cyaneofuscatus  | glycosyltransferase [Streptomyces cyaneofuscatus]                | GCF_010548165.1 |
| WP_164336692.1 | Calcineurin→?→?→ Caspase+NACHT+GT4*→                                                         | Caspase+NACHT+GT4        | 1126 | G3I38_RS20825 | Actinobacteria      | Streptomyces sp. SID7958     | caspase family protein [Streptomyces sp. SID7958]                | GCF_010550365.1 |
| WP_164374106.1 | NACHT→ GT4→   <-?<-PSE<-?<-?<-?  HTH+APATPase→ TPR→   <-GT4                                  | GT4                      | 405  | G3I62_RS29240 | Actinobacteria      | Streptomyces sp. SID14446    | glycosyltransferase [Streptomyces sp. SID14446]                  | GCF_010548515.1 |
| WP_164374112.1 | -                                                                                            | -                        | 402  | G3I62_RS29280 | Actinobacteria      | Streptomyces sp. SID14446    | glycosyltransferase [Streptomyces sp. SID14446]                  | GCF_010548515.1 |
| WP_164438832.1 | Calcineurin→?→?→ Caspase+NACHT+GT4*→                                                         | Caspase+NACHT+GT4        | 1113 | G3I53_RS25925 | Actinobacteria      | Streptomyces sp. SID14436    | caspase family protein [Streptomyces sp. SID14436]               | GCF_010548465.1 |
| WP_164932131.1 | <-HTH+APATPase+TPR  GT4*→?→   <-?<-?<-?  TPR→                                                | GT4                      | 394  | DBB27_RS07160 | Actinobacteria      | unclassified Streptomyces    | MULTISPECIES: glycosyltransferase [unclassified Streptomyces]    | GCF_004104505.1 |

| acc            | operon                                                                                                                                                                                                                                                                     | architecture                                                                                                                                                                                                                                  | len   | gen.name      | taxend              | species                              | defline                                                                | gca             |
|----------------|----------------------------------------------------------------------------------------------------------------------------------------------------------------------------------------------------------------------------------------------------------------------------|-----------------------------------------------------------------------------------------------------------------------------------------------------------------------------------------------------------------------------------------------|-------|---------------|---------------------|--------------------------------------|------------------------------------------------------------------------|-----------------|
| WP_165781010.1 | GT4*→                                                                                                                                                                                                                                                                      | GT4                                                                                                                                                                                                                                           | 631   | CR156_RS18515 | Gammaproteobacteria | Stenotrophomonas lactitubi           | glycosyltransferase [Stenotrophomonas lactitubi]                       | GCF_014763005.1 |
| WP_166659524.1 | -                                                                                                                                                                                                                                                                          | -                                                                                                                                                                                                                                             | 752   | EV186_RS37545 | Actinobacteria      | Labedaea rhizosphaerae               | glycosyltransferase family 4 protein [Labedaea rhizosphaerae]          | GCF_004362825.1 |
| WP_167375417.1 | APATPase+GT4*→                                                                                                                                                                                                                                                             | APATPase+GT4                                                                                                                                                                                                                                  | 1344  | AWM79_RS04505 | Gammaproteobacteria | Pseudomonas agarici                  | glycosyltransferase [Pseudomonas agarici]                              | GCF_001543125.1 |
| WP_167485160.1 | <-ESX-1_EspG<-?<-?<-?  ?→?→ WXG+PolB-NTase+GT4+GT4+Caspase*→?→?→ GT4→                                                                                                                                                                                                      | WXG+PolB-NTase+GT4+GT4+Caspase                                                                                                                                                                                                                | 2733  | F6W96_RS05200 | Actinobacteria      | Nocardia terpenica                   | glycosyltransferase [Nocardia terpenica]                               | GCF_011801165.1 |
| WP_167531487.1 | NACHT+GT4*→   <-Vsr                                                                                                                                                                                                                                                        | NACHT+GT4                                                                                                                                                                                                                                     | 1557  | EN799_RS48175 | Alphaproteobacteria | Mesorhizobium sp. M8A.F.Ca.ET.197.01 | glycosyltransferase [Mesorhizobium sp. M8A.F.Ca.ET.197.01.1.1]         | GCF_004791385.1 |
| WP_167631834.1 | GT4+APATPase+TPR*→                                                                                                                                                                                                                                                         | GT4+APATPase+TPR                                                                                                                                                                                                                              | 1107  | HCI87_RS07630 | Zetaproteobacteria  | Mariprofundus ferrooxydans           | tetratricopeptide repeat protein, partial [Mariprofundus ferrooxydans] | GCF_011947535.1 |
| WP_167983001.1 | CATRA-N+CATRA-C+GT4*→ HTH+APATPase+TPR→   <-HTH  ?→?→?→   <-?<-CATASP                                                                                                                                                                                                      | CATRA-N+CATRA-C+GT4                                                                                                                                                                                                                           | 845   | HCN08_RS12120 | Actinobacteria      | Streptomyces sp. PRB2-1              | glycosyltransferase family 4 protein [Streptomyces sp. PRB2-1]         | GCF_012034175.1 |
| WP_167985631.1 | GT4*→                                                                                                                                                                                                                                                                      | GT4                                                                                                                                                                                                                                           | 425   | HCN08_RS25733 | Actinobacteria      | Streptomyces sp. PRB2-1              | glycosyltransferase [Streptomyces sp. PRB2-1]                          | GCF_012034175.1 |
| WP_168028895.1 | <-ABC_tran<-?<-?<-?<-?  ?→ GT4+APATPase*→                                                                                                                                                                                                                                  | GT4+APATPase                                                                                                                                                                                                                                  | 988   | HC024_RS03995 | Gammaproteobacteria | Methylococcaceae bacterium WWC4      | glycosyltransferase, partial [Methylococcaceae bacterium WWC4]         | -               |
| WP_168031569.1 | GT4*→                                                                                                                                                                                                                                                                      | GT4                                                                                                                                                                                                                                           | 644   | HC024_RS14290 | Gammaproteobacteria | Methylococcaceae bacterium WWC4      | glycosyltransferase, partial [Methylococcaceae bacterium WWC4]         | -               |
| WP_168435140.1 | WXG+MPTase→ WXG+SecA+LuxR-HTH+LuxR-HTH+LuxR-HTH+LuxR-HTH+ST-HisKin+MPTase+GT4+TetR-HTH+TetR-HTH+Tox-ART-RSE+LuxR-HTH+LuxR-HTH+LuxR-HTH+GNTR-HTH+LuxR-HTH+LuxR-HTH+ST-HisKin+ST-HisKin+XPC-C+TM+TM+TM+TM+LuxR-HTH+PP2C+MPTase+MPTase+LuxR-HTH+LuxR-HTH+DOC*→?→ ABhydrolase→ | WXG+SecA+LuxR-HTH+LuxR-HTH+LuxR-HTH+LuxR-HTH+ST-HisKin+MPTase+GT4+TetR-HTH+TetR-HTH+Tox-ART-RSE+LuxR-HTH+LuxR-HTH+LuxR-HTH+GNTR-HTH+LuxR-HTH+LuxR-HTH+ST-HisKin+ST-HisKin+XPC-C+TM+TM+TM+TM+LuxR-HTH+PP2C+MPTase+MPTase+LuxR-HTH+LuxR-HTH+DOC | 13688 | HGB45_RS23560 | Actinobacteria      | Nocardia cerradoensis                | MFS transporter [Nocardia cerradoensis]                                | GCF_012396065.1 |
| WP_168477813.1 | GT4*→?→?→   <-?  ?→   <-NUDIX                                                                                                                                                                                                                                              | GT4                                                                                                                                                                                                                                           | 455   | HEP86_RS05755 | Actinobacteria      | Streptomyces sp. RPA4-5              | glycosyltransferase [Streptomyces sp. RPA4-5]                          | GCF_012273495.1 |

| acc            | operon                                                                                 | architecture                | len  | gen.name       | taxend              | species                       | define                                                                | gca             |
|----------------|----------------------------------------------------------------------------------------|-----------------------------|------|----------------|---------------------|-------------------------------|-----------------------------------------------------------------------|-----------------|
| WP_168512294.1 | <-ABhydrolase  ?->?> GT4*->   <-?  TRPR-HTH+PBPI->                                     | GT4                         | 650  | HEP87_RS39620  | Actinobacteria      | Streptomyces sp. S1D4-11      | glycosyltransferase [Streptomyces sp. S1D4-11]                        | -               |
| WP_169316088.1 | APATPase+GT4*->   <-?<-?<-?<-?  ?>   <-?<-PSE  GST_N_2+GST_C->                         | APATPase+GT4                | 1344 | PA-GAR_RS28405 | Gammaproteobacteria | Pseudomonas agarici           | glycosyltransferase [Pseudomonas agarici]                             | GCF_000280785.1 |
| WP_169804810.1 | GT4+APATPase*->                                                                        | GT4+APATPase                | 986  | HTA01S_RS24384 | Delepherothecae     | Hydrogenophaga taeniospiralis | glycosyltransferase, partial [Hydrogenophaga taeniospiralis]          | GCF_001592305.1 |
| WP_169807203.1 | GT4*->                                                                                 | GT4                         | 449  | AWW66_RS34117  | Actinobacteria      | Micromonospora rosaria        | glycosyltransferase, partial [Micromonospora rosaria]                 | GCF_001567585.1 |
| WP_169850673.1 | GT4+B12-binding+RADICAL-SAM*->                                                         | GT4+B12-binding+RADICAL-SAM | 1115 | HBO43_RS21616  | Gammaproteobacteria | Pseudomonas veronii           | cobalamin B12-binding domain-containing protein [Pseudomonas veronii] | GCF_012985315.1 |
| WP_170285467.1 | SWACOS+GT4*->?>   <-?  ?> PadR->                                                       | SWACOS+GT4                  | 1175 | FHX75_RS26815  | Actinobacteria      | Micromonospora palomenae      | glycosyltransferase [Micromonospora palomenae]                        | GCF_007829925.1 |
| WP_171081495.1 | GT4*->                                                                                 | GT4                         | 489  | HG542_RS14775  | Actinobacteria      | Streptomyces morookaense      | glycosyltransferase [Streptomyces morookaense]                        | GCF_014656115.1 |
| WP_171579219.1 | <-SIG+RCDG1+YidC_periplas+60KD_IMP<-?<-?  ?> tRNA->?> NACHT+GT4*->?>?>?>?>?> DUF4242-> | NACHT+GT4                   | 1638 | HCN58_RS10240  | Alphaproteobacteria | Bradyrhizobium sp. WSM 1791   | glycosyltransferase [Bradyrhizobium sp. WSM 1791]                     | GCF_013114825.1 |
| WP_171675029.1 | GT4*->                                                                                 | GT4                         | 451  | HNR71_RS02445  | Actinobacteria      | Kribbella sandramycini        | glycosyltransferase [Kribbella sandramycini]                          | GCF_013131805.1 |
| WP_171901162.1 | -                                                                                      | -                           | 147  | NK6_RS51125    | Alphaproteobacteria | Bradyrhizobium diazoefficiens | glycosyltransferase [Bradyrhizobium diazoefficiens]                   | GCF_001549695.1 |
| WP_172109703.1 | SWACOS+GT4*->                                                                          | SWACOS+GT4                  | 1148 | HL667_RS06640  | Alphaproteobacteria | Bradyrhizobium sp. 83012      | glycosyltransferase [Bradyrhizobium sp. 83012]                        | GCF_013178925.1 |
| WP_172132695.1 | SWACOS+GT4*->                                                                          | SWACOS+GT4                  | 1148 | HL666_RS23775  | Alphaproteobacteria | unclassified Bradyrhizobium   | MULTISPECIES: glycosyltransferase [unclassified Bradyrhizobium]       | GCF_013178945.1 |



| acc            | operon                                                                             | architecture                | len  | gen.name      | taxend              | species                           | define                                                                         | gca             |
|----------------|------------------------------------------------------------------------------------|-----------------------------|------|---------------|---------------------|-----------------------------------|--------------------------------------------------------------------------------|-----------------|
| WP_172175287.1 | GT4+B12-binding+RADICAL-SAM*→                                                      | GT4+B12-binding+RADICAL-SAM | 1278 | GNZ13_RS39275 | Deltaproteobacteria | Paraburkholderia sp. 5N           | radical SAM protein [Paraburkholderia sp. 5N]                                  | GCF_013177735.1 |
| WP_173124146.1 | <-STAND<-?<-?<-?<-?  cNMP_binding+HTH_Crp_2→?→ GT4*→   <-ACYC+APATPase+TPR         | GT4                         | 409  | GC106_RS03330 | Actinobacteria      | Kibdelosporangium sp. 4NS15       | glycosyltransferase [Kibdelosporangium sp. 4NS15]                              | GCF_013280595.1 |
| WP_173195298.1 | GT4+APATPase+TPR+TPR*→                                                             | GT4+APATPase+TPR+TPR        | 1427 | HR085_RS00175 | Deltaproteobacteria | Geobacter sp. SVR                 | tetratricopeptide repeat protein [Geobacter sp. SVR]                           | GCF_016865365.1 |
| WP_173395462.1 | DJ-1_PfpI→ LexA→?→   <-?<-?<-?<-cNMP_binding+HTH_Crp_2  GT4*→   <-HTH+APATPase+TPR | GT4                         | 438  | GWI34_RS19435 | Actinobacteria      | Actinomadura sp. DSM 109109       | glycosyltransferase [Actinomadura sp. DSM 109109]                              | -               |
| WP_173526832.1 | GT4+APATPase+TPR+TPR*→                                                             | GT4+APATPase+TPR+TPR        | 1208 | HII36_RS31010 | Actinobacteria      | Nonomurea sp. NN258               | tetratricopeptide repeat protein [Nonomurea sp. NN258]                         | GCF_013283785.1 |
| WP_173991751.1 | PfkB→?→?→?→ GT4+B12-binding+RADICAL-SAM*→                                          | GT4+B12-binding+RADICAL-SAM | 1387 | G6M20_RS23615 | Alphaproteobacteria | Agrobacterium salinitolerans      | cobalamin B12-binding domain-containing protein [Agrobacterium salinitolerans] | GCF_013317635.1 |
| WP_174156125.1 | HTH+MPTase→?→   <-?  ?→?→ NACHT+GT4*→                                              | NACHT+GT4                   | 1640 | G6L88_RS21970 | Alphaproteobacteria | Rhizobium skienewicense           | glycosyltransferase [Rhizobium skienewicense]                                  | GCF_013320815.1 |
| WP_174295717.1 | GT4*→                                                                              | GT4                         | 613  | G7A66_RS11060 | Alphaproteobacteria | Altererythrobaacter sp. SALINAS58 | glycosyltransferase [Altererythrobaacter sp. SALINAS58]                        | GCF_013336795.1 |
| WP_174397973.1 | GT4*→                                                                              | GT4                         | 602  | FEG63_RS11180 | Actinobacteria      | Mycolicibacterium sphagni         | glycosyltransferase [Mycolicibacterium sphagni]                                | GCF_013337765.1 |
| WP_174527417.1 | STAND→?→ DUF4913→   <-?  ?→ GT4*→?→?→?→ NUDIX→   <-?<-ABC_tran                     | GT4                         | 438  | HUW36_RS07305 | Actinobacteria      | Micromonospora maritima           | glycosyltransferase [Micromonospora maritima]                                  | GCF_902825405.1 |
| WP_175264897.1 | NACHT+MNS→ MNS+GT4*→   <-?<-CASPASE                                                | MNS+GT4                     | 752  | HRW23_RS35520 | Actinobacteria      | Streptomyces lunaelactis          | glycosyltransferase [Streptomyces lunaelactis]                                 | GCF_013357925.1 |
| WP_176052200.1 | STAND+GT4*→?→   <-Cluster466_2clades<-?<-?<-?  DNA_methylase→   <-Vsr              | STAND+GT4                   | 1090 | HWY02_RS01425 | Deltaproteobacteria | Paraburkholderia caribensis       | glycosyltransferase [Paraburkholderia caribensis]                              | GCF_902833585.1 |

| acc            | operon                                           | architecture                | len  | gen.name          | taxend              | species                    | define                                                     | gca             |
|----------------|--------------------------------------------------|-----------------------------|------|-------------------|---------------------|----------------------------|------------------------------------------------------------|-----------------|
| WP_176182010.1 | MNS+GT4*→   <-?<-?<-AA_permease                  | MNS+GT4                     | 1151 | HUT19_RS21388     | Actinobacteria      | Streptomyces sp. NA02950   | glycosyltransferase<br>[Streptomyces sp. NA02950]          | GCF_013364155.1 |
| WP_176404534.1 | <-cNMP_binding+HTH_Crp_2  GT4*→                  | GT4                         | 427  | HUX53_RS18900     | Actinobacteria      | Actinomadura sp. BRA 177   | glycosyltransferase<br>[Actinomadura sp. BRA 177]          | GCF_013372625.1 |
| WP_176437046.1 | <-ABC_tran<-?  ?→   <-?<-PSE<-?  GT4+TPR+TPR*→   | GT4+TPR+TPR                 | 1428 | HUW62_RS36513     | Betaproteobacteria  | Myxococcus sp. AM011       | tetratricopeptide repeat protein<br>[Myxococcus sp. AM011] | GCF_013372595.1 |
| WP_176439087.1 | HTH_Tnp_1→ TnpB_IS66→?→ NACHT+GT4*→              | NACHT+GT4                   | 1580 | CHB75_RS08020     | Alphaproteobacteria | Puniceibacterium sediminis | glycosyltransferase<br>[Puniceibacterium sediminis]        | GCF_900188035.1 |
| WP_176652673.1 | GT4+NACHT*→ HTH_Tnp_1→ TnpB_IS66→                | GT4+NACHT                   | 1759 | FHT31_RS13553     | Betaproteobacteria  | Rugamonas sp. SG757        | glycosyltransferase<br>[Rugamonas sp. SG757]               | GCF_013375995.1 |
| WP_176735010.1 | <-TPR+Caspase  GT4*→                             | GT4                         | 546  | GA0070563_RS27500 | Actinobacteria      | Micromonospora carbonacea  | glycosyltransferase<br>[Micromonospora carbonacea]         | GCF_900091535.1 |
| WP_177014872.1 | STAND+GT4*→                                      | STAND+GT4                   | 1080 | HX791_RS25783     | Gammaproteobacteria | Pseudomonas costantinii    | glycosyltransferase<br>[Pseudomonas costantinii]           | GCF_013386225.1 |
| WP_177060102.1 | <-MFS  ?→   <-?<-?  ?→   <-?  APATPase+GT4*→     | APATPase+GT4                | 1336 | HX876_RS19433     | Gammaproteobacteria | Pseudomonas gingeri        | glycosyltransferase<br>[Pseudomonas gingeri]               | GCF_013385575.1 |
| WP_177062848.1 | GT4+B12-binding+RADICAL-SAM*→                    | GT4+B12-binding+RADICAL-SAM | 1404 | HX876_RS14360     | Gammaproteobacteria | Pseudomonas gingeri        | radical SAM protein<br>[Pseudomonas gingeri]               | GCF_013385575.1 |
| WP_177065618.1 | <-MFS  ?→   <-?<-?  ?→   <-?  APATPase+TPR+GT4*→ | APATPase+TPR+GT4            | 1336 | HX861_RS09040     | Gammaproteobacteria | Pseudomonas gingeri        | glycosyltransferase<br>[Pseudomonas gingeri]               | GCF_013385925.1 |
| WP_177072953.1 | <-MFS  ?→   <-?<-?  ?→   <-?  APATPase+TPR+GT4*→ | APATPase+TPR+GT4            | 1336 | HX800_RS13020     | Gammaproteobacteria | Pseudomonas gingeri        | glycosyltransferase<br>[Pseudomonas gingeri]               | GCF_013386965.1 |
| WP_177108140.1 | <-MFS  ?→   <-?<-?  ?→   <-?  APATPase+GT4*→     | APATPase+GT4                | 1299 | HX867_RS22143     | Gammaproteobacteria | Pseudomonas gingeri        | glycosyltransferase<br>[Pseudomonas gingeri]               | GCF_013386235.1 |
| WP_177126920.1 | <-MFS  ?→   <-?<-?  ?→   <-?  APATPase+TPR+GT4*→ | APATPase+TPR+GT4            | 1336 | HX831_RS01003     | Gammaproteobacteria | Pseudomonas gingeri        | glycosyltransferase<br>[Pseudomonas gingeri]               | GCF_013386815.1 |

| acc            | operon                                                    | architecture                | len  | gen.name      | taxend              | species                          | defline                                                                            | gca             |
|----------------|-----------------------------------------------------------|-----------------------------|------|---------------|---------------------|----------------------------------|------------------------------------------------------------------------------------|-----------------|
| WP_177129208.1 | <-MFS  ?→    <-?<-?  ?→    <-?  APATPase+TPR+GT4*→        | APATPase+TPR+GT4            | 1299 | HX808_RS1734  | Gamma               | Pseudomonas<br>gingeri           | glycosyltrans-<br>ferase<br>[Pseudomonas<br>gingeri]                               | GCF_013385905.1 |
| WP_177204219.1 | <-Sigma  ?→    <-?<-?<-?  GT4+B12-binding*→               | GT4+B12-binding             | 1122 | BMY84_RS26750 | Alphaproteobacteria | Sphingobium sp.<br>AP50          | glycosyltrans-<br>ferase<br>[Sphingobium sp.<br>AP50]                              | GCF_900109095.1 |
| WP_178066132.1 | <-TPR+Caspase  GT4*→                                      | GT4                         | 546  | HDA31_RS04955 | Actinobacteria      | Micromonospora<br>carbonacea     | glycosyltrans-<br>ferase<br>[Micromonospora<br>carbonacea]                         | GCF_013389765.1 |
| WP_178963184.1 | GT4+B12-binding+RADICAL-SAM*→                             | GT4+B12-binding+RADICAL-SAM | 1404 | HX895_RS03680 | Gamma               | Pseudomonas<br>gingeri           | radical SAM<br>protein<br>[Pseudomonas<br>gingeri]                                 | GCF_013387125.1 |
| WP_178963665.1 | <-MFS  ?→    <-?<-?  ?→    <-?  APATPase+GT4*→            | APATPase+GT4                | 1336 | HX895_RS14805 | Gamma               | Pseudomonas<br>gingeri           | glycosyltrans-<br>ferase<br>[Pseudomonas<br>gingeri]                               | GCF_013387125.1 |
| WP_179766782.1 | TRPR-HTH+PBPI→?→ SIG+Lipase_GDSL_2→?→ Zeta_toxin→?→ GT4*→ | GT4                         | 461  | HNR12_RS07370 | Actinobacteria      | Streptomonospora<br>nanhaiensis  | glycosyltrans-<br>ferase<br>[Strep-<br>tomonospora<br>nanhaiensis]                 | GCF_013410565.1 |
| WP_179767386.1 | GT4*→?→    <-?<-?<-tRNA-synt_1b+S4                        | GT4                         | 489  | HNR12_RS10915 | Actinobacteria      | Streptomonospora<br>nanhaiensis  | glycosyltrans-<br>ferase<br>[Strep-<br>tomonospora<br>nanhaiensis]                 | GCF_013410565.1 |
| WP_179826407.1 | <-APATPase+TPR  ?→ GT4*→                                  | GT4                         | 524  | HNR10_RS21750 | Actinobacteria      | Nocardiopsis<br>aegyptia         | hypothetical<br>protein<br>[Nocardiopsis<br>aegyptia]                              | GCF_013410755.1 |
| WP_179835700.1 | GT4*→    <-?<-?<-cNMP_binding+HTH_Crp_2                   | GT4                         | 388  | BJ999_RS25940 | Actinobacteria      | Actinomadura<br>citrea           | glycosyltrans-<br>ferase<br>[Actinomadura<br>citrea]                               | GCF_014648455.1 |
| WP_180357038.1 | HTH→?→?→    <-?<-?  Caspase+NACHT+GT4*→                   | Caspase+NACHT+GT4           | 1165 | BX283_RS03940 | Actinobacteria      | Streptomyces sp.<br>TLI_146      | caspase family<br>protein<br>[Streptomyces sp.<br>TLI_146]                         | GCF_002846415.1 |
| WP_180930380.1 | MNS+GT4*→                                                 | MNS+GT4                     | 1268 | E0L36_RS19290 | Actinobacteria      | Streptomyces sp.<br>AJS327       | glycosyltrans-<br>ferase<br>[Streptomyces sp.<br>AJS327]                           | GCF_013450295.1 |
| WP_181043331.1 | MFS→?→?→ WXG→?→ GT4*→?→ GT4→                              | GT4                         | 391  | CLV40_RS37790 | Actinobacteria      | Actinokineospora<br>auranticolor | glycosyltrans-<br>ferase family 4<br>protein<br>[Actinokineospora<br>auranticolor] | GCF_002934265.1 |

| acc            | operon                                    | architecture | len | gen.name      | taxend         | species               | define                                         | gca             |
|----------------|-------------------------------------------|--------------|-----|---------------|----------------|-----------------------|------------------------------------------------|-----------------|
| WP_181245803.1 | GT4*→ APATPase+TPR→    <-?<-TRPR-HTH+PBPI | GT4          | 401 | B0I28_RS15405 | Actinobacteria | Glycomyces artemisiae | glycosyltransferase<br>[Glycomyces artemisiae] | GCF_003002955.1 |

Domain architectures of eukaryotic GT4s with a special emphasis on the LSE in Acropora

| acc            | architecture  | len  | gen.name     | tax                                     | species             | GCA             |
|----------------|---------------|------|--------------|-----------------------------------------|---------------------|-----------------|
| XP_015747238.1 | GT4           | 461  | LOC107327009 | Eukaryota>Opisthokonta>Metazoa>Cnidaria | Acropora digitifera | GCF_000222465.1 |
| XP_015747313.1 | GT4+NACHT     | 648  | LOC107327071 | Eukaryota>Opisthokonta>Metazoa>Cnidaria | Acropora digitifera | GCF_000222465.1 |
| XP_015747371.1 | GT4           | 492  | LOC107327132 | Eukaryota>Opisthokonta>Metazoa>Cnidaria | Acropora digitifera | GCF_000222465.1 |
| XP_015747395.1 | GT4+NACHT     | 628  | LOC107327154 | Eukaryota>Opisthokonta>Metazoa>Cnidaria | Acropora digitifera | GCF_000222465.1 |
| XP_015747754.1 | GT4           | 430  | LOC107327516 | Eukaryota>Opisthokonta>Metazoa>Cnidaria | Acropora digitifera | GCF_000222465.1 |
| XP_015747753.1 | GT4           | 437  | LOC107327516 | Eukaryota>Opisthokonta>Metazoa>Cnidaria | Acropora digitifera | GCF_000222465.1 |
| XP_015747750.1 | GT4           | 437  | LOC107327516 | Eukaryota>Opisthokonta>Metazoa>Cnidaria | Acropora digitifera | GCF_000222465.1 |
| XP_015747752.1 | GT4           | 437  | LOC107327516 | Eukaryota>Opisthokonta>Metazoa>Cnidaria | Acropora digitifera | GCF_000222465.1 |
| XP_015747751.1 | GT4           | 437  | LOC107327516 | Eukaryota>Opisthokonta>Metazoa>Cnidaria | Acropora digitifera | GCF_000222465.1 |
| XP_015747749.1 | GT4           | 451  | LOC107327516 | Eukaryota>Opisthokonta>Metazoa>Cnidaria | Acropora digitifera | GCF_000222465.1 |
| XP_015748052.1 | GT4           | 595  | LOC107327825 | Eukaryota>Opisthokonta>Metazoa>Cnidaria | Acropora digitifera | GCF_000222465.1 |
| XP_015748207.1 | GT4           | 424  | LOC107328002 | Eukaryota>Opisthokonta>Metazoa>Cnidaria | Acropora digitifera | GCF_000222465.1 |
| XP_015748206.1 | GT4           | 424  | LOC107328002 | Eukaryota>Opisthokonta>Metazoa>Cnidaria | Acropora digitifera | GCF_000222465.1 |
| XP_015748205.1 | GT4           | 429  | LOC107328002 | Eukaryota>Opisthokonta>Metazoa>Cnidaria | Acropora digitifera | GCF_000222465.1 |
| XP_015748202.1 | GT4           | 430  | LOC107328002 | Eukaryota>Opisthokonta>Metazoa>Cnidaria | Acropora digitifera | GCF_000222465.1 |
| XP_015748203.1 | GT4           | 430  | LOC107328002 | Eukaryota>Opisthokonta>Metazoa>Cnidaria | Acropora digitifera | GCF_000222465.1 |
| XP_015748201.1 | GT4           | 437  | LOC107328002 | Eukaryota>Opisthokonta>Metazoa>Cnidaria | Acropora digitifera | GCF_000222465.1 |
| XP_015748200.1 | GT4           | 442  | LOC107328002 | Eukaryota>Opisthokonta>Metazoa>Cnidaria | Acropora digitifera | GCF_000222465.1 |
| XP_015748274.1 | GT4           | 440  | LOC107328074 | Eukaryota>Opisthokonta>Metazoa>Cnidaria | Acropora digitifera | GCF_000222465.1 |
| XP_015748402.1 | ZU5+ZU5+GT4   | 1030 | LOC107328179 | Eukaryota>Opisthokonta>Metazoa>Cnidaria | Acropora digitifera | GCF_000222465.1 |
| XP_015748412.1 | GT4+NACHT     | 551  | LOC107328186 | Eukaryota>Opisthokonta>Metazoa>Cnidaria | Acropora digitifera | GCF_000222465.1 |
| XP_015748513.1 | SIG+GT4+DEATH | 524  | LOC107328287 | Eukaryota>Opisthokonta>Metazoa>Cnidaria | Acropora digitifera | GCF_000222465.1 |
| XP_015748512.1 | SIG+GT4+DEATH | 526  | LOC107328287 | Eukaryota>Opisthokonta>Metazoa>Cnidaria | Acropora digitifera | GCF_000222465.1 |
| XP_015748877.1 | GT4           | 416  | LOC107328661 | Eukaryota>Opisthokonta>Metazoa>Cnidaria | Acropora digitifera | GCF_000222465.1 |
| XP_015748878.1 | GT4+NACHT     | 578  | LOC107328662 | Eukaryota>Opisthokonta>Metazoa>Cnidaria | Acropora digitifera | GCF_000222465.1 |
| XP_015748920.1 | GT4           | 389  | LOC107328707 | Eukaryota>Opisthokonta>Metazoa>Cnidaria | Acropora digitifera | GCF_000222465.1 |
| XP_015748918.1 | GT4           | 391  | LOC107328707 | Eukaryota>Opisthokonta>Metazoa>Cnidaria | Acropora digitifera | GCF_000222465.1 |
| XP_015748919.1 | GT4           | 391  | LOC107328707 | Eukaryota>Opisthokonta>Metazoa>Cnidaria | Acropora digitifera | GCF_000222465.1 |
| XP_015749378.1 | GT4           | 610  | LOC107329155 | Eukaryota>Opisthokonta>Metazoa>Cnidaria | Acropora digitifera | GCF_000222465.1 |
| XP_015749585.1 | GT4           | 400  | LOC107329409 | Eukaryota>Opisthokonta>Metazoa>Cnidaria | Acropora digitifera | GCF_000222465.1 |
| XP_015749584.1 | GT4+TF-AF0608 | 480  | LOC107329409 | Eukaryota>Opisthokonta>Metazoa>Cnidaria | Acropora digitifera | GCF_000222465.1 |
| XP_015749790.1 | GT4           | 470  | LOC107329632 | Eukaryota>Opisthokonta>Metazoa>Cnidaria | Acropora digitifera | GCF_000222465.1 |
| XP_015749876.1 | GT4+NACHT     | 583  | LOC107329721 | Eukaryota>Opisthokonta>Metazoa>Cnidaria | Acropora digitifera | GCF_000222465.1 |
| XP_015750005.1 | GT4           | 637  | LOC107329865 | Eukaryota>Opisthokonta>Metazoa>Cnidaria | Acropora digitifera | GCF_000222465.1 |
| XP_015750060.1 | GT4           | 418  | LOC107329915 | Eukaryota>Opisthokonta>Metazoa>Cnidaria | Acropora digitifera | GCF_000222465.1 |
| XP_015750058.1 | GT4           | 483  | LOC107329915 | Eukaryota>Opisthokonta>Metazoa>Cnidaria | Acropora digitifera | GCF_000222465.1 |
| XP_015750090.1 | GT4           | 464  | LOC107329946 | Eukaryota>Opisthokonta>Metazoa>Cnidaria | Acropora digitifera | GCF_000222465.1 |
| XP_015750089.1 | GT4           | 477  | LOC107329946 | Eukaryota>Opisthokonta>Metazoa>Cnidaria | Acropora digitifera | GCF_000222465.1 |
| XP_015750088.1 | GT4           | 510  | LOC107329946 | Eukaryota>Opisthokonta>Metazoa>Cnidaria | Acropora digitifera | GCF_000222465.1 |
| XP_015750086.1 | GT4           | 513  | LOC107329946 | Eukaryota>Opisthokonta>Metazoa>Cnidaria | Acropora digitifera | GCF_000222465.1 |
| XP_015750087.1 | GT4           | 513  | LOC107329946 | Eukaryota>Opisthokonta>Metazoa>Cnidaria | Acropora digitifera | GCF_000222465.1 |
| XP_015750637.1 | GT4           | 341  | LOC107330559 | Eukaryota>Opisthokonta>Metazoa>Cnidaria | Acropora digitifera | GCF_000222465.1 |
| XP_015753085.1 | SIG+GT4       | 635  | LOC107332846 | Eukaryota>Opisthokonta>Metazoa>Cnidaria | Acropora digitifera | GCF_000222465.1 |









| acc            | architecture            | len  | gen.name        | tax                                     | species                                                  | GCA             |
|----------------|-------------------------|------|-----------------|-----------------------------------------|----------------------------------------------------------|-----------------|
| XP_015748415.1 | GT4+NACHT               | 785  | LOC107328189    | Eukaryota>Opisthokonta>Metazoa>Cnidaria | Acropora digitifera                                      | GCF_000222465.1 |
| XP_015749493.1 | GT4+NACHT               | 1051 | LOC107329298    | Eukaryota>Opisthokonta>Metazoa>Cnidaria | Acropora digitifera                                      | GCF_000222465.1 |
| XP_015756823.1 | GT4+NACHT               | 1117 | LOC107336267    | Eukaryota>Opisthokonta>Metazoa>Cnidaria | Acropora digitifera                                      | GCF_000222465.1 |
| XP_015757684.1 | GT4+NACHT               | 1102 | LOC107337083    | Eukaryota>Opisthokonta>Metazoa>Cnidaria | Acropora digitifera                                      | GCF_000222465.1 |
| XP_015757683.1 | GT4+NACHT               | 1214 | LOC107337083    | Eukaryota>Opisthokonta>Metazoa>Cnidaria | Acropora digitifera                                      | GCF_000222465.1 |
| XP_015759265.1 | GT4+NACHT               | 1127 | LOC107338542    | Eukaryota>Opisthokonta>Metazoa>Cnidaria | Acropora digitifera                                      | GCF_000222465.1 |
| XP_015760037.1 | GT4+NACHT               | 897  | LOC107339286    | Eukaryota>Opisthokonta>Metazoa>Cnidaria | Acropora digitifera                                      | GCF_000222465.1 |
| XP_015764733.1 | GT4+NACHT               | 1250 | LOC107343665    | Eukaryota>Opisthokonta>Metazoa>Cnidaria | Acropora digitifera                                      | GCF_000222465.1 |
| XP_015764740.1 | GT4+NACHT               | 1273 | LOC107343669    | Eukaryota>Opisthokonta>Metazoa>Cnidaria | Acropora digitifera                                      | GCF_000222465.1 |
| XP_015766114.1 | GT4+NACHT               | 883  | LOC107344942    | Eukaryota>Opisthokonta>Metazoa>Cnidaria | Acropora digitifera                                      | GCF_000222465.1 |
| XP_015767800.1 | GT4+NACHT               | 1362 | LOC107346514    | Eukaryota>Opisthokonta>Metazoa>Cnidaria | Acropora digitifera                                      | GCF_000222465.1 |
| XP_015769559.1 | GT4+NACHT               | 1073 | LOC107348070    | Eukaryota>Opisthokonta>Metazoa>Cnidaria | Acropora digitifera                                      | GCF_000222465.1 |
| XP_015771075.1 | GT4+NACHT               | 1131 | LOC107349444    | Eukaryota>Opisthokonta>Metazoa>Cnidaria | Acropora digitifera                                      | GCF_000222465.1 |
| XP_015771449.1 | GT4+NACHT               | 1095 | LOC107349777    | Eukaryota>Opisthokonta>Metazoa>Cnidaria | Acropora digitifera                                      | GCF_000222465.1 |
| XP_015774737.1 | GT4+NACHT               | 1214 | LOC107352931    | Eukaryota>Opisthokonta>Metazoa>Cnidaria | Acropora digitifera                                      | GCF_000222465.1 |
| XP_015774735.1 | GT4+NACHT               | 1240 | LOC107352931    | Eukaryota>Opisthokonta>Metazoa>Cnidaria | Acropora digitifera                                      | GCF_000222465.1 |
| XP_015774736.1 | GT4+NACHT               | 1240 | LOC107352931    | Eukaryota>Opisthokonta>Metazoa>Cnidaria | Acropora digitifera                                      | GCF_000222465.1 |
| XP_015775665.1 | GT4+NACHT               | 1107 | LOC107353792    | Eukaryota>Opisthokonta>Metazoa>Cnidaria | Acropora digitifera                                      | GCF_000222465.1 |
| XP_015775664.1 | GT4+NACHT               | 1107 | LOC107353792    | Eukaryota>Opisthokonta>Metazoa>Cnidaria | Acropora digitifera                                      | GCF_000222465.1 |
| XP_015777175.1 | GT4+NACHT               | 1097 | LOC107355160    | Eukaryota>Opisthokonta>Metazoa>Cnidaria | Acropora digitifera                                      | GCF_000222465.1 |
| XP_015777174.1 | GT4+NACHT               | 1160 | LOC107355160    | Eukaryota>Opisthokonta>Metazoa>Cnidaria | Acropora digitifera                                      | GCF_000222465.1 |
| XP_015777173.1 | GT4+NACHT               | 1185 | LOC107355160    | Eukaryota>Opisthokonta>Metazoa>Cnidaria | Acropora digitifera                                      | GCF_000222465.1 |
| XP_015777171.1 | GT4+NACHT               | 1210 | LOC107355160    | Eukaryota>Opisthokonta>Metazoa>Cnidaria | Acropora digitifera                                      | GCF_000222465.1 |
| XP_015777168.1 | GT4+NACHT               | 1214 | LOC107355160    | Eukaryota>Opisthokonta>Metazoa>Cnidaria | Acropora digitifera                                      | GCF_000222465.1 |
| XP_015777169.1 | GT4+NACHT               | 1214 | LOC107355160    | Eukaryota>Opisthokonta>Metazoa>Cnidaria | Acropora digitifera                                      | GCF_000222465.1 |
| XP_015777170.1 | GT4+NACHT               | 1214 | LOC107355160    | Eukaryota>Opisthokonta>Metazoa>Cnidaria | Acropora digitifera                                      | GCF_000222465.1 |
| XP_015777167.1 | GT4+NACHT               | 1229 | LOC107355160    | Eukaryota>Opisthokonta>Metazoa>Cnidaria | Acropora digitifera                                      | GCF_000222465.1 |
| XP_015777166.1 | GT4+NACHT               | 1234 | LOC107355160    | Eukaryota>Opisthokonta>Metazoa>Cnidaria | Acropora digitifera                                      | GCF_000222465.1 |
| XP_015777164.1 | GT4+NACHT               | 1237 | LOC107355160    | Eukaryota>Opisthokonta>Metazoa>Cnidaria | Acropora digitifera                                      | GCF_000222465.1 |
| XP_015777165.1 | GT4+NACHT               | 1237 | LOC107355160    | Eukaryota>Opisthokonta>Metazoa>Cnidaria | Acropora digitifera                                      | GCF_000222465.1 |
| XP_015778512.1 | GT4+NACHT               | 1054 | LOC107356410    | Eukaryota>Opisthokonta>Metazoa>Cnidaria | Acropora digitifera                                      | GCF_000222465.1 |
| XP_015779196.1 | GT4+NACHT               | 1094 | LOC107357068    | Eukaryota>Opisthokonta>Metazoa>Cnidaria | Acropora digitifera                                      | GCF_000222465.1 |
| XP_015779200.1 | GT4+NACHT               | 980  | LOC107357071    | Eukaryota>Opisthokonta>Metazoa>Cnidaria | Acropora digitifera                                      | GCF_000222465.1 |
| XP_015779450.1 | GT4+NACHT               | 1180 | LOC107357325    | Eukaryota>Opisthokonta>Metazoa>Cnidaria | Acropora digitifera                                      | GCF_000222465.1 |
| XP_015779456.1 | GT4+NACHT               | 723  | LOC107357328    | Eukaryota>Opisthokonta>Metazoa>Cnidaria | Acropora digitifera                                      | GCF_000222465.1 |
| XP_015779455.1 | GT4+NACHT               | 748  | LOC107357328    | Eukaryota>Opisthokonta>Metazoa>Cnidaria | Acropora digitifera                                      | GCF_000222465.1 |
| XP_015779454.1 | GT4+NACHT               | 750  | LOC107357328    | Eukaryota>Opisthokonta>Metazoa>Cnidaria | Acropora digitifera                                      | GCF_000222465.1 |
| XP_015779453.1 | GT4+NACHT               | 775  | LOC107357328    | Eukaryota>Opisthokonta>Metazoa>Cnidaria | Acropora digitifera                                      | GCF_000222465.1 |
| XP_015779585.1 | GT4+NACHT               | 1318 | LOC107357460    | Eukaryota>Opisthokonta>Metazoa>Cnidaria | Acropora digitifera                                      | GCF_000222465.1 |
| KHO50967.1     | GT4                     | 400  | QT05_C0047G0016 | Archaea                                 | archaeon GW2011_AR13                                     | GCA_000805965.1 |
| EGD71903.1     | GT4                     | 378  | CSMARM5_0008    | Archaea>DPANN group                     | Candidatus Parvarchaeum acidophilus<br>ARMAN-5_5-way FS' | GCA_000192615.1 |
| XP_015768804.1 | SIG+GT4+DEATH+sGTP+sGTP | 2069 | LOC107347416    | Eukaryota>Opisthokonta>Metazoa>Cnidaria | Acropora digitifera                                      | GCF_000222465.1 |
| XP_015768802.1 | SIG+GT4+DEATH+sGTP+sGTP | 2089 | LOC107347416    | Eukaryota>Opisthokonta>Metazoa>Cnidaria | Acropora digitifera                                      | GCF_000222465.1 |
| XP_015768801.1 | GT4+DEATH+sGTP+sGTP     | 2091 | LOC107347416    | Eukaryota>Opisthokonta>Metazoa>Cnidaria | Acropora digitifera                                      | GCF_000222465.1 |
| XP_015768800.1 | GT4+DEATH+sGTP+sGTP     | 2092 | LOC107347416    | Eukaryota>Opisthokonta>Metazoa>Cnidaria | Acropora digitifera                                      | GCF_000222465.1 |
| XP_015768799.1 | GT4+DEATH+sGTP+sGTP     | 2092 | LOC107347416    | Eukaryota>Opisthokonta>Metazoa>Cnidaria | Acropora digitifera                                      | GCF_000222465.1 |
| XP_015768797.1 | SIG+GT4+DEATH+sGTP+sGTP | 2094 | LOC107347416    | Eukaryota>Opisthokonta>Metazoa>Cnidaria | Acropora digitifera                                      | GCF_000222465.1 |
| XP_015768795.1 | GT4+DEATH+sGTP+sGTP     | 2094 | LOC107347416    | Eukaryota>Opisthokonta>Metazoa>Cnidaria | Acropora digitifera                                      | GCF_000222465.1 |
| XP_015768798.1 | SIG+GT4+DEATH+sGTP+sGTP | 2094 | LOC107347416    | Eukaryota>Opisthokonta>Metazoa>Cnidaria | Acropora digitifera                                      | GCF_000222465.1 |
| XP_015768796.1 | SIG+GT4+DEATH+sGTP+sGTP | 2094 | LOC107347416    | Eukaryota>Opisthokonta>Metazoa>Cnidaria | Acropora digitifera                                      | GCF_000222465.1 |
| XP_015768794.1 | GT4+DEATH+sGTP+sGTP     | 2094 | LOC107347416    | Eukaryota>Opisthokonta>Metazoa>Cnidaria | Acropora digitifera                                      | GCF_000222465.1 |



| acc            | architecture            | len  | gen.name             | tax                                     | species                | GCA             |
|----------------|-------------------------|------|----------------------|-----------------------------------------|------------------------|-----------------|
| XP_015768844.1 | GT4+sGTP+sGTP           | 1928 | LOC107347432         | Eukaryota>Opisthokonta>Metazoa>Cnidaria | Acropora digitifera    | GCF_000222465.1 |
| XP_015768842.1 | SIG+GT4+sGTP+sGTP       | 1929 | LOC107347432         | Eukaryota>Opisthokonta>Metazoa>Cnidaria | Acropora digitifera    | GCF_000222465.1 |
| XP_015768841.1 | SIG+GT4+sGTP+sGTP       | 1930 | LOC107347432         | Eukaryota>Opisthokonta>Metazoa>Cnidaria | Acropora digitifera    | GCF_000222465.1 |
| XP_015768840.1 | SIG+GT4+sGTP+sGTP       | 1951 | LOC107347432         | Eukaryota>Opisthokonta>Metazoa>Cnidaria | Acropora digitifera    | GCF_000222465.1 |
| XP_015768839.1 | SIG+GT4+sGTP+sGTP       | 1953 | LOC107347432         | Eukaryota>Opisthokonta>Metazoa>Cnidaria | Acropora digitifera    | GCF_000222465.1 |
| XP_015767989.1 | GT4+NACHT               | 1796 | LOC107346689         | Eukaryota>Opisthokonta>Metazoa>Cnidaria | Acropora digitifera    | GCF_000222465.1 |
| XP_015767988.1 | SIG+GT4+NACHT           | 1806 | LOC107346689         | Eukaryota>Opisthokonta>Metazoa>Cnidaria | Acropora digitifera    | GCF_000222465.1 |
| XP_015776065.1 | GT4+NACHT               | 1674 | LOC107354137         | Eukaryota>Opisthokonta>Metazoa>Cnidaria | Acropora digitifera    | GCF_000222465.1 |
| XP_015776064.1 | GT4+NACHT               | 1675 | LOC107354137         | Eukaryota>Opisthokonta>Metazoa>Cnidaria | Acropora digitifera    | GCF_000222465.1 |
| XP_015776063.1 | SIG+GT4+NACHT           | 1801 | LOC107354137         | Eukaryota>Opisthokonta>Metazoa>Cnidaria | Acropora digitifera    | GCF_000222465.1 |
| XP_015776062.1 | SIG+GT4+NACHT           | 1828 | LOC107354137         | Eukaryota>Opisthokonta>Metazoa>Cnidaria | Acropora digitifera    | GCF_000222465.1 |
| XP_015776061.1 | SIG+GT4+NACHT           | 1838 | LOC107354137         | Eukaryota>Opisthokonta>Metazoa>Cnidaria | Acropora digitifera    | GCF_000222465.1 |
| XP_015776060.1 | SIG+GT4+NACHT           | 1877 | LOC107354137         | Eukaryota>Opisthokonta>Metazoa>Cnidaria | Acropora digitifera    | GCF_000222465.1 |
| XP_015776059.1 | SIG+GT4+NACHT           | 1885 | LOC107354137         | Eukaryota>Opisthokonta>Metazoa>Cnidaria | Acropora digitifera    | GCF_000222465.1 |
| XP_015776058.1 | SIG+GT4+NACHT           | 1914 | LOC107354137         | Eukaryota>Opisthokonta>Metazoa>Cnidaria | Acropora digitifera    | GCF_000222465.1 |
| XP_015776057.1 | SIG+GT4+NACHT           | 1938 | LOC107354137         | Eukaryota>Opisthokonta>Metazoa>Cnidaria | Acropora digitifera    | GCF_000222465.1 |
| XP_015776056.1 | SIG+GT4+NACHT           | 1947 | LOC107354137         | Eukaryota>Opisthokonta>Metazoa>Cnidaria | Acropora digitifera    | GCF_000222465.1 |
| XP_015776055.1 | SIG+GT4+NACHT           | 1951 | LOC107354137         | Eukaryota>Opisthokonta>Metazoa>Cnidaria | Acropora digitifera    | GCF_000222465.1 |
| XP_015776054.1 | SIG+GT4+NACHT           | 1951 | LOC107354137         | Eukaryota>Opisthokonta>Metazoa>Cnidaria | Acropora digitifera    | GCF_000222465.1 |
| XP_015747144.1 | GT4+NACHT               | 1735 | LOC107326906         | Eukaryota>Opisthokonta>Metazoa>Cnidaria | Acropora digitifera    | GCF_000222465.1 |
| XP_015764064.1 | GT4+NACHT               | 1703 | LOC107343050         | Eukaryota>Opisthokonta>Metazoa>Cnidaria | Acropora digitifera    | GCF_000222465.1 |
| XP_015764063.1 | GT4+NACHT               | 1703 | LOC107343050         | Eukaryota>Opisthokonta>Metazoa>Cnidaria | Acropora digitifera    | GCF_000222465.1 |
| XP_015764065.1 | GT4+NACHT               | 1703 | LOC107343050         | Eukaryota>Opisthokonta>Metazoa>Cnidaria | Acropora digitifera    | GCF_000222465.1 |
| XP_015764062.1 | GT4+NACHT               | 1703 | LOC107343050         | Eukaryota>Opisthokonta>Metazoa>Cnidaria | Acropora digitifera    | GCF_000222465.1 |
| XP_015764061.1 | GT4+NACHT               | 1715 | LOC107343050         | Eukaryota>Opisthokonta>Metazoa>Cnidaria | Acropora digitifera    | GCF_000222465.1 |
| XP_015764057.1 | GT4+NACHT               | 1719 | LOC107343050         | Eukaryota>Opisthokonta>Metazoa>Cnidaria | Acropora digitifera    | GCF_000222465.1 |
| XP_015764060.1 | GT4+NACHT               | 1719 | LOC107343050         | Eukaryota>Opisthokonta>Metazoa>Cnidaria | Acropora digitifera    | GCF_000222465.1 |
| XP_015764058.1 | GT4+NACHT               | 1719 | LOC107343050         | Eukaryota>Opisthokonta>Metazoa>Cnidaria | Acropora digitifera    | GCF_000222465.1 |
| XP_015764059.1 | GT4+NACHT               | 1719 | LOC107343050         | Eukaryota>Opisthokonta>Metazoa>Cnidaria | Acropora digitifera    | GCF_000222465.1 |
| XP_015777734.1 | GT4+NACHT               | 1739 | LOC107355669         | Eukaryota>Opisthokonta>Metazoa>Cnidaria | Acropora digitifera    | GCF_000222465.1 |
| XP_015778874.1 | SIG+GT4+VWA+SERAprtease | 1218 | LOC107356762         | Eukaryota>Opisthokonta>Metazoa>Cnidaria | Acropora digitifera    | GCF_000222465.1 |
| XP_015778871.1 | SIG+GT4+VWA+SERAprtease | 1221 | LOC107356762         | Eukaryota>Opisthokonta>Metazoa>Cnidaria | Acropora digitifera    | GCF_000222465.1 |
| XP_015778870.1 | SIG+GT4+VWA+SERAprtease | 1221 | LOC107356762         | Eukaryota>Opisthokonta>Metazoa>Cnidaria | Acropora digitifera    | GCF_000222465.1 |
| XP_015778873.1 | SIG+GT4+VWA+SERAprtease | 1221 | LOC107356762         | Eukaryota>Opisthokonta>Metazoa>Cnidaria | Acropora digitifera    | GCF_000222465.1 |
| XP_015778868.1 | SIG+GT4+VWA+SERAprtease | 1221 | LOC107356762         | Eukaryota>Opisthokonta>Metazoa>Cnidaria | Acropora digitifera    | GCF_000222465.1 |
| XP_015778872.1 | SIG+GT4+VWA+SERAprtease | 1221 | LOC107356762         | Eukaryota>Opisthokonta>Metazoa>Cnidaria | Acropora digitifera    | GCF_000222465.1 |
| XP_015778880.1 | SIG+GT4+VWA+SERAprtease | 1218 | LOC107356768         | Eukaryota>Opisthokonta>Metazoa>Cnidaria | Acropora digitifera    | GCF_000222465.1 |
| XP_015778878.1 | SIG+GT4+VWA+SERAprtease | 1221 | LOC107356768         | Eukaryota>Opisthokonta>Metazoa>Cnidaria | Acropora digitifera    | GCF_000222465.1 |
| XP_015778879.1 | SIG+GT4+VWA+SERAprtease | 1221 | LOC107356768         | Eukaryota>Opisthokonta>Metazoa>Cnidaria | Acropora digitifera    | GCF_000222465.1 |
| XP_015751629.1 | DED+TPR+GT4             | 1894 | LOC107331536         | Eukaryota>Opisthokonta>Metazoa>Cnidaria | Acropora digitifera    | GCF_000222465.1 |
| XP_015751628.1 | DED+TPR+GT4             | 2015 | LOC107331536         | Eukaryota>Opisthokonta>Metazoa>Cnidaria | Acropora digitifera    | GCF_000222465.1 |
| XP_015751627.1 | DED+TPR+GT4             | 2019 | LOC107331536         | Eukaryota>Opisthokonta>Metazoa>Cnidaria | Acropora digitifera    | GCF_000222465.1 |
| XP_015751626.1 | DED+TPR+GT4             | 2020 | LOC107331536         | Eukaryota>Opisthokonta>Metazoa>Cnidaria | Acropora digitifera    | GCF_000222465.1 |
| XP_015758975.1 | SIG+TPR+GT4             | 1867 | LOC107338255         | Eukaryota>Opisthokonta>Metazoa>Cnidaria | Acropora digitifera    | GCF_000222465.1 |
| KXJ17955.1     | DED+TPR+GT4             | 1737 | AC249_AIPGENE20062   | Eukaryota>Opisthokonta>Metazoa>Cnidaria | Exaiptasia diaphana    | GCA_001417965.1 |
| KXJ23466.1     | DED+GT4                 | 1693 | Samd9l               | Eukaryota>Opisthokonta>Metazoa>Cnidaria | Exaiptasia diaphana    | GCA_001417965.1 |
| XP_001627530.1 | DED+GT4                 | 1802 | NEMVEDRAFT_v1g214094 | Eukaryota>Opisthokonta>Metazoa>Cnidaria | Nematostella vectensis | -               |
| XP_002586741.1 | DED+GT4                 | 538  | BRAFLDRAFT_105739    | Eukaryota>Opisthokonta>Metazoa>Chordata | Branchiostoma floridae | -               |
| XP_002593761.1 | sGTP+GT4                | 511  | BRAFLDRAFT_107710    | Eukaryota>Opisthokonta>Metazoa>Chordata | Branchiostoma floridae | -               |
| XP_002585662.1 | GT4                     | 514  | BRAFLDRAFT_111592    | Eukaryota>Opisthokonta>Metazoa>Chordata | Branchiostoma floridae | -               |
| XP_002588370.1 | SIG+GT4                 | 424  | BRAFLDRAFT_63320     | Eukaryota>Opisthokonta>Metazoa>Chordata | Branchiostoma floridae | -               |
| XP_002594621.1 | GT4                     | 411  | BRAFLDRAFT_77600     | Eukaryota>Opisthokonta>Metazoa>Chordata | Branchiostoma floridae | -               |

| acc            | architecture             | len  | gen.name         | tax                                         | species                  | GCA             |
|----------------|--------------------------|------|------------------|---------------------------------------------|--------------------------|-----------------|
| XP_002594622.1 | DEATH+GT4                | 506  | BRAFLDRAFT_77601 | Eukaryota>Opisthokonta>Metazoa>Chordata     | Branchiostoma floridae   | -               |
| XP_002604494.1 | GT4                      | 475  | BRAFLDRAFT_79207 | Eukaryota>Opisthokonta>Metazoa>Chordata     | Branchiostoma floridae   | -               |
| XP_002731475.1 | GT4                      | 433  | LOC100372804     | Eukaryota>Opisthokonta>Metazoa>Hemichordata | Saccoglossus kowalevskii | GCF_000003605.2 |
| XP_015772447.1 | GT4+TPR                  | 596  | LOC107350717     | Eukaryota>Opisthokonta>Metazoa>Cnidaria     | Acropora digitifera      | GCF_000222465.1 |
| XP_015772446.1 | GT4+TPR                  | 623  | LOC107350717     | Eukaryota>Opisthokonta>Metazoa>Cnidaria     | Acropora digitifera      | GCF_000222465.1 |
| XP_015772445.1 | GT4+TPR                  | 624  | LOC107350717     | Eukaryota>Opisthokonta>Metazoa>Cnidaria     | Acropora digitifera      | GCF_000222465.1 |
| XP_015772444.1 | GT4+TPR                  | 642  | LOC107350717     | Eukaryota>Opisthokonta>Metazoa>Cnidaria     | Acropora digitifera      | GCF_000222465.1 |
| XP_015772442.1 | GT4+TPR                  | 674  | LOC107350717     | Eukaryota>Opisthokonta>Metazoa>Cnidaria     | Acropora digitifera      | GCF_000222465.1 |
| XP_015772443.1 | GT4+TPR                  | 674  | LOC107350717     | Eukaryota>Opisthokonta>Metazoa>Cnidaria     | Acropora digitifera      | GCF_000222465.1 |
| XP_015775035.1 | GT4+TPR                  | 635  | LOC107353224     | Eukaryota>Opisthokonta>Metazoa>Cnidaria     | Acropora digitifera      | GCF_000222465.1 |
| XP_015770118.1 | GT4+sGTP+sGTP+DEATH      | 1249 | LOC107348573     | Eukaryota>Opisthokonta>Metazoa>Cnidaria     | Acropora digitifera      | GCF_000222465.1 |
| XP_015770115.1 | GT4+sGTP+sGTP+DEATH      | 1249 | LOC107348573     | Eukaryota>Opisthokonta>Metazoa>Cnidaria     | Acropora digitifera      | GCF_000222465.1 |
| XP_015770116.1 | GT4+sGTP+sGTP+DEATH      | 1249 | LOC107348573     | Eukaryota>Opisthokonta>Metazoa>Cnidaria     | Acropora digitifera      | GCF_000222465.1 |
| XP_015770117.1 | GT4+sGTP+sGTP+DEATH      | 1249 | LOC107348573     | Eukaryota>Opisthokonta>Metazoa>Cnidaria     | Acropora digitifera      | GCF_000222465.1 |
| XP_015770113.1 | GT4+sGTP+sGTP+DEATH      | 1249 | LOC107348573     | Eukaryota>Opisthokonta>Metazoa>Cnidaria     | Acropora digitifera      | GCF_000222465.1 |
| XP_015776051.1 | GT4+sGTP                 | 1386 | LOC107354135     | Eukaryota>Opisthokonta>Metazoa>Cnidaria     | Acropora digitifera      | GCF_000222465.1 |
| XP_015764075.1 | GT4+NACHT                | 1225 | LOC107343052     | Eukaryota>Opisthokonta>Metazoa>Cnidaria     | Acropora digitifera      | GCF_000222465.1 |
| XP_015764074.1 | GT4+NACHT                | 1233 | LOC107343052     | Eukaryota>Opisthokonta>Metazoa>Cnidaria     | Acropora digitifera      | GCF_000222465.1 |
| XP_015764072.1 | GT4+NACHT                | 1238 | LOC107343052     | Eukaryota>Opisthokonta>Metazoa>Cnidaria     | Acropora digitifera      | GCF_000222465.1 |
| XP_015764073.1 | GT4+NACHT                | 1238 | LOC107343052     | Eukaryota>Opisthokonta>Metazoa>Cnidaria     | Acropora digitifera      | GCF_000222465.1 |
| XP_015764071.1 | GT4+NACHT                | 1255 | LOC107343052     | Eukaryota>Opisthokonta>Metazoa>Cnidaria     | Acropora digitifera      | GCF_000222465.1 |
| XP_015764070.1 | GT4+NACHT                | 1259 | LOC107343052     | Eukaryota>Opisthokonta>Metazoa>Cnidaria     | Acropora digitifera      | GCF_000222465.1 |
| XP_015747310.1 | GT4+NACHT                | 1361 | LOC107327069     | Eukaryota>Opisthokonta>Metazoa>Cnidaria     | Acropora digitifera      | GCF_000222465.1 |
| XP_015772577.1 | GT4+NACHT                | 1796 | LOC107350842     | Eukaryota>Opisthokonta>Metazoa>Cnidaria     | Acropora digitifera      | GCF_000222465.1 |
| XP_015772579.1 | SAP+GT4+NACHT            | 2199 | LOC107350844     | Eukaryota>Opisthokonta>Metazoa>Cnidaria     | Acropora digitifera      | GCF_000222465.1 |
| XP_015776067.1 | GT4+NACHT                | 1600 | LOC107354137     | Eukaryota>Opisthokonta>Metazoa>Cnidaria     | Acropora digitifera      | GCF_000222465.1 |
| XP_015776066.1 | SIG+GT4+NACHT            | 1671 | LOC107354137     | Eukaryota>Opisthokonta>Metazoa>Cnidaria     | Acropora digitifera      | GCF_000222465.1 |
| XP_015759030.1 | sGTP+GT4+TM              | 1258 | LOC107338309     | Eukaryota>Opisthokonta>Metazoa>Cnidaria     | Acropora digitifera      | GCF_000222465.1 |
| XP_015759029.1 | sGTP+GT4+TM              | 1258 | LOC107338309     | Eukaryota>Opisthokonta>Metazoa>Cnidaria     | Acropora digitifera      | GCF_000222465.1 |
| XP_015759028.1 | sGTP+GT4+TM              | 1271 | LOC107338309     | Eukaryota>Opisthokonta>Metazoa>Cnidaria     | Acropora digitifera      | GCF_000222465.1 |
| XP_015759026.1 | sGTP+GT4+TM              | 1272 | LOC107338309     | Eukaryota>Opisthokonta>Metazoa>Cnidaria     | Acropora digitifera      | GCF_000222465.1 |
| XP_015759027.1 | sGTP+GT4+TM              | 1272 | LOC107338309     | Eukaryota>Opisthokonta>Metazoa>Cnidaria     | Acropora digitifera      | GCF_000222465.1 |
| XP_015749674.1 | GT4+PNPase               | 965  | LOC107329499     | Eukaryota>Opisthokonta>Metazoa>Cnidaria     | Acropora digitifera      | GCF_000222465.1 |
| XP_015749675.1 | GT4+PNPase               | 965  | LOC107329499     | Eukaryota>Opisthokonta>Metazoa>Cnidaria     | Acropora digitifera      | GCF_000222465.1 |
| XP_015749860.1 | GT4+PNPase+NABD-unk4     | 933  | LOC107329706     | Eukaryota>Opisthokonta>Metazoa>Cnidaria     | Acropora digitifera      | GCF_000222465.1 |
| XP_015749859.1 | GT4+PNPase+NABD-unk4     | 961  | LOC107329706     | Eukaryota>Opisthokonta>Metazoa>Cnidaria     | Acropora digitifera      | GCF_000222465.1 |
| XP_015749858.1 | GT4+PNPase+NABD-unk4     | 982  | LOC107329706     | Eukaryota>Opisthokonta>Metazoa>Cnidaria     | Acropora digitifera      | GCF_000222465.1 |
| XP_015770482.1 | GT4                      | 132  | LOC107348905     | Eukaryota>Opisthokonta>Metazoa>Cnidaria     | Acropora digitifera      | GCF_000222465.1 |
| XP_015777289.1 | GT4                      | 119  | LOC107355256     | Eukaryota>Opisthokonta>Metazoa>Cnidaria     | Acropora digitifera      | GCF_000222465.1 |
| XP_015777288.1 | GT4                      | 135  | LOC107355256     | Eukaryota>Opisthokonta>Metazoa>Cnidaria     | Acropora digitifera      | GCF_000222465.1 |
| XP_015777287.1 | GT4                      | 135  | LOC107355256     | Eukaryota>Opisthokonta>Metazoa>Cnidaria     | Acropora digitifera      | GCF_000222465.1 |
| XP_015777286.1 | GT4                      | 135  | LOC107355256     | Eukaryota>Opisthokonta>Metazoa>Cnidaria     | Acropora digitifera      | GCF_000222465.1 |
| XP_015754287.1 | GT4+ANK                  | 1391 | LOC107333936     | Eukaryota>Opisthokonta>Metazoa>Cnidaria     | Acropora digitifera      | GCF_000222465.1 |
| XP_015754286.1 | GT4+ANK                  | 1391 | LOC107333936     | Eukaryota>Opisthokonta>Metazoa>Cnidaria     | Acropora digitifera      | GCF_000222465.1 |
| XP_015754284.1 | GT4+ANK                  | 1391 | LOC107333936     | Eukaryota>Opisthokonta>Metazoa>Cnidaria     | Acropora digitifera      | GCF_000222465.1 |
| XP_015779234.1 | GT4+ANK+Immank+Immank    | 1392 | LOC107357096     | Eukaryota>Opisthokonta>Metazoa>Cnidaria     | Acropora digitifera      | GCF_000222465.1 |
| XP_015780882.1 | GT4+DEATH                | 240  | LOC107358816     | Eukaryota>Opisthokonta>Metazoa>Cnidaria     | Acropora digitifera      | GCF_000222465.1 |
| XP_015780881.1 | GT4+DEATH                | 243  | LOC107358816     | Eukaryota>Opisthokonta>Metazoa>Cnidaria     | Acropora digitifera      | GCF_000222465.1 |
| XP_015780880.1 | GT4+DEATH                | 247  | LOC107358816     | Eukaryota>Opisthokonta>Metazoa>Cnidaria     | Acropora digitifera      | GCF_000222465.1 |
| XP_015780879.1 | GT4+DEATH                | 250  | LOC107358816     | Eukaryota>Opisthokonta>Metazoa>Cnidaria     | Acropora digitifera      | GCF_000222465.1 |
| XP_015754283.1 | GT4+ANK+DED+APATPase+TPR | 1546 | LOC107333935     | Eukaryota>Opisthokonta>Metazoa>Cnidaria     | Acropora digitifera      | GCF_000222465.1 |
| XP_015754282.1 | GT4+ANK+DED+APATPase+TPR | 1560 | LOC107333935     | Eukaryota>Opisthokonta>Metazoa>Cnidaria     | Acropora digitifera      | GCF_000222465.1 |

| acc            | architecture             | len  | gen.name          | tax                                     | species                   | GCA             |
|----------------|--------------------------|------|-------------------|-----------------------------------------|---------------------------|-----------------|
| XP_015754281.1 | GT4+ANK+DED+APATPase+TPR | 1597 | LOC107333935      | Eukaryota>Opisthokonta>Metazoa>Cnidaria | Acropora digitifera       | GCF_000222465.1 |
| XP_015754288.1 | GT4+ANK                  | 1351 | LOC107333936      | Eukaryota>Opisthokonta>Metazoa>Cnidaria | Acropora digitifera       | GCF_000222465.1 |
| XP_015778952.1 | GT4+ANK+Immank+Immank    | 1280 | LOC107356842      | Eukaryota>Opisthokonta>Metazoa>Cnidaria | Acropora digitifera       | GCF_000222465.1 |
| XP_015779236.1 | GT4+Immank+ANK           | 1086 | LOC107357098      | Eukaryota>Opisthokonta>Metazoa>Cnidaria | Acropora digitifera       | GCF_000222465.1 |
| XP_015764079.1 | GT4+NACHT                | 1177 | LOC107343052      | Eukaryota>Opisthokonta>Metazoa>Cnidaria | Acropora digitifera       | GCF_000222465.1 |
| XP_015764078.1 | GT4+NACHT                | 1178 | LOC107343052      | Eukaryota>Opisthokonta>Metazoa>Cnidaria | Acropora digitifera       | GCF_000222465.1 |
| XP_015764077.1 | GT4+NACHT                | 1188 | LOC107343052      | Eukaryota>Opisthokonta>Metazoa>Cnidaria | Acropora digitifera       | GCF_000222465.1 |
| XP_015764083.1 | GT4+NACHT                | 1101 | LOC107343052      | Eukaryota>Opisthokonta>Metazoa>Cnidaria | Acropora digitifera       | GCF_000222465.1 |
| XP_015764082.1 | GT4+NACHT                | 1107 | LOC107343052      | Eukaryota>Opisthokonta>Metazoa>Cnidaria | Acropora digitifera       | GCF_000222465.1 |
| XP_015764081.1 | GT4+NACHT                | 1161 | LOC107343052      | Eukaryota>Opisthokonta>Metazoa>Cnidaria | Acropora digitifera       | GCF_000222465.1 |
| XP_015778876.1 | SIG+GT4+VWA+SERAprotease | 1080 | LOC107356762      | Eukaryota>Opisthokonta>Metazoa>Cnidaria | Acropora digitifera       | GCF_000222465.1 |
| XP_015778875.1 | SIG+GT4+VWA+SERAprotease | 1145 | LOC107356762      | Eukaryota>Opisthokonta>Metazoa>Cnidaria | Acropora digitifera       | GCF_000222465.1 |
| XP_015778882.1 | SIG+GT4+VWA+SERAprotease | 1145 | LOC107356768      | Eukaryota>Opisthokonta>Metazoa>Cnidaria | Acropora digitifera       | GCF_000222465.1 |
| XP_015771521.1 | SIG+GT4                  | 729  | LOC107349844      | Eukaryota>Opisthokonta>Metazoa>Cnidaria | Acropora digitifera       | GCF_000222465.1 |
| XP_015771522.1 | SIG+GT4                  | 729  | LOC107349844      | Eukaryota>Opisthokonta>Metazoa>Cnidaria | Acropora digitifera       | GCF_000222465.1 |
| XP_015771520.1 | SIG+GT4                  | 756  | LOC107349844      | Eukaryota>Opisthokonta>Metazoa>Cnidaria | Acropora digitifera       | GCF_000222465.1 |
| XP_015750317.1 | GT4+ZU5                  | 721  | LOC107330190      | Eukaryota>Opisthokonta>Metazoa>Cnidaria | Acropora digitifera       | GCF_000222465.1 |
| XP_015770123.1 | GT4                      | 704  | LOC107348579      | Eukaryota>Opisthokonta>Metazoa>Cnidaria | Acropora digitifera       | GCF_000222465.1 |
| XP_015770122.1 | GT4                      | 705  | LOC107348579      | Eukaryota>Opisthokonta>Metazoa>Cnidaria | Acropora digitifera       | GCF_000222465.1 |
| XP_015752964.1 | SIG+GT4                  | 564  | LOC107332737      | Eukaryota>Opisthokonta>Metazoa>Cnidaria | Acropora digitifera       | GCF_000222465.1 |
| XP_015752963.1 | SIG+GT4                  | 565  | LOC107332737      | Eukaryota>Opisthokonta>Metazoa>Cnidaria | Acropora digitifera       | GCF_000222465.1 |
| XP_015756764.1 | SIG+GT4                  | 570  | LOC107336220      | Eukaryota>Opisthokonta>Metazoa>Cnidaria | Acropora digitifera       | GCF_000222465.1 |
| OLD79042.1     | GT4                      | 474  | AUF62_00760       | Archaea                                 | archaeon 13_1_20CM_52_20  | GCA_001919675.1 |
| OLC62495.1     | GT4                      | 495  | AUH73_04505       | Archaea                                 | archaeon 13_1_40CM_4_53_4 | GCA_001918315.1 |
| OLB46884.1     | GT4                      | 495  | AUI07_02860       | Archaea                                 | archaeon 13_2_20CM_2_53_6 | GCA_001915065.1 |
| XP_015765897.1 | GT4                      | 245  | LOC107344718      | Eukaryota>Opisthokonta>Metazoa>Cnidaria | Acropora digitifera       | GCF_000222465.1 |
| XP_015768791.1 | GT4                      | 252  | LOC107347414      | Eukaryota>Opisthokonta>Metazoa>Cnidaria | Acropora digitifera       | GCF_000222465.1 |
| XP_015773769.1 | GT4                      | 263  | LOC107351980      | Eukaryota>Opisthokonta>Metazoa>Cnidaria | Acropora digitifera       | GCF_000222465.1 |
| XP_015754295.1 | GT4                      | 202  | LOC107333943      | Eukaryota>Opisthokonta>Metazoa>Cnidaria | Acropora digitifera       | GCF_000222465.1 |
| XP_015754297.1 | GT4                      | 202  | LOC107333943      | Eukaryota>Opisthokonta>Metazoa>Cnidaria | Acropora digitifera       | GCF_000222465.1 |
| XP_015754296.1 | GT4                      | 202  | LOC107333943      | Eukaryota>Opisthokonta>Metazoa>Cnidaria | Acropora digitifera       | GCF_000222465.1 |
| XP_015764068.1 | GT4+NACHT                | 1309 | LOC107343052      | Eukaryota>Opisthokonta>Metazoa>Cnidaria | Acropora digitifera       | GCF_000222465.1 |
| XP_015764067.1 | GT4+NACHT                | 1312 | LOC107343052      | Eukaryota>Opisthokonta>Metazoa>Cnidaria | Acropora digitifera       | GCF_000222465.1 |
| XP_015747884.1 | RVT+DEATH+ZU5+ZU5+GT4    | 1232 | LOC107327653      | Eukaryota>Opisthokonta>Metazoa>Cnidaria | Acropora digitifera       | GCF_000222465.1 |
| XP_015747883.1 | RVT+DEATH+ZU5+ZU5+GT4    | 1238 | LOC107327653      | Eukaryota>Opisthokonta>Metazoa>Cnidaria | Acropora digitifera       | GCF_000222465.1 |
| XP_015765549.1 | GT4+ANK                  | 1083 | LOC107344415      | Eukaryota>Opisthokonta>Metazoa>Cnidaria | Acropora digitifera       | GCF_000222465.1 |
| XP_015765548.1 | GT4+ANK                  | 1084 | LOC107344415      | Eukaryota>Opisthokonta>Metazoa>Cnidaria | Acropora digitifera       | GCF_000222465.1 |
| XP_015780922.1 | GT4+GT4                  | 738  | LOC107358864      | Eukaryota>Opisthokonta>Metazoa>Cnidaria | Acropora digitifera       | GCF_000222465.1 |
| XP_015780923.1 | GT4+GT4                  | 738  | LOC107358864      | Eukaryota>Opisthokonta>Metazoa>Cnidaria | Acropora digitifera       | GCF_000222465.1 |
| XP_015760897.1 | GT4                      | 651  | LOC107340068      | Eukaryota>Opisthokonta>Metazoa>Cnidaria | Acropora digitifera       | GCF_000222465.1 |
| XP_015760896.1 | GT4                      | 652  | LOC107340068      | Eukaryota>Opisthokonta>Metazoa>Cnidaria | Acropora digitifera       | GCF_000222465.1 |
| XP_015748510.1 | GT4                      | 305  | LOC107328284      | Eukaryota>Opisthokonta>Metazoa>Cnidaria | Acropora digitifera       | GCF_000222465.1 |
| XP_015776097.1 | GT4                      | 305  | LOC107354170      | Eukaryota>Opisthokonta>Metazoa>Cnidaria | Acropora digitifera       | GCF_000222465.1 |
| XP_002599631.1 | GT4+GTPase-AIG           | 700  | BRAFLDRAFT_102570 | Eukaryota>Opisthokonta>Metazoa>Chordata | Branchiostoma floridae    | -               |
| XP_002586742.1 | GT4                      | 133  | BRAFLDRAFT_105740 | Eukaryota>Opisthokonta>Metazoa>Chordata | Branchiostoma floridae    | -               |
| XP_002606956.1 | GT4                      | 718  | BRAFLDRAFT_64952  | Eukaryota>Opisthokonta>Metazoa>Chordata | Branchiostoma floridae    | -               |
| XP_002592892.1 | GT4                      | 115  | BRAFLDRAFT_65478  | Eukaryota>Opisthokonta>Metazoa>Chordata | Branchiostoma floridae    | -               |
| XP_002605447.1 | GT4                      | 734  | BRAFLDRAFT_74262  | Eukaryota>Opisthokonta>Metazoa>Chordata | Branchiostoma floridae    | -               |
| XP_002598007.1 | GT4                      | 253  | BRAFLDRAFT_79766  | Eukaryota>Opisthokonta>Metazoa>Chordata | Branchiostoma floridae    | -               |
| XP_015747221.1 | GT4                      | 151  | LOC107326989      | Eukaryota>Opisthokonta>Metazoa>Cnidaria | Acropora digitifera       | GCF_000222465.1 |
| XP_015747315.1 | GT4                      | 232  | LOC107327073      | Eukaryota>Opisthokonta>Metazoa>Cnidaria | Acropora digitifera       | GCF_000222465.1 |
| XP_015748075.1 | GT4                      | 636  | LOC107327853      | Eukaryota>Opisthokonta>Metazoa>Cnidaria | Acropora digitifera       | GCF_000222465.1 |

| acc            | architecture             | len  | gen.name         | tax                                         | species                         | GCA             |
|----------------|--------------------------|------|------------------|---------------------------------------------|---------------------------------|-----------------|
| XP_015759886.1 | GT4                      | 685  | LOC107339155     | Eukaryota>Opisthokonta>Metazoa>Cnidaria     | Acropora digitifera             | GCF_000222465.1 |
| XP_015764084.1 | GT4+NACHT                | 901  | LOC107343052     | Eukaryota>Opisthokonta>Metazoa>Cnidaria     | Acropora digitifera             | GCF_000222465.1 |
| XP_015767948.1 | GT4                      | 201  | LOC107346661     | Eukaryota>Opisthokonta>Metazoa>Cnidaria     | Acropora digitifera             | GCF_000222465.1 |
| XP_015774918.1 | GT4+NACHT                | 1264 | LOC107353111     | Eukaryota>Opisthokonta>Metazoa>Cnidaria     | Acropora digitifera             | GCF_000222465.1 |
| XP_015777737.1 | GT4                      | 925  | LOC107355671     | Eukaryota>Opisthokonta>Metazoa>Cnidaria     | Acropora digitifera             | GCF_000222465.1 |
| XP_015748669.1 | GT4                      | 245  | LOC107328450     | Eukaryota>Opisthokonta>Metazoa>Cnidaria     | Acropora digitifera             | GCF_000222465.1 |
| XP_015750057.1 | GT4                      | 520  | LOC107329915     | Eukaryota>Opisthokonta>Metazoa>Cnidaria     | Acropora digitifera             | GCF_000222465.1 |
| XP_015754313.1 | GT4                      | 241  | LOC107333962     | Eukaryota>Opisthokonta>Metazoa>Cnidaria     | Acropora digitifera             | GCF_000222465.1 |
| XP_015761270.1 | GT4                      | 712  | LOC107340435     | Eukaryota>Opisthokonta>Metazoa>Cnidaria     | Acropora digitifera             | GCF_000222465.1 |
| XP_015770112.1 | GT4                      | 253  | LOC107348572     | Eukaryota>Opisthokonta>Metazoa>Cnidaria     | Acropora digitifera             | GCF_000222465.1 |
| XP_015771016.1 | GT4                      | 390  | LOC107349380     | Eukaryota>Opisthokonta>Metazoa>Cnidaria     | Acropora digitifera             | GCF_000222465.1 |
| XP_015771260.1 | GT4                      | 491  | LOC107349592     | Eukaryota>Opisthokonta>Metazoa>Cnidaria     | Acropora digitifera             | GCF_000222465.1 |
| XP_015772349.1 | GT4                      | 256  | LOC107350627     | Eukaryota>Opisthokonta>Metazoa>Cnidaria     | Acropora digitifera             | GCF_000222465.1 |
| XP_015777221.1 | GT4                      | 205  | LOC107355205     | Eukaryota>Opisthokonta>Metazoa>Cnidaria     | Acropora digitifera             | GCF_000222465.1 |
| XP_015778002.1 | GT4                      | 437  | LOC107355902     | Eukaryota>Opisthokonta>Metazoa>Cnidaria     | Acropora digitifera             | GCF_000222465.1 |
| XP_015779016.1 | GT4                      | 186  | LOC107356899     | Eukaryota>Opisthokonta>Metazoa>Cnidaria     | Acropora digitifera             | GCF_000222465.1 |
| XP_015780870.1 | GT4                      | 274  | LOC107358800     | Eukaryota>Opisthokonta>Metazoa>Cnidaria     | Acropora digitifera             | GCF_000222465.1 |
| AFD00853.1     | GT4                      | 431  | Mtc_2115         | Archaea>Euryarchaeota                       | Methanocella conradii HZ254     | GCA_000251105.1 |
| AGB33684.1     | GT4                      | 394  | Natpe_3933       | Archaea>Euryarchaeota                       | Natrinema pellirubrum DSM 15624 | GCA_000230735.3 |
| XP_015751533.1 | GT4+NACHT                | 797  | LOC107331457     | Eukaryota>Opisthokonta>Metazoa>Cnidaria     | Acropora digitifera             | GCF_000222465.1 |
| XP_015747435.1 | GT4+NACHT                | 357  | LOC107327199     | Eukaryota>Opisthokonta>Metazoa>Cnidaria     | Acropora digitifera             | GCF_000222465.1 |
| XP_015759313.1 | GT4+NACHT                | 988  | LOC107338581     | Eukaryota>Opisthokonta>Metazoa>Cnidaria     | Acropora digitifera             | GCF_000222465.1 |
| XP_015759411.1 | GT4+NACHT                | 1346 | LOC107338694     | Eukaryota>Opisthokonta>Metazoa>Cnidaria     | Acropora digitifera             | GCF_000222465.1 |
| XP_015769571.1 | GT4+NACHT                | 716  | LOC107348075     | Eukaryota>Opisthokonta>Metazoa>Cnidaria     | Acropora digitifera             | GCF_000222465.1 |
| XP_015773770.1 | GT4+APATPase             | 1843 | LOC107351981     | Eukaryota>Opisthokonta>Metazoa>Cnidaria     | Acropora digitifera             | GCF_000222465.1 |
| XP_015779460.1 | GT4+NACHT                | 537  | LOC107357334     | Eukaryota>Opisthokonta>Metazoa>Cnidaria     | Acropora digitifera             | GCF_000222465.1 |
| XP_015756756.1 | GT4+NACHT+NACHT          | 770  | LOC107336211     | Eukaryota>Opisthokonta>Metazoa>Cnidaria     | Acropora digitifera             | GCF_000222465.1 |
| XP_015764080.1 | GT4+NACHT                | 1168 | LOC107343052     | Eukaryota>Opisthokonta>Metazoa>Cnidaria     | Acropora digitifera             | GCF_000222465.1 |
| XP_015764069.1 | GT4+NACHT                | 1295 | LOC107343052     | Eukaryota>Opisthokonta>Metazoa>Cnidaria     | Acropora digitifera             | GCF_000222465.1 |
| XP_015770110.1 | GT4+APATPase+NACHT       | 1677 | LOC107348570     | Eukaryota>Opisthokonta>Metazoa>Cnidaria     | Acropora digitifera             | GCF_000222465.1 |
| XP_015749857.1 | GT4+PNPase+NABD-unk4     | 1031 | LOC107329706     | Eukaryota>Opisthokonta>Metazoa>Cnidaria     | Acropora digitifera             | GCF_000222465.1 |
| XP_015778949.1 | GT4+GT4                  | 1007 | LOC107356840     | Eukaryota>Opisthokonta>Metazoa>Cnidaria     | Acropora digitifera             | GCF_000222465.1 |
| XP_002610411.1 | GT4+DEATH                | 1032 | BRAFLDRAFT_72365 | Eukaryota>Opisthokonta>Metazoa>Chordata     | Branchiostoma floridae          | -               |
| XP_015768823.1 | GT4+DEATH                | 402  | LOC107347423     | Eukaryota>Opisthokonta>Metazoa>Cnidaria     | Acropora digitifera             | GCF_000222465.1 |
| XP_015761974.1 | SIG+GT4                  | 503  | LOC107341068     | Eukaryota>Opisthokonta>Metazoa>Cnidaria     | Acropora digitifera             | GCF_000222465.1 |
| XP_002599100.1 | GT4                      | 900  | BRAFLDRAFT_81765 | Eukaryota>Opisthokonta>Metazoa>Chordata     | Branchiostoma floridae          | -               |
| XP_002601934.1 | GT4                      | 652  | BRAFLDRAFT_86418 | Eukaryota>Opisthokonta>Metazoa>Chordata     | Branchiostoma floridae          | -               |
| XP_015753083.1 | SIG+GT4                  | 678  | LOC107332846     | Eukaryota>Opisthokonta>Metazoa>Cnidaria     | Acropora digitifera             | GCF_000222465.1 |
| XP_015770111.1 | SIG+GT4+NACHT            | 1452 | LOC107348571     | Eukaryota>Opisthokonta>Metazoa>Cnidaria     | Acropora digitifera             | GCF_000222465.1 |
| XP_015759562.1 | GT4                      | 954  | LOC107338825     | Eukaryota>Opisthokonta>Metazoa>Cnidaria     | Acropora digitifera             | GCF_000222465.1 |
| XP_015772173.1 | GT4                      | 684  | LOC107350460     | Eukaryota>Opisthokonta>Metazoa>Cnidaria     | Acropora digitifera             | GCF_000222465.1 |
| XP_015767496.1 | GT4+PNPase               | 423  | LOC107346243     | Eukaryota>Opisthokonta>Metazoa>Cnidaria     | Acropora digitifera             | GCF_000222465.1 |
| XP_002610420.1 | CARD+sGTP+DEATH+GT4      | 1671 | BRAFLDRAFT_72355 | Eukaryota>Opisthokonta>Metazoa>Chordata     | Branchiostoma floridae          | -               |
| XP_002601932.1 | CARD+sGTP+DEATH+GT4+CARD | 2070 | BRAFLDRAFT_86416 | Eukaryota>Opisthokonta>Metazoa>Chordata     | Branchiostoma floridae          | -               |
| XP_002606064.1 | GT4+TIR                  | 594  | BRAFLDRAFT_92083 | Eukaryota>Opisthokonta>Metazoa>Chordata     | Branchiostoma floridae          | -               |
| XP_015747743.1 | GT4+SidE                 | 864  | LOC107327511     | Eukaryota>Opisthokonta>Metazoa>Cnidaria     | Acropora digitifera             | GCF_000222465.1 |
| XP_015771496.1 | GT4+TPR+TPR+TPR+RVT      | 1988 | LOC107349827     | Eukaryota>Opisthokonta>Metazoa>Cnidaria     | Acropora digitifera             | GCF_000222465.1 |
| XP_015777375.1 | GT4+ANK                  | 878  | LOC107355332     | Eukaryota>Opisthokonta>Metazoa>Cnidaria     | Acropora digitifera             | GCF_000222465.1 |
| XP_006812785.1 | GT4+PIN+HEPN             | 648  | LOC102807894     | Eukaryota>Opisthokonta>Metazoa>Hemichordata | Saccoglossus kowalevskii        | GCF_000003605.2 |
| XP_002601187.1 | ImmLRR+LRR+sGTP+OTU+GT4  | 1577 | BRAFLDRAFT_75632 | Eukaryota>Opisthokonta>Metazoa>Chordata     | Branchiostoma floridae          | -               |
| XP_015779017.1 | GT4+RNA-Helicase+CXC     | 1910 | LOC107356900     | Eukaryota>Opisthokonta>Metazoa>Cnidaria     | Acropora digitifera             | GCF_000222465.1 |
| XP_015767918.1 | GT4+NACHT                | 1211 | LOC107346622     | Eukaryota>Opisthokonta>Metazoa>Cnidaria     | Acropora digitifera             | GCF_000222465.1 |

| acc            | architecture                                                                                                                  | len  | gen.name          | tax                                         | species                   | GCA             |
|----------------|-------------------------------------------------------------------------------------------------------------------------------|------|-------------------|---------------------------------------------|---------------------------|-----------------|
| XP_015747744.1 | GT4+GT4                                                                                                                       | 1044 | LOC107327512      | Eukaryota>Opisthokonta>Metazoa>Cnidaria     | Acropora digitifera       | GCF_000222465.1 |
| XP_006822589.1 | TM+TM+BetaPropeller+BetaPropeller+GT4+ANK+Immank+ANK+ANK+Immank+Immank+Immank                                                 | 3508 | LOC102803126      | Eukaryota>Opisthokonta>Metazoa>Hemichordata | Saccoglossus kowalevskii  | GCF_000003605.2 |
| XP_002608839.1 | DED+DED+OTU+GT4+DEATH                                                                                                         | 1285 | BRAFLDRAFT_89707  | Eukaryota>Opisthokonta>Metazoa>Chordata     | Branchiostoma floridae    | -               |
| XP_002602261.1 | ANK+DEATH+GT4                                                                                                                 | 983  | BRAFLDRAFT_76949  | Eukaryota>Opisthokonta>Metazoa>Chordata     | Branchiostoma floridae    | -               |
| XP_006824651.1 | SIG+EGF+EGF+EGF+CLECTIN+GT4                                                                                                   | 945  | LOC102808514      | Eukaryota>Opisthokonta>Metazoa>Hemichordata | Saccoglossus kowalevskii  | GCF_000003605.2 |
| XP_015754275.1 | GT4+GT4+APATPase+TPR                                                                                                          | 1815 | LOC107333926      | Eukaryota>Opisthokonta>Metazoa>Cnidaria     | Acropora digitifera       | GCF_000222465.1 |
| XP_015764809.1 | GT4+DEATH                                                                                                                     | 660  | LOC107343733      | Eukaryota>Opisthokonta>Metazoa>Cnidaria     | Acropora digitifera       | GCF_000222465.1 |
| XP_015763304.1 | GT4+CR-ATPase4+TPR                                                                                                            | 1073 | LOC107342333      | Eukaryota>Opisthokonta>Metazoa>Cnidaria     | Acropora digitifera       | GCF_000222465.1 |
| XP_015765336.1 | GT4+UBI+UBI+UBI+UBI                                                                                                           | 1194 | LOC107344209      | Eukaryota>Opisthokonta>Metazoa>Cnidaria     | Acropora digitifera       | GCF_000222465.1 |
| XP_015765496.1 | GT4+CASPASE                                                                                                                   | 587  | LOC107344359      | Eukaryota>Opisthokonta>Metazoa>Cnidaria     | Acropora digitifera       | GCF_000222465.1 |
| XP_002601970.1 | DEATH+GT4                                                                                                                     | 1118 | BRAFLDRAFT_94541  | Eukaryota>Opisthokonta>Metazoa>Chordata     | Branchiostoma floridae    | -               |
| XP_015756490.1 | GT4+NACHT                                                                                                                     | 1270 | LOC107335955      | Eukaryota>Opisthokonta>Metazoa>Cnidaria     | Acropora digitifera       | GCF_000222465.1 |
| XP_015754270.1 | GT4+drhyd+NACHT                                                                                                               | 1358 | LOC107333920      | Eukaryota>Opisthokonta>Metazoa>Cnidaria     | Acropora digitifera       | GCF_000222465.1 |
| XP_015780567.1 | GT4+ANK                                                                                                                       | 1294 | LOC107358478      | Eukaryota>Opisthokonta>Metazoa>Cnidaria     | Acropora digitifera       | GCF_000222465.1 |
| XP_015748771.1 | GT4+TM+TM                                                                                                                     | 876  | LOC107328563      | Eukaryota>Opisthokonta>Metazoa>Cnidaria     | Acropora digitifera       | GCF_000222465.1 |
| XP_002606060.1 | GT4+DED+DED+DED+DED                                                                                                           | 1082 | BRAFLDRAFT_92079  | Eukaryota>Opisthokonta>Metazoa>Chordata     | Branchiostoma floridae    | -               |
| XP_015764066.1 | GT4+NACHT                                                                                                                     | 1352 | LOC107343052      | Eukaryota>Opisthokonta>Metazoa>Cnidaria     | Acropora digitifera       | GCF_000222465.1 |
| XP_015754289.1 | GT4+ANK                                                                                                                       | 1133 | LOC107333936      | Eukaryota>Opisthokonta>Metazoa>Cnidaria     | Acropora digitifera       | GCF_000222465.1 |
| XP_002601931.1 | DEATH+GT4                                                                                                                     | 1086 | BRAFLDRAFT_86415  | Eukaryota>Opisthokonta>Metazoa>Chordata     | Branchiostoma floridae    | -               |
| XP_015765568.1 | SIG+ANK+GT4                                                                                                                   | 607  | LOC107344435      | Eukaryota>Opisthokonta>Metazoa>Cnidaria     | Acropora digitifera       | GCF_000222465.1 |
| XP_015771899.1 | SIG+GT4+NACHT+RVT                                                                                                             | 942  | LOC107350190      | Eukaryota>Opisthokonta>Metazoa>Cnidaria     | Acropora digitifera       | GCF_000222465.1 |
| XP_015759049.1 | GT4+TPR+TPR+TPR+sGTP+sGTP                                                                                                     | 2065 | LOC107338329      | Eukaryota>Opisthokonta>Metazoa>Cnidaria     | Acropora digitifera       | GCF_000222465.1 |
| XP_015765567.1 | GT4+ANK                                                                                                                       | 1016 | LOC107344434      | Eukaryota>Opisthokonta>Metazoa>Cnidaria     | Acropora digitifera       | GCF_000222465.1 |
| XP_002601929.1 | CARD+sGTP+DEATH+GT4+sGTP+DEATH+CARD                                                                                           | 3425 | BRAFLDRAFT_86413  | Eukaryota>Opisthokonta>Metazoa>Chordata     | Branchiostoma floridae    | -               |
| XP_002607644.1 | GT4+DEATH+Phytase-like+DEATH+DEATH+DEATH+ZNF+ZNF+CRN-ZnBind.csq+ZNF+ZNF                                                       | 3703 | BRAFLDRAFT_84667  | Eukaryota>Opisthokonta>Metazoa>Chordata     | Branchiostoma floridae    | -               |
| XP_002608763.1 | TPR+TPR+TPR+sGTP+DEATH+GT4                                                                                                    | 2376 | BRAFLDRAFT_73982  | Eukaryota>Opisthokonta>Metazoa>Chordata     | Branchiostoma floridae    | -               |
| XP_002606489.1 | SIG+ImmLRR+DEATH+GT4                                                                                                          | 791  | BRAFLDRAFT_91930  | Eukaryota>Opisthokonta>Metazoa>Chordata     | Branchiostoma floridae    | -               |
| XP_015759356.1 | APATPase+TPR+ZU5+ZU5+GT4                                                                                                      | 1494 | LOC107338634      | Eukaryota>Opisthokonta>Metazoa>Cnidaria     | Acropora digitifera       | GCF_000222465.1 |
| XP_015767926.1 | GT4+NACHT                                                                                                                     | 1234 | LOC107346634      | Eukaryota>Opisthokonta>Metazoa>Cnidaria     | Acropora digitifera       | GCF_000222465.1 |
| XP_006823290.1 | SIG+GT4+TM                                                                                                                    | 1015 | LOC102801620      | Eukaryota>Opisthokonta>Metazoa>Hemichordata | Saccoglossus kowalevskii  | GCF_000003605.2 |
| XP_015777279.1 | GT4+sGTP                                                                                                                      | 1178 | LOC107355250      | Eukaryota>Opisthokonta>Metazoa>Cnidaria     | Acropora digitifera       | GCF_000222465.1 |
| XP_015771245.1 | TPR+TPR+TPR+TPR+TPR+sGTP+GT4                                                                                                  | 1879 | LOC107349580      | Eukaryota>Opisthokonta>Metazoa>Cnidaria     | Acropora digitifera       | GCF_000222465.1 |
| XP_002601933.1 | sGTP+DEATH+GT4+sGTP+DEATH+GT4+CARD+sGTP+DEATH                                                                                 | 4075 | BRAFLDRAFT_86417  | Eukaryota>Opisthokonta>Metazoa>Chordata     | Branchiostoma floridae    | -               |
| XP_002601971.1 | SIG+CARD+sGTP+DEATH+GT4+CARD+sGTP+DEATH+DEATH                                                                                 | 3440 | BRAFLDRAFT_94542  | Eukaryota>Opisthokonta>Metazoa>Chordata     | Branchiostoma floridae    | -               |
| KXJ24237.1     | DED+GT4+GT4                                                                                                                   | 2343 | AC249_AIPGENE4704 | Eukaryota>Opisthokonta>Metazoa>Cnidaria     | Exaiptasia diaphana       | GCA_001417965.1 |
| XP_006814385.1 | DED+TM+GT4                                                                                                                    | 488  | LOC102807017      | Eukaryota>Opisthokonta>Metazoa>Hemichordata | Saccoglossus kowalevskii  | GCF_000003605.2 |
| XP_002592882.1 | SIG+ZU5+ZU5+GT4                                                                                                               | 930  | BRAFLDRAFT_117744 | Eukaryota>Opisthokonta>Metazoa>Chordata     | Branchiostoma floridae    | -               |
| XP_015778947.1 | GT4+ANK+ANK+ANK                                                                                                               | 1575 | LOC107356838      | Eukaryota>Opisthokonta>Metazoa>Cnidaria     | Acropora digitifera       | GCF_000222465.1 |
| XP_002609384.1 | SIG+LRR+sGTP+OTU+GT4+Phytase-like                                                                                             | 1519 | BRAFLDRAFT_86475  | Eukaryota>Opisthokonta>Metazoa>Chordata     | Branchiostoma floridae    | -               |
| XP_002606063.1 | GT4+GTPase-AIG                                                                                                                | 1278 | BRAFLDRAFT_92082  | Eukaryota>Opisthokonta>Metazoa>Chordata     | Branchiostoma floridae    | -               |
| XP_002601968.1 | ZNF+ZNF+ZNF+CARD+sGTP+DEATH+GT4                                                                                               | 1973 | BRAFLDRAFT_94539  | Eukaryota>Opisthokonta>Metazoa>Chordata     | Branchiostoma floridae    | -               |
| XP_015778866.1 | GT4+VWA                                                                                                                       | 1117 | LOC107356760      | Eukaryota>Opisthokonta>Metazoa>Cnidaria     | Acropora digitifera       | GCF_000222465.1 |
| XP_002592893.1 | SIG+DEATH+PspA+GT4                                                                                                            | 873  | BRAFLDRAFT_65479  | Eukaryota>Opisthokonta>Metazoa>Chordata     | Branchiostoma floridae    | -               |
| XP_002610413.1 | sGTP+DEATH+GT4+CARD+sGTP+sGTP+DEATH+GT4                                                                                       | 4179 | BRAFLDRAFT_72363  | Eukaryota>Opisthokonta>Metazoa>Chordata     | Branchiostoma floridae    | -               |
| XP_002599992.1 | GT4+TPR+TPR+TPR+TPR                                                                                                           | 1404 | BRAFLDRAFT_74113  | Eukaryota>Opisthokonta>Metazoa>Chordata     | Branchiostoma floridae    | -               |
| XP_002598016.1 | DEATH+sGTP+ZU5+GT4                                                                                                            | 2055 | BRAFLDRAFT_79758  | Eukaryota>Opisthokonta>Metazoa>Chordata     | Branchiostoma floridae    | -               |
| XP_015765571.1 | GT4+GT4                                                                                                                       | 1248 | LOC107344438      | Eukaryota>Opisthokonta>Metazoa>Cnidaria     | Acropora digitifera       | GCF_000222465.1 |
| XP_002608841.1 | DED+OTU+sGTP+ZU5+DEATH+DEATH+DED+OTU+CASPASE+sGTP+CASPASE+DED+DEATH+OTU+GT4+sGTP+OTU+GT4+DED+DEATH+CASPASE+sGTP+OTU+DED+DEATH | 7154 | BRAFLDRAFT_89710  | Eukaryota>Opisthokonta>Metazoa>Chordata     | Branchiostoma floridae    | -               |
| XP_015754687.1 | SIG+GT4+CR-ATPase4+TPR                                                                                                        | 1371 | LOC107334268      | Eukaryota>Opisthokonta>Metazoa>Cnidaria     | Acropora digitifera       | GCF_000222465.1 |
| XP_014535703.1 | GT4                                                                                                                           | 1299 | PDIP_38710        | Eukaryota>Opisthokonta>Fungi>Ascomycota     | Penicillium digitatum Pd1 | GCF_000315645.1 |
| XP_015767848.1 | GT4+NACHT                                                                                                                     | 1489 | LOC107346556      | Eukaryota>Opisthokonta>Metazoa>Cnidaria     | Acropora digitifera       | GCF_000222465.1 |

| acc            | architecture           | len  | gen.name          | tax                                         | species                  | GCA             |
|----------------|------------------------|------|-------------------|---------------------------------------------|--------------------------|-----------------|
| XP_002599095.1 | DEATH+sGTP+DEATH+GT4   | 1974 | BRAFLDRAFT_81759  | Eukaryota>Opisthokonta>Metazoa>Chordata     | Branchiostoma floridae   | -               |
| XP_015754268.1 | GT4+GT4+GT4+IG         | 2108 | LOC107333918      | Eukaryota>Opisthokonta>Metazoa>Cnidaria     | Acropora digitifera      | GCF_000222465.1 |
| XP_015747885.1 | RVT+DEATH+ZU5+ZU5+GT4  | 1158 | LOC107327653      | Eukaryota>Opisthokonta>Metazoa>Cnidaria     | Acropora digitifera      | GCF_000222465.1 |
| XP_015756824.1 | GT4+APATPase           | 727  | LOC107336267      | Eukaryota>Opisthokonta>Metazoa>Cnidaria     | Acropora digitifera      | GCF_000222465.1 |
| XP_015774399.1 | GT4+CASPASE+CASPASE    | 742  | LOC107352599      | Eukaryota>Opisthokonta>Metazoa>Cnidaria     | Acropora digitifera      | GCF_000222465.1 |
| XP_015752969.1 | GT4                    | 255  | LOC107332740      | Eukaryota>Opisthokonta>Metazoa>Cnidaria     | Acropora digitifera      | GCF_000222465.1 |
| XP_006819467.1 | GT4+TM+TM+Snf7         | 1062 | LOC102807364      | Eukaryota>Opisthokonta>Metazoa>Hemichordata | Saccoglossus kowalevskii | GCF_000003605.2 |
| XP_002602157.1 | DEATH+GT4              | 1248 | BRAFLDRAFT_97971  | Eukaryota>Opisthokonta>Metazoa>Chordata     | Branchiostoma floridae   | -               |
| XP_015774318.1 | PNPase+TPR+ZU5+ZU5+GT4 | 1563 | LOC107352503      | Eukaryota>Opisthokonta>Metazoa>Cnidaria     | Acropora digitifera      | GCF_000222465.1 |
| XP_006818589.1 | TM+GT4                 | 781  | LOC100368229      | Eukaryota>Opisthokonta>Metazoa>Hemichordata | Saccoglossus kowalevskii | GCF_000003605.2 |
| XP_015749947.1 | GT4+CASPASE+CASPASE    | 619  | LOC107329787      | Eukaryota>Opisthokonta>Metazoa>Cnidaria     | Acropora digitifera      | GCF_000222465.1 |
| XP_002610422.1 | sGTP+DEATH+GT4         | 1881 | BRAFLDRAFT_72353  | Eukaryota>Opisthokonta>Metazoa>Chordata     | Branchiostoma floridae   | -               |
| XP_009019645.1 | GT4                    | 717  | HELRODRAFT_161481 | Eukaryota>Opisthokonta>Metazoa>Annelida     | Helobdella robusta       | GCF_000326865.1 |
| XP_015748178.1 | GT4                    | 374  | LOC107327971      | Eukaryota>Opisthokonta>Metazoa>Cnidaria     | Acropora digitifera      | GCF_000222465.1 |
| XP_015750171.1 | GT4                    | 397  | LOC107330034      | Eukaryota>Opisthokonta>Metazoa>Cnidaria     | Acropora digitifera      | GCF_000222465.1 |
| XP_015750733.1 | GT4                    | 186  | LOC107330680      | Eukaryota>Opisthokonta>Metazoa>Cnidaria     | Acropora digitifera      | GCF_000222465.1 |
| XP_015760591.1 | ZU5+GT4                | 573  | LOC107339792      | Eukaryota>Opisthokonta>Metazoa>Cnidaria     | Acropora digitifera      | GCF_000222465.1 |
| XP_002731836.1 | GT4                    | 901  | LOC100368975      | Eukaryota>Opisthokonta>Metazoa>Hemichordata | Saccoglossus kowalevskii | GCF_000003605.2 |
| XP_006814349.1 | GT4                    | 1053 | LOC102800835      | Eukaryota>Opisthokonta>Metazoa>Hemichordata | Saccoglossus kowalevskii | GCF_000003605.2 |
| XP_006811676.1 | GT4                    | 814  | LOC102807814      | Eukaryota>Opisthokonta>Metazoa>Hemichordata | Saccoglossus kowalevskii | GCF_000003605.2 |



Gene neighborhoods and domain architectures of the MNS-like STAND domains (nSTAND2) that is present in a 2-gene operon system each containing a STAND NTPase

| acc          | operon                                                      | architecture           | len | gen.name     | taxend              | species                                            | define                                                                    | gca             |
|--------------|-------------------------------------------------------------|------------------------|-----|--------------|---------------------|----------------------------------------------------|---------------------------------------------------------------------------|-----------------|
| AZF56106.1   | ??+STAND+wHTH→ nSTAND2+wHTH+TPRs+HEPN*→                     | nSTAND2+wHTH+TPRs+HEPN | 621 | C4J84_0196   | Gammaproteobacteria | <i>Pseudomonas</i> sp. R11-23-07                   | hypothetical protein C4J84_0196 [Pseudomonas sp. R11-23-07].              | GCA_003852295.1 |
| EEV8712171.1 | ??+STAND+wHTH→ nSTAND2+wHTH+TPRs+HEPN*→                     | nSTAND2+wHTH+TPRs+HEPN | 596 | EHU50_23110  | Gammaproteobacteria | <i>Escherichia coli</i>                            | hypothetical protein EHU50_23110, partial [Escherichia coli].             | GCA_012057895.1 |
| EEZ9035304.1 | ??+STAND+wHTH→ nSTAND2+wHTH*→                               | nSTAND2+wHTH           | 308 | C2D11_004496 | Gammaproteobacteria | <i>Escherichia coli</i> O75                        | hypothetical protein C2D11_004496, partial [Escherichia coli O75].        | GCA_012229525.1 |
| KAA9385705.1 | nSTAND2+wHTH+TPRs+HEPN*→                                    | nSTAND2+wHTH+TPRs+HEPN | 533 | F4V88_04125  | Alphaproteobacteria | <i>Neorhizobium galegae</i>                        | hypothetical protein F4V88_04125 [Neorhizobium galegae].                  | GCA_008728145.1 |
| KPX30733.1   | ??+STAND+wHTH→ nSTAND2+wHTH+TPRs+HEPN*→                     | nSTAND2+wHTH+TPRs+HEPN | 621 | ALO77_200057 | Gammaproteobacteria | <i>Pseudomonas coronafaciens</i> pv. <i>garcae</i> | hypothetical protein ALO77_200057 [Pseudomonas coronafaciens pv. garcae]. | GCA_001400345.1 |
| KQY48570.1   | nSTAND2+wHTH+TPRs+HEPN*→                                    | nSTAND2+wHTH+TPRs+HEPN | 547 | ASD32_09250  | Alphaproteobacteria | <i>Rhizobium</i> sp. Root483D2                     | hypothetical protein ASD32_09250 [Rhizobium sp. Root483D2].               | GCA_001426685.1 |
| KYF49123.1   | ??+STAND+wHTH→ nSTAND2+wHTH+TPRs+HEPN*→                     | nSTAND2+wHTH+TPRs+HEPN | 636 | BE08_43115   | Deltaproteobacteria | <i>Sorangium cellulosum</i>                        | hypothetical protein BE08_43115 [Sorangium cellulosum].                   | GCA_001589265.1 |
| MBA3548110.1 | ??+STAND+wHTH→ nSTAND2+wHTH+TPRs+HEPN*→ Integrin_beta(vWA)→ | nSTAND2+wHTH+TPRs+HEPN | 632 | H0T76_16635  | Deltaproteobacteria | <i>Nannocystis</i> sp.                             | hypothetical protein H0T76_16635 [Nannocystis sp.].                       | GCA_013812955.1 |
| OJX80461.1   | nSTAND2+wHTH+TPRs+HEPN*→  <-??                              | nSTAND2+wHTH+TPRs+HEPN | 533 | BGO93_00115  | Alphaproteobacteria | <i>Mesorhizobium</i> sp. 65-26                     | hypothetical protein BGO93_00115 [Mesorhizobium sp. 65-26].               | GCA_001899205.1 |
| PMZ92294.1   | ??+STAND+wHTH→ nSTAND2+wHTH+TPRs+HEPN*→ PSE→??→             | nSTAND2+wHTH+TPRs+HEPN | 621 | C1X61_03125  | Gammaproteobacteria | <i>Pseudomonas</i> sp. FW215-T2                    | hypothetical protein C1X61_03125 [Pseudomonas sp. FW215-T2].              | GCA_002883935.1 |
| POD52929.1   | ??+STAND+wHTH→ nSTAND2+wHTH+TPRs+HEPN*→                     | nSTAND2+wHTH+TPRs+HEPN | 590 | BKM15_13675  | Gammaproteobacteria | <i>Pseudomonas syringae</i> pv. <i>syringae</i>    | hypothetical protein BKM15_13675 [Pseudomonas syringae pv. syringae].     | GCA_002905935.1 |
| PWI54427.1   | nSTAND2+wHTH+TPRs+HEPN*→                                    | nSTAND2+wHTH+TPRs+HEPN | 532 | B5K03_09585  | Alphaproteobacteria | <i>Rhizobium phaseoli</i>                          | hypothetical protein B5K03_09585 [Rhizobium phaseoli].                    | GCA_003150695.1 |
| PZX00307.1   | ??+STAND+wHTH→ nSTAND2+wHTH+TPRs+HEPN*→                     | nSTAND2+wHTH+TPRs+HEPN | 621 | DFS28_10221  | Gammaproteobacteria | <i>Pseudomonas</i> sp. 478                         | hypothetical protein DFS28_10221 [Pseudomonas sp. 478].                   | GCA_003254125.1 |
| RCM87736.1   | ??+STAND+wHTH→ nSTAND2+wHTH+TPRs+HEPN*→                     | nSTAND2+wHTH+TPRs+HEPN | 588 | PA57_04301   | Gammaproteobacteria | <i>Pseudomonas aeruginosa</i>                      | hypothetical protein PA57_04301 [Pseudomonas aeruginosa].                 | GCA_003332525.1 |
| RMG61681.1   | Membrane-bound-b-barrel→ STAND+wHTH*→ Pkinase+cNMP_cyclase→ | STAND+wHTH             | 408 | D6715_13175  | Calditrichaeota     | <i>Calditrichaeota bacterium</i>                   | ATP-binding protein [Calditrichaeota bacterium].                          | GCA_003696445.1 |
| RMS07982.1   | ??+STAND+wHTH→ nSTAND2+wHTH+TPRs+HEPN*→                     | nSTAND2+wHTH+TPRs+HEPN | 621 | ALP73_02675  | Gammaproteobacteria | <i>Pseudomonas coronafaciens</i> pv. <i>garcae</i> | hypothetical protein ALP73_02675 [Pseudomonas coronafaciens pv. garcae].  | GCA_003701555.1 |
| RWN51709.1   | ??+STAND+wHTH→ nSTAND2+wHTH+TPRs+HEPN*→                     | nSTAND2+wHTH+TPRs+HEPN | 599 | EOR98_25445  | Alphaproteobacteria | <i>Mesorhizobium</i> sp.                           | hypothetical protein EOR98_25445 [Mesorhizobium sp.].                     | GCA_004020775.1 |
| RYG89382.1   | ??→??+STAND+wHTH→ nSTAND2+wHTH+TPRs+HEPN*→                  | nSTAND2+wHTH+TPRs+HEPN | 629 | EON59_01575  | Alphaproteobacteria | Alphaproteobacteria bacterium                      | hypothetical protein EON59_01575 [Alphaproteobacteria bacterium].         | GCA_004145145.1 |
| TIN07909.1   | ??+STAND+wHTH→ nSTAND2+wHTH+TPRs+HEPN*→                     | nSTAND2+wHTH+TPRs+HEPN | 599 | E5Y14_22895  | Alphaproteobacteria | <i>Mesorhizobium</i> sp.                           | hypothetical protein E5Y14_22895 [Mesorhizobium sp.].                     | GCA_004961475.1 |
| TIT02463.1   | ??+STAND+wHTH→ nSTAND2+wHTH+TPRs+HEPN*→                     | nSTAND2+wHTH+TPRs+HEPN | 596 | E5W87_09945  | Alphaproteobacteria | <i>Mesorhizobium</i> sp.                           | hypothetical protein E5W87_09945 [Mesorhizobium sp.].                     | GCA_004962925.1 |

| acc            | operon                                                                        | architecture           | len | gen.name    | taxend              | species                    | define                                                             | gca             |
|----------------|-------------------------------------------------------------------------------|------------------------|-----|-------------|---------------------|----------------------------|--------------------------------------------------------------------|-----------------|
| TJV17958.1     | ??+STAND+wHTH→ nSTAND2+wHTH+TPRs+HEPN*→                                       | nSTAND2+wHTH+TPRs+HEPN | 626 | E5Y07_09865 | Alphaproteobacteria | Mesorhizobium sp.          | hypothetical protein E5Y07_09865 [Mesorhizobium sp.].              | GCA_005046125.1 |
| WP_008322742.1 | ??+STAND+wHTH→ nSTAND2+wHTH+TPRs+HEPN*→  <-??                                 | nSTAND2+wHTH+TPRs+HEPN | 613 | -           | Gammaproteobacteria | Enterobacteriaceae         | MULTISPECIES: hypothetical protein [Enterobacteriaceae].           | GCF_000277565.1 |
| WP_026230868.1 | ??+STAND+wHTH→ nSTAND2+wHTH+TPRs+HEPN*→ SF2-helicase+DEAD_assoc→ Calcineurin→ | nSTAND2+wHTH+TPRs+HEPN | 637 | -           | Alphaproteobacteria | Rhizobium                  | MULTISPECIES: hypothetical protein [Rhizobium].                    | GCF_014138515.1 |
| WP_027196515.1 | ??+STAND→ nSTAND2+wHTH+GT4*→                                                  | nSTAND2+wHTH+GT4       | 760 | -           | Betaproteobacteria  | Paraburkholderia sprentiae | glycosyltransferase family 4 protein [Paraburkholderia sprentiae]. | GCF_001865575.1 |
| WP_048993481.1 | ??+STAND+wHTH→ nSTAND2+wHTH+TPRs+HEPN*→  <-??                                 | nSTAND2+wHTH+TPRs+HEPN | 613 | -           | Gammaproteobacteria | Klebsiella pneumoniae      | hypothetical protein [Klebsiella pneumoniae].                      | GCF_001065235.1 |
| WP_072160039.1 | nSTAND2+wHTH+TPRs+HEPN*→                                                      | nSTAND2+wHTH+TPRs+HEPN | 613 | -           | Gammaproteobacteria | Pluralibacter gergoviae    | hypothetical protein [Pluralibacter gergoviae].                    | GCF_001276415.1 |
| WP_088567149.1 | ??+STAND+wHTH→ nSTAND2+wHTH+TPRs+HEPN*→  <-??                                 | nSTAND2+wHTH+TPRs+HEPN | 613 | -           | Gammaproteobacteria | Enterobacter hormaechei    | hypothetical protein [Enterobacter hormaechei].                    | GCF_002208275.1 |
| WP_089463191.1 | ??+STAND→ nSTAND2+wHTH+GT4*→                                                  | nSTAND2+wHTH+GT4       | 768 | -           | Betaproteobacteria  | Burkholderia               | MULTISPECIES: glycosyltransferase [Burkholderia].                  | GCF_002924455.1 |
| WP_094198012.1 | ??+STAND→ nSTAND2+wHTH+GT4*→                                                  | nSTAND2+wHTH+GT4       | 756 | -           | Betaproteobacteria  | Alcaligenes faecalis       | glycosyltransferase family 4 protein [Alcaligenes faecalis].       | GCF_002242175.1 |
| WP_097401548.1 | nSTAND2+wHTH+TPRs+HEPN*→  <-??                                                | nSTAND2+wHTH+TPRs+HEPN | 613 | -           | Gammaproteobacteria | Enterobacteriaceae         | MULTISPECIES: hypothetical protein [Enterobacteriaceae].           | GCF_002510255.1 |
| WP_106119969.1 | ??+STAND→ nSTAND2+wHTH+GT4*→                                                  | nSTAND2+wHTH+GT4       | 736 | -           | Gammaproteobacteria | Pseudomonas simiae         | glycosyltransferase family 4 protein [Pseudomonas simiae].         | GCF_003001535.1 |
| WP_107112219.1 | ??+STAND+wHTH→ nSTAND2+wHTH+TPRs+HEPN*→  <-??                                 | nSTAND2+wHTH+TPRs+HEPN | 613 | -           | Gammaproteobacteria | Klebsiella quasipneumoniae | hypothetical protein [Klebsiella quasipneumoniae].                 | GCF_002854535.1 |
| WP_116343459.1 | ??+STAND+wHTH→ nSTAND2+wHTH+TPRs+HEPN*→  <-??                                 | nSTAND2+wHTH+TPRs+HEPN | 613 | -           | Gammaproteobacteria | Enterobacter cloacae       | hypothetical protein [Enterobacter cloacae].                       | GCF_003401145.1 |
| WP_122437975.1 | ??+STAND+wHTH→ nSTAND2+wHTH+TPRs+HEPN*→                                       | nSTAND2+wHTH+TPRs+HEPN | 621 | -           | Gammaproteobacteria | Pseudomonas viridiflava    | hypothetical protein [Pseudomonas viridiflava].                    | GCF_900580835.1 |
| WP_124434788.1 | ??+STAND+wHTH→ nSTAND2+wHTH+TPRs+HEPN*→                                       | nSTAND2+wHTH+TPRs+HEPN | 598 | -           | Gammaproteobacteria | Pseudomonas sp. R11-23-07  | hypothetical protein [Pseudomonas sp. R11-23-07].                  | GCF_003852295.1 |
| WP_127426060.1 | ??+STAND+wHTH→ nSTAND2+wHTH+TPRs+HEPN*→                                       | nSTAND2+wHTH+TPRs+HEPN | 606 | -           | Alphaproteobacteria | unclassified Mesorhizobium | MULTISPECIES: hypothetical protein [unclassified Mesorhizobium].   | GCF_004021725.2 |
| WP_132834030.1 | ??+STAND+wHTH→ nSTAND2+wHTH+TPRs+HEPN*→                                       | nSTAND2+wHTH+TPRs+HEPN | 598 | -           | Gammaproteobacteria | unclassified Pseudomonas   | MULTISPECIES: hypothetical protein [unclassified Pseudomonas].     | GCF_003254125.1 |
| WP_134049903.1 | ??+STAND+wHTH→ nSTAND2+wHTH+TPRs+HEPN*→                                       | nSTAND2+wHTH+TPRs+HEPN | 621 | -           | Gammaproteobacteria | Pseudomonas sp. OV144      | hypothetical protein [Pseudomonas sp. OV144].                      | GCF_004368835.1 |
| WP_139645958.1 | ??+STAND+wHTH→ nSTAND2+wHTH+TPRs+HEPN*→                                       | nSTAND2+wHTH+TPRs+HEPN | 623 | -           | Gammaproteobacteria | Pseudomonas sp. ICMP22404  | hypothetical protein [Pseudomonas sp. ICMP22404].                  | GCF_006227205.1 |
| WP_145962680.1 | ??+STAND+wHTH→ nSTAND2+wHTH+TPRs+HEPN*→                                       | nSTAND2+wHTH+TPRs+HEPN | 592 | -           | Alphaproteobacteria | Rhizobium phaseoli         | hypothetical protein [Rhizobium phaseoli].                         | GCF_003150695.1 |
| WP_146023689.1 | ??+STAND+wHTH→ nSTAND2+wHTH+TPRs+HEPN*→ PSE→??→                               | nSTAND2+wHTH+TPRs+HEPN | 598 | -           | Gammaproteobacteria | unclassified Pseudomonas   | MULTISPECIES: hypothetical protein [unclassified Pseudomonas].     | GCF_002884305.1 |
| WP_147262087.1 | ??+STAND+wHTH→ nSTAND2+wHTH+TPRs+HEPN*→                                       | nSTAND2+wHTH+TPRs+HEPN | 612 | -           | Gammaproteobacteria | Pseudomonas aeruginosa     | hypothetical protein [Pseudomonas aeruginosa].                     | GCF_003332525.1 |
| WP_147467220.1 | nSTAND2+wHTH+TPRs+HEPN*→                                                      | nSTAND2+wHTH+TPRs+HEPN | 486 | -           | Gammaproteobacteria | Pseudomonas coronafaciens  | hypothetical protein [Pseudomonas coronafaciens].                  | GCF_003700475.1 |
| WP_147475620.1 | nSTAND2+wHTH+TPRs+HEPN*→                                                      | nSTAND2+wHTH+TPRs+HEPN | 486 | -           | Gammaproteobacteria | Pseudomonas coronafaciens  | hypothetical protein [Pseudomonas coronafaciens].                  | GCF_001400345.1 |
| WP_153438665.1 | ??+STAND+wHTH→ nSTAND2+wHTH+TPRs+HEPN*→                                       | nSTAND2+wHTH+TPRs+HEPN | 620 | -           | Gammaproteobacteria | Pseudomonas helleri        | hypothetical protein [Pseudomonas helleri].                        | GCF_009600265.1 |
| WP_156383024.1 | ??→ STAND+wHTH→ nSTAND2+wHTH+TPRs+HEPN*→                                      | nSTAND2+wHTH+TPRs+HEPN | 602 | -           | Alphaproteobacteria | Rhizobium sp. Root483D2    | hypothetical protein [Rhizobium sp. Root483D2].                    | GCF_001426685.1 |

| acc            | operon                                  | architecture           | len | gen.name | taxend              | species                   | define                                                  | gca             |
|----------------|-----------------------------------------|------------------------|-----|----------|---------------------|---------------------------|---------------------------------------------------------|-----------------|
| WP_160320279.1 | nSTAND2(fragment)*→                     | nSTAND2(fragment)      | 113 | -        | Alphaproteobacteria | Rhizobium ecuadorensis    | hypothetical protein, partial [Rhizobium ecuadorensis]. | GCF_001187535.1 |
| WP_160610812.1 | ??+STAND+wHTH→ nSTAND2+wHTH+TPRs+HEPN*→ | nSTAND2+wHTH+TPRs+HEPN | 640 | -        | Alphaproteobacteria | Altererythrobacter aerius | hypothetical protein [Altererythrobacter aerius].       | GCF_009827495.1 |
| WP_163011207.1 | ??+STAND+wHTH→ nSTAND2+wHTH+TPRs+HEPN*→ | nSTAND2+wHTH+TPRs+HEPN | 621 | -        | Gammaproteobacteria | Pseudomonas viridiflava   | hypothetical protein [Pseudomonas viridiflava].         | GCF_900582025.1 |
| WP_163014645.1 | nSTAND2+wHTH+TPRs+HEPN*→                | nSTAND2+wHTH+TPRs+HEPN | 560 | -        | Gammaproteobacteria | Pseudomonas viridiflava   | hypothetical protein [Pseudomonas viridiflava].         | GCF_900582435.1 |
| WP_164708313.1 | nSTAND2+wHTH+TPRs+HEPN*→                | nSTAND2+wHTH+TPRs+HEPN | 534 | -        | Gammaproteobacteria | Pseudomonas viridiflava   | hypothetical protein [Pseudomonas viridiflava].         | GCF_900602385.1 |
| WP_169852212.1 | ??+STAND+wHTH→ nSTAND2+wHTH+TPRs+HEPN*→ | nSTAND2+wHTH+TPRs+HEPN | 623 | -        | Gammaproteobacteria | Pseudomonas proteolytica  | hypothetical protein [Pseudomonas proteolytica].        | GCF_012985975.1 |

Gene neighborhoods and domain architectures of prokaryotic AP-GTPases described in the text

| acc        | operon                                                                                                                            | architecture                        | len  | gen.name       | taxend              | species                              | define                                                                       | gca             |
|------------|-----------------------------------------------------------------------------------------------------------------------------------|-------------------------------------|------|----------------|---------------------|--------------------------------------|------------------------------------------------------------------------------|-----------------|
| AAU84033.1 | pc1599→ Cluster1746_2clades→ Calcineurin→  <-tRNA  LRR-repeats+AP-GTPase+COR+TM+TM*→?→?→                                          | LRR-repeats+AP-GTPase+COR+TM+TM     | 737  | GZ35D7_19      | Archaea             | uncultured archaeon                  | leucine-rich-repeat protein                                                  | -               |
| AAX07516.1 | Aminotran_1_2→  <-?<-?<-?  Cluster1483_2clades→<br>LRR-repeats+AP-GTPase+COR*→                                                    | LRR-repeats+AP-GTPase+COR           | 1016 | -              | Planctomycetes      | GZfos35D7<br>Gemmata sp. Wa1-1       | [uncultured archaeon GZfos35D7].<br>GTP-binding protein [Gemmata sp. Wa1-1]. | -               |
| ABD75797.1 | HISKIN→ LRR-repeats+AP-GTPase+COR+EAD8*→ HISKIN→?→  <-?  Cluster1512_2clades→ TetR-HTH→?→ Ferredoxin-RRM→                         | LRR-repeats+AP-GTPase+COR+EAD8      | 847  | -              | Bacteria            | uncultured bacterium                 | hypothetical protein [uncultured bacterium].                                 | -               |
| ACC84329.1 | <-Arginase<-?<-?<-?  LRR-repeats+AP-GTPase+COR+TIR*→                                                                              | LRR-repeats+AP-GTPase+COR+TIR       | 1109 | Npun_F6039     | Cyanobacteria       | Nostoc punctiforme PCC 73102         | Miro domain protein [Nostoc punctiforme PCC 73102].                          | GCA_000020025.1 |
| ADB42932.1 | SIG+TM+TM+TM+HISKIN→?→  <-?  CENPB→?→ Cluster2094_2clades→<br>LRR-repeats+AP-GTPase+COR*→  <-?<-?<-?<-?<-?  ParA-Soj-PloopNTPase→ | LRR-repeats+AP-GTPase+COR           | 925  | Slin_6989      | Bacteroidetes       | Spirosoma linguale DSM 74            | small GTP-binding protein (plasmid) [Spirosoma linguale DSM 74].             | GCA_000024525.1 |
| AEE53900.1 | 35exo→  <-?<-?  ?→?→?→ LRR-repeats+AP-GTPase+COR+TIR*→  <-?<-?<-ABC-ATPase+APATPase+ABC-ATPase<-?  SIGMA-HTH→                     | LRR-repeats+AP-GTPase+COR+TIR       | 998  | Halhy_6078     | Bacteroidetes       | Haliscomenobacter hydrossis DSM 1100 | small GTP-binding protein [Haliscomenobacter hydrossis DSM 1100].            | GCA_000212735.1 |
| AEE54359.1 | LRR-repeats+AP-GTPase+COR+TIR*→ LRR-repeats+AP-GTPase+COR→ LRR-repeats+AP-GTPase+COR→                                             | LRR-repeats+AP-GTPase+COR+TIR       | 1058 | Halhy_6543     | Bacteroidetes       | Haliscomenobacter hydrossis DSM 1100 | Miro domain protein [Haliscomenobacter hydrossis DSM 1100].                  | GCA_000212735.1 |
| AEE54482.1 | LRR-repeats+AP-GTPase+COR+EAD11*→                                                                                                 | LRR-repeats+AP-GTPase+COR+EAD11     | 1141 | Halhy_6666     | Bacteroidetes       | Haliscomenobacter hydrossis DSM 1100 | small GTP-binding protein (plasmid) [Haliscomenobacter hydrossis DSM 1100].  | GCA_000212735.1 |
| AEE54508.1 | MACRODOMAIN→?→ LRR-repeats+AP-GTPase+COR+EAD11*→                                                                                  | LRR-repeats+AP-GTPase+COR+EAD11     | 1023 | Halhy_6692     | Bacteroidetes       | Haliscomenobacter hydrossis DSM 1100 | Miro domain protein (plasmid) [Haliscomenobacter hydrossis DSM 1100].        | GCA_000212735.1 |
| AFY40133.1 | <-SIG+Trypsin+PDZ<-?  ?→?→ LRR-repeats+AP-GTPase+COR+TCAD2*→                                                                      | LRR-repeats+AP-GTPase+COR+TCAD2     | 918  | Lepto7376_3994 | Cyanobacteria       | Leptolyngbya sp. PCC 7376            | small GTP-binding protein [Leptolyngbya sp. PCC 7376].                       | GCA_000316605.1 |
| AFY57475.1 | EACC2+CASPASE+LRR-repeats+AP-GTPase*→ AP-GTPase+COR→                                                                              | EACC2+CASPASE+LRR-repeats+AP-GTPase | 982  | Riv7116_5077   | Cyanobacteria       | Rivularia sp. PCC 7116               | leucine-rich repeat (LRR) protein [Rivularia sp. PCC 7116].                  | GCA_000316665.1 |
| AKB24843.1 | <-HhH-RADC+JAB  ?→ NTP_transf_3→ LRR-repeats+AP-GTPase+COR→?→ LRR-repeats+AP-GTPase+COR*→                                         | LRR-repeats+AP-GTPase+COR           | 599  | MSMTP_1374     | Euryarchaeota       | Methanosarcina sp. MTP4              | E3 ubiquitin-protein ligase SspH2 [Methanosarcina sp. MTP4].                 | GCA_000970045.1 |
| AKB47719.1 | LRR-repeats→ LRR-repeats+AP-GTPase+COR+TIR*→?→?→?→?→?→  <-TPR-repeats                                                             | LRR-repeats+AP-GTPase+COR+TIR       | 590  | MSKOL_1942     | Euryarchaeota       | Methanosarcina sp. Kolksee           | hypothetical protein MSKOL_1942 [Methanosarcina sp. Kolksee].                | GCA_000969945.1 |
| AKB51553.1 | LRR-repeats+AP-GTPase+COR*→                                                                                                       | LRR-repeats+AP-GTPase+COR           | 880  | MSBRW_2300     | Euryarchaeota       | Methanosarcina barkeri str. Wiesmoor | hypothetical protein MSBRW_2300 [Methanosarcina barkeri str. Wiesmoor].      | GCA_000969985.1 |
| AKB56819.1 | <-SIG+TPR+TPR+TPR+TPR+TPR+TPR  ?→  <-?  ?→?→?→?→ LRR-repeats+AP-GTPase+COR*→?→?→ PRTase→                                          | LRR-repeats+AP-GTPase+COR           | 880  | MSBR2_0303     | Euryarchaeota       | Methanosarcina barkeri 227           | hypothetical protein MSBR2_0303 [Methanosarcina barkeri 227].                | GCA_000970065.1 |
| AKJ07375.1 | Cluster971_2clades→?→  <-?<-?  LRR-repeats+AP-GTPase+COR+TIR*→?→  <-?<-?<-?  ?→  <-?<-SIG+Lysozyme                                | LRR-repeats+AP-GTPase+COR+TIR       | 873  | AA314_09001    | Deltaproteobacteria | Archangium gephyra                   | Chaperone protein DnaK [Archangium gephyra].                                 | GCA_001027285.1 |
| AOY82617.1 | REC→  <-?<-HNH  REC→  <-TPR-repeats<-?  LRR-repeats→ LRR-repeats+AP-GTPase+COR*→ AP-GTPase+COR+TM+TM→                             | LRR-repeats+AP-GTPase+COR           | 252  | BJP36_24575    | Cyanobacteria       | Moorea producens JHB                 | hypothetical protein BJP36_24575 [Moorea producens JHB].                     | GCA_001854205.1 |
| AQR64774.1 | LRR-repeats+AP-GTPase+COR+TIR*→  <-?<-?<-MarR-HTH  ?→  <-MarR-HTH<-?  Thioredoxin→                                                | LRR-repeats+AP-GTPase+COR+TIR       | 1295 | BXU06_06620    | Betaproteobacteria  | Aquaspirillum sp. LM1                | hypothetical protein BXU06_06620 [Aquaspirillum sp. LM1].                    | GCA_002002905.1 |



| acc        | operon                                                                        | architecture                      | len  | gen.name         | taxend                          | species                                                | define                                                                                                                                               | gca             |
|------------|-------------------------------------------------------------------------------|-----------------------------------|------|------------------|---------------------------------|--------------------------------------------------------|------------------------------------------------------------------------------------------------------------------------------------------------------|-----------------|
| CCH96195.1 | LRR-repeats+AP-GTPase+COR+TM+TM*→                                             | LRR-repeats+AP-GTPase+COR+TM+TM   | 625  | MICAB_1690001    | Cyanobacteria                   | Microcystis aeruginosa PCC 9717                        | Leucine-rich-repeat protein (fragment) [Microcystis aeruginosa PCC 9717].                                                                            | GCA_000312165.1 |
| CCI18671.1 | LRR-repeats+AP-GTPase+COR*→ AP-GTPase+COR+TM+TM→                              | LRR-repeats+AP-GTPase+COR         | 302  | MICAF_4270008    | Cyanobacteria                   | Microcystis aeruginosa PCC 9807                        | Leucine-rich-repeat protein (fragment) [Microcystis aeruginosa PCC 9807].                                                                            | GCA_000312225.1 |
| CCQ52177.1 | LRR-repeats+AP-GTPase+COR*→                                                   | LRR-repeats+AP-GTPase+COR         | 620  | CWATWH8502_1464  | Cyanobacteria                   | Crocospaera watsonii WH 8502                           | Leucine-rich repeat [Crocospaera watsonii WH 8502].                                                                                                  | GCA_001039555.1 |
| CCQ56427.1 | LRR-repeats+AP-GTPase+COR*→  <-?<-?<-?  RelE→ CHTH→                           | LRR-repeats+AP-GTPase+COR         | 761  | CWATWH0005_5558  | Cyanobacteria                   | Crocospaera watsonii WH 0005                           | Leucine-rich repeat [Crocospaera watsonii WH 0005].                                                                                                  | GCA_001050835.1 |
| CCQ61794.1 | LRR-repeats+AP-GTPase+COR*→  <-?<-?  RelE→ CHTH→                              | LRR-repeats+AP-GTPase+COR         | 674  | CWATWH0401_3405  | Cyanobacteria                   | Crocospaera watsonii WH 0401                           | Leucine-rich repeat [Crocospaera watsonii WH 0401].                                                                                                  | GCA_001039615.1 |
| CCQ66314.1 | LRR-repeats+AP-GTPase+COR*→                                                   | LRR-repeats+AP-GTPase+COR         | 378  | CWATWH0402_4408  | Cyanobacteria                   | Crocospaera watsonii WH 0402                           | Leucine-rich repeat [Crocospaera watsonii WH 0402].                                                                                                  | GCA_001039635.1 |
| CDA78514.1 | LRR-repeats+AP-GTPase+COR*→                                                   | LRR-repeats+AP-GTPase+COR         | 1064 | BN558_01944      | Firmicutes                      | Clostridium sp. CAG:242                                | miro domain protein [Clostridium sp. CAG:242].                                                                                                       | GCA_000435455.1 |
| CDU15633.1 | LRR-repeats+AP-GTPase+COR*→                                                   | LRR-repeats+AP-GTPase+COR         | 1092 | VCR17J2_90139    | Gammaproteobacteria             | Vibrio sp. J2-17                                       | hypothetical protein VCR17J2_90139 [Vibrio sp. J2-17].                                                                                               | GCA_001244075.1 |
| CRH07284.1 | LRR-repeats+AP-GTPase+COR*→  <-?  ?→?→  <-?<-SIG+Lysozyme                     | LRR-repeats+AP-GTPase+COR         | 759  | MAGMO_3143       | Alphaproteobacteria             | Candidatus Magnetococcus massalia                      | Conserved protein of unknown function. Containing small GTP-binding domain and Leucine-rich repeat (LRR) domain [Candidatus Magnetococcus massalia]. | -               |
| EAM49963.1 | Cluster1136_2clades→?→  <-?  LRR-repeats→ LRR-repeats+AP-GTPase+COR*→         | LRR-repeats+AP-GTPase+COR         | 715  | CwatDRAFT_2830   | Cyanobacteria                   | Crocospaera watsonii WH 8501                           | Leucine-rich repeat [Crocospaera watsonii WH 8501].                                                                                                  | GCA_000167195.1 |
| EAY30117.1 | LRR-repeats→?→ LRR-repeats+AP-GTPase+COR*→                                    | LRR-repeats+AP-GTPase+COR         | 1165 | M23134_05450     | Bacteroidetes                   | Microscilla marina ATCC 23134                          | Rab family protein [Microscilla marina ATCC 23134].                                                                                                  | GCA_000169175.1 |
| EDN67620.1 | LRR-repeats+AP-GTPase+COR*→                                                   | LRR-repeats+AP-GTPase+COR         | 602  | BGP_2058         | Gammaproteobacteria             | Beggiatoa sp. PS                                       | leucine-rich-repeat protein [Beggiatoa sp. PS].                                                                                                      | GCA_000170715.1 |
| EDN68964.1 | LRR-repeats+AP-GTPase+COR*→                                                   | LRR-repeats+AP-GTPase+COR         | 833  | BGP_3136         | Gammaproteobacteria             | Beggiatoa sp. PS                                       | leucine-rich-repeat protein [Beggiatoa sp. PS].                                                                                                      | GCA_000170715.1 |
| EDX78020.1 | Cluster1415_2clades→?→  <-?  LRR-repeats→ LRR-repeats+AP-GTPase+COR+DUF4404*→ | LRR-repeats+AP-GTPase+COR+DUF4404 | 1115 | MC7420_7758      | Cyanobacteria                   | Coleofasciculus chthonoplastes PCC 7420                | Ras family, putative [Coleofasciculus chthonoplastes PCC 7420].                                                                                      | GCA_000155555.1 |
| EHJ11819.1 | LRR-repeats+AP-GTPase+COR*→  <-?<-?  RelE→ CHTH→                              | LRR-repeats+AP-GTPase+COR         | 674  | CWATWH0003_3458  | Cyanobacteria                   | Crocospaera watsonii WH 0003                           | Leucine-rich repeat [Crocospaera watsonii WH 0003].                                                                                                  | GCA_000235665.2 |
| EIG53576.1 | LRR-repeats+AP-GTPase+COR*→?→?→?→ Cluster1496_2clades→                        | LRR-repeats+AP-GTPase+COR         | 1279 | DesU5LDRAFT_1901 | Deltaproteobacteria             | Desulfovibrio sp. U5L                                  | small GTP-binding protein domain [Desulfovibrio sp. U5L].                                                                                            | GCA_000245055.1 |
| ESA34932.1 | LRR-repeats+AP-GTPase+COR+TM+TM*→                                             | LRR-repeats+AP-GTPase+COR+TM+TM   | 1002 | N836_14320       | Cyanobacteria                   | Leptolyngbya sp. Heron Island J                        | small gtp-binding protein [Leptolyngbya sp. Heron Island J].                                                                                         | GCA_000482245.1 |
| ESA35951.1 | <-NACHT<-?  LRR-repeats+AP-GTPase+COR+TIR*→                                   | LRR-repeats+AP-GTPase+COR+TIR     | 824  | N836_09535       | Cyanobacteria                   | Leptolyngbya sp. Heron Island J                        | small gtp-binding protein [Leptolyngbya sp. Heron Island J].                                                                                         | GCA_000482245.1 |
| ESA37051.1 | LRR-repeats+AP-GTPase+COR*→?→?→?→  <-Pentapeptide-repeats                     | LRR-repeats+AP-GTPase+COR         | 818  | N836_04700       | Cyanobacteria                   | Leptolyngbya sp. Heron Island J                        | small gtp-binding protein [Leptolyngbya sp. Heron Island J].                                                                                         | GCA_000482245.1 |
| ESQ09086.1 | LRR-repeats+AP-GTPase+COR+TIR*→                                               | LRR-repeats+AP-GTPase+COR+TIR     | 840  | N838_02740       | Gammaproteobacteria             | Thiohalocapsa sp. PB-PSB1                              | hypothetical protein N838_02740 [Thiohalocapsa sp. PB-PSB1].                                                                                         | GCA_000495615.1 |
| ETR72570.1 | Cluster1438_2clades→?→ LRR-repeats+AP-GTPase+COR+TIR*→ CCTBP→  <-REC          | LRR-repeats+AP-GTPase+COR+TIR     | 808  | OMM_01620        | Deltaproteobacteria             | Candidatus Magnetoglobus multicellularis str. Araruama | leucine-rich repeat-containing protein [Candidatus Magnetoglobus multicellularis str. Araruama].                                                     | GCA_000516475.1 |
| ETW97925.1 | LRR-repeats+AP-GTPase+COR+DUF4404*→?→  <-RNA-Helicase  ?→ SIG+BLBD→           | LRR-repeats+AP-GTPase+COR+DUF4404 | 767  | ETSY1_20835      | Nitrospinae/Tectomicrobia group | Candidatus Entotheonella factor                        | hypothetical protein ETSY1_20835, partial [Candidatus Entotheonella factor].                                                                         | GCA_000522425.1 |

| acc        | operon                                                                                                                                                             | architecture                    | len  | gen.name          | taxend                          | species                               | define                                                                                  | gca             |
|------------|--------------------------------------------------------------------------------------------------------------------------------------------------------------------|---------------------------------|------|-------------------|---------------------------------|---------------------------------------|-----------------------------------------------------------------------------------------|-----------------|
| ETX07308.1 | LRR-repeats+AP-GTPase+COR*→                                                                                                                                        | LRR-repeats+AP-GTPase+COR       | 513  | ETSY2_11950       | Nitrospinae/Tectomicrobia group | Candidatus Entotheonella gemina       | hypothetical protein ETSY2_11950, partial [Candidatus Entotheonella gemina].            | GCA_000522445.1 |
| GAK50293.1 | <-CR-REase5<-?<-Cluster1448_2clades<-Cluster1281_2clades  ?→ LRR-repeats+AP-GTPase*→ COR→                                                                          | LRR-repeats+AP-GTPase           | 420  | U14_01521         | Bacteria                        | Candidatus Moduliflexus flocculans    | leucine-rich-repeat protein [Candidatus Moduliflexus flocculans].                       | GCA_000739515.1 |
| GBE92899.1 | HISKIN→  <-?  ?→ LRR-repeats+AP-GTPase+COR*→                                                                                                                       | LRR-repeats+AP-GTPase+COR       | 946  | NCWK1_2658        | Cyanobacteria                   | Nostoc cycadae WK-1                   | leucine rich repeat (LRR)-containing protein [Nostoc cycadae WK-1].                     | GCA_002897135.1 |
| GCL40268.1 | LRR-repeats+AP-GTPase+COR*→                                                                                                                                        | LRR-repeats+AP-GTPase+COR       | 261  | SR1949_54040      | Cyanobacteria                   | Sphaerospermopsis reniformis          | small GTP-binding protein [Sphaerospermopsis reniformis].                               | GCA_005402885.1 |
| GEP41915.1 | SIG+TM→?→ LRR-repeats+AP-GTPase+COR*→                                                                                                                              | LRR-repeats+AP-GTPase+COR       | 809  | BGE01nite_12060   | Verrucomicrobia                 | Brevifollis gellanilyticus            | hypothetical protein BGE01nite_12060 [Brevifollis gellanilyticus].                      | GCA_007992435.1 |
| GFZ95281.1 | LRR-repeats+AP-GTPase+COR*→                                                                                                                                        | LRR-repeats+AP-GTPase+COR       | 911  | CYANOKiyG1_06360  | Cyanobacteria                   | Okeania sp. KiyG1                     | hypothetical protein CYANOKiyG1_06360 [Okeania sp. KiyG1].                              | GCA_014132355.1 |
| GFZ95952.1 | <-HhH-RADC+JAB<-?  LRR-repeats+AP-GTPase+COR*→                                                                                                                     | LRR-repeats+AP-GTPase+COR       | 747  | CYANOKiyG1_07050  | Cyanobacteria                   | Okeania sp. KiyG1                     | hypothetical protein CYANOKiyG1_07050 [Okeania sp. KiyG1].                              | GCA_014132355.1 |
| GGA29094.1 | <-RADICAL-SAM  ?→ REC→?→ LRR-repeats+AP-GTPase+COR*→  <-?<-NACHT+68TM-wHTH<-?  ?→  <-TPR-repeats<-HISKIN                                                           | LRR-repeats+AP-GTPase+COR       | 1395 | CYANOKiyG1_45460  | Cyanobacteria                   | Okeania sp. KiyG1                     | hypothetical protein CYANOKiyG1_45460 [Okeania sp. KiyG1].                              | GCA_014132355.1 |
| GGA48436.1 | LRR-repeats+AP-GTPase+COR*→?→ COR+TM+TM→  <-?<-?<-NUDIX  TPR-repeats→                                                                                              | LRR-repeats+AP-GTPase+COR       | 405  | CYANOKiyG1_67520  | Cyanobacteria                   | Okeania sp. KiyG1                     | hypothetical protein CYANOKiyG1_67520 [Okeania sp. KiyG1].                              | GCA_014132355.1 |
| GGD73013.1 | LRR-repeats+AP-GTPase+COR+TM+TM*→?→?→  <-?<-Cluster1601_2clades                                                                                                    | LRR-repeats+AP-GTPase+COR+TM+TM | 937  | GCM10011514_41350 | Bacteroidetes                   | Emticicia aquatilis                   | hypothetical protein GCM10011514_41350 [Emticicia aquatilis].                           | GCA_014644295.1 |
| GGU83059.1 | LRR-repeats+AP-GTPase+COR*→  <-?  ?→  <-?<-SIGMA-HTH<-?<-SIGMA-HTH                                                                                                 | LRR-repeats+AP-GTPase+COR       | 996  | GCM10010260_14720 | Actinobacteria                  | Streptomyces filipinensis             | hypothetical protein GCM10010260_14720 [Streptomyces filipinensis].                     | GCA_014649495.1 |
| HAA21349.1 | LRR-repeats+AP-GTPase+COR*→                                                                                                                                        | LRR-repeats+AP-GTPase+COR       | 805  | DCP28_22240       | Bacteroidetes                   | Cytophagales bacterium                | TPA: hypothetical protein DCP28_22240, partial [Cytophagales bacterium].                | GCA_003444325.1 |
| HAC62039.1 | ABC_membrane+ABC_tran→?→ LRR-repeats→                                                                                                                              | LRR-repeats+AP-GTPase+COR       | 852  | DCF68_00525       | Cyanobacteria                   | Cyanothece sp. UBA12306               | TPA: GTPase, partial [Cyanothece sp. UBA12306].                                         | GCA_003448685.1 |
| HAC64827.1 | LRR-repeats+AP-GTPase+COR*→  <-Cluster2488_2clades<-Cluster2227_2clades  ISOFLAVOMETHYLASE-HTH→<-METHYLASE<-?  LRR-repeats+AP-GTPase+COR+TM+TM*→?→  <-?<-?<-SWACOS | LRR-repeats+AP-GTPase+COR+TM+TM | 931  | DCF68_15170       | Cyanobacteria                   | Cyanothece sp. UBA12306               | TPA: GTPase [Cyanothece sp. UBA12306].                                                  | GCA_003448685.1 |
| HAG85135.1 | Ferredoxin-RRM→ LRR-repeats+AP-GTPase+COR*→                                                                                                                        | LRR-repeats+AP-GTPase+COR       | 819  | DCL61_29295       | Cyanobacteria                   | Cyanobacteria bacterium UBA12227      | TPA: GTPase [Cyanobacteria bacterium UBA12227].                                         | GCA_003450835.1 |
| HAP64559.1 | LRR-repeats+AP-GTPase+COR*→                                                                                                                                        | LRR-repeats+AP-GTPase+COR       | 754  | DCR93_35450       | Bacteroidetes                   | Cytophagales bacterium                | TPA: hypothetical protein DCR93_35450, partial [Cytophagales bacterium].                | GCA_003454975.1 |
| HAR63371.1 | LRR-repeats+AP-GTPase+COR*→                                                                                                                                        | LRR-repeats+AP-GTPase+COR       | 611  | DCS13_07910       | Terrabacteria group             | Candidatus Margulisbacteria bacterium | TPA: hypothetical protein DCS13_07910, partial [Candidatus Margulisbacteria bacterium]. | GCA_003475905.1 |
| HAS39197.1 | LRR-repeats+AP-GTPase+COR*→                                                                                                                                        | LRR-repeats+AP-GTPase+COR       | 1145 | DCS93_01900       | Bacteroidetes                   | Microscillaceae bacterium             | TPA: hypothetical protein DCS93_01900 [Microscillaceae bacterium].                      | GCA_003483885.1 |
| HAS43483.1 | LRR-repeats→?→?→  <-?  LRR-repeats+AP-GTPase+COR+EAD11*→  <-PAS+HISKIN                                                                                             | LRR-repeats+AP-GTPase+COR+EAD11 | 868  | DCS93_23590       | Bacteroidetes                   | Microscillaceae bacterium             | TPA: hypothetical protein DCS93_23590 [Microscillaceae bacterium].                      | GCA_003483885.1 |





| acc        | operon                                                                                       | architecture                    | len  | gen.name    | taxend                | species                               | define                                                                            | gca             |
|------------|----------------------------------------------------------------------------------------------|---------------------------------|------|-------------|-----------------------|---------------------------------------|-----------------------------------------------------------------------------------|-----------------|
| HCA94361.1 | LRR-repeats→ LRR-repeats+AP-GTPase+COR*→                                                     | LRR-repeats+AP-GTPase+COR       | 892  | DEP38_06745 | Cyanobacteria         | Cyanobacteria bacterium UBA9226       | TPA: hypothetical protein DEP38_06745, partial [Cyanobacteria bacterium UBA9226]. | GCA_003520045.1 |
| HCF17408.1 | LRR-repeats+AP-GTPase+COR+TIR*→ TM+TM+TM→                                                    | LRR-repeats+AP-GTPase+COR+TIR   | 737  | DEV96_05085 | Alphaproteobacteria   | Rhodospirillum rubrum                 | TPA: hypothetical protein DEV96_05085, partial [Rhodospirillum rubrum].           | GCA_003530895.1 |
| HCN30450.1 | LRR-repeats+AP-GTPase+COR*→                                                                  | LRR-repeats+AP-GTPase+COR       | 1024 | DIT64_17260 | Verrucomicrobia       | Verrucomicrobiales bacterium          | TPA: hypothetical protein DIT64_17260 [Verrucomicrobiales bacterium].             | GCA_003545395.1 |
| HCO95252.1 | LRR-repeats+AP-GTPase+COR*→                                                                  | LRR-repeats+AP-GTPase+COR       | 809  | DIU00_15100 | Planctomycetes        | Phycisphaerales bacterium             | TPA: hypothetical protein DIU00_15100 [Phycisphaerales bacterium].                | GCA_003533825.1 |
| HCQ19950.1 | LRR-repeats+AP-GTPase+COR*→?→  <-?<-?  TM→                                                   | LRR-repeats+AP-GTPase+COR       | 754  | DIU28_00335 | Cyanobacteria         | Anabaena sp. UBA12330                 | TPA: hypothetical protein DIU28_00335, partial [Anabaena sp. UBA12330].           | GCA_003525565.1 |
| HCQ20817.1 | LRR-repeats→ LRR-repeats+AP-GTPase+COR+TM+TM*→  <-?  ?→?→?→ ABC-ATPase→                      | LRR-repeats+AP-GTPase+COR+TM+TM | 721  | DIU28_04955 | Cyanobacteria         | Anabaena sp. UBA12330                 | TPA: hypothetical protein DIU28_04955, partial [Anabaena sp. UBA12330].           | GCA_003525565.1 |
| HCR54081.1 | LRR-repeats→ LRR-repeats+AP-GTPase+COR*→                                                     | LRR-repeats+AP-GTPase+COR       | 797  | DIW27_06670 | Bacteroidetes         | Cytophagales bacterium                | TPA: hypothetical protein DIW27_06670 [Cytophagales bacterium].                   | GCA_003524675.1 |
| HCS91704.1 | LRR-repeats+AP-GTPase+COR+TIR*→                                                              | LRR-repeats+AP-GTPase+COR+TIR   | 749  | DIW77_17080 | Gammaproteobacteria   | Chromatiaceae bacterium               | TPA: hypothetical protein DIW77_17080 [Chromatiaceae bacterium].                  | GCA_003525925.1 |
| HCT83732.1 | LRR-repeats+AP-GTPase+COR*→                                                                  | LRR-repeats+AP-GTPase+COR       | 585  | DF296_00860 | Terrabacteria group   | Candidatus Margulisbacteria bacterium | TPA: hypothetical protein DF296_00860 [Candidatus Margulisbacteria bacterium].    | GCA_003542625.1 |
| HCU95641.1 | LRR-repeats+AP-GTPase+COR*→                                                                  | LRR-repeats+AP-GTPase+COR       | 896  | DHU96_24175 | Actinobacteria        | Actinobacteria bacterium              | TPA: hypothetical protein DHU96_24175 [Actinobacteria bacterium].                 | GCA_003541285.1 |
| HDN27288.1 | LRR-repeats+AP-GTPase+COR*→                                                                  | LRR-repeats+AP-GTPase+COR       | 598  | ENG03_09385 | Gammaproteobacteria   | Thioploca sp.                         | TPA: GTP-binding protein, partial [Thioploca sp.].                                | GCA_011043325.1 |
| HEC83827.1 | LRR-repeats+AP-GTPase+COR*→                                                                  | LRR-repeats+AP-GTPase+COR       | 907  | ENI48_01075 | Gammaproteobacteria   | Thioploca sp.                         | TPA: GTPase [Thioploca sp.].                                                      | GCA_011052595.1 |
| HEG42537.1 | <-S1COLD  LRR-repeats+AP-GTPase+COR+TIR*→?→  <-SIG+Alba<-?  ?→?→ REC→                        | LRR-repeats+AP-GTPase+COR       | 1095 | ENH94_00660 | Planctomycetes        | Phycisphaerales bacterium             | TPA: TIR domain-containing protein [Phycisphaerales bacterium].                   | GCA_011053245.1 |
| HER03270.1 | LRR-repeats+AP-GTPase+COR+TIR*→  <-?  ?→?→ Cluster1306_2clades→?→ SIG+TM→ RuvB-AAA+RuvB-HTH→ | LRR-repeats+AP-GTPase+COR+TIR   | 910  | ENR03_13235 | Alphaproteobacteria   | Rhizobiales bacterium                 | TPA: TIR domain-containing protein, partial [Rhizobiales bacterium].              | GCA_011046675.1 |
| HEU35175.1 | Cluster1718_2clades→ LRR-repeats+AP-GTPase+COR*→                                             | LRR-repeats+AP-GTPase+COR       | 718  | ENQ60_27120 | unclassified Bacteria | bacterium                             | TPA: GTP-binding protein, partial [bacterium].                                    | GCA_011047125.1 |
| HFB99816.1 | LRR-repeats+AP-GTPase+COR+TIR*→                                                              | LRR-repeats+AP-GTPase+COR+TIR   | 1132 | ENJ53_03320 | Bacteroidetes         | Phaeodactylibacter sp.                | TPA: TIR domain-containing protein, partial [Phaeodactylibacter sp.].             | GCA_011322485.1 |
| HFS07270.1 | Cluster1370_2clades→ LRR-repeats+AP-GTPase+COR+TIR*→  <-?  REase→                            | LRR-repeats+AP-GTPase+COR+TIR   | 1009 | ENR14_02795 | Cyanobacteria         | Anabaena sp.                          | TPA: TIR domain-containing protein [Anabaena sp.].                                | GCA_011332035.1 |
| HFS07901.1 | LRR-repeats+AP-GTPase+COR+TIR*→  <-?<-?<-ParA-Soj-PloopNTPase                                | LRR-repeats+AP-GTPase+COR+TIR   | 1021 | ENR14_06085 | Cyanobacteria         | Anabaena sp.                          | TPA: GTP-binding protein [Anabaena sp.].                                          | GCA_011332035.1 |
| HGZ29232.1 | LRR-repeats+AP-GTPase+COR*→                                                                  | LRR-repeats+AP-GTPase+COR       | 903  | ENR17_03505 | Bacteroidetes         | Bacteroidetes bacterium               | TPA: hypothetical protein ENR17_03505 [Bacteroidetes bacterium].                  | GCA_011331955.1 |

| acc          | operon                                                                                  | architecture                   | len  | gen.name     | taxend              | species                     | define                                                                    | gca             |
|--------------|-----------------------------------------------------------------------------------------|--------------------------------|------|--------------|---------------------|-----------------------------|---------------------------------------------------------------------------|-----------------|
| HGZ31593.1   | LRR-repeats+AP-GTPase+COR+TIR*→                                                         | LRR-repeats+AP-GTPase+COR+TIR  | 868  | ENR17_15550  | Bacteroidetes       | Bacteroidetes bacterium     | TPA: TIR domain-containing protein, partial [Bacteroidetes bacterium].    | GCA_011331955.1 |
| HHB79310.1   | FGS→?→ RVT→ LRR-repeats+AP-GTPase+COR*→                                                 | LRR-repeats+AP-GTPase+COR      | 458  | ENK85_08770  | Bacteroidetes       | Saprosiraceae bacterium     | TPA: hypothetical protein ENK85_08770, partial [Saprosiraceae bacterium]. | GCA_011371135.1 |
| HHH53255.1   | LRR-repeats+AP-GTPase+COR*→                                                             | LRR-repeats+AP-GTPase+COR      | 413  | ENK91_06320  | Bacteroidetes       | Bacteroidetes bacterium     | TPA: GTP-binding protein, partial [Bacteroidetes bacterium].              | GCA_011371025.1 |
| HHV24864.1   | LRR-repeats+AP-GTPase+COR*→                                                             | LRR-repeats+AP-GTPase+COR      | 716  | GXX65_10185  | Euryarchaeota       | Methanosarcina sp.          | TPA: GTP-binding protein [Methanosarcina sp.].                            | GCA_012839505.1 |
| HIE02480.1   | Cluster1917_2clades→?→?→?→?→  <-?  LRR-repeats+AP-GTPase+COR*→                          | LRR-repeats+AP-GTPase+COR      | 853  | EYP59_19720  | Gammaproteobacteria | Thiotrichaceae bacterium    | TPA: GTPase [Thiotrichaceae bacterium].                                   | GCA_012961805.1 |
| HIE31128.1   | LRR-repeats+AP-GTPase+COR*→                                                             | LRR-repeats+AP-GTPase+COR      | 636  | EYP67_01930  | Euryarchaeota       | Methanosarcinales archaeon  | TPA: GTP-binding protein, partial [Methanosarcinales archaeon].           | GCA_012961645.1 |
| III01375.1   | LRR-repeats+AP-GTPase+COR*→                                                             | LRR-repeats+AP-GTPase+COR      | 622  | HA351_06900  | Euryarchaeota       | Methanosarcinaceae archaeon | TPA: GTP-binding protein [Methanosarcinaceae archaeon].                   | GCA_013329415.1 |
| III91446.1   | <-HhH-RADC+JAB  ?→?→?→ NTP_transf_3→ LRR-repeats→ LRR-repeats+AP-GTPase+COR*→           | LRR-repeats+AP-GTPase+COR      | 672  | HA262_04570  | Euryarchaeota       | Methanosarcina sp.          | TPA: GTP-binding protein, partial [Methanosarcina sp.].                   | GCA_013331275.1 |
| III91684.1   | NTP_transf_3→ LRR-repeats+AP-GTPase+COR*→                                               | LRR-repeats+AP-GTPase+COR      | 735  | HA262_05815  | Euryarchaeota       | Methanosarcina sp.          | TPA: GTP-binding protein [Methanosarcina sp.].                            | GCA_013331275.1 |
| KAA3610009.1 | MORC→?→ LRR-repeats→ LRR-repeats+AP-GTPase+COR*→?→  <-?<-?<-BetaPropeller+BetaPropeller | LRR-repeats+AP-GTPase+COR      | 653  | DWQ03_18700  | Calditrichaeota     | Calditrichaeota bacterium   | hypothetical protein DWQ03_18700 [Calditrichaeota bacterium].             | GCA_008501795.1 |
| KAA3656070.1 | LRR-repeats+AP-GTPase+COR+EAD7*→                                                        | LRR-repeats+AP-GTPase+COR+EAD7 | 779  | DWQ04_32125  | Chloroflexi         | Chloroflexi bacterium       | GTPase, partial [Chloroflexi bacterium].                                  | GCA_008501785.1 |
| KAA3659887.1 | LRR-repeats+AP-GTPase+COR*→                                                             | LRR-repeats+AP-GTPase+COR      | 842  | DWQ04_20995  | Chloroflexi         | Chloroflexi bacterium       | GTPase [Chloroflexi bacterium].                                           | GCA_008501785.1 |
| KAB8152691.1 | <-HISKIN<-?  ?→?→ REC→ LRR-repeats+AP-GTPase+COR+TIR*→  <-RADICAL-SAM                   | LRR-repeats+AP-GTPase+COR+TIR  | 1007 | EZY14_012780 | Bacteroidetes       | Kordia sp.                  | TIR domain-containing protein [Kordia sp. TARA_039_SRF].                  | GCA_006383075.2 |
| KAB8153612.1 | LRR-repeats+AP-GTPase+COR+TIR*→  <-?<-?  ?→  <-?  TM+RHOMBOID→                          | LRR-repeats+AP-GTPase+COR+TIR  | 966  | EZY14_010295 | Bacteroidetes       | Kordia sp.                  | TIR domain-containing protein [Kordia sp. TARA_039_SRF].                  | GCA_006383075.2 |
| KAF0107167.1 | <-HISKIN<-REC  ?→?→?→?→ LRR-repeats+AP-GTPase+COR*→  <-SIG+GT4                          | LRR-repeats+AP-GTPase+COR      | 1065 | FD146_2008   | Chloroflexi         | Anaerolineaceae bacterium   | hypothetical protein FD146_2008 [Anaerolineaceae bacterium].              | GCA_009772985.1 |
| KAF5415978.1 | LRR-repeats+AP-GTPase+COR*→                                                             | LRR-repeats+AP-GTPase+COR      | 561  | C5S48_04205  | Euryarchaeota       | ANME-2 cluster archaeon     | hypothetical protein C5S48_04205 [ANME-2 cluster archaeon].               | GCA_013374355.1 |
| KAF5419007.1 | LRR-repeats+AP-GTPase+COR*→                                                             | LRR-repeats+AP-GTPase+COR      | 865  | C5S49_00980  | Euryarchaeota       | ANME-2 cluster archaeon     | hypothetical protein C5S49_00980 [ANME-2 cluster archaeon].               | GCA_013374365.1 |
| KAF5420469.1 | Cluster1076_2clades→ Cluster1076_2clades→ LRR-repeats+AP-GTPase+COR*→                   | LRR-repeats+AP-GTPase+COR      | 878  | C5S44_08435  | Euryarchaeota       | ANME-2 cluster archaeon     | hypothetical protein C5S44_08435 [ANME-2 cluster archaeon].               | GCA_013374455.1 |
| KAF5421986.1 | LRR-repeats+AP-GTPase+COR*→                                                             | LRR-repeats+AP-GTPase+COR      | 596  | C5S45_02955  | Euryarchaeota       | ANME-2 cluster archaeon     | hypothetical protein C5S45_02955, partial [ANME-2 cluster archaeon].      | GCA_013374465.1 |
| KAF5428813.1 | <-CBS<-CBS  ?→?→ LRR-repeats+AP-GTPase+COR*→                                            | LRR-repeats+AP-GTPase+COR      | 788  | C5S39_10445  | Euryarchaeota       | Methanophagales archaeon    | Leucine-rich repeat (LRR) protein [Methanophagales archaeon].             | GCA_013374505.1 |
| KAF5432496.1 | LRR-repeats+AP-GTPase+COR*→                                                             | LRR-repeats+AP-GTPase+COR      | 599  | C5S39_03480  | Euryarchaeota       | Methanophagales archaeon    | hypothetical protein C5S39_03480 [Methanophagales archaeon].              | GCA_013374505.1 |
| KAF5433375.1 | LRR-repeats+AP-GTPase+COR*→                                                             | LRR-repeats+AP-GTPase+COR      | 838  | C5S35_16480  | Euryarchaeota       | Methanophagales archaeon    | hypothetical protein C5S35_16480 [Methanophagales archaeon].              | GCA_013374565.1 |
| KAF5435535.1 | SIG+TM+TM+TM+TM+TM+TM→  <-?<-?  ?→?→ Aminotran_1_2→ LRR-repeats+AP-GTPase+COR*→         | LRR-repeats+AP-GTPase+COR      | 659  | C5S35_10775  | Euryarchaeota       | Methanophagales archaeon    | hypothetical protein C5S35_10775, partial [Methanophagales archaeon].     | GCA_013374565.1 |
| KAF5438029.1 | LRR-repeats+AP-GTPase+COR*→                                                             | LRR-repeats+AP-GTPase+COR      | 787  | C5S35_01055  | Euryarchaeota       | Methanophagales archaeon    | internalin A, partial [Methanophagales archaeon].                         | GCA_013374565.1 |
| KFF11476.1   | LRR-repeats+AP-GTPase+COR*→                                                             | LRR-repeats+AP-GTPase+COR      | 902  | IW20_19515   | Bacteroidetes       | Flavobacterium hydatis      | hypothetical protein IW20_19515 [Flavobacterium hydatis].                 | GCA_000737695.1 |

| acc        | operon                                                                                                                                   | architecture                              | len  | gen.name       | taxend              | species                          | define                                                                                                          | gca             |
|------------|------------------------------------------------------------------------------------------------------------------------------------------|-------------------------------------------|------|----------------|---------------------|----------------------------------|-----------------------------------------------------------------------------------------------------------------|-----------------|
| KJV08837.1 | LRR-repeats+AP-GTPase+COR*→                                                                                                              | LRR-repeats+AP-GTPase+COR                 | 553  | VZ95_15215     | Alphaproteobacteria | Elstera litoralis                | hypothetical protein VZ95_15215, partial [Elstera litoralis].                                                   | GCA_000963705.1 |
| KOR30146.1 | LRR-repeats+AP-GTPase+COR*→ SIG+RHOD-CDC25→                                                                                              | LRR-repeats+AP-GTPase+COR                 | 653  | TI04_06910     | Gammaproteobacteria | Achromatium sp. WMS2             | hypothetical protein TI04_06910 [Achromatium sp. WMS2].                                                         | GCA_001276605.1 |
| KPA09194.1 | HNH→?→?→?→?→ LRR-repeats+AP-GTPase+COR*→ McrA-NTD→?→ RlaP→ Cluster2261_2clades→                                                          | LRR-repeats+AP-GTPase+COR                 | 923  | MHK_010613     | Deltaproteobacteria | Candidatus Magnetomorum sp. HK-1 | Leucine Rich Repeat (LRR)-containing protein [Candidatus Magnetomorum sp. HK-1].                                | GCA_001292585.1 |
| KPA10003.1 | Cluster2271_2clades→ TPR+TPR→?→?→ LRR-repeats+AP-GTPase+COR+DUF4404*→                                                                    | LRR-repeats+AP-GTPase+COR+DUF4404         | 883  | MHK_009799     | Deltaproteobacteria | Candidatus Magnetomorum sp. HK-1 | small GTP-binding protein domain protein [Candidatus Magnetomorum sp. HK-1].                                    | GCA_001292585.1 |
| KPA12970.1 | LRR-repeats+AP-GTPase+COR*→                                                                                                              | LRR-repeats+AP-GTPase+COR                 | 676  | MHK_006822     | Deltaproteobacteria | Candidatus Magnetomorum sp. HK-1 | leucine-rich repeat-containing protein [Candidatus Magnetomorum sp. HK-1].                                      | GCA_001292585.1 |
| KPA13876.1 | TIR+LRR-repeats+AP-GTPase+COR+Calcineurin*→                                                                                              | TIR+LRR-repeats+AP-GTPase+COR+Calcineurin | 1426 | MHK_005915     | Deltaproteobacteria | Candidatus Magnetomorum sp. HK-1 | small gtp-binding protein [Candidatus Magnetomorum sp. HK-1].                                                   | GCA_001292585.1 |
| KPA14771.1 | LRR-repeats+AP-GTPase+COR+DrHyd*→                                                                                                        | LRR-repeats+AP-GTPase+COR+DrHyd           | 898  | MHK_005023     | Deltaproteobacteria | Candidatus Magnetomorum sp. HK-1 | leucine-rich repeat-containing protein [Candidatus Magnetomorum sp. HK-1].                                      | GCA_001292585.1 |
| KPA15132.1 | LRR-repeats+AP-GTPase+COR+TIR*→                                                                                                          | LRR-repeats+AP-GTPase+COR+TIR             | 1146 | MHK_004657     | Deltaproteobacteria | Candidatus Magnetomorum sp. HK-1 | small GTP-binding domain protein [Candidatus Magnetomorum sp. HK-1].                                            | GCA_001292585.1 |
| KPQ33355.1 | ARSR-HTH→ Cluster2335_2clades→  <?  LRR-repeats→ LRR-repeats+AP-GTPase+COR+TIR*→  <-METHYLASE  ?→  <-SIG+TM+TM+TM<-ABC_membrane+ABC_tran | LRR-repeats+AP-GTPase+COR+TIR             | 887  | HLUCCA11_18720 | Cyanobacteria       | Phormidesmis priestleyi Ana      | Leucine Rich repeats (2 copies)/TIR domain/Miro-like protein/Leucine rich repeat [Phormidesmis priestleyi Ana]. | GCA_001314865.1 |
| KPQ36660.1 | <-Cluster54_3clades<-?  LRR-repeats+AP-GTPase+COR*→                                                                                      | LRR-repeats+AP-GTPase+COR                 | 1200 | inlA           | Cyanobacteria       | Phormidesmis priestleyi Ana      | internalin A [Phormidesmis priestleyi Ana].                                                                     | GCA_001314865.1 |
| KTE25244.1 | TetR-HTH→?→  <-?<-?<-?<-?  LRR-repeats+AP-GTPase+COR+TIR*→                                                                               | LRR-repeats+AP-GTPase+COR+TIR             | 719  | ATE62_22325    | Alphaproteobacteria | Sphingopyxis sp. HIX             | hypothetical protein ATE62_22325 [Sphingopyxis sp. HIX].                                                        | GCA_001468285.1 |
| KTE72816.1 | TetR-HTH→?→  <-?<-?<-?<-?  LRR-repeats+AP-GTPase+COR+TIR*→                                                                               | LRR-repeats+AP-GTPase+COR+TIR             | 716  | ATE72_22070    | Alphaproteobacteria | Sphingopyxis sp. HXXIV           | hypothetical protein ATE72_22070 [Sphingopyxis sp. HXXIV].                                                      | GCA_001468305.1 |
| MAB62252.1 | Cluster1163_3clades→?→ Cluster1131_3clades→?→  <-?<-?  ?→ LRR-repeats+AP-GTPase+COR+TIR*→?→?→ METHYLASE→ ParA-Soj-PloopNTPase→ ParB→     | LRR-repeats+AP-GTPase+COR+TIR             | 1212 | CMK67_03795    | Gammaproteobacteria | Pseudoalteromonas sp.            | hypothetical protein CMK67_03795 [Pseudoalteromonas sp.].                                                       | GCA_002684115.1 |
| MAD04103.1 | LRR-repeats+AP-GTPase+COR*→?→  <-?<-?<-?  CNMP+CRP-HTH→                                                                                  | LRR-repeats+AP-GTPase+COR                 | 956  | CMK65_10845    | Gammaproteobacteria | Pseudoalteromonas sp.            | hypothetical protein CMK65_10845 [Pseudoalteromonas sp.].                                                       | GCA_002685175.1 |
| MAG37481.1 | AP-GTPase+COR+TIR+ACYC→ LRR-repeats+AP-GTPase+COR+DUF4404*→?→  <-?  ?→?→?→  <-DOC+CITB-HTH                                               | LRR-repeats+AP-GTPase+COR+DUF4404         | 884  | CL878_14695    | Chloroflexi         | Dehalococcoidia bacterium        | serine/threonine protein kinase [Dehalococcoidia bacterium].                                                    | GCA_002688445.1 |
| MAM30487.1 | LRR-repeats+AP-GTPase+COR*→  <-?<-tRNA<-?  Nitroreductase-like→  <-FKBP                                                                  | LRR-repeats+AP-GTPase+COR                 | 839  | CMC13_15825    | Bacteroidetes       | Flavobacteriaceae bacterium      | hypothetical protein CMC13_15825 [Flavobacteriaceae bacterium].                                                 | GCA_002693005.1 |
| MAS92856.1 | <-Cluster1364_2clades  SIG+TM+TM+TM+TM+TM→ TIR+LRR-repeats+AP-GTPase+COR*→  <-?<-?<-?<-SIG+TM+TM+TM                                      | TIR+LRR-repeats+AP-GTPase+COR             | 1140 | CMO55_06625    | Verrucomicrobia     | Verrucomicrobiales bacterium     | hypothetical protein CMO55_06625 [Verrucomicrobiales bacterium].                                                | GCA_002698785.1 |
| MAT45170.1 | LRR-repeats+AP-GTPase+COR*→                                                                                                              | LRR-repeats+AP-GTPase+COR                 | 1068 | CL609_22815    | Chloroflexi         | Anaerolineaceae bacterium        | hypothetical protein CL609_22815 [Anaerolineaceae bacterium].                                                   | GCA_002702705.1 |
| MAT70109.1 | <-Cluster1140_2clades<-?  ?→  <-?<-?  LRR-repeats+AP-GTPase+COR+TIR*→                                                                    | LRR-repeats+AP-GTPase+COR+TIR             | 1220 | CMJ58_11380    | Planctomycetes      | Planctomycetaceae bacterium      | hypothetical protein CMJ58_11380 [Planctomycetaceae bacterium].                                                 | GCA_002702655.1 |
| MAT98393.1 | LRR-repeats+AP-GTPase+COR+EAD7*→?→ SIG+PBPB→  <-?  ?→  <-SIG+TM+TM+TM+TM+TM+TM+TM+TM+TM+TM+TM<-REC                                       | LRR-repeats+AP-GTPase+COR+EAD7            | 845  | CL608_14715    | Chloroflexi         | Anaerolineaceae bacterium        | hypothetical protein CL608_14715 [Anaerolineaceae bacterium].                                                   | GCA_002699125.1 |
| MAY74446.1 | ParB→?→  <-?  ClpABN-AAA+ClpABC-AAA→ LRR-repeats+AP-GTPase+COR+TM+TM*→                                                                   | LRR-repeats+AP-GTPase+COR+TM+TM           | 1163 | CMJ31_06925    | Planctomycetes      | Phycisphaerae bacterium          | hypothetical protein CMJ31_06925 [Phycisphaerae bacterium].                                                     | GCA_002706885.1 |

| acc          | operon                                                                                                  | architecture                  | len  | gen.name     | taxend           | species                      | define                                                                                       | gca             |
|--------------|---------------------------------------------------------------------------------------------------------|-------------------------------|------|--------------|------------------|------------------------------|----------------------------------------------------------------------------------------------|-----------------|
| MBA2243669.1 | LRR-repeats+AP-GTPase+COR+TIR*→?→?→  <-?<-?  Cluster1476_2clades→                                       | LRR-repeats+AP-GTPase+COR+TIR | 748  | H0W11_01850  | Gemmatimonadetes | Gemmatimonadetes bacterium   | TIR domain-containing protein [Gemmatimonadetes bacterium].                                  | GCA_013694785.1 |
| MBA2243921.1 | LRR-repeats+AP-GTPase+COR+TIR*→                                                                         | LRR-repeats+AP-GTPase+COR+TIR | 693  | H0W11_03125  | Gemmatimonadetes | Gemmatimonadetes bacterium   | TIR domain-containing protein, partial [Gemmatimonadetes bacterium].                         | GCA_013694785.1 |
| MBA2678589.1 | LRR-repeats+AP-GTPase+COR*→?→  <-?<-Cluster2349_2clades                                                 | LRR-repeats+AP-GTPase+COR     | 363  | H0U76_09400  | Chloroflexi      | Ktedonobacteraceae bacterium | leucine-rich repeat domain-containing protein [Ktedonobacteraceae bacterium].                | GCA_013697605.1 |
| MBA2681600.1 | LRR-repeats+AP-GTPase+COR*→                                                                             | LRR-repeats+AP-GTPase+COR     | 724  | H0U76_24795  | Chloroflexi      | Ktedonobacteraceae bacterium | leucine-rich repeat domain-containing protein, partial [Ktedonobacteraceae bacterium].       | GCA_013697605.1 |
| MBA3240620.1 | LRR-repeats+AP-GTPase+COR*→                                                                             | LRR-repeats+AP-GTPase+COR     | 321  | H0T60_05265  | Acidobacteria    | Acidobacteria bacterium      | leucine-rich repeat domain-containing protein, partial [Acidobacteria bacterium].            | GCA_013813375.1 |
| MBA3574619.1 | LRR-repeats+AP-GTPase+COR*→                                                                             | LRR-repeats+AP-GTPase+COR     | 706  | H0W37_06570  | Actinobacteria   | Pseudonocardiales bacterium  | hypothetical protein H0W37_06570, partial [Pseudonocardiales bacterium].                     | GCA_013817435.1 |
| MBA3673339.1 | Trichomonas-DAM→?→ LRR-repeats+AP-GTPase+COR+TIR*→                                                      | LRR-repeats+AP-GTPase+COR+TIR | 1186 | H0W75_00010  | Bacteroidetes    | Chitinophagaceae bacterium   | leucine-rich repeat domain-containing protein [Chitinophagaceae bacterium].                  | GCA_013816565.1 |
| MBA3805221.1 | LRR-repeats+AP-GTPase+COR+TIR*→                                                                         | LRR-repeats+AP-GTPase+COR+TIR | 805  | H0X14_05855  | Acidobacteria    | Acidobacteria bacterium      | TIR domain-containing protein [Acidobacteria bacterium].                                     | GCA_013815675.1 |
| MBA3964374.1 | LRR-repeats+AP-GTPase+COR+TIR*→                                                                         | LRR-repeats+AP-GTPase+COR+TIR | 1028 | H0X47_01080  | Nitrospirae      | Nitrospirales bacterium      | leucine-rich repeat domain-containing protein [Nitrospirales bacterium].                     | GCA_013821375.1 |
| MBA4062951.1 | <-NUDIX  ?→  <-tRNA  ?→?→  <-?  LRR-repeats+AP-GTPase+COR+TIR*→                                         | LRR-repeats+AP-GTPase+COR+TIR | 867  | C0501_04445  | Planctomycetes   | Isosphaera sp.               | serine/threonine protein kinase [Isosphaera sp.].                                            | GCA_013822345.1 |
| MBB3841051.1 | TPR-repeats→?→ TPR-repeats→?→ LRR-repeats+AP-GTPase+COR+TIR*→  <-?  ?→  <-?  ?→  <-?<-?  TIR+TPR+TPR-S→ | LRR-repeats+AP-GTPase+COR+TIR | 794  | FHS57_005072 | Bacteroidetes    | Runella defluvii             | GTPase SAR1 family protein [Runella defluvii].                                               | GCA_014195535.1 |
| MBB5874185.1 | LRR-repeats+AP-GTPase+COR*→  <-?<-?<-?<-BACTERIALFRINGE+TM+TM                                           | LRR-repeats+AP-GTPase+COR     | 1250 | F4553_007619 | Actinobacteria   | Alloctelliglobospora scoriae | Leucine-rich repeat (LRR) protein/GTPase SAR1 family protein [Alloctelliglobospora scoriae]. | GCA_014204945.1 |
| MBC6434062.1 | LRR-repeats+AP-GTPase+COR*→  <-?<-?  ?→  <-?<-PSE<-N-OB                                                 | LRR-repeats+AP-GTPase+COR     | 824  | FM036_26905  | Cyanobacteria    | Nostoc sp. HG1               | hypothetical protein FM036_26905, partial [Nostoc sp. HG1].                                  | GCA_014324315.1 |
| MBC7569567.1 | LRR-repeats+AP-GTPase+COR+TIR*→                                                                         | LRR-repeats+AP-GTPase+COR+TIR | 863  | H7319_07530  | Bacteroidetes    | Spirosoma sp.                | leucine-rich repeat domain-containing protein [Spirosoma sp.].                               | GCA_014377625.1 |
| MBC7571377.1 | Cluster1281_2clades→  <-?  LRR-repeats+AP-GTPase+COR*→  <-?<-?  ?→  <-?<-?<-?<-Cluster1413_2clades      | LRR-repeats+AP-GTPase+COR     | 1077 | H7319_16850  | Bacteroidetes    | Spirosoma sp.                | leucine-rich repeat domain-containing protein [Spirosoma sp.].                               | GCA_014377625.1 |
| MBC7773965.1 | LRR-repeats+AP-GTPase+COR+TIR*→                                                                         | LRR-repeats+AP-GTPase+COR+TIR | 856  | H7246_00900  | Planctomycetes   | Phycisphaerae bacterium      | TIR domain-containing protein [Phycisphaerae bacterium].                                     | GCA_014379065.1 |
| MBC7775420.1 | LRR-repeats+AP-GTPase+COR*→                                                                             | LRR-repeats+AP-GTPase+COR     | 616  | H7246_08275  | Planctomycetes   | Phycisphaerae bacterium      | leucine-rich repeat domain-containing protein, partial [Phycisphaerae bacterium].            | GCA_014379065.1 |
| MBC7777197.1 | LRR-repeats+AP-GTPase+COR+TIR*→?→ HNH→                                                                  | LRR-repeats+AP-GTPase+COR+TIR | 693  | H7246_17325  | Planctomycetes   | Phycisphaerae bacterium      | GTP-binding protein, partial [Phycisphaerae bacterium].                                      | GCA_014379065.1 |
| MBC7778407.1 | LRR-repeats+AP-GTPase+COR+TIR*→                                                                         | LRR-repeats+AP-GTPase+COR+TIR | 831  | H7246_23450  | Planctomycetes   | Phycisphaerae bacterium      | TIR domain-containing protein [Phycisphaerae bacterium].                                     | GCA_014379065.1 |

| acc          | operon                                                                                                                          | architecture                    | len  | gen.name    | taxend                | species                              | define                                                                               | gca             |
|--------------|---------------------------------------------------------------------------------------------------------------------------------|---------------------------------|------|-------------|-----------------------|--------------------------------------|--------------------------------------------------------------------------------------|-----------------|
| MBC7817185.1 | LRR-repeats+AP-GTPase+COR*→                                                                                                     | LRR-repeats+AP-GTPase+COR       | 238  | IAG10_09885 | Planctomycetes        | Planctomycetaceae bacterium          | hypothetical protein IAG10_09885, partial [Planctomycetaceae bacterium].             | GCA_014379175.1 |
| MBC7817749.1 | <-RHOD-CDC25  LRR-repeats+AP-GTPase+COR+TIR*→                                                                                   | LRR-repeats+AP-GTPase+COR+TIR   | 865  | IAG10_12720 | Planctomycetes        | Planctomycetaceae bacterium          | leucine-rich repeat domain-containing protein [Planctomycetaceae bacterium].         | GCA_014379175.1 |
| MBC7826556.1 | LRR-repeats+AP-GTPase+COR+TIR*→                                                                                                 | LRR-repeats+AP-GTPase+COR+TIR   | 752  | H7122_02330 | Bacteroidetes         | Chitinophagaceae bacterium           | TIR domain-containing protein, partial [Chitinophagaceae bacterium].                 | GCA_014379345.1 |
| MBC7848891.1 | LRR-repeats+AP-GTPase+COR*→                                                                                                     | LRR-repeats+AP-GTPase+COR       | 927  | H7Y31_04105 | Bacteroidetes         | Chitinophagaceae bacterium           | leucine-rich repeat domain-containing protein, partial [Chitinophagaceae bacterium]. | GCA_014379515.1 |
| MBC7877029.1 | RADICAL-SAM→?→?→?→  <-?  ?→ LRR-repeats→ LRR-repeats+AP-GTPase+COR*→?→ ABC-ATPase→                                              | LRR-repeats+AP-GTPase+COR       | 718  | H7Y59_07640 | Chloroflexi           | Anaerolineales bacterium             | leucine-rich repeat domain-containing protein [Anaerolineales bacterium].            | GCA_014379595.1 |
| MBC7877562.1 | <-TM+RHOMBOID<-?<-?<-?  TM→ LRR-repeats+AP-GTPase+COR*→  <-?  SIGMA-HTH→                                                        | LRR-repeats+AP-GTPase+COR       | 1057 | H7Y59_10360 | Chloroflexi           | Anaerolineales bacterium             | hypothetical protein H7Y59_10360 [Anaerolineales bacterium].                         | GCA_014379595.1 |
| MBC8029843.1 | <-REC  ?→?→ Hsp10→?→ LRR-repeats+AP-GTPase+COR+TIR*→  <-?<-?<-?<-?<-ABC-ATPase                                                  | LRR-repeats+AP-GTPase+COR+TIR   | 871  | H7Z16_07010 | Acidobacteria         | Pyrinomonadaceae bacterium           | TIR domain-containing protein [Pyrinomonadaceae bacterium].                          | GCA_014380365.1 |
| MBC8182613.1 | LRR-repeats+AP-GTPase+COR*→?→?→ RelE-ParE→  <-?<-RelE-ParE<-?<-HISKIN                                                           | LRR-repeats+AP-GTPase+COR       | 687  | H8E88_16055 | Bacteria              | candidate division KSB1 bacterium    | hypothetical protein H8E88_16055, partial [candidate division KSB1 bacterium].       | GCA_014381395.1 |
| MBC8235006.1 | LRR-repeats+AP-GTPase+COR+TIR*→                                                                                                 | LRR-repeats+AP-GTPase+COR+TIR   | 1069 | H8E77_36130 | unclassified Bacteria | bacterium                            | leucine-rich repeat domain-containing protein [bacterium].                           | GCA_014381605.1 |
| MBC8264797.1 | LRR-repeats+AP-GTPase+COR*→                                                                                                     | LRR-repeats+AP-GTPase+COR       | 674  | H8E47_11810 | Chloroflexi           | Anaerolineales bacterium             | leucine-rich repeat domain-containing protein [Anaerolineales bacterium].            | GCA_014382145.1 |
| MBC8291013.1 | LRR-repeats+AP-GTPase+COR*→                                                                                                     | LRR-repeats+AP-GTPase+COR       | 692  | H8E37_11925 | Planctomycetes        | Planctomycetes bacterium             | leucine-rich repeat domain-containing protein, partial [Planctomycetes bacterium].   | GCA_014382385.1 |
| MBC8374880.1 | Cluster1757_2clades→?→ LRR-repeats+AP-GTPase+COR+DrHyd*→                                                                        | LRR-repeats+AP-GTPase+COR+DrHyd | 931  | H8E26_02475 | FCB group             | FCB group bacterium                  | 50S ribosome-binding GTPase [FCB group bacterium].                                   | GCA_014382565.1 |
| MBC8468948.1 | LRR-repeats+AP-GTPase+COR*→  <-?  ?→  <-?<-?  ?→  <-?<-SIGMA-HTH                                                                | LRR-repeats+AP-GTPase+COR       | 1003 | H8D56_05705 | Planctomycetes        | Planctomycetes bacterium             | leucine-rich repeat domain-containing protein [Planctomycetes bacterium].            | GCA_014384025.1 |
| MBC9785332.1 | Cluster1542_2clades→ LRR-repeats+AP-GTPase+COR*→                                                                                | LRR-repeats+AP-GTPase+COR       | 976  | H1S01_12510 | Firmicutes            | Heliobacterium chlorum               | leucine-rich repeat domain-containing protein [Heliobacterium chlorum].              | -               |
| MBP93715.1   | LRR-repeats+AP-GTPase+COR*→  <-?  ?→  <-?<-Cluster1995_2clades                                                                  | LRR-repeats+AP-GTPase+COR       | 894  | CMC55_06315 | Bacteroidetes         | Flavobacteriaceae bacterium          | hypothetical protein CMC55_06315 [Flavobacteriaceae bacterium].                      | GCA_002726785.1 |
| MBV11156.1   | APATPase+BetaPropeller_WD40-repeats→?→  <-?  FGS→ FGS→ FGS→ LRR-repeats+AP-GTPase+COR+TIR*→ Cluster1411_2clades→ FGS→ FGS→ FGS→ | LRR-repeats+AP-GTPase+COR+TIR   | 1075 | CMN21_18290 | Planctomycetes        | Rubinisphaera sp.                    | hypothetical protein CMN21_18290 [Rubinisphaera sp.].                                | GCA_002731545.1 |
| MQP68112.1   | LRR-repeats+AP-GTPase+COR+TIR*→  <-ParB<-ParA-Soj-PloopNTPase                                                                   | LRR-repeats+AP-GTPase+COR+TIR   | 993  | GE253_22605 | Alphaproteobacteria   | Niveispirillum sp. SYP-B3756         | TIR domain-containing protein [Niveispirillum sp. SYP-B3756].                        | GCA_009495745.1 |
| MQY15494.1   | <-Cluster2127_2clades<-?  ?→ LRR-repeats+AP-GTPase+COR*→?→ REC→ HISKIN→                                                         | LRR-repeats+AP-GTPase+COR       | 980  | SRB5_56760  | Actinobacteria        | Streptomyces sp. RB5                 | hypothetical protein SRB5_56760 [Streptomyces sp. RB5].                              | GCA_009604385.1 |
| MSP13971.1   | LRR-repeats+AP-GTPase+COR*→                                                                                                     | LRR-repeats+AP-GTPase+COR       | 792  | EXR62_13575 | Chloroflexi           | Chloroflexi bacterium                | hypothetical protein EXR62_13575, partial [Chloroflexi bacterium].                   | GCA_009692745.1 |
| MSS71311.1   | Cluster1601_2clades→ LRR-repeats+AP-GTPase+COR*→ COR+TIR→  <-Cluster1913_2clades<-?<-RPN10                                      | LRR-repeats+AP-GTPase+COR       | 556  | EXS64_07460 | FCB group             | Candidatus Latescibacteria bacterium | hypothetical protein EXS64_07460 [Candidatus Latescibacteria bacterium].             | GCA_009694805.1 |

| acc        | operon                                                                                                                                                                                               | architecture                          | len | gen.name    | taxend                | species                            | define                                                                 | gca             |
|------------|------------------------------------------------------------------------------------------------------------------------------------------------------------------------------------------------------|---------------------------------------|-----|-------------|-----------------------|------------------------------------|------------------------------------------------------------------------|-----------------|
| NAS89011.1 | POLYSACPOLYMERASE→ LRR-repeats→ LRR-repeats+AP-GTPase+COR*→  <?-?  ?→?→  <-PIN                                                                                                                       | LRR-repeats+AP-GTPase+COR             | 604 | C4E24_04665 | Euryarchaeota         | ANME-1 cluster archaeon AG-394-G21 | GTP-binding protein [ANME-1 cluster archaeon AG-394-G21].              | GCA_009903435.1 |
| NAT10404.1 | Cluster1536_2clades→  <?-?<?-?  POLYSACPOLYMERASE→?→ LRR-repeats+AP-GTPase+COR→ LRR-repeats→ LRR-repeats+AP-GTPase+COR→?→  <-PIN                                                                     | LRR-repeats+AP-GTPase+COR             | 688 | C4E22_02460 | Euryarchaeota         | ANME-1 cluster archaeon AG-394-G06 | GTP-binding protein [ANME-1 cluster archaeon AG-394-G06].              | GCA_009903405.1 |
| NBC32680.1 | LRR-repeats+AP-GTPase+COR+TM+TM+TM+TM*→  <?-?  ?→?→?→  <-TM+RHOMBOID                                                                                                                                 | LRR-repeats+AP-GTPase+COR+TM+TM+TM+TM | 806 | GVY13_08395 | Alphaproteobacteria   | Alphaproteobacteria bacterium      | GTP-binding protein, partial [Alphaproteobacteria bacterium].          | GCA_009909005.1 |
| NCP86657.1 | <-XIS-HTH  HTH+HTH→  <-WLM  ?→ NACHT+68TM-wHTH→ REase→?→ LRR-repeats+AP-GTPase+COR*→                                                                                                                 | LRR-repeats+AP-GTPase+COR             | 960 | GW829_04700 | unclassified Bacteria | bacterium                          | hypothetical protein GW829_04700, partial [bacterium].                 | GCA_009994085.1 |
| NCP88511.1 | REase→ LRR-repeats+AP-GTPase+COR*→                                                                                                                                                                   | LRR-repeats+AP-GTPase+COR             | 336 | GW829_14210 | unclassified Bacteria | bacterium                          | hypothetical protein GW829_14210, partial [bacterium].                 | GCA_009994085.1 |
| NCP88560.1 | LRR-repeats+AP-GTPase+COR*→                                                                                                                                                                          | LRR-repeats+AP-GTPase+COR             | 382 | GW829_14460 | unclassified Bacteria | bacterium                          | hypothetical protein GW829_14460, partial [bacterium].                 | GCA_009994085.1 |
| NCQ69077.1 | CHTH→ LRR-repeats+AP-GTPase+COR*→                                                                                                                                                                    | LRR-repeats+AP-GTPase+COR             | 382 | GPI97_07600 | Cyanobacteria         | Microcystis aeruginosa W13-16      | leucine-rich repeat protein, partial [Microcystis aeruginosa W13-16].  | GCA_009995625.1 |
| NCQ78095.1 | CHTH→ LRR-repeats+AP-GTPase+COR*→                                                                                                                                                                    | LRR-repeats+AP-GTPase+COR             | 359 | GPI99_08005 | Cyanobacteria         | Microcystis aeruginosa W13-15      | GTP-binding protein, partial [Microcystis aeruginosa W13-15].          | GCA_009995645.1 |
| NCQ94522.1 | Ferredoxin-betagrasp→ tRNA→ tRNA→ SAM-methylase→?→  <?-?<-SIG+TPM_phosphatase+TM+TM+TM  LRR-repeats+AP-GTPase+COR+TM+TM*→  <?-?<-?<-?<-Pro_CA                                                        | LRR-repeats+AP-GTPase+COR+TM+TM       | 805 | GPJ33_04160 | Cyanobacteria         | Microcystis aeruginosa W11-03      | leucine-rich repeat protein [Microcystis aeruginosa W11-03].           | GCA_009995775.1 |
| NCR15129.1 | CHTH→ LRR-repeats+AP-GTPase+COR*→                                                                                                                                                                    | LRR-repeats+AP-GTPase+COR             | 413 | GPJ24_21065 | Cyanobacteria         | Microcystis aeruginosa SX13-11     | GTP-binding protein, partial [Microcystis aeruginosa SX13-11].         | GCA_009995725.1 |
| NCR28927.1 | CHTH→ LRR-repeats+AP-GTPase+COR*→                                                                                                                                                                    | LRR-repeats+AP-GTPase+COR             | 386 | GPJ25_22505 | Cyanobacteria         | Microcystis aeruginosa LE13-04     | leucine-rich repeat protein, partial [Microcystis aeruginosa LE13-04]. | GCA_009995995.1 |
| NCR34650.1 | LRR-repeats+AP-GTPase+COR+TM+TM*→                                                                                                                                                                    | LRR-repeats+AP-GTPase+COR+TM+TM       | 789 | GPJ31_03655 | Cyanobacteria         | Microcystis aeruginosa S11-05      | leucine-rich repeat protein [Microcystis aeruginosa S11-05].           | GCA_009995785.1 |
| NCR46978.1 | CHTH→ LRR-repeats+AP-GTPase+COR*→                                                                                                                                                                    | LRR-repeats+AP-GTPase+COR             | 514 | GPJ09_24595 | Cyanobacteria         | Microcystis aeruginosa SX13-01     | leucine-rich repeat protein, partial [Microcystis aeruginosa SX13-01]. | GCA_009995735.1 |
| NCR55589.1 | LRR-repeats+AP-GTPase+COR+TM+TM*→  <?-?<-?<-?<-Pro_CA  ?→  <?-?<-tRNA<-tRNA<-Ferredoxin-betagrasp                                                                                                    | LRR-repeats+AP-GTPase+COR+TM+TM       | 710 | GPJ10_20085 | Cyanobacteria         | Microcystis aeruginosa L211-07     | GTP-binding protein, partial [Microcystis aeruginosa L211-07].         | GCA_009996085.1 |
| NCR60375.1 | CHTH→ LRR-repeats+AP-GTPase+COR*→                                                                                                                                                                    | LRR-repeats+AP-GTPase+COR             | 478 | GPJ01_22875 | Cyanobacteria         | Microcystis aeruginosa LL13-06     | GTP-binding protein, partial [Microcystis aeruginosa LL13-06].         | GCA_009995895.1 |
| NCR68842.1 | CHTH→ LRR-repeats+AP-GTPase+COR*→                                                                                                                                                                    | LRR-repeats+AP-GTPase+COR             | 545 | GPJ34_21175 | Cyanobacteria         | Microcystis aeruginosa LL11-07     | GTP-binding protein, partial [Microcystis aeruginosa LL11-07].         | GCA_009995855.1 |
| NCR71934.1 | SAM-methylase→?→  <?-?<-SIG+TPM_phosphatase+TM+TM+TM  LRR-repeats+AP-GTPase+COR+TM+TM*→  <?-?<-?<-?<-Pro_CA                                                                                          | LRR-repeats+AP-GTPase+COR+TM+TM       | 751 | GPI93_12415 | Cyanobacteria         | Microcystis aeruginosa LG13-12     | leucine-rich repeat protein [Microcystis aeruginosa LG13-12].          | GCA_009995925.1 |
| NCR77025.1 | SIG+TM+TM+TM+TM+TM+TM+TM+TM→  <-?  Mbetalac→ SAM-methylase→?→  <?-?<-SIG+TPM_phosphatase+TM+TM+TM  LRR-repeats+AP-GTPase+COR+TM+TM*→                                                                 | LRR-repeats+AP-GTPase+COR+TM+TM       | 897 | GPI92_16105 | Cyanobacteria         | Microcystis aeruginosa K13-06      | GTP-binding protein [Microcystis aeruginosa K13-06].                   | GCA_009996165.1 |
| NCR80564.1 | SIG+TM+TM+TM+TM+TM+TM+TM+TM→  <-?  Mbetalac→ SAM-methylase→?→  <?-?<-SIG+TPM_phosphatase+TM+TM+TM  LRR-repeats+AP-GTPase+COR+TM+TM*→                                                                 | LRR-repeats+AP-GTPase+COR+TM+TM       | 805 | GPI91_11595 | Cyanobacteria         | Microcystis aeruginosa K13-10      | leucine-rich repeat protein [Microcystis aeruginosa K13-10].           | GCA_009996105.1 |
| NCR97058.1 | SIG+TM+TM+TM+TM+TM+TM+TM+TM→  <-?  Mbetalac→ SAM-methylase→?→  <?-?<-SIG+TPM_phosphatase+TM+TM+TM  LRR-repeats+AP-GTPase+COR+TM+TM*→  <?-?<-?<-?<-Pro_CA  ?→  <?-?<-tRNA<-tRNA<-Ferredoxin-betagrasp | LRR-repeats+AP-GTPase+COR+TM+TM       | 920 | GPJ32_04180 | Cyanobacteria         | Microcystis aeruginosa L311-01     | GTP-binding protein [Microcystis aeruginosa L311-01].                  | GCA_009996025.1 |
| NCS08858.1 | CHTH→ LRR-repeats+AP-GTPase+COR*→                                                                                                                                                                    | LRR-repeats+AP-GTPase+COR             | 386 | GPJ07_21130 | Cyanobacteria         | Microcystis aeruginosa G13-07      | GTP-binding protein, partial [Microcystis aeruginosa G13-07].          | GCA_009996305.1 |
| NCS11263.1 | CHTH→ LRR-repeats+AP-GTPase+COR+TM+TM*→                                                                                                                                                              | LRR-repeats+AP-GTPase+COR+TM+TM       | 852 | GPJ08_08960 | Cyanobacteria         | Microcystis aeruginosa G13-09      | GTP-binding protein [Microcystis aeruginosa G13-09].                   | GCA_009996255.1 |
| NCS17812.1 | CHTH→ LRR-repeats+AP-GTPase+COR*→                                                                                                                                                                    | LRR-repeats+AP-GTPase+COR             | 503 | GPJ02_20805 | Cyanobacteria         | Microcystis aeruginosa G13-12      | leucine-rich repeat protein, partial [Microcystis aeruginosa G13-12].  | GCA_009996205.1 |
| NCS22942.1 | LRR-repeats+AP-GTPase+COR*→                                                                                                                                                                          | LRR-repeats+AP-GTPase+COR             | 353 | GPJ15_26105 | Cyanobacteria         | Microcystis aeruginosa G11-06      | GTP-binding protein, partial [Microcystis aeruginosa G11-06].          | GCA_009996385.1 |
| NCS24651.1 | LRR-repeats+AP-GTPase+COR+TM+TM*→  <?-?<-FGS<-?<-?  ?→?→ Aminotran_1_2→                                                                                                                              | LRR-repeats+AP-GTPase+COR+TM+TM       | 732 | GPI96_09100 | Cyanobacteria         | Microcystis aeruginosa BS13-02     | GTP-binding protein, partial [Microcystis aeruginosa BS13-02].         | GCA_009996485.1 |
| NCS52102.1 | CHTH→ LRR-repeats+AP-GTPase+COR*→                                                                                                                                                                    | LRR-repeats+AP-GTPase+COR             | 397 | GPJ23_06895 | Cyanobacteria         | Microcystis aeruginosa G13-05      | leucine-rich repeat protein, partial [Microcystis aeruginosa G13-05].  | GCA_009996285.1 |

| acc        | operon                                                                                                        | architecture                      | len  | gen.name    | taxend                | species                  | define                                                                                        | gca             |
|------------|---------------------------------------------------------------------------------------------------------------|-----------------------------------|------|-------------|-----------------------|--------------------------|-----------------------------------------------------------------------------------------------|-----------------|
| NCS59859.1 | LRR-repeats+AP-GTPase+COR*→                                                                                   | LRR-repeats+AP-GTPase+COR         | 339  | GPJ16_25035 | Cyanobacteria         | Microcystis aeruginosa   | GTP-binding protein, partial                                                                  | GCA_009996445.1 |
| NCT21185.1 | <-XIS-HTH  HTH+HTH→  <-WLM  ?→ NACHT+68TM-wHTH→ REase→?→ LRR-repeats+AP-GTPase+COR*→                          | LRR-repeats+AP-GTPase+COR         | 956  | GW781_08530 | unclassified Bacteria | bacterium                | [Microcystis aeruginosa G11-04].<br>hypothetical protein GW781_08530,<br>partial [bacterium]. | GCA_009994975.1 |
| NCT65324.1 | CHTH→ LRR-repeats+AP-GTPase+COR*→                                                                             | LRR-repeats+AP-GTPase+COR         | 434  | GPJ03_21265 | Cyanobacteria         | Microcystis aeruginosa   | leucine-rich repeat protein, partial                                                          | GCA_009996325.1 |
| NCY16589.1 | LRR-repeats+AP-GTPase+COR+TIR*→                                                                               | LRR-repeats+AP-GTPase+COR+TIR     | 1058 | EBX39_07430 | Actinobacteria        | Actinobacteria bacterium | [Microcystis aeruginosa G13-01].<br>hypothetical protein EBX39_07430                          | GCA_010021725.1 |
| NEN97779.1 | REC→  <-TPR-repeats  LRR-repeats+AP-GTPase+COR+DUF4404*→                                                      | LRR-repeats+AP-GTPase+COR+DUF4404 | 971  | F6K50_20310 | Cyanobacteria         | Moorea sp. SIO3I7        | [Actinobacteria bacterium].<br>GTPase [Moorea sp. SIO3I7].                                    | GCA_010692375.1 |
| NEO07696.1 | SIG+TM+TM+TM+TM+TM+TM+TM+TM→?→ ABC-ATPase→?→ ABC-ATPase→?→ LRR-repeats+AP-GTPase+COR*→                        | LRR-repeats+AP-GTPase+COR         | 1373 | F6K51_19885 | Cyanobacteria         | Moorea sp. SIO3I8        | leucine-rich repeat protein [Moorea sp. SIO3I8].                                              | GCA_010692325.1 |
| NEO14597.1 | REC→  <-TPR-repeats<-?  LRR-repeats+AP-GTPase+COR+DUF4404*→                                                   | LRR-repeats+AP-GTPase+COR+DUF4404 | 797  | F6K46_20370 | Cyanobacteria         | Moorea sp. SIO3E8        | GTPase [Moorea sp. SIO3E8].                                                                   | GCA_010692445.1 |
| NEO18066.1 | ABC-ATPase→  <-?  ABC-ATPase→?→?→  <-?  LRR-repeats+AP-GTPase+COR*→?→  <-?<-HNH<-PSE  ?→  <-Cluster5_5clades  | LRR-repeats+AP-GTPase+COR         | 852  | F6K57_01150 | Cyanobacteria         | Moorea sp. SIO4A5        | GTPase [Moorea sp. SIO4A5].                                                                   | GCA_010672005.1 |
| NEO21732.1 | REC→  <-?  REC→  <-TPR-repeats  LRR-repeats+AP-GTPase+COR+DUF4404*→                                           | LRR-repeats+AP-GTPase+COR+DUF4404 | 949  | F6K57_21060 | Cyanobacteria         | Moorea sp. SIO4A5        | GTPase [Moorea sp. SIO4A5].                                                                   | GCA_010672005.1 |
| NEO28667.1 | LRR-repeats+AP-GTPase+COR*→                                                                                   | LRR-repeats+AP-GTPase+COR         | 372  | F6K03_17765 | Cyanobacteria         | Kamptonema sp. SIO4C4    | GTPase, partial [Kamptonema sp. SIO4C4].                                                      | GCA_010692335.1 |
| NEO36773.1 | SIG+TM+TM+TM+TM+TM+TM+TM+TM→ ABC-ATPase→?→ ABC-ATPase→  <-?  ?→ LRR-repeats+AP-GTPase+COR*→                   | LRR-repeats+AP-GTPase+COR         | 847  | F6J90_10815 | Cyanobacteria         | Moorea sp. SIOASIH       | GTPase [Moorea sp. SIOASIH].                                                                  | GCA_010671925.1 |
| NEO37599.1 | REC→  <-?<-?  REC→  <-TPR-repeats<-?  ?→ LRR-repeats+AP-GTPase+COR+DUF4404*→ PSE→  <-?<-PSE  ?→?→?→  <-?  TM→ | LRR-repeats+AP-GTPase+COR+DUF4404 | 1099 | F6J90_15180 | Cyanobacteria         | Moorea sp. SIOASIH       | leucine-rich repeat protein [Moorea sp. SIOASIH].                                             | GCA_010671925.1 |
| NEO43843.1 | SbcC→?→ LRR-repeats+AP-GTPase+COR*→                                                                           | LRR-repeats+AP-GTPase+COR         | 1256 | F6K55_06775 | Cyanobacteria         | Moorea sp. SIO4A3        | leucine-rich repeat protein [Moorea sp. SIO4A3].                                              | GCA_010672045.1 |
| NEO48162.1 | REC→  <-TPR-repeats  LRR-repeats+AP-GTPase+COR*→                                                              | LRR-repeats+AP-GTPase+COR         | 616  | F6K55_30210 | Cyanobacteria         | Moorea sp. SIO4A3        | leucine-rich repeat protein, partial [Moorea sp. SIO4A3].                                     | GCA_010672045.1 |
| NEO55671.1 | LRR-repeats→?→ AP-GTPase*→  <-?<-SIG+Trypsin+PDZ                                                              | AP-GTPase                         | 113  | F6K54_22940 | Cyanobacteria         | Okeania sp. SIO3B5       | hypothetical protein F6K54_22940 [Okeania sp. SIO3B5].                                        | GCA_010692555.1 |
| NEO56464.1 | LRR-repeats+AP-GTPase+COR*→  <-RelE-ParE                                                                      | LRR-repeats+AP-GTPase+COR         | 856  | F6K54_27310 | Cyanobacteria         | Okeania sp. SIO3B5       | GTPase [Okeania sp. SIO3B5].                                                                  | GCA_010692555.1 |
| NEO57234.1 | <-RADICAL-SAM  PSE→ REC→?→ LRR-repeats+AP-GTPase+COR*→                                                        | LRR-repeats+AP-GTPase+COR         | 472  | F6K54_31710 | Cyanobacteria         | Okeania sp. SIO3B5       | GTPase, partial [Okeania sp. SIO3B5].                                                         | GCA_010692555.1 |
| NEO68320.1 | SIG+PBPI→?→ SIG+TM+TM+TM+TM+TM+TM+TM+TM→?→ ABC-ATPase→ ABC-ATPase→  <-?  LRR-repeats+AP-GTPase+COR*→          | LRR-repeats+AP-GTPase+COR         | 884  | F6K52_02085 | Cyanobacteria         | Moorea sp. SIO3H5        | leucine-rich repeat protein [Moorea sp. SIO3H5].                                              | GCA_010692395.1 |
| NEO73423.1 | REC→  <-TPR-repeats<-?  LRR-repeats+AP-GTPase+COR+DUF4404*→                                                   | LRR-repeats+AP-GTPase+COR+DUF4404 | 933  | F6K52_29165 | Cyanobacteria         | Moorea sp. SIO3H5        | GTPase [Moorea sp. SIO3H5].                                                                   | GCA_010692395.1 |
| NEO79069.1 | REC→  <-TPR-repeats  LRR-repeats+AP-GTPase+COR+DUF4404*→                                                      | LRR-repeats+AP-GTPase+COR+DUF4404 | 929  | F6J99_23600 | Cyanobacteria         | Moorea sp. SIO4G3        | GTPase [Moorea sp. SIO4G3].                                                                   | GCA_010692305.1 |
| NEO83336.1 | Cluster5_5clades→?→ PSE→ LRR-repeats+AP-GTPase+COR*→                                                          | LRR-repeats+AP-GTPase+COR         | 1006 | F6J87_03595 | Cyanobacteria         | Spirulina sp. SIO3F2     | leucine-rich repeat protein [Spirulina sp. SIO3F2].                                           | GCA_010672165.1 |
| NEO85545.1 | MNS-STAND+CR-REase3→  <-?<-?  ?→  <-REC<-REC  HISKIN→ LRR-repeats+AP-GTPase+COR*→  <-HISKIN                   | LRR-repeats+AP-GTPase+COR         | 1127 | F6J87_15045 | Cyanobacteria         | Spirulina sp. SIO3F2     | GTPase [Spirulina sp. SIO3F2].                                                                | GCA_010672165.1 |
| NEO86840.1 | TM+TM+TM+TM+TM+TM+TM+TM+TM→?→  <-?<-Pentapeptide-repeats  ?→ LRR-repeats+AP-GTPase+COR+DUF4404*→              | LRR-repeats+AP-GTPase+COR+DUF4404 | 1131 | F6J87_21660 | Cyanobacteria         | Spirulina sp. SIO3F2     | GTP-binding protein [Spirulina sp. SIO3F2].                                                   | GCA_010672165.1 |
| NEO88027.1 | LRR-repeats→ LRR-repeats+AP-GTPase+COR*→                                                                      | LRR-repeats+AP-GTPase+COR         | 800  | F6J87_27790 | Cyanobacteria         | Spirulina sp. SIO3F2     | hypothetical protein F6J87_27790 [Spirulina sp. SIO3F2].                                      | GCA_010672165.1 |
| NEO88064.1 | Cluster1048_2clades→ LRR-repeats+AP-GTPase+COR*→                                                              | LRR-repeats+AP-GTPase+COR         | 1166 | F6J87_27980 | Cyanobacteria         | Spirulina sp. SIO3F2     | GTPase [Spirulina sp. SIO3F2].                                                                | GCA_010672165.1 |
| NEO88189.1 | LRR-repeats+AP-GTPase+COR*→                                                                                   | LRR-repeats+AP-GTPase+COR         | 1134 | F6J87_28620 | Cyanobacteria         | Spirulina sp. SIO3F2     | hypothetical protein F6J87_28620 [Spirulina sp. SIO3F2].                                      | GCA_010672165.1 |
| NEP02262.1 | LRR-repeats+AP-GTPase+COR*→ ParA-Soj-PloopNTPase→                                                             | LRR-repeats+AP-GTPase+COR         | 814  | F6K58_27120 | Cyanobacteria         | Symploca sp. SIO2E9      | leucine-rich repeat protein [Symploca sp. SIO2E9].                                            | GCA_010692645.1 |
| NEP15532.1 | LRR-repeats+AP-GTPase+COR+TIR*→?→  <-?  ?→  <-?<-?<-?  ABhydrolase→                                           | LRR-repeats+AP-GTPase+COR+TIR     | 1041 | F6J97_01370 | Cyanobacteria         | Leptolyngbya sp. SIO4C1  | TIR domain-containing protein [Leptolyngbya sp. SIO4C1].                                      | GCA_010671975.1 |

| acc        | operon                                                                                                                                     | architecture                      | len  | gen.name    | taxend        | species                 | define                                                               | gca             |
|------------|--------------------------------------------------------------------------------------------------------------------------------------------|-----------------------------------|------|-------------|---------------|-------------------------|----------------------------------------------------------------------|-----------------|
| NEP17061.1 | TM+TM+TM+TM+TM→ LRR-repeats+AP-GTPase+COR+DUF4404*→  <-SIG+TM+TM                                                                           | LRR-repeats+AP-GTPase+COR+DUF4404 | 1026 | F6J97_09150 | Cyanobacteria | Leptolyngbya sp. SIO4C1 | GTP-binding protein [Leptolyngbya sp. SIO4C1].                       | GCA_010671975.1 |
| NEP23180.1 | SIG+TM+TM+TM+TM+TM+TM+TM→?→ ABC-ATPase→<br>ABC-ATPase→  <-?  ?→  <-?  LRR-repeats+AP-GTPase+COR*→?→  <-?<-HNH<-PSE  ?→  <-Cluster5_5clades | LRR-repeats+AP-GTPase+COR         | 892  | F6K49_14560 | Cyanobacteria | Moorea sp. SIO3I6       | GTPase [Moorea sp. SIO3I6].                                          | GCA_010672095.1 |
| NEP27050.1 | LRR-repeats+AP-GTPase+COR+DUF4404*→                                                                                                        | LRR-repeats+AP-GTPase+COR+DUF4404 | 909  | F6K49_35465 | Cyanobacteria | Moorea sp. SIO3I6       | GTPase [Moorea sp. SIO3I6].                                          | GCA_010672095.1 |
| NEP34707.1 | LRR-repeats+AP-GTPase+COR+DUF4404*→                                                                                                        | LRR-repeats+AP-GTPase+COR+DUF4404 | 924  | F6K38_25730 | Cyanobacteria | Moorea sp. SIO3B2       | GTPase, partial [Moorea sp. SIO3B2].                                 | GCA_010692525.1 |
| NEP80618.1 | LRR-repeats+AP-GTPase+COR*→                                                                                                                | LRR-repeats+AP-GTPase+COR         | 891  | F6K39_22060 | Cyanobacteria | Okeania sp. SIO3B3      | GTPase [Okeania sp. SIO3B3].                                         | GCA_010692535.1 |
| NEP81305.1 | LRR-repeats+AP-GTPase+COR*→                                                                                                                | LRR-repeats+AP-GTPase+COR         | 790  | F6K39_25960 | Cyanobacteria | Okeania sp. SIO3B3      | GTPase [Okeania sp. SIO3B3].                                         | GCA_010692535.1 |
| NEP82037.1 | LRR-repeats+AP-GTPase+COR*→                                                                                                                | LRR-repeats+AP-GTPase+COR         | 664  | F6K39_30180 | Cyanobacteria | Okeania sp. SIO3B3      | hypothetical protein F6K39_30180 [Okeania sp. SIO3B3].               | GCA_010692535.1 |
| NEP82994.1 | LRR-repeats+AP-GTPase*→                                                                                                                    | LRR-repeats+AP-GTPase             | 713  | F6K39_35565 | Cyanobacteria | Okeania sp. SIO3B3      | leucine-rich repeat protein [Okeania sp. SIO3B3].                    | GCA_010692535.1 |
| NEP88726.1 | <-HhH-RADC+JAB<-?  LRR-repeats+AP-GTPase+COR*→                                                                                             | LRR-repeats+AP-GTPase+COR         | 800  | F6K18_18835 | Cyanobacteria | Okeania sp. SIO2C2      | GTPase [Okeania sp. SIO2C2].                                         | GCA_010692625.1 |
| NEQ25590.1 | LRR-repeats+AP-GTPase+COR*→                                                                                                                | LRR-repeats+AP-GTPase+COR         | 329  | F6K28_42320 | Cyanobacteria | Microcoleus sp. SIO2G3  | hypothetical protein F6K28_42320, partial [Microcoleus sp. SIO2G3].  | GCA_010672365.1 |
| NEQ30222.1 | SF2-DUF3427A→  <-PSE  ?→ LRR-repeats+AP-GTPase+COR*→                                                                                       | LRR-repeats+AP-GTPase+COR         | 425  | F6K04_04355 | Cyanobacteria | Leptolyngbya sp. SIO4C5 | GTP-binding protein, partial [Leptolyngbya sp. SIO4C5].              | GCA_010671965.1 |
| NEQ30763.1 | LRR-repeats+AP-GTPase+COR+DrHyd*→  <-SAM-methylase                                                                                         | LRR-repeats+AP-GTPase+COR+DrHyd   | 1168 | F6K04_07140 | Cyanobacteria | Leptolyngbya sp. SIO4C5 | hypothetical protein F6K04_07140 [Leptolyngbya sp. SIO4C5].          | GCA_010671965.1 |
| NEQ30823.1 | LRR-repeats+AP-GTPase+COR*→                                                                                                                | LRR-repeats+AP-GTPase+COR         | 1087 | F6K04_07455 | Cyanobacteria | Leptolyngbya sp. SIO4C5 | hypothetical protein F6K04_07455 [Leptolyngbya sp. SIO4C5].          | GCA_010671965.1 |
| NEQ33180.1 | LRR-repeats+AP-GTPase+COR+TIR*→  <-Cluster2398_2clades                                                                                     | LRR-repeats+AP-GTPase+COR+TIR     | 974  | F6K04_19645 | Cyanobacteria | Leptolyngbya sp. SIO4C5 | TIR domain-containing protein [Leptolyngbya sp. SIO4C5].             | GCA_010671965.1 |
| NEQ38623.1 | LRR-repeats→  <-?  ?→ LRR-repeats+AP-GTPase+COR*→                                                                                          | LRR-repeats+AP-GTPase+COR         | 778  | F6K40_21075 | Cyanobacteria | Okeania sp. SIO3I5      | GTPase [Okeania sp. SIO3I5].                                         | GCA_010672085.1 |
| NEQ39708.1 | LRR-repeats+AP-GTPase+COR*→                                                                                                                | LRR-repeats+AP-GTPase+COR         | 641  | F6K40_27040 | Cyanobacteria | Okeania sp. SIO3I5      | hypothetical protein F6K40_27040 [Okeania sp. SIO3I5].               | GCA_010672085.1 |
| NEQ41322.1 | LRR-repeats+AP-GTPase+COR*→                                                                                                                | LRR-repeats+AP-GTPase+COR         | 923  | F6K40_36055 | Cyanobacteria | Okeania sp. SIO3I5      | GTPase [Okeania sp. SIO3I5].                                         | GCA_010672085.1 |
| NEQ51480.1 | LRR-repeats+AP-GTPase+COR+DrHyd*→  <-?  ?→  <-SF2-DUF3427A                                                                                 | LRR-repeats+AP-GTPase+COR+DrHyd   | 841  | F6K11_15280 | Cyanobacteria | Leptolyngbya sp. SIO3F4 | hypothetical protein F6K11_15280, partial [Leptolyngbya sp. SIO3F4]. | GCA_010672145.1 |
| NEQ51880.1 | LRR-repeats+AP-GTPase+COR+TM+TM*→                                                                                                          | LRR-repeats+AP-GTPase+COR+TM+TM   | 1022 | F6K11_17360 | Cyanobacteria | Leptolyngbya sp. SIO3F4 | GTP-binding protein [Leptolyngbya sp. SIO3F4].                       | GCA_010672145.1 |
| NEQ52141.1 | LRR-repeats+AP-GTPase+COR+TIR*→                                                                                                            | LRR-repeats+AP-GTPase+COR+TIR     | 825  | F6K11_18705 | Cyanobacteria | Leptolyngbya sp. SIO3F4 | GTP-binding protein, partial [Leptolyngbya sp. SIO3F4].              | GCA_010672145.1 |
| NEQ52634.1 | LRR-repeats+AP-GTPase+COR+TIR*→ LRR-repeats→                                                                                               | LRR-repeats+AP-GTPase+COR+TIR     | 827  | F6K11_21260 | Cyanobacteria | Leptolyngbya sp. SIO3F4 | TIR domain-containing protein, partial [Leptolyngbya sp. SIO3F4].    | GCA_010672145.1 |
| NEQ54121.1 | LRR-repeats+AP-GTPase+COR+TIR*→                                                                                                            | LRR-repeats+AP-GTPase+COR+TIR     | 826  | F6K11_28985 | Cyanobacteria | Leptolyngbya sp. SIO3F4 | TIR domain-containing protein, partial [Leptolyngbya sp. SIO3F4].    | GCA_010672145.1 |
| NEQ54707.1 | LRR-repeats+AP-GTPase+COR*→                                                                                                                | LRR-repeats+AP-GTPase+COR         | 547  | F6K11_32030 | Cyanobacteria | Leptolyngbya sp. SIO3F4 | GTP-binding protein, partial [Leptolyngbya sp. SIO3F4].              | GCA_010672145.1 |
| NEQ55863.1 | LRR-repeats+AP-GTPase+COR*→                                                                                                                | LRR-repeats+AP-GTPase+COR         | 335  | F6K11_38165 | Cyanobacteria | Leptolyngbya sp. SIO3F4 | serine/threonine protein kinase, partial [Leptolyngbya sp. SIO3F4].  | GCA_010672145.1 |
| NEQ58292.1 | SIG+TM+TM+TM+TM+TM+TM+TM→?→ ABC-ATPase→<br>ABC-ATPase→?→  <-?  LRR-repeats+AP-GTPase+COR*→?→  <-?<-HNH<-PSE  ?→  <-Cluster5_5clades        | LRR-repeats+AP-GTPase+COR         | 849  | F6K53_13090 | Cyanobacteria | Moorea sp. SIO4A1       | GTPase [Moorea sp. SIO4A1].                                          | GCA_010672065.1 |
| NEQ85055.1 | LRR-repeats+AP-GTPase+COR*→                                                                                                                | LRR-repeats+AP-GTPase+COR         | 554  | F6K26_34455 | Cyanobacteria | Moorea sp. SIO2I5       | GTPase, partial [Moorea sp. SIO2I5].                                 | GCA_010672285.1 |
| NER03418.1 | LRR-repeats+AP-GTPase+COR*→                                                                                                                | LRR-repeats+AP-GTPase+COR         | 738  | F6K17_12770 | Cyanobacteria | Okeania sp. SIO3C4      | GTPase, partial [Okeania sp. SIO3C4].                                | GCA_010672215.1 |
| NER25299.1 | TM+TM+TM+TM+TM+TM→  <-?  ?→ Pkinase→?→ LRR-repeats+AP-GTPase+COR*→ Cluster5_5clades→                                                       | LRR-repeats+AP-GTPase+COR         | 1031 | F6J96_32295 | Cyanobacteria | Symploca sp. SIO1C2     | hypothetical protein F6J96_32295 [Symploca sp. SIO1C2].              | GCA_010672925.1 |





| acc        | operon                                                                                                               | architecture                      | len | gen.name    | taxend                | species                                   | define                                                                       | gca             |
|------------|----------------------------------------------------------------------------------------------------------------------|-----------------------------------|-----|-------------|-----------------------|-------------------------------------------|------------------------------------------------------------------------------|-----------------|
| NET68629.1 | REC→  <-TPR-repeats<-?  LRR-repeats+AP-GTPase+COR+DUF4404*→                                                          | LRR-repeats+AP-GTPase+COR+DUF4404 | 938 | F6K63_31235 | Cyanobacteria         | Moorea sp. SIO1G6                         | GTPase [Moorea sp. SIO1G6].                                                  | GCA_010672795.1 |
| NET73474.1 | LRR-repeats+AP-GTPase+COR+DUF4404*→                                                                                  | LRR-repeats+AP-GTPase+COR+DUF4404 | 821 | F6K62_21805 | Cyanobacteria         | Sphaerospermopsis sp. SIO1G2              | GTP-binding protein, partial [Sphaerospermopsis sp. SIO1G2].                 | GCA_010672725.1 |
| NET83099.1 | REC→  <-?  REC→  <-TPR-repeats  LRR-repeats+AP-GTPase+COR+DUF4404*→                                                  | LRR-repeats+AP-GTPase+COR+DUF4404 | 946 | F6J94_14560 | Cyanobacteria         | Moorea sp. SIO1F2                         | GTPase [Moorea sp. SIO1F2].                                                  | GCA_010672755.1 |
| NEZ62303.1 | PIN→ LRR-repeats→ LRR-repeats+AP-GTPase+COR*→?→ COR+TIR→ SIG+Trypsin+PDZ→                                            | LRR-repeats+AP-GTPase+COR         | 318 | D0962_05850 | Cyanobacteria         | Leptolyngbyaceae cyanobacterium CCMR0082  | hypothetical protein D0962_05850 [Leptolyngbyaceae cyanobacterium CCMR0082]. | GCA_011009535.1 |
| NIM11849.1 | SICOLD→  <-?<-?<-?  ?→ Cluster54_3clades→ Cluster1093_2clades→ LRR-repeats+AP-GTPase+COR*→  <-?<-Cluster2413_2clades | LRR-repeats+AP-GTPase+COR         | 882 | GTO81_07705 | Bacteria              | Candidatus Aminicenantes bacterium        | GTP-binding protein [Candidatus Aminicenantes bacterium].                    | GCA_011771225.1 |
| NIM14508.1 | Aminotran_1_2→  <-?<-Cluster1540_2clades<-?  ?→?→ LRR-repeats+AP-GTPase+COR+TIR*→                                    | LRR-repeats+AP-GTPase+COR+TIR     | 784 | GTO81_21225 | Bacteria              | Candidatus Aminicenantes bacterium        | TIR domain-containing protein [Candidatus Aminicenantes bacterium].          | GCA_011771225.1 |
| NIM17826.1 | LRR-repeats+AP-GTPase+COR*→                                                                                          | LRR-repeats+AP-GTPase+COR         | 952 | GTO81_38090 | Bacteria              | Candidatus Aminicenantes bacterium        | hypothetical protein GTO81_38090 [Candidatus Aminicenantes bacterium].       | GCA_011771225.1 |
| NIN06216.1 | LRR-repeats+AP-GTPase+COR*→                                                                                          | LRR-repeats+AP-GTPase+COR         | 781 | GTO43_07600 | Armatimonadetes       | Armatimonadetes bacterium                 | GTPase, partial [Armatimonadetes bacterium].                                 | GCA_011771945.1 |
| NIP25303.1 | <-SIG+TIMbarrel  LRR-repeats+AP-GTPase+COR+TIR*→                                                                     | LRR-repeats+AP-GTPase+COR+TIR     | 868 | GWO38_16175 | Planctomycetes        | Phycisphaerae bacterium                   | TIR domain-containing protein [Phycisphaerae bacterium].                     | GCA_011774285.1 |
| NIP41904.1 | LRR-repeats+AP-GTPase+COR*→                                                                                          | LRR-repeats+AP-GTPase+COR         | 457 | GWO28_04170 | FCB group             | candidate division Zixibacteria bacterium | GTPase, partial [candidate division Zixibacteria bacterium].                 | GCA_011774485.1 |
| NIR09229.1 | LRR-repeats+AP-GTPase*→ COR→                                                                                         | LRR-repeats+AP-GTPase             | 251 | GTN82_27750 | Bacteria              | Candidatus Aminicenantes bacterium        | GTP-binding protein, partial [Candidatus Aminicenantes bacterium].           | GCA_011773265.1 |
| NIU83786.1 | LRR-repeats+AP-GTPase+COR*→                                                                                          | LRR-repeats+AP-GTPase+COR         | 888 | GWN64_10000 | Asgard group          | Candidatus Thorarchaeota archaeon         | GTPase [Candidatus Thorarchaeota archaeon].                                  | GCA_011775775.1 |
| NJD78109.1 | SAM-methylase→  <-?  ?→?→  <-?  ?→?→ LRR-repeats+AP-GTPase+COR*→                                                     | LRR-repeats+AP-GTPase+COR         | 844 | FIB08_13625 | Euryarchaeota         | Candidatus Methanoperedens sp.            | GTP-binding protein [Candidatus Methanoperedens sp.].                        | GCA_012026835.1 |
| NJK31611.1 | LRR-repeats+AP-GTPase+COR*→                                                                                          | LRR-repeats+AP-GTPase+COR         | 784 | HC927_03900 | Deltaproteobacteria   | Deltaproteobacteria bacterium             | hypothetical protein HC927_03900 [Deltaproteobacteria bacterium].            | GCA_012031025.1 |
| NJK68783.1 | LRR-repeats+AP-GTPase+COR*→?→?→?→?→  <-Pentapeptide-repeats                                                          | LRR-repeats+AP-GTPase+COR         | 637 | HC941_21705 | Cyanobacteria         | Microcoleus sp. SU_5_3                    | GTP-binding protein, partial [Microcoleus sp. SU_5_3].                       | GCA_012030835.1 |
| NJK99654.1 | LRR-repeats+AP-GTPase+COR*→                                                                                          | LRR-repeats+AP-GTPase+COR         | 665 | HC910_03475 | Cyanobacteria         | Spirulinaceae cyanobacterium SM2_1_0      | GTP-binding protein [Spirulinaceae cyanobacterium SM2_1_0].                  | GCA_012031265.1 |
| NJL39962.1 | LRR-repeats+AP-GTPase+COR*→                                                                                          | LRR-repeats+AP-GTPase+COR         | 814 | HC899_26815 | Cyanobacteria         | Leptolyngbyaceae cyanobacterium SM1_4_3   | GTP-binding protein [Leptolyngbyaceae cyanobacterium SM1_4_3].               | GCA_012031415.1 |
| NJL55090.1 | LRR-repeats+AP-GTPase+COR+TIR*→  <-REase-4  ?→ Cluster5_5clades→?→  <-Cluster2398_2clades                            | LRR-repeats+AP-GTPase+COR+TIR     | 879 | HC928_07795 | unclassified Bacteria | bacterium                                 | TIR domain-containing protein [bacterium].                                   | GCA_012031555.1 |
| NJL55819.1 | Cluster1137_2clades→?→ LRR-repeats+AP-GTPase+COR*→ PSE→?→  <-Cluster1102_3clades                                     | LRR-repeats+AP-GTPase+COR         | 671 | HC928_11965 | unclassified Bacteria | bacterium                                 | GTP-binding protein [bacterium].                                             | GCA_012031555.1 |
| NJL58018.1 | LRR-repeats+AP-GTPase+COR*→ COR→                                                                                     | LRR-repeats+AP-GTPase+COR         | 365 | HC928_25050 | unclassified Bacteria | bacterium                                 | hypothetical protein HC928_25050, partial [bacterium].                       | GCA_012031555.1 |
| NJL60049.1 | LRR-repeats+AP-GTPase+COR*→ COR+TIR→                                                                                 | LRR-repeats+AP-GTPase+COR         | 389 | HC887_10835 | Deltaproteobacteria   | Desulfobacteraceae bacterium              | hypothetical protein HC887_10835 [Desulfobacteraceae bacterium].             | GCA_012031825.1 |
| NJL77569.1 | LRR-repeats+AP-GTPase+COR*→                                                                                          | LRR-repeats+AP-GTPase+COR         | 408 | HC892_23555 | Bacteroidetes         | Saprospiraceae bacterium                  | hypothetical protein HC892_23555, partial [Saprospiraceae bacterium].        | GCA_012031785.1 |
| NJL83760.1 | LRR-repeats+AP-GTPase+COR*→                                                                                          | LRR-repeats+AP-GTPase+COR         | 688 | HC890_14000 | Chloroflexi           | Chloroflexaceae bacterium                 | GTP-binding protein [Chloroflexaceae bacterium].                             | GCA_012031815.1 |

| acc        | operon                                                                                                      | architecture                          | len  | gen.name    | taxend        | species                                      | define                                                                                      | gca             |
|------------|-------------------------------------------------------------------------------------------------------------|---------------------------------------|------|-------------|---------------|----------------------------------------------|---------------------------------------------------------------------------------------------|-----------------|
| NJL90622.1 | <-RelE-ParE<-?  LRR-repeats+AP-GTPase+COR*→?→ PSE→?→ PSE→ RNA-Helicase→                                     | LRR-repeats+AP-GTPase+COR             | 1140 | HC916_13170 | Cyanobacteria | Coleofasciculaceae<br>cyanobacterium SM2_1_6 | GTP-binding protein<br>[Coleofasciculaceae cyanobacterium<br>SM2_1_6].                      | GCA_012031635.1 |
| NJL91916.1 | LRR-repeats+AP-GTPase+COR*→?→ HNH→                                                                          | LRR-repeats+AP-GTPase+COR             | 640  | HC916_20640 | Cyanobacteria | Coleofasciculaceae<br>cyanobacterium SM2_1_6 | GTPase, partial [Coleofasciculaceae<br>cyanobacterium SM2_1_6].                             | GCA_012031635.1 |
| NJM60379.1 | <-SIG+TM+TM+TM<-?  TPR-repeats→  <-?<-Cluster5_5clades  ?→?→ LRR-repeats+AP-GTPase+COR*→                    | LRR-repeats+AP-GTPase+COR             | 729  | HC849_09565 | Cyanobacteria | Oscillatoriales<br>cyanobacterium RU_3_3     | hypothetical protein HC849_09565,<br>partial [Oscillatoriales<br>cyanobacterium RU_3_3].    | GCA_012032195.1 |
| NJM78344.1 | LRR-repeats+AP-GTPase+COR*→                                                                                 | LRR-repeats+AP-GTPase+COR             | 500  | HC852_24405 | Cyanobacteria | Acaryochloridaceae<br>cyanobacterium RU_4_10 | hypothetical protein HC852_24405<br>[Acaryochloridaceae cyanobacterium<br>RU_4_10].         | GCA_012032135.1 |
| NJM97967.1 | LRR-repeats→ LRR-repeats+AP-GTPase+COR*→ AP-GTPase+COR+TM+TM→                                               | LRR-repeats+AP-GTPase+COR             | 278  | HC800_13155 | Cyanobacteria | Phormidesmis sp. RL_2_1                      | hypothetical protein HC800_13155<br>[Phormidesmis sp. RL_2_1].                              | GCA_012033015.1 |
| NJN20692.1 | LRR-repeats+AP-GTPase+COR*→ TIR→  <-Cluster5_5clades<-Pentapeptide  REC→                                    | LRR-repeats+AP-GTPase+COR             | 276  | HC812_05240 | Cyanobacteria | Leptolyngbya sp. RL_3_1                      | hypothetical protein HC812_05240,<br>partial [Leptolyngbya sp. RL_3_1].                     | GCA_012032425.1 |
| NJN57594.1 | LRR-repeats+AP-GTPase+COR+TIR*→                                                                             | LRR-repeats+AP-<br>GTPase+COR+TIR     | 1087 | HC879_08885 | Cyanobacteria | Leptolyngbyaceae<br>cyanobacterium SL_5_9    | TIR domain-containing protein<br>[Leptolyngbyaceae cyanobacterium<br>SL_5_9].               | GCA_012032565.1 |
| NJN63246.1 | LRR-repeats+AP-GTPase+COR*→                                                                                 | LRR-repeats+AP-GTPase+COR             | 747  | HC795_18555 | Cyanobacteria | Coleofasciculaceae<br>cyanobacterium RL_1_1  | hypothetical protein HC795_18555,<br>partial [Coleofasciculaceae<br>cyanobacterium RL_1_1]. | GCA_012033105.1 |
| NJN72933.1 | LRR-repeats+AP-GTPase+COR+DUF4404*→  <-?  ?→ SIG+Classical-AAA→                                             | LRR-repeats+AP-<br>GTPase+COR+DUF4404 | 832  | HC799_09060 | Cyanobacteria | Limnothrix sp. RL_2_0                        | GTP-binding protein [Limnothrix<br>sp. RL_2_0].                                             | GCA_012033055.1 |
| NJN75229.1 | LRR-repeats+AP-GTPase→ AP-GTPase*→?→ COR+TM+TM+TM→                                                          | AP-GTPase                             | 180  | HC796_01955 | Cyanobacteria | Synechococcaceae<br>cyanobacterium RL_1_2    | hypothetical protein HC796_01955<br>[Synechococcaceae cyanobacterium<br>RL_1_2].            | GCA_012033095.1 |
| NJN88810.1 | LRR-repeats+AP-GTPase+COR*→                                                                                 | LRR-repeats+AP-GTPase+COR             | 1016 | HC881_24165 | Cyanobacteria | Leptolyngbyaceae<br>cyanobacterium SL_7_1    | GTP-binding protein<br>[Leptolyngbyaceae cyanobacterium<br>SL_7_1].                         | GCA_012032525.1 |
| NJN89941.1 | LRR-repeats+AP-GTPase+COR*→                                                                                 | LRR-repeats+AP-GTPase+COR             | 814  | HC878_05910 | Cyanobacteria | Leptolyngbyaceae<br>cyanobacterium SL_5_14   | GTP-binding protein<br>[Leptolyngbyaceae cyanobacterium<br>SL_5_14].                        | GCA_012032515.1 |
| NJN96139.1 | Cluster1841_2clades→?→ LRR-repeats→ LRR-repeats+AP-GTPase+COR*→ Cluster2316_2clades→ Cluster2224_2clades→?→ | LRR-repeats+AP-GTPase+COR             | 573  | HC875_19545 | Chloroflexi   | Anaerolineales bacterium                     | GTP-binding protein [Anaerolineales<br>bacterium].                                          | GCA_012032575.1 |
| NJO03971.1 | Cluster1087_2clades→  <-?<-?<-ABC-ATPase<br>LRR-repeats+AP-GTPase+COR+EAD7*→                                | LRR-repeats+AP-<br>GTPase+COR+EAD7    | 814  | HC880_21890 | Bacteroidetes | Bacteroidia bacterium                        | hypothetical protein HC880_21890<br>[Bacteroidia bacterium].                                | GCA_012033155.1 |
| NJO04035.1 | LRR-repeats+AP-GTPase+COR+EAD7*→                                                                            | LRR-repeats+AP-<br>GTPase+COR+EAD7    | 843  | HC880_22270 | Bacteroidetes | Bacteroidia bacterium                        | hypothetical protein HC880_22270<br>[Bacteroidia bacterium].                                | GCA_012033155.1 |
| NJO50334.1 | LRR-repeats+AP-GTPase+COR*→                                                                                 | LRR-repeats+AP-GTPase+COR             | 510  | HC840_13875 | Cyanobacteria | Leptolyngbyaceae<br>cyanobacterium RM2_2_4   | GTP-binding protein, partial<br>[Leptolyngbyaceae cyanobacterium<br>RM2_2_4].               | GCA_012033305.1 |
| NJP08786.1 | <-Cluster5_5clades  ?→?→?→?→ LRR-repeats+AP-GTPase+COR*→                                                    | LRR-repeats+AP-GTPase+COR             | 841  | HC866_04300 | Cyanobacteria | Leptolyngbyaceae<br>cyanobacterium RU_5_1    | GTPase [Leptolyngbyaceae<br>cyanobacterium RU_5_1].                                         | GCA_012034055.1 |
| NJR23767.1 | GTPase-AIG→?→?→ LRR-repeats+AP-GTPase+COR+DUF4404*→                                                         | LRR-repeats+AP-<br>GTPase+COR+DUF4404 | 1061 | HC786_17240 | Cyanobacteria | Richelia sp. CSU_2_1                         | GTP-binding protein [Richelia sp.<br>CSU_2_1].                                              | GCA_012034575.1 |
| NJR25667.1 | LRR-repeats+AP-GTPase+COR*→                                                                                 | LRR-repeats+AP-GTPase+COR             | 856  | HC786_27780 | Cyanobacteria | Richelia sp. CSU_2_1                         | hypothetical protein HC786_27780,<br>partial [Richelia sp. CSU_2_1].                        | GCA_012034575.1 |
| NJR41095.1 | LRR-repeats+AP-GTPase+COR+TIR*→                                                                             | LRR-repeats+AP-<br>GTPase+COR+TIR     | 677  | HC781_22475 | Cyanobacteria | Leptolyngbyaceae<br>cyanobacterium CSU_1_4   | GTP-binding protein<br>[Leptolyngbyaceae cyanobacterium<br>CSU_1_4].                        | GCA_012034615.1 |
| NJR68835.1 | <-SIGMA-HTH<-?<-?<-?  ?→ LRR-repeats+AP-GTPase+COR+TCAD1*→?→  <-?<-?<-?  ?→  <-TPR-repeats                  | LRR-repeats+AP-<br>GTPase+COR+TCAD1   | 892  | HC771_09325 | Cyanobacteria | Synechococcales<br>cyanobacterium CRU_2_2    | GTPase [Synechococcales<br>cyanobacterium CRU_2_2].                                         | GCA_012034805.1 |

| acc        | operon                                                                                                                                | architecture                      | len  | gen.name    | taxend              | species                       | define                                                                             | gca             |
|------------|---------------------------------------------------------------------------------------------------------------------------------------|-----------------------------------|------|-------------|---------------------|-------------------------------|------------------------------------------------------------------------------------|-----------------|
| NJS09810.1 | GTPase-AIG→?→?→  <-?<-?  LRR-repeats+AP-GTPase+COR*→?→?→?→?→  <-Pentapeptide-repeats                                                  | LRR-repeats+AP-GTPase+COR         | 761  | HC789_05185 | Cyanobacteria       | Microcoleus sp. CSU_2_2       | GTP-binding protein [Microcoleus sp. CSU_2_2].                                     | GCA_012035135.1 |
| NKC15125.1 | LRR-repeats+AP-GTPase+COR+DrHyd*→                                                                                                     | LRR-repeats+AP-GTPase+COR+DrHyd   | 1164 | GKR94_23910 | Gammaproteobacteria | Gammaproteobacteria bacterium | hypothetical protein GKR94_23910 [Gammaproteobacteria bacterium].                  | GCA_012103455.1 |
| NKQ34928.1 | RelE-ParE→?→?→ PSE→ LRR-repeats+AP-GTPase+COR+EAD7*→                                                                                  | LRR-repeats+AP-GTPase+COR+EAD7    | 553  | HF973_04850 | Chloroflexi         | Chloroflexi bacterium         | hypothetical protein HF973_04850 [Chloroflexi bacterium].                          | GCA_012329075.1 |
| NLT19133.1 | LRR-repeats+AP-GTPase+COR*→                                                                                                           | LRR-repeats+AP-GTPase+COR         | 709  | GXY10_07015 | Firmicutes          | Clostridiales bacterium       | GTP-binding protein, partial [Clostridiales bacterium].                            | GCA_012718845.1 |
| NMF86259.1 | RelE→ CHTH→?→?→  <-?<-?<-?<-?  LRR-repeats+AP-GTPase+COR+TIR*→?→?→  <-?<-?  ?→?→  <-?<-RelE-ParE                                      | LRR-repeats+AP-GTPase+COR+TIR     | 1176 | E1H13_23515 | Cyanobacteria       | Nodosilinea sp. P-1105        | TIR domain-containing protein [Nodosilinea sp. P-1105].                            | GCA_012911975.1 |
| NND77029.1 | LRR-repeats+AP-GTPase+COR*→  <-?<-?<-?<-?<-SIG+TM+TM+TM+TM                                                                            | LRR-repeats+AP-GTPase+COR         | 842  | HKN39_02455 | Bacteroidetes       | Flavobacteriales bacterium    | hypothetical protein HKN39_02455 [Flavobacteriales bacterium].                     | GCA_013002285.1 |
| NOG45111.1 | MORC→?→ LRR-repeats→ LRR-repeats+AP-GTPase+COR*→?→?→  <-?<-?<-BetaPropeller+BetaPropeller                                             | LRR-repeats+AP-GTPase+COR         | 652  | HND50_07765 | Calditrichaeota     | Calditrichaeota bacterium     | hypothetical protein HND50_07765 [Calditrichaeota bacterium].                      | GCA_013112635.1 |
| NOH03519.1 | DAGKIN→ Cluster1917_2clades→?→?→  <-?<-?  LRR-repeats→ PSE→ LRR-repeats+AP-GTPase+COR*→?→?→  <-PSE  ?→  <-?<-GTPase-AIG  Thioredoxin→ | LRR-repeats+AP-GTPase+COR         | 345  | HND47_16930 | Chloroflexi         | Chloroflexi bacterium         | hypothetical protein HND47_16930 [Chloroflexi bacterium].                          | GCA_013112685.1 |
| NOH03560.1 | REase→ LRR-repeats+AP-GTPase+COR→ LRR-repeats+AP-GTPase+COR→                                                                          | LRR-repeats+AP-GTPase+COR         | 878  | HND47_17170 | Chloroflexi         | Chloroflexi bacterium         | hypothetical protein HND47_17170 [Chloroflexi bacterium].                          | GCA_013112685.1 |
| NOH03561.1 | LRR-repeats+AP-GTPase+COR*→                                                                                                           | LRR-repeats+AP-GTPase+COR         | 852  | HND47_17175 | Chloroflexi         | Chloroflexi bacterium         | GTP-binding protein [Chloroflexi bacterium].                                       | GCA_013112685.1 |
| NOH03734.1 | PIN→ PSE→?→?→ LRR-repeats+AP-GTPase+COR*→?→?→?→ PSE→  <-?<-PSE  ?→ Cluster2515_2clades→ Cluster2268_2clades→                          | LRR-repeats+AP-GTPase+COR         | 973  | HND47_18110 | Chloroflexi         | Chloroflexi bacterium         | hypothetical protein HND47_18110 [Chloroflexi bacterium].                          | GCA_013112685.1 |
| NOQ25006.1 | Arginase→ REase→?→?→ LRR-repeats+AP-GTPase+COR+DrHyd*→                                                                                | LRR-repeats+AP-GTPase+COR+DrHyd   | 1054 | GQ564_06545 | Bacteroidetes       | Bacteroidales bacterium       | GTP-binding protein [Bacteroidales bacterium].                                     | GCA_013138975.1 |
| NOQ25654.1 | LRR-repeats+AP-GTPase+COR*→ FGS→ PSE→?→?→  <-?<-?<-REC                                                                                | LRR-repeats+AP-GTPase+COR         | 1082 | GQ564_09870 | Bacteroidetes       | Bacteroidales bacterium       | GTP-binding protein [Bacteroidales bacterium].                                     | GCA_013138975.1 |
| NOQ25870.1 | LRR-repeats+AP-GTPase+COR*→ Cluster881_3clades→ Polbeta+HEPN→  <-?<-Cluster998_2clades<-?<-RADICAL-SAM                                | LRR-repeats+AP-GTPase+COR         | 983  | GQ564_10955 | Bacteroidetes       | Bacteroidales bacterium       | GTP-binding protein [Bacteroidales bacterium].                                     | GCA_013138975.1 |
| NOQ35071.1 | LRR-repeats+AP-GTPase+COR*→                                                                                                           | LRR-repeats+AP-GTPase+COR         | 779  | GQ569_04160 | Gammaproteobacteria | Methylococcaceae bacterium    | hypothetical protein GQ569_04160 [Methylococcaceae bacterium].                     | GCA_013138855.1 |
| NOQ64054.1 | LRR-repeats+AP-GTPase+COR+DrHyd*→                                                                                                     | LRR-repeats+AP-GTPase+COR+DrHyd   | 751  | GQ582_06035 | Gammaproteobacteria | Methyloprofundus sp.          | hypothetical protein GQ582_06035 [Methyloprofundus sp.].                           | GCA_013138595.1 |
| NOR78337.1 | LRR-repeats+AP-GTPase+COR*→                                                                                                           | LRR-repeats+AP-GTPase+COR         | 537  | GQ523_07950 | Euryarchaeota       | Methanophagales archaeon      | GTP-binding protein, partial [Methanophagales archaeon].                           | GCA_013139985.1 |
| NOS87464.1 | LRR-repeats+AP-GTPase+COR+TIR*→                                                                                                       | LRR-repeats+AP-GTPase+COR+TIR     | 972  | HOP34_02800 | Gammaproteobacteria | Methylococcaceae bacterium    | TIR domain-containing protein [Methylococcaceae bacterium].                        | GCA_013140465.1 |
| NOT10704.1 | Cluster2349_2clades→ PSE→?→ LRR-repeats+AP-GTPase+COR*→                                                                               | LRR-repeats+AP-GTPase+COR         | 810  | HOP23_02545 | Gammaproteobacteria | Methylococcaceae bacterium    | hypothetical protein HOP23_02545 [Methylococcaceae bacterium].                     | GCA_013140705.1 |
| NOT87605.1 | PNPase→?→ LRR-repeats+AP-GTPase+COR+TIR*→                                                                                             | LRR-repeats+AP-GTPase+COR+TIR     | 1152 | HOP03_05430 | Gammaproteobacteria | Lysobacter sp.                | TIR domain-containing protein [Lysobacter sp.].                                    | GCA_013141175.1 |
| NOU20113.1 | SIGMA-HTH→?→ LRR-repeats+AP-GTPase+COR+DrHyd*→ LRR-repeats+AP-GTPase+COR+DrHyd→                                                       | LRR-repeats+AP-GTPase+COR+DrHyd   | 1204 | HOO91_21360 | Bacteroidetes       | Bacteroidales bacterium       | hypothetical protein HOO91_21360 [Bacteroidales bacterium].                        | GCA_013141385.1 |
| NOU47191.1 | LRR-repeats+AP-GTPase+COR*→                                                                                                           | LRR-repeats+AP-GTPase+COR         | 693  | HOO86_09030 | Bacteroidetes       | Bacteroidales bacterium       | GTP-binding protein [Bacteroidales bacterium].                                     | GCA_013141455.1 |
| NOZ36014.1 | Cluster1478_2clades→?→?→?→?→ LRR-repeats+AP-GTPase+COR*→  <-?<-?  ?→?→ D5ATPase→                                                      | LRR-repeats+AP-GTPase+COR         | 842  | GXO80_12040 | Chlorobi            | Chlorobi bacterium            | GTP-binding protein [Chlorobi bacterium].                                          | GCA_013152535.1 |
| NQT12774.1 | LRR-repeats+AP-GTPase+COR+DUF4404*→                                                                                                   | LRR-repeats+AP-GTPase+COR+DUF4404 | 936  | HQ582_08495 | Planctomycetes      | Planctomycetes bacterium      | leucine-rich repeat domain-containing protein, partial [Planctomycetes bacterium]. | GCA_013202485.1 |
| NQT13736.1 | LRR-repeats+AP-GTPase+COR*→ TIR→                                                                                                      | LRR-repeats+AP-GTPase+COR         | 583  | HQ582_13365 | Planctomycetes      | Planctomycetes bacterium      | hypothetical protein HQ582_13365, partial [Planctomycetes bacterium].              | GCA_013202485.1 |

| acc        | operon                                                                                                                  | architecture                      | len  | gen.name     | taxend                | species                              | define                                                                        | gca             |
|------------|-------------------------------------------------------------------------------------------------------------------------|-----------------------------------|------|--------------|-----------------------|--------------------------------------|-------------------------------------------------------------------------------|-----------------|
| NQT64030.1 | TM+TM+TM→?→?→?→?→ SIG+LRR-repeats+AP-GTPase+COR+TIR*→                                                                   | SIG+LRR-repeats+AP-GTPase+COR+TIR | 1188 | HQ556_13800  | FCB group             | Candidatus Marinimicrobia bacterium  | TIR domain-containing protein [Candidatus Marinimicrobia bacterium].          | GCA_013202495.1 |
| NQT91808.1 | LRR-repeats+AP-GTPase+COR+DUF4404*→                                                                                     | LRR-repeats+AP-GTPase+COR+DUF4404 | 843  | HQ559_03535  | Lentisphaerae         | Lentisphaerae bacterium              | serine/threonine protein kinase [Lentisphaerae bacterium].                    | GCA_013202215.1 |
| NQU06371.1 | LRR-repeats+AP-GTPase+COR*→                                                                                             | LRR-repeats+AP-GTPase+COR         | 749  | HQ568_09785  | Calditrichaeota       | Calditrichaeota bacterium            | GTP-binding protein [Calditrichaeota bacterium].                              | GCA_013202805.1 |
| NQU20766.1 | LRR-repeats+AP-GTPase+COR+TIR*→                                                                                         | LRR-repeats+AP-GTPase+COR+TIR     | 813  | HQ567_05735  | Bacteria              | Candidatus Neelsonbacteria bacterium | TIR domain-containing protein [Candidatus Neelsonbacteria bacterium].         | GCA_013202865.1 |
| NQU25297.1 | LRR-repeats+AP-GTPase+COR*→ TIR→                                                                                        | LRR-repeats+AP-GTPase+COR         | 608  | HQ567_28770  | Bacteria              | Candidatus Neelsonbacteria bacterium | hypothetical protein HQ567_28770 [Candidatus Neelsonbacteria bacterium].      | GCA_013202865.1 |
| NQU51997.1 | LRR-repeats+AP-GTPase+COR+TIR*→                                                                                         | LRR-repeats+AP-GTPase+COR+TIR     | 946  | HQ522_05615  | Bacteroidetes         | Bacteroidetes bacterium              | leucine-rich repeat domain-containing protein [Bacteroidetes bacterium].      | GCA_013203755.1 |
| NQU93487.1 | RVT→ LRR-repeats+AP-GTPase+COR+TIR*→?→?→ TM+TM+TM→                                                                      | LRR-repeats+AP-GTPase+COR+TIR     | 903  | HQ540_23735  | Bacteroidetes         | Bacteroidetes bacterium              | TIR domain-containing protein [Bacteroidetes bacterium].                      | GCA_013203545.1 |
| NQY23053.1 | S4→?→?→?→?→ LRR-repeats+AP-GTPase+COR+DrHyd*→  <-?<-Cluster1695_2clades  TraJ-RHH→ RelE-ParE→?→?→ ACET→                 | LRR-repeats+AP-GTPase+COR+DrHyd   | 962  | HRT41_03420  | Epsilonproteobacteria | Campylobacteraceae bacterium         | leucine-rich repeat domain-containing protein [Campylobacteraceae bacterium]. | GCA_013215945.1 |
| NQZ07155.1 | GDSL→ Cluster2260_2clades→ LRR-repeats+AP-GTPase+COR+E59-ABC*→?→ RelE→ CHTH→                                            | LRR-repeats+AP-GTPase+COR+E59-ABC | 1302 | HRT35_08335  | Gammaproteobacteria   | Algicola sp.                         | leucine-rich repeat domain-containing protein [Algicola sp.].                 | GCA_013216025.1 |
| NQZ07918.1 | LRR-repeats+AP-GTPase+COR*→                                                                                             | LRR-repeats+AP-GTPase+COR         | 815  | HRT35_12215  | Gammaproteobacteria   | Algicola sp.                         | GTP-binding protein [Algicola sp.].                                           | GCA_013216025.1 |
| NQZ09239.1 | <-MNS-STAND+CR-REase3  LRR-repeats+AP-GTPase+COR*→ Cluster5_5clades→                                                    | LRR-repeats+AP-GTPase+COR         | 1075 | HRT35_18935  | Gammaproteobacteria   | Algicola sp.                         | leucine-rich repeat domain-containing protein [Algicola sp.].                 | GCA_013216025.1 |
| NQZ10194.1 | LRR-repeats+AP-GTPase+COR+TIR*→?→  <-?<-HSP70                                                                           | LRR-repeats+AP-GTPase+COR+TIR     | 972  | HRT35_23840  | Gammaproteobacteria   | Algicola sp.                         | TIR domain-containing protein [Algicola sp.].                                 | GCA_013216025.1 |
| NQZ62063.1 | Cluster1136_2clades→?→  <-?  LRR-repeats+AP-GTPase+COR*→                                                                | LRR-repeats+AP-GTPase+COR         | 829  | HRT59_07970  | Cyanobacteria         | Crocospaera sp.                      | leucine-rich repeat domain-containing protein [Crocospaera sp.].              | GCA_013215395.1 |
| NQZ63007.1 | LRR-repeats+AP-GTPase+COR*→                                                                                             | LRR-repeats+AP-GTPase+COR         | 689  | HRT59_12970  | Cyanobacteria         | Crocospaera sp.                      | leucine-rich repeat domain-containing protein, partial [Crocospaera sp.].     | GCA_013215395.1 |
| NRA27019.1 | FGS→?→ FGS→ RVT→ FGS→ LRR-repeats+AP-GTPase+COR*→  <-?<-nSTAND3+REase-DUF4143<-trRNA<-?  Pro_CA→  <-Cluster1292_2clades | LRR-repeats+AP-GTPase+COR         | 859  | HRU10_07210  | Verrucomicrobia       | Opitutales bacterium                 | hypothetical protein HRU10_07210 [Opitutales bacterium].                      | GCA_013215165.1 |
| NRT54298.1 | LRR-repeats+AP-GTPase+COR+TIR*→  <-?<-ABC_membrane+ABC_tran  Cyanophycinsyn-ATPgrasp→ Cyanophycinsyn-ATPgrasp→          | LRR-repeats+AP-GTPase+COR+TIR     | 788  | HNQ01_000005 | Betaproteobacteria    | Leptothrix sp. C29                   | internalin A [Leptothrix sp. C29].                                            | GCA_013294065.1 |
| NTV46488.1 | LRR-repeats+AP-GTPase+COR+TIR*→                                                                                         | LRR-repeats+AP-GTPase+COR+TIR     | 657  | HGB11_08225  | Chlorobi              | Chlorobiales bacterium               | TIR domain-containing protein, partial [Chlorobiales bacterium].              | GCA_013334725.1 |
| NTV66504.1 | LRR-repeats+AP-GTPase+COR+TIR*→?→?→?→ PurT-ATPgrasp→                                                                    | LRR-repeats+AP-GTPase+COR+TIR     | 755  | HGB06_02250  | Chlorobi              | Chlorobaculum sp.                    | TIR domain-containing protein [Chlorobaculum sp.].                            | GCA_013334855.1 |
| NTV67443.1 | REase→  <-?<-SIG+TM  LRR-repeats+AP-GTPase+COR*→                                                                        | LRR-repeats+AP-GTPase+COR         | 453  | HGB06_07145  | Chlorobi              | Chlorobaculum sp.                    | hypothetical protein HGB06_07145 [Chlorobaculum sp.].                         | GCA_013334855.1 |
| NTW50168.1 | LRR-repeats+AP-GTPase+COR+TIR*→                                                                                         | LRR-repeats+AP-GTPase+COR+TIR     | 839  | HGB19_10655  | Chlorobi              | Chlorobiales bacterium               | TIR domain-containing protein [Chlorobiales bacterium].                       | GCA_013334605.1 |
| NTW54860.1 | LRR-repeats+AP-GTPase+COR*→?→?→?→?→?→?→ Cluster2062_2clades→                                                            | LRR-repeats+AP-GTPase+COR         | 1090 | HGB15_08930  | Chlorobi              | Chlorobaculum sp.                    | hypothetical protein HGB15_08930 [Chlorobaculum sp.].                         | GCA_013334655.1 |
| NTW70387.1 | DAM→ LRR-repeats+AP-GTPase+COR+TIR*→                                                                                    | LRR-repeats+AP-GTPase+COR+TIR     | 876  | HGB23_11195  | Chlorobi              | Chlorobiaceae bacterium              | TIR domain-containing protein [Chlorobiaceae bacterium].                      | GCA_013334485.1 |

| acc        | operon                                                                                                            | architecture                          | len  | gen.name    | taxend              | species                           | define                                                                                | gca             |
|------------|-------------------------------------------------------------------------------------------------------------------|---------------------------------------|------|-------------|---------------------|-----------------------------------|---------------------------------------------------------------------------------------|-----------------|
| NTW83729.1 | <-NUDIX  ?->?-> LRR-repeats+AP-GTPase+COR+TIR*->                                                                  | LRR-repeats+AP-GTPase+COR+TIR         | 892  | HGB36_10245 | Chlorobi            | Chlorobiaceae bacterium           | TIR domain-containing protein [Chlorobiaceae bacterium].                              | GCA_013334225.1 |
| NUM66201.1 | SHS2-> LRR-repeats+AP-GTPase+COR*->?->?-> Cluster1134_2clades-> SNF->                                             | LRR-repeats+AP-GTPase+COR             | 1051 | HUU39_13110 | Bacteria            | candidate division KSB1 bacterium | hypothetical protein HUU39_13110 [candidate division KSB1 bacterium].                 | GCA_013359425.1 |
| NUM68318.1 | LRR-repeats+AP-GTPase+COR*->?->?-> FGS->                                                                          | LRR-repeats+AP-GTPase+COR             | 955  | HUU39_24115 | Bacteria            | candidate division KSB1 bacterium | leucine-rich repeat domain-containing protein [candidate division KSB1 bacterium].    | GCA_013359425.1 |
| NUO01599.1 | <-S18-HTH<-Cluster1004_3clades<-?<-?<-?  FGS-> LRR-repeats+_AP-GTPase+COR+EAD11+TIR*-> FGS->                      | LRR-repeats+_AP-GTPase+COR+EAD11+TIR  | 1085 | HUU01_13415 | Bacteroidetes       | Saprospiraceae bacterium          | TIR domain-containing protein [Saprospiraceae bacterium].                             | GCA_013361075.1 |
| NUO02098.1 | LRR-repeats+AP-GTPase+COR+TM+TM+TM*->?->  <-Cluster2427_2clades                                                   | LRR-repeats+AP-GTPase+COR+TM+TM+TM    | 791  | HUU01_15950 | Bacteroidetes       | Saprospiraceae bacterium          | hypothetical protein HUU01_15950, partial [Saprospiraceae bacterium].                 | GCA_013361075.1 |
| NUO79752.1 | SIG+7TMR-DISMED1->  <-?<-?  LRR-repeats+AP-GTPase+COR+TIR*->  <-Cluster2261_2clades<-RlaP  SIG+TIMbarrel->        | LRR-repeats+AP-GTPase+COR+TIR         | 968  | HUU05_06725 | Bacteria            | candidate division KSB1 bacterium | leucine-rich repeat domain-containing protein [candidate division KSB1 bacterium].    | GCA_013361015.1 |
| NUO80023.1 | ABhydrolase->?-> Cluster1134_2clades->?-> LRR-repeats+AP-GTPase+COR*->                                            | LRR-repeats+AP-GTPase+COR             | 824  | HUU05_08095 | Bacteria            | candidate division KSB1 bacterium | leucine-rich repeat domain-containing protein [candidate division KSB1 bacterium].    | GCA_013361015.1 |
| NUO97795.1 | LRR-repeats+AP-GTPase+COR*->                                                                                      | LRR-repeats+AP-GTPase+COR             | 986  | HOW59_07675 | Actinobacteria      | Nonomurea sp.                     | hypothetical protein HOW59_07675, partial [Nonomurea sp.].                            | GCA_013361365.1 |
| NUP68620.1 | LRR-repeats+AP-GTPase+COR*->                                                                                      | LRR-repeats+AP-GTPase+COR             | 1447 | HOW71_41335 | Actinobacteria      | Nonomurea sp.                     | hypothetical protein HOW71_41335 [Nonomurea sp.].                                     | GCA_013361665.1 |
| NUQ24465.1 | FGS->?->  <-?  EAD11+LRR-repeats+S1+S1+AP-GTPase+COR*->                                                           | EAD11+LRR-repeats+S1+S1+AP-GTPase+COR | 1140 | HUU34_10980 | Bacteroidetes       | Saprospiraceae bacterium          | leucine-rich repeat domain-containing protein [Saprospiraceae bacterium].             | GCA_013360405.1 |
| NUQ25704.1 | PIN-> FGS->?-> RVT->?-> LRR-repeats+AP-GTPase+COR+TIR*->?->?->?-> TM+TM+TM->                                      | LRR-repeats+AP-GTPase+COR+TIR         | 826  | HUU34_17280 | Bacteroidetes       | Saprospiraceae bacterium          | TIR domain-containing protein [Saprospiraceae bacterium].                             | GCA_013360405.1 |
| NUQ26825.1 | LRR-repeats+AP-GTPase+COR+TM*-> FGS->                                                                             | LRR-repeats+AP-GTPase+COR+TM          | 924  | HUU34_23015 | Bacteroidetes       | Saprospiraceae bacterium          | hypothetical protein HUU34_23015 [Saprospiraceae bacterium].                          | GCA_013360405.1 |
| NUQ46249.1 | LRR-repeats+AP-GTPase+COR*-> ABC_membrane+ABC_tran->                                                              | LRR-repeats+AP-GTPase+COR             | 843  | HUU22_09465 | Planctomycetes      | Phycisphaerae bacterium           | leucine-rich repeat domain-containing protein, partial [Phycisphaerae bacterium].     | GCA_013360645.1 |
| NUQ73394.1 | LRR-repeats+AP-GTPase+COR+TM+TM*->                                                                                | LRR-repeats+AP-GTPase+COR+TM+TM       | 869  | HUU21_07550 | Deltaproteobacteria | Polyangiaceae bacterium           | GTP-binding protein [Polyangiaceae bacterium].                                        | GCA_013360665.1 |
| NUQ87064.1 | LRR-repeats+AP-GTPase+COR*->                                                                                      | LRR-repeats+AP-GTPase+COR             | 767  | HOQ43_01165 | Actinobacteria      | Glycomyces artemisiae             | hypothetical protein HOQ43_01165 [Glycomyces artemisiae].                             | GCA_013361895.1 |
| NUR27723.1 | REC->?->?->?-> LRR-repeats+AP-GTPase+COR*->                                                                       | LRR-repeats+AP-GTPase+COR             | 958  | HOV83_18080 | Actinobacteria      | Catenulispora sp.                 | hypothetical protein HOV83_18080 [Catenulispora sp.].                                 | GCA_013362085.1 |
| NUS08684.1 | LRR-repeats+AP-GTPase+COR*->                                                                                      | LRR-repeats+AP-GTPase+COR             | 1447 | HOV97_39690 | Actinobacteria      | Nonomurea sp.                     | hypothetical protein HOV97_39690 [Nonomurea sp.].                                     | GCA_013362305.1 |
| NVM16177.1 | LRR-repeats+AP-GTPase+COR*->                                                                                      | LRR-repeats+AP-GTPase+COR             | 1327 | HWN80_00570 | Asgard group        | Candidatus Lokiarchaeota archaeon | leucine-rich repeat protein [Candidatus Lokiarchaeota archaeon].                      | GCA_013375495.1 |
| NVM57338.1 | LRR-repeats+AP-GTPase+COR*->                                                                                      | LRR-repeats+AP-GTPase+COR             | 588  | HWN51_04390 | Deltaproteobacteria | Desulfobacterales bacterium       | leucine-rich repeat domain-containing protein, partial [Desulfobacterales bacterium]. | GCA_013375265.1 |
| NVO09292.1 | <-SIG+TM+VWA+TM<-SIG+TM+VWA+TM<-?<-VWA<-?<-MoxR-AAA  ?-> LRR-repeats+AP-GTPase+COR*->?->?->?->  <-?<-?<-?  DSBH-> | LRR-repeats+AP-GTPase+COR             | 965  | HXX16_04945 | Bacteroidetes       | Bacteroidales bacterium           | leucine-rich repeat domain-containing protein [Bacteroidales bacterium].              | GCA_013376985.1 |

| acc        | operon                                                                                                           | architecture                      | len  | gen.name    | taxend              | species                                            | define                                                                                    | gca             |
|------------|------------------------------------------------------------------------------------------------------------------|-----------------------------------|------|-------------|---------------------|----------------------------------------------------|-------------------------------------------------------------------------------------------|-----------------|
| NZD48025.1 | LRR-repeats+AP-GTPase+COR+TIR*→  <?<-ABC_membrane+ABC_tran  Cyanophycinsyn-ATPgrasp→ Cyanophycinsyn-ATPgrasp→    | LRR-repeats+AP-GTPase+COR+TIR     | 885  | HZU84_19525 | Betaproteobacteria  | Sphaerotilus natans subsp. sulfidivorans           | leucine-rich repeat domain-containing protein [Sphaerotilus natans subsp. sulfidivorans]. | GCA_013426975.1 |
| OAB01099.1 | LRR-repeats+AP-GTPase+COR*→  <?  ?→  <?<-SIGMA-HTH<-SIGMA-HTH                                                    | LRR-repeats+AP-GTPase+COR         | 996  | A6P39_08275 | Actinobacteria      | Streptomyces sp. FXJ1.172                          | hypothetical protein A6P39_08275 [Streptomyces sp. FXJ1.172].                             | GCA_001636945.1 |
| OAI12102.1 | Cluster5_5clades→?→?→ HTH→ LRR-repeats+AP-GTPase+COR+TIR*→ Cluster1019_2clades→?→  <?<-?<-?  Cluster833_2clades→ | LRR-repeats+AP-GTPase+COR+TIR     | 1065 | A1507_19115 | Gammaproteobacteria | Methylomonas koyamae                               | hypothetical protein A1507_19115 [Methylomonas koyamae].                                  | GCA_001644135.1 |
| OBQ24605.1 | S18-HTH→?→  <-tRNA  Ferredoxin-betagrasp→?→?→ LRR-repeats+AP-GTPase+COR*→?→  <-?  TM→                            | LRR-repeats+AP-GTPase+COR         | 1095 | AN488_00160 | Cyanobacteria       | Anabaena sp. WA113                                 | GTPase [Anabaena sp. WA113].                                                              | GCA_001672155.1 |
| OBQ25153.1 | LRR-repeats+AP-GTPase+COR*→?→  <-?  TM→                                                                          | LRR-repeats+AP-GTPase+COR         | 780  | AN481_11440 | Cyanobacteria       | Aphanizomenon flos-aquae LD13                      | hypothetical protein AN481_11440, partial [Aphanizomenon flos-aquae LD13].                | GCA_001672165.1 |
| OBQ31054.1 | S18-HTH→?→  <-tRNA  Ferredoxin-betagrasp→?→?→ LRR-repeats+AP-GTPase+COR*→?→  <-?  TM→                            | LRR-repeats+AP-GTPase+COR         | 942  | AN483_02530 | Cyanobacteria       | Aphanizomenon flos-aquae MDT14a                    | hypothetical protein AN483_02530 [Aphanizomenon flos-aquae MDT14a].                       | GCA_001672095.1 |
| OBQ35403.1 | LRR-repeats+AP-GTPase+COR*→  <-?<-sGTP+sGTP  ?→  <-REC                                                           | LRR-repeats+AP-GTPase+COR         | 799  | AN487_15705 | Cyanobacteria       | Anabaena sp. CRKS33                                | hypothetical protein AN487_15705, partial [Anabaena sp. CRKS33].                          | GCA_001672075.1 |
| OBQ36155.1 | LRR-repeats+AP-GTPase+COR*→                                                                                      | LRR-repeats+AP-GTPase+COR         | 567  | AN484_25870 | Cyanobacteria       | Aphanizomenon flos-aquae WA102                     | GTPase, partial [Aphanizomenon flos-aquae WA102].                                         | GCA_001672105.1 |
| OCQ90934.1 | LRR-repeats+AP-GTPase+COR→ LRR-repeats+AP-GTPase+COR→?→ LRR-repeats+AP-GTPase+COR→                               | LRR-repeats+AP-GTPase+COR         | 795  | BCR12_04520 | Cyanobacteria       | Limnothrix sp. P13C2                               | hypothetical protein BCR12_04520 [Limnothrix sp. P13C2].                                  | GCA_001698445.1 |
| OCQ90935.1 | LRR-repeats+AP-GTPase+COR*→                                                                                      | LRR-repeats+AP-GTPase+COR         | 952  | BCR12_04525 | Cyanobacteria       | Limnothrix sp. P13C2                               | hypothetical protein BCR12_04525 [Limnothrix sp. P13C2].                                  | GCA_001698445.1 |
| OCQ97014.1 | TPR-repeats→?→?→ CASPASE+TM+TPR→?→?→?→ LRR-repeats+AP-GTPase+COR+DUF4404*→  <-?<-?  ?→  <-?  REC→                | LRR-repeats+AP-GTPase+COR+DUF4404 | 833  | BCD64_15615 | Cyanobacteria       | Nostoc sp. MBR 210                                 | GTP-binding protein [Nostoc sp. MBR 210].                                                 | GCA_001698435.1 |
| OCR00628.1 | LRR-repeats+AP-GTPase+COR+TM+TM*→  <-?<-?  ?→  <-?  ?→  <-PRTase<-SIG+TM+TM+TM+TM                                | LRR-repeats+AP-GTPase+COR+TM+TM   | 689  | BCD67_11660 | Cyanobacteria       | Oscillatoriales cyanobacterium USR001              | GTPase, partial [Oscillatoriales cyanobacterium USR001].                                  | GCA_001698425.1 |
| OCW73618.1 | LRR-repeats+AP-GTPase+COR*→                                                                                      | LRR-repeats+AP-GTPase+COR         | 918  | A4G24_00320 | Bacteroidetes       | Elizabethkingia anophelis                          | hypothetical protein A4G24_00320 [Elizabethkingia anophelis].                             | GCA_001703835.1 |
| ODG98072.1 | LRR-repeats+AP-GTPase+COR+TIR*→  <-CASPASE+TM                                                                    | LRR-repeats+AP-GTPase+COR+TIR     | 858  | A4S05_10875 | Cyanobacteria       | Nostoc sp. KVJ20                                   | hypothetical protein A4S05_10875, partial [Nostoc sp. KVJ20].                             | GCA_001712795.1 |
| ODS35505.1 | Cluster846_3clades→ LRR-repeats→ LRR-repeats+AP-GTPase+COR*→?→ VWa→                                              | LRR-repeats+AP-GTPase+COR         | 644  | A7316_10690 | DPANN group         | Candidatus Altiarchaeales archaeon WOR_SM1_86-2    | hypothetical protein A7316_10690 [Candidatus Altiarchaeales archaeon WOR_SM1_86-2].       | GCA_001723855.1 |
| ODS40288.1 | LRR-repeats+AP-GTPase+CASPASE*→                                                                                  | LRR-repeats+AP-GTPase+CASPASE     | 811  | A7315_09000 | DPANN group         | Candidatus Altiarchaeales archaeon WOR_SM1_79      | hypothetical protein A7315_09000 [Candidatus Altiarchaeales archaeon WOR_SM1_79].         | GCA_001723835.1 |
| OED06513.1 | LRR-repeats+AP-GTPase+COR*→                                                                                      | LRR-repeats+AP-GTPase+COR         | 666  | A9239_11540 | Euryarchaeota       | Methanosarcina sp. A14                             | hypothetical protein A9239_11540 [Methanosarcina sp. A14].                                | GCA_001729375.1 |
| OEU63639.1 | LRR-repeats→ LRR-repeats+AP-GTPase+COR*→                                                                         | LRR-repeats+AP-GTPase+COR         | 623  | BBJ57_05215 | Deltaproteobacteria | Desulfobacterales bacterium PC51MH44               | hypothetical protein BBJ57_05215 [Desulfobacterales bacterium PC51MH44].                  | GCA_001751165.1 |
| OFX48341.1 | ABC-ATPase→?→ LRR-repeats+AP-GTPase+COR*→                                                                        | LRR-repeats+AP-GTPase+COR         | 720  | A2X10_07060 | Bacteroidetes       | Bacteroidetes bacterium GWA2_33_15                 | hypothetical protein A2X10_07060 [Bacteroidetes bacterium GWA2_33_15].                    | GCA_001769045.1 |
| OFX79107.1 | LRR-repeats+AP-GTPase+COR+REase7*→                                                                               | LRR-repeats+AP-GTPase+COR+REase7  | 1101 | A2X12_10435 | Bacteroidetes       | Bacteroidetes bacterium GWE2_29_8                  | hypothetical protein A2X12_10435 [Bacteroidetes bacterium GWE2_29_8].                     | GCA_001769085.1 |
| OFY84271.1 | LRR-repeats→ LRR-repeats+AP-GTPase+COR+REase7*→                                                                  | LRR-repeats+AP-GTPase+COR+REase7  | 598  | A3F72_14720 | Bacteroidetes       | Bacteroidetes bacterium RIFC-SPLOWO2_12_FULL_35_15 | hypothetical protein A3F72_14720 [Bacteroidetes bacterium RIFC-SPLOWO2_12_FULL_35_15].    | GCA_001769385.1 |

| acc        | operon                                                                                                           | architecture                                | len  | gen.name    | taxend              | species                                                      | define                                                                                           | gca             |
|------------|------------------------------------------------------------------------------------------------------------------|---------------------------------------------|------|-------------|---------------------|--------------------------------------------------------------|--------------------------------------------------------------------------------------------------|-----------------|
| OGC77574.1 | LRR-repeats+AP-GTPase+COR*→?→  <?<-CCTBP                                                                         | LRR-repeats+AP-GTPase+COR                   | 975  | A2Z27_00115 | FCB group           | candidate division<br>Zixibacteria bacterium<br>RBG_16_50_21 | hypothetical protein A2Z27_00115<br>[candidate division Zixibacteria<br>bacterium RBG_16_50_21]. | GCA_001773465.1 |
| OGH99179.1 | LRR-repeats+AP-GTPase+COR*→                                                                                      | LRR-repeats+AP-GTPase+COR                   | 572  | A2X43_07200 | Terrabacteria group | Candidatus<br>Margulisbacteria bacterium<br>GWD2_39_127      | hypothetical protein A2X43_07200<br>[Candidatus Margulisbacteria<br>bacterium GWD2_39_127].      | GCA_001783265.1 |
| OGV70404.1 | Pkinase+LRR-repeats+AP-GTPase+COR+TM+TM*→                                                                        | Pkinase+LRR-repeats+AP-<br>GTPase+COR+TM+TM | 1157 | A2283_19020 | Lentisphaerae       | Lentisphaerae bacterium<br>RI-<br>FOXYA12_FULL_48_11         | hypothetical protein A2283_19020<br>[Lentisphaerae bacterium<br>RI-<br>RIFOXYA12_FULL_48_11].    | GCA_001804885.1 |
| OHB50686.1 | S1COLD→ LRR-repeats+AP-GTPase+COR+TIR*→                                                                          | LRR-repeats+AP-<br>GTPase+COR+TIR           | 953  | A2Y10_02350 | Planctomycetes      | Planctomycetes bacterium<br>GWF2_41_51                       | hypothetical protein A2Y10_02350<br>[Planctomycetes bacterium<br>GWF2_41_51].                    | GCA_001825665.1 |
| OHB52204.1 | LRR-repeats+AP-GTPase+COR*→?→  <?  SIG+TM→                                                                       | LRR-repeats+AP-GTPase+COR                   | 1147 | A2Y10_11365 | Planctomycetes      | Planctomycetes bacterium<br>GWF2_41_51                       | hypothetical protein A2Y10_11365<br>[Planctomycetes bacterium<br>GWF2_41_51].                    | GCA_001825665.1 |
| OHB64560.1 | REC→ TPR-repeats→  <?  PSE→  <?<-?<-?  YBAK→ LRR-repeats+AP-GTPase+COR+DUF4404*→                                 | LRR-repeats+AP-<br>GTPase+COR+DUF4404       | 740  | A2Y76_11060 | Planctomycetes      | Planctomycetes bacterium<br>RBG_13_60_9                      | hypothetical protein A2Y76_11060<br>[Planctomycetes bacterium<br>RBG_13_60_9].                   | GCA_001824685.1 |
| OHD05988.1 | LRR-repeats+AP-GTPase+COR+TM+TM*→ TraJ-RHH→ RelE-ParE→                                                           | LRR-repeats+AP-<br>GTPase+COR+TM+TM         | 1257 | A2Z98_10570 | Spirochaetes        | Spirochaetes bacterium<br>GWB1_27_13                         | hypothetical protein A2Z98_10570<br>[Spirochaetes bacterium<br>GWB1_27_13].                      | GCA_001829125.1 |
| OHD18029.1 | MORC→?→?→?→  <?<-PSE<-?  LRR-repeats+AP-GTPase+COR→  <-?<-?<-?  ?→?→?→?→ REC→  <-LRR-repeats+AP-GTPase+COR+DrHyd | LRR-repeats+AP-GTPase+COR                   | 1064 | A2Z98_11125 | Spirochaetes        | Spirochaetes bacterium<br>GWB1_27_13                         | hypothetical protein A2Z98_11125<br>[Spirochaetes bacterium<br>GWB1_27_13].                      | GCA_001829125.1 |
| OHD18038.1 | LRR-repeats+AP-GTPase+COR+DrHyd*→                                                                                | LRR-repeats+AP-<br>GTPase+COR+DrHyd         | 986  | A2Z98_11170 | Spirochaetes        | Spirochaetes bacterium<br>GWB1_27_13                         | hypothetical protein A2Z98_11170<br>[Spirochaetes bacterium<br>GWB1_27_13].                      | GCA_001829125.1 |
| OHD26231.1 | LRR-repeats+AP-GTPase+COR+TM+TM*→ TraJ-RHH→ RelE-ParE→                                                           | LRR-repeats+AP-<br>GTPase+COR+TM+TM         | 1234 | A2Y34_11235 | Spirochaetes        | Spirochaetes bacterium<br>GWC1_27_15                         | hypothetical protein A2Y34_11235<br>[Spirochaetes bacterium<br>GWC1_27_15].                      | GCA_001829235.1 |
| OHD42853.1 | MORC→?→?→?→  <?<-PSE<-?  LRR-repeats+AP-GTPase+COR→  <-?<-?<-?  ?→?→?→?→ REC→  <-LRR-repeats+AP-GTPase+COR+DrHyd | LRR-repeats+AP-GTPase+COR                   | 1020 | A2086_15855 | Spirochaetes        | Spirochaetes bacterium<br>GWD1_27_9                          | hypothetical protein A2086_15855<br>[Spirochaetes bacterium<br>GWD1_27_9].                       | GCA_001830585.1 |
| OIO84219.1 | <-XIS-HTH  HTH+HTH→  <-WLM  ?→ NACHT+68TM-wHTH→ REase→?→ LRR-repeats+AP-GTPase+COR*→                             | LRR-repeats+AP-GTPase+COR                   | 1004 | AUK01_09955 | Chloroflexi         | Anaerolineae bacterium<br>CG2_30_57_67                       | hypothetical protein AUK01_09955,<br>partial [Anaerolineae bacterium<br>CG2_30_57_67].           | GCA_001872455.1 |
| OJJ15121.1 | LRR-repeats+AP-GTPase+COR*→                                                                                      | LRR-repeats+AP-GTPase+COR                   | 1037 | BKI52_39320 | Bacteroidetes       | marine bacterium AO1-C                                       | hypothetical protein BKI52_39320<br>[marine bacterium AO1-C].                                    | GCA_001890965.1 |
| OJJ19161.1 | LRR-repeats+AP-GTPase+COR*→                                                                                      | LRR-repeats+AP-GTPase+COR                   | 851  | BKI52_20325 | Bacteroidetes       | marine bacterium AO1-C                                       | hypothetical protein BKI52_20325<br>[marine bacterium AO1-C].                                    | GCA_001890965.1 |
| OJJ19619.1 | LRR-repeats+AP-GTPase+COR*→  <?<-?<-?<-?<-TetR-HTH                                                               | LRR-repeats+AP-GTPase+COR                   | 723  | BKI52_22705 | Bacteroidetes       | marine bacterium AO1-C                                       | hypothetical protein BKI52_22705,<br>partial [marine bacterium AO1-C].                           | GCA_001890965.1 |
| OJJ19690.1 | <-Four-helical-protein<-?<-?<-?<-?  LRR-repeats+AP-GTPase+COR*→                                                  | LRR-repeats+AP-GTPase+COR                   | 1463 | BKI52_19350 | Bacteroidetes       | marine bacterium AO1-C                                       | hypothetical protein BKI52_19350<br>[marine bacterium AO1-C].                                    | GCA_001890965.1 |
| OJJ20943.1 | Cluster2042_2clades→  <?<-?  ?→?→?→  <-?  LRR-repeats+AP-GTPase+COR+EAD11*→  <-PAS+HISKIN                        | LRR-repeats+AP-<br>GTPase+COR+EAD11         | 871  | BKI52_10210 | Bacteroidetes       | marine bacterium AO1-C                                       | hypothetical protein BKI52_10210<br>[marine bacterium AO1-C].                                    | GCA_001890965.1 |
| OJJ21241.1 | LRR-repeats+AP-GTPase+COR*→?→  <-?<-cNMPBD                                                                       | LRR-repeats+AP-GTPase+COR                   | 910  | BKI52_11795 | Bacteroidetes       | marine bacterium AO1-C                                       | hypothetical protein BKI52_11795<br>[marine bacterium AO1-C].                                    | GCA_001890965.1 |
| OJJ22385.1 | <-SIGMA-HTH  ?→?→?→?→?→  <-?  LRR-repeats+AP-GTPase+COR*→?→?→?→  <-?<-?<-?<-SIGMA-HTH                            | LRR-repeats+AP-GTPase+COR                   | 1192 | BKI52_06800 | Bacteroidetes       | marine bacterium AO1-C                                       | hypothetical protein BKI52_06800<br>[marine bacterium AO1-C].                                    | GCA_001890965.1 |
| OJJ23263.1 | D5ATPase→?→ LRR-repeats+AP-GTPase+COR*→                                                                          | LRR-repeats+AP-GTPase+COR                   | 1296 | BKI52_02595 | Bacteroidetes       | marine bacterium AO1-C                                       | hypothetical protein BKI52_02595<br>[marine bacterium AO1-C].                                    | GCA_001890965.1 |



| acc        | operon                                                                                                   | architecture                      | len  | gen.name       | taxend              | species                                    | define                                                                            | gca             |
|------------|----------------------------------------------------------------------------------------------------------|-----------------------------------|------|----------------|---------------------|--------------------------------------------|-----------------------------------------------------------------------------------|-----------------|
| OJJ23599.1 | SF2-DUF3427A→?→ TRD+TRD→?→?→ LRR-repeats+AP-GTPase+COR*→?→  <?<-LRR-repeats<-?  cNMPBD→                  | LRR-repeats+AP-GTPase+COR         | 1001 | BKI52_04350    | Bacteroidetes       | marine bacterium AO1-C                     | hypothetical protein BKI52_04350 [marine bacterium AO1-C].                        | GCA_001890965.1 |
| OKH11101.1 | LRR-repeats+AP-GTPase+COR+TM+TM*→                                                                        | LRR-repeats+AP-GTPase+COR+TM+TM   | 944  | NIES208_17750  | Cyanobacteria       | Limnothrix rosea IAM M-220                 | hypothetical protein NIES208_17750 [Limnothrix rosea IAM M-220].                  | GCA_001904615.1 |
| OKH34496.1 | LRR-repeats+AP-GTPase+COR+TM+TM*→  <-CASPAGE+TPR                                                         | LRR-repeats+AP-GTPase+COR+TM+TM   | 902  | FACHB389_15645 | Cyanobacteria       | Nostoc calcicola FACHB-389                 | GTPase [Nostoc calcicola FACHB-389].                                              | GCA_001904715.1 |
| OLE55789.1 | <-RFC-AAA<-?<-Trichomonas-DAM<-?<-?<-ISOCOT  LRR-repeats+AP-GTPase+COR+TIR*→                             | LRR-repeats+AP-GTPase+COR+TIR     | 862  | AUG51_01855    | Acidobacteria       | Acidobacteria bacterium 13_1_20CM_3_53_8   | serine/threonine protein kinase [Acidobacteria bacterium 13_1_20CM_3_53_8].       | GCA_001920415.1 |
| OLF12412.1 | LRR-repeats+AP-GTPase+COR*→?→?→?→  <-?<-ABC-ATPase+ABC-ATPase                                            | LRR-repeats+AP-GTPase+COR         | 927  | BLA60_09370    | Actinobacteria      | Actinophytocola xinjiangensis              | hypothetical protein BLA60_09370 [Actinophytocola xinjiangensis].                 | GCA_001921215.1 |
| OQX01793.1 | LRR-repeats+AP-GTPase+COR+TIR*→  <-?<-PSE<-?<-PSE<-PSE<-?<-?<-?  PSE→  <-?  ABhydrolase→                 | LRR-repeats+AP-GTPase+COR+TIR     | 928  | BWK73_44950    | Gammaproteobacteria | Thiothrix lacustris                        | GTP-binding protein [Thiothrix lacustris].                                        | GCA_002083875.1 |
| OQX02054.1 | nSTAND3+REase-DUF4143→ LRR-repeats+AP-GTPase+COR*→ TIR→?→  <-Thioredoxin                                 | LRR-repeats+AP-GTPase+COR         | 784  | BWK73_43990    | Gammaproteobacteria | Thiothrix lacustris                        | hypothetical protein BWK73_43990 [Thiothrix lacustris].                           | GCA_002083875.1 |
| OQX07365.1 | LRR-repeats+AP-GTPase+COR+CASPASE*→                                                                      | LRR-repeats+AP-GTPase+COR+CASPASE | 879  | BWK80_49550    | Deltaproteobacteria | Desulfobacteraceae bacterium IS3           | hypothetical protein BWK80_49550 [Desulfobacteraceae bacterium IS3].              | GCA_002083955.1 |
| OQX24659.1 | LRR-repeats+AP-GTPase+COR→ Cluster2372_2clades→?→ LRR-repeats+AP-GTPase+COR→ LRR-repeats+AP-GTPase+COR*→ | LRR-repeats+AP-GTPase+COR         | 881  | BWK80_19660    | Deltaproteobacteria | Desulfobacteraceae bacterium IS3           | hypothetical protein BWK80_19660 [Desulfobacteraceae bacterium IS3].              | GCA_002083955.1 |
| OQX24662.1 | LRR-repeats+AP-GTPase+COR+TM*→                                                                           | LRR-repeats+AP-GTPase+COR+TM      | 925  | BWK80_19675    | Deltaproteobacteria | Desulfobacteraceae bacterium IS3           | hypothetical protein BWK80_19675 [Desulfobacteraceae bacterium IS3].              | GCA_002083955.1 |
| OQX24663.1 | LRR-repeats+AP-GTPase+COR*→                                                                              | LRR-repeats+AP-GTPase+COR         | 870  | BWK80_19680    | Deltaproteobacteria | Desulfobacteraceae bacterium IS3           | hypothetical protein BWK80_19680 [Desulfobacteraceae bacterium IS3].              | GCA_002083955.1 |
| OQX25920.1 | LRR-repeats+AP-GTPase+COR*→?→?→?→?→ ABC-ATPase→ SIG+TM+TM+TM+TM+TM+TM→  <-Cluster968_2clades             | LRR-repeats+AP-GTPase+COR         | 802  | BWK80_13160    | Deltaproteobacteria | Desulfobacteraceae bacterium IS3           | hypothetical protein BWK80_13160 [Desulfobacteraceae bacterium IS3].              | GCA_002083955.1 |
| OQY27201.1 | LRR-repeats+AP-GTPase+COR*→?→  <-?<-?<-?  TM+TM+TM+TM+TM+TM→                                             | LRR-repeats+AP-GTPase+COR         | 700  | B6244_11350    | FCB group           | Candidatus Cloacimonetes bacterium 4572_55 | hypothetical protein B6244_11350 [Candidatus Cloacimonetes bacterium 4572_55].    | GCA_002084765.1 |
| OQY46926.1 | LRR-repeats+AP-GTPase+COR*→  <-PSE  ?→ LRR-repeats→                                                      | LRR-repeats+AP-GTPase+COR         | 887  | B6247_27150    | Gammaproteobacteria | Beggiatoa sp. 4572_84                      | GTPase [Beggiatoa sp. 4572_84].                                                   | GCA_002085445.1 |
| OQY52602.1 | SIG+TM+TM+TM+TM+TM+TM+TM→?→?→?→?→ LRR-repeats+AP-GTPase+COR→?→?→?→ LRR-repeats+AP-GTPase+COR→            | LRR-repeats+AP-GTPase+COR         | 429  | B6245_23480    | Deltaproteobacteria | Desulfobacteraceae bacterium 4572_88       | hypothetical protein B6245_23480, partial [Desulfobacteraceae bacterium 4572_88]. | GCA_002085455.1 |
| OQY52606.1 | LRR-repeats+AP-GTPase+COR*→                                                                              | LRR-repeats+AP-GTPase+COR         | 933  | B6245_23500    | Deltaproteobacteria | Desulfobacteraceae bacterium 4572_88       | hypothetical protein B6245_23500 [Desulfobacteraceae bacterium 4572_88].          | GCA_002085455.1 |
| OQY56003.1 | CBS→ PSE→  <-?  ?→?→ LRR-repeats→?→ PSE→ LRR-repeats→ LRR-repeats+AP-GTPase+COR*→                        | LRR-repeats+AP-GTPase+COR         | 907  | B6247_05655    | Gammaproteobacteria | Beggiatoa sp. 4572_84                      | GTPase [Beggiatoa sp. 4572_84].                                                   | GCA_002085445.1 |
| OQY58390.1 | LRR-repeats+AP-GTPase+COR*→ SIG+DADALIGASE-ATPgrasp→                                                     | LRR-repeats+AP-GTPase+COR         | 791  | B6245_12095    | Deltaproteobacteria | Desulfobacteraceae bacterium 4572_88       | hypothetical protein B6245_12095 [Desulfobacteraceae bacterium 4572_88].          | GCA_002085455.1 |
| OSM01684.1 | SIGMA-HTH→?→  <-?<-?<-?<-?<-?  LRR-repeats+AP-GTPase+COR*→                                               | LRR-repeats+AP-GTPase+COR         | 876  | MAIT1_01702    | Alphaproteobacteria | Magnetofaba australis IT-1                 | putative small GTP-binding protein [Magnetofaba australis IT-1].                  | GCA_002109495.1 |
| OUC12119.1 | LRR-repeats+AP-GTPase+COR+DrHyd*→?→?→ FGS→                                                               | LRR-repeats+AP-GTPase+COR+DrHyd   | 810  | B0A82_24265    | Cyanobacteria       | Alkalinema sp. CACIAM 70d                  | hypothetical protein B0A82_24265, partial [Alkalinema sp. CACIAM 70d].            | GCA_002148405.1 |
| OUC12470.1 | <-HISKIN<-?<-?<-PRTase<-?  ?→ LRR-repeats+AP-GTPase+COR*→                                                | LRR-repeats+AP-GTPase+COR         | 820  | B0A82_22225    | Cyanobacteria       | Alkalinema sp. CACIAM 70d                  | hypothetical protein B0A82_22225 [Alkalinema sp. CACIAM 70d].                     | GCA_002148405.1 |
| OUC13078.1 | <-TIR+TM+CHASE2+CHASE2+TM+TM+TM<-SIG+RnaseT2<-?  ?→?→ LRR-repeats+AP-GTPase+COR*→                        | LRR-repeats+AP-GTPase+COR         | 919  | B0A82_18905    | Cyanobacteria       | Alkalinema sp. CACIAM 70d                  | GTPase [Alkalinema sp. CACIAM 70d].                                               | GCA_002148405.1 |
| OUC15727.1 | LRR-repeats+AP-GTPase+COR+DUF4404*→?→  <-Cluster2098_2clades                                             | LRR-repeats+AP-GTPase+COR+DUF4404 | 969  | B0A82_05270    | Cyanobacteria       | Alkalinema sp. CACIAM 70d                  | hypothetical protein B0A82_05270, partial [Alkalinema sp. CACIAM 70d].            | GCA_002148405.1 |

| acc        | operon                                                                                                                                                                                       | architecture                               | len  | gen.name    | taxend              | species                                            | define                                                                                          | gca             |
|------------|----------------------------------------------------------------------------------------------------------------------------------------------------------------------------------------------|--------------------------------------------|------|-------------|---------------------|----------------------------------------------------|-------------------------------------------------------------------------------------------------|-----------------|
| OWK46761.1 | <-Aminotran_1_2  LRR-repeats+AP-GTPase+COR+TIR*->  <-?<-?<-?<-DSBH+AraC-HTH+AraC-HTH  ?->?-> SIG+TM+TM+TM->                                                                                  | LRR-repeats+AP-GTPase+COR+TIR              | 1310 | FRUB_00460  | Planctomycetes      | Fimbrioglobus ruber                                | HtrA protease/chaperone protein [Fimbrioglobus ruber].                                          | GCA_002197845.1 |
| OWK47329.1 | <-ReIE-ParE<-?  ?-> LRR-repeats->  <-?  LRR-repeats+AP-GTPase+COR*->                                                                                                                         | LRR-repeats+AP-GTPase+COR                  | 967  | FRUB_01028  | Planctomycetes      | Fimbrioglobus ruber                                | putative internalin [Fimbrioglobus ruber].                                                      | GCA_002197845.1 |
| OYQ36252.1 | <-SIG+TM+TM+TM+HISKIN<-?<-?<-?  ?-> LRR-repeats+AP-GTPase+COR+TIR*-> ParA-Soj-PloopNTPase-> ParB->                                                                                           | LRR-repeats+AP-GTPase+COR+TIR              | 890  | CHU95_05565 | Alphaproteobacteria | Niveispirillum lacus                               | hypothetical protein CHU95_05565 [Niveispirillum lacus].                                        | GCA_002251795.1 |
| OYU93091.1 | LRR-repeats+AP-GTPase+COR+TM+TM*->                                                                                                                                                           | LRR-repeats+AP-GTPase+COR+TM+TM            | 1040 | CFE21_21825 | Bacteroidetes       | Bacteroidetes bacterium B1(2017)                   | hypothetical protein CFE21_21825, partial [Bacteroidetes bacterium B1(2017)].                   | GCA_002256395.1 |
| OYW76150.1 | LRR-repeats+AP-GTPase+COR+TIR*->?->  <-?<-WCAK  ?-> REC-> REC->                                                                                                                              | LRR-repeats+AP-GTPase+COR+TIR              | 996  | B7Z37_09950 | Verrucomicrobia     | Verrucomicrobia bacterium 12-59-8                  | hypothetical protein B7Z37_09950 [Verrucomicrobia bacterium 12-59-8].                           | GCA_002279765.1 |
| OYW77555.1 | SIG+ABhydrolase->?-> LRR-repeats+AP-GTPase+COR+TIR*->                                                                                                                                        | LRR-repeats+AP-GTPase+COR+TIR              | 939  | B7Z37_03775 | Verrucomicrobia     | Verrucomicrobia bacterium 12-59-8                  | hypothetical protein B7Z37_03775 [Verrucomicrobia bacterium 12-59-8].                           | GCA_002279765.1 |
| OYW78304.1 | FGS-> LRR-repeats+AP-GTPase+COR*->                                                                                                                                                           | LRR-repeats+AP-GTPase+COR                  | 1063 | B7Z37_00425 | Verrucomicrobia     | Verrucomicrobia bacterium 12-59-8                  | hypothetical protein B7Z37_00425 [Verrucomicrobia bacterium 12-59-8].                           | GCA_002279765.1 |
| PCI29610.1 | LRR-repeats+RNA-Helicase+AP-GTPase+COR+TIR*->?->  <-AraC-HTH  ?->?->  <-Cluster1048_2clades<-POLYSACPOLYMERASE                                                                               | LRR-repeats+RNA-Helicase+AP-GTPase+COR+TIR | 1264 | COB67_03805 | Deltaproteobacteria | SAR324 cluster bacterium                           | hypothetical protein COB67_03805 [SAR324 cluster bacterium].                                    | GCA_002401295.1 |
| PCK09719.1 | LRR-repeats+AP-GTPase+COR*->                                                                                                                                                                 | LRR-repeats+AP-GTPase+COR                  | 908  | COA42_02805 | Gammaproteobacteria | Alteromonadaceae bacterium                         | hypothetical protein COA42_02805 [Alteromonadaceae bacterium].                                  | GCA_002746115.1 |
| PHM06637.1 | LRR-repeats+AP-GTPase+COR+TM+TM*->                                                                                                                                                           | LRR-repeats+AP-GTPase+COR+TM+TM            | 817  | CK516_32280 | Cyanobacteria       | Nostoc sp. 'Peltigera malacea cyanobiont' DB3992   | GTPase [Nostoc sp. 'Peltigera malacea cyanobiont' DB3992].                                      | GCA_002631755.1 |
| PHS08569.1 | LRR-repeats+AP-GTPase+COR*-> SIG+TM+TM+TM+TM+TM+TM+TM+TM+TM+TM+TM->                                                                                                                          | LRR-repeats+AP-GTPase+COR                  | 924  | COA88_06290 | Bacteroidetes       | Kordia sp.                                         | GTP-binding protein [Kordia sp.].                                                               | GCA_002733415.1 |
| PID45108.1 | Cluster1540_2clades->?->?->?->?-> tRNA-> LRR-repeats+AP-GTPase+COR*->  <-?<-?  Cluster2057_2clades->                                                                                         | LRR-repeats+AP-GTPase+COR                  | 1016 | CSB47_10150 | Proteobacteria      | Proteobacteria bacterium                           | hypothetical protein CSB47_10150 [Proteobacteria bacterium].                                    | GCA_002747455.1 |
| PID49971.1 | SIG+TM+TM+TM+TM+TM+TM+TM+TM+TM+TM+TM->                                                                                                                                                       | LRR-repeats+AP-GTPase+COR+TIR              | 916  | CR991_03995 | Proteobacteria      | Proteobacteria bacterium                           | hypothetical protein CR991_03995 [Proteobacteria bacterium].                                    | GCA_002747435.1 |
| PID58617.1 | LRR-repeats+AP-GTPase+COR+TIR*->?->  <-?<-?<-?<-?<-Cluster1063_3clades<-Cluster1067_3clades<-Cluster1581_2clades<-?  NUDIX-> LRR-repeats+AP-GTPase+COR*->                                    | LRR-repeats+AP-GTPase+COR                  | 1061 | CSB45_03475 | Bacteria            | candidate division KSB3 bacterium                  | GTPase [candidate division KSB3 bacterium].                                                     | GCA_002747525.1 |
| PIE10915.1 | LRR-repeats+AP-GTPase+COR*->  <-?<-tRNA  ?->?-> Cluster1995_2clades->                                                                                                                        | LRR-repeats+AP-GTPase+COR                  | 994  | CSA72_05310 | Alphaproteobacteria | Rhodobacterales bacterium                          | hypothetical protein CSA72_05310 [Rhodobacterales bacterium].                                   | GCA_002748265.1 |
| PJB68563.1 | <-XIS-HTH  HTH+HTH->  <-WLM  ?-> NACHT+68TM-wHTH-> REase->?-> LRR-repeats+AP-GTPase+COR*->                                                                                                   | LRR-repeats+AP-GTPase+COR                  | 947  | CO094_00645 | Chloroflexi         | Anaerolineae bacterium CG_4_9_14_3_um_filter_57_17 | hypothetical protein CO094_00645, partial [Anaerolineae bacterium CG_4_9_14_3_um_filter_57_17]. | GCA_002789715.1 |
| PJF39486.1 | LRR-repeats+AP-GTPase+COR+TM+TM*->                                                                                                                                                           | LRR-repeats+AP-GTPase+COR+TM+TM            | 751  | CUN54_08620 | Chloroflexi         | Candidatus Thermofonsia Clade 2 bacterium          | GTP-binding protein [Candidatus Thermofonsia Clade 2 bacterium].                                | GCA_002794595.1 |
| PKB73283.1 | LRR-repeats+AP-GTPase+COR*->  <-?<-?<-PSE<-SIG+ABhydrolase<-?<-ParA-Soj-PloopNTPase                                                                                                          | LRR-repeats+AP-GTPase+COR                  | 593  | BZY75_02725 | Chloroflexi         | SAR202 cluster bacterium Io17-Chloro-G7            | hypothetical protein BZY75_02725 [SAR202 cluster bacterium Io17-Chloro-G7].                     | GCA_002817055.1 |
| PKD18393.1 | LRR-repeats+AP-GTPase+COR*->                                                                                                                                                                 | LRR-repeats+AP-GTPase+COR                  | 845  | APR41_04380 | Bacteroidetes       | Salegentibacter salinarum                          | hypothetical protein APR41_04380 [Salegentibacter salinarum].                                   | GCA_002833365.1 |
| PKN92928.1 | UvsW-A18-> LRR-repeats+AP-GTPase+COR-> NACHT+68TM-wHTH-> LRR-repeats+AP-GTPase+COR-> LRR-repeats+AP-GTPase+COR+DUF4404->?->?-> Cluster1559_2clades->?->?->  <-?  LRR-repeats+AP-GTPase+COR-> | LRR-repeats+AP-GTPase+COR                  | 769  | CVU44_12925 | Chloroflexi         | Chloroflexi bacterium HGW-Chloroflexi-6            | GTP-binding protein [Chloroflexi bacterium HGW-Chloroflexi-6].                                  | GCA_002840685.1 |
| PKN92930.1 | LRR-repeats+AP-GTPase+COR*->                                                                                                                                                                 | LRR-repeats+AP-GTPase+COR                  | 1044 | CVU44_12935 | Chloroflexi         | Chloroflexi bacterium HGW-Chloroflexi-6            | hypothetical protein CVU44_12935 [Chloroflexi bacterium HGW-Chloroflexi-6].                     | GCA_002840685.1 |
| PKN92931.1 | LRR-repeats+AP-GTPase+COR+DUF4404*->                                                                                                                                                         | LRR-repeats+AP-GTPase+COR+DUF4404          | 812  | CVU44_12940 | Chloroflexi         | Chloroflexi bacterium HGW-Chloroflexi-6            | hypothetical protein CVU44_12940 [Chloroflexi bacterium HGW-Chloroflexi-6].                     | GCA_002840685.1 |
| PKN92938.1 | LRR-repeats+AP-GTPase+COR*->                                                                                                                                                                 | LRR-repeats+AP-GTPase+COR                  | 673  | CVU44_12975 | Chloroflexi         | Chloroflexi bacterium HGW-Chloroflexi-6            | GTP-binding protein [Chloroflexi bacterium HGW-Chloroflexi-6].                                  | GCA_002840685.1 |

| acc        | operon                                                                                                                                                                                 | architecture                                 | len  | gen.name       | taxend                | species                                         | define                                                                                  | gca             |
|------------|----------------------------------------------------------------------------------------------------------------------------------------------------------------------------------------|----------------------------------------------|------|----------------|-----------------------|-------------------------------------------------|-----------------------------------------------------------------------------------------|-----------------|
| PKP35889.1 | REC→ HISKIN→?→ LRR-repeats+AP-GTPase+COR*→                                                                                                                                             | LRR-repeats+AP-GTPase+COR                    | 654  | CVU00_00150    | Bacteroidetes         | Bacteroidetes bacterium<br>HGW-Bacteroidetes-17 | hypothetical protein CVU00_00150<br>[Bacteroidetes bacterium<br>HGW-Bacteroidetes-17].  | GCA_002840985.1 |
| PLX96646.1 | LRR-repeats+AP-GTPase+COR+DrHyd*→  <-?  ?→?→?→  <-?<-?<-SIG+PDZ                                                                                                                        | LRR-repeats+AP-GTPase+COR+DrHyd              | 1001 | C0622_14350    | Deltaproteobacteria   | Desulfuromonas sp.                              | hypothetical protein C0622_14350<br>[Desulfuromonas sp.].                               | GCA_002869665.1 |
| PLY10861.1 | LRR-repeats+AP-GTPase+COR*→  <-?<-tRNA<-?<-?  Cluster1398_2clades→ ABC-ATPase→                                                                                                         | LRR-repeats+AP-GTPase+COR                    | 1225 | C0626_04310    | Epsilonproteobacteria | Arcobacter sp.                                  | hypothetical protein C0626_04310<br>[Arcobacter sp.].                                   | GCA_002869535.1 |
| POZ53622.1 | REC→  <-?<-?<-?<-?  ?→ LRR-repeats+AP-GTPase+COR+DpnII-MboI-NTD+TIR*→                                                                                                                  | LRR-repeats+AP-GTPase+COR+DpnII-MboI-NTD+TIR | 1108 | AADEFJLK_00657 | Gammaproteobacteria   | Methylovulum<br>psychrotolerans                 | GTP-binding protein [Methylovulum<br>psychrotolerans].                                  | GCA_002923755.1 |
| PPT07796.1 | LRR-repeats+AP-GTPase+COR+BactIG*→                                                                                                                                                     | LRR-repeats+AP-GTPase+COR+BactIG             | 726  | CKA32_002768   | Cyanobacteria         | Geitlerinema sp. FC II                          | Leucine-rich repeat containing<br>protein [Geitlerinema sp. FC II].                     | GCA_002286845.1 |
| PRQ08092.1 | LRR-repeats+AP-GTPase+COR+PNPase*→                                                                                                                                                     | LRR-repeats+AP-GTPase+COR+PNPase             | 933  | mtaN           | Deltaproteobacteria   | Enhygromyxa salina                              | 5'-methylthioadenosine/S-<br>adenosylhomocysteine nucleosidase<br>[Enhygromyxa salina]. | GCA_002994635.1 |
| PSB34361.1 | <-REC  REC→  <-?<-?<-?<-TIR+TM+CHASE2+CHASE2+TM+TM+TM  PSE→ LRR-repeats+AP-GTPase+COR+TIR*→                                                                                            | LRR-repeats+AP-GTPase+COR+TIR                | 1113 | C7B82_02520    | Cyanobacteria         | Stenomitos frigidus ULC18                       | serine/threonine protein kinase<br>[Stenomitos frigidus ULC18].                         | GCA_003003795.1 |
| PSM30901.1 | LRR-repeats+AP-GTPase+COR*→                                                                                                                                                            | LRR-repeats+AP-GTPase+COR                    | 431  | BVG81_008130   | Deltaproteobacteria   | Haliangium sp. UPWRP_2                          | GTPase, partial [Haliangium sp.<br>UPWRP_2].                                            | GCA_002212765.2 |
| PTS96034.1 | LRR-repeats+AP-GTPase*→                                                                                                                                                                | LRR-repeats+AP-GTPase                        | 357  | DBR27_16615    | Bacteroidetes         | Flavobacterium sp.<br>HMWF030                   | hypothetical protein DBR27_16615,<br>partial [Flavobacterium sp.<br>HMWF030].           | GCA_003061345.1 |
| PWQ95663.1 | LRR-repeats+AP-GTPase+COR+TIR*→                                                                                                                                                        | LRR-repeats+AP-GTPase+COR+TIR                | 801  | DKT75_11555    | Gammaproteobacteria   | Leucothrix arctica                              | GTP-binding protein, partial<br>[Leucothrix arctica].                                   | GCA_003172895.1 |
| PXF61747.1 | LRR-repeats+AP-GTPase+COR*→                                                                                                                                                            | LRR-repeats+AP-GTPase+COR                    | 978  | C4B59_02515    | Euryarchaeota         | ANME-2 cluster archaeon                         | hypothetical protein C4B59_02515<br>[ANME-2 cluster archaeon].                          | GCA_003194445.1 |
| PXX81924.1 | <-ACET<-?<-?<-?  ?→ HSP70→ DNAJ→ LRR-repeats+AP-GTPase+COR+TIR*→                                                                                                                       | LRR-repeats+AP-GTPase+COR+TIR                | 947  | DFR34_101153   | Betaproteobacteria    | Rivicola pingtungensis                          | internalin A [Rivicola pingtungensis].                                                  | GCA_003201855.1 |
| PYI92098.1 | LRR-repeats+AP-GTPase+COR+TIR*→                                                                                                                                                        | LRR-repeats+AP-GTPase+COR+TIR                | 882  | DME97_11675    | Verrucomicrobia       | Verrucomicrobia bacterium                       | hypothetical protein DME97_11675<br>[Verrucomicrobia bacterium].                        | GCA_003218375.1 |
| PYQ65591.1 | LRR-repeats+AP-GTPase+COR+TIR*→  <-START                                                                                                                                               | LRR-repeats+AP-GTPase+COR+TIR                | 985  | DMF53_05195    | Acidobacteria         | Acidobacteria bacterium                         | hypothetical protein DMF53_05195<br>[Acidobacteria bacterium].                          | GCA_003223675.1 |
| PZN70482.1 | LRR-repeats+AP-GTPase+COR*→ TIR→                                                                                                                                                       | LRR-repeats+AP-GTPase+COR                    | 479  | DM484_28490    | Gammaproteobacteria   | Candidatus<br>Methyloumidiphilus<br>alinensis   | hypothetical protein DM484_28490<br>[Candidatus Methyloumidiphilus<br>alinensis].       | GCA_003242955.1 |
| PZN77149.1 | LRR-repeats+AP-GTPase+COR+TIR*→                                                                                                                                                        | LRR-repeats+AP-GTPase+COR+TIR                | 1032 | DM484_15240    | Gammaproteobacteria   | Candidatus<br>Methyloumidiphilus<br>alinensis   | hypothetical protein DM484_15240<br>[Candidatus Methyloumidiphilus<br>alinensis].       | GCA_003242955.1 |
| PZN84233.1 | LRR-repeats+AP-GTPase+COR+TIR*→                                                                                                                                                        | LRR-repeats+AP-GTPase+COR+TIR                | 820  | DM484_03135    | Gammaproteobacteria   | Candidatus<br>Methyloumidiphilus<br>alinensis   | GTP-binding protein [Candidatus<br>Methyloumidiphilus alinensis].                       | GCA_003242955.1 |
| PZO19892.1 | <-SIG+TM+TM+TM  ?→?→?→ LRR-repeats+AP-GTPase+COR*→                                                                                                                                     | LRR-repeats+AP-GTPase+COR                    | 715  | DCF25_07770    | Cyanobacteria         | Leptolyngbya foveolarum                         | hypothetical protein DCF25_07770,<br>partial [Leptolyngbya foveolarum].                 | GCA_003242035.1 |
| PZO41190.1 | LRR-repeats+AP-GTPase+COR*→  <-PIN<-PSE  HISKIN→ REC→                                                                                                                                  | LRR-repeats+AP-GTPase+COR                    | 872  | DCF19_10445    | Cyanobacteria         | Pseudanabaena frigida                           | GTPase [Pseudanabaena frigida].                                                         | GCA_003242085.1 |
| PZO43272.1 | Cluster53_2clades→ Cluster53_2clades→?→ LRR-repeats+AP-GTPase+COR+CASPASE*→  <-?<-?  ?→?→<br>Cluster944_3clades→  <-tRNA<-NUDX  REC→                                                   | LRR-repeats+AP-GTPase+COR+CASPASE            | 1158 | DCF19_04785    | Cyanobacteria         | Pseudanabaena frigida                           | GTPase [Pseudanabaena frigida].                                                         | GCA_003242085.1 |
| PZO45083.1 | PAS+HISKIN→ REC→ HISKIN→  <-?<-?<-?  LRR-repeats+AP-GTPase+COR*→  <-?  ?→?→?→  <-ABC-ATPase                                                                                            | LRR-repeats+AP-GTPase+COR                    | 1026 | DCF19_00905    | Cyanobacteria         | Pseudanabaena frigida                           | hypothetical protein DCF19_00905<br>[Pseudanabaena frigida].                            | GCA_003242085.1 |
| PZS26024.1 | LRR-repeats+AP-GTPase*→                                                                                                                                                                | LRR-repeats+AP-GTPase                        | 304  | DLM61_19115    | Actinobacteria        | Pseudonocardiales<br>bacterium                  | hypothetical protein DLM61_19115<br>[Pseudonocardiales bacterium].                      | GCA_003244245.1 |
| PZU97949.1 | <-Cluster53_2clades  ?→ Cluster53_2clades→ Cluster54_3clades→?→ RelE-ParE→<br>LRR-repeats+AP-GTPase+COR+DUF4404*→?→?→  <-Cluster1583_2clades<-Cluster1881_2clades<-Cluster1340_2clades | LRR-repeats+AP-GTPase+COR+DUF4404            | 1125 | DCE90_05495    | Cyanobacteria         | Pseudanabaena sp.                               | Ras family protein [Pseudanabaena<br>sp.].                                              | GCA_003249015.1 |

| acc        | operon                                                                                                                                                           | architecture                      | len  | gen.name    | taxend              | species                                  | define                                                                    | gca             |
|------------|------------------------------------------------------------------------------------------------------------------------------------------------------------------|-----------------------------------|------|-------------|---------------------|------------------------------------------|---------------------------------------------------------------------------|-----------------|
| PZV15467.1 | Cluster53_2clades→?→ LRR-repeats+AP-GTPase+COR+TM+TM*→?→  <?<?-ABC-ATPase<?  PSE→?→ ABC_membrane+ABC_tran→                                                       | LRR-repeats+AP-GTPase+COR+TM+TM   | 966  | DCF20_10315 | Cyanobacteria       | Pseudanabaena sp.                        | GTP-binding protein [Pseudanabaena sp.].                                  | GCA_003249035.1 |
| PZV19789.1 | LRR-repeats+AP-GTPase+COR*→?→ Cluster2508_2clades→                                                                                                               | LRR-repeats+AP-GTPase+COR         | 779  | DCF21_06795 | Cyanobacteria       | Leptolyngbya sp.                         | GTP-binding protein [Leptolyngbya sp.].                                   | GCA_003249155.1 |
| PZV24423.1 | LRR-repeats+AP-GTPase+COR*→                                                                                                                                      | LRR-repeats+AP-GTPase+COR         | 522  | DCF12_17370 | Cyanobacteria       | Snowella sp.                             | hypothetical protein DCF12_17370 [Snowella sp.].                          | GCA_003249095.1 |
| PZV25744.1 | <-REC  ?→?→  <?<?  ?→ LRR-repeats+AP-GTPase+COR*→  <-DAGKIN  ?→ Cluster5_5clades→                                                                                | LRR-repeats+AP-GTPase+COR         | 860  | DCF12_13370 | Cyanobacteria       | Snowella sp.                             | GTP-binding protein [Snowella sp.].                                       | GCA_003249095.1 |
| PZV26136.1 | <-Cluster1004_3clades  Cluster1843_2clades→  <?  Cluster5_5clades→  <-Cluster1306_2clades<-?<?  LRR-repeats+AP-GTPase+COR*→                                      | LRR-repeats+AP-GTPase+COR         | 885  | DCF12_11170 | Cyanobacteria       | Snowella sp.                             | GTPase [Snowella sp.].                                                    | GCA_003249095.1 |
| PZW23552.1 | LRR-repeats→ LRR-repeats+AP-GTPase+COR*→                                                                                                                         | LRR-repeats+AP-GTPase+COR         | 813  | EI42_04935  | Chloroflexi         | Thermosporothrix hazakensis              | GTPase SAR1 family protein, partial [Thermosporothrix hazakensis].        | GCA_003253565.1 |
| QDV38731.1 | RelE-ParE→ WCAK→?→  <-Cluster2079_2clades  ?→?→?→ LRR-repeats+AP-GTPase+COR+DUF4404*→                                                                            | LRR-repeats+AP-GTPase+COR+DUF4404 | 887  | slrP        | Planctomycetes      | Tautonia plasticadhaerens                | E3 ubiquitin-protein ligase SlrP [Tautonia plasticadhaerens].             | GCA_007752535.1 |
| QEN02468.1 | HTH→?→?→ LRR-repeats+AP-GTPase+COR+TIR*→  <?<-ABC_membrane+ABC_tran  Cyanophycinsyn-ATPgrasp→ Cyanophycinsyn-ATPgrasp→                                           | LRR-repeats+AP-GTPase+COR+TIR     | 1307 | EWH46_18040 | Betaproteobacteria  | Sphaerotilus natans subsp. sulfidivorans | TIR domain-containing protein [Sphaerotilus natans subsp. sulfidivorans]. | GCA_008329925.1 |
| QHA06431.1 | LRR-repeats+AP-GTPase+COR*→  <?  ?→  <?<-SIGMA-HTH<-?<-SIGMA-HTH                                                                                                 | LRR-repeats+AP-GTPase+COR         | 1022 | GQF42_26905 | Actinobacteria      | Streptomyces broussonetiae               | GTPase [Streptomyces broussonetiae].                                      | GCA_009796285.1 |
| QKQ77944.1 | LRR-repeats+AP-GTPase+COR*→?→  <?  ?→  <?  ?→ ClpABN-AAA+ClpABC-AAA→  <-PSE<-SIG+TPR+TPR+TPR+TPR+TPR+TPR                                                         | LRR-repeats+AP-GTPase+COR         | 894  | FBB35_26070 | Cyanobacteria       | Nostoc sp. TCL240-02                     | GTPase [Nostoc sp. TCL240-02].                                            | GCA_013343235.1 |
| QLE48778.1 | ABhydrolase→?→  <?  LRR-repeats+AP-GTPase+COR+TIR*→  <-PSE<-?  ?→  <?<-SIG+NUDIX<-?<-?<-Cluster5_5clades                                                         | LRR-repeats+AP-GTPase+COR+TIR     | 1021 | FD724_12065 | Cyanobacteria       | Nostoc sp. C057                          | TIR domain-containing protein [Nostoc sp. C057].                          | GCA_013393925.1 |
| QLH39529.1 | Cluster850_2clades→?→?→ PRTase→  <-ENDO3+NUDIX<-?  LRR-repeats+AP-GTPase+COR+TIR*→                                                                               | LRR-repeats+AP-GTPase+COR+TIR     | 816  | HWD60_12020 | Alphaproteobacteria | Defluviicoccus sp.                       | leucine-rich repeat domain-containing protein [Defluviicoccus sp.].       | GCA_013414705.1 |
| RAM50807.1 | LRR-repeats+AP-GTPase+COR+TIR*→?→  <-SIG+TM+TM+TM+TM+TM+TM+TM+TM+TM+TM+TM+TM+TM                                                                                  | LRR-repeats+AP-GTPase+COR+TIR     | 849  | C6Y22_14980 | Cyanobacteria       | Hapalosiphonaceae cyanobacterium JJU2    | hypothetical protein C6Y22_14980 [Hapalosiphonaceae cyanobacterium JJU2]. | GCA_003261315.1 |
| RCJ18019.1 | <-Pkinase+Pentapeptide<-?<-?  ?→  <-?<-TIR+EAD9<-?  LRR-repeats+AP-GTPase+COR+TIR*→                                                                              | LRR-repeats+AP-GTPase+COR+TIR     | 986  | A6770_33290 | Cyanobacteria       | Nostoc minutum NIES-26                   | GTPase [Nostoc minutum NIES-26].                                          | GCA_003326215.1 |
| RCJ19389.1 | LRR-repeats+AP-GTPase+COR*→  <-ClpABN-AAA+ClpABC-AAA<-?  METHYLASE→                                                                                              | LRR-repeats+AP-GTPase+COR         | 907  | A6S26_26810 | Cyanobacteria       | Nostoc sp. ATCC 43529                    | GTPase [Nostoc sp. ATCC 43529].                                           | GCA_003326205.1 |
| RCJ25694.1 | <-Pkinase+Pentapeptide<-?<-?  ?→  <-?  LRR-repeats+AP-GTPase+COR+TIR*→  <-?<-?<-?  ?→  <-NUDIX                                                                   | LRR-repeats+AP-GTPase+COR+TIR     | 962  | A6S26_15250 | Cyanobacteria       | Nostoc sp. ATCC 43529                    | GTPase [Nostoc sp. ATCC 43529].                                           | GCA_003326205.1 |
| RCJ30096.1 | CR-REase5→ LRR-repeats+AP-GTPase+COR*→?→  <-?  ?→  <-?  ?→ ClpABN-AAA+ClpABC-AAA→                                                                                | LRR-repeats+AP-GTPase+COR         | 894  | A6770_21505 | Cyanobacteria       | Nostoc minutum NIES-26                   | GTPase [Nostoc minutum NIES-26].                                          | GCA_003326215.1 |
| RCJ30909.1 | Cyanophycinsyn-ATPgrasp→  <-Cluster833_2clades<-?  ?→  <-?<-Four-helical-protein<-?  LRR-repeats+AP-GTPase+COR+TIR*→  <-ncRNA<-?<-?<-?  ?→  <-?  ?→ Thioredoxin→ | LRR-repeats+AP-GTPase+COR+TIR     | 928  | A6770_20515 | Cyanobacteria       | Nostoc minutum NIES-26                   | hypothetical protein A6770_20515 [Nostoc minutum NIES-26].                | GCA_003326215.1 |
| RCJ31306.1 | METHYLASE→  <-Arginase<-?<-?  LRR-repeats+AP-GTPase+COR+TIR*→?→?→  <-?<-?  ?→ Pentapeptide-repeats→                                                              | LRR-repeats+AP-GTPase+COR+TIR     | 1103 | A6770_20105 | Cyanobacteria       | Nostoc minutum NIES-26                   | GTPase [Nostoc minutum NIES-26].                                          | GCA_003326215.1 |
| RCJ40793.1 | LRR-repeats+AP-GTPase+COR+TIR*→                                                                                                                                  | LRR-repeats+AP-GTPase+COR+TIR     | 1079 | A6770_10335 | Cyanobacteria       | Nostoc minutum NIES-26                   | GTPase [Nostoc minutum NIES-26].                                          | GCA_003326215.1 |
| RCJ41185.1 | <-TM  ?→  <-?  ?→  <-?  ?→ LRR-repeats+AP-GTPase+COR+TM+TM*→                                                                                                     | LRR-repeats+AP-GTPase+COR+TM+TM   | 837  | A6770_08860 | Cyanobacteria       | Nostoc minutum NIES-26                   | hypothetical protein A6770_08860 [Nostoc minutum NIES-26].                | GCA_003326215.1 |
| RCV66029.1 | LRR-repeats+AP-GTPase+COR→?→  <-?<-?  ?→  <-?<-?  LRR-repeats→ LRR-repeats+AP-GTPase+COR→                                                                        | LRR-repeats+AP-GTPase+COR         | 640  | C5S53_00730 | Euryarchaeota       | Methanophagales archaeon                 | GTPase SAR1 family protein [Methanophagales archaeon].                    | GCA_003336485.1 |
| RCV66037.1 | LRR-repeats+AP-GTPase+COR*→                                                                                                                                      | LRR-repeats+AP-GTPase+COR         | 730  | C5S53_00775 | Euryarchaeota       | Methanophagales archaeon                 | Leucine-rich repeat (LRR) protein [Methanophagales archaeon].             | GCA_003336485.1 |
| REJ39442.1 | SIG+TM+TM+TM+TM+TM+TM+TM+TM+TM→  <-?  Mbetalac→ SAM-methylase→?→  <-?<-SIG+TPM_phosphatase+TM+TM+TM  PSE→                                                        | LRR-repeats+AP-GTPase+COR+TM+TM   | 898  | DWQ54_21980 | Cyanobacteria       | Microcystis flos-aquae TF09              | GTP-binding protein [Microcystis flos-aquae TF09].                        | GCA_003390815.1 |
| REJ48778.1 | SIG+TM+TM+TM+TM+TM+TM+TM+TM+TM→  <-?  Mbetalac→ SAM-methylase→?→  <-?<-SIG+TPM_phosphatase+TM+TM+TM  PSE→                                                        | LRR-repeats+AP-GTPase+COR+TM+TM   | 852  | DWQ53_05035 | Cyanobacteria       | Microcystis flos-aquae DF17              | GTP-binding protein [Microcystis flos-aquae DF17].                        | GCA_003389435.1 |
| REJ60675.1 | SIG+TM+TM+TM+TM+TM+TM+TM+TM+TM→  <-?  Mbetalac→ SAM-methylase→?→  <-?<-SIG+TPM_phosphatase+TM+TM+TM  PSE→                                                        | LRR-repeats+AP-GTPase+COR+TM+TM   | 826  | DWQ56_05670 | Cyanobacteria       | Microcystis aeruginosa DA14              | GTP-binding protein [Microcystis aeruginosa DA14].                        | GCA_003388675.1 |

| acc        | operon                                                                                               | architecture                      | len  | gen.name        | taxend              | species                              | define                                                                         | gca             |
|------------|------------------------------------------------------------------------------------------------------|-----------------------------------|------|-----------------|---------------------|--------------------------------------|--------------------------------------------------------------------------------|-----------------|
| RFP53135.1 | LRR-repeats+AP-GTPase+COR*→  <?  ?→  <-tRNA  ?→?→ Cluster1088_2clades→                               | LRR-repeats+AP-GTPase+COR         | 695  | BJG00_017645    | Cyanobacteria       | Limnothrix sp. CACIAM 69d            | hypothetical protein BJG00_017645 [Limnothrix sp. CACIAM 69d].                 | GCA_001913845.2 |
| RFP63081.1 | <-CR-REase5  LRR-repeats+AP-GTPase+COR*→ LRR-repeats→                                                | LRR-repeats+AP-GTPase+COR         | 886  | BJG00_001105    | Cyanobacteria       | Limnothrix sp. CACIAM 69d            | GTPase [Limnothrix sp. CACIAM 69d].                                            | GCA_001913845.2 |
| RIK29270.1 | LRR-repeats+AP-GTPase+COR*→  <-?<-?<-Mbetalac<-?<-ABC-ATPase<-TM+TM+TM+TM+TM                         | LRR-repeats+AP-GTPase+COR         | 1096 | DCC56_13010     | Chloroflexi         | Anaerolineae bacterium               | hypothetical protein DCC56_13010 [Anaerolineae bacterium].                     | GCA_003577395.1 |
| RJO63533.1 | LRR-repeats+AP-GTPase+COR*→                                                                          | LRR-repeats+AP-GTPase+COR         | 1030 | C4523_20060     | Deltaproteobacteria | Myxococcales bacterium               | hypothetical protein C4523_20060 [Myxococcales bacterium].                     | GCA_003598065.1 |
| RJP51705.1 | TM+TM+TM+TM+TM+TM+TM+TM+TM→?→?→  <-?  ?→ Cluster1070_2clades→ REase→                                 | LRR-repeats+AP-GTPase+COR         | 984  | C4583_08075     | Chloroflexi         | Anaerolineaceae bacterium            | hypothetical protein C4583_08075 [Anaerolineaceae bacterium].                  | GCA_003598975.1 |
| RKS02636.1 | LRR-repeats+AP-GTPase+COR*→  <-?  ?→?→?→  <-Cluster1854_2clades<br>LRR-repeats+AP-GTPase+COR+TM+TM*→ | LRR-repeats+AP-GTPase+COR+TM+TM   | 1044 | C8C84_2360      | Bacteroidetes       | Flavobacterium sp. 102               | RocCOR-like putative regulator of kinase activity [Flavobacterium sp. 102].    | GCA_003634615.1 |
| RKZ87118.1 | LRR-repeats+AP-GTPase+COR*→ AP-GTPase+COR→ COR→                                                      | LRR-repeats+AP-GTPase+COR         | 159  | DRR19_14025     | Gammaproteobacteria | Gammaproteobacteria bacterium        | hypothetical protein DRR19_14025 [Gammaproteobacteria bacterium].              | GCA_003646175.1 |
| RKZ92191.1 | LRR-repeats+AP-GTPase+COR*→                                                                          | LRR-repeats+AP-GTPase+COR         | 778  | DRR19_04995     | Gammaproteobacteria | Gammaproteobacteria bacterium        | hypothetical protein DRR19_04995 [Gammaproteobacteria bacterium].              | GCA_003646175.1 |
| RLC02552.1 | LRR-repeats+AP-GTPase+COR*→                                                                          | LRR-repeats+AP-GTPase+COR         | 868  | DRI57_29970     | Deltaproteobacteria | Deltaproteobacteria bacterium        | hypothetical protein DRI57_29970, partial [Deltaproteobacteria bacterium].     | GCA_003647425.1 |
| RLC14341.1 | LRR-repeats+AP-GTPase+COR*→                                                                          | LRR-repeats+AP-GTPase+COR         | 442  | DRI57_14615     | Deltaproteobacteria | Deltaproteobacteria bacterium        | hypothetical protein DRI57_14615, partial [Deltaproteobacteria bacterium].     | GCA_003647425.1 |
| RLC16559.1 | LRR-repeats+AP-GTPase+COR*→                                                                          | LRR-repeats+AP-GTPase+COR         | 930  | DRI57_11050     | Deltaproteobacteria | Deltaproteobacteria bacterium        | hypothetical protein DRI57_11050 [Deltaproteobacteria bacterium].              | GCA_003647425.1 |
| RLD05606.1 | UvsW-A18→ LRR-repeats+AP-GTPase+COR+TIR*→                                                            | LRR-repeats+AP-GTPase+COR+TIR     | 759  | DRI32_03940     | Chloroflexi         | Chloroflexi bacterium                | GTP-binding protein [Chloroflexi bacterium].                                   | GCA_003648185.1 |
| RLS84177.1 | SIG+AP-GTPase+COR+TIR→ FGS+LRR-repeats+AP-GTPase+COR+TIR→                                            | SIG+AP-GTPase+COR+TIR             | 879  | DWI04_01885     | Planctomycetes      | Planctomycetes bacterium             | TIR domain-containing protein, partial [Planctomycetes bacterium].             | GCA_003669255.1 |
| RLS84178.1 | FGS+LRR-repeats+AP-GTPase+COR+TIR*→                                                                  | FGS+LRR-repeats+AP-GTPase+COR+TIR | 1292 | DWI04_01890     | Planctomycetes      | Planctomycetes bacterium             | hypothetical protein DWI04_01890, partial [Planctomycetes bacterium].          | GCA_003669255.1 |
| RME07294.1 | RVT→?→ LRR-repeats+AP-GTPase+COR*→                                                                   | LRR-repeats+AP-GTPase+COR         | 780  | D6816_06800     | Bacteroidetes       | Bacteroidetes bacterium              | hypothetical protein D6816_06800 [Bacteroidetes bacterium].                    | GCA_003694615.1 |
| RMG75718.1 | LRR-repeats+AP-GTPase+COR*→?→ FGS→                                                                   | LRR-repeats+AP-GTPase+COR         | 691  | D6722_00510     | Bacteroidetes       | Bacteroidetes bacterium              | hypothetical protein D6722_00510 [Bacteroidetes bacterium].                    | GCA_003696875.1 |
| RPH24755.1 | LRR-repeats+AP-GTPase+COR*→                                                                          | LRR-repeats+AP-GTPase+COR         | 627  | EHM93_20250     | Bacteroidetes       | Bacteroidales bacterium              | GTP-binding protein, partial [Bacteroidales bacterium].                        | GCA_003818205.1 |
| RPI17218.1 | LRR-repeats+AP-GTPase+COR*→                                                                          | LRR-repeats+AP-GTPase+COR         | 944  | EHM58_10175     | Ignavibacteriae     | Ignavibacteriae bacterium            | GTP-binding protein [Ignavibacteriae bacterium].                               | GCA_003820375.1 |
| RPJ19448.1 | LRR-repeats+AP-GTPase+COR*→                                                                          | LRR-repeats+AP-GTPase+COR         | 750  | EHM33_30260     | Chloroflexi         | Chloroflexi bacterium                | hypothetical protein EHM33_30260, partial [Chloroflexi bacterium].             | GCA_003820175.1 |
| RPJ72349.1 | LRR-repeats+AP-GTPase+COR*→                                                                          | LRR-repeats+AP-GTPase+COR         | 496  | EHM20_13865     | Alphaproteobacteria | Alphaproteobacteria bacterium        | GTP-binding protein, partial [Alphaproteobacteria bacterium].                  | GCA_003820255.1 |
| RQW02493.1 | LRR-repeats+AP-GTPase+COR+DrHyd*→?→?→ Cluster1207_2clades→?→ Cluster2271_2clades→                    | LRR-repeats+AP-GTPase+COR+DrHyd   | 763  | EH223_12385     | Bacteria            | candidate division KSB1 bacterium    | hypothetical protein EH223_12385, partial [candidate division KSB1 bacterium]. | GCA_003854975.1 |
| RUR83995.1 | <-Cluster5_5clades  LRR-repeats→ LRR-repeats+AP-GTPase+COR+DUF4404*→  <-?<-ABC-ATPase  ?→  <-REC     | LRR-repeats+AP-GTPase+COR+DUF4404 | 746  | DSM107007_30530 | Cyanobacteria       | Nostoc sp. PCC 7120 = FACHB-418      | hypothetical protein DSM107007_30530 [Nostoc sp. PCC 7120 = FACHB-418].        | GCA_003990585.1 |
| RWX44973.1 | <-Cluster1731_2clades<-?<-?  ?→?→ LRR-repeats+AP-GTPase+COR*→?→?→  <-Cluster1409_2clades             | LRR-repeats+AP-GTPase+COR         | 648  | H206_01140      | Deltaproteobacteria | Candidatus Electrothrix aarhusiensis | hypothetical protein H206_01140 [Candidatus Electrothrix aarhusiensis].        | GCA_004028505.1 |

| acc        | operon                                                                                                                                  | architecture                       | len  | gen.name            | taxend              | species                              | define                                                                           | gca             |
|------------|-----------------------------------------------------------------------------------------------------------------------------------------|------------------------------------|------|---------------------|---------------------|--------------------------------------|----------------------------------------------------------------------------------|-----------------|
| RWX45664.1 | <-S18-HTH<-Cluster1004_3clades<-Cluster2139_2clades<-?<-?<-?  ?→ LRR-repeats+AP-GTPase+COR*→                                            | LRR-repeats+AP-GTPase+COR          | 605  | H206_01449          | Deltaproteobacteria | Candidatus Electrothrix aarhusiensis | hypothetical protein H206_01449 [Candidatus Electrothrix aarhusiensis].          | GCA_004028505.1 |
| RWX46469.1 | Aminotran_1_2→  <-ABC-ATPase<-?<-?<-?<-?  LRR-repeats+AP-GTPase+COR*→                                                                   | LRR-repeats+AP-GTPase+COR          | 908  | H206_00859          | Deltaproteobacteria | Candidatus Electrothrix aarhusiensis | internalin A [Candidatus Electrothrix aarhusiensis].                             | GCA_004028505.1 |
| RWX47043.1 | LRR-repeats+AP-GTPase+COR+TM+TM+TM*→ WCAK→                                                                                              | LRR-repeats+AP-GTPase+COR+TM+TM+TM | 873  | H206_03377          | Deltaproteobacteria | Candidatus Electrothrix aarhusiensis | Ras of Complex, Roc, domain of DAPkinase [Candidatus Electrothrix aarhusiensis]. | GCA_004028505.1 |
| RWX51844.1 | LRR-repeats+AP-GTPase+COR*→                                                                                                             | LRR-repeats+AP-GTPase+COR          | 785  | VU01_10733          | Deltaproteobacteria | Candidatus Electrothrix marina       | hypothetical protein VU01_10733 [Candidatus Electrothrix marina].                | GCA_004028495.1 |
| RYD26380.1 | LRR-repeats+AP-GTPase+COR*→                                                                                                             | LRR-repeats+AP-GTPase+COR          | 442  | EOP86_26045         | Verrucomicrobia     | Verrucomicrobiaceae bacterium        | hypothetical protein EOP86_26045, partial [Verrucomicrobiaceae bacterium].       | GCA_004143925.1 |
| RYD41313.1 | LRR-repeats+AP-GTPase+COR*→                                                                                                             | LRR-repeats+AP-GTPase+COR          | 546  | EOP85_12890         | Verrucomicrobia     | Verrucomicrobiaceae bacterium        | hypothetical protein EOP85_12890, partial [Verrucomicrobiaceae bacterium].       | GCA_004144085.1 |
| RYD45970.1 | LRR-repeats+AP-GTPase*→                                                                                                                 | LRR-repeats+AP-GTPase              | 529  | EOP85_08340         | Verrucomicrobia     | Verrucomicrobiaceae bacterium        | hypothetical protein EOP85_08340, partial [Verrucomicrobiaceae bacterium].       | GCA_004144085.1 |
| RYD85024.1 | LRR-repeats+AP-GTPase+COR+TIR*→                                                                                                         | LRR-repeats+AP-GTPase+COR+TIR      | 722  | EOP84_03815         | Verrucomicrobia     | Verrucomicrobiaceae bacterium        | TIR domain-containing protein, partial [Verrucomicrobiaceae bacterium].          | GCA_004144095.1 |
| RYE22211.1 | LRR-repeats+AP-GTPase+COR*→                                                                                                             | LRR-repeats+AP-GTPase+COR          | 770  | EOP45_08535         | Bacteroidetes       | Sphingobacteriaceae bacterium        | GTPase, partial [Sphingobacteriaceae bacterium].                                 | GCA_004144285.1 |
| RYE59584.1 | LRR-repeats+AP-GTPase+COR+TIR*→                                                                                                         | LRR-repeats+AP-GTPase+COR+TIR      | 1318 | EOP48_00430         | Bacteroidetes       | Sphingobacteriales bacterium         | TIR domain-containing protein [Sphingobacteriales bacterium].                    | GCA_004144425.1 |
| RYF36188.1 | LRR-repeats+AP-GTPase*→                                                                                                                 | LRR-repeats+AP-GTPase              | 370  | EOO38_28030         | Bacteroidetes       | Cytophagaceae bacterium              | hypothetical protein EOO38_28030, partial [Cytophagaceae bacterium].             | GCA_004145185.1 |
| RYY12294.1 | LRR-repeats+AP-GTPase*→                                                                                                                 | LRR-repeats+AP-GTPase              | 540  | EOO04_33805         | Bacteroidetes       | Chitinophagaceae bacterium           | hypothetical protein EOO04_33805, partial [Chitinophagaceae bacterium].          | GCA_004172945.1 |
| RYZ86256.1 | LRR-repeats→ AP-GTPase+COR*→                                                                                                            | AP-GTPase+COR                      | 573  | EOP04_14245         | Proteobacteria      | Proteobacteria bacterium             | hypothetical protein EOP04_14245, partial [Proteobacteria bacterium].            | GCA_004193275.1 |
| RZK07337.1 | LRR-repeats+AP-GTPase*→                                                                                                                 | LRR-repeats+AP-GTPase              | 262  | EOO43_21605         | Bacteroidetes       | Flavobacterium sp.                   | hypothetical protein EOO43_21605, partial [Flavobacterium sp.].                  | GCA_004211555.1 |
| RZK10466.1 | LRR-repeats+AP-GTPase+COR*→                                                                                                             | LRR-repeats+AP-GTPase+COR          | 421  | EOO43_20245         | Bacteroidetes       | Flavobacterium sp.                   | hypothetical protein EOO43_20245, partial [Flavobacterium sp.].                  | GCA_004211555.1 |
| RZN33809.1 | pc1599→ Cluster1746_2clades→?→?→ Calcineurin→  <-tRNA  LRR-repeats+AP-GTPase+COR+TM+TM*→?→ Aminotran_1_2→  <-?<-?  Cluster1483_2clades→ | LRR-repeats+AP-GTPase+COR+TM+TM    | 832  | EF813_10660         | Euryarchaeota       | Methanosarcinales archaeon           | GTP-binding protein [Methanosarcinales archaeon].                                | GCA_004211975.1 |
| SCD37814.1 | LRR-repeats+AP-GTPase+COR*→  <-NUDIX                                                                                                    | LRR-repeats+AP-GTPase+COR          | 1358 | GA0115243_1012136   | Actinobacteria      | Streptomyces sp. ScaeMP-e83          | Leucine-rich repeat (LRR) protein, partial [Streptomyces sp. ScaeMP-e83].        | GCA_900091775.1 |
| SDD54826.1 | Mbetalac→?→ LRR-repeats+AP-GTPase+COR*→  <-?<-ICLR-HTH  ?→?→?→ ABhydrolase→                                                             | LRR-repeats+AP-GTPase+COR          | 887  | SAMN05660690_4513   | Actinobacteria      | Geodermatophilus telluris            | Leucine rich repeat-containing protein [Geodermatophilus telluris].              | GCA_900102745.1 |
| SEA38734.1 | LRR-repeats+AP-GTPase+COR+TIR*→?→?→  <-Thioredoxin  YBAK→                                                                               | LRR-repeats+AP-GTPase+COR+TIR      | 849  | SAMN05660964_01466  | Gammaproteobacteria | Thiothrix caldifontis                | Leucine Rich repeat-containing protein [Thiothrix caldifontis].                  | GCA_900107695.1 |
| SEM73063.1 | <-ABC-ATPase<-?  ?→?→  <-?  LRR-repeats+AP-GTPase+COR*→?→?→?→  <-?<-?<-SIR2                                                             | LRR-repeats+AP-GTPase+COR          | 717  | SAMN05660976_05948  | Actinobacteria      | Nonomuraea pusilla                   | GTPase SAR1 family protein [Nonomuraea pusilla].                                 | GCA_900109355.1 |
| SFG01605.1 | LRR-repeats+AP-GTPase+COR+TIR*→                                                                                                         | LRR-repeats+AP-GTPase+COR+TIR      | 812  | SAMN05216175_102423 | Gammaproteobacteria | Neptunomonas qingdaonensis           | internalin A, partial [Neptunomonas qingdaonensis].                              | GCA_900113275.1 |



| acc        | operon                                                                                                                  | architecture                      | len  | gen.name    | taxend        | species                        | define                                                                      | gca             |
|------------|-------------------------------------------------------------------------------------------------------------------------|-----------------------------------|------|-------------|---------------|--------------------------------|-----------------------------------------------------------------------------|-----------------|
| TAE14819.1 | <-Pkinase+TM  ?→ PIN→ LRR-repeats+AP-GTPase+COR*→                                                                       | LRR-repeats+AP-GTPase+COR         | 769  | EAZ95_09495 | Bacteroidetes | Bacteroidetes bacterium        | GTP-binding protein [Bacteroidetes bacterium].                              | GCA_004292795.1 |
| TAE15606.1 | LRR-repeats+AP-GTPase+COR*→                                                                                             | LRR-repeats+AP-GTPase+COR         | 866  | EAZ95_08545 | Bacteroidetes | Bacteroidetes bacterium        | GTP-binding protein [Bacteroidetes bacterium].                              | GCA_004292795.1 |
| TAE15646.1 | <-CR-REase5<-?<-?  LRR-repeats→?→ PSE→ LRR-repeats+AP-GTPase+COR*→?→?→?→  <-?<-PSE<-?  Pentapeptide-repeats→            | LRR-repeats+AP-GTPase+COR         | 1106 | EAZ94_03785 | Cyanobacteria | Oscillatoriales cyanobacterium | GTP-binding protein [Oscillatoriales cyanobacterium].                       | GCA_004292775.1 |
| TAE18080.1 | <-ABC_membrane+ABC_tran  ?→?→ LRR-repeats+AP-GTPase+COR*→                                                               | LRR-repeats+AP-GTPase+COR         | 778  | EAZ95_05200 | Bacteroidetes | Bacteroidetes bacterium        | hypothetical protein EAZ95_05200 [Bacteroidetes bacterium].                 | GCA_004292795.1 |
| TAE30098.1 | LRR-repeats→ LRR-repeats+AP-GTPase+COR+DUF4404*→?→?→  <-Pentapeptide-repeats                                            | LRR-repeats+AP-GTPase+COR+DUF4404 | 1078 | EAZ93_01305 | Cyanobacteria | Oscillatoriales cyanobacterium | GTPase [Oscillatoriales cyanobacterium].                                    | GCA_004292845.1 |
| TAE37012.1 | LRR-repeats+AP-GTPase+COR+DUF4404*→?→?→  <-Pentapeptide-repeats                                                         | LRR-repeats+AP-GTPase+COR+DUF4404 | 1282 | EAZ90_27320 | Cyanobacteria | Oscillatoriales cyanobacterium | GTPase [Oscillatoriales cyanobacterium].                                    | GCA_004292895.1 |
| TAE38303.1 | LRR-repeats+AP-GTPase+COR*→?→?→ PSE→?→ PSE→?→?→  <-?<-PSE<-?  Pentapeptide-repeats→                                     | LRR-repeats+AP-GTPase+COR         | 909  | EAZ90_25170 | Cyanobacteria | Oscillatoriales cyanobacterium | GTP-binding protein [Oscillatoriales cyanobacterium].                       | GCA_004292895.1 |
| TAE48904.1 | LRR-repeats→?→?→?→ LRR-repeats+AP-GTPase+COR*→                                                                          | LRR-repeats+AP-GTPase+COR         | 695  | EAZ88_23370 | Cyanobacteria | Oscillatoriales cyanobacterium | GTP-binding protein, partial [Oscillatoriales cyanobacterium].              | GCA_004292945.1 |
| TAE51174.1 | LRR-repeats+AP-GTPase+COR*→                                                                                             | LRR-repeats+AP-GTPase+COR         | 790  | EAZ89_10570 | Bacteroidetes | Bacteroidetes bacterium        | hypothetical protein EAZ89_10570, partial [Bacteroidetes bacterium].        | GCA_004292985.1 |
| TAE53250.1 | LRR-repeats+AP-GTPase+COR*→                                                                                             | LRR-repeats+AP-GTPase+COR         | 912  | EAZ88_12540 | Cyanobacteria | Oscillatoriales cyanobacterium | hypothetical protein EAZ88_12540 [Oscillatoriales cyanobacterium].          | GCA_004292945.1 |
| TAE59343.1 | LRR-repeats+AP-GTPase+COR+EAD11*→                                                                                       | LRR-repeats+AP-GTPase+COR+EAD11   | 737  | EAZ89_02575 | Bacteroidetes | Bacteroidetes bacterium        | hypothetical protein EAZ89_02575 [Bacteroidetes bacterium].                 | GCA_004292985.1 |
| TAE66346.1 | LRR-repeats+AP-GTPase+COR*→                                                                                             | LRR-repeats+AP-GTPase+COR         | 742  | EAZ85_15975 | Bacteroidetes | Bacteroidetes bacterium        | GTP-binding protein, partial [Bacteroidetes bacterium].                     | GCA_004293265.1 |
| TAE67608.1 | LRR-repeats+AP-GTPase+COR*→                                                                                             | LRR-repeats+AP-GTPase+COR         | 911  | EAZ86_16170 | Cyanobacteria | Oscillatoriales cyanobacterium | hypothetical protein EAZ86_16170 [Oscillatoriales cyanobacterium].          | GCA_004292955.1 |
| TAE67866.1 | FGS→?→ LRR-repeats+AP-GTPase+COR*→                                                                                      | LRR-repeats+AP-GTPase+COR         | 987  | EAZ85_14755 | Bacteroidetes | Bacteroidetes bacterium        | hypothetical protein EAZ85_14755 [Bacteroidetes bacterium].                 | GCA_004293265.1 |
| TAE68409.1 | <-CR-REase5<-?<-?  ?→  <-?  LRR-repeats→?→?→ LRR-repeats+AP-GTPase+COR*→?→?→?→ PSE→  <-?<-PSE<-?  Pentapeptide-repeats→ | LRR-repeats+AP-GTPase+COR         | 1061 | EAZ86_13565 | Cyanobacteria | Oscillatoriales cyanobacterium | GTP-binding protein [Oscillatoriales cyanobacterium].                       | GCA_004292955.1 |
| TAE73426.1 | LRR-repeats+AP-GTPase+COR*→                                                                                             | LRR-repeats+AP-GTPase+COR         | 1078 | EAZ85_07065 | Bacteroidetes | Bacteroidetes bacterium        | hypothetical protein EAZ85_07065 [Bacteroidetes bacterium].                 | GCA_004293265.1 |
| TAE76344.1 | LRR-repeats+AP-GTPase+COR*→  <-Cluster1921_2clades                                                                      | LRR-repeats+AP-GTPase+COR         | 919  | EAZ85_00290 | Bacteroidetes | Bacteroidetes bacterium        | hypothetical protein EAZ85_00290 [Bacteroidetes bacterium].                 | GCA_004293265.1 |
| TAE86412.1 | LRR-repeats+AP-GTPase+COR+TIR*→  <-?<-Cluster409_3clades                                                                | LRR-repeats+AP-GTPase+COR+TIR     | 1151 | EAY81_05595 | Bacteroidetes | Bacteroidetes bacterium        | TIR domain-containing protein [Bacteroidetes bacterium].                    | GCA_004293295.1 |
| TAF49891.1 | LRR-repeats+AP-GTPase+COR+DUF4404*→                                                                                     | LRR-repeats+AP-GTPase+COR+DUF4404 | 845  | EAZ61_13785 | Cyanobacteria | Oscillatoriales cyanobacterium | GTPase, partial [Oscillatoriales cyanobacterium].                           | GCA_004293855.1 |
| TAF64535.1 | LRR-repeats+AP-GTPase+COR+EAD11*→                                                                                       | LRR-repeats+AP-GTPase+COR+EAD11   | 1108 | EAZ55_10760 | Bacteroidetes | Cytophagales bacterium         | hypothetical protein EAZ55_10760 [Cytophagales bacterium].                  | GCA_004293905.1 |
| TAF89999.1 | GTPase-AIG→?→?→  <-?<-?  LRR-repeats+AP-GTPase+COR+DUF4404*→?→?→  <-Pentapeptide-repeats                                | LRR-repeats+AP-GTPase+COR+DUF4404 | 1282 | EAZ49_10560 | Cyanobacteria | Oscillatoriales cyanobacterium | GTPase [Oscillatoriales cyanobacterium].                                    | GCA_004294035.1 |
| TAF91931.1 | <-CR-REase5<-?<-?  LRR-repeats→?→?→ LRR-repeats+AP-GTPase+COR*→?→?→?→ PSE→  <-?<-PSE<-?  Pentapeptide-repeats→          | LRR-repeats+AP-GTPase+COR         | 952  | EAZ49_03665 | Cyanobacteria | Oscillatoriales cyanobacterium | GTP-binding protein [Oscillatoriales cyanobacterium].                       | GCA_004294035.1 |
| TAG07081.1 | RVT→?→ LRR-repeats+AP-GTPase+COR+ACYC*→?→  <-?<-?<-HISKIN                                                               | LRR-repeats+AP-GTPase+COR+ACYC    | 962  | EAZ44_01180 | Bacteroidetes | Cytophagia bacterium           | hypothetical protein EAZ44_01180 [Cytophagia bacterium].                    | GCA_004294005.1 |
| TAG17458.1 | <-CENPB  ?→?→  <-?<-?  Aminotran_1_2→ LRR-repeats+AP-GTPase+COR*→                                                       | LRR-repeats+AP-GTPase+COR         | 975  | EAZ38_17395 | Bacteroidetes | Cytophagales bacterium         | hypothetical protein EAZ38_17395 [Cytophagales bacterium].                  | GCA_004293585.1 |
| TAG62903.1 | LRR-repeats+AP-GTPase+COR*→                                                                                             | LRR-repeats+AP-GTPase+COR         | 778  | EAZ28_01955 | Cyanobacteria | Oscillatoriales cyanobacterium | hypothetical protein EAZ28_01955, partial [Oscillatoriales cyanobacterium]. | GCA_004294275.1 |



| acc        | operon                                                                                                                                         | architecture                    | len  | gen.name    | taxend              | species                                    | define                                                                         | gca             |
|------------|------------------------------------------------------------------------------------------------------------------------------------------------|---------------------------------|------|-------------|---------------------|--------------------------------------------|--------------------------------------------------------------------------------|-----------------|
| TAG65048.1 | LRR-repeats→?→ PSE→ LRR-repeats+AP-GTPase+COR*→ PSE→?→?→ PSE→  <-?<-PSE<-?  Pentapeptide-repeats→                                              | LRR-repeats+AP-GTPase+COR       | 939  | EAZ25_17645 | Cyanobacteria       | Oscillatoriales cyanobacterium             | GTP-binding protein [Oscillatoriales cyanobacterium].                          | GCA_004294345.1 |
| TAG86009.1 | LRR-repeats+AP-GTPase+COR*→                                                                                                                    | LRR-repeats+AP-GTPase+COR       | 565  | EAZ18_26350 | Cyanobacteria       | Oscillatoriales cyanobacterium             | GTP-binding protein, partial [Oscillatoriales cyanobacterium].                 | GCA_004294385.1 |
| TAG86671.1 | LRR-repeats+AP-GTPase+COR*→                                                                                                                    | LRR-repeats+AP-GTPase+COR       | 892  | EAZ20_12320 | Bacteroidetes       | Bacteroidetes bacterium                    | hypothetical protein EAZ20_12320, partial [Bacteroidetes bacterium].           | GCA_004294185.1 |
| TAG91526.1 | FGS→?→ LRR-repeats+AP-GTPase*→                                                                                                                 | LRR-repeats+AP-GTPase           | 279  | EAZ20_03245 | Bacteroidetes       | Bacteroidetes bacterium                    | hypothetical protein EAZ20_03245, partial [Bacteroidetes bacterium].           | GCA_004294185.1 |
| TAG93154.1 | LRR-repeats+AP-GTPase+COR*→                                                                                                                    | LRR-repeats+AP-GTPase+COR       | 935  | EAZ19_16680 | Cyanobacteria       | Oscillatoriales cyanobacterium             | hypothetical protein EAZ19_16680 [Oscillatoriales cyanobacterium].             | GCA_004293705.1 |
| TAH14728.1 | LRR-repeats+AP-GTPase+COR*→                                                                                                                    | LRR-repeats+AP-GTPase+COR       | 344  | EAZ09_26195 | Cyanobacteria       | Oscillatoriales cyanobacterium             | GTP-binding protein, partial [Oscillatoriales cyanobacterium].                 | GCA_004293745.1 |
| TAH21032.1 | Cluster1569_2clades→ ABhydrolase→  <-?  ?→?→?→  <-?  LRR-repeats+AP-GTPase*→                                                                   | LRR-repeats+AP-GTPase           | 257  | EAZ08_04815 | Bacteroidetes       | Cytophagales bacterium                     | hypothetical protein EAZ08_04815 [Cytophagales bacterium].                     | GCA_004294445.1 |
| TAK37700.1 | LRR-repeats+AP-GTPase+COR+EAD11*→ Cluster5_5clades→?→ METHYLASE→                                                                               | LRR-repeats+AP-GTPase+COR+EAD11 | 783  | EPO28_11660 | Bacteroidetes       | Saprospiraceae bacterium                   | hypothetical protein EPO28_11660 [Saprospiraceae bacterium].                   | GCA_004297645.1 |
| TAK50544.1 | Cluster1854_2clades→?→?→ PSE→?→?→  <-Cluster5_5clades  LRR-repeats→ LRR-repeats+AP-GTPase+COR+EAD11*→?→?→?→?→ ABhydrolase→  <-Cluster5_5clades | LRR-repeats+AP-GTPase+COR+EAD11 | 588  | EPO28_00120 | Bacteroidetes       | Saprospiraceae bacterium                   | hypothetical protein EPO28_00120 [Saprospiraceae bacterium].                   | GCA_004297645.1 |
| TAK57982.1 | HhH-RADC+JAB→  <-?  ?→ LRR-repeats+AP-GTPase+COR*→                                                                                             | LRR-repeats+AP-GTPase+COR       | 666  | EPO24_09130 | Bacteroidetes       | Bacteroidetes bacterium                    | GTP-binding protein, partial [Bacteroidetes bacterium].                        | GCA_004322375.1 |
| TAK59812.1 | LRR-repeats+AP-GTPase+COR+TIR*→ tRNA→ tRNA→?→?→ Cluster2248_2clades→                                                                           | LRR-repeats+AP-GTPase+COR+TIR   | 884  | EPO24_07295 | Bacteroidetes       | Bacteroidetes bacterium                    | TIR domain-containing protein [Bacteroidetes bacterium].                       | GCA_004322375.1 |
| TAK63714.1 | LRR-repeats+AP-GTPase+COR+TIR*→                                                                                                                | LRR-repeats+AP-GTPase+COR+TIR   | 903  | EPO24_03975 | Bacteroidetes       | Bacteroidetes bacterium                    | TIR domain-containing protein [Bacteroidetes bacterium].                       | GCA_004322375.1 |
| TFV86935.1 | LRR-repeats+AP-GTPase+COR+DrHyd*→                                                                                                              | LRR-repeats+AP-GTPase+COR+DrHyd | 783  | E4K72_22790 | Betaproteobacteria  | Oxalobacteraceae bacterium OM1             | hypothetical protein E4K72_22790, partial [Oxalobacteraceae bacterium OM1].    | GCA_004570315.1 |
| THV28317.1 | TM→ LRR-repeats+AP-GTPase+COR*→                                                                                                                | LRR-repeats+AP-GTPase+COR       | 1065 | E9998_11935 | Actinobacteria      | Glycomyces paridis                         | hypothetical protein E9998_11935 [Glycomyces paridis].                         | GCA_004912155.1 |
| TKJ39119.1 | SIGMA-HTH→?→?→  <-?<-?<-?  LRR-repeats+AP-GTPase+COR*→  <-?<-Ferredoxin-RRM                                                                    | LRR-repeats+AP-GTPase+COR       | 968  | CEE37_11920 | FCB group           | candidate division LCP-89 bacterium B3_LCP | GTPase [candidate division LCP-89 bacterium B3_LCP].                           | GCA_005223185.1 |
| TKJ40235.1 | HISKIN→?→?→?→?→ ACET→ LRR-repeats+AP-GTPase+COR*→?→?→  <-?<-?<-SMPB  ?→ Cluster1833_2clades→                                                   | LRR-repeats+AP-GTPase+COR       | 925  | CEE37_07880 | FCB group           | candidate division LCP-89 bacterium B3_LCP | GTPase [candidate division LCP-89 bacterium B3_LCP].                           | GCA_005223185.1 |
| TKJ41682.1 | TPR+TPR→?→?→ RPN10→?→?→ LRR-repeats+AP-GTPase+COR*→  <-?  LRR-repeats+AP-GTPase+COR→  <-?<-tRNA  RADICAL-SAM→  <-tRNA<-MerR-HTH                | LRR-repeats+AP-GTPase+COR       | 1047 | CEE37_03700 | FCB group           | candidate division LCP-89 bacterium B3_LCP | hypothetical protein CEE37_03700 [candidate division LCP-89 bacterium B3_LCP]. | GCA_005223185.1 |
| TKZ22725.1 | LRR-repeats+AP-GTPase+COR*→  <-?  COR→                                                                                                         | LRR-repeats+AP-GTPase+COR       | 653  | EBE85_34345 | Cyanobacteria       | Hormosilla sp. GUM007                      | hypothetical protein EBE85_34345 [Hormosilla sp. GUM007].                      | -               |
| TKZ31764.1 | Cluster1207_2clades→  <-?<-?<-?<-?<-?<-?  LRR-repeats+AP-GTPase+COR*→ COR→                                                                     | LRR-repeats+AP-GTPase+COR       | 424  | EBE86_14970 | Cyanobacteria       | Hormosilla sp. GUM202                      | hypothetical protein EBE86_14970, partial [Hormosilla sp. GUM202].             | -               |
| TLU81885.1 | Cluster1765_2clades→  <-?<-?  InPase→  <-?  TM→ LRR-repeats+AP-GTPase+COR*→?→?→ ACT→  <-?<-?<-PSE<-DNAJ                                        | LRR-repeats+AP-GTPase+COR       | 953  | FDX21_09980 | Chlorobi            | Chlorobium sp.                             | hypothetical protein FDX21_09980 [Chlorobium sp.].                             | GCA_005862225.1 |
| TLU87350.1 | <-FGS<-?  ?→  <-?<-?  PSE→?→?→ LRR-repeats+AP-GTPase+COR+TIR*→  <-PSE<-RelE-ParE                                                               | LRR-repeats+AP-GTPase+COR+TIR   | 892  | FDX21_00465 | Chlorobi            | Chlorobium sp.                             | TIR domain-containing protein [Chlorobium sp.].                                | GCA_005862225.1 |
| TMQ13801.1 | LRR-repeats+AP-GTPase+COR*→ COR+TIR→                                                                                                           | LRR-repeats+AP-GTPase+COR       | 391  | E6J90_27900 | Deltaproteobacteria | Deltaproteobacteria bacterium              | GTP-binding protein, partial [Deltaproteobacteria bacterium].                  | GCA_005887915.1 |
| TRT70055.1 | LRR-repeats+AP-GTPase+COR+TM+TM*→                                                                                                              | LRR-repeats+AP-GTPase+COR+TM+TM | 710  | EWV84_09945 | Cyanobacteria       | Microcystis sp. M_QC_C_20170808_M3Col      | GTP-binding protein, partial [Microcystis sp. M_QC_C_20170808_M3Col].          | GCA_007095505.1 |
| TRT86788.1 | SIG+TM+TM+TM+TM+TM+TM+TM+TM→  <-?  Mbetalac→ SAM-methylase→?→  <-?<-SIG+TPM_phosphatase+TM+TM+TM  LRR-repeats+AP-GTPase+COR*→                  | LRR-repeats+AP-GTPase+COR       | 597  | EWV66_15420 | Cyanobacteria       | Microcystis sp. M_OC_Ca_00000000_C217Col   | GTP-binding protein, partial [Microcystis sp. M_OC_Ca_00000000_C217Col].       | GCA_007095585.1 |

| acc        | operon                                                                                                                                                                                        | architecture                      | len  | gen.name    | taxend              | species                                                 | define                                                                       | gca             |
|------------|-----------------------------------------------------------------------------------------------------------------------------------------------------------------------------------------------|-----------------------------------|------|-------------|---------------------|---------------------------------------------------------|------------------------------------------------------------------------------|-----------------|
| TRT92075.1 | Mbetalac→ SAM-methylase→?→  <?  ?→  <-SIG+TPM_phosphatase+TM+TM+TM  LRR-repeats+AP-GTPase+COR+TM+TM*→  <-?<-?<-?<-Pro_CA  ?→  <-?<-tRNA<tRNA<-Ferredoxin-beta                                 | LRR-repeats+AP-GTPase+COR+TM+TM   | 874  | EWV65_21090 | Cyanobacteria       | Microcystis flos-aquae Ma_QC_C_20070823_S18D            | GTP-binding protein [Microcystis flos-aquae Ma_QC_C_20070823_S18D].          | GCA_007095605.1 |
| TRU14937.1 | SIG+TM+TM+TM+TM+TM+TM+TM+TM→  <-?  Mbetalac→ SAM-methylase→?→  <-?<-SIG+TPM_phosphatase+TM+TM+TM  LRR-repeats+AP-GTPase+COR+TM+TM*→  <-?<-?<-?<-Pro_CA  ?→  <-?<-tRNA<tRNA<-Ferredoxin-beta   | LRR-repeats+AP-GTPase+COR+TM+TM   | 874  | EWV60_01670 | Cyanobacteria       | Microcystis sp. Msp_OC_L_20101000_S702                  | GTP-binding protein [Microcystis sp. Msp_OC_L_20101000_S702].                | GCA_007095705.1 |
| TRU25637.1 | LRR-repeats+AP-GTPase+COR+TM+TM*→  <-?<-FGS<-?<-?  ?→?→ Aminotran_1_2→                                                                                                                        | LRR-repeats+AP-GTPase+COR+TM+TM   | 921  | EWV79_07400 | Cyanobacteria       | Microcystis aeruginosa Ma_MB_S_20031200_S102Daeruginosa | GTP-binding protein [Microcystis aeruginosa Ma_MB_S_20031200_S102D].         | GCA_007095795.1 |
| TRU29987.1 | SIG+TM+TM+TM+TM+TM+TM+TM+TM→  <-?  Mbetalac→ SAM-methylase→?→  <-?<-SIG+TPM_phosphatase+TM+TM+TM  LRR-repeats+AP-GTPase+COR+TM+TM*→  <-?<-?<-?<-?<-Pro_CA                                     | LRR-repeats+AP-GTPase+COR+TM+TM   | 921  | EWV80_03065 | Cyanobacteria       | Microcystis aeruginosa Ma_QC_B_20070730_S2              | GTP-binding protein [Microcystis aeruginosa Ma_QC_B_20070730_S2].            | GCA_007095805.1 |
| TRU36579.1 | SIG+TM+TM+TM+TM+TM+TM+TM+TM→  <-PSE  Mbetalac→ SAM-methylase→?→  <-?<-SIG+TPM_phosphatase+TM+TM+TM  LRR-repeats+AP-GTPase+COR+TM+TM*→  <-?<-?<-?<-Pro_CA  ?→  <-?<-tRNA<tRNA<-Ferredoxin-beta | LRR-repeats+AP-GTPase+COR+TM+TM   | 805  | EWV78_08805 | Cyanobacteria       | Microcystis aeruginosa Ma_MB_F_20061100_S20D            | GTP-binding protein [Microcystis aeruginosa Ma_MB_F_20061100_S20D].          | GCA_007095855.1 |
| TRU47882.1 | CHTH→ LRR-repeats+AP-GTPase+COR+TM+TM*→                                                                                                                                                       | LRR-repeats+AP-GTPase+COR+TM+TM   | 874  | EWV49_14300 | Cyanobacteria       | Microcystis aeruginosa Ma_QC_Ch_20071001_S25            | GTP-binding protein [Microcystis aeruginosa Ma_QC_Ch_20071001_S25].          | GCA_007095935.1 |
| TRU57932.1 | CHTH→ LRR-repeats+AP-GTPase+COR*→                                                                                                                                                             | LRR-repeats+AP-GTPase+COR         | 559  | EWV56_15605 | Cyanobacteria       | Microcystis aeruginosa Ma_QC_C_20070823_S13D            | GTP-binding protein, partial [Microcystis aeruginosa Ma_QC_C_20070823_S13D]. | GCA_007095965.1 |
| TRU80903.1 | SIG+TM+TM+TM+TM+TM+TM+TM+TM→  <-?  Mbetalac→ SAM-methylase→?→  <-?<-SIG+TPM_phosphatase+TM+TM+TM  LRR-repeats+AP-GTPase+COR+TM+TM*→                                                           | LRR-repeats+AP-GTPase+COR+TM+TM   | 806  | EWV76_22185 | Cyanobacteria       | Microcystis novacekii Mn_MB_F_20050700_S1               | GTP-binding protein [Microcystis novacekii Mn_MB_F_20050700_S1].             | GCA_007096045.1 |
| TRU95593.1 | Ferredoxin-beta→ tRNA→ tRNA→ SAM-methylase→?→  <-?<-SIG+TPM_phosphatase+TM+TM+TM  LRR-repeats+AP-GTPase+COR+TM+TM*→  <-?<-?<-?<-Pro_CA                                                        | LRR-repeats+AP-GTPase+COR+TM+TM   | 852  | EWV73_20055 | Cyanobacteria       | Microcystis wesenbergii Mw_QC_B_20070930_S4D            | GTP-binding protein [Microcystis wesenbergii Mw_QC_B_20070930_S4D].          | GCA_007096105.1 |
| TRU97707.1 | Ferredoxin-beta→ tRNA→ tRNA→ SAM-methylase→?→  <-?<-SIG+TPM_phosphatase+TM+TM+TM  LRR-repeats+AP-GTPase+COR+TM+TM*→  <-?<-?<-?<-Pro_CA                                                        | LRR-repeats+AP-GTPase+COR+TM+TM   | 943  | EWV75_08635 | Cyanobacteria       | Microcystis wesenbergii Mw_QC_S_20081001_S30D           | GTP-binding protein [Microcystis wesenbergii Mw_QC_S_20081001_S30D].         | GCA_007096035.1 |
| TRU98843.1 | Ferredoxin-beta→ tRNA→ tRNA→ SAM-methylase→?→  <-?<-SIG+TPM_phosphatase+TM+TM+TM  LRR-repeats+AP-GTPase+COR+TM+TM*→  <-?<-?<-?<-Pro_CA                                                        | LRR-repeats+AP-GTPase+COR+TM+TM   | 920  | EWV74_15160 | Cyanobacteria       | Microcystis wesenbergii Mw_QC_S_20081001_S30            | GTP-binding protein [Microcystis wesenbergii Mw_QC_S_20081001_S30].          | GCA_007096535.1 |
| TRV08313.1 | Ferredoxin-beta→ tRNA→ tRNA→ SAM-methylase→?→  <-?<-SIG+TPM_phosphatase+TM+TM+TM  LRR-repeats+AP-GTPase+COR+TM+TM*→?→  <-?<-?<-?  ?→  <-Pro_CA                                                | LRR-repeats+AP-GTPase+COR+TM+TM   | 751  | EWV41_10615 | Cyanobacteria       | Microcystis wesenbergii Mw_MB_S_20031200_S109           | GTP-binding protein [Microcystis wesenbergii Mw_MB_S_20031200_S109].         | GCA_007096585.1 |
| TRV43292.1 | SAM-methylase→?→  <-?<-SIG+TPM_phosphatase+TM+TM+TM  LRR-repeats+AP-GTPase+COR+TM+TM*→  <-?<-?<-?<-Pro_CA  ?→  <-?<-tRNA<tRNA<-Ferredoxin-beta                                                | LRR-repeats+AP-GTPase+COR+TM+TM   | 874  | EWV87_21500 | Cyanobacteria       | Microcystis panniformis Mp_GB_SS_20050300_S99           | GTP-binding protein [Microcystis panniformis Mp_GB_SS_20050300_S99].         | GCA_007096815.1 |
| TVP67596.1 | LRR-repeats+AP-GTPase+COR+TM+TM*→                                                                                                                                                             | LRR-repeats+AP-GTPase+COR+TM+TM   | 667  | EA343_00435 | Cyanobacteria       | Nodularia sp. (in: Bacteria)                            | GTPase, partial [Nodularia sp. (in: Bacteria)].                              | GCA_007692755.1 |
| TVQ58623.1 | LRR-repeats+AP-GTPase+COR*→  <-Cluster2343_2clades                                                                                                                                            | LRR-repeats+AP-GTPase+COR         | 976  | EA366_06380 | Cyanobacteria       | Spirulina sp. DLM2.Bin59                                | hypothetical protein EA366_06380 [Spirulina sp. DLM2.Bin59].                 | GCA_007693875.1 |
| TVV43679.1 | <-MarR-HTH<-?<-Cluster1077_2clades  Aminotran_1_2→ PSE→  <-?<-?  ?→ LRR-repeats+AP-GTPase+COR*→                                                                                               | LRR-repeats+AP-GTPase+COR         | 985  | FOT50_08370 | Gammaproteobacteria | Thalassolituus sp. C2-1                                 | GTP-binding protein [Thalassolituus sp. C2-1].                               | GCA_007785795.1 |
| TXI24418.1 | LRR-repeats+AP-GTPase+COR+DrHyd*→?→?→?→?→?→ Cluster1726_2clades→                                                                                                                              | LRR-repeats+AP-GTPase+COR+DrHyd   | 1061 | E6Q61_04940 | Betaproteobacteria  | Nitrosomonas sp.                                        | hypothetical protein E6Q61_04940 [Nitrosomonas sp.].                         | GCA_008015595.1 |
| TXL81991.1 | LRR-repeats+AP-GTPase+COR+CASPASE*→                                                                                                                                                           | LRR-repeats+AP-GTPase+COR+CASPASE | 1175 | FHP25_02680 | Alphaproteobacteria | Enhydrobacter sp. CC-CFT640                             | CHAT domain-containing protein [Enhydrobacter sp. CC-CFT640].                | GCA_008039615.1 |
| TYC52188.1 | WCAK→?→ LRR-repeats→ LRR-repeats+AP-GTPase+COR*→                                                                                                                                              | LRR-repeats+AP-GTPase+COR         | 860  | FMN50_19470 | Alphaproteobacteria | Rhodobacteriales bacterium                              | hypothetical protein FMN50_19470 [Rhodobacteriales bacterium].               | GCA_008107755.1 |

| acc            | operon                                                                                                         | architecture                      | len  | gen.name                         | taxend              | species                             | define                                                                       | gca             |
|----------------|----------------------------------------------------------------------------------------------------------------|-----------------------------------|------|----------------------------------|---------------------|-------------------------------------|------------------------------------------------------------------------------|-----------------|
| VFJ48800.1     | RelE-ParE→?→?→ LRR-repeats+AP-GTPase+COR*→                                                                     | LRR-repeats+AP-GTPase+COR         | 467  | BECKDK2373C_GA0170839_GA0170839  | Alphaproteobacteria | Candidatus Kentron sp. DK           | Leucine rich repeat-containing protein, partial [Candidatus Kentron sp. DK]. | -               |
| VFJ57569.1     | RelE-ParE→?→ Cluster54_3clades→?→ LRR-repeats+AP-GTPase+COR*→                                                  | LRR-repeats+AP-GTPase+COR         | 1027 | BECKFW1821A_GA0114235_GA0114235  | Alphaproteobacteria | Candidatus Kentron sp. FW           | Leucine rich repeat-containing protein [Candidatus Kentron sp. FW].          | -               |
| VFJ62833.1     | Cluster1147_2clades→?→?→ RelE-ParE→?→?→ LRR-repeats+AP-GTPase+COR*→ Cluster2123_2clades→                       | LRR-repeats+AP-GTPase+COR         | 702  | BECKDK2373B_GA0170837_GA0170837  | Alphaproteobacteria | Candidatus Kentron sp. DK           | Leucine rich repeat-containing protein [Candidatus Kentron sp. DK].          | -               |
| VFJ65980.1     | Cluster1147_2clades→?→?→ RelE-ParE→?→?→ LRR-repeats+AP-GTPase+COR*→                                            | LRR-repeats+AP-GTPase+COR         | 470  | BECKDK2373C_GA0170839_GA0170839  | Alphaproteobacteria | Candidatus Kentron sp. DK           | Leucine rich repeat-containing protein, partial [Candidatus Kentron sp. DK]. | -               |
| VFJ75018.1     | LRR-repeats+AP-GTPase+COR*→                                                                                    | LRR-repeats+AP-GTPase+COR         | 772  | BECKFW1821C_GA0114237_GA0114237  | Alphaproteobacteria | Candidatus Kentron sp. FW           | Ras of Complex, Roc, domain of DAPkinase [Candidatus Kentron sp. FW].        | -               |
| VFJ87041.1     | RelE-ParE→ LRR-repeats+AP-GTPase+COR*→                                                                         | LRR-repeats+AP-GTPase+COR         | 1091 | BECKLFY1418B_GA0070995_GA0070995 | Alphaproteobacteria | Candidatus Kentron sp. LFY          | Leucine rich repeat-containing protein [Candidatus Kentron sp. LFY].         | -               |
| VFJ90339.1     | RelE-ParE→ LRR-repeats+AP-GTPase+COR*→ COR→                                                                    | LRR-repeats+AP-GTPase+COR         | 380  | BECKLFY1418A_GA0070994_GA0070994 | Alphaproteobacteria | Candidatus Kentron sp. LFY          | Leucine rich repeat-containing protein [Candidatus Kentron sp. LFY].         | -               |
| VFK39292.1     | RelE-ParE→?→ LRR-repeats+AP-GTPase+COR*→?→?→ RPN10→                                                            | LRR-repeats+AP-GTPase+COR         | 1088 | BECKTC1821E_GA0114239_GA0114239  | Alphaproteobacteria | Candidatus Kentron sp. TC           | Leucine rich repeat-containing protein [Candidatus Kentron sp. TC].          | -               |
| VFK43940.1     | Cluster54_3clades→?→ RelE-ParE→ LRR-repeats+AP-GTPase+COR*→?→ Cluster1137_2clades→?→?→ RPN10→                  | LRR-repeats+AP-GTPase+COR         | 1017 | BECKTC1821D_GA0114238_GA0114238  | Alphaproteobacteria | Candidatus Kentron sp. TC           | Leucine rich repeat-containing protein [Candidatus Kentron sp. TC].          | -               |
| VFK55324.1     | RelE-ParE→ LRR-repeats+AP-GTPase+COR*→?→ Cluster1137_2clades→?→?→ RPN10→                                       | LRR-repeats+AP-GTPase+COR         | 1013 | BECKTC1821F_GA0114240_GA0114240  | Alphaproteobacteria | Candidatus Kentron sp. TC           | Leucine rich repeat-containing protein [Candidatus Kentron sp. TC].          | -               |
| VUX45208.1     | LRR-repeats+AP-GTPase+COR+TIR*→                                                                                | LRR-repeats+AP-GTPase+COR+TIR     | 1031 | DF3PA_100056                     | Alphaproteobacteria | Candidatus Defluviococcus seviourii | conserved hypothetical protein [Candidatus Defluviococcus seviourii].        | GCA_900609035.2 |
| VUX54879.1     | <-SIG+Trypsin+PDZ<-?  ?→?→  <-?<-?<-?  LRR-repeats+AP-GTPase+COR*→                                             | LRR-repeats+AP-GTPase+COR         | 935  | JTBB02_V1_20008                  | Gammaproteobacteria | uncultured Woeseiaceae bacterium    | protein of unknown function [uncultured Woeseiaceae bacterium].              | GCA_902167415.1 |
| WP_002686189.1 | <-Cluster1370_2clades  CNMP+CRP-HTH→?→  <-?  LRR-repeats+AP-GTPase+COR+DUF4404*→  <-?<-?<-?  ?→ PurT-ATPgrasp→ | LRR-repeats+AP-GTPase+COR+DUF4404 | 1098 | -                                | Gammaproteobacteria | Beggiatoa alba                      | leucine-rich repeat domain-containing protein [Beggiatoa alba].              | GCF_000245015.1 |
| WP_002693173.1 | <-NUDIX<-?  ?→?→ SIG+TM+TM+Calcineurin→  <-?  LRR-repeats+AP-GTPase+COR*→  <-?  ?→  <-?  Cluster1843_2clades→  | LRR-repeats+AP-GTPase+COR         | 1282 | -                                | Bacteroidetes       | Microscilla marina                  | leucine-rich repeat protein [Microscilla marina].                            | GCF_000169175.1 |
| WP_002693833.1 | LRR-repeats+AP-GTPase+COR+EAD11*→?→  <-PAS+HISKIN                                                              | LRR-repeats+AP-GTPase+COR+EAD11   | 847  | -                                | Bacteroidetes       | Microscilla marina                  | leucine rich repeat protein [Microscilla marina].                            | GCF_000169175.1 |
| WP_002694398.1 | NUDIX→  <-?<-?<-?<-?  LRR-repeats+AP-GTPase+COR*→?→?→?→  <-?<-?<-SIGMA-HTH                                     | LRR-repeats+AP-GTPase+COR         | 836  | -                                | Bacteroidetes       | Microscilla marina                  | leucine-rich repeat domain-containing protein [Microscilla marina].          | GCF_000169175.1 |
| WP_002703871.1 | ABC_membrane+ABC_tran→?→?→ LRR-repeats+AP-GTPase+COR*→?→?→  <-SIG+SecA<-?<-?<-?  SIGMA-HTH→                    | LRR-repeats+AP-GTPase+COR         | 966  | -                                | Bacteroidetes       | Microscilla marina                  | leucine-rich repeat domain-containing protein [Microscilla marina].          | GCF_000169175.1 |
| WP_002704578.1 | <-DAGKIN<-?  ?→ LRR-repeats+AP-GTPase+COR*→  <-?  CNMP+CRP-HTH→  <-?  ?→ InPase→                               | LRR-repeats+AP-GTPase+COR         | 897  | -                                | Bacteroidetes       | Microscilla marina                  | leucine-rich repeat domain-containing protein [Microscilla marina].          | GCF_000169175.1 |



| acc            | operon                                                                                                               | architecture                      | len  | gen.name | taxend              | species                      | define                                                                        | gca             |
|----------------|----------------------------------------------------------------------------------------------------------------------|-----------------------------------|------|----------|---------------------|------------------------------|-------------------------------------------------------------------------------|-----------------|
| WP_008190613.1 | REC→  <-PSE<-HNH<-?  REC→  <-TPR-repeats<-?<-?  LRR-repeats+AP-GTPase+COR+DUF4404*→                                  | LRR-repeats+AP-GTPase+COR+DUF4404 | 948  | -        | Cyanobacteria       | Moorea producens             | leucine-rich repeat domain-containing protein [Moorea producens].             | GCF_000211815.1 |
| WP_008231466.1 | <-Cluster1131_3clades<-?<-Cluster1163_3clades  ?→?→?→ tRNA→ LRR-repeats+AP-GTPase+COR*→                              | LRR-repeats+AP-GTPase+COR         | 970  | -        | Alphaproteobacteria | Roseobacter sp. CCS2         | hypothetical protein [Roseobacter sp. CCS2].                                  | GCF_000169435.1 |
| WP_008273960.1 | Cluster1550_2clades→?→?→ PIN→ LRR-repeats+AP-GTPase+COR*→                                                            | LRR-repeats+AP-GTPase+COR         | 830  | -        | Cyanobacteria       | Crocospaera chwakensis       | leucine-rich repeat domain-containing protein [Crocospaera chwakensis].       | GCF_000169335.1 |
| WP_008277167.1 | <-REC  SIG+TM+TM+TM+TM→  <-?  ?→  <-?  ?→ LRR-repeats+AP-GTPase+COR*→                                                | LRR-repeats+AP-GTPase+COR         | 974  | -        | Cyanobacteria       | Crocospaera chwakensis       | leucine-rich repeat domain-containing protein [Crocospaera chwakensis].       | GCF_000169335.1 |
| WP_008680517.1 | LRR-repeats+AP-GTPase+COR*→                                                                                          | LRR-repeats+AP-GTPase+COR         | 1157 | -        | Planctomycetes      | Rhodopirellula sallentina    | small GTP-binding protein [Rhodopirellula sallentina].                        | GCF_000346505.1 |
| WP_009282559.1 | LRR-repeats+AP-GTPase+COR+TIR*→  <-?<-?  ?→  <-?<-?<-?<-TM+TM+TM+TM+TM                                               | LRR-repeats+AP-GTPase+COR+TIR     | 925  | -        | Bacteroidetes       | Fibrisoma limi               | leucine-rich repeat domain-containing protein [Fibrisoma limi].               | GCF_000296815.2 |
| WP_009283610.1 | <-McrA-NTD  ?→ N-OB→?→?→ LRR-repeats+AP-GTPase+COR+TIR*→ Cluster1088_2clades→?→?→?→  <-SIGMA-HTH                     | LRR-repeats+AP-GTPase+COR+TIR     | 1023 | -        | Bacteroidetes       | Fibrisoma limi               | leucine-rich repeat protein [Fibrisoma limi].                                 | GCF_000296815.2 |
| WP_009627973.1 | LRR-repeats+AP-GTPase+COR+TM+TM*→  <-REC                                                                             | LRR-repeats+AP-GTPase+COR+TM+TM   | 945  | -        | Cyanobacteria       | Pseudanabaena biceps         | leucine-rich repeat domain-containing protein [Pseudanabaena biceps].         | GCF_000332215.1 |
| WP_009964949.1 | <-SMS-KaiC<-?<-?<-Cluster1581_2clades  ?→?→?→ LRR-repeats+AP-GTPase+COR+TIR*→?→ TIR→?→?→ DrHyd+APATPase+TPR+TPR+TPR→ | LRR-repeats+AP-GTPase+COR+TIR     | 961  | -        | Verrucomicrobia     | Verrucomicrobium spinosum    | GTP-binding protein [Verrucomicrobium spinosum].                              | GCF_000172155.1 |
| WP_010471910.1 | <-REC  ?→ LRR-repeats+AP-GTPase+COR*→                                                                                | LRR-repeats+AP-GTPase+COR         | 1082 | -        | Cyanobacteria       | Acaryochloris sp. CCMEE 5410 | leucine-rich repeat domain-containing protein [Acaryochloris sp. CCMEE 5410]. | GCF_000238775.1 |
| WP_010477835.1 | <-ABC_membrane+ABC_tran  ?→?→  <-?<-?  ?→?→ LRR-repeats+AP-GTPase+COR*→                                              | LRR-repeats+AP-GTPase+COR         | 1235 | -        | Cyanobacteria       | Acaryochloris sp. CCMEE 5410 | leucine-rich repeat domain-containing protein [Acaryochloris sp. CCMEE 5410]. | GCF_000238775.1 |
| WP_010933192.1 | <-SIG+TM  LRR-repeats+AP-GTPase+COR*→?→?→?→ ParA-Soj-PloopNTPase→                                                    | LRR-repeats+AP-GTPase+COR         | 1102 | -        | Chlorobi            | Chlorobaculum tepidum        | leucine-rich repeat domain-containing protein [Chlorobaculum tepidum].        | GCF_000006985.1 |
| WP_010994301.1 | <-Cluster5_5clades  LRR-repeats+AP-GTPase+COR+DUF4404*→  <-?<-PSE<-?  ?→  <-REC                                      | LRR-repeats+AP-GTPase+COR+DUF4404 | 1119 | -        | Cyanobacteria       | Nostocaceae                  | MULTISPECIES: leucine-rich repeat domain-containing protein [Nostocaceae].    | GCF_000009705.1 |
| WP_011022280.1 | PAS+HISKIN→  <-?  ?→?→?→?→  <-?  LRR-repeats+AP-GTPase+COR*→                                                         | LRR-repeats+AP-GTPase+COR         | 631  | -        | Euryarchaeota       | Methanosarcina acetivorans   | leucine-rich repeat domain-containing protein [Methanosarcina acetivorans].   | -               |
| WP_011307276.1 | <-HhH-RADC+JAB  ?→ NTP_transf_3→ LRR-repeats+AP-GTPase+COR*→  <-?<-?<-?<-Thioredoxin                                 | LRR-repeats+AP-GTPase+COR         | 863  | -        | Euryarchaeota       | Methanosarcina barkeri       | leucine-rich repeat domain-containing protein [Methanosarcina barkeri].       | GCF_000195895.1 |
| WP_011307410.1 | LRR-repeats+AP-GTPase+COR*→                                                                                          | LRR-repeats+AP-GTPase+COR         | 886  | -        | Euryarchaeota       | Methanosarcina barkeri       | leucine-rich repeat domain-containing protein [Methanosarcina barkeri].       | GCF_000195895.1 |
| WP_011308262.1 | <-Mbetalac<-PSE<-PSE  ?→  <-?  ?→?→?→  <-?  LRR-repeats+AP-GTPase+COR*→  <-?  ?→  <-?  ?→ CHTH→  <-?  ABC-ATPase→    | LRR-repeats+AP-GTPase+COR         | 892  | -        | Euryarchaeota       | Methanosarcina barkeri       | leucine-rich repeat domain-containing protein [Methanosarcina barkeri].       | GCF_000195895.1 |
| WP_011318314.1 | <-Cluster5_5clades  LRR-repeats+AP-GTPase+COR+DUF4404*→  <-?<-ABC-ATPase<-?  ?→  <-REC                               | LRR-repeats+AP-GTPase+COR+DUF4404 | 1107 | -        | Cyanobacteria       | Trichormus variabilis        | leucine-rich repeat domain-containing protein [Trichormus variabilis].        | GCF_000204075.1 |
| WP_011361554.1 | BACTERIALFRINGE+TM+TM→?→ LRR-repeats+AP-GTPase+COR*→  <-?<-DAGKIN<-?  ?→ Cluster881_3clades→?→ Cluster1718_2clades→  | LRR-repeats+AP-GTPase+COR         | 811  | -        | Chlorobi            | Chlorobium chlorochromatii   | Rab family protein [Chlorobium chlorochromatii].                              | -               |

| acc            | operon                                                                                                                                                 | architecture                            | len  | gen.name | taxend              | species                     | define                                                                       | gca             |
|----------------|--------------------------------------------------------------------------------------------------------------------------------------------------------|-----------------------------------------|------|----------|---------------------|-----------------------------|------------------------------------------------------------------------------|-----------------|
| WP_011388592.1 | <-ABC_membrane+ABC_tran<-ABC_membrane+ABC_tran<-?<-?<-?  ?→ LRR-repeats+AP-GTPase+COR+TIR*→ TM+TM+TM→                                                  | LRR-repeats+AP-GTPase+COR+TIR           | 1085 | -        | Alphaproteobacteria | Rhodospirillum rubrum       | leucine-rich repeat domain-containing protein [Rhodospirillum rubrum].       | GCF_000013085.1 |
| WP_011613173.1 | <-Cluster1413_2clades<-?  TPR-repeats→  <-?<-?<-PSE  LRR-repeats+AP-GTPase+COR*→                                                                       | LRR-repeats+AP-GTPase+COR               | 1041 | -        | Cyanobacteria       | Trichodesmium erythraeum    | leucine-rich repeat domain-containing protein [Trichodesmium erythraeum].    | GCF_000014265.1 |
| WP_011712156.1 | OmpA→?→  <-?<-?<-?  LRR-repeats+AP-GTPase+COR*→                                                                                                        | LRR-repeats+AP-GTPase+COR               | 761  | -        | Alphaproteobacteria | Magnetococcus marinus       | small GTP-binding protein [Magnetococcus marinus].                           | GCF_000014865.1 |
| WP_012162488.1 | CNMP+CRP-HTH→  <-?<-Cluster997_2clades<-?<-Thioredoxin<-SIG+RHOD-CDC25<-ARSR-HTH Cluster1052_2clades→ NUDIX→ LRR-repeats+AP-GTPase+COR+TIR*→ TM+TM+TM→ | LRR-repeats+AP-GTPase+COR+TIR           | 842  | -        | Cyanobacteria       | Acaryochloris marina        | leucine-rich repeat domain-containing protein [Acaryochloris marina].        | GCF_000018105.1 |
| WP_012407958.1 | SIG+PBPB→ HISKIN→ HISKIN→ LRR-repeats+AP-GTPase+COR+TIR*→  <-?  ?→?→?→  <-?  ?→ Pentapeptide-repeats→                                                  | LRR-repeats+AP-GTPase+COR+TIR           | 1185 | -        | Cyanobacteria       | Nostoc punctiforme          | leucine-rich repeat domain-containing protein [Nostoc punctiforme].          | GCF_000020025.1 |
| WP_012412722.1 | LRR-repeats+AP-GTPase+COR*→                                                                                                                            | LRR-repeats+AP-GTPase+COR               | 1124 | -        | Cyanobacteria       | Nostoc punctiforme          | leucine-rich repeat domain-containing protein [Nostoc punctiforme].          | GCF_000020025.1 |
| WP_012466409.1 | <-SF2-DUF3427A+TnsA-REase<-?<-?<-?<-?  ?→?→ LRR-repeats+AP-GTPase+COR+TIR*→ TIR→                                                                       | LRR-repeats+AP-GTPase+COR+TIR           | 998  | -        | Chlorobi            | Chlorobium limicola         | leucine-rich repeat domain-containing protein [Chlorobium limicola].         | GCF_000020465.1 |
| WP_012597192.1 | Cluster1134_2clades→ REase-4→?→?→?→ HAD→ LRR-repeats+AP-GTPase+COR+TM+TM*→                                                                             | LRR-repeats+AP-GTPase+COR+TM+TM         | 937  | -        | Cyanobacteria       | Rippkaea orientalis         | GTP-binding protein [Rippkaea orientalis].                                   | GCF_000021805.1 |
| WP_013320928.1 | Cluster5_5clades→ LRR-repeats+AP-GTPase+COR*→?→ SIG+GT4→  <-?<-?  Cluster5_5clades→                                                                    | LRR-repeats+AP-GTPase+COR               | 876  | -        | Cyanobacteria       | Gloeotheca verrucosa        | leucine-rich repeat domain-containing protein [Gloeotheca verrucosa].        | GCF_000147335.1 |
| WP_013323827.1 | LRR-repeats+AP-GTPase+COR+TM+TM*→                                                                                                                      | LRR-repeats+AP-GTPase+COR+TM+TM         | 857  | -        | Cyanobacteria       | Gloeotheca verrucosa        | leucine-rich repeat domain-containing protein [Gloeotheca verrucosa].        | GCF_000147335.1 |
| WP_013762559.1 | SIGMA-HTH→?→ SIG+TM→ LRR-repeats+AP-GTPase+COR+TIR*→?→ SIGMA-HTH→?→  <-SIG+TM+TM+TM+HISKIN                                                             | LRR-repeats+AP-GTPase+COR+TIR           | 995  | -        | Bacteroidetes       | Haliscomenobacter hydrossis | leucine-rich repeat domain-containing protein [Haliscomenobacter hydrossis]. | GCF_000212735.1 |
| WP_013763674.1 | <-ABC_membrane+ABC_tran  FGS→ PSE→ FGS→ LRR-repeats+AP-GTPase+COR+EAD11+CASPASE*→ RNASEII→                                                             | LRR-repeats+AP-GTPase+COR+EAD11+CASPASE | 1108 | -        | Bacteroidetes       | Haliscomenobacter hydrossis | leucine-rich repeat domain-containing protein [Haliscomenobacter hydrossis]. | GCF_000212735.1 |
| WP_013766755.1 | LRR-repeats+AP-GTPase+COR+EAD11*→                                                                                                                      | LRR-repeats+AP-GTPase+COR+EAD11         | 1448 | -        | Bacteroidetes       | Haliscomenobacter hydrossis | leucine-rich repeat protein [Haliscomenobacter hydrossis].                   | GCF_000212735.1 |
| WP_013767289.1 | <-SIG+ABhydrolase  SIG+7TMR-DISMED1→ FGS→ FGS→ LRR-repeats+AP-GTPase+COR+EAD11*→  <-?<-Cluster1645_2clades                                             | LRR-repeats+AP-GTPase+COR+EAD11         | 840  | -        | Bacteroidetes       | Haliscomenobacter hydrossis | leucine-rich repeat protein [Haliscomenobacter hydrossis].                   | GCF_000212735.1 |
| WP_013768874.1 | LRR-repeats+AP-GTPase+COR+TIR→ LRR-repeats+AP-GTPase+COR→ LRR-repeats+AP-GTPase+COR*→?→?→?→  <-?  ?→?→  <-REC                                          | LRR-repeats+AP-GTPase+COR               | 741  | -        | Bacteroidetes       | Haliscomenobacter hydrossis | hypothetical protein [Haliscomenobacter hydrossis].                          | GCF_000212735.1 |
| WP_013768875.1 | LRR-repeats+AP-GTPase+COR*→                                                                                                                            | LRR-repeats+AP-GTPase+COR               | 786  | -        | Bacteroidetes       | Haliscomenobacter hydrossis | hypothetical protein [Haliscomenobacter hydrossis].                          | GCF_000212735.1 |
| WP_013818452.1 | LRR-repeats+AP-GTPase+COR+TIR*→                                                                                                                        | LRR-repeats+AP-GTPase+COR+TIR           | 944  | -        | Gammaproteobacteria | Methylomonas methanica      | leucine-rich repeat domain-containing protein [Methylomonas methanica].      | GCF_000214665.1 |
| WP_014444162.1 | REC→  <-?<-?  ?→  <-?<-?<-?  LRR-repeats+AP-GTPase+COR*→  <-?<-7TMR-DISMED1                                                                            | LRR-repeats+AP-GTPase+COR               | 979  | -        | Actinobacteria      | Actinoplanes missouriensis  | hypothetical protein [Actinoplanes missouriensis].                           | GCF_000284295.1 |
| WP_014798951.1 | LRR-repeats+AP-GTPase+COR*→  <-?<-?<-Pkinase+TM+TPR+TPR                                                                                                | LRR-repeats+AP-GTPase+COR               | 1071 | -        | Bacteroidetes       | Bernardetia litoralis       | leucine-rich repeat domain-containing protein [Bernardetia litoralis].       | GCF_000265505.1 |

| acc            | operon                                                                                                                                                  | architecture                       | len  | gen.name | taxend              | species                            | define                                                                              | gca             |
|----------------|---------------------------------------------------------------------------------------------------------------------------------------------------------|------------------------------------|------|----------|---------------------|------------------------------------|-------------------------------------------------------------------------------------|-----------------|
| WP_015112282.1 | <-ParA-Soj-PloopNTPase<-?  ?→ PIN→ LRR-repeats+AP-GTPase+COR+DUF4404*→  <-?<-?  ?→?→  <-?<-?  Thioredoxin→                                              | LRR-repeats+AP-GTPase+COR+DUF4404  | 925  | -        | Cyanobacteria       | Nostoc sp. PCC 7107                | leucine-rich repeat domain-containing protein [Nostoc sp. PCC 7107].                | GCF_000316625.1 |
| WP_015118030.1 | LRR-repeats+AP-GTPase+COR+EAD1*→  <-IG                                                                                                                  | LRR-repeats+AP-GTPase+COR+EAD1     | 955  | -        | Cyanobacteria       | Rivularia sp. PCC 7116             | leucine-rich repeat domain-containing protein [Rivularia sp. PCC 7116].             | GCF_000316665.1 |
| WP_015120500.1 | LRR-repeats+AP-GTPase+COR+EAD1*→?→?→?→?→?→ ABC_membrane+ABC_tran→                                                                                       | LRR-repeats+AP-GTPase+COR+EAD1     | 868  | -        | Cyanobacteria       | Rivularia sp. PCC 7116             | leucine-rich repeat domain-containing protein [Rivularia sp. PCC 7116].             | GCF_000316665.1 |
| WP_015120705.1 | <-Cluster1048_2clades<-?  ?→  <-?  LRR-repeats+AP-GTPase+COR+EAD1*→  <-?<-?  ?→  <-PSE<-?  ABC-ATPase→                                                  | LRR-repeats+AP-GTPase+COR+EAD1     | 989  | -        | Cyanobacteria       | Rivularia sp. PCC 7116             | leucine-rich repeat domain-containing protein [Rivularia sp. PCC 7116].             | GCF_000316665.1 |
| WP_015132911.1 | REase→ LRR-repeats+AP-GTPase+COR+DUF4404*→                                                                                                              | LRR-repeats+AP-GTPase+COR+DUF4404  | 1183 | -        | Cyanobacteria       | Leptolyngbya sp. PCC 7376          | leucine-rich repeat protein [Leptolyngbya sp. PCC 7376].                            | GCF_000316605.1 |
| WP_015135895.1 | <-Cluster998_2clades  ?→?→  <-?  WCAK→  <-?<-?  LRR-repeats+AP-GTPase+COR+TM+TM*→ ABC-ATPase→ ABC_membrane+ABC_tran→  <-?<-?<-?  ISOFLAVOMETHYLASE-HTH→ | LRR-repeats+AP-GTPase+COR+TM+TM    | 925  | -        | Cyanobacteria       | Leptolyngbya sp. PCC 7376          | leucine-rich repeat domain-containing protein [Leptolyngbya sp. PCC 7376].          | GCF_000316605.1 |
| WP_015147146.1 | Pentapeptide-repeats→?→ CBS→ Pentapeptide-repeats→ Pentapeptide-repeats→?→ LRR-repeats+AP-GTPase+COR*→?→?→ Cluster2236_2clades→  <-?<-?<-Hsp10          | LRR-repeats+AP-GTPase+COR          | 922  | -        | Cyanobacteria       | Oscillatoria acuminata             | leucine-rich repeat domain-containing protein [Oscillatoria acuminata].             | GCF_000317105.1 |
| WP_015161253.1 | TM→?→  <-?  SF2-DUF3427A→  <-?  LRR-repeats+AP-GTPase+COR*→  <-?  ?→?→ TRD+TRD→?→ PIN→                                                                  | LRR-repeats+AP-GTPase+COR          | 993  | -        | Cyanobacteria       | Chamaesiphon minutus               | leucine-rich repeat domain-containing protein [Chamaesiphon minutus].               | GCF_000317145.1 |
| WP_015196406.1 | HTH→?→  <-?  LRR-repeats+AP-GTPase+COR+DUF4404*→                                                                                                        | LRR-repeats+AP-GTPase+COR+DUF4404  | 1034 | -        | Cyanobacteria       | Calothrix parietina                | leucine-rich repeat domain-containing protein [Calothrix parietina].                | GCF_000317435.1 |
| WP_015197432.1 | <-Cluster5_5clades<-?<-Cluster5_5clades<-Chelatase-AAA+VWA<-?<-?<-?  LRR-repeats+AP-GTPase+COR+DUF4404*→?→?→ RNASEII→                                   | LRR-repeats+AP-GTPase+COR+DUF4404  | 1408 | -        | Cyanobacteria       | Calothrix parietina                | leucine-rich repeat domain-containing protein [Calothrix parietina].                | GCF_000317435.1 |
| WP_015203756.1 | LRR-repeats+AP-GTPase+COR*→  <-?<-?  TM+TM+TM+TM+TM+TM+TM+TM+TM+TM→                                                                                     | LRR-repeats+AP-GTPase+COR          | 1011 | -        | Cyanobacteria       | Crinalium epipsammum               | leucine-rich repeat domain-containing protein [Crinalium epipsammum].               | GCF_000317495.1 |
| WP_015206852.1 | <-HNH<-?  LRR-repeats+AP-GTPase+COR*→  <-CASPASE+TPR                                                                                                    | LRR-repeats+AP-GTPase+COR          | 938  | -        | Cyanobacteria       | Cylindrospermum stagnale           | leucine-rich repeat protein [Cylindrospermum stagnale].                             | GCF_000317535.1 |
| WP_015280068.1 | <-CENPB  LRR-repeats+AP-GTPase+COR+TIR*→  <-?<-?  MoxR-AAA→ VWA→?→ SIG+TM+VWA+TM→ SIG+TM+VWA+TM→                                                        | LRR-repeats+AP-GTPase+COR+TIR      | 1283 | -        | Gammaproteobacteria | Thioflavicoccus mobilis            | leucine-rich repeat domain-containing protein [Thioflavicoccus mobilis].            | GCF_000327045.1 |
| WP_015361283.1 | Cluster2083_2clades→?→?→?→?→  <-?  ?→ LRR-repeats+AP-GTPase+COR+TIR*→                                                                                   | LRR-repeats+AP-GTPase+COR+TIR      | 1060 | -        | Bacteroidetes       | Nonlabens dokdonensis              | leucine-rich repeat domain-containing protein [Nonlabens dokdonensis].              | GCF_000332115.1 |
| WP_015785030.1 | REase-4→?→?→?→ HAD→ LRR-repeats+AP-GTPase+COR+TM+TM*→                                                                                                   | LRR-repeats+AP-GTPase+COR+TM+TM    | 937  | -        | Cyanobacteria       | Rippkaea orientalis                | GTP-binding protein [Rippkaea orientalis].                                          | GCF_000024045.1 |
| WP_015948508.1 | <-Arginase<-?  ?→?→ LRR-repeats→ LRR-repeats+AP-GTPase+COR+ARSR-HTH*→  <-?<-?<-Nitroreductase-like<-PEP-utilisers-C                                     | LRR-repeats+AP-GTPase+COR+ARSR-HTH | 792  | -        | Deltaproteobacteria | Desulfatibacillum aliphaticivorans | leucine-rich repeat domain-containing protein [Desulfatibacillum aliphaticivorans]. | GCF_000021905.1 |
| WP_015955249.1 | LRR-repeats+AP-GTPase+COR*→  <-DAGKIN<-?<-?  SIG+GT4→                                                                                                   | LRR-repeats+AP-GTPase+COR          | 867  | -        | Cyanobacteria       | Gloeothece citrifomis              | leucine-rich repeat domain-containing protein [Gloeothece citrifomis].              | GCF_000021825.1 |
| WP_015956848.1 | REC+LuxR-HTH→  <-tRNA<-?<-?<-?  PolB→ Cluster2355_2clades→ LRR-repeats+AP-GTPase+COR+TIR*→                                                              | LRR-repeats+AP-GTPase+COR+TIR      | 1015 | -        | Cyanobacteria       | Gloeothece citrifomis              | leucine-rich repeat domain-containing protein [Gloeothece citrifomis].              | GCF_000021825.1 |





| acc            | operon                                                                                                                    | architecture                  | len  | gen.name | taxend              | species                          | define                                                                                    | gca             |
|----------------|---------------------------------------------------------------------------------------------------------------------------|-------------------------------|------|----------|---------------------|----------------------------------|-------------------------------------------------------------------------------------------|-----------------|
| WP_022571049.1 | CI→ LRR-repeats+AP-GTPase+COR*→                                                                                           | LRR-repeats+AP-GTPase+COR     | 1095 | -        | Gammaproteobacteria | Vibrio cyclitrophicus            | leucine rich repeat protein [Vibrio cyclitrophicus].                                      | GCF_000473545.1 |
| WP_022589047.1 | ABC-ATPase→?→?→  <-Acylphosphatase  ?→?→  <-?  LRR-repeats+AP-GTPase+COR+TIR*→                                            | LRR-repeats+AP-GTPase+COR+TIR | 1264 | -        | Gammaproteobacteria | Vibrio nigripulchritudo          | TIR domain-containing protein [Vibrio nigripulchritudo].                                  | GCF_900067775.1 |
| WP_023074611.1 | LRR-repeats+AP-GTPase+COR+TIR*→  <-?  ?→  <-?  Cluster1646_2clades→                                                       | LRR-repeats+AP-GTPase+COR+TIR | 777  | -        | Cyanobacteria       | Leptolyngbya sp. Heron Island J  | leucine-rich repeat domain-containing protein, partial [Leptolyngbya sp. Heron Island J]. | GCF_000482245.1 |
| WP_023076066.1 | Cluster53_2clades→  <-RelE-ParE<-?  LRR-repeats+AP-GTPase+COR+TIR*→  <-?  ?→  <-?  ?→?→  <-?<-SIG+TM+TM+TM+TM+TM+TM       | LRR-repeats+AP-GTPase+COR+TIR | 1129 | -        | Cyanobacteria       | Leptolyngbya sp. Heron Island J  | leucine-rich repeat domain-containing protein [Leptolyngbya sp. Heron Island J].          | GCF_000482245.1 |
| WP_023571556.1 | LRR-repeats+AP-GTPase+COR+TIR*→                                                                                           | LRR-repeats+AP-GTPase+COR+TIR | 1142 | -        | Bacteroidetes       | Flavobacterium cauense           | TIR domain-containing protein [Flavobacterium cauense].                                   | GCF_000498475.1 |
| WP_024594403.1 | LRR-repeats+AP-GTPase+COR*→                                                                                               | LRR-repeats+AP-GTPase+COR     | 982  | -        | Gammaproteobacteria | Pseudoalteromonas sp. TB13       | GTP-binding protein [Pseudoalteromonas sp. TB13].                                         | GCF_000497915.1 |
| WP_025517521.1 | CI→ LRR-repeats+AP-GTPase+COR*→                                                                                           | LRR-repeats+AP-GTPase+COR     | 1105 | -        | Gammaproteobacteria | Vibrio parahaemolyticus          | 50S ribosome-binding GTPase [Vibrio parahaemolyticus].                                    | GCF_000489555.1 |
| WP_025605295.1 | CI→?→ PSE→ LRR-repeats+AP-GTPase+COR+TIR*→                                                                                | LRR-repeats+AP-GTPase+COR+TIR | 1265 | -        | Gammaproteobacteria | Vibrio parahaemolyticus          | TIR domain-containing protein [Vibrio parahaemolyticus].                                  | GCF_000489075.1 |
| WP_026726296.1 | LRR-repeats+AP-GTPase+COR*→                                                                                               | LRR-repeats+AP-GTPase+COR     | 698  | -        | Bacteroidetes       | Flavobacterium sasangense        | GTP-binding protein [Flavobacterium sasangense].                                          | GCF_000686885.1 |
| WP_028083535.1 | LRR-repeats+AP-GTPase+COR*→                                                                                               | LRR-repeats+AP-GTPase+COR     | 993  | -        | Cyanobacteria       | Dolichospermum circinale         | leucine-rich repeat domain-containing protein [Dolichospermum circinale].                 | GCF_000426925.1 |
| WP_028469928.1 | LRR-repeats+AP-GTPase+COR*→?→?→ GTPase-AIG→                                                                               | LRR-repeats+AP-GTPase+COR     | 697  | -        | Gammaproteobacteria | Neptunomonas japonica            | hypothetical protein [Neptunomonas japonica].                                             | GCF_000422765.1 |
| WP_028667519.1 | <-Cluster1063_3clades<-Cluster1067_3clades  ?→?→?→ LRR-repeats+AP-GTPase+COR*→                                            | LRR-repeats+AP-GTPase+COR     | 798  | -        | Bacteroidetes       | Runella zeae                     | GTP-binding protein [Runella zeae].                                                       | GCF_000423565.1 |
| WP_029631472.1 | LRR-repeats+AP-GTPase+COR*→                                                                                               | LRR-repeats+AP-GTPase+COR     | 1051 | -        | Planctomycetes      | Zavarzinella formosa             | leucine-rich repeat domain-containing protein [Zavarzinella formosa].                     | GCF_000255705.1 |
| WP_030435343.1 | REC→ PSE→?→?→  <-?  ?→ Cluster2103_2clades→  <-?  LRR-repeats+AP-GTPase+COR*→ AP-GTPase+COR+TM+TM→  <-REC<-?  ABC-ATPase→ | LRR-repeats+AP-GTPase+COR     | 551  | -        | Actinobacteria      | Actinoplanes subtropicus         | GTP-binding protein [Actinoplanes subtropicus].                                           | GCF_000721705.1 |
| WP_030488330.1 | LRR-repeats+AP-GTPase+COR*→  <-?<-?  ?→?→  <-?  SIG+TM→ REC→                                                              | LRR-repeats+AP-GTPase+COR     | 1088 | -        | Actinobacteria      | Micromonospora chokoriensis      | hypothetical protein [Micromonospora chokoriensis].                                       | GCF_000718555.1 |
| WP_031429699.1 | CI→?→ PSE→ LRR-repeats+AP-GTPase+COR+TIR*→                                                                                | LRR-repeats+AP-GTPase+COR+TIR | 1261 | -        | Gammaproteobacteria | Vibrio parahaemolyticus          | TIR domain-containing protein [Vibrio parahaemolyticus].                                  | GCF_000736345.1 |
| WP_034058880.1 | S1COLD→?→  <-?  ?→?→  <-?  ?→ LRR-repeats+AP-GTPase+COR*→                                                                 | LRR-repeats+AP-GTPase+COR     | 924  | -        | Bacteroidetes       | Lacinutrix jangbogonensis        | leucine-rich repeat domain-containing protein [Lacinutrix jangbogonensis].                | GCF_000797445.1 |
| WP_035121352.1 | LRR-repeats+AP-GTPase+COR+TIR*→  <-?<-?<-?<-ABC-ATPase                                                                    | LRR-repeats+AP-GTPase+COR+TIR | 1115 | -        | Cyanobacteria       | Fischerella sp. PCC 9431         | leucine-rich repeat domain-containing protein [Fischerella sp. PCC 9431].                 | GCF_000447295.1 |
| WP_035197779.1 | LRR-repeats+AP-GTPase+COR*→                                                                                               | LRR-repeats+AP-GTPase+COR     | 914  | -        | Firmicutes          | Calidifontibacillus azotoformans | GTP-binding protein [Calidifontibacillus azotoformans].                                   | GCF_000708505.1 |
| WP_035613546.1 | LRR-repeats+AP-GTPase+COR*→                                                                                               | LRR-repeats+AP-GTPase+COR     | 1058 | -        | Verrucomicrobia     | Haloferula sp. BvORR071          | hypothetical protein [Haloferula sp. BvORR071].                                           | -               |
| WP_035758421.1 | LRR-repeats+AP-GTPase+COR*→                                                                                               | LRR-repeats+AP-GTPase+COR     | 956  | -        | Bacteroidetes       | Hugenholtzia roseola             | leucine-rich repeat protein, partial [Hugenholtzia roseola].                              | GCF_000422585.1 |
| WP_038164534.1 | LRR-repeats+AP-GTPase+COR+TIR*→                                                                                           | LRR-repeats+AP-GTPase+COR+TIR | 793  | -        | Verrucomicrobia     | Verrucomicrobium sp. BvORR106    | TIR domain-containing protein [Verrucomicrobium sp. BvORR106].                            | -               |
| WP_039108669.1 | <-Cluster1070_2clades<-ENDO3+NUDIX  HU-IHF→?→ LRR-repeats+AP-GTPase+COR*→                                                 | LRR-repeats+AP-GTPase+COR     | 912  | -        | Bacteroidetes       | Flavobacterium sp. AED           | leucine-rich repeat domain-containing protein [Flavobacterium sp. AED].                   | GCF_000812945.1 |



| acc            | operon                                                                                                                                 | architecture                    | len  | gen.name | taxend              | species                         | define                                                                           | gca             |
|----------------|----------------------------------------------------------------------------------------------------------------------------------------|---------------------------------|------|----------|---------------------|---------------------------------|----------------------------------------------------------------------------------|-----------------|
| WP_050710728.1 | LRR-repeats+AP-GTPase+COR+DrHyd*→                                                                                                      | LRR-repeats+AP-GTPase+COR+DrHyd | 1196 | -        | Bacteroidetes       | Dysgonomonas sp. HGC4           | leucine-rich repeat domain-containing protein [Dysgonomonas sp. HGC4].           | GCF_001261715.1 |
| WP_050857550.1 | LRR-repeats+AP-GTPase+COR*→  <-?<-?<-ABC-ATPase                                                                                        | LRR-repeats+AP-GTPase+COR       | 958  | -        | Cyanobacteria       | Acaryochloris sp. CCMEE 5410    | leucine-rich repeat domain-containing protein [Acaryochloris sp. CCMEE 5410].    | GCF_000238775.1 |
| WP_051210834.1 | SIGMA-HTH→?→?→ LRR-repeats+AP-GTPase+COR*→  <-?<-?<-?<-SIGMA-HTH                                                                       | LRR-repeats+AP-GTPase+COR       | 1280 | -        | Bacteroidetes       | Runella zeae                    | leucine-rich repeat domain-containing protein [Runella zeae].                    | GCF_000423565.1 |
| WP_051242709.1 | LRR-repeats+AP-GTPase+COR+TIR*→                                                                                                        | LRR-repeats+AP-GTPase+COR+TIR   | 1043 | -        | Alphaproteobacteria | Stappia stellulata              | leucine-rich repeat domain-containing protein [Stappia stellulata].              | GCF_000423705.1 |
| WP_051289443.1 | LRR-repeats+AP-GTPase+COR+TM+TM*→  <-PSE  ?→?→  <-?<-?  ?→  <-?<-ABC-ATPase                                                            | LRR-repeats+AP-GTPase+COR+TM+TM | 821  | -        | Cyanobacteria       | Dolichospermum circinale        | leucine-rich repeat domain-containing protein [Dolichospermum circinale].        | GCF_000426925.1 |
| WP_051347554.1 | LRR-repeats+AP-GTPase+COR*→                                                                                                            | LRR-repeats+AP-GTPase+COR       | 814  | -        | Cyanobacteria       | Dolichospermum circinale        | hypothetical protein, partial [Dolichospermum circinale].                        | GCF_000426905.1 |
| WP_051394619.1 | LRR-repeats+AP-GTPase+COR+TM+TM*→                                                                                                      | LRR-repeats+AP-GTPase+COR+TM+TM | 1004 | -        | Cyanobacteria       | Leptolyngbya sp. Heron Island J | GTP-binding protein [Leptolyngbya sp. Heron Island J].                           | GCF_000482245.1 |
| WP_051793473.1 | LRR-repeats+AP-GTPase+COR*→                                                                                                            | LRR-repeats+AP-GTPase+COR       | 946  | -        | Actinobacteria      | Kibdelosporangium aridum        | leucine-rich repeat domain-containing protein [Kibdelosporangium aridum].        | GCF_003947235.1 |
| WP_051898832.1 | InPase→  <-?  LRR-repeats+AP-GTPase+COR*→                                                                                              | LRR-repeats+AP-GTPase+COR       | 833  | -        | Actinobacteria      | Sciscionella sp. SE31           | hypothetical protein [Sciscionella sp. SE31].                                    | GCF_000737195.2 |
| WP_051926645.1 | LRR-repeats+AP-GTPase+COR*→  <-?  ?→  <-?<-SIGMA-HTH<-?<-SIGMA-HTH                                                                     | LRR-repeats+AP-GTPase+COR       | 996  | -        | Actinobacteria      | Streptomyces durhamensis        | hypothetical protein [Streptomyces durhamensis].                                 | GCF_000725475.1 |
| WP_051937621.1 | LRR-repeats+AP-GTPase+COR*→                                                                                                            | LRR-repeats+AP-GTPase+COR       | 1086 | -        | Actinobacteria      | Streptomyces scabiei            | hypothetical protein [Streptomyces scabiei].                                     | GCF_000738715.1 |
| WP_051942852.1 | LRR-repeats+AP-GTPase+COR*→  <-?<-?<-Cluster1515_2clades<-?<-ABC-ATPase<-?<-SIG+TM+TM+TM+TM+TM+TM+TM                                   | LRR-repeats+AP-GTPase+COR       | 1022 | -        | Actinobacteria      | Streptacidiphilus rugosus       | hypothetical protein [Streptacidiphilus rugosus].                                | GCF_000744655.1 |
| WP_052150025.1 | LRR-repeats+AP-GTPase+COR*→?→?→  <-?  ?→?→?→  <-Pentapeptide                                                                           | LRR-repeats+AP-GTPase+COR       | 949  | -        | Cyanobacteria       | Aphanizomenon flos-aquae        | leucine-rich repeat domain-containing protein [Aphanizomenon flos-aquae].        | GCF_000789435.1 |
| WP_052277881.1 | SIG+TM+TM+TM+TM+TM+TM+TM+TM→  <-?  Mbetalac→<br>SAM-methylase→?→  <-?<-SIG+TPM_phosphatase+TM+TM+TM  LRR-repeats+AP-GTPase+COR+TM+TM*→ | LRR-repeats+AP-GTPase+COR+TM+TM | 921  | -        | Cyanobacteria       | Microcystis panniformis         | leucine-rich repeat domain-containing protein [Microcystis panniformis].         | -               |
| WP_052288305.1 | <-Hsp10  ?→ REC→ Ferretin→  <-Cluster1950_2clades  ?→ LRR-repeats+AP-GTPase+COR+TIR*→  <-?<-?  ?→?→?→?→<br>SIG+TM+TM+TM+TM+TM+TM→      | LRR-repeats+AP-GTPase+COR+TIR   | 848  | -        | Terrabacteria group | Cyanobacteria                   | MULTISPECIES: TIR domain-containing protein [Cyanobacteria].                     | GCF_000817775.2 |
| WP_052324486.1 | LRR-repeats→ AP-GTPase+COR*→                                                                                                           | AP-GTPase+COR                   | 434  | -        | Bacteroidetes       | Haliscomenobacter hydrossis     | 50S ribosome-binding GTPase [Haliscomenobacter hydrossis].                       | GCF_000212735.1 |
| WP_052478236.1 | LRR-repeats+AP-GTPase+COR*→  <-?  ?→  <-?<-?<-Aminotran_1_2                                                                            | LRR-repeats+AP-GTPase+COR       | 942  | -        | Actinobacteria      | Kibdelosporangium sp. MJ126-NF4 | leucine-rich repeat domain-containing protein [Kibdelosporangium sp. MJ126-NF4]. | GCF_000826545.1 |
| WP_052712873.1 | <-HhH-RADC+JAB  ?→ NTP_transf_3→ LRR-repeats+AP-GTPase+COR*→  <-?<-?  ?→  <-?<-?  SIR2→                                                | LRR-repeats+AP-GTPase+COR       | 926  | -        | Euryarchaeota       | Methanosarcina barkeri          | leucine-rich repeat domain-containing protein [Methanosarcina barkeri].          | GCF_001027005.1 |
| WP_052718309.1 | <-HhH-RADC+JAB  ?→ NTP_transf_3→ LRR-repeats+AP-GTPase+COR→?→ LRR-repeats+AP-GTPase+COR→                                               | LRR-repeats+AP-GTPase+COR       | 871  | -        | Euryarchaeota       | Methanosarcina sp. MTP4         | leucine-rich repeat domain-containing protein [Methanosarcina sp. MTP4].         | GCF_000970045.1 |

| acc            | operon                                                                                                                 | architecture                  | len  | gen.name | taxend              | species                      | define                                                                        | gca             |
|----------------|------------------------------------------------------------------------------------------------------------------------|-------------------------------|------|----------|---------------------|------------------------------|-------------------------------------------------------------------------------|-----------------|
| WP_052718311.1 | LRR-repeats+AP-GTPase+COR*→                                                                                            | LRR-repeats+AP-GTPase+COR     | 999  | -        | Euryarchaeota       | Methanosarcina sp. MTP4      | leucine-rich repeat domain-containing protein [Methanosarcina sp. MTP4].      | GCF_000970045.1 |
| WP_052718346.1 | LRR-repeats+AP-GTPase+COR*→?→  <-?<-SIG+TM+TM+TM+TM+TM<-ABC-ATPase                                                     | LRR-repeats+AP-GTPase+COR     | 891  | -        | Euryarchaeota       | Methanosarcina sp. MTP4      | leucine-rich repeat domain-containing protein [Methanosarcina sp. MTP4].      | GCF_000970045.1 |
| WP_052721594.1 | <-HhH-RADC+JAB  ?→ NTP_transf_3→ LRR-repeats+AP-GTPase+COR*→                                                           | LRR-repeats+AP-GTPase+COR     | 890  | -        | Euryarchaeota       | Methanosarcina siciliae      | leucine-rich repeat domain-containing protein [Methanosarcina siciliae].      | GCF_000970085.1 |
| WP_052725465.1 | <-HhH-RADC+JAB  ?→ NTP_transf_3→ LRR-repeats+AP-GTPase+COR*→                                                           | LRR-repeats+AP-GTPase+COR     | 886  | -        | Euryarchaeota       | Methanosarcina sp. Kolksee   | leucine-rich repeat domain-containing protein [Methanosarcina sp. Kolksee].   | GCF_000969945.1 |
| WP_052725699.1 | <-HhH-RADC+JAB  ?→ NTP_transf_3→ LRR-repeats+AP-GTPase+COR*→  <-?<-?  ?→  <-?<-?  SIR2→                                | LRR-repeats+AP-GTPase+COR     | 926  | -        | Euryarchaeota       | Methanosarcina barkeri       | leucine-rich repeat domain-containing protein [Methanosarcina barkeri].       | GCF_000970065.1 |
| WP_052725704.1 | <-SIG+TPR+TPR+TPR+TPR+TPR+TPR  ?→  <-?  ?→?→ PSE→?→ LRR-repeats+AP-GTPase+COR*→?→?→ PRTase→                            | LRR-repeats+AP-GTPase+COR     | 886  | -        | Euryarchaeota       | Methanosarcina barkeri       | leucine-rich repeat domain-containing protein [Methanosarcina barkeri].       | GCF_000970065.1 |
| WP_052727304.1 | PAS+HISKIN→  <-?  ?→?→?→?→  <-PSE  LRR-repeats+AP-GTPase+COR*→  <-?  ?→ PSE→  <-?  Cluster1640_2clades→  <-SIG+HIN-HTH | LRR-repeats+AP-GTPase+COR     | 1010 | -        | Euryarchaeota       | Methanosarcina siciliae      | leucine-rich repeat domain-containing protein [Methanosarcina siciliae].      | GCF_000970145.1 |
| WP_052727948.1 | LRR-repeats+AP-GTPase+COR+TIR*→?→?→?→?→?→ PSE→  <-TPR-repeats                                                          | LRR-repeats+AP-GTPase+COR+TIR | 877  | -        | Euryarchaeota       | Methanosarcina vacuolata     | leucine-rich repeat domain-containing protein [Methanosarcina vacuolata].     | GCF_000969905.1 |
| WP_052727973.1 | <-HhH-RADC+JAB  ?→ NTP_transf_3→ LRR-repeats+AP-GTPase+COR*→                                                           | LRR-repeats+AP-GTPase+COR     | 886  | -        | Euryarchaeota       | Methanosarcina vacuolata     | leucine-rich repeat domain-containing protein [Methanosarcina vacuolata].     | GCF_000969905.1 |
| WP_052728059.1 | LRR-repeats+AP-GTPase+COR*→                                                                                            | LRR-repeats+AP-GTPase+COR     | 930  | -        | Euryarchaeota       | Methanosarcina mazei         | leucine-rich repeat domain-containing protein [Methanosarcina mazei].         | GCF_000970205.1 |
| WP_052728060.1 | <-PIN<-?<-SIG+TM+TM+TM+TM+TM+TM+TM+TM+TM+TM+TM+TM  ?→?→ LRR-repeats+AP-GTPase+COR*→                                    | LRR-repeats+AP-GTPase+COR     | 935  | -        | Euryarchaeota       | Methanosarcina mazei         | leucine-rich repeat domain-containing protein [Methanosarcina mazei].         | GCF_000970205.1 |
| WP_052735402.1 | LRR-repeats+AP-GTPase+COR*→                                                                                            | LRR-repeats+AP-GTPase+COR     | 845  | -        | Euryarchaeota       | Methanosarcina sp. 1.H.A.2.2 | leucine-rich repeat domain-containing protein [Methanosarcina sp. 1.H.A.2.2]. | GCF_000979975.1 |
| WP_052752245.1 | LRR-repeats+AP-GTPase+COR*→ TIR→                                                                                       | LRR-repeats+AP-GTPase+COR     | 1015 | -        | Betaproteobacteria  | Nitrosomonas communis        | leucine-rich repeat domain-containing protein [Nitrosomonas communis].        | GCF_001007935.1 |
| WP_054015538.1 | <-REC  ?→  <-?  ?→ LRR-repeats+AP-GTPase+COR+TIR*→                                                                     | LRR-repeats+AP-GTPase+COR+TIR | 1274 | -        | Gammaproteobacteria | Pseudoalteromonas sp. R3     | TIR domain-containing protein [Pseudoalteromonas sp. R3].                     | GCF_004014715.1 |
| WP_054015917.1 | LRR-repeats+AP-GTPase+COR+TIR*→  <-?<-?<-TM                                                                            | LRR-repeats+AP-GTPase+COR+TIR | 1128 | -        | Gammaproteobacteria | Pseudoalteromonas sp. R3     | leucine-rich repeat domain-containing protein [Pseudoalteromonas sp. R3].     | GCF_004014715.1 |
| WP_054961809.1 | DSBH+AraC-HTH+AraC-HTH→?→ LRR-repeats+AP-GTPase+COR*→  <-ABC_membrane+ABC_tran                                         | LRR-repeats+AP-GTPase+COR     | 1057 | -        | Gammaproteobacteria | Vibrio bivalvicida           | hypothetical protein [Vibrio bivalvicida].                                    | GCF_001399455.2 |
| WP_055505179.1 | <-ABC-ATPase<-?  ?→?→?→  <-?  LRR-repeats+AP-GTPase+COR*→?→?→?→?→  <-?<-?<-SIR2                                        | LRR-repeats+AP-GTPase+COR     | 941  | -        | Actinobacteria      | Nonomurea pusilla            | leucine-rich repeat domain-containing protein [Nonomurea pusilla].            | GCF_001417755.1 |
| WP_057935115.1 | SIG+Concanavalin-like+SUN→  <-?  ?→ FGS→?→?→?→ LRR-repeats+AP-GTPase+COR+TIR*→?→?→?→  <-?<-?  ?→ TIR→                  | LRR-repeats+AP-GTPase+COR+TIR | 1318 | -        | Bacteroidetes       | Pedobacter ginsenosidimitans | leucine-rich repeat domain-containing protein [Pedobacter ginsenosidimitans]. | GCF_001442625.1 |

| acc            | operon                                                                                                                                                                                       | architecture                      | len  | gen.name | taxend              | species                         | define                                                                           | gca             |
|----------------|----------------------------------------------------------------------------------------------------------------------------------------------------------------------------------------------|-----------------------------------|------|----------|---------------------|---------------------------------|----------------------------------------------------------------------------------|-----------------|
| WP_058183692.1 | LRR-repeats+AP-GTPase+COR+CASPASE*→ LRR-repeats→                                                                                                                                             | LRR-repeats+AP-GTPase+COR+CASPASE | 1194 | -        | Cyanobacteria       | Mastigocoleus testarum          | leucine-rich repeat domain-containing protein [Mastigocoleus testarum].          | GCF_001456025.1 |
| WP_058183771.1 | LRR-repeats+AP-GTPase+COR+EAD1*→                                                                                                                                                             | LRR-repeats+AP-GTPase+COR+EAD1    | 1014 | -        | Cyanobacteria       | Mastigocoleus testarum          | leucine-rich repeat domain-containing protein [Mastigocoleus testarum].          | GCF_001456025.1 |
| WP_058554438.1 | LRR-repeats+AP-GTPase+COR+TIR*→                                                                                                                                                              | LRR-repeats+AP-GTPase+COR+TIR     | 758  | -        | Gammaproteobacteria | Thiohalocapsa sp. ML1           | TIR domain-containing protein [Thiohalocapsa sp. ML1].                           | GCF_001469165.1 |
| WP_058998621.1 | LRR-repeats+AP-GTPase+COR*→?→?→ HNH→                                                                                                                                                         | LRR-repeats+AP-GTPase+COR         | 418  | -        | Cyanobacteria       | Leptolyngbya sp. NIES-2104      | leucine-rich repeat domain-containing protein [Leptolyngbya sp. NIES-2104].      | GCF_001485215.1 |
| WP_059136441.1 | LRR-repeats+AP-GTPase+COR+TIR*→  <-RnasePH+RnasePH+KH+S1                                                                                                                                     | LRR-repeats+AP-GTPase+COR+TIR     | 1173 | -        | Bacteroidetes       | Chryseobacterium greenlandense  | leucine-rich repeat domain-containing protein [Chryseobacterium greenlandense].  | GCF_001507325.1 |
| WP_061431817.1 | SIG+TM+TM+TM+TM+TM+TM+TM→  <-?  PSE→ PSE→  <-?  SAM-methylase→?→  <-?<-SIG+TPM_phosphatase+TM+TM+TM  PSE→ LRR-repeats+AP-GTPase+COR+TM+TM*→  <-?<-?<-?<-?  ?→  <-Classical-AAA+Classical-AAA | LRR-repeats+AP-GTPase+COR+TM+TM   | 670  | -        | Cyanobacteria       | Microcystis aeruginosa          | GTP-binding protein, partial [Microcystis aeruginosa].                           | GCF_001578075.1 |
| WP_062148002.1 | <-TPR-repeats+CASPASE  ?→?→ LRR-repeats+AP-GTPase+COR+DUF4404*→                                                                                                                              | LRR-repeats+AP-GTPase+COR+DUF4404 | 1474 | -        | Gammaproteobacteria | Beggiatoa leptomitiformis       | leucine-rich repeat domain-containing protein [Beggiatoa leptomitiformis].       | GCF_001305575.3 |
| WP_062292830.1 | LRR-repeats+AP-GTPase+COR*→  <-?<-Aminotran_1_2<-HU-IHF                                                                                                                                      | LRR-repeats+AP-GTPase+COR         | 946  | -        | Cyanobacteria       | Nostoc piscinale                | leucine-rich repeat domain-containing protein [Nostoc piscinale].                | GCF_001298445.1 |
| WP_062689807.1 | <-Cluster2368_2clades  ?→ ncRNA→?→?→?→?→ LRR-repeats+AP-GTPase+COR*→                                                                                                                         | LRR-repeats+AP-GTPase+COR         | 909  | -        | Gammaproteobacteria | Photobacterium sanguinicantri   | GTP-binding protein [Photobacterium sanguinicantri].                             | GCF_001563765.1 |
| WP_063362501.1 | LRR-repeats+AP-GTPase+COR+TIR*→                                                                                                                                                              | LRR-repeats+AP-GTPase+COR+TIR     | 1154 | -        | Gammaproteobacteria | Pseudoalteromonas luteoviolacea | leucine-rich repeat domain-containing protein [Pseudoalteromonas luteoviolacea]. | GCF_001625695.1 |
| WP_064232935.1 | LRR-repeats+AP-GTPase+COR*→                                                                                                                                                                  | LRR-repeats+AP-GTPase+COR         | 699  | -        | Gammaproteobacteria | Halomonas sp. ALS9              | hypothetical protein [Halomonas sp. ALS9].                                       | GCF_001651035.1 |
| WP_065709937.1 | LRR-repeats+AP-GTPase+COR*→  <-?<-?  ?→ ABC-ATPase→ tRNA→?→  <-?<-Pentapeptide-repeats                                                                                                       | LRR-repeats+AP-GTPase+COR         | 963  | -        | Cyanobacteria       | Synechococcus sp. PCC 7117      | leucine-rich repeat domain-containing protein [Synechococcus sp. PCC 7117].      | -               |
| WP_066434724.1 | LRR-repeats+AP-GTPase+COR*→                                                                                                                                                                  | LRR-repeats+AP-GTPase+COR         | 276  | -        | Bacteroidetes       | Gelidibacter algens             | hypothetical protein [Gelidibacter algens].                                      | GCF_001678675.1 |
| WP_067315083.1 | SMPB→?→  <-?  ?→  <-?  ?→?→ LRR-repeats+AP-GTPase+COR*→  <-SIG+TM+TM+TM  ?→  <-?  ?→ SIGMA-HTH→                                                                                              | LRR-repeats+AP-GTPase+COR         | 968  | -        | Actinobacteria      | Streptomyces griseochromogenes  | hypothetical protein [Streptomyces griseochromogenes].                           | GCF_001542625.1 |
| WP_067770734.1 | LRR-repeats+AP-GTPase+COR*→                                                                                                                                                                  | LRR-repeats+AP-GTPase+COR         | 1123 | -        | Cyanobacteria       | Nostoc sp. NIES-3756            | hypothetical protein [Nostoc sp. NIES-3756].                                     | GCF_001548375.1 |
| WP_068061695.1 | 7TMR-DISMED1→?→ SIG+Concanavalin-like+SUN→?→?→  <-?  ?→ LRR-repeats+AP-GTPase+COR+TIR*→ ABhydrolase+ABhydrolase+CASPASE+TPR-S→?→  <-tRNA<-?<-?<-Cluster2189_2clades                          | LRR-repeats+AP-GTPase+COR+TIR     | 1268 | -        | Gammaproteobacteria | Rheinheimera sp. SA_1           | TIR domain-containing protein [Rheinheimera sp. SA_1].                           | -               |
| WP_068843099.1 | LRR-repeats+AP-GTPase+COR*→  <-?  ?→?→  <-cNMPBD                                                                                                                                             | LRR-repeats+AP-GTPase+COR         | 1015 | -        | Bacteroidetes       | Flavobacterium chilense         | GTP-binding protein [Flavobacterium chilense].                                   | GCF_900142685.1 |
| WP_068887322.1 | LRR-repeats+AP-GTPase+COR+TIR*→ Cluster2230_2clades→?→?→  <-?<-?<-?<-Cluster2322_2clades                                                                                                     | LRR-repeats+AP-GTPase+COR+TIR     | 1168 | -        | Bacteroidetes       | Pedobacter panaciterrae         | leucine-rich repeat domain-containing protein [Pedobacter panaciterrae].         | GCF_001636695.1 |
| WP_069069853.1 | LRR-repeats+AP-GTPase+COR+TIR*→                                                                                                                                                              | LRR-repeats+AP-GTPase+COR+TIR     | 1138 | -        | Cyanobacteria       | Nostoc sp. KVJ20                | leucine-rich repeat protein [Nostoc sp. KVJ20].                                  | GCF_001712795.1 |
| WP_069070238.1 | LRR-repeats+AP-GTPase+COR*→  <-SIG+DADALIGASE-ATPgrasp<-?  ?→?→  <-?<-?<-CBS                                                                                                                 | LRR-repeats+AP-GTPase+COR         | 1078 | -        | Cyanobacteria       | Nostoc sp. KVJ20                | leucine-rich repeat domain-containing protein [Nostoc sp. KVJ20].                | GCF_001712795.1 |



| acc            | operon                                                                                               | architecture                      | len  | gen.name | taxend              | species                        | define                                                                                  | gca             |
|----------------|------------------------------------------------------------------------------------------------------|-----------------------------------|------|----------|---------------------|--------------------------------|-----------------------------------------------------------------------------------------|-----------------|
| WP_075170580.1 | RNA-Helicase→  <-PSE<-?<-?<-?<-?  ?→  <-TM+TM  LRR-repeats+AP-GTPase+COR*→  <-?<-Cluster1726_2clades | LRR-repeats+AP-GTPase+COR         | 960  | -        | Gammaproteobacteria | Pseudoalteromonas haloplanktis | GTP-binding protein [Pseudoalteromonas haloplanktis].                                   | GCF_001924935.1 |
| WP_075904287.1 | ABC-ATPase→ ABC-ATPase→?→?→  <-?  LRR-repeats+AP-GTPase+COR*→                                        | LRR-repeats+AP-GTPase+COR         | 801  | -        | Cyanobacteria       | Moorea bouillonii              | leucine-rich repeat domain-containing protein [Moorea bouillonii].                      | GCF_001942495.1 |
| WP_076382638.1 | <-Polbeta+HEPN<-?  ?→ LRR-repeats+AP-GTPase+COR+TIR*→ TIR→ TM+TM+TM→?→?→  <-CNMP+CRP-HTH             | LRR-repeats+AP-GTPase+COR+TIR     | 1349 | -        | Bacteroidetes       | Filimonas lacunae              | TIR domain-containing protein [Filimonas lacunae].                                      | GCF_002355595.1 |
| WP_076393053.1 | LRR-repeats+AP-GTPase+COR*→                                                                          | LRR-repeats+AP-GTPase+COR         | 925  | -        | Bacteroidetes       | Chryseobacterium               | MULTISPECIES: leucine-rich repeat domain-containing protein [Chryseobacterium].         | GCF_900156825.1 |
| WP_076396200.1 | LRR-repeats+AP-GTPase+COR*→  <-?  ?→ SIG+NUDIX→                                                      | LRR-repeats+AP-GTPase+COR         | 890  | -        | Bacteroidetes       | Chryseobacterium gambrini      | hypothetical protein [Chryseobacterium gambrini].                                       | GCF_900156825.1 |
| WP_076994187.1 | <-ABC-ATPase<-?  ?→?→  <-?  PSE→  <-?  LRR-repeats+AP-GTPase+COR*→  <-?  ?→  <-?<-?<-Aminotran_1_2   | LRR-repeats+AP-GTPase+COR         | 942  | -        | Actinobacteria      | Actinosynnema sp. ALI-1.44     | hypothetical protein [Actinosynnema sp. ALI-1.44].                                      | GCF_001984155.1 |
| WP_077025618.1 | LRR-repeats+AP-GTPase+COR*→?→  <-?<-?  ?→  <-?<-?<-ABC-ATPase                                        | LRR-repeats+AP-GTPase+COR         | 1153 | -        | Planctomycetes      | Fuerstia marisgermanicae       | leucine-rich repeat domain-containing protein [Fuerstia marisgermanicae].               | GCF_001983935.1 |
| WP_078402495.1 | LRR-repeats+AP-GTPase+COR*→                                                                          | LRR-repeats+AP-GTPase+COR         | 901  | -        | Bacteroidetes       | Elizabethkingia ursingii       | leucine-rich repeat domain-containing protein [Elizabethkingia ursingii].               | GCF_002022125.1 |
| WP_078608910.1 | <-RNA-Helicase  ?→?→  <-?  CI→ LRR-repeats+AP-GTPase+COR*→                                           | LRR-repeats+AP-GTPase+COR         | 1012 | -        | Gammaproteobacteria | Vibrio owensii                 | GTP-binding protein [Vibrio owensii].                                                   | GCF_002021755.1 |
| WP_078814763.1 | <-REC  LRR-repeats+AP-GTPase+COR+TIR*→?→?→  <-?  ?→  <-?<-NUDIX                                      | LRR-repeats+AP-GTPase+COR+TIR     | 959  | -        | Verrucomicrobia     | Prostheco bacter debontii      | leucine-rich repeat domain-containing protein [Prostheco bacter debontii].              | GCF_900167535.1 |
| WP_079184311.1 | LRR-repeats+AP-GTPase+COR*→?→  <-?<-SIGMA-HTH                                                        | LRR-repeats+AP-GTPase+COR         | 1056 | -        | Actinobacteria      | Streptomyces uncialis          | hypothetical protein [Streptomyces uncialis].                                           | GCF_001905345.1 |
| WP_079712025.1 | LRR-repeats+AP-GTPase+COR*→                                                                          | LRR-repeats+AP-GTPase+COR         | 882  | -        | Bacteroidetes       | Salegentibacter salinarum      | hypothetical protein [Salegentibacter salinarum].                                       | GCF_900168115.1 |
| WP_080603599.1 | LRR-repeats+AP-GTPase+COR+TM+TM*→                                                                    | LRR-repeats+AP-GTPase+COR+TM+TM   | 799  | -        | Cyanobacteria       | Microcystis aeruginosa         | leucine-rich repeat protein [Microcystis aeruginosa].                                   | -               |
| WP_080963556.1 | Cluster1140_2clades→?→ LRR-repeats+AP-GTPase+COR+TM+TM*→                                             | LRR-repeats+AP-GTPase+COR+TM+TM   | 830  | -        | Gammaproteobacteria | Pseudomonas putida             | GTP-binding protein [Pseudomonas putida].                                               | GCF_001027965.1 |
| WP_081155426.1 | LRR-repeats+AP-GTPase+COR*→  <-?<-?<-?<-?  ?→  <-?<-REC                                              | LRR-repeats+AP-GTPase+COR         | 1088 | -        | Bacteroidetes       | Niastella vici                 | hypothetical protein [Niastella vici].                                                  | GCF_002077945.1 |
| WP_081336246.1 | LRR-repeats+AP-GTPase+COR*→                                                                          | LRR-repeats+AP-GTPase+COR         | 1380 | -        | Actinobacteria      | Mycobacteroides chelonae       | hypothetical protein [Mycobacteroides chelonae].                                        | GCF_001853965.1 |
| WP_081583858.1 | LRR-repeats→ LRR-repeats+AP-GTPase+COR+CASPASE*→                                                     | LRR-repeats+AP-GTPase+COR+CASPASE | 1375 | -        | Cyanobacteria       | unclassified Tolypothrix       | MULTISPECIES: leucine-rich repeat domain-containing protein [unclassified Tolypothrix]. | GCF_015207145.1 |
| WP_081656227.1 | LRR-repeats+AP-GTPase+COR+TIR*→                                                                      | LRR-repeats+AP-GTPase+COR+TIR     | 1354 | -        | Cyanobacteria       | Fischerella sp. PCC 9431       | leucine-rich repeat domain-containing protein [Fischerella sp. PCC 9431].               | -               |
| WP_081983983.1 | Ferredoxin-RRM→?→ Cluster1494_2clades→  <-?<-?  ?→?→ LRR-repeats+AP-GTPase+COR+DUF4404*→             | LRR-repeats+AP-GTPase+COR+DUF4404 | 971  | -        | Betaproteobacteria  | Massilia sp. JS1662            | GTP-binding protein [Massilia sp. JS1662].                                              | GCF_000759615.1 |
| WP_082167682.1 | LRR-repeats+AP-GTPase+COR+TIR*→  <-?  Cluster850_2clades→                                            | LRR-repeats+AP-GTPase+COR+TIR     | 797  | -        | Alphaproteobacteria | Methylobacterium aquaticum     | TIR domain-containing protein, partial [Methylobacterium aquaticum].                    | GCF_001043915.1 |
| WP_082209748.1 | LRR-repeats+AP-GTPase+COR+TCAD4*→  <-Cluster5_5clades<-?  ?→?→ Pro_CA→                               | LRR-repeats+AP-GTPase+COR+TCAD4   | 714  | -        | Cyanobacteria       | Fischerella sp. PCC 9605       | leucine-rich repeat domain-containing protein [Fischerella sp. PCC 9605].               | GCF_000517105.1 |

| acc            | operon                                                                                                                                            | architecture                      | len  | gen.name | taxend              | species                          | define                                                                            | gca             |
|----------------|---------------------------------------------------------------------------------------------------------------------------------------------------|-----------------------------------|------|----------|---------------------|----------------------------------|-----------------------------------------------------------------------------------|-----------------|
| WP_082226537.1 | LRR-repeats→?→ LRR-repeats+AP-GTPase+COR*→  <-?<-?  ?→  <-?<-?<-?  Aminotran_1_2→                                                                 | LRR-repeats+AP-GTPase+COR         | 1171 | -        | Bacteroidetes       | Microscilla marina               | leucine-rich repeat domain-containing protein [Microscilla marina].               | GCF_000169175.1 |
| WP_083250213.1 | LRR-repeats+AP-GTPase+COR*→                                                                                                                       | LRR-repeats+AP-GTPase+COR         | 817  | -        | Euryarchaeota       | Methanosarcina sp. A14           | leucine-rich repeat domain-containing protein, partial [Methanosarcina sp. A14].  | GCF_001729375.1 |
| WP_083398305.1 | LRR-repeats→ LRR-repeats+AP-GTPase+COR+DrHyd*→?→?→?→?→  <-?<-SIG+TM+TM+TM+TM                                                                      | LRR-repeats+AP-GTPase+COR+DrHyd   | 751  | -        | Betaproteobacteria  | Nitrosomonas communis            | hypothetical protein [Nitrosomonas communis].                                     | GCF_900114745.1 |
| WP_083620324.1 | <-SIG+TM+TM+TM+TM+TM+TM+TM<-?  LRR-repeats+AP-GTPase+COR*→?→  <-HNH  Cluster1548_2clades→?→  <-?  CCTBP→                                          | LRR-repeats+AP-GTPase+COR         | 975  | -        | Cyanobacteria       | Planktothrix paucivesiculata     | leucine-rich repeat domain-containing protein [Planktothrix paucivesiculata].     | GCF_900009265.2 |
| WP_083622583.1 | Cluster1745_2clades→?→?→  <-?  ?→ LRR-repeats+AP-GTPase+COR*→                                                                                     | LRR-repeats+AP-GTPase+COR         | 1058 | -        | Cyanobacteria       | Planktothrix paucivesiculata     | leucine-rich repeat domain-containing protein [Planktothrix paucivesiculata].     | GCF_900009265.2 |
| WP_083850172.1 | LRR-repeats+AP-GTPase+COR*→                                                                                                                       | LRR-repeats+AP-GTPase+COR         | 1286 | -        | Deltaproteobacteria | Desulfovibrio sp. U5L            | GTP-binding protein [Desulfovibrio sp. U5L].                                      | -               |
| WP_083886975.1 | <-SIG+TM  ?→  <-?<-?  LRR-repeats→?→ LRR-repeats+AP-GTPase+COR*→                                                                                  | LRR-repeats+AP-GTPase+COR         | 863  | -        | Cyanobacteria       | Nodosilinea nodulosa             | hypothetical protein [Nodosilinea nodulosa].                                      | GCF_000309385.1 |
| WP_083887059.1 | RelE→ CHTH→ LRR-repeats→ PSE→  <-?  PSE→ LRR-repeats+AP-GTPase+COR*→  <-?<-?  COR+TIR→  <-REase-4                                                 | LRR-repeats+AP-GTPase+COR         | 410  | -        | Cyanobacteria       | Nodosilinea nodulosa             | leucine-rich repeat domain-containing protein [Nodosilinea nodulosa].             | GCF_000309385.1 |
| WP_083887212.1 | Cluster2123_2clades→?→  <-?<-?<-?  PSE→ LRR-repeats→ AP-GTPase*→                                                                                  | AP-GTPase                         | 221  | -        | Cyanobacteria       | Nodosilinea nodulosa             | 50S ribosome-binding GTPase [Nodosilinea nodulosa].                               | GCF_000309385.1 |
| WP_083918254.1 | LRR-repeats+AP-GTPase+COR+TIR*→  <-?<-?  ?→  <-?<-?<-SHS2                                                                                         | LRR-repeats+AP-GTPase+COR+TIR     | 954  | -        | Gammaproteobacteria | Methylosarcina fibrata           | TIR domain-containing protein [Methylosarcina fibrata].                           | GCF_000372865.1 |
| WP_084022355.1 | <-NUDIX  ?→  <-HNH<-?  ?→?→?→ LRR-repeats+AP-GTPase+COR+TIR*→                                                                                     | LRR-repeats+AP-GTPase+COR+TIR     | 850  | -        | Chlorobi            | Chlorobaculum limnaeum           | TIR domain-containing protein [Chlorobaculum limnaeum].                           | GCF_001747405.1 |
| WP_084172951.1 | LRR-repeats+AP-GTPase+COR*→                                                                                                                       | LRR-repeats+AP-GTPase+COR         | 639  | -        | Cyanobacteria       | Phormidium tenue                 | GTP-binding protein [Phormidium tenue].                                           | GCF_014696675.1 |
| WP_084177732.1 | LRR-repeats+AP-GTPase+COR+TM+TM*→  <-CASPASE+TM                                                                                                   | LRR-repeats+AP-GTPase+COR+TM+TM   | 985  | -        | Cyanobacteria       | Nostoc calcicola                 | leucine-rich repeat domain-containing protein [Nostoc calcicola].                 | GCF_001904715.1 |
| WP_084227301.1 | LRR-repeats+AP-GTPase+COR+TIR*→                                                                                                                   | LRR-repeats+AP-GTPase+COR+TIR     | 804  | -        | Cyanobacteria       | Nostoc sp. KVJ20                 | leucine-rich repeat domain-containing protein [Nostoc sp. KVJ20].                 | GCF_001712795.1 |
| WP_084428809.1 | LRR-repeats+AP-GTPase+COR*→                                                                                                                       | LRR-repeats+AP-GTPase+COR         | 944  | -        | Actinobacteria      | Kibdelosporangium aridum         | hypothetical protein [Kibdelosporangium aridum].                                  | GCF_900176515.1 |
| WP_084630566.1 | <-HhH-RADC+JAB  ?→ NTP_transf_3→ LRR-repeats+AP-GTPase+COR*→  <-?<-?  ?→  <-?  ?→  <-Cluster1409_2clades                                          | LRR-repeats+AP-GTPase+COR         | 906  | -        | Euryarchaeota       | Methanosarcina lacustris         | leucine-rich repeat domain-containing protein [Methanosarcina lacustris].         | GCF_000970265.1 |
| WP_084713364.1 | LRR-repeats+AP-GTPase+COR*→                                                                                                                       | LRR-repeats+AP-GTPase+COR         | 1355 | -        | Actinobacteria      | Streptacidiphilus jeojiense      | leucine-rich repeat domain-containing protein [Streptacidiphilus jeojiense].      | -               |
| WP_084763145.1 | Pentapeptide-repeats→  <-TPR+nSTAND1+BetaPropeller_WD40+BetaPropeller_WD40<-?  ?→  <-?  ?→  <-?  LRR-repeats+AP-GTPase+COR+CASPASE*→  <-RelE-ParE | LRR-repeats+AP-GTPase+COR+CASPASE | 1441 | -        | Cyanobacteria       | [Scytonema hofmanni] UTEX B 1581 | leucine-rich repeat domain-containing protein [[Scytonema hofmanni] UTEX B 1581]. | GCF_000582685.1 |
| WP_084765096.1 | LRR-repeats+AP-GTPase+COR*→                                                                                                                       | LRR-repeats+AP-GTPase+COR         | 940  | -        | Firmicutes          | Clostridium intestinale          | GTP-binding protein [Clostridium intestinale].                                    | -               |
| WP_084967529.1 | Cluster1877_2clades→  <-?  Cluster1140_2clades→?→ LRR-repeats+AP-GTPase+COR+TM+TM*→                                                               | LRR-repeats+AP-GTPase+COR+TM+TM   | 830  | -        | Gammaproteobacteria | Pseudomonas putida               | GTP-binding protein [Pseudomonas putida].                                         | GCF_002094785.1 |







| acc            | operon                                                                                           | architecture                      | len  | gen.name | taxend              | species                                            | define                                                                                              | gca             |
|----------------|--------------------------------------------------------------------------------------------------|-----------------------------------|------|----------|---------------------|----------------------------------------------------|-----------------------------------------------------------------------------------------------------|-----------------|
| WP_091435026.1 | <-Cluster1070_2clades<-ENDO3+NUDIX  HU-IHF→?→ LRR-repeats+AP-GTPase+COR*→                        | LRR-repeats+AP-GTPase+COR         | 916  | -        | Bacteroidetes       | Flavobacterium degerlachei                         | leucine-rich repeat domain-containing protein [Flavobacterium degerlachei].                         | GCF_900106645.1 |
| WP_091506051.1 | Cluster944_3clades→  <-?<-?  ?→  <-Cluster2045_2clades<-?  LRR-repeats+AP-GTPase+COR+TIR*→       | LRR-repeats+AP-GTPase+COR+TIR     | 997  | -        | Bacteroidetes       | Flexibacter flexilis                               | leucine-rich repeat domain-containing protein [Flexibacter flexilis].                               | GCF_900112255.1 |
| WP_091630534.1 | <-ABC-ATPase  ?→ LRR-repeats+AP-GTPase+COR*→  <-ABC_membrane+ABC_tran                            | LRR-repeats+AP-GTPase+COR         | 901  | -        | Actinobacteria      | Micromonospora peucetia                            | leucine-rich repeat domain-containing protein [Micromonospora peucetia].                            | GCF_900091625.1 |
| WP_092162518.1 | REC→ REC→?→?→?→ LRR-repeats+AP-GTPase+COR*→?→?→ SIG+WWE→?→?→ ABC-ATPase→ ABC-ATPase→             | LRR-repeats+AP-GTPase+COR         | 863  | -        | Deltaproteobacteria | Maridesulfovibrio ferrireducens                    | GTP-binding protein [Maridesulfovibrio ferrireducens].                                              | GCF_900101105.1 |
| WP_093066920.1 | LRR-repeats+AP-GTPase+COR+TIR*→?→?→  <-Thioredoxin  YBAK→                                        | LRR-repeats+AP-GTPase+COR+TIR     | 847  | -        | Gammaproteobacteria | Thiothrix caldifontis                              | TIR domain-containing protein [Thiothrix caldifontis].                                              | GCF_900107695.1 |
| WP_093070768.1 | LRR-repeats+AP-GTPase+COR+TIR*→                                                                  | LRR-repeats+AP-GTPase+COR+TIR     | 1327 | -        | Gammaproteobacteria | Thiothrix caldifontis                              | leucine-rich repeat domain-containing protein [Thiothrix caldifontis].                              | GCF_900107695.1 |
| WP_094331224.1 | Cluster1074_2clades→?→ LRR-repeats+AP-GTPase+COR+DUF4404*→  <-PSE<-?  ?→?→ SAM-methylase→        | LRR-repeats+AP-GTPase+COR+DUF4404 | 1016 | -        | Cyanobacteria       | Nostoc sp. 'Peltigera membranacea cyanobiont' 213  | leucine-rich repeat domain-containing protein [Nostoc sp. 'Peltigera membranacea cyanobiont' 213].  | GCF_002245975.1 |
| WP_094342929.1 | <-Arginase<-?  ?→ LRR-repeats+AP-GTPase+COR+TIR*→?→  <-?<-?<-ABC_membrane+ABC_tran               | LRR-repeats+AP-GTPase+COR+TIR     | 1126 | -        | Cyanobacteria       | Nostoc sp. 'Peltigera membranacea cyanobiont' 232  | leucine-rich repeat domain-containing protein [Nostoc sp. 'Peltigera membranacea cyanobiont' 232].  | GCF_002245985.1 |
| WP_094343165.1 | LRR-repeats+AP-GTPase+COR+TIR*→?→  <-?<-TIR<-?<-SIG+NUDIX                                        | LRR-repeats+AP-GTPase+COR+TIR     | 1023 | -        | Cyanobacteria       | Nostoc sp. 'Peltigera membranacea cyanobiont' 232  | leucine-rich repeat domain-containing protein [Nostoc sp. 'Peltigera membranacea cyanobiont' 232].  | GCF_002245985.1 |
| WP_094350322.1 | LRR-repeats+AP-GTPase+COR*→?→?→  <-ABhydrolase<-Cluster1087_2clades                              | LRR-repeats+AP-GTPase+COR         | 1217 | -        | Cyanobacteria       | Nostoc sp. 'Peltigera membranacea cyanobiont' 210A | leucine-rich repeat domain-containing protein [Nostoc sp. 'Peltigera membranacea cyanobiont' 210A]. | GCF_002246015.1 |
| WP_094350573.1 | LRR-repeats+AP-GTPase+COR+DUF4404*→ REC→                                                         | LRR-repeats+AP-GTPase+COR+DUF4404 | 1154 | -        | Cyanobacteria       | Nostoc sp. 'Peltigera membranacea cyanobiont' 210A | leucine-rich repeat domain-containing protein [Nostoc sp. 'Peltigera membranacea cyanobiont' 210A]. | GCF_002246015.1 |
| WP_094350736.1 | LRR-repeats+AP-GTPase+COR*→                                                                      | LRR-repeats+AP-GTPase+COR         | 996  | -        | Cyanobacteria       | Nostoc sp. 'Peltigera membranacea cyanobiont' 210A | leucine-rich repeat domain-containing protein [Nostoc sp. 'Peltigera membranacea cyanobiont' 210A]. | -               |
| WP_094350925.1 | <-TPR+TPR<-?  ?→?→ ABhydrolase→?→  <-?  LRR-repeats+AP-GTPase+COR+TIR*→  <-?<-?<-?<-?<-SIG+NUDIX | LRR-repeats+AP-GTPase+COR+TIR     | 1078 | -        | Cyanobacteria       | Nostoc sp. 'Peltigera membranacea cyanobiont' 210A | leucine-rich repeat domain-containing protein [Nostoc sp. 'Peltigera membranacea cyanobiont' 210A]. | GCF_002246015.1 |
| WP_094408510.1 | <-ABC-ATPase  ICLR-HTH→ LRR-repeats+AP-GTPase+COR+TIR*→  <-SIG+TM+TM+TM+TM+TM+TM+TM+TM           | LRR-repeats+AP-GTPase+COR+TIR     | 974  | -        | Alphaproteobacteria | Elstera cyanobacteriorum                           | leucine-rich repeat domain-containing protein [Elstera cyanobacteriorum].                           | GCF_014643715.1 |
| WP_094530685.1 | LRR-repeats+AP-GTPase+COR*→  <-PSE  ?→?→?→  <-ABC-ATPase<-ABC-ATPase<-SIG+TM+TM+TM+TM+TM+TM+TM   | LRR-repeats+AP-GTPase+COR         | 1019 | -        | Cyanobacteria       | Pseudanabaena sp. SR411                            | leucine-rich repeat domain-containing protein [Pseudanabaena sp. SR411].                            | GCF_002251945.1 |

| acc            | operon                                                                                                          | architecture                      | len  | gen.name | taxend        | species                        | define                                                                           | gca             |
|----------------|-----------------------------------------------------------------------------------------------------------------|-----------------------------------|------|----------|---------------|--------------------------------|----------------------------------------------------------------------------------|-----------------|
| WP_094533976.1 | Cluster54_3clades→ Cluster1093_2clades→ LRR-repeats+AP-GTPase+COR+TM+TM*→                                       | LRR-repeats+AP-GTPase+COR+TM+TM   | 1051 | -        | Cyanobacteria | Pseudanabaena sp. SR411        | leucine-rich repeat domain-containing protein [Pseudanabaena sp. SR411].         | GCF_002251945.1 |
| WP_095644020.1 | LRR-repeats+AP-GTPase+COR*→                                                                                     | LRR-repeats+AP-GTPase+COR         | 774  | -        | Euryarchaeota | Methanosarcina spelaei         | leucine-rich repeat domain-containing protein, partial [Methanosarcina spelaei]. | GCF_002287235.1 |
| WP_095644584.1 | LRR-repeats+AP-GTPase+COR*→                                                                                     | LRR-repeats+AP-GTPase+COR         | 877  | -        | Euryarchaeota | Methanosarcina spelaei         | leucine-rich repeat domain-containing protein [Methanosarcina spelaei].          | GCF_002287235.1 |
| WP_096193484.1 | LRR-repeats+AP-GTPase+COR+TIR*→?→  <-FAD-NAD-dep-oxidoreductase<-?<-?<-RNA-Helicase                             | LRR-repeats+AP-GTPase+COR+TIR     | 1173 | -        | Bacteroidetes | Cytophagales bacterium TFI 002 | leucine-rich repeat domain-containing protein [Cytophagales bacterium TFI 002].  | -               |
| WP_096535168.1 | LRR-repeats+AP-GTPase+COR*→  <-ClpABN-AAA+ClpABC-AAA<-?  METHYLASE→                                             | LRR-repeats+AP-GTPase+COR         | 1018 | -        | Cyanobacteria | Nostoc linckia                 | leucine-rich repeat domain-containing protein [Nostoc linckia].                  | GCF_002368035.1 |
| WP_096538729.1 | <-Pkinase+Pentapeptide<-?<-?  ?→  <-?  ?→ LRR-repeats+AP-GTPase+COR+TIR*→                                       | LRR-repeats+AP-GTPase+COR+TIR     | 1033 | -        | Cyanobacteria | Nostoc linckia                 | leucine-rich repeat domain-containing protein [Nostoc linckia].                  | GCF_002368035.1 |
| WP_096538739.1 | LRR-repeats+AP-GTPase+COR+TIR*→?→  <-?  ?→?→?→ RPN10→                                                           | LRR-repeats+AP-GTPase+COR+TIR     | 1115 | -        | Cyanobacteria | Nostoc linckia                 | leucine-rich repeat domain-containing protein [Nostoc linckia].                  | GCF_002368035.1 |
| WP_096551538.1 | LRR-repeats+AP-GTPase+COR*→                                                                                     | LRR-repeats+AP-GTPase+COR         | 818  | -        | Cyanobacteria | Nostoc sp. NIES-4103           | leucine-rich repeat domain-containing protein [Nostoc sp. NIES-4103].            | GCF_002368335.1 |
| WP_096566542.1 | HNH→ PSE→ LRR-repeats+AP-GTPase+COR*→?→?→?→  <-?  ?→  <-?  PAIREDC-HTH→                                         | LRR-repeats+AP-GTPase+COR         | 1268 | -        | Cyanobacteria | Scytonema sp. NIES-4073        | leucine-rich repeat protein [Scytonema sp. NIES-4073].                           | GCF_002368435.1 |
| WP_096579899.1 | <-DSBH<-?<-?<-?<-ParA-Soj-PloopNTase<-?  Cluster5_5clades→ LRR-repeats+AP-GTPase+COR+DUF4404*→                  | LRR-repeats+AP-GTPase+COR+DUF4404 | 1153 | -        | Cyanobacteria | Anabaenopsis circularis        | leucine-rich repeat domain-containing protein [Anabaenopsis circularis].         | GCF_002367975.1 |
| WP_096585603.1 | HISKIN→  <-?<-?  LRR-repeats+AP-GTPase+COR*→                                                                    | LRR-repeats+AP-GTPase+COR         | 937  | -        | Cyanobacteria | Anabaenopsis circularis        | leucine-rich repeat domain-containing protein [Anabaenopsis circularis].         | GCF_002367975.1 |
| WP_096586956.1 | <-ABC-ATPase  ?→ Pkinase+TM→ Chromo-N+CHROMO→  <-?  LRR-repeats+AP-GTPase+COR+CASPASE*→  <-?<-?  Aminotran_1_2→ | LRR-repeats+AP-GTPase+COR+CASPASE | 1148 | -        | Cyanobacteria | Calothrix sp. NIES-2098        | leucine-rich repeat domain-containing protein [Calothrix sp. NIES-2098].         | GCF_002368175.1 |
| WP_096588412.1 | LRR-repeats+AP-GTPase+COR*→ TPR-repeats+CASPASE→                                                                | LRR-repeats+AP-GTPase+COR         | 1066 | -        | Cyanobacteria | Calothrix sp. NIES-2098        | leucine-rich repeat domain-containing protein [Calothrix sp. NIES-2098].         | GCF_002368175.1 |
| WP_096598125.1 | LRR-repeats+AP-GTPase+COR+DUF4404*→?→  <-?  ?→  <-RelE-ParE                                                     | LRR-repeats+AP-GTPase+COR+DUF4404 | 1134 | -        | Cyanobacteria | Calothrix sp. NIES-2100        | leucine-rich repeat domain-containing protein [Calothrix sp. NIES-2100].         | GCF_002368195.1 |
| WP_096598883.1 | SIG+TM→?→ tRNA→  <-?  LRR-repeats+AP-GTPase+COR+CASPASE*→  <-PSE<-?  ?→?→  <-?<-?<-Acyolphosphatase             | LRR-repeats+AP-GTPase+COR+CASPASE | 1108 | -        | Cyanobacteria | Calothrix sp. NIES-2100        | leucine-rich repeat domain-containing protein [Calothrix sp. NIES-2100].         | GCF_002368195.1 |
| WP_096598950.1 | LRR-repeats+AP-GTPase+COR+TM+TM*→  <-?  ?→  <-REC                                                               | LRR-repeats+AP-GTPase+COR+TM+TM   | 929  | -        | Cyanobacteria | Calothrix sp. NIES-2100        | leucine-rich repeat domain-containing protein [Calothrix sp. NIES-2100].         | GCF_002368195.1 |
| WP_096621624.1 | LRR-repeats→ PSE→ LRR-repeats+AP-GTPase+COR+CASPASE*→                                                           | LRR-repeats+AP-GTPase+COR+CASPASE | 981  | -        | Cyanobacteria | Microchaete diplosiphon        | CHAT domain-containing protein [Microchaete diplosiphon].                        | GCF_002368275.1 |
| WP_096658516.1 | LRR-repeats+AP-GTPase+COR*→ PSE→?→  <-?  ?→  <-?  ?→  <-?<-Pentapeptide-repeats                                 | LRR-repeats+AP-GTPase+COR         | 708  | -        | Cyanobacteria | Calothrix parasitica           | leucine-rich repeat domain-containing protein [Calothrix parasitica].            | GCF_002368095.1 |

| acc            | operon                                                                                                                                         | architecture                      | len  | gen.name | taxend              | species                                          | define                                                                                                     | gca             |
|----------------|------------------------------------------------------------------------------------------------------------------------------------------------|-----------------------------------|------|----------|---------------------|--------------------------------------------------|------------------------------------------------------------------------------------------------------------|-----------------|
| WP_096683758.1 | <-TPR-repeats+CASPASE  ?->  <-?<-PSE  ?->  <-ParB<-ParA-Soj-PloopNTPase  PSE-> LRR-repeats+AP-GTPase+COR+EAD1*-> ParB->  <-NACHT               | LRR-repeats+AP-GTPase+COR+EAD1    | 1112 | -        | Cyanobacteria       | Calothrix sp. NIES-4105                          | leucine-rich repeat domain-containing protein [Calothrix sp. NIES-4105].                                   | GCF_002368415.1 |
| WP_096729037.1 | <-TPR-repeats+CASPASE  ?->  <-?<-PSE  ?->  <-ParB<-ParA-Soj-PloopNTPase  PSE-> LRR-repeats-> LRR-repeats+AP-GTPase+COR+EAD1*-> ParB->  <-NACHT | LRR-repeats+AP-GTPase+COR+EAD1    | 885  | -        | Cyanobacteria       | Calothrix sp. NIES-4071                          | leucine-rich repeat domain-containing protein [Calothrix sp. NIES-4071].                                   | GCF_002368455.1 |
| WP_096789603.1 | <-S4<-?  ?->?->?->?-> LRR-repeats+AP-GTPase+COR*->  <-tRNA<-rRNA<-rRNA<-tRNA<-tRNA<-rRNA<-FAD-NAD-dep-oxidoreductase                           | LRR-repeats+AP-GTPase+COR         | 972  | -        | Alphaproteobacteria | Phaeobacter piscinae                             | leucine-rich repeat domain-containing protein [Phaeobacter piscinae].                                      | GCF_002407245.1 |
| WP_096793541.1 | <-Cluster2127_2clades  ?->  <-?  ?-> LRR-repeats+AP-GTPase+COR*->                                                                              | LRR-repeats+AP-GTPase+COR         | 938  | -        | Gammaproteobacteria | Pseudoalteromonas sp. 1_2015MBL_MicDiv           | GTP-binding protein [Pseudoalteromonas sp. 1_2015MBL_MicDiv].                                              | GCF_002407505.1 |
| WP_097126565.1 | LRR-repeats+AP-GTPase+COR*->  <-?  ?->  <-?  ?->  <-?  ?->  <-HISKIN                                                                           | LRR-repeats+AP-GTPase+COR         | 1103 | -        | Bacteroidetes       | Spirosoma fluviale                               | leucine-rich repeat domain-containing protein [Spirosoma fluviale].                                        | GCF_900230225.1 |
| WP_097298537.1 | LRR-repeats+AP-GTPase+COR*->                                                                                                                   | LRR-repeats+AP-GTPase+COR         | 802  | -        | Euryarchaeota       | Candidatus Methanoperedens sp. BLZ2              | leucine-rich repeat domain-containing protein [Candidatus Methanoperedens sp. BLZ2].                       | GCF_002487355.1 |
| WP_097998439.1 | LRR-repeats+AP-GTPase+COR*->                                                                                                                   | LRR-repeats+AP-GTPase+COR         | 906  | -        | Firmicutes          | Bacillus cereus                                  | GTP-binding protein [Bacillus cereus].                                                                     | GCF_002575505.1 |
| WP_098908392.1 | LRR-repeats+AP-GTPase+COR*->                                                                                                                   | LRR-repeats+AP-GTPase+COR         | 934  | -        | Firmicutes          | Bacillus toyonensis                              | GTP-binding protein [Bacillus toyonensis].                                                                 | GCF_002551725.1 |
| WP_099009377.1 | LRR-repeats+AP-GTPase+COR+EAD11*->                                                                                                             | LRR-repeats+AP-GTPase+COR+EAD11   | 813  | -        | Bacteroidetes       | Lewinellaceae bacterium SD302                    | leucine-rich repeat domain-containing protein [Lewinellaceae bacterium SD302].                             | -               |
| WP_099066006.1 | LRR-repeats+AP-GTPase+COR+TIR*->  <-PSE<-Arginase  ?->  <-?  ?->?->?-> Pro_CA->                                                                | LRR-repeats+AP-GTPase+COR+TIR     | 1138 | -        | Cyanobacteria       | Nostoc linckia                                   | leucine-rich repeat domain-containing protein [Nostoc linckia].                                            | GCF_002607965.1 |
| WP_099069019.1 | <-Pkinase+Pentapeptide<-?<-?  ?->  <-?  LRR-repeats+AP-GTPase+COR+TIR*->?->  <-SIG+TM+TM+TM+TM+TM+TM<-?  ?-> Cluster1668_2clades->             | LRR-repeats+AP-GTPase+COR+TIR     | 1053 | -        | Cyanobacteria       | Nostoc linckia                                   | TIR domain-containing protein [Nostoc linckia].                                                            | GCF_002607965.1 |
| WP_099076744.1 | LRR-repeats+AP-GTPase+COR+TIR*->  <-PSE<-Arginase                                                                                              | LRR-repeats+AP-GTPase+COR+TIR     | 1138 | -        | Cyanobacteria       | Nostoc linckia                                   | leucine-rich repeat domain-containing protein [Nostoc linckia].                                            | GCF_002608325.1 |
| WP_099103609.1 | LRR-repeats+AP-GTPase+COR+TM+TM*->                                                                                                             | LRR-repeats+AP-GTPase+COR+TM+TM   | 825  | -        | Cyanobacteria       | Nostoc sp. 'Peltigera malacea cyanobiont' DB3992 | leucine-rich repeat domain-containing protein, partial [Nostoc sp. 'Peltigera malacea cyanobiont' DB3992]. | -               |
| WP_099151645.1 | SIG+TM+TM+TM+HISKIN->?-> tRNA->?->?-> LRR-repeats+AP-GTPase+COR+EAD11*->                                                                       | LRR-repeats+AP-GTPase+COR+EAD11   | 881  | -        | Bacteroidetes       | Flavilitoribacter nigricans                      | leucine-rich repeat domain-containing protein [Flavilitoribacter nigricans].                               | GCF_002646595.1 |
| WP_099285181.1 | LRR-repeats+AP-GTPase+COR*->?->  <-?<-SIGMA-HTH                                                                                                | LRR-repeats+AP-GTPase+COR         | 1056 | -        | Actinobacteria      | unclassified Streptomyces                        | MULTISPECIES: GTPase [unclassified Streptomyces].                                                          | GCF_002705975.1 |
| WP_099426012.1 | TPR-repeats->?->?-> tRNA->?-> HNH-> LRR-repeats+AP-GTPase+COR+DUF4404*->?->?->?-> REC->                                                        | LRR-repeats+AP-GTPase+COR+DUF4404 | 1272 | -        | Cyanobacteria       | Tychonema bourrellyi                             | leucine-rich repeat domain-containing protein [Tychonema bourrellyi].                                      | GCF_002412335.2 |
| WP_099426065.1 | GTPase-AIG->?->?-> Cluster53_2clades->?-> LRR-repeats+AP-GTPase+COR+DUF4404*->                                                                 | LRR-repeats+AP-GTPase+COR+DUF4404 | 959  | -        | Cyanobacteria       | Tychonema bourrellyi                             | leucine-rich repeat domain-containing protein [Tychonema bourrellyi].                                      | GCF_002412335.2 |
| WP_099506658.1 | ABC_membrane+ABC_tran->  <-?  ?->  <-?  PSE->  <-PSE  LRR-repeats+AP-GTPase+COR*->                                                             | LRR-repeats+AP-GTPase+COR         | 799  | -        | Actinobacteria      | Streptomyces dengpaensis                         | hypothetical protein [Streptomyces dengpaensis].                                                           | GCF_002946835.1 |





| acc            | operon                                                                                            | architecture                      | len  | gen.name | taxend              | species                              | define                                                                                       | gca             |
|----------------|---------------------------------------------------------------------------------------------------|-----------------------------------|------|----------|---------------------|--------------------------------------|----------------------------------------------------------------------------------------------|-----------------|
| WP_106289057.1 | LRR-repeats+AP-GTPase+COR+DUF4404*→                                                               | LRR-repeats+AP-GTPase+COR+DUF4404 | 918  | -        | Cyanobacteria       | Merismopedia glauca                  | leucine-rich repeat domain-containing protein [Merismopedia glauca].                         | GCF_003003775.1 |
| WP_106331563.1 | TPR-repeats→?→?→?→ tRNA→  <-PSE<-?  Cluster53_2clades→?→ LRR-repeats+AP-GTPase+COR+DUF4404*→      | LRR-repeats+AP-GTPase+COR+DUF4404 | 1048 | -        | Cyanobacteria       | filamentous cyanobacterium Phorm 6   | leucine-rich repeat domain-containing protein [filamentous cyanobacterium Phorm 6].          | -               |
| WP_106333130.1 | LRR-repeats+AP-GTPase+COR+DUF4404*→?→?→  <-?<-?<-?<-RelE-ParE                                     | LRR-repeats+AP-GTPase+COR+DUF4404 | 786  | -        | Cyanobacteria       | filamentous cyanobacterium Phorm 6   | leucine-rich repeat domain-containing protein, partial [filamentous cyanobacterium Phorm 6]. | -               |
| WP_106364139.1 | <-ABC-ATPase  ?→?→ LRR-repeats+AP-GTPase+COR*→                                                    | LRR-repeats+AP-GTPase+COR         | 1146 | -        | Actinobacteria      | Glycomyces artemisiae                | hypothetical protein [Glycomyces artemisiae].                                                | GCF_003002955.1 |
| WP_106623442.1 | LRR-repeats+AP-GTPase+COR+TM+TM*→  <-ABC-ATPase                                                   | LRR-repeats+AP-GTPase+COR+TM+TM   | 970  | -        | Bacteroidetes       | Sphingobacteriales bacterium UPWRP_1 | leucine-rich repeat domain-containing protein [Sphingobacteriales bacterium UPWRP_1].        | -               |
| WP_106872506.1 | RelE-ParE→ LRR-repeats+AP-GTPase+COR+TIR*→                                                        | LRR-repeats+AP-GTPase+COR+TIR     | 1126 | -        | Cyanobacteria       | unclassified Cyanobacteria           | MULTISPECIES: leucine-rich repeat domain-containing protein [unclassified Cyanobacteria].    | -               |
| WP_106922429.1 | LRR-repeats+AP-GTPase+COR+TIR*→  <-REase-4                                                        | LRR-repeats+AP-GTPase+COR+TIR     | 826  | -        | Cyanobacteria       | filamentous cyanobacterium CCP3      | leucine-rich repeat domain-containing protein [filamentous cyanobacterium CCP3].             | -               |
| WP_107346265.1 | Arginase→?→  <-?  ?→ LRR-repeats+AP-GTPase+COR+TIR*→  <-?<-?<-?<-ABC-ATPase  ?→ REC→              | LRR-repeats+AP-GTPase+COR+TIR     | 1173 | -        | Alphaproteobacteria | Rhodopseudomonas palustris           | leucine-rich repeat domain-containing protein [Rhodopseudomonas palustris].                  | GCF_003031265.1 |
| WP_107357189.1 | Arginase→?→  <-?  ?→ LRR-repeats+AP-GTPase+COR+TIR*→  <-?<-?<-?<-ABC-ATPase  ?→ REC→              | LRR-repeats+AP-GTPase+COR+TIR     | 1173 | -        | Alphaproteobacteria | Rhodopseudomonas palustris           | leucine-rich repeat domain-containing protein [Rhodopseudomonas palustris].                  | GCF_003031245.1 |
| WP_107867044.1 | LRR-repeats+AP-GTPase+COR+GT4*→                                                                   | LRR-repeats+AP-GTPase+COR+GT4     | 1510 | -        | Firmicutes          | Agitococcus lubricus                 | leucine-rich repeat protein [Agitococcus lubricus].                                          | GCF_003051055.1 |
| WP_108091428.1 | ABC_membrane+ABC_tran→  <-?  CI→ LRR-repeats+AP-GTPase+COR+TIR*→                                  | LRR-repeats+AP-GTPase+COR+TIR     | 1243 | -        | Gammaproteobacteria | Vibrio splendidus                    | TIR domain-containing protein [Vibrio splendidus].                                           | GCF_003050005.1 |
| WP_108099554.1 | <-Cluster1756_2clades<-?<-?<-?<-?  ?→?→ LRR-repeats+AP-GTPase+COR*→                               | LRR-repeats+AP-GTPase+COR         | 1107 | -        | Gammaproteobacteria | Vibrio splendidus                    | 50S ribosome-binding GTPase [Vibrio splendidus].                                             | GCF_003050165.1 |
| WP_108112883.1 | <-HISKIN<-?  LRR-repeats+AP-GTPase+COR+TIR*→  <-HISKIN<-HISKIN                                    | LRR-repeats+AP-GTPase+COR+TIR     | 973  | -        | Bacteroidetes       | Kordia periserrulae                  | leucine-rich repeat domain-containing protein [Kordia periserrulae].                         | GCF_003054265.1 |
| WP_108114870.1 | CHTH→  <-?<-?  RNA-Helicase→?→?→  <-?  LRR-repeats+AP-GTPase+COR+TIR*→  <-?<-?<-?  ?→  <-TM+TM+TM | LRR-repeats+AP-GTPase+COR+TIR     | 1012 | -        | Bacteroidetes       | Kordia periserrulae                  | leucine-rich repeat domain-containing protein [Kordia periserrulae].                         | GCF_003054265.1 |
| WP_108176265.1 | LRR-repeats+AP-GTPase+COR*→?→ ABC_membrane+ABC_tran→ ABC_membrane+ABC_tran→                       | LRR-repeats+AP-GTPase+COR         | 1122 | -        | Gammaproteobacteria | Vibrio splendidus                    | hypothetical protein [Vibrio splendidus].                                                    | GCF_003050125.1 |
| WP_108207948.1 | REC→?→?→?→  <-ABC_membrane+ABC_tran<-ABC_membrane+ABC_tran<-?  LRR-repeats+AP-GTPase+COR*→        | LRR-repeats+AP-GTPase+COR         | 960  | -        | Gammaproteobacteria | Vibrio splendidus                    | leucine-rich repeat domain-containing protein [Vibrio splendidus].                           | GCF_003050345.1 |
| WP_108801834.1 | <-REC<-?  LRR-repeats+AP-GTPase+COR+TM+TM*→?→?→?→?→  <-?<-SIG+TM+TM+TM+HISKIN                     | LRR-repeats+AP-GTPase+COR+TM+TM   | 1086 | -        | Bacteroidetes       | Aquimarina sp. Aq107                 | leucine-rich repeat domain-containing protein [Aquimarina sp. Aq107].                        | GCF_900299505.1 |
| WP_109009086.1 | ABhydrolase→?→  <-PSE  LRR-repeats+AP-GTPase+COR+TIR*→  <-?<-?<-?<-?<-SIG+NUDIX                   | LRR-repeats+AP-GTPase+COR+TIR     | 1078 | -        | Cyanobacteria       | Nostoc commune                       | leucine-rich repeat domain-containing protein [Nostoc commune].                              | GCF_003113895.1 |



| acc            | operon                                                                                                                                                                                              | architecture                      | len  | gen.name | taxend              | species                          | define                                                                            | gca             |
|----------------|-----------------------------------------------------------------------------------------------------------------------------------------------------------------------------------------------------|-----------------------------------|------|----------|---------------------|----------------------------------|-----------------------------------------------------------------------------------|-----------------|
| WP_109322545.1 | LRR-repeats+AP-GTPase+COR*→?→?→?→ Cluster978_2clades→                                                                                                                                               | LRR-repeats+AP-GTPase+COR         | 841  | -        | Bacteroidetes       | Allopeudarcicella aquatilis      | hypothetical protein [Allopeudarcicella aquatilis].                               | GCF_003143535.1 |
| WP_109617479.1 | LRR-repeats+AP-GTPase+COR*→                                                                                                                                                                         | LRR-repeats+AP-GTPase+COR         | 1124 | -        | Bacteroidetes       | Chryseobacterium oncorhynchi     | leucine-rich repeat domain-containing protein [Chryseobacterium oncorhynchi].     | GCF_002899895.1 |
| WP_109694822.1 | LRR-repeats+AP-GTPase+COR+TIR*→                                                                                                                                                                     | LRR-repeats+AP-GTPase+COR+TIR     | 1143 | -        | Bacteroidetes       | Chitinophaga deserti             | TIR domain-containing protein [Chitinophaga deserti].                             | -               |
| WP_110392243.1 | ABC-ATPase→?→ LRR-repeats+AP-GTPase+COR+TIR*→                                                                                                                                                       | LRR-repeats+AP-GTPase+COR+TIR     | 1128 | -        | Betaproteobacteria  | Rivicola pingtungensis           | leucine-rich repeat domain-containing protein [Rivicola pingtungensis].           | GCF_003201855.1 |
| WP_110578614.1 | SIG+TM+TM+TM+TM+TM+TM+TM+TM→  <-PSE  Mbetalac→ SAM-methylase→?→  <-?<-SIG+TPM_phosphatase+TM+TM+TM  LRR-repeats+AP-GTPase+COR+TM+TM*→  <-?<-?<-?<-Pro_CA  ?→  <-?<-tRNA<-tRNA<-Ferredoxin-betagrasp | LRR-repeats+AP-GTPase+COR+TM+TM   | 865  | -        | Cyanobacteria       | Microcystis aeruginosa           | leucine-rich repeat domain-containing protein [Microcystis aeruginosa].           | GCF_003206555.1 |
| WP_110984619.1 | <-Cluster1569_2clades  Mbetalac→  <-?<-?  ?→ Mbetalac→  <-?  LRR-repeats+AP-GTPase+COR*→?→ PIN→  <-Cluster1559_2clades                                                                              | LRR-repeats+AP-GTPase+COR         | 995  | -        | Cyanobacteria       | Acaryochloris sp. RCC1774        | leucine-rich repeat domain-containing protein [Acaryochloris sp. RCC1774].        | -               |
| WP_111129223.1 | LRR-repeats+AP-GTPase+COR*→                                                                                                                                                                         | LRR-repeats+AP-GTPase+COR         | 894  | -        | Bacteroidetes       | Mesonina sp. K7                  | 50S ribosome-binding GTPase [Mesonia sp. K7].                                     | GCF_003233725.1 |
| WP_111283162.1 | LRR-repeats+AP-GTPase+COR*→  <-?  ?→?→  <-?  ?→?→  <-cNMPBD                                                                                                                                         | LRR-repeats+AP-GTPase+COR         | 1144 | -        | Bacteroidetes       | Flavobacterium ginsenosidimutans | leucine-rich repeat domain-containing protein [Flavobacterium ginsenosidimutans]. | GCF_003254625.1 |
| WP_111625904.1 | LRR-repeats+AP-GTPase+COR*→                                                                                                                                                                         | LRR-repeats+AP-GTPase+COR         | 846  | -        | Bacteroidetes       | Gelidibacter algens              | hypothetical protein [Gelidibacter algens].                                       | GCF_003259265.1 |
| WP_111845807.1 | LRR-repeats+AP-GTPase+COR*→                                                                                                                                                                         | LRR-repeats+AP-GTPase+COR         | 812  | -        | Bacteroidetes       | Aequorivita antarctica           | hypothetical protein, partial [Aequorivita antarctica].                           | -               |
| WP_112086237.1 | LRR-repeats+AP-GTPase+COR*→                                                                                                                                                                         | LRR-repeats+AP-GTPase+COR         | 847  | -        | Bacteroidetes       | Flavobacterium lacus             | hypothetical protein [Flavobacterium lacus].                                      | GCF_003268815.1 |
| WP_112134132.1 | LRR-repeats+AP-GTPase+COR*→?→  <-?<-?<-?<-REC<-HISKIN                                                                                                                                               | LRR-repeats+AP-GTPase+COR         | 1186 | -        | Actinobacteria      | Glycomyces dulcitolivorans       | leucine-rich repeat domain-containing protein [Glycomyces dulcitolivorans].       | GCF_003265355.1 |
| WP_112263949.1 | wHTH-4stranded+TPRs+APATPase+TPR-repeats→?→?→?→ ABC_membrane+ABC_tran→?→?→ LRR-repeats+AP-GTPase+COR*→ COR→                                                                                         | LRR-repeats+AP-GTPase+COR         | 608  | -        | Actinobacteria      | Lentzea terrae                   | leucine-rich repeat domain-containing protein [Lentzea terrae].                   | GCF_003265345.1 |
| WP_114082655.1 | Cluster5_5clades→ LRR-repeats+AP-GTPase+COR+TM+TM*→  <-CASPASE+TM                                                                                                                                   | LRR-repeats+AP-GTPase+COR+TM+TM   | 904  | -        | Cyanobacteria       | Nostoc sp. ATCC 53789            | leucine-rich repeat domain-containing protein [Nostoc sp. ATCC 53789].            | GCF_003326245.1 |
| WP_114084090.1 | Pentapeptide-repeats→  <-?<-?  ?→?→  <-Arginase<-?  LRR-repeats+AP-GTPase+COR+TIR*→?→  <-?  ?→?→?→?→ APATPase+TPR+TPR+TPR→                                                                          | LRR-repeats+AP-GTPase+COR+TIR     | 802  | -        | Cyanobacteria       | Nostoc sp. ATCC 53789            | leucine-rich repeat domain-containing protein [Nostoc sp. ATCC 53789].            | GCF_003326245.1 |
| WP_114085324.1 | ABhydrolase→?→  <-?  LRR-repeats+AP-GTPase+COR+TIR*→  <-?<-?<-?<-SIG+NUDIX                                                                                                                          | LRR-repeats+AP-GTPase+COR+TIR     | 1069 | -        | Cyanobacteria       | Nostoc sp. ATCC 53789            | leucine-rich repeat domain-containing protein [Nostoc sp. ATCC 53789].            | GCF_003326245.1 |
| WP_114085448.1 | LRR-repeats+AP-GTPase+COR+CASPASE*→?→?→?→ ParA-Soj-PloopNTPase→                                                                                                                                     | LRR-repeats+AP-GTPase+COR+CASPASE | 1512 | -        | Cyanobacteria       | Nostoc sp. ATCC 53789            | leucine-rich repeat domain-containing protein [Nostoc sp. ATCC 53789].            | GCF_003326245.1 |
| WP_114085638.1 | <-ParA-Soj-PloopNTPase  LRR-repeats+AP-GTPase+COR*→                                                                                                                                                 | LRR-repeats+AP-GTPase+COR         | 881  | -        | Cyanobacteria       | Nostoc sp. ATCC 53789            | hypothetical protein [Nostoc sp. ATCC 53789].                                     | GCF_009873495.1 |
| WP_114460382.1 | Cluster1398_2clades→?→ LRR-repeats+AP-GTPase*→                                                                                                                                                      | LRR-repeats+AP-GTPase             | 477  | -        | Bacteroidetes       | Runella sp. YX9                  | leucine-rich repeat domain-containing protein [Runella sp. YX9].                  | GCF_003339505.1 |
| WP_114694555.1 | SIGMA-HTH→?→  <-?  ?→?→ LRR-repeats+AP-GTPase+COR*→                                                                                                                                                 | LRR-repeats+AP-GTPase+COR         | 865  | -        | Gammaproteobacteria | Motiliproteus coralliicola       | GTP-binding protein [Motiliproteus coralliicola].                                 | GCF_003345655.1 |







| acc                                                                                                                             | operon                                                                                                          | architecture                      | len  | gen.name | taxend              | species                      | define                                                                            | gca             |
|---------------------------------------------------------------------------------------------------------------------------------|-----------------------------------------------------------------------------------------------------------------|-----------------------------------|------|----------|---------------------|------------------------------|-----------------------------------------------------------------------------------|-----------------|
| WP_136836096.1                                                                                                                  | LRR-repeats+AP-GTPase+COR+TIR*→                                                                                 | LRR-repeats+AP-GTPase+COR+TIR     | 1357 | -        | Bacteroidetes       | Pedobacter sp. RP-3-15       | leucine-rich repeat domain-containing protein [Pedobacter sp. RP-3-15].           | GCF_005116445.1 |
| WP_136929189.1                                                                                                                  | SIG+TM+TM+TM+TM+TM+TM+TM+TM+TM→ LRR-repeats+AP-GTPase+COR*→                                                     | LRR-repeats+AP-GTPase+COR         | 961  | -        | Deltaproteobacteria | Polyangium fumosum           | GTP-binding protein [Polyangium fumosum].                                         | GCF_005144585.1 |
| WP_137669597.1                                                                                                                  | LRR-repeats+AP-GTPase+COR*→                                                                                     | LRR-repeats+AP-GTPase+COR         | 272  | -        | Cyanobacteria       | Sphaerospermopsis reniformis | GTP-binding protein, partial [Sphaerospermopsis reniformis].                      | GCF_005402885.1 |
| WP_137686407.1                                                                                                                  | LRR-repeats+AP-GTPase+COR*→                                                                                     | LRR-repeats+AP-GTPase+COR         | 1152 | -        | Chloroflexi         | Thermosporothrix hazakensis  | leucine-rich repeat domain-containing protein [Thermosporothrix hazakensis].      | GCF_005402645.1 |
| WP_137908463.1                                                                                                                  | LRR-repeats+AP-GTPase+COR+TM+TM*→  <-PSE  ?→?→  <-PSE<-?  CCTBP→                                                | LRR-repeats+AP-GTPase+COR+TM+TM   | 875  | -        | Cyanobacteria       | Dolichospermum planctonicum  | leucine-rich repeat domain-containing protein [Dolichospermum planctonicum].      | GCF_005402965.1 |
| WP_138500060.1                                                                                                                  | <-Pkinase+Pentapeptide<-?<-?  PSE→  <-?  LRR-repeats+AP-GTPase+COR+TIR*→  <-?<-?<-PSE  ?→  <-?  ?→?→  <-NUDIX   | LRR-repeats+AP-GTPase+COR+TIR     | 920  | -        | Cyanobacteria       | Nostoc sp. PA-18-2419        | leucine-rich repeat domain-containing protein [Nostoc sp. PA-18-2419].            | GCF_005869855.1 |
| WP_138503290.1                                                                                                                  | <-HhH-RADC+JAB  ?→?→  <-?  LRR-repeats→ LRR-repeats+AP-GTPase+COR*→  <-?  ?→?→  <-PSE<-?  ?→?→ PEP-utilisers-C→ | LRR-repeats+AP-GTPase+COR         | 1100 | -        | Cyanobacteria       | Nostoc sp. PA-18-2419        | leucine-rich repeat domain-containing protein [Nostoc sp. PA-18-2419].            | GCF_005869855.1 |
| WP_138504428.k-ABC-ATPase<-?<-?<-?  ?→ TM+TM+TM→ LRR-repeats+AP-GTPase+COR+TIR*→ PSE→  <-PSE<-?  PSE→?→?→  <-SIG+TM+TM+TM+TM+TM | LRR-repeats+AP-GTPase+COR+TIR                                                                                   | LRR-repeats+AP-GTPase+COR+TIR     | 1019 | -        | Bacteroidetes       | Spirosoma lacussanchae       | TIR domain-containing protein [Spirosoma lacussanchae].                           | GCF_005870035.1 |
| WP_138544765.1                                                                                                                  | LRR-repeats+AP-GTPase+COR+TIR*→  <-?<-?<-TM                                                                     | LRR-repeats+AP-GTPase+COR+TIR     | 1128 | -        | Gammaproteobacteria | Pseudoalteromonas rubra      | leucine-rich repeat domain-containing protein [Pseudoalteromonas rubra].          | GCF_005887115.1 |
| WP_138544832.1                                                                                                                  | <-REC<-?  ?→ LRR-repeats+AP-GTPase+COR+TIR*→                                                                    | LRR-repeats+AP-GTPase+COR+TIR     | 1256 | -        | Gammaproteobacteria | Pseudoalteromonas rubra      | TIR domain-containing protein [Pseudoalteromonas rubra].                          | GCF_005887115.1 |
| WP_138553289.1                                                                                                                  | <-REC<-?  ?→ LRR-repeats+AP-GTPase+COR+TIR*→                                                                    | LRR-repeats+AP-GTPase+COR+TIR     | 1255 | -        | Gammaproteobacteria | Pseudoalteromonas rubra      | TIR domain-containing protein [Pseudoalteromonas rubra].                          | GCF_005887405.1 |
| WP_139281522.1                                                                                                                  | LRR-repeats+AP-GTPase+COR+TIR*→                                                                                 | LRR-repeats+AP-GTPase+COR+TIR     | 850  | -        | Gammaproteobacteria | Vibrio aerogenes             | leucine-rich repeat domain-containing protein, partial [Vibrio aerogenes].        | GCF_900130105.1 |
| WP_139999876.1                                                                                                                  | TM+TM+TM→ LRR-repeats+AP-GTPase+COR+TIR*→                                                                       | LRR-repeats+AP-GTPase+COR+TIR     | 1134 | -        | Bacteroidetes       | Flavobacterium microcysteis  | leucine-rich repeat domain-containing protein [Flavobacterium microcysteis].      | GCF_006385255.1 |
| WP_140058884.1                                                                                                                  | LRR-repeats+AP-GTPase+COR+TIR*→                                                                                 | LRR-repeats+AP-GTPase+COR+TIR     | 1265 | -        | Gammaproteobacteria | Vibrio parahaemolyticus      | TIR domain-containing protein [Vibrio parahaemolyticus].                          | GCF_006376835.1 |
| WP_140063885.1                                                                                                                  | LRR-repeats+AP-GTPase+COR*→                                                                                     | LRR-repeats+AP-GTPase+COR         | 553  | -        | Gammaproteobacteria | Vibrio parahaemolyticus      | hypothetical protein, partial [Vibrio parahaemolyticus].                          | GCF_006377025.1 |
| WP_140305225.1                                                                                                                  | CI→ LRR-repeats+AP-GTPase+COR*→                                                                                 | LRR-repeats+AP-GTPase+COR         | 1113 | -        | Gammaproteobacteria | Vibrio parahaemolyticus      | GTP-binding protein [Vibrio parahaemolyticus].                                    | GCF_006374225.1 |
| WP_140384737.1                                                                                                                  | LRR-repeats+AP-GTPase+COR+TIR*→                                                                                 | LRR-repeats+AP-GTPase+COR+TIR     | 829  | -        | Bacteroidetes       | Elizabethkingia anophelis    | TIR domain-containing protein, partial [Elizabethkingia anophelis].               | GCF_900156995.1 |
| WP_141211867.1                                                                                                                  | LRR-repeats+AP-GTPase+COR+CASPASE*→  <-?  Cluster1731_2clades→?→  <-Cluster2482_2clades                         | LRR-repeats+AP-GTPase+COR+CASPASE | 835  | -        | Cyanobacteria       | Pseudanabaena sp. SR411      | leucine-rich repeat domain-containing protein, partial [Pseudanabaena sp. SR411]. | GCF_002251945.1 |
| WP_141954907.1                                                                                                                  | LRR-repeats+AP-GTPase+COR*→                                                                                     | LRR-repeats+AP-GTPase+COR         | 1074 | -        | Actinobacteria      | Actinoallomurus bryophytorum | hypothetical protein [Actinoallomurus bryophytorum].                              | GCF_006716425.1 |
| WP_142449077.1                                                                                                                  | LRR-repeats+AP-GTPase+COR+TIR*→ TIR→                                                                            | LRR-repeats+AP-GTPase+COR+TIR     | 700  | -        | Bacteroidetes       | Flavobacterium resistens     | leucine-rich repeat domain-containing protein [Flavobacterium resistens].         | GCF_900182645.1 |

| acc            | operon                                                                                                              | architecture                          | len  | gen.name | taxend                    | species                              | define                                                                            | gca             |
|----------------|---------------------------------------------------------------------------------------------------------------------|---------------------------------------|------|----------|---------------------------|--------------------------------------|-----------------------------------------------------------------------------------|-----------------|
| WP_142602418.1 | LRR-repeats+AP-GTPase+COR*→PSE→PSE→  <?  ?→  <?<?<-Cluster2042_2clades                                              | LRR-repeats+AP-GTPase+COR             | 718  | -        | Cyanobacteria             | Pseudanabaena sp. UWO310             | leucine-rich repeat domain-containing protein [Pseudanabaena sp. UWO310].         | GCF_006861605.1 |
| WP_142653260.1 | LRR-repeats→LRR-repeats+AP-GTPase+COR+CASPASE*→?→?→  <?<?<-REC                                                      | LRR-repeats+AP-GTPase+COR+CASPASE     | 1028 | -        | Cyanobacteria             | Pseudanabaena sp. UWO311             | leucine-rich repeat domain-containing protein [Pseudanabaena sp. UWO311].         | GCF_006937785.1 |
| WP_142654307.1 | Cluster54_3clades→?→?→?→LRR-repeats+AP-GTPase+COR+CASPASE*→?→?→  <?<-TPR-repeats+CASPASE<-TPR-repeats+CASPASE       | LRR-repeats+AP-GTPase+COR+CASPASE     | 1096 | -        | Cyanobacteria             | Pseudanabaena sp. UWO311             | leucine-rich repeat domain-containing protein [Pseudanabaena sp. UWO311].         | GCF_006937785.1 |
| WP_142657357.1 | ABC-ATPase→?→?→?→?→Cluster1009_2clades→Cluster53_2clades→LRR-repeats+AP-GTPase+COR*→  <?  ?→?→?→SIG+TM+TM+TM+TM+TM→ | LRR-repeats+AP-GTPase+COR             | 992  | -        | Cyanobacteria             | Pseudanabaena sp. UWO311             | leucine-rich repeat domain-containing protein [Pseudanabaena sp. UWO311].         | GCF_006937785.1 |
| WP_142891598.1 | LRR-repeats+AP-GTPase+COR+DrHyd*→                                                                                   | LRR-repeats+AP-GTPase+COR+DrHyd       | 1516 | -        | Gammaproteobacteria       | Aliikangiella sp. M105               | hypothetical protein [Aliikangiella sp. M105].                                    | GCF_007004725.1 |
| WP_143234350.1 | <-REC<?  ?→LRR-repeats+AP-GTPase+COR+TIR*→                                                                          | LRR-repeats+AP-GTPase+COR+TIR         | 888  | -        | Actinobacteria            | Actinoplanes atraurantiacus          | GTPase [Actinoplanes atraurantiacus].                                             | GCF_900215205.1 |
| WP_143288104.1 | LRR-repeats+AP-GTPase+COR*→  <-SIG+TM+TM+TM+TM                                                                      | LRR-repeats+AP-GTPase+COR             | 716  | -        | Cyanobacteria             | Calothrix rhizosoleniae              | GTP-binding protein, partial [Calothrix rhizosoleniae].                           | GCF_900185595.1 |
| WP_143288141.1 | LRR-repeats+AP-GTPase+COR+TM+TM*→                                                                                   | LRR-repeats+AP-GTPase+COR+TM+TM       | 777  | -        | Cyanobacteria             | Calothrix rhizosoleniae              | leucine-rich repeat domain-containing protein, partial [Calothrix rhizosoleniae]. | GCF_900185595.1 |
| WP_143301191.1 | LRR-repeats+AP-GTPase+COR+DUF4404*→?→  <-RNA-Helicase                                                               | LRR-repeats+AP-GTPase+COR+DUF4404     | 650  | -        | Nitrospinae/Tectomicrobia | Candidatus Entotheonella palauensis  | GTP-binding protein, partial [Candidatus Entotheonella palauensis].               | GCF_900079105.1 |
| WP_143674573.1 | LRR-repeats+AP-GTPase+COR*→                                                                                         | LRR-repeats+AP-GTPase+COR             | 802  | -        | Actinobacteria            | Streptomyces sp. HG99                | hypothetical protein, partial [Streptomyces sp. HG99].                            | GCF_002742045.1 |
| WP_143814854.1 | SIGMA-HTH→?→  <?<?<?<?<?  LRR-repeats+AP-GTPase+COR*→                                                               | LRR-repeats+AP-GTPase+COR             | 861  | -        | Alphaproteobacteria       | Magnetofaba australis                | hypothetical protein [Magnetofaba australis].                                     | GCF_002109495.1 |
| WP_144282986.1 | LRR-repeats+AP-GTPase+COR+TIR*→?→?→?→  <?<?<?<-HISKIN                                                               | LRR-repeats+AP-GTPase+COR+TIR         | 1293 | -        | Bacteroidetes             | Chryseobacterium echinoideorum       | leucine-rich repeat domain-containing protein [Chryseobacterium echinoideorum].   | GCF_007474535.1 |
| WP_144984133.1 | TIR+APATPase+TPR+TPR+TPR→LRR-repeats+AP-GTPase+COR+TM+TM+TM+TM*→                                                    | LRR-repeats+AP-GTPase+COR+TM+TM+TM+TM | 1242 | -        | Planctomycetes            | Gimesia aquarii                      | leucine-rich repeat domain-containing protein [Gimesia aquarii].                  | GCF_007748195.1 |
| WP_145277465.1 | LRR-repeats+AP-GTPase+COR+DUF4404*→                                                                                 | LRR-repeats+AP-GTPase+COR+DUF4404     | 1013 | -        | Planctomycetes            | Planctomycetes bacterium EIP         | leucine-rich repeat domain-containing protein [Planctomycetes bacterium EIP].     | -               |
| WP_145532816.1 | CI→LRR-repeats+AP-GTPase+COR*→                                                                                      | LRR-repeats+AP-GTPase+COR             | 1113 | -        | Gammaproteobacteria       | Vibrio sp. ES.045                    | GTP-binding protein [Vibrio sp. ES.045].                                          | GCF_007827265.1 |
| WP_145988187.1 | <-Classical-AAA<-Trichomonas-DAM  LRR-repeats+AP-GTPase*→  <?<-Cluster1368_2clades<-Cluster2311_2clades             | LRR-repeats+AP-GTPase                 | 621  | -        | Alphaproteobacteria       | Blastochloris tepida                 | leucine-rich repeat domain-containing protein [Blastochloris tepida].             | GCF_003966715.1 |
| WP_146033967.1 | LRR-repeats+AP-GTPase+COR+DUF4404*→                                                                                 | LRR-repeats+AP-GTPase+COR+DUF4404     | 700  | -        | Cyanobacteria             | Nostoc cycadae                       | GTP-binding protein, partial [Nostoc cycadae].                                    | GCF_002897135.1 |
| WP_146129808.1 | LRR-repeats→LRR-repeats+AP-GTPase+COR*→                                                                             | LRR-repeats+AP-GTPase+COR             | 715  | -        | Bacteroidetes             | Muricauda pacifica                   | hypothetical protein [Muricauda pacifica].                                        | GCF_003001695.1 |
| WP_146156812.1 | TPR-repeats→?→SIG+Alba→  <?<?<?<?<?  LRR-repeats+AP-GTPase+COR*→                                                    | LRR-repeats+AP-GTPase+COR             | 857  | -        | Bacteroidetes             | Sphingobacteriales bacterium UPWRP_1 | GTP-binding protein [Sphingobacteriales bacterium UPWRP_1].                       | -               |
| WP_146201360.1 | LRR-repeats+AP-GTPase+COR+TIR*→                                                                                     | LRR-repeats+AP-GTPase+COR+TIR         | 780  | -        | Gammaproteobacteria       | Leucothrix arctica                   | TIR domain-containing protein [Leucothrix arctica].                               | GCF_003172895.1 |

| acc            | operon                                                                                                                                                                                                                        | architecture                       | len  | gen.name | taxend              | species                         | define                                                                           | gca             |
|----------------|-------------------------------------------------------------------------------------------------------------------------------------------------------------------------------------------------------------------------------|------------------------------------|------|----------|---------------------|---------------------------------|----------------------------------------------------------------------------------|-----------------|
| WP_146215520.1 | LRR-repeats+AP-GTPase+COR+TM+TM+TM*→  <-PSE<-?<-?<-?<-?<-Cluster1270_2clades                                                                                                                                                  | LRR-repeats+AP-GTPase+COR+TM+TM+TM | 1504 | -        | Alphaproteobacteria | Hoeflea marina                  | hypothetical protein [Hoeflea marina].                                           | GCF_003182275.1 |
| WP_146505417.1 | LRR-repeats→ LRR-repeats+AP-GTPase+COR*→                                                                                                                                                                                      | LRR-repeats+AP-GTPase+COR          | 795  | -        | Chloroflexi         | Thermosporothrix hazakensis     | GTPase [Thermosporothrix hazakensis].                                            | GCF_003253565.1 |
| WP_146848114.1 | LRR-repeats+AP-GTPase+COR*→                                                                                                                                                                                                   | LRR-repeats+AP-GTPase+COR          | 846  | -        | Bacteroidetes       | Aequorivita antarctica          | hypothetical protein [Aequorivita antarctica].                                   | GCF_007997155.1 |
| WP_146849445.1 | SIG+TM→?→ LRR-repeats+AP-GTPase+COR*→                                                                                                                                                                                         | LRR-repeats+AP-GTPase+COR          | 1099 | -        | Verrucomicrobia     | Brevifollis gellanilyticus      | leucine-rich repeat domain-containing protein [Brevifollis gellanilyticus].      | GCF_007992435.1 |
| WP_146856190.1 | LRR-repeats+AP-GTPase+COR+DUF4404*→                                                                                                                                                                                           | LRR-repeats+AP-GTPase+COR+DUF4404  | 944  | -        | Verrucomicrobia     | Brevifollis gellanilyticus      | leucine-rich repeat domain-containing protein [Brevifollis gellanilyticus].      | GCF_007992435.1 |
| WP_147290429.1 | <-Aminotran_1_2<-?  ?→?→  <-Arginase  ?→ LRR-repeats+AP-GTPase+COR+TIR*→  <-?<-PSE<-?<-?<-?<-?  ?→  <-Cluster1063_3clades<-Cluster1067_3clades                                                                                | LRR-repeats+AP-GTPase+COR+TIR      | 1134 | -        | Alphaproteobacteria | Pannonibacter phragmitetus      | leucine-rich repeat domain-containing protein [Pannonibacter phragmitetus].      | GCF_000382365.1 |
| WP_147864606.1 | LRR-repeats+AP-GTPase+COR+TIR*→                                                                                                                                                                                               | LRR-repeats+AP-GTPase+COR+TIR      | 1297 | -        | Bacteroidetes       | Mesononia sp. K4-1              | leucine-rich repeat domain-containing protein [Mesononia sp. K4-1].              | GCF_008017825.1 |
| WP_148270831.1 | 35exo→  <-?<-?  ?→?→?→ LRR-repeats+AP-GTPase+COR+TIR*→  <-?<-?<-ABC-ATPase+APATPase+ABC-ATPase<-?  SIGMA-HTH→                                                                                                                 | LRR-repeats+AP-GTPase+COR+TIR      | 935  | -        | Bacteroidetes       | Haliscomenobacter hydrossis     | leucine-rich repeat domain-containing protein [Haliscomenobacter hydrossis].     | GCF_000212735.1 |
| WP_148270849.1 | LRR-repeats+AP-GTPase+COR+EAD11*→?→?→?→?→?→ UvsW-A18→                                                                                                                                                                         | LRR-repeats+AP-GTPase+COR+EAD11    | 1113 | -        | Bacteroidetes       | Haliscomenobacter hydrossis     | GTP-binding protein [Haliscomenobacter hydrossis].                               | GCF_000212735.1 |
| WP_148270854.1 | MACRODOMAIN→?→ LRR-repeats+AP-GTPase+COR+EAD11*→                                                                                                                                                                              | LRR-repeats+AP-GTPase+COR+EAD11    | 1041 | -        | Bacteroidetes       | Haliscomenobacter hydrossis     | Miro domain-containing protein [Haliscomenobacter hydrossis].                    | GCF_000212735.1 |
| WP_148705297.1 | <-HhH-RADC+JAB  ?→ NTP_transf_3→ LRR-repeats+AP-GTPase+COR*→                                                                                                                                                                  | LRR-repeats+AP-GTPase+COR          | 1056 | -        | Euryarchaeota       | Methanosarcina siciliae         | leucine-rich repeat domain-containing protein [Methanosarcina siciliae].         | GCF_000970125.1 |
| WP_149986249.1 | SIG+TM+TM+TM+TM+TM+TM+TM+TM→  <-?  Mbetalac→ SAM-methylase→?→  <-?<-SIG+TPM_phosphatase+TM+TM+TM  LRR-repeats+AP-GTPase+COR+TM+TM*→ Cluster1550_2clades→?→?→?→?→  <-Cluster995_2clades  tRNA→ LRR-repeats+AP-GTPase+COR+TIR*→ | LRR-repeats+AP-GTPase+COR+TM+TM    | 829  | -        | Cyanobacteria       | Microcystis aeruginosa          | leucine-rich repeat protein [Microcystis aeruginosa].                            | GCF_008579325.1 |
| WP_150032603.1 | LRR-repeats+AP-GTPase+COR+TIR*→                                                                                                                                                                                               | LRR-repeats+AP-GTPase+COR+TIR      | 1161 | -        | Bacteroidetes       | Taibaiella sp. KVB11            | leucine-rich repeat domain-containing protein [Taibaiella sp. KVB11].            | GCF_008629695.1 |
| WP_150875462.1 | <-ABC-ATPase<-?<-?  ?→?→ LRR-repeats+AP-GTPase+COR+TIR*→                                                                                                                                                                      | LRR-repeats+AP-GTPase+COR+TIR      | 976  | -        | Bacteroidetes       | Larkinella sp. MA1              | leucine-rich repeat domain-containing protein [Larkinella sp. MA1].              | GCF_008727875.1 |
| WP_150977944.1 | CHTH→ LRR-repeats+AP-GTPase+COR+TM+TM*→                                                                                                                                                                                       | LRR-repeats+AP-GTPase+COR+TM+TM    | 796  | -        | Cyanobacteria       | Microcystis aeruginosa          | leucine-rich repeat domain-containing protein [Microcystis aeruginosa].          | GCF_008757435.1 |
| WP_151015117.1 | LRR-repeats+AP-GTPase+COR*→                                                                                                                                                                                                   | LRR-repeats+AP-GTPase+COR          | 946  | -        | Actinobacteria      | Micromonospora aurantiaca       | leucine-rich repeat domain-containing protein [Micromonospora aurantiaca].       | GCF_008806405.1 |
| WP_151968636.1 | LRR-repeats+AP-GTPase+COR*→                                                                                                                                                                                                   | LRR-repeats+AP-GTPase+COR          | 803  | -        | Planctomycetes      | Planctomycetes bacterium SRT547 | leucine-rich repeat domain-containing protein [Planctomycetes bacterium SRT547]. | -               |
| WP_152037914.1 | LRR-repeats+AP-GTPase+COR*→                                                                                                                                                                                                   | LRR-repeats+AP-GTPase+COR          | 919  | -        | Actinobacteria      | Micromonospora sp. B006         | leucine-rich repeat domain-containing protein [Micromonospora sp. B006].         | GCF_003408515.1 |
| WP_152532113.1 | LRR-repeats+AP-GTPase+COR*→                                                                                                                                                                                                   | LRR-repeats+AP-GTPase+COR          | 814  | -        | Cyanobacteria       | Leptolyngbya sp. Heron Island J | leucine-rich repeat domain-containing protein [Leptolyngbya sp. Heron Island J]. | -               |

| acc            | operon                                                                                                                                   | architecture                      | len  | gen.name | taxend              | species                          | define                                                                          | gca             |
|----------------|------------------------------------------------------------------------------------------------------------------------------------------|-----------------------------------|------|----------|---------------------|----------------------------------|---------------------------------------------------------------------------------|-----------------|
| WP_152589868.1 | <-Ferretin<-PSE<-?  ?→  <-Ferredoxin-beta-grasp<-PSE<-?  LRR-repeats+AP-GTPase+COR*→?→?→  <-?  ?→  <-?  PSE→ PSE→ ClpABN-AAA+ClpABC-AAA→ | LRR-repeats+AP-GTPase+COR         | 993  | -        | Cyanobacteria       | Nostoc sphaeroides               | leucine-rich repeat domain-containing protein [Nostoc sphaeroides].             | GCF_009372195.1 |
| WP_152648774.1 | NUDIX→?→?→ LRR-repeats+AP-GTPase+COR*→?→?→  <-?<-?  ?→  <-Cluster2230_2clades                                                            | LRR-repeats+AP-GTPase+COR         | 954  | -        | Actinobacteria      | Streptacidiphilus ammyonensis    | hypothetical protein [Streptacidiphilus ammyonensis].                           | GCF_000787855.1 |
| WP_153009609.1 | <-Cluster1102_3clades<-Cluster1102_3clades  ?→?→?→  <-Cluster5_5clades<-?  LRR-repeats+AP-GTPase+COR*→                                   | LRR-repeats+AP-GTPase+COR         | 997  | -        | Cyanobacteria       | Mastigocoleus testarum           | leucine-rich repeat domain-containing protein [Mastigocoleus testarum].         | GCF_001456025.1 |
| WP_153023587.1 | TM→ LRR-repeats+AP-GTPase+COR*→                                                                                                          | LRR-repeats+AP-GTPase+COR         | 1070 | -        | Actinobacteria      | Glycomyces albidus               | leucine-rich repeat domain-containing protein [Glycomyces albidus].             | -               |
| WP_153228358.1 | <-Cluster5_5clades  LRR-repeats+AP-GTPase+COR+DUF4404*→  <-?<-ABC-ATPase<-?  ?→  <-REC                                                   | LRR-repeats+AP-GTPase+COR+DUF4404 | 992  | -        | Cyanobacteria       | Anabaena sp. YBS01               | leucine-rich repeat domain-containing protein [Anabaena sp. YBS01].             | GCF_009498015.1 |
| WP_153456319.1 | LRR-repeats+AP-GTPase+COR*→                                                                                                              | LRR-repeats+AP-GTPase+COR         | 992  | -        | Actinobacteria      | Streptomyces sp. RB5             | GTPase [Streptomyces sp. RB5].                                                  | -               |
| WP_153661567.1 | <-cNMPBD<-cNMPBD  ?→?→ LRR-repeats+AP-GTPase+COR+TM+TM*→                                                                                 | LRR-repeats+AP-GTPase+COR+TM+TM   | 1103 | -        | Bacteroidetes       | Chitinophaga sp. SYP-B3965       | leucine-rich repeat domain-containing protein [Chitinophaga sp. SYP-B3965].     | GCF_009647655.1 |
| WP_155076197.1 | LRR-repeats+AP-GTPase+COR*→                                                                                                              | LRR-repeats+AP-GTPase+COR         | 899  | -        | Bacteroidetes       | Flavobacterium sp. MC2016-06     | GTP-binding protein [Flavobacterium sp. MC2016-06].                             | GCF_009711165.1 |
| WP_155705093.1 | SIG+Trypsin+PDZ→?→?→ LRR-repeats+AP-GTPase+COR*→                                                                                         | LRR-repeats+AP-GTPase+COR         | 951  | -        | Firmicutes          | Paenibacillus psychroresistens   | GTP-binding protein [Paenibacillus psychroresistens].                           | GCF_009728935.1 |
| WP_155743676.1 | LRR-repeats+AP-GTPase+COR+EAD1*→  <-PSE  Pkinase→ Pkinase→?→?→  <-Cluster5_5clades                                                       | LRR-repeats+AP-GTPase+COR+EAD1    | 1152 | -        | Cyanobacteria       | Scytonema sp. UIC 10036          | leucine-rich repeat domain-containing protein [Scytonema sp. UIC 10036].        | GCF_009725235.1 |
| WP_155746360.1 | LRR-repeats→  <-?<-Cluster5_5clades  LRR-repeats→?→ LRR-repeats+AP-GTPase+COR+EAD1*→?→?→ Cluster5_5clades→                               | LRR-repeats+AP-GTPase+COR+EAD1    | 988  | -        | Cyanobacteria       | Scytonema sp. UIC 10036          | leucine-rich repeat domain-containing protein [Scytonema sp. UIC 10036].        | GCF_009725235.1 |
| WP_156420697.1 | TetR-HTH→?→?→  <-?<-?<-?  LRR-repeats+AP-GTPase+COR+TIR*→                                                                                | LRR-repeats+AP-GTPase+COR+TIR     | 1173 | -        | Alphaproteobacteria | Sphingopyxis sp. HXXIV           | TIR domain-containing protein [Sphingopyxis sp. HXXIV].                         | GCF_001468305.1 |
| WP_157205648.1 | Cluster5_5clades→?→?→ HTH→ LRR-repeats+AP-GTPase+COR+TIR*→ Cluster1019_2clades→?→?→  <-?<-?<-?  Cluster833_2clades→                      | LRR-repeats+AP-GTPase+COR+TIR     | 1096 | -        | Gammaproteobacteria | Methylomonas koyamae             | TIR domain-containing protein [Methylomonas koyamae].                           | GCF_001644135.1 |
| WP_157310052.1 | LRR-repeats+AP-GTPase+COR+TIR*→                                                                                                          | LRR-repeats+AP-GTPase+COR+TIR     | 917  | -        | Bacteroidetes       | Chitinophaga sp. ysch24          | leucine-rich repeat protein [Chitinophaga sp. ysch24].                          | GCF_009758205.1 |
| WP_157453024.1 | LRR-repeats+AP-GTPase+COR+DUF4404*→                                                                                                      | LRR-repeats+AP-GTPase+COR+DUF4404 | 1156 | -        | Cyanobacteria       | Coleofasciculus chthonoplastes   | leucine-rich repeat domain-containing protein [Coleofasciculus chthonoplastes]. | -               |
| WP_157546628.1 | <-SIG+TM+TM+TM+TM+TM+TM+TM+TM  ?→?→?→  <-?  ?→?→ LRR-repeats+AP-GTPase+COR*→                                                             | LRR-repeats+AP-GTPase+COR         | 585  | -        | Actinobacteria      | Hamadaea tsunoensis              | leucine-rich repeat domain-containing protein [Hamadaea tsunoensis].            | GCF_000428945.1 |
| WP_157584649.1 | LRR-repeats+AP-GTPase+COR+TIR*→  <-?  ABC_membrane+ABC_tran→                                                                             | LRR-repeats+AP-GTPase+COR+TIR     | 937  | -        | Bacteroidetes       | Spirosoma sp. HMF4905            | leucine-rich repeat domain-containing protein [Spirosoma sp. HMF4905].          | GCF_009754945.1 |
| WP_157585892.1 | LRR-repeats+AP-GTPase+COR+TIR*→ Cluster1510_2clades→                                                                                     | LRR-repeats+AP-GTPase+COR+TIR     | 1129 | -        | Bacteroidetes       | Spirosoma sp. HMF4905            | leucine-rich repeat domain-containing protein [Spirosoma sp. HMF4905].          | -               |
| WP_157590734.1 | ABhydrolase+ABhydrolase+CASPASE+TPR-S→  <-?  LRR-repeats+AP-GTPase+COR+TIR*→                                                             | LRR-repeats+AP-GTPase+COR+TIR     | 1169 | -        | Bacteroidetes       | Spirosoma sp. HMF4905            | leucine-rich repeat domain-containing protein [Spirosoma sp. HMF4905].          | GCF_009754945.1 |
| WP_157879249.1 | LRR-repeats+AP-GTPase+COR+TIR*→  <-PSE<-?<-?<-?<-?<-?<-REC                                                                               | LRR-repeats+AP-GTPase+COR+TIR     | 656  | -        | Alphaproteobacteria | Pararhodospirillum photometricum | hypothetical protein [Pararhodospirillum photometricum].                        | GCF_000284415.1 |





| acc            | operon                                                                                                                       | architecture                      | len  | gen.name | taxend              | species                                  | define                                                                                             | gca             |
|----------------|------------------------------------------------------------------------------------------------------------------------------|-----------------------------------|------|----------|---------------------|------------------------------------------|----------------------------------------------------------------------------------------------------|-----------------|
| WP_159789529.1 | <-Cluster1921_2clades<-?<-?  ?<-?  ?<-?> LRR-repeats+AP-GTPase+COR*->?>  <-?<-REC                                            | LRR-repeats+AP-GTPase+COR         | 771  | -        | Cyanobacteria       | Microcoleus sp. IPPAS B-353              | leucine-rich repeat domain-containing protein [Microcoleus sp. IPPAS B-353].                       | GCF_009846485.1 |
| WP_160075537.1 | LRR-repeats+AP-GTPase+COR+TIR*->                                                                                             | LRR-repeats+AP-GTPase+COR+TIR     | 1088 | -        | Bacteroidetes       | Saprosirales bacterium GYS_P2D           | leucine-rich repeat domain-containing protein [Saprosirales bacterium GYS_P2D].                    | -               |
| WP_160131147.1 | SIGMA-HTH->?> RADICAL-SAM-> LRR-repeats+AP-GTPase+COR+TIR*->  <-REC<-?<-?<-?  ?> HISKIN->                                    | LRR-repeats+AP-GTPase+COR+TIR     | 1229 | -        | Bacteroidetes       | Kordia antarctica                        | leucine-rich repeat domain-containing protein [Kordia antarctica].                                 | GCF_009901525.1 |
| WP_160148531.1 | <-SIG+Trypsin+PDZ<-?<-?<-?  ?<-?> LRR-repeats+AP-GTPase+COR+TCAD2*->                                                         | LRR-repeats+AP-GTPase+COR+TCAD2   | 919  | -        | Cyanobacteria       | Leptolyngbya sp. PCC 7376                | leucine-rich repeat domain-containing protein [Leptolyngbya sp. PCC 7376].                         | GCF_000316605.1 |
| WP_161144175.1 | Cluster1913_2clades->?>?>?>?> LRR-repeats+AP-GTPase*->                                                                       | LRR-repeats+AP-GTPase             | 512  | -        | Firmicutes          | Dorea sp. BIOML-A1                       | hypothetical protein [Dorea sp. BIOML-A1].                                                         | GCF_009875615.1 |
| WP_161213661.1 | LRR-repeats+AP-GTPase+COR*->  <-NUDIX                                                                                        | LRR-repeats+AP-GTPase+COR         | 1340 | -        | Actinobacteria      | unclassified Streptomyces                | MULTISPECIES: leucine-rich repeat domain-containing protein [unclassified Streptomyces].           | GCF_900091775.1 |
| WP_161967152.1 | <-Aminotran_1_2<-?  LRR-repeats+AP-GTPase+COR+TIR*->  <-?<-?<-?<-DSBH+AraC-HTH+AraC-HTH                                      | LRR-repeats+AP-GTPase+COR+TIR     | 1219 | -        | Planctomycetes      | Fimbrioglobus ruber                      | hypothetical protein [Fimbrioglobus ruber].                                                        | GCF_002197845.1 |
| WP_161967198.1 | <-RelE-ParE<-?  ?<-?> LRR-repeats->  <-?  LRR-repeats+AP-GTPase+COR*->                                                       | LRR-repeats+AP-GTPase+COR         | 915  | -        | Planctomycetes      | Fimbrioglobus ruber                      | leucine-rich repeat domain-containing protein [Fimbrioglobus ruber].                               | GCF_002197845.1 |
| WP_162292932.1 | LRR-repeats+AP-GTPase+COR*->?>?>?>  <-?<-ABC-ATPase+ABC-ATPase                                                               | LRR-repeats+AP-GTPase+COR         | 1975 | -        | Actinobacteria      | Actinophytocola xinjiangensis            | leucine-rich repeat domain-containing protein [Actinophytocola xinjiangensis].                     | GCF_001921215.1 |
| WP_162399370.1 | LRR-repeats+AP-GTPase+COR*->?>  <-?  ?>  <-?<-?  ?> ClpABN-AAA+ClpABC-AAA->                                                  | LRR-repeats+AP-GTPase+COR         | 895  | -        | Cyanobacteria       | Nostoc sp. B(2019)                       | leucine-rich repeat domain-containing protein, partial [Nostoc sp. B(2019)].                       | GCF_010091925.1 |
| WP_162488066.1 | TM+TM->?>  <-?  ?> PSE->  <-?  ?>?> LRR-repeats+AP-GTPase+COR+TIR*->  <-?<-?  ABC_membrane+ABC_tran->?> Cluster968_2clades-> | LRR-repeats+AP-GTPase+COR+TIR     | 1120 | -        | Alphaproteobacteria | Azospirillum lipoferum                   | TIR domain-containing protein [Azospirillum lipoferum].                                            | GCF_000283655.1 |
| WP_162528069.1 | LRR-repeats+AP-GTPase+COR*->                                                                                                 | LRR-repeats+AP-GTPase+COR         | 781  | -        | Alphaproteobacteria | Rhodobacterales bacterium                | leucine-rich repeat domain-containing protein [Rhodobacterales bacterium].                         | -               |
| WP_162667694.1 | <-Cluster1291_2clades<-?<-PSE<-?  ?<-?>?> LRR-repeats+AP-GTPase*->?>  <-?  ?<-?>?> ParB->                                    | LRR-repeats+AP-GTPase             | 617  | -        | Planctomycetes      | Gemmata massiliana                       | hypothetical protein [Gemmata massiliana].                                                         | GCF_901538265.1 |
| WP_162668063.1 | LRR-repeats+AP-GTPase+COR+DUF4404*->  <-?<-?<-?  ?>  <-LRR-repeats  REC->                                                    | LRR-repeats+AP-GTPase+COR+DUF4404 | 978  | -        | Planctomycetes      | Gemmata massiliana                       | leucine-rich repeat domain-containing protein [Gemmata massiliana].                                | GCF_901538265.1 |
| WP_163431087.1 | TIR-> LRR-repeats+AP-GTPase+COR+TIR*-> PSE->?>?>  <-?<-SIG+TM+TM+TM+HISKIN                                                   | LRR-repeats+AP-GTPase+COR+TIR     | 1384 | -        | Bacteroidetes       | unclassified Flavobacterium              | MULTISPECIES: leucine-rich repeat domain-containing protein [unclassified Flavobacterium].         | GCF_013874595.1 |
| WP_163660644.1 | LRR-repeats+AP-GTPase*->                                                                                                     | LRR-repeats+AP-GTPase             | 311  | -        | Cyanobacteria       | Leptolyngbyaceae cyanobacterium CCMR0082 | leucine-rich repeat domain-containing protein [Leptolyngbyaceae cyanobacterium CCMR0082].          | -               |
| WP_163671600.1 | LRR-repeats+AP-GTPase+COR+TIR*->                                                                                             | LRR-repeats+AP-GTPase+COR+TIR     | 855  | -        | Cyanobacteria       | Leptolyngbyaceae cyanobacterium CCMR0082 | leucine-rich repeat domain-containing protein, partial [Leptolyngbyaceae cyanobacterium CCMR0082]. | -               |



| acc            | operon                                                                                                                | architecture                      | len  | gen.name | taxend         | species                       | define                                                                        | gca             |
|----------------|-----------------------------------------------------------------------------------------------------------------------|-----------------------------------|------|----------|----------------|-------------------------------|-------------------------------------------------------------------------------|-----------------|
| WP_167211330.1 | LRR-repeats+AP-GTPase+COR+TIR*→ TIR→                                                                                  | LRR-repeats+AP-GTPase+COR+TIR     | 1843 | -        | Bacteroidetes  | Spirosoma aureum              | leucine-rich repeat domain-containing protein [Spirosoma aureum].             | GCF_011604685.1 |
| WP_167291529.1 | LRR-repeats+AP-GTPase+COR+TIR*→                                                                                       | LRR-repeats+AP-GTPase+COR+TIR     | 1060 | -        | Bacteroidetes  | Paraflavitale devenefica      | leucine-rich repeat domain-containing protein [Paraflavitale devenefica].     | GCF_011759375.1 |
| WP_167387879.1 | LRR-repeats+AP-GTPase+COR*→                                                                                           | LRR-repeats+AP-GTPase+COR         | 967  | -        | Actinobacteria | Streptomyces recifensis       | GTPase [Streptomyces recifensis].                                             | GCF_002154615.1 |
| WP_168204481.1 | LRR-repeats→ LRR-repeats+AP-GTPase+COR+TM+TM*→                                                                        | LRR-repeats+AP-GTPase+COR+TM+TM   | 574  | -        | Cyanobacteria  | Dolichospermum sp. UHCC 0315A | hypothetical protein [Dolichospermum sp. UHCC 0315A].                         | GCF_008121535.1 |
| WP_168218871.1 | LRR-repeats+AP-GTPase+COR*→?→?→  <-?<-?<-?<-?<-PIN                                                                    | LRR-repeats+AP-GTPase+COR         | 864  | -        | Planctomycetes | Limnoglobus roseus            | leucine-rich repeat domain-containing protein [Limnoglobus roseus].           | GCF_008254045.1 |
| WP_168359257.1 | LRR-repeats+AP-GTPase+COR+TM+TM*→                                                                                     | LRR-repeats+AP-GTPase+COR+TM+TM   | 687  | -        | Cyanobacteria  | Dolichospermum planctonicum   | GTP-binding protein, partial [Dolichospermum planctonicum].                   | GCF_009712075.1 |
| WP_168360389.1 | Ferredoxin-betagrasp→?→?→ LRR-repeats→ LRR-repeats+AP-GTPase+COR*→                                                    | LRR-repeats+AP-GTPase+COR         | 682  | -        | Cyanobacteria  | Dolichospermum planctonicum   | hypothetical protein, partial [Dolichospermum planctonicum].                  | GCF_009712075.1 |
| WP_168467214.1 | LRR-repeats+AP-GTPase+COR*→ PSE→?→  <-?  ?→?→?→  <-Pentapeptide                                                       | LRR-repeats+AP-GTPase+COR         | 692  | -        | Cyanobacteria  | Aphanizomenon sp. UHCC 0183   | GTP-binding protein, partial [Aphanizomenon sp. UHCC 0183].                   | GCF_009712065.1 |
| WP_168493001.1 | <-HNH<-?  ?→ LRR-repeats+AP-GTPase+COR*→                                                                              | LRR-repeats+AP-GTPase+COR         | 1079 | -        | Cyanobacteria  | Anabaena sp. UHCC 0204        | leucine-rich repeat domain-containing protein [Anabaena sp. UHCC 0204].       | GCF_009711975.1 |
| WP_168511191.1 | NUDIX→?→?→?→ LRR-repeats+AP-GTPase+COR*→                                                                              | LRR-repeats+AP-GTPase+COR         | 1365 | -        | Actinobacteria | Streptomyces sp. S1D4-11      | leucine-rich repeat domain-containing protein [Streptomyces sp. S1D4-11].     | -               |
| WP_168644108.1 | LRR-repeats+AP-GTPase+COR+TIR*→?→  <-?<-SIG+NUDIX                                                                     | LRR-repeats+AP-GTPase+COR+TIR     | 963  | -        | Cyanobacteria  | Dolichospermum sp. UHCC 0259  | leucine-rich repeat domain-containing protein [Dolichospermum sp. UHCC 0259]. | GCF_009711935.1 |
| WP_169190548.1 | <-ABC-ATPase<-?<-?<-?<-?  ?→ tRNA→?→ LRR-repeats+AP-GTPase+COR+TIR*→                                                  | LRR-repeats+AP-GTPase+COR+TIR     | 1190 | -        | Bacteroidetes  | Chitinophaga sp. Ak27         | leucine-rich repeat domain-containing protein [Chitinophaga sp. Ak27].        | GCF_012726295.1 |
| WP_169266449.1 | LRR-repeats+AP-GTPase+COR+TIR*→  <-?  ?→  <-?  NUDIX→                                                                 | LRR-repeats+AP-GTPase+COR+TIR     | 936  | -        | Cyanobacteria  | Brasilonema octagenarum       | leucine-rich repeat domain-containing protein [Brasilonema octagenarum].      | GCF_012912125.1 |
| WP_169315756.1 | LRR-repeats+AP-GTPase+COR+TIR*→                                                                                       | LRR-repeats+AP-GTPase+COR+TIR     | 1002 | -        | Bacteroidetes  | Haliscomenobacter hydrossis   | leucine-rich repeat domain-containing protein [Haliscomenobacter hydrossis].  | GCF_000212735.1 |
| WP_169363874.1 | SIG+HIN-HTH→?→?→ LRR-repeats+AP-GTPase+COR+TM+TM*→                                                                    | LRR-repeats+AP-GTPase+COR+TM+TM   | 972  | -        | Cyanobacteria  | Pseudanabaena yagii           | leucine-rich repeat domain-containing protein [Pseudanabaena yagii].          | GCF_012863495.1 |
| WP_169364911.1 | TPR-repeats+CASPASE→?→ PSE→ Cluster54_3clades→ Cluster53_2clades→?→ LRR-repeats+AP-GTPase+COR+CASPASE*→  <-?  ?→ REC→ | LRR-repeats+AP-GTPase+COR+CASPASE | 1239 | -        | Cyanobacteria  | Pseudanabaena yagii           | leucine-rich repeat domain-containing protein [Pseudanabaena yagii].          | GCF_012863495.1 |
| WP_169365210.1 | Pentapeptide-repeats→?→ PolB→?→ LRR-repeats→ LRR-repeats+AP-GTPase+COR*→?→?→  <-?  ?→?→  <-SIG+TM+TM+TM+TM+TM         | LRR-repeats+AP-GTPase+COR         | 682  | -        | Cyanobacteria  | Pseudanabaena yagii           | hypothetical protein [Pseudanabaena yagii].                                   | GCF_012863495.1 |
| WP_169482131.1 | LRR-repeats+AP-GTPase+COR*→  <-?  ?→  <-?<-?<-?<-?<-Cluster1745_2clades                                               | LRR-repeats+AP-GTPase+COR         | 965  | -        | Firmicutes     | Paenibacillus sp. SZ31        | GTP-binding protein [Paenibacillus sp. SZ31].                                 | GCF_012912005.1 |
| WP_169551474.1 | LRR-repeats+AP-GTPase+COR+DrHyd*→  <-?  ?→?→  <-TPR-repeats                                                           | LRR-repeats+AP-GTPase+COR+DrHyd   | 1047 | -        | Bacteroidetes  | Spirosoma sp. CJU-R4          | hypothetical protein [Spirosoma sp. CJU-R4].                                  | GCF_012849055.1 |
| WP_169617268.1 | RelE→ CHTH→?→  <-?<-?<-?<-?  LRR-repeats+AP-GTPase+COR+TIR*→?→  <-?<-?  ?→?→  <-?<-RelE-ParE                          | LRR-repeats+AP-GTPase+COR+TIR     | 1174 | -        | Cyanobacteria  | Nodosilinea sp. P-1105        | leucine-rich repeat domain-containing protein [Nodosilinea sp. P-1105].       | GCF_012911975.1 |



| acc            | operon                                                                                                                  | architecture                      | len  | gen.name | taxend              | species                      | define                                                                           | gca             |
|----------------|-------------------------------------------------------------------------------------------------------------------------|-----------------------------------|------|----------|---------------------|------------------------------|----------------------------------------------------------------------------------|-----------------|
| WP_172187602.1 | Chromo-N+CHROMO→  <-RelE-ParE<-?  ?→ LRR-repeats+AP-GTPase+COR*→?→ SIG+TM+TM+TM+TM+TM+TM+TM+TM+TM+TM+TM+TM→             | LRR-repeats+AP-GTPase+COR         | 913  | -        | Cyanobacteria       | Microcoleus sp. IPMA8        | leucine-rich repeat domain-containing protein [Microcoleus sp. IPMA8].           | GCF_013179805.1 |
| WP_172195227.1 | LRR-repeats+AP-GTPase+COR+TIR*→  <-?  ?→  <-?  NUDIX→?→  <-Arginase                                                     | LRR-repeats+AP-GTPase+COR+TIR     | 1029 | -        | Cyanobacteria       | Brasilonema sennae           | leucine-rich repeat domain-containing protein [Brasilonema sennae].              | GCF_006968745.1 |
| WP_172195319.1 | <-SIG+TM+TM+Calceineurin  ?→?→?→ LRR-repeats+AP-GTPase+COR+TIR*→                                                        | LRR-repeats+AP-GTPase+COR+TIR     | 1330 | -        | Cyanobacteria       | Brasilonema sennae           | leucine-rich repeat domain-containing protein [Brasilonema sennae].              | GCF_006968745.1 |
| WP_172621632.1 | LRR-repeats+AP-GTPase+COR+TIR*→  <-?  ?→?→?→?→  <-?  cNMPBD→                                                            | LRR-repeats+AP-GTPase+COR+TIR     | 975  | -        | Bacteroidetes       | Chitinophaga pinensis        | TIR domain-containing protein [Chitinophaga pinensis].                           | GCF_902167305.1 |
| WP_172622229.1 | LRR-repeats+AP-GTPase+COR+TIR*→  <-?  ?→?→?→?→  <-?  cNMPBD→                                                            | LRR-repeats+AP-GTPase+COR+TIR     | 975  | -        | Bacteroidetes       | Chitinophaga pinensis        | TIR domain-containing protein [Chitinophaga pinensis].                           | GCF_902167325.1 |
| WP_172632369.1 | REC→ LRR-repeats+AP-GTPase+COR*→                                                                                        | LRR-repeats+AP-GTPase+COR         | 1102 | -        | Chloroflexi         | Dictyobacter sp. Uno17       | leucine-rich repeat domain-containing protein [Dictyobacter sp. Uno17].          | GCF_008326305.1 |
| WP_173012781.1 | LRR-repeats+AP-GTPase+COR+TIR*→  <-ParB<-ParA-Soj-PloopNTPase                                                           | LRR-repeats+AP-GTPase+COR+TIR     | 751  | -        | Alphaproteobacteria | Niveispirillum sp. SYP-B3756 | TIR domain-containing protein [Niveispirillum sp. SYP-B3756].                    | GCF_009495745.1 |
| WP_173037887.1 | <-SIG+TM<-?<-ABC-ATPase  ?→?→?→?→ LRR-repeats+AP-GTPase+COR*→                                                           | LRR-repeats+AP-GTPase+COR         | 981  | -        | Actinobacteria      | Phytohabitans flavus         | hypothetical protein [Phytohabitans flavus].                                     | GCF_011764545.1 |
| WP_173124261.1 | Cluster1612_2clades→?→?→  <-?<-?  LRR-repeats+AP-GTPase+COR*→                                                           | LRR-repeats+AP-GTPase+COR         | 1244 | -        | Actinobacteria      | Kibdelosporangium persicum   | leucine-rich repeat domain-containing protein [Kibdelosporangium persicum].      | GCF_013280595.1 |
| WP_173803276.1 | LRR-repeats+AP-GTPase+COR+TIR*→  <-?<-ABC_membrane+ABC_tran  Cyanophycinsyn-ATPgrasp→ Cyanophycinsyn-ATPgrasp→          | LRR-repeats+AP-GTPase+COR+TIR     | 794  | -        | Betaproteobacteria  | Leptothrix sp. C29           | TIR domain-containing protein, partial [Leptothrix sp. C29].                     | GCF_013294065.1 |
| WP_174565117.1 | LRR-repeats+AP-GTPase*→                                                                                                 | LRR-repeats+AP-GTPase             | 485  | -        | Bacteroidetes       | Flavobacterium sp. A45       | leucine-rich repeat domain-containing protein, partial [Flavobacterium sp. A45]. | GCF_002001005.1 |
| WP_174708182.1 | PAS+HISKIN→ REC→?→?→ LRR-repeats+AP-GTPase+COR+DUF4404*→  <-?  ?→?→ ABC_membrane+ABC_tran→ ABC_membrane+ABC_tran→       | LRR-repeats+AP-GTPase+COR+DUF4404 | 1122 | -        | Cyanobacteria       | Nostoc sp. TCL240-02         | leucine-rich repeat domain-containing protein [Nostoc sp. TCL240-02].            | GCF_013343235.1 |
| WP_174708278.1 | ABhydrolase→?→  <-?  LRR-repeats→ PSE→ LRR-repeats+AP-GTPase+COR+TIR*→?→  <-?<-SIG+NUDIX                                | LRR-repeats+AP-GTPase+COR+TIR     | 919  | -        | Cyanobacteria       | Nostoc sp. TCL240-02         | leucine-rich repeat domain-containing protein [Nostoc sp. TCL240-02].            | GCF_013343235.1 |
| WP_174709624.1 | <-Arginase<-?  LRR-repeats+AP-GTPase+COR+TIR→ LRR-repeats+AP-GTPase+COR+TIR→?→  <-ABC-ATPase                            | LRR-repeats+AP-GTPase+COR+TIR     | 1126 | -        | Cyanobacteria       | Nostoc sp. TCL240-02         | leucine-rich repeat domain-containing protein [Nostoc sp. TCL240-02].            | GCF_013343235.1 |
| WP_174709625.1 | LRR-repeats+AP-GTPase+COR+TIR*→                                                                                         | LRR-repeats+AP-GTPase+COR+TIR     | 1123 | -        | Cyanobacteria       | Nostoc sp. TCL240-02         | leucine-rich repeat domain-containing protein [Nostoc sp. TCL240-02].            | GCF_013343235.1 |
| WP_174711091.1 | LRR-repeats+AP-GTPase+COR*→                                                                                             | LRR-repeats+AP-GTPase+COR         | 1189 | -        | Cyanobacteria       | Nostoc sp. TCL240-02         | leucine-rich repeat domain-containing protein [Nostoc sp. TCL240-02].            | GCF_013343235.1 |
| WP_174712042.1 | LRR-repeats+AP-GTPase+COR*→?→  <-?  ?→  <-?  ?→ ClpABN-AAA+ClpABC-AAA→                                                  | LRR-repeats+AP-GTPase+COR         | 967  | -        | Cyanobacteria       | Nostoc sp. TCL240-02         | leucine-rich repeat domain-containing protein [Nostoc sp. TCL240-02].            | GCF_013343235.1 |
| WP_175357678.1 | Cluster54_3clades→?→ RelE-ParE→ Cluster53_2clades→?→ LRR-repeats+AP-GTPase+COR*→?→?→?→  <-?  ?→  <-Pentapeptide-repeats | LRR-repeats+AP-GTPase+COR         | 928  | -        | Cyanobacteria       | Pseudanabaena biceps         | leucine-rich repeat domain-containing protein [Pseudanabaena biceps].            | GCF_013361095.1 |
| WP_175471885.1 | Mbetalac→?→ LRR-repeats+AP-GTPase+COR*→  <-?<-ICLR-HTH  ?→?→?→ ABhydrolase→                                             | LRR-repeats+AP-GTPase+COR         | 886  | -        | Actinobacteria      | Geodermatophilus telluris    | hypothetical protein [Geodermatophilus telluris].                                | GCF_900102745.1 |







| acc            | operon                                                                                                                                        | architecture                      | len  | gen.name | taxend         | species                       | define                                                                             | gca             |
|----------------|-----------------------------------------------------------------------------------------------------------------------------------------------|-----------------------------------|------|----------|----------------|-------------------------------|------------------------------------------------------------------------------------|-----------------|
| WP_184831163.1 | SIG+TM+TM+TM+TM+TM+TM->  <?  ?->?->?->?-> PSE->                                                                                               | LRR-repeats+AP-GTPase+COR         | 802  | -        | Actinobacteria | Allocatelliglobospora scoriae | hypothetical protein [Allocatelliglobospora scoriae].                              | GCF_014204945.1 |
| WP_184846103.1 | LRR-repeats+AP-GTPase+COR*->  <?<?  wHTH-4stranded+TPRs+APATPase+TPR-repeats-><br>LRR-repeats+AP-GTPase+COR*->  <?<?<?<-BACTERIALFRINGE+TM+TM | LRR-repeats+AP-GTPase+COR         | 1247 | -        | Actinobacteria | Allocatelliglobospora scoriae | leucine-rich repeat domain-containing protein [Allocatelliglobospora scoriae].     | GCF_014204945.1 |
| WP_184892074.1 | LRR-repeats+AP-GTPase+COR*->?->?-> REC-> HISKIN->                                                                                             | LRR-repeats+AP-GTPase+COR         | 1463 | -        | Actinobacteria | Streptomyces scabiei          | leucine-rich repeat domain-containing protein [Streptomyces scabiei].              | GCF_014203845.1 |
| WP_184930759.1 | LRR-repeats+AP-GTPase+COR*->                                                                                                                  | LRR-repeats+AP-GTPase+COR         | 954  | -        | Actinobacteria | Streptomyces sp. SFB5A        | hypothetical protein [Streptomyces sp. SFB5A].                                     | GCF_014203895.1 |
| WP_184953474.1 | GNTR-HTH->  <?  REC-> REC->?-> LRR-repeats+AP-GTPase+COR+TIR*->  <-35exo                                                                      | LRR-repeats+AP-GTPase+COR+TIR     | 1043 | -        | Actinobacteria | Actinoplanes abujensis        | TIR domain-containing protein [Actinoplanes abujensis].                            | GCF_016861995.1 |
| WP_185097769.1 | LRR-repeats+AP-GTPase+COR*->                                                                                                                  | LRR-repeats+AP-GTPase+COR         | 901  | -        | Bacteroidetes  | Elizabethkingia anophelis     | leucine-rich repeat domain-containing protein [Elizabethkingia anophelis].         | GCF_001703835.1 |
| WP_185204695.1 | Cluster1364_2clades->?->?->?->?->?-> LRR-repeats+AP-GTPase+COR*->  <-Cyanophycinsyn-ATPgrasp                                                  | LRR-repeats+AP-GTPase+COR         | 1038 | -        | Bacteroidetes  | Chryseobacterium sp. C3       | leucine-rich repeat protein [Chryseobacterium sp. C3].                             | GCF_014218905.1 |
| WP_185236942.1 | LRR-repeats+AP-GTPase+COR+TM+TM*->                                                                                                            | LRR-repeats+AP-GTPase+COR+TM+TM   | 828  | -        | Cyanobacteria  | Microcystis aeruginosa        | leucine-rich repeat protein [Microcystis aeruginosa].                              | GCF_014218745.1 |
| WP_185240111.1 | SAM-methylase->?->  <?<-SIG+TPM_phosphatase+TM+TM+TM  LRR-repeats+AP-GTPase+COR+TM+TM*->  <?<-?<-?<?  ?->  <-Pro_CA                           | LRR-repeats+AP-GTPase+COR+TM+TM   | 874  | -        | Cyanobacteria  | Microcystis aeruginosa        | leucine-rich repeat protein [Microcystis aeruginosa].                              | GCF_014218765.1 |
| WP_185478866.1 | <-Cluster5_5clades  LRR-repeats+AP-GTPase+COR+DUF4404*->                                                                                      | LRR-repeats+AP-GTPase+COR+DUF4404 | 1084 | -        | Cyanobacteria  | Trichormus variabilis         | leucine-rich repeat domain-containing protein [Trichormus variabilis].             | GCF_014222125.1 |
| WP_185479669.1 | LRR-repeats+AP-GTPase+COR+DUF4404*->  <-?<-ABC-ATPase<-?  ?->  <-REC                                                                          | LRR-repeats+AP-GTPase+COR+DUF4404 | 866  | -        | Cyanobacteria  | Trichormus variabilis         | leucine-rich repeat domain-containing protein, partial [Trichormus variabilis].    | GCF_014222155.1 |
| WP_185482851.1 | <-Cluster5_5clades  LRR-repeats+AP-GTPase+COR+DUF4404*->  <-?<-ABC-ATPase<-?  ?->  <-REC                                                      | LRR-repeats+AP-GTPase+COR+DUF4404 | 1084 | -        | Cyanobacteria  | Trichormus variabilis         | leucine-rich repeat domain-containing protein [Trichormus variabilis].             | GCF_014222225.1 |
| WP_185499823.1 | <-Cluster5_5clades  LRR-repeats+AP-GTPase+COR+DUF4404*->  <-?<-ABC-ATPase<-?  ?->  <-REC                                                      | LRR-repeats+AP-GTPase+COR+DUF4404 | 1199 | -        | Cyanobacteria  | Trichormus variabilis         | leucine-rich repeat domain-containing protein [Trichormus variabilis].             | GCF_014222145.1 |
| WP_185505742.1 | <-Cluster5_5clades  LRR-repeats+AP-GTPase+COR+DUF4404*->  <-?<-ABC-ATPase<-?  ?->  <-REC                                                      | LRR-repeats+AP-GTPase+COR+DUF4404 | 992  | -        | Cyanobacteria  | Trichormus variabilis         | leucine-rich repeat domain-containing protein [Trichormus variabilis].             | GCF_014222245.1 |
| WP_185539469.1 | LRR-repeats+AP-GTPase+COR+DUF4404*->  <-?<-ABC-ATPase<-?  ?->  <-REC                                                                          | LRR-repeats+AP-GTPase+COR+DUF4404 | 895  | -        | Cyanobacteria  | Trichormus variabilis         | leucine-rich repeat domain-containing protein, partial [Trichormus variabilis].    | GCF_014222135.1 |
| WP_185567106.1 | LRR-repeats+AP-GTPase+COR+TM+TM*->  <-CASPASE+TM                                                                                              | LRR-repeats+AP-GTPase+COR+TM+TM   | 862  | -        | Cyanobacteria  | Nostoc sp. 2RC                | leucine-rich repeat domain-containing protein [Nostoc sp. 2RC].                    | GCF_014222165.1 |
| WP_185570121.1 | PIN-> LRR-repeats+AP-GTPase+COR+TIR*->                                                                                                        | LRR-repeats+AP-GTPase+COR+TIR     | 1020 | -        | Cyanobacteria  | Nostoc sp. 2RC                | leucine-rich repeat domain-containing protein [Nostoc sp. 2RC].                    | GCF_014222165.1 |
| WP_185579937.1 | ABhydrolase->?->  <-?  COR+TIR-> LRR-repeats+AP-GTPase+COR+TIR*->?->  <-PIN<-?<-?<-SIG+NUDIX                                                  | LRR-repeats+AP-GTPase+COR+TIR     | 1003 | -        | Cyanobacteria  | unclassified Nostoc           | MULTISPECIES: leucine-rich repeat domain-containing protein [unclassified Nostoc]. | GCF_014222255.1 |
| WP_185580380.1 | Cluster5_5clades-> LRR-repeats+AP-GTPase+COR+TIR*->  <-CASPASE+TM                                                                             | LRR-repeats+AP-GTPase+COR+TIR     | 893  | -        | Cyanobacteria  | unclassified Nostoc           | MULTISPECIES: leucine-rich repeat domain-containing protein [unclassified Nostoc]. | GCF_014222255.1 |

| acc            | operon                                                                                                                  | architecture                      | len  | gen.name | taxend              | species                 | define                                                                      | gca             |
|----------------|-------------------------------------------------------------------------------------------------------------------------|-----------------------------------|------|----------|---------------------|-------------------------|-----------------------------------------------------------------------------|-----------------|
| WP_185583983.1 | <-PIN<-?<-?  ?→?→  <-Arginase<-?  LRR-repeats+AP-GTPase+COR*→                                                           | LRR-repeats+AP-GTPase+COR         | 358  | -        | Cyanobacteria       | Nostoc sp. UCD120       | leucine-rich repeat domain-containing protein, partial [Nostoc sp. UCD120]. | GCF_014222255.1 |
| WP_185584434.1 | PAS+HISKIN→ REC→ PSE→?→?→?→ LRR-repeats+AP-GTPase+COR+TIR*→                                                             | LRR-repeats+AP-GTPase+COR+TIR     | 1163 | -        | Cyanobacteria       | Nostoc sp. UCD120       | leucine-rich repeat domain-containing protein [Nostoc sp. UCD120].          | GCF_014222255.1 |
| WP_185591915.1 | <-PIN<-?<-?  ?→?→  <-Arginase<-?  LRR-repeats+AP-GTPase+COR+TIR*→                                                       | LRR-repeats+AP-GTPase+COR+TIR     | 802  | -        | Cyanobacteria       | Nostoc sp. UCD122       | leucine-rich repeat domain-containing protein [Nostoc sp. UCD122].          | GCF_014222275.1 |
| WP_185592013.1 | ABhydrolase→?→  <-?  COR+TIR→ LRR-repeats+AP-GTPase+COR+TIR*→?→  <-PIN                                                  | LRR-repeats+AP-GTPase+COR+TIR     | 1003 | -        | Cyanobacteria       | Nostoc sp. UCD122       | leucine-rich repeat domain-containing protein [Nostoc sp. UCD122].          | GCF_014222275.1 |
| WP_185592050.1 | LRR-repeats+AP-GTPase+COR+TIR*→                                                                                         | LRR-repeats+AP-GTPase+COR+TIR     | 859  | -        | Cyanobacteria       | Nostoc sp. UCD122       | leucine-rich repeat domain-containing protein, partial [Nostoc sp. UCD122]. | GCF_014222275.1 |
| WP_185592512.1 | Cluster5_5clades→ LRR-repeats+AP-GTPase+COR+TIR*→  <-CASPASE+TM                                                         | LRR-repeats+AP-GTPase+COR+TIR     | 893  | -        | Cyanobacteria       | Nostoc sp. UCD122       | leucine-rich repeat domain-containing protein [Nostoc sp. UCD122].          | GCF_014222275.1 |
| WP_185607149.1 | <-PIN<-?<-?  ?→?→  <-Arginase<-?  LRR-repeats+AP-GTPase+COR+TIR*→                                                       | LRR-repeats+AP-GTPase+COR+TIR     | 825  | -        | Cyanobacteria       | Nostoc sp. UCD121       | leucine-rich repeat domain-containing protein [Nostoc sp. UCD121].          | GCF_014222285.1 |
| WP_185607288.1 | LRR-repeats+AP-GTPase+COR+TIR*→?→?→?→ ABC_membrane+ABC_tran→ ABC_membrane+ABC_tran→                                     | LRR-repeats+AP-GTPase+COR+TIR     | 917  | -        | Cyanobacteria       | Nostoc sp. UCD121       | leucine-rich repeat domain-containing protein, partial [Nostoc sp. UCD121]. | GCF_014222285.1 |
| WP_186435859.1 | <-Cluster1077_2clades  Aminotran_1_2→?→  <-?<-?  ?→ LRR-repeats+AP-GTPase+COR*→                                         | LRR-repeats+AP-GTPase+COR         | 980  | -        | Gammaproteobacteria | Thalassolituus sp. C2-1 | GTP-binding protein [Thalassolituus sp. C2-1].                              | GCF_007785795.1 |
| WP_186890728.1 | <-Cluster1951_2clades<-?<-?  ?→ SIG+TM+TM+TM+HISKIN→?→  <-?  LRR-repeats+AP-GTPase+COR+DrHyd*→  <-?<-REC                | LRR-repeats+AP-GTPase+COR+DrHyd   | 1036 | -        | Betaproteobacteria  | Undibacterium amnicola  | hypothetical protein [Undibacterium amnicola].                              | GCF_014284275.1 |
| WP_186956531.1 | LRR-repeats+AP-GTPase+COR+TIR*→                                                                                         | LRR-repeats+AP-GTPase+COR+TIR     | 1232 | -        | Betaproteobacteria  | Undibacterium sp. NL8W  | leucine-rich repeat domain-containing protein [Undibacterium sp. NL8W].     | GCF_014284125.1 |
| WP_187308183.1 | LRR-repeats+AP-GTPase+COR+TM+TM*→  <-?<-?  ?→?→  <-?<-?<-SNF                                                            | LRR-repeats+AP-GTPase+COR+TM+TM   | 720  | -        | Cyanobacteria       | Nostoc cycadae          | leucine-rich repeat domain-containing protein, partial [Nostoc cycadae].    | GCF_002897135.1 |
| WP_187315132.1 | LRR-repeats+AP-GTPase+COR*→?→?→?→  <-?<-tRNA<-?<-?<-Cluster1829_2clades                                                 | LRR-repeats+AP-GTPase+COR         | 914  | -        | Bacteroidetes       | Hymenobacter sp. BT190  | GTP-binding protein [Hymenobacter sp. BT190].                               | GCF_014333525.1 |
| WP_187466435.1 | LRR-repeats+AP-GTPase+COR+EAD11→?→?→ LRR-repeats+AP-GTPase+COR+EAD11→                                                   | LRR-repeats+AP-GTPase+COR+EAD11   | 1040 | -        | Bacteroidetes       | Lewinella lacunae       | leucine-rich repeat domain-containing protein [Lewinella lacunae].          | GCF_014349155.1 |
| WP_187466438.1 | LRR-repeats+AP-GTPase+COR+EAD11*→                                                                                       | LRR-repeats+AP-GTPase+COR+EAD11   | 931  | -        | Bacteroidetes       | Lewinella lacunae       | leucine-rich repeat domain-containing protein [Lewinella lacunae].          | GCF_014349155.1 |
| WP_187467589.1 | GTPase-AIG→  <-?  ?→?→  <-?<-?<-?  LRR-repeats+AP-GTPase+COR+CASPASE*→?→ FGS→?→ RVT→?→ FGS→                             | LRR-repeats+AP-GTPase+COR+CASPASE | 1063 | -        | Bacteroidetes       | Lewinella lacunae       | CHAT domain-containing protein [Lewinella lacunae].                         | GCF_014349155.1 |
| WP_187560609.1 | SIGMA-HTH→?→ RADICAL-SAM→ LRR-repeats+AP-GTPase+COR+TIR*→?→ HISKIN→                                                     | LRR-repeats+AP-GTPase+COR+TIR     | 970  | -        | Bacteroidetes       | Kordia sp. YSTF-M3      | leucine-rich repeat domain-containing protein [Kordia sp. YSTF-M3].         | GCF_014397005.1 |
| WP_18775535.1  | HTH→?→?→ LRR-repeats+AP-GTPase+COR+TIR*→  <-?<-ABC_membrane+ABC_tran  Cyanophycinsyn-ATPgrasp→ Cyanophycinsyn-ATPgrasp→ | LRR-repeats+AP-GTPase+COR+TIR     | 1298 | -        | Betaproteobacteria  | Sphaerotilus natans     | leucine-rich repeat domain-containing protein [Sphaerotilus natans].        | GCF_008329925.1 |

Gene neighborhoods and domain architectures of APGTPases whose LRR domains are either absent or not detected

| acc        | operon                                                                                | architecture          | len  | gen.name     | taxend              | species                         | define                                                                                                             | gca             |
|------------|---------------------------------------------------------------------------------------|-----------------------|------|--------------|---------------------|---------------------------------|--------------------------------------------------------------------------------------------------------------------|-----------------|
| AAP36207.1 | AP-GTPase*→                                                                           | AP-GTPase             | 220  | -            | -                   | synthetic construct             | Homo sapiens RAB3D, member RAS oncogene family, partial [synthetic construct].                                     | -               |
| AAP36967.1 | AP-GTPase*→                                                                           | AP-GTPase             | 208  | -            | -                   | synthetic construct             | Homo sapiens mel transforming oncogene (derived from cell line NK14)- RAB8 homolog, partial [synthetic construct]. | -               |
| AAV38505.1 | AP-GTPase*→                                                                           | AP-GTPase             | 204  | -            | -                   | synthetic construct             | RAB13, member RAS oncogene family, partial [synthetic construct].                                                  | -               |
| AAX32379.1 | AP-GTPase*→                                                                           | AP-GTPase             | 207  | MEL          | -                   | synthetic construct             | RAB8A [synthetic construct].                                                                                       | -               |
| AAX36766.1 | AP-GTPase*→                                                                           | AP-GTPase             | 204  | RAB13        | -                   | synthetic construct             | RAB13 member RAS oncogene family, partial [synthetic construct].                                                   | -               |
| AAX41198.1 | AP-GTPase*→                                                                           | AP-GTPase             | 203  | RAB13        | -                   | synthetic construct             | RAB13 member RAS oncogene family [synthetic construct].                                                            | -               |
| AAX42776.1 | AP-GTPase*→                                                                           | AP-GTPase             | 204  | RAB13        | -                   | synthetic construct             | RAB13 member RAS oncogene family, partial [synthetic construct].                                                   | -               |
| ABG50724.1 | vWA-L+AP-GTPase+COR*→                                                                 | vWA-L+AP-GTPase+COR   | 748  | Tery_1428    | Cyanobacteria       | Trichodesmium erythraeum IMS101 | Miro-like [Trichodesmium erythraeum IMS101].                                                                       | GCA_000014265.1 |
| ABW29719.1 | AP-GTPase+ZNR*→                                                                       | AP-GTPase+ZNR         | 705  | AM1_4747     | Cyanobacteria       | Acaryochloris marina MBIC11017  | conserved hypothetical protein [Acaryochloris marina MBIC11017].                                                   | GCA_000018105.1 |
| ACL85629.1 | AP-GTPase*→                                                                           | AP-GTPase             | 204  | Rab10        | -                   | Drosophila melanogaster         | Rab10-PA, partial [synthetic construct].                                                                           | -               |
| ACL86538.1 | AP-GTPase*→                                                                           | AP-GTPase             | 223  | Rab30        | -                   | Drosophila melanogaster         | Rab30-PA, partial [synthetic construct].                                                                           | -               |
| ADQ32831.1 | AP-GTPase*→                                                                           | AP-GTPase             | 219  | RAB3B        | -                   | Homo sapiens                    | RAB3B, member RAS oncogene family, partial [synthetic construct].                                                  | -               |
| AFZ01290.1 | <-EAD10+VMAP-M1+VMAP-C  ?→ CASPASE+EAD10→ EAD10+VMAP-M1+VMAP-C→?→ VWA+AP-GTPase+COR*→ | VWA+AP-GTPase+COR     | 1196 | Cal6303_2274 | Cyanobacteria       | Calothrix sp. PCC 6303          | Miro domain protein [Calothrix sp. PCC 6303].                                                                      | GCA_000317435.1 |
| AIC55004.1 | AP-GTPase*→                                                                           | AP-GTPase             | 219  | -            | -                   | Homo sapiens                    | RAB3B, partial [synthetic construct].                                                                              | -               |
| AIC55612.1 | AP-GTPase*→                                                                           | AP-GTPase             | 219  | -            | -                   | Homo sapiens                    | RAB3D, partial [synthetic construct].                                                                              | -               |
| ASF48224.1 | AP-GTPase+COR+DUF4404*→                                                               | AP-GTPase+COR+DUF4404 | 879  | CEK71_20365  | Gammaproteobacteria | Methylovulum psychrotolerans    | hypothetical protein CEK71_20365 [Methylovulum psychrotolerans].                                                   | GCA_002209385.1 |
| ATO96390.1 | AP-GTPase*→                                                                           | AP-GTPase             | 207  | rab8b        | -                   | Xenopus tropicalis              | RAB8B, member RAS oncoprotein family, partial [synthetic construct].                                               | -               |

| acc          | operon                                                 | architecture                  | len  | gen.name        | taxend                | species                            | define                                                                         | gca             |
|--------------|--------------------------------------------------------|-------------------------------|------|-----------------|-----------------------|------------------------------------|--------------------------------------------------------------------------------|-----------------|
| CCQ62557.1   | AP-GTPase+COR*→                                        | AP-GTPase+COR                 | 279  | CWATWH0401_4507 | Cyanobacteria         | Crocospaera watsonii WH 0401       | Leucine-rich repeat [Crocospaera watsonii WH 0401].                            | GCA_001039615.1 |
| CCZ82707.1   | AP-GTPase+COR*→                                        | AP-GTPase+COR                 | 843  | BN709_01979     | Bacteroidetes         | Odoribacter laneus CAG:561         | putative uncharacterized protein [Odoribacter laneus CAG:561].                 | GCA_000432935.1 |
| HAA12500.1   | AP-GTPase+COR*→                                        | AP-GTPase+COR                 | 908  | DCE41_12685     | Bacteroidetes         | Cytophagales bacterium             | TPA: hypothetical protein DCE41_12685 [Cytophagales bacterium].                | GCA_003444355.1 |
| HAA13307.1   | AP-GTPase+COR*→                                        | AP-GTPase+COR                 | 878  | DCE41_17110     | Bacteroidetes         | Cytophagales bacterium             | TPA: hypothetical protein DCE41_17110 [Cytophagales bacterium].                | GCA_003444355.1 |
| HAC65063.1   | DNAJ→ AP-GTPase*→ COR+TM+TM→                           | AP-GTPase                     | 125  | DCF68_16430     | Cyanobacteria         | Cyanothece sp. UBA12306            | TPA: GTPase, partial [Cyanothece sp. UBA12306].                                | GCA_003448685.1 |
| HAK76392.1   | AP-GTPase+COR*→                                        | AP-GTPase+COR                 | 733  | DCM71_05675     | Bacteroidetes         | Runella sp.                        | TPA: hypothetical protein DCM71_05675, partial [Runella sp.].                  | GCA_003452005.1 |
| HAO21703.1   | AP-GTPase*→                                            | AP-GTPase                     | 569  | DCQ37_15290     | Deltaproteobacteria   | Desulfobacteraceae bacterium       | TPA: hypothetical protein DCQ37_15290, partial [Desulfobacteraceae bacterium]. | GCA_003456735.1 |
| HAP58612.1   | AP-GTPase+COR*→                                        | AP-GTPase+COR                 | 696  | DCR93_03550     | Bacteroidetes         | Cytophagales bacterium             | TPA: hypothetical protein DCR93_03550, partial [Cytophagales bacterium].       | GCA_003454975.1 |
| HAP62400.1   | AP-GTPase+COR*→?→ cNMPBD→ SIG+Phytase-like→            | AP-GTPase+COR                 | 744  | DCR93_23850     | Bacteroidetes         | Cytophagales bacterium             | TPA: hypothetical protein DCR93_23850 [Cytophagales bacterium].                | GCA_003454975.1 |
| HCS91914.1   | TIR+BetaPropeller+AP-GTPase*→                          | TIR+BetaPropeller+AP-GTPase   | 1236 | DIW77_18260     | Gammaproteobacteria   | Chromatiaceae bacterium            | TPA: hypothetical protein DIW77_18260 [Chromatiaceae bacterium].               | GCA_003525925.1 |
| HEY83669.1   | AP-GTPase+COR*→                                        | AP-GTPase+COR                 | 260  | G4N96_00950     | Chloroflexi           | Chloroflexi bacterium              | TPA: hypothetical protein G4N96_00950 [Chloroflexi bacterium].                 | GCA_011192195.1 |
| HEY85168.1   | AP-GTPase*→                                            | AP-GTPase                     | 319  | G4N96_08685     | Chloroflexi           | Chloroflexi bacterium              | TPA: hypothetical protein G4N96_08685 [Chloroflexi bacterium].                 | GCA_011192195.1 |
| HFS11412.1   | BetaPropeller+AP-GTPase+TIR*→?→  <-?  ?→?→  <-SIG+PSBP | BetaPropeller+AP-GTPase+TIR   | 1179 | ENR14_24625     | Cyanobacteria         | Anabaena sp.                       | TPA: TIR domain-containing protein [Anabaena sp.].                             | GCA_011332035.1 |
| HGZ32338.1   | AP-GTPase+COR*→                                        | AP-GTPase+COR                 | 503  | ENR17_19310     | Bacteroidetes         | Bacteroidetes bacterium            | TPA: GTPase, partial [Bacteroidetes bacterium].                                | GCA_011331955.1 |
| HHN34802.1   | AP-GTPase*→                                            | AP-GTPase                     | 171  | ENM07_01585     | Bacteroidetes         | Bacteroidetes bacterium            | TPA: GTP-binding protein [Bacteroidetes bacterium].                            | GCA_011375975.1 |
| KAB2958401.1 | SIG+AP-GTPase+COR*→                                    | SIG+AP-GTPase+COR             | 688  | F9K13_13725     | Bacteria              | Candidatus Methyloirabilis oxyfera | hypothetical protein F9K13_13725 [Candidatus Methyloirabilis oxyfera].         | GCA_009026205.1 |
| KAF0250167.1 | AP-GTPase+COR+Calcineurin+FGS*→                        | AP-GTPase+COR+Calcineurin+FGS | 1237 | FD167_433       | unclassified Bacteria | bacterium                          | small GTP-binding protein, partial [bacterium].                                | GCA_009773835.1 |
| KHD09711.1   | AP-GTPase+COR*→                                        | AP-GTPase+COR                 | 530  | PN36_20855      | Gammaproteobacteria   | Candidatus Thiomargarita nelsonii  | hypothetical protein PN36_20855 [Candidatus Thiomargarita nelsonii].           | GCA_000785145.2 |
| MBC6419378.1 | AP-GTPase*→ COR→                                       | AP-GTPase                     | 165  | GDA44_11670     | Cyanobacteria         | Prochloron sp. SP5CPC1             | hypothetical protein GDA44_11670 [Prochloron sp. SP5CPC1].                     | GCA_014323965.1 |

| acc        | operon                                                                                                                                            | architecture                | len  | gen.name    | taxend              | species                                 | defline                                                                    | gca             |
|------------|---------------------------------------------------------------------------------------------------------------------------------------------------|-----------------------------|------|-------------|---------------------|-----------------------------------------|----------------------------------------------------------------------------|-----------------|
| NAT10406.1 | AP-GTPase*→                                                                                                                                       | AP-GTPase                   | 611  | C4E22_02470 | Euryarchaeota       | ANME-1 cluster archaeon AG-394-G06      | hypothetical protein C4E22_02470 [ANME-1 cluster archaeon AG-394-G06].     | GCA_009903405.1 |
| NBO93394.1 | AP-GTPase+COR*→                                                                                                                                   | AP-GTPase+COR               | 916  | EBV06_13945 | Planctomycetes      | Planctomycetia bacterium                | hypothetical protein EBV06_13945 [Planctomycetia bacterium].               | GCA_009918525.1 |
| NBQ70341.1 | TIR+AP-GTPase+COR*→                                                                                                                               | TIR+AP-GTPase+COR           | 582  | EBU46_16510 | Betaproteobacteria  | Nitrosomonadaceae bacterium             | TIR domain-containing protein, partial [Nitrosomonadaceae bacterium].      | GCA_009919685.1 |
| NHJ32288.1 | AP-GTPase*→                                                                                                                                       | AP-GTPase                   | 230  | FK732_05460 | Asgard group        | Asgard group archaeon                   | GTP-binding protein [Asgard group archaeon].                               | GCA_011366225.1 |
| NIM12342.1 | TIR+BetaPropeller+AP-GTPase*→                                                                                                                     | TIR+BetaPropeller+AP-GTPase | 1000 | GTO81_10200 | Bacteria            | Candidatus Aminicenantes bacterium      | DUF4365 domain-containing protein [Candidatus Aminicenantes bacterium].    | GCA_011771225.1 |
| NIM12946.1 | TIR+BetaPropeller+AP-GTPase*→                                                                                                                     | TIR+BetaPropeller+AP-GTPase | 1108 | GTO81_13270 | Bacteria            | Candidatus Aminicenantes bacterium      | TIR domain-containing protein [Candidatus Aminicenantes bacterium].        | GCA_011771225.1 |
| NIR05736.1 | TIR+BetaPropeller+AP-GTPase*→ Cluster2387_2clades→ Cluster2274_2clades→  <-Cluster2216_2clades  Cluster2371_2clades→  <-?<-?<-Cluster2251_2clades | TIR+BetaPropeller+AP-GTPase | 1004 | GTN82_09930 | Bacteria            | Candidatus Aminicenantes bacterium      | DUF4365 domain-containing protein [Candidatus Aminicenantes bacterium].    | GCA_011773265.1 |
| NJL71192.1 | AP-GTPase*→                                                                                                                                       | AP-GTPase                   | 248  | HC888_06030 | Gammaproteobacteria | Candidatus Competibacteraceae bacterium | GTP-binding protein [Candidatus Competibacteraceae bacterium].             | GCA_012031515.1 |
| NJO13505.1 | AP-GTPase*→?→ TIR→                                                                                                                                | AP-GTPase                   | 144  | HC872_08630 | Gammaproteobacteria | Gammaproteobacteria bacterium           | hypothetical protein HC872_08630 [Gammaproteobacteria bacterium].          | GCA_012032615.1 |
| NKB62496.1 | AP-GTPase+COR*→                                                                                                                                   | AP-GTPase+COR               | 274  | GKR95_10365 | Gammaproteobacteria | Gammaproteobacteria bacterium           | hypothetical protein GKR95_10365 [Gammaproteobacteria bacterium].          | GCA_012103415.1 |
| NLZ73760.1 | AP-GTPase*→                                                                                                                                       | AP-GTPase                   | 202  | GX905_08105 | Bacteroidetes       | Bacteroidales bacterium                 | hypothetical protein GX905_08105 [Bacteroidales bacterium].                | GCA_012800615.1 |
| NMC05010.1 | AP-GTPase*→                                                                                                                                       | AP-GTPase                   | 190  | GYA24_07360 | Asgard group        | Candidatus Lokiarchaeota archaeon       | GTP-binding protein [Candidatus Lokiarchaeota archaeon].                   | GCA_012798355.1 |
| NNJ85485.1 | AP-GTPase*→                                                                                                                                       | AP-GTPase                   | 345  | HKP13_11240 | Gammaproteobacteria | Gammaproteobacteria bacterium           | hypothetical protein HKP13_11240, partial [Gammaproteobacteria bacterium]. | GCA_013042035.1 |
| NOQ28062.1 | AP-GTPase+COR*→                                                                                                                                   | AP-GTPase+COR               | 845  | GQ564_22090 | Bacteroidetes       | Bacteroidales bacterium                 | hypothetical protein GQ564_22090 [Bacteroidales bacterium].                | GCA_013138975.1 |
| NOS87668.1 | AP-GTPase+COR+DUF4404*→ REase→                                                                                                                    | AP-GTPase+COR+DUF4404       | 775  | HOP34_03865 | Gammaproteobacteria | Methylococcaceae bacterium              | hypothetical protein HOP34_03865, partial [Methylococcaceae bacterium].    | GCA_013140465.1 |
| NOT02643.1 | AP-GTPase+COR*→                                                                                                                                   | AP-GTPase+COR               | 1127 | HOP29_18715 | Planctomycetes      | Phycisphaerales bacterium               | hypothetical protein HOP29_18715 [Phycisphaerales bacterium].              | GCA_013140575.1 |
| NOT61891.1 | TIR+BetaPropeller+AP-GTPase*→                                                                                                                     | TIR+BetaPropeller+AP-GTPase | 1134 | HOP19_16880 | Acidobacteria       | Acidobacteria bacterium                 | TIR domain-containing protein [Acidobacteria bacterium].                   | GCA_013140935.1 |

| acc        | operon                                       | architecture                        | len  | gen.name       | taxend              | species                                    | define                                                                         | gca             |
|------------|----------------------------------------------|-------------------------------------|------|----------------|---------------------|--------------------------------------------|--------------------------------------------------------------------------------|-----------------|
| NOU19042.1 | AP-GTPase+COR*→                              | AP-GTPase+COR                       | 850  | HOO91_15910    | Bacteroidetes       | Bacteroidales bacterium                    | hypothetical protein HOO91_15910 [Bacteroidales bacterium].                    | GCA_013141385.1 |
| NOY42283.1 | AP-GTPase+COR*→                              | AP-GTPase+COR                       | 659  | GXP26_10655    | Planctomycetes      | Planctomycetes bacterium                   | hypothetical protein GXP26_10655 [Planctomycetes bacterium].                   | GCA_013152205.1 |
| NOY62616.1 | AP-GTPase+COR+DUF4404*→                      | AP-GTPase+COR+DUF4404               | 555  | GXP10_05565    | Gammaproteobacteria | Gammaproteobacteria bacterium              | hypothetical protein GXP10_05565, partial [Gammaproteobacteria bacterium].     | GCA_013152295.1 |
| NPE06693.1 | AP-GTPase*→                                  | AP-GTPase                           | 212  | GNW80_00285    | Asgard group        | Asgard group archaeon                      | GTP-binding protein [Asgard group archaeon].                                   | GCA_013166835.1 |
| NQT13008.1 | TIR+BetaPropeller+AP-GTPase*→                | TIR+BetaPropeller+AP-GTPase         | 698  | HQ582_09690    | Planctomycetes      | Planctomycetes bacterium                   | TIR domain-containing protein, partial [Planctomycetes bacterium].             | GCA_013202485.1 |
| NQU22914.1 | AP-GTPase*→                                  | AP-GTPase                           | 350  | HQ567_16680    | Bacteria            | Candidatus Nealsobacteria bacterium        | hypothetical protein HQ567_16680 [Candidatus Nealsobacteria bacterium].        | GCA_013202865.1 |
| NQZ10247.1 | AP-GTPase+COR*→                              | AP-GTPase+COR                       | 798  | HRT35_24105    | Gammaproteobacteria | Algicola sp.                               | hypothetical protein HRT35_24105 [Algicola sp.].                               | GCA_013216025.1 |
| NQZ12034.1 | AP-GTPase+COR*→                              | AP-GTPase+COR                       | 875  | HRT35_33190    | Gammaproteobacteria | Algicola sp.                               | hypothetical protein HRT35_33190 [Algicola sp.].                               | GCA_013216025.1 |
| NTV51179.1 | SIG+ZetaToxin→ TIR+BetaPropeller+AP-GTPase*→ | TIR+BetaPropeller+AP-GTPase         | 1151 | HGA20_16230    | Deltaproteobacteria | Geobacteraceae bacterium                   | TIR domain-containing protein [Geobacteraceae bacterium].                      | GCA_013336525.1 |
| NUN13817.1 | BetaPropeller+AP-GTPase+Calcineurin*→        | BetaPropeller+AP-GTPase+Calcineurin | 1598 | HUU55_09280    | Deltaproteobacteria | Myxococcales bacterium                     | metallophosphoesterase [Myxococcales bacterium].                               | GCA_013360285.1 |
| NVO09097.1 | AP-GTPase+COR*→                              | AP-GTPase+COR                       | 866  | HXX16_03955    | Bacteroidetes       | Bacteroidales bacterium                    | 50S ribosome-binding GTPase [Bacteroidales bacterium].                         | GCA_013376985.1 |
| OHD42862.1 | AP-GTPase+COR+DrHyd*→                        | AP-GTPase+COR+DrHyd                 | 671  | A2086_15900    | Spirochaetes        | Spirochaetes bacterium GWD1_27_9           | hypothetical protein A2086_15900 [Spirochaetes bacterium GWD1_27_9].           | GCA_001830585.1 |
| OLS14677.1 | AP-GTPase*→                                  | AP-GTPase                           | 170  | RBG13Loki_1719 | Asgard group        | Candidatus Lokiarchaeota archaeon CR_4     | small GTP-binding protein [Candidatus Lokiarchaeota archaeon CR_4].            | GCA_001940655.1 |
| OQW99838.1 | AP-GTPase+COR*→                              | AP-GTPase+COR                       | 550  | BWK73_49720    | Gammaproteobacteria | Thiothrix lacustris                        | hypothetical protein BWK73_49720 [Thiothrix lacustris].                        | GCA_002083875.1 |
| OQX07299.1 | AP-GTPase*→                                  | AP-GTPase                           | 495  | BWK80_49630    | Deltaproteobacteria | Desulfobacteraceae bacterium IS3           | hypothetical protein BWK80_49630, partial [Desulfobacteraceae bacterium IS3].  | GCA_002083955.1 |
| OQX29968.1 | AP-GTPase+COR*→                              | AP-GTPase+COR                       | 659  | B0D92_00955    | Spirochaetes        | Spirochaeta sp. LUC14_002_19_P3            | hypothetical protein B0D92_00955, partial [Spirochaeta sp. LUC14_002_19_P3].   | GCA_002084135.1 |
| OQY29953.1 | AP-GTPase+COR+CASPASE*→                      | AP-GTPase+COR+CASPASE               | 1279 | B6244_01455    | FCB group           | Candidatus Cloacimonetes bacterium 4572_55 | hypothetical protein B6244_01455 [Candidatus Cloacimonetes bacterium 4572_55]. | GCA_002084765.1 |

| acc        | operon                                              | architecture                           | len  | gen.name       | taxend              | species                                              | define                                                                                   | gca             |
|------------|-----------------------------------------------------|----------------------------------------|------|----------------|---------------------|------------------------------------------------------|------------------------------------------------------------------------------------------|-----------------|
| OYW77642.1 | AP-GTPase+COR*→                                     | AP-GTPase+COR                          | 915  | B7Z37_03570    | Verrucomicrobia     | Verrucomicrobia bacterium 12-59-8                    | hypothetical protein B7Z37_03570, partial [Verrucomicrobia bacterium 12-59-8].           | GCA_002279765.1 |
| PID37771.1 | AP-GTPase+COR*→                                     | AP-GTPase+COR                          | 901  | CR966_00525    | Gammaproteobacteria | Pseudomonadales bacterium                            | hypothetical protein CR966_00525 [Pseudomonadales bacterium].                            | GCA_002746545.1 |
| PIE42009.1 | AP-GTPase+COR+DUF4404*→                             | AP-GTPase+COR+DUF4404                  | 686  | CSA47_02360    | Gammaproteobacteria | Gammaproteobacteria bacterium                        | hypothetical protein CSA47_02360 [Gammaproteobacteria bacterium].                        | GCA_002748595.1 |
| PKL67687.1 | BetaPropeller+AP-GTPase+PrimaseZnR+TIR*→            | BetaPropeller+AP-GTPase+PrimaseZnR+TIR | 1195 | CVV28_05310    | Euryarchaeota       | Methanobacteriales archaeon HGW-Methanobacteriales-1 | hypothetical protein CVV28_05310 [Methanobacteriales archaeon HGW-Methanobacteriales-1]. | GCA_002839705.1 |
| POZ51526.1 | AP-GTPase+COR+DUF4404*→                             | AP-GTPase+COR+DUF4404                  | 919  | AADEFJLK_02392 | Gammaproteobacteria | Methylovulum psychrotolerans                         | GTP-binding protein [Methylovulum psychrotolerans].                                      | GCA_002923755.1 |
| PPD43153.1 | AP-GTPase+COR+DUF4404*→                             | AP-GTPase+COR+DUF4404                  | 914  | CTY16_13990    | Gammaproteobacteria | Methylobacter sp.                                    | hypothetical protein CTY16_13990 [Methylobacter sp.].                                    | GCA_002929035.1 |
| PPD50180.1 | AP-GTPase+COR+DUF4404*→                             | AP-GTPase+COR+DUF4404                  | 927  | CTY13_02150    | Gammaproteobacteria | Methylobacter sp.                                    | hypothetical protein CTY13_02150 [Methylobacter sp.].                                    | GCA_002929095.1 |
| PPD50460.1 | PolB→ Cluster2355_2clades→ AP-GTPase+COR+DUF4404*→  | AP-GTPase+COR+DUF4404                  | 904  | CTY16_01515    | Gammaproteobacteria | Methylobacter sp.                                    | hypothetical protein CTY16_01515 [Methylobacter sp.].                                    | GCA_002929035.1 |
| QDT95532.1 | TIR+APATPase+TPR+TPR+TPR→?→ AP-GTPase+COR+DUF4404*→ | AP-GTPase+COR+DUF4404                  | 683  | V144x_09770    | Planctomycetes      | Gimesia aquarii                                      | Miro-like protein [Gimesia aquarii].                                                     | GCA_007748195.1 |
| RCJ23846.1 | VWA+AP-GTPase+COR+TIR+TIR*→                         | VWA+AP-GTPase+COR+TIR+TIR              | 1359 | A6770_28940    | Cyanobacteria       | Nostoc minutum NIES-26                               | hypothetical protein A6770_28940 [Nostoc minutum NIES-26].                               | GCA_003326215.1 |
| RHO76387.1 | AP-GTPase*→                                         | AP-GTPase                              | 197  | DW061_22950    | Firmicutes          | Ruminococcus sp. AF42-9BH                            | hypothetical protein DW061_22950, partial [Ruminococcus sp. AF42-9BH].                   | GCA_003477585.1 |
| RIK66911.1 | SIG+AP-GTPase+COR*→                                 | SIG+AP-GTPase+COR                      | 867  | DCC65_08160    | Planctomycetes      | Planctomycetes bacterium                             | hypothetical protein DCC65_08160 [Planctomycetes bacterium].                             | GCA_003576905.1 |
| RKZ52796.1 | AP-GTPase+COR*→                                     | AP-GTPase+COR                          | 469  | DRR00_06990    | Gammaproteobacteria | Gammaproteobacteria bacterium                        | hypothetical protein DRR00_06990 [Gammaproteobacteria bacterium].                        | GCA_003645185.1 |
| RLI66235.1 | AP-GTPase*→                                         | AP-GTPase                              | 176  | DRO88_02330    | Asgard group        | Candidatus Lokiarchaeota archaeon                    | GTP-binding protein [Candidatus Lokiarchaeota archaeon].                                 | GCA_003662865.1 |
| RLI69359.1 | AP-GTPase*→                                         | AP-GTPase                              | 199  | DRP02_10785    | Asgard group        | Candidatus Heimdallarchaeota archaeon                | hypothetical protein DRP02_10785 [Candidatus Heimdallarchaeota archaeon].                | GCA_003662935.1 |
| RTZ62858.1 | AP-GTPase+COR*→                                     | AP-GTPase+COR                          | 577  | DSZ29_07625    | Aquificae           | Aquificaceae bacterium                               | hypothetical protein DSZ29_07625 [Aquificaceae bacterium].                               | GCA_003972955.1 |

| acc        | operon                                       | architecture                | len  | gen.name            | taxend              | species                                    | define                                                                         | gca             |
|------------|----------------------------------------------|-----------------------------|------|---------------------|---------------------|--------------------------------------------|--------------------------------------------------------------------------------|-----------------|
| RYE19062.1 | AP-GTPase+COR*→                              | AP-GTPase+COR               | 577  | EOP45_13210         | Bacteroidetes       | Sphingobacteriaceae bacterium              | GTP-binding protein, partial [Sphingobacteriaceae bacterium].                  | GCA_004144285.1 |
| RZL32479.1 | SIG+AP-GTPase+COR*→                          | SIG+AP-GTPase+COR           | 392  | EOP00_33890         | Bacteroidetes       | Pedobacter sp.                             | GTP-binding protein, partial [Pedobacter sp.].                                 | GCA_004211475.1 |
| SEM19691.1 | SIG+AP-GTPase+COR*→                          | SIG+AP-GTPase+COR           | 929  | SAMN04489760_10698  | Deltaproteobacteria | Syntrophus gentianae                       | small GTP-binding protein domain-containing protein [Syntrophus gentianae].    | GCA_900109885.1 |
| SKA90036.1 | AP-GTPase*→                                  | AP-GTPase                   | 120  | SAMN02745166_01647  | Verrucomicrobia     | Prostheco bacter debontii                  | hypothetical protein SAMN02745166_01647 [Prostheco bacter debontii].           | GCA_900167535.1 |
| SNR48942.1 | BetaPropeller+AP-GTPase+TIR*→                | BetaPropeller+AP-GTPase+TIR | 1008 | SAMN06264365_102815 | Actinobacteria      | Actinoplanes regularis                     | small GTP-binding protein domain-containing protein [Actinoplanes regularis].  | GCA_900188005.1 |
| TAA74167.1 | AP-GTPase*→                                  | AP-GTPase                   | 415  | CDV28_13720         | Deltaproteobacteria | Candidatus Electronema sp. GS              | Ras of Complex, Roc, domain of DAPkinase [Candidatus Electronema sp. GS].      | GCA_004284765.1 |
| TAN66684.1 | AP-GTPase+COR+DUF4404*→                      | AP-GTPase+COR+DUF4404       | 912  | EPN17_13365         | Gammaproteobacteria | Methylobacter sp.                          | hypothetical protein EPN17_13365 [Methylobacter sp.].                          | GCA_004299305.1 |
| TET30065.1 | AP-GTPase*→                                  | AP-GTPase                   | 212  | E3J70_05515         | Asgard group        | Candidatus Heimdallarchaeota archaeon      | GTP-binding protein [Candidatus Heimdallarchaeota archaeon].                   | GCA_004376455.1 |
| TFF85226.1 | AP-GTPase*→                                  | AP-GTPase                   | 173  | EU518_01555         | Asgard group        | Candidatus Lokiarchaeota archaeon          | GTP-binding protein [Candidatus Lokiarchaeota archaeon].                       | GCA_004524075.1 |
| TFF94051.1 | AP-GTPase*→                                  | AP-GTPase                   | 179  | EU544_04990         | Asgard group        | Candidatus Lokiarchaeota archaeon          | GTP-binding protein [Candidatus Lokiarchaeota archaeon].                       | GCA_004524325.1 |
| TFG01113.1 | AP-GTPase*→                                  | AP-GTPase                   | 173  | EU542_07480         | Asgard group        | Candidatus Lokiarchaeota archaeon          | GTP-binding protein [Candidatus Lokiarchaeota archaeon].                       | GCA_004524355.1 |
| TFG18716.1 | AP-GTPase*→                                  | AP-GTPase                   | 217  | EU530_08380         | Asgard group        | Candidatus Lokiarchaeota archaeon          | GTP-binding protein [Candidatus Lokiarchaeota archaeon].                       | GCA_004524545.1 |
| TKG00166.1 | AP-GTPase+COR*→                              | AP-GTPase+COR               | 467  | FCV76_15430         | Gammaproteobacteria | Vibrio sp. F13                             | GTP-binding protein [Vibrio sp. F13].                                          | GCA_005146615.1 |
| TKJ20917.1 | AP-GTPase*→                                  | AP-GTPase                   | 192  | CEE42_14430         | Asgard group        | Candidatus Lokiarchaeota archaeon Loki_b31 | hypothetical protein CEE42_14430 [Candidatus Lokiarchaeota archaeon Loki_b31]. | GCA_005222975.1 |
| TLU87712.1 | SIG+ZetaToxin→ TIR+BetaPropeller+AP-GTPase*→ | TIR+BetaPropeller+AP-GTPase | 1149 | FDX21_02485         | Chlorobi            | Chlorobium sp.                             | TIR domain-containing protein [Chlorobium sp.].                                | GCA_005862225.1 |
| TOG86811.1 | AP-GTPase+COR*→                              | AP-GTPase+COR               | 675  | CGI91_22345         | Gammaproteobacteria | Vibrio parahaemolyticus                    | hypothetical protein CGI91_22345 [Vibrio parahaemolyticus].                    | GCA_006372615.1 |
| TPQ26187.1 | AP-GTPase+COR+TM+TM*→                        | AP-GTPase+COR+TM+TM         | 752  | C2U68_12455         | Gammaproteobacteria | Methylomonas koyamae                       | hypothetical protein C2U68_12455 [Methylomonas koyamae].                       | GCA_006483455.1 |
| TXT62600.1 | AP-GTPase*→                                  | AP-GTPase                   | 178  | BAJALOKI3v1_540018  | Asgard group        | Candidatus Lokiarchaeota archaeon          | GTP-binding protein Der [Candidatus Lokiarchaeota archaeon].                   | GCA_008080735.1 |



| acc        | operon                                        | architecture                                | len  | gen.name                     | taxend | species                   | define                                                                                      | gca |
|------------|-----------------------------------------------|---------------------------------------------|------|------------------------------|--------|---------------------------|---------------------------------------------------------------------------------------------|-----|
| VFJ44888.1 | TIR+BetaPropeller+AP-GTPase*→                 | TIR+BetaPropeller+AP-GTPase                 | 766  | BECKFW1821A_GA0114235_100658 | Gamma  | Candidatus Kentron sp. FW | WD domain-containing protein, G-beta repeat-containing protein [Candidatus Kentron sp. FW]. | -   |
| VFJ45524.1 | AP-GTPase+COR+TM+TM*→                         | AP-GTPase+COR+TM+TM                         | 839  | BECKFM1743C_GA0114222_100766 | Gamma  | Candidatus Kentron sp. FM | Ras of Complex, Roc, domain of DAPkinase [Candidatus Kentron sp. FM].                       | -   |
| VFJ50707.1 | TIR+BetaPropeller+AP-GTPase*→                 | TIR+BetaPropeller+AP-GTPase                 | 1132 | BECKFW1821B_GA0114236_100740 | Gamma  | Candidatus Kentron sp. FW | WD40 repeat [Candidatus Kentron sp. FW].                                                    | -   |
| VFJ53002.1 | AP-GTPase+COR+TM+TM*→                         | AP-GTPase+COR+TM+TM                         | 812  | BECKDK2373C_GA0170839_103824 | Gamma  | Candidatus Kentron sp. DK | Ras of Complex, Roc, domain of DAPkinase [Candidatus Kentron sp. DK].                       | -   |
| VFJ54602.1 | AP-GTPase+COR+TM+TM*→                         | AP-GTPase+COR+TM+TM                         | 670  | BECKDK2373C_GA0170839_104044 | Gamma  | Candidatus Kentron sp. DK | Ras of Complex, Roc, domain of DAPkinase, partial [Candidatus Kentron sp. DK].              | -   |
| VFJ56646.1 | AP-GTPase+COR+TM+TM*→                         | AP-GTPase+COR+TM+TM                         | 841  | BECKDK2373B_GA0170837_106044 | Gamma  | Candidatus Kentron sp. DK | Ras of Complex, Roc, domain of DAPkinase [Candidatus Kentron sp. DK].                       | -   |
| VFJ57440.1 | AP-GTPase*→                                   | AP-GTPase                                   | 395  | BECKFW1821B_GA0114236_103044 | Gamma  | Candidatus Kentron sp. FW | Ras of Complex, Roc, domain of DAPkinase, partial [Candidatus Kentron sp. FW].              | -   |
| VFJ59594.1 | AP-GTPase+COR+CR-ATPase8+CR-REase7+TM+TM+TM*→ | AP-GTPase+COR+CR-ATPase8+CR-REase7+TM+TM+TM | 1492 | BECKFW1821A_GA0114235_109218 | Gamma  | Candidatus Kentron sp. FW | GTPase SAR1 family protein [Candidatus Kentron sp. FW].                                     | -   |
| VFJ60987.1 | AP-GTPase+COR+TM+TM*→                         | AP-GTPase+COR+TM+TM                         | 889  | BECKFM1743C_GA0114222_102852 | Gamma  | Candidatus Kentron sp. FM | Ras of Complex, Roc, domain of DAPkinase [Candidatus Kentron sp. FM].                       | -   |
| VFJ61225.1 | AP-GTPase+COR+TM+TM*→                         | AP-GTPase+COR+TM+TM                         | 683  | BECKDK2373B_GA0170837_109045 | Gamma  | Candidatus Kentron sp. DK | Ras of Complex, Roc, domain of DAPkinase, partial [Candidatus Kentron sp. DK].              | -   |
| VFJ62038.1 | AP-GTPase+COR+TM+TM*→                         | AP-GTPase+COR+TM+TM                         | 843  | BECKFW1821B_GA0114236_106044 | Gamma  | Candidatus Kentron sp. FW | GTPase SAR1 family protein [Candidatus Kentron sp. FW].                                     | -   |
| VFJ65256.1 | AP-GTPase+COR+TM+TM*→                         | AP-GTPase+COR+TM+TM                         | 523  | BECKFW1821A_GA0114235_119611 | Gamma  | Candidatus Kentron sp. FW | hypothetical protein BECKFW1821A_GA0114235_119611, partial [Candidatus Kentron sp. FW].     | -   |
| VFJ68931.1 | AP-GTPase+COR+TM+TM*→                         | AP-GTPase+COR+TM+TM                         | 948  | BECKFM1743C_GA0114222_105044 | Gamma  | Candidatus Kentron sp. FM | Ras of Complex, Roc, domain of DAPkinase [Candidatus Kentron sp. FM].                       | -   |
| VFJ70290.1 | AP-GTPase+COR+TM+TM*→                         | AP-GTPase+COR+TM+TM                         | 787  | BECKFM1743C_GA0114222_105044 | Gamma  | Candidatus Kentron sp. FM | Ras of Complex, Roc, domain of DAPkinase [Candidatus Kentron sp. FM].                       | -   |
| VFJ72898.1 | AP-GTPase+COR+NACHT*→                         | AP-GTPase+COR+NACHT                         | 1882 | BECKFW1821C_GA0114237_104047 | Gamma  | Candidatus Kentron sp. FW | Pentapeptide repeat-containing protein [Candidatus Kentron sp. FW].                         | -   |
| VFJ73192.1 | AP-GTPase+COR+TM+TM*→                         | AP-GTPase+COR+TM+TM                         | 770  | BECKFW1821C_GA0114237_104047 | Gamma  | Candidatus Kentron sp. FW | GTPase SAR1 family protein, partial [Candidatus Kentron sp. FW].                            | -   |
| VFJ76094.1 | AP-GTPase+COR+TM+TM*→                         | AP-GTPase+COR+TM+TM                         | 834  | BECKFW1821C_GA0114237_109047 | Gamma  | Candidatus Kentron sp. FW | GTPase SAR1 family protein [Candidatus Kentron sp. FW].                                     | -   |
| VFJ95876.1 | AP-GTPase+COR+TM+TM*→                         | AP-GTPase+COR+TM+TM                         | 753  | BECKH772A_GA0070896_1009310  | Gamma  | Candidatus Kentron sp. H  | Ras of Complex, Roc, domain of DAPkinase, partial [Candidatus Kentron sp. H].               | -   |

| acc        | operon                                                                                                                                     | architecture        | len | gen.name                      | taxend              | species                     | define                                                                                     | gca |
|------------|--------------------------------------------------------------------------------------------------------------------------------------------|---------------------|-----|-------------------------------|---------------------|-----------------------------|--------------------------------------------------------------------------------------------|-----|
| VFK01091.1 | AP-GTPase+COR*→                                                                                                                            | AP-GTPase+COR       | 275 | BECKLFY1418B_GA0070995_1277   | Gammaproteobacteria | Candidatus Kentron sp. LFY  | Ras of Complex, Roc, domain of DAPkinase, partial [Candidatus Kentron sp. LFY].            | -   |
| VFK03671.1 | AP-GTPase*→                                                                                                                                | AP-GTPase           | 118 | BECKLFY1418A_GA0070994_1313   | Gammaproteobacteria | Candidatus Kentron sp. LFY  | Ras of Complex, Roc, domain of DAPkinase, partial [Candidatus Kentron sp. LFY].            | -   |
| VFK03687.1 | AP-GTPase*→                                                                                                                                | AP-GTPase           | 118 | BECKLFY1418A_GA0070994_1312   | Gammaproteobacteria | Candidatus Kentron sp. LFY  | Ras of Complex, Roc, domain of DAPkinase, partial [Candidatus Kentron sp. LFY].            | -   |
| VFK04035.1 | AP-GTPase+COR+TM+TM*→                                                                                                                      | AP-GTPase+COR+TM+TM | 677 | BECKH772B_GA0070898_104021    | Gammaproteobacteria | Candidatus Kentron sp. H    | Ras of Complex, Roc, domain of DAPkinase, partial [Candidatus Kentron sp. H].              | -   |
| VFK07263.1 | AP-GTPase+COR+TM+TM*→                                                                                                                      | AP-GTPase+COR+TM+TM | 674 | BECKH772C_GA0070978_104041    | Gammaproteobacteria | Candidatus Kentron sp. H    | Ras of Complex, Roc, domain of DAPkinase, partial [Candidatus Kentron sp. H].              | -   |
| VFK11049.1 | AP-GTPase+COR+TM+TM*→                                                                                                                      | AP-GTPase+COR+TM+TM | 865 | BECKLPF1236A_GA0070988_100386 | Gammaproteobacteria | Candidatus Kentron sp. LPFa | Ras of Complex, Roc, domain of DAPkinase [Candidatus Kentron sp. LPFa].                    | -   |
| VFK19789.1 | AP-GTPase+COR+TM+TM*→                                                                                                                      | AP-GTPase+COR+TM+TM | 853 | BECKLPF1236B_GA0070989_11862  | Gammaproteobacteria | Candidatus Kentron sp. LPFa | Ras of Complex, Roc, domain of DAPkinase [Candidatus Kentron sp. LPFa].                    | -   |
| VFK19871.1 | AP-GTPase*→                                                                                                                                | AP-GTPase           | 161 | BECKLFY1418C_GA0070996_10628  | Gammaproteobacteria | Candidatus Kentron sp. LFY  | small GTP-binding protein domain-containing protein, partial [Candidatus Kentron sp. LFY]. | -   |
| VFK26330.1 | AP-GTPase*→                                                                                                                                | AP-GTPase           | 116 | BECKLFY1418C_GA0070996_1333   | Gammaproteobacteria | Candidatus Kentron sp. LFY  | Ras of Complex, Roc, domain of DAPkinase, partial [Candidatus Kentron sp. LFY].            | -   |
| VFK27413.1 | AP-GTPase+COR+TM+TM*→ CR-ATPase8+CR-REase7→ CR-ATPase8+CR-REase7→ CR-ATPase8+CR-REase7→ CR-ATPase8+CR-REase7→?→  <-?<-ParA-Soj-PloopNTPase | AP-GTPase+COR+TM+TM | 893 | BECKMB1821I_GA0114274_100304  | Gammaproteobacteria | Candidatus Kentron sp. MB   | Ras of Complex, Roc, domain of DAPkinase [Candidatus Kentron sp. MB].                      | -   |
| VFK29755.1 | AP-GTPase+COR+TM+TM*→ AP-GTPase+COR+TM+TM→                                                                                                 | AP-GTPase+COR+TM+TM | 840 | BECKMB1821G_GA0114241_10587   | Gammaproteobacteria | Candidatus Kentron sp. MB   | Ras of Complex, Roc, domain of DAPkinase [Candidatus Kentron sp. MB].                      | -   |
| VFK30623.1 | AP-GTPase+COR+TM+TM*→ CR-ATPase8+CR-REase7→ CR-ATPase8+CR-REase7→ CR-ATPase8+CR-REase7→ CR-ATPase8+CR-REase7→?→  <-?<-ParA-Soj-PloopNTPase | AP-GTPase+COR+TM+TM | 718 | BECKMB1821G_GA0114241_10661   | Gammaproteobacteria | Candidatus Kentron sp. MB   | hypothetical protein BECKMB1821G_GA0114241_10681, partial [Candidatus Kentron sp. MB].     | -   |
| VFK30872.1 | AP-GTPase+COR+TM+TM*→                                                                                                                      | AP-GTPase+COR+TM+TM | 680 | BECKMB1821G_GA0114241_10721   | Gammaproteobacteria | Candidatus Kentron sp. MB   | hypothetical protein BECKMB1821G_GA0114241_10721, partial [Candidatus Kentron sp. MB].     | -   |
| VFK31841.1 | AP-GTPase*→                                                                                                                                | AP-GTPase           | 476 | BECKMB1821I_GA0114274_10276   | Gammaproteobacteria | Candidatus Kentron sp. MB   | Ras of Complex, Roc, domain of DAPkinase [Candidatus Kentron sp. MB].                      | -   |
| VFK32767.1 | AP-GTPase+COR+TM+TM*→                                                                                                                      | AP-GTPase+COR+TM+TM | 875 | BECKMB1821I_GA0114274_10366   | Gammaproteobacteria | Candidatus Kentron sp. MB   | Ras of Complex, Roc, domain of DAPkinase [Candidatus Kentron sp. MB].                      | -   |
| VFK33354.1 | AP-GTPase+COR+TM+TM*→                                                                                                                      | AP-GTPase+COR+TM+TM | 844 | BECKMB1821I_GA0114274_10446   | Gammaproteobacteria | Candidatus Kentron sp. MB   | Ras of Complex, Roc, domain of DAPkinase [Candidatus Kentron sp. MB].                      | -   |

| acc        | operon                                     | architecture                             | len  | gen.name                       | taxend              | species                    | define                                                                                                       | gca |
|------------|--------------------------------------------|------------------------------------------|------|--------------------------------|---------------------|----------------------------|--------------------------------------------------------------------------------------------------------------|-----|
| VFK39913.1 | AP-GTPase+COR+TM+TM*→                      | AP-GTPase+COR+TM+TM                      | 790  | BECKTC1821D_GA0114238_100746   | Gammaproteobacteria | Candidatus Kentron sp. TC  | Ras of Complex, Roc, domain of DAPkinase [Candidatus Kentron sp. TC].                                        | -   |
| VFK39956.1 | RADICAL-SAM→ AP-GTPase+COR*→               | AP-GTPase+COR                            | 694  | BECKSD772F_GA0070984_105016    | Gammaproteobacteria | Candidatus Kentron sp. SD  | GTPase SAR1 family protein [Candidatus Kentron sp. SD].                                                      | -   |
| VFK40684.1 | AP-GTPase+COR+TM+TM*→                      | AP-GTPase+COR+TM+TM                      | 854  | BECKSD772F_GA0070984_10665     | Gammaproteobacteria | Candidatus Kentron sp. SD  | Ras of Complex, Roc, domain of DAPkinase [Candidatus Kentron sp. SD].                                        | -   |
| VFK42825.1 | AP-GTPase+COR+TM+TM*→                      | AP-GTPase+COR+TM+TM                      | 834  | BECKTC1821E_GA0114239_102104   | Gammaproteobacteria | Candidatus Kentron sp. TC  | Ras of Complex, Roc, domain of DAPkinase [Candidatus Kentron sp. TC].                                        | -   |
| VFK53024.1 | AP-GTPase+COR+TM+TM*→                      | AP-GTPase+COR+TM+TM                      | 852  | BECK-TUN1418D_GA0071000_101730 | Gammaproteobacteria | Candidatus Kentron sp. TUN | Ras of Complex, Roc, domain of DAPkinase [Candidatus Kentron sp. TUN].                                       | -   |
| VFK54740.1 | AP-GTPase+COR+TM+TM*→                      | AP-GTPase+COR+TM+TM                      | 851  | BECK-TUN1418F_GA0071002_10532  | Gammaproteobacteria | Candidatus Kentron sp. TUN | GTPase SAR1 family protein [Candidatus Kentron sp. TUN].                                                     | -   |
| VFK54787.1 | CR-ATPase8+CR-REase7+AP-GTPase+COR+TM+TM*→ | CR-ATPase8+CR-REase7+AP-GTPase+COR+TM+TM | 1117 | BECK-TUN1418F_GA0071002_105513 | Gammaproteobacteria | Candidatus Kentron sp. TUN | Ras of Complex, Roc, domain of DAPkinase [Candidatus Kentron sp. TUN].                                       | -   |
| VFK55234.1 | AP-GTPase+COR+TM+TM*→                      | AP-GTPase+COR+TM+TM                      | 870  | BECK-TUN1418D_GA0071000_102911 | Gammaproteobacteria | Candidatus Kentron sp. TUN | GTPase SAR1 family protein [Candidatus Kentron sp. TUN].                                                     | -   |
| VFK55404.1 | AP-GTPase+COR+TM+TM*→ AP-GTPase+COR+TM+TM→ | AP-GTPase+COR+TM+TM                      | 834  | BECK-TUN1418E_GA0071001_10293  | Gammaproteobacteria | Candidatus Kentron sp. TUN | Ras of Complex, Roc, domain of DAPkinase [Candidatus Kentron sp. TUN].                                       | -   |
| VFK57219.1 | AP-GTPase+COR+TM+TM*→                      | AP-GTPase+COR+TM+TM                      | 799  | BECKTC1821F_GA0114240_101506   | Gammaproteobacteria | Candidatus Kentron sp. TC  | Ras of Complex, Roc, domain of DAPkinase [Candidatus Kentron sp. TC].                                        | -   |
| VFK57233.1 | AP-GTPase+COR*→                            | AP-GTPase+COR                            | 1361 | BECK-TUN1418F_GA0071002_11091  | Gammaproteobacteria | Candidatus Kentron sp. TUN | Uncharacterized conserved protein, contains ParB-like and HNH nuclease domains [Candidatus Kentron sp. TUN]. | -   |
| VFK58480.1 | AP-GTPase+COR*→                            | AP-GTPase+COR                            | 1384 | BECK-TUN1418D_GA0071000_10836  | Gammaproteobacteria | Candidatus Kentron sp. TUN | Ras of Complex, Roc, domain of DAPkinase [Candidatus Kentron sp. TUN].                                       | -   |
| VFK60758.1 | CR-ATPase8+CR-REase7+AP-GTPase*→           | CR-ATPase8+CR-REase7+AP-GTPase           | 877  | BECK-UNK1418G_GA0071005_101311 | Gammaproteobacteria | Candidatus Kentron sp. UNK | PD-(D/E)XK nuclease superfamily protein [Candidatus Kentron sp. UNK].                                        | -   |
| VFK62743.1 | AP-GTPase*→                                | AP-GTPase                                | 337  | BECK-TUN1418D_GA0071000_11856  | Gammaproteobacteria | Candidatus Kentron sp. TUN | Ras of Complex, Roc, domain of DAPkinase, partial [Candidatus Kentron sp. TUN].                              | -   |
| VFK65329.1 | AP-GTPase+COR*→                            | AP-GTPase+COR                            | 1361 | BECK-TUN1418E_GA0071001_11051  | Gammaproteobacteria | Candidatus Kentron sp. TUN | Uncharacterized conserved protein, contains ParB-like and HNH nuclease domains [Candidatus Kentron sp. TUN]. | -   |
| VFK67825.1 | BetaPropeller+AP-GTPase*→                  | BetaPropeller+AP-GTPase                  | 526  | BECK-UNK1418G_GA0071005_11685  | Gammaproteobacteria | Candidatus Kentron sp. UNK | WD domain-containing protein, G-beta repeat-containing protein [Candidatus Kentron sp. UNK].                 | -   |
| VFK67855.1 | AP-GTPase+COR+TM+TM*→                      | AP-GTPase+COR+TM+TM                      | 598  | BECK-UNK1418G_GA0071005_11705  | Gammaproteobacteria | Candidatus Kentron sp. UNK | Ras of Complex, Roc, domain of DAPkinase [Candidatus Kentron sp. UNK].                                       | -   |

| acc            | operon                                                               | architecture                   | len  | gen.name                   | taxend              | species                                  | define                                                                          | gca             |
|----------------|----------------------------------------------------------------------|--------------------------------|------|----------------------------|---------------------|------------------------------------------|---------------------------------------------------------------------------------|-----------------|
| VFK77412.1     | AP-GTPase+COR+TM+TM*→                                                | AP-GTPase+COR+TM+TM            | 734  | BECKMB1821H_GA0114242_1136 | Gammaproteobacteria | Candidatus Kentron sp. MB                | Ras of Complex, Roc, domain of DAPkinase, partial [Candidatus Kentron sp. MB].  | -               |
| VFK80164.1     | AP-GTPase+COR+TM+TM*→                                                | AP-GTPase+COR+TM+TM            | 872  | BECKSD772D_GA0070982_10897 | Gammaproteobacteria | Candidatus Kentron sp. SD                | Ras of Complex, Roc, domain of DAPkinase [Candidatus Kentron sp. SD].           | -               |
| VFM99483.1     | AP-GTPase+COR+TM+TM*→                                                | AP-GTPase+COR+TM+TM            | 725  | BECKG1743F_GA0114225_10402 | Gammaproteobacteria | Candidatus Kentron sp. G                 | GTPase SAR1 family protein [Candidatus Kentron sp. G].                          | GCA_900696175.1 |
| VFM99853.1     | AP-GTPase+COR+TM+TM*→                                                | AP-GTPase+COR+TM+TM            | 744  | BECKG1743F_GA0114225_10433 | Gammaproteobacteria | Candidatus Kentron sp. G                 | small GTP-binding protein domain-containing protein [Candidatus Kentron sp. G]. | GCA_900696175.1 |
| WP_002684219.1 | AP-GTPase+COR+DUF4404*→                                              | AP-GTPase+COR+DUF4404          | 883  | -                          | Gammaproteobacteria | Beggiatoa alba                           | Miro-like protein [Beggiatoa alba].                                             | GCF_000245015.1 |
| WP_009138084.1 | AP-GTPase+COR*→                                                      | AP-GTPase+COR                  | 843  | -                          | Bacteroidetes       | Odoribacter laneus                       | hypothetical protein [Odoribacter laneus].                                      | GCF_902374615.1 |
| WP_012499245.1 | AP-GTPase*→                                                          | AP-GTPase                      | 394  | -                          | Chlorobi            | Chloroherpeton thalassium                | Miro domain-containing protein [Chloroherpeton thalassium].                     | GCF_000020525.1 |
| WP_020559412.1 | GTPase-AIG→ ABC-ATPase→ SIG+TM+TM+TM+TM→ AP-GTPase+COR*→             | AP-GTPase+COR                  | 833  | -                          | Gammaproteobacteria | Thiofilum flexile                        | hypothetical protein [Thiofilum flexile].                                       | GCF_000380185.1 |
| WP_027001878.1 | AP-GTPase+COR*→                                                      | AP-GTPase+COR                  | 754  | -                          | Bacteroidetes       | Hugenholtzia roseola                     | hypothetical protein [Hugenholtzia roseola].                                    | GCF_000422585.1 |
| WP_040612090.1 | AP-GTPase+COR*→                                                      | AP-GTPase+COR                  | 849  | -                          | Bacteroidetes       | Odoribacter laneus                       | hypothetical protein [Odoribacter laneus].                                      | -               |
| WP_050025079.1 | VWA+AP-GTPase+COR+EAD1+Trypsin*→                                     | VWA+AP-GTPase+COR+EAD1+Trypsin | 1458 | -                          | Verrucomicrobia     | Verrucomicrobium sp. BvORR034            | GTP-binding protein [Verrucomicrobium sp. BvORR034].                            | -               |
| WP_052368940.1 | TIR+BetaPropeller+AP-GTPase*→                                        | TIR+BetaPropeller+AP-GTPase    | 1107 | -                          | Euryarchaeota       | Candidatus Methanoperedens nitroreducens | TIR domain-containing protein [Candidatus Methanoperedens nitroreducens].       | GCF_000685155.1 |
| WP_071819957.1 | TIR+BetaPropeller+AP-GTPase*→  <-?<-?<-?<-?<-?<-RuvB-AAA+RuvB-HTH    | TIR+BetaPropeller+AP-GTPase    | 1449 | -                          | Cyanobacteria       | Acaryochloris marina                     | TIR domain-containing protein [Acaryochloris marina].                           | GCF_000018105.1 |
| WP_077027722.1 | <-Phytase-like  ?→?→ tRNA→  <-?<-?<-?  TIR+BetaPropeller+AP-GTPase*→ | TIR+BetaPropeller+AP-GTPase    | 1401 | -                          | Planctomycetes      | Fuerstia marisgermanicae                 | TIR domain-containing protein [Fuerstia marisgermanicae].                       | GCF_001983935.1 |
| WP_081716878.1 | AP-GTPase+COR+TIR*→                                                  | AP-GTPase+COR+TIR              | 722  | -                          | Cyanobacteria       | Leptolyngbya sp. Heron Island J          | TIR domain-containing protein [Leptolyngbya sp. Heron Island J].                | -               |
| WP_081891667.1 | AP-GTPase+COR+TIR*→                                                  | AP-GTPase+COR+TIR              | 825  | -                          | Verrucomicrobia     | Verrucomicrobium sp. BvORR106            | TIR domain-containing protein [Verrucomicrobium sp. BvORR106].                  | -               |
| WP_083888126.1 | AP-GTPase*→                                                          | AP-GTPase                      | 116  | -                          | Cyanobacteria       | Oscillatoria nigro-viridis               | hypothetical protein [Oscillatoria nigro-viridis].                              | -               |
| WP_093066994.1 | AP-GTPase+COR*→                                                      | AP-GTPase+COR                  | 857  | -                          | Gammaproteobacteria | Thiothrix caldifontis                    | hypothetical protein [Thiothrix caldifontis].                                   | GCF_900107695.1 |
| WP_093068668.1 | AP-GTPase+COR*→                                                      | AP-GTPase+COR                  | 960  | -                          | Gammaproteobacteria | Thiothrix caldifontis                    | hypothetical protein [Thiothrix caldifontis].                                   | GCF_900107695.1 |
| WP_093882803.1 | SIG+AP-GTPase+COR*→                                                  | SIG+AP-GTPase+COR              | 880  | -                          | Deltaproteobacteria | Syntrophus gentianae                     | hypothetical protein [Syntrophus gentianae].                                    | GCF_900109885.1 |
| WP_103921835.1 | HTH→ AP-GTPase+COR*→                                                 | AP-GTPase+COR                  | 576  | -                          | Gammaproteobacteria | Thiotrichales bacterium HS_08            | hypothetical protein [Thiotrichales bacterium HS_08].                           | -               |
| WP_129026230.1 | AP-GTPase+COR*→                                                      | AP-GTPase+COR                  | 431  | -                          | Bacteroidetes       | Flavobacterium sp. YO12                  | hypothetical protein [Flavobacterium sp. YO12].                                 | GCF_004119495.1 |

| acc            | operon                                                                                 | architecture                                      | len  | gen.name | taxend                | species                                   | defline                                                          | gca             |
|----------------|----------------------------------------------------------------------------------------|---------------------------------------------------|------|----------|-----------------------|-------------------------------------------|------------------------------------------------------------------|-----------------|
| WP_137245090.1 | TM+AP-GTPase*→                                                                         | TM+AP-GTPase                                      | 93   | -        | Actinobacteria        | Herbidospora galbida                      | hypothetical protein [Herbidospora galbida].                     | GCF_005233835.1 |
| WP_139373135.1 | AP-GTPase*→                                                                            | AP-GTPase                                         | 134  | -        | Verrucomicrobia       | Prostheco bacter debontii                 | hypothetical protein [Prostheco bacter debontii].                | GCF_900167535.1 |
| WP_140311973.1 | AP-GTPase+COR*→                                                                        | AP-GTPase+COR                                     | 697  | -        | Gammaproteobacteria   | Vibrio parahaemolyticus                   | GTP-binding protein, partial [Vibrio parahaemolyticus].          | GCF_006372615.1 |
| WP_144982131.1 | TIR+APATPase+TPR+TPR+TPR→?→ AP-GTPase+COR+DUF4404*→                                    | AP-GTPase+COR+DUF4404                             | 692  | -        | Planctomycetes        | Gimesia aquarii                           | hypothetical protein [Gimesia aquarii].                          | GCF_007748195.1 |
| WP_145384506.1 | AP-GTPase+COR*→                                                                        | AP-GTPase+COR                                     | 680  | -        | Planctomycetes        | Stieleria neptunia                        | 50S ribosome-binding GTPase [Stieleria neptunia].                | GCF_007754155.1 |
| WP_146054573.1 | AP-GTPase+COR+DUF4404*→                                                                | AP-GTPase+COR+DUF4404                             | 731  | -        | Gammaproteobacteria   | Methylovulum psychrotolerans              | hypothetical protein [Methylovulum psychrotolerans].             | GCF_002923755.1 |
| WP_147662502.1 | AP-GTPase*→                                                                            | AP-GTPase                                         | 204  | -        | Asgard group          | Candidatus Prometheoarchaeum syntrophicum | GTP-binding protein [Candidatus Prometheoarchaeum syntrophicum]. | GCF_008000775.1 |
| WP_157679487.1 | AP-GTPase+COR+DUF4404*→                                                                | AP-GTPase+COR+DUF4404                             | 911  | -        | Gammaproteobacteria   | Methylovulum psychrotolerans              | hypothetical protein [Methylovulum psychrotolerans].             | GCF_002209385.1 |
| WP_157817021.1 | <-EAD10+VMAP-M1+VMAP-C  ?→  <-PSE  BetaPropeller+AP-GTPase+Calcineurin+CASPASE+NACHT*→ | BetaPropeller+AP-GTPase+Calcineurin+CASPASE+NACHT | 1731 | -        | Cyanobacteria         | Nostoc flagelliforme                      | NACHT domain-containing protein [Nostoc flagelliforme].          | GCF_002813575.1 |
| WP_160572809.1 | AP-GTPase+COR+DUF4404*→                                                                | AP-GTPase+COR+DUF4404                             | 720  | -        | unclassified Bacteria | bacterium D16-29                          | GTP-binding protein [bacterium D16-29].                          | -               |
| WP_162669385.1 | AP-GTPase+COR+DUF4404*→                                                                | AP-GTPase+COR+DUF4404                             | 615  | -        | Planctomycetes        | Gemmata massiliana                        | hypothetical protein [Gemmata massiliana].                       | GCF_901538265.1 |
| WP_170962814.1 | AP-GTPase+COR*→                                                                        | AP-GTPase+COR                                     | 453  | -        | Gammaproteobacteria   | Vibrio sp. F13                            | GTP-binding protein [Vibrio sp. F13].                            | GCF_005146615.1 |
| WP_173978580.1 | TIR+BetaPropeller+AP-GTPase*→                                                          | TIR+BetaPropeller+AP-GTPase                       | 1154 | -        | Alphaproteobacteria   | Magnetospirillum sp. UT-4                 | TIR domain-containing protein [Magnetospirillum sp. UT-4].       | GCF_902729435.1 |
| WP_175453917.1 | AP-GTPase+COR*→                                                                        | AP-GTPase+COR                                     | 757  | -        | Firmicutes            | Sarcina sp. DSM 11001                     | GTP-binding protein, partial [Sarcina sp. DSM 11001].            | GCF_900101015.1 |
| WP_177428378.1 | AP-GTPase+COR+CR-ATPase9*→                                                             | AP-GTPase+COR+CR-ATPase9                          | 880  | -        | Gammaproteobacteria   | Thiotrichales bacterium HS_08             | hypothetical protein [Thiotrichales bacterium HS_08].            | -               |
| WP_179276996.1 | BetaPropeller+AP-GTPase+TIR*→                                                          | BetaPropeller+AP-GTPase+TIR                       | 996  | -        | Actinobacteria        | Actinoplanes regularis                    | TIR domain-containing protein [Actinoplanes regularis].          | GCF_016862355.1 |
| WP_180983884.1 | AP-GTPase+COR*→                                                                        | AP-GTPase+COR                                     | 676  | -        | Gammaproteobacteria   | Vibrio agarivorans                        | 50S ribosome-binding GTPase, partial [Vibrio agarivorans].       | GCF_002894965.1 |
| WP_186289598.1 | AP-GTPase+COR+TM+TM*→                                                                  | AP-GTPase+COR+TM+TM                               | 905  | -        | Gammaproteobacteria   | Methylomonas koyamae                      | hypothetical protein [Methylomonas koyamae].                     | GCF_006483455.1 |

Gene neighborhoods and domain architectures of the bacterial and prophage/phage SPRY domain

| acc          | operon                                                                                                                    | architecture | len | gen.name    | taxend             | species                              | define                                                                         | gca             |
|--------------|---------------------------------------------------------------------------------------------------------------------------|--------------|-----|-------------|--------------------|--------------------------------------|--------------------------------------------------------------------------------|-----------------|
| ACF52192.1   | Phage_connect_1→Phage_H_T_join→HK97-gp10_like→DUF3168→Phage_TTP_11→Phage_TAC_13→?→SPRY+X*→?→Phage-tail-tape→              | SPRY+X       | 655 | Smal_2491   | Gamma              | Stenotrophomonas maltophilia R551-3  | hypothetical protein Smal_2491 [Stenotrophomonas maltophilia R551-3].          | GCA_000020665.1 |
| ASA22786.1   | SUN→SPRY+SUN*→SUN→Laminin_G_3→Disaggr_repeat→Phage_holin_4_1→                                                             | SPRY+SUN     | 358 | B9T62_19455 | Firmicutes         | Paenibacillus donghaensis            | hypothetical protein B9T62_19455 [Paenibacillus donghaensis].                  | GCA_002192415.1 |
| CAA2107092.1 | TM+PhageMin_Tail→?→?→?→?→SPRY*→                                                                                           | SPRY         | 456 | VVAX_04063  | Betaproteobacteria | Variovorax paradoxus                 | hypothetical protein VVAX_04063 [Variovorax paradoxus].                        | -               |
| CAA2108205.1 | TM+PhageMin_Tail→?→?→?→?→SPRY*→                                                                                           | SPRY         | 455 | VVAX_04716  | Betaproteobacteria | Variovorax paradoxus                 | hypothetical protein VVAX_04716 [Variovorax paradoxus].                        | -               |
| EJP76868.1   | Phage_connect_1→Phage_H_T_join→HK97-gp10_like→DUF3168→Phage_TTP_11→Phage_TAC_13→?→SPRY+X*→?→Phage-tail-tape→ConA-repeats→ | SPRY+X       | 658 | A1OC_01671  | Gamma              | Stenotrophomonas maltophilia Ab55555 | hypothetical protein A1OC_01671 [Stenotrophomonas maltophilia Ab55555].        | GCA_000287935.1 |
| HAG44903.1   | SPRY*→SPRY→SUN→                                                                                                           | SPRY         | 249 | DCL31_18225 | Firmicutes         | Clostridium sp.                      | TPA: hypothetical protein DCL31_18225 [Clostridium sp.].                       | GCA_003451415.1 |
| HAU79614.1   | Phage_H_T_join→HK97-gp10_like→DUF3168→Phage_TTP_11→Phage_TAC_13→?→SPRY+X*→  <-?  ?→?→?→Phage-tail-tape→                   | SPRY+X       | 655 | DCW96_02920 | Gamma              | Stenotrophomonas sp.                 | TPA: hypothetical protein DCW96_02920 [Stenotrophomonas sp.].                  | GCA_003484865.1 |
| HBC50726.1   | Phage_connect_1→Phage_H_T_join→HK97-gp10_like→DUF3168→Phage_TTP_11→Phage_TAC_13→?→SPRY*→                                  | SPRY         | 169 | DC051_05805 | Gamma              | Stenotrophomonas maltophilia         | TPA: hypothetical protein DC051_05805, partial [Stenotrophomonas maltophilia]. | GCA_003487985.1 |
| HBJ00556.1   | SPRY*→SUN→                                                                                                                | SPRY         | 221 | DDY89_06200 | Firmicutes         | Lysinibacillus sp.                   | TPA: hypothetical protein DDY89_06200, partial [Lysinibacillus sp.].           | GCA_003507435.1 |
| HBJ00935.1   | SPRY*→                                                                                                                    | SPRY         | 146 | DDY89_08865 | Firmicutes         | Lysinibacillus sp.                   | TPA: hypothetical protein DDY89_08865, partial [Lysinibacillus sp.].           | GCA_003507435.1 |

| acc          | operon                                                                                                                            | architecture | len  | gen.name        | taxend                | species                                         | define                                                                                    | gca             |
|--------------|-----------------------------------------------------------------------------------------------------------------------------------|--------------|------|-----------------|-----------------------|-------------------------------------------------|-------------------------------------------------------------------------------------------|-----------------|
| HBS54551.1   | Phage_connect_1→ Phage_H_T_join→ HK97-gp10_like→ DUF3168→ Phage_TTP_11→ Phage_TAC_13→?→ SPRY+X*→?→ Phage-tail-tape→ ConA-repeats→ | SPRY+X       | 655  | DEA38_02315     | Gammaproteobacteria   | Stenotrophomonas sp.                            | TPA: hypothetical protein DEA38_02315 [Stenotrophomonas sp.].                             | GCA_003510825.1 |
| HBT70779.1   | DISCOIDIN→ SUN→ SPRY*→                                                                                                            | SPRY         | 169  | DEB37_00445     | Firmicutes            | Lysinibacillus sp.                              | TPA: hypothetical protein DEB37_00445, partial [Lysinibacillus sp.].                      | GCA_003510425.1 |
| HDO36693.1   | Cluster187_2clades→?→ Cluster187_2clades→?→ SPRY+SPRY*→                                                                           | SPRY+SPRY    | 913  | ENH07_10435     | Nitrospirae           | Nitrospirae bacterium                           | TPA: hypothetical protein ENH07_10435 [Nitrospirae bacterium].                            | GCA_011041165.1 |
| HHG11560.1   | SPRY+LisH*→                                                                                                                       | SPRY+LisH    | 821  | ENL98_17835     | unclassified Bacteria | bacterium                                       | TPA: hypothetical protein ENL98_17835 [bacterium].                                        | GCA_011373825.1 |
| HHG11879.1   | SIG+SPRY*→                                                                                                                        | SIG+SPRY     | 553  | ENL98_19440     | unclassified Bacteria | bacterium                                       | TPA: hypothetical protein ENL98_19440 [bacterium].                                        | GCA_011373825.1 |
| KAB2901287.1 | SPRY*→                                                                                                                            | SPRY         | 854  | F9K31_02560     | Gammaproteobacteria   | Dokdonella sp.                                  | hypothetical protein F9K31_02560 [Dokdonella sp.].                                        | GCA_008933665.1 |
| KAF6631785.1 | <-Polbetant  ACET→ Cupin_2→ ABhydrolase→  <-?-DUF2935  SIG+SPRY*→                                                                 | SIG+SPRY     | 323  | H6F38_13125     | Firmicutes            | Paenibacillus sp. EKM208P                       | hypothetical protein H6F38_13125 [Paenibacillus sp. EKM208P].                             | GCA_011066295.1 |
| KGM23936.1   | DUF3168→ Phage_TTP_11→ Phage_TAC_13→?→ SPRY+X*→?→?→ Phage-tail-tape→ ConA-repeats→                                                | SPRY+X       | 657  | LI87_0109275    | Gammaproteobacteria   | Stenotrophomonas maltophilia                    | hypothetical protein LI87_0109275 [Stenotrophomonas maltophilia].                         | GCA_000758465.1 |
| KHS06610.1   | Phage-tail-tape→?→?→?→?→ SPRY+X*→?→ DAM→                                                                                          | SPRY+X       | 658  | RM61_15205      | Gammaproteobacteria   | Xanthomonas phaseoli pv. phaseoli               | hypothetical protein RM61_15205 [Xanthomonas phaseoli pv. phaseoli].                      | GCA_000807875.2 |
| KKW33547.1   | SIG+SPRY*→                                                                                                                        | SIG+SPRY     | 838  | UY79_C0020G0005 | Bacteria              | Parcubacteria group bacterium GW2011_GWA2_53_21 | Filamentous hemagglutinin-like protein [Parcubacteria group bacterium GW2011_GWA2_53_21]. | GCA_001004625.1 |
| KOS00949.1   | SPRY*→                                                                                                                            | SPRY         | 155  | AM598_20185     | Firmicutes            | Paenibacillus polymyxa                          | hypothetical protein AM598_20185, partial [Paenibacillus polymyxa].                       | GCA_001277855.1 |
| KZT13763.1   | SPRY*→?→?→?→ DAM→                                                                                                                 | SPRY         | 449  | A1D30_21880     | Betaproteobacteria    | Acidovorax sp. GW101-3H11                       | hypothetical protein A1D30_21880 [Acidovorax sp. GW101-3H11].                             | GCA_001633105.1 |
| MAE42393.1   | SIG+TM+TM+IG*→                                                                                                                    | SIG+TM+TM+IG | 1722 | CMO93_01365     | DPANN group           | Candidatus Woesearchaeota archaeon              | hypothetical protein CMO93_01365, partial [Candidatus Woesearchaeota archaeon].           | GCA_002686855.1 |

| acc          | operon                                                                                                                                              | architecture                 | len | gen.name     | taxend              | species                      | define                                                                    | gca             |
|--------------|-----------------------------------------------------------------------------------------------------------------------------------------------------|------------------------------|-----|--------------|---------------------|------------------------------|---------------------------------------------------------------------------|-----------------|
| MAH29320.1   | Laminin_G_3+SPRY*→ Cluster74_6clades→                                                                                                               | Laminin_G_3+SPRY             | 903 | CL959_01385  | Euryarchaeota       | Euryarchaeota archaeon       | hypothetical protein CL959_01385 [Euryarchaeota archaeon].                | GCA_002689085.1 |
| MAL42735.1   | SPRY*→?→ Cluster388_2clades→                                                                                                                        | SPRY                         | 473 | CME98_01825  | Alphaproteobacteria | Hyphomonas sp.               | hypothetical protein CME98_01825 [Hyphomonas sp.].                        | GCA_002692925.1 |
| MAN64718.1   | LamG→ Laminin_G_3+SPRY*→ Cluster74_6clades→ Cluster153_2clades→                                                                                     | Laminin_G_3+SPRY             | 671 | CMI60_22525  | Alphaproteobacteria | Parvibaculum sp.             | hypothetical protein CMI60_22525 [Parvibaculum sp.].                      | GCA_002695905.1 |
| MAT11680.1   | Phage_T7_tail→ Cluster93_5clades→ Laminin_G_3+Laminin_G_3+SPRY*→ Cluster74_6clades→                                                                 | Laminin_G_3+Laminin_G_3+SPRY | 921 | CMM02_11805  | Planctomycetes      | Rhodopirellula sp.           | hypothetical protein CMM02_11805 [Rhodopirellula sp.].                    | GCA_002698965.1 |
| MAU75364.1   | Laminin_G_3+SPRY*→ Cluster74_6clades→                                                                                                               | Laminin_G_3+SPRY             | 630 | CL831_00645  | Bacteroidetes       | Crocinitomicaceae bacterium  | hypothetical protein CL831_00645 [Crocinitomicaceae bacterium].           | GCA_002700285.1 |
| MBA0297283.1 | Phage-tail-tape→ ConA-repeats→?→ SPRY+X*→?→?→?→?→ SIG+TM+TM+TM+TM+TM+TM+TM+TM→ ABC-ATPase→                                                          | SPRY+X                       | 604 | D7Y24_02420  | Gammaproteobacteria | Stenotrophomonas maltophilia | hypothetical protein D7Y24_02420 [Stenotrophomonas maltophilia].          | GCA_013463875.1 |
| MBA0313726.1 | Phage_connect_1→ Phage_H_T_join→ HK97-gp10_like→ DUF3168→ Phage_TTP_11→ Phage_TAC_13→?→ SPRY*→                                                      | SPRY                         | 249 | D7Y33_22370  | Gammaproteobacteria | Stenotrophomonas maltophilia | hypothetical protein D7Y33_22370, partial [Stenotrophomonas maltophilia]. | GCA_013464125.1 |
| MBA0313748.1 | SPRY*→                                                                                                                                              | SPRY                         | 249 | D7Y33_22510  | Gammaproteobacteria | Stenotrophomonas maltophilia | hypothetical protein D7Y33_22510, partial [Stenotrophomonas maltophilia]. | GCA_013464125.1 |
| MBA0421339.1 | Phage-tail-tape→ ConA-repeats→?→ SPRY+X*→?→?→?→?→?→?→?→?→  <-Ribonuc_L-PSP                                                                          | SPRY+X                       | 604 | D7Y22_10225  | Gammaproteobacteria | Stenotrophomonas maltophilia | hypothetical protein D7Y22_10225 [Stenotrophomonas maltophilia].          | GCA_013463895.1 |
| MBB5530851.1 | Phage_connect_1→ Phage_H_T_join→ HK97-gp10_like→ DUF3168→ Phage_TTP_11→ Phage_TAC_13→?→ SPRY+X*→?→ Phage-tail-tape→ ConA-repeats→ ConA→?→?→  <-SRAP | SPRY+X                       | 657 | GGD72_001629 | Gammaproteobacteria | Stenotrophomonas maltophilia | hypothetical protein GGD72_001629 [Stenotrophomonas maltophilia].         | GCA_014200115.1 |
| MBC17709.1   | Phage_T7_tail→ SUN+SPRY*→ Phage_tail_APC→                                                                                                           | SUN+SPRY                     | 749 | CL942_11735  | Deltaproteobacteria | Desulfovibrio sp.            | hypothetical protein CL942_11735 [Desulfovibrio sp.].                     | GCA_002711645.1 |
| MBO71803.1   | Cluster310_2clades→?→?→?→ Cluster359_2clades→ Laminin_G_3+SPRY+SPRY*→                                                                               | Laminin_G_3+SPRY+SPRY        | 973 | CL508_05750  | Actinobacteria      | Actinobacteria bacterium     | hypothetical protein CL508_05750, partial [Actinobacteria bacterium].     | GCA_002724835.1 |
| MPS35004.1   | Phage_connect_1→ Phage_H_T_join→ HK97-gp10_like→ DUF3168→ Phage_TTP_11→ Phage_TAC_13→?→ SPRY+X*→?→ Phage-tail-tape→?→?→ Cluster201_3clades→         | SPRY+X                       | 652 | E2593_06880  | Gammaproteobacteria | Stenotrophomonas sp.         | hypothetical protein E2593_06880 [Stenotrophomonas sp.].                  | GCA_009360425.1 |
| NBO27128.1   | Laminin_G_3+SPRY*→ Cluster366_2clades→                                                                                                              | Laminin_G_3+SPRY             | 547 | EBU96_10150  | Actinobacteria      | Actinobacteria bacterium     | hypothetical protein EBU96_10150 [Actinobacteria bacterium].              | GCA_009918685.1 |



| acc        | operon                                     | architecture                 | len  | gen.name    | taxend                   | species                         | define                                                                             | gca             |
|------------|--------------------------------------------|------------------------------|------|-------------|--------------------------|---------------------------------|------------------------------------------------------------------------------------|-----------------|
| NBO39260.1 | IG+IG+IG+LEVANB+SPRY*→                     | IG+IG+IG+LEVANB+SPRY         | 2486 | EBU99_11835 | unclassified<br>Bacteria | bacterium                       | hypothetical protein<br>EBU99_11835, partial<br>[bacterium].                       | GCA_009918675.1 |
| NBQ97491.1 | Laminin_G_3+SPRY*→?→ Cluster358_2clades→   | Laminin_G_3+SPRY             | 447  | EBU12_04555 | Actinobacteria           | Microbacteriaceae<br>bacterium  | hypothetical protein<br>EBU12_04555<br>[Microbacteriaceae<br>bacterium].           | GCA_009920365.1 |
| NBR26007.1 | SPRY*→                                     | SPRY                         | 290  | EBU08_19945 | Actinobacteria           | Micrococcales<br>bacterium      | hypothetical protein<br>EBU08_19945, partial<br>[Micrococcales<br>bacterium].      | GCA_009920425.1 |
| NBR26025.1 | Laminin_G_3+SPRY*→                         | Laminin_G_3+SPRY             | 450  | EBU08_20035 | Actinobacteria           | Micrococcales<br>bacterium      | hypothetical protein<br>EBU08_20035, partial<br>[Micrococcales<br>bacterium].      | GCA_009920425.1 |
| NBS68787.1 | Laminin_G_3+SPRY*→?→?→ Cluster153_2clades→ | Laminin_G_3+SPRY             | 775  | EBT31_07700 | unclassified<br>Bacteria | bacterium                       | hypothetical protein<br>EBT31_07700<br>[bacterium].                                | GCA_009921885.1 |
| NBS71002.1 | Laminin_G_3+SPRY*→                         | Laminin_G_3+SPRY             | 470  | EBT31_19160 | unclassified<br>Bacteria | bacterium                       | hypothetical protein<br>EBT31_19160, partial<br>[bacterium].                       | GCA_009921885.1 |
| NBS80068.1 | Laminin_G_3+SPRY*→                         | Laminin_G_3+SPRY             | 347  | EBS57_09835 | unclassified<br>Bacteria | bacterium                       | hypothetical protein<br>EBS57_09835<br>[bacterium].                                | GCA_009923095.1 |
| NBT48002.1 | Laminin_G_3+SPRY*→                         | Laminin_G_3+SPRY             | 734  | EBT07_09340 | Actinobacteria           | Actinobacteria<br>bacterium     | hypothetical protein<br>EBT07_09340, partial<br>[Actinobacteria<br>bacterium].     | GCA_009922275.1 |
| NBT76477.1 | Laminin_G_3+SPRY*→ Cluster74_6clades→      | Laminin_G_3+SPRY             | 576  | EBT15_11040 | Betaproteobacte-<br>ria  | Betaproteobacteria<br>bacterium | hypothetical protein<br>EBT15_11040, partial<br>[Betaproteobacteria<br>bacterium]. | GCA_009922135.1 |
| NBU64721.1 | Cluster359_2clades→?→ Laminin_G_3+SPRY*→   | Laminin_G_3+SPRY             | 351  | EBS29_09505 | Chloroflexi              | Chloroflexia bacterium          | hypothetical protein<br>EBS29_09505, partial<br>[Chloroflexia<br>bacterium].       | GCA_009923655.1 |
| NBU69993.1 | Laminin_G_3+SPRY+Laminin_G_3*→             | Laminin_G_3+SPRY+Laminin_G_3 | 937  | EBS53_00865 | Bacteroidetes            | Bacteroidetes<br>bacterium      | hypothetical protein<br>EBS53_00865<br>[Bacteroidetes<br>bacterium].               | GCA_009923185.1 |
| NBU73444.1 | Laminin_G_3+SPRY*→                         | Laminin_G_3+SPRY             | 374  | EBS53_18720 | Bacteroidetes            | Bacteroidetes<br>bacterium      | hypothetical protein<br>EBS53_18720, partial<br>[Bacteroidetes<br>bacterium].      | GCA_009923185.1 |
| NBW17394.1 | Laminin_G_3+SPRY*→ Cluster214_3clades→     | Laminin_G_3+SPRY             | 581  | EBR82_56380 | Alphaproteobacte-<br>ria | Caulobacteraceae<br>bacterium   | hypothetical protein<br>EBR82_56380, partial<br>[Caulobacteraceae<br>bacterium].   | GCA_009924585.1 |
| NBW17505.1 | Laminin_G_3+SPRY*→                         | Laminin_G_3+SPRY             | 764  | EBR82_56945 | Alphaproteobacte-<br>ria | Caulobacteraceae<br>bacterium   | hypothetical protein<br>EBR82_56945, partial<br>[Caulobacteraceae<br>bacterium].   | GCA_009924585.1 |

| acc        | operon                                                          | architecture     | len | gen.name    | taxend                | species                    | define                                                                  | gca             |
|------------|-----------------------------------------------------------------|------------------|-----|-------------|-----------------------|----------------------------|-------------------------------------------------------------------------|-----------------|
| NBW18892.1 | Laminin_G_3+SPRY*→                                              | Laminin_G_3+SPRY | 722 | EBR82_64050 | Alphaproteobacteria   | Caulobacteraceae bacterium | hypothetical protein EBR82_64050, partial [Caulobacteraceae bacterium]. | GCA_009924585.1 |
| NBW20101.1 | SPRY*→                                                          | SPRY             | 400 | EBR82_70235 | Alphaproteobacteria   | Caulobacteraceae bacterium | hypothetical protein EBR82_70235, partial [Caulobacteraceae bacterium]. | GCA_009924585.1 |
| NBW20127.1 | Laminin_G_3+SPRY*→                                              | Laminin_G_3+SPRY | 498 | EBR82_70370 | Alphaproteobacteria   | Caulobacteraceae bacterium | hypothetical protein EBR82_70370, partial [Caulobacteraceae bacterium]. | GCA_009924585.1 |
| NBW20301.1 | Laminin_G_3+SPRY*→                                              | Laminin_G_3+SPRY | 508 | EBR82_71270 | Alphaproteobacteria   | Caulobacteraceae bacterium | hypothetical protein EBR82_71270 [Caulobacteraceae bacterium].          | GCA_009924585.1 |
| NBW20891.1 | Laminin_G_3+SPRY*→                                              | Laminin_G_3+SPRY | 494 | EBR82_74310 | Alphaproteobacteria   | Caulobacteraceae bacterium | hypothetical protein EBR82_74310, partial [Caulobacteraceae bacterium]. | GCA_009924585.1 |
| NBW21054.1 | Laminin_G_3+SPRY*→                                              | Laminin_G_3+SPRY | 448 | EBR82_75135 | Alphaproteobacteria   | Caulobacteraceae bacterium | hypothetical protein EBR82_75135, partial [Caulobacteraceae bacterium]. | GCA_009924585.1 |
| NBW21679.1 | SPRY*→                                                          | SPRY             | 285 | EBR82_78355 | Alphaproteobacteria   | Caulobacteraceae bacterium | hypothetical protein EBR82_78355, partial [Caulobacteraceae bacterium]. | GCA_009924585.1 |
| NBW22642.1 | SPRY*→                                                          | SPRY             | 394 | EBR82_83325 | Alphaproteobacteria   | Caulobacteraceae bacterium | hypothetical protein EBR82_83325, partial [Caulobacteraceae bacterium]. | GCA_009924585.1 |
| NBW23811.1 | Laminin_G_3+SPRY*→                                              | Laminin_G_3+SPRY | 335 | EBR82_89280 | Alphaproteobacteria   | Caulobacteraceae bacterium | hypothetical protein EBR82_89280, partial [Caulobacteraceae bacterium]. | GCA_009924585.1 |
| NBX81523.1 | Laminin_G_3+SPRY*→                                              | Laminin_G_3+SPRY | 455 | EBQ90_00310 | unclassified Bacteria | bacterium                  | hypothetical protein EBQ90_00310, partial [bacterium].                  | GCA_009927045.1 |
| NBX88437.1 | SPRY*→                                                          | SPRY             | 317 | EBQ97_07980 | Bacteroidetes         | Bacteroidetes bacterium    | hypothetical protein EBQ97_07980, partial [Bacteroidetes bacterium].    | GCA_009926925.1 |
| NDA10477.1 | Laminin_G_3+SPRY*→ Cluster214_3clades→                          | Laminin_G_3+SPRY | 692 | EBZ07_06485 | Verrucomicrobia       | Verrucomicrobia bacterium  | hypothetical protein EBZ07_06485, partial [Verrucomicrobia bacterium].  | GCA_010025475.1 |
| NDB59170.1 | Cluster201_3clades→?→?→?→ LamG→ SPRY+TM*→?→ Cluster366_2clades→ | SPRY+TM          | 300 | EB001_12060 | unclassified Bacteria | bacterium                  | hypothetical protein EB001_12060 [bacterium].                           | GCA_010026765.1 |

| acc        | operon                                                                                                                         | architecture     | len | gen.name     | taxend                   | species                                 | define                                                                              | gca             |
|------------|--------------------------------------------------------------------------------------------------------------------------------|------------------|-----|--------------|--------------------------|-----------------------------------------|-------------------------------------------------------------------------------------|-----------------|
| NDB60922.1 | Laminin_G_3+SPRY*→                                                                                                             | Laminin_G_3+SPRY | 799 | EB001_21125  | unclassified<br>Bacteria | bacterium                               | hypothetical protein<br>EB001_21125<br>[bacterium].                                 | GCA_010026765.1 |
| NDC49301.1 | Cluster93_5clades→ Laminin_G_3+SPRY*→ Cluster214_3clades→                                                                      | Laminin_G_3+SPRY | 803 | EBZ61_09545  | Actinobacteria           | Micrococcales<br>bacterium              | hypothetical protein<br>EBZ61_09545<br>[Micrococcales<br>bacterium].                | GCA_010027415.1 |
| NDC57204.1 | SIG+SPRY*→                                                                                                                     | SIG+SPRY         | 239 | EBZ69_10460  | Alphaproteobacte-<br>ria | Alphaproteobacteria<br>bacterium        | hypothetical protein<br>EBZ69_10460, partial<br>[Alphaproteobacteria<br>bacterium]. | GCA_010027225.1 |
| NDD55753.1 | Laminin_G_3+SPRY*→                                                                                                             | Laminin_G_3+SPRY | 430 | EBZ39_18125  | unclassified<br>Bacteria | bacterium                               | hypothetical protein<br>EBZ39_18125, partial<br>[bacterium].                        | GCA_010027825.1 |
| NDD86023.1 | SPRY*→                                                                                                                         | SPRY             | 370 | EBZ38_17325  | unclassified<br>Bacteria | bacterium                               | hypothetical protein<br>EBZ38_17325, partial<br>[bacterium].                        | GCA_010027835.1 |
| NDG32417.1 | Laminin_G_3+SPRY*→                                                                                                             | Laminin_G_3+SPRY | 801 | EB118_20375  | unclassified<br>Bacteria | bacterium                               | hypothetical protein<br>EB118_20375, partial<br>[bacterium].                        | GCA_010031135.1 |
| NEU24684.1 | HTH_20→  <-PSE<-Polbetant<-Polbetant  ACET→ Cupin_2→  <-?  SIG+SPRY*→                                                          | SIG+SPRY         | 355 | G3M74_00590  | Firmicutes               | Paenibacillus<br>polymyxa               | hypothetical protein<br>G3M74_00590<br>[Paenibacillus<br>polymyxa].                 | GCA_010692785.1 |
| NEZ74825.1 | Cluster171_2clades→?→?→ Cluster216_2clades→?→?→ PSE→ SUN→ SPRY*→ SUN→ TM→ Cluster104_2clades→?→?→35exo→<br>Cluster112_2clades→ | SPRY             | 447 | EXM56_05600  | Firmicutes               | Clostridium botulinum                   | cell adhesion protein<br>[Clostridium<br>botulinum].                                | GCA_011010615.1 |
| NFM46879.1 | Cluster171_2clades→?→?→ Cluster143_2clades→?→?→ PSE→ SUN→ SPRY*→ SUN→ TM→ Cluster104_2clades→?→?→35exo→<br>Cluster112_2clades→ | SPRY             | 447 | FDB72_12170  | Firmicutes               | Clostridium botulinum                   | cell adhesion protein<br>[Clostridium<br>botulinum].                                | GCA_011017125.1 |
| NFM77397.1 | Cluster216_2clades→?→?→?→ SUN→ SPRY*→ SUN→ TM→ Cluster104_2clades→?→?→35exo→ Cluster112_2clades→                               | SPRY             | 448 | FDC04_00825  | Firmicutes               | Clostridium botulinum                   | cell adhesion protein<br>[Clostridium<br>botulinum].                                | GCA_011017715.1 |
| NIT14181.1 | Cluster165_3clades→?→?→ Cluster303_2clades→ SIG+HORMA→ Cluster138_2clades→ Cluster138_2clades→ SPRY*→ ThuA-GATase→             | SPRY             | 831 | GTN99_08085  | Bacteria                 | Candidatus<br>Dadabacteria<br>bacterium | hypothetical protein<br>GTN99_08085<br>[Candidatus<br>Dadabacteria<br>bacterium].   | GCA_011772905.1 |
| NSB16447.1 | SPRY+Big_2*→ TM→                                                                                                               | SPRY+Big_2       | 376 | BCD95_004706 | Firmicutes               | Clostridium<br>beijerinckii             | uncharacterized<br>protein YjdB<br>[Clostridium<br>beijerinckii].                   | GCA_013297045.1 |
| NUH63603.1 | HK97-gp10_like→ DUF3168→ Phage_TTP_11→ Phage_TAC_13→?→ SPRY*→                                                                  | SPRY             | 353 | HUF69_20240  | Gammaproteobac-<br>teria | Stenotrophomonas<br>maltophilia         | hypothetical protein<br>HUF69_20240, partial<br>[Stenotrophomonas<br>maltophilia].  | GCA_013345715.1 |
| OBU49329.1 | Phage_connect_1→ Phage_H_T_join→ HK97-gp10_like→ DUF3168→ Phage_TTP_11→ Phage_TAC_13→?→ SPRY+X*→                               | SPRY+X           | 657 | A9K69_19720  | Gammaproteobac-<br>teria | Stenotrophomonas<br>maltophilia         | hypothetical protein<br>A9K69_19720<br>[Stenotrophomonas<br>maltophilia].           | GCA_001676445.1 |



| acc        | operon                                                                                                                                   | architecture      | len  | gen.name     | taxend              | species                       | define                                                            | gca             |
|------------|------------------------------------------------------------------------------------------------------------------------------------------|-------------------|------|--------------|---------------------|-------------------------------|-------------------------------------------------------------------|-----------------|
| QDY50408.1 | Phage_connect_1→ Phage_H_T_join→ HK97-gp10_like→ DUF3168→ Phage_TTP_11→ Phage_TAC_13→?→ SPRY+X*→  <-?  ?→ Phage-tail-tape→ ConA-repeats→ | SPRY+X            | 655  | DUW70_18735  | Gammaproteobacteria | Stenotrophomonas maltophilia  | hypothetical protein DUW70_18735 [Stenotrophomonas maltophilia].  | GCA_007833655.1 |
| QGG50745.1 | SUN→ SUN→ SPRY+SUN*→ SUN→ Laminin_G_3→ Disaggr_repeat→?→?→ Phage_holin_1→                                                                | SPRY+SUN          | 444  | GDS87_07165  | Firmicutes          | Lysinibacillus pakistanensis  | hypothetical protein GDS87_07165 [Lysinibacillus pakistanensis].  | GCA_009649975.1 |
| QIO87716.1 | Phage_connect_1→ Phage_H_T_join→ HK97-gp10_like→?→ Phage_TTP_11→?→ SPRY*→?→?→  <-SRAP                                                    | SPRY              | 278  | G9274_001401 | Gammaproteobacteria | Stenotrophomonas rhizophila   | hypothetical protein G9274_001401 [Stenotrophomonas rhizophila].  | GCA_011604605.1 |
| RCK36140.1 | Baseplate_J→ SPRY*→                                                                                                                      | SPRY              | 575  | TH9_05700    | Alphaproteobacteria | Thalassospira xiamenensis     | hypothetical protein TH9_05700 [Thalassospira xiamenensis].       | GCA_003326725.1 |
| REJ66078.1 | JAB+NLPC→?→ Phage_tail_3→ Cluster93_5clades→ Laminin_G_3+SPRY*→ Cluster74_6clades→                                                       | Laminin_G_3+SPRY  | 1115 | DWQ28_08310  | Proteobacteria      | Proteobacteria bacterium      | hypothetical protein DWQ28_08310 [Proteobacteria bacterium].      | GCA_003388625.1 |
| REK63903.1 | Phage_tail_APC→ TM+TM→ Laminin_G_3+SPRY*→ Cluster74_6clades→?→?→ Phage_tail_APC→                                                         | Laminin_G_3+SPRY  | 797  | DWQ49_02055  | Bacteroidetes       | Bacteroidetes bacterium       | hypothetical protein DWQ49_02055 [Bacteroidetes bacterium].       | GCA_003389155.1 |
| RLC76825.1 | Cluster187_2clades→ SPRY*→ Cluster135_2clades→                                                                                           | SPRY              | 515  | DRJ03_27900  | Chloroflexi         | Chloroflexi bacterium         | hypothetical protein DRJ03_27900 [Chloroflexi bacterium].         | GCA_003648075.1 |
| RPI56186.1 | Cluster138_2clades→?→?→ SPRY*→ Cluster135_2clades→                                                                                       | SPRY              | 495  | EHM49_00895  | Deltaproteobacteria | Deltaproteobacteria bacterium | hypothetical protein EHM49_00895 [Deltaproteobacteria bacterium]. | GCA_003819885.1 |
| RRY03816.1 | SPRY*→?→ Phage_lysozyme→                                                                                                                 | SPRY              | 771  | EGJ58_22195  | Alphaproteobacteria | Ochrobactrum anthropi         | hypothetical protein EGJ58_22195 [Ochrobactrum anthropi].         | GCA_003937425.1 |
| RYG67597.1 | fn3+SPRY*→                                                                                                                               | fn3+SPRY          | 1230 | EON64_07085  | Archaea             | archaeon                      | hypothetical protein EON64_07085 [archaeon].                      | GCA_004145555.1 |
| RYH32433.1 | SF2-helicase+SPRY*→                                                                                                                      | SF2-helicase+SPRY | 535  | EON65_00615  | Archaea             | archaeon                      | DEAD/DEAH box helicase [archaeon].                                | GCA_004146225.1 |
| RYY37588.1 | SPRY*→                                                                                                                                   | SPRY              | 952  | EON62_01040  | Archaea             | archaeon                      | hypothetical protein EON62_01040, partial [archaeon].             | GCA_004173375.1 |
| RYY72402.1 | SPRY*→                                                                                                                                   | SPRY              | 164  | EON63_20910  | Archaea             | archaeon                      | hypothetical protein EON63_20910 [archaeon].                      | GCA_004173275.1 |
| TDL67967.1 | SUN→ SUN→ SPRY+SUN*→ Laminin_G_3→ Disaggr_repeat→                                                                                        | SPRY+SUN          | 425  | E2R58_01745  | Firmicutes          | Paenibacillus amylolyticus    | hypothetical protein E2R58_01745 [Paenibacillus amylolyticus].    | GCA_004358835.1 |

| acc        | operon                                                                                                                                        | architecture | len | gen.name        | taxend              | species                                       | define                                                                            | gca             |
|------------|-----------------------------------------------------------------------------------------------------------------------------------------------|--------------|-----|-----------------|---------------------|-----------------------------------------------|-----------------------------------------------------------------------------------|-----------------|
| TSC88001.1 | Laminin_G_3+Laminin_G_3+Laminin_G_3+Laminin_G_3→?→?→?→?→ SPRY+SUN*→<br>Laminin_G_3+Laminin_G_3+Laminin_G_3+Laminin_G_3→                       | SPRY+SUN     | 607 | G01um10145_950  | Bacteria            | Microgenomates group bacterium<br>Gr01-1014_5 | hypothetical protein G01um10145_950 [Microgenomates group bacterium Gr01-1014_5]. | GCA_007376395.1 |
| VUI62768.1 | Phage_connect_1→ Phage_H_T_join→ HK97-gp10_like→ DUF3168→ Phage_TTP_11→ Phage_TAC_13→?→ SPRY+X*→?→?→ Phage-tail-tape→                         | SPRY+X       | 655 | GCPJBBEJ_01199  | Gammaproteobacteria | Stenotrophomonas maltophilia                  | hypothetical protein GCPJBBEJ_01199 [Stenotrophomonas maltophilia].               | GCA_902156415.1 |
| VUJ81145.1 | Phage-tail-tape→ ConA-repeats→?→ SPRY+X*→?→?→?→?→ SIG+TM+TM+TM+TM+TM+TM+TM+TM+TM→ ABC-ATPase→                                                 | SPRY+X       | 604 | IEE-HEPME_02021 | Gammaproteobacteria | Stenotrophomonas maltophilia                  | hypothetical protein IEEHEPME_02021 [Stenotrophomonas maltophilia].               | GCA_902156595.1 |
| VUL57431.1 | Terminase_LS→ SPRY*→?→  <-?  SIG+TM+TM+TM+TM+ABC-ATPase→                                                                                      | SPRY         | 217 | LBG-BLGGB_01284 | Gammaproteobacteria | Stenotrophomonas maltophilia                  | hypothetical protein LGBLGGB_01284 [Stenotrophomonas maltophilia].                | GCA_902156925.1 |
| VUL62146.1 | Phage_connect_1→ Phage_H_T_join→ HK97-gp10_like→ DUF3168→ Phage_TTP_11→ Phage_TAC_13→?→ SPRY+X*→?→?→ Phage-tail-tape→                         | SPRY+X       | 657 | CCAN-PDJD_00380 | Gammaproteobacteria | Stenotrophomonas maltophilia                  | hypothetical protein CCANPDJD_00380 [Stenotrophomonas maltophilia].               | GCA_902157015.1 |
| VUL75017.1 | Phage_connect_1→ Phage_H_T_join→ HK97-gp10_like→?→ Phage_TTP_11→ Phage_TAC_13→?→ SPRY+X*→?→?→ Phage-tail-tape→                                | SPRY+X       | 655 | GEILP-BKL_02464 | Gammaproteobacteria | Stenotrophomonas maltophilia                  | hypothetical protein GEILPBKL_02464 [Stenotrophomonas maltophilia].               | GCA_902156945.1 |
| VUM07479.1 | Phage_connect_1→ Phage_H_T_join→ HK97-gp10_like→ DUF3168→ Phage_TTP_11→ Phage_TAC_13→?→ SPRY+X*→?→?→ Phage-tail-tape→ ConA-repeats→?→?→ SRAP→ | SPRY+X       | 657 | IKOGN-NCB_02002 | Gammaproteobacteria | Stenotrophomonas maltophilia                  | hypothetical protein IKOGNNCB_02002 [Stenotrophomonas maltophilia].               | GCA_902157055.1 |
| VUM45402.1 | ConA-repeats→?→ SPRY+X*→                                                                                                                      | SPRY+X       | 604 | FMOPOFGM_00942  | Gammaproteobacteria | Stenotrophomonas maltophilia                  | hypothetical protein FMOPOFGM_00942 [Stenotrophomonas maltophilia].               | GCA_902157105.1 |
| VUM59055.1 | Phage_connect_1→ Phage_H_T_join→ HK97-gp10_like→ DUF3168→ Phage_TTP_11→ Phage_TAC_13→?→ SPRY+X*→?→?→ Phage-tail-tape→ ConA-repeats→           | SPRY+X       | 657 | FMOPOFGM_03099  | Gammaproteobacteria | Stenotrophomonas maltophilia                  | hypothetical protein FMOPOFGM_03099 [Stenotrophomonas maltophilia].               | GCA_902157105.1 |
| VUN16325.1 | Phage_connect_1→ Phage_H_T_join→ HK97-gp10_like→ DUF3168→ Phage_TTP_11→ Phage_TAC_13→?→ SPRY+X*→  <-?  ?→?→ Phage-tail-tape→ ConA-repeats→    | SPRY+X       | 657 | CP-DIOOCO_00061 | Gammaproteobacteria | Stenotrophomonas maltophilia                  | hypothetical protein CPDIOOCO_00061 [Stenotrophomonas maltophilia].               | GCA_902157315.1 |
| VUN62462.1 | Phage_connect_1→ Phage_H_T_join→ HK97-gp10_like→ DUF3168→ Phage_TTP_11→ Phage_TAC_13→?→ SPRY+X*→?→?→ Phage-tail-tape→ ConA-repeats→ ConA→     | SPRY+X       | 655 | FHOP-GADK_00135 | Gammaproteobacteria | Stenotrophomonas maltophilia                  | hypothetical protein FHOPGADK_00135 [Stenotrophomonas maltophilia].               | GCA_902157435.1 |
| VUN67178.1 | Phage_H_T_join→ HK97-gp10_like→ DUF3168→ Phage_TTP_11→ Phage_TAC_13→?→?→ SPRY+X*→  <-?  ?→ Phage-tail-tape→                                   | SPRY+X       | 601 | JLECIBJP_00444  | Gammaproteobacteria | Stenotrophomonas maltophilia                  | hypothetical protein JLECIBJP_00444 [Stenotrophomonas maltophilia].               | GCA_902157425.1 |

| acc        | operon                                                                                                                                          | architecture | len | gen.name        | taxend              | species                      | define                                                               | gca             |
|------------|-------------------------------------------------------------------------------------------------------------------------------------------------|--------------|-----|-----------------|---------------------|------------------------------|----------------------------------------------------------------------|-----------------|
| VUN71522.1 | Phage_connect_1→ Phage_H_T_join→ HK97-gp10_like→ DUF3168→ Phage_TTP_11→ Phage_TAC_13→?→ SPRY+X*→?→ Phage-tail-tape→ ConA-repeats→?→?→ SRAP→     | SPRY+X       | 655 | IJ-MOMJOI_00888 | Gammaproteobacteria | Stenotrophomonas maltophilia | hypothetical protein IJMOMJOI_00888 [Stenotrophomonas maltophilia].  | GCA_902157415.1 |
| VUO23348.1 | Phage_connect_1→ Phage_H_T_join→ HK97-gp10_like→ DUF3168→ Phage_TTP_11→ Phage_TAC_13→?→ SPRY+X*→?→?→ Phage-tail-tape→?→?→?→  <-SRAP             | SPRY+X       | 656 | JBID-JGIM_02130 | Gammaproteobacteria | Stenotrophomonas maltophilia | hypothetical protein JBIDJGIM_02130 [Stenotrophomonas maltophilia].  | GCA_902157545.1 |
| VUO59656.1 | Phage_connect_1→ Phage_H_T_join→ HK97-gp10_like→ DUF3168→ Phage_TTP_11→ Phage_TAC_13→?→ SPRY+X*→?→?→ Phage-tail-tape→ ConA-repeats→?→?→  <-SRAP | SPRY+X       | 655 | CMGNCPHI_00882  | Gammaproteobacteria | Stenotrophomonas maltophilia | hypothetical protein CMGNCPHI_00882 [Stenotrophomonas maltophilia].  | GCA_902157585.1 |
| VUP11864.1 | Phage_connect_1→ Phage_H_T_join→ HK97-gp10_like→ DUF3168→ Phage_TTP_11→ Phage_TAC_13→?→ SPRY+X*→?→?→ Phage-tail-tape→                           | SPRY+X       | 658 | ECE-FJIBE_02107 | Gammaproteobacteria | Stenotrophomonas maltophilia | hypothetical protein ECEFJIBE_02107 [Stenotrophomonas maltophilia].  | GCA_902157845.1 |
| VUP33787.1 | Phage_connect_1→ Phage_H_T_join→ HK97-gp10_like→ DUF3168→ Phage_TTP_11→ Phage_TAC_13→?→ SPRY+X*→?→?→ Phage-tail-tape→                           | SPRY+X       | 657 | ECE-FJIBE_03296 | Gammaproteobacteria | Stenotrophomonas maltophilia | hypothetical protein ECEFJIBE_03296 [Stenotrophomonas maltophilia].  | GCA_902157845.1 |
| VUP45028.1 | Phage_connect_1→ Phage_H_T_join→ HK97-gp10_like→ DUF3168→ Phage_TTP_11→ Phage_TAC_13→?→ SPRY+X*→?→?→ Phage-tail-tape→ ConA-repeats→?→?→ SRAP→   | SPRY+X       | 657 | KEFP-IEB_04064  | Gammaproteobacteria | Stenotrophomonas maltophilia | hypothetical protein KEFP-IEB_04064 [Stenotrophomonas maltophilia].  | GCA_902157865.1 |
| VUP91253.1 | Phage_connect_1→ Phage_H_T_join→ HK97-gp10_like→ DUF3168→ Phage_TTP_11→ Phage_TAC_13→?→ SPRY+X*→  <-?  ?→?→ Phage-tail-tape→ ConA-repeats→      | SPRY+X       | 657 | BLDAJIEI_03531  | Gammaproteobacteria | Stenotrophomonas maltophilia | hypothetical protein BLDAJIEI_03531 [Stenotrophomonas maltophilia].  | GCA_902157935.1 |
| VUP99062.1 | Phage_connect_1→ Phage_H_T_join→ HK97-gp10_like→ DUF3168→ Phage_TTP_11→ Phage_TAC_13→?→ SPRY+X*→?→?→ Phage-tail-tape→                           | SPRY+X       | 655 | BIEDFHEJ_01659  | Gammaproteobacteria | Stenotrophomonas maltophilia | hypothetical protein BIEDFHEJ_01659 [Stenotrophomonas maltophilia].  | GCA_902157995.1 |
| VUQ06316.1 | Phage_connect_1→ Phage_H_T_join→ HK97-gp10_like→ DUF3168→ Phage_TTP_11→ Phage_TAC_13→?→ SPRY+X*→?→?→ Phage-tail-tape→                           | SPRY+X       | 655 | JPICFAGD_01619  | Gammaproteobacteria | Stenotrophomonas maltophilia | hypothetical protein JPICFAGD_01619 [Stenotrophomonas maltophilia].  | GCA_902158065.1 |
| VUQ08603.1 | Phage_connect_1→ Phage_H_T_join→ HK97-gp10_like→ DUF3168→ Phage_TTP_11→ Phage_TAC_13→?→ SPRY+X*→  <-?  ?→ Phage-tail-tape→ ConA-repeats→        | SPRY+X       | 655 | MKCK-LKB_01148  | Gammaproteobacteria | Stenotrophomonas maltophilia | hypothetical protein MKCKLKB_01148 [Stenotrophomonas maltophilia].   | GCA_902158105.1 |
| VUQ16634.1 | Phage_connect_1→ Phage_H_T_join→ HK97-gp10_like→ DUF3168→ Phage_TTP_11→ Phage_TAC_13→?→ SPRY+X*→  <-?  ?→ Phage-tail-tape→                      | SPRY+X       | 657 | DOOMH-BAD_02908 | Gammaproteobacteria | Stenotrophomonas maltophilia | hypothetical protein DOOMH-BAD_02908 [Stenotrophomonas maltophilia]. | GCA_902158025.1 |
| VUR39033.1 | Phage_connect_1→ Phage_H_T_join→ HK97-gp10_like→ DUF3168→ Phage_TTP_11→ Phage_TAC_13→?→ SPRY+X*→?→?→ Phage-tail-tape→ ConA-repeats→?→?→ SRAP→   | SPRY+X       | 657 | JHKEGKPK_04271  | Gammaproteobacteria | Stenotrophomonas maltophilia | hypothetical protein JHKEGKPK_04271 [Stenotrophomonas maltophilia].  | GCA_902158305.1 |
| VUR45784.1 | Phage_connect_1→ Phage_H_T_join→ HK97-gp10_like→ DUF3168→ Phage_TTP_11→ Phage_TAC_13→?→ SPRY+X*→?→?→ Phage-tail-tape→ ConA-repeats→?→?→  <-SRAP | SPRY+X       | 657 | PGEAM-FKH_03207 | Gammaproteobacteria | Stenotrophomonas maltophilia | hypothetical protein PGEAMFKH_03207 [Stenotrophomonas maltophilia].  | GCA_902158325.1 |

| acc            | operon                                                                                                                                              | architecture         | len  | gen.name        | taxend              | species                          | define                                                                                     | gca             |
|----------------|-----------------------------------------------------------------------------------------------------------------------------------------------------|----------------------|------|-----------------|---------------------|----------------------------------|--------------------------------------------------------------------------------------------|-----------------|
| VUR81206.1     | Phage_connect_1→ Phage_H_T_join→ HK97-gp10_like→ DUF3168→ Phage_TTP_11→ Phage_TAC_13→?→ SPRY+X*→?→?→ Phage-tail-tape→ ConA-repeats→ ConA→?→  <-SRAP | SPRY+X               | 655  | GMKOK-IBD_01185 | Gammaproteobacteria | Stenotrophomonas maltophilia     | hypothetical protein GMKOKIBD_01185 [Stenotrophomonas maltophilia].                        | GCA_902158475.1 |
| WP_007428531.1 | <-ABhydrolase<-?  SIG+SPRY→ SIG+SPRY→ SUN→  <-?<-Glycos_transf_2<-?  SUN→                                                                           | SIG+SPRY             | 322  | WG8_RS02665     | Firmicutes          | Paenibacillus sp. Aloe-11        | hypothetical protein [Paenibacillus sp. Aloe-11].                                          | GCF_000245715.1 |
| WP_010076376.1 | <-SIG+IG<-?  SPRY+Big_2→ SPRY+Big_2→  <-ACET                                                                                                        | SPRY+Big_2           | 292  | CLO-CEL_RS05090 | Firmicutes          | Clostridium cellulovorans        | Ig-like domain-containing protein [Clostridium cellulovorans].                             | GCF_000145275.1 |
| WP_013308530.1 | HTH_20→  <-ABhydrolase<-Polbetant  ACET→ Cupin_2→  <-DUF2935  SIG+SPRY*→  <-?  ?→  <-Glycos_transf_2                                                | SIG+SPRY             | 346  | PPE_RS02405     | Firmicutes          | Paenibacillus polymyxa           | hypothetical protein [Paenibacillus polymyxa].                                             | GCF_000146875.3 |
| WP_013513300.1 | Phage_T7_tail→ SPRY*→ Phage_tail_APC→                                                                                                               | SPRY                 | 528  | DAES_RS01675    | Deltaproteobacteria | Pseudodesulfovibrio aespoecensis | SPla/Ryanodine receptor SPRY domain-containing protein [Pseudodesulfovibrio aespoecensis]. | GCF_000176915.2 |
| WP_019226907.1 | SIG+SPRY*→                                                                                                                                          | SIG+SPRY             | 378  | BN359_RS15990   | Firmicutes          | Dehalobacter                     | MULTISPECIES: hypothetical protein [Dehalobacter].                                         | GCF_000309295.1 |
| WP_019639008.1 | SPRY+SUN→ SUN+SPRY→ Laminin_G_3→ Disaggr_repeat→ Phage_holin_4_1→                                                                                   | SPRY+SUN             | 411  | G358_RS0119880  | Firmicutes          | Paenibacillus fonticola          | hypothetical protein [Paenibacillus fonticola].                                            | GCF_000381905.1 |
| WP_019639009.1 | -                                                                                                                                                   | -                    | 413  | G358_RS0119885  | Firmicutes          | Paenibacillus fonticola          | discoidin domain-containing protein [Paenibacillus fonticola].                             | GCF_000381905.1 |
| WP_019687775.1 | SUN→ SPRY+Glyco_hydro_106*→ Laminin_G_3→ Disaggr_repeat→ Phage_holin_4_1→                                                                           | SPRY+Glyco_hydro_106 | 403  | H7A89_RS14065   | Firmicutes          | Paenibacillus polymyxa           | hypothetical protein [Paenibacillus polymyxa].                                             | GCF_903797665.1 |
| WP_020591223.1 | Phage_T7_tail→ SPRY*→                                                                                                                               | SPRY                 | 1351 | B152_RS0104640  | Alphaproteobacteria | Kiloniella laminariae            | hypothetical protein [Kiloniella laminariae].                                              | GCF_000374005.1 |
| WP_021132610.1 | SPRY*→ Phage_tail_APC→                                                                                                                              | SPRY                 | 746  | K678_RS11425    | Alphaproteobacteria | Phaeospirillum fulvum            | hypothetical protein [Phaeospirillum fulvum].                                              | GCF_000442515.1 |
| WP_021203812.1 | Phage_connect_1→ Phage_H_T_join→ HK97-gp10_like→ DUF3168→ Phage_TTP_11→ Phage_TAC_13→?→ SPRY+X*→?→?→ Phage-tail-tape→ ConA-repeats→?→?→  <-SRAP     | SPRY+X               | 657  | L681_RS129520   | Gammaproteobacteria | Stenotrophomonas maltophilia     | hypothetical protein [Stenotrophomonas maltophilia].                                       | GCF_000455685.1 |
| WP_023986763.1 | <-Trypsin<-ABhydrolase<-Polbetant  ACET→ Cupin_2→ ABhydrolase→  <-DUF2935  SIG+SPRY*→  <-PSE  ?→ SIG+SPRY→ PSE→  <-Glycos_transf_2                  | SIG+SPRY             | 331  | X809_RS02170    | Firmicutes          | Paenibacillus polymyxa           | hypothetical protein [Paenibacillus polymyxa].                                             | GCF_000507205.3 |
| WP_024956478.1 | Phage_connect_1→ Phage_H_T_join→ HK97-gp10_like→ DUF3168→ Phage_TTP_11→ Phage_TAC_13→ SPRY+X*→?→?→ Phage-tail-tape→                                 | SPRY+X               | 657  | BMR86_RS03335   | Gammaproteobacteria | Stenotrophomonas                 | MULTISPECIES: hypothetical protein [Stenotrophomonas].                                     | GCF_001591205.1 |
| WP_025116403.1 | SPRY→?→ SPRY+SUN→                                                                                                                                   | SPRY                 | 559  | U863_RS0116605  | Firmicutes          | Lysinibacillus fusiformis        | discoidin domain-containing protein [Lysinibacillus fusiformis].                           | GCF_000633275.1 |



| acc            | operon                                                                                                             | architecture | len | gen.name       | taxend     | species                    | define                                                           | gca             |
|----------------|--------------------------------------------------------------------------------------------------------------------|--------------|-----|----------------|------------|----------------------------|------------------------------------------------------------------|-----------------|
| WP_025116405.1 | -                                                                                                                  | -            | 396 | U863_RS0116615 | Firmicutes | Lysinibacillus fusiformis  | hypothetical protein [Lysinibacillus fusiformis].                | GCF_000633275.1 |
| WP_025219035.1 | SUN→SPRY*→SUN→SPRY→Laminin_G_3→Disaggr_repeat→?→?→Phage_holin_1→                                                   | SPRY         | 281 | T479_RS06935   | Firmicutes | Lysinibacillus varians     | hypothetical protein [Lysinibacillus varians].                   | GCF_000600105.1 |
| WP_025363879.1 | HTH_20→  <-Trypsin<-ABhydrolase  ACET→  <-DUF2935<-?  SIG+SPRY*→                                                   | SIG+SPRY     | 332 | LK13_RS15595   | Firmicutes | Paenibacillus polymyxa     | hypothetical protein [Paenibacillus polymyxa].                   | GCF_000597985.1 |
| WP_025676232.1 | HTH_20→  <-Trypsin<-ABhydrolase  ACET→  <-DUF2935<-?  SIG+SPRY*→                                                   | SIG+SPRY     | 327 | L695_RS0111830 | Firmicutes | Paenibacillus polymyxa     | hypothetical protein [Paenibacillus polymyxa].                   | GCF_000520795.1 |
| WP_025682581.1 | HTH_20→  <-?  ?→  <-DUF2935<-?  SIG+SPRY*→  <-PSE  SUN→  <-?  ?→  <-?<-?<-Phage_holin_4_1                          | SIG+SPRY     | 332 | L696_RS0104535 | Firmicutes | Paenibacillus maysiensis   | hypothetical protein [Paenibacillus maysiensis].                 | GCF_000520815.1 |
| WP_025716755.1 | HTH_20→  <-ABhydrolase<-?  SIG+SPRY*→                                                                              | SIG+SPRY     | 314 | L693_RS0107595 | Firmicutes | Paenibacillus sp. 1-18     | hypothetical protein [Paenibacillus sp. 1-18].                   | GCF_000520755.1 |
| WP_025721904.1 | HTH_20→  <-Trypsin<-ABhydrolase<-Polbetant  ACET→Cupin_2→  <-DUF2935  SIG+SPRY*→                                   | SIG+SPRY     | 218 | L694_RS0112470 | Firmicutes | Paenibacillus polymyxa     | hypothetical protein, partial [Paenibacillus polymyxa].          | GCF_000520775.1 |
| WP_028541175.1 | <-ABhydrolase<-Polbetant  ACET→Cupin_2→ABhydrolase→  <-DUF2935<-?  SIG+SPRY*→  <-?  ?→SIG+SPRY→  <-Glycos_transf_2 | SIG+SPRY     | 320 | BM358_RS15270  | Firmicutes | unclassified Paenibacillus | MULTISPECIES: hypothetical protein [unclassified Paenibacillus]. | GCF_900116035.1 |
| WP_028562231.1 | SPRY+SUN*→SUN→Laminin_G_3→Disaggr_repeat→                                                                          | SPRY+SUN     | 414 | H583_RS35510   | Firmicutes | Paenibacillus pinihumi     | hypothetical protein [Paenibacillus pinihumi].                   | GCF_000422505.1 |
| WP_029516016.1 | <-ABhydrolase<-Polbetant  ACET→Cupin_2→ABhydrolase→  <-DUF2935  SUN→SIG+SPRY*→?→?→  <-Glycos_transf_2              | SIG+SPRY     | 322 | B439_RS0108145 | Firmicutes | Paenibacillus polymyxa     | hypothetical protein [Paenibacillus polymyxa].                   | GCF_000463565.1 |
| WP_029518099.1 | SUN→SUN*→Laminin_G_3→Disaggr_repeat→                                                                               | SUN          | 403 | B439_RS0121250 | Firmicutes | Paenibacillus polymyxa     | hypothetical protein [Paenibacillus polymyxa].                   | GCF_000463565.1 |
| WP_031462749.1 | HTH_20→  <-Trypsin<-ABhydrolase  ACET→  <-DUF2935<-?  SIG+SPRY*→                                                   | SIG+SPRY     | 308 | FC01_RS0115670 | Firmicutes | Paenibacillus polymyxa     | hypothetical protein [Paenibacillus polymyxa].                   | GCF_000735775.1 |
| WP_033066158.1 | Cluster143_2clades→?→?→?→SUN→SPRY*→PSE→PSE→SUN→TM→Cluster104_2clades→?→?→35exo→Cluster112_2clades→                 | SPRY         | 447 | N496_RS05195   | Firmicutes | Clostridium botulinum      | cell adhesion protein [Clostridium botulinum].                   | GCF_000710995.1 |
| WP_036124491.1 | SUN→SUN→?→SUN→SUN→SPRY*→SUN→Laminin_G_3→Disaggr_repeat→?→?→Phage_holin_1→                                          | SPRY         | 257 | HR49_RS16910   | Firmicutes | Lysinibacillus             | MULTISPECIES: hypothetical protein [Lysinibacillus].             | GCF_000724775.3 |
| WP_036147628.1 | SUN→SPRY+SUN→SPRY+SUN→SUN→SUN→SUN→Laminin_G_3→Disaggr_repeat→                                                      | SPRY+SUN     | 414 | KQ41_RS11015   | Firmicutes | Lysinibacillus fusiformis  | discoidin domain-containing protein [Lysinibacillus fusiformis]. | GCF_000755455.1 |
| WP_036147629.1 | -                                                                                                                  | -            | 433 | KQ41_RS11020   | Firmicutes | Lysinibacillus fusiformis  | discoidin domain-containing protein [Lysinibacillus fusiformis]. | GCF_000755455.1 |

| acc            | operon                                                                                                                                    | architecture     | len  | gen.name      | taxend              | species                      | define                                                              | gca             |
|----------------|-------------------------------------------------------------------------------------------------------------------------------------------|------------------|------|---------------|---------------------|------------------------------|---------------------------------------------------------------------|-----------------|
| WP_036669882.1 | SUN→SPRY+SUN→SPRY+SUN→Laminin_G_3→Disaggr_repeat→                                                                                         | SPRY+SUN         | 395  | C161_RS09450  | Firmicutes          | Paenibacillus sp. FSL R5-192 | hypothetical protein [Paenibacillus sp. FSL R5-192].                | GCF_000517845.1 |
| WP_040102262.1 | HTH_20→  <-Trypsin<-ABhydrolase  ACET→  <-DUF2935<-?  SIG+SPRY*→                                                                          | SIG+SPRY         | 319  | RE92_RS09150  | Firmicutes          | Paenibacillus polymyxa       | hypothetical protein [Paenibacillus polymyxa].                      | GCF_000819665.1 |
| WP_044646514.1 | <-DUF2935  ?→  <-?  SIG+SPRY*→                                                                                                            | SIG+SPRY         | 326  | QD47_RS12890  | Firmicutes          | Paenibacillus terrae         | hypothetical protein [Paenibacillus terrae].                        | GCF_000943545.1 |
| WP_044648488.1 | SIG+SPRY*→  <-?<-?<-?<-?<-?<-Phage_holin_4_1                                                                                              | SIG+SPRY         | 327  | QD47_RS23995  | Firmicutes          | Paenibacillus terrae         | hypothetical protein [Paenibacillus terrae].                        | GCF_000943545.1 |
| WP_044787083.1 | HTH_20→  <-Trypsin<-ABhydrolase  ACET→  <-DUF2935<-?  SIG+SPRY*→                                                                          | SIG+SPRY         | 357  | DS866_RS12660 | Firmicutes          | Paenibacillus polymyxa       | hypothetical protein [Paenibacillus polymyxa].                      | GCF_000943535.1 |
| WP_046501577.1 | Phage_T7_tail→SPRY*→                                                                                                                      | SPRY             | 1158 | WH95_RS00475  | Alphaproteobacteria | Kiloniella litopenaei        | hypothetical protein [Kiloniella litopenaei].                       | GCF_000982415.1 |
| WP_048035679.1 | SUN→SUN→SPRY*→?→?→?→  <-?<-?<-?<-ABC-ATPase                                                                                               | SPRY             | 890  | AB432_RS03735 | Firmicutes          | Brevibacillus brevis         | hypothetical protein [Brevibacillus brevis].                        | GCF_001039275.2 |
| WP_049431026.1 | Phage_connect_1→Phage_H_T_join→HK97-gp10_like→DUF3168→Phage_TTP_11→Phage_TAC_13→SPRY+X*→  <-?  ?→?→Phage-tail-tape→ConA-repeats→          | SPRY+X           | 657  | G5A48_RS10580 | Gammaproteobacteria | Stenotrophomonas maltophilia | hypothetical protein [Stenotrophomonas maltophilia].                | GCF_001069295.1 |
| WP_049432438.1 | Phage_connect_1→Phage_H_T_join→HK97-gp10_like→DUF3168→Phage_TTP_11→Phage_TAC_13→?→SPRY+X*→?→?→Phage-tail-tape→ConA-repeats→               | SPRY+X           | 655  | A7X76_RS05335 | Gammaproteobacteria | Stenotrophomonas maltophilia | hypothetical protein [Stenotrophomonas maltophilia].                | GCF_001070785.1 |
| WP_049448603.1 | Phage_connect_1→Phage_H_T_join→HK97-gp10_like→DUF3168→Phage_TTP_11→Phage_TAC_13→?→SPRY+X*→?→Phage-tail-tape→ConA-repeats→                 | SPRY+X           | 657  | ADH94_RS22020 | Gammaproteobacteria | Stenotrophomonas maltophilia | hypothetical protein [Stenotrophomonas maltophilia].                | GCF_001071475.1 |
| WP_049450667.1 | Phage_connect_1→Phage_H_T_join→HK97-gp10_like→DUF3168→Phage_TTP_11→Phage_TAC_13→?→SPRY+X*→?→Phage-tail-tape→?→?→?→  <-SRAP                | SPRY+X           | 656  | EGS96_RS20790 | Gammaproteobacteria | Stenotrophomonas maltophilia | hypothetical protein [Stenotrophomonas maltophilia].                | GCF_001071195.1 |
| WP_049454514.1 | Phage_connect_1→Phage_H_T_join→HK97-gp10_like→DUF3168→Phage_TTP_11→Phage_TAC_13→?→SPRY+X*→?→?→Phage-tail-tape→ConA-repeats→?→?→?→  <-SRAP | SPRY+X           | 658  | ADF89_RS18240 | Gammaproteobacteria | Stenotrophomonas maltophilia | hypothetical protein [Stenotrophomonas maltophilia].                | GCF_001069005.1 |
| WP_049459324.1 | Phage_connect_1→Phage_H_T_join→HK97-gp10_like→DUF3168→Phage_TTP_11→Phage_TAC_13→?→SPRY+X*→?→?→Phage-tail-tape→ConA-repeats→               | SPRY+X           | 657  | ADM04_RS16360 | Gammaproteobacteria | Stenotrophomonas maltophilia | hypothetical protein [Stenotrophomonas maltophilia].                | GCF_001074705.1 |
| WP_049736558.1 | SUN→Laminin_G_3+SPRY*→                                                                                                                    | Laminin_G_3+SPRY | 822  | BRE01_RS08970 | Firmicutes          | Brevibacillus reuszeri       | hypothetical protein [Brevibacillus reuszeri].                      | GCF_006540225.1 |
| WP_051447145.1 | SUN→SPRY+SUN→SUN→SPRY+SUN→Laminin_G_3→Disaggr_repeat→                                                                                     | SPRY+SUN         | 421  | C170_RS30045  | Firmicutes          | Paenibacillus sp. FSL H7-689 | discoidin domain-containing protein [Paenibacillus sp. FSL H7-689]. | GCF_000517905.1 |
| WP_051447146.1 | -                                                                                                                                         | -                | 399  | C170_RS30050  | Firmicutes          | Paenibacillus sp. FSL H7-689 | discoidin domain-containing protein [Paenibacillus sp. FSL H7-689]. | GCF_000517905.1 |
| WP_051449672.1 | -                                                                                                                                         | -                | 402  | C161_RS31475  | Firmicutes          | Paenibacillus sp. FSL R5-192 | hypothetical protein [Paenibacillus sp. FSL R5-192].                | GCF_000517845.1 |
| WP_051626263.1 | <-REC+OmpR-HTH<-?<-OBfold<-?<-?  ?→  <-?  SIG+SPRY*→                                                                                      | SIG+SPRY         | 653  | EP01_RS18270  | Oligoflexia         | Bdellovibrio bacteriovorus   | hypothetical protein [Bdellovibrio bacteriovorus].                  | GCF_000691605.1 |

| acc            | operon                                                                                                                                              | architecture | len | gen.name         | taxend              | species                         | define                                                                      | gca             |
|----------------|-----------------------------------------------------------------------------------------------------------------------------------------------------|--------------|-----|------------------|---------------------|---------------------------------|-----------------------------------------------------------------------------|-----------------|
| WP_052310845.1 | -                                                                                                                                                   | -            | 229 | WG8_RS02660      | Firmicutes          | Paenibacillus sp. Aloe-11       | hypothetical protein, partial [Paenibacillus sp. Aloe-11].                  | GCF_000245715.1 |
| WP_053324515.1 | <-ABhydrolase<-Polbetant  ACET→ Cupin_2→ ABhydrolase→  <-DUF2935<-?  SIG+SPRY→  <-PSE  ?→ SIG+SPRY→  <-Glycos_transf_2                              | SIG+SPRY     | 373 | BK119_RS14050    | Firmicutes          | Paenibacillus                   | MULTISPECIES: hypothetical protein [Paenibacillus].                         | GCF_001922145.1 |
| WP_053324516.1 | <-ABhydrolase<-Polbetant  ACET→ Cupin_2→ ABhydrolase→  <-DUF2935<-?  SIG+SPRY*→?→ SIG+SPRY→ PSE→  <-Glycos_transf_2                                 | SIG+SPRY     | 328 | ABE82_RS02500    | Firmicutes          | Paenibacillus peoriae           | hypothetical protein [Paenibacillus peoriae].                               | GCF_001272655.2 |
| WP_053497216.1 | Phage_connect_1→ Phage_H_T_join→ HK97-gp10_like→ DUF3168→ Phage_TTP_11→ Phage_TAC_13→?→ SPRY+X*→?→?→ Phage-tail-tape→ ConA-repeats→ ConA→?→  <-SRAP | SPRY+X       | 655 | ABW42_RS03390    | Gammaproteobacteria | Stenotrophomonas maltophilia    | hypothetical protein [Stenotrophomonas maltophilia].                        | GCF_001276345.1 |
| WP_053519524.1 | Phage_connect_1→ Phage_H_T_join→ HK97-gp10_like→ DUF3168→ Phage_TTP_11→ Phage_TAC_13→?→ SPRY+X*→?→ Phage-tail-tape→ ConA-repeats→                   | SPRY+X       | 655 | ABW43_RS14405    | Gammaproteobacteria | Stenotrophomonas maltophilia    | hypothetical protein [Stenotrophomonas maltophilia].                        | GCF_001276355.1 |
| WP_053595626.1 | SUN→ SPRY+SUN*→ SUN→ SUN→ Laminin_G_3→ Disaggr_repeat→                                                                                              | SPRY+SUN     | 413 | AN161_RS17530    | Firmicutes          | Lysinibacillus sp. FJAT-14222   | discoidin domain-containing protein [Lysinibacillus sp. FJAT-14222].        | GCF_001278875.1 |
| WP_054136806.1 | <-SIG+IG<-?  ?→?→?→  <-?<-?  SUN+SPRY*→                                                                                                             | SUN+SPRY     | 466 | IP80_RS13885     | Betaproteobacteria  | unclassified Betaproteobacteria | MULTISPECIES: tautomerase family protein [unclassified Betaproteobacteria]. | GCF_001295865.1 |
| WP_054704414.1 | SPRY+TM*→ SUN→ SUN→ Laminin_G_3→ Disaggr_repeat→                                                                                                    | SPRY+TM      | 211 | JCM16419_RS00705 | Firmicutes          | Paenibacillus pinihumi          | hypothetical protein [Paenibacillus pinihumi].                              | GCF_001312305.1 |
| WP_058710989.1 | HTH_20→  <-Trypsin<-ABhydrolase  ACET→  <-DUF2935<-PSE  SIG+SPRY*→                                                                                  | SIG+SPRY     | 306 | NS115_RS07620    | Firmicutes          | Paenibacillus                   | MULTISPECIES: hypothetical protein [Paenibacillus].                         | GCF_002872435.1 |
| WP_058830612.1 | HTH_20→  <-Trypsin<-ABhydrolase  ACET→  <-DUF2935<-?  SIG+SPRY*→                                                                                    | SIG+SPRY     | 339 | AVK83_RS16520    | Firmicutes          | Paenibacillus polymyxa          | hypothetical protein [Paenibacillus polymyxa].                              | GCF_001481575.1 |
| WP_058981995.1 | Phage_connect_1→ Phage_H_T_join→ HK97-gp10_like→ DUF3168→ Phage_TTP_11→ Phage_TAC_13→?→ SPRY+X*→?→?→?→ Phage-tail-tape→ ConA-repeats→               | SPRY+X       | 657 | BN1263_RS14155   | Gammaproteobacteria | Stenotrophomonas maltophilia    | hypothetical protein [Stenotrophomonas maltophilia].                        | GCF_001499715.1 |
| WP_059064521.1 | Phage_connect_1→ Phage_H_T_join→ HK97-gp10_like→ DUF3168→ Phage_TTP_11→ Phage_TAC_13→?→ SPRY+X*→?→ Phage-tail-tape→ ConA-repeats→?→ SRAP→           | SPRY+X       | 655 | AV528_RS10010    | Gammaproteobacteria | Stenotrophomonas maltophilia    | hypothetical protein [Stenotrophomonas maltophilia].                        | GCF_001499755.1 |
| WP_063211944.1 | HTH_20→  <-ABhydrolase<-?  ACET→ Cupin_2→ SIG+SPRY*→                                                                                                | SIG+SPRY     | 337 | AV545_RS14475    | Firmicutes          | Paenibacillus jamilae           | hypothetical protein [Paenibacillus jamilae].                               | GCF_001619755.1 |
| WP_064201871.1 | SPRY*→?→?→?→  <-?<-?<-?<-ABC-ATPase                                                                                                                 | SPRY         | 894 | A4S11_RS18990    | Firmicutes          | Brevibacillus brevis            | hypothetical protein [Brevibacillus brevis].                                | GCF_001649505.1 |
| WP_064796708.1 | HTH_20→  <-ABhydrolase<-Polbetant  ACET→ Cupin_2→  <-?  SIG+SPRY*→                                                                                  | SIG+SPRY     | 314 | A9P44_RS12255    | Firmicutes          | Paenibacillus polymyxa          | hypothetical protein [Paenibacillus polymyxa].                              | GCF_001663585.1 |
| WP_065179322.1 | Phage_connect_1→ Phage_H_T_join→ HK97-gp10_like→ DUF3168→ Phage_TTP_11→ Phage_TAC_13→?→ SPRY+X*→?→ Phage-tail-tape→                                 | SPRY+X       | 655 | A9K70_RS20570    | Gammaproteobacteria | Stenotrophomonas maltophilia    | hypothetical protein [Stenotrophomonas maltophilia].                        | GCF_001676395.1 |
| WP_065181897.1 | Phage_connect_1→ Phage_H_T_join→ HK97-gp10_like→ DUF3168→ Phage_TTP_11→ Phage_TAC_13→?→ SPRY+X*→  <-?  ?→?→ Phage-tail-tape→ ConA-repeats→          | SPRY+X       | 655 | A9K56_RS08050    | Gammaproteobacteria | Stenotrophomonas maltophilia    | hypothetical protein [Stenotrophomonas maltophilia].                        | GCF_001676315.1 |

| acc            | operon                                                                                                                                                | architecture     | len | gen.name      | taxend              | species                      | define                                                           | gca             |
|----------------|-------------------------------------------------------------------------------------------------------------------------------------------------------|------------------|-----|---------------|---------------------|------------------------------|------------------------------------------------------------------|-----------------|
| WP_065200553.1 | Phage_connect_1→ Phage_H_T_join→ HK97-gp10_like→ DUF3168→ Phage_TTP_11→ Phage_TAC_13→?→ SPRY+X*→  <-?  ?→?→?→<br>Phage-tail-tape→ ConA-repeats→ ConA→ | SPRY+X           | 655 | A9K58_RS17510 | Gamma               | Stenotrophomonas maltophilia | hypothetical protein [Stenotrophomonas maltophilia].             | GCF_001676385.1 |
| WP_068434738.1 | Cluster93_5clades→ Laminin_G_3+SPRY*→?→?→?→?→  <-?<-Cluster297_2clades<-EMAP                                                                          | Laminin_G_3+SPRY | 467 | XM1_RS14675   | Alphaproteobacteria | Magnetospirillum sp. XM-1    | hypothetical protein [Magnetospirillum sp. XM-1].                | GCF_001511835.1 |
| WP_068499071.1 | <-SUN<-?<-?  SIG+SPRY*→                                                                                                                               | SIG+SPRY         | 378 | BAZ21_RS08685 | Firmicutes          | Paenibacillus kribbensis     | hypothetical protein [Paenibacillus kribbensis].                 | GCF_001705305.1 |
| WP_068504121.1 | <-ABhydrolase  ?→  <-?  SIG+SPRY*→  <-PSE  SUN→                                                                                                       | SIG+SPRY         | 308 | BAZ21_RS19160 | Firmicutes          | Paenibacillus kribbensis     | hypothetical protein [Paenibacillus kribbensis].                 | GCF_001705305.1 |
| WP_068940847.1 | SUN→ SPRY+SUN→ <i>SPRY</i> → Disaggr_repeat→                                                                                                          | SPRY+SUN         | 698 | A7312_RS18605 | Firmicutes          | Paenibacillus polymyxa       | hypothetical protein [Paenibacillus polymyxa].                   | GCF_001707685.1 |
| WP_068940849.1 | -                                                                                                                                                     | -                | 419 | A7312_RS18610 | Firmicutes          | Paenibacillus polymyxa       | hypothetical protein [Paenibacillus polymyxa].                   | GCF_001707685.1 |
| WP_068941209.1 | -                                                                                                                                                     | -                | 320 | BK119_RS14035 | Firmicutes          | Paenibacillus                | MULTISPECIES: hypothetical protein [Paenibacillus].              | GCF_001922145.1 |
| WP_069010793.1 | HTH_20→  <-ABhydrolase<-Polbetant  ACET→ Cupin_2→ ABhydrolase→  <-DUF2935  SIG+SPRY*→?→  <-Glycos_transf_2                                            | SIG+SPRY         | 346 | A7311_RS06950 | Firmicutes          | Paenibacillus polymyxa       | hypothetical protein [Paenibacillus polymyxa].                   | GCF_001709075.1 |
| WP_069481585.1 | SUN+SPRY→?→?→?→ <i>SUN</i> → <i>SPRY</i> + <i>SUN</i> →                                                                                               | SUN+SPRY         | 559 | BG258_RS12185 | Firmicutes          | Lysinibacillus fusiformis    | discoidin domain-containing protein [Lysinibacillus fusiformis]. | GCF_001726065.1 |
| WP_069481589.1 | -                                                                                                                                                     | -                | 403 | BG258_RS12205 | Firmicutes          | Lysinibacillus fusiformis    | hypothetical protein [Lysinibacillus fusiformis].                | GCF_001726065.1 |
| WP_071558628.1 | <-SUN  SIG+SPRY*→  <-?<-?<-?<-?<-?<-Phage_holin_4_1                                                                                                   | SIG+SPRY         | 334 | CG775_RS21655 | Firmicutes          | Paenibacillus polymyxa       | hypothetical protein [Paenibacillus polymyxa].                   | GCF_001874425.3 |
| WP_071639359.1 | HTH_20→  <-ABhydrolase<-Polbetant  ACET→ Cupin_2→ ABhydrolase→  <-DUF2935  SIG+SPRY→?→ <i>SIG</i> + <i>SPRY</i> →<br>PSE→  <-Glycos_transf_2          | SIG+SPRY         | 373 | PPYC1_RS02475 | Firmicutes          | Paenibacillus polymyxa       | hypothetical protein [Paenibacillus polymyxa].                   | GCF_001874405.2 |
| WP_071639361.1 | -                                                                                                                                                     | -                | 323 | PPYC1_RS02485 | Firmicutes          | Paenibacillus polymyxa       | hypothetical protein [Paenibacillus polymyxa].                   | GCF_001874405.2 |
| WP_072733996.1 | SUN→ SUN→ SUN→ TM+SPRY+SUN→ <i>SPRY</i> → Disaggr_repeat→                                                                                             | TM+SPRY+SUN      | 708 | BUA17_RS14040 | Firmicutes          | Paenibacillus sp. ov031      | hypothetical protein [Paenibacillus sp. ov031].                  | GCF_900143165.1 |
| WP_072733997.1 | -                                                                                                                                                     | -                | 422 | BUA17_RS14045 | Firmicutes          | Paenibacillus sp. ov031      | discoidin domain-containing protein [Paenibacillus sp. ov031].   | GCF_900143165.1 |
| WP_075141582.1 | Cluster216_2clades→?→?→?→ SUN→ SPRY*→ PSE→ SUN→ SUN→ TM→ Cluster104_2clades→?→?→35exo→                                                                | SPRY             | 447 | RSJ3_RS04310  | Firmicutes          | Clostridium botulinum        | cell adhesion protein [Clostridium botulinum].                   | GCF_001921965.1 |
| WP_076158833.1 | <-ABhydrolase<-Polbetant  ACET→ Cupin_2→ ABhydrolase→  <-DUF2935  SIG+SPRY*→  <-PSE  ?→ PSE→  <-Glycos_transf_2                                       | SIG+SPRY         | 301 | BK134_RS12705 | Firmicutes          | Paenibacillus peoriae        | hypothetical protein [Paenibacillus peoriae].                    | GCF_001956115.1 |

| acc            | operon                                                                                                                               | architecture                                                 | len  | gen.name       | taxend              | species                      | define                                                                           | gca             |
|----------------|--------------------------------------------------------------------------------------------------------------------------------------|--------------------------------------------------------------|------|----------------|---------------------|------------------------------|----------------------------------------------------------------------------------|-----------------|
| WP_076172386.1 | Cluster171_2clades→?→?→ Cluster143_2clades→?→?→ PSE→ SUN→ SPRY*→ SUN→ TM→ Cluster104_2clades→?→?→35exo→ Cluster112_2clades→          | SPRY                                                         | 465  | N487_RS14900   | Firmicutes          | Clostridium botulinum        | cell adhesion protein [Clostridium botulinum].                                   | GCF_000710975.1 |
| WP_076252374.1 | SUN→ SPRY+SUN*→ SUN→ SUN→ Laminin_G_3→ Disaggr_repeat→                                                                               | SPRY+SUN                                                     | 403  | BK136_RS15140  | Firmicutes          | Paenibacillus amylolyticus   | hypothetical protein [Paenibacillus amylolyticus].                               | GCF_001956175.1 |
| WP_076265166.1 | <-ABhydrolase<-Polbetant  ACET→ Cupin_2→ ABhydrolase→  <-DUF2935<-?  SIG+SPRY*→  <-?  ?→ SIG+SPRY→  <-Glycos_transf_2                | SIG+SPRY                                                     | 320  | BK143_RS19680  | Firmicutes          | Paenibacillus peoriae        | hypothetical protein [Paenibacillus peoriae].                                    | GCF_001956225.1 |
| WP_076293278.1 | HTH_20→  <-PSE<-ABhydrolase<-Polbetant  ACET→ Cupin_2→ ABhydrolase→  <-DUF2935  SIG+SPRY*→  <-?  ?→ PSE→  <-Glycos_transf_2          | SIG+SPRY                                                     | 326  | BK135_RS10440  | Firmicutes          | Paenibacillus peoriae        | hypothetical protein [Paenibacillus peoriae].                                    | GCF_001956155.1 |
| WP_076295423.1 | <-ABhydrolase<-Polbetant  ACET→ Cupin_2→ ABhydrolase→  <-DUF2935<-?  SIG+SPRY→  <-?  ?→ SIG+SPRY→  <-Glycos_transf_2                 | SIG+SPRY                                                     | 331  | BK145_RS14470  | Firmicutes          | Paenibacillus peoriae        | hypothetical protein [Paenibacillus peoriae].                                    | GCF_001956235.1 |
| WP_076318343.1 | SUN→ SUN→ SUN→ SPRY+SUN*→ Laminin_G_3→ Disaggr_repeat→                                                                               | SPRY+SUN                                                     | 412  | BK124_RS08255  | Firmicutes          | Paenibacillus amylolyticus   | hypothetical protein [Paenibacillus amylolyticus].                               | GCF_001955995.1 |
| WP_076327021.1 | SUN→ SPRY+SUN*→ SUN→ Laminin_G_3→ Disaggr_repeat→                                                                                    | SPRY+SUN                                                     | 414  | BK129_RS03095  | Firmicutes          | Paenibacillus amylolyticus   | discoidin domain-containing protein [Paenibacillus amylolyticus].                | GCF_001956035.1 |
| WP_079564340.1 | SUN→ SPRY+SUN→ SUN→ SUN→ SPRY+SUN→ SUN→ SUN→ SUN→                                                                                    | SPRY+SUN                                                     | 485  | B5X66_RS24790  | Firmicutes          | unclassified Lysinibacillus  | MULTISPECIES: hypothetical protein [unclassified Lysinibacillus].                | GCF_900167885.1 |
| WP_079564349.1 | -                                                                                                                                    | -                                                            | 413  | B5X66_RS24805  | Firmicutes          | unclassified Lysinibacillus  | MULTISPECIES: discoidin domain-containing protein [unclassified Lysinibacillus]. | GCF_900167885.1 |
| WP_079564406.1 | SUN→ SUN→ SUN→ SPRY+SUN*→?→ SUN→ SUN→ SUN→ SUN→ SUN→                                                                                 | SPRY+SUN                                                     | 389  | B5X66_RS24915  | Firmicutes          | unclassified Lysinibacillus  | MULTISPECIES: discoidin domain-containing protein [unclassified Lysinibacillus]. | GCF_900167885.1 |
| WP_080291782.1 | DUF3168→ Phage_TTP_11→ Phage_TAC_13→?→ SPRY+X*→?→?→ Phage-tail-tape→ ConA-repeats→                                                   | SPRY+X                                                       | 655  | LI87_RS0109275 | Gammaproteobacteria | Stenotrophomonas maltophilia | hypothetical protein [Stenotrophomonas maltophilia].                             | GCF_000758465.1 |
| WP_080639352.1 | RHS_repeat+RHS_repeat+RHS_repeat+RHS_repeat+Laminin_G_3+SPRY*→?→?→ PSE→ PSE→35exo→                                                   | RHS_repeat+RHS_repeat+RHS_repeat+RHS_repeat+Laminin_G_3+SPRY | 2000 | YUK_RS0107305  | Gammaproteobacteria | Teredinibacter turnerae      | hypothetical protein [Teredinibacter turnerae].                                  | GCF_000379165.1 |
| WP_080974705.1 | Cluster143_2clades→?→?→?→?→ SPRY→ SPRY*→ PSE→ TM→ Cluster104_2clades→                                                                | SPRY                                                         | 311  | ADC50_RS20320  | Firmicutes          | Clostridium sporogenes       | hypothetical protein [Clostridium sporogenes].                                   | GCF_001058825.1 |
| WP_081280966.1 | Phage_connect_1→ Phage_H_T_join→ HK97-gp10_like→ DUF3168→ Phage_TTP_11→ Phage_TAC_13→?→ SPRY+X*→?→?→ Phage-tail-tape→                | SPRY+X                                                       | 655  | A9K69_RS19730  | Gammaproteobacteria | Stenotrophomonas maltophilia | hypothetical protein [Stenotrophomonas maltophilia].                             | GCF_001676445.1 |
| WP_084315242.1 | SIG+TM+TM+TM+TM+TM+TM+TM+TM→ SIG+TM+TM+TM+TM+TM+TM+TM+TM+TM→ ABC-ATPase→ SIG+TM+TM+TM+TM+ABC-ATPase→  <-?  ?→ SPRY+Big_2*→?→?→ ACET→ | SPRY+Big_2                                                   | 535  | BR69_RS21395   | Firmicutes          | Clostridium hydrogeniformans | Ig domain-containing protein [Clostridium hydrogeniformans].                     | GCF_000686705.1 |
| WP_084575678.1 | EMAP→ Cluster297_2clades→?→?→?→ SIG+SPRY*→?→?→?→?→ SIG+METHYLASE→                                                                    | SIG+SPRY                                                     | 349  | B9A22_RS10460  | Firmicutes          | Sporomusa malonica           | hypothetical protein [Sporomusa malonica].                                       | GCF_900176355.1 |

| acc            | operon                                                                                                                                          | architecture          | len  | gen.name       | taxend              | species                                   | define                                                                     | gca             |
|----------------|-------------------------------------------------------------------------------------------------------------------------------------------------|-----------------------|------|----------------|---------------------|-------------------------------------------|----------------------------------------------------------------------------|-----------------|
| WP_085321805.1 | Cluster171_2clades→?→?→ Cluster143_2clades→?→?→ PSE→ SUN→ SPRY*→ SUN→ TM→ Cluster104_2clades→?→?→35exo→ Cluster112_2clades→                     | SPRY                  | 447  | B2M06_RS15395  | Firmicutes          | Clostridium botulinum                     | cell adhesion protein [Clostridium botulinum].                             | GCF_002866045.1 |
| WP_085899262.1 | Phage_T7_tail→ SPRY*→                                                                                                                           | SPRY                  | 1359 | BKB51_RS01170  | Alphaproteobacteria | Kiloniella majae                          | hypothetical protein [Kiloniella majae].                                   | GCF_002118315.1 |
| WP_087445183.1 | SUN→ SPRY+SUN*→ SUN→ Laminin_G_3→ Disaggr_repeat→ Phage_holin_4_1→?→ SIG+ConA+beta-propeller→                                                   | SPRY+SUN              | 430  | FLT43_09110    | Firmicutes          | Paenibacillus thiaminolyticus             | hypothetical protein [Paenibacillus thiaminolyticus].                      | -               |
| WP_087803178.1 | Phage_connect_1→ Phage_H_T_join→ HK97-gp10_like→ DUF3168→ Phage_TTP_11→ Phage_TAC_13→?→ SPRY+X*→?→?→ Phage-tail-tape→ ConA-repeats→?→?→  <-SRAP | SPRY+X                | 657  | B7H27_RS11730  | Gammaproteobacteria | Stenotrophomonas maltophilia              | hypothetical protein [Stenotrophomonas maltophilia].                       | GCF_002189565.1 |
| WP_088432438.1 | Phage_connect_1→ Phage_H_T_join→ HK97-gp10_like→ DUF3168→ Phage_TTP_11→ Phage_TAC_13→?→ SPRY+X*→?→?→ Phage-tail-tape→ ConA-repeats→             | SPRY+X                | 658  | CEE60_RS02675  | Gammaproteobacteria | Stenotrophomonas maltophilia              | hypothetical protein [Stenotrophomonas maltophilia].                       | GCF_002205165.1 |
| WP_089986629.1 | SUN→ SPRY+SUN*→ DISCOIDIN→ SUN→ SUN→ SUN→ Laminin_G_3→ Disaggr_repeat→                                                                          | SPRY+SUN              | 433  | BLP61_RS17210  | Firmicutes          | Lysinibacillus fusiformis                 | discoidin domain-containing protein [Lysinibacillus fusiformis].           | GCF_900102355.1 |
| WP_090738921.1 | <-SUN<-?<-PSE  SIG+SPRY*→                                                                                                                       | SIG+SPRY              | 373  | BN1546_RS23290 | Firmicutes          | Paenibacillus sp. Mc5Re-14                | hypothetical protein [Paenibacillus sp. Mc5Re-14].                         | GCF_001049835.1 |
| WP_090920079.1 | SUN→ SUN→ SPRY+SUN*→ Laminin_G_3→ Disaggr_repeat→                                                                                               | SPRY+SUN              | 412  | BLQ13_RS12675  | Firmicutes          | Paenibacillus polysaccharolyticus         | discoidin domain-containing protein [Paenibacillus polysaccharolyticus].   | GCF_900102085.1 |
| WP_092074738.1 | SPRY+Big_2*→                                                                                                                                    | SPRY+Big_2            | 341  | H5X37_RS17715  | Firmicutes          | Dendrosporobacter quercicolus             | Ig-like domain-containing protein [Dendrosporobacter quercicolus].         | GCF_900104455.1 |
| WP_093534303.1 | Phage_connect_1→ Phage_H_T_join→ HK97-gp10_like→ DUF3168→ Phage_TTP_11→ Phage_TAC_13→?→ SPRY+X*→?→?→ Phage-tail-tape→                           | SPRY+X                | 655  | BQ2375_RS10775 | Gammaproteobacteria | Stenotrophomonas rhizophila               | hypothetical protein [Stenotrophomonas rhizophila].                        | GCF_900095765.1 |
| WP_094156505.1 | <-ABhydrolase<-?  SIG+SPRY→ SIG+SPRY→ SUN→  <-PSE<-Glycos_transf_2                                                                              | SIG+SPRY              | 358  | B4V02_RS22570  | Firmicutes          | Paenibacillus kribbensis                  | hypothetical protein [Paenibacillus kribbensis].                           | GCF_002240415.1 |
| WP_094936690.1 | SUN→ SPRY+SUN*→ SUN→ Laminin_G_3→ Disaggr_repeat→                                                                                               | SPRY+SUN              | 423  | CA599_RS04535  | Firmicutes          | Paenibacillus taichungensis               | discoidin domain-containing protein [Paenibacillus taichungensis].         | GCF_002264305.1 |
| WP_095523199.1 | Cluster180_2clades→?→?→ Cluster242_2clades→?→?→?→ VWA+Phage-tail_3+SPRY*→?→?→ DAM→                                                              | VWA+Phage-tail_3+SPRY | 1093 | BSR46_RS01740  | Betaproteobacteria  | Candidatus Dactylopiibacterium carminicum | VWA domain-containing protein [Candidatus Dactylopiibacterium carminicum]. | GCF_002284975.1 |
| WP_095529535.1 | Cluster180_2clades→?→?→ Cluster242_2clades→?→?→?→ VWA+Phage-tail_3+SPRY*→?→?→ DAM→                                                              | VWA+Phage-tail_3+SPRY | 1093 | CGU28_RS03090  | Betaproteobacteria  | Candidatus Dactylopiibacterium carminicum | VWA domain-containing protein [Candidatus Dactylopiibacterium carminicum]. | GCF_002284935.1 |

| acc            | operon                                                                                                                                          | architecture | len | gen.name      | taxend              | species                               | define                                                        | gca             |
|----------------|-------------------------------------------------------------------------------------------------------------------------------------------------|--------------|-----|---------------|---------------------|---------------------------------------|---------------------------------------------------------------|-----------------|
| WP_097012028.1 | Phage_T7_tail→ SUN+SPRY*→ Phage_tail_APC→                                                                                                       | SUN+SPRY     | 749 | DPRO_RS10715  | Deltaproteobacteria | Pseudodesulfovibrio profundus         | hypothetical protein [Pseudodesulfovibrio profundus].         | GCF_900217235.1 |
| WP_097053084.1 | SPRY*→                                                                                                                                          | SPRY         | 749 | CRO34_RS20720 | Alphaproteobacteria | Thalassospira xiamenensis             | hypothetical protein [Thalassospira xiamenensis].             | GCF_900217835.1 |
| WP_099470440.1 | Phage_connect_1→ Phage_H_T_join→ HK97-gp10_like→ DUF3168→ Phage_TTP_11→ Phage_TAC_13→?→ SPRY+X*→?→?→ Phage-tail-tape→ ConA-repeats→?→?→ SRAP→   | SPRY+X       | 657 | BRB94_RS07965 | Gammaproteobacteria | Stenotrophomonas maltophilia          | hypothetical protein [Stenotrophomonas maltophilia].          | GCF_002739365.1 |
| WP_099473308.1 | Phage_connect_1→ Phage_H_T_join→ HK97-gp10_like→ DUF3168→ Phage_TTP_11→ Phage_TAC_13→?→ SPRY+X*→?→?→ Phage-tail-tape→ ConA-repeats→?→?→ SRAP→   | SPRY+X       | 657 | BRB96_RS16380 | Gammaproteobacteria | Stenotrophomonas maltophilia          | hypothetical protein [Stenotrophomonas maltophilia].          | GCF_002739315.1 |
| WP_099475740.1 | Phage_TAC_13→?→ SPRY+X*→?→ Phage-tail-tape→?→?→?→ SRAP→                                                                                         | SPRY+X       | 657 | BRB49_RS05320 | Gammaproteobacteria | Stenotrophomonas maltophilia          | hypothetical protein [Stenotrophomonas maltophilia].          | GCF_002739555.1 |
| WP_099491760.1 | Phage_connect_1→ Phage_H_T_join→ HK97-gp10_like→ DUF3168→ Phage_TTP_11→ Phage_TAC_13→?→ SPRY+X*→?→?→ Phage-tail-tape→ ConA-repeats→?→?→  <-SRAP | SPRY+X       | 657 | BRB88_RS10470 | Gammaproteobacteria | Stenotrophomonas maltophilia          | hypothetical protein [Stenotrophomonas maltophilia].          | GCF_002739275.1 |
| WP_099494832.1 | Phage_connect_1→ Phage_H_T_join→ HK97-gp10_like→ DUF3168→ Phage_TTP_11→ Phage_TAC_13→?→ SPRY+X*→?→ Phage-tail-tape→ ConA-repeats→ ConA→         | SPRY+X       | 655 | BRC08_RS17670 | Gammaproteobacteria | Stenotrophomonas maltophilia          | hypothetical protein [Stenotrophomonas maltophilia].          | GCF_002739465.1 |
| WP_099529564.1 | Phage_connect_1→ Phage_H_T_join→ HK97-gp10_like→ DUF3168→ Phage_TTP_11→ Phage_TAC_13→?→ PSE→ SPRY+X*→?→ Phage-tail-tape→ ConA-repeats→          | SPRY+X       | 657 | BRB33_RS00490 | Gammaproteobacteria | Stenotrophomonas maltophilia          | hypothetical protein [Stenotrophomonas maltophilia].          | GCF_002738715.1 |
| WP_099539415.1 | Phage_connect_1→ Phage_H_T_join→ HK97-gp10_like→ DUF3168→ Phage_TTP_11→ Phage_TAC_13→?→ SPRY+X*→?→ Phage-tail-tape→ ConA-repeats→               | SPRY+X       | 657 | BRB39_RS15215 | Gammaproteobacteria | Stenotrophomonas maltophilia          | hypothetical protein [Stenotrophomonas maltophilia].          | GCF_002738665.1 |
| WP_099539896.1 | Phage_connect_1→ Phage_H_T_join→ HK97-gp10_like→ DUF3168→ Phage_TTP_11→ Phage_TAC_13→?→ SPRY+X*→?→ Phage-tail-tape→                             | SPRY+X       | 656 | BRB48_RS14865 | Gammaproteobacteria | Stenotrophomonas maltophilia          | hypothetical protein [Stenotrophomonas maltophilia].          | GCF_002738885.1 |
| WP_099553167.1 | Phage_connect_1→ Phage_H_T_join→ HK97-gp10_like→ DUF3168→ Phage_TTP_11→ Phage_TAC_13→?→ SPRY+X*→?→?→ Phage-tail-tape→ ConA-repeats→?→?→  <-SRAP | SPRY+X       | 657 | BRC04_RS15490 | Gammaproteobacteria | Stenotrophomonas maltophilia          | hypothetical protein [Stenotrophomonas maltophilia].          | GCF_002739455.1 |
| WP_099605638.1 | Phage_connect_1→ Phage_H_T_join→ HK97-gp10_like→ DUF3168→ Phage_TTP_11→ Phage_TAC_13→?→ SPRY+X*→?→ Phage-tail-tape→ ConA-repeats→?→?→  <-SRAP   | SPRY+X       | 657 | BRC06_RS15605 | Gammaproteobacteria | Stenotrophomonas maltophilia          | hypothetical protein [Stenotrophomonas maltophilia].          | GCF_002740185.1 |
| WP_099654222.1 | SPRY*→                                                                                                                                          | SPRY         | 991 | BJV55_RS14285 | Gammaproteobacteria | Rhodanobacter sp. TND4EH1             | hypothetical protein [Rhodanobacter sp. TND4EH1].             | GCF_002749725.1 |
| WP_099854778.1 | SUN→ SPRY+SUN*→ SUN→ SUN→ SUN→ Laminin_G_3→ Disaggr_repeat→                                                                                     | SPRY+SUN     | 425 | CS562_RS07475 | Firmicutes          | Paenibacillus sp. LK1                 | discoidin domain-containing protein [Paenibacillus sp. LK1].  | GCF_002750415.1 |
| WP_099858289.1 | SPRY+SUN*→ SUN→ Laminin_G_3→ Disaggr_repeat→ Phage_holin_4_1→                                                                                   | SPRY+SUN     | 410 | CS562_RS22615 | Firmicutes          | Paenibacillus sp. LK1                 | hypothetical protein [Paenibacillus sp. LK1].                 | GCF_002750415.1 |
| WP_100317531.1 | Phage-tail-tape→?→?→ SPRY+X*→?→ DAM→                                                                                                            | SPRY+X       | 655 | CO615_RS10755 | Gammaproteobacteria | Xanthomonadaceae bacterium NML75-0749 | hypothetical protein [Xanthomonadaceae bacterium NML75-0749]. | GCF_002798185.1 |

| acc            | operon                                                                                                                                    | architecture        | len  | gen.name      | taxend              | species                               | define                                                                   | gca             |
|----------------|-------------------------------------------------------------------------------------------------------------------------------------------|---------------------|------|---------------|---------------------|---------------------------------------|--------------------------------------------------------------------------|-----------------|
| WP_100438259.1 | Phage_connect_1→ Phage_H_T_join→ HK97-gp10_like→ DUF3168→ Phage_TTP_11→ Phage_TAC_13→?→ SPRY+X*→?→?→ Phage-tail-tape→ ConA-repeats→       | SPRY+X              | 658  | B9Y60_RS06960 | Gammaproteobacteria | Stenotrophomonas maltophilia          | hypothetical protein [Stenotrophomonas maltophilia].                     | GCF_002799135.1 |
| WP_100443561.1 | Phage_connect_1→ Phage_H_T_join→ HK97-gp10_like→ DUF3168→ Phage_TTP_11→ Phage_TAC_13→?→ SPRY+X*→?→ Phage-tail-tape→ ConA-repeats→         | SPRY+X              | 657  | B9Y57_RS09005 | Gammaproteobacteria | Stenotrophomonas maltophilia          | hypothetical protein [Stenotrophomonas maltophilia].                     | GCF_002798925.1 |
| WP_100474847.1 | Phage_connect_1→ Phage_H_T_join→ HK97-gp10_like→ DUF3168→ Phage_TTP_11→ Phage_TAC_13→?→ SPRY+X*→?→?→ Phage-tail-tape→                     | SPRY+X              | 657  | B9Y82_RS18595 | Gammaproteobacteria | Stenotrophomonas maltophilia          | hypothetical protein [Stenotrophomonas maltophilia].                     | GCF_002799155.1 |
| WP_102039859.1 | Glyco_hydro_16+SPRY*→                                                                                                                     | Glyco_hydro_16+SPRY | 1003 | CXF86_RS19745 | Gammaproteobacteria | Shewanella sp. GutCb                  | DUF1833 family protein [Shewanella sp. GutCb].                           | GCF_002836135.1 |
| WP_102945666.1 | Phage_H_T_join→ HK97-gp10_like→ DUF3168→ Phage_TTP_11→ Phage_TAC_13→?→ SPRY+X*→?→ Phage-tail-tape→                                        | SPRY+X              | 655  | C2U58_RS09715 | Gammaproteobacteria | Stenotrophomonas sp. VV52             | hypothetical protein [Stenotrophomonas sp. VV52].                        | GCF_002893095.1 |
| WP_103046829.1 | <-Trypsin<-ABhydrolase<-Polbetant  ACET→ Cupin_2→  <-DUF2935<-?  SIG+SPRY*→                                                               | SIG+SPRY            | 326  | C1T21_RS00825 | Firmicutes          | Paenibacillus sp. F4                  | hypothetical protein [Paenibacillus sp. F4].                             | GCF_002894905.1 |
| WP_103744628.1 | -                                                                                                                                         | -                   | 320  | CG775_RS10930 | Firmicutes          | Paenibacillus polymyxa                | hypothetical protein [Paenibacillus polymyxa].                           | GCF_002916985.1 |
| WP_103977131.1 | SUN→ SUN→ SUN→ SUN+SPRY*→ Disaggr_repeat→?→?→ Phage_holin_1→                                                                              | SUN+SPRY            | 980  | LYSIN_RS10210 | Firmicutes          | Lysinibacillus sphaericus             | hypothetical protein [Lysinibacillus sphaericus].                        | GCF_002923795.1 |
| WP_104497237.1 | HTH_20→  <-ABhydrolase<-Polbetant  ACET→ Cupin_2→  <-DUF2935  SIG+SPRY*→  <-?  ?→  <-Glycos_transf_2                                      | SIG+SPRY            | 332  | C5G87_RS19490 | Firmicutes          | Paenibacillus peoriae                 | hypothetical protein [Paenibacillus peoriae].                            | GCF_002937395.1 |
| WP_105407850.1 | SUN→ SPRY+SUN*→ SUN→ Laminin_G_3→ Disaggr_repeat→                                                                                         | SPRY+SUN            | 419  | C0Q44_RS13525 | Firmicutes          | Paenibacillus sp. PCH8                | hypothetical protein [Paenibacillus sp. PCH8].                           | GCF_002968835.1 |
| WP_106549337.1 | Phage_connect_1→ Phage_H_T_join→ HK97-gp10_like→ DUF3168→ Phage_TTP_11→ Phage_TAC_13→ SPRY+X*→  <-?  ?→ Phage-tail-tape→ ConA-repeats→    | SPRY+X              | 657  | CV100_RS06160 | Gammaproteobacteria | Stenotrophomonas maltophilia          | hypothetical protein [Stenotrophomonas maltophilia].                     | GCF_003015035.1 |
| WP_106891819.1 | SPRY*→?→?→ DAM→                                                                                                                           | SPRY                | 820  | C7S18_RS12140 | Gammaproteobacteria | Ahniella affigens                     | hypothetical protein [Ahniella affigens].                                | GCF_003015185.1 |
| WP_107951039.1 | SUN→ SPRY+SUN→ <i>SPRY+SUN</i> → SUN→ SUN→ Laminin_G_3→ Disaggr_repeat→?→?→ Phage_holin_1→                                                | SPRY+SUN            | 435  | C9J32_RS17875 | Firmicutes          | Lysinibacillus parviboronicapiens     | discoidin domain-containing protein [Lysinibacillus parviboronicapiens]. | GCF_003049605.1 |
| WP_107951040.1 | -                                                                                                                                         | -                   | 411  | C9J32_RS17880 | Firmicutes          | Lysinibacillus parviboronicapiens     | discoidin domain-containing protein [Lysinibacillus parviboronicapiens]. | GCF_003049605.1 |
| WP_107981750.1 | SPRY*→                                                                                                                                    | SPRY                | 401  | B5V90_RS01965 | Firmicutes          | Bacillus sporothermodurans            | hypothetical protein [Bacillus sporothermodurans].                       | GCF_003055065.1 |
| WP_108753440.1 | Phage_H_T_join→ HK97-gp10_like→ DUF3168→  <-?  Phage_TTP_11→ Phage_TAC_13→?→ SPRY+X*→?→?→ Phage-tail-tape→ ConA-repeats→ ConA→?→  <-SRAP  | SPRY+X              | 657  | C1933_RS11930 | Gammaproteobacteria | Stenotrophomonas sp. ZAC14D2_NAIMI4_6 | hypothetical protein [Stenotrophomonas sp. ZAC14D2_NAIMI4_6].            | GCF_003086875.1 |
| WP_108762304.1 | Phage_connect_1→ Phage_H_T_join→ HK97-gp10_like→ DUF3168→ Phage_TTP_11→ Phage_TAC_13→?→ SPRY+X*→?→?→ Phage-tail-tape→ ConA-repeats→ ConA→ | SPRY+X              | 657  | C1932_RS11845 | Gammaproteobacteria | Stenotrophomonas sp. YAU14D1_LEIMI4_1 | hypothetical protein [Stenotrophomonas sp. YAU14D1_LEIMI4_1].            | GCF_003086815.1 |



| acc            | operon                                                                                                                                              | architecture | len | gen.name      | taxend              | species                              | define                                                          | gca             |
|----------------|-----------------------------------------------------------------------------------------------------------------------------------------------------|--------------|-----|---------------|---------------------|--------------------------------------|-----------------------------------------------------------------|-----------------|
| WP_108767941.1 | Phage_connect_1→ Phage_H_T_join→ HK97-gp10_like→ DUF3168→ Phage_TTP_11→ Phage_TAC_13→?→ SPRY+X*→?→?→ Phage-tail-tape→ ConA-repeats→?→  <-SRAP       | SPRY+X       | 655 | C1925_RS05020 | Gammaproteobacteria | Stenotrophomonas sp. SAU14A_NAIMI4_5 | hypothetical protein [Stenotrophomonas sp. SAU14A_NAIMI4_5].    | GCF_003086795.1 |
| WP_109073515.1 | SIG+SPRY*→ Phage_tail_APC→?→ Phage_lysozyme→                                                                                                        | SIG+SPRY     | 399 | TSH20_RS03980 | Alphaproteobacteria | unclassified Azospirillum            | MULTISPECIES: hypothetical protein [unclassified Azospirillum]. | GCF_003115945.1 |
| WP_109150419.1 | SIG+SPRY*→ Phage_tail_APC→ Phage_lysozyme→ Cluster368_2clades→                                                                                      | SIG+SPRY     | 399 | TSO5_RS04345  | Alphaproteobacteria | Azospirillum sp. TSO5                | hypothetical protein [Azospirillum sp. TSO5].                   | GCF_003116065.1 |
| WP_109813956.1 | Phage_connect_1→ Phage_H_T_join→ HK97-gp10_like→ DUF3168→ Phage_TTP_11→ Phage_TAC_13→?→ SPRY+X*→  <-?  ?→?→ Phage-tail-tape→ ConA-repeats→          | SPRY+X       | 657 | DKY64_RS04935 | Gammaproteobacteria | Stenotrophomonas maltophilia         | hypothetical protein [Stenotrophomonas maltophilia].            | GCF_003172845.1 |
| WP_110895171.1 | -                                                                                                                                                   | -            | 698 | HUB98_RS06520 | Firmicutes          | Paenibacillus barcinonensis          | hypothetical protein [Paenibacillus barcinonensis].             | GCF_013347305.1 |
| WP_110932422.1 | SPRY+SUN*→ SUN→ Laminin_G_3→ Disaggr_repeat→ Phage_holin_4_1→                                                                                       | SPRY+SUN     | 419 | CZ379_RS15410 | Firmicutes          | Paenibacillus bouchesdurhonensis     | hypothetical protein [Paenibacillus bouchesdurhonensis].        | GCF_900155685.1 |
| WP_111008118.1 | Phage_connect_1→ Phage_H_T_join→ HK97-gp10_like→ DUF3168→ Phage_TTP_11→ Phage_TAC_13→?→ SPRY+X*→?→?→ Phage-tail-tape→ ConA-repeats→ ConA→           | SPRY+X       | 655 | A7X97_RS14925 | Gammaproteobacteria | Stenotrophomonas maltophilia         | hypothetical protein [Stenotrophomonas maltophilia].            | GCF_003244875.1 |
| WP_111096871.1 | Phage_connect_1→ Phage_H_T_join→ HK97-gp10_like→ DUF3168→ Phage_TTP_11→ Phage_TAC_13→?→ SPRY+X*→?→?→ Phage-tail-tape→ ConA-repeats→ ConA→?→  <-SRAP | SPRY+X       | 655 | A7X84_RS18825 | Gammaproteobacteria | Stenotrophomonas maltophilia         | hypothetical protein [Stenotrophomonas maltophilia].            | GCF_003244495.1 |
| WP_111113613.1 | Phage_connect_1→ Phage_H_T_join→ HK97-gp10_like→ DUF3168→ Phage_TTP_11→ Phage_TAC_13→?→ SPRY+X*→?→ Phage-tail-tape→ ConA-repeats→ ConA→?→ SRAP→     | SPRY+X       | 655 | A7X83_RS21130 | Gammaproteobacteria | Stenotrophomonas maltophilia         | hypothetical protein [Stenotrophomonas maltophilia].            | GCF_003244775.1 |
| WP_111118812.1 | Phage_connect_1→ Phage_H_T_join→ HK97-gp10_like→ DUF3168→ Phage_TTP_11→ Phage_TAC_13→?→ SPRY+X*→?→?→ Phage-tail-tape→ ConA-repeats→?→?→  <-SRAP     | SPRY+X       | 657 | A7X74_RS15970 | Gammaproteobacteria | Stenotrophomonas maltophilia         | hypothetical protein [Stenotrophomonas maltophilia].            | GCF_003244465.1 |
| WP_111176598.1 | Phage_connect_1→ Phage_H_T_join→ HK97-gp10_like→ DUF3168→ Phage_TTP_11→ Phage_TAC_13→?→ SPRY+X*→?→ Phage-tail-tape→ ConA-repeats→?→  <-SRAP         | SPRY+X       | 655 | A7X87_RS07275 | Gammaproteobacteria | Stenotrophomonas maltophilia         | hypothetical protein [Stenotrophomonas maltophilia].            | GCF_003244795.1 |
| WP_111187870.1 | Phage_connect_1→ Phage_H_T_join→ HK97-gp10_like→ DUF3168→ Phage_TTP_11→ Phage_TAC_13→ SPRY+X*→?→ Phage-tail-tape→ ConA-repeats→?→?→ SRAP→           | SPRY+X       | 657 | A7X60_RS00295 | Gammaproteobacteria | Stenotrophomonas maltophilia         | hypothetical protein [Stenotrophomonas maltophilia].            | GCF_003244645.1 |
| WP_111203746.1 | Phage_connect_1→ Phage_H_T_join→ HK97-gp10_like→ DUF3168→ Phage_TTP_11→ Phage_TAC_13→?→ SPRY+X*→?→?→ Phage-tail-tape→ ConA-repeats→?→?→ SRAP→       | SPRY+X       | 657 | A7X75_RS09430 | Gammaproteobacteria | Stenotrophomonas maltophilia         | hypothetical protein [Stenotrophomonas maltophilia].            | GCF_003244735.1 |
| WP_117310047.1 | Phage_H_T_join→ HK97-gp10_like→ DUF3168→  <-?  Phage_TTP_11→ Phage_TAC_13→?→ SPRY+X*→?→ Phage-tail-tape→ ConA-repeats→?→ SRAP→                      | SPRY+X       | 655 | D0Y85_RS07625 | Gammaproteobacteria | Stenotrophomonas sp. G4              | hypothetical protein [Stenotrophomonas sp. G4].                 | GCF_003428825.1 |
| WP_119554390.1 | SPRY*→                                                                                                                                              | SPRY         | 674 | D3H34_RS15355 | Betaproteobacteria  | Acidovorax cavernicola               | hypothetical protein [Acidovorax cavernicola].                  | GCF_003581445.1 |
| WP_119798183.1 | SUN→ SUN→?→ SPRY*→ Disaggr_repeat→?→ Phage_holin_4_1→                                                                                               | SPRY         | 707 | D3P07_RS00690 | Firmicutes          | Paenibacillus sp. 1011MAR3C5         | hypothetical protein [Paenibacillus sp. 1011MAR3C5].            | GCF_003591485.1 |
| WP_120033984.1 | SPRY*→?→?→ Phage_holin_1→                                                                                                                           | SPRY         | 411 | CJ483_RS08545 | Firmicutes          | Bacillus sp. PK3_68                  | hypothetical protein [Bacillus sp. PK3_68].                     | GCF_003600835.1 |

| acc            | operon                                                                                                                                                       | architecture                                                                                                                            | len  | gen.name      | taxend              | species                         | define                                                                              | gca             |
|----------------|--------------------------------------------------------------------------------------------------------------------------------------------------------------|-----------------------------------------------------------------------------------------------------------------------------------------|------|---------------|---------------------|---------------------------------|-------------------------------------------------------------------------------------|-----------------|
| WP_120225163.1 | Cluster165_3clades→?→  <?  ?→?→ SPRY*→                                                                                                                       | SPRY                                                                                                                                    | 554  | CLY44_RS11090 | Alphaproteobacteria | Thalassospira sp. DSM 26710     | hypothetical protein [Thalassospira sp. DSM 26710].                                 | GCF_003610215.1 |
| WP_120497558.1 | Phage_T7_tail→ SPRY*→                                                                                                                                        | SPRY                                                                                                                                    | 1175 | D9A03_RS12780 | Alphaproteobacteria | Kiloniella sp. EL199            | hypothetical protein [Kiloniella sp. EL199].                                        | GCF_900313065.1 |
| WP_120498928.1 | <-ACET  ?→?→?→?→?→ Beta-Roll+Beta-Roll+Beta-Roll+Beta-Roll+BetaPropeller+Beta-Roll+CADHERIN+Beta-Roll+CADHERIN+Beta-Roll+Beta-Roll+BetaPropeller+Beta-Roll*→ | Beta-Roll+Beta-Roll+Beta-Roll+Beta-Roll+BetaPropeller+Beta-Roll+CADHERIN+Beta-Roll+CADHERIN+Beta-Roll+Beta-Roll+BetaPropeller+Beta-Roll | 4942 | D9A03_RS19645 | Alphaproteobacteria | Kiloniella sp. EL199            | hypothetical protein [Kiloniella sp. EL199].                                        | GCF_900313065.1 |
| WP_121219693.1 | SPRY+CARDB*→                                                                                                                                                 | SPRY+CARDB                                                                                                                              | 601  | BCL74_RS10110 | Alphaproteobacteria | Oceanibaculum indicum           | hypothetical protein [Oceanibaculum indicum].                                       | GCF_003633955.1 |
| WP_122906669.1 | SUN→ SPRY+SUN*→ Laminin_G_3→ Disaggr_repeat→?→?→ Phage_holin→                                                                                                | SPRY+SUN                                                                                                                                | 424  | EDM57_RS21100 | Firmicutes          | Brevibacillus gelatini          | discoidin domain-containing protein [Brevibacillus gelatini].                       | GCF_003710935.1 |
| WP_123769372.1 | Phage-tail-tape→?→?→?→?→ SPRY+X*→?→ DAM→?→  <?  ?→  <-Redoxin                                                                                                | SPRY+X                                                                                                                                  | 660  | EDC50_RS05235 | Gammaproteobacteria | Vulcaniibacterium tengchongense | hypothetical protein [Vulcaniibacterium tengchongense].                             | GCF_003814555.1 |
| WP_123796746.1 | HTH_20→  <-Trypsin<-ABhydrolase  ACET→  <-DUF2935<-?  SIG+SPRY*→                                                                                             | SIG+SPRY                                                                                                                                | 332  | EG487_RS02750 | Firmicutes          | Paenibacillus polymyxa          | hypothetical protein [Paenibacillus polymyxa].                                      | GCF_003813765.1 |
| WP_123958466.1 | Phage_connect_1→ Phage_H_T_join→ HK97-gp10_like→ DUF3168→ Phage_TTP_11→ Phage_TAC_13→?→ SPRY+X*→?→ Phage-tail-tape→ ConA-repeats→                            | SPRY+X                                                                                                                                  | 657  | EGY09_RS07240 | Gammaproteobacteria | Stenotrophomonas maltophilia    | hypothetical protein [Stenotrophomonas maltophilia].                                | GCF_003812985.1 |
| WP_124116383.1 | SUN→ SPRY+SUN→ <i>SPRY</i> → Disaggr_repeat→ Phage_holin_4_1→                                                                                                | SPRY+SUN                                                                                                                                | 707  | EDO6_RS18680  | Firmicutes          | Paenibacillus xylanexedens      | hypothetical protein [Paenibacillus xylanexedens].                                  | GCF_003833245.1 |
| WP_124116384.1 | -                                                                                                                                                            | -                                                                                                                                       | 413  | EDO6_RS18685  | Firmicutes          | Paenibacillus xylanexedens      | discoidin domain-containing protein [Paenibacillus xylanexedens].                   | GCF_003833245.1 |
| WP_124650057.1 | Arm-DNA-bind_3+SPRY*→                                                                                                                                        | Arm-DNA-bind_3+SPRY                                                                                                                     | 469  | DIE19_RS04180 | Betaproteobacteria  | Burkholderia sp. Bp9126         | integrase arm-type DNA-binding domain-containing protein [Burkholderia sp. Bp9126]. | GCF_003853715.1 |
| WP_125335565.1 | SPRY*→?→ Phage_lysozyme→                                                                                                                                     | SPRY                                                                                                                                    | 816  | EGJ58_RS22040 | Alphaproteobacteria | Ochrobactrum anthropi           | hypothetical protein [Ochrobactrum anthropi].                                       | GCF_003937425.1 |
| WP_129381357.1 | SUN→ SPRY+SUN→ <i>SPRY+SUN</i> → Laminin_G_3→ Disaggr_repeat→ Phage_holin_4_1→                                                                               | SPRY+SUN                                                                                                                                | 423  | EBB07_RS29185 | Firmicutes          | Paenibacillaceae bacterium      | hypothetical protein [Paenibacillaceae bacterium].                                  | GCF_004134985.1 |
| WP_129381358.1 | -                                                                                                                                                            | -                                                                                                                                       | 415  | EBB07_RS29190 | Firmicutes          | Paenibacillaceae bacterium      | hypothetical protein [Paenibacillaceae bacterium].                                  | GCF_004134985.1 |
| WP_130767937.1 | Phage_connect_1→ Phage_H_T_join→ HK97-gp10_like→ DUF3168→ Phage_TTP_11→ Phage_TAC_13→?→ SPRY+X*→?→ Phage-tail-tape→ ConA-repeats→ ConA→?→ PSE→  <?  SRAP→    | SPRY+X                                                                                                                                  | 655  | STNY_RS04735  | Gammaproteobacteria | Stenotrophomonas sp. Y          | hypothetical protein [Stenotrophomonas sp. Y].                                      | GCF_004306035.1 |
| WP_134709562.1 | Phage_connect_1→ Phage_H_T_join→ HK97-gp10_like→ DUF3168→ Phage_TTP_11→ Phage_TAC_13→?→ SPRY+X*→?→?→ Phage-tail-tape→ ConA-repeats→ ConA→                    | SPRY+X                                                                                                                                  | 655  | EUA01_RS04295 | Gammaproteobacteria | Stenotrophomonas maltophilia    | hypothetical protein [Stenotrophomonas maltophilia].                                | GCF_004522395.1 |

| acc            | operon                                                                                                                                          | architecture                                  | len  | gen.name             | taxend              | species                                      | define                                                               | gca             |
|----------------|-------------------------------------------------------------------------------------------------------------------------------------------------|-----------------------------------------------|------|----------------------|---------------------|----------------------------------------------|----------------------------------------------------------------------|-----------------|
| WP_134729602.1 | Phage_connect_1→ Phage_H_T_join→ HK97-gp10_like→ DUF3168→ Phage_TTP_11→ Phage_TAC_13→?→ SPRY+X*→?→?→ Phage-tail-tape→ ConA-repeats→?→?→  <-SRAP | SPRY+X                                        | 657  | EUA00_RS03030        | Gammaproteobacteria | Stenotrophomonas maltophilia                 | hypothetical protein [Stenotrophomonas maltophilia].                 | GCF_004522355.1 |
| WP_136006293.1 | Phage_connect_1→ Phage_H_T_join→ HK97-gp10_like→ DUF3168→ Phage_TTP_11→ Phage_TAC_13→?→ SPRY+X*→?→ Phage-tail-tape→                             | SPRY+X                                        | 656  | E5352_RS15345        | Gammaproteobacteria | Stenotrophomonas maltophilia                 | hypothetical protein [Stenotrophomonas maltophilia].                 | GCF_004794075.1 |
| WP_136702221.1 | SPRY*→ Phage_tail_APC→                                                                                                                          | SPRY                                          | 539  | E6C67_RS08475        | Alphaproteobacteria | Azospirillum sp. TSA2s                       | hypothetical protein [Azospirillum sp. TSA2s].                       | GCF_004923315.1 |
| WP_136702953.1 | SPRY*→?→?→ Cluster153_2clades→                                                                                                                  | SPRY                                          | 708  | E6C67_RS14155        | Alphaproteobacteria | Azospirillum sp. TSA2s                       | hypothetical protein [Azospirillum sp. TSA2s].                       | GCF_004923315.1 |
| WP_137222083.1 | Redoxin→  <-tRNA<-?  ?→  <-tRNA<-tRNA<-tRNA  ?→?→ SIG+SPRY+Cohesin*→                                                                            | SIG+SPRY+Cohesin                              | 509  | PaeCFBP13512_RS05670 | Firmicutes          | Paenibacillus sp. CFBP13512                  | hypothetical protein [Paenibacillus sp. CFBP13512].                  | GCF_005233705.1 |
| WP_140785213.1 | SPRY+Laminin_G_3*→                                                                                                                              | SPRY+Laminin_G_3                              | 473  | FJ417_RS24630        | Alphaproteobacteria | Mesorhizobium sp. B3-1-7                     | hypothetical protein [Mesorhizobium sp. B3-1-7].                     | GCF_006439385.1 |
| WP_140977547.1 | SPRY+Clostridium_P47+TM+TM+TM*→                                                                                                                 | SPRY+Clostridium_P47+TM+TM+TM                 | 750  | C2U70_RS08460        | Alphaproteobacteria | Bradyrhizobium guangdongense                 | TULIP family P47-like protein [Bradyrhizobium guangdongense].        | GCF_006483445.1 |
| WP_144787026.1 | SUN→ SUN→ SUN→ SUN→ SUN→ SPRY+SUN*→ SUN→ Laminin_G_3→ Disaggr_repeat→?→?→ Phage_holin_1→                                                        | SPRY+SUN                                      | 427  | FS727_RS01315        | Firmicutes          | Lysinibacillus fusiformis                    | discoidin domain-containing protein [Lysinibacillus fusiformis].     | GCF_007678325.1 |
| WP_145413289.1 | SUN→ SUN→ SPRY+SUN*→ Laminin_G_3→ Disaggr_repeat→ Phage_holin_4_1→                                                                              | SPRY+SUN                                      | 411  | FS823_RS10960        | Firmicutes          | Paenibacillus xylanexedens                   | discoidin domain-containing protein [Paenibacillus xylanexedens].    | GCF_007679855.1 |
| WP_145958251.1 | Phage-tail-tape→ PSE→?→?→?→ SPRY+X*→?→ DAM→                                                                                                     | SPRY+X                                        | 658  | C0575_RS17020        | Gammaproteobacteria | Xanthomonas                                  | MULTISPECIES: hypothetical protein [Xanthomonas].                    | GCF_002759275.1 |
| WP_147429703.1 | <-REC+OmpR-HTH<-?<-?<-?<-?  RHS_repeat+RHS_repeat+RHS_repeat+IG+SPRY+SPRY*→                                                                     | RHS_repeat+RHS_repeat+RHS_repeat+IG+SPRY+SPRY | 1116 | K256_RS17555         | Gammaproteobacteria | Alteromonadaceae bacterium 2052S.S.stab0a.01 | hypothetical protein [Alteromonadaceae bacterium 2052S.S.stab0a.01]. | GCF_003634075.1 |
| WP_149425237.1 | TM+TM→ Laminin_G_3+SPRY*→ Cluster358_2clades→?→?→ Phage_holin→?→?→  <-SRAP                                                                      | Laminin_G_3+SPRY                              | 714  | OTERR_RS06755        | Betaproteobacteria  | Oryzomicrobium terrae                        | hypothetical protein [Oryzomicrobium terrae].                        | GCF_008274805.1 |
| WP_151150764.1 | Phage_T7_tail→ SPRY*→ Phage_tail_APC→                                                                                                           | SPRY                                          | 494  | F8A88_RS08730        | Deltaproteobacteria | Desulfovibrio senegalensis                   | hypothetical protein [Desulfovibrio senegalensis].                   | GCF_008830225.1 |
| WP_152380319.1 | HTH_20→  <-ABhydrolase<-?  SIG+SPRY*→                                                                                                           | SIG+SPRY                                      | 377  | GCU48_RS13350        | Firmicutes          | Paenibacillus brasiliensis                   | hypothetical protein [Paenibacillus brasiliensis].                   | GCF_009363115.1 |
| WP_152906267.1 | Phage-tail-tape→ ConA-repeats→?→ SPRY+X*→?→ PSE→  <-?  REC+OmpR-HTH→                                                                            | SPRY+X                                        | 633  | ADI69_RS15035        | Gammaproteobacteria | Stenotrophomonas maltophilia                 | hypothetical protein [Stenotrophomonas maltophilia].                 | GCF_001073045.1 |
| WP_153164331.1 | Phage_connect_1→ Phage_H_T_join→ HK97-gp10_like→ DUF3168→ Phage_TTP_11→ Phage_TAC_13→?→ SPRY+X*→?→ Phage-tail-tape→?→?→?→  <-SRAP               | SPRY+X                                        | 656  | GDJ08_RS03810        | Gammaproteobacteria | Stenotrophomonas sp. CPCC 101271             | hypothetical protein [Stenotrophomonas sp. CPCC 101271].             | GCF_009467805.1 |

| acc            | operon                                                                                                                              | architecture | len | gen.name       | taxend              | species                           | define                                                                   | gca             |
|----------------|-------------------------------------------------------------------------------------------------------------------------------------|--------------|-----|----------------|---------------------|-----------------------------------|--------------------------------------------------------------------------|-----------------|
| WP_153794576.1 | SIG+SPRY*→                                                                                                                          | SIG+SPRY     | 333 | BJH92_RS10685  | Firmicutes          | Paenibacillus polymyxa            | hypothetical protein [Paenibacillus polymyxa].                           | GCF_009650715.1 |
| WP_154081143.1 | Phage_connect_1→ Phage_H_T_join→ HK97-gp10_like→ DUF3168→ Phage_TTP_11→ Phage_TAC_13→?→ SPRY+X*→?→?→ Phage-tail-tape→               | SPRY+X       | 655 | B861_RS0208195 | Gammaproteobacteria | Stenotrophomonas maltophilia      | hypothetical protein [Stenotrophomonas maltophilia].                     | GCF_000295735.1 |
| WP_154263126.1 | Phage-tail-tape→ ConA-repeats→?→ SPRY+X*→                                                                                           | SPRY+X       | 655 | FEO89_RS08390  | Gammaproteobacteria | Stenotrophomonas maltophilia      | hypothetical protein [Stenotrophomonas maltophilia].                     | GCF_009676565.1 |
| WP_154352257.1 | Phage_connect_1→ Phage_H_T_join→ HK97-gp10_like→ DUF3168→ Phage_TTP_11→ Phage_TAC_13→?→ SPRY+X*→?→?→ Phage-tail-tape→ ConA-repeats→ | SPRY+X       | 657 | FEO88_RS08425  | Gammaproteobacteria | Stenotrophomonas maltophilia      | hypothetical protein [Stenotrophomonas maltophilia].                     | GCF_009676585.1 |
| WP_154965920.1 | SIG+SPRY*→?→  <-?<-PSE<-PSE<-?<-?<-?<-Phage_holin                                                                                   | SIG+SPRY     | 346 | F1386_RS02215  | Firmicutes          | Paenibacillus azotifigens         | hypothetical protein [Paenibacillus azotifigens].                        | GCF_008635805.1 |
| WP_156830543.1 | Cluster180_2clades→?→?→?→?→?→?→ SPRY*→                                                                                              | SPRY         | 830 | METMA_RS27135  | Gammaproteobacteria | Methylobacter marinus             | hypothetical protein [Methylobacter marinus].                            | GCF_000383855.1 |
| WP_157628481.1 | Phage_connect_1→ Phage_H_T_join→ HK97-gp10_like→ DUF3168→ Phage_TTP_11→ Phage_TAC_13→?→ SPRY+X*→?→ Phage-tail-tape→                 | SPRY+X       | 657 | SMAL_RS12680   | Gammaproteobacteria | Stenotrophomonas maltophilia      | hypothetical protein [Stenotrophomonas maltophilia].                     | GCF_000020665.1 |
| WP_157793929.1 | SUN→ SPRY+SUN*→ SUN→ Laminin_G_3→ Disaggr_repeat→ Phage_holin_4_1→                                                                  | SPRY+SUN     | 409 | B9T62_RS19340  | Firmicutes          | Paenibacillus donghaensis         | discoidin domain-containing protein [Paenibacillus donghaensis].         | GCF_002192415.1 |
| WP_158702666.1 | SUN→ SPRY+SUN*→                                                                                                                     | SPRY+SUN     | 405 | C8268_RS03870  | Firmicutes          | Paenibacillus sp. Marseille-P3787 | discoidin domain-containing protein [Paenibacillus sp. Marseille-P3787]. | GCF_900289175.1 |
| WP_159054946.1 | OBfold→?→?→  <-?  ?→ ConA-repeats→?→ SPRY+X*→                                                                                       | SPRY+X       | 655 | C9J74_RS07540  | Gammaproteobacteria | Stenotrophomonas maltophilia      | hypothetical protein [Stenotrophomonas maltophilia].                     | GCF_003030985.1 |
| WP_160788604.1 | HTH_20→  <-PSE<-ABhydrolase<-Polbetant  ACET→ Cupin_2→ ABhydrolase→  <-DUF2935  SIG+SPRY*→?→ PSE→  <-Glycos_transf_2                | SIG+SPRY     | 338 | GRP75_RS03415  | Firmicutes          | Paenibacillus sp. OT2-17          | hypothetical protein [Paenibacillus sp. OT2-17].                         | GCF_009827695.1 |
| WP_161771818.1 | Phage_TAC_13→?→ SPRY+X*→?→?→ Phage-tail-tape→                                                                                       | SPRY+X       | 657 | AR275_RS25795  | Gammaproteobacteria | Stenotrophomonas maltophilia      | hypothetical protein [Stenotrophomonas maltophilia].                     | GCF_001506105.1 |
| WP_162174107.1 | Cluster165_3clades→?→?→ Cluster303_2clades→?→?→ TM+TM→ SPRY*→?→?→?→?→?→?→ SIG+HORMA→                                                | SPRY         | 125 | HMCN_RS19520   | Betaproteobacteria  | Hermiimonas sp. CN                | hypothetical protein [Hermiimonas sp. CN].                               | GCF_000622895.1 |
| WP_162407361.1 | Phage-tail-tape→?→?→ SUN→ SPRY+X*→?→  <-?  DAM→                                                                                     | SPRY+X       | 654 | CSC62_RS14285  | Gammaproteobacteria | Pseudoxanthomonas jiangsuensis    | hypothetical protein [Pseudoxanthomonas jiangsuensis].                   | GCF_010093185.1 |
| WP_162815241.1 | SPRY*→                                                                                                                              | SPRY         | 219 | DOU47_RS11710  | Actinobacteria      | Microbacterium arborescens        | hypothetical protein [Microbacterium arborescens].                       | GCF_003339645.1 |
| WP_163369807.1 | SPRY*→                                                                                                                              | SPRY         | 262 | G7B23_RS04230  | Gammaproteobacteria | Endozoicomonas acroporae          | hypothetical protein [Endozoicomonas acroporae].                         | GCF_010994325.1 |

| acc            | operon                                                                                                                                                 | architecture          | len | gen.name      | taxend              | species                       | define                                                           | gca             |
|----------------|--------------------------------------------------------------------------------------------------------------------------------------------------------|-----------------------|-----|---------------|---------------------|-------------------------------|------------------------------------------------------------------|-----------------|
| WP_163387923.1 | SPRY*→                                                                                                                                                 | SPRY                  | 262 | EO230_RS13880 | Gammaproteobacteria | Endozoicomonas acroporae      | hypothetical protein [Endozoicomonas acroporae].                 | GCF_010994335.1 |
| WP_163679668.1 | Laminin_G_3+SPRY+SPRY*→                                                                                                                                | Laminin_G_3+SPRY+SPRY | 704 | G4223_RS11800 | Alphaproteobacteria | Magnetospirillum aberrantis   | hypothetical protein [Magnetospirillum aberrantis].              | GCF_011022235.1 |
| WP_164136018.1 | Phage_H_T_join→ HK97-gp10_like→ DUF3168→?→ Phage_TTP_11→ Phage_TAC_13→?→ SPRY+X*→?→?→ Phage-tail-tape→ ConA-repeats→ ConA→                             | SPRY+X                | 657 | G4995_RS01655 | Gammaproteobacteria | Stenotrophomonas maltophilia  | hypothetical protein [Stenotrophomonas maltophilia].             | GCF_010604725.1 |
| WP_164170835.1 | Phage_connect_1→ Phage_H_T_join→ HK97-gp10_like→ DUF3168→ Phage_TTP_11→ Phage_TAC_13→?→ SPRY+X*→?→ Phage-tail-tape→ ConA-repeats→                      | SPRY+X                | 657 | G5A21_RS04165 | Gammaproteobacteria | Stenotrophomonas maltophilia  | hypothetical protein [Stenotrophomonas maltophilia].             | GCF_010605085.1 |
| WP_164171533.1 | Phage_connect_1→ Phage_H_T_join→ HK97-gp10_like→ DUF3168→ Phage_TTP_11→ Phage_TAC_13→?→ SPRY+X*→?→?→ Phage-tail-tape→ ConA-repeats→?→?→ SRAP→          | SPRY+X                | 657 | G5A20_RS11530 | Gammaproteobacteria | Stenotrophomonas maltophilia  | hypothetical protein [Stenotrophomonas maltophilia].             | GCF_010607635.1 |
| WP_164186354.1 | Phage_connect_1→ Phage_H_T_join→ HK97-gp10_like→ DUF3168→ Phage_TTP_11→ Phage_TAC_13→?→ SPRY+X*→?→?→ Phage-tail-tape→ ConA-repeats→?→?→ SRAP→          | SPRY+X                | 657 | G4996_RS10295 | Gammaproteobacteria | Stenotrophomonas maltophilia  | hypothetical protein [Stenotrophomonas maltophilia].             | GCF_010608865.1 |
| WP_164222458.1 | Phage_connect_1→ Phage_H_T_join→ HK97-gp10_like→ DUF3168→ Phage_TTP_11→ Phage_TAC_13→?→ SPRY+X*→  <?  ?→?→ Phage-tail-tape→ ConA-repeats→              | SPRY+X                | 658 | G5A44_RS14400 | Gammaproteobacteria | Stenotrophomonas maltophilia  | hypothetical protein [Stenotrophomonas maltophilia].             | GCF_010608905.1 |
| WP_164227274.1 | Phage_connect_1→ Phage_H_T_join→ HK97-gp10_like→ DUF3168→ Phage_TTP_11→ Phage_TAC_13→?→ SPRY+X*→?→ Phage-tail-tape→ ConA-repeats→?→?→  <-PSE  ?→ SRAP→ | SPRY+X                | 658 | G5A23_RS09720 | Gammaproteobacteria | Stenotrophomonas maltophilia  | hypothetical protein [Stenotrophomonas maltophilia].             | GCF_010605135.1 |
| WP_164262535.1 | Phage_connect_1→ Phage_H_T_join→ HK97-gp10_like→ DUF3168→ Phage_TTP_11→ Phage_TAC_13→?→ SPRY+X*→?→?→ Phage-tail-tape→ ConA-repeats→?→  <-SRAP          | SPRY+X                | 655 | G5A42_RS09935 | Gammaproteobacteria | Stenotrophomonas maltophilia  | hypothetical protein [Stenotrophomonas maltophilia].             | GCF_010609005.1 |
| WP_164272506.1 | Phage_connect_1→ Phage_H_T_join→ HK97-gp10_like→ DUF3168→ Phage_TTP_11→ Phage_TAC_13→?→ SPRY+X*→?→?→ Phage-tail-tape→ ConA-repeats→ ConA→?→  <-SRAP    | SPRY+X                | 657 | G4G00_RS08180 | Gammaproteobacteria | Stenotrophomonas sp. B1-1     | hypothetical protein [Stenotrophomonas sp. B1-1].                | GCF_010894375.1 |
| WP_164283369.1 | Phage_connect_1→ Phage_H_T_join→ HK97-gp10_like→ DUF3168→ Phage_TTP_11→ Phage_TAC_13→?→ SPRY+X*→?→ Phage-tail-tape→ ConA-repeats→ ConA→?→  <-SRAP      | SPRY+X                | 655 | GJV38_RS08100 | Gammaproteobacteria | Stenotrophomonas maltophilia  | hypothetical protein [Stenotrophomonas maltophilia].             | GCF_010994225.1 |
| WP_164687941.1 | Phage_connect_1→ Phage_H_T_join→ HK97-gp10_like→ DUF3168→ Phage_TTP_11→ Phage_TAC_13→?→ SPRY+X*→?→?→ Phage-tail-tape→ ConA-repeats→ ConA→?→  <-SRAP    | SPRY+X                | 655 | G5C63_RS04670 | Gammaproteobacteria | Stenotrophomonas pavanii      | hypothetical protein [Stenotrophomonas pavanii].                 | GCF_011043715.1 |
| WP_164776353.1 | SUN→ SPRY+SUN*→ SUN→ Laminin_G_3→ Disaggr_repeat→ Phage_holin_4_1→?→ SIG+ConA+beta-propeller→                                                          | SPRY+SUN              | 423 | FLT43_RS09110 | Firmicutes          | Paenibacillus thiaminolyticus | hypothetical protein [Paenibacillus thiaminolyticus].            | GCF_004001005.1 |
| WP_164965245.1 | HTH_20→  <-Trypsin<-ABhydrolase  ACET→  <-DUF2935<-?  SIG+SPRY*→                                                                                       | SIG+SPRY              | 369 | G9G57_RS16175 | Firmicutes          | Paenibacillus sp. EKM211P     | hypothetical protein [Paenibacillus sp. EKM211P].                | GCF_011066175.1 |
| WP_165083476.1 | HTH_20→  <-Trypsin<-ABhydrolase  ACET→  <-DUF2935<-?  SIG+SPRY*→                                                                                       | SIG+SPRY              | 312 | G9G64_RS19615 | Firmicutes          | unclassified Paenibacillus    | MULTISPECIES: hypothetical protein [unclassified Paenibacillus]. | GCF_011066085.1 |
| WP_165148029.1 | HTH_20→  <-ABhydrolase<-Polbetant  ACET→ Cupin_2→ ABhydrolase→  <-DUF2935  SIG+SPRY*→?→  <-Glycos_transf_2                                             | SIG+SPRY              | 345 | G9G52_RS14675 | Firmicutes          | unclassified Paenibacillus    | MULTISPECIES: hypothetical protein [unclassified Paenibacillus]. | GCF_011066155.1 |

| acc            | operon                                                                                                                                          | architecture     | len | gen.name      | taxend              | species                      | define                                                           | gca             |
|----------------|-------------------------------------------------------------------------------------------------------------------------------------------------|------------------|-----|---------------|---------------------|------------------------------|------------------------------------------------------------------|-----------------|
| WP_165178844.1 | HTH_20→  <-ABhydrolase<-Polbetant  ACET→ Cupin_2→  <-DUF2935  SIG+SPRY*→                                                                        | SIG+SPRY         | 330 | G9G54_RS16165 | Firmicutes          | Paenibacillus sp. EKM212P    | hypothetical protein [Paenibacillus sp. EKM212P].                | GCF_011066115.1 |
| WP_165980135.1 | SUN→ SUN→ SPRY+SUN*→ Laminin_G_3→ Disaggr_repeat→                                                                                               | SPRY+SUN         | 412 | E2R58_RS01745 | Firmicutes          | Paenibacillus amylolyticus   | hypothetical protein [Paenibacillus amylolyticus].               | GCF_004358835.1 |
| WP_167440979.1 | HTH_20→  <-Trypsin<-ABhydrolase  ACET→  <-DUF2935<-?  SIG+SPRY*→                                                                                | SIG+SPRY         | 332 | HFD99_RS19285 | Firmicutes          | Paenibacillus sp. EKM301P    | hypothetical protein [Paenibacillus sp. EKM301P].                | GCF_011800295.1 |
| WP_168180444.1 | SPRY+SUN*→ SUN→ SUN→ Laminin_G_3→ Disaggr_repeat→ Phage_holin_4_1→                                                                              | SPRY+SUN         | 417 | HRG14_RS16580 | Firmicutes          | Paenibacillus dendritiformis | hypothetical protein [Paenibacillus dendritiformis].             | GCF_012272915.1 |
| WP_168224778.1 | Phage-tail_3+FN3→ Cluster93_5clades→ Laminin_G_3+SPRY*→?→?→  <-?<-REC+OmpR-HTH                                                                  | Laminin_G_3+SPRY | 442 | EXZ61_RS14580 | Betaproteobacteria  | Rhodofera sediminis          | hypothetical protein [Rhodofera sediminis].                      | GCF_006974105.1 |
| WP_168759630.1 | Phage_H_T_join→ HK97-gp10_like→ DUF3168→?→ Phage_TTP_11→ Phage_TAC_13→?→ SPRY+X*→?→ Phage-tail-tape→ ConA-repeats→?→?→  <-PSE  ?→ SRAP→         | SPRY+X           | 655 | HGN30_RS14120 | Gammaproteobacteria | Stenotrophomonas maltophilia | hypothetical protein [Stenotrophomonas maltophilia].             | GCF_012647025.1 |
| WP_170142066.1 | Phage-tail_3→?→ SPRY*→?→?→?→?→?→ DAM→                                                                                                           | SPRY             | 223 | DFQ59_RS06730 | Gammaproteobacteria | Thioalbus denitrificans      | hypothetical protein [Thioalbus denitrificans].                  | GCF_003337735.1 |
| WP_171365214.1 | SUN→ SUN→?→ DISCOIDIN→ SUN→ SPRY+SUN*→ SUN→ Laminin_G_3→ Disaggr_repeat→?→?→ Phage_holin_1→                                                     | SPRY+SUN         | 425 | HL291_RS06145 | Firmicutes          | Lysinibacillus fusiformis    | discoidin domain-containing protein [Lysinibacillus fusiformis]. | GCF_013112215.1 |
| WP_180361703.1 | SUN→ SUN→ SUN→ SPRY+SUN*→ Laminin_G_3→ Disaggr_repeat→                                                                                          | SPRY+SUN         | 412 | CXK86_RS01005 | Firmicutes          | Paenibacillus sp. BGI2013    | hypothetical protein [Paenibacillus sp. BGI2013].                | GCF_002843485.1 |
| WP_180832871.1 | Phage_connect_1→ Phage_H_T_join→ HK97-gp10_like→ DUF3168→ Phage_TTP_11→ Phage_TAC_13→?→ SPRY+X*→?→?→ Phage-tail-tape→ ConA-repeats→?→?→  <-SRAP | SPRY+X           | 657 | D7U76_RS15765 | Gammaproteobacteria | Stenotrophomonas maltophilia | hypothetical protein [Stenotrophomonas maltophilia].             | GCF_013463655.1 |
| WP_180835450.1 | Phage_connect_1→ Phage_H_T_join→ HK97-gp10_like→ DUF3168→ Phage_TTP_11→ Phage_TAC_13→?→ SPRY+X*→?→?→ Phage-tail-tape→?→?→?→  <-PSE  ?→  <-SRAP  | SPRY+X           | 657 | D7U87_RS15230 | Gammaproteobacteria | Stenotrophomonas maltophilia | hypothetical protein [Stenotrophomonas maltophilia].             | GCF_013463795.1 |
| WP_180837803.1 | Phage-tail-tape→ ConA-repeats→?→ SPRY+X*→?→?→?→?→?→?→  <-Ribonuc_L-PSP                                                                          | SPRY+X           | 633 | D7Y22_RS10130 | Gammaproteobacteria | Stenotrophomonas maltophilia | hypothetical protein [Stenotrophomonas maltophilia].             | GCF_013463895.1 |
| WP_180844236.1 | Phage-tail-tape→ ConA-repeats→?→ SPRY+X*→?→?→?→?→ SIG+TM+TM+TM+TM+TM+TM+TM+TM→ ABC-ATPase→                                                      | SPRY+X           | 655 | D7Y24_RS02400 | Gammaproteobacteria | Stenotrophomonas maltophilia | hypothetical protein [Stenotrophomonas maltophilia].             | GCF_013463875.1 |
| WP_180874375.1 | Phage_connect_1→ Phage_H_T_join→ HK97-gp10_like→ DUF3168→ Phage_TTP_11→ Phage_TAC_13→?→ SPRY+X*→?→?→ Phage-tail-tape→ ConA-repeats→?→?→  <-SRAP | SPRY+X           | 657 | D7Y39_RS15850 | Gammaproteobacteria | Stenotrophomonas maltophilia | hypothetical protein [Stenotrophomonas maltophilia].             | GCF_013464195.1 |
| WP_180877176.1 | Phage_connect_1→ Phage_H_T_join→ HK97-gp10_like→ DUF3168→ Phage_TTP_11→ Phage_TAC_13→?→ SPRY+X*→?→?→ Phage-tail-tape→ ConA-repeats→?→?→  <-SRAP | SPRY+X           | 657 | D7U95_RS06530 | Gammaproteobacteria | Stenotrophomonas maltophilia | hypothetical protein [Stenotrophomonas maltophilia].             | GCF_013463605.1 |
| WP_180890353.1 | Phage_connect_1→ Phage_H_T_join→ HK97-gp10_like→ DUF3168→ Phage_TTP_11→ Phage_TAC_13→?→ SPRY+X*→?→?→ Phage-tail-tape→ ConA-repeats→?→?→  <-SRAP | SPRY+X           | 658 | D7Y45_RS11625 | Gammaproteobacteria | Stenotrophomonas maltophilia | hypothetical protein [Stenotrophomonas maltophilia].             | GCF_013464305.1 |
| WP_182068260.1 | Phage_connect_1→ Phage_H_T_join→ HK97-gp10_like→ DUF3168→ Phage_TTP_11→ Phage_TAC_13→?→ SPRY+X*→?→?→ Phage-tail-tape→ ConA-repeats→ ConA→       | SPRY+X           | 655 | H7A80_RS13755 | Gammaproteobacteria | Stenotrophomonas pavanii     | hypothetical protein [Stenotrophomonas pavanii].                 | GCF_903970895.1 |

| acc            | operon                                                                                                                                             | architecture | len | gen.name      | taxend              | species                        | define                                                 | gca             |
|----------------|----------------------------------------------------------------------------------------------------------------------------------------------------|--------------|-----|---------------|---------------------|--------------------------------|--------------------------------------------------------|-----------------|
| WP_182680994.1 | Phage_connect_1→ Phage_H_T_join→ HK97-gp10_like→ DUF3168→ Phage_TTP_11→ Phage_TAC_13→?→ SPRY+X*→?→?→<br>Phage-tail-tape→ ConA-repeats→?→?→  <-SRAP | SPRY+X       | 657 | H4O10_RS07755 | Gammaproteobacteria | Stenotrophomonas sp. I18B00994 | hypothetical protein [Stenotrophomonas sp. I18B00994]. | GCF_014145825.1 |
| WP_182852413.1 | Cluster242_2clades→?→ PSE→?→ SPRY*→                                                                                                                | SPRY         | 255 | H7K70_RS11535 | Gammaproteobacteria | Pseudomonas otitidis           | hypothetical protein [Pseudomonas otitidis].           | GCF_014161995.1 |
| WP_183080221.1 | Phage_connect_1→ Phage_H_T_join→ HK97-gp10_like→ DUF3168→ Phage_TTP_11→ Phage_TAC_13→?→ SPRY+X*→?→?→<br>Phage-tail-tape→ ConA-repeats→?→?→ SRAP→   | SPRY+X       | 657 | C7543_RS14050 | Gammaproteobacteria | Stenotrophomonas sp. CF319     | hypothetical protein [Stenotrophomonas sp. CF319].     | GCF_003633905.1 |

Gene neighborhoods and domain architectures of TPR-GREAB-C-PIN systems

| acc        | operon                                                               | architecture          | len  | gen.name       | taxend              | species                                        | define                                                                                | gca             |
|------------|----------------------------------------------------------------------|-----------------------|------|----------------|---------------------|------------------------------------------------|---------------------------------------------------------------------------------------|-----------------|
| -          | -                                                                    | -                     | NA   | NA             | NA                  | NA                                             | NA                                                                                    | GCF_016236915.1 |
| AAQ66293.1 | TPR+GreAB-C+PIN*→                                                    | TPR+GreAB-C+PIN       | 1140 | PG_1202        | Bacteroidetes       | Porphyromonas gingivalis W83                   | hypothetical protein PG_1202 [Porphyromonas gingivalis W83].                          | GCA_000007585.1 |
| ABA73572.1 | REase+TPR+GreAB-C+PIN*→                                              | REase+TPR+GreAB-C+PIN | 1113 | Pf01_1829      | Gammaproteobacteria | Pseudomonas fluorescens Pf0-1                  | hypothetical protein Pf01_1829 [Pseudomonas fluorescens Pf0-1].                       | GCA_000012445.1 |
| ABP70317.1 | TPR+GreAB-C+PIN*→                                                    | TPR+GreAB-C+PIN       | 1188 | Rsph17025_1421 | Alphaproteobacteria | Rhodobacter sphaeroides ATCC 17025             | hypothetical protein Rsph17025_1421 [Rhodobacter sphaeroides ATCC 17025].             | GCA_000016405.1 |
| ACB93983.1 | TPR+GreAB-C+PIN*→                                                    | TPR+GreAB-C+PIN       | 1100 | Bind_0329      | Alphaproteobacteria | Beijerinckia indica subsp. indica ATCC 9039    | Tetratricopeptide TPR_2 repeat protein [Beijerinckia indica subsp. indica ATCC 9039]. | GCA_000019845.1 |
| ACQ93407.1 | HetE-N1→ TPR+GreAB-C+PIN*→                                           | TPR+GreAB-C+PIN       | 1069 | Tola_1798      | Gammaproteobacteria | Tolomonas auensis DSM 9187                     | hypothetical protein Tola_1798 [Tolomonas auensis DSM 9187].                          | GCA_000023065.1 |
| ADX44119.1 | REase+TPR+GreAB-C+PIN*→                                              | REase+TPR+GreAB-C+PIN | 1383 | Acav_0193      | Betaproteobacteria  | Acidovorax avenae subsp. avenae ATCC 19860     | hypothetical protein Acav_0193 [Acidovorax avenae subsp. avenae ATCC 19860].          | GCA_000176855.2 |
| AFD27801.1 | TPR+GreAB-C+PIN*→                                                    | TPR+GreAB-C+PIN       | 1286 | DGo_PC0009     | Deinococci          | Deinococcus gobiensis I-0                      | hypothetical protein DGo_PC0009 (plasmid) [Deinococcus gobiensis I-0].                | GCA_000252445.1 |
| AFJ56694.1 | REase+TPR+GreAB-C+PIN*→                                              | REase+TPR+GreAB-C+PIN | 1321 | PfIA506_2672   | Gammaproteobacteria | Pseudomonas fluorescens A506                   | tetratricopeptide repeat protein [Pseudomonas fluorescens A506].                      | GCA_000262325.2 |
| AGO88322.1 | REase+TPR+GreAB-C+PIN*→?→?→ Calcineurin→ Calcineurin→?→ Calcineurin→ | REase+TPR+GreAB-C+PIN | 1344 | MOC_1p0084     | Alphaproteobacteria | Methylobacterium oryzae CBMB20                 | Tetratricopeptide TPR_2 repeat protein (plasmid) [Methylobacterium oryzae CBMB20].    | -               |
| AHC85672.1 | HetE-N1→ TPR+TPR+GreAB-C+PIN*→                                       | TPR+TPR+GreAB-C+PIN   | 1114 | X969_07375     | Gammaproteobacteria | Pseudomonas monteilii SB3078                   | hypothetical protein X969_07375 [Pseudomonas monteilii SB3078].                       | GCA_000510285.1 |
| AHG89833.1 | TPR+GreAB-C+PIN*→                                                    | TPR+GreAB-C+PIN       | 1325 | J421_2296      | Gemmatimonadetes    | Gemmatirosa kalamazoonesis                     | hypothetical protein J421_2296 [Gemmatirosa kalamazoonesis].                          | GCA_000522985.1 |
| AHZ68657.1 | REase+TPR+GreAB-C+PIN*→                                              | REase+TPR+GreAB-C+PIN | 1527 | OU5_1578       | Gammaproteobacteria | Pseudomonas mandelii JR-1                      | hypothetical protein OU5_1578 [Pseudomonas mandelii JR-1].                            | GCA_000257545.3 |
| AIO22452.1 | REase+TPR+GreAB-C+PIN*→                                              | REase+TPR+GreAB-C+PIN | 1474 | DM41_7691      | Betaproteobacteria  | Burkholderia cepacia ATCC 25416                | tetratricopeptide repeat family protein (plasmid) [Burkholderia cepacia ATCC 25416].  | GCA_003546465.1 |
| AJG23424.1 | REase+TPR+GreAB-C+PIN*→                                              | REase+TPR+GreAB-C+PIN | 1348 | RR42_s1836     | Betaproteobacteria  | Cupriavidus basilensis                         | hypothetical protein RR42_s1836 [Cupriavidus basilensis].                             | GCA_000832305.1 |
| AJG25013.1 | NACHT→ REase+TPR+GreAB-C+PIN*→                                       | REase+TPR+GreAB-C+PIN | 1361 | RR42_s3437     | Betaproteobacteria  | Cupriavidus basilensis                         | hypothetical protein RR42_s3437 [Cupriavidus basilensis].                             | GCA_000832305.1 |
| ALA80840.1 | TPR+GreAB-C+PIN*→                                                    | TPR+GreAB-C+PIN       | 706  | VN11_01310     | Gammaproteobacteria | Stenotrophomonas maltophilia                   | hypothetical protein VN11_01310 [Stenotrophomonas maltophilia].                       | GCA_001274595.1 |
| ALK23663.1 | REase+TPR+GreAB-C+PIN*→                                              | REase+TPR+GreAB-C+PIN | 1346 | APZ15_37705    | Betaproteobacteria  | Burkholderia cepacia ATCC 25416                | hypothetical protein APZ15_37705 (plasmid) [Burkholderia cepacia ATCC 25416].         | GCA_001411495.1 |
| ALY84300.1 | TPR+GreAB-C+PIN*→                                                    | TPR+GreAB-C+PIN       | 808  | HV95_15440     | Gammaproteobacteria | Pseudomonas aeruginosa                         | hypothetical protein HV95_15440 [Pseudomonas aeruginosa].                             | GCA_001516225.1 |
| AMM82949.1 | HetE-N1→ TPR+GreAB-C+PIN*→                                           | TPR+GreAB-C+PIN       | 1090 | AW43_10865     | Gammaproteobacteria | Pasteurella multocida subsp. multocida PMTB2.1 | hypothetical protein AW43_10865 [Pasteurella multocida subsp. multocida PMTB2.1].     | GCA_001578435.2 |
| ANP41882.1 | REase+TPR+GreAB-C+PIN*→                                              | REase+TPR+GreAB-C+PIN | 1247 | K529_013985    | Alphaproteobacteria | Epibacterium mobile F1926                      | hypothetical protein K529_013985 [Epibacterium mobile F1926].                         | GCA_000376545.2 |
| AOE80004.1 | TPR+GreAB-C+PIN*→                                                    | TPR+GreAB-C+PIN       | 962  | A7318_15795    | Gammaproteobacteria | Pseudomonas lurida                             | hypothetical protein A7318_15795 [Pseudomonas lurida].                                | GCA_001708485.1 |



| acc          | operon                                                               | architecture                    | len  | gen.name               | taxend                | species                                               | define                                                                                    | gca             |
|--------------|----------------------------------------------------------------------|---------------------------------|------|------------------------|-----------------------|-------------------------------------------------------|-------------------------------------------------------------------------------------------|-----------------|
| APP29939.1   | REase+TPR+GreAB-C+PIN*→   <-?  HTH→                                  | REase+TPR+GreAB-C+PIN           | 1216 | AUO97_03535            | Gammaproteobacteria   | Acinetobacter baumannii                               | hypothetical protein AUO97_03535 [Acinetobacter baumannii].                               | GCA_001593425.2 |
| APT35017.1   | REase+TPR+GreAB-C+PIN*→?→?→ Calcineurin→ Calcineurin→?→ Calcineurin→ | REase+TPR+GreAB-C+PIN           | 1340 | MCBMB27_05726          | Alphaproteobacteria   | Methylobacterium phyllosphaerae                       | hypothetical protein MCBMB27_05726 (plasmid) [Methylobacterium phyllosphaerae].           | GCA_001936175.1 |
| APV35618.1   | REase+TPR+GreAB-C+PIN*→                                              | REase+TPR+GreAB-C+PIN           | 1211 | BEN76_06135            | Gammaproteobacteria   | Acinetobacter soli                                    | hypothetical protein BEN76_06135 [Acinetobacter soli].                                    | GCA_001953195.1 |
| ARP63802.1   | REase+TPR+GreAB-C+PIN*→                                              | REase+TPR+GreAB-C+PIN           | 1328 | A9K65_010750           | Alphaproteobacteria   | Mesorhizobium sp. WSM1497                             | hypothetical protein A9K65_010750 [Mesorhizobium sp. WSM1497].                            | GCA_001672455.2 |
| ARS41908.1   | TPR+GreAB-C+PIN*→                                                    | TPR+GreAB-C+PIN                 | 1265 | CA265_20515            | Bacteroidetes         | Sphingobacteriaceae bacterium GW460-11-11-14-LB5      | hypothetical protein CA265_20515 [Sphingobacteriaceae bacterium GW460-11-11-14-LB5].      | GCA_002151545.1 |
| AWD09427.1   | HetE-N1→?→ TPR+GreAB-C+PIN*→                                         | TPR+GreAB-C+PIN                 | 512  | C7D56_14785            | Gammaproteobacteria   | Salmonella enterica subsp. enterica serovar Corvallis | hypothetical protein C7D56_14785 [Salmonella enterica subsp. enterica serovar Corvallis]. | GCA_003071545.1 |
| AXQ72363.1   | HetE-N1→ TPR+GreAB-C+PIN*→                                           | TPR+GreAB-C+PIN                 | 1090 | AWY89_05050            | Gammaproteobacteria   | Pasteurella multocida subsp. multocida                | hypothetical protein AWY89_05050 [Pasteurella multocida subsp. multocida].                | GCA_003428945.1 |
| AXW62973.1   | REase+TPR+GreAB-C+PIN*→                                              | REase+TPR+GreAB-C+PIN           | 1325 | CJO94_14695            | Betaproteobacteria    | Ralstonia solanacearum                                | hypothetical protein CJO94_14695 [Ralstonia solanacearum].                                | GCA_003515385.1 |
| AYG03885.1   | X+PIN*→                                                              | X+PIN                           | 1170 | D7I44_10295            | Actinobacteria        | Gryllotalpica protaetiae                              | hypothetical protein D7I44_10295 [Gryllotalpica protaetiae].                              | GCA_003627055.1 |
| BAE85210.1   | REase+TPR+GreAB-C+PIN*→                                              | REase+TPR+GreAB-C+PIN           | 1306 | DSY3421                | Firmicutes            | Desulfotobacterium hafniense Y51                      | hypothetical protein DSY3421 [Desulfotobacterium hafniense Y51].                          | GCA_000010045.1 |
| BBD03377.1   | REase+TPR→ TPR→ TPR+GreAB-C+PIN*→                                    | TPR+GreAB-C+PIN                 | 656  | YGS_C2P1391            | Alphaproteobacteria   | Sphingobium sp. YG1                                   | hypothetical protein YGS_C2P1391 [Sphingobium sp. YG1].                                   | GCA_003609795.1 |
| BBZ79150.1   | TPR+PIN*→                                                            | TPR+PIN                         | 1186 | MANY_44870             | Actinobacteria        | Mycolicibacterium anyangense                          | hypothetical protein MANY_44870 [Mycolicibacterium anyangense].                           | GCA_010731855.1 |
| BBZ91069.1   | PIN*→                                                                | PIN                             | 190  | F07S3_09020            | Alphaproteobacteria   | Bradyrhizobium diazoefficiens                         | hypothetical protein F07S3_09020 [Bradyrhizobium diazoefficiens].                         | GCA_014163475.1 |
| CAA9240899.1 | TPR+GreAB-C+PIN*→                                                    | TPR+GreAB-C+PIN                 | 1079 | AVDCRST_MAG77-1676     | environmental samples | uncultured Chloroflexi bacterium                      | MAG: hypothetical protein AVDCRST_MAG77-1676 [uncultured Chloroflexi bacterium].          | GCA_902805635.1 |
| CAB3809090.1 | PIN*→                                                                | PIN                             | 270  | LMG28138_06082         | Betaproteobacteria    | Pararobbsia alpina                                    | hypothetical protein LMG28138_06082 [Pararobbsia alpina].                                 | GCA_902859895.1 |
| CAC9458388.1 | TPR+GreAB-C+PIN*→?→   <-PSE  PSE→ PSE→?→ PSE→ PSE→ PSE→?→?→ TPR→     | TPR+GreAB-C+PIN                 | 1164 | SMARSOXL104_LO-CUS2140 | environmental samples | uncultured Gammaproteobacteria bacterium              | hypothetical protein [uncultured Gammaproteobacteria bacterium].                          | GCA_903813475.1 |
| CAC9474194.1 | TPR+GreAB-C+PIN*→                                                    | TPR+GreAB-C+PIN                 | 1164 | SMARSOXL102_LO-CUS3344 | environmental samples | uncultured Gammaproteobacteria bacterium              | hypothetical protein [uncultured Gammaproteobacteria bacterium].                          | GCA_903813445.1 |
| CAC9479061.1 | TPR+GreAB-C+PIN*→                                                    | TPR+GreAB-C+PIN                 | 677  | SMARSOXL51_LO-CUS3828  | environmental samples | uncultured Gammaproteobacteria bacterium              | hypothetical protein [uncultured Gammaproteobacteria bacterium].                          | GCA_903813485.1 |
| CAD79080.1   | TRD+TRD→?→?→ REase+SNF2→?→ TM+TM+TPR+GreAB-C+PIN*→                   | TM+TM+TPR+GreAB-C+PIN           | 1274 | RB11367                | Planctomycetes        | Rhodopirellula baltica SH 1                           | hypothetical protein RB11367 [Rhodopirellula baltica SH 1].                               | GCA_000196115.1 |
| CAE7733776.1 | IMS+HHH+GreAB+AraC-HTH+AraC-HTH*→                                    | IMS+HHH+GreAB+AraC-HTH+AraC-HTH | 771  | dinB                   | Alveolata             | Symbiodinium microadriaticum                          | dinB [Symbiodinium microadriaticum].                                                      | GCA_905231925.1 |
| CAG37728.1   | HetE-N1→ TPR+GreAB-C+PIN*→                                           | TPR+GreAB-C+PIN                 | 1114 | DP2999                 | Deltaproteobacteria   | Desulfotalea psychrophila LSv54                       | unknown protein [Desulfotalea psychrophila LSv54].                                        | GCA_000025945.1 |
| CCD86698.1   | REase+TPR+TPR+GreAB-C+PIN*→                                          | REase+TPR+TPR+GreAB-C+PIN       | 1326 | BRAO285_2000017        | Alphaproteobacteria   | Bradyrhizobium sp. ORS 285                            | conserved hypothetical protein [Bradyrhizobium sp. ORS 285].                              | GCA_000239755.2 |
| CDF45779.1   | X+PIN*→?→?→ CITB-HTH+LexA-protease→                                  | X+PIN                           | 1212 | BN450_02242            | environmental samples | Roseburia sp. CAG:100                                 | uncharacterized protein BN450_02242 [Roseburia sp. CAG:100].                              | GCA_000436955.1 |
| CDH20863.1   | HetE-N1→ TPR+GreAB-C+PIN*→ TPR+GreAB-C+PIN→                          | TPR+GreAB-C+PIN                 | 846  | XBKQ1_2810009          | Gammaproteobacteria   | Xenorhabdus bovienii str. kraussei Quebec             | conserved hypothetical protein [Xenorhabdus bovienii str. kraussei Quebec].               | GCA_000736555.1 |
| CEL29322.1   | REase+TPR+GreAB-C+PIN*→                                              | REase+TPR+GreAB-C+PIN           | 1486 | SRM1_02673             | Gammaproteobacteria   | Pseudomonas fluorescens                               | hypothetical protein SRM1_02673 [Pseudomonas fluorescens].                                | GCA_000827755.2 |

| acc          | operon                                   | architecture          | len  | gen.name        | taxend              | species                                               | define                                                                                             | gca             |
|--------------|------------------------------------------|-----------------------|------|-----------------|---------------------|-------------------------------------------------------|----------------------------------------------------------------------------------------------------|-----------------|
| CFK79862.1   | REase+TPR+GreAB-C+PIN*→                  | REase+TPR+GreAB-C+PIN | 1327 | ERS012324_00072 | Betaproteobacteria  | Burkholderia pseudomallei                             | Uncharacterised protein [Burkholderia pseudomallei].                                               | GCA_001327015.1 |
| CGG41859.1   | TPR+GreAB-C+PIN*→                        | TPR+GreAB-C+PIN       | 1147 | ERS020510_00033 | Firmicutes          | Streptococcus pneumoniae                              | putative PEP-CTERM system TPR-repeat lipoprotein [Streptococcus pneumoniae].                       | GCA_001339955.1 |
| CNG28227.1   | HetE-N1→ TPR+GreAB-C+PIN*→               | TPR+GreAB-C+PIN       | 1094 | ERS137937_00749 | Gammaproteobacteria | Yersinia enterocolitica                               | Uncharacterised protein [Yersinia enterocolitica].                                                 | GCA_001160345.1 |
| COE44409.1   | TPR+GreAB-C+PIN*→                        | TPR+GreAB-C+PIN       | 1147 | ERS020529_01064 | Firmicutes          | Streptococcus pneumoniae                              | putative PEP-CTERM system TPR-repeat lipoprotein [Streptococcus pneumoniae].                       | GCA_002889635.1 |
| CRI57148.1   | REase+TPR+GreAB-C+PIN*→                  | REase+TPR+GreAB-C+PIN | 1419 | CCOS191_2612    | Gammaproteobacteria | Pseudomonas sp. CCOS 191                              | hypothetical protein CCOS191_2612 [Pseudomonas sp. CCOS 191].                                      | GCA_001007005.1 |
| CTR52279.1   | HetE-N1→ TPR+GreAB-C+PIN*→               | TPR+GreAB-C+PIN       | 1093 | ERS085432_03851 | Gammaproteobacteria | Escherichia coli                                      | Uncharacterised protein [Escherichia coli].                                                        | GCA_001277455.1 |
| CTU76757.1   | HetE-N1→ TPR+GreAB-C+PIN*→               | TPR+GreAB-C+PIN       | 1093 | ERS085409_04356 | Gammaproteobacteria | Escherichia coli                                      | Uncharacterised protein [Escherichia coli].                                                        | GCA_001284445.1 |
| EAA6823230.1 | HetE-N1→ TPR+GreAB-C+PIN*→               | TPR+GreAB-C+PIN       | 839  | DRV62_14440     | Gammaproteobacteria | Salmonella enterica subsp. enterica serovar Corvallis | hypothetical protein DRV62_14440, partial [Salmonella enterica subsp. enterica serovar Corvallis]. | GCA_004191475.1 |
| EAA7528536.1 | HetE-N1→ TPR+GreAB-C+PIN*→               | TPR+GreAB-C+PIN       | 997  | WB97_04605      | Gammaproteobacteria | Salmonella enterica subsp. enterica                   | hypothetical protein WB97_04605, partial [Salmonella enterica subsp. enterica].                    | GCA_004218105.1 |
| EAB9718450.1 | HetE-N1→ TPR+GreAB-C+PIN*→               | TPR+GreAB-C+PIN       | 1094 | EBD60_05220     | Gammaproteobacteria | Escherichia coli                                      | hypothetical protein EBD60_05220 [Escherichia coli].                                               | GCA_004268345.1 |
| EAC0684623.1 | HetE-N1→ TPR+GreAB-C+PIN*→               | TPR+GreAB-C+PIN       | 1117 | ECA66_22430     | Gammaproteobacteria | Salmonella enterica subsp. enterica serovar Molade    | hypothetical protein ECA66_22430 [Salmonella enterica subsp. enterica serovar Molade].             | GCA_004273605.1 |
| EAM8584006.1 | HetE-N1→ TPR+GreAB-C+PIN*→?→   <-Trypsin | TPR+GreAB-C+PIN       | 1121 | BET14_04310     | Gammaproteobacteria | Salmonella enterica                                   | hypothetical protein BET14_04310 [Salmonella enterica].                                            | GCA_005437065.1 |
| EAM9325916.1 | HetE-N1→ TPR+GreAB-C+PIN*→               | TPR+GreAB-C+PIN       | 1106 | DPR23_14355     | Gammaproteobacteria | Salmonella enterica                                   | hypothetical protein DPR23_14355 [Salmonella enterica].                                            | GCA_005440115.1 |
| EAN1748525.1 | HetE-N1→ TPR+GreAB-C+PIN*→               | TPR+GreAB-C+PIN       | 1107 | D8T88_07580     | Gammaproteobacteria | Salmonella enterica                                   | hypothetical protein D8T88_07580 [Salmonella enterica].                                            | GCA_005450625.1 |
| EAO3021897.1 | HetE-N1→ TPR+GreAB-C+PIN*→               | TPR+GreAB-C+PIN       | 727  | E3A68_19440     | Gammaproteobacteria | Salmonella enterica                                   | hypothetical protein E3A68_19440, partial [Salmonella enterica].                                   | GCA_005498265.1 |
| EAO5192492.1 | HetE-N1→ TPR+GreAB-C+PIN*→               | TPR+GreAB-C+PIN       | 867  | E7928_13885     | Gammaproteobacteria | Salmonella enterica                                   | hypothetical protein E7928_13885, partial [Salmonella enterica].                                   | GCA_005509025.1 |
| EAO9608739.1 | HetE-N1→ TPR+GreAB-C+PIN*→               | TPR+GreAB-C+PIN       | 776  | BH019_23310     | Gammaproteobacteria | Salmonella enterica                                   | hypothetical protein BH019_23310, partial [Salmonella enterica].                                   | GCA_005533575.1 |
| EAR5961962.1 | HetE-N1→ TPR+GreAB-C+PIN*→               | TPR+GreAB-C+PIN       | 1101 | ES925_14455     | Gammaproteobacteria | Salmonella enterica                                   | hypothetical protein ES925_14455 [Salmonella enterica].                                            | GCA_005654255.1 |
| EAR6368406.1 | HetE-N1→ TPR+GreAB-C+PIN*→               | TPR+GreAB-C+PIN       | 1117 | EU234_19825     | Gammaproteobacteria | Salmonella enterica                                   | hypothetical protein EU234_19825 [Salmonella enterica].                                            | GCA_005655905.1 |
| EAS2553591.1 | TPR+GreAB-C+PIN*→                        | TPR+GreAB-C+PIN       | 590  | DMT50_24325     | Gammaproteobacteria | Salmonella enterica                                   | hypothetical protein DMT50_24325, partial [Salmonella enterica].                                   | GCA_005679955.1 |
| EAS5437941.1 | TPR+GreAB-C+PIN*→                        | TPR+GreAB-C+PIN       | 985  | D8Z11_24970     | Gammaproteobacteria | Salmonella enterica                                   | hypothetical protein D8Z11_24970 [Salmonella enterica].                                            | GCA_005692135.1 |
| EAT5893226.1 | HetE-N1→ TPR+GreAB-C+PIN*→               | TPR+GreAB-C+PIN       | 1106 | E3L72_21800     | Gammaproteobacteria | Salmonella enterica                                   | hypothetical protein E3L72_21800 [Salmonella enterica].                                            | GCA_005737135.1 |
| EAT6283696.1 | HetE-N1→ TPR+GreAB-C+PIN*→               | TPR+GreAB-C+PIN       | 843  | E5797_05930     | Gammaproteobacteria | Salmonella enterica                                   | hypothetical protein E5797_05930, partial [Salmonella enterica].                                   | GCA_005739275.1 |
| EAV44914.1   | REase+TPR+GreAB-C+PIN*→                  | REase+TPR+GreAB-C+PIN | 1295 | SIAM614_12903   | Alphaproteobacteria | Labrenzia aggregata IAM 12614                         | hypothetical protein SIAM614_12903 [Labrenzia aggregata IAM 12614].                                | GCA_000168975.1 |
| EAW0681535.1 | HetE-N1→ TPR+GreAB-C+PIN+TM+TM*→         | TPR+GreAB-C+PIN+TM+TM | 1106 | AIB54_02885     | Gammaproteobacteria | Salmonella enterica                                   | hypothetical protein AIB54_02885 [Salmonella enterica].                                            | GCA_005896365.1 |
| EAW0902300.1 | TPR+GreAB-C+PIN*→                        | TPR+GreAB-C+PIN       | 638  | B2H02_24145     | Gammaproteobacteria | Salmonella enterica                                   | hypothetical protein B2H02_24145, partial [Salmonella enterica].                                   | GCA_005898285.1 |
| EAY5481430.1 | HetE-N1→ TPR+GreAB-C+PIN*→               | TPR+GreAB-C+PIN       | 858  | MB58_12360      | Gammaproteobacteria | Salmonella enterica                                   | hypothetical protein MB58_12360, partial [Salmonella enterica].                                    | GCA_006012385.1 |

| acc          | operon                                   | architecture    | len  | gen.name    | taxend              | species                                               | define                                                                                             | gca             |
|--------------|------------------------------------------|-----------------|------|-------------|---------------------|-------------------------------------------------------|----------------------------------------------------------------------------------------------------|-----------------|
| EBD0849223.1 | HetE-N1→ TPR+GreAB-C+PIN*→               | TPR+GreAB-C+PIN | 970  | FHN97_07895 | Gammaproteobacteria | Salmonella enterica                                   | hypothetical protein FHN97_07895, partial [Salmonella enterica].                                   | GCA_006217605.1 |
| EBD3738487.1 | HetE-N1→ TPR+GreAB-C+PIN*→               | TPR+GreAB-C+PIN | 1107 | CRZ11_10865 | Gammaproteobacteria | Salmonella enterica                                   | hypothetical protein CRZ11_10865 [Salmonella enterica].                                            | GCA_006248335.1 |
| EBD8181391.1 | TPR+GreAB-C+PIN*→                        | TPR+GreAB-C+PIN | 606  | C6600_23545 | Gammaproteobacteria | Salmonella enterica                                   | hypothetical protein C6600_23545 [Salmonella enterica].                                            | GCA_006268595.1 |
| EBF2432475.1 | HetE-N1→ TPR+GreAB-C+PIN*→               | TPR+GreAB-C+PIN | 986  | DKG18_08085 | Gammaproteobacteria | Salmonella enterica                                   | hypothetical protein DKG18_08085, partial [Salmonella enterica].                                   | GCA_006332345.1 |
| EBF2786917.1 | TPR+GreAB-C+PIN*→                        | TPR+GreAB-C+PIN | 738  | C2240_24885 | Gammaproteobacteria | Salmonella enterica subsp. enterica serovar Corvallis | hypothetical protein C2240_24885, partial [Salmonella enterica subsp. enterica serovar Corvallis]. | GCA_006331745.1 |
| EBF4219990.1 | HetE-N1→ TPR+GreAB-C+PIN*→               | TPR+GreAB-C+PIN | 702  | FH403_17525 | Gammaproteobacteria | Salmonella enterica                                   | hypothetical protein FH403_17525, partial [Salmonella enterica].                                   | GCA_006342775.1 |
| EBG7115752.1 | HetE-N1→ TPR+GreAB-C+PIN*→               | TPR+GreAB-C+PIN | 822  | FJA42_18775 | Gammaproteobacteria | Salmonella enterica                                   | hypothetical protein FJA42_18775, partial [Salmonella enterica].                                   | GCA_006457615.1 |
| EBI5135933.1 | TPR+GreAB-C+PIN*→                        | TPR+GreAB-C+PIN | 642  | DQO15_25245 | Gammaproteobacteria | Salmonella enterica                                   | hypothetical protein DQO15_25245, partial [Salmonella enterica].                                   | GCA_006559185.1 |
| EBI9233829.1 | HetE-N1→ TPR+GreAB-C+PIN*→               | TPR+GreAB-C+PIN | 670  | DLA64_23180 | Gammaproteobacteria | Salmonella enterica                                   | hypothetical protein DLA64_23180, partial [Salmonella enterica].                                   | GCA_006576485.1 |
| EBI9496533.1 | TPR+GreAB-C+PIN*→                        | TPR+GreAB-C+PIN | 749  | DLP94_24755 | Gammaproteobacteria | Salmonella enterica                                   | hypothetical protein DLP94_24755, partial [Salmonella enterica].                                   | GCA_006578745.1 |
| EBK5150964.1 | HetE-N1→ TPR+GreAB-C+PIN*→               | TPR+GreAB-C+PIN | 786  | DON25_22080 | Gammaproteobacteria | Salmonella enterica                                   | hypothetical protein DON25_22080, partial [Salmonella enterica].                                   | GCA_006645025.1 |
| EBL0898297.1 | HetE-N1→ TPR+GreAB-C+PIN*→?→   <-Trypsin | TPR+GreAB-C+PIN | 1121 | D0R07_07295 | Gammaproteobacteria | Salmonella enterica                                   | hypothetical protein D0R07_07295 [Salmonella enterica].                                            | GCA_006670825.1 |
| EBM3541219.1 | HetE-N1→ TPR+GreAB-C+PIN*→               | TPR+GreAB-C+PIN | 1117 | DYJ09_14310 | Gammaproteobacteria | Salmonella enterica                                   | hypothetical protein DYJ09_14310 [Salmonella enterica].                                            | GCA_006729905.1 |
| EBM4506587.1 | TPR+GreAB-C+PIN*→                        | TPR+GreAB-C+PIN | 652  | DZ654_25740 | Gammaproteobacteria | Salmonella enterica                                   | hypothetical protein DZ654_25740, partial [Salmonella enterica].                                   | GCA_006730405.1 |
| EBM4858227.1 | TPR+GreAB-C+PIN*→                        | TPR+GreAB-C+PIN | 648  | D0R05_25725 | Gammaproteobacteria | Salmonella enterica                                   | hypothetical protein D0R05_25725, partial [Salmonella enterica].                                   | GCA_006733825.1 |
| EBM6537845.1 | HetE-N1→ TPR+GreAB-C+PIN*→               | TPR+GreAB-C+PIN | 1028 | D2U20_21570 | Gammaproteobacteria | Salmonella enterica                                   | hypothetical protein D2U20_21570, partial [Salmonella enterica].                                   | GCA_006740525.1 |
| EBO1039185.1 | TPR+GreAB-C+PIN*→                        | TPR+GreAB-C+PIN | 643  | D3T71_25030 | Gammaproteobacteria | Salmonella enterica                                   | hypothetical protein D3T71_25030, partial [Salmonella enterica].                                   | GCA_006805285.1 |
| EBQ9134585.1 | TPR+GreAB-C+PIN*→                        | TPR+GreAB-C+PIN | 707  | DK746_24010 | Gammaproteobacteria | Salmonella enterica subsp. enterica serovar Corvallis | hypothetical protein DK746_24010, partial [Salmonella enterica subsp. enterica serovar Corvallis]. | GCA_006932075.1 |
| EBR0236973.1 | TPR+GreAB-C+PIN*→                        | TPR+GreAB-C+PIN | 757  | DNV25_24155 | Gammaproteobacteria | Salmonella enterica subsp. enterica serovar Corvallis | hypothetical protein DNV25_24155, partial [Salmonella enterica subsp. enterica serovar Corvallis]. | GCA_006936135.1 |
| EBS1151706.1 | TPR+GreAB-C+PIN*→                        | TPR+GreAB-C+PIN | 1007 | D6P66_23730 | Gammaproteobacteria | Salmonella enterica subsp. enterica serovar Corvallis | hypothetical protein D6P66_23730 [Salmonella enterica subsp. enterica serovar Corvallis].          | GCA_006989745.1 |
| EBS2228649.1 | TPR+GreAB-C+PIN*→                        | TPR+GreAB-C+PIN | 684  | DRL12_24325 | Gammaproteobacteria | Salmonella enterica subsp. enterica serovar Corvallis | hypothetical protein DRL12_24325, partial [Salmonella enterica subsp. enterica serovar Corvallis]. | GCA_006993385.1 |
| EBS6357254.1 | HetE-N1→ TPR+GreAB-C+PIN*→               | TPR+GreAB-C+PIN | 999  | D4E88_23815 | Gammaproteobacteria | Salmonella enterica subsp. enterica serovar Albany    | hypothetical protein D4E88_23815, partial [Salmonella enterica subsp. enterica serovar Albany].    | GCA_007016725.1 |
| EBU7006421.1 | TPR+GreAB-C+PIN*→                        | TPR+GreAB-C+PIN | 620  | DKU11_24275 | Gammaproteobacteria | Salmonella enterica subsp. enterica serovar Kintambo  | hypothetical protein DKU11_24275, partial [Salmonella enterica subsp. enterica serovar Kintambo].  | GCA_007139165.1 |

| acc          | operon                     | architecture    | len  | gen.name    | taxend              | species                                                 | define                                                                                               | gca             |
|--------------|----------------------------|-----------------|------|-------------|---------------------|---------------------------------------------------------|------------------------------------------------------------------------------------------------------|-----------------|
| EBU7167144.1 | HetE-N1→ TPR+GreAB-C+PIN*→ | TPR+GreAB-C+PIN | 1106 | DKU92_07615 | Gammaproteobacteria | Salmonella enterica subsp. enterica serovar Stockholm   | hypothetical protein DKU92_07615 [Salmonella enterica subsp. enterica serovar Stockholm].            | GCA_007140245.1 |
| EBV1256929.1 | TPR+GreAB-C+PIN*→          | TPR+GreAB-C+PIN | 719  | DNW25_24775 | Gammaproteobacteria | Salmonella enterica subsp. enterica serovar Corvallis   | hypothetical protein DNW25_24775, partial [Salmonella enterica subsp. enterica serovar Corvallis].   | GCA_007158045.1 |
| EBV2191014.1 | HetE-N1→ TPR+GreAB-C+PIN*→ | TPR+GreAB-C+PIN | 1106 | DN155_01500 | Gammaproteobacteria | Salmonella enterica subsp. enterica serovar Afula       | hypothetical protein DN155_01500 [Salmonella enterica subsp. enterica serovar Afula].                | GCA_007161245.1 |
| EBV8290347.1 | HetE-N1→ TPR+GreAB-C+PIN*→ | TPR+GreAB-C+PIN | 704  | AUE34_22015 | Gammaproteobacteria | Salmonella enterica subsp. arizonae serovar 18:z4,z23:- | hypothetical protein AUE34_22015, partial [Salmonella enterica subsp. arizonae serovar 18:z4,z23:-]. | GCA_007188075.1 |
| EBV8290357.1 | TPR+GreAB-C+PIN*→          | TPR+GreAB-C+PIN | 385  | AUE34_22090 | Gammaproteobacteria | Salmonella enterica subsp. arizonae serovar 18:z4,z23:- | hypothetical protein AUE34_22090, partial [Salmonella enterica subsp. arizonae serovar 18:z4,z23:-]. | GCA_007188075.1 |
| EBV8849078.1 | HetE-N1→ TPR+GreAB-C+PIN*→ | TPR+GreAB-C+PIN | 1000 | AUA06_21700 | Gammaproteobacteria | Salmonella enterica subsp. arizonae serovar 18:z4,z23:- | hypothetical protein AUA06_21700, partial [Salmonella enterica subsp. arizonae serovar 18:z4,z23:-]. | GCA_007190395.1 |
| EBV8917369.1 | HetE-N1→ TPR+GreAB-C+PIN*→ | TPR+GreAB-C+PIN | 688  | ASH63_21975 | Gammaproteobacteria | Salmonella enterica subsp. arizonae serovar 18:z4,z23:- | hypothetical protein ASH63_21975, partial [Salmonella enterica subsp. arizonae serovar 18:z4,z23:-]. | GCA_007194415.1 |
| EBV9159081.1 | TPR+GreAB-C+PIN*→          | TPR+GreAB-C+PIN | 620  | ASA02_25470 | Gammaproteobacteria | Salmonella enterica subsp. enterica serovar Alachua     | hypothetical protein ASA02_25470, partial [Salmonella enterica subsp. enterica serovar Alachua].     | GCA_007191635.1 |
| EBV9391419.1 | HetE-N1→ TPR+GreAB-C+PIN*→ | TPR+GreAB-C+PIN | 665  | AUA09_21865 | Gammaproteobacteria | Salmonella enterica subsp. arizonae serovar 18:z4,z23:- | hypothetical protein AUA09_21865, partial [Salmonella enterica subsp. arizonae serovar 18:z4,z23:-]. | GCA_007194695.1 |
| EBV9454977.1 | TPR+GreAB-C*→              | TPR+GreAB-C     | 257  | AUA11_22355 | Gammaproteobacteria | Salmonella enterica subsp. arizonae serovar 18:z4,z23:- | hypothetical protein AUA11_22355, partial [Salmonella enterica subsp. arizonae serovar 18:z4,z23:-]. | GCA_007193095.1 |
| EBV9865076.1 | TPR+GreAB-C*→              | TPR+GreAB-C     | 371  | AUA58_21825 | Gammaproteobacteria | Salmonella enterica subsp. arizonae serovar 18:z4,z23:- | hypothetical protein AUA58_21825, partial [Salmonella enterica subsp. arizonae serovar 18:z4,z23:-]. | GCA_007194715.1 |
| EBV9897412.1 | TPR+GreAB-C*→              | TPR+GreAB-C     | 379  | AUA59_22385 | Gammaproteobacteria | Salmonella enterica subsp. arizonae serovar 18:z4,z23:- | hypothetical protein AUA59_22385, partial [Salmonella enterica subsp. arizonae serovar 18:z4,z23:-]. | GCA_007194855.1 |
| EBW0217976.1 | HetE-N1→ TPR+GreAB-C+PIN*→ | TPR+GreAB-C+PIN | 1107 | AUA78_22040 | Gammaproteobacteria | Salmonella enterica subsp. arizonae serovar 18:z4,z23:- | hypothetical protein AUA78_22040 [Salmonella enterica subsp. arizonae serovar 18:z4,z23:-].          | GCA_007204575.1 |
| EBW0231167.1 | HetE-N1→ TPR+GreAB-C+PIN*→ | TPR+GreAB-C+PIN | 990  | AUA77_22025 | Gammaproteobacteria | Salmonella enterica subsp. arizonae serovar 18:z4,z23:- | hypothetical protein AUA77_22025, partial [Salmonella enterica subsp. arizonae serovar 18:z4,z23:-]. | GCA_007204595.1 |
| EBW0678507.1 | TPR+GreAB-C+PIN*→          | TPR+GreAB-C+PIN | 861  | AR803_21985 | Gammaproteobacteria | Salmonella enterica subsp. arizonae serovar 18:z4,z23:- | hypothetical protein AR803_21985, partial [Salmonella enterica subsp. arizonae serovar 18:z4,z23:-]. | GCA_007197055.1 |
| EBW5988048.1 | TPR+GreAB-C+PIN*→          | TPR+GreAB-C+PIN | 813  | AUB18_21995 | Gammaproteobacteria | Salmonella enterica subsp. arizonae serovar 18:z4,z23:- | hypothetical protein AUB18_21995, partial [Salmonella enterica subsp. arizonae serovar 18:z4,z23:-]. | GCA_007217995.1 |
| EBW8169800.1 | TPR+GreAB-C*→              | TPR+GreAB-C     | 283  | AUB36_22265 | Gammaproteobacteria | Salmonella enterica subsp. arizonae serovar 18:z4,z23:- | hypothetical protein AUB36_22265, partial [Salmonella enterica subsp. arizonae serovar 18:z4,z23:-]. | GCA_007226835.1 |
| EBW9751630.1 | HetE-N1→ TPR+GreAB-C+PIN*→ | TPR+GreAB-C+PIN | 1106 | DQR71_22645 | Gammaproteobacteria | Salmonella enterica subsp. enterica serovar Kingston    | hypothetical protein DQR71_22645 [Salmonella enterica subsp. enterica serovar Kingston].             | GCA_007234155.1 |

| acc          | operon                                      | architecture    | len  | gen.name    | taxend              | species                                               | define                                                                                             | gca             |
|--------------|---------------------------------------------|-----------------|------|-------------|---------------------|-------------------------------------------------------|----------------------------------------------------------------------------------------------------|-----------------|
| EBX0426906.1 | HetE-N1→ TPR+GreAB-C+PIN*→                  | TPR+GreAB-C+PIN | 864  | DP854_08040 | Gammaproteobacteria | Salmonella enterica subsp. enterica serovar Corvallis | hypothetical protein DP854_08040, partial [Salmonella enterica subsp. enterica serovar Corvallis]. | GCA_007237735.1 |
| EBX5460983.1 | HetE-N1→ TPR+GreAB-C+PIN*→                  | TPR+GreAB-C+PIN | 817  | DSN29_17980 | Gammaproteobacteria | Salmonella enterica subsp. enterica serovar Corvallis | hypothetical protein DSN29_17980, partial [Salmonella enterica subsp. enterica serovar Corvallis]. | GCA_007257955.1 |
| EBX5569113.1 | HetE-N1→ TPR+GreAB-C+PIN*→                  | TPR+GreAB-C+PIN | 1106 | DSN37_03170 | Gammaproteobacteria | Salmonella enterica subsp. enterica serovar Kuessel   | hypothetical protein DSN37_03170 [Salmonella enterica subsp. enterica serovar Kuessel].            | GCA_007259425.1 |
| EBX6009347.1 | TPR+GreAB-C+PIN*→                           | TPR+GreAB-C+PIN | 1021 | DSR61_24855 | Gammaproteobacteria | Salmonella enterica subsp. enterica serovar Corvallis | hypothetical protein DSR61_24855, partial [Salmonella enterica subsp. enterica serovar Corvallis]. | GCA_007258725.1 |
| EBY0196060.1 | HetE-N1→ TPR+GreAB-C+PIN*→                  | TPR+GreAB-C+PIN | 991  | DUP89_08940 | Gammaproteobacteria | Salmonella enterica subsp. enterica serovar Corvallis | hypothetical protein DUP89_08940, partial [Salmonella enterica subsp. enterica serovar Corvallis]. | GCA_007275795.1 |
| EBY1533788.1 | HetE-N1→?→ TPR+GreAB-C+PIN*→                | TPR+GreAB-C+PIN | 775  | DTD21_03800 | Gammaproteobacteria | Salmonella enterica subsp. enterica serovar Mgulani   | hypothetical protein DTD21_03800 [Salmonella enterica subsp. enterica serovar Mgulani].            | GCA_007282305.1 |
| EBY3547778.1 | HetE-N1→ TPR+GreAB-C+PIN*→                  | TPR+GreAB-C+PIN | 781  | D4F04_22510 | Gammaproteobacteria | Salmonella enterica subsp. enterica serovar Corvallis | hypothetical protein D4F04_22510, partial [Salmonella enterica subsp. enterica serovar Corvallis]. | GCA_007290715.1 |
| ECB7917957.1 | HetE-N1→ TPR+GreAB-C+PIN*→                  | TPR+GreAB-C+PIN | 841  | E1365_23450 | Gammaproteobacteria | Salmonella enterica subsp. enterica serovar Corvallis | hypothetical protein E1365_23450, partial [Salmonella enterica subsp. enterica serovar Corvallis]. | GCA_007440385.1 |
| ECC0701089.1 | HetE-N1→?→ TPR+GreAB-C+PIN*→                | TPR+GreAB-C+PIN | 815  | FMV45_11650 | Gammaproteobacteria | Salmonella enterica subsp. enterica serovar Mgulani   | hypothetical protein FMV45_11650 [Salmonella enterica subsp. enterica serovar Mgulani].            | GCA_007457195.1 |
| ECC3303083.1 | TPR+GreAB-C+PIN*→                           | TPR+GreAB-C+PIN | 878  | ACP91_22675 | Gammaproteobacteria | Salmonella enterica subsp. arizonae                   | hypothetical protein ACP91_22675, partial [Salmonella enterica subsp. arizonae].                   | GCA_007472415.1 |
| ECC9297450.1 | TPR+GreAB-C+PIN*→?→   <-Trypsin             | TPR+GreAB-C+PIN | 1011 | DRF02_24595 | Gammaproteobacteria | Salmonella enterica subsp. salamae                    | hypothetical protein DRF02_24595 [Salmonella enterica subsp. salamae].                             | GCA_007500125.1 |
| ECE0143412.1 | TPR+GreAB-C+PIN*→                           | TPR+GreAB-C+PIN | 625  | NC53_22885  | Gammaproteobacteria | Salmonella enterica subsp. arizonae                   | hypothetical protein NC53_22885, partial [Salmonella enterica subsp. arizonae].                    | GCA_007547655.1 |
| ECE0541238.1 | TPR+GreAB-C+PIN*→                           | TPR+GreAB-C+PIN | 879  | ACK19_22505 | Gammaproteobacteria | Salmonella enterica subsp. arizonae                   | hypothetical protein ACK19_22505, partial [Salmonella enterica subsp. arizonae].                   | GCA_007549055.1 |
| ECE0545534.1 | TPR+GreAB-C*→                               | TPR+GreAB-C     | 384  | ACK84_23000 | Gammaproteobacteria | Salmonella enterica subsp. arizonae                   | hypothetical protein ACK84_23000, partial [Salmonella enterica subsp. arizonae].                   | GCA_007549175.1 |
| ECE0554408.1 | HetE-N1→ TPR+GreAB-C+PIN*→                  | TPR+GreAB-C+PIN | 669  | ACK35_22635 | Gammaproteobacteria | Salmonella enterica subsp. arizonae                   | hypothetical protein ACK35_22635, partial [Salmonella enterica subsp. arizonae].                   | GCA_007549195.1 |
| ECE0554409.1 | TPR+GreAB-C+PIN*→                           | TPR+GreAB-C+PIN | 428  | ACK35_22640 | Gammaproteobacteria | Salmonella enterica subsp. arizonae                   | hypothetical protein ACK35_22640, partial [Salmonella enterica subsp. arizonae].                   | GCA_007549195.1 |
| ECE1015908.1 | HetE-N1→ TPR+GreAB-C+PIN*→                  | TPR+GreAB-C+PIN | 1116 | AHY48_24995 | Gammaproteobacteria | Salmonella enterica subsp. enterica                   | hypothetical protein AHY48_24995 [Salmonella enterica subsp. enterica].                            | GCA_007551035.1 |
| ECF6862263.1 | TPR+GreAB-C+PIN*→                           | TPR+GreAB-C+PIN | 985  | C702_18880  | Gammaproteobacteria | Salmonella enterica subsp. enterica serovar Labadi    | hypothetical protein C702_18880 [Salmonella enterica subsp. enterica serovar Labadi].              | GCA_007627255.1 |
| ECF7216075.1 | HetE-N1→ TPR+GreAB-C+PIN*→                  | TPR+GreAB-C+PIN | 985  | ACL93_22670 | Gammaproteobacteria | Salmonella enterica subsp. arizonae                   | hypothetical protein ACL93_22670, partial [Salmonella enterica subsp. arizonae].                   | GCA_007627105.1 |
| ECF7535990.1 | HetE-N1→ TPR+GreAB-C+PIN*→                  | TPR+GreAB-C+PIN | 866  | AF553_23825 | Gammaproteobacteria | Salmonella enterica subsp. enterica                   | hypothetical protein AF553_23825, partial [Salmonella enterica subsp. enterica].                   | GCA_007629935.1 |
| ECG8314709.1 | HetE-N1→ TPR+GreAB-C+PIN*→                  | TPR+GreAB-C+PIN | 967  | E1871_22275 | Gammaproteobacteria | Salmonella enterica subsp. enterica serovar Mgulani   | hypothetical protein E1871_22275 [Salmonella enterica subsp. enterica serovar Mgulani].            | GCA_007694365.1 |
| ECH7956768.1 | HetE-N1→ TPR+GreAB-C+PIN*→                  | TPR+GreAB-C+PIN | 731  | SW47_20185  | Gammaproteobacteria | Salmonella enterica subsp. enterica                   | hypothetical protein SW47_20185, partial [Salmonella enterica subsp. enterica].                    | GCA_007742835.1 |
| ECH9260474.1 | HetE-N1→ TPR+GreAB-C+PIN→ TPR+GreAB-C+PIN*→ | TPR+GreAB-C+PIN | 654  | YR28_14840  | Gammaproteobacteria | Salmonella enterica subsp. enterica                   | hypothetical protein YR28_14840 [Salmonella enterica subsp. enterica].                             | GCA_007749495.1 |

| acc          | operon                                                                                 | architecture    | len  | gen.name    | taxend              | species                                                 | define                                                                                               | gca             |
|--------------|----------------------------------------------------------------------------------------|-----------------|------|-------------|---------------------|---------------------------------------------------------|------------------------------------------------------------------------------------------------------|-----------------|
| ECI0362610.1 | HetE-N1→ TPR+GreAB-C+PIN*→                                                             | TPR+GreAB-C+PIN | 969  | ACK10_22270 | Gammaproteobacteria | Salmonella enterica subsp. arizonae                     | hypothetical protein ACK10_22270, partial [Salmonella enterica subsp. arizonae].                     | GCA_007755195.1 |
| ECI0389037.1 | TPR+GreAB-C*→                                                                          | TPR+GreAB-C     | 376  | ACL48_23155 | Gammaproteobacteria | Salmonella enterica subsp. arizonae                     | hypothetical protein ACL48_23155, partial [Salmonella enterica subsp. arizonae].                     | GCA_007754635.1 |
| ECI1216662.1 | TPR+GreAB-C+PIN*→                                                                      | TPR+GreAB-C+PIN | 836  | AF582_21855 | Gammaproteobacteria | Salmonella enterica subsp. arizonae                     | hypothetical protein AF582_21855, partial [Salmonella enterica subsp. arizonae].                     | GCA_007758765.1 |
| ECI5614625.1 | HetE-N1→?→ TPR+GreAB-C+PIN*→                                                           | TPR+GreAB-C+PIN | 655  | AHW94_03505 | Gammaproteobacteria | Salmonella enterica subsp. enterica                     | hypothetical protein AHW94_03505, partial [Salmonella enterica subsp. enterica].                     | GCA_007777085.1 |
| ECM8537065.1 | HetE-N1→ TPR+GreAB-C+PIN*→                                                             | TPR+GreAB-C+PIN | 1117 | YI35_19225  | Gammaproteobacteria | Salmonella enterica subsp. enterica serovar Corvallis   | hypothetical protein YI35_19225 [Salmonella enterica subsp. enterica serovar Corvallis].             | GCA_008050935.1 |
| ECS4963358.1 | TPR+GreAB-C+PIN*→                                                                      | TPR+GreAB-C+PIN | 874  | A9T74_22060 | Gammaproteobacteria | Salmonella enterica subsp. arizonae serovar 18:z4,z23:- | hypothetical protein A9T74_22060, partial [Salmonella enterica subsp. arizonae serovar 18:z4,z23:-]. | GCA_008426085.1 |
| ECS5089259.1 | TPR+GreAB-C+PIN*→                                                                      | TPR+GreAB-C+PIN | 688  | A9T03_21360 | Gammaproteobacteria | Salmonella enterica subsp. arizonae serovar 18:z4,z23:- | hypothetical protein A9T03_21360, partial [Salmonella enterica subsp. arizonae serovar 18:z4,z23:-]. | GCA_008426245.1 |
| ECS5722565.1 | HetE-N1→ TPR+GreAB-C+PIN*→                                                             | TPR+GreAB-C+PIN | 763  | BEE21_21925 | Gammaproteobacteria | Salmonella enterica                                     | hypothetical protein BEE21_21925, partial [Salmonella enterica].                                     | GCA_008427725.1 |
| ECS7544753.1 | HetE-N1→ TPR+GreAB-C+PIN*→?→   <-Trypsin                                               | TPR+GreAB-C+PIN | 1121 | CI474_11845 | Gammaproteobacteria | Salmonella enterica subsp. enterica serovar Denver      | hypothetical protein CI474_11845 [Salmonella enterica subsp. enterica serovar Denver].               | GCA_008435705.1 |
| ECU7350952.1 | TPR+GreAB-C+PIN*→                                                                      | TPR+GreAB-C+PIN | 816  | A9S02_22180 | Gammaproteobacteria | Salmonella enterica subsp. enterica serovar Kentucky    | hypothetical protein A9S02_22180, partial [Salmonella enterica subsp. enterica serovar Kentucky].    | GCA_008522685.1 |
| ECV0014755.1 | TPR+GreAB-C+PIN*→                                                                      | TPR+GreAB-C+PIN | 672  | C9G23_25520 | Gammaproteobacteria | Salmonella enterica                                     | hypothetical protein C9G23_25520 [Salmonella enterica].                                              | GCA_008534115.1 |
| ECX3800078.1 | HetE-N1→ TPR+GreAB-C+PIN*→                                                             | TPR+GreAB-C+PIN | 647  | F6B58_20445 | Gammaproteobacteria | Salmonella enterica                                     | hypothetical protein F6B58_20445, partial [Salmonella enterica].                                     | GCA_008659475.1 |
| ECY0836069.1 | MarR-HTH→   <-PSE  PSE→   <-?  ?→?→   <-?  ?→ HetE-N1→ TPR+GreAB-C+PIN*→?→   <-Trypsin | TPR+GreAB-C+PIN | 1121 | F6Y43_14905 | Gammaproteobacteria | Salmonella enterica subsp. enterica                     | hypothetical protein F6Y43_14905 [Salmonella enterica subsp. enterica].                              | GCA_008716255.1 |
| ECY8988972.1 | HetE-N1→ TPR+GreAB-C+PIN*→                                                             | TPR+GreAB-C+PIN | 1117 | F7L41_18095 | Gammaproteobacteria | Salmonella enterica                                     | hypothetical protein F7L41_18095 [Salmonella enterica].                                              | GCA_008760695.1 |
| ECZ2850292.1 | TPR+GreAB-C+PIN*→                                                                      | TPR+GreAB-C+PIN | 736  | F7T15_22920 | Gammaproteobacteria | Salmonella enterica                                     | hypothetical protein F7T15_22920, partial [Salmonella enterica].                                     | GCA_008785865.1 |
| EDA5083812.1 | HetE-N1→ TPR+GreAB-C+PIN*→                                                             | TPR+GreAB-C+PIN | 861  | F9F62_19420 | Gammaproteobacteria | Salmonella enterica                                     | hypothetical protein F9F62_19420, partial [Salmonella enterica].                                     | GCA_008860845.1 |
| EDB4036569.1 | HetE-N1→ TPR+GreAB-C+PIN*→                                                             | TPR+GreAB-C+PIN | 810  | A6J23_15240 | Gammaproteobacteria | Salmonella enterica                                     | hypothetical protein A6J23_15240, partial [Salmonella enterica].                                     | GCA_008904195.1 |
| EDB4763898.1 | TPR+GreAB-C+PIN*→                                                                      | TPR+GreAB-C+PIN | 985  | A8H08_23565 | Gammaproteobacteria | Salmonella enterica subsp. enterica serovar Corvallis   | hypothetical protein A8H08_23565 [Salmonella enterica subsp. enterica serovar Corvallis].            | GCA_008907365.1 |
| EDB6166846.1 | HetE-N1→ TPR+GreAB-C+PIN*→                                                             | TPR+GreAB-C+PIN | 994  | BBD73_10015 | Gammaproteobacteria | Salmonella enterica subsp. enterica serovar Corvallis   | hypothetical protein BBD73_10015, partial [Salmonella enterica subsp. enterica serovar Corvallis].   | GCA_008914005.1 |
| EDN4259744.1 | HetE-N1→ TPR+GreAB-C+PIN*→                                                             | TPR+GreAB-C+PIN | 840  | Y652_004461 | Gammaproteobacteria | Salmonella enterica subsp. enterica                     | hypothetical protein Y652_004461, partial [Salmonella enterica subsp. enterica].                     | GCA_009997765.1 |
| EDO1617810.1 | HetE-N1→ TPR+GreAB-C+PIN*→                                                             | TPR+GreAB-C+PIN | 838  | CVA64_22730 | Gammaproteobacteria | Salmonella enterica subsp. enterica serovar Molade      | hypothetical protein CVA64_22730, partial [Salmonella enterica subsp. enterica serovar Molade].      | GCA_010125745.1 |
| EDP8916875.1 | HetE-N1→ TPR+GreAB-C+PIN*→                                                             | TPR+GreAB-C+PIN | 775  | ZT80_004634 | Gammaproteobacteria | Salmonella enterica subsp. enterica serovar Chailey     | hypothetical protein ZT80_004634, partial [Salmonella enterica subsp. enterica serovar Chailey].     | GCA_010369345.1 |

| acc          | operon                                                                   | architecture    | len  | gen.name     | taxend              | species                                               | define                                                                                            | gca             |
|--------------|--------------------------------------------------------------------------|-----------------|------|--------------|---------------------|-------------------------------------------------------|---------------------------------------------------------------------------------------------------|-----------------|
| EDP9779517.1 | HetE-N1→ TPR+GreAB-C+PIN*→                                               | TPR+GreAB-C+PIN | 844  | A9223_002456 | Gammaproteobacteria | Salmonella enterica subsp. enterica serovar Alachua   | hypothetical protein A9223_002456, partial [Salmonella enterica subsp. enterica serovar Alachua]. | GCA_010373825.1 |
| EDR2934822.1 | HetE-N1→ TPR+GreAB-C+PIN*→                                               | TPR+GreAB-C+PIN | 754  | KS39_001997  | Gammaproteobacteria | Salmonella enterica subsp. enterica serovar Ruiru     | hypothetical protein KS39_001997, partial [Salmonella enterica subsp. enterica serovar Ruiru].    | GCA_010439595.1 |
| EDR3921234.1 | <-HTH<-?<-PSE  HetE-N1→ TPR+GreAB-C+PIN*→                                | TPR+GreAB-C+PIN | 1101 | BWC65_003323 | Gammaproteobacteria | Salmonella enterica                                   | hypothetical protein BWC65_003323 [Salmonella enterica].                                          | GCA_010444135.1 |
| EDR7156767.1 | HetE-N1→ TPR+GreAB-C+PIN→ TPR+GreAB-C+PIN*→                              | TPR+GreAB-C+PIN | 457  | GRJ98_004481 | Gammaproteobacteria | Salmonella enterica                                   | hypothetical protein GRJ98_004481 [Salmonella enterica].                                          | GCA_010460165.1 |
| EDR9691108.1 | TPR+GreAB-C+PIN*→                                                        | TPR+GreAB-C+PIN | 644  | CSL67_004218 | Gammaproteobacteria | Salmonella enterica subsp. arizonae                   | hypothetical protein CSL67_004218 [Salmonella enterica subsp. arizonae].                          | GCA_010471185.1 |
| EDT9803200.1 | HetE-N1→ TPR+GreAB-C+PIN*→                                               | TPR+GreAB-C+PIN | 828  | GQ119_004456 | Gammaproteobacteria | Salmonella enterica                                   | hypothetical protein GQ119_004456, partial [Salmonella enterica].                                 | GCA_010569565.1 |
| EDU6324669.1 | HetE-N1→ TPR+GreAB-C+PIN*→?→   <-Trypsin                                 | TPR+GreAB-C+PIN | 1121 | CAE39_004078 | Gammaproteobacteria | Salmonella enterica subsp. enterica serovar Edinburgh | hypothetical protein CAE39_004078 [Salmonella enterica subsp. enterica serovar Edinburgh].        | GCA_010619425.1 |
| EDV9361828.1 | HetE-N1→ TPR+GreAB-C+PIN*→                                               | TPR+GreAB-C+PIN | 870  | QG02_001683  | Gammaproteobacteria | Salmonella enterica subsp. enterica                   | hypothetical protein QG02_001683, partial [Salmonella enterica subsp. enterica].                  | GCA_010676285.1 |
| EDW0654491.1 | <-HTH<-?<-?  HetE-N1→ TPR+GreAB-C+PIN*→                                  | TPR+GreAB-C+PIN | 1106 | JU54_004053  | Gammaproteobacteria | Salmonella enterica subsp. enterica serovar Weslaco   | hypothetical protein JU54_004053 [Salmonella enterica subsp. enterica serovar Weslaco].           | GCA_010695505.1 |
| EDW1854316.1 | TPR+GreAB-C+PIN*→                                                        | TPR+GreAB-C+PIN | 1107 | S887_003116  | Gammaproteobacteria | Salmonella enterica subsp. diarizonae                 | hypothetical protein S887_003116 [Salmonella enterica subsp. diarizonae].                         | GCA_010701205.1 |
| EDW7381411.1 | HetE-N1→ TPR+GreAB-C+PIN*→                                               | TPR+GreAB-C+PIN | 838  | CJF03_003360 | Gammaproteobacteria | Salmonella enterica subsp. enterica serovar Alachua   | hypothetical protein CJF03_003360, partial [Salmonella enterica subsp. enterica serovar Alachua]. | GCA_010728605.1 |
| EDX0815680.1 | MarR-HTH→   <-PSE  PSE→   <-?  ?→?→   <-?  ?→ HetE-N1→ TPR+GreAB-C+PIN*→ | TPR+GreAB-C+PIN | 1047 | GTA77_003301 | Gammaproteobacteria | Salmonella enterica subsp. enterica                   | hypothetical protein GTA77_003301, partial [Salmonella enterica subsp. enterica].                 | GCA_010745015.1 |
| EDY1906151.1 | MarR-HTH→   <-PSE  PSE→   <-?  ?→?→   <-?  ?→ HetE-N1→ TPR+GreAB-C+PIN*→ | TPR+GreAB-C+PIN | 1043 | GTA76_003216 | Gammaproteobacteria | Salmonella enterica subsp. enterica                   | hypothetical protein GTA76_003216, partial [Salmonella enterica subsp. enterica].                 | GCA_010803285.1 |
| EDY7338112.1 | HetE-N1→ TPR+GreAB-C+PIN*→                                               | TPR+GreAB-C+PIN | 873  | GRN59_004759 | Gammaproteobacteria | Salmonella enterica subsp. enterica serovar Alachua   | hypothetical protein GRN59_004759, partial [Salmonella enterica subsp. enterica serovar Alachua]. | GCA_010827805.1 |
| EDZ6443278.1 | HetE-N1→ TPR+GreAB-C+PIN*→                                               | TPR+GreAB-C+PIN | 813  | GOH01_21475  | Gammaproteobacteria | Salmonella enterica                                   | hypothetical protein GOH01_21475, partial [Salmonella enterica].                                  | GCA_010859905.1 |
| EED4174297.1 | HetE-N1→ TPR+GreAB-C+PIN*→                                               | TPR+GreAB-C+PIN | 944  | S577_12620   | Gammaproteobacteria | Salmonella enterica subsp. enterica serovar Rubislaw  | hypothetical protein S577_12620, partial [Salmonella enterica subsp. enterica serovar Rubislaw].  | GCA_011083145.1 |
| EEG2646873.1 | HetE-N1→ TPR+GreAB-C+PIN*→                                               | TPR+GreAB-C+PIN | 1117 | GXG13_10075  | Gammaproteobacteria | Salmonella enterica                                   | hypothetical protein GXG13_10075 [Salmonella enterica].                                           | GCA_011218655.1 |
| EEH6562392.1 | TPR+GreAB-C+PIN*→                                                        | TPR+GreAB-C+PIN | 561  | G9D83_004649 | Gammaproteobacteria | Salmonella enterica                                   | hypothetical protein G9D83_004649, partial [Salmonella enterica].                                 | GCA_011296115.1 |
| EEH8607740.1 | HetE-N1→ TPR+GreAB-C+PIN*→                                               | TPR+GreAB-C+PIN | 751  | GXG09_15375  | Gammaproteobacteria | Salmonella enterica                                   | hypothetical protein GXG09_15375, partial [Salmonella enterica].                                  | GCA_011310075.1 |
| EEI7790049.1 | TPR+GreAB-C+PIN*→                                                        | TPR+GreAB-C+PIN | 1003 | G7421_004640 | Gammaproteobacteria | Salmonella enterica                                   | hypothetical protein G7421_004640, partial [Salmonella enterica].                                 | GCA_011384105.1 |
| EEJ3916542.1 | HetE-N1→ TPR+GreAB-C+PIN*→                                               | TPR+GreAB-C+PIN | 931  | C1D58_004804 | Gammaproteobacteria | Salmonella enterica subsp. enterica serovar Waral     | hypothetical protein C1D58_004804, partial [Salmonella enterica subsp. enterica serovar Waral].   | GCA_011421105.1 |
| EEJ8590178.1 | HetE-N1→ TPR+GreAB-C+PIN*→                                               | TPR+GreAB-C+PIN | 1106 | YR33_002856  | Gammaproteobacteria | Salmonella enterica subsp. enterica                   | hypothetical protein YR33_002856 [Salmonella enterica subsp. enterica].                           | GCA_011444435.1 |

| acc          | operon                     | architecture    | len  | gen.name     | taxend              | species                                               | define                                                                                              | gca             |
|--------------|----------------------------|-----------------|------|--------------|---------------------|-------------------------------------------------------|-----------------------------------------------------------------------------------------------------|-----------------|
| EEM3099552.1 | HetE-N1→ TPR+GreAB-C+PIN*→ | TPR+GreAB-C+PIN | 837  | C7106_19315  | Gammaproteobacteria | Salmonella enterica subsp. enterica serovar Corvallis | hypothetical protein C7106_19315, partial [Salmonella enterica subsp. enterica serovar Corvallis].  | GCA_011562745.1 |
| EEN9063089.1 | TPR+GreAB-C+PIN*→          | TPR+GreAB-C+PIN | 1003 | G5014_004598 | Gammaproteobacteria | Salmonella enterica subsp. enterica                   | hypothetical protein G5014_004598, partial [Salmonella enterica subsp. enterica].                   | GCA_011642815.1 |
| EEO4791769.1 | GreAB-C*→                  | GreAB-C         | 475  | GCV36_004805 | Gammaproteobacteria | Salmonella enterica                                   | hypothetical protein GCV36_004805, partial [Salmonella enterica].                                   | GCA_011672825.1 |
| EEP6626700.1 | TPR+GreAB-C+PIN*→          | TPR+GreAB-C+PIN | 1098 | HB923_004453 | Gammaproteobacteria | Salmonella enterica                                   | hypothetical protein HB923_004453, partial [Salmonella enterica].                                   | GCA_011737335.1 |
| EEQ0870631.1 | GreAB-C*→                  | GreAB-C         | 401  | HC115_004664 | Gammaproteobacteria | Salmonella enterica subsp. enterica serovar Corvallis | hypothetical protein HC115_004664, partial [Salmonella enterica subsp. enterica serovar Corvallis]. | GCA_011766905.1 |
| EER8058271.1 | HetE-N1→ TPR+GreAB-C+PIN*→ | TPR+GreAB-C+PIN | 1094 | F0645_003838 | Gammaproteobacteria | Escherichia coli                                      | hypothetical protein F0645_003838 [Escherichia coli].                                               | GCA_011871345.1 |
| EES4613658.1 | HetE-N1→ TPR+GreAB-C+PIN*→ | TPR+GreAB-C+PIN | 1094 | EZQ25_003302 | Gammaproteobacteria | Escherichia coli                                      | hypothetical protein EZQ25_003302 [Escherichia coli].                                               | GCA_011897605.1 |
| EEU6346619.1 | TPR+GreAB-C+PIN*→          | TPR+GreAB-C+PIN | 663  | HES36_004810 | Gammaproteobacteria | Salmonella enterica                                   | hypothetical protein HES36_004810, partial [Salmonella enterica].                                   | GCA_011985205.1 |
| EEU8409948.1 | TPR+GreAB-C+PIN*→          | TPR+GreAB-C+PIN | 733  | HDI19_004538 | Gammaproteobacteria | Salmonella enterica                                   | hypothetical protein HDI19_004538, partial [Salmonella enterica].                                   | GCA_012002765.1 |
| EEU8431734.1 | TPR+GreAB-C+PIN*→          | TPR+GreAB-C+PIN | 770  | HDI14_004564 | Gammaproteobacteria | Salmonella enterica                                   | hypothetical protein HDI14_004564, partial [Salmonella enterica].                                   | GCA_012002965.1 |
| EEU8450206.1 | TPR+GreAB-C+PIN*→          | TPR+GreAB-C+PIN | 686  | HDI09_004415 | Gammaproteobacteria | Salmonella enterica                                   | hypothetical protein HDI09_004415, partial [Salmonella enterica].                                   | GCA_012003165.1 |
| EEU8461067.1 | HetE-N1→ TPR+GreAB-C+PIN*→ | TPR+GreAB-C+PIN | 777  | HDI12_003619 | Gammaproteobacteria | Salmonella enterica                                   | hypothetical protein HDI12_003619, partial [Salmonella enterica].                                   | GCA_012003025.1 |
| EEU8472241.1 | HetE-N1→ TPR+GreAB-C+PIN*→ | TPR+GreAB-C+PIN | 832  | HDI08_003001 | Gammaproteobacteria | Salmonella enterica                                   | hypothetical protein HDI08_003001, partial [Salmonella enterica].                                   | GCA_012003185.1 |
| EEU8646489.1 | HetE-N1→ TPR+GreAB-C+PIN*→ | TPR+GreAB-C+PIN | 746  | HDI02_002414 | Gammaproteobacteria | Salmonella enterica                                   | hypothetical protein HDI02_002414, partial [Salmonella enterica].                                   | GCA_012004065.1 |
| EEV5892122.1 | HetE-N1→ TPR+GreAB-C+PIN*→ | TPR+GreAB-C+PIN | 1094 | ELJ91_00185  | Gammaproteobacteria | Escherichia coli                                      | hypothetical protein ELJ91_00185 [Escherichia coli].                                                | GCA_012046565.1 |
| EEW2250301.1 | TPR+GreAB-C+PIN*→          | TPR+GreAB-C+PIN | 649  | D9F29_22745  | Gammaproteobacteria | Escherichia coli                                      | hypothetical protein D9F29_22745, partial [Escherichia coli].                                       | GCA_012074905.1 |
| EEW6232025.1 | TPR+GreAB-C+PIN*→          | TPR+GreAB-C+PIN | 1025 | D7V76_23725  | Gammaproteobacteria | Escherichia coli                                      | hypothetical protein D7V76_23725, partial [Escherichia coli].                                       | GCA_012087875.1 |
| EEZ4464859.1 | HetE-N1→ TPR+GreAB-C+PIN*→ | TPR+GreAB-C+PIN | 1009 | DED50_002664 | Gammaproteobacteria | Escherichia coli                                      | hypothetical protein DED50_002664, partial [Escherichia coli].                                      | GCA_012207825.1 |
| EFA5448049.1 | GreAB-C*→                  | GreAB-C         | 270  | EZF43_26870  | Gammaproteobacteria | Escherichia coli                                      | hypothetical protein EZF43_26870, partial [Escherichia coli].                                       | GCA_012252965.1 |
| EFB4141030.1 | TPR+GreAB-C+PIN*→          | TPR+GreAB-C+PIN | 803  | C0X77_005316 | Gammaproteobacteria | Escherichia coli O88:H1                               | hypothetical protein C0X77_005316, partial [Escherichia coli O88:H1].                               | GCA_012307025.1 |
| EFB7592548.1 | TPR+GreAB-C+PIN*→          | TPR+GreAB-C+PIN | 871  | E4J78_25685  | Gammaproteobacteria | Escherichia coli                                      | hypothetical protein E4J78_25685, partial [Escherichia coli].                                       | GCA_012318985.1 |
| EFD6843528.1 | HetE-N1→ TPR+GreAB-C+PIN*→ | TPR+GreAB-C+PIN | 785  | HG348_004580 | Gammaproteobacteria | Salmonella enterica subsp. enterica serovar Corvallis | hypothetical protein HG348_004580, partial [Salmonella enterica subsp. enterica serovar Corvallis]. | GCA_012407905.1 |
| EFD8840406.1 | TPR+GreAB-C+PIN*→          | TPR+GreAB-C+PIN | 342  | CO273_005362 | Gammaproteobacteria | Escherichia coli                                      | hypothetical protein CO273_005362, partial [Escherichia coli].                                      | GCA_012416985.1 |
| EFE7110517.1 | TPR+GreAB-C+PIN*→          | TPR+GreAB-C+PIN | 631  | GCY86_26975  | Gammaproteobacteria | Escherichia coli                                      | hypothetical protein GCY86_26975, partial [Escherichia coli].                                       | GCA_012449745.1 |



| acc          | operon                                 | architecture            | len  | gen.name     | taxend              | species                                            | define                                                                                           | gca             |
|--------------|----------------------------------------|-------------------------|------|--------------|---------------------|----------------------------------------------------|--------------------------------------------------------------------------------------------------|-----------------|
| EFE7435055.1 | HetE-N1→ TPR+GreAB-C+PIN*→             | TPR+GreAB-C+PIN         | 917  | F9S89_16525  | Gammaproteobacteria | Escherichia coli                                   | hypothetical protein F9S89_16525, partial [Escherichia coli].                                    | GCA_012452135.1 |
| EFE7908555.1 | TPR+GreAB-C+PIN*→                      | TPR+GreAB-C+PIN         | 1007 | F3644_26165  | Gammaproteobacteria | Escherichia coli                                   | hypothetical protein F3644_26165, partial [Escherichia coli].                                    | GCA_012454005.1 |
| EFF2139424.1 | TPR+GreAB-C+PIN*→                      | TPR+GreAB-C+PIN         | 639  | B9T00_004906 | Gammaproteobacteria | Escherichia coli                                   | hypothetical protein B9T00_004906, partial [Escherichia coli].                                   | GCA_012475085.1 |
| EFG3018646.1 | TPR+GreAB-C+PIN*→                      | TPR+GreAB-C+PIN         | 644  | BOZ88_000259 | Gammaproteobacteria | Escherichia coli                                   | hypothetical protein BOZ88_000259, partial [Escherichia coli].                                   | GCA_012551215.1 |
| EFG6909290.1 | HetE-N1→ TPR+GreAB-C+PIN*→             | TPR+GreAB-C+PIN         | 747  | BMM73_004701 | Gammaproteobacteria | Escherichia coli                                   | hypothetical protein BMM73_004701, partial [Escherichia coli].                                   | GCA_012567505.1 |
| EFH5729117.1 | GreAB-C*→                              | GreAB-C                 | 499  | GPH08_24725  | Gammaproteobacteria | Escherichia coli                                   | hypothetical protein GPH08_24725, partial [Escherichia coli].                                    | GCA_012607235.1 |
| EFK2051151.1 | HetE-N1→ TPR+GreAB-C+PIN*→             | TPR+GreAB-C+PIN         | 1094 | A8650_000222 | Gammaproteobacteria | Escherichia coli                                   | hypothetical protein A8650_000222 [Escherichia coli].                                            | GCA_012745335.1 |
| EFK2630094.1 | HetE-N1→ TPR+GreAB-C+PIN*→             | TPR+GreAB-C+PIN         | 1094 | A8611_000403 | Gammaproteobacteria | Escherichia coli                                   | hypothetical protein A8611_000403 [Escherichia coli].                                            | GCA_012750705.1 |
| EFK4277858.1 | HetE-N1→ TPR+GreAB-C+PIN*→             | TPR+GreAB-C+PIN         | 1094 | A8W36_000742 | Gammaproteobacteria | Escherichia coli                                   | hypothetical protein A8W36_000742 [Escherichia coli].                                            | GCA_012757595.1 |
| EFK5336626.1 | GreAB-C*→                              | GreAB-C                 | 296  | G5Y50_005070 | Gammaproteobacteria | Escherichia coli                                   | hypothetical protein G5Y50_005070, partial [Escherichia coli].                                   | GCA_012762195.1 |
| EFM2410662.1 | TPR+GreAB-C+PIN*→                      | TPR+GreAB-C+PIN         | 1064 | HCP88_003534 | Gammaproteobacteria | Escherichia coli                                   | hypothetical protein HCP88_003534, partial [Escherichia coli].                                   | GCA_012855135.1 |
| EFM6245585.1 | HetE-N1→ TPR+GreAB-C+PIN*→             | TPR+GreAB-C+PIN         | 1094 | G8G69_000691 | Gammaproteobacteria | Escherichia coli                                   | hypothetical protein G8G69_000691 [Escherichia coli].                                            | GCA_012890895.1 |
| EFN7425919.1 | HetE-N1→ HetE-N1+TPR+GreAB-C+PIN*→     | HetE-N1+TPR+GreAB-C+PIN | 1094 | EHR20_13780  | Gammaproteobacteria | Escherichia coli                                   | hypothetical protein EHR20_13780 [Escherichia coli].                                             | GCA_013040925.1 |
| EFO0890621.1 | GreAB-C*→                              | GreAB-C                 | 328  | DYJ49_27190  | Gammaproteobacteria | Escherichia coli                                   | hypothetical protein DYJ49_27190, partial [Escherichia coli].                                    | GCA_013061045.1 |
| EFO1176558.1 | TPR+GreAB-C+PIN*→                      | TPR+GreAB-C+PIN         | 1073 | DW520_17505  | Gammaproteobacteria | Escherichia coli                                   | hypothetical protein DW520_17505, partial [Escherichia coli].                                    | GCA_013062025.1 |
| EFS2240967.1 | HetE-N1→ TPR+GreAB-C+PIN*→             | TPR+GreAB-C+PIN         | 1094 | GTJ56_01995  | Gammaproteobacteria | Shigella sonnei                                    | hypothetical protein GTJ56_01995 [Shigella sonnei].                                              | GCA_013627075.1 |
| EFT8083545.1 | <-HTH<-PSE  HetE-N1→ TPR+GreAB-C+PIN*→ | TPR+GreAB-C+PIN         | 1107 | HVC06_002423 | Gammaproteobacteria | Salmonella enterica                                | hypothetical protein HVC06_002423 [Salmonella enterica].                                         | GCA_013717865.1 |
| EFU7164914.1 | TPR+GreAB-C+PIN*→                      | TPR+GreAB-C+PIN         | 1012 | HTZ39_004610 | Gammaproteobacteria | Escherichia coli                                   | hypothetical protein HTZ39_004610, partial [Escherichia coli].                                   | GCA_013766175.1 |
| EFW2864166.1 | TPR+GreAB-C*→                          | TPR+GreAB-C             | 440  | H3T30_004508 | Gammaproteobacteria | Salmonella enterica                                | hypothetical protein H3T30_004508, partial [Salmonella enterica].                                | GCA_013859415.1 |
| EFZ7349264.1 | HetE-N1→ TPR+GreAB-C+PIN*→             | TPR+GreAB-C+PIN         | 1094 | A8I24_003489 | Gammaproteobacteria | Shigella sonnei                                    | hypothetical protein A8I24_003489 [Shigella sonnei].                                             | GCA_014033075.1 |
| EGB9339943.1 | TPR+GreAB-C+PIN*→                      | TPR+GreAB-C+PIN         | 694  | H8Q22_004544 | Gammaproteobacteria | Salmonella enterica                                | hypothetical protein H8Q22_004544, partial [Salmonella enterica].                                | GCA_014249275.1 |
| EGF6340579.1 | GreAB-C*→                              | GreAB-C                 | 417  | IBT07_004591 | Gammaproteobacteria | Salmonella enterica subsp. enterica serovar Molade | hypothetical protein IBT07_004591, partial [Salmonella enterica subsp. enterica serovar Molade]. | GCA_014515725.1 |
| EGG4494193.1 | TPR+GreAB-C+PIN*→                      | TPR+GreAB-C+PIN         | 990  | HKL61_004648 | Gammaproteobacteria | Salmonella enterica                                | hypothetical protein HKL61_004648, partial [Salmonella enterica].                                | GCA_014566815.1 |
| EGG4638401.1 | HetE-N1→ TPR+GreAB-C+PIN*→             | TPR+GreAB-C+PIN         | 777  | HKL37_003624 | Gammaproteobacteria | Salmonella enterica                                | hypothetical protein HKL37_003624, partial [Salmonella enterica].                                | GCA_014566995.1 |
| EGG4725781.1 | HetE-N1→ TPR+GreAB-C+PIN*→             | TPR+GreAB-C+PIN         | 855  | HKE56_003805 | Gammaproteobacteria | Salmonella enterica                                | hypothetical protein HKE56_003805, partial [Salmonella enterica].                                | GCA_014566275.1 |

| acc          | operon                                  | architecture            | len  | gen.name     | taxend              | species                                                  | define                                                                                                | gca             |
|--------------|-----------------------------------------|-------------------------|------|--------------|---------------------|----------------------------------------------------------|-------------------------------------------------------------------------------------------------------|-----------------|
| EGI5600308.1 | HetE-N1→ TPR+GreAB-C+PIN*→              | TPR+GreAB-C+PIN         | 1070 | VS45_000308  | Gammaproteobacteria | Salmonella enterica subsp. enterica serovar Augustenborg | hypothetical protein VS45_000308, partial [Salmonella enterica subsp. enterica serovar Augustenborg]. | GCA_014756925.1 |
| EGI6298009.1 | HetE-N1→ TPR+GreAB-C+PIN*→              | TPR+GreAB-C+PIN         | 1117 | WB72_004704  | Gammaproteobacteria | Salmonella enterica subsp. enterica serovar Molade       | hypothetical protein WB72_004704 [Salmonella enterica subsp. enterica serovar Molade].                | GCA_014759725.1 |
| EGJ1631486.1 | <-HTH<-?<-?  HetE-N1→ TPR+GreAB-C+PIN*→ | TPR+GreAB-C+PIN         | 915  | IHG43_004265 | Gammaproteobacteria | Salmonella enterica                                      | hypothetical protein IHG43_004265, partial [Salmonella enterica].                                     | GCA_014806485.1 |
| EGJ1647992.1 | <-HTH<-?<-?  HetE-N1→ TPR+GreAB-C+PIN*→ | TPR+GreAB-C+PIN         | 1107 | IHG42_002561 | Gammaproteobacteria | Salmonella enterica                                      | hypothetical protein IHG42_002561 [Salmonella enterica].                                              | GCA_014806725.1 |
| EGK4803692.1 | TPR+GreAB-C+PIN*→                       | TPR+GreAB-C+PIN         | 879  | IOX27_004405 | Gammaproteobacteria | Salmonella enterica                                      | hypothetical protein IOX27_004405, partial [Salmonella enterica].                                     | GCA_014937925.1 |
| EGQ7796229.1 | HetE-N1→ TPR+GreAB-C+PIN*→              | TPR+GreAB-C+PIN         | 1130 | I6Z01_004778 | Gammaproteobacteria | Vibrio parahaemolyticus                                  | hypothetical protein I6Z01_004778 [Vibrio parahaemolyticus].                                          | GCA_015745865.1 |
| EGQ8097028.1 | TPR+GreAB-C+PIN*→                       | TPR+GreAB-C+PIN         | 450  | G4T96_003617 | Gammaproteobacteria | Vibrio cholerae                                          | hypothetical protein G4T96_003617, partial [Vibrio cholerae].                                         | GCA_015960365.1 |
| EGQ8394401.1 | HetE-N1→ TPR+GreAB-C+PIN*→              | TPR+GreAB-C+PIN         | 1089 | GTW12_14360  | Gammaproteobacteria | Vibrio cholerae                                          | hypothetical protein GTW12_14360 [Vibrio cholerae].                                                   | GCA_015775695.1 |
| EGR2511155.1 | HetE-N1→ HetE-N1+TPR+GreAB-C+PIN*→      | HetE-N1+TPR+GreAB-C+PIN | 1088 | DYC71_07390  | Gammaproteobacteria | Vibrio cholerae                                          | hypothetical protein DYC71_07390 [Vibrio cholerae].                                                   | GCA_015803535.1 |
| EGR2571797.1 | HetE-N1→ TPR+GreAB-C+PIN*→              | TPR+GreAB-C+PIN         | 1089 | DXI14_15890  | Gammaproteobacteria | Vibrio cholerae                                          | hypothetical protein DXI14_15890 [Vibrio cholerae].                                                   | GCA_015804695.1 |
| EGR4199274.1 | HetE-N1→ HetE-N1+TPR+GreAB-C+PIN*→      | HetE-N1+TPR+GreAB-C+PIN | 1088 | DDN79_15180  | Gammaproteobacteria | Vibrio cholerae                                          | hypothetical protein DDN79_15180 [Vibrio cholerae].                                                   | GCA_015810035.1 |
| EGR4999920.1 | HetE-N1→ HetE-N1+TPR+GreAB-C+PIN*→      | HetE-N1+TPR+GreAB-C+PIN | 1091 | C4G32_21475  | Gammaproteobacteria | Vibrio parahaemolyticus                                  | hypothetical protein C4G32_21475 [Vibrio parahaemolyticus].                                           | GCA_015814505.1 |
| EGS2470077.1 | HetE-N1→ TPR+GreAB-C+PIN*→              | TPR+GreAB-C+PIN         | 1117 | I8K59_003334 | Gammaproteobacteria | Salmonella enterica                                      | hypothetical protein I8K59_003334 [Salmonella enterica].                                              | GCA_015867645.1 |
| EGS6048781.1 | HetE-N1→ TPR+GreAB-C+PIN*→              | TPR+GreAB-C+PIN         | 998  | I4Y87_004789 | Gammaproteobacteria | Salmonella enterica subsp. enterica serovar Alachua      | hypothetical protein I4Y87_004789, partial [Salmonella enterica subsp. enterica serovar Alachua].     | GCA_015906765.1 |
| EGT0637485.1 | GreAB-C*→                               | GreAB-C                 | 478  | JAG24_004773 | Gammaproteobacteria | Citrobacter freundii                                     | hypothetical protein JAG24_004773, partial [Citrobacter freundii].                                    | GCA_015943305.1 |
| EGT3640898.1 | TPR+GreAB-C+PIN*→                       | TPR+GreAB-C+PIN         | 1067 | DFW15_03700  | Firmicutes          | Clostridioides difficile                                 | hypothetical protein DFW15_03700 [Clostridioides difficile].                                          | GCA_016071215.1 |
| EGT5618809.1 | TPR+GreAB-C+PIN*→                       | TPR+GreAB-C+PIN         | 1233 | BUL45_06960  | Firmicutes          | Clostridium perfringens                                  | tetratricopeptide repeat protein [Clostridium perfringens].                                           | GCA_016085335.1 |
| EGY6095294.1 | REase+TPR+GreAB-C+PIN*→   <-?  HTH→     | REase+TPR+GreAB-C+PIN   | 1216 | A1Z38_19500  | Gammaproteobacteria | Acinetobacter baumannii                                  | hypothetical protein A1Z38_19500 [Acinetobacter baumannii].                                           | GCA_016522135.1 |
| EGY8392823.1 | REase+TPR+GreAB-C+PIN*→   <-?  HTH→     | REase+TPR+GreAB-C+PIN   | 1216 | AXE44_13945  | Gammaproteobacteria | Acinetobacter baumannii                                  | hypothetical protein AXE44_13945 [Acinetobacter baumannii].                                           | GCA_016539145.1 |
| EHA1126835.1 | HetE-N1→ TPR+GreAB-C+PIN*→              | TPR+GreAB-C+PIN         | 1114 | FG475_17175  | Gammaproteobacteria | Vibrio navarrensis                                       | hypothetical protein FG475_17175 [Vibrio navarrensis].                                                | GCA_016611225.1 |
| EHB5819355.1 | HetE-N1→ TPR+GreAB-C+PIN*→              | TPR+GreAB-C+PIN         | 1106 | JXL86_002072 | -                   | Enterobacter hormaechei                                  | hypothetical protein JXL86_002072 [Enterobacter hormaechei].                                          | GCA_016985635.1 |
| EHB7585965.1 | HetE-N1→ TPR+GreAB-C+PIN*→              | TPR+GreAB-C+PIN         | 759  | JV429_000621 | Gammaproteobacteria | Escherichia coli                                         | hypothetical protein JV429_000621, partial [Escherichia coli].                                        | GCA_017003995.1 |
| EHB7691780.1 | TPR+GreAB-C+PIN*→                       | TPR+GreAB-C+PIN         | 745  | JV466_004427 | Gammaproteobacteria | Escherichia coli                                         | hypothetical protein JV466_004427, partial [Escherichia coli].                                        | GCA_017004675.1 |
| EHC1615065.1 | TPR+GreAB-C+PIN*→                       | TPR+GreAB-C+PIN         | 732  | JT622_005238 | Gammaproteobacteria | Escherichia coli                                         | hypothetical protein JT622_005238, partial [Escherichia coli].                                        | GCA_017029715.1 |
| EHD4655635.1 | HetE-N1→ TPR+GreAB-C+PIN*→              | TPR+GreAB-C+PIN         | 807  | JRB69_003203 | Gammaproteobacteria | Salmonella enterica                                      | hypothetical protein JRB69_003203, partial [Salmonella enterica].                                     | GCA_017143955.1 |

| acc          | operon                                    | architecture            | len  | gen.name     | taxend              | species                                               | define                                                                                              | gca             |
|--------------|-------------------------------------------|-------------------------|------|--------------|---------------------|-------------------------------------------------------|-----------------------------------------------------------------------------------------------------|-----------------|
| EHD4703897.1 | GreAB-C*→                                 | GreAB-C                 | 419  | JRB68_004676 | Gammaproteobacteria | Salmonella enterica                                   | hypothetical protein JRB68_004676, partial [Salmonella enterica].                                   | GCA_017144295.1 |
| EHD5811550.1 | TPR+GreAB-C+PIN*→                         | TPR+GreAB-C+PIN         | 628  | JQZ13_004415 | Gammaproteobacteria | Escherichia coli                                      | hypothetical protein JQZ13_004415, partial [Escherichia coli].                                      | GCA_017158335.1 |
| EHD6029608.1 | HetE-N1→ TPR+GreAB-C+PIN*→                | TPR+GreAB-C+PIN         | 1085 | JQ325_002365 | Gammaproteobacteria | Vibrio parahaemolyticus                               | hypothetical protein JQ325_002365 [Vibrio parahaemolyticus].                                        | GCA_017160295.1 |
| EHF0016324.1 | ?*→                                       | ?                       | 690  | IFX66_005031 | Gammaproteobacteria | Escherichia coli                                      | hypothetical protein IFX66_005031, partial [Escherichia coli].                                      | GCA_017278275.1 |
| EHG1523212.1 | TPR+GreAB-C+PIN*→                         | TPR+GreAB-C+PIN         | 1001 | J1L78_003684 | Gammaproteobacteria | Salmonella enterica subsp. enterica serovar Corvallis | hypothetical protein J1L78_003684, partial [Salmonella enterica subsp. enterica serovar Corvallis]. | GCA_017373035.1 |
| EHG6154572.1 | HetE-N1→ TPR+GreAB-C+PIN*→                | TPR+GreAB-C+PIN         | 1094 | J5T29_002362 | Gammaproteobacteria | Escherichia fergusonii                                | hypothetical protein J5T29_002362 [Escherichia fergusonii].                                         | GCA_017528445.1 |
| EHG8446233.1 | HetE-N1→ TPR+GreAB-C+PIN*→                | TPR+GreAB-C+PIN         | 1106 | J6D68_002379 | Gammaproteobacteria | Salmonella enterica subsp. enterica                   | hypothetical protein J6D68_002379 [Salmonella enterica subsp. enterica].                            | GCA_017573985.1 |
| EHH5222655.1 | TPR+GreAB-C+PIN*→                         | TPR+GreAB-C+PIN         | 630  | J6876_004216 | Gammaproteobacteria | Escherichia coli                                      | hypothetical protein J6876_004216, partial [Escherichia coli].                                      | GCA_017685995.1 |
| EHH5972888.1 | TPR+GreAB-C+PIN*→                         | TPR+GreAB-C+PIN         | 1039 | J8O14_004858 | Gammaproteobacteria | Salmonella enterica subsp. enterica serovar Alachua   | hypothetical protein J8O14_004858, partial [Salmonella enterica subsp. enterica serovar Alachua].   | GCA_017690295.1 |
| EHH6676921.1 | HetE-N1→ TPR+GreAB-C+PIN*→                | TPR+GreAB-C+PIN         | 1094 | J6H48_001187 | Gammaproteobacteria | Escherichia coli                                      | hypothetical protein J6H48_001187 [Escherichia coli].                                               | GCA_017723775.1 |
| EHH7564006.1 | TPR+GreAB-C+PIN*→                         | TPR+GreAB-C+PIN         | 1015 | J5J30_004554 | Gammaproteobacteria | Escherichia coli                                      | hypothetical protein J5J30_004554, partial [Escherichia coli].                                      | GCA_017727775.1 |
| EHH7810630.1 | GreAB-C*→                                 | GreAB-C                 | 318  | J5B41_005221 | Gammaproteobacteria | Escherichia coli                                      | hypothetical protein J5B41_005221, partial [Escherichia coli].                                      | GCA_017733975.1 |
| EHI0937798.1 | TPR+GreAB-C+PIN*→                         | TPR+GreAB-C+PIN         | 636  | J1A00_004749 | Gammaproteobacteria | Escherichia coli                                      | hypothetical protein J1A00_004749, partial [Escherichia coli].                                      | GCA_017780845.1 |
| EHI2008363.1 | TPR+GreAB-C+PIN*→                         | TPR+GreAB-C+PIN         | 694  | J9U59_004724 | Gammaproteobacteria | Salmonella enterica                                   | hypothetical protein J9U59_004724, partial [Salmonella enterica].                                   | GCA_017791685.1 |
| EHI3384480.1 | TPR+GreAB-C+PIN*→                         | TPR+GreAB-C+PIN         | 747  | J9U04_004755 | Gammaproteobacteria | Salmonella enterica                                   | hypothetical protein J9U04_004755, partial [Salmonella enterica].                                   | GCA_017798465.1 |
| EHI3712656.1 | TPR+GreAB-C+PIN*→                         | TPR+GreAB-C+PIN         | 723  | J9T76_004561 | Gammaproteobacteria | Salmonella enterica                                   | hypothetical protein J9T76_004561, partial [Salmonella enterica].                                   | GCA_017800075.1 |
| EHI5184709.1 | TPR+GreAB-C+PIN*→                         | TPR+GreAB-C+PIN         | 999  | J9014_004542 | Gammaproteobacteria | Salmonella enterica                                   | hypothetical protein J9014_004542, partial [Salmonella enterica].                                   | GCA_017806615.1 |
| EHI6070991.1 | HetE-N1→ TPR+GreAB-C+PIN*→                | TPR+GreAB-C+PIN         | 984  | J9J70_003931 | Gammaproteobacteria | Salmonella enterica                                   | hypothetical protein J9J70_003931, partial [Salmonella enterica].                                   | GCA_017810795.1 |
| EHI8244355.1 | HetE-N1→ TPR+GreAB-C+PIN*→                | TPR+GreAB-C+PIN         | 784  | J9M94_004032 | Gammaproteobacteria | Salmonella enterica                                   | hypothetical protein J9M94_004032, partial [Salmonella enterica].                                   | GCA_017828575.1 |
| EHI9713257.1 | TPR+GreAB-C+PIN*→                         | TPR+GreAB-C+PIN         | 735  | J9T07_004736 | Gammaproteobacteria | Salmonella enterica                                   | hypothetical protein J9T07_004736, partial [Salmonella enterica].                                   | GCA_017836875.1 |
| EHJ6284301.1 | <-HTH<-?<-PSE  HetE-N1→ TPR+GreAB-C+PIN*→ | TPR+GreAB-C+PIN         | 1106 | KAM53_001182 | Gammaproteobacteria | Salmonella enterica                                   | hypothetical protein KAM53_001182 [Salmonella enterica].                                            | GCA_017922215.1 |
| EHJ8153220.1 | TPR+GreAB-C+PIN*→                         | TPR+GreAB-C+PIN         | 707  | KB264_004740 | Gammaproteobacteria | Escherichia coli                                      | hypothetical protein KB264_004740, partial [Escherichia coli].                                      | GCA_017943665.1 |
| EHJ9993052.1 | HetE-N1→ TPR+GreAB-C+PIN*→                | TPR+GreAB-C+PIN         | 1085 | KB972_002278 | Gammaproteobacteria | Vibrio parahaemolyticus                               | hypothetical protein KB972_002278 [Vibrio parahaemolyticus].                                        | GCA_017968025.1 |
| EHK2882579.1 | HetE-N1→ HetE-N1+TPR+GreAB-C+PIN*→        | HetE-N1+TPR+GreAB-C+PIN | 1091 | J7H88_002175 | Gammaproteobacteria | Vibrio parahaemolyticus                               | hypothetical protein J7H88_002175 [Vibrio parahaemolyticus].                                        | GCA_018017275.1 |
| EHL5831134.1 | HetE-N1→ TPR+GreAB-C+PIN*→                | TPR+GreAB-C+PIN         | 1117 | KEB97_001561 | Gammaproteobacteria | Salmonella enterica                                   | hypothetical protein KEB97_001561 [Salmonella enterica].                                            | GCA_018132225.1 |

| acc        | operon                                                               | architecture            | len  | gen.name          | taxend                | species                                        | define                                                                                 | gca             |
|------------|----------------------------------------------------------------------|-------------------------|------|-------------------|-----------------------|------------------------------------------------|----------------------------------------------------------------------------------------|-----------------|
| EKD28835.1 | TPR+GreAB-C+PIN*→                                                    | TPR+GreAB-C+PIN         | 1282 | ACD_79C00188G0006 | environmental samples | uncultured bacterium                           | MAG: hypothetical protein ACD_79C00188G0006 [uncultured bacterium].                    | GCA_000299275.1 |
| EKM26807.1 | HetE-N1→ TPR+GreAB-C+PIN*→                                           | TPR+GreAB-C+PIN         | 1091 | VCHENC03_4410     | Gammaproteobacteria   | Vibrio sp. HENC-03                             | hypothetical protein VCHENC03_4410 [Vibrio sp. HENC-03].                               | GCA_000305755.2 |
| ENE18425.1 | GreAB-C*→                                                            | GreAB-C                 | 334  | ECP03047993_5652  | Gammaproteobacteria   | Escherichia coli P0304799.3                    | hypothetical protein ECP03047993_5652, partial [Escherichia coli P0304799.3].          | GCA_000357685.2 |
| ENV19736.1 | HetE-N1→?→?→ GreAB-C+PIN*→                                           | GreAB-C+PIN             | 553  | F963_04374        | Gammaproteobacteria   | Acinetobacter bereziniae NIPH 3                | hypothetical protein F963_04374 [Acinetobacter bereziniae NIPH 3].                     | GCA_000368505.1 |
| EOS47428.1 | HNH→?→?→ TPR+GreAB-C+PIN*→                                           | TPR+GreAB-C+PIN         | 1071 | C809_02304        | Firmicutes            | Lachnospiraceae bacterium MD335                | hypothetical protein C809_02304 [Lachnospiraceae bacterium MD335].                     | GCA_000403335.2 |
| ERS81691.1 | TPR+GreAB-C+PIN*→                                                    | TPR+GreAB-C+PIN         | 480  | Q672_10295        | Gammaproteobacteria   | Marinobacter sp. EVN1                          | hypothetical protein Q672_10295 [Marinobacter sp. EVN1].                               | GCA_000475375.1 |
| ERU60319.1 | DOC+HTH→ REase+TOPC→?→ HetE-N1→ HetE-N1+TPR+GreAB-C+PIN*→            | HetE-N1+TPR+GreAB-C+PIN | 1126 | Q088_04776        | Gammaproteobacteria   | Pseudomonas aeruginosa C41                     | hypothetical protein Q088_04776 [Pseudomonas aeruginosa C41].                          | GCA_000480455.1 |
| ETK41841.1 | REase+TPR+GreAB-C+PIN*→                                              | REase+TPR+GreAB-C+PIN   | 1486 | H098_09645        | Gammaproteobacteria   | Pseudomonas fluorescens FH5                    | hypothetical protein H098_09645 [Pseudomonas fluorescens FH5].                         | GCA_000511155.2 |
| EWS54147.1 | REase+TPR→ TPR+GreAB-C+PIN*→                                         | TPR+GreAB-C+PIN         | 1054 | X551_03051        | Betaproteobacteria    | Methylibium sp. T29                            | hypothetical protein X551_03051 [Methylibium sp. T29].                                 | GCA_000576205.1 |
| EXI84113.1 | REase+TPR+GreAB-C+PIN*→                                              | REase+TPR+GreAB-C+PIN   | 1363 | AW11_03978        | Betaproteobacteria    | Candidatus Accumulibacter sp. BA-93            | MAG: hypothetical protein AW11_03978 [Candidatus Accumulibacter sp. BA-93].            | GCA_000585075.1 |
| EXU80592.1 | REase+TPR+GreAB-C+PIN*→                                              | REase+TPR+GreAB-C+PIN   | 1391 | AX13_15135        | Betaproteobacteria    | Comamonas aquatica DA1877                      | hypothetical protein AX13_15135 [Comamonas aquatica DA1877].                           | GCA_000590985.1 |
| GAC55419.1 | TPR+PIN*→                                                            | TPR+PIN                 | 1183 | GOAMI_53_00020    | Actinobacteria        | Gordonia amicalis NBRC 100051 = JCM 11271      | hypothetical protein GOAMI_53_00020 [Gordonia amicalis NBRC 100051 = JCM 11271].       | GCA_000332995.1 |
| GAF05793.1 | TPR+GreAB-C+PIN*→                                                    | TPR+GreAB-C+PIN         | 524  | JCM21142_104546   | Bacteroidetes         | Saccharicrinis fermentans DSM 9555 = JCM 21142 | hypothetical protein JCM21142_104546 [Saccharicrinis fermentans DSM 9555 = JCM 21142]. | GCA_000583675.1 |
| GBF59066.1 | REase+TPR+GreAB-C+PIN*→                                              | REase+TPR+GreAB-C+PIN   | 1327 | bepA_7            | Alphaproteobacteria   | Candidatus Phycosocius bacilliformis           | beta-barrel assembly-enhancing protease [Candidatus Phycosocius bacilliformis].        | GCA_003112735.1 |
| GBH08795.1 | HetE-N1→   <-?  HetE-N1+TPR+GreAB-C+PIN→   <-?<-?  TPR+GreAB-C+PIN*→ | TPR+GreAB-C+PIN         | 953  | KPSA1_02176       | Gammaproteobacteria   | Pseudomonas syringae pv. actinidiae            | ATP-dependent exoDNase beta subunit [Pseudomonas syringae pv. actinidiae].             | GCA_003202975.1 |
| GBH17945.1 | REase+TPR+GreAB-C+PIN*→?→ REase+nSTAND3→ REase+nSTAND3→              | REase+TPR+GreAB-C+PIN   | 1491 | KPSA3_03922       | Gammaproteobacteria   | Pseudomonas syringae pv. actinidiae            | Tetratricopeptide repeat [Pseudomonas syringae pv. actinidiae].                        | GCA_003202995.1 |
| GBU16512.1 | TPR+GreAB-C+PIN*→                                                    | TPR+GreAB-C+PIN         | 1107 | AwMethylo_07270   | Alphaproteobacteria   | Methylobacterium sp.                           | hypothetical protein AwMethylo_07270 [Methylobacterium sp.].                           | GCA_003864615.1 |
| GCL65539.1 | REase+TPR+GreAB-C+PIN*→                                              | REase+TPR+GreAB-C+PIN   | 1455 | AQPW35_46200      | Betaproteobacteria    | Aquabacterium pictum                           | hypothetical protein AQPW35_46200 [Aquabacterium pictum].                              | GCA_005403045.1 |
| GCM29814.1 | TPR+GreAB-C+PIN*→                                                    | TPR+GreAB-C+PIN         | 622  | ExPECSC050_01644  | Gammaproteobacteria   | Escherichia coli                               | hypothetical protein ExPECSC050_01644 [Escherichia coli].                              | GCA_005383045.1 |
| GFJ77328.1 | TM+TPR+PIN*→ REase→                                                  | TM+TPR+PIN              | 1362 | Phou_015080       | Actinobacteria        | Phytohabitans houttuyniae                      | hypothetical protein Phou_015080 [Phytohabitans houttuyniae].                          | GCA_011764425.1 |
| GGJ71040.1 | TPR+PIN*→                                                            | TPR+PIN                 | 1223 | GCM10012282_79870 | Actinobacteria        | Streptomyces lacrimifluminis                   | hypothetical protein GCM10012282_79870 [Streptomyces lacrimifluminis].                 | GCA_014646095.1 |
| GGK48292.1 | HetE-N1→ TPR+GreAB-C+PIN*→                                           | TPR+GreAB-C+PIN         | 1120 | GCM10009103_48460 | Gammaproteobacteria   | Pseudomonas koreensis                          | hypothetical protein GCM10009103_48460 [Pseudomonas koreensis].                        | GCA_014646955.1 |
| GGR17482.1 | REase+TPR+GreAB-C+PIN*→                                              | REase+TPR+GreAB-C+PIN   | 1357 | GCM10008957_32760 | Deinococci            | Deinococcus ruber                              | hypothetical protein GCM10008957_32760 [Deinococcus ruber].                            | GCA_014648095.1 |
| GGZ02836.1 | HetE-N1→?→ GreAB-C*→                                                 | GreAB-C                 | 451  | GCM10007169_19550 | Gammaproteobacteria   | Shewanella fodinae                             | hypothetical protein GCM10007169_19550 [Shewanella fodinae].                           | GCA_014651955.1 |
| GHB08256.1 | HetE-N1→ TPR+GreAB-C+PIN*→                                           | TPR+GreAB-C+PIN         | 1025 | GCM10007107_21780 | Gammaproteobacteria   | Shewanella indica                              | hypothetical protein GCM10007107_21780 [Shewanella indica].                            | GCA_014652115.1 |

| acc          | operon                                        | architecture            | len  | gen.name         | taxend              | species                     | define                                                                  | gca             |
|--------------|-----------------------------------------------|-------------------------|------|------------------|---------------------|-----------------------------|-------------------------------------------------------------------------|-----------------|
| GIE51569.1   | TPR+PIN→?→?→ PIN*→    <-?<-? AbiJ-NTD3+REase→ | PIN                     | 177  | Ani05nite_51030  | Actinobacteria      | Actinoplanes nipponensis    | hypothetical protein Ani05nite_51030 [Actinoplanes nipponensis].        | GCA_016862275.1 |
| GIG67348.1   | TM+TPR+PIN*→                                  | TM+TPR+PIN              | 1072 | Pen01_36430      | Actinobacteria      | Phytomonospora endophytica  | hypothetical protein Pen01_36430 [Phytomonospora endophytica].          | GCA_016862855.1 |
| GIJ10564.1   | REase+TPR+GreAB-C+PIN*→                       | REase+TPR+GreAB-C+PIN   | 1377 | Van01_37780      | Actinobacteria      | Micromonospora andamanensis | hypothetical protein Van01_37780 [Micromonospora andamanensis].         | GCA_016863495.1 |
| GIM80122.1   | REase+TPR+GreAB-C+PIN*→                       | REase+TPR+GreAB-C+PIN   | 1253 | Aau02nite_89080  | Actinobacteria      | Actinoplanes auranticolor   | hypothetical protein Aau02nite_89080 [Actinoplanes auranticolor].       | GCA_018332655.1 |
| GIM97804.1   | TPR+PIN*→                                     | TPR+PIN                 | 1137 | Ato02nite_095970 | Actinobacteria      | Actinoplanes toevensis      | hypothetical protein Ato02nite_095970 [Actinoplanes toevensis].         | GCA_018332695.1 |
| HAF5476147.1 | HetE-N1→ TPR+GreAB-C+PIN*→                    | TPR+GreAB-C+PIN         | 1117 | G8A91_001303     | Gammaproteobacteria | Salmonella enterica         | TPA: hypothetical protein G8A91_001303 [Salmonella enterica].           | GCA_011304215.1 |
| HAH9826030.1 | HetE-N1→ TPR+GreAB-C+PIN*→                    | TPR+GreAB-C+PIN         | 986  | HIF24_22945      | Gammaproteobacteria | Escherichia coli            | TPA: hypothetical protein HIF24_22945, partial [Escherichia coli].      | GCA_012753875.1 |
| HAK4911912.1 | HetE-N1→ TPR+GreAB-C+PIN*→                    | TPR+GreAB-C+PIN         | 1117 | H2B38_003821     | Gammaproteobacteria | Salmonella enterica         | TPA: hypothetical protein H2B38_003821 [Salmonella enterica].           | GCA_013572415.1 |
| HAK9873068.1 | TPR+GreAB-C+PIN*→                             | TPR+GreAB-C+PIN         | 1028 | H3L74_004566     | Gammaproteobacteria | Escherichia coli            | TPA: hypothetical protein H3L74_004566, partial [Escherichia coli].     | GCA_013794255.1 |
| HAL9130497.1 | HetE-N1→ TPR+GreAB-C+PIN*→                    | TPR+GreAB-C+PIN         | 1094 | H7U58_003240     | Gammaproteobacteria | Escherichia coli            | TPA: hypothetical protein H7U58_003240 [Escherichia coli].              | GCA_014184975.1 |
| HAL9453557.1 | GreAB-C*→                                     | GreAB-C                 | 337  | H7V29_005028     | Gammaproteobacteria | Escherichia coli            | TPA: hypothetical protein H7V29_005028, partial [Escherichia coli].     | GCA_014186535.1 |
| HAM4053647.1 | HetE-N1→ TPR+GreAB-C+PIN*→                    | TPR+GreAB-C+PIN         | 1094 | IBV36_002404     | Gammaproteobacteria | Escherichia coli            | TPA: hypothetical protein IBV36_002404 [Escherichia coli].              | GCA_014461175.1 |
| HAM8943229.1 | HetE-N1→ TPR+GreAB-C+PIN*→                    | TPR+GreAB-C+PIN         | 618  | IDX96_004717     | Gammaproteobacteria | Escherichia coli            | TPA: hypothetical protein IDX96_004717, partial [Escherichia coli].     | GCA_014571125.1 |
| HAM8943373.1 | TPR+GreAB-C+PIN*→                             | TPR+GreAB-C+PIN         | 474  | IDX96_004882     | Gammaproteobacteria | Escherichia coli            | TPA: hypothetical protein IDX96_004882, partial [Escherichia coli].     | GCA_014571125.1 |
| HAM8966916.1 | HetE-N1→ TPR+GreAB-C+PIN*→                    | TPR+GreAB-C+PIN         | 1094 | IDX85_003830     | Gammaproteobacteria | Escherichia coli            | TPA: hypothetical protein IDX85_003830 [Escherichia coli].              | GCA_014573095.1 |
| HAM8991159.1 | HetE-N1→ TPR+GreAB-C+PIN*→                    | TPR+GreAB-C+PIN         | 1094 | IDX80_003853     | Gammaproteobacteria | Escherichia coli            | TPA: hypothetical protein IDX80_003853 [Escherichia coli].              | GCA_014573135.1 |
| HAN3697638.1 | TPR+GreAB-C+PIN*→                             | TPR+GreAB-C+PIN         | 1050 | IE973_004718     | Gammaproteobacteria | Escherichia coli            | TPA: hypothetical protein IE973_004718, partial [Escherichia coli].     | GCA_014687295.1 |
| HAN4834938.1 | HetE-N1→ TPR+GreAB-C+PIN*→                    | TPR+GreAB-C+PIN         | 1094 | IFD90_003495     | Gammaproteobacteria | Escherichia coli            | TPA: hypothetical protein IFD90_003495 [Escherichia coli].              | GCA_014683685.1 |
| HAN6118733.1 | HetE-N1→ TPR+GreAB-C+PIN*→                    | TPR+GreAB-C+PIN         | 1094 | IFZ61_002838     | Gammaproteobacteria | Escherichia coli            | TPA: hypothetical protein IFZ61_002838 [Escherichia coli].              | GCA_014708655.1 |
| HAN7634134.1 | GreAB-C*→                                     | GreAB-C                 | 447  | IF647_005249     | Gammaproteobacteria | Escherichia coli            | TPA: hypothetical protein IF647_005249, partial [Escherichia coli].     | GCA_014724455.1 |
| HAO1938999.1 | HetE-N1→ TPR+GreAB-C+PIN*→                    | TPR+GreAB-C+PIN         | 1094 | IHJ42_000411     | Gammaproteobacteria | Escherichia coli            | TPA: hypothetical protein IHJ42_000411 [Escherichia coli].              | GCA_014815885.1 |
| HAS1413650.1 | TPR+GreAB-C+PIN*→                             | TPR+GreAB-C+PIN         | 845  | I4D28_09180      | Gammaproteobacteria | Enterobacter hormaechei     | TPA: hypothetical protein I4D28_09180 [Enterobacter hormaechei].        | -               |
| HAT2286137.1 | HetE-N1→ TPR+GreAB-C+PIN+TM+TM*→              | TPR+GreAB-C+PIN+TM+TM   | 1106 | I8156_002891     | Gammaproteobacteria | Citrobacter freundii        | TPA: hypothetical protein I8156_002891 [Citrobacter freundii].          | GCA_015897485.1 |
| HAT3687084.1 | HetE-N1→ TPR+GreAB-C+PIN*→                    | TPR+GreAB-C+PIN         | 958  | I8574_002665     | Gammaproteobacteria | Citrobacter freundii        | TPA: hypothetical protein I8574_002665, partial [Citrobacter freundii]. | GCA_015902705.1 |
| HAT3994325.1 | TPR+GreAB-C+PIN*→                             | TPR+GreAB-C+PIN         | 1131 | I9Y74_003743     | Bacteroidetes       | Elizabethkingia anophelis   | TPA: hypothetical protein I9Y74_003743 [Elizabethkingia anophelis].     | GCA_015930145.1 |
| HAT8488811.1 | HetE-N1→ HetE-N1+TPR+GreAB-C+PIN*→            | HetE-N1+TPR+GreAB-C+PIN | 1088 | I7187_21710      | Gammaproteobacteria | Vibrio vulnificus           | TPA: hypothetical protein I7187_21710 [Vibrio vulnificus].              | GCA_015968635.1 |

| acc          | operon                                      | architecture                | len  | gen.name     | taxend                | species                                      | define                                                                                          | gca             |
|--------------|---------------------------------------------|-----------------------------|------|--------------|-----------------------|----------------------------------------------|-------------------------------------------------------------------------------------------------|-----------------|
| HAU8300026.1 | HetE-N1→ TPR+GreAB-C+PIN*→                  | TPR+GreAB-C+PIN             | 1130 | I7159_21955  | Gammaproteobacteria   | Vibrio vulnificus                            | TPA: hypothetical protein I7159_21955 [Vibrio vulnificus].                                      | GCA_016110185.1 |
| HAU9261412.1 | HetE-N1→ TPR+GreAB-C+PIN*→                  | TPR+GreAB-C+PIN             | 1094 | JEX66_004253 | Gammaproteobacteria   | Escherichia coli                             | TPA: hypothetical protein JEX66_004253 [Escherichia coli].                                      | GCA_016116905.1 |
| HAV13598.1   | GreAB*→                                     | GreAB                       | 620  | DCX06_08945  | Verrucomicrobia       | Opirituae bacterium                          | MAG TPA: transcription elongation factor GreAB [Opirituae bacterium].                           | GCA_003485085.1 |
| HAV1378302.1 | HetE-N1→ NACHT+GreAB-C+PIN*→                | NACHT+GreAB-C+PIN           | 1085 | JG804_003376 | Gammaproteobacteria   | Vibrio parahaemolyticus                      | TPA: hypothetical protein JG804_003376 [Vibrio parahaemolyticus].                               | GCA_016429865.1 |
| HAV1873259.1 | TPR+GreAB-C+PIN*→                           | TPR+GreAB-C+PIN             | 742  | JG951_004564 | Gammaproteobacteria   | Enterobacter hormaechei subsp. steigerwaltii | TPA: hypothetical protein JG951_004564, partial [Enterobacter hormaechei subsp. steigerwaltii]. | GCA_016431145.1 |
| HAV7695504.1 | HetE-N1→ TPR+GreAB-C+PIN*→                  | TPR+GreAB-C+PIN             | 1094 | JK751_001166 | Gammaproteobacteria   | Escherichia coli                             | TPA: hypothetical protein JK751_001166 [Escherichia coli].                                      | GCA_016656125.1 |
| HAV9376548.1 | TPR+GreAB-C+PIN*→                           | TPR+GreAB-C+PIN             | 575  | JLF84_000973 | Gammaproteobacteria   | Escherichia coli                             | TPA: hypothetical protein JLF84_000973 [Escherichia coli].                                      | GCA_016665225.1 |
| HAW2926691.1 | HetE-N1→ TPR+GreAB-C+PIN*→                  | TPR+GreAB-C+PIN             | 1094 | JLR28_003506 | Gammaproteobacteria   | Escherichia coli                             | TPA: hypothetical protein JLR28_003506 [Escherichia coli].                                      | GCA_016681635.1 |
| HAW5283885.1 | HetE-N1→ TPR+GreAB-C+PIN*→                  | TPR+GreAB-C+PIN             | 1094 | JLY51_001282 | Gammaproteobacteria   | Escherichia coli                             | TPA: hypothetical protein JLY51_001282 [Escherichia coli].                                      | GCA_016693495.1 |
| HAW6997627.1 | REase+TPR+GreAB-C+PIN*→                     | REase+TPR+GreAB-C+PIN       | 1250 | JIR16_12805  | Gammaproteobacteria   | Acinetobacter baumannii                      | TPA: hypothetical protein JIR16_12805 [Acinetobacter baumannii].                                | GCA_016844125.1 |
| HAY34439.1   | TPR+GreAB-C+PIN*→                           | TPR+GreAB-C+PIN             | 1108 | DCY06_09910  | Bacteroidetes         | Bacteroidetes bacterium                      | MAG TPA: hypothetical protein DCY06_09910 [Bacteroidetes bacterium].                            | GCA_003486905.1 |
| HBA3776861.1 | TPR+GreAB-C+PIN*→                           | TPR+GreAB-C+PIN             | 1117 | J5F89_004850 | Gammaproteobacteria   | Escherichia coli                             | TPA: hypothetical protein J5F89_004850 [Escherichia coli].                                      | GCA_017730375.1 |
| HBC0128974.1 | TPR+GreAB-C+PIN*→                           | TPR+GreAB-C+PIN             | 661  | JES91_004961 | Gammaproteobacteria   | Salmonella enterica subsp. enterica          | TPA: hypothetical protein JES91_004961, partial [Salmonella enterica subsp. enterica].          | GCA_018032925.1 |
| HBC3987585.1 | HetE-N1→ TPR+GreAB-C+PIN*→                  | TPR+GreAB-C+PIN             | 1130 | KD867_004179 | Gammaproteobacteria   | Vibrio parahaemolyticus                      | TPA: hypothetical protein KD867_004179 [Vibrio parahaemolyticus].                               | GCA_018126825.1 |
| HBJ33554.1   | TPR+GreAB-C+PIN*→                           | TPR+GreAB-C+PIN             | 857  | DDZ51_02100  | Planctomycetes        | Planctomycetaceae bacterium                  | MAG TPA: hypothetical protein DDZ51_02100, partial [Planctomycetaceae bacterium].               | GCA_003506095.1 |
| HBX77020.1   | X+PIN*→                                     | X+PIN                       | 940  | DEG43_05200  | Actinobacteria        | Acidimicrobiaceae bacterium                  | MAG TPA: hypothetical protein DEG43_05200 [Acidimicrobiaceae bacterium].                        | GCA_003514205.1 |
| HCD05045.1   | HetE-N1→?→ TPR+GreAB-C+PIN*→   <-REase+UvrD | TPR+GreAB-C+PIN             | 841  | DEQ60_06940  | Gammaproteobacteria   | Methylophaga sp.                             | MAG TPA: hypothetical protein DEQ60_06940, partial [Methylophaga sp.].                          | GCA_003517125.1 |
| HCG03150.1   | REase+TPR+GreAB-C+PIN*→                     | REase+TPR+GreAB-C+PIN       | 1325 | DEV93_21745  | Chloroflexi           | Chloroflexi bacterium                        | MAG TPA: hypothetical protein DEV93_21745 [Chloroflexi bacterium].                              | GCA_003530725.1 |
| HCN10799.1   | HTH→?→?→?→?→?→ TPR+GreAB-C+PIN*→            | TPR+GreAB-C+PIN             | 1128 | DIS75_00410  | Bacteroidetes         | Chryseobacterium sp.                         | MAG TPA: hypothetical protein DIS75_00410 [Chryseobacterium sp.].                               | GCA_003536155.1 |
| HEE61010.1   | GreAB*→                                     | GreAB                       | 217  | ENP71_13075  | Chloroflexi           | Chloroflexi bacterium                        | MAG TPA: transcription elongation factor GreA [Chloroflexi bacterium].                          | GCA_011051445.1 |
| HEN27530.1   | PIN*→                                       | PIN                         | 194  | ENQ77_02470  | Bacteria              | candidate division WOR-3 bacterium           | MAG TPA: RNA ligase partner protein [candidate division WOR-3 bacterium].                       | GCA_011046955.1 |
| HPX16357.1   | REase+TPR+GreAB-C+PIN*→                     | REase+TPR+GreAB-C+PIN       | 1269 | ENW10_10035  | unclassified Bacteria | bacterium                                    | MAG TPA: hypothetical protein ENW10_10035 [bacterium].                                          | GCA_011334465.1 |
| HGB35656.1   | PIN*→                                       | PIN                         | 194  | ENV38_01955  | Bacteria              | candidate division WOR-3 bacterium           | MAG TPA: RNA ligase partner protein [candidate division WOR-3 bacterium].                       | GCA_011338235.1 |
| HGZ37950.1   | Calcineurin+TPR+GreAB-C+PIN*→               | Calcineurin+TPR+GreAB-C+PIN | 1423 | ENR19_05950  | Nitrospirae           | Nitrospirae bacterium                        | MAG TPA: hypothetical protein ENR19_05950, partial [Nitrospirae bacterium].                     | GCA_011331925.1 |
| HHC78382.1   | TPR+GreAB-C+PIN*→                           | TPR+GreAB-C+PIN             | 1134 | ENK46_00760  | Bacteroidetes         | Flavobacteriia bacterium                     | MAG TPA: hypothetical protein ENK46_00760 [Flavobacteriia bacterium].                           | GCA_011330545.1 |
| HIB63801.1   | TPR+GreAB-C+PIN*→                           | TPR+GreAB-C+PIN             | 1486 | EYO33_01435  | Planctomycetes        | Phycisphaerales bacterium                    | MAG TPA: hypothetical protein EYO33_01435 [Phycisphaerales bacterium].                          | GCA_012964585.1 |

| acc          | operon                       | architecture               | len  | gen.name      | taxend              | species                                      | define                                                                                 | gca             |
|--------------|------------------------------|----------------------------|------|---------------|---------------------|----------------------------------------------|----------------------------------------------------------------------------------------|-----------------|
| HIP26815.1   | TPR+GreAB-C+PIN*→            | TPR+GreAB-C+PIN            | 1038 | EYG80_04080   | Bacteroidetes       | Flavobacteriaceae bacterium                  | MAG TPA: tetratricopeptide repeat protein [Flavobacteriaceae bacterium].               | GCA_015662995.1 |
| KAA0086698.1 | TPR+PIN*→                    | TPR+PIN                    | 1159 | CIW52_01945   | Actinobacteria      | Mycolicibacterium sp. P9-64                  | hypothetical protein CIW52_01945 [Mycolicibacterium sp. P9-64].                        | GCA_008329605.1 |
| KAB1070169.1 | TPR+GreAB-C+PIN*→            | TPR+GreAB-C+PIN            | 641  | F6X53_30340   | Alphaproteobacteria | Methylobacterium soli                        | tetratricopeptide repeat protein [Methylobacterium soli].                              | GCA_008806385.1 |
| KCZ93824.1   | TPR+GreAB-C+PIN*→            | TPR+GreAB-C+PIN            | 1142 | HJO_00570     | Alphaproteobacteria | Hyphomonas johnsonii MHS-2                   | hypothetical protein HJO_00570 [Hyphomonas johnsonii MHS-2].                           | GCA_000685275.1 |
| KGF68042.1   | REase+TPR+GreAB-C+PIN*→      | REase+TPR+GreAB-C+PIN      | 1283 | LL06_18825    | Alphaproteobacteria | Hoeflea sp. BAL378                           | hypothetical protein LL06_18825 [Hoeflea sp. BAL378].                                  | GCA_000759435.1 |
| KGM47444.1   | REase+TPR+GreAB-C+PIN*→      | REase+TPR+GreAB-C+PIN      | 1329 | ATO9_17580    | Alphaproteobacteria | Pseudoceanicola atlanticus                   | hypothetical protein ATO9_17580 [Pseudoceanicola atlanticus].                          | GCA_000768315.1 |
| KGS12485.1   | GreAB-C+PIN*→                | GreAB-C+PIN                | 509  | OA77_21590    | Gammaproteobacteria | Pseudomonas coronafaciens                    | hypothetical protein OA77_21590, partial [Pseudomonas coronafaciens].                  | GCA_000773135.1 |
| KHO23731.1   | X+PIN*→                      | X+PIN                      | 762  | QQ44_16085    | Actinobacteria      | Mycolicibacterium setense                    | hypothetical protein QQ44_16085 [Mycolicibacterium setense].                           | GCA_000805375.1 |
| KIF65994.1   | REase+TPR+TPR+GreAB-C+PIN*→  | REase+TPR+TPR+GreAB-C+PIN  | 1274 | HY68_38205    | Actinobacteria      | Streptomyces sp. AcH 505                     | hypothetical protein HY68_38205 [Streptomyces sp. AcH 505].                            | GCA_000818175.1 |
| KIU53353.1   | REase+TPR+TPR+GreAB-C+PIN*→  | REase+TPR+TPR+GreAB-C+PIN  | 1254 | QU41_01355    | Alphaproteobacteria | Bradyrhizobium elkanii                       | hypothetical protein QU41_01355 [Bradyrhizobium elkanii].                              | GCA_000878305.1 |
| KJS28984.1   | TPR+GreAB-C+PIN*→            | TPR+GreAB-C+PIN            | 1318 | VR64_22320    | Deltaproteobacteria | Desulfatitaea sp. BRH_c12                    | MAG: hypothetical protein VR64_22320 [Desulfatitaea sp. BRH_c12].                      | GCA_000961655.1 |
| KOY46643.1   | HetE-N1→ TPR+GreAB-C+PIN*→   | TPR+GreAB-C+PIN            | 1085 | ACX03_05530   | Gammaproteobacteria | Vibrio parahaemolyticus                      | hypothetical protein ACX03_05530 [Vibrio parahaemolyticus].                            | GCA_001280625.1 |
| KPC32725.1   | PIN*→                        | PIN                        | 407  | ABJ99_1577    | Gammaproteobacteria | Pseudomonas syringae pv. cilantro            | Tetratricopeptide repeat protein [Pseudomonas syringae pv. cilantro].                  | GCA_001293775.1 |
| KPH04186.1   | GreAB-C+PIN*→                | GreAB-C+PIN                | 532  | AOG23_34735   | Alphaproteobacteria | Rhizobium acidisoli                          | hypothetical protein AOG23_34735 [Rhizobium acidisoli].                                | GCA_001297245.1 |
| KPW31206.1   | REase+TPR+GreAB-C+PIN*→      | REase+TPR+GreAB-C+PIN      | 1491 | ALO87_03437   | Gammaproteobacteria | Pseudomonas syringae pv. apii                | Uncharacterized protein ALO87_03437 [Pseudomonas syringae pv. apii].                   | GCA_001401385.1 |
| KPW71831.1   | PIN*→                        | PIN                        | 419  | ALO76_102575  | Gammaproteobacteria | Pseudomonas syringae pv. coriandricola       | hypothetical protein ALO76_102575 [Pseudomonas syringae pv. coriandricola].            | GCA_001400185.1 |
| KPX07181.1   | REase→ TPR+GreAB-C+PIN*→     | TPR+GreAB-C+PIN            | 882  | ALO74_05417   | Gammaproteobacteria | Pseudomonas syringae pv. cunninghamiae       | Uncharacterized protein ALO74_05417, partial [Pseudomonas syringae pv. cunninghamiae]. | GCA_001400795.1 |
| KQR06792.1   | TPR+PIN*→                    | TPR+PIN                    | 1157 | ASF74_05425   | Actinobacteria      | Arthrobacter sp. Leaf145                     | hypothetical protein ASF74_05425 [Arthrobacter sp. Leaf145].                           | GCA_001423565.1 |
| KQY47975.1   | HTH+PNPase+TPR+GreAB-C+PIN*→ | HTH+PNPase+TPR+GreAB-C+PIN | 1492 | ASD18_12170   | Actinobacteria      | Cellulomonas sp. Root137                     | hypothetical protein ASD18_12170 [Cellulomonas sp. Root137].                           | GCA_001426725.1 |
| KRK09263.1   | X+PIN*→                      | X+PIN                      | 1209 | FD11_GL001067 | Firmicutes          | Lactobacillus pobuzihii E100301 = KCTC 13174 | hypothetical protein FD11_GL001067 [Lactobacillus pobuzihii E100301 = KCTC 13174].     | GCA_001433815.1 |
| KSV64106.1   | REase+TPR+TPR+GreAB-C+PIN*→  | REase+TPR+TPR+GreAB-C+PIN  | 1352 | N182_36590    | Alphaproteobacteria | Sinorhizobium sp. GL2                        | hypothetical protein N182_36590 [Sinorhizobium sp. GL2].                               | GCA_001461715.1 |
| KTR52035.1   | PIN*→                        | PIN                        | 473  | NS359_08065   | Actinobacteria      | Curtobacterium oceanosedimentum              | hypothetical protein NS359_08065 [Curtobacterium oceanosedimentum].                    | GCA_001476135.1 |
| KVD10066.1   | REase+TPR+GreAB-C+PIN*→      | REase+TPR+GreAB-C+PIN      | 1276 | WI81_28275    | Betaproteobacteria  | Burkholderia ubonensis                       | hypothetical protein WI81_28275 [Burkholderia ubonensis].                              | GCA_001523425.1 |
| KVK86408.1   | REase+TPR+GreAB-C+PIN*→      | REase+TPR+GreAB-C+PIN      | 1305 | WJ44_35230    | Betaproteobacteria  | Burkholderia ubonensis                       | hypothetical protein WJ44_35230 [Burkholderia ubonensis].                              | GCA_001526225.1 |
| KVP54755.1   | PIN*→                        | PIN                        | 270  | WJ90_06090    | Betaproteobacteria  | Burkholderia ubonensis                       | hypothetical protein WJ90_06090 [Burkholderia ubonensis].                              | GCA_001527145.1 |
| KVR94766.1   | REase+TPR+GreAB-C+PIN*→      | REase+TPR+GreAB-C+PIN      | 1283 | WK29_06535    | Betaproteobacteria  | Burkholderia vietnamiensis                   | hypothetical protein WK29_06535 [Burkholderia vietnamiensis].                          | GCA_001528565.1 |

| acc          | operon                                            | architecture               | len  | gen.name     | taxend              | species                        | define                                                                     | gca             |
|--------------|---------------------------------------------------|----------------------------|------|--------------|---------------------|--------------------------------|----------------------------------------------------------------------------|-----------------|
| KVS41438.1   | REase+TPR+GreAB-C+PIN*→                           | REase+TPR+GreAB-C+PIN      | 1273 | WK37_19925   | Betaproteobacteria  | Burkholderia ubonensis         | hypothetical protein WK37_19925 [Burkholderia ubonensis].                  | GCA_001529725.1 |
| KWO74502.1   | REase+TPR+GreAB-C+PIN*→                           | REase+TPR+GreAB-C+PIN      | 1308 | WM31_08005   | Betaproteobacteria  | Burkholderia ubonensis         | hypothetical protein WM31_08005 [Burkholderia ubonensis].                  | GCA_001534425.1 |
| KWW10220.1   | HetE-N1→ TPR+GreAB-C+PIN→ TPR+GreAB-C+PIN*→       | TPR+GreAB-C+PIN            | 695  | VM82_06380   | Gammaproteobacteria | Pasteurella multocida          | hypothetical protein VM82_06380 [Pasteurella multocida].                   | GCA_001542975.1 |
| KXC04457.1   | X+PIN*→?→ Calcineurin→                            | X+PIN                      | 1058 | MhomT_16215  | Actinobacteria      | Microbacterium hominis         | hypothetical protein MhomT_16215 [Microbacterium hominis].                 | GCA_001553805.1 |
| KXF54879.1   | HTH+PNPase+TPR+GreAB-C+PIN*→                      | HTH+PNPase+TPR+GreAB-C+PIN | 1496 | AXA44_39745  | Actinobacteria      | Rhodococcus sp. SC4            | hypothetical protein AXA44_39745 [Rhodococcus sp. SC4].                    | GCA_001555475.1 |
| KYK33744.1   | TPR+GreAB-C+PIN*→                                 | TPR+GreAB-C+PIN            | 1243 | AYK18_14685  | Euryarchaeota       | Theionarchaea archaeon DG-70   | MAG: hypothetical protein AYK18_14685 [Theionarchaea archaeon DG-70].      | GCA_001595795.1 |
| KZM34260.1   | X+PIN*→                                           | X+PIN                      | 802  | OJAG_30920   | Actinobacteria      | Oerskovia enterophila          | hypothetical protein OJAG_30920 [Oerskovia enterophila].                   | GCA_001624335.1 |
| KZM57325.1   | TPR+PIN*→                                         | TPR+PIN                    | 1172 | A3Q36_16940  | Firmicutes          | Geobacillus stearothermophilus | hypothetical protein A3Q36_16940 [Geobacillus stearothermophilus].         | GCA_001624615.1 |
| MAK67575.1   | HetE-N1→ TPR+GreAB-C+PIN*→   <-REase+UvrD         | TPR+GreAB-C+PIN            | 1111 | CMH19_11360  | Gammaproteobacteria | Methylophaga sp.               | MAG: hypothetical protein CMH19_11360 [Methylophaga sp.].                  | GCA_002692615.1 |
| MAK82682.1   | REase+TPR+GreAB-C+PIN*→                           | REase+TPR+GreAB-C+PIN      | 1322 | CMJ17_12550  | Alphaproteobacteria | Phenylobacterium sp.           | MAG: hypothetical protein CMJ17_12550 [Phenylobacterium sp.].              | GCA_002693985.1 |
| MAM61427.1   | REase+TOPC→   <-?  REase+TPR+GreAB-C+PIN*→        | REase+TPR+GreAB-C+PIN      | 1313 | CMH11_08050  | Alphaproteobacteria | Maritimibacter sp.             | MAG: hypothetical protein CMH11_08050 [Maritimibacter sp.].                | GCA_002695005.1 |
| MAQ47157.1   | TPR+GreAB-C+PIN*→                                 | TPR+GreAB-C+PIN            | 928  | CL812_15115  | Alphaproteobacteria | Actibacterium sp.              | MAG: hypothetical protein CL812_15115 [Actibacterium sp.].                 | GCA_002701285.1 |
| MAX35781.1   | REase+TPR+GreAB-C+PIN*→                           | REase+TPR+GreAB-C+PIN      | 1254 | CME33_04335  | Planctomycetes      | Gimesia sp.                    | MAG: hypothetical protein CME33_04335 [Gimesia sp.].                       | GCA_002706765.1 |
| MAX78311.1   | REase+TPR+GreAB-C+PIN*→                           | REase+TPR+GreAB-C+PIN      | 1318 | CMN12_16605  | Alphaproteobacteria | Roseobacter sp.                | MAG: hypothetical protein CMN12_16605 [Roseobacter sp.].                   | GCA_002706785.1 |
| MBA2669970.1 | TPR+GreAB-C+PIN*→                                 | TPR+GreAB-C+PIN            | 581  | H0U67_06335  | Gemmatimonadetes    | Gemmatimonadetes bacterium     | MAG: hypothetical protein H0U67_06335 [Gemmatimonadetes bacterium].        | GCA_013697765.1 |
| MBA3005285.1 | TPR+GreAB-C+PIN*→                                 | TPR+GreAB-C+PIN            | 1285 | FP810_01590  | Deltaproteobacteria | Desulfocapsa sp.               | MAG: hypothetical protein FP810_01590 [Desulfocapsa sp.].                  | GCA_013792135.1 |
| MBA3178888.1 | HetE-N1→ TPR+GreAB-C+PIN*→?→   <-Trypsin          | TPR+GreAB-C+PIN            | 1121 | CBX59_021210 | Gammaproteobacteria | Salmonella enterica            | hypothetical protein CBX59_021210 [Salmonella enterica].                   | GCA_006112745.2 |
| MBA3341438.1 | REase+TPR+GreAB-C+PIN*→                           | REase+TPR+GreAB-C+PIN      | 1397 | H0T48_06340  | Gemmatimonadetes    | Gemmatimonadaceae bacterium    | MAG: hypothetical protein H0T48_06340 [Gemmatimonadaceae bacterium].       | GCA_013813715.1 |
| MBA3557151.1 | TPR+GreAB-C+PIN*→                                 | TPR+GreAB-C+PIN            | 877  | H0W30_00995  | Gemmatimonadetes    | Gemmatimonadaceae bacterium    | MAG: hypothetical protein H0W30_00995 [Gemmatimonadaceae bacterium].       | GCA_013817545.1 |
| MBA3619565.1 | REase→ PIN*→                                      | PIN                        | 572  | H0W56_08245  | Actinobacteria      | Acidothermales bacterium       | MAG: hypothetical protein H0W56_08245, partial [Acidothermales bacterium]. | GCA_013817005.1 |
| MBA3973802.1 | TPR+GreAB-C+PIN*→                                 | TPR+GreAB-C+PIN            | 1263 | C0504_06240  | Acidobacteria       | Candidatus Solibacter sp.      | MAG: hypothetical protein C0504_06240 [Candidatus Solibacter sp.].         | GCA_013822245.1 |
| MBA4090929.1 | REase+TPR+GreAB-C+PIN*→                           | REase+TPR+GreAB-C+PIN      | 1315 | C0494_10085  | Alphaproteobacteria | Sphingobium sp.                | MAG: hypothetical protein C0494_10085 [Sphingobium sp.].                   | GCA_013822485.1 |
| MBA4148880.1 | TPR+PIN*→                                         | TPR+PIN                    | 1103 | H0X66_12260  | Verrucomicrobia     | Verrucomicrobia bacterium      | MAG: hypothetical protein H0X66_12260 [Verrucomicrobia bacterium].         | GCA_013820875.1 |
| MBB1073428.1 | REase+TPR+GreAB-C+PIN*→                           | REase+TPR+GreAB-C+PIN      | 1321 | HUU62_03265  | Betaproteobacteria  | Rhodoferrax jenense            | DUF4365 domain-containing protein [Rhodoferrax jenense].                   | GCA_014145235.1 |
| MBB1121889.1 | DOC+HTH→ REase+TOPC→ HetE-N1→?→ TPR+GreAB-C+PIN*→ | TPR+GreAB-C+PIN            | 992  | H4983_26725  | Gammaproteobacteria | Pseudomonas aeruginosa         | hypothetical protein H4983_26725 [Pseudomonas aeruginosa].                 | GCA_014145725.1 |
| MBB4577222.1 | REase+TPR+GreAB-C+PIN*→                           | REase+TPR+GreAB-C+PIN      | 1268 | GGE58_005472 | Alphaproteobacteria | Rhizobium lentis               | tetratricopeptide (TPR) repeat protein [Rhizobium lentis].                 | GCA_014198785.1 |



| acc          | operon                            | architecture          | len  | gen.name     | taxend              | species                                       | define                                                                                                                      | gca             |
|--------------|-----------------------------------|-----------------------|------|--------------|---------------------|-----------------------------------------------|-----------------------------------------------------------------------------------------------------------------------------|-----------------|
| MBB5991665.1 | REase→ TPR+GreAB-C+PIN*→?→?→ HNH→ | TPR+GreAB-C+PIN       | 1242 | HNP04_003690 | Gammaproteobacteria | <i>Pseudomonas viridiflava</i>                | tetratricopeptide (TPR) repeat protein/transcription elongation GreA/GreB family factor [ <i>Pseudomonas viridiflava</i> ]. | GCA_014204055.1 |
| MBB6509406.1 | TPR+GreAB-C+PIN*→                 | TPR+GreAB-C+PIN       | 780  | F4695_002763 | Alphaproteobacteria | <i>Rhizobium soli</i>                         | putative nucleic acid-binding protein [ <i>Rhizobium soli</i> ].                                                            | GCA_014207075.1 |
| MBB9310955.1 | TPR+GreAB-C+PIN*→                 | TPR+GreAB-C+PIN       | 575  | FSF17_011690 | Gammaproteobacteria | <i>Escherichia coli</i>                       | hypothetical protein FSF17_011690 [ <i>Escherichia coli</i> ].                                                              | GCA_012385615.2 |
| MBC6414865.1 | REase+TPR+GreAB-C+PIN*→           | REase+TPR+GreAB-C+PIN | 1326 | GDA46_00495  | Oligoflexia         | <i>Bdellovibrionales bacterium</i>            | MAG: hypothetical protein GDA46_00495 [ <i>Bdellovibrionales bacterium</i> ].                                               | GCA_014323935.1 |
| MBC70602.1   | REase+TPR+GreAB-C+PIN*→           | REase+TPR+GreAB-C+PIN | 1253 | CL492_17300  | Gammaproteobacteria | <i>Acinetobacter</i> sp.                      | MAG: hypothetical protein CL492_17300 [ <i>Acinetobacter</i> sp.].                                                          | GCA_002711945.1 |
| MBC7145404.1 | REase+TPR+GreAB-C+PIN*→           | REase+TPR+GreAB-C+PIN | 1332 | H5U24_08360  | Alphaproteobacteria | <i>Thioclava marina</i>                       | MAG: hypothetical protein H5U24_08360 [ <i>Thioclava marina</i> ].                                                          | GCA_014359625.1 |
| MBC7391182.1 | TPR+GreAB-C+PIN*→                 | TPR+GreAB-C+PIN       | 1270 | H7329_18405  | Verrucomicrobia     | <i>Cytophagales bacterium</i>                 | MAG: tetratricopeptide repeat protein [ <i>Opitutaceae bacterium</i> ].                                                     | GCA_014376535.1 |
| MBC74230.1   | TPR+GreAB-C+PIN*→                 | TPR+GreAB-C+PIN       | 1131 | CMH47_18575  | Bacteroidetes       | <i>Muricauda</i> sp.                          | MAG: hypothetical protein CMH47_18575 [ <i>Muricauda</i> sp.].                                                              | GCA_002711825.1 |
| MBD0373736.1 | TPR+GreAB-C*→                     | TPR+GreAB-C           | 885  | ICV60_23090  | Acidobacteria       | <i>Pyrinomonadaceae bacterium</i>             | MAG: tetratricopeptide repeat protein, partial [ <i>Pyrinomonadaceae bacterium</i> ].                                       | GCA_014534425.1 |
| MBD3293793.1 | TPR+PIN*→                         | TPR+PIN               | 1505 | GF393_12790  | Armatimonadetes     | <i>Armatimonadia bacterium</i>                | MAG: hypothetical protein GF393_12790 [ <i>Armatimonadia bacterium</i> ].                                                   | GCA_014728405.1 |
| MBD3811358.1 | REase+TPR+GreAB-C+PIN*→           | REase+TPR+GreAB-C+PIN | 1374 | IE917_03935  | Betaproteobacteria  | <i>Betaproteobacteria bacterium</i>           | MAG: hypothetical protein IE917_03935 [ <i>Betaproteobacteria bacterium</i> ].                                              | GCA_014764035.1 |
| MBD8566197.1 | TPR+GreAB-C+PIN*→                 | TPR+GreAB-C+PIN       | 1235 | IFU01_18215  | Betaproteobacteria  | <i>Oxalobacteraceae</i> sp. CFBP 8763         | hypothetical protein IFU01_18215 [ <i>Oxalobacteraceae</i> sp. CFBP 8763].                                                  | GCA_014841525.1 |
| MBD8722144.1 | REase+TPR+GreAB-C+PIN*→           | REase+TPR+GreAB-C+PIN | 1511 | IFT43_02050  | Betaproteobacteria  | <i>Oxalobacteraceae</i> sp. CFBP 13708        | hypothetical protein IFT43_02050 [ <i>Oxalobacteraceae</i> sp. CFBP 13708].                                                 | GCA_014842315.1 |
| MBE2259083.1 | REase+TPR+GreAB-C+PIN*→           | REase+TPR+GreAB-C+PIN | 1335 | IAE88_09505  | Alphaproteobacteria | <i>Rhodobacteraceae bacterium</i>             | MAG: hypothetical protein IAE88_09505 [ <i>Rhodobacteraceae bacterium</i> ].                                                | GCA_014879755.1 |
| MBE3996728.1 | HetE-N1→?→ TPR+GreAB-C+PIN*→      | TPR+GreAB-C+PIN       | 910  | HJ133_08285  | Gammaproteobacteria | <i>Vibrio parahaemolyticus</i>                | hypothetical protein HJ133_08285 [ <i>Vibrio parahaemolyticus</i> ].                                                        | GCA_014919735.1 |
| MBE7465263.1 | REase+TPR+GreAB-C+PIN*→           | REase+TPR+GreAB-C+PIN | 1253 | HS116_17430  | Planctomycetes      | <i>Planctomycetes bacterium</i>               | MAG: hypothetical protein HS116_17430 [ <i>Planctomycetes bacterium</i> ].                                                  | GCA_015075375.1 |
| MBE8523541.1 | TPR+PIN*→                         | TPR+PIN               | 1310 | ILP97_39665  | Actinobacteria      | <i>Amycolatopsis</i> sp. H6(2020)             | hypothetical protein ILP97_39665 [ <i>Amycolatopsis</i> sp. H6(2020)].                                                      | GCA_015163035.1 |
| MBE8960063.1 | GreAB-C*→                         | GreAB-C               | 307  | IH766_22715  | Gammaproteobacteria | <i>Escherichia coli</i>                       | hypothetical protein IH766_22715, partial [ <i>Escherichia coli</i> ].                                                      | GCA_015206795.1 |
| MBE9468467.1 | TPR+GreAB-C+PIN*→                 | TPR+GreAB-C+PIN       | 1221 | IMY72_09155  | Bacteroidetes       | <i>Bacteroidetes bacterium</i>                | MAG: hypothetical protein IMY72_09155 [ <i>Bacteroidetes bacterium</i> ].                                                   | GCA_015222055.1 |
| MBF0231519.1 | TPR+GreAB-C+PIN*→                 | TPR+GreAB-C+PIN       | 1223 | HQK65_00575  | Deltaproteobacteria | <i>Desulfamplus</i> sp.                       | MAG: hypothetical protein HQK65_00575 [ <i>Desulfamplus</i> sp.].                                                           | GCA_015231525.1 |
| MBF0529118.1 | TPR+GreAB-C+PIN*→                 | TPR+GreAB-C+PIN       | 678  | HQK55_07585  | Deltaproteobacteria | <i>Deltaproteobacteria bacterium</i>          | MAG: hypothetical protein HQK55_07585 [ <i>Deltaproteobacteria bacterium</i> ].                                             | GCA_015233515.1 |
| MBF3699451.1 | TPR+GreAB-C+PIN*→   <-HTH+HTH     | TPR+GreAB-C+PIN       | 872  | ISF48_14710  | Betaproteobacteria  | <i>Burkholderia pseudomallei</i>              | hypothetical protein ISF48_14710 [ <i>Burkholderia pseudomallei</i> ].                                                      | GCA_015319855.1 |
| MBF3842067.1 | TPR+GreAB-C+PIN*→   <-HTH+HTH     | TPR+GreAB-C+PIN       | 872  | ISF68_21105  | Betaproteobacteria  | <i>Burkholderia pseudomallei</i>              | hypothetical protein ISF68_21105 [ <i>Burkholderia pseudomallei</i> ].                                                      | GCA_015320325.1 |
| MBF4269202.1 | TPR+GreAB-C*→                     | TPR+GreAB-C           | 686  | EAY71_20240  | Gammaproteobacteria | <i>Vibrio anguillarum</i>                     | hypothetical protein EAY71_20240, partial [ <i>Vibrio anguillarum</i> ].                                                    | GCA_015343035.1 |
| MBF9243682.1 | REase+TPR+GreAB-C+PIN*→           | REase+TPR+GreAB-C+PIN | 1438 | I4I80_05390  | Gammaproteobacteria | <i>Pseudomonas syringae</i> pv. <i>tomato</i> | hypothetical protein I4I80_05390 [ <i>Pseudomonas syringae</i> pv. <i>tomato</i> ].                                         | GCA_015694365.1 |

| acc          | operon                                       | architecture              | len  | gen.name    | taxend              | species                                                                 | define                                                                                          | gca             |
|--------------|----------------------------------------------|---------------------------|------|-------------|---------------------|-------------------------------------------------------------------------|-------------------------------------------------------------------------------------------------|-----------------|
| MBF9246381.1 | REase+TPR+GreAB-C+PIN*→                      | REase+TPR+GreAB-C+PIN     | 1320 | I4I80_19980 | Gammaproteobacteria | <i>Pseudomonas syringae</i> pv. <i>tomato</i>                           | DUF4365 domain-containing protein [Pseudomonas syringae pv. tomato].                            | GCA_015694365.1 |
| MBG2992436.1 | PAIREDC-HTH→ PSE→ HetE-N1→ TPR+GreAB-C+PIN*→ | TPR+GreAB-C+PIN           | 1092 | I4607_12420 | Gammaproteobacteria | <i>Proteus mirabilis</i>                                                | hypothetical protein I4607_12420 [Proteus mirabilis].                                           | GCA_015723275.1 |
| MBG6040926.1 | PAIREDC-HTH→ PSE→ HetE-N1→ TPR+GreAB-C+PIN*→ | TPR+GreAB-C+PIN           | 1092 | I5F94_05610 | Gammaproteobacteria | <i>Proteus mirabilis</i>                                                | hypothetical protein I5F94_05610 [Proteus mirabilis].                                           | GCA_015740165.1 |
| MBG6251627.1 | TPR+GreAB-C+PIN*→                            | TPR+GreAB-C+PIN           | 1140 | I5I20_11010 | Gammaproteobacteria | <i>Pseudomonas aeruginosa</i>                                           | hypothetical protein I5I20_11010 [Pseudomonas aeruginosa].                                      | GCA_015762745.1 |
| MBG7090225.1 | TPR+GreAB-C+PIN*→                            | TPR+GreAB-C+PIN           | 1170 | I5G28_04925 | Gammaproteobacteria | <i>Pseudomonas aeruginosa</i>                                           | hypothetical protein I5G28_04925 [Pseudomonas aeruginosa].                                      | GCA_015765435.1 |
| MBH04121.1   | REase+TPR+GreAB-C+PIN*→                      | REase+TPR+GreAB-C+PIN     | 1338 | CMP08_08385 | Gammaproteobacteria | Xanthomonadales bacterium                                               | MAG: hypothetical protein CMP08_08385 [Xanthomonadales bacterium].                              | GCA_002715985.1 |
| MBH1476826.1 | REase+TPR+GreAB-C+PIN*→                      | REase+TPR+GreAB-C+PIN     | 1243 | I5U61_05170 | Gammaproteobacteria | <i>Stenotrophomonas maltophilia</i>                                     | CDC27 family protein [Stenotrophomonas maltophilia].                                            | GCA_015997065.1 |
| MBH7847781.1 | TPR+GreAB-C+PIN*→                            | TPR+GreAB-C+PIN           | 1071 | I6A75_20240 | Firmicutes          | <i>Clostridioides difficile</i>                                         | hypothetical protein I6A75_20240 [Clostridioides difficile].                                    | GCA_016052935.1 |
| MBI1182363.1 | REase+TPR+TPR+GreAB-C+PIN*→                  | REase+TPR+TPR+GreAB-C+PIN | 1295 | GC201_17615 | Alphaproteobacteria | Alphaproteobacteria bacterium                                           | MAG: hypothetical protein GC201_17615 [Alphaproteobacteria bacterium].                          | GCA_016124315.1 |
| MBI1904375.1 | TPR+GreAB-C+PIN*→                            | TPR+GreAB-C+PIN           | 1292 | HYS13_25040 | Planctomycetes      | Planctomycetia bacterium                                                | MAG: hypothetical protein HYS13_25040 [Planctomycetia bacterium].                               | GCA_016177915.1 |
| MBI3888209.1 | TPR+PIN*→                                    | TPR+PIN                   | 1190 | HY311_00230 | Bacteria            | Candidatus Nomurabacteria bacterium                                     | MAG: tetratricopeptide repeat protein [Candidatus Nomurabacteria bacterium].                    | GCA_016199805.1 |
| MBI4633825.1 | REase+TPR+GreAB-C+PIN*→                      | REase+TPR+GreAB-C+PIN     | 1294 | HY742_08030 | Deltaproteobacteria | Deltaproteobacteria bacterium                                           | MAG: hypothetical protein HY742_08030 [Deltaproteobacteria bacterium].                          | GCA_016209105.1 |
| MBI4696055.1 | Cas_Cas1→ REase+TPR+GreAB-C+PIN*→            | REase+TPR+GreAB-C+PIN     | 1313 | HY749_18755 | Gammaproteobacteria | Gammaproteobacteria bacterium                                           | MAG: DUF4365 domain-containing protein [Gammaproteobacteria bacterium].                         | GCA_016209015.1 |
| MBI4846278.1 | TM+SIR2+TPR+PIN+PIN+TM*→                     | TM+SIR2+TPR+PIN+PIN+TM    | 2304 | HY810_07390 | PVC group           | Candidatus Omnitrophica bacterium                                       | MAG: SIR2 family protein [Candidatus Omnitrophica bacterium].                                   | GCA_016213925.1 |
| MBI5207389.1 | HTH+REase+PIN*→                              | HTH+REase+PIN             | 808  | HY934_06310 | Bacteria            | Candidatus Firestonebacteria bacterium                                  | MAG: helix-turn-helix domain-containing protein [Candidatus Firestonebacteria bacterium].       | GCA_016212735.1 |
| MBI5354508.1 | TPR+GreAB-C+PIN*→                            | TPR+GreAB-C+PIN           | 1282 | HZB50_17850 | Chloroflexi         | <i>Chloroflexi</i> bacterium                                            | MAG: hypothetical protein HZB50_17850 [Chloroflexi bacterium].                                  | GCA_016219545.1 |
| MBI5356660.1 | TPR+PIN*→   <-?<-?  HTH→                     | TPR+PIN                   | 1074 | HZB78_03530 | Bacteria            | Candidatus Collierbacteria bacterium                                    | MAG: hypothetical protein HZB78_03530 [Candidatus Collierbacteria bacterium].                   | GCA_016219325.1 |
| MBI5458930.1 | HEPN→ REase+SNF2→ REase+TPR+GreAB-C+PIN*→    | REase+TPR+GreAB-C+PIN     | 1256 | HY987_04275 | Euryarchaeota       | <i>Methanobacterium</i> sp.                                             | MAG: hypothetical protein HY987_04275 [Methanobacterium sp.].                                   | GCA_016217785.1 |
| MBI5516335.1 | GreAB*→                                      | GreAB                     | 172  | HY909_21300 | Deltaproteobacteria | Deltaproteobacteria bacterium                                           | MAG: GreA/GreB family elongation factor [Deltaproteobacteria bacterium].                        | GCA_016218725.1 |
| MBI5711428.1 | GreAB*→                                      | GreAB                     | 903  | HZC42_14175 | Bacteria            | Candidatus Eisenbacteria bacterium                                      | MAG: GreA/GreB family elongation factor [Candidatus Eisenbacteria bacterium].                   | GCA_016223045.1 |
| MBI5910925.1 | REase+TPR+GreAB-C+PIN*→                      | REase+TPR+GreAB-C+PIN     | 1318 | HY848_13355 | Betaproteobacteria  | Betaproteobacteria bacterium                                            | MAG: hypothetical protein HY848_13355 [Betaproteobacteria bacterium].                           | GCA_016234705.1 |
| MBI5925874.1 | REase+TPR+GreAB-C+PIN*→                      | REase+TPR+GreAB-C+PIN     | 1369 | HY836_09780 | Betaproteobacteria  | <i>Aquabacterium</i> sp.                                                | MAG: hypothetical protein HY836_09780 [Aquabacterium sp.].                                      | GCA_016234775.1 |
| MBI6873434.1 | TPR+PIN*→                                    | TPR+PIN                   | 1232 | I6U51_12055 | Firmicutes          | <i>Clostridium aciditolerans</i>                                        | hypothetical protein I6U51_12055 [Clostridium aciditolerans].                                   | GCA_016316925.1 |
| MBJ3588954.1 | TPR+GreAB-C+PIN*→                            | TPR+GreAB-C+PIN           | 924  | JGC49_23910 | Gammaproteobacteria | <i>Salmonella enterica</i> subsp. <i>enterica</i> serovar <i>London</i> | hypothetical protein JGC49_23910, partial [Salmonella enterica subsp. enterica serovar London]. | GCA_016412075.1 |
| MBJ7510055.1 | REase+TPR+TPR+GreAB-C+PIN*→?→ HNH→           | REase+TPR+TPR+GreAB-C+PIN | 1324 | JHC97_02180 | Alphaproteobacteria | <i>Brevundimonas</i> sp.                                                | MAG: hypothetical protein JHC97_02180 [Brevundimonas sp.].                                      | GCA_016463795.1 |

| acc          | operon                           | architecture                | len  | gen.name     | taxend              | species                       | define                                                                 | gca             |
|--------------|----------------------------------|-----------------------------|------|--------------|---------------------|-------------------------------|------------------------------------------------------------------------|-----------------|
| MBK4592903.1 | TPR+GreAB-C+PIN*→                | TPR+GreAB-C+PIN             | 444  | JJQ23_24565  | Gammaproteobacteria | Enterobacter hormaechei       | hypothetical protein JJQ23_24565, partial [Enterobacter hormaechei].   | GCA_016633275.1 |
| MBK4660580.1 | TPR+GreAB-C*→                    | TPR+GreAB-C                 | 362  | JJQ36_24785  | Gammaproteobacteria | Enterobacter hormaechei       | hypothetical protein JJQ36_24785, partial [Enterobacter hormaechei].   | GCA_016633665.1 |
| MBK4769022.1 | HetE-N1→ TPR+GreAB-C+PIN*→       | TPR+GreAB-C+PIN             | 1118 | FT726_04985  | Gammaproteobacteria | Pantoea sp. Morm              | MAG: hypothetical protein FT726_04985 [Pantoea sp. Morm].              | GCA_016643525.1 |
| MBK5650341.1 | REase+TPR+TPR+GreAB-C+PIN*→      | REase+TPR+TPR+GreAB-C+PIN   | 1254 | I4N50_01815  | Alphaproteobacteria | Rhizobium sp.                 | MAG: hypothetical protein I4N50_01815, partial [Rhizobium sp.].        | GCA_016652855.1 |
| MBK7033605.1 | TPR+GreAB-C+PIN*→                | TPR+GreAB-C+PIN             | 852  | IPH49_10150  | Ignavibacteriae     | Ignavibacteria bacterium      | MAG: hypothetical protein IPH49_10150 [Ignavibacteria bacterium].      | GCA_016708405.1 |
| MBK7130254.1 | TPR+GreAB-C+PIN*→                | TPR+GreAB-C+PIN             | 1238 | IPH66_12960  | Bacteroidetes       | Crocinitomicaceae bacterium   | MAG: hypothetical protein IPH66_12960 [Crocinitomicaceae bacterium].   | GCA_016708105.1 |
| MBK7149038.1 | TPR+GreAB-C+PIN*→?→?→?→ TRD+TRD→ | TPR+GreAB-C+PIN             | 1255 | IPH78_09510  | Bacteroidetes       | Bacteroidetes bacterium       | MAG: tetratricopeptide repeat protein [Bacteroidetes bacterium].       | GCA_016707905.1 |
| MBK7953772.1 | REase+TPR+GreAB-C+PIN*→          | REase+TPR+GreAB-C+PIN       | 1351 | IPK02_07330  | Betaproteobacteria  | Candidatus Accumulibacter sp. | MAG: hypothetical protein IPK02_07330 [Candidatus Accumulibacter sp.]. | GCA_016713625.1 |
| MBK8138001.1 | TPR+GreAB-C+PIN*→                | TPR+GreAB-C+PIN             | 749  | IPK52_19665  | Chloroflexi         | Chloroflexi bacterium         | MAG: hypothetical protein IPK52_19665 [Chloroflexi bacterium].         | GCA_016712885.1 |
| MBK8143858.1 | TPR+PIN*→                        | TPR+PIN                     | 641  | IPK62_02070  | Bacteroidetes       | Bacteroidetes bacterium       | MAG: hypothetical protein IPK62_02070 [Bacteroidetes bacterium].       | GCA_016712665.1 |
| MBK8927388.1 | TPR+GreAB-C+PIN*→                | TPR+GreAB-C+PIN             | 1238 | IPM74_16180  | Bacteroidetes       | Crocinitomicaceae bacterium   | MAG: hypothetical protein IPM74_16180 [Crocinitomicaceae bacterium].   | GCA_016720025.1 |
| MBK9927324.1 | TPR+GreAB-C+PIN*→                | TPR+GreAB-C+PIN             | 1144 | IPP66_18800  | Chloroflexi         | Anaerolineales bacterium      | MAG: tetratricopeptide repeat protein [Anaerolineales bacterium].      | GCA_016721115.1 |
| MBL0869327.1 | TPR+GreAB-C+PIN*→                | TPR+GreAB-C+PIN             | 1510 | IBJ18_01985  | Planctomycetes      | Phycisphaerales bacterium     | MAG: SIR2 family protein [Phycisphaerales bacterium].                  | GCA_016741915.1 |
| MBL0919126.1 | REase+TPR+GreAB-C+PIN*→          | REase+TPR+GreAB-C+PIN       | 1320 | IBJ14_10515  | Betaproteobacteria  | Hydrogenophaga sp.            | MAG: DUF4365 domain-containing protein [Hydrogenophaga sp.].           | GCA_016741995.1 |
| MBL1279106.1 | TPR+PIN*→                        | TPR+PIN                     | 1234 | COA33_002470 | Bacteroidetes       | Fluviicola sp.                | MAG: hypothetical protein COA33_002470 [Fluviicola sp.].               | GCA_002734065.2 |
| MBL4609540.1 | HetE-N1→ TPR+GreAB-C+PIN*→       | TPR+GreAB-C+PIN             | 1114 | JKY58_02600  | Gammaproteobacteria | Pseudomonas sp.               | MAG: hypothetical protein JKY58_02600 [Pseudomonas sp.].               | GCA_016763285.1 |
| MBL7760873.1 | TPR+GreAB-C+PIN*→                | TPR+GreAB-C+PIN             | 1264 | JNK08_09270  | Bacteroidetes       | Sediminibacterium sp.         | MAG: hypothetical protein JNK08_09270 [Sediminibacterium sp.].         | GCA_016786865.1 |
| MBL7768787.1 | TPR+GreAB-C+PIN*→                | TPR+GreAB-C+PIN             | 1258 | JNK20_07425  | Bacteroidetes       | Flavipsychrobacter sp.        | MAG: hypothetical protein JNK20_07425 [Flavipsychrobacter sp.].        | GCA_016787265.1 |
| MBL7772244.1 | TPR+GreAB-C+PIN*→                | TPR+GreAB-C+PIN             | 1151 | JNM95_05270  | Bacteroidetes       | Chitinophagaceae bacterium    | MAG: hypothetical protein JNM95_05270 [Chitinophagaceae bacterium].    | GCA_016787065.1 |
| MBL7856049.1 | TPR+GreAB-C+PIN*→                | TPR+GreAB-C+PIN             | 1173 | JNM57_00050  | Bacteroidetes       | Cyclobacteriaceae bacterium   | MAG: hypothetical protein JNM57_00050 [Cyclobacteriaceae bacterium].   | GCA_016787565.1 |
| MBL8263961.1 | REase+TPR+GreAB-C+PIN*→          | REase+TPR+GreAB-C+PIN       | 1239 | JNM58_16225  | Gammaproteobacteria | Xanthomonadaceae bacterium    | MAG: hypothetical protein JNM58_16225 [Xanthomonadaceae bacterium].    | GCA_016789405.1 |
| MBL8602392.1 | <-SIG+SM-MscS<-?<-?  GreAB*→     | GreAB                       | 172  | JNK72_10760  | Deltaproteobacteria | Myxococcales bacterium        | MAG: GreA/GreB family elongation factor [Myxococcales bacterium].      | GCA_016792845.1 |
| MBL8821106.1 | REase→?→ REase+TPR+GreAB-C+PIN*→ | REase+TPR+GreAB-C+PIN       | 1262 | JNJ77_00865  | Planctomycetes      | Planctomycetia bacterium      | MAG: hypothetical protein JNJ77_00865 [Planctomycetia bacterium].      | GCA_016795155.1 |
| MBL8873833.1 | MNS+TPR+PIN*→                    | MNS+TPR+PIN                 | 2502 | JNK90_28920  | Planctomycetes      | Planctomycetaceae bacterium   | MAG: tetratricopeptide repeat protein [Planctomycetaceae bacterium].   | GCA_016792705.1 |
| MBL8874044.1 | TPR+GreAB-C+PIN*→                | TPR+GreAB-C+PIN             | 1287 | JNK90_29995  | Planctomycetes      | Planctomycetaceae bacterium   | MAG: hypothetical protein JNK90_29995 [Planctomycetaceae bacterium].   | GCA_016792705.1 |
| MBL9102506.1 | Calcineurin+TPR+GreAB-C+PIN*→    | Calcineurin+TPR+GreAB-C+PIN | 1429 | JNL82_16210  | Deltaproteobacteria | Myxococcales bacterium        | MAG: metallophosphoesterase [Myxococcales bacterium].                  | GCA_016793465.1 |

| acc          | operon                                               | architecture              | len  | gen.name    | taxend              | species                           | define                                                                       | gca             |
|--------------|------------------------------------------------------|---------------------------|------|-------------|---------------------|-----------------------------------|------------------------------------------------------------------------------|-----------------|
| MBM0224540.1 | TPR+PIN*→                                            | TPR+PIN                   | 990  | JNW87_02235 | Actinobacteria      | Micromonospora sp. ATA51          | hypothetical protein JNW87_02235 [Micromonospora sp. ATA51].                 | GCA_016802855.1 |
| MBM0258116.1 | TM+TPR+PIN*→                                         | TM+TPR+PIN                | 1165 | JNW89_16135 | Actinobacteria      | Micromonospora sp. 4G55           | hypothetical protein JNW89_16135 [Micromonospora sp. 4G55].                  | GCA_016803375.1 |
| MBM4070384.1 | TPR+GreAB-C*→                                        | TPR+GreAB-C               | 409  | FJ271_15725 | Planctomycetes      | Planctomycetes bacterium          | MAG: hypothetical protein FJ271_15725 [Planctomycetes bacterium].            | GCA_016873095.1 |
| MBM4845996.1 | HetE-N1→ HetE-N1+TPR+GreAB-C+PIN*→                   | HetE-N1+TPR+GreAB-C+PIN   | 1091 | HYO58_20990 | Gammaproteobacteria | Vibrio parahaemolyticus           | hypothetical protein HYO58_20990 [Vibrio parahaemolyticus].                  | GCA_016876175.1 |
| MBN1214554.1 | TPR+PIN*→                                            | TPR+PIN                   | 1151 | JXA99_03840 | Asgard group        | Candidatus Lokiarchaeota archaeon | MAG: hypothetical protein JXA99_03840 [Candidatus Lokiarchaeota archaeon].   | GCA_016926735.1 |
| MBN1453691.1 | TPR+GreAB-C+PIN*→                                    | TPR+GreAB-C+PIN           | 1287 | JW963_21935 | Chloroflexi         | Anaerolineales bacterium          | MAG: hypothetical protein JW963_21935 [Anaerolineales bacterium].            | GCA_016928525.1 |
| MBN2019675.1 | TPR+PIN*→                                            | TPR+PIN                   | 1063 | JW749_05560 | Planctomycetes      | Sedimentisphaerales bacterium     | MAG: tetratricopeptide repeat protein [Sedimentisphaerales bacterium].       | GCA_016932095.1 |
| MBN2455312.1 | TPR+GreAB-C+PIN*→                                    | TPR+GreAB-C+PIN           | 958  | JXB29_02055 | Planctomycetes      | Sedimentisphaerales bacterium     | MAG: hypothetical protein JXB29_02055 [Sedimentisphaerales bacterium].       | GCA_016935195.1 |
| MBN4052768.1 | TPR+GreAB-C+PIN*→                                    | TPR+GreAB-C+PIN           | 1150 | JYU07_00650 | Chloroflexi         | Roseiflexus sp. AH-315-K22        | hypothetical protein JYU07_00650, partial [Roseiflexus sp. AH-315-K22].      | GCA_017114345.1 |
| MBN5297052.1 | HetE-N1→ TPR+GreAB-C+PIN*→                           | TPR+GreAB-C+PIN           | 1090 | JY477_14370 | Gammaproteobacteria | Serratia marcescens               | hypothetical protein JY477_14370 [Serratia marcescens].                      | GCA_017152845.1 |
| MBN8213566.1 | REase+TPR+GreAB-C+PIN*→                              | REase+TPR+GreAB-C+PIN     | 1240 | J0M09_11660 | Gammaproteobacteria | Xanthomonadales bacterium         | MAG: hypothetical protein J0M09_11660 [Xanthomonadales bacterium].           | GCA_017302135.1 |
| MBN8506452.1 | REase+TPR+GreAB-C+PIN*→                              | REase+TPR+GreAB-C+PIN     | 1310 | J0L58_18450 | Betaproteobacteria  | Burkholderiales bacterium         | MAG: DUF4365 domain-containing protein [Burkholderiales bacterium].          | GCA_017302655.1 |
| MBN8549455.1 | <-HNNH<-?<-?  ?→   <-?  ?→?→ REase+TPR+GreAB-C+PIN*→ | REase+TPR+GreAB-C+PIN     | 1254 | J0M12_09085 | Deltaproteobacteria | Deltaproteobacteria bacterium     | MAG: hypothetical protein J0M12_09085 [Deltaproteobacteria bacterium].       | GCA_017302875.1 |
| MBN8618419.1 | TPR+PIN*→                                            | TPR+PIN                   | 1277 | J0L63_05915 | Chloroflexi         | Anaerolineae bacterium            | MAG: hypothetical protein J0L63_05915 [Anaerolineae bacterium].              | GCA_017303775.1 |
| MBN8865737.1 | TPR+GreAB-C+PIN*→   <-REase                          | TPR+GreAB-C+PIN           | 435  | J0H92_20355 | Bacteroidetes       | Sphingobacteriales bacterium      | MAG: hypothetical protein J0H92_20355 [Sphingobacteriales bacterium].        | GCA_017304765.1 |
| MBN8904954.1 | TPR+GreAB-C+PIN*→ REase→                             | TPR+GreAB-C+PIN           | 679  | J0H57_28395 | Alphaproteobacteria | Rhodospirillales bacterium        | MAG: hypothetical protein J0H57_28395, partial [Rhodospirillales bacterium]. | GCA_017305035.1 |
| MBN8956855.1 | REase+TPR+TPR+GreAB-C+PIN*→                          | REase+TPR+TPR+GreAB-C+PIN | 1322 | J0H17_09800 | Alphaproteobacteria | Rhizobiales bacterium             | MAG: GreA/GreB family elongation factor [Rhizobiales bacterium].             | GCA_017304555.1 |
| MBN8979284.1 | TPR+GreAB-C+PIN*→                                    | TPR+GreAB-C+PIN           | 1129 | J0I08_22735 | Alphaproteobacteria | Rhizobiales bacterium             | MAG: hypothetical protein J0I08_22735 [Rhizobiales bacterium].               | GCA_017305555.1 |
| MBN9409395.1 | REase+TPR+GreAB-C+PIN*→                              | REase+TPR+GreAB-C+PIN     | 1520 | J0H69_09625 | Betaproteobacteria  | Burkholderiales bacterium         | MAG: hypothetical protein J0H69_09625 [Burkholderiales bacterium].           | GCA_017307855.1 |
| MBN9598737.1 | TIR→?→?→ TPR+GreAB-C+PIN*→                           | TPR+GreAB-C+PIN           | 1117 | J0G28_03540 | Alphaproteobacteria | Afipia sp.                        | MAG: hypothetical protein J0G28_03540 [Afipia sp.].                          | GCA_017308625.1 |
| MBO1224632.1 | TPR+GreAB-C+PIN*→                                    | TPR+GreAB-C+PIN           | 1279 | JYX80_09380 | Planctomycetes      | Candidatus Scalindua sediminis    | MAG: hypothetical protein JYX80_09380 [Candidatus Scalindua sediminis].      | GCA_017368835.1 |
| MBO5183033.1 | TPR+GreAB-C+PIN*→                                    | TPR+GreAB-C+PIN           | 1061 | J6B64_01405 | Firmicutes          | Bacilli bacterium                 | MAG: hypothetical protein J6B64_01405 [Bacilli bacterium].                   | GCA_017623135.1 |
| MBO5920175.1 | TPR+GreAB-C+PIN*→                                    | TPR+GreAB-C+PIN           | 507  | J6Q34_06770 | Bacteroidetes       | Bacteroidales bacterium           | MAG: hypothetical protein J6Q34_06770, partial [Bacteroidales bacterium].    | GCA_017631435.1 |
| MBO6496597.1 | TPR+GreAB-C+PIN*→                                    | TPR+GreAB-C+PIN           | 1166 | JJ978_13575 | Bacteroidetes       | Roseivirga sp.                    | MAG: hypothetical protein JJ978_13575 [Roseivirga sp.].                      | GCA_017640405.1 |
| MBO6761342.1 | TPR+GreAB-C+PIN*→                                    | TPR+GreAB-C+PIN           | 1095 | JJ909_10290 | Bacteroidetes       | Roseivirga sp.                    | MAG: hypothetical protein JJ909_10290, partial [Roseivirga sp.].             | GCA_017643085.1 |
| MBO7636147.1 | TPR+GreAB-C+PIN*→                                    | TPR+GreAB-C+PIN           | 1171 | J6S89_06175 | Bacteroidetes       | Paludibacteraceae bacterium       | MAG: hypothetical protein J6S89_06175 [Paludibacteraceae bacterium].         | GCA_017651825.1 |

| acc          | operon                               | architecture                       | len  | gen.name    | taxend              | species                                            | define                                                                                          | gca             |
|--------------|--------------------------------------|------------------------------------|------|-------------|---------------------|----------------------------------------------------|-------------------------------------------------------------------------------------------------|-----------------|
| MBP8894107.1 | TPR+GreAB-C+PIN*→                    | TPR+GreAB-C+PIN                    | 985  | KBH09_17290 | Bacteroidetes       | Saprosiraceae bacterium                            | MAG: hypothetical protein KBH09_17290 [Saprosiraceae bacterium].                                | GCA_018055665.1 |
| MBR7522021.1 | HetE-N1→ TPR+GreAB-C+PIN*→           | TPR+GreAB-C+PIN                    | 1105 | KC233_15980 | Gammaproteobacteria | Pseudomonas juntendi                               | hypothetical protein KC233_15980 [Pseudomonas juntendi].                                        | GCA_018138545.1 |
| MHJ03184.1   | TPR+GreAB-C+PIN*→                    | TPR+GreAB-C+PIN                    | 523  | EEN62_25195 | Gammaproteobacteria | Salmonella enterica                                | hypothetical protein EEN62_25195 [Salmonella enterica].                                         | GCA_003786665.1 |
| MKC77438.1   | TPR+GreAB-C+PIN*→?→   <-Trypsin      | TPR+GreAB-C+PIN                    | 1057 | D1800_22940 | Gammaproteobacteria | Salmonella enterica subsp. enterica serovar Denver | hypothetical protein D1800_22940, partial [Salmonella enterica subsp. enterica serovar Denver]. | GCA_003891855.1 |
| MPS34312.1   | REase+TPR+GreAB-C+PIN*→              | REase+TPR+GreAB-C+PIN              | 1237 | E2593_03230 | Gammaproteobacteria | Stenotrophomonas sp.                               | MAG: hypothetical protein E2593_03230 [Stenotrophomonas sp.].                                   | GCA_009360425.1 |
| MSW50706.1   | TPR+PIN*→                            | TPR+PIN                            | 1289 | F2817_07440 | Actinobacteria      | Actinobacteria bacterium                           | MAG: hypothetical protein F2817_07440 [Actinobacteria bacterium].                               | GCA_009699505.1 |
| MTI67851.1   | TPR+GreAB-C+PIN*→                    | TPR+GreAB-C+PIN                    | 1274 | FH753_14795 | Firmicutes          | Firmicutes bacterium                               | MAG: hypothetical protein FH753_14795 [Firmicutes bacterium].                                   | GCA_009711765.1 |
| MVM42293.1   | -                                    | -                                  | 400  | GO730_39050 | Bacteroidetes       | Spirosoma sp. HMF3257                              | hypothetical protein GO730_39050 [Spirosoma sp. HMF3257].                                       | GCA_009754885.1 |
| MXP30641.1   | REase→?→ REase+TPR+GreAB-C+PIN*→     | REase+TPR+GreAB-C+PIN              | 1265 | GRI94_02255 | Alphaproteobacteria | Parerythrobacter jejuensis                         | hypothetical protein GRI94_02255 [Parerythrobacter jejuensis].                                  | GCA_009827995.1 |
| MXW27298.1   | REase+TPR+GREAB-C+PIN*→              | REase+TPR+GREAB-C+PIN              | 1302 | F4Z80_00100 | Chloroflexi         | Chloroflexi bacterium                              | MAG: hypothetical protein F4Z80_00100 [Chloroflexi bacterium].                                  | GCA_009835825.1 |
| MXX46821.1   | TPR+GreAB-C+PIN*→                    | TPR+GreAB-C+PIN                    | 1267 | F4Z38_00735 | Chloroflexi         | Chloroflexi bacterium                              | MAG: tetratricopeptide repeat protein [Chloroflexi bacterium].                                  | GCA_009836695.1 |
| MXX90812.1   | SFI-Helicase+REase+TPR+GreAB-C+PIN*→ | SFI-Helicase+REase+TPR+GreAB-C+PIN | 1846 | F4Y68_16490 | Alphaproteobacteria | Boseongicola sp. SB0665_bin_10                     | MAG: DUF4011 domain-containing protein [Boseongicola sp. SB0665_bin_10].                        | GCA_009838075.1 |
| MXX91940.1   | GreAB*→?→?→ DAGKIN→                  | GreAB                              | 297  | F4Y63_00605 | Chloroflexi         | Chloroflexi bacterium                              | MAG: transcription elongation factor GreA [Chloroflexi bacterium].                              | GCA_009838175.1 |
| MXX97366.1   | REase+TPR+GreAB-C+PIN*→              | REase+TPR+GreAB-C+PIN              | 1278 | F4Y64_07095 | Bacteroidetes       | Rhodothermaceae bacterium                          | MAG: hypothetical protein F4Y64_07095 [Rhodothermaceae bacterium].                              | GCA_009838195.1 |
| MXZ48148.1   | REase+TPR+GreAB-C+PIN*→              | REase+TPR+GreAB-C+PIN              | 1281 | F4Z13_02660 | Bacteria            | Candidatus Dadabacteria bacterium                  | MAG: hypothetical protein F4Z13_02660 [Candidatus Dadabacteria bacterium].                      | GCA_009837205.1 |
| MXZ55165.1   | REase+TPR+GreAB-C+PIN*→              | REase+TPR+GreAB-C+PIN              | 1297 | F4Z14_03240 | Gammaproteobacteria | Gammaproteobacteria bacterium                      | MAG: hypothetical protein F4Z14_03240 [Gammaproteobacteria bacterium].                          | GCA_009837185.1 |
| MXZ61096.1   | REase+TPR+GreAB-C+PIN*→              | REase+TPR+GreAB-C+PIN              | 1297 | F4Z12_09585 | Acidobacteria       | Acidobacteria bacterium                            | MAG: hypothetical protein F4Z12_09585 [Acidobacteria bacterium].                                | GCA_009837215.1 |
| MYA00894.1   | TPR+GreAB-C+PIN*→                    | TPR+GreAB-C+PIN                    | 1267 | F4Y35_03835 | Chloroflexi         | Chloroflexi bacterium                              | MAG: tetratricopeptide repeat protein [Chloroflexi bacterium].                                  | GCA_009838735.1 |
| MYA68860.1   | TPR+GreAB-C+PIN*→                    | TPR+GreAB-C+PIN                    | 1308 | F4Y19_01960 | Bacteria            | Candidatus Poribacteria bacterium                  | MAG: tetratricopeptide repeat protein [Candidatus Poribacteria bacterium].                      | GCA_009839085.1 |
| MYB15443.1   | TPR+GreAB-C+PIN*→                    | TPR+GreAB-C+PIN                    | 1263 | F4X41_00185 | Chloroflexi         | Chloroflexi bacterium                              | MAG: hypothetical protein F4X41_00185 [Chloroflexi bacterium].                                  | GCA_009840625.1 |
| MYB42498.1   | TPR+GreAB-C+PIN*→                    | TPR+GreAB-C+PIN                    | 1283 | F4X76_09995 | Chloroflexi         | Chloroflexi bacterium                              | MAG: tetratricopeptide repeat protein [Chloroflexi bacterium].                                  | GCA_009839925.1 |
| MYB43588.1   | TPR+PIN*→                            | TPR+PIN                            | 1200 | F4X74_01405 | Actinobacteria      | Acidimicrobia bacterium                            | MAG: hypothetical protein F4X74_01405 [Acidimicrobia bacterium].                                | GCA_009839965.1 |
| MYB75895.1   | TPR+GreAB-C+PIN*→                    | TPR+GreAB-C+PIN                    | 1300 | F4X83_02110 | Chloroflexi         | Chloroflexi bacterium                              | MAG: hypothetical protein F4X83_02110 [Chloroflexi bacterium].                                  | GCA_009839775.1 |
| MYC64541.1   | TPR+GreAB-C+PIN*→                    | TPR+GreAB-C+PIN                    | 1258 | F4X16_17195 | Chloroflexi         | Caldilineaceae bacterium SB0661_bin_34             | MAG: tetratricopeptide repeat protein [Caldilineaceae bacterium SB0661_bin_34].                 | GCA_009841145.1 |
| MYD93275.1   | REase+TPR+GreAB-C+PIN*→              | REase+TPR+GreAB-C+PIN              | 1302 | F4Y02_06215 | Chloroflexi         | Chloroflexi bacterium                              | MAG: hypothetical protein F4Y02_06215 [Chloroflexi bacterium].                                  | GCA_009839425.1 |

| acc        | operon                                                                                                                       | architecture              | len  | gen.name     | taxend                | species                                  | define                                                                              | gca             |
|------------|------------------------------------------------------------------------------------------------------------------------------|---------------------------|------|--------------|-----------------------|------------------------------------------|-------------------------------------------------------------------------------------|-----------------|
| MYE61432.1 | TPR+GreAB-C+PIN*→                                                                                                            | TPR+GreAB-C+PIN           | 638  | F4235_05210  | Bacteria              | Candidatus Dadabacteria bacterium        | MAG: GreA/GreB family elongation factor [Candidatus Dadabacteria bacterium].        | GCA_009841925.1 |
| MYF79095.1 | TPR+GreAB-C+PIN*→                                                                                                            | TPR+GreAB-C+PIN           | 716  | F4180_04215  | Chloroflexi           | Chloroflexi bacterium                    | MAG: tetratricopeptide repeat protein, partial [Chloroflexi bacterium].             | GCA_009843025.1 |
| MYH48359.1 | TPR+GreAB-C+PIN*→                                                                                                            | TPR+GreAB-C+PIN           | 1248 | F4151_02205  | Gammaproteobacteria   | Gammaproteobacteria bacterium            | MAG: hypothetical protein F4151_02205 [Gammaproteobacteria bacterium].              | GCA_009843625.1 |
| MYK18704.1 | TPR+GreAB-C+PIN*→                                                                                                            | TPR+GreAB-C+PIN           | 911  | F4055_11145  | Bacteria              | Candidatus Poribacteria bacterium        | MAG: tetratricopeptide repeat protein, partial [Candidatus Poribacteria bacterium]. | GCA_009845505.1 |
| MYK96751.1 | TPR+GreAB-C+PIN*→                                                                                                            | TPR+GreAB-C+PIN           | 470  | F4009_22610  | Bacteria              | Candidatus Poribacteria bacterium        | MAG: hypothetical protein F4009_22610 [Candidatus Poribacteria bacterium].          | GCA_009846415.1 |
| NAT27530.1 | TPR+GreAB-C+PIN*→                                                                                                            | TPR+GreAB-C+PIN           | 692  | CVE22_06655  | Gammaproteobacteria   | Pseudomonas syringae pv. actinidiae      | hypothetical protein CVE22_06655, partial [Pseudomonas syringae pv. actinidiae].    | GCA_009903115.1 |
| NBW14976.1 | REase+TPR+GreAB-C+PIN*→                                                                                                      | REase+TPR+GreAB-C+PIN     | 1102 | EBR82_43945  | Alphaproteobacteria   | Caulobacteraceae bacterium               | MAG: hypothetical protein EBR82_43945, partial [Caulobacteraceae bacterium].        | GCA_009924585.1 |
| NCC04365.1 | REase+TPR+GreAB-C+PIN*→                                                                                                      | REase+TPR+GreAB-C+PIN     | 1308 | EOM37_10050  | Proteobacteria        | Proteobacteria bacterium                 | MAG: tetratricopeptide repeat protein [Proteobacteria bacterium].                   | GCA_009929575.1 |
| NCN59296.1 | <-CITB-HTH+LexA-protease  TPR+GreAB-C+PIN*→                                                                                  | TPR+GreAB-C+PIN           | 1274 | GW940_05255  | Bacteria              | Candidatus Microgenomates bacterium      | MAG: hypothetical protein GW940_05255 [Candidatus Microgenomates bacterium].        | GCA_009992065.1 |
| NCO24709.1 | TPR+GreAB-C+PIN*→                                                                                                            | TPR+GreAB-C+PIN           | 415  | GW897_06315  | unclassified Bacteria | bacterium                                | MAG: hypothetical protein GW897_06315 [bacterium].                                  | GCA_009992775.1 |
| NEZ58684.1 | TPR+TPR→ TPR+TPR→ TPR+TPR→ TPR+TPR→ TPR+TPR→ TPR→ TPR→ PNPase+TPR+GreAB-C+PIN*→?→   <-TPR+TPR                                | PNPase+TPR+GreAB-C+PIN    | 1392 | DXZ20_24195  | Cyanobacteria         | Leptolyngbyaceae cyanobacterium CCMR0081 | hypothetical protein DXZ20_24195 [Leptolyngbyaceae cyanobacterium CCMR0081].        | GCA_011009555.1 |
| NEZ64367.1 | TPR+TPR→ TPR+TPR→ TPR+TPR→ TPR+TPR→ TPR+TPR→ TPR+TPR→ TPR+TPR→ PNPase+TPR+GreAB-C+PIN*→?→   <-TPR+TPR<-TPR+TPR<-?<-TIR PIN*→ | PNPase+TPR+GreAB-C+PIN    | 1392 | D0962_16475  | Cyanobacteria         | Leptolyngbyaceae cyanobacterium CCMR0082 | hypothetical protein D0962_16475 [Leptolyngbyaceae cyanobacterium CCMR0082].        | GCA_011009535.1 |
| NHI06604.1 |                                                                                                                              | PIN                       | 211  | STPH2_1967   | Actinobacteria        | Streptomyces sp. KO7888                  | hypothetical protein STPH2_1967 [Streptomyces sp. KO7888].                          | GCA_011317205.1 |
| NHK99992.1 | TPR+GreAB-C+PIN*→                                                                                                            | TPR+GreAB-C+PIN           | 911  | G7087_16540  | Betaproteobacteria    | Rubrivivax benzoatilyticus               | hypothetical protein G7087_16540 [Rubrivivax benzoatilyticus].                      | GCA_011365705.1 |
| NJN11600.1 | TPR+GreAB-C+PIN*→                                                                                                            | TPR+GreAB-C+PIN           | 298  | HC815_27960  | Cyanobacteria         | Richelia sp. RM1_1_1                     | MAG: hypothetical protein HC815_27960 [Richelia sp. RM1_1_1].                       | GCA_012032385.1 |
| NJO54209.1 | REase+TPR+TPR+GreAB-C+PIN*→                                                                                                  | REase+TPR+TPR+GreAB-C+PIN | 1338 | HC829_04580  | Bacteroidetes         | Bacteroidales bacterium                  | MAG: hypothetical protein HC829_04580 [Bacteroidales bacterium].                    | GCA_012033435.1 |
| NKI94745.1 | REase+TPR+GreAB-C+PIN*→                                                                                                      | REase+TPR+GreAB-C+PIN     | 1340 | FHT26_002685 | Betaproteobacteria    | Rhizobacter sp. SG703                    | tetratricopeptide (TPR) repeat protein [Rhizobacter sp. SG703].                     | GCA_012275445.1 |
| NLD36189.1 | REase+TPR+PIN*→                                                                                                              | REase+TPR+PIN             | 1360 | GX654_04895  | Deltaproteobacteria   | Desulfatiglans sp.                       | MAG: tetratricopeptide repeat protein [Desulfatiglans sp.].                         | GCA_012513605.1 |
| NLD38959.1 | TPR+PIN*→                                                                                                                    | TPR+PIN                   | 1143 | GX654_19035  | Deltaproteobacteria   | Desulfatiglans sp.                       | MAG: tetratricopeptide repeat protein [Desulfatiglans sp.].                         | GCA_012513605.1 |
| NLD90744.1 | PNPase+TPR+GreAB-C+PIN*→                                                                                                     | PNPase+TPR+GreAB-C+PIN    | 1613 | GX634_10460  | Lentisphaerae         | Lentisphaerae bacterium                  | MAG: hypothetical protein GX634_10460 [Lentisphaerae bacterium].                    | GCA_012514035.1 |
| NLE27049.1 | SIR2+TPR+GreAB-C+PIN*→                                                                                                       | SIR2+TPR+GreAB-C+PIN      | 1448 | GX625_17245  | Firmicutes            | Clostridiaceae bacterium                 | MAG: hypothetical protein GX625_17245 [Clostridiaceae bacterium].                   | GCA_012514215.1 |
| NLE28033.1 | TPR+GreAB-C+PIN*→                                                                                                            | TPR+GreAB-C+PIN           | 758  | GX625_22395  | Firmicutes            | Clostridiaceae bacterium                 | MAG: hypothetical protein GX625_22395, partial [Clostridiaceae bacterium].          | GCA_012514215.1 |
| NLG15547.1 | TPR+GreAB-C+PIN*→                                                                                                            | TPR+GreAB-C+PIN           | 1341 | GX561_15255  | Lentisphaerae         | Lentisphaerae bacterium                  | MAG: hypothetical protein GX561_15255 [Lentisphaerae bacterium].                    | GCA_012515425.1 |
| NLX50682.1 | REase+TPR+GreAB-C+PIN*→ PSE→?→?→ REase+SNF2→                                                                                 | REase+TPR+GreAB-C+PIN     | 1299 | GXY72_01105  | Deltaproteobacteria   | Deltaproteobacteria bacterium            | MAG: hypothetical protein GXY72_01105 [Deltaproteobacteria bacterium].              | GCA_012729055.1 |
| NMQ30291.1 | REase+TPR+GreAB-C+PIN*→                                                                                                      | REase+TPR+GreAB-C+PIN     | 1072 | E4Q23_22545  | Betaproteobacteria    | Candidatus Accumulibacter phosphatis     | hypothetical protein E4Q23_22545, partial [Candidatus Accumulibacter phosphatis].   | GCA_012939955.1 |
| NOT34484.1 | GreAB*→                                                                                                                      | GreAB                     | 904  | HOP12_09975  | Bacteria              | Candidatus Eisenbacteria bacterium       | MAG: hypothetical protein HOP12_09975 [Candidatus Eisenbacteria bacterium].         | GCA_013140805.1 |

| acc        | operon                         | architecture              | len  | gen.name    | taxend              | species                                                    | define                                                                                              | gca             |
|------------|--------------------------------|---------------------------|------|-------------|---------------------|------------------------------------------------------------|-----------------------------------------------------------------------------------------------------|-----------------|
| NOU31123.1 | TPR+GreAB-C+PIN*→              | TPR+GreAB-C+PIN           | 536  | HOO96_24755 | Deltaproteobacteria | Polyangiaceae bacterium                                    | MAG: hypothetical protein HOO96_24755 [Polyangiaceae bacterium].                                    | GCA_013141295.1 |
| NQE54029.1 | REase+TPR+GreAB-C+PIN*→        | REase+TPR+GreAB-C+PIN     | 1291 | lapB_1      | Euryarchaeota       | ANME-1 cluster archaeon GoMg3.2                            | Lipopolysaccharide assembly protein B [ANME-1 cluster archaeon GoMg3.2].                            | GCA_013180565.1 |
| NQV22738.1 | REase+TPR+GreAB-C+PIN*→        | REase+TPR+GreAB-C+PIN     | 1245 | HQ518_00080 | Planctomycetes      | Rhodopirellula sp.                                         | MAG: hypothetical protein HQ518_00080 [Rhodopirellula sp.].                                         | GCA_013203845.1 |
| NQY79025.1 | TPR+PIN*→                      | TPR+PIN                   | 1272 | HRT47_01810 | Terrabacteria group | Candidatus Caenarcaniphilales bacterium                    | MAG: hypothetical protein HRT47_01810 [Candidatus Caenarcaniphilales bacterium].                    | GCA_013216135.1 |
| NQZ35237.1 | TPR+GreAB-C+PIN*→              | TPR+GreAB-C+PIN           | 1069 | HRT58_06210 | Bacteroidetes       | Crocinitomicaceae bacterium                                | MAG: hypothetical protein HRT58_06210 [Crocinitomicaceae bacterium].                                | GCA_013214785.1 |
| NQZ40471.1 | HetE-N1→ TPR+GreAB-C+PIN*→     | TPR+GreAB-C+PIN           | 1088 | HRT96_10385 | Gammaproteobacteria | Moritella sp.                                              | MAG: hypothetical protein HRT96_10385 [Moritella sp.].                                              | GCA_013215705.1 |
| NSZ07544.1 | TPR+GreAB-C+PIN*→              | TPR+GreAB-C+PIN           | 1180 | G6M14_14320 | Alphaproteobacteria | Agrobacterium tumefaciens                                  | hypothetical protein G6M14_14320 [Agrobacterium tumefaciens].                                       | GCA_013318315.1 |
| NTV22000.1 | TPR+PIN*→                      | TPR+PIN                   | 942  | HGB03_00315 | Bacteria            | Candidatus Yonathbacteria bacterium                        | MAG: hypothetical protein HGB03_00315 [Candidatus Yonathbacteria bacterium].                        | GCA_013334825.1 |
| NTW26872.1 | REase→ REase+TPR+GreAB-C+PIN*→ | REase+TPR+GreAB-C+PIN     | 1310 | HGA36_00950 | Bacteria            | Candidatus Moranbacteria bacterium                         | MAG: hypothetical protein HGA36_00950 [Candidatus Moranbacteria bacterium].                         | GCA_013336225.1 |
| NTZ52560.1 | HetE-N1→?→ TPR+GreAB-C+PIN*→   | TPR+GreAB-C+PIN           | 513  | FCH32_20020 | Gammaproteobacteria | Citrobacter gillenii                                       | hypothetical protein FCH32_20020 [Citrobacter gillenii].                                            | GCA_013337685.1 |
| NWE92806.1 | PIN*→                          | PIN                       | 344  | HX893_32300 | Gammaproteobacteria | Pseudomonas reactans                                       | hypothetical protein HX893_32300, partial [Pseudomonas reactans].                                   | GCA_013386215.1 |
| NWO07476.1 | HetE-N1→ TPR+GreAB-C+PIN*→     | TPR+GreAB-C+PIN           | 1130 | HLX50_17830 | Gammaproteobacteria | Alteromonadaceae bacterium                                 | MAG: hypothetical protein HLX50_17830 [Alteromonadaceae bacterium].                                 | GCA_013393545.1 |
| OBH13398.1 | X+PIN*→                        | X+PIN                     | 755  | A5695_13915 | Actinobacteria      | Mycobacterium sp. E1747                                    | hypothetical protein A5695_13915 [Mycobacterium sp. E1747].                                         | GCA_001667775.1 |
| OBR53101.1 | REase+TPR+GreAB-C+PIN*→        | REase+TPR+GreAB-C+PIN     | 1277 | A6456_09045 | Betaproteobacteria  | Paraburkholderia tropica                                   | hypothetical protein A6456_09045 [Paraburkholderia tropica].                                        | GCA_001673675.1 |
| OCX17561.1 | REase+TPR+TPR+GreAB-C+PIN*→    | REase+TPR+TPR+GreAB-C+PIN | 1207 | QV13_12440  | Alphaproteobacteria | Mesorhizobium hungaricum                                   | hypothetical protein QV13_12440 [Mesorhizobium hungaricum].                                         | GCA_001705425.1 |
| ODM45291.1 | TPR+GreAB-C+PIN*→              | TPR+GreAB-C+PIN           | 1187 | A9320_11670 | Alphaproteobacteria | Ruegeria sp. PBVC088                                       | hypothetical protein A9320_11670 [Ruegeria sp. PBVC088].                                            | GCA_001717995.1 |
| ODS63626.1 | GreAB-C+PIN*→                  | GreAB-C+PIN               | 516  | ABS37_11570 | Betaproteobacteria  | Acidovorax sp. SCN 65-108                                  | MAG: hypothetical protein ABS37_11570 [Acidovorax sp. SCN 65-108].                                  | GCA_001724055.1 |
| ODT73806.1 | REase+TPR+TPR+GreAB-C+PIN*→    | REase+TPR+TPR+GreAB-C+PIN | 1296 | ABS76_38455 | Alphaproteobacteria | Pelagibacterium sp. SCN 64-44                              | MAG: hypothetical protein ABS76_38455 [Pelagibacterium sp. SCN 64-44].                              | GCA_001724955.1 |
| OEJ21925.1 | REase+PIN*→                    | REase+PIN                 | 1260 | AR457_38995 | Actinobacteria      | Streptomyces agglomeratus                                  | hypothetical protein AR457_38995 [Streptomyces agglomeratus].                                       | GCA_001746465.1 |
| OFX87846.1 | TPR+GreAB-C+PIN*→              | TPR+GreAB-C+PIN           | 1236 | A2X00_15495 | Bacteroidetes       | Bacteroidetes bacterium GWE2_32_14                         | MAG: hypothetical protein A2X00_15495 [Bacteroidetes bacterium GWE2_32_14].                         | GCA_001768405.1 |
| OFY15991.1 | TPR+GreAB-C+PIN*→              | TPR+GreAB-C+PIN           | 1237 | A2X02_04985 | Bacteroidetes       | Bacteroidetes bacterium GWF2_29_10                         | MAG: hypothetical protein A2X02_04985 [Bacteroidetes bacterium GWF2_29_10].                         | GCA_001768555.1 |
| OGC02499.1 | PIN*→                          | PIN                       | 178  | A2V82_02050 | Bacteria            | candidate division KSB1 bacterium RBG_16_48_16             | MAG: hypothetical protein A2V82_02050 [candidate division KSB1 bacterium RBG_16_48_16].             | GCA_001771235.1 |
| OGH88116.1 | TPR+GreAB-C+PIN*→              | TPR+GreAB-C+PIN           | 1191 | A3J93_00010 | Bacteria            | Candidatus Magasanikbacteria bacterium RIFOXYC2_FULL_42_28 | MAG: hypothetical protein A3J93_00010 [Candidatus Magasanikbacteria bacterium RIFOXYC2_FULL_42_28]. | GCA_001784435.1 |
| OGI36016.1 | TRD+TRD→?→?→?→ TPR+PIN*→       | TPR+PIN                   | 1186 | A2259_01680 | Bacteria            | Candidatus Moranbacteria bacterium RIFOXYA2_FULL_43_15     | MAG: hypothetical protein A2259_01680 [Candidatus Moranbacteria bacterium RIFOXYA2_FULL_43_15].     | GCA_001784835.1 |

| acc        | operon                                      | architecture              | len  | gen.name    | taxend              | species                                                                   | define                                                                                                             | gca             |
|------------|---------------------------------------------|---------------------------|------|-------------|---------------------|---------------------------------------------------------------------------|--------------------------------------------------------------------------------------------------------------------|-----------------|
| OGS08035.1 | TPR+GreAB-C+PIN*→                           | TPR+GreAB-C+PIN           | 1270 | A2270_03040 | Elusimicrobia       | Elusimicrobia bacterium RIFOXYA12_FULL_51_18                              | MAG: hypothetical protein A2270_03040 [Elusimicrobia bacterium RIFOXYA12_FULL_51_18].                              | GCA_001800245.1 |
| OGU66359.1 | REase+TPR+GreAB-C+PIN*→                     | REase+TPR+GreAB-C+PIN     | 1303 | A2W30_02620 | Ignavibacteriae     | Ignavibacteria bacterium RBG_16_36_9                                      | MAG: hypothetical protein A2W30_02620 [Ignavibacteria bacterium RBG_16_36_9].                                      | GCA_001802895.1 |
| OGU77131.1 | PIN*→                                       | PIN                       | 573  | A2W11_11280 | Ignavibacteriae     | Ignavibacteria bacterium RBG_16_35_7                                      | MAG: hypothetical protein A2W11_11280 [Ignavibacteria bacterium RBG_16_35_7].                                      | GCA_001802885.1 |
| OIP66815.1 | TPR+GreAB-C+PIN*→                           | TPR+GreAB-C+PIN           | 402  | AUK42_07760 | Bacteria            | Candidatus Atribacteria bacterium CG2_30_33_13                            | MAG: hypothetical protein AUK42_07760 [Candidatus Atribacteria bacterium CG2_30_33_13].                            | GCA_001873345.1 |
| OJV65414.1 | HetE-N1→ HetE-N1+TPR+GreAB-C+PIN*→          | HetE-N1+TPR+GreAB-C+PIN   | 1117 | BGO35_21125 | Betaproteobacteria  | Burkholderiales bacterium 64-34                                           | MAG: hypothetical protein BGO35_21125 [Burkholderiales bacterium 64-34].                                           | GCA_001897585.1 |
| OJW35018.1 | TPR+GreAB-C+PIN*→   <-REase                 | TPR+GreAB-C+PIN           | 1246 | BGO54_02365 | Bacteroidetes       | Sphingobacteriales bacterium 46-32                                        | MAG: hypothetical protein BGO54_02365 [Sphingobacteriales bacterium 46-32].                                        | GCA_001898485.1 |
| OJW61617.1 | TIR→?→?→ TPR+GreAB-C+PIN*→                  | TPR+GreAB-C+PIN           | 1114 | BGO65_09490 | Alphaproteobacteria | Afipia sp. 64-13                                                          | MAG: hypothetical protein BGO65_09490 [Afipia sp. 64-13].                                                          | GCA_001897755.1 |
| OMR67119.1 | TPR+GreAB-C+PIN*→   <-HTH+HTH               | TPR+GreAB-C+PIN           | 879  | AQ727_25970 | Betaproteobacteria  | Burkholderia pseudomallei                                                 | hypothetical protein AQ727_25970 [Burkholderia pseudomallei].                                                      | GCA_001976575.1 |
| OSN14318.1 | REase+TPR+GreAB-C+PIN*→                     | REase+TPR+GreAB-C+PIN     | 1486 | BV340_04459 | Gammaproteobacteria | Pseudomonas syringae pv. actinidiae                                       | hypothetical protein BV340_04459 [Pseudomonas syringae pv. actinidiae].                                            | GCA_002111665.1 |
| OSN30099.1 | REase+TPR+GreAB-C+PIN*→                     | REase+TPR+GreAB-C+PIN     | 1336 | BV342_05184 | Gammaproteobacteria | Pseudomonas syringae pv. actinidiae                                       | hypothetical protein BV342_05184 [Pseudomonas syringae pv. actinidiae].                                            | GCA_002111745.1 |
| OUC14796.1 | TPR+TPR+PNPase→ PNPase+TPR+GreAB-C+PIN*→    | PNPase+TPR+GreAB-C+PIN    | 1396 | B0A82_10750 | Cyanobacteria       | Alkalinema sp. CACIAM 70d                                                 | MAG: hypothetical protein B0A82_10750 [Alkalinema sp. CACIAM 70d].                                                 | GCA_002148405.1 |
| OUR78422.1 | TPR+GreAB-C+PIN*→                           | TPR+GreAB-C+PIN           | 1191 | A9Q83_07770 | Alphaproteobacteria | Alphaproteobacteria bacterium 46_93_T64                                   | hypothetical protein A9Q83_07770 [Alphaproteobacteria bacterium 46_93_T64].                                        | GCA_002163135.1 |
| OWZ89184.1 | REase+TPR+TPR+GreAB-C+PIN*→                 | REase+TPR+TPR+GreAB-C+PIN | 1352 | B9J07_34245 | Alphaproteobacteria | Sinorhizobium sp. LM21                                                    | hypothetical protein B9J07_34245 [Sinorhizobium sp. LM21].                                                         | GCA_002216665.1 |
| OYD66813.1 | REase+TPR+GreAB-C+PIN*→?→ Trypsin→          | REase+TPR+GreAB-C+PIN     | 1243 | BDB13_0310  | Actinobacteria      | Rhodococcus sp. OK302                                                     | uncharacterized protein DUF4365 [Rhodococcus sp. OK302].                                                           | GCA_002245895.1 |
| OYW86349.1 | TPR+GreAB-C+PIN*→                           | TPR+GreAB-C+PIN           | 629  | B7Z22_06790 | Alphaproteobacteria | Hyphomonas sp. 32-62-5                                                    | MAG: hypothetical protein B7Z22_06790, partial [Hyphomonas sp. 32-62-5].                                           | GCA_002280065.1 |
| OYX15563.1 | REase+TPR+GreAB-C+PIN*→                     | REase+TPR+GreAB-C+PIN     | 1211 | B7Z15_00100 | Alphaproteobacteria | Rhizobiales bacterium 32-66-8                                             | MAG: hypothetical protein B7Z15_00100 [Rhizobiales bacterium 32-66-8].                                             | GCA_002280205.1 |
| OZB15488.1 | REase+TPR+GreAB-C+PIN*→                     | REase+TPR+GreAB-C+PIN     | 1294 | B7X53_11340 | Alphaproteobacteria | Hyphomonas sp. 34-62-18                                                   | MAG: hypothetical protein B7X53_11340 [Hyphomonas sp. 34-62-18].                                                   | GCA_002282565.1 |
| PBC66280.1 | X+PIN*→                                     | X+PIN                     | 685  | BX265_8343  | Actinobacteria      | Streptomyces sp. TLI_235                                                  | hypothetical protein BX265_8343 [Streptomyces sp. TLI_235].                                                        | GCA_002300355.1 |
| PCJ29538.1 | REase+TPR+PIN*→                             | REase+TPR+PIN             | 1292 | COA99_19375 | Gammaproteobacteria | Moraxellaceae bacterium                                                   | MAG: hypothetical protein COA99_19375 [Moraxellaceae bacterium].                                                   | GCA_002402125.1 |
| PDQ17661.1 | REase+TPR+TPR+GreAB-C+PIN*→                 | REase+TPR+TPR+GreAB-C+PIN | 1265 | CN311_28810 | Alphaproteobacteria | Mesorhizobium sanjuanii                                                   | hypothetical protein CN311_28810 [Mesorhizobium sanjuanii].                                                        | GCA_002529485.1 |
| PGS40120.1 | TPR+PIN*→                                   | TPR+PIN                   | 1006 | COC58_18130 | Firmicutes          | Bacillus cereus                                                           | hypothetical protein COC58_18130 [Bacillus cereus].                                                                | GCA_002577165.1 |
| PIG41510.1 | TPR+PIN*→                                   | TPR+PIN                   | 1214 | CLZ78_0083  | Actinobacteria      | Streptomyces sp. 61                                                       | hypothetical protein CLZ78_0083 [Streptomyces sp. 61].                                                             | GCA_002754535.1 |
| PIP62053.1 | <-CITB-HTH+LexA-protease  TPR+GreAB-C+PIN*→ | TPR+GreAB-C+PIN           | 1272 | COW99_00715 | Bacteria            | Candidatus Roizmanbacteria bacterium CG22_combo_CG10-13_8_21_14_all_38_20 | MAG: hypothetical protein COW99_00715 [Candidatus Roizmanbacteria bacterium CG22_combo_CG10-13_8_21_14_all_38_20]. | GCA_002786635.1 |
| PIU06549.1 | TPR+GreAB-C+PIN*→                           | TPR+GreAB-C+PIN           | 1132 | COT56_09580 | Alphaproteobacteria | Methylobacterium sp. CG09_land_8_20_14_0_10_71_15                         | MAG: hypothetical protein COT56_09580 [Methylobacterium sp. CG09_land_8_20_14_0_10_71_15].                         | GCA_002778835.1 |



| acc        | operon                                      | architecture              | len  | gen.name     | taxend              | species                                                | define                                                                                          | gca             |
|------------|---------------------------------------------|---------------------------|------|--------------|---------------------|--------------------------------------------------------|-------------------------------------------------------------------------------------------------|-----------------|
| PKM50370.1 | TPR+PIN*→                                   | TPR+PIN                   | 1214 | CVV02_11355  | Firmicutes          | Firmicutes bacterium HGW-Firmicutes-7                  | MAG: hypothetical protein CVV02_11355 [Firmicutes bacterium HGW-Firmicutes-7].                  | GCA_002841375.1 |
| PKN75416.1 | TPR+GreAB-C+PIN*→                           | TPR+GreAB-C+PIN           | 1116 | CVU49_03915  | FCB group           | Candidatus Cloacimonetes bacterium HGW-Cloacimonetes-2 | MAG: hypothetical protein CVU49_03915 [Candidatus Cloacimonetes bacterium HGW-Cloacimonetes-2]. | GCA_002842035.1 |
| PKO82710.1 | HetE-N1→ HetE-N1+TPR+GreAB-C+PIN*→          | HetE-N1+TPR+GreAB-C+PIN   | 1126 | CVU19_00260  | Betaproteobacteria  | Betaproteobacteria bacterium HGW-Betaproteobacteria-13 | MAG: hypothetical protein CVU19_00260 [Betaproteobacteria bacterium HGW-Betaproteobacteria-13]. | GCA_002842325.1 |
| PLP59030.1 | REase+TPR+TPR+GreAB-C+PIN*→                 | REase+TPR+TPR+GreAB-C+PIN | 1226 | CYK37_11065  | Alphaproteobacteria | Mesorhizobium loti                                     | hypothetical protein CYK37_11065 [Mesorhizobium loti].                                          | GCA_002858745.1 |
| PLX86308.1 | TPR+GreAB-C+PIN*→                           | TPR+GreAB-C+PIN           | 1333 | C0617_01645  | Deltaproteobacteria | Desulfuromonas sp.                                     | MAG: hypothetical protein C0617_01645 [Desulfuromonas sp.].                                     | GCA_002868845.1 |
| PLY41243.1 | TPR+GreAB-C+PIN*→                           | TPR+GreAB-C+PIN           | 1106 | CSZ94_17070  | Betaproteobacteria  | Janthinobacterium sp. ROICE36                          | hypothetical protein CSZ94_17070 [Janthinobacterium sp. ROICE36].                               | GCA_002869965.1 |
| PMJ73057.1 | HetE-N1→?→ GreAB-C*→                        | GreAB-C                   | 461  | BCU23_16040  | Gammaproteobacteria | Vibrio splendidus                                      | hypothetical protein BCU23_16040 [Vibrio splendidus].                                           | GCA_002877525.1 |
| POU10505.1 | PIN*→                                       | PIN                       | 385  | C3420_16980  | Gammaproteobacteria | Acinetobacter sp. ACNIH3                               | hypothetical protein C3420_16980 [Acinetobacter sp. ACNIH3].                                    | GCA_002918965.1 |
| PQZ99140.1 | TPR+PIN*→                                   | TPR+PIN                   | 932  | CQ019_16410  | Actinobacteria      | Arthrobacter sp. MYb229                                | hypothetical protein CQ019_16410 [Arthrobacter sp. MYb229].                                     | GCA_002975405.1 |
| PRY64434.1 | HetE-N1→ TPR+GreAB-C+PIN*→                  | TPR+GreAB-C+PIN           | 1090 | B0H98_10595  | Gammaproteobacteria | Halomonas songnenensis                                 | hypothetical protein B0H98_10595 [Halomonas songnenensis].                                      | GCA_003002925.1 |
| PSL26440.1 | HNH+TPR+GreAB-C+PIN*→                       | HNH+TPR+GreAB-C+PIN       | 1234 | CLV42_111154 | Bacteroidetes       | Chitinophaga ginsengisoli                              | HNH endonuclease [Chitinophaga ginsengisoli].                                                   | GCA_003014595.1 |
| PTH81074.1 | TPR+GreAB-C+PIN*→                           | TPR+GreAB-C+PIN           | 851  | DAA48_11040  | Gammaproteobacteria | Aeromonas veronii                                      | hypothetical protein DAA48_11040 [Aeromonas veronii].                                           | GCA_003036425.1 |
| PTL60251.1 | X+PIN*→                                     | X+PIN                     | 1319 | C7Y72_11685  | Actinobacteria      | Conexibacter sp. Seoho-28                              | hypothetical protein C7Y72_11685 [Conexibacter sp. Seoho-28].                                   | GCA_003044185.1 |
| PTX57421.1 | TPR+GreAB-C+PIN*→                           | TPR+GreAB-C+PIN           | 1184 | C8N43_2089   | Alphaproteobacteria | Litoreibacter ponti                                    | hypothetical protein C8N43_2089 [Litoreibacter ponti].                                          | GCA_003054285.1 |
| PWM31885.1 | GreAB*→                                     | GreAB                     | 675  | DBX55_01895  | Verrucomicrobia     | Verrucomicrobia bacterium                              | MAG: transcription elongation factor GreAB [Verrucomicrobia bacterium].                         | GCA_003343565.1 |
| PWM77364.1 | NACHT→?→ X+PIN*→ HTH→                       | X+PIN                     | 733  | DBY32_08445  | Firmicutes          | Phascolarctobacterium sp.                              | MAG: hypothetical protein DBY32_08445 [Phascolarctobacterium sp.].                              | GCA_003150755.1 |
| PWM80532.1 | TPR+GreAB-C+PIN*→                           | TPR+GreAB-C+PIN           | 1185 | DBY41_05620  | Firmicutes          | Clostridium sp.                                        | MAG: hypothetical protein DBY41_05620 [Clostridium sp.].                                        | GCA_003150745.1 |
| PZR80846.1 | BirA-HTH→ HEPN→ REase+TPR+TPR+GreAB-C+PIN*→ | REase+TPR+TPR+GreAB-C+PIN | 1131 | DI537_39015  | Gammaproteobacteria | Pseudomonas stutzeri                                   | MAG: hypothetical protein DI537_39015, partial [Pseudomonas stutzeri].                          | GCA_003243385.1 |
| PZR82088.1 | TPR+GreAB-C+PIN*→                           | TPR+GreAB-C+PIN           | 1139 | DI537_37240  | Gammaproteobacteria | Pseudomonas stutzeri                                   | MAG: hypothetical protein DI537_37240 [Pseudomonas stutzeri].                                   | GCA_003243385.1 |
| PZU06315.1 | REase+TPR+GreAB-C+PIN*→                     | REase+TPR+GreAB-C+PIN     | 1323 | DI605_19340  | Alphaproteobacteria | Sphingomonas sp.                                       | MAG: hypothetical protein DI605_19340 [Sphingomonas sp.].                                       | GCA_003248515.1 |
| PZU12119.1 | TPR+GreAB-C+PIN*→                           | TPR+GreAB-C+PIN           | 859  | DI622_15520  | Bacteroidetes       | Chryseobacterium sp.                                   | MAG: hypothetical protein DI622_15520, partial [Chryseobacterium sp.].                          | GCA_003248465.1 |
| QDS92471.1 | REase+TPR+GreAB-C+PIN*→                     | REase+TPR+GreAB-C+PIN     | 1250 | FF011L_12140 | Planctomycetes      | Planctomycetes bacterium FF011L                        | hypothetical protein FF011L_12140 [Planctomycetes bacterium FF011L].                            | GCA_007741495.1 |
| QDT50511.1 | REase+TPR+GreAB-C+PIN→ TPR+GreAB-C+PIN*→    | TPR+GreAB-C+PIN           | 495  | Pan258_45900 | Planctomycetes      | Symmachiella dynata                                    | hypothetical protein Pan258_45900 [Symmachiella dynata].                                        | GCA_007744975.1 |
| QDV12361.1 | REase+TPR+GreAB-C+PIN*→                     | REase+TPR+GreAB-C+PIN     | 1246 | CA51_22440   | Planctomycetes      | Rosistilla oblonga                                     | Tetratricopeptide repeat protein [Rosistilla oblonga].                                          | GCA_007751715.1 |
| QDV84971.1 | TPR+GreAB-C+PIN*→                           | TPR+GreAB-C+PIN           | 954  | TBK1r_39230  | Planctomycetes      | Planctomycetes bacterium TBK1r                         | hypothetical protein TBK1r_39230 [Planctomycetes bacterium TBK1r].                              | GCA_007753675.1 |

| acc        | operon                                    | architecture              | len  | gen.name     | taxend              | species                                | define                                                                          | gca             |
|------------|-------------------------------------------|---------------------------|------|--------------|---------------------|----------------------------------------|---------------------------------------------------------------------------------|-----------------|
| QFS96076.1 | TPR+GreAB-C+PIN*→                         | TPR+GreAB-C+PIN           | 1184 | FIV06_01510  | Alphaproteobacteria | Labrenzia sp. THAF191b                 | hypothetical protein FIV06_01510 [Labrenzia sp. THAF191b].                      | GCA_009363315.1 |
| QHB84489.1 | HetE-N1→ TPR+GreAB-C+PIN*→                | TPR+GreAB-C+PIN           | 1094 | GIS01_21340  | Gammaproteobacteria | Aeromonas veronii                      | hypothetical protein GIS01_21340 [Aeromonas veronii].                           | GCA_009833025.1 |
| QIC10441.1 | HetE-N1→ TPR+GreAB-C+PIN*→                | TPR+GreAB-C+PIN           | 1069 | PmVP161_2026 | Gammaproteobacteria | Pasteurella multocida                  | hypothetical protein PmVP161_2026 [Pasteurella multocida].                      | GCA_011390865.1 |
| QND19257.1 | REase+TPR+TPR+GreAB-C+PIN*→               | REase+TPR+TPR+GreAB-C+PIN | 1348 | HB774_02700  | Alphaproteobacteria | Rhizobium leguminosarum bv. viciae     | hypothetical protein HB774_02700 [Rhizobium leguminosarum bv. viciae].          | GCA_014189655.1 |
| QPL52208.1 | HetE-N1→ TPR+GreAB-C+PIN*→                | TPR+GreAB-C+PIN           | 1130 | I3X05_08770  | Gammaproteobacteria | Vibrio navarrensis                     | hypothetical protein I3X05_08770 [Vibrio navarrensis].                          | GCA_015767675.1 |
| QQO85647.1 | HetE-N1→ TPR+GreAB-C+PIN*→                | TPR+GreAB-C+PIN           | 1089 | D7032_21665  | Gammaproteobacteria | Shewanella algae                       | hypothetical protein D7032_21665 [Shewanella algae].                            | -               |
| QQR55448.1 | X+PIN*→                                   | X+PIN                     | 1237 | IPG41_02740  | Bacteria            | Candidatus Peregrinibacteria bacterium | MAG: hypothetical protein IPG41_02740 [Candidatus Peregrinibacteria bacterium]. | GCA_016699145.1 |
| RAZ30556.1 | TPR+GreAB-C+PIN*→                         | TPR+GreAB-C+PIN           | 1208 | DO944_13495  | Actinobacteria      | Microbacterium sp. SMR1                | hypothetical protein DO944_13495 [Microbacterium sp. SMR1].                     | GCA_003289625.1 |
| RBN51622.1 | TPR+GreAB-C+PIN*→                         | TPR+GreAB-C+PIN           | 1135 | DR980_00180  | Bacteroidetes       | Flavobacterium psychrolimnae           | hypothetical protein DR980_00180 [Flavobacterium psychrolimnae].                | GCA_003312425.1 |
| RBP77372.1 | TPR+GreAB-C+PIN*→                         | TPR+GreAB-C+PIN           | 1175 | DFO80_1601   | Alphaproteobacteria | Rhodobacter sp. 140A                   | hypothetical protein DFO80_1601, partial [Rhodobacter sp. 140A].                | GCA_003315475.1 |
| RCI79301.1 | TPR+GreAB-C+PIN*→                         | TPR+GreAB-C+PIN           | 630  | DNK03_13895  | Alphaproteobacteria | Brucella anthropi                      | hypothetical protein DNK03_13895 [Brucella anthropi].                           | GCA_003325675.1 |
| REJ78752.1 | TPR+GreAB-C+PIN*→   <-?<-?<-?<-REase+SNF2 | TPR+GreAB-C+PIN           | 1257 | DWQ32_08270  | Acidobacteria       | Acidobacteria bacterium                | MAG: hypothetical protein DWQ32_08270 [Acidobacteria bacterium].                | GCA_003385635.1 |
| REJ87566.1 | TPR+PIN*→                                 | TPR+PIN                   | 2085 | DWQ34_24785  | Planctomycetes      | Planctomycetes bacterium               | MAG: hypothetical protein DWQ34_24785 [Planctomycetes bacterium].               | GCA_003388575.1 |
| RGJ64387.1 | X+PIN*→ HTH→?→?→ HTH→                     | X+PIN                     | 1176 | DXD50_08885  | Firmicutes          | Dorea formicigenerans                  | hypothetical protein DXD50_08885 [Dorea formicigenerans].                       | GCA_003437395.1 |
| RGN88412.1 | X+PIN*→ HTH→?→?→ HTH→                     | X+PIN                     | 1176 | DXB36_13695  | Firmicutes          | Dorea formicigenerans                  | hypothetical protein DXB36_13695 [Dorea formicigenerans].                       | GCA_003439255.1 |
| RGR97298.1 | TM+TM+TPR+PIN*→                           | TM+TM+TPR+PIN             | 1206 | DWY20_07060  | Bacteroidetes       | Phocaeicola coprocola                  | hypothetical protein DWY20_07060 [Phocaeicola coprocola].                       | GCA_003458565.1 |
| RGS66838.1 | X+PIN*→ HTH→?→?→ HTH→                     | X+PIN                     | 766  | DWX78_14950  | Firmicutes          | Dorea formicigenerans                  | hypothetical protein DWX78_14950 [Dorea formicigenerans].                       | GCA_003458845.1 |
| RGY02630.1 | TPR+GreAB-C+PIN*→                         | TPR+GreAB-C+PIN           | 410  | DXA56_15985  | Firmicutes          | Blautia obeum                          | hypothetical protein DXA56_15985 [Blautia obeum].                               | GCA_003463085.1 |
| RGZ63692.1 | Mbetalac→ Trypsin→?→ TPR+PIN*→            | TPR+PIN                   | 1371 | DW979_12370  | Firmicutes          | Eubacterium sp. AM49-13BH              | hypothetical protein DW979_12370, partial [Eubacterium sp. AM49-13BH].          | GCA_003464165.1 |
| RHN14952.1 | X+PIN*→ HTH→?→?→ HTH→                     | X+PIN                     | 1175 | DWZ24_11335  | Firmicutes          | Dorea formicigenerans                  | hypothetical protein DWZ24_11335 [Dorea formicigenerans].                       | GCA_003475555.1 |
| RHV44852.1 | X+PIN*→                                   | X+PIN                     | 1229 | DXB47_09745  | Firmicutes          | Firmicutes bacterium OM04-13BH         | hypothetical protein DXB47_09745 [Firmicutes bacterium OM04-13BH].              | GCA_003481745.1 |
| RHZ93582.1 | TPR+GreAB-C+PIN*→                         | TPR+GreAB-C+PIN           | 924  | D1920_20895  | Alphaproteobacteria | Rhodopseudomonas palustris             | hypothetical protein D1920_20895 [Rhodopseudomonas palustris].                  | GCA_003547145.1 |
| RJT21930.1 | TPR+GreAB-C*→                             | TPR+GreAB-C               | 282  | D5I55_15915  | Alphaproteobacteria | Aestuariusphingobium litorale          | hypothetical protein D5I55_15915 [Aestuariusphingobium litorale].               | GCA_003602075.1 |
| RKE07817.1 | TPR+PIN*→                                 | TPR+PIN                   | 806  | C8E86_2653   | Actinobacteria      | Catellatospora citrea                  | hypothetical protein C8E86_2653 [Catellatospora citrea].                        | GCA_003610235.1 |
| RKG98095.1 | TPR+GreAB-C+PIN*→                         | TPR+GreAB-C+PIN           | 461  | D7X32_30660  | Deltaproteobacteria | Coralloccoccus carmarthensis           | hypothetical protein D7X32_30660 [Coralloccoccus carmarthensis].                | GCA_003611695.1 |
| RKS06034.1 | TPR+PIN*→ PAIREDC-HTH→                    | TPR+PIN                   | 1209 | DFP74_1655   | Actinobacteria      | Nocardiopsis sp. Huas11                | hypothetical protein DFP74_1655 [Nocardiopsis sp. Huas11].                      | GCA_003634495.1 |

| acc        | operon                                                    | architecture                 | len  | gen.name     | taxend                | species                                     | define                                                                           | gca             |
|------------|-----------------------------------------------------------|------------------------------|------|--------------|-----------------------|---------------------------------------------|----------------------------------------------------------------------------------|-----------------|
| RKU09109.1 | TPR+GreAB-C+PIN*→                                         | TPR+GreAB-C+PIN              | 1315 | C6502_13840  | Bacteria              | Candidatus Poribacteria bacterium           | MAG: hypothetical protein C6502_13840 [Candidatus Poribacteria bacterium].       | GCA_003635265.1 |
| RKW53732.1 | X+PIN*→                                                   | X+PIN                        | 1207 | D8H95_11955  | Firmicutes            | Lachnospiraceae bacterium                   | MAG: hypothetical protein D8H95_11955 [Lachnospiraceae bacterium].               | GCA_003640285.1 |
| RKY60125.1 | PIN*→                                                     | PIN                          | 174  | DRP94_01435  | FCB group             | Candidatus Latescibacteria bacterium        | MAG: DUF3368 domain-containing protein [Candidatus Latescibacteria bacterium].   | GCA_003645885.1 |
| RMB87410.1 | TPR+PIN*→                                                 | TPR+PIN                      | 746  | CTZ28_00010  | Actinobacteria        | Streptomyces shenzhenensis                  | hypothetical protein CTZ28_00010 [Streptomyces shenzhenensis].                   | GCA_003688995.1 |
| RMQ50424.1 | REase+TPR+GreAB-C+PIN*→                                   | REase+TPR+GreAB-C+PIN        | 1489 | ALQ04_05433  | Gammaproteobacteria   | Pseudomonas cichorii                        | hypothetical protein ALQ04_05433 [Pseudomonas cichorii].                         | GCA_003700275.1 |
| RMV01228.1 | REase+TPR+GreAB-C+PIN*→                                   | REase+TPR+GreAB-C+PIN        | 1486 | ALP20_200053 | Gammaproteobacteria   | Pseudomonas coronafaciens pv. coronafaciens | hypothetical protein ALP20_200053 [Pseudomonas coronafaciens pv. coronafaciens]. | GCA_003702885.1 |
| RMV06369.1 | TPR+GreAB-C+PIN*→                                         | TPR+GreAB-C+PIN              | 904  | ALP17_05452  | Gammaproteobacteria   | Pseudomonas savastanoi                      | hypothetical protein ALP17_05452 [Pseudomonas savastanoi].                       | GCA_003702965.1 |
| RMV08832.1 | REase→ TPR+GreAB-C+PIN*→                                  | TPR+GreAB-C+PIN              | 881  | ALP16_05399  | Gammaproteobacteria   | Pseudomonas savastanoi                      | hypothetical protein ALP16_05399, partial [Pseudomonas savastanoi].              | GCA_003702985.1 |
| RNA68542.1 | <-REase  TPR+PIN*→                                        | TPR+PIN                      | 999  | EBO34_00790  | Firmicutes            | Bacillus sp. KQ-3                           | hypothetical protein EBO34_00790 [Bacillus sp. KQ-3].                            | GCA_003710255.1 |
| RND30553.1 | HetE-N1→ HetE-N1+TPR+GreAB-C+PIN*→                        | HetE-N1+TPR+GreAB-C+PIN      | 1088 | EC575_19215  | Gammaproteobacteria   | Vibrio cholerae                             | hypothetical protein EC575_19215 [Vibrio cholerae].                              | GCA_003712005.1 |
| ROZ42670.1 | HTH+PNPase+TPR+GreAB-C+PIN*→                              | HTH+PNPase+TPR+GreAB-C+PIN   | 1571 | EEB13_29810  | Actinobacteria        | Rhodococcus sp. WS3                         | hypothetical protein EEB13_29810 [Rhodococcus sp. WS3].                          | GCA_003797085.1 |
| RPV62916.1 | TPR+GreAB-C+PIN*→                                         | TPR+GreAB-C+PIN              | 808  | IPC830_03545 | Gammaproteobacteria   | Pseudomonas aeruginosa                      | hypothetical protein IPC830_03545 [Pseudomonas aeruginosa].                      | GCA_003836445.1 |
| RPX47920.1 | DOC+HTH→ REase+TOPC→?→ HetE-N1→ HetE-N1+TPR+GreAB-C+PIN*→ | HetE-N1+TPR+GreAB-C+PIN      | 1126 | IPC713_13275 | Gammaproteobacteria   | Pseudomonas aeruginosa                      | hypothetical protein IPC713_13275 [Pseudomonas aeruginosa].                      | GCA_003836815.1 |
| RQR65213.1 | REase+TPR+GreAB-C+PIN*→                                   | REase+TPR+GreAB-C+PIN        | 1346 | DIE12_31765  | Betaproteobacteria    | Burkholderia sp. Bp9015                     | tetratricopeptide repeat protein [Burkholderia sp. Bp9015].                      | GCA_003853505.1 |
| RQY09920.1 | REase+TPR+GreAB-C+PIN*→                                   | REase+TPR+GreAB-C+PIN        | 1135 | DF117_34925  | Betaproteobacteria    | Burkholderia stagnalis                      | tetratricopeptide repeat protein [Burkholderia stagnalis].                       | GCA_003857615.1 |
| RSM21562.1 | TPR+GreAB-C+PIN*→                                         | TPR+GreAB-C+PIN              | 851  | C5B76_20720  | Gammaproteobacteria   | Aeromonas salmonicida                       | hypothetical protein C5B76_20720 [Aeromonas salmonicida].                        | GCA_003947355.1 |
| RSM25744.1 | MNS-Npun2340+TPR+GreAB-C+PIN*→                            | MNS-Npun2340+TPR+GreAB-C+PIN | 851  | C5B77_18585  | Gammaproteobacteria   | Aeromonas salmonicida                       | hypothetical protein C5B77_18585 [Aeromonas salmonicida].                        | GCA_003947375.1 |
| RWE64146.1 | REase+TPR+GreAB-C+PIN*→                                   | REase+TPR+GreAB-C+PIN        | 1329 | EOS62_30690  | Alphaproteobacteria   | Mesorhizobium sp.                           | MAG: hypothetical protein EOS62_30690 [Mesorhizobium sp.].                       | GCA_004018195.1 |
| RWI50090.1 | REase+TPR+GreAB-C+PIN*→                                   | REase+TPR+GreAB-C+PIN        | 1328 | EOR16_31040  | Alphaproteobacteria   | Mesorhizobium sp.                           | MAG: hypothetical protein EOR16_31040 [Mesorhizobium sp.].                       | GCA_004019035.1 |
| RWN29279.1 | REase+TPR+TPR+GreAB-C+PIN*→                               | REase+TPR+TPR+GreAB-C+PIN    | 1333 | EOR95_21980  | Alphaproteobacteria   | Mesorhizobium sp.                           | MAG: hypothetical protein EOR95_21980 [Mesorhizobium sp.].                       | GCA_004020785.1 |
| RWN66659.1 | REase+TPR+TPR+GreAB-C+PIN*→                               | REase+TPR+TPR+GreAB-C+PIN    | 1333 | EOR99_16025  | Alphaproteobacteria   | Mesorhizobium sp.                           | MAG: hypothetical protein EOR99_16025 [Mesorhizobium sp.].                       | GCA_004020565.1 |
| RWQ61473.1 | REase+TPR+TPR+GreAB-C+PIN*→                               | REase+TPR+TPR+GreAB-C+PIN    | 1333 | EOS86_33015  | Alphaproteobacteria   | Mesorhizobium sp.                           | MAG: hypothetical protein EOS86_33015 [Mesorhizobium sp.].                       | GCA_004021745.1 |
| RWQ70448.1 | REase+TPR+TPR+GreAB-C+PIN*→                               | REase+TPR+TPR+GreAB-C+PIN    | 1002 | EOS85_27065  | Alphaproteobacteria   | Mesorhizobium sp.                           | MAG: hypothetical protein EOS85_27065 [Mesorhizobium sp.].                       | GCA_004021925.1 |
| RWU17258.1 | REase+TPR+GreAB-C+PIN*→                                   | REase+TPR+GreAB-C+PIN        | 1447 | DM813_28290  | Gammaproteobacteria   | Pseudomonas alkylphenolica                  | hypothetical protein DM813_28290 [Pseudomonas alkylphenolica].                   | GCA_004025535.1 |
| RXH58244.1 | REase+TPR+GreAB-C+PIN*→                                   | REase+TPR+GreAB-C+PIN        | 1185 | GRAN_1554    | Acidobacteria         | Granulicella sibirica                       | hypothetical protein GRAN_1554 [Granulicella sibirica].                          | GCA_004115155.1 |
| RXX05389.1 | REase+TPR+GreAB-C+PIN*→                                   | REase+TPR+GreAB-C+PIN        | 1249 | CRU97_08585  | Epsilonproteobacteria | Halarcobacter bivalviorum                   | hypothetical protein CRU97_08585 [Halarcobacter bivalviorum].                    | GCA_004116705.1 |

| acc        | operon                                                 | architecture          | len  | gen.name           | taxend                | species                       | define                                                                        | gca             |
|------------|--------------------------------------------------------|-----------------------|------|--------------------|-----------------------|-------------------------------|-------------------------------------------------------------------------------|-----------------|
| RXO70745.1 | HetE-N1→?→ TPR+GreAB-C+PIN*→                           | TPR+GreAB-C+PIN       | 686  | D0516_07920        | Gammaproteobacteria   | Salmonella enterica           | hypothetical protein D0516_07920 [Salmonella enterica].                       | GCA_004120835.1 |
| RYE55646.1 | PIN*→                                                  | PIN                   | 344  | EOP48_09765        | Bacteroidetes         | Sphingobacteriales bacterium  | MAG: hypothetical protein EOP48_09765 [Sphingobacteriales bacterium].         | GCA_004144425.1 |
| RYG99407.1 | REase+TPR+GreAB-C+PIN*→                                | REase+TPR+GreAB-C+PIN | 1330 | EON58_04040        | Alphaproteobacteria   | Alphaproteobacteria bacterium | MAG: hypothetical protein EON58_04040 [Alphaproteobacteria bacterium].        | GCA_004145575.1 |
| RYX84272.1 | TPR+GreAB-C+PIN*→                                      | TPR+GreAB-C+PIN       | 1192 | EON83_11290        | unclassified Bacteria | bacterium                     | MAG: hypothetical protein EON83_11290 [bacterium].                            | GCA_004172935.1 |
| RYY90115.1 | REase+TPR+GreAB-C+PIN*→                                | REase+TPR+GreAB-C+PIN | 1333 | EOO15_03925        | Bacteroidetes         | Chitinophagaceae bacterium    | MAG: hypothetical protein EOO15_03925 [Chitinophagaceae bacterium].           | GCA_004173495.1 |
| RZJ58585.1 | TPR+PIN*→                                              | TPR+PIN               | 1309 | EOO55_00010        | Bacteroidetes         | Hymenobacter sp.              | MAG: hypothetical protein EOO55_00010 [Hymenobacter sp.].                     | GCA_004211105.1 |
| RZJ92304.1 | TPR+GreAB-C+PIN*→                                      | TPR+GreAB-C+PIN       | 1267 | EOO20_02310        | Bacteroidetes         | Chryseobacterium sp.          | MAG: hypothetical protein EOO20_02310 [Chryseobacterium sp.].                 | GCA_004210875.1 |
| RZJ92386.1 | REase+nSTAND3→ TPR+GreAB-C+PIN*→                       | TPR+GreAB-C+PIN       | 1237 | EOO20_01975        | Bacteroidetes         | Chryseobacterium sp.          | MAG: tetratricopeptide repeat protein [Chryseobacterium sp.].                 | GCA_004210875.1 |
| RZL63110.1 | PIN*→                                                  | PIN                   | 307  | EOO93_08085        | Bacteroidetes         | Pedobacter sp.                | MAG: hypothetical protein EOO93_08085 [Pedobacter sp.].                       | GCA_004295955.1 |
| RZL84003.1 | REase+TPR+GreAB-C+PIN*→                                | REase+TPR+GreAB-C+PIN | 1323 | EOP66_03300        | Alphaproteobacteria   | Sphingomonas sp.              | MAG: tetratricopeptide repeat protein [Sphingomonas sp.].                     | GCA_004296035.1 |
| SCB54124.1 | REase+TPR+GreAB-C+PIN*→                                | REase+TPR+GreAB-C+PIN | 1171 | GA0061098_102379   | Alphaproteobacteria   | Bradyrhizobium shewense       | Transcription elongation factor, GreA/GreB family [Bradyrhizobium shewense].  | GCA_900094605.1 |
| SCE01180.1 | TPR+PIN*→   <-NUDIX                                    | TPR+PIN               | 1134 | GA0115241_108994   | Actinobacteria        | Streptomyces sp. DpondAA-D4   | hypothetical protein GA0115241_108994 [Streptomyces sp. DpondAA-D4].          | GCA_900091745.1 |
| SCF05211.1 | REase+TPR+GreAB-C+PIN*→                                | REase+TPR+GreAB-C+PIN | 1358 | GA0070215_1072     | Actinobacteria        | Micromonospora marina         | hypothetical protein GA0070215_1072 [Micromonospora marina].                  | GCA_900091565.1 |
| SCF05420.1 | SAD+HNNH→ X+PIN*→                                      | X+PIN                 | 1233 | GA0070562_5649     | Actinobacteria        | Micromonospora tulbaghiaae    | hypothetical protein GA0070562_5649 [Micromonospora tulbaghiaae].             | GCA_900091605.1 |
| SCL17674.1 | REase+TPR+GreAB-C+PIN*→                                | REase+TPR+GreAB-C+PIN | 1264 | GA0074694_2093     | Actinobacteria        | Micromonospora inyonensis     | Tfp pilus assembly protein PilF [Micromonospora inyonensis].                  | GCA_900091415.1 |
| SCQ18794.1 | CHC2+Toprim-DNAG→?→?→?→ HTH→ SIG+TM→ TPR+GreAB-C+PIN*→ | TPR+GreAB-C+PIN       | 1126 | TFUB4_00594        | Bacteroidetes         | Tannerella forsythia          | hypothetical protein TFUB4_00594 [Tannerella forsythia].                      | GCA_900096725.1 |
| SCQ19220.1 | CHC2+Toprim-DNAG→?→?→?→ HTH→ SIG+TM→ TPR+GreAB-C+PIN*→ | TPR+GreAB-C+PIN       | 1126 | TFUB20_00631       | Bacteroidetes         | Tannerella forsythia          | hypothetical protein TFUB20_00631 [Tannerella forsythia].                     | GCA_900096735.1 |
| SEP47521.1 | TPR+GreAB-C+PIN*→                                      | TPR+GreAB-C+PIN       | 975  | SAMN02787149_1275  | Gammaproteobacteria   | Pseudomonas sp. Snoq117.2     | hypothetical protein SAMN02787149_1275 [Pseudomonas sp. Snoq117.2].           | GCA_900110545.1 |
| SFD04359.1 | <-KAP_NTPase  TPR+PIN*→                                | TPR+PIN               | 1216 | SAMN04487968_1267  | Actinobacteria        | Nocardioides terrae           | hypothetical protein SAMN04487968_1267 [Nocardioides terrae].                 | GCA_900112345.1 |
| SFF03357.1 | <-Cas_Cas1<-?  ?→?→?→?→ REase+TPR+GreAB-C+PIN*→        | REase+TPR+GreAB-C+PIN | 1349 | SAMN05428977_10446 | Betaproteobacteria    | Nitrosomonas sp. Nm166        | hypothetical protein SAMN05428977_10446 [Nitrosomonas sp. Nm166].             | GCA_900112825.1 |
| SHH05937.1 | REase+TPR+GreAB-C+PIN*→                                | REase+TPR+GreAB-C+PIN | 1445 | SAMN05428948_2561  | Betaproteobacteria    | Massilia sp. CF038            | hypothetical protein SAMN05428948_2561 [Massilia sp. CF038].                  | GCA_900129765.1 |
| SHN30683.1 | PAIREDC-HTH→ REase+TPR+GreAB-C+PIN*→                   | REase+TPR+GreAB-C+PIN | 1588 | SAMN02787076_04976 | Betaproteobacteria    | Rhizobacter sp. OV335         | hypothetical protein SAMN02787076_04976 [Rhizobacter sp. OV335].              | GCA_900142965.1 |
| SIO63359.1 | REase+TPR+GreAB-C+PIN*→                                | REase+TPR+GreAB-C+PIN | 1291 | SAMN05444166_7323  | Planctomycetes        | Singulisphaera sp. GP187      | Transcription elongation factor, GreA/GreB family [Singulisphaera sp. GP187]. | GCA_900129635.1 |
| SOZ22209.1 | REase+TPR+GreAB-C+PIN→?→?→ PIN*→                       | PIN                   | 271  | CBM2604_U10003     | Betaproteobacteria    | Cupriavidus taiwanensis       | hypothetical protein CBM2604_U10003 [Cupriavidus taiwanensis].                | GCA_900249855.1 |
| SPT59210.1 | TPR+GreAB-C+PIN*→                                      | TPR+GreAB-C+PIN       | 1218 | NCTC11373_05764    | Actinobacteria        | Actinomadura madurae          | Flp pilus assembly protein TadD, contains TPR repeats [Actinomadura madurae]. | GCA_900445005.1 |
| SPY99988.1 | TPR+GreAB-C+PIN*→                                      | TPR+GreAB-C+PIN       | 1146 | NCTC11842_00133    | Gammaproteobacteria   | Pseudomonas luteola           | Uncharacterised protein [Pseudomonas luteola].                                | GCA_900455515.1 |

| acc        | operon                                          | architecture          | len  | gen.name        | taxend                | species                                                    | define                                                                                             | gca             |
|------------|-------------------------------------------------|-----------------------|------|-----------------|-----------------------|------------------------------------------------------------|----------------------------------------------------------------------------------------------------|-----------------|
| SQK85244.1 | DOC+HTH→ REase+TOPC→ HetE-N1→ TPR+GreAB-C+PIN*→ | TPR+GreAB-C+PIN       | 1088 | NCTC9433_00599  | Gammaproteobacteria   | <i>Pseudomonas aeruginosa</i>                              | Uncharacterised protein [ <i>Pseudomonas aeruginosa</i> ].                                         | GCA_900478745.1 |
| SSC09307.1 | TPR+GreAB-C+PIN*→                               | TPR+GreAB-C+PIN       | 1137 | BTURTLESOX_2492 | unclassified Bacteria | bacterium endosymbiont of <i>Bathymodiolus</i> sp. 5 South | hypothetical protein BTURTLESOX_2492 [bacterium endosymbiont of <i>Bathymodiolus</i> sp. 5 South]. | GCA_900127295.1 |
| STJ38438.1 | HetE-N1→ TPR+GreAB-C+PIN*→                      | TPR+GreAB-C+PIN       | 1093 | NCTC9110_01467  | Gammaproteobacteria   | <i>Escherichia coli</i>                                    | Uncharacterised protein [ <i>Escherichia coli</i> ].                                               | GCA_900449425.1 |
| STR27356.1 | REase+TPR+GreAB-C+PIN*→                         | REase+TPR+GreAB-C+PIN | 1303 | NCTC8661_05000  | Betaproteobacteria    | <i>Janthinobacterium lividum</i>                           | Putative Zn-dependent protease, contains TPR repeats [Janthinobacterium lividum].                  | GCA_900451225.1 |
| SUJ03282.1 | PIN*→                                           | PIN                   | 223  | NCTC4822_01389  | Firmicutes            | <i>Sporosarcina pasteurii</i>                              | Uncharacterised protein [ <i>Sporosarcina pasteurii</i> ].                                         | GCA_900457495.1 |
| TAA79883.1 | HetE-N1→ TPR+GreAB-C+PIN*→                      | TPR+GreAB-C+PIN       | 1069 | PMCND_08490     | Gammaproteobacteria   | <i>Pasteurella multocida</i>                               | hypothetical protein PMCND_08490 [ <i>Pasteurella multocida</i> ].                                 | GCA_004286935.1 |
| TAJ47852.1 | TPR+PIN*→                                       | TPR+PIN               | 1186 | EPO52_06520     | Actinobacteria        | <i>Herbiconiux</i> sp.                                     | MAG: hypothetical protein EPO52_06520 [ <i>Herbiconiux</i> sp.].                                   | GCA_004297105.1 |
| TAM51231.1 | REase+TPR+GreAB-C+PIN*→                         | REase+TPR+GreAB-C+PIN | 1301 | EPN57_18445     | Betaproteobacteria    | <i>Paraburkholderia</i> sp.                                | MAG: hypothetical protein EPN57_18445 [ <i>Paraburkholderia</i> sp.].                              | GCA_004322045.1 |
| TAM55201.1 | REase+TPR+GreAB-C+PIN*→   <-?  AbiJ-NTD3+REase→ | REase+TPR+GreAB-C+PIN | 1335 | EPN57_04160     | Betaproteobacteria    | <i>Paraburkholderia</i> sp.                                | MAG: hypothetical protein EPN57_04160 [ <i>Paraburkholderia</i> sp.].                              | GCA_004322045.1 |
| TCU73661.1 | TPR+GreAB-C+PIN*→                               | TPR+GreAB-C+PIN       | 1313 | EDE10_104327    | Alphaproteobacteria   | <i>Bradyrhizobium</i> sp. Y-H1                             | tetratricopeptide repeat protein [ <i>Bradyrhizobium</i> sp. Y-H1].                                | GCA_004346395.1 |
| TDM08142.1 | REase+TPR+GreAB-C+PIN*→                         | REase+TPR+GreAB-C+PIN | 1202 | C4K60_01155     | Betaproteobacteria    | <i>Ideonella</i> sp. MAG2                                  | MAG: hypothetical protein C4K60_01155 [ <i>Ideonella</i> sp. MAG2].                                | GCA_004359425.1 |
| TDZ78257.1 | TPR+PIN*→                                       | TPR+PIN               | 1185 | DE4585_04094    | Actinobacteria        | <i>Mycobacteroides salmoniphilum</i>                       | hypothetical protein DE4585_04094 [ <i>Mycobacteroides salmoniphilum</i> ].                        | GCA_004366855.1 |
| TIN45883.1 | TPR+GreAB-C+PIN*→ TPR→                          | TPR+GreAB-C+PIN       | 539  | E5Y32_12205     | Alphaproteobacteria   | <i>Mesorhizobium</i> sp.                                   | MAG: GreA/GreB family elongation factor [ <i>Mesorhizobium</i> sp.].                               | GCA_004961865.1 |
| TIT34473.1 | TPR+GreAB-C+PIN*→                               | TPR+GreAB-C+PIN       | 502  | E5W78_10605     | Alphaproteobacteria   | <i>Mesorhizobium</i> sp.                                   | MAG: hypothetical protein E5W78_10605, partial [ <i>Mesorhizobium</i> sp.].                        | GCA_004965505.1 |
| TIX43905.1 | TPR+GreAB-C+PIN*→                               | TPR+GreAB-C+PIN       | 708  | E5V40_01360     | Alphaproteobacteria   | <i>Mesorhizobium</i> sp.                                   | MAG: GreA/GreB family elongation factor [ <i>Mesorhizobium</i> sp.].                               | GCA_004964855.1 |
| TLM83646.1 | TPR+PIN*→                                       | TPR+PIN               | 1179 | FDW83_09305     | Actinobacteria        | <i>Pseudarthrobacter</i> sp. NamE2                         | tetratricopeptide repeat protein [ <i>Pseudarthrobacter</i> sp. NamE2].                            | GCA_005796205.1 |
| TMA89552.1 | REase+TPR+GreAB-C+PIN*→                         | REase+TPR+GreAB-C+PIN | 1299 | E6J74_25025     | Deltaproteobacteria   | <i>Deltaproteobacteria</i> bacterium                       | MAG: hypothetical protein E6J74_25025 [ <i>Deltaproteobacteria</i> bacterium].                     | GCA_005879255.1 |
| TMJ19619.1 | REase+TPR+GreAB-C+PIN*→                         | REase+TPR+GreAB-C+PIN | 1331 | E6G92_07565     | Alphaproteobacteria   | <i>Alphaproteobacteria</i> bacterium                       | MAG: hypothetical protein E6G92_07565 [ <i>Alphaproteobacteria</i> bacterium].                     | GCA_005883305.1 |
| TOF36973.1 | TPR+GreAB-C+PIN*→                               | TPR+GreAB-C+PIN       | 785  | CGJ28_20670     | Gammaproteobacteria   | <i>Vibrio parahaemolyticus</i>                             | hypothetical protein CGJ28_20670 [ <i>Vibrio parahaemolyticus</i> ].                               | GCA_006371865.1 |
| TOH27190.1 | GreAB-C*→                                       | GreAB-C               | 599  | CGI84_22675     | Gammaproteobacteria   | <i>Vibrio parahaemolyticus</i>                             | hypothetical protein CGI84_22675, partial [ <i>Vibrio parahaemolyticus</i> ].                      | GCA_006372765.1 |
| TQE99579.1 | REase+SNF2→ REase+TPR+GreAB-C+PIN*→             | REase+TPR+GreAB-C+PIN | 1230 | FKY71_07895     | Gammaproteobacteria   | <i>Spiribacter salinus</i>                                 | MAG: hypothetical protein FKY71_07895 [ <i>Spiribacter salinus</i> ].                              | GCA_006569195.1 |
| TQS42859.1 | REase+TPR+GreAB-C+PIN*→                         | REase+TPR+GreAB-C+PIN | 1252 | FL583_22685     | Actinobacteria        | <i>Cryptosporangium phraense</i>                           | DUF4365 domain-containing protein [ <i>Cryptosporangium phraense</i> ].                            | GCA_006912135.1 |
| TSP11291.1 | REase+TPR+GreAB-C+PIN*→                         | REase+TPR+GreAB-C+PIN | 1314 | FGG12_18885     | Betaproteobacteria    | <i>Cupriavidus campinensis</i>                             | DUF4365 domain-containing protein [ <i>Cupriavidus campinensis</i> ].                              | GCA_007572485.1 |
| TVP63446.1 | EAD10+SWACOS→?→ EAD10+TPR+GreAB-C+PIN*→         | EAD10+TPR+GreAB-C+PIN | 1213 | EA343_08005     | Cyanobacteria         | <i>Nodularia</i> sp. (in: Bacteria)                        | MAG: hypothetical protein EA343_08005 [ <i>Nodularia</i> sp. (in: Bacteria)].                      | GCA_007692755.1 |
| TWD39045.1 | HetE-N1→ TPR+GreAB-C+PIN*→                      | TPR+GreAB-C+PIN       | 1117 | FBY13_107200    | Gammaproteobacteria   | <i>Pantoea</i> sp. SJZ147                                  | hypothetical protein FBY13_107200 [ <i>Pantoea</i> sp. SJZ147].                                    | GCA_007828605.1 |
| TWI95027.1 | TPR+GreAB-C+PIN→ PIN*→                          | PIN                   | 240  | JN11_04456      | Bacteroidetes         | <i>Mucilaginibacter frigoritolerans</i>                    | hypothetical protein JN11_04456 [ <i>Mucilaginibacter frigoritolerans</i> ].                       | GCA_007830615.1 |

| acc            | operon                         | architecture              | len  | gen.name           | taxend                | species                                  | define                                                                                                                          | gca             |
|----------------|--------------------------------|---------------------------|------|--------------------|-----------------------|------------------------------------------|---------------------------------------------------------------------------------------------------------------------------------|-----------------|
| TXH46669.1     | REase+TPR+GreAB-C+PIN*→        | REase+TPR+GreAB-C+PIN     | 1345 | E6Q92_01630        | Betaproteobacteria    | Burkholderiaceae bacterium               | MAG: tetratricopeptide repeat protein [Burkholderiaceae bacterium].                                                             | GCA_008012415.1 |
| TXJ01161.1     | X+PIN*→                        | X+PIN                     | 1259 | E6Q32_04910        | Betaproteobacteria    | Neisseriales bacterium                   | MAG: hypothetical protein E6Q32_04910 [Neisseriales bacterium].                                                                 | GCA_008017145.1 |
| VBE91451.1     | REase+TPR+GreAB-C+PIN*→        | REase+TPR+GreAB-C+PIN     | 1327 | SAMEA2066717_00371 | Betaproteobacteria    | Burkholderia pseudomallei                | Uncharacterised protein [Burkholderia pseudomallei].                                                                            | GCA_900591745.1 |
| VBP17170.1     | REase+TPR+GreAB-C+PIN*→        | REase+TPR+GreAB-C+PIN     | 1327 | SAMEA2065229_01356 | Betaproteobacteria    | Burkholderia pseudomallei                | Uncharacterised protein [Burkholderia pseudomallei].                                                                            | GCA_900593515.1 |
| VBP73370.1     | REase+TPR+GreAB-C+PIN*→        | REase+TPR+GreAB-C+PIN     | 1327 | SAMEA2068240_03247 | Betaproteobacteria    | Burkholderia pseudomallei                | Uncharacterised protein [Burkholderia pseudomallei].                                                                            | GCA_900593615.1 |
| VEA49048.1     | HetE-N1→ TPR+GreAB-C+PIN*→     | TPR+GreAB-C+PIN           | 1107 | NCTC7306_04489     | Gammaproteobacteria   | Salmonella enterica subsp. arizonae      | Uncharacterised protein [Salmonella enterica subsp. arizonae].                                                                  | GCA_900635595.1 |
| VTU02511.1     | REase+TPR+GreAB-C+PIN*→        | REase+TPR+GreAB-C+PIN     | 2231 | GCJUQL4_63830      | Planctomycetes        | Gemmataceae bacterium                    | atpase aaa : Uncharacterized protein OS=delta proteobacterium MLMS-1 GN=MldDRAFT_0410 PE=4 SV=1: TPR_9 [Gemmataceae bacterium]. | GCA_901538445.1 |
| VUO82246.1     | REase+TPR+GreAB-C+PIN*→        | REase+TPR+GreAB-C+PIN     | 1284 | MFJNGALL_01363     | Gammaproteobacteria   | Stenotrophomonas maltophilia             | hypothetical protein MFJNGALL_01363 [Stenotrophomonas maltophilia].                                                             | GCA_902157665.1 |
| VUP91206.1     | REase+TPR→ TPR+PIN*→           | TPR+PIN                   | 777  | MKCKLKB_00143      | Gammaproteobacteria   | Stenotrophomonas maltophilia             | hypothetical protein MKCKLKB_00143 [Stenotrophomonas maltophilia].                                                              | GCA_902158105.1 |
| VVH66851.1     | TPR+GreAB-C+PIN*→              | TPR+GreAB-C+PIN           | 1163 | BSPLISOX_572       | environmental samples | uncultured Gammaproteobacteria bacterium | hypothetical protein BSPLISOX_572 [uncultured Gammaproteobacteria bacterium].                                                   | GCA_902497535.1 |
| VVM25671.1     | TPR→ TPR+GreAB-C+PIN*→         | TPR+GreAB-C+PIN           | 622  | BSPWISOXPB_7707    | environmental samples | uncultured Gammaproteobacteria bacterium | hypothetical protein BSPWISOXPB_7707 [uncultured Gammaproteobacteria bacterium].                                                | GCA_902497575.1 |
| WP_000012642.1 | TPR+PIN*→                      | TPR+PIN                   | 1218 | -                  | Firmicutes            | Bacillus cereus                          | hypothetical protein [Bacillus cereus].                                                                                         | GCF_000291235.1 |
| WP_000989353.1 | HetE-N1→ TPR+GreAB-C+PIN*→     | TPR+GreAB-C+PIN           | 1094 | -                  | Gammaproteobacteria   | Escherichia                              | MULTISPECIES: hypothetical protein [Escherichia].                                                                               | GCF_000503375.1 |
| WP_002163366.1 | TPR+PIN*→                      | TPR+PIN                   | 1214 | -                  | Firmicutes            | Bacillus paranthracis                    | hypothetical protein [Bacillus paranthracis].                                                                                   | GCF_900176925.1 |
| WP_002203277.1 | TPR+PIN*→                      | TPR+PIN                   | 1158 | -                  | Firmicutes            | Bacillus cereus                          | hypothetical protein [Bacillus cereus].                                                                                         | GCF_000293545.1 |
| WP_002981151.1 | TPR+GreAB-C+PIN*→              | TPR+GreAB-C+PIN           | 1137 | -                  | Bacteroidetes         | Chryseobacterium                         | MULTISPECIES: hypothetical protein [Chryseobacterium].                                                                          | GCF_003815675.1 |
| WP_003193440.1 | TPR+PIN*→                      | TPR+PIN                   | 1179 | -                  | Firmicutes            | Bacillus mycoides                        | hypothetical protein [Bacillus mycoides].                                                                                       | GCF_000003925.1 |
| WP_003320554.1 | TPR+GreAB-C+PIN*→              | TPR+GreAB-C+PIN           | 1148 | -                  | Firmicutes            | Alkalihalobacillus alcalophilus          | hypothetical protein [Alkalihalobacillus alcalophilus].                                                                         | GCF_000292245.2 |
| WP_003365555.1 | TPR+GreAB-C+PIN*→              | TPR+GreAB-C+PIN           | 1052 | -                  | Firmicutes            | Clostridium botulinum                    | hypothetical protein [Clostridium botulinum].                                                                                   | GCF_000171095.1 |
| WP_004107781.1 | REase+TPR+TPR+GreAB-C+PIN*→    | REase+TPR+TPR+GreAB-C+PIN | 1363 | -                  | Alphaproteobacteria   | Rhizobium freirei                        | restriction endonuclease [Rhizobium freirei].                                                                                   | GCF_000359745.1 |
| WP_004552328.1 | REase+TPR+GreAB-C+PIN*→        | REase+TPR+GreAB-C+PIN     | 1345 | -                  | Betaproteobacteria    | Burkholderia pseudomallei                | hypothetical protein [Burkholderia pseudomallei].                                                                               | GCF_000259815.1 |
| WP_005336021.1 | X+PIN*→ HTH→?→?→ HTH→          | X+PIN                     | 1180 | -                  | Firmicutes            | Dorea formicigenerans                    | hypothetical protein [Dorea formicigenerans].                                                                                   | GCF_000169235.1 |
| WP_005619555.1 | REase+TPR+GreAB-C+PIN*→        | REase+TPR+GreAB-C+PIN     | 1313 | -                  | Alphaproteobacteria   | Epibacterium mobile                      | tetratricopeptide repeat protein [Epibacterium mobile].                                                                         | GCF_000376545.2 |
| WP_005875010.1 | HTH→ SIG+TM→ TPR+GreAB-C+PIN*→ | TPR+GreAB-C+PIN           | 1125 | -                  | Bacteroidetes         | Porphyromonas gingivalis                 | hypothetical protein [Porphyromonas gingivalis].                                                                                | GCF_000007585.1 |
| WP_007114289.1 | TPR+GreAB-C+PIN*→              | TPR+GreAB-C+PIN           | 1116 | -                  | Gammaproteobacteria   | Halomonas boliviensis                    | hypothetical protein [Halomonas boliviensis].                                                                                   | GCF_000236035.1 |
| WP_007575774.1 | REase+TPR+GreAB-C+PIN*→        | REase+TPR+GreAB-C+PIN     | 1298 | -                  | Actinobacteria        | Patulibacter medicamentivorans           | hypothetical protein [Patulibacter medicamentivorans].                                                                          | GCF_000240225.1 |
| WP_008074062.1 | HetE-N1→ TPR+GreAB-C+PIN*→     | TPR+GreAB-C+PIN           | 1116 | -                  | Gammaproteobacteria   | Vibrio sinaloensis                       | hypothetical protein [Vibrio sinaloensis].                                                                                      | GCF_000189275.1 |
| WP_008371053.1 | TPR+GreAB-C+PIN*→              | TPR+GreAB-C+PIN           | 916  | -                  | Gammaproteobacteria   | Pseudomonas sp. M47T1                    | hypothetical protein [Pseudomonas sp. M47T1].                                                                                   | GCF_000263855.1 |
| WP_008676251.1 | REase+TPR+GreAB-C+PIN*→        | REase+TPR+GreAB-C+PIN     | 1224 | -                  | Planctomycetes        | Rhodopirellula sallentina                | phosphorylase family 1 protein [Rhodopirellula sallentina].                                                                     | GCF_000346505.1 |
| WP_008891423.1 | REase+TPR+GreAB-C+PIN*→        | REase+TPR+GreAB-C+PIN     | 1287 | -                  | Alphaproteobacteria   | Thalassospira profundimaris              | tetratricopeptide repeat protein [Thalassospira profundimaris].                                                                 | GCF_000300275.1 |
| WP_009135826.1 | X+PIN*→                        | X+PIN                     | 1248 | -                  | Bacteroidetes         | Odoribacter laneus                       | hypothetical protein [Odoribacter laneus].                                                                                      | GCF_902374615.1 |
| WP_009204273.1 | X+PIN*→                        | X+PIN                     | 1224 | -                  | Firmicutes            | Anaerostipes hadrus                      | hypothetical protein [Anaerostipes hadrus].                                                                                     | GCF_000332875.2 |

| acc            | operon                                        | architecture                 | len  | gen.name | taxend              | species                            | define                                                                   | gca             |
|----------------|-----------------------------------------------|------------------------------|------|----------|---------------------|------------------------------------|--------------------------------------------------------------------------|-----------------|
| WP_009805247.1 | REase+TPR+GreAB-C+PIN*→                       | REase+TPR+GreAB-C+PIN        | 1334 | -        | Alphaproteobacteria | Pseudoocceanicola batsensis        | restriction endonuclease [Pseudoocceanicola batsensis].                  | GCF_000152725.1 |
| WP_009857784.1 | REase+TPR+GreAB-C+PIN*→                       | REase+TPR+GreAB-C+PIN        | 1374 | -        | Betaproteobacteria  | Rubrivivax benzoatilyticus         | restriction endonuclease [Rubrivivax benzoatilyticus].                   | GCF_000190375.1 |
| WP_009899558.1 | TPR+GreAB-C+PIN*→                             | TPR+GreAB-C+PIN              | 1069 | -        | Firmicutes          | Clostridioides difficile           | hypothetical protein [Clostridioides difficile].                         | GCF_000211235.1 |
| WP_010516915.1 | REase+TPR+GreAB-C+PIN*→                       | REase+TPR+GreAB-C+PIN        | 1323 | -        | Alphaproteobacteria | Komagataeibacter oboediens         | tetratricopeptide repeat protein [Komagataeibacter oboediens].           | GCF_000227565.1 |
| WP_010555470.1 | HetE-N1→ TPR+GreAB-C+PIN*→                    | TPR+GreAB-C+PIN              | 1100 | -        | Gammaproteobacteria | Pseudoalteromonas arctica          | hypothetical protein [Pseudoalteromonas arctica].                        | GCF_000238395.3 |
| WP_011204815.1 | REase+TPR+GreAB-C+PIN*→   <-HTH+HTH           | REase+TPR+GreAB-C+PIN        | 1344 | -        | Betaproteobacteria  | Burkholderia pseudomallei          | hypothetical protein [Burkholderia pseudomallei].                        | GCF_000350505.1 |
| WP_011691689.1 | TPR+PIN*→                                     | TPR+PIN                      | 1180 | -        | Actinobacteria      | Arthrobacter sp. FB24              | tetratricopeptide repeat protein [Arthrobacter sp. FB24].                | GCF_000196235.1 |
| WP_012187551.1 | TPR+PIN*→                                     | TPR+PIN                      | 1280 | -        | Gammaproteobacteria | Fluoribacter dumoffii              | hypothetical protein [Fluoribacter dumoffii].                            | -               |
| WP_012304478.1 | HetE-N1→ TPR+GreAB-C+PIN*→                    | TPR+GreAB-C+PIN              | 1090 | -        | Gammaproteobacteria | Yersinia pseudotuberculosis        | hypothetical protein [Yersinia pseudotuberculosis].                      | GCF_000019465.1 |
| WP_012365289.1 | REase+TPR+GreAB-C+PIN*→                       | REase+TPR+GreAB-C+PIN        | 1351 | -        | Betaproteobacteria  | Burkholderia ambifaria             | hypothetical protein [Burkholderia ambifaria].                           | GCF_000019925.1 |
| WP_012655030.1 | REase+TPR+GreAB-C+PIN*→                       | REase+TPR+GreAB-C+PIN        | 1290 | -        | Alphaproteobacteria | Agrobacterium vitis                | tetratricopeptide repeat protein [Agrobacterium vitis].                  | GCF_000016285.1 |
| WP_013320645.1 | <-TIR+CASPASE<-?<-?  PNPase+TPR+GreAB-C+PIN*→ | PNPase+TPR+GreAB-C+PIN       | 1389 | -        | Cyanobacteria       | Gloeothece verrucosa               | purine or other phosphorylase family 1 [Gloeothece verrucosa].           | GCF_000147335.1 |
| WP_013724217.1 | HetE-N1→ MNS-Npun2340+TPR+GreAB-C+PIN*→       | MNS-Npun2340+TPR+GreAB-C+PIN | 1094 | -        | Gammaproteobacteria | Aeromonas veronii                  | hypothetical protein [Aeromonas veronii].                                | GCF_000204115.1 |
| WP_013846680.1 | REase+TPR+GreAB-C+PIN*→                       | REase+TPR+GreAB-C+PIN        | 1311 | -        | Alphaproteobacteria | Sphingobium chlorophenicum         | hypothetical protein [Sphingobium chlorophenicum].                       | GCF_000147835.2 |
| WP_013921742.1 | Mbetalac→ Trypsin+TPR+GreAB-C+PIN*→           | Trypsin+TPR+GreAB-C+PIN      | 1363 | -        | Bacteroidetes       | Runella slithyformis               | trypsin-like peptidase domain-containing protein [Runella slithyformis]. | GCF_000218895.1 |
| WP_014399772.1 | TPR+GreAB-C+PIN*→                             | TPR+GreAB-C+PIN              | 1160 | -        | Deltaproteobacteria | Coralloccoccus coralloides         | GreA/GreB family elongation factor [Coralloccoccus coralloides].         | GCF_000255295.1 |
| WP_015949235.1 | REase+TPR+GreAB-C+PIN*→                       | REase+TPR+GreAB-C+PIN        | 1112 | -        | Deltaproteobacteria | Desulfatibacillum aliphaticivorans | hypothetical protein [Desulfatibacillum aliphaticivorans].               | GCF_000021905.1 |
| WP_016083038.1 | TPR+PIN*→                                     | TPR+PIN                      | 1154 | -        | Firmicutes          | Bacillus cereus                    | hypothetical protein [Bacillus cereus].                                  | GCF_000399005.1 |
| WP_016796932.1 | TPR+GreAB-C+PIN*→                             | TPR+GreAB-C+PIN              | 1236 | -        | Gammaproteobacteria | Vibrio cyclitrophicus              | hypothetical protein [Vibrio cyclitrophicus].                            | GCF_000256385.2 |
| WP_016981456.1 | REase+TPR+GreAB-C+PIN*→                       | REase+TPR+GreAB-C+PIN        | 1113 | -        | Gammaproteobacteria | Pseudomonas amygdali               | hypothetical protein [Pseudomonas amygdali].                             | GCF_000275945.1 |
| WP_017010147.1 | TPR+GreAB-C+PIN*→                             | TPR+GreAB-C+PIN              | 1114 | -        | Gammaproteobacteria | Enterovibrio norvegicus            | hypothetical protein [Enterovibrio norvegicus].                          | GCF_000286875.2 |
| WP_017056082.1 | HetE-N1→ TPR+GreAB-C+PIN*→                    | TPR+GreAB-C+PIN              | 1088 | -        | Gammaproteobacteria | Vibrio kanaloae                    | hypothetical protein [Vibrio kanaloae].                                  | GCF_000272165.2 |
| WP_017278805.1 | TPR+GreAB-C+PIN*→                             | TPR+GreAB-C+PIN              | 1158 | -        | Gammaproteobacteria | Pseudomonas syringae               | hypothetical protein [Pseudomonas syringae].                             | GCF_001913215.1 |
| WP_017307658.1 | EAD10→?→?→ EAD10+TPR+GreAB-C+PIN*→            | EAD10+TPR+GreAB-C+PIN        | 1214 | -        | Cyanobacteria       | Fischerella sp. PCC 9339           | hypothetical protein [Fischerella sp. PCC 9339].                         | GCF_000315585.1 |
| WP_017684618.1 | REase+TPR+GreAB-C+PIN*→                       | REase+TPR+GreAB-C+PIN        | 1438 | -        | Gammaproteobacteria | Pseudomonas syringae               | hypothetical protein [Pseudomonas syringae].                             | GCF_000233815.1 |
| WP_017867504.1 | X+PIN*→                                       | X+PIN                        | 1207 | -        | Firmicutes          | Ligilactobacillus pobuzihii        | DUF4365 domain-containing protein [Ligilactobacillus pobuzihii].         | GCF_001433815.1 |
| WP_018464656.1 | TPR+PIN*→                                     | TPR+PIN                      | 1200 | -        | Bacteroidetes       | Prevotella paludivivens            | hypothetical protein [Prevotella paludivivens].                          | GCF_000613605.1 |
| WP_019086277.1 | REase+TPR+GreAB-C+PIN*→                       | REase+TPR+GreAB-C+PIN        | 1323 | -        | Alphaproteobacteria | Komagataeibacter europaeus         | tetratricopeptide repeat protein [Komagataeibacter europaeus].           | GCF_000285295.1 |
| WP_019092358.1 | REase+TPR+GreAB-C+PIN*→                       | REase+TPR+GreAB-C+PIN        | 1323 | -        | Alphaproteobacteria | Acetobacteraceae                   | MULTISPECIES: tetratricopeptide repeat protein [Acetobacteraceae].       | GCF_003850965.1 |
| WP_019865944.1 | HetE-N1→ TPR+GreAB-C+PIN*→                    | TPR+GreAB-C+PIN              | 1111 | -        | Gammaproteobacteria | Methylovulum miyakonense           | hypothetical protein [Methylovulum miyakonense].                         | GCF_000384075.1 |
| WP_019949723.1 | TPR+GreAB-C+PIN*→                             | TPR+GreAB-C+PIN              | 909  | -        | Bacteroidetes       | Hymenobacter aerophilus            | hypothetical protein [Hymenobacter aerophilus].                          | GCF_000382225.1 |
| WP_020099407.1 | TPR+PIN*→                                     | TPR+PIN                      | 1185 | -        | Actinobacteria      | Mycobacterium sp. 360MFTsu5.1      | hypothetical protein [Mycobacterium sp. 360MFTsu5.1].                    | GCF_000383495.1 |
| WP_020795266.1 | HetE-N1→ TPR+GreAB-C+PIN*→                    | TPR+GreAB-C+PIN              | 1112 | -        | Gammaproteobacteria | Pseudomonas sp. G5(2012)           | hypothetical protein [Pseudomonas sp. G5(2012)].                         | GCF_000408945.1 |
| WP_021554497.1 | HetE-N1→ TPR+GreAB-C+PIN*→                    | TPR+GreAB-C+PIN              | 1093 | -        | Gammaproteobacteria | Enterobacteriaceae                 | MULTISPECIES: hypothetical protein [Enterobacteriaceae].                 | GCF_002110225.1 |
| WP_021876213.1 | PIN*→                                         | PIN                          | 1097 | -        | Firmicutes          | Clostridium chauvoei               | tetratricopeptide repeat protein [Clostridium chauvoei].                 | GCF_002327205.1 |

| acc            | operon                                                 | architecture               | len  | gen.name | taxend              | species                         | define                                                                  | gca             |
|----------------|--------------------------------------------------------|----------------------------|------|----------|---------------------|---------------------------------|-------------------------------------------------------------------------|-----------------|
| WP_022388983.1 | X+PIN*→                                                | X+PIN                      | 1200 | -        | Firmicutes          | Blautia obeum                   | hypothetical protein [Blautia obeum].                                   | GCF_013299585.1 |
| WP_022619607.1 | TPR+GreAB-C+PIN*→                                      | TPR+GreAB-C+PIN            | 1069 | -        | Firmicutes          | Clostridioides difficile        | hypothetical protein [Clostridioides difficile].                        | GCF_000530295.1 |
| WP_022674357.1 | REase→?→ REase+TPR+GreAB-C+PIN*→                       | REase+TPR+GreAB-C+PIN      | 1290 | -        | Alphaproteobacteria | Novosphingopyxis baekryungensis | hypothetical protein [Novosphingopyxis baekryungensis].                 | GCF_000420305.1 |
| WP_024552132.1 | HNH→?→?→ HetE-N1→ TPR+GreAB-C+PIN*→                    | TPR+GreAB-C+PIN            | 1092 | -        | Gammaproteobacteria | Franconibacter helveticus       | hypothetical protein [Franconibacter helveticus].                       | GCF_000485945.1 |
| WP_024678816.1 | REase+TPR+GreAB-C+PIN*→                                | REase+TPR+GreAB-C+PIN      | 1317 | -        | Gammaproteobacteria | Pseudomonas syringae            | DUF4365 domain-containing protein [Pseudomonas syringae].               | GCF_000452685.1 |
| WP_024698051.1 | REase+TPR+GreAB-C+PIN*→                                | REase+TPR+GreAB-C+PIN      | 1438 | -        | Gammaproteobacteria | Pseudomonas avellanae           | hypothetical protein [Pseudomonas avellanae].                           | GCF_000452845.1 |
| WP_024925158.1 | REase+TPR+TPR+GreAB-C+PIN*→                            | REase+TPR+TPR+GreAB-C+PIN  | 1315 | -        | Alphaproteobacteria | Mesorhizobium                   | MULTISPECIES: GreA/GreB family elongation factor [Mesorhizobium].       | GCF_000568635.1 |
| WP_025240246.1 | REase+TOPC→ HetE-N1→ HetE-N1+TPR+GreAB-C+PIN*→         | HetE-N1+TPR+GreAB-C+PIN    | 952  | -        | Gammaproteobacteria | Pseudomonas stutzeri            | hypothetical protein [Pseudomonas stutzeri].                            | GCF_000590475.1 |
| WP_026105277.1 | TPR+GreAB-C+PIN*→                                      | TPR+GreAB-C+PIN            | 611  | -        | Alphaproteobacteria | Methylobacterium sp. MB200      | hypothetical protein [Methylobacterium sp. MB200].                      | GCF_000333655.1 |
| WP_026508802.1 | HEPN+SNF→?→?→?→ X+PIN*→?→ CITB-HTH+LexA-protease→      | X+PIN                      | 1212 | -        | Firmicutes          | Butyrivibrio sp. MC2013         | hypothetical protein [Butyrivibrio sp. MC2013].                         | GCF_000424585.1 |
| WP_026811785.1 | TPR+PIN*→                                              | TPR+PIN                    | 1261 | -        | Bacteroidetes       | Arenibacter certesii            | hypothetical protein [Arenibacter certesii].                            | GCF_000429545.1 |
| WP_027471277.1 | TPR+GreAB-C+PIN*→                                      | TPR+GreAB-C+PIN            | 1073 | -        | Bacteroidetes       | Saccharicrinis fermentans       | hypothetical protein [Saccharicrinis fermentans].                       | GCF_000517085.1 |
| WP_028048816.1 | HTH+PNPase+TPR+GreAB-C+PIN*→                           | HTH+PNPase+TPR+GreAB-C+PIN | 1518 | -        | Actinobacteria      | Cellulomonas sp. URHD0024       | helix-turn-helix domain-containing protein [Cellulomonas sp. URHD0024]. | GCF_000426185.1 |
| WP_029071033.1 | X+PIN*→                                                | X+PIN                      | 1212 | -        | Firmicutes          | Kandleria vitulina              | hypothetical protein [Kandleria vitulina].                              | GCF_000622125.1 |
| WP_029379391.1 | REase+TPR+GreAB-C+PIN*→                                | REase+TPR+GreAB-C+PIN      | 1438 | -        | Gammaproteobacteria | Pseudomonas fuscovaginae        | hypothetical protein [Pseudomonas fuscovaginae].                        | GCF_000251185.1 |
| WP_031437352.1 | REase+TPR+GreAB-C+PIN*→                                | REase+TPR+GreAB-C+PIN      | 1323 | -        | Gammaproteobacteria | Methylobacter tundripaludum     | DUF4365 domain-containing protein [Methylobacter tundripaludum].        | GCF_000733835.1 |
| WP_031445473.1 | TPR+GreAB-C+PIN*→                                      | TPR+GreAB-C+PIN            | 1244 | -        | Bacteroidetes       | Arenibacter algicola            | hypothetical protein [Arenibacter algicola].                            | GCF_000733925.1 |
| WP_031548868.1 | REase→ X+PIN*→?→?→?→?→?→ MACRODOMAIN→                  | X+PIN                      | 1209 | -        | Firmicutes          | Oribacterium sp. FC2011         | hypothetical protein [Oribacterium sp. FC2011].                         | GCF_000701645.1 |
| WP_032661435.1 | TPR+GreAB-C+PIN*→                                      | TPR+GreAB-C+PIN            | 1139 | -        | Gammaproteobacteria | Pseudomonas syringae            | hypothetical protein [Pseudomonas syringae].                            | GCF_000800685.1 |
| WP_032902625.1 | REase+TPR+GreAB-C+PIN*→                                | REase+TPR+GreAB-C+PIN      | 1438 | -        | Gammaproteobacteria | Pseudomonas                     | MULTISPECIES: hypothetical protein [Pseudomonas].                       | GCF_000511155.2 |
| WP_033132679.1 | HetE-N1→ TPR+GreAB-C+PIN*→                             | TPR+GreAB-C+PIN            | 1074 | -        | Gammaproteobacteria | Acinetobacter sp. MN12          | hypothetical protein [Acinetobacter sp. MN12].                          | GCF_000764915.1 |
| WP_033469897.1 | REase+TPR+GreAB-C+PIN*→                                | REase+TPR+GreAB-C+PIN      | 1282 | -        | Betaproteobacteria  | Bordetella bronchiseptica       | hypothetical protein [Bordetella bronchiseptica].                       | GCF_000690175.1 |
| WP_033736921.1 | HetE-N1→?→ TPR+GreAB-C+PIN*→                           | TPR+GreAB-C+PIN            | 760  | -        | Gammaproteobacteria | Pantoea sp. Sc1                 | hypothetical protein [Pantoea sp. Sc1].                                 | GCF_000255315.1 |
| WP_034127539.1 | TPR+GreAB-C+PIN*→                                      | TPR+GreAB-C+PIN            | 1158 | -        | Gammaproteobacteria | Pseudomonas fluorescens         | hypothetical protein [Pseudomonas fluorescens].                         | GCF_000801795.1 |
| WP_034129364.1 | REase+TPR+GreAB-C+PIN*→                                | REase+TPR+GreAB-C+PIN      | 1244 | -        | Gammaproteobacteria | Acinetobacter baumannii         | hypothetical protein [Acinetobacter baumannii].                         | GCF_000802915.1 |
| WP_034392332.1 | REase+TPR+GreAB-C+PIN*→                                | REase+TPR+GreAB-C+PIN      | 1413 | -        | Betaproteobacteria  | Delftia acidovorans             | hypothetical protein [Delftia acidovorans].                             | GCF_001598795.1 |
| WP_034708052.1 | HetE-N1→?→?→ GreAB-C+PIN*→                             | GreAB-C+PIN                | 575  | -        | Gammaproteobacteria | Acinetobacter bereziniae        | hypothetical protein [Acinetobacter bereziniae].                        | GCF_000368505.1 |
| WP_035460854.1 | HetE-N1→ TPR+GreAB-C+PIN*→                             | TPR+GreAB-C+PIN            | 1104 | -        | Gammaproteobacteria | unclassified Alcanivorax        | MULTISPECIES: hypothetical protein [unclassified Alcanivorax].          | GCF_000524665.1 |
| WP_035530189.1 | REase+TPR+GreAB-C+PIN*→                                | REase+TPR+GreAB-C+PIN      | 1332 | -        | Alphaproteobacteria | Hoeflea sp. BAL378              | hypothetical protein [Hoeflea sp. BAL378].                              | GCF_000759435.1 |
| WP_035646445.1 | REase+TPR+TPR+GreAB-C+PIN*→                            | REase+TPR+TPR+GreAB-C+PIN  | 1316 | -        | Alphaproteobacteria | Bradyrhizobium sp. ORS 285      | hypothetical protein [Bradyrhizobium sp. ORS 285].                      | GCF_000239755.1 |
| WP_036748977.1 | HetE-N1→ TPR+GreAB-C+PIN*→                             | TPR+GreAB-C+PIN            | 1130 | -        | Gammaproteobacteria | Photobacterium galathea         | hypothetical protein [Photobacterium galathea].                         | GCF_000695255.1 |
| WP_036783497.1 | HetE-N1→ TPR+GreAB-C+PIN*→                             | TPR+GreAB-C+PIN            | 1104 | -        | Gammaproteobacteria | Photorhabdus aegyptia           | hypothetical protein [Photorhabdus aegyptia].                           | GCF_000612035.1 |
| WP_038397119.1 | <-HTH<-?<-?  HetE-N1→ TPR+GreAB-C+PIN*→                | TPR+GreAB-C+PIN            | 1107 | -        | Gammaproteobacteria | Salmonella enterica             | hypothetical protein [Salmonella enterica].                             | GCF_000756465.1 |
| WP_039292971.1 | TPR+PIN*→                                              | TPR+PIN                    | 1180 | -        | Firmicutes          | Paenibacillus sp. IHB B 3415    | hypothetical protein [Paenibacillus sp. IHB B 3415].                    | GCF_000802655.2 |
| WP_039419134.1 | CHC2+Toprim-DNAG→?→?→?→ HTH→ SIG+TM→ TPR+GreAB-C+PIN*→ | TPR+GreAB-C+PIN            | 1140 | -        | Bacteroidetes       | Porphyromonas gulae             | hypothetical protein [Porphyromonas gulae].                             | GCF_000765945.1 |
| WP_039490314.1 | HetE-N1→ TPR+GreAB-C+PIN*→                             | TPR+GreAB-C+PIN            | 1093 | -        | Gammaproteobacteria | Pectobacterium odoriferum       | hypothetical protein [Pectobacterium odoriferum].                       | GCF_000754765.1 |
| WP_039768974.1 | REase+TPR+GreAB-C+PIN*→                                | REase+TPR+GreAB-C+PIN      | 1438 | -        | Gammaproteobacteria | Pseudomonas fluorescens         | hypothetical protein [Pseudomonas fluorescens].                         | GCF_000817905.1 |
| WP_040182639.1 | REase+TPR+GreAB-C+PIN*→                                | REase+TPR+GreAB-C+PIN      | 1319 | -        | Alphaproteobacteria | Phaeobacter sp. S60             | hypothetical protein [Phaeobacter sp. S60].                             | GCF_000826845.1 |
| WP_040439475.1 | REase+TPR+GreAB-C+PIN*→                                | REase+TPR+GreAB-C+PIN      | 1318 | -        | Alphaproteobacteria | Labrenzia aggregata             | hypothetical protein [Labrenzia aggregata].                             | GCF_000168975.1 |
| WP_041272554.1 | REase+TPR+GreAB-C+PIN*→                                | REase+TPR+GreAB-C+PIN      | 1294 | -        | Firmicutes          | Desulfitobacterium hafniense    | tetratricopeptide repeat protein [Desulfitobacterium hafniense].        | GCF_000010045.1 |



| acc            | operon                             | architecture              | len  | gen.name | taxend              | species                          | define                                                             | gca             |
|----------------|------------------------------------|---------------------------|------|----------|---------------------|----------------------------------|--------------------------------------------------------------------|-----------------|
| WP_041475188.1 | REase+TPR+GreAB-C+PIN*→            | REase+TPR+GreAB-C+PIN     | 1321 | -        | Gammaproteobacteria | Pseudomonas                      | MULTISPECIES: DUF4365 domain-containing protein [Pseudomonas].     | GCF_000012445.1 |
| WP_041609504.1 | HetE-N1→ TPR+GreAB-C+PIN*→         | TPR+GreAB-C+PIN           | 1086 | -        | Gammaproteobacteria | Tolumonas auensis                | hypothetical protein [Tolumonas auensis].                          | GCF_000023065.1 |
| WP_042089608.1 | REase+TPR+GreAB-C+PIN*→            | REase+TPR+GreAB-C+PIN     | 1245 | -        | Gammaproteobacteria | Acinetobacter bereziniae         | hypothetical protein [Acinetobacter bereziniae].                   | GCF_000825165.1 |
| WP_042562078.1 | REase+TPR+GreAB-C+PIN*→            | REase+TPR+GreAB-C+PIN     | 1438 | -        | Gammaproteobacteria | Pseudomonas fluorescens          | hypothetical protein [Pseudomonas fluorescens].                    | GCF_000827755.1 |
| WP_043355224.1 | REase+TPR+GreAB-C+PIN*→            | REase+TPR+GreAB-C+PIN     | 1332 | -        | Betaproteobacteria  | Cupriavidus                      | MULTISPECIES: hypothetical protein [Cupriavidus].                  | GCF_001652915.1 |
| WP_043626766.1 | REase+TPR+TPR+GreAB-C+PIN*→        | REase+TPR+TPR+GreAB-C+PIN | 1357 | -        | Alphaproteobacteria | Ensifer sp. ZNC0028              | hypothetical protein [Ensifer sp. ZNC0028].                        | GCF_000799055.1 |
| WP_043752287.1 | REase+TPR+GreAB-C+PIN*→            | REase+TPR+GreAB-C+PIN     | 1318 | -        | Alphaproteobacteria | Pseudoocenicola atlanticus       | restriction endonuclease [Pseudoocenicola atlanticus].             | GCF_000768315.1 |
| WP_044036524.1 | TPR→ TPR→?→?→ TPR+GreAB-C+PIN*→    | TPR+GreAB-C+PIN           | 473  | -        | Alphaproteobacteria | Octadecabacter arcticus          | hypothetical protein [Octadecabacter arcticus].                    | GCF_000155735.2 |
| WP_044439030.1 | X+PIN*→                            | X+PIN                     | 1051 | -        | Actinobacteria      | Agreia bicolorata                | hypothetical protein [Agreia bicolorata].                          | GCF_000938265.1 |
| WP_045324066.1 | TPR+PIN*→                          | TPR+PIN                   | 1167 | -        | Actinobacteria      | Streptomyces sp. NRRL F-4428     | hypothetical protein [Streptomyces sp. NRRL F-4428].               | GCF_000956015.1 |
| WP_045495160.1 | HetE-N1→ TPR+GreAB-C+PIN*→         | TPR+GreAB-C+PIN           | 1086 | -        | Gammaproteobacteria | Vibrio hyugaensis                | hypothetical protein [Vibrio hyugaensis].                          | GCF_000818475.1 |
| WP_046103485.1 | REase+TPR+GreAB-C+PIN*→            | REase+TPR+GreAB-C+PIN     | 1314 | -        | Alphaproteobacteria | Devosia chinhatensis             | hypothetical protein [Devosia chinhatensis].                       | GCF_000969445.1 |
| WP_047008502.1 | TPR+GreAB-C+PIN*→                  | TPR+GreAB-C+PIN           | 1236 | -        | -                   | Vibrio diabolicus                | hypothetical protein [Vibrio diabolicus].                          | GCF_001010935.1 |
| WP_047057492.1 | HetE-N1→ TPR+GreAB-C+PIN*→         | TPR+GreAB-C+PIN           | 1106 | -        | Gammaproteobacteria | Enterobacter hormaechei          | hypothetical protein [Enterobacter hormaechei].                    | GCF_001011695.1 |
| WP_047274590.1 | REase+TPR+GreAB-C+PIN*→            | REase+TPR+GreAB-C+PIN     | 1321 | -        | Gammaproteobacteria | Pseudomonas                      | MULTISPECIES: DUF4365 domain-containing protein [Pseudomonas].     | GCF_012986325.1 |
| WP_047583000.1 | HetE-N1→ TPR+GreAB-C+PIN*→         | TPR+GreAB-C+PIN           | 1105 | -        | Gammaproteobacteria | unclassified Pseudomonas         | MULTISPECIES: hypothetical protein [unclassified Pseudomonas].     | GCF_000763225.1 |
| WP_047736827.1 | HetE-N1→ HetE-N1+TPR+GreAB-C+PIN*→ | HetE-N1+TPR+GreAB-C+PIN   | 1122 | -        | Gammaproteobacteria | Pseudomonas chlororaphis         | hypothetical protein [Pseudomonas chlororaphis].                   | GCF_001023535.1 |
| WP_047738516.1 | HetE-N1→ TPR+GreAB-C+PIN*→         | TPR+GreAB-C+PIN           | 1111 | -        | Gammaproteobacteria | Pseudomonas chlororaphis         | hypothetical protein [Pseudomonas chlororaphis].                   | GCF_001023535.1 |
| WP_047741525.1 | HetE-N1→ TPR+GreAB-C+PIN*→         | TPR+GreAB-C+PIN           | 1106 | -        | Gammaproteobacteria | Enterobacter cloacae complex     | MULTISPECIES: hypothetical protein [Enterobacter cloacae complex]. | GCF_014982105.1 |
| WP_047744683.1 | HetE-N1→ HetE-N1+TPR+GreAB-C+PIN*→ | HetE-N1+TPR+GreAB-C+PIN   | 1092 | -        | Gammaproteobacteria | Enterobacter ludwigii            | hypothetical protein [Enterobacter ludwigii].                      | GCF_001022445.2 |
| WP_048126291.1 | TPR+GreAB-C+PIN*→                  | TPR+GreAB-C+PIN           | 1292 | -        | Euryarchaeota       | Methanosarcina lacustris         | hypothetical protein [Methanosarcina lacustris].                   | GCF_000970265.1 |
| WP_048377212.1 | REase+TPR+GreAB-C+PIN*→            | REase+TPR+GreAB-C+PIN     | 1321 | -        | Gammaproteobacteria | Pseudomonas                      | MULTISPECIES: DUF4365 domain-containing protein [Pseudomonas].     | GCF_012986365.1 |
| WP_048411963.1 | TPR+GreAB-C+PIN*→                  | TPR+GreAB-C+PIN           | 1163 | -        | Betaproteobacteria  | Chromobacterium sp. LK1          | hypothetical protein [Chromobacterium sp. LK1].                    | GCF_001043555.1 |
| WP_049042149.1 | HetE-N1→ HetE-N1+TPR+GreAB-C+PIN*→ | HetE-N1+TPR+GreAB-C+PIN   | 1094 | -        | Gammaproteobacteria | Citrobacter braakii              | hypothetical protein [Citrobacter braakii].                        | GCF_001059745.1 |
| WP_049582258.1 | HetE-N1→ TPR+GreAB-C+PIN*→         | TPR+GreAB-C+PIN           | 1098 | -        | Gammaproteobacteria | Photorhabdus luminescens         | hypothetical protein [Photorhabdus luminescens].                   | GCF_900102985.1 |
| WP_050091697.1 | HetE-N1→ TPR+GreAB-C+PIN*→         | TPR+GreAB-C+PIN           | 1096 | -        | Gammaproteobacteria | Yersinia pseudotuberculosis      | hypothetical protein [Yersinia pseudotuberculosis].                | GCF_001123345.1 |
| WP_050298251.1 | HetE-N1→ TPR+GreAB-C+PIN*→         | TPR+GreAB-C+PIN           | 1095 | -        | Gammaproteobacteria | Yersinia enterocolitica          | hypothetical protein [Yersinia enterocolitica].                    | GCF_001160345.1 |
| WP_050323220.1 | HetE-N1→ TPR+GreAB-C+PIN*→         | TPR+GreAB-C+PIN           | 1121 | -        | Gammaproteobacteria | Yersinia enterocolitica          | hypothetical protein [Yersinia enterocolitica].                    | GCF_001182365.1 |
| WP_050376143.1 | TPR+GreAB-C+PIN*→   <-HTH+HTH      | TPR+GreAB-C+PIN           | 872  | -        | Betaproteobacteria  | Burkholderia pseudomallei        | hypothetical protein [Burkholderia pseudomallei].                  | GCF_006538545.1 |
| WP_050590144.1 | REase+TPR+GreAB-C+PIN*→            | REase+TPR+GreAB-C+PIN     | 1423 | -        | Gammaproteobacteria | Pseudomonas sp. URM017WK12:112   | hypothetical protein [Pseudomonas sp. URM017WK12:112].             | GCF_000514395.1 |
| WP_051097719.1 | TPR+GreAB-C+PIN*→                  | TPR+GreAB-C+PIN           | 1140 | -        | Gammaproteobacteria | Pseudomonas sp. 10-1B            | hypothetical protein [Pseudomonas sp. 10-1B].                      | GCF_000935045.1 |
| WP_051560695.1 | HetE-N1→ TPR+GreAB-C+PIN*→         | TPR+GreAB-C+PIN           | 1098 | -        | Gammaproteobacteria | Photorhabdus aegyptia            | hypothetical protein [Photorhabdus aegyptia].                      | GCF_000612035.1 |
| WP_051570263.1 | REase+TPR+GreAB-C+PIN*→            | REase+TPR+GreAB-C+PIN     | 1248 | -        | Actinobacteria      | Cryptosporangium arvum           | DUF4365 domain-containing protein [Cryptosporangium arvum].        | GCF_000585375.1 |
| WP_052241169.1 | REase+TPR+GreAB-C+PIN*→            | REase+TPR+GreAB-C+PIN     | 1236 | -        | Actinobacteria      | Microbacterium hominis           | DUF4365 domain-containing protein [Microbacterium hominis].        | GCF_000813805.1 |
| WP_052515067.1 | PNPase+TPR+GreAB-C+PIN*→           | PNPase+TPR+GreAB-C+PIN    | 1617 | -        | Deltaproteobacteria | Dethiosulfatarculus sandiegensis | hypothetical protein [Dethiosulfatarculus sandiegensis].           | GCF_000931935.2 |
| WP_052917795.1 | HetE-N1→ TPR+GreAB-C+PIN*→         | TPR+GreAB-C+PIN           | 1094 | -        | Gammaproteobacteria | Escherichia coli                 | hypothetical protein [Escherichia coli].                           | GCF_001265885.1 |
| WP_053052653.1 | HetE-N1→ TPR+GreAB-C+PIN*→         | TPR+GreAB-C+PIN           | 1129 | -        | Gammaproteobacteria | Vibrio harveyi                   | hypothetical protein [Vibrio harveyi].                             | GCF_001262735.1 |
| WP_053269091.1 | REase+TPR+GreAB-C+PIN*→            | REase+TPR+GreAB-C+PIN     | 1438 | -        | Gammaproteobacteria | Pseudomonas chlororaphis         | hypothetical protein [Pseudomonas chlororaphis].                   | GCF_001269595.1 |
| WP_053316591.1 | TPR+GreAB-C+PIN*→                  | TPR+GreAB-C+PIN           | 982  | -        | Gammaproteobacteria | Vibrio parahaemolyticus          | hypothetical protein [Vibrio parahaemolyticus].                    | GCF_001268015.1 |
| WP_053446146.1 | TPR+PIN*→                          | TPR+PIN                   | 1160 | -        | Firmicutes          | Bacillus toyonensis              | hypothetical protein [Bacillus toyonensis].                        | GCF_001275045.2 |

| acc            | operon                                                  | architecture              | len  | gen.name | taxend              | species                                | define                                                                      | gca             |
|----------------|---------------------------------------------------------|---------------------------|------|----------|---------------------|----------------------------------------|-----------------------------------------------------------------------------|-----------------|
| WP_053882512.1 | HetE-N1→ TPR+GreAB-C+PIN*→                              | TPR+GreAB-C+PIN           | 1094 | -        | Gammaproteobacteria | Escherichia coli                       | hypothetical protein [Escherichia coli].                                    | GCF_001284445.1 |
| WP_054070021.1 | TPR+GreAB-C+PIN*→                                       | TPR+GreAB-C+PIN           | 1140 | -        | Gammaproteobacteria | Pseudomonas syringae group genomosp. 3 | hypothetical protein [Pseudomonas syringae group genomosp. 3].              | GCF_016803175.1 |
| WP_054211402.1 | BirA-HTH→ HEPN→ REase+TPR+TPR+GreAB-C+PIN*→             | REase+TPR+TPR+GreAB-C+PIN | 1333 | -        | Alphaproteobacteria | Bosea vaviloviae                       | hypothetical protein [Bosea vaviloviae].                                    | GCF_001298265.1 |
| WP_054464024.1 | HetE-N1→ TPR+GreAB-C+PIN*→                              | TPR+GreAB-C+PIN           | 1094 | -        | Gammaproteobacteria | Escherichia coli                       | hypothetical protein [Escherichia coli].                                    | GCF_001277455.1 |
| WP_055843189.1 | REase+TPR+GreAB-C+PIN*→                                 | REase+TPR+GreAB-C+PIN     | 1293 | -        | Alphaproteobacteria | Sphingomonas sp. Leaf343               | tetratricopeptide repeat protein [Sphingomonas sp. Leaf343].                | GCF_001423765.1 |
| WP_056497005.1 | TPR+GreAB-C+PIN*→                                       | TPR+GreAB-C+PIN           | 1110 | -        | Alphaproteobacteria | Methylobacterium sp. Leaf111           | hypothetical protein [Methylobacterium sp. Leaf111].                        | GCF_001423285.1 |
| WP_056734772.1 | TPR+PIN*→                                               | TPR+PIN                   | 1204 | -        | Actinobacteria      | Agromyces sp. Soil535                  | hypothetical protein [Agromyces sp. Soil535].                               | GCF_001428255.1 |
| WP_056836493.1 | TPR+PIN*→                                               | TPR+PIN                   | 1174 | -        | Firmicutes          | Paenibacillus sp. Soil787              | hypothetical protein [Paenibacillus sp. Soil787].                           | GCF_001429545.1 |
| WP_057430028.1 | REase+TPR+GreAB-C+PIN*→                                 | REase+TPR+GreAB-C+PIN     | 1438 | -        | Gammaproteobacteria | Pseudomonas syringae group genomosp. 3 | hypothetical protein [Pseudomonas syringae group genomosp. 3].              | GCF_001401385.1 |
| WP_057580842.1 | TPR+GreAB-C+PIN*→                                       | TPR+GreAB-C+PIN           | 1233 | -        | Firmicutes          | Paeniclostridium sordellii             | hypothetical protein [Paeniclostridium sordellii].                          | GCF_001373055.1 |
| WP_057657430.1 | REase+TPR+GreAB-C+PIN*→                                 | REase+TPR+GreAB-C+PIN     | 1287 | -        | Gammaproteobacteria | Pseudoxanthomonas dokdonensis          | tetratricopeptide repeat protein [Pseudoxanthomonas dokdonensis].           | GCF_001431405.1 |
| WP_057831910.1 | HetE-N1→ TPR+GreAB-C+PIN*→                              | TPR+GreAB-C+PIN           | 1091 | -        | Gammaproteobacteria | Colwellia sp. TT2012                   | hypothetical protein [Colwellia sp. TT2012].                                | GCF_001440345.1 |
| WP_057932289.1 | TPR+GreAB-C+PIN*→                                       | TPR+GreAB-C+PIN           | 1276 | -        | Bacteroidetes       | Pedobacter ginsenosidimutans           | tetratricopeptide repeat protein [Pedobacter ginsenosidimutans].            | GCF_001442625.1 |
| WP_058039540.1 | TPR+GreAB-C+PIN*→   <-HTH+HTH                           | TPR+GreAB-C+PIN           | 872  | -        | Betaproteobacteria  | Burkholderia pseudomallei              | hypothetical protein [Burkholderia pseudomallei].                           | GCF_001445875.1 |
| WP_058297418.1 | TPR+PIN*→                                               | TPR+PIN                   | 1225 | -        | Firmicutes          | Bacillus enclensis                     | hypothetical protein [Bacillus enclensis].                                  | GCF_900094975.1 |
| WP_058461037.1 | TPR+PIN*→                                               | TPR+PIN                   | 1277 | -        | Gammaproteobacteria | Fluoribacter bozemaniae                | hypothetical protein [Fluoribacter bozemaniae].                             | GCF_900640135.1 |
| WP_058587024.1 | <-MarR-HTH  ?→?→?→   <-?  ?→ HetE-N1→ TPR+GreAB-C+PIN*→ | TPR+GreAB-C+PIN           | 1117 | -        | Gammaproteobacteria | Citrobacter amalonaticus               | hypothetical protein [Citrobacter amalonaticus].                            | GCF_001471655.2 |
| WP_058721158.1 | REase+TPR+GreAB-C+PIN*→                                 | REase+TPR+GreAB-C+PIN     | 1509 | -        | Betaproteobacteria  | Paucibacter sp. KCTC 42545             | hypothetical protein [Paucibacter sp. KCTC 42545].                          | GCF_001477625.1 |
| WP_058751880.1 | REase+TPR+GreAB-C+PIN*→                                 | REase+TPR+GreAB-C+PIN     | 1317 | -        | Alphaproteobacteria | Sphingomonas sanguinis                 | tetratricopeptide repeat protein [Sphingomonas sanguinis].                  | GCF_001476905.1 |
| WP_058820070.1 | <-HTH<-?<-?  HetE-N1→ TPR+GreAB-C+PIN*→                 | TPR+GreAB-C+PIN           | 1107 | -        | Gammaproteobacteria | Salmonella enterica                    | hypothetical protein [Salmonella enterica].                                 | GCF_001952125.1 |
| WP_059294982.1 | HetE-N1→ TPR+GreAB-C+PIN*→                              | TPR+GreAB-C+PIN           | 1106 | -        | Gammaproteobacteria | Enterobacter hormaechei                | hypothetical protein [Enterobacter hormaechei].                             | GCF_001518595.1 |
| WP_059458986.1 | REase+TPR+GreAB-C+PIN*→                                 | REase+TPR+GreAB-C+PIN     | 1335 | -        | Betaproteobacteria  | Burkholderia vietnamiensis             | hypothetical protein [Burkholderia vietnamiensis].                          | GCF_001523785.1 |
| WP_059543415.1 | TPR+GreAB-C+PIN*→   <-HTH+HTH                           | TPR+GreAB-C+PIN           | 872  | -        | Betaproteobacteria  | Burkholderia                           | MULTISPECIES: hypothetical protein [Burkholderia].                          | GCF_001523065.1 |
| WP_059687512.1 | REase+TPR+GreAB-C+PIN*→                                 | REase+TPR+GreAB-C+PIN     | 1355 | -        | Betaproteobacteria  | Burkholderia cepacia                   | hypothetical protein [Burkholderia cepacia].                                | GCF_001524765.1 |
| WP_059702921.1 | REase+TPR→ TPR+GreAB-C+PIN*→                            | TPR+GreAB-C+PIN           | 954  | -        | Betaproteobacteria  | Burkholderia sp. RF2-non_BP3           | hypothetical protein [Burkholderia sp. RF2-non_BP3].                        | GCF_001522185.1 |
| WP_059764594.1 | REase+TPR+GreAB-C+PIN*→                                 | REase+TPR+GreAB-C+PIN     | 1321 | -        | Gammaproteobacteria | unclassified Pseudomonas               | MULTISPECIES: DUF4365 domain-containing protein [unclassified Pseudomonas]. | GCF_001529305.1 |
| WP_059837999.1 | TPR+GreAB-C+PIN*→   <-HTH+HTH                           | TPR+GreAB-C+PIN           | 872  | -        | Betaproteobacteria  | Burkholderia ubonensis                 | hypothetical protein [Burkholderia ubonensis].                              | GCF_001528175.1 |
| WP_059992407.1 | REase+TPR+GreAB-C+PIN*→                                 | REase+TPR+GreAB-C+PIN     | 1345 | -        | Betaproteobacteria  | Burkholderia ubonensis                 | hypothetical protein [Burkholderia ubonensis].                              | GCF_001527095.1 |
| WP_060002797.1 | TPR+GreAB-C+PIN*→                                       | TPR+GreAB-C+PIN           | 872  | -        | Betaproteobacteria  | Burkholderia gladioli                  | hypothetical protein [Burkholderia gladioli].                               | GCF_902831175.1 |
| WP_060217774.1 | REase+TPR+GreAB-C+PIN*→                                 | REase+TPR+GreAB-C+PIN     | 1355 | -        | Betaproteobacteria  | Burkholderia cepacia                   | hypothetical protein [Burkholderia cepacia].                                | GCF_001530905.1 |
| WP_060322122.1 | REase+TPR+GreAB-C+PIN*→                                 | REase+TPR+GreAB-C+PIN     | 1351 | -        | Betaproteobacteria  | Burkholderia ubonensis                 | hypothetical protein [Burkholderia ubonensis].                              | GCF_001718975.1 |
| WP_060322181.1 | REase+TPR+GreAB-C+PIN*→   <-HEPN                        | REase+TPR+GreAB-C+PIN     | 1345 | -        | Betaproteobacteria  | Burkholderia diffusa                   | hypothetical protein [Burkholderia diffusa].                                | GCF_001533185.1 |
| WP_060360485.1 | REase+TPR+GreAB-C+PIN*→   <-HEPN                        | REase+TPR+GreAB-C+PIN     | 1351 | -        | Betaproteobacteria  | Burkholderia territorii                | hypothetical protein [Burkholderia territorii].                             | GCF_001533385.1 |
| WP_061510730.1 | REase+TPR+GreAB-C+PIN*→                                 | REase+TPR+GreAB-C+PIN     | 1304 | -        | Alphaproteobacteria | Gluconobacter thailandicus             | hypothetical protein [Gluconobacter thailandicus].                          | GCF_001580835.1 |
| WP_061928567.1 | REase+TPR+GreAB-C+PIN*→                                 | REase+TPR+GreAB-C+PIN     | 1323 | -        | Alphaproteobacteria | Gluconobacter japonicus                | hypothetical protein [Gluconobacter japonicus].                             | GCF_001580865.1 |
| WP_062265952.1 | REase+TPR+GreAB-C+PIN*→                                 | REase+TPR+GreAB-C+PIN     | 1319 | -        | Euryarchaeota       | Methanoculleus bourgensis              | tetratricopeptide repeat protein [Methanoculleus bourgensis].               | GCF_900036045.1 |
| WP_062316067.1 | TPR+PIN*→                                               | TPR+PIN                   | 1207 | -        | Actinobacteria      | Demequina maris                        | hypothetical protein [Demequina maris].                                     | GCF_000971375.1 |
| WP_062477592.1 | HetE-N1→ TPR+GreAB-C+PIN*→                              | TPR+GreAB-C+PIN           | 1109 | -        | Gammaproteobacteria | Lacimicrobium alkaliphilum             | hypothetical protein [Lacimicrobium alkaliphilum].                          | GCF_001466725.1 |
| WP_062692005.1 | HetE-N1→ TPR+GreAB-C+PIN*→                              | TPR+GreAB-C+PIN           | 941  | -        | Gammaproteobacteria | Photobacterium sanguinicanri           | hypothetical protein [Photobacterium sanguinicanri].                        | GCF_001563765.1 |

| acc            | operon                                      | architecture              | len  | gen.name | taxend              | species                        | define                                                                                 | gca             |
|----------------|---------------------------------------------|---------------------------|------|----------|---------------------|--------------------------------|----------------------------------------------------------------------------------------|-----------------|
| WP_062794399.1 | REase+TPR+GreAB-C+PIN*→                     | REase+TPR+GreAB-C+PIN     | 1127 | -        | Betaproteobacteria  | Cupriavidus metallidurans      | hypothetical protein, partial [Cupriavidus metallidurans].                             | GCF_001598775.1 |
| WP_063146823.1 | HetE-N1→ TPR+GreAB-C+PIN*→                  | TPR+GreAB-C+PIN           | 1106 | -        | Gammaproteobacteria | Enterobacter cloacae complex   | MULTISPECIES: hypothetical protein [Enterobacter cloacae complex].                     | GCF_013635495.1 |
| WP_063496996.1 | TIR+DnaB→ REase+TPR+GreAB-C+PIN*→           | REase+TPR+GreAB-C+PIN     | 1364 | -        | Betaproteobacteria  | Paraburkholderia phytofirmans  | hypothetical protein [Paraburkholderia phytofirmans].                                  | GCF_001634365.1 |
| WP_063800929.1 | REase+TPR+GreAB-C+PIN*→                     | REase+TPR+GreAB-C+PIN     | 1351 | -        | Betaproteobacteria  | Burkholderia ubonensis         | hypothetical protein [Burkholderia ubonensis].                                         | GCF_001526225.1 |
| WP_063809712.1 | HetE-N1→ TPR+GreAB-C+PIN*→                  | TPR+GreAB-C+PIN           | 1117 | -        | Gammaproteobacteria | Salmonella enterica            | hypothetical protein [Salmonella enterica].                                            | GCF_008727555.1 |
| WP_063897359.1 | REase+TPR+GreAB-C+PIN*→                     | REase+TPR+GreAB-C+PIN     | 1351 | -        | Betaproteobacteria  | Burkholderia ubonensis         | hypothetical protein [Burkholderia ubonensis].                                         | GCF_001529725.1 |
| WP_063906337.1 | REase+TPR+GreAB-C+PIN*→                     | REase+TPR+GreAB-C+PIN     | 1354 | -        | Betaproteobacteria  | Burkholderia ubonensis         | hypothetical protein [Burkholderia ubonensis].                                         | GCF_001534425.1 |
| WP_063932878.1 | HetE-N1→ TPR+GreAB-C+PIN*→                  | TPR+GreAB-C+PIN           | 1034 | -        | Gammaproteobacteria | Enterobacter hormaechei        | hypothetical protein [Enterobacter hormaechei].                                        | GCF_900076145.1 |
| WP_064273010.1 | REase+TPR+GreAB-C+PIN*→                     | REase+TPR+GreAB-C+PIN     | 1328 | -        | Alphaproteobacteria | Gluconobacter cerinus          | tetratricopeptide repeat protein [Gluconobacter cerinus].                              | GCF_001645165.1 |
| WP_064374215.1 | HetE-N1→ TPR+GreAB-C+PIN*→                  | TPR+GreAB-C+PIN           | 1116 | -        | Gammaproteobacteria | Pantoea ananatis               | hypothetical protein [Pantoea ananatis].                                               | GCF_001543055.1 |
| WP_064477497.1 | TPR+GreAB-C+PIN*→                           | TPR+GreAB-C+PIN           | 879  | -        | Betaproteobacteria  | Ralstonia                      | MULTISPECIES: hypothetical protein [Ralstonia].                                        | GCF_014884725.1 |
| WP_065176860.1 | HetE-N1→ GreAB-C*→                          | GreAB-C                   | 1123 | -        | Gammaproteobacteria | Photobacterium aquimaris       | hypothetical protein [Photobacterium aquimaris].                                       | GCF_001676065.1 |
| WP_065192964.1 | HetE-N1→ GreAB-C*→                          | GreAB-C                   | 1128 | -        | Gammaproteobacteria | Photobacterium phosphoreum     | hypothetical protein [Photobacterium phosphoreum].                                     | GCF_001676135.1 |
| WP_065645553.1 | HetE-N1→ TPR+GreAB-C+PIN*→                  | TPR+GreAB-C+PIN           | 1085 | -        | Gammaproteobacteria | Vibrio diabolicus              | hypothetical protein [Vibrio diabolicus].                                              | GCF_001691185.1 |
| WP_065663920.1 | BirA-HTH→ HEPN→ REase+TPR+TPR+GreAB-C+PIN*→ | REase+TPR+TPR+GreAB-C+PIN | 1333 | -        | Alphaproteobacteria | Agrobacterium sp. B131/95      | GreA/GreB family elongation factor [Agrobacterium sp. B131/95].                        | GCF_001692155.1 |
| WP_065996373.1 | REase+TPR+GreAB-C+PIN*→                     | REase+TPR+GreAB-C+PIN     | 1244 | -        | Gammaproteobacteria | Acinetobacter baumannii        | hypothetical protein [Acinetobacter baumannii].                                        | GCF_001704675.1 |
| WP_066036869.1 | TPR+PIN*→                                   | TPR+PIN                   | 1175 | -        | Firmicutes          | Lysinibacillus sp. AR18-8      | hypothetical protein [Lysinibacillus sp. AR18-8].                                      | GCF_001705465.1 |
| WP_066542710.1 | REase+TPR+GreAB-C+PIN*→                     | REase+TPR+GreAB-C+PIN     | 1122 | -        | Alphaproteobacteria | Sphingomonas sp. CCH18-B1      | tetratricopeptide repeat protein [Sphingomonas sp. CCH18-B1].                          | GCF_001555895.1 |
| WP_066945120.1 | HTH+PNPase+PIN*→                            | HTH+PNPase+PIN            | 1527 | -        | Actinobacteria      | Streptomyces lushanensis       | 5'-methylthioadenosine/S-adenosylhomocysteine nucleosidase [Streptomyces lushanensis]. | GCF_001700515.1 |
| WP_067386574.1 | REase+TPR+GreAB-C+PIN*→                     | REase+TPR+GreAB-C+PIN     | 1361 | -        | Gammaproteobacteria | Marinobacterium aestuarii      | hypothetical protein [Marinobacterium aestuarii].                                      | GCF_001651805.1 |
| WP_067584887.1 | GreAB-C*→                                   | GreAB-C                   | 1154 | -        | Gammaproteobacteria | Endozoicomonas ascidiicola     | hypothetical protein [Endozoicomonas ascidiicola].                                     | GCF_001646955.1 |
| WP_067776912.1 | PNPase+TPR+GreAB-C+PIN*→                    | PNPase+TPR+GreAB-C+PIN    | 1386 | -        | Cyanobacteria       | Nostoc sp. NIES-3756           | hypothetical protein [Nostoc sp. NIES-3756].                                           | GCF_001548375.1 |
| WP_067990948.1 | TPR+PIN*→   <-KAP_NTPase                    | TPR+PIN                   | 1216 | -        | Actinobacteria      | Mycobacterium sp. YC-RL4       | hypothetical protein [Mycobacterium sp. YC-RL4].                                       | GCF_001644575.1 |
| WP_068215362.1 | TPR+GreAB-C+PIN*→                           | TPR+GreAB-C+PIN           | 1166 | -        | Bacteroidetes       | Roseivirga spongicola          | hypothetical protein [Roseivirga spongicola].                                          | GCF_001592965.1 |
| WP_069047857.1 | REase+TPR+GreAB-C+PIN*→                     | REase+TPR+GreAB-C+PIN     | 1383 | -        | Betaproteobacteria  | Hydrogenophaga sp. RAC07       | hypothetical protein [Hydrogenophaga sp. RAC07].                                       | GCF_001713375.1 |
| WP_069206296.1 | REase+TPR+GreAB-C+PIN*→                     | REase+TPR+GreAB-C+PIN     | 1323 | -        | Alphaproteobacteria | Sphingomonas panacis           | hypothetical protein [Sphingomonas panacis].                                           | GCF_001717955.1 |
| WP_069604736.1 | TPR+GreAB-C+PIN*→                           | TPR+GreAB-C+PIN           | 1147 | -        | Firmicutes          | Bacillus cereus group          | MULTISPECIES: tetratricopeptide repeat protein [Bacillus cereus group].                | GCF_001729295.1 |
| WP_069859257.1 | TPR+GreAB-C+PIN*→                           | TPR+GreAB-C+PIN           | 1244 | -        | Bacteroidetes       | Arenibacter sp. NBRC 103722    | hypothetical protein [Arenibacter sp. NBRC 103722].                                    | GCF_001748465.2 |
| WP_069931472.1 | REase+PIN*→                                 | REase+PIN                 | 1282 | -        | Actinobacteria      | Streptomyces agglomeratus      | DUF4365 domain-containing protein [Streptomyces agglomeratus].                         | GCF_001746465.1 |
| WP_070715046.1 | HetE-N1→ TPR+GreAB-C+PIN*→                  | TPR+GreAB-C+PIN           | 1094 | -        | Gammaproteobacteria | Hafnia sp. HMSC23F03           | hypothetical protein [Hafnia sp. HMSC23F03].                                           | GCF_001816025.1 |
| WP_070991866.1 | HetE-N1→ TPR+GreAB-C+PIN*→                  | TPR+GreAB-C+PIN           | 1106 | -        | Gammaproteobacteria | Pseudoalteromonas byunsanensis | hypothetical protein [Pseudoalteromonas byunsanensis].                                 | GCF_001854475.1 |
| WP_071234936.1 | HetE-N1→ TPR+GreAB-C+PIN*→                  | TPR+GreAB-C+PIN           | 1111 | -        | Gammaproteobacteria | Vibrio rotiferianus            | hypothetical protein [Vibrio rotiferianus].                                            | GCF_001858245.1 |
| WP_071684330.1 | HetE-N1→ HetE-N1+TPR+GreAB-C+PIN*→          | HetE-N1+TPR+GreAB-C+PIN   | 1094 | -        | Gammaproteobacteria | Citrobacter freundii           | hypothetical protein [Citrobacter freundii].                                           | GCF_014901875.1 |
| WP_071741873.1 | TPR+PIN*→                                   | TPR+PIN                   | 1160 | -        | Firmicutes          | Bacillus paranthracis          | hypothetical protein [Bacillus paranthracis].                                          | GCF_001883995.1 |
| WP_071769547.1 | PIN*→                                       | PIN                       | 341  | -        | Betaproteobacteria  | Burkholderia ubonensis         | hypothetical protein [Burkholderia ubonensis].                                         | GCF_001882755.1 |
| WP_071890709.1 | TPR+GreAB-C+PIN*→   <-HTH                   | TPR+GreAB-C+PIN           | 1157 | -        | Gammaproteobacteria | Pseudomonas putida             | tetratricopeptide repeat protein [Pseudomonas putida].                                 | GCF_001886975.1 |
| WP_072702162.1 | TPR+GreAB-C+PIN*→                           | TPR+GreAB-C+PIN           | 1125 | -        | Alphaproteobacteria | Donghicola eburneus            | hypothetical protein [Donghicola eburneus].                                            | GCF_900095785.1 |

| acc            | operon                                                    | architecture               | len  | gen.name | taxend                | species                        | define                                                            | gca             |
|----------------|-----------------------------------------------------------|----------------------------|------|----------|-----------------------|--------------------------------|-------------------------------------------------------------------|-----------------|
| WP_073552134.1 | TPR+GreAB-C+PIN*→                                         | TPR+GreAB-C+PIN            | 1131 | -        | Bacteroidetes         | Elizabethkingia meningoseptica | hypothetical protein [Elizabethkingia meningoseptica].            | GCF_900143665.1 |
| WP_073772512.1 | REase+PIN*→                                               | REase+PIN                  | 1292 | -        | Actinobacteria        | Streptomyces sp. MJM1172       | DUF4365 domain-containing protein [Streptomyces sp. MJM1172].     | GCF_001905425.1 |
| WP_074449514.1 | CHC2+Toprim-DNAG→?→?→?→ HTH→ SIG+TM→ TPR+GreAB-C+PIN*→    | TPR+GreAB-C+PIN            | 1141 | -        | Bacteroidetes         | Tannerella forsythia           | hypothetical protein [Tannerella forsythia].                      | GCF_900096735.1 |
| WP_074452850.1 | CHC2+Toprim-DNAG→?→ PSE→?→ HTH→ SIG+TM→ TPR+GreAB-C+PIN*→ | TPR+GreAB-C+PIN            | 1141 | -        | Bacteroidetes         | Bacteroidales                  | MULTISPECIES: hypothetical protein [Bacteroidales].               | GCF_900096725.1 |
| WP_074647048.1 | TPR+GreAB-C+PIN*→                                         | TPR+GreAB-C+PIN            | 1184 | -        | Alphaproteobacteria   | Celeribacter baekdonensis      | hypothetical protein [Celeribacter baekdonensis].                 | GCF_900102315.1 |
| WP_074661038.1 | TPR+GreAB-C+PIN*→                                         | TPR+GreAB-C+PIN            | 1127 | -        | Bacteroidetes         | Flavobacterium frigidimaris    | hypothetical protein [Flavobacterium frigidimaris].               | GCF_002217275.1 |
| WP_074804411.1 | REase+TPR+GreAB-C+PIN*→                                   | REase+TPR+GreAB-C+PIN      | 1335 | -        | Betaproteobacteria    | Burkholderia cenocepacia       | hypothetical protein [Burkholderia cenocepacia].                  | GCF_900100915.1 |
| WP_074854446.1 | TPR+GreAB-C+PIN*→                                         | TPR+GreAB-C+PIN            | 1161 | -        | Gammaproteobacteria   | Pseudomonas salomonii          | hypothetical protein [Pseudomonas salomonii].                     | GCF_900107155.1 |
| WP_075042282.1 | REase+TPR+TPR+GreAB-C+PIN*→                               | REase+TPR+TPR+GreAB-C+PIN  | 1332 | -        | Alphaproteobacteria   | Brucella intermedia            | GreA/GreB family elongation factor [Brucella intermedia].         | GCF_001917355.1 |
| WP_075481088.1 | TPR+GreAB-C+PIN*→                                         | TPR+GreAB-C+PIN            | 1236 | -        | Gammaproteobacteria   | Moritella viscosa              | hypothetical protein [Moritella viscosa].                         | GCF_900120145.1 |
| WP_075594884.1 | REase+TPR+GreAB-C+PIN*→                                   | REase+TPR+GreAB-C+PIN      | 1086 | -        | Alphaproteobacteria   | Komagataeibacter hansenii      | hypothetical protein [Komagataeibacter hansenii].                 | GCF_001938745.1 |
| WP_076004144.1 | REase+TPR+GreAB-C+PIN*→                                   | REase+TPR+GreAB-C+PIN      | 1301 | -        | Chloroflexi           | Dehalogenimonas formicexedens  | hypothetical protein [Dehalogenimonas formicexedens].             | GCF_001953175.1 |
| WP_076215124.1 | TPR+PIN*→                                                 | TPR+PIN                    | 1179 | -        | Firmicutes            | Paenibacillus odorifer         | tetratricopeptide repeat protein [Paenibacillus odorifer].        | GCF_001954655.1 |
| WP_076272073.1 | TPR+PIN*→                                                 | TPR+PIN                    | 1180 | -        | Firmicutes            | Paenibacillus odorifer         | hypothetical protein [Paenibacillus odorifer].                    | GCF_001954285.1 |
| WP_076387298.1 | TPR+GreAB-C+PIN*→                                         | TPR+GreAB-C+PIN            | 1130 | -        | Bacteroidetes         | Kaistella chaponensis          | hypothetical protein [Kaistella chaponensis].                     | GCF_900156725.1 |
| WP_076506278.1 | TPR+GreAB-C+PIN*→                                         | TPR+GreAB-C+PIN            | 1137 | -        | Bacteroidetes         | Chryseobacterium shigense      | hypothetical protein [Chryseobacterium shigense].                 | GCF_900156575.1 |
| WP_076822916.1 | REase+TPR+GreAB-C+PIN*→                                   | REase+TPR+GreAB-C+PIN      | 1162 | -        | Actinobacteria        | Frankia asymbiotica            | hypothetical protein [Frankia asymbiotica].                       | GCF_001983105.1 |
| WP_076832171.1 | TPR+GreAB-C+PIN*→                                         | TPR+GreAB-C+PIN            | 1129 | -        | Alphaproteobacteria   | Bradyrhizobium sp. UFLA 03-321 | hypothetical protein [Bradyrhizobium sp. UFLA 03-321].            | GCF_001969825.1 |
| WP_076835387.1 | REase+TPR+GreAB-C+PIN*→                                   | REase+TPR+GreAB-C+PIN      | 1345 | -        | Betaproteobacteria    | Burkholderia pseudomallei      | hypothetical protein [Burkholderia pseudomallei].                 | GCF_001980695.1 |
| WP_078005484.1 | TPR+GreAB-C+PIN*→                                         | TPR+GreAB-C+PIN            | 1131 | -        | Bacteroidetes         | Flavobacterium sp. KBS0721     | hypothetical protein [Flavobacterium sp. KBS0721].                | GCF_002007065.3 |
| WP_078350655.1 | TPR+GreAB-C+PIN*→                                         | TPR+GreAB-C+PIN            | 1286 | -        | Bacteroidetes         | Mucilagibacter pedocola        | hypothetical protein [Mucilagibacter pedocola].                   | GCF_002013915.1 |
| WP_078403924.1 | TPR+GreAB-C+PIN*→                                         | TPR+GreAB-C+PIN            | 1140 | -        | Bacteroidetes         | Elizabethkingia ursingii       | hypothetical protein [Elizabethkingia ursingii].                  | GCF_002022125.1 |
| WP_078946818.1 | REase+PIN*→                                               | REase+PIN                  | 1277 | -        | Actinobacteria        | Streptomyces sp. NRRL B-3648   | DUF4365 domain-containing protein [Streptomyces sp. NRRL B-3648]. | GCF_001279545.1 |
| WP_079454673.1 | REase+TPR+GreAB-C+PIN*→   <-?  HTH→                       | REase+TPR+GreAB-C+PIN      | 1250 | -        | Gammaproteobacteria   | Acinetobacter baumannii        | GreA/GreB family elongation factor [Acinetobacter baumannii].     | GCF_902728005.1 |
| WP_079469502.1 | TPR+GreAB-C+PIN*→                                         | TPR+GreAB-C+PIN            | 1234 | -        | Bacteroidetes         | Chitinophaga ginsengisegetis   | hypothetical protein [Chitinophaga ginsengisegetis].              | GCF_900168065.1 |
| WP_079579807.1 | X+PIN*→                                                   | X+PIN                      | 1007 | -        | Epsilonproteobacteria | Malaciobacter marinus          | hypothetical protein [Malaciobacter marinus].                     | GCF_900168035.1 |
| WP_079820569.1 | HetE-N1→ TPR+GreAB-C+PIN*→                                | TPR+GreAB-C+PIN            | 1117 | -        | Gammaproteobacteria   | Salmonella enterica            | hypothetical protein [Salmonella enterica].                       | GCF_016071195.1 |
| WP_079943789.1 | <-HTH<-?<-?  HetE-N1→ TPR+GreAB-C+PIN*→                   | TPR+GreAB-C+PIN            | 998  | -        | Gammaproteobacteria   | Salmonella enterica            | hypothetical protein [Salmonella enterica].                       | GCF_002045995.1 |
| WP_079951728.1 | <-HTH<-?<-?  HetE-N1→ TPR+GreAB-C+PIN*→                   | TPR+GreAB-C+PIN            | 993  | -        | Gammaproteobacteria   | Salmonella enterica            | hypothetical protein [Salmonella enterica].                       | GCF_002052255.1 |
| WP_079954008.1 | <-HTH<-?<-?  HetE-N1→ TPR+GreAB-C+PIN*→                   | TPR+GreAB-C+PIN            | 998  | -        | Gammaproteobacteria   | Salmonella enterica            | hypothetical protein [Salmonella enterica].                       | GCF_002045095.1 |
| WP_079959318.1 | HetE-N1→ TPR+GreAB-C+PIN*→                                | TPR+GreAB-C+PIN            | 1119 | -        | Gammaproteobacteria   | Salmonella enterica            | hypothetical protein [Salmonella enterica].                       | GCF_002046115.1 |
| WP_079973127.1 | <-HTH<-?<-?  HetE-N1→ TPR+GreAB-C+PIN*→                   | TPR+GreAB-C+PIN            | 1106 | -        | Gammaproteobacteria   | Salmonella enterica            | hypothetical protein [Salmonella enterica].                       | GCF_002046215.1 |
| WP_080170163.1 | HetE-N1→ TPR+GreAB-C+PIN*→                                | TPR+GreAB-C+PIN            | 1106 | -        | Gammaproteobacteria   | Salmonella enterica            | hypothetical protein [Salmonella enterica].                       | GCF_016863875.1 |
| WP_080323117.1 | REase+TPR+GreAB-C+PIN*→                                   | REase+TPR+GreAB-C+PIN      | 1334 | -        | Betaproteobacteria    | Burkholderia cenocepacia       | hypothetical protein [Burkholderia cenocepacia].                  | GCF_002071875.1 |
| WP_080865316.1 | PIN+GNAT→?→?→ REase+TPR+GreAB-C+PIN*→                     | REase+TPR+GreAB-C+PIN      | 1290 | -        | Alphaproteobacteria   | Agrobacterium tumefaciens      | hypothetical protein [Agrobacterium tumefaciens].                 | GCF_900012605.1 |
| WP_081143626.1 | TPR+PIN*→                                                 | TPR+PIN                    | 1157 | -        | Firmicutes            | Bacillus cereus                | hypothetical protein [Bacillus cereus].                           | GCF_002078195.1 |
| WP_082055264.1 | NACHT→ REase+TPR+GreAB-C+PIN*→                            | REase+TPR+GreAB-C+PIN      | 1329 | -        | Betaproteobacteria    | Cupriavidus basilensis         | DUF4365 domain-containing protein [Cupriavidus basilensis].       | GCF_000832305.1 |
| WP_082573822.1 | HTH+PNPase+TPR+GreAB-C+PIN*→                              | HTH+PNPase+TPR+GreAB-C+PIN | 1517 | -        | Actinobacteria        | Cellulomonas sp. Root137       | hypothetical protein [Cellulomonas sp. Root137].                  | GCF_001426725.1 |

| acc            | operon                                           | architecture              | len  | gen.name | taxend              | species                      | define                                                                          | gca             |
|----------------|--------------------------------------------------|---------------------------|------|----------|---------------------|------------------------------|---------------------------------------------------------------------------------|-----------------|
| WP_082991752.1 | REase+TPR+GreAB-C+PIN*→                          | REase+TPR+GreAB-C+PIN     | 1320 | -        | Betaproteobacteria  | Paraburkholderia tropica     | DUF4365 domain-containing protein [Paraburkholderia tropica].                   | GCF_001673675.1 |
| WP_083024260.1 | TPR+GreAB-C*→                                    | TPR+GreAB-C               | 833  | -        | Gammaproteobacteria | Halomonas lionensis          | hypothetical protein [Halomonas lionensis].                                     | GCF_002087295.1 |
| WP_083366146.1 | HetE-N1→ TPR+GreAB-C+PIN*→                       | TPR+GreAB-C+PIN           | 1112 | -        | Gammaproteobacteria | Pseudomonas koreensis        | hypothetical protein [Pseudomonas koreensis].                                   | GCF_014646955.1 |
| WP_083417785.1 | REase+TPR+GreAB-C+PIN*→   <-TIR                  | REase+TPR+GreAB-C+PIN     | 1329 | -        | Betaproteobacteria  | Burkholderia contaminans     | DUF4365 domain-containing protein [Burkholderia contaminans].                   | GCF_001865715.1 |
| WP_083925131.1 | TPR+GreAB-C+PIN*→                                | TPR+GreAB-C+PIN           | 1307 | -        | Gammaproteobacteria | Thioalkalivibrio sp. ALJ15   | GreA/GreB family elongation factor [Thioalkalivibrio sp. ALJ15].                | GCF_000383695.1 |
| WP_084371210.1 | X+PIN*→                                          | X+PIN                     | 1158 | -        | Bacteroidetes       | Reichenbachiella faecimaris  | hypothetical protein [Reichenbachiella faecimaris].                             | GCF_900176375.1 |
| WP_084886264.1 | TPR+GreAB-C+PIN*→                                | TPR+GreAB-C+PIN           | 999  | -        | Gammaproteobacteria | Pantoea septica              | hypothetical protein [Pantoea septica].                                         | GCF_002095575.1 |
| WP_085383443.1 | REase+TPR+GreAB-C+PIN*→                          | REase+TPR+GreAB-C+PIN     | 1301 | -        | Alphaproteobacteria | Bradyrhizobium canariense    | hypothetical protein [Bradyrhizobium canariense].                               | GCF_002108905.1 |
| WP_085905967.1 | TPR+GreAB-C+PIN*→                                | TPR+GreAB-C+PIN           | 1176 | -        | Alphaproteobacteria | Kiloniella majae             | hypothetical protein [Kiloniella majae].                                        | GCF_002118275.1 |
| WP_086630532.1 | HetE-N1→ TPR+GreAB-C+PIN+TM+TM*→                 | TPR+GreAB-C+PIN+TM+TM     | 1106 | -        | Gammaproteobacteria | Klebsiella aerogenes         | hypothetical protein [Klebsiella aerogenes].                                    | GCF_002152925.1 |
| WP_086759874.1 | APATPase+BetaPropeller→ PNPase+TPR+GreAB-C+PIN*→ | PNPase+TPR+GreAB-C+PIN    | 1399 | -        | Cyanobacteria       | Nostoc sp. 106C              | tetratricopeptide repeat protein [Nostoc sp. 106C].                             | GCF_002154725.1 |
| WP_086979350.1 | HetE-N1→ TPR+GreAB-C+PIN*→                       | TPR+GreAB-C+PIN           | 940  | -        | Gammaproteobacteria | Pseudomonas putida           | hypothetical protein [Pseudomonas putida].                                      | GCF_002157515.1 |
| WP_087258361.1 | TPR+GreAB-C+PIN*→                                | TPR+GreAB-C+PIN           | 1189 | -        | Firmicutes          | [Clostridium] spiroforme     | hypothetical protein [[Clostridium] spiroforme].                                | GCF_002160695.1 |
| WP_087391814.1 | TPR+GreAB-C+PIN*→                                | TPR+GreAB-C+PIN           | 1189 | -        | Firmicutes          | [Clostridium] spiroforme     | hypothetical protein [[Clostridium] spiroforme].                                | GCF_002160645.1 |
| WP_088070184.1 | TPR+PIN*→                                        | TPR+PIN                   | 1157 | -        | Firmicutes          | Bacillus thuringiensis       | hypothetical protein [Bacillus thuringiensis].                                  | GCF_002148155.1 |
| WP_088082523.1 | TPR+PIN*→                                        | TPR+PIN                   | 1179 | -        | Firmicutes          | Bacillus thuringiensis       | hypothetical protein [Bacillus thuringiensis].                                  | GCF_002147935.1 |
| WP_088087080.1 | TPR+PIN*→                                        | TPR+PIN                   | 1176 | -        | Firmicutes          | Bacillus sp. OV166           | hypothetical protein [Bacillus sp. OV166].                                      | GCF_900177675.1 |
| WP_088476259.1 | REase+TPR+GreAB-C+PIN*→                          | REase+TPR+GreAB-C+PIN     | 1284 | -        | Gammaproteobacteria | Stenotrophomonas pavanii     | GreA/GreB family elongation factor [Stenotrophomonas pavanii].                  | GCF_002205885.1 |
| WP_089172847.1 | BirA-HTH→ HEPN→ REase+TPR+TPR+GreAB-C+PIN*→      | REase+TPR+TPR+GreAB-C+PIN | 1332 | -        | Alphaproteobacteria | unclassified Bosea           | MULTISPECIES: hypothetical protein [unclassified Bosea].                        | GCF_002220095.1 |
| WP_090371407.1 | REase→ TPR+GreAB-C+PIN*→                         | TPR+GreAB-C+PIN           | 1155 | -        | Betaproteobacteria  | Nitrosospira sp. N15         | hypothetical protein [Nitrosospira sp. N15].                                    | GCF_900102495.1 |
| WP_090455730.1 | HetE-N1→ TPR+GreAB-C+PIN*→   <-TIR               | TPR+GreAB-C+PIN           | 1112 | -        | Gammaproteobacteria | Pseudomonas jessenii         | hypothetical protein [Pseudomonas jessenii].                                    | GCF_900104905.1 |
| WP_090543864.1 | TIR+TPR+GreAB-C+PIN*→                            | TIR+TPR+GreAB-C+PIN       | 1348 | -        | Betaproteobacteria  | Nitrosomonas sp. Nm132       | toll/interleukin-1 receptor domain-containing protein [Nitrosomonas sp. Nm132]. | GCF_900100485.1 |
| WP_090721286.1 | <-Cas_Cas1<-?  ?→?→?→?→ REase+TPR+GreAB-C+PIN*→  | REase+TPR+GreAB-C+PIN     | 1380 | -        | Betaproteobacteria  | Nitrosomonas sp. Nm166       | hypothetical protein [Nitrosomonas sp. Nm166].                                  | GCF_900112825.1 |
| WP_091343709.1 | HetE-N1→ TPR+GreAB-C+PIN*→                       | TPR+GreAB-C+PIN           | 1098 | -        | Gammaproteobacteria | Alkalimonas amylyolytica     | hypothetical protein [Alkalimonas amylyolytica].                                | GCF_900107845.1 |
| WP_091456057.1 | REase+TPR+GreAB-C+PIN*→                          | REase+TPR+GreAB-C+PIN     | 1259 | -        | Actinobacteria      | Micromonospora inyonensis    | hypothetical protein [Micromonospora inyonensis].                               | GCF_900091415.1 |
| WP_091965577.1 | TPR+GreAB-C+PIN*→                                | TPR+GreAB-C+PIN           | 1229 | -        | Alphaproteobacteria | Bradyrhizobium shewense      | hypothetical protein [Bradyrhizobium shewense].                                 | GCF_900094605.1 |
| WP_092226352.1 | TPR+GreAB-C+PIN*→                                | TPR+GreAB-C+PIN           | 1306 | -        | Alphaproteobacteria | Bradyrhizobium sp. Gha       | tetratricopeptide repeat protein [Bradyrhizobium sp. Gha].                      | GCF_900113735.1 |
| WP_092234200.1 | REase+TPR+GreAB-C+PIN*→                          | REase+TPR+GreAB-C+PIN     | 1321 | -        | Gammaproteobacteria | Pseudomonas proteolytica     | DUF4365 domain-containing protein [Pseudomonas proteolytica].                   | GCF_900105955.1 |
| WP_092689872.1 | HTH→ HetE-N1→ TPR+GreAB-C+PIN*→                  | TPR+GreAB-C+PIN           | 1077 | -        | Gammaproteobacteria | Acinetobacter kyonggiensis   | hypothetical protein [Acinetobacter kyonggiensis].                              | GCF_900107285.1 |
| WP_093257662.1 | HetE-N1→ HetE-N1+TPR+GreAB-C+PIN*→               | HetE-N1+TPR+GreAB-C+PIN   | 1120 | -        | Gammaproteobacteria | Pseudomonas                  | MULTISPECIES: hypothetical protein [Pseudomonas].                               | GCF_900110545.1 |
| WP_093289087.1 | REase+TPR+GreAB-C+PIN*→                          | REase+TPR+GreAB-C+PIN     | 1291 | -        | Gammaproteobacteria | Pseudoxanthomonas sp. CF125  | hypothetical protein [Pseudoxanthomonas sp. CF125].                             | GCF_900104085.1 |
| WP_095032727.1 | HetE-N1→ TPR+GreAB-C+PIN*→                       | TPR+GreAB-C+PIN           | 1104 | -        | Gammaproteobacteria | Klebsiella quasivariicola    | hypothetical protein [Klebsiella quasivariicola].                               | GCF_002269255.1 |
| WP_095064594.1 | HetE-N1→ TPR+GreAB-C+PIN*→                       | TPR+GreAB-C+PIN           | 1105 | -        | Gammaproteobacteria | Pseudomonas sp. Irchel s3f19 | hypothetical protein [Pseudomonas sp. Irchel s3f19].                            | GCF_900187555.1 |
| WP_095490577.1 | HetE-N1→ HetE-N1+TPR+GreAB-C+PIN*→               | HetE-N1+TPR+GreAB-C+PIN   | 1088 | -        | Gammaproteobacteria | Vibrio cholerae              | hypothetical protein [Vibrio cholerae].                                         | GCF_002284425.1 |
| WP_095570744.1 | HetE-N1→ TPR+GreAB-C+PIN*→                       | TPR+GreAB-C+PIN           | 1086 | -        | Gammaproteobacteria | Vibrio coralliilyticus       | hypothetical protein [Vibrio coralliilyticus].                                  | GCF_002286405.1 |
| WP_095743432.1 | REase+TPR+GreAB-C+PIN*→                          | REase+TPR+GreAB-C+PIN     | 1300 | -        | Betaproteobacteria  | Variovorax boronicumulans    | hypothetical protein [Variovorax boronicumulans].                               | GCF_002291405.1 |
| WP_096138380.1 | REase+TPR+GreAB-C+PIN*→                          | REase+TPR+GreAB-C+PIN     | 1321 | -        | Gammaproteobacteria | Pseudomonas syringae         | DUF4365 domain-containing protein [Pseudomonas syringae].                       | GCF_002318715.1 |
| WP_096145332.1 | PIN*→                                            | PIN                       | 1088 | -        | Firmicutes          | Clostridium chauvoei         | tetratricopeptide repeat protein [Clostridium chauvoei].                        | GCF_002327185.1 |
| WP_096360261.1 | REase+TPR+GreAB-C+PIN*→                          | REase+TPR+GreAB-C+PIN     | 2100 | -        | Gammaproteobacteria | Sulfuricaulis limicola       | hypothetical protein [Sulfuricaulis limicola].                                  | GCF_002355735.1 |

| acc            | operon                                 | architecture            | len  | gen.name | taxend              | species                      | define                                                           | gca             |
|----------------|----------------------------------------|-------------------------|------|----------|---------------------|------------------------------|------------------------------------------------------------------|-----------------|
| WP_096444074.1 | HetE-N1→ TPR+GreAB-C+PIN*→             | TPR+GreAB-C+PIN         | 1088 | -        | Gammaproteobacteria | Vibrio mediterranei          | hypothetical protein [Vibrio mediterranei].                      | GCF_002995655.1 |
| WP_096819326.1 | REase+TPR+GreAB-C+PIN*→                | REase+TPR+GreAB-C+PIN   | 1424 | -        | Gammaproteobacteria | Pseudomonas fluorescens      | tetratricopeptide repeat protein [Pseudomonas fluorescens].      | GCF_002417665.1 |
| WP_096985931.1 | HetE-N1→ TPR+GreAB-C+PIN*→             | TPR+GreAB-C+PIN         | 1094 | -        | Gammaproteobacteria | Escherichia coli             | hypothetical protein [Escherichia coli].                         | GCF_013372365.1 |
| WP_097373330.1 | PIN*→                                  | PIN                     | 245  | -        | Alphaproteobacteria | Celeribacter manganoxidans   | hypothetical protein [Celeribacter manganoxidans].               | GCF_002504165.1 |
| WP_097730210.1 | HetE-N1→ TPR+GreAB-C+PIN*→             | TPR+GreAB-C+PIN         | 1094 | -        | Gammaproteobacteria | Escherichia coli             | hypothetical protein [Escherichia coli].                         | GCF_002535535.1 |
| WP_097759664.1 | HetE-N1→ TPR+GreAB-C+PIN*→             | TPR+GreAB-C+PIN         | 1094 | -        | Gammaproteobacteria | Escherichia coli             | hypothetical protein [Escherichia coli].                         | GCF_002538945.1 |
| WP_097979402.1 | TPR+PIN*→                              | TPR+PIN                 | 1217 | -        | Firmicutes          | Bacillus toyonensis          | hypothetical protein [Bacillus toyonensis].                      | GCF_002552775.1 |
| WP_098090392.1 | HetE-N1→ TPR+GreAB-C+PIN*→             | TPR+GreAB-C+PIN         | 1101 | -        | Gammaproteobacteria | Pseudomonas putida           | hypothetical protein [Pseudomonas putida].                       | GCF_002554535.1 |
| WP_098280847.1 | TPR+PIN*→                              | TPR+PIN                 | 1183 | -        | Firmicutes          | Bacillus cereus              | hypothetical protein [Bacillus cereus].                          | GCF_002560075.1 |
| WP_098365372.1 | TPR+PIN*→                              | TPR+PIN                 | 1217 | -        | Firmicutes          | Bacillus cereus              | hypothetical protein [Bacillus cereus].                          | GCF_002561575.1 |
| WP_098420086.1 | TPR+PIN*→                              | TPR+PIN                 | 1183 | -        | Firmicutes          | Bacillus cereus              | hypothetical protein [Bacillus cereus].                          | GCF_002562505.1 |
| WP_098433845.1 | TPR+PIN*→                              | TPR+PIN                 | 1184 | -        | Firmicutes          | Priestia megaterium          | hypothetical protein [Priestia megaterium].                      | GCF_002564705.1 |
| WP_098573825.1 | TPR+GreAB-C+PIN*→                      | TPR+GreAB-C+PIN         | 1147 | -        | Firmicutes          | Bacillus wiedmannii          | tetratricopeptide repeat protein [Bacillus wiedmannii].          | GCF_002568785.1 |
| WP_098687609.1 | TPR+PIN*→                              | TPR+PIN                 | 1157 | -        | Firmicutes          | Bacillus toyonensis          | hypothetical protein [Bacillus toyonensis].                      | GCF_002571615.1 |
| WP_099262235.1 | REase+TPR+GreAB-C+PIN*→                | REase+TPR+GreAB-C+PIN   | 1243 | -        | Planctomycetes      | Rhodopirellula bahusiensis   | GreA/GreB family elongation factor [Rhodopirellula bahusiensis]. | GCF_002727185.1 |
| WP_099438436.1 | TPR+GreAB-C+PIN*→                      | TPR+GreAB-C+PIN         | 1252 | -        | Bacteroidetes       | Pedobacter ginsengisoli      | hypothetical protein [Pedobacter ginsengisoli].                  | GCF_002736205.1 |
| WP_100140263.1 | HetE-N1→ TPR+GreAB-C+PIN*→             | TPR+GreAB-C+PIN         | 1066 | -        | Betaproteobacteria  | Snodgrassella alvi           | hypothetical protein [Snodgrassella alvi].                       | GCF_002777775.1 |
| WP_100151648.1 | HetE-N1→ TPR+GreAB-C+PIN*→             | TPR+GreAB-C+PIN         | 1066 | -        | Betaproteobacteria  | Snodgrassella alvi           | hypothetical protein [Snodgrassella alvi].                       | GCF_002777655.1 |
| WP_100344325.1 | REase+TPR+GreAB-C+PIN*→                | REase+TPR+GreAB-C+PIN   | 1215 | -        | Actinobacteria      | Compostimonas suwonensis     | DUF4365 domain-containing protein [Compostimonas suwonensis].    | GCF_002797855.1 |
| WP_100632757.1 | REase+TPR+GreAB-C+PIN*→                | REase+TPR+GreAB-C+PIN   | 1321 | -        | Gammaproteobacteria | Pseudomonas qingdaonensis    | DUF4365 domain-containing protein [Pseudomonas qingdaonensis].   | GCF_002806685.1 |
| WP_101291505.1 | HetE-N1→ TPR+GreAB-C+PIN*→             | TPR+GreAB-C+PIN         | 1094 | -        | Gammaproteobacteria | Escherichia coli             | hypothetical protein [Escherichia coli].                         | GCF_002843705.1 |
| WP_102155042.1 | REase+TPR+GreAB-C+PIN*→                | REase+TPR+GreAB-C+PIN   | 1270 | -        | Alphaproteobacteria | Tsuneonella flava            | GreA/GreB family elongation factor [Tsuneonella flava].          | GCF_002870965.1 |
| WP_102488850.1 | HetE-N1→ HetE-N1+TPR+GreAB-C+PIN*→     | HetE-N1+TPR+GreAB-C+PIN | 1088 | -        | Gammaproteobacteria | Vibrio splendidus            | hypothetical protein [Vibrio splendidus].                        | GCF_002875305.1 |
| WP_102520861.1 | HetE-N1→ TPR+GreAB-C+PIN*→             | TPR+GreAB-C+PIN         | 1088 | -        | Gammaproteobacteria | Shewanella sp. 10N.286.48.A6 | hypothetical protein [Shewanella sp. 10N.286.48.A6].             | GCF_002873135.1 |
| WP_102570991.1 | HetE-N1→ TPR+GreAB-C+PIN*→             | TPR+GreAB-C+PIN         | 1088 | -        | Gammaproteobacteria | Vibrio splendidus            | hypothetical protein [Vibrio splendidus].                        | GCF_002875585.1 |
| WP_102574526.1 | HetE-N1→ TPR+GreAB-C+PIN*→             | TPR+GreAB-C+PIN         | 1116 | -        | Gammaproteobacteria | Vibrio splendidus            | hypothetical protein [Vibrio splendidus].                        | GCF_002877195.1 |
| WP_102576920.1 | HetE-N1→ HetE-N1+TPR+GreAB-C+PIN*→     | HetE-N1+TPR+GreAB-C+PIN | 1091 | -        | Gammaproteobacteria | Vibrio splendidus            | hypothetical protein [Vibrio splendidus].                        | GCF_002877345.1 |
| WP_103206664.1 | TPR+GreAB-C+PIN*→                      | TPR+GreAB-C+PIN         | 1213 | -        | Actinobacteria      | Microbacterium testaceum     | hypothetical protein [Microbacterium testaceum].                 | GCF_002899925.1 |
| WP_103448257.1 | REase+TPR+GreAB-C+PIN*→                | REase+TPR+GreAB-C+PIN   | 1421 | -        | Gammaproteobacteria | Pseudomonas                  | MULTISPECIES: hypothetical protein [Pseudomonas].                | GCF_015680835.1 |
| WP_103712798.1 | REase+TPR+GreAB-C+PIN*→   <-KAP_NTPase | REase+TPR+GreAB-C+PIN   | 1321 | -        | Gammaproteobacteria | Pseudomonas syringae         | DUF4365 domain-containing protein [Pseudomonas syringae].        | GCF_002916275.1 |
| WP_103713374.1 | HetE-N1→ TPR+GreAB-C+PIN*→             | TPR+GreAB-C+PIN         | 1107 | -        | Gammaproteobacteria | Pseudomonas syringae         | hypothetical protein [Pseudomonas syringae].                     | GCF_002917155.1 |
| WP_103715293.1 | TPR+GreAB-C+PIN*→                      | TPR+GreAB-C+PIN         | 1131 | -        | Bacteroidetes       | Flavobacterium columnare     | hypothetical protein [Flavobacterium columnare].                 | GCF_002916795.1 |
| WP_103949560.1 | HetE-N1→ HetE-N1+TPR+GreAB-C+PIN*→     | HetE-N1+TPR+GreAB-C+PIN | 1094 | -        | Gammaproteobacteria | Lelliottia                   | MULTISPECIES: hypothetical protein [Lelliottia].                 | GCF_002922995.1 |
| WP_104189366.1 | HetE-N1→ TPR+GreAB-C+PIN*→             | TPR+GreAB-C+PIN         | 1110 | -        | Gammaproteobacteria | unclassified Pantoea         | MULTISPECIES: hypothetical protein [unclassified Pantoea].       | GCF_002928355.1 |
| WP_104723186.1 | REase+TPR+GreAB-C+PIN*→                | REase+TPR+GreAB-C+PIN   | 1321 | -        | Gammaproteobacteria | Pseudomonas syringae         | DUF4365 domain-containing protein [Pseudomonas syringae].        | GCF_900235865.1 |
| WP_104925436.1 | HetE-N1→ TPR+GreAB-C+PIN*→             | TPR+GreAB-C+PIN         | 1118 | -        | Gammaproteobacteria | Rahnella sp. ERMR1:05        | hypothetical protein [Rahnella sp. ERMR1:05].                    | GCF_002951615.1 |
| WP_105080712.1 | HetE-N1→ TPR+GreAB-C+PIN*→             | TPR+GreAB-C+PIN         | 1111 | -        | Gammaproteobacteria | Pantoea                      | MULTISPECIES: hypothetical protein [Pantoea].                    | GCF_017920435.1 |
| WP_105696567.1 | REase+TPR+GreAB-C+PIN*→                | REase+TPR+GreAB-C+PIN   | 1321 | -        | Gammaproteobacteria | Pseudomonas poae             | DUF4365 domain-containing protein [Pseudomonas poae].            | GCF_002980135.1 |
| WP_105730942.1 | REase+TPR+GreAB-C+PIN*→                | REase+TPR+GreAB-C+PIN   | 1344 | -        | Betaproteobacteria  | Malikia spinosa              | hypothetical protein [Malikia spinosa].                          | GCF_002980625.1 |
| WP_105731559.1 | REase+TPR+GreAB-C+PIN*→                | REase+TPR+GreAB-C+PIN   | 1278 | -        | Alphaproteobacteria | Ochrobactrum sp. MYb29       | hypothetical protein [Ochrobactrum sp. MYb29].                   | GCF_002979345.1 |

| acc            | operon                                            | architecture               | len  | gen.name | taxend                | species                           | define                                                             | gca             |
|----------------|---------------------------------------------------|----------------------------|------|----------|-----------------------|-----------------------------------|--------------------------------------------------------------------|-----------------|
| WP_105794455.1 | REase+TPR+GreAB-C+PIN*→                           | REase+TPR+GreAB-C+PIN      | 1351 | -        | Betaproteobacteria    | Burkholderia multivorans          | hypothetical protein [Burkholderia multivorans].                   | GCF_002981485.1 |
| WP_106098487.1 | SIG+TM→ TPR+GreAB-C+PIN*→                         | TPR+GreAB-C+PIN            | 1129 | -        | Bacteroidetes         | Capnocytophaga sp. oral taxon 878 | hypothetical protein [Capnocytophaga sp. oral taxon 878].          | GCF_002999135.1 |
| WP_106374900.1 | HetE-N1→ TPR+GreAB-C+PIN*→                        | TPR+GreAB-C+PIN            | 1145 | -        | Gammaproteobacteria   | Halomonas songnenensis            | hypothetical protein [Halomonas songnenensis].                     | GCF_003002925.1 |
| WP_106946809.1 | TPR+GreAB-C+PIN*→                                 | TPR+GreAB-C+PIN            | 1155 | -        | Alphaproteobacteria   | Bradyrhizobium sp. MOS002         | hypothetical protein [Bradyrhizobium sp. MOS002].                  | GCF_003020115.1 |
| WP_107027340.1 | REase+TPR+TPR+GreAB-C+PIN*→                       | REase+TPR+TPR+GreAB-C+PIN  | 1357 | -        | Alphaproteobacteria   | Ensifer sp. NM-2                  | hypothetical protein [Ensifer sp. NM-2].                           | GCF_003024455.1 |
| WP_107248740.1 | HetE-N1→ GreAB-C*→                                | GreAB-C                    | 1128 | -        | Gammaproteobacteria   | Photobacterium kishitanii         | hypothetical protein [Photobacterium kishitanii].                  | GCF_003025535.1 |
| WP_107289369.1 | HetE-N1→ GreAB-C*→                                | GreAB-C                    | 1164 | -        | Gammaproteobacteria   | Photobacterium kishitanii         | hypothetical protein [Photobacterium kishitanii].                  | GCF_003025915.1 |
| WP_107901223.1 | TPR+PIN*→                                         | TPR+PIN                    | 1216 | -        | Firmicutes            | Bacillus sp. OV186                | hypothetical protein [Bacillus sp. OV186].                         | GCF_003053645.1 |
| WP_108393929.1 | HetE-N1→ TPR+GreAB-C+PIN*→                        | TPR+GreAB-C+PIN            | 1106 | -        | Gammaproteobacteria   | Enterobacter hormaechei           | hypothetical protein [Enterobacter hormaechei].                    | GCF_003056805.1 |
| WP_108462916.1 | REase+TPR+TPR+GreAB-C+PIN*→                       | REase+TPR+TPR+GreAB-C+PIN  | 1323 | -        | Alphaproteobacteria   | Devosia naphthalenivorans         | GreA/GreB family elongation factor [Devosia naphthalenivorans].    | GCF_003056355.1 |
| WP_108677990.1 | HetE-N1→ HetE-N1+TPR+GreAB-C+PIN*→                | HetE-N1+TPR+GreAB-C+PIN    | 1088 | -        | Gammaproteobacteria   | Vibrio vulnificus                 | hypothetical protein [Vibrio vulnificus].                          | GCF_011754395.1 |
| WP_108816955.1 | REase+TPR+GreAB-C+PIN*→                           | REase+TPR+GreAB-C+PIN      | 1311 | -        | Alphaproteobacteria   | Loktanella sp. Alg231-35          | hypothetical protein [Loktanella sp. Alg231-35].                   | GCF_900143545.1 |
| WP_109158749.1 | X+PIN*→                                           | X+PIN                      | 1041 | -        | Epsilonproteobacteria | Aliarcobacter skirrowii           | hypothetical protein [Aliarcobacter skirrowii].                    | GCF_003122145.1 |
| WP_109211325.1 | REase+TPR+GreAB-C+PIN*→                           | REase+TPR+GreAB-C+PIN      | 1211 | -        | Actinobacteria        | Microbacterium                    | MULTISPECIES: DUF4365 domain-containing protein [Microbacterium].  | GCF_015278315.1 |
| WP_109426752.1 | TPR→ TPR+GreAB-C+PIN*→   <-?  HTH→                | TPR+GreAB-C+PIN            | 494  | -        | Gammaproteobacteria   | Acinetobacter baumannii           | GreA/GreB family elongation factor [Acinetobacter baumannii].      | GCF_013416255.1 |
| WP_109802449.1 | TPR+PIN*→                                         | TPR+PIN                    | 1203 | -        | Actinobacteria        | Micromonospora sp. 4G51           | hypothetical protein [Micromonospora sp. 4G51].                    | GCF_003172935.1 |
| WP_109937286.1 | HetE-N1→ HetE-N1+TPR+GreAB-C+PIN*→                | HetE-N1+TPR+GreAB-C+PIN    | 1123 | -        | Gammaproteobacteria   | Pseudomonas sp. RW407             | hypothetical protein [Pseudomonas sp. RW407].                      | GCF_003176655.1 |
| WP_109950172.1 | REase+TPR+GreAB-C+PIN*→                           | REase+TPR+GreAB-C+PIN      | 1332 | -        | -                     | Methylobacterium sp. 17Sr1-43     | hypothetical protein [Methylobacterium sp. 17Sr1-43].              | GCF_003173735.1 |
| WP_109967732.1 | PNPase+TPR+GreAB-C+PIN*→                          | PNPase+TPR+GreAB-C+PIN     | 1415 | -        | Euryarchaeota         | Methanospirillum lacunae          | hypothetical protein [Methanospirillum lacunae].                   | GCF_003173355.1 |
| WP_110317339.1 | HTH+PNPase+TPR+GreAB-C+PIN*→                      | HTH+PNPase+TPR+GreAB-C+PIN | 1518 | -        | Actinobacteria        | Mycolicibacterium moriokaense     | hypothetical protein [Mycolicibacterium moriokaense].              | GCF_003201655.1 |
| WP_110434863.1 | HetE-N1→ TPR+GreAB-C+PIN*→                        | TPR+GreAB-C+PIN            | 950  | -        | Gammaproteobacteria   | Gilliamella apicola               | hypothetical protein [Gilliamella apicola].                        | GCF_003202655.1 |
| WP_110455267.1 | HetE-N1→ TPR+GreAB-C+PIN*→                        | TPR+GreAB-C+PIN            | 1126 | -        | Gammaproteobacteria   | Gilliamella apicola               | hypothetical protein [Gilliamella apicola].                        | GCF_003202815.1 |
| WP_110459582.1 | HetE-N1→ HetE-N1+TPR+GreAB-C+PIN*→                | HetE-N1+TPR+GreAB-C+PIN    | 1107 | -        | Gammaproteobacteria   | Pseudomonas syringae              | hypothetical protein [Pseudomonas syringae].                       | GCF_003202975.1 |
| WP_110575159.1 | HetE-N1→ HetE-N1+TPR+GreAB-C+PIN*→?→ MACRODOMAIN→ | HetE-N1+TPR+GreAB-C+PIN    | 1099 | -        | Gammaproteobacteria   | Marinomonas alcarazii             | hypothetical protein [Marinomonas alcarazii].                      | GCF_003208215.1 |
| WP_110766563.1 | REase+TPR+GreAB-C+PIN*→   <-KAP_NTPase            | REase+TPR+GreAB-C+PIN      | 1321 | -        | Gammaproteobacteria   | Pseudomonas syringae              | DUF4365 domain-containing protein [Pseudomonas syringae].          | GCF_003205895.1 |
| WP_110818130.1 | TPR+GreAB-C+PIN*→                                 | TPR+GreAB-C+PIN            | 1140 | -        | Gammaproteobacteria   | Pseudomonas syringae              | hypothetical protein [Pseudomonas syringae].                       | GCF_003205965.1 |
| WP_111087282.1 | REase+TPR+GreAB-C+PIN*→                           | REase+TPR+GreAB-C+PIN      | 1208 | -        | Actinobacteria        | Curtobacterium sp. MCLR17_055     | DUF4365 domain-containing protein [Curtobacterium sp. MCLR17_055]. | GCF_003234305.1 |
| WP_112353670.1 | TPR+GreAB-C+PIN*→                                 | TPR+GreAB-C+PIN            | 1235 | -        | Gammaproteobacteria   | Shewanella benthica               | hypothetical protein [Shewanella benthica].                        | GCF_900476435.1 |
| WP_112921055.1 | HNH→?→?→ PSE→ TPR+GreAB-C+PIN*→                   | TPR+GreAB-C+PIN            | 1092 | -        | Gammaproteobacteria   | Escherichia coli                  | hypothetical protein [Escherichia coli].                           | GCF_003292515.1 |
| WP_114150230.1 | TPR+GreAB-C+PIN*→?→?   <-?  ?→ PAIREDC-HTH→       | TPR+GreAB-C+PIN            | 900  | -        | Gammaproteobacteria   | Acinetobacter baumannii           | GreA/GreB family elongation factor [Acinetobacter baumannii].      | GCF_017726575.1 |
| WP_114915524.1 | TPR+PIN*→                                         | TPR+PIN                    | 1187 | -        | Firmicutes            | Oceanobacillus zhaokaii           | hypothetical protein [Oceanobacillus zhaokaii].                    | GCF_003352005.1 |
| WP_115015610.1 | HetE-N1→ TPR+GreAB-C+PIN*→                        | TPR+GreAB-C+PIN            | 1087 | -        | Gammaproteobacteria   | Shewanella putrefaciens           | hypothetical protein [Shewanella putrefaciens].                    | GCF_900457065.1 |
| WP_115596495.1 | TPR+GreAB-C+PIN*→?→?   <-?  ?→ PAIREDC-HTH→       | TPR+GreAB-C+PIN            | 756  | -        | Gammaproteobacteria   | Acinetobacter baumannii           | GreA/GreB family elongation factor [Acinetobacter baumannii].      | GCF_900444745.1 |
| WP_116227219.1 | HetE-N1→ TPR+GreAB-C+PIN*→                        | TPR+GreAB-C+PIN            | 1121 | -        | Gammaproteobacteria   | Pectobacterium aquaticum          | hypothetical protein [Pectobacterium aquaticum].                   | GCF_003382595.2 |
| WP_116600438.1 | REase+TPR+GreAB-C+PIN*→                           | REase+TPR+GreAB-C+PIN      | 1438 | -        | Gammaproteobacteria   | Pseudomonas sp. HMWF011           | hypothetical protein [Pseudomonas sp. HMWF011].                    | GCF_003094675.1 |
| WP_116893902.1 | TPR+GreAB-C+PIN*→                                 | TPR+GreAB-C+PIN            | 1158 | -        | Gammaproteobacteria   | Pseudomonas syringae              | hypothetical protein [Pseudomonas syringae].                       | GCF_003412595.1 |
| WP_116994473.1 | REase+TPR+GreAB-C+PIN*→                           | REase+TPR+GreAB-C+PIN      | 1327 | -        | Betaproteobacteria    | Duganella sp. BJB476              | hypothetical protein [Duganella sp. BJB476].                       | GCF_003416895.1 |
| WP_117157406.1 | HetE-N1→ TPR+GreAB-C+PIN*→                        | TPR+GreAB-C+PIN            | 1117 | -        | Gammaproteobacteria   | Enterobacteriaceae                | MULTISPECIES: hypothetical protein [Enterobacteriaceae].           | GCF_017814635.1 |
| WP_117181470.1 | REase+TPR+GreAB-C+PIN*→                           | REase+TPR+GreAB-C+PIN      | 1438 | -        | Gammaproteobacteria   | Pseudomonas cichorii              | hypothetical protein [Pseudomonas cichorii].                       | GCF_003416755.1 |

| acc            | operon                                                    | architecture            | len  | gen.name | taxend                | species                                | define                                                                                     | gca             |
|----------------|-----------------------------------------------------------|-------------------------|------|----------|-----------------------|----------------------------------------|--------------------------------------------------------------------------------------------|-----------------|
| WP_117831329.1 | HEPN+SNF→?→?→?→ X+PIN*→                                   | X+PIN                   | 1212 | -        | Firmicutes            | Roseburia sp. TF10-5                   | hypothetical protein [Roseburia sp. TF10-5].                                               | GCF_003462365.1 |
| WP_118235377.1 | X+PIN*→                                                   | X+PIN                   | 1200 | -        | Firmicutes            | Blautia obeum                          | hypothetical protein [Blautia obeum].                                                      | GCF_003470555.1 |
| WP_118282562.1 | X+PIN*→?→ CITB-HTH+LexA-protease→                         | X+PIN                   | 1212 | -        | Firmicutes            | Roseburia sp. AM16-25                  | hypothetical protein [Roseburia sp. AM16-25].                                              | GCF_003473825.1 |
| WP_118371145.1 | X+PIN*→                                                   | X+PIN                   | 1200 | -        | Firmicutes            | Lachnospira eligens                    | hypothetical protein [Lachnospira eligens].                                                | GCF_003474735.1 |
| WP_118468213.1 | Mbetalac→ Trypsin+TPR+PIN*→                               | Trypsin+TPR+PIN         | 1933 | -        | Firmicutes            | unclassified Clostridium               | MULTISPECIES: trypsin-like peptidase domain-containing protein [unclassified Clostridium]. | GCF_003477925.1 |
| WP_118891177.1 | REase+TPR+GreAB-C+PIN*→                                   | REase+TPR+GreAB-C+PIN   | 1327 | -        | Betaproteobacteria    | Ralstonia solanacearum                 | DUF4365 domain-containing protein [Ralstonia solanacearum].                                | GCF_003515285.1 |
| WP_118897359.1 | X+PIN*→                                                   | X+PIN                   | 1033 | -        | Epsilonproteobacteria | Malaciobacter marinus                  | hypothetical protein [Malaciobacter marinus].                                              | GCF_003544855.1 |
| WP_118994196.1 | HetE-N1→ HetE-N1+TPR+GreAB-C+PIN*→                        | HetE-N1+TPR+GreAB-C+PIN | 1104 | -        | Betaproteobacteria    | Pusillimonas                           | MULTISPECIES: hypothetical protein [Pusillimonas].                                         | GCF_004022565.1 |
| WP_119088708.1 | REase+TPR+GreAB-C+PIN*→                                   | REase+TPR+GreAB-C+PIN   | 1271 | -        | Bacteria              | Candidatus Cryosericum terrychapinii   | hypothetical protein [Candidatus Cryosericum terrychapinii].                               | GCF_003570925.1 |
| WP_119196537.1 | X+PIN*→ HTH→?→?→ HTH→                                     | X+PIN                   | 1109 | -        | Firmicutes            | Dorea formicigenerans                  | hypothetical protein [Dorea formicigenerans].                                              | GCF_003465045.1 |
| WP_119369914.1 | REase+TPR+GreAB-C+PIN*→   <-?<-TPR                        | REase+TPR+GreAB-C+PIN   | 1436 | -        | Gammaproteobacteria   | Pseudomonas monteilii                  | GreA/GreB family elongation factor [Pseudomonas monteilii].                                | GCF_003576045.1 |
| WP_119587627.1 | REase+TPR+GreAB-C+PIN*→                                   | REase+TPR+GreAB-C+PIN   | 1290 | -        | Alphaproteobacteria   | Aurantiacibacter zhengii               | hypothetical protein [Aurantiacibacter zhengii].                                           | GCF_003584125.1 |
| WP_119956833.1 | REase+TPR+GreAB-C+PIN*→                                   | REase+TPR+GreAB-C+PIN   | 1511 | -        | Gammaproteobacteria   | Pseudomonas sp. K1S02-6                | tetratricopeptide repeat protein [Pseudomonas sp. K1S02-6].                                | GCF_003596405.1 |
| WP_119992948.1 | TM+TM+TPR+PIN*→                                           | TM+TM+TPR+PIN           | 1208 | -        | Bacteroidetes         | Bacteroides sp. AM41-16                | hypothetical protein [Bacteroides sp. AM41-16].                                            | GCF_003603495.1 |
| WP_120172805.1 | TM+TM+TPR+PIN*→                                           | TM+TM+TPR+PIN           | 1208 | -        | Bacteroidetes         | Bacteroides sp. AF20-13LB              | hypothetical protein [Bacteroides sp. AF20-13LB].                                          | GCF_003603065.1 |
| WP_120777109.1 | TPR+GreAB-C+PIN*→                                         | TPR+GreAB-C+PIN         | 1192 | -        | Actinobacteria        | Microbacterium sp. CGR2                | hypothetical protein [Microbacterium sp. CGR2].                                            | GCF_003626735.1 |
| WP_121482750.1 | REase+TPR+GreAB-C+PIN*→                                   | REase+TPR+GreAB-C+PIN   | 1233 | -        | Alphaproteobacteria   | Brevundimonas naejangsanensis          | hypothetical protein [Brevundimonas naejangsanensis].                                      | GCF_003627995.1 |
| WP_122071999.1 | PAIREDC-HTH→?→?→?→ GreAB-C+PIN*→                          | GreAB-C+PIN             | 683  | -        | Gammaproteobacteria   | Acinetobacter wuhouensis               | hypothetical protein [Acinetobacter wuhouensis].                                           | GCF_002165345.2 |
| WP_122252741.1 | TPR+GreAB-C+PIN*→                                         | TPR+GreAB-C+PIN         | 1158 | -        | Gammaproteobacteria   | Pseudomonas savastanoi                 | hypothetical protein [Pseudomonas savastanoi].                                             | GCF_003703035.1 |
| WP_122265719.1 | TPR+GreAB-C+PIN*→                                         | TPR+GreAB-C+PIN         | 1140 | -        | Gammaproteobacteria   | Pseudomonas syringae                   | hypothetical protein [Pseudomonas syringae].                                               | GCF_003700575.1 |
| WP_122311960.1 | TPR+GreAB-C+PIN*→                                         | TPR+GreAB-C+PIN         | 1143 | -        | Gammaproteobacteria   | Pseudomonas coronafaciens              | hypothetical protein [Pseudomonas coronafaciens].                                          | GCF_003699785.1 |
| WP_122314252.1 | REase+TPR+GreAB-C+PIN*→                                   | REase+TPR+GreAB-C+PIN   | 1436 | -        | Gammaproteobacteria   | Pseudomonas cichorii                   | hypothetical protein [Pseudomonas cichorii].                                               | GCF_003700275.1 |
| WP_122364448.1 | REase+TPR+GreAB-C+PIN*→                                   | REase+TPR+GreAB-C+PIN   | 1438 | -        | Gammaproteobacteria   | Pseudomonas                            | MULTISPECIES: hypothetical protein [Pseudomonas].                                          | GCF_014842015.1 |
| WP_122365799.1 | TPR+GreAB-C+PIN*→                                         | TPR+GreAB-C+PIN         | 1140 | -        | Gammaproteobacteria   | Pseudomonas syringae group genomosp. 3 | hypothetical protein [Pseudomonas syringae group genomosp. 3].                             | GCF_003702755.1 |
| WP_122471279.1 | HetE-N1→ TPR+GreAB-C+PIN*→                                | TPR+GreAB-C+PIN         | 1100 | -        | Gammaproteobacteria   | Pseudomonas viridiflava                | hypothetical protein [Pseudomonas viridiflava].                                            | GCF_900582365.1 |
| WP_122509345.1 | TPR+GreAB-C+PIN*→                                         | TPR+GreAB-C+PIN         | 1140 | -        | Gammaproteobacteria   | Pseudomonas viridiflava                | hypothetical protein [Pseudomonas viridiflava].                                            | GCF_900581635.1 |
| WP_122559800.1 | REase+TPR+GreAB-C+PIN*→                                   | REase+TPR+GreAB-C+PIN   | 1438 | -        | Gammaproteobacteria   | Pseudomonas viridiflava                | hypothetical protein [Pseudomonas viridiflava].                                            | GCF_900580935.1 |
| WP_122732542.1 | HetE-N1→ HetE-N1+TPR+GreAB-C+PIN*→                        | HetE-N1+TPR+GreAB-C+PIN | 1106 | -        | Gammaproteobacteria   | Pseudomonas viridiflava                | hypothetical protein [Pseudomonas viridiflava].                                            | GCF_900591195.1 |
| WP_122848883.1 | REase+TPR+GreAB-C+PIN*→                                   | REase+TPR+GreAB-C+PIN   | 1321 | -        | Gammaproteobacteria   | Pseudomonas viridiflava                | DUF4365 domain-containing protein [Pseudomonas viridiflava].                               | GCF_900585905.1 |
| WP_122887609.1 | REase+TPR+GreAB-C+PIN*→                                   | REase+TPR+GreAB-C+PIN   | 1345 | -        | Betaproteobacteria    | Burkholderia pseudomallei              | hypothetical protein [Burkholderia pseudomallei].                                          | GCF_900593895.1 |
| WP_123094036.1 | HetE-N1→ TPR+GreAB-C+PIN*→?→ MACRODOMAIN→                 | TPR+GreAB-C+PIN         | 1099 | -        | Gammaproteobacteria   | Marinomonas hwangdonensis              | hypothetical protein [Marinomonas hwangdonensis].                                          | GCF_003721245.1 |
| WP_123338621.1 | REase+TPR+GreAB-C+PIN*→                                   | REase+TPR+GreAB-C+PIN   | 1210 | -        | Actinobacteria        | Curtobacterium sp. PhB171              | DUF4365 domain-containing protein [Curtobacterium sp. PhB171].                             | GCF_003752665.1 |
| WP_123718714.1 | HetE-N1→ TPR+GreAB-C+PIN*→                                | TPR+GreAB-C+PIN         | 1112 | -        | Gammaproteobacteria   | Pseudomonas poae                       | hypothetical protein [Pseudomonas poae].                                                   | GCF_003731985.1 |
| WP_123788903.1 | REase+TPR+GreAB-C+PIN*→                                   | REase+TPR+GreAB-C+PIN   | 1351 | -        | Betaproteobacteria    | Burkholderia multivorans               | hypothetical protein [Burkholderia multivorans].                                           | GCF_003812365.1 |
| WP_123901658.1 | TPR+GreAB-C+PIN→ GreAB-C+PIN*→                            | GreAB-C+PIN             | 535  | -        | Bacteroidetes         | Chryseobacterium bernardetii           | hypothetical protein [Chryseobacterium bernardetii].                                       | GCF_003815955.1 |
| WP_124017047.1 | TPR+GreAB-C+PIN*→                                         | TPR+GreAB-C+PIN         | 838  | -        | Gammaproteobacteria   | Shewanella vesiculosa                  | hypothetical protein [Shewanella vesiculosa].                                              | GCF_003797885.1 |
| WP_124131211.1 | DOC+HTH→ REase+TOPC→?→ HetE-N1→ HetE-N1+TPR+GreAB-C+PIN*→ | HetE-N1+TPR+GreAB-C+PIN | 1124 | -        | Gammaproteobacteria   | Pseudomonas aeruginosa                 | hypothetical protein [Pseudomonas aeruginosa].                                             | GCF_003836815.1 |
| WP_124132190.1 | TPR+GreAB-C+PIN*→                                         | TPR+GreAB-C+PIN         | 1140 | -        | Gammaproteobacteria   | Pseudomonas aeruginosa                 | hypothetical protein [Pseudomonas aeruginosa].                                             | GCF_003836445.1 |



| acc            | operon                                                    | architecture                 | len  | gen.name | taxend              | species                                         | define                                                                         | gca             |
|----------------|-----------------------------------------------------------|------------------------------|------|----------|---------------------|-------------------------------------------------|--------------------------------------------------------------------------------|-----------------|
| WP_124135313.1 | TPR+GreAB-C+PIN*→                                         | TPR+GreAB-C+PIN              | 1158 | -        | Gammaproteobacteria | <i>Pseudomonas aeruginosa</i>                   | hypothetical protein [Pseudomonas aeruginosa].                                 | GCF_003836905.1 |
| WP_124172921.1 | DOC+HTH→ REase+TOPC→?→ HetE-N1→ HetE-N1+TPR+GreAB-C+PIN*→ | HetE-N1+TPR+GreAB-C+PIN      | 1124 | -        | Gammaproteobacteria | <i>Pseudomonas aeruginosa</i>                   | hypothetical protein [Pseudomonas aeruginosa].                                 | GCF_003839465.1 |
| WP_124325287.1 | TPR+GreAB-C+PIN*→                                         | TPR+GreAB-C+PIN              | 1139 | -        | Gammaproteobacteria | <i>Pseudomonas chlororaphis</i>                 | hypothetical protein [Pseudomonas chlororaphis].                               | GCF_003850385.1 |
| WP_124410055.1 | HetE-N1→ TPR+GreAB-C+PIN*→                                | TPR+GreAB-C+PIN              | 1110 | -        | Gammaproteobacteria | <i>Pseudomonas</i> sp. R4-34-07                 | hypothetical protein [Pseudomonas sp. R4-34-07].                               | GCF_003852375.1 |
| WP_124421918.1 | TPR+GreAB-C+PIN*→                                         | TPR+GreAB-C+PIN              | 1157 | -        | Gammaproteobacteria | <i>Pseudomonas orientalis</i>                   | hypothetical protein [Pseudomonas orientalis].                                 | GCF_003851585.1 |
| WP_124432744.1 | REase+TPR+GreAB-C+PIN*→                                   | REase+TPR+GreAB-C+PIN        | 1321 | -        | Gammaproteobacteria | <i>Pseudomonas orientalis</i>                   | DUF4365 domain-containing protein [Pseudomonas orientalis].                    | GCF_003852045.1 |
| WP_124433851.1 | REase+TPR+GreAB-C+PIN*→                                   | REase+TPR+GreAB-C+PIN        | 1321 | -        | Gammaproteobacteria | <i>Pseudomonas orientalis</i>                   | DUF4365 domain-containing protein [Pseudomonas orientalis].                    | GCF_003852045.1 |
| WP_124551445.1 | HEPN→?→?→ REase+TPR+GreAB-C+PIN*→                         | REase+TPR+GreAB-C+PIN        | 1498 | -        | Betaproteobacteria  | <i>Burkholderia</i> sp. Bp9015                  | tetratricopeptide repeat protein [Burkholderia sp. Bp9015].                    | GCF_003853505.1 |
| WP_124582885.1 | TPR+GreAB-C+PIN*→                                         | TPR+GreAB-C+PIN              | 1248 | -        | Bacteroidetes       | <i>Pedobacter</i> sp. KBW06                     | hypothetical protein [Pedobacter sp. KBW06].                                   | GCF_003852525.1 |
| WP_124686982.1 | REase+TPR+GreAB-C+PIN*→                                   | REase+TPR+GreAB-C+PIN        | 1344 | -        | Betaproteobacteria  | <i>Cupriavidus pauculus</i>                     | tetratricopeptide repeat protein [Cupriavidus pauculus].                       | GCF_003854935.1 |
| WP_124885098.1 | REase+TPR+GreAB-C+PIN*→                                   | REase+TPR+GreAB-C+PIN        | 1351 | -        | Betaproteobacteria  | <i>Burkholderia stagnalis</i>                   | hypothetical protein [Burkholderia stagnalis].                                 | GCF_003857545.1 |
| WP_124919377.1 | REase+TPR+GreAB-C+PIN*→                                   | REase+TPR+GreAB-C+PIN        | 1500 | -        | Betaproteobacteria  | <i>Burkholderia</i>                             | MULTISPECIES: tetratricopeptide repeat protein [Burkholderia].                 | GCF_001528845.1 |
| WP_124920354.1 | HEPN→?→?→ REase+TPR+GreAB-C+PIN*→                         | REase+TPR+GreAB-C+PIN        | 1289 | -        | Betaproteobacteria  | <i>Burkholderia stagnalis</i>                   | tetratricopeptide repeat protein [Burkholderia stagnalis].                     | GCF_003857615.1 |
| WP_125127612.1 | X+PIN*→?→?→?→ MACRODOMAIN→                                | X+PIN                        | 1232 | -        | Firmicutes          | <i>Schaedlerella arabinosiphila</i>             | hypothetical protein [Schaedlerella arabinosiphila].                           | GCF_003885045.1 |
| WP_125255381.1 | REase+TPR+GreAB-C+PIN*→                                   | REase+TPR+GreAB-C+PIN        | 1327 | -        | Alphaproteobacteria | <i>Brevundimonas fluminis</i>                   | DUF4365 domain-containing protein [Brevundimonas fluminis].                    | GCF_003934285.1 |
| WP_125429200.1 | REase+TPR+GreAB-C+PIN*→                                   | REase+TPR+GreAB-C+PIN        | 1284 | -        | Gammaproteobacteria | <i>Stenotrophomonas maltophilia</i>             | GreA/GreB family elongation factor [Stenotrophomonas maltophilia].             | GCF_003935615.1 |
| WP_125440526.1 | <-REase+nSTAND3  TPR+GreAB-C+PIN*→                        | TPR+GreAB-C+PIN              | 1282 | -        | Bacteroidetes       | <i>Hymenobacter perfusus</i>                    | hypothetical protein [Hymenobacter perfusus].                                  | GCF_003944765.1 |
| WP_125601225.1 | HetE-N1→ MNS-Npun2340+TPR+GreAB-C+PIN*→                   | MNS-Npun2340+TPR+GreAB-C+PIN | 1094 | -        | Gammaproteobacteria | <i>Aeromonas salmonicida</i>                    | hypothetical protein [Aeromonas salmonicida].                                  | GCF_003947375.1 |
| WP_125730033.1 | HetE-N1→ TPR+GreAB-C+PIN*→                                | TPR+GreAB-C+PIN              | 1094 | -        | Gammaproteobacteria | <i>Aeromonas salmonicida</i>                    | hypothetical protein [Aeromonas salmonicida].                                  | GCF_003947355.1 |
| WP_126243019.1 | REase+TPR+GreAB-C+PIN*→                                   | REase+TPR+GreAB-C+PIN        | 1333 | -        | Betaproteobacteria  | <i>Burkholderia gladioli</i>                    | hypothetical protein [Burkholderia gladioli].                                  | GCF_902829535.1 |
| WP_126550729.1 | TPR+GreAB-C+PIN*→                                         | TPR+GreAB-C+PIN              | 1140 | -        | Gammaproteobacteria | <i>Pseudomonas aeruginosa</i>                   | hypothetical protein [Pseudomonas aeruginosa].                                 | GCF_001516225.2 |
| WP_126566690.1 | TPR+GreAB-C+PIN*→                                         | TPR+GreAB-C+PIN              | 1043 | -        | Gammaproteobacteria | <i>Pseudomonas aeruginosa</i>                   | hypothetical protein [Pseudomonas aeruginosa].                                 | GCF_003968275.1 |
| WP_126570139.1 | DOC+HTH→ REase+TOPC→?→ HetE-N1→ HetE-N1→ GreAB-C+PIN*→    | GreAB-C+PIN                  | 523  | -        | Gammaproteobacteria | <i>Pseudomonas aeruginosa</i>                   | hypothetical protein [Pseudomonas aeruginosa].                                 | GCF_003969065.1 |
| WP_127030837.1 | HetE-N1→ TPR+GreAB-C+PIN*→                                | TPR+GreAB-C+PIN              | 1093 | -        | Gammaproteobacteria | <i>Pectobacterium versatile</i>                 | hypothetical protein [Pectobacterium versatile].                               | GCF_003990505.1 |
| WP_127257681.1 | REase+TPR+GreAB-C+PIN*→                                   | REase+TPR+GreAB-C+PIN        | 1287 | -        | Alphaproteobacteria | <i>Mesorhizobium</i> sp.                        | hypothetical protein [Mesorhizobium sp. M7A.F.Ca.US.008.03.1.1].               | GCF_003997495.1 |
| WP_127294273.1 | REase+TPR+TPR+GreAB-C+PIN*→                               | REase+TPR+TPR+GreAB-C+PIN    | 1333 | -        | Alphaproteobacteria | <i>Mesorhizobium</i> sp. M6A.T.Ce.TU.016.01.1.1 | GreA/GreB family elongation factor [Mesorhizobium sp. M6A.T.Ce.TU.016.01.1.1]. | GCF_003997065.1 |
| WP_127581798.1 | BirA-HTH→?→ REase+TPR+TPR+GreAB-C+PIN*→                   | REase+TPR+TPR+GreAB-C+PIN    | 1322 | -        | Alphaproteobacteria | <i>Sinorhizobium medicae</i>                    | hypothetical protein [Sinorhizobium medicae].                                  | GCF_004002295.1 |
| WP_128106456.1 | REase+TPR+GreAB-C+PIN*→                                   | REase+TPR+GreAB-C+PIN        | 1323 | -        | Alphaproteobacteria | <i>Acetobacter oryzoeni</i>                     | tetratricopeptide repeat protein [Acetobacter oryzoeni].                       | GCF_004014775.2 |
| WP_128141476.1 | REase+TPR+GreAB-C+PIN*→                                   | REase+TPR+GreAB-C+PIN        | 1616 | -        | Betaproteobacteria  | <i>Janthinobacterium lividum</i>                | hypothetical protein [Janthinobacterium lividum].                              | GCF_900451225.1 |
| WP_128142627.1 | REase+TPR+GreAB-C+PIN*→                                   | REase+TPR+GreAB-C+PIN        | 1269 | -        | Betaproteobacteria  | <i>Janthinobacterium lividum</i>                | hypothetical protein [Janthinobacterium lividum].                              | GCF_900451225.1 |
| WP_128181279.1 | REase+TPR+TPR+GreAB-C+PIN*→                               | REase+TPR+TPR+GreAB-C+PIN    | 1330 | -        | Alphaproteobacteria | <i>Sinirhodobacter populi</i>                   | hypothetical protein [Sinirhodobacter populi].                                 | GCF_004022225.1 |
| WP_128291227.1 | REase+TPR+GreAB-C+PIN*→                                   | REase+TPR+GreAB-C+PIN        | 1320 | -        | Alphaproteobacteria | <i>Afifella aestuarii</i>                       | hypothetical protein [Afifella aestuarii].                                     | GCF_004023665.1 |
| WP_128326676.1 | REase+TPR+GreAB-C+PIN*→                                   | REase+TPR+GreAB-C+PIN        | 1493 | -        | Gammaproteobacteria | <i>Pseudomonas alkylphenolica</i>               | hypothetical protein [Pseudomonas alkylphenolica].                             | GCF_004025535.1 |
| WP_128384334.1 | X+PIN*→                                                   | X+PIN                        | 1055 | -        | Gammaproteobacteria | <i>Hydrogenovibrio thermophilus</i>             | hypothetical protein [Hydrogenovibrio thermophilus].                           | GCF_004028275.1 |
| WP_128449906.1 | REase+TPR+TPR+GreAB-C+PIN*→                               | REase+TPR+TPR+GreAB-C+PIN    | 1385 | -        | Alphaproteobacteria | <i>Rhizobium leguminosarum</i>                  | hypothetical protein [Rhizobium leguminosarum].                                | GCF_004054135.1 |
| WP_128549293.1 | TPR+GreAB-C+PIN*→                                         | TPR+GreAB-C+PIN              | 1187 | -        | Alphaproteobacteria | <i>Salipiger</i>                                | MULTISPECIES: tetratricopeptide repeat protein [Salipiger].                    | GCF_014637265.1 |
| WP_128552168.1 | DOC+HTH→ REase+TOPC→ HetE-N1→ HetE-N1+TPR+GreAB-C+PIN*→   | HetE-N1+TPR+GreAB-C+PIN      | 1123 | -        | Gammaproteobacteria | <i>Pseudomonas aeruginosa</i>                   | hypothetical protein [Pseudomonas aeruginosa].                                 | GCF_003698765.1 |

| acc            | operon                                                    | architecture              | len  | gen.name | taxend                | species                                        | define                                                                        | gca             |
|----------------|-----------------------------------------------------------|---------------------------|------|----------|-----------------------|------------------------------------------------|-------------------------------------------------------------------------------|-----------------|
| WP_128664039.1 | DOC+HTH→ REase+TOPC→?→ HetE-N1→ HetE-N1+TPR+GreAB-C+PIN*→ | HetE-N1+TPR+GreAB-C+PIN   | 1124 | -        | Gammaproteobacteria   | <i>Pseudomonas</i>                             | MULTISPECIES: hypothetical protein [Pseudomonas].                             | GCF_016624455.1 |
| WP_128715623.1 | SIG+HIN-HTH→?→ GreAB-C+PIN*→                              | GreAB-C+PIN               | 540  | -        | Alphaproteobacteria   | <i>Rhizobium acidisoli</i>                     | hypothetical protein [Rhizobium acidisoli].                                   | GCF_002531755.2 |
| WP_128816805.1 | REase→ TPR+PIN*→                                          | TPR+PIN                   | 875  | -        | Actinobacteria        | <i>Streptomyces</i> sp. S063                   | tetratricopeptide repeat protein [Streptomyces sp. S063].                     | GCF_002832675.1 |
| WP_128912272.1 | REase+TPR+GreAB-C+PIN*→                                   | REase+TPR+GreAB-C+PIN     | 1277 | -        | Acidobacteria         | <i>Granulicella sibirica</i>                   | hypothetical protein [Granulicella sibirica].                                 | GCF_004115155.1 |
| WP_129013963.1 | TPR+GreAB-C+PIN*→?→?→?→?→?→ TIR+TPR+TPR→                  | TPR+GreAB-C+PIN           | 1046 | -        | Epsilonproteobacteria | <i>Arcobacter cloacae</i>                      | hypothetical protein [Arcobacter cloacae].                                    | GCF_013201935.1 |
| WP_129107976.1 | REase+TPR+GreAB-C+PIN*→                                   | REase+TPR+GreAB-C+PIN     | 1200 | -        | Epsilonproteobacteria | <i>Halarcobacter bivalviorum</i>               | hypothetical protein [Halarcobacter bivalviorum].                             | GCF_004116705.1 |
| WP_129330071.1 | HetE-N1→?→ TPR+GreAB-C+PIN*→                              | TPR+GreAB-C+PIN           | 739  | -        | Gammaproteobacteria   | <i>Salmonella enterica</i>                     | hypothetical protein [Salmonella enterica].                                   | GCF_004120835.1 |
| WP_129368690.1 | HetE-N1→?→ TPR+GreAB-C+PIN*→                              | TPR+GreAB-C+PIN           | 855  | -        | Gammaproteobacteria   | <i>Salmonella enterica</i>                     | hypothetical protein [Salmonella enterica].                                   | GCF_004120585.1 |
| WP_129411798.1 | REase+TPR+GreAB-C+PIN*→                                   | REase+TPR+GreAB-C+PIN     | 1323 | -        | Alphaproteobacteria   | <i>Mesorhizobium</i> sp. Pch-S                 | hypothetical protein [Mesorhizobium sp. Pch-S].                               | GCF_004136315.1 |
| WP_129485462.1 | REase+TPR+GreAB-C+PIN*→                                   | REase+TPR+GreAB-C+PIN     | 1468 | -        | Gammaproteobacteria   | <i>Pseudomonas syringae</i>                    | hypothetical protein [Pseudomonas syringae].                                  | GCF_004124725.1 |
| WP_129893847.1 | REase+TPR+GreAB-C+PIN*→                                   | REase+TPR+GreAB-C+PIN     | 1309 | -        | Chloroflexi           | <i>Ktedonosporobacter rubrisoli</i>            | tetratricopeptide repeat protein [Ktedonosporobacter rubrisoli].              | GCF_004208415.1 |
| WP_130007120.1 | HetE-N1→ HetE-N1+TPR+GreAB-C+PIN*→                        | HetE-N1+TPR+GreAB-C+PIN   | 1104 | -        | Betaproteobacteria    | <i>Pusillimonas ginsengisoli</i>               | hypothetical protein [Pusillimonas ginsengisoli].                             | GCF_004153455.1 |
| WP_130044922.1 | HetE-N1→ TPR+GreAB-C+PIN*→                                | TPR+GreAB-C+PIN           | 1116 | -        | Gammaproteobacteria   | <i>Aliivibrio finisterrensis</i>               | hypothetical protein [Aliivibrio finisterrensis].                             | GCF_004167675.1 |
| WP_130132480.1 | REase+TPR+GreAB-C+PIN*→                                   | REase+TPR+GreAB-C+PIN     | 1245 | -        | Gammaproteobacteria   | <i>Acinetobacter wuhouensis</i>                | hypothetical protein [Acinetobacter wuhouensis].                              | GCF_004209325.1 |
| WP_130204115.1 | HetE-N1→ TPR+GreAB-C+PIN*→                                | TPR+GreAB-C+PIN           | 1113 | -        | Gammaproteobacteria   | <i>Pseudomonas moorei</i>                      | hypothetical protein [Pseudomonas moorei].                                    | GCF_004212425.1 |
| WP_130252287.1 | HetE-N1→ TPR+GreAB-C+PIN*→                                | TPR+GreAB-C+PIN           | 1114 | -        | Gammaproteobacteria   | <i>Vibrio vulnificus</i>                       | hypothetical protein [Vibrio vulnificus].                                     | GCF_004214575.1 |
| WP_130472343.1 | REase+TPR+GreAB-C+PIN*→                                   | REase+TPR+GreAB-C+PIN     | 1348 | -        | Alphaproteobacteria   | <i>Candidatus Magnetaquicoccus inordinatus</i> | hypothetical protein [Candidatus Magnetaquicoccus inordinatus].               | GCF_004217665.1 |
| WP_130525307.1 | HetE-N1→ TPR+GreAB-C+PIN*→                                | TPR+GreAB-C+PIN           | 1086 | -        | Gammaproteobacteria   | <i>Pasteurella multocida</i>                   | hypothetical protein [Pasteurella multocida].                                 | GCF_003428945.1 |
| WP_130555679.1 | HetE-N1→ TPR+GreAB-C+PIN*→                                | TPR+GreAB-C+PIN           | 1086 | -        | Gammaproteobacteria   | <i>Pasteurella multocida</i>                   | hypothetical protein [Pasteurella multocida].                                 | GCF_001578435.2 |
| WP_130710767.1 | REase+TPR+TPR+GreAB-C+PIN*→                               | REase+TPR+TPR+GreAB-C+PIN | 1343 | -        | Alphaproteobacteria   | <i>Rhizobium leguminosarum</i>                 | hypothetical protein [Rhizobium leguminosarum].                               | GCF_004304355.1 |
| WP_130725527.1 | REase+TPR+GreAB-C+PIN*→                                   | REase+TPR+GreAB-C+PIN     | 1255 | -        | Alphaproteobacteria   | <i>Rhizobium leguminosarum</i>                 | hypothetical protein [Rhizobium leguminosarum].                               | GCF_004303985.1 |
| WP_130928792.1 | REase+TPR+GreAB-C+PIN*→                                   | REase+TPR+GreAB-C+PIN     | 1438 | -        | Gammaproteobacteria   | <i>Pseudomonas</i> sp. Sample_20               | hypothetical protein [Pseudomonas sp. Sample_20].                             | GCF_004307585.1 |
| WP_131049955.1 | HetE-N1→ TPR+GreAB-C+PIN*→                                | TPR+GreAB-C+PIN           | 1092 | -        | Gammaproteobacteria   | <i>Raoultella ornithinolytica</i>              | hypothetical protein [Raoultella ornithinolytica].                            | GCF_004312065.1 |
| WP_131189445.1 | HetE-N1→ HetE-N1+TPR+GreAB-C+PIN*→                        | HetE-N1+TPR+GreAB-C+PIN   | 1125 | -        | Gammaproteobacteria   | <i>Pseudomonas kirkiae</i>                     | hypothetical protein [Pseudomonas kirkiae].                                   | GCF_004327175.1 |
| WP_131590605.1 | TPR+PIN*→                                                 | TPR+PIN                   | 1153 | -        | Actinobacteria        | <i>Mycolicibacterium setense</i>               | hypothetical protein [Mycolicibacterium setense].                             | GCF_000805375.1 |
| WP_131623255.1 | REase+TPR+TPR+GreAB-C+PIN*→                               | REase+TPR+TPR+GreAB-C+PIN | 1361 | -        | Alphaproteobacteria   | <i>Rhizobium leguminosarum</i>                 | hypothetical protein [Rhizobium leguminosarum].                               | GCF_004330075.1 |
| WP_131714066.1 | REase+TPR+TPR+GreAB-C+PIN*→                               | REase+TPR+TPR+GreAB-C+PIN | 1337 | -        | Alphaproteobacteria   | <i>Rhizobium leguminosarum</i>                 | hypothetical protein [Rhizobium leguminosarum].                               | GCF_004330185.1 |
| WP_131718233.1 | TPR+GreAB-C+PIN*→                                         | TPR+GreAB-C+PIN           | 556  | -        | Alphaproteobacteria   | <i>Rhizobium leguminosarum</i>                 | hypothetical protein [Rhizobium leguminosarum].                               | GCF_004330625.1 |
| WP_131814603.1 | TPR+GreAB-C+PIN*→                                         | TPR+GreAB-C+PIN           | 595  | -        | Alphaproteobacteria   | <i>Cognatishimia maritima</i>                  | hypothetical protein [Cognatishimia maritima].                                | GCF_900129685.1 |
| WP_131869160.1 | TPR+GreAB-C+PIN*→                                         | TPR+GreAB-C+PIN           | 1306 | -        | Alphaproteobacteria   | unclassified Bradyrhizobium                    | MULTISPECIES: tetratricopeptide repeat protein [unclassified Bradyrhizobium]. | GCF_004346395.1 |
| WP_132139369.1 | REase+TPR+GreAB-C+PIN*→                                   | REase+TPR+GreAB-C+PIN     | 1368 | -        | Betaproteobacteria    | <i>Massilia</i> sp. GV090                      | hypothetical protein [Massilia sp. GV090].                                    | GCF_004341465.1 |
| WP_132251347.1 | TPR+GreAB-C+PIN*→                                         | TPR+GreAB-C+PIN           | 1114 | -        | Alphaproteobacteria   | <i>Methylobacterium segetis</i>                | tetratricopeptide repeat protein [Methylobacterium segetis].                  | GCF_004348265.1 |
| WP_132403375.1 | TPR+GreAB-C+PIN*→                                         | TPR+GreAB-C+PIN           | 1266 | -        | Bacteroidetes         | <i>Pedobacter</i> sp. CF074                    | hypothetical protein [Pedobacter sp. CF074].                                  | GCF_004342125.1 |
| WP_132537157.1 | BirA-HTH→ HEPN→ REase+TPR+TPR+GreAB-C+PIN*→               | REase+TPR+TPR+GreAB-C+PIN | 1332 | -        | Alphaproteobacteria   | <i>Rhizobium</i> sp. PP-F2F-G48                | GreA/GreB family elongation factor [Rhizobium sp. PP-F2F-G48].                | GCF_004342335.1 |
| WP_132665856.1 | REase+TPR+GreAB-C+PIN*→                                   | REase+TPR+GreAB-C+PIN     | 1297 | -        | Alphaproteobacteria   | <i>Rhizobium</i> sp. PP-CC-3G-465              | tetratricopeptide repeat protein [Rhizobium sp. PP-CC-3G-465].                | GCF_004343445.1 |
| WP_132831667.1 | TPR+GreAB-C+PIN*→                                         | TPR+GreAB-C+PIN           | 1188 | -        | Alphaproteobacteria   | <i>Antarcticimicrobium sediminis</i>           | hypothetical protein [Antarcticimicrobium sediminis].                         | GCF_004348975.1 |
| WP_132850706.1 | TPR+PIN*→                                                 | TPR+PIN                   | 1135 | -        | Actinobacteria        | <i>Streptomyces</i> sp. BK308                  | tetratricopeptide repeat protein [Streptomyces sp. BK308].                    | GCF_004346005.1 |
| WP_133023868.1 | TPR+PIN*→                                                 | TPR+PIN                   | 1216 | -        | Actinobacteria        | <i>Streptomyces</i> sp. BK329                  | hypothetical protein [Streptomyces sp. BK329].                                | GCF_004341055.1 |
| WP_133030467.1 | REase+TPR+GreAB-C+PIN*→                                   | REase+TPR+GreAB-C+PIN     | 1317 | -        | Alphaproteobacteria   | <i>Sphingomonas</i> sp. PP-CE-1G-424           | tetratricopeptide repeat protein [Sphingomonas sp. PP-CE-1G-424].             | GCF_004341085.1 |

| acc            | operon                       | architecture              | len  | gen.name | taxend              | species                              | define                                                         | gca             |
|----------------|------------------------------|---------------------------|------|----------|---------------------|--------------------------------------|----------------------------------------------------------------|-----------------|
| WP_133031998.1 | REase+TPR+GreAB-C+PIN*→      | REase+TPR+GreAB-C+PIN     | 1323 | -        | Alphaproteobacteria | Sphingomonas sp. PP-CE-1G-424        | hypothetical protein [Sphingomonas sp. PP-CE-1G-424].          | GCF_004341085.1 |
| WP_133117283.1 | REase+TPR+TPR+GreAB-C+PIN*→  | REase+TPR+TPR+GreAB-C+PIN | 1332 | -        | Alphaproteobacteria | Mesorhizobium sanjuanii              | hypothetical protein [Mesorhizobium sanjuanii].                | GCF_002529485.1 |
| WP_133245819.1 | REase+TPR+GreAB-C+PIN*→      | REase+TPR+GreAB-C+PIN     | 1322 | -        | Alphaproteobacteria | Candidatus Phycosocius bacilliformis | hypothetical protein [Candidatus Phycosocius bacilliformis].   | GCF_003112735.1 |
| WP_133303262.1 | TPR+GreAB-C+PIN*→            | TPR+GreAB-C+PIN           | 1082 | -        | Alphaproteobacteria | Rhodopseudomonas palustris           | hypothetical protein [Rhodopseudomonas palustris].             | GCF_013415845.1 |
| WP_133404970.1 | REase+TPR+GreAB-C+PIN*→      | REase+TPR+GreAB-C+PIN     | 1260 | -        | Actinobacteria      | Arthrobacter crusticola              | DUF4365 domain-containing protein [Arthrobacter crusticola].   | GCF_004357995.1 |
| WP_133633736.1 | REase+TPR+GreAB-C+PIN*→      | REase+TPR+GreAB-C+PIN     | 1321 | -        | Gammaproteobacteria | Pseudomonas sp. OV184                | DUF4365 domain-containing protein [Pseudomonas sp. OV184].     | GCF_004363115.1 |
| WP_133936590.1 | REase+TPR+GreAB-C+PIN*→      | REase+TPR+GreAB-C+PIN     | 1489 | -        | Betaproteobacteria  | Comamonas kerstersii                 | tetratricopeptide repeat protein [Comamonas kerstersii].       | GCF_002002425.1 |
| WP_134016909.1 | REase+TPR+GreAB-C+PIN*→      | REase+TPR+GreAB-C+PIN     | 1313 | -        | Alphaproteobacteria | Litoreibacter halocynthiae           | hypothetical protein [Litoreibacter halocynthiae].             | GCF_004365635.1 |
| WP_134268494.1 | PIN*→                        | PIN                       | 186  | -        | Firmicutes          | Sporosarcina pasteurii               | hypothetical protein [Sporosarcina pasteurii].                 | GCF_004379295.1 |
| WP_134281591.1 | TPR+GreAB-C+PIN*→            | TPR+GreAB-C+PIN           | 1159 | -        | Gammaproteobacteria | Pseudomonas                          | MULTISPECIES: hypothetical protein [Pseudomonas].              | GCF_013522725.1 |
| WP_135194680.1 | REase+TPR+GreAB-C+PIN*→      | REase+TPR+GreAB-C+PIN     | 1327 | -        | Alphaproteobacteria | Brevundimonas intermedia             | DUF4365 domain-containing protein [Brevundimonas intermedia].  | GCF_004614235.1 |
| WP_135269295.1 | TPR+PIN*→                    | TPR+PIN                   | 1211 | -        | Actinobacteria      | Nocardioides seonyuensis             | hypothetical protein [Nocardioides seonyuensis].               | GCF_004683965.1 |
| WP_135300409.1 | HetE-N1→ TPR+GreAB-C+PIN*→   | TPR+GreAB-C+PIN           | 1130 | -        | Gammaproteobacteria | Photobacterium damsela               | hypothetical protein [Photobacterium damsela].                 | GCF_004683985.2 |
| WP_135312567.1 | REase+TPR+GreAB-C+PIN→ PIN*→ | PIN                       | 479  | -        | Alphaproteobacteria | Paracoccus liaowanqingii             | hypothetical protein [Paracoccus liaowanqingii].               | GCF_004683865.2 |
| WP_135953001.1 | HetE-N1→ TPR+GreAB-C+PIN*→   | TPR+GreAB-C+PIN           | 987  | -        | Gammaproteobacteria | Pasteurella multocida                | hypothetical protein [Pasteurella multocida].                  | GCF_004792575.1 |
| WP_135961458.1 | HetE-N1→ TPR+GreAB-C+PIN*→   | TPR+GreAB-C+PIN           | 1086 | -        | Gammaproteobacteria | Pasteurella multocida                | hypothetical protein [Pasteurella multocida].                  | GCF_004792555.1 |
| WP_136247578.1 | HetE-N1→ TPR+GreAB-C+PIN*→   | TPR+GreAB-C+PIN           | 1103 | -        | Gammaproteobacteria | Halomonas borealis                   | hypothetical protein [Halomonas borealis].                     | GCF_004798905.1 |
| WP_136878408.1 | TPR+GreAB-C+PIN*→            | TPR+GreAB-C+PIN           | 1248 | -        | Bacteroidetes       | Pedobacter sp. AR-2-6                | hypothetical protein [Pedobacter sp. AR-2-6].                  | GCF_005116475.1 |
| WP_137004448.1 | REase+TPR+GreAB-C+PIN*→      | REase+TPR+GreAB-C+PIN     | 1290 | -        | Alphaproteobacteria | Agrobacterium tumefaciens            | hypothetical protein [Agrobacterium tumefaciens].              | GCF_005221405.1 |
| WP_137059419.1 | TPR+PIN*→                    | TPR+PIN                   | 1157 | -        | Firmicutes          | Bacillus mycoides                    | hypothetical protein [Bacillus mycoides].                      | GCF_005217805.1 |
| WP_137213367.1 | TPR+GreAB-C+PIN*→            | TPR+GreAB-C+PIN           | 1139 | -        | Gammaproteobacteria | Pseudomonas sp. CFBP13508            | hypothetical protein [Pseudomonas sp. CFBP13508].              | GCF_005233515.1 |
| WP_137383131.1 | HetE-N1→ TPR+GreAB-C+PIN*→   | TPR+GreAB-C+PIN           | 1091 | -        | Gammaproteobacteria | Citrobacter sp. wls619               | hypothetical protein [Citrobacter sp. wls619].                 | GCF_005281345.1 |
| WP_137387523.1 | HetE-N1→ TPR+GreAB-C+PIN*→   | TPR+GreAB-C+PIN           | 1101 | -        | Gammaproteobacteria | Pantoea sp. SO10                     | hypothetical protein [Pantoea sp. SO10].                       | GCF_005281435.1 |
| WP_137434419.1 | REase+TPR+GreAB-C+PIN*→      | REase+TPR+GreAB-C+PIN     | 1288 | -        | Gammaproteobacteria | Marinobacter sp. PJ-16               | hypothetical protein [Marinobacter sp. PJ-16].                 | GCF_005298175.1 |
| WP_137735239.1 | REase+TPR+GreAB-C+PIN*→      | REase+TPR+GreAB-C+PIN     | 1437 | -        | Betaproteobacteria  | Aquabacterium pictum                 | hypothetical protein [Aquabacterium pictum].                   | GCF_005403045.1 |
| WP_137905827.1 | TPR+GreAB-C+PIN*→            | TPR+GreAB-C+PIN           | 1130 | -        | Bacteroidetes       | Chryseobacterium sp. 2VB             | hypothetical protein [Chryseobacterium sp. 2VB].               | GCF_005503635.1 |
| WP_138242320.1 | HetE-N1→ TPR+GreAB-C+PIN*→   | TPR+GreAB-C+PIN           | 1130 | -        | Gammaproteobacteria | Photobacterium damsela               | hypothetical protein [Photobacterium damsela].                 | GCF_005819845.1 |
| WP_138262872.1 | X+PIN*→                      | X+PIN                     | 1204 | -        | Firmicutes          | Enterocloster clostridioformis       | hypothetical protein [Enterocloster clostridioformis].         | GCF_015548065.1 |
| WP_138402485.1 | TPR+GreAB-C+PIN*→            | TPR+GreAB-C+PIN           | 1137 | -        | Bacteroidetes       | Chryseobacterium indologenes         | hypothetical protein [Chryseobacterium indologenes].           | GCF_005862425.1 |
| WP_138437829.1 | HetE-N1→ GreAB-C*→           | GreAB-C                   | 802  | -        | Gammaproteobacteria | Marinobacter                         | MULTISPECIES: hypothetical protein [Marinobacter].             | GCF_005871095.1 |
| WP_138616099.1 | HetE-N1→ TPR+GreAB-C+PIN*→   | TPR+GreAB-C+PIN           | 1106 | -        | Gammaproteobacteria | Pseudoalteromonas sp. S2721          | hypothetical protein [Pseudoalteromonas sp. S2721].            | GCF_005887425.1 |
| WP_139051161.1 | TPR+GreAB-C+PIN*→            | TPR+GreAB-C+PIN           | 1158 | -        | Gammaproteobacteria | unclassified Pseudomonas             | MULTISPECIES: hypothetical protein [unclassified Pseudomonas]. | GCF_901007645.1 |
| WP_139100594.1 | TPR+PIN*→                    | TPR+PIN                   | 1197 | -        | Actinobacteria      | Amycolatopsis alkalitolerans         | hypothetical protein [Amycolatopsis alkalitolerans].           | GCF_006152065.1 |
| WP_139135497.1 | X+PIN*→                      | X+PIN                     | 1093 | -        | Actinobacteria      | Micromonospora tulbaghia             | hypothetical protein [Micromonospora tulbaghia].               | GCF_900091605.1 |
| WP_139156465.1 | HetE-N1→?→ TPR+GreAB-C+PIN*→ | TPR+GreAB-C+PIN           | 523  | -        | Gammaproteobacteria | Salmonella enterica                  | hypothetical protein [Salmonella enterica].                    | GCF_003071545.1 |
| WP_139230170.1 | TPR+PIN*→                    | TPR+PIN                   | 1206 | -        | Actinobacteria      | Nocardioides terrae                  | hypothetical protein [Nocardioides terrae].                    | GCF_900112345.1 |
| WP_139231027.1 | TPR+GreAB-C+PIN*→            | TPR+GreAB-C+PIN           | 1155 | -        | Gammaproteobacteria | Pseudomonas sagittaria               | hypothetical protein [Pseudomonas sagittaria].                 | GCF_900115715.1 |

| acc            | operon                                                               | architecture            | len  | gen.name | taxend                | species                                             | define                                                                                  | gca             |
|----------------|----------------------------------------------------------------------|-------------------------|------|----------|-----------------------|-----------------------------------------------------|-----------------------------------------------------------------------------------------|-----------------|
| WP_139231685.1 | REase+TPR+GreAB-C+PIN*→?→?→ Calcineurin→ Calcineurin→?→ Calcineurin→ | REase+TPR+GreAB-C+PIN   | 1314 | -        | Alphaproteobacteria   | Methylobacterium phyllosphaerae                     | hypothetical protein [Methylobacterium phyllosphaerae].                                 | GCF_001936175.1 |
| WP_139585558.1 | TPR+PIN*→                                                            | TPR+PIN                 | 1173 | -        | Actinobacteria        | Micromonospora orduensis                            | hypothetical protein [Micromonospora orduensis].                                        | GCF_006228125.1 |
| WP_139699848.1 | TPR+GreAB-C+PIN*→                                                    | TPR+GreAB-C+PIN         | 1163 | -        | unclassified Bacteria | bacterium endosymbiont of Bathymodiolus sp. 5 South | tetratricopeptide repeat protein [bacterium endosymbiont of Bathymodiolus sp. 5 South]. | GCF_900127295.1 |
| WP_139711990.1 | TPR+PIN*→                                                            | TPR+PIN                 | 816  | -        | Actinobacteria        | Streptomyces sp. NP160                              | hypothetical protein [Streptomyces sp. NP160].                                          | GCF_006335115.1 |
| WP_139741421.1 | HetE-N1→ TPR+GreAB-C+PIN*→                                           | TPR+GreAB-C+PIN         | 1086 | -        | Gammaproteobacteria   | Aeromonas veronii                                   | hypothetical protein [Aeromonas veronii].                                               | GCF_006243415.1 |
| WP_139832542.1 | REase+TPR+GreAB-C+PIN*→                                              | REase+TPR+GreAB-C+PIN   | 1427 | -        | Gammaproteobacteria   | Pseudomonas sp. B26(2017)                           | hypothetical protein [Pseudomonas sp. B26(2017)].                                       | GCF_002113045.1 |
| WP_139834254.1 | HetE-N1→?→ TPR+GreAB-C+PIN*→                                         | TPR+GreAB-C+PIN         | 686  | -        | Gammaproteobacteria   | Pseudomonas sp. B11(2017)                           | hypothetical protein [Pseudomonas sp. B11(2017)].                                       | GCF_002113285.1 |
| WP_140034365.1 | HetE-N1→ TPR+GreAB-C+PIN*→                                           | TPR+GreAB-C+PIN         | 1111 | -        | Gammaproteobacteria   | Pantoea vagans                                      | hypothetical protein [Pantoea vagans].                                                  | GCF_006385385.1 |
| WP_140089969.1 | GreAB-C*→                                                            | GreAB-C                 | 561  | -        | Gammaproteobacteria   | Vibrio parahaemolyticus                             | hypothetical protein [Vibrio parahaemolyticus].                                         | GCF_006372765.1 |
| WP_140136560.1 | TPR+GreAB-C+PIN*→                                                    | TPR+GreAB-C+PIN         | 381  | -        | Gammaproteobacteria   | Vibrio parahaemolyticus                             | hypothetical protein, partial [Vibrio parahaemolyticus].                                | GCF_006369095.1 |
| WP_140150658.1 | HetE-N1→ TPR+GreAB-C+PIN*→                                           | TPR+GreAB-C+PIN         | 1100 | -        | Gammaproteobacteria   | Vibrio parahaemolyticus                             | hypothetical protein [Vibrio parahaemolyticus].                                         | GCF_006375025.1 |
| WP_140184851.1 | HetE-N1→ TPR+GreAB-C+PIN*→                                           | TPR+GreAB-C+PIN         | 1133 | -        | Gammaproteobacteria   | Vibrio parahaemolyticus                             | hypothetical protein [Vibrio parahaemolyticus].                                         | GCF_006375315.1 |
| WP_140247351.1 | HetE-N1→ TPR+GreAB-C+PIN*→                                           | TPR+GreAB-C+PIN         | 1114 | -        | Gammaproteobacteria   | Vibrio parahaemolyticus                             | hypothetical protein [Vibrio parahaemolyticus].                                         | GCF_006371495.1 |
| WP_140523105.1 | REase+TPR+GreAB-C+PIN*→                                              | REase+TPR+GreAB-C+PIN   | 1330 | -        | Alphaproteobacteria   | unclassified Mesorhizobium                          | MULTISPECIES: tetratricopeptide repeat protein [unclassified Mesorhizobium].            | GCF_006439485.1 |
| WP_140649671.1 | REase+TPR+GreAB-C+PIN*→                                              | REase+TPR+GreAB-C+PIN   | 1330 | -        | Alphaproteobacteria   | Mesorhizobium sp. B2-4-10                           | tetratricopeptide repeat protein [Mesorhizobium sp. B2-4-10].                           | GCF_006442675.1 |
| WP_140682745.1 | HetE-N1→ TPR+GreAB-C+PIN*→                                           | TPR+GreAB-C+PIN         | 1113 | -        | Gammaproteobacteria   | Pseudomonas mandelii                                | hypothetical protein [Pseudomonas mandelii].                                            | GCF_006438925.1 |
| WP_140739373.1 | REase+TPR+GreAB-C+PIN*→                                              | REase+TPR+GreAB-C+PIN   | 994  | -        | Alphaproteobacteria   | unclassified Mesorhizobium                          | MULTISPECIES: hypothetical protein [unclassified Mesorhizobium].                        | GCF_006440845.1 |
| WP_141097119.1 | TPR+GreAB-C+PIN*→                                                    | TPR+GreAB-C+PIN         | 1209 | -        | Actinobacteria        | Microbacterium sp. AISO3                            | hypothetical protein [Microbacterium sp. AISO3].                                        | GCF_002204305.1 |
| WP_141144329.1 | X+PIN*→                                                              | X+PIN                   | 1189 | -        | Actinobacteria        | Schumannella sp. 10F1B-5-1                          | hypothetical protein [Schumannella sp. 10F1B-5-1].                                      | GCF_006517535.1 |
| WP_141202816.1 | TPR+PIN*→                                                            | TPR+PIN                 | 1217 | -        | Actinobacteria        | Streptomyces griseorubiginosus                      | hypothetical protein [Streptomyces griseorubiginosus].                                  | GCF_006516935.1 |
| WP_141414632.1 | HetE-N1→ TPR+GreAB-C+PIN*→                                           | TPR+GreAB-C+PIN         | 1106 | -        | Gammaproteobacteria   | Enterobacter hormaechei                             | hypothetical protein [Enterobacter hormaechei].                                         | GCF_006546545.1 |
| WP_141566570.1 | TPR+PIN*→                                                            | TPR+PIN                 | 1237 | -        | -                     | Pseudonocardia sp. N23                              | hypothetical protein [Pseudonocardia sp. N23].                                          | GCF_002583555.1 |
| WP_141708179.1 | REase+TPR+GreAB-C+PIN*→                                              | REase+TPR+GreAB-C+PIN   | 1338 | -        | Actinobacteria        | Micromonospora marina                               | hypothetical protein [Micromonospora marina].                                           | GCF_900091565.1 |
| WP_141709791.1 | TPR+PIN*→   <-NUDIX                                                  | TPR+PIN                 | 1088 | -        | Actinobacteria        | Streptomyces                                        | MULTISPECIES: hypothetical protein [Streptomyces].                                      | GCF_000514055.1 |
| WP_142342557.1 | TPR+PIN*→                                                            | TPR+PIN                 | 1016 | -        | Firmicutes            | Bacillus cereus                                     | hypothetical protein [Bacillus cereus].                                                 | GCF_002577165.1 |
| WP_142621974.1 | TPR+GreAB-C+PIN*→                                                    | TPR+GreAB-C+PIN         | 456  | -        | Gammaproteobacteria   | Vibrio cholerae                                     | hypothetical protein [Vibrio cholerae].                                                 | GCF_006802685.1 |
| WP_142996755.1 | <-REase  TPR+PIN*→                                                   | TPR+PIN                 | 993  | -        | Firmicutes            | Bacillus sp. KQ-3                                   | hypothetical protein [Bacillus sp. KQ-3].                                               | GCF_003710255.1 |
| WP_143042354.1 | REase+TPR+GreAB-C+PIN*→                                              | REase+TPR+GreAB-C+PIN   | 1329 | -        | Alphaproteobacteria   | Citriimonas salinaria                               | restriction endonuclease [Citriimonas salinaria].                                       | GCF_900107235.1 |
| WP_143064837.1 | TPR+PIN*→                                                            | TPR+PIN                 | 1134 | -        | Actinobacteria        | Streptomyces sp. PAN_FS17                           | hypothetical protein [Streptomyces sp. PAN_FS17].                                       | GCF_900105465.1 |
| WP_143167506.1 | REase+TPR+GreAB-C+PIN*→                                              | REase+TPR+GreAB-C+PIN   | 1482 | -        | Betaproteobacteria    | Massilia sp. CF038                                  | hypothetical protein [Massilia sp. CF038].                                              | GCF_900129765.1 |
| WP_143171741.1 | PAIREDC-HTH→ REase+TPR+GreAB-C+PIN*→                                 | REase+TPR+GreAB-C+PIN   | 1539 | -        | Betaproteobacteria    | Rhizobacter sp. OV335                               | hypothetical protein [Rhizobacter sp. OV335].                                           | GCF_900142965.1 |
| WP_143206624.1 | REase+TPR+GreAB-C+PIN*→                                              | REase+TPR+GreAB-C+PIN   | 1273 | -        | Planctomycetes        | Singulisphaera sp. GP187                            | hypothetical protein [Singulisphaera sp. GP187].                                        | GCF_900129635.1 |
| WP_143268820.1 | REase+TPR+GreAB-C+PIN→ PIN*→                                         | PIN                     | 279  | -        | Actinobacteria        | Amycolatopsis vastitatis                            | hypothetical protein [Amycolatopsis vastitatis].                                        | GCF_002234595.1 |
| WP_143494315.1 | DOC+HTH→ REase+TOPC→ HetE-N1→ HetE-N1+TPR+GreAB-C+PIN*→              | HetE-N1+TPR+GreAB-C+PIN | 1124 | -        | Gammaproteobacteria   | Pseudomonas putida                                  | hypothetical protein [Pseudomonas putida].                                              | GCF_007049805.1 |
| WP_143685467.1 | TPR+PIN*→                                                            | TPR+PIN                 | 1135 | -        | Actinobacteria        | Streptomyces sp. 1222.2                             | hypothetical protein [Streptomyces sp. 1222.2].                                         | GCF_900215595.1 |
| WP_143686526.1 | TPR+PIN*→                                                            | TPR+PIN                 | 1189 | -        | Actinobacteria        | Streptomyces sp. 61                                 | hypothetical protein [Streptomyces sp. 61].                                             | GCF_002754535.1 |
| WP_143775988.1 | REase+TPR+GreAB-C+PIN*→                                              | REase+TPR+GreAB-C+PIN   | 1312 | -        | Alphaproteobacteria   | Sphingorhabdus contaminans                          | hypothetical protein [Sphingorhabdus contaminans].                                      | GCF_007280415.1 |
| WP_144044861.1 | HetE-N1→ GreAB-C*→ TPR+GreAB-C+PIN→                                  | GreAB-C                 | 779  | -        | Gammaproteobacteria   | Shewanella sp. YLB-06                               | GreA/GreB family elongation factor [Shewanella sp. YLB-06].                             | GCF_007197555.1 |

| acc            | operon                                   | architecture              | len  | gen.name | taxend              | species                                       | define                                                                  | gca             |
|----------------|------------------------------------------|---------------------------|------|----------|---------------------|-----------------------------------------------|-------------------------------------------------------------------------|-----------------|
| WP_144084411.1 | HetE-N1→ TPR+TPR+GreAB-C+PIN*→           | TPR+TPR+GreAB-C+PIN       | 1108 | -        | Gammaproteobacteria | <i>Pseudomonas monteilii</i>                  | hypothetical protein [Pseudomonas monteilii].                           | GCF_000510285.1 |
| WP_144190111.1 | HetE-N1→ TPR+GreAB-C+PIN*→               | TPR+GreAB-C+PIN           | 1126 | -        | Gammaproteobacteria | <i>Gilliamella apicola</i>                    | hypothetical protein [Gilliamella apicola].                             | GCF_007559165.1 |
| WP_144217154.1 | TPR+GreAB-C+PIN*→                        | TPR+GreAB-C+PIN           | 1236 | -        | Gammaproteobacteria | <i>Vibrio cholerae</i>                        | hypothetical protein [Vibrio cholerae].                                 | GCF_007623805.1 |
| WP_144226215.1 | HetE-N1→ TPR+GreAB-C+PIN*→               | TPR+GreAB-C+PIN           | 1101 | -        | Gammaproteobacteria | <i>Shewanella algae</i>                       | hypothetical protein [Shewanella algae].                                | GCF_007595165.1 |
| WP_144269797.1 | REase+TPR+GreAB-C+PIN*→                  | REase+TPR+GreAB-C+PIN     | 1288 | -        | Gammaproteobacteria | <i>Pseudomonas fluorescens</i>                | DUF4365 domain-containing protein [Pseudomonas fluorescens].            | GCF_000262325.2 |
| WP_144298906.1 | X+PIN*→                                  | X+PIN                     | 676  | -        | Actinobacteria      | <i>Streptomyces</i> sp. TLI_235               | hypothetical protein [Streptomyces sp. TLI_235].                        | GCF_002300355.1 |
| WP_144431187.1 | REase+TPR+GreAB-C+PIN*→                  | REase+TPR+GreAB-C+PIN     | 1441 | -        | Gammaproteobacteria | <i>Pseudomonas syringae</i> pv. <i>coryli</i> | hypothetical protein [Pseudomonas syringae pv. coryli].                 | GCF_000972175.1 |
| WP_144762711.1 | X+PIN*→                                  | X+PIN                     | 1177 | -        | Actinobacteria      | <i>Curtobacterium</i> sp. 9128                | hypothetical protein [Curtobacterium sp. 9128].                         | GCF_007673775.1 |
| WP_144916164.1 | TPR+GreAB-C+PIN→ PIN*→                   | PIN                       | 238  | -        | Bacteroidetes       | <i>Mucilaginibacter frigoritolerans</i>       | hypothetical protein [Mucilaginibacter frigoritolerans].                | GCF_007830615.1 |
| WP_145052948.1 | TPR+PIN*→                                | TPR+PIN                   | 1410 | -        | Planctomycetes      | <i>Lignipirellula cremea</i>                  | hypothetical protein [Lignipirellula cremea].                           | GCF_007751035.1 |
| WP_145376920.1 | TPR+PIN*→                                | TPR+PIN                   | 2081 | -        | Planctomycetes      | <i>Symmachiella dynata</i>                    | hypothetical protein [Symmachiella dynata].                             | GCF_007747995.1 |
| WP_145427683.1 | REase+TPR+GreAB-C+PIN→ TPR+GreAB-C+PIN*→ | TPR+GreAB-C+PIN           | 514  | -        | Planctomycetes      | <i>Symmachiella dynata</i>                    | hypothetical protein [Symmachiella dynata].                             | GCF_007744975.1 |
| WP_145441613.1 | TPR+PIN*→                                | TPR+PIN                   | 2077 | -        | Planctomycetes      | <i>Gimesia chilikensis</i>                    | hypothetical protein [Gimesia chilikensis].                             | GCF_007746535.1 |
| WP_145577942.1 | HetE-N1→ TPR+GreAB-C+PIN*→               | TPR+GreAB-C+PIN           | 1084 | -        | Gammaproteobacteria | <i>Vibrio crassostreae</i>                    | hypothetical protein [Vibrio crassostreae].                             | GCF_017916675.1 |
| WP_145860820.1 | TPR+GreAB-C+PIN→ PIN*→                   | PIN                       | 347  | -        | Bacteroidetes       | <i>Pedobacter suwonensis</i>                  | hypothetical protein [Pedobacter suwonensis].                           | GCF_007833675.1 |
| WP_145895823.1 | REase+TPR+GreAB-C+PIN*→                  | REase+TPR+GreAB-C+PIN     | 1508 | -        | Betaproteobacteria  | <i>Caenimonas</i> sp. HX-9-20                 | hypothetical protein [Caenimonas sp. HX-9-20].                          | GCF_007833165.1 |
| WP_145923949.1 | TPR+GreAB-C+PIN*→                        | TPR+GreAB-C+PIN           | 1170 | -        | Gammaproteobacteria | <i>Pseudomonas citronellolis</i>              | hypothetical protein [Pseudomonas citronellolis].                       | GCF_001586155.1 |
| WP_145975538.1 | REase+TPR+GreAB-C+PIN*→                  | REase+TPR+GreAB-C+PIN     | 1365 | -        | Deinococci          | <i>Deinococcus gobiensis</i>                  | hypothetical protein [Deinococcus gobiensis].                           | GCF_000252445.1 |
| WP_145980369.1 | HetE-N1→ TPR+GreAB-C+PIN*→               | TPR+GreAB-C+PIN           | 1113 | -        | Gammaproteobacteria | <i>Pseudomonas lurida</i>                     | hypothetical protein [Pseudomonas lurida].                              | GCF_001708485.1 |
| WP_145994348.1 | REase+TPR+TPR+GreAB-C+PIN*→              | REase+TPR+TPR+GreAB-C+PIN | 1339 | -        | Alphaproteobacteria | <i>Mesorhizobium loti</i>                     | hypothetical protein [Mesorhizobium loti].                              | GCF_002858745.1 |
| WP_146048182.1 | PIN*→                                    | PIN                       | 371  | -        | Gammaproteobacteria | <i>Acinetobacter</i> sp. ACNIH3               | hypothetical protein [Acinetobacter sp. ACNIH3].                        | GCF_002918965.1 |
| WP_146113387.1 | TPR+PIN*→                                | TPR+PIN                   | 1210 | -        | Actinobacteria      | unclassified <i>Arthrobacter</i>              | MULTISPECIES: hypothetical protein [unclassified <i>Arthrobacter</i> ]. | GCF_002975405.1 |
| WP_146162727.1 | TPR+GreAB-C+PIN*→                        | TPR+GreAB-C+PIN           | 1197 | -        | Gammaproteobacteria | <i>Vibrio splendidus</i>                      | hypothetical protein [Vibrio splendidus].                               | GCF_003050425.1 |
| WP_146163497.1 | HetE-N1→ TPR+GreAB-C+PIN*→               | TPR+GreAB-C+PIN           | 1094 | -        | Gammaproteobacteria | <i>Aeromonas veronii</i>                      | hypothetical protein [Aeromonas veronii].                               | GCF_003036425.1 |
| WP_146169670.1 | REase+TPR+GreAB-C+PIN*→                  | REase+TPR+GreAB-C+PIN     | 1355 | -        | Actinobacteria      | <i>Actinoplanes italicus</i>                  | hypothetical protein [Actinoplanes italicus].                           | GCF_016862235.1 |
| WP_146174202.1 | TPR+GreAB-C+PIN*→                        | TPR+GreAB-C+PIN           | 1185 | -        | Alphaproteobacteria | <i>Litoreibacter ponti</i>                    | hypothetical protein [Litoreibacter ponti].                             | GCF_003054285.1 |
| WP_146175347.1 | X+PIN*→                                  | X+PIN                     | 1323 | -        | Actinobacteria      | <i>Conexibacter</i> sp. Seoho-28              | hypothetical protein [Conexibacter sp. Seoho-28].                       | GCF_003044185.1 |
| WP_146181743.1 | HetE-N1→ TPR+GreAB-C+PIN*→               | TPR+GreAB-C+PIN           | 1094 | -        | Gammaproteobacteria | <i>Aeromonas</i> sp. HMWF014                  | hypothetical protein [Aeromonas sp. HMWF014].                           | GCF_003061085.1 |
| WP_146562359.1 | TPR+GreAB-C+PIN*→                        | TPR+GreAB-C+PIN           | 1275 | -        | Planctomycetes      | <i>Posidoniimonas corsicana</i>               | hypothetical protein [Posidoniimonas corsicana].                        | GCF_007859765.1 |
| WP_146571406.1 | REase+TPR+GreAB-C+PIN*→                  | REase+TPR+GreAB-C+PIN     | 1140 | -        | Planctomycetes      | <i>Botrimarina hoheduenensis</i>              | hypothetical protein [Botrimarina hoheduenensis].                       | GCF_007859815.1 |
| WP_146752056.1 | TPR+GreAB-C+PIN*→                        | TPR+GreAB-C+PIN           | 1230 | -        | Actinobacteria      | <i>Microbacterium</i> sp. SMR1                | hypothetical protein [Microbacterium sp. SMR1].                         | GCF_003289625.1 |
| WP_146766012.1 | TPR+GreAB-C+PIN*→                        | TPR+GreAB-C+PIN           | 1147 | -        | Gammaproteobacteria | <i>Pseudomonas</i>                            | MULTISPECIES: hypothetical protein [Pseudomonas].                       | GCF_013522795.1 |
| WP_146779203.1 | TPR+GreAB-C+PIN*→                        | TPR+GreAB-C+PIN           | 1133 | -        | Bacteroidetes       | <i>Flavobacterium psychrolimnae</i>           | hypothetical protein [Flavobacterium psychrolimnae].                    | GCF_003312425.1 |
| WP_146877508.1 | TPR+GreAB-C+PIN*→                        | TPR+GreAB-C+PIN           | 1076 | -        | Actinobacteria      | <i>Actinomadura madurae</i>                   | hypothetical protein [Actinomadura madurae].                            | GCF_900445005.1 |
| WP_146915636.1 | TIR→ TPR+GreAB-C+PIN*→   <-HTH           | TPR+GreAB-C+PIN           | 1255 | -        | Bacteroidetes       | <i>Algoriphagus aquimarinus</i>               | hypothetical protein [Algoriphagus aquimarinus].                        | GCF_007997215.1 |
| WP_146943293.1 | TPR+GreAB-C+PIN*→                        | TPR+GreAB-C+PIN           | 1126 | -        | Bacteroidetes       | <i>Chryseobacterium hagamense</i>             | hypothetical protein [Chryseobacterium hagamense].                      | GCF_007991455.1 |
| WP_146990354.1 | REase+TPR+TPR+GreAB-C+PIN*→              | REase+TPR+TPR+GreAB-C+PIN | 1315 | -        | Alphaproteobacteria | <i>Bradyrhizobium macuxiense</i>              | hypothetical protein [Bradyrhizobium macuxiense].                       | GCF_007993935.1 |
| WP_147282746.1 | HetE-N1→ TPR+GreAB-C+PIN*→               | TPR+GreAB-C+PIN           | 1118 | -        | Betaproteobacteria  | <i>Comamonas</i> sp. AG1104                   | hypothetical protein [Comamonas sp. AG1104].                            | GCF_003350425.1 |
| WP_147289649.1 | HetE-N1→ TPR+GreAB-C+PIN*→               | TPR+GreAB-C+PIN           | 1110 | -        | Gammaproteobacteria | <i>Pantoea agglomerans</i>                    | hypothetical protein [Pantoea agglomerans].                             | GCF_900454505.1 |
| WP_147309007.1 | REase+TPR+GreAB-C+PIN→?→ PIN*→           | PIN                       | 256  | -        | Betaproteobacteria  | <i>Cupriavidus taiwanensis</i>                | hypothetical protein [Cupriavidus taiwanensis].                         | GCF_900249855.1 |
| WP_147316401.1 | TPR+GreAB-C+PIN*→                        | TPR+GreAB-C+PIN           | 1139 | -        | Gammaproteobacteria | <i>Pseudomonas aeruginosa</i>                 | hypothetical protein [Pseudomonas aeruginosa].                          | GCF_003412045.2 |
| WP_147329285.1 | X+PIN*→ HTH→?→?→ HTH→                    | X+PIN                     | 1180 | -        | Firmicutes          | <i>Dorea formicigenerans</i>                  | hypothetical protein [Dorea formicigenerans].                           | GCF_003437395.1 |
| WP_147334977.1 | TM+TM+TPR+PIN*→                          | TM+TM+TPR+PIN             | 1154 | -        | Bacteroidetes       | <i>Phocaeicola coprocola</i>                  | hypothetical protein [Phocaeicola coprocola].                           | GCF_003458565.1 |

| acc            | operon                                                  | architecture              | len  | gen.name | taxend              | species                      | define                                                                              | gca             |
|----------------|---------------------------------------------------------|---------------------------|------|----------|---------------------|------------------------------|-------------------------------------------------------------------------------------|-----------------|
| WP_147344604.1 | Mbetalac→ Trypsin→?→ TPR+PIN*→                          | TPR+PIN                   | 1394 | -        | Firmicutes          | Eubacterium sp. AM49-13BH    | hypothetical protein, partial [Eubacterium sp. AM49-13BH].                          | GCF_003464165.1 |
| WP_147352805.1 | Mbetalac→ Trypsin→ TPR+PIN*→                            | TPR+PIN                   | 1645 | -        | Firmicutes          | Clostridium sp. AM48-13      | hypothetical protein [Clostridium sp. AM48-13].                                     | GCF_003478455.1 |
| WP_147353595.1 | Mbetalac→ Trypsin+TPR+PIN*→                             | Trypsin+TPR+PIN           | 1710 | -        | Firmicutes          | Clostridium sp. AF37-7       | trypsin-like peptidase domain-containing protein, partial [Clostridium sp. AF37-7]. | GCF_003477595.1 |
| WP_147364185.1 | X+PIN*→ HTH→?→?→ HTH→                                   | X+PIN                     | 1179 | -        | Firmicutes          | Dorea formicigenerans        | hypothetical protein [Dorea formicigenerans].                                       | GCF_003475555.1 |
| WP_147402393.1 | TPR+GreAB-C+PIN*→                                       | TPR+GreAB-C+PIN           | 1139 | -        | Gammaproteobacteria | Pseudomonas aeruginosa       | hypothetical protein [Pseudomonas aeruginosa].                                      | GCF_003585235.1 |
| WP_147402585.1 | DOC+HTH→ REase+TOPC→ HetE-N1→ HetE-N1+TPR+GreAB-C+PIN*→ | HetE-N1+TPR+GreAB-C+PIN   | 1123 | -        | Gammaproteobacteria | Pseudomonas aeruginosa       | hypothetical protein [Pseudomonas aeruginosa].                                      | GCF_003585225.1 |
| WP_147432801.1 | REase+TPR+GreAB-C+PIN*→                                 | REase+TPR+GreAB-C+PIN     | 1375 | -        | Actinobacteria      | Catellatospora citrea        | hypothetical protein [Catellatospora citrea].                                       | GCF_016862615.1 |
| WP_147432945.1 | <-TIR<-?  REase+TPR+GreAB-C+PIN*→                       | REase+TPR+GreAB-C+PIN     | 1245 | -        | Actinobacteria      | Catellatospora citrea        | DUF4365 domain-containing protein [Catellatospora citrea].                          | GCF_016862615.1 |
| WP_147450330.1 | REase+TPR+GreAB-C+PIN*→                                 | REase+TPR+GreAB-C+PIN     | 1306 | -        | Deltaproteobacteria | Corallococcus carmarthensis  | hypothetical protein [Corallococcus carmarthensis].                                 | GCF_003611695.1 |
| WP_147453837.1 | TPR+PIN*→ PAIREDC-HTH→                                  | TPR+PIN                   | 1206 | -        | Actinobacteria      | Nocardiopsis sp. Huas11      | hypothetical protein [Nocardiopsis sp. Huas11].                                     | GCF_003634495.1 |
| WP_147481098.1 | TPR+PIN*→                                               | TPR+PIN                   | 1134 | -        | Actinobacteria      | Streptomyces shenzhenensis   | tetratricopeptide repeat protein [Streptomyces shenzhenensis].                      | GCF_003688995.1 |
| WP_147627327.1 | REase+TPR+GreAB-C+PIN→ SIG+HIN-HTH→?→ PIN*→             | PIN                       | 507  | -        | Gammaproteobacteria | Rhodanobacter glycinis       | hypothetical protein [Rhodanobacter glycinis].                                      | GCF_008000795.1 |
| WP_147831354.1 | TPR+GreAB-C+PIN*→                                       | TPR+GreAB-C+PIN           | 1107 | -        | Alphaproteobacteria | Methylobacterium sp. WL19    | hypothetical protein [Methylobacterium sp. WL19].                                   | GCF_008040005.1 |
| WP_147893054.1 | X+PIN*→                                                 | X+PIN                     | 1120 | -        | Actinobacteria      | Microbacterium hatanonis     | hypothetical protein [Microbacterium hatanonis].                                    | GCF_008017415.1 |
| WP_148210527.1 | TPR+GreAB-C+PIN*→                                       | TPR+GreAB-C+PIN           | 1107 | -        | Alphaproteobacteria | Beijerinckia indica          | hypothetical protein [Beijerinckia indica].                                         | GCF_000019845.1 |
| WP_148306266.1 | TPR+GreAB-C+PIN*→                                       | TPR+GreAB-C+PIN           | 1259 | -        | Gemmatimonadetes    | Gemmatirosa kalamazoonesis   | hypothetical protein [Gemmatirosa kalamazoonesis].                                  | GCF_000522985.1 |
| WP_148421250.1 | <-MarR-HTH  ?→?→?→   <-?  ?→ HetE-N1→ TPR+GreAB-C+PIN*→ | TPR+GreAB-C+PIN           | 1117 | -        | Gammaproteobacteria | Enterobacter cloacae         | hypothetical protein [Enterobacter cloacae].                                        | GCF_013376835.1 |
| WP_148564915.1 | REase+TPR+GreAB-C+PIN*→                                 | REase+TPR+GreAB-C+PIN     | 1243 | -        | Gammaproteobacteria | Stenotrophomonas maltophilia | hypothetical protein [Stenotrophomonas maltophilia].                                | GCF_001274595.1 |
| WP_149326491.1 | HetE-N1→ TPR+GreAB-C+PIN*→ PhospholipaseD→              | TPR+GreAB-C+PIN           | 1103 | -        | Gammaproteobacteria | Halomonas sp. L5             | hypothetical protein [Halomonas sp. L5].                                            | GCF_008297955.1 |
| WP_149369557.1 | TPR+PIN*→                                               | TPR+PIN                   | 1189 | -        | Actinobacteria      | Mycolicibacterium sp. P9-64  | hypothetical protein [Mycolicibacterium sp. P9-64].                                 | GCF_008329605.1 |
| WP_150024336.1 | TPR+GreAB-C+PIN*→   <-?  HTH→                           | TPR+GreAB-C+PIN           | 804  | -        | Gammaproteobacteria | Acinetobacter baumannii      | GreA/GreB family elongation factor [Acinetobacter baumannii].                       | GCF_008630895.1 |
| WP_150359822.1 | REase+TPR+GreAB-C+PIN*→                                 | REase+TPR+GreAB-C+PIN     | 1240 | -        | Gammaproteobacteria | Stenotrophomonas maltophilia | hypothetical protein [Stenotrophomonas maltophilia].                                | GCF_008693985.1 |
| WP_150409130.1 | REase+TPR+GreAB-C+PIN*→                                 | REase+TPR+GreAB-C+PIN     | 1284 | -        | Gammaproteobacteria | Xanthomonas sacchari         | GreA/GreB family elongation factor [Xanthomonas sacchari].                          | GCF_008705275.1 |
| WP_150412179.1 | REase+TPR+GreAB-C+PIN*→                                 | REase+TPR+GreAB-C+PIN     | 1314 | -        | Alphaproteobacteria | Sphingobium limneticum       | hypothetical protein [Sphingobium limneticum].                                      | GCF_008710155.1 |
| WP_150784121.1 | REase+TPR+GreAB-C+PIN*→                                 | REase+TPR+GreAB-C+PIN     | 1318 | -        | Gammaproteobacteria | Pseudomonas fluorescens      | DUF4365 domain-containing protein [Pseudomonas fluorescens].                        | GCF_902497995.1 |
| WP_150981548.1 | REase+TPR+GreAB-C+PIN*→                                 | REase+TPR+GreAB-C+PIN     | 1329 | -        | Betaproteobacteria  | Cupriavidus pauculus         | GreA/GreB family elongation factor [Cupriavidus pauculus].                          | GCF_008801835.1 |
| WP_151013632.1 | TPR+PIN*→                                               | TPR+PIN                   | 1145 | -        | Actinobacteria      | Micromonospora aurantiaca    | hypothetical protein [Micromonospora aurantiaca].                                   | GCF_008806405.1 |
| WP_151024479.1 | REase+TPR+GreAB-C+PIN*→                                 | REase+TPR+GreAB-C+PIN     | 1499 | -        | Betaproteobacteria  | Castellaniella defragrans    | hypothetical protein [Castellaniella defragrans].                                   | GCF_014203015.1 |
| WP_151868021.1 | TPR+GreAB-C+PIN*→                                       | TPR+GreAB-C+PIN           | 463  | -        | Gammaproteobacteria | Acinetobacter soli           | hypothetical protein, partial [Acinetobacter soli].                                 | GCF_009013695.1 |
| WP_152091999.1 | HetE-N1→ TPR+GreAB-C+PIN*→                              | TPR+GreAB-C+PIN           | 1107 | -        | Gammaproteobacteria | Pseudomonas sp. KUIN-1       | hypothetical protein [Pseudomonas sp. KUIN-1].                                      | GCF_009176725.1 |
| WP_152099374.1 | TPR+GreAB-C+PIN*→                                       | TPR+GreAB-C+PIN           | 1188 | -        | Planctomycetes      | Lacipirellula parvula        | tetratricopeptide repeat protein [Lacipirellula parvula].                           | GCF_009177095.1 |
| WP_152217660.1 | REase+TPR+TPR+GreAB-C+PIN*→                             | REase+TPR+TPR+GreAB-C+PIN | 1333 | -        | Alphaproteobacteria | Parvibaculum sedimenti       | hypothetical protein [Parvibaculum sedimenti].                                      | GCF_009184905.1 |
| WP_152508433.1 | TPR+GreAB-C+PIN*→                                       | TPR+GreAB-C+PIN           | 1208 | -        | Alphaproteobacteria | unclassified Labrenzia       | MULTISPECIES: hypothetical protein [unclassified Labrenzia].                        | GCF_009363315.1 |
| WP_152533063.1 | REase+TPR+GreAB-C+PIN*→                                 | REase+TPR+GreAB-C+PIN     | 1484 | -        | Gammaproteobacteria | Pseudomonas syringae         | hypothetical protein [Pseudomonas syringae].                                        | GCF_000452465.1 |
| WP_152541917.1 | TPR+GreAB-C+PIN*→                                       | TPR+GreAB-C+PIN           | 529  | -        | Bacteroidetes       | Saccharicrinis fermentans    | hypothetical protein [Saccharicrinis fermentans].                                   | GCF_000583675.1 |
| WP_152640028.1 | TPR+GreAB-C+PIN*→                                       | TPR+GreAB-C+PIN           | 395  | -        | Firmicutes          | Blautia obeum                | hypothetical protein [Blautia obeum].                                               | GCF_003463085.1 |

| acc            | operon                                                  | architecture                 | len  | gen.name | taxend              | species                         | define                                                                       | gca             |
|----------------|---------------------------------------------------------|------------------------------|------|----------|---------------------|---------------------------------|------------------------------------------------------------------------------|-----------------|
| WP_152648143.1 | REase+TPR+TPR+GreAB-C+PIN*→                             | REase+TPR+TPR+GreAB-C+PIN    | 1321 | -        | Alphaproteobacteria | Bradyrhizobium elkanii          | hypothetical protein [Bradyrhizobium elkanii].                               | GCF_000878305.1 |
| WP_152803033.1 | REase+TPR+GreAB-C+PIN*→   <-HTH                         | REase+TPR+GreAB-C+PIN        | 1328 | -        | Betaproteobacteria  | Rugamonas sp. FT103W            | hypothetical protein [Rugamonas sp. FT103W].                                 | GCF_009380165.1 |
| WP_152993715.1 | TPR+GreAB-C+PIN*→                                       | TPR+GreAB-C+PIN              | 677  | -        | Gammaproteobacteria | Pseudomonas aeruginosa          | hypothetical protein [Pseudomonas aeruginosa].                               | GCF_001451965.1 |
| WP_153001774.1 | PIN*→                                                   | PIN                          | 483  | -        | Actinobacteria      | Curtobacterium oceanosedimentum | hypothetical protein [Curtobacterium oceanosedimentum].                      | GCF_001476135.1 |
| WP_153041348.1 | TPR+GreAB-C+PIN*→                                       | TPR+GreAB-C+PIN              | 1322 | -        | Alphaproteobacteria | Pseudovibrio sp. Ad5            | hypothetical protein [Pseudovibrio sp. Ad5].                                 | GCF_001623095.1 |
| WP_153065368.1 | REase→ TPR+GreAB-C+PIN*→                                | TPR+GreAB-C+PIN              | 1111 | -        | Gammaproteobacteria | Xanthomonas arboricola          | hypothetical protein [Xanthomonas arboricola].                               | GCF_003352905.1 |
| WP_153226839.1 | TPR+PIN*→                                               | TPR+PIN                      | 1140 | -        | Actinobacteria      | Mycobacteroides salmoniphilum   | hypothetical protein [Mycobacteroides salmoniphilum].                        | GCF_004366855.1 |
| WP_153278476.1 | TM+TPR+PIN*→                                            | TM+TPR+PIN                   | 1138 | -        | Actinobacteria      | Saccharothrix syringae          | hypothetical protein [Saccharothrix syringae].                               | GCF_009498035.1 |
| WP_153574636.1 | TPR+GreAB-C+PIN*→                                       | TPR+GreAB-C+PIN              | 1139 | -        | Gammaproteobacteria | Pseudomonas aeruginosa          | hypothetical protein [Pseudomonas aeruginosa].                               | GCF_000791765.1 |
| WP_153576067.1 | TPR+GreAB-C+PIN*→                                       | TPR+GreAB-C+PIN              | 1170 | -        | Gammaproteobacteria | Pseudomonas aeruginosa          | hypothetical protein [Pseudomonas aeruginosa].                               | GCF_000795585.1 |
| WP_153576415.1 | TPR+GreAB-C+PIN*→                                       | TPR+GreAB-C+PIN              | 1158 | -        | Gammaproteobacteria | Pseudomonas aeruginosa          | hypothetical protein [Pseudomonas aeruginosa].                               | GCF_000796465.1 |
| WP_153786096.1 | TPR+GreAB-C+PIN*→                                       | TPR+GreAB-C+PIN              | 1139 | -        | Gammaproteobacteria | Pseudomonas sp. EMN2            | hypothetical protein [Pseudomonas sp. EMN2].                                 | GCF_009650555.1 |
| WP_154691510.1 | REase+TPR+GreAB-C+PIN*→                                 | REase+TPR+GreAB-C+PIN        | 1325 | -        | Alphaproteobacteria | Novosphingobium sp. Gsoil 351   | hypothetical protein [Novosphingobium sp. Gsoil 351].                        | GCF_009707465.1 |
| WP_154808640.1 | TPR+GreAB-C+PIN*→   <-?<-?<-?<-?  ?→?→ Cas_Cas1→        | TPR+GreAB-C+PIN              | 1207 | -        | Euryarchaeota       | Methanobolus vulcani            | GreA/GreB family elongation factor [Methanobolus vulcani].                   | GCF_006546655.1 |
| WP_154898518.1 | TPR+GreAB-C+PIN*→                                       | TPR+GreAB-C+PIN              | 970  | -        | Planctomycetes      | Gimesia maris                   | GreA/GreB family elongation factor [Gimesia maris].                          | GCF_007747015.1 |
| WP_155001003.1 | TPR+GreAB-C+PIN*→                                       | TPR+GreAB-C+PIN              | 1157 | -        | Gammaproteobacteria | Pseudomonas fluorescens         | hypothetical protein [Pseudomonas fluorescens].                              | GCF_902497965.1 |
| WP_155247385.1 | REase+TPR+GreAB-C+PIN*→                                 | REase+TPR+GreAB-C+PIN        | 1356 | -        | Actinobacteria      | Salinispora arenicola           | hypothetical protein [Salinispora arenicola].                                | GCF_000375205.1 |
| WP_155347963.1 | REase+TPR+GreAB-C+PIN*→                                 | REase+TPR+GreAB-C+PIN        | 1228 | -        | Actinobacteria      | Acrocarpospora pleiomorpha      | DUF4365 domain-containing protein [Acrocarpospora pleiomorpha].              | GCF_009687885.1 |
| WP_155468027.1 | REase+TPR+GreAB-C+PIN*→                                 | REase+TPR+GreAB-C+PIN        | 1410 | -        | Betaproteobacteria  | Duganella radialis              | DUF4365 domain-containing protein [Duganella radialis].                      | GCF_009720825.1 |
| WP_155543363.1 | REase+TPR+GreAB-C+PIN*→                                 | REase+TPR+GreAB-C+PIN        | 1179 | -        | Actinobacteria      | Amycolatopsis sp. A23           | DUF4365 domain-containing protein [Amycolatopsis sp. A23].                   | GCF_902497555.1 |
| WP_155546438.1 | REase+TPR+GreAB-C+PIN*→                                 | REase+TPR+GreAB-C+PIN        | 1244 | -        | Actinobacteria      | Amycolatopsis sp. A23           | DUF4365 domain-containing protein [Amycolatopsis sp. A23].                   | GCF_902497555.1 |
| WP_155620995.1 | TPR+PIN*→                                               | TPR+PIN                      | 1179 | -        | Firmicutes          | Paenibacillus macerans          | hypothetical protein [Paenibacillus macerans].                               | GCF_009725145.1 |
| WP_155672395.1 | HetE-N1→ TPR+GreAB-C+PIN*→                              | TPR+GreAB-C+PIN              | 1088 | -        | Gammaproteobacteria | Aliivibrio fischeri             | hypothetical protein [Aliivibrio fischeri].                                  | GCF_009727805.1 |
| WP_155681246.1 | DOC+HTH→ REase+TOPC→ HetE-N1→ HetE-N1+TPR+GreAB-C+PIN*→ | HetE-N1+TPR+GreAB-C+PIN      | 1123 | -        | Gammaproteobacteria | Pseudomonas aeruginosa          | hypothetical protein [Pseudomonas aeruginosa].                               | GCF_009727245.1 |
| WP_155728442.1 | HetE-N1→ MNS-Npun2340+TPR+GreAB-C+PIN*→                 | MNS-Npun2340+TPR+GreAB-C+PIN | 1094 | -        | Gammaproteobacteria | Aeromonas veronii               | hypothetical protein [Aeromonas veronii].                                    | GCF_001593245.1 |
| WP_155754272.1 | REase+TPR+GreAB-C+PIN*→                                 | REase+TPR+GreAB-C+PIN        | 1265 | -        | Betaproteobacteria  | Burkholderia vietnamiensis      | hypothetical protein [Burkholderia vietnamiensis].                           | GCF_001528565.1 |
| WP_155849001.1 | TPR+PIN*→                                               | TPR+PIN                      | 1211 | -        | Actinobacteria      | Amycolatopsis vancoresmycina    | hypothetical protein [Amycolatopsis vancoresmycina].                         | GCF_000388135.1 |
| WP_155854387.1 | TPR+PIN*→                                               | TPR+PIN                      | 1219 | -        | Actinobacteria      | Arthrobacter sp. MA-N2          | hypothetical protein [Arthrobacter sp. MA-N2].                               | GCF_000517125.1 |
| WP_155858633.1 | REase+TPR+GreAB-C+PIN*→                                 | REase+TPR+GreAB-C+PIN        | 1245 | -        | Gammaproteobacteria | Acinetobacter soli              | hypothetical protein [Acinetobacter soli].                                   | GCF_001953195.1 |
| WP_155950759.1 | HetE-N1→ TPR+TPR+GreAB-C+PIN*→                          | TPR+TPR+GreAB-C+PIN          | 1108 | -        | Gammaproteobacteria | Pseudomonas taiwanensis         | hypothetical protein [Pseudomonas taiwanensis].                              | GCF_000425785.1 |
| WP_155952204.1 | REase+TPR+GreAB-C+PIN*→                                 | REase+TPR+GreAB-C+PIN        | 1443 | -        | Gammaproteobacteria | Pseudomonas sp. CHM02           | hypothetical protein [Pseudomonas sp. CHM02].                                | GCF_000612585.1 |
| WP_155956985.1 | HTH+PNPase+TPR+GreAB-C+PIN*→                            | HTH+PNPase+TPR+GreAB-C+PIN   | 1520 | -        | Actinobacteria      | Rhodococcus sp. UNC23MFCrub1.1  | helix-turn-helix domain-containing protein [Rhodococcus sp. UNC23MFCrub1.1]. | GCF_000686025.1 |
| WP_156093738.1 | REase+TPR+GreAB-C+PIN*→                                 | REase+TPR+GreAB-C+PIN        | 1179 | -        | Actinobacteria      | Lentzea aerocolonigenes         | DUF4365 domain-containing protein [Lentzea aerocolonigenes].                 | GCF_000974445.1 |
| WP_156124401.1 | HetE-N1→ HetE-N1+TPR+GreAB-C+PIN*→                      | HetE-N1+TPR+GreAB-C+PIN      | 1122 | -        | Betaproteobacteria  | Achromobacter sp. RTa           | hypothetical protein [Achromobacter sp. RTa].                                | GCF_000757485.1 |
| WP_156177573.1 | REase+TPR+GreAB-C+PIN*→                                 | REase+TPR+GreAB-C+PIN        | 1471 | -        | Gammaproteobacteria | Pseudomonas sp. CCOS 191        | hypothetical protein [Pseudomonas sp. CCOS 191].                             | GCF_001007005.1 |
| WP_156289500.1 | TPR+PIN*→                                               | TPR+PIN                      | 1076 | -        | Firmicutes          | Oceanobacillus salinisoli       | hypothetical protein [Oceanobacillus salinisoli].                            | GCF_009733865.1 |
| WP_156340841.1 | REase+TPR+GreAB-C+PIN*→                                 | REase+TPR+GreAB-C+PIN        | 1470 | -        | Gammaproteobacteria | Pseudomonas sp. NBRC 111124     | hypothetical protein [Pseudomonas sp. NBRC 111124].                          | GCF_001320245.1 |

| acc            | operon                                              | architecture              | len  | gen.name | taxend              | species                             | define                                                            | gca             |
|----------------|-----------------------------------------------------|---------------------------|------|----------|---------------------|-------------------------------------|-------------------------------------------------------------------|-----------------|
| WP_156343172.1 | REase+TPR+GreAB-C+PIN*→                             | REase+TPR+GreAB-C+PIN     | 1368 | -        | Gammaproteobacteria | <i>Pseudomonas</i> sp. NBRC 111134  | hypothetical protein [Pseudomonas sp. NBRC 111134].               | GCF_001320655.1 |
| WP_156369768.1 | TPR+PIN*→                                           | TPR+PIN                   | 1065 | -        | Actinobacteria      | <i>Arthrobacter</i> sp. Leaf145     | hypothetical protein [Arthrobacter sp. Leaf145].                  | GCF_001423565.1 |
| WP_156457128.1 | TPR+GreAB-C+PIN*→                                   | TPR+GreAB-C+PIN           | 1119 | -        | Alphaproteobacteria | <i>Bradyrhizobium</i> sp. CCH5-F6   | hypothetical protein [Bradyrhizobium sp. CCH5-F6].                | GCF_001556045.1 |
| WP_156523151.1 | REase+TPR+GreAB-C+PIN*→                             | REase+TPR+GreAB-C+PIN     | 1289 | -        | Betaproteobacteria  | <i>Bordetella</i> ansorpii          | hypothetical protein [Bordetella ansorpii].                       | GCF_900078315.1 |
| WP_156681909.1 | -                                                   | -                         | 1775 | -        | Actinobacteria      | <i>Rhodococcus</i> sp. SC4          | helix-turn-helix domain-containing protein [Rhodococcus sp. SC4]. | -               |
| WP_156749419.1 | TPR+PIN*→                                           | TPR+PIN                   | 1166 | -        | Actinobacteria      | <i>Mycobacterium</i> sp. E1747      | hypothetical protein [Mycobacterium sp. E1747].                   | GCF_001667775.1 |
| WP_156792330.1 | HetE-N1→ TPR+GreAB-C+PIN*→                          | TPR+GreAB-C+PIN           | 1110 | -        | Deltaproteobacteria | <i>Desulfotalea psychrophila</i>    | hypothetical protein [Desulfotalea psychrophila].                 | GCF_000025945.1 |
| WP_156831299.1 | REase+TPR+GreAB-C+PIN*→                             | REase+TPR+GreAB-C+PIN     | 1304 | -        | Gammaproteobacteria | <i>Arhodomonas aquaeolei</i>        | hypothetical protein [Arhodomonas aquaeolei].                     | GCF_000374645.1 |
| WP_156924526.1 | REase+TPR+GreAB-C+PIN*→                             | REase+TPR+GreAB-C+PIN     | 1326 | -        | Betaproteobacteria  | <i>Derxia gummosa</i>               | hypothetical protein [Derxia gummosa].                            | GCF_000482785.1 |
| WP_156945361.1 | REase+TPR+GreAB-C+PIN*→                             | REase+TPR+GreAB-C+PIN     | 1305 | -        | Alphaproteobacteria | <i>Hyphomonas johnsonii</i>         | hypothetical protein [Hyphomonas johnsonii].                      | GCF_000685275.1 |
| WP_156971043.1 | TPR+GreAB-C+PIN*→                                   | TPR+GreAB-C+PIN           | 1141 | -        | Alphaproteobacteria | <i>Beijerinckia mobilis</i>         | tetratricopeptide repeat protein [Beijerinckia mobilis].          | GCF_000745425.1 |
| WP_157119081.1 | REase+TPR+GreAB-C+PIN*→                             | REase+TPR+GreAB-C+PIN     | 1521 | -        | Betaproteobacteria  | <i>Azohydromonas lata</i>           | hypothetical protein [Azohydromonas lata].                        | GCF_001571085.1 |
| WP_157228354.1 | TPR+PIN*→                                           | TPR+PIN                   | 1070 | -        | Actinobacteria      | <i>Gordonia amicalis</i>            | hypothetical protein [Gordonia amicalis].                         | GCF_000332995.1 |
| WP_157237724.1 | TPR+GreAB-C+PIN*→                                   | TPR+GreAB-C+PIN           | 801  | -        | Deltaproteobacteria | <i>Desulfobacter curvatus</i>       | hypothetical protein [Desulfobacter curvatus].                    | GCF_000373985.1 |
| WP_157376943.1 | REase+TPR+GreAB-C+PIN*→                             | REase+TPR+GreAB-C+PIN     | 1354 | -        | Betaproteobacteria  | <i>Burkholderia ubonensis</i>       | hypothetical protein [Burkholderia ubonensis].                    | GCF_001523425.1 |
| WP_157516442.1 | TPR+PIN*→                                           | TPR+PIN                   | 1239 | -        | Actinobacteria      | <i>Oerskovia enterophila</i>        | hypothetical protein [Oerskovia enterophila].                     | GCF_001624335.1 |
| WP_157553798.1 | X+PIN*→?→ Calcineurin→                              | X+PIN                     | 1140 | -        | Actinobacteria      | <i>Microbacterium hominis</i>       | hypothetical protein [Microbacterium hominis].                    | GCF_001592125.1 |
| WP_157561005.1 | TPR+PIN*→                                           | TPR+PIN                   | 758  | -        | Actinobacteria      | <i>Humibacter albus</i>             | hypothetical protein [Humibacter albus].                          | GCF_000421825.1 |
| WP_157621026.1 | HetE-N1→ TPR+GreAB-C+PIN*→                          | TPR+GreAB-C+PIN           | 1092 | -        | Gammaproteobacteria | <i>Vibrio</i> sp. HENC-03           | hypothetical protein [Vibrio sp. HENC-03].                        | GCF_000305755.2 |
| WP_157678465.1 | REase+TPR+GreAB-C+PIN*→                             | REase+TPR+GreAB-C+PIN     | 1297 | -        | Alphaproteobacteria | <i>Mesorhizobium</i> sp. WSM1497    | hypothetical protein [Mesorhizobium sp. WSM1497].                 | GCF_001672455.2 |
| WP_157721532.1 | REase+TPR+GreAB-C+PIN*→                             | REase+TPR+GreAB-C+PIN     | 1240 | -        | Gammaproteobacteria | <i>Stenotrophomonas</i> sp. WZN-1   | hypothetical protein [Stenotrophomonas sp. WZN-1].                | GCF_002192255.1 |
| WP_157768703.1 | REase+TPR+GreAB-C+PIN*→                             | REase+TPR+GreAB-C+PIN     | 1380 | -        | Betaproteobacteria  | <i>Acidovorax avenae</i>            | hypothetical protein [Acidovorax avenae].                         | GCF_000176855.2 |
| WP_157788679.1 | REase+TPR+GreAB-C+PIN*→                             | REase+TPR+GreAB-C+PIN     | 1382 | -        | Gammaproteobacteria | <i>Pseudomonas fluorescens</i>      | GreA/GreB family elongation factor [Pseudomonas fluorescens].     | GCF_000308175.1 |
| WP_157822505.1 | TPR+GreAB-C+PIN*→                                   | TPR+GreAB-C+PIN           | 769  | -        | Gammaproteobacteria | <i>Psychromonas</i> sp. Urea-02u-13 | hypothetical protein, partial [Psychromonas sp. Urea-02u-13].     | GCF_002835995.1 |
| WP_157852789.1 | TPR+PIN*→                                           | TPR+PIN                   | 1134 | -        | Actinobacteria      | <i>Streptomyces iakyrus</i>         | hypothetical protein [Streptomyces iakyrus].                      | GCF_000717055.1 |
| WP_157874592.1 | REase+TPR+TPR+GreAB-C+PIN*→                         | REase+TPR+TPR+GreAB-C+PIN | 1330 | -        | Actinobacteria      | <i>Streptomyces</i> sp. AcH 505     | hypothetical protein [Streptomyces sp. AcH 505].                  | GCF_000818175.1 |
| WP_157937504.1 | TPR+GreAB-C+PIN*→                                   | TPR+GreAB-C+PIN           | 964  | -        | Gammaproteobacteria | <i>Vibrio splendidus</i>            | hypothetical protein, partial [Vibrio splendidus].                | GCF_002874795.1 |
| WP_157972098.1 | TPR+GreAB-C+PIN*→                                   | TPR+GreAB-C+PIN           | 1234 | -        | Bacteroidetes       | <i>Negadavirga</i> sp. SW125        | hypothetical protein [Negadavirga sp. SW125].                     | GCF_003347495.1 |
| WP_158764527.1 | TPR+GreAB-C+PIN*→                                   | TPR+GreAB-C+PIN           | 761  | -        | Alphaproteobacteria | <i>Terricaulis silvestris</i>       | hypothetical protein [Terricaulis silvestris].                    | GCF_009792355.1 |
| WP_158793614.1 | REase+TPR+GreAB-C+PIN*→                             | REase+TPR+GreAB-C+PIN     | 1358 | -        | Acidobacteria       | <i>Granulicella</i> sp. L60         | hypothetical protein [Granulicella sp. L60].                      | GCF_009765825.1 |
| WP_158941358.1 | REase+TPR+GreAB-C+PIN*→                             | REase+TPR+GreAB-C+PIN     | 1279 | -        | Acidobacteria       | <i>Granulicella</i> sp. S190        | hypothetical protein [Granulicella sp. S190].                     | GCF_009766095.1 |
| WP_159057317.1 | TPR+PIN*→                                           | TPR+PIN                   | 1196 | -        | Actinobacteria      | <i>Streptomyces scabiei</i>         | hypothetical protein [Streptomyces scabiei].                      | GCF_001550225.1 |
| WP_159073521.1 | TPR+PIN*→                                           | TPR+PIN                   | 1075 | -        | Actinobacteria      | <i>Streptomyces</i> sp. RTd22       | hypothetical protein [Streptomyces sp. RTd22].                    | GCF_001650215.1 |
| WP_159104186.1 | TPR+PIN*→                                           | TPR+PIN                   | 1211 | -        | Actinobacteria      | <i>Streptomyces</i> sp. CdTB01      | hypothetical protein [Streptomyces sp. CdTB01].                   | GCF_001484565.1 |
| WP_159389385.1 | REase+TPR+GreAB-C+PIN*→                             | REase+TPR+GreAB-C+PIN     | 1423 | -        | Gammaproteobacteria | <i>Pseudomonas</i> sp. R32          | hypothetical protein [Pseudomonas sp. R32].                       | GCF_009866705.1 |
| WP_159401920.1 | TPR+PIN*→                                           | TPR+PIN                   | 1075 | -        | Actinobacteria      | <i>Streptomyces hygrosopicus</i>    | hypothetical protein [Streptomyces hygrosopicus].                 | GCF_001705785.1 |
| WP_159477578.1 | Mbetalac→ Trypsin+TPR+GreAB-C+PIN*→                 | Trypsin+TPR+GreAB-C+PIN   | 1359 | -        | Bacteroidetes       | <i>Dyadobacter</i> sp. 3J3          | hypothetical protein [Dyadobacter sp. 3J3].                       | GCF_009801115.1 |
| WP_159617138.1 | PIN*→                                               | PIN                       | 499  | -        | Actinobacteria      | <i>Arthrobacter zhaoguopingii</i>   | hypothetical protein [Arthrobacter zhaoguopingii].                | GCF_009828605.1 |
| WP_159719775.1 | TPR+PIN*→                                           | TPR+PIN                   | 1170 | -        | Firmicutes          | <i>Anoxybacillus</i> sp. PDR2       | hypothetical protein [Anoxybacillus sp. PDR2].                    | GCF_009834045.1 |
| WP_159964006.1 | REase+TPR+GreAB-C+PIN*→                             | REase+TPR+GreAB-C+PIN     | 1113 | -        | Alphaproteobacteria | <i>Profundibacterium mesophilum</i> | hypothetical protein [Profundibacterium mesophilum].              | GCF_009835145.1 |
| WP_160086901.1 | BTLCP+SFI-helicase+REase→?→ REase+TPR+GreAB-C+PIN*→ | REase+TPR+GreAB-C+PIN     | 1492 | -        | Gammaproteobacteria | <i>Pseudomonas</i> sp. 9AZ          | GreA/GreB family elongation factor [Pseudomonas sp. 9AZ].         | GCF_902506525.1 |



| acc            | operon                                                    | architecture             | len  | gen.name | taxend              | species                          | define                                                                    | gca             |
|----------------|-----------------------------------------------------------|--------------------------|------|----------|---------------------|----------------------------------|---------------------------------------------------------------------------|-----------------|
| WP_160308988.1 | TPR+GreAB-C+PIN*→                                         | TPR+GreAB-C+PIN          | 1249 | -        | Deltaproteobacteria | Anaeromyxobacter sp. PSR-1       | GreA/GreB family elongation factor [Anaeromyxobacter sp. PSR-1].          | GCF_000964525.1 |
| WP_160382728.1 | REase+TPR+GreAB-C+PIN*→                                   | REase+TPR+GreAB-C+PIN    | 1329 | -        | Alphaproteobacteria | Pseudoceanicola pacificus        | hypothetical protein [Pseudoceanicola pacificus].                         | GCF_009789075.1 |
| WP_160512238.1 | HetE-N1→ TPR+GreAB-C+PIN*→                                | TPR+GreAB-C+PIN          | 1094 | -        | Gammaproteobacteria | Escherichia coli                 | hypothetical protein [Escherichia coli].                                  | GCF_009820085.1 |
| WP_160657313.1 | HetE-N1→ TPR+GreAB-C+PIN*→                                | TPR+GreAB-C+PIN          | 1114 | -        | Gammaproteobacteria | Photobacterium alginatilyticum   | hypothetical protein [Photobacterium alginatilyticum].                    | GCF_009910675.1 |
| WP_160663512.1 | TPR+PIN*→                                                 | TPR+PIN                  | 1180 | -        | Actinobacteria      | Pseudarthrobacter sp. ATCC 49987 | hypothetical protein [Pseudarthrobacter sp. ATCC 49987].                  | GCF_009928425.1 |
| WP_160778164.1 | REase→ PSE→ REase+TPR+GreAB-C+PIN*→                       | REase+TPR+GreAB-C+PIN    | 1252 | -        | Alphaproteobacteria | Parerythrobacter jejuensis       | hypothetical protein [Parerythrobacter jejuensis].                        | GCF_009827995.1 |
| WP_160856107.1 | REase+TPR+GreAB-C+PIN*→                                   | REase+TPR+GreAB-C+PIN    | 1263 | -        | Betaproteobacteria  | Delftia sp. CH05                 | hypothetical protein [Delftia sp. CH05].                                  | GCF_009827015.1 |
| WP_160933674.1 | REase+TPR+GreAB-C+PIN*→                                   | REase+TPR+GreAB-C+PIN    | 1351 | -        | Betaproteobacteria  | unclassified Burkholderia        | MULTISPECIES: hypothetical protein [unclassified Burkholderia].           | GCF_009826925.1 |
| WP_161036960.1 | REase+TPR+GreAB-C+PIN*→                                   | REase+TPR+GreAB-C+PIN    | 1075 | -        | Betaproteobacteria  | Duganella fentianensis           | hypothetical protein [Duganella fentianensis].                            | GCF_009857835.1 |
| WP_161077003.1 | REase+TPR+GreAB-C+PIN*→                                   | REase+TPR+GreAB-C+PIN    | 1292 | -        | Betaproteobacteria  | Duganella sp. CY15W              | restriction endonuclease [Duganella sp. CY15W].                           | GCF_009857555.1 |
| WP_161352699.1 | REase+TPR+GreAB-C+PIN*→                                   | REase+TPR+GreAB-C+PIN    | 1351 | -        | Alphaproteobacteria | Maritimibacter sp. DP07          | hypothetical protein [Maritimibacter sp. DP07].                           | GCF_009882975.1 |
| WP_161505253.1 | TPR+PIN*→?→?→   <-TIR                                     | TPR+PIN                  | 1268 | -        | Gammaproteobacteria | Legionella pneumophila           | hypothetical protein [Legionella pneumophila].                            | GCF_009933055.1 |
| WP_161571911.1 | HetE-N1→ TPR+GreAB-C+PIN*→                                | TPR+GreAB-C+PIN          | 1117 | -        | Gammaproteobacteria | Cronobacter malonaticus          | hypothetical protein [Cronobacter malonaticus].                           | GCF_009938405.1 |
| WP_161629377.1 | TPR+GreAB-C+PIN*→                                         | TPR+GreAB-C+PIN          | 488  | -        | Gammaproteobacteria | Marinobacter sp. EVN1            | hypothetical protein, partial [Marinobacter sp. EVN1].                    | GCF_000475375.1 |
| WP_161722347.1 | TPR+GreAB-C+PIN*→                                         | TPR+GreAB-C+PIN          | 1135 | -        | Alphaproteobacteria | unclassified Microvirga          | MULTISPECIES: tetratricopeptide repeat protein [unclassified Microvirga]. | GCF_009910725.1 |
| WP_161796830.1 | REase+TPR+GreAB-C+PIN*→                                   | REase+TPR+GreAB-C+PIN    | 1210 | -        | Alphaproteobacteria | Devosia soli                     | GreA/GreB family elongation factor [Devosia soli].                        | GCF_000970455.1 |
| WP_161897930.1 | HetE-N1→ TPR+GreAB-C+PIN*→                                | TPR+GreAB-C+PIN          | 1110 | -        | Gammaproteobacteria | Pseudomonas sp. MY50             | hypothetical protein [Pseudomonas sp. MY50].                              | GCF_009932725.1 |
| WP_161916726.1 | X+PIN*→                                                   | X+PIN                    | 1235 | -        | Actinobacteria      | Cellulomonas sp. APG4            | hypothetical protein [Cellulomonas sp. APG4].                             | GCF_009996735.1 |
| WP_161984907.1 | HTH→ HetE-N1→ HetE-N1+GreAB-C+PIN*→                       | HetE-N1+GreAB-C+PIN      | 1077 | -        | Gammaproteobacteria | Acinetobacter haemolyticus       | hypothetical protein [Acinetobacter haemolyticus].                        | GCF_010014695.1 |
| WP_162386033.1 | Mbetalac→ Trypsin+TPR+GreAB-C+PIN*→                       | Trypsin+TPR+GreAB-C+PIN  | 1366 | -        | Bacteroidetes       | Spirosoma endbachense            | hypothetical protein [Spirosoma endbachense].                             | GCF_010233585.1 |
| WP_162486659.1 | REase+TPR+GreAB-C+PIN*→   <-HTH+HTH                       | REase+TPR+GreAB-C+PIN    | 1334 | -        | Betaproteobacteria  | Burkholderia pseudomallei        | hypothetical protein [Burkholderia pseudomallei].                         | GCF_000011545.1 |
| WP_162599154.1 | HetE-N1→ TPR+GreAB-C+PIN*→                                | TPR+GreAB-C+PIN          | 1027 | -        | Gammaproteobacteria | Shewanella algidipiscicola       | hypothetical protein [Shewanella algidipiscicola].                        | GCF_900380485.1 |
| WP_162599389.1 | TPR+GreAB-C+PIN*→                                         | TPR+GreAB-C+PIN          | 1158 | -        | Gammaproteobacteria | Pseudomonas aeruginosa           | hypothetical protein [Pseudomonas aeruginosa].                            | GCF_900406905.1 |
| WP_162672520.1 | HTH→ GT4+HEPN+TPR+GreAB-C+PIN*→                           | GT4+HEPN+TPR+GreAB-C+PIN | 1685 | -        | Planctomycetes      | Gemmata massiliana               | glycosyltransferase [Gemmata massiliana].                                 | GCF_901538265.1 |
| WP_162916214.1 | PIN*→                                                     | PIN                      | 348  | -        | Betaproteobacteria  | Burkholderia sp. PAMC 26561      | hypothetical protein [Burkholderia sp. PAMC 26561].                       | GCF_001557535.2 |
| WP_162940198.1 | X+PIN*→                                                   | X+PIN                    | 1169 | -        | Actinobacteria      | Gryllotalpica protaetiae         | hypothetical protein [Gryllotalpica protaetiae].                          | GCF_003627055.1 |
| WP_162960625.1 | DOC+HTH→ REase+TOPC→?→ HetE-N1→ HetE-N1+TPR+GreAB-C+PIN*→ | HetE-N1+TPR+GreAB-C+PIN  | 770  | -        | Gammaproteobacteria | Pseudomonas aeruginosa           | hypothetical protein, partial [Pseudomonas aeruginosa].                   | GCF_003630455.1 |
| WP_163210080.1 | TM+TM+TPR+PIN*→                                           | TM+TM+TPR+PIN            | 1195 | -        | Bacteroidetes       | Bacteroides sp. 519              | hypothetical protein [Bacteroides sp. 519].                               | GCF_010500955.1 |
| WP_163325035.1 | TPR+GreAB-C+PIN*→                                         | TPR+GreAB-C+PIN          | 1227 | -        | Bacteroidetes       | Draconibacterium sp. GM2-18      | hypothetical protein [Draconibacterium sp. GM2-18].                       | GCF_010586825.1 |
| WP_163385713.1 | TPR+GreAB-C+PIN*→                                         | TPR+GreAB-C+PIN          | 509  | -        | Gammaproteobacteria | Enterobacter hormaechei          | hypothetical protein, partial [Enterobacter hormaechei].                  | GCF_011006815.1 |
| WP_163511264.1 | REase+TPR+GreAB-C+PIN*→                                   | REase+TPR+GreAB-C+PIN    | 1231 | -        | Actinobacteria      | Fodinicola acaciae               | DUF4365 domain-containing protein [Fodinicola acaciae].                   | GCF_010993745.1 |
| WP_163806192.1 | TPR+PIN*→                                                 | TPR+PIN                  | 1223 | -        | Actinobacteria      | Mycolicibacterium anyangense     | hypothetical protein [Mycolicibacterium anyangense].                      | GCF_010731855.1 |
| WP_163887020.1 | REase+TPR+GreAB-C+PIN*→                                   | REase+TPR+GreAB-C+PIN    | 1290 | -        | Alphaproteobacteria | Pseudoruegeria sp. M32A2M        | tetratricopeptide repeat protein [Pseudoruegeria sp. M32A2M].             | GCF_010374725.1 |
| WP_164141894.1 | TPR+PIN*→                                                 | TPR+PIN                  | 1215 | -        | Actinobacteria      | Streptomyces coelicoflavus       | hypothetical protein [Streptomyces coelicoflavus].                        | GCF_010548435.1 |
| WP_164363703.1 | TPR+PIN*→                                                 | TPR+PIN                  | 1135 | -        | Actinobacteria      | Streptomyces griseus             | hypothetical protein [Streptomyces griseus].                              | GCF_010548565.1 |
| WP_164366948.1 | TPR+PIN*→                                                 | TPR+PIN                  | 1215 | -        | Actinobacteria      | Streptomyces diastaticus         | hypothetical protein [Streptomyces diastaticus].                          | GCF_010548605.1 |
| WP_164922417.1 | TRD+TRD→?→?→ REase+SNF2→?→ TPR+GreAB-C+PIN*→              | TPR+GreAB-C+PIN          | 1273 | -        | Planctomycetes      | Rhodopirellula baltica           | hypothetical protein [Rhodopirellula baltica].                            | GCF_000196115.1 |
| WP_165069081.1 | TPR+PIN*→                                                 | TPR+PIN                  | 1123 | -        | Actinobacteria      | Marisediminicola senii           | hypothetical protein [Marisediminicola senii].                            | GCF_011057645.1 |
| WP_165087560.1 | REase+TPR+GreAB-C+PIN*→                                   | REase+TPR+GreAB-C+PIN    | 1326 | -        | Betaproteobacteria  | Caballeronia sp. SBC2            | hypothetical protein [Caballeronia sp. SBC2].                             | GCF_011039955.1 |

| acc            | operon                                                        | architecture              | len  | gen.name | taxend              | species                                   | define                                                               | gca             |
|----------------|---------------------------------------------------------------|---------------------------|------|----------|---------------------|-------------------------------------------|----------------------------------------------------------------------|-----------------|
| WP_165198604.1 | TPR+GreAB-C+PIN*→                                             | TPR+GreAB-C+PIN           | 1240 | -        | Alphaproteobacteria | Pseudohalocynthiibacter aestuariivivens   | hypothetical protein [Pseudohalocynthiibacter aestuariivivens].      | GCF_011040495.1 |
| WP_165399219.1 | REase+TPR+GreAB-C+PIN*→                                       | REase+TPR+GreAB-C+PIN     | 1316 | -        | Alphaproteobacteria | Komagataeibacter xylinus                  | GreA/GreB family elongation factor [Komagataeibacter xylinus].       | GCF_004302915.1 |
| WP_165684855.1 | TPR+PIN*→                                                     | TPR+PIN                   | 1088 | -        | Actinobacteria      | Streptomyces sp. KO7888                   | hypothetical protein [Streptomyces sp. KO7888].                      | GCF_011317205.1 |
| WP_165714007.1 | TPR+GreAB-C+PIN*→                                             | TPR+GreAB-C+PIN           | 924  | -        | Betaproteobacteria  | Rubrivivax benzoatilyticus                | hypothetical protein, partial [Rubrivivax benzoatilyticus].          | GCF_011365705.1 |
| WP_165715394.1 | HetE-N1→?→?→ TPR+GreAB-C+PIN*→                                | TPR+GreAB-C+PIN           | 776  | -        | Gammaproteobacteria | Salmonella enterica                       | hypothetical protein [Salmonella enterica].                          | GCF_011368495.1 |
| WP_165722314.1 | HetE-N1→ TPR+GreAB-C+PIN*→                                    | TPR+GreAB-C+PIN           | 1113 | -        | Gammaproteobacteria | unclassified Pseudoalteromonas            | MULTISPECIES: hypothetical protein [unclassified Pseudoalteromonas]. | GCF_011378665.1 |
| WP_165919434.1 | REase+TPR+GreAB-C+PIN*→ TPR→                                  | REase+TPR+GreAB-C+PIN     | 1252 | -        | Actinobacteria      | Promicromonospora sp. CF082               | DUF4365 domain-containing protein [Promicromonospora sp. CF082].     | GCF_004341335.1 |
| WP_166221458.1 | HTH→ HetE-N1→ TPR+GreAB-C+PIN*→                               | TPR+GreAB-C+PIN           | 1076 | -        | Gammaproteobacteria | Acinetobacter shaoyimingii                | hypothetical protein [Acinetobacter shaoyimingii].                   | GCF_011578045.1 |
| WP_166315930.1 | X+PIN*→                                                       | X+PIN                     | 1081 | -        | Actinobacteria      | Microbacterium excoecariae                | hypothetical protein [Microbacterium excoecariae].                   | GCF_011326725.1 |
| WP_166694175.1 | Mbetalac→ Trypsin+TPR+GreAB-C+PIN*→                           | Trypsin+TPR+GreAB-C+PIN   | 1365 | -        | Bacteroidetes       | Fibrella aestuarina                       | trypsin-like serine protease [Fibrella aestuarina].                  | GCF_011742925.1 |
| WP_166748348.1 | REase+TPR+GreAB-C+PIN*→                                       | REase+TPR+GreAB-C+PIN     | 1323 | -        | Alphaproteobacteria | Sphingomonas aerolata                     | hypothetical protein [Sphingomonas aerolata].                        | GCF_011759485.1 |
| WP_166760128.1 | X+PIN*→                                                       | X+PIN                     | 1124 | -        | Actinobacteria      | Frigoribacterium faeni                    | hypothetical protein [Frigoribacterium faeni].                       | GCF_011761235.1 |
| WP_166908249.1 | TPR+PIN*→                                                     | TPR+PIN                   | 1129 | -        | Actinobacteria      | Mycobacterium sp. DL440                   | hypothetical protein [Mycobacterium sp. DL440].                      | GCF_011745145.1 |
| WP_167081447.1 | REase+TPR+GreAB-C+PIN*→                                       | REase+TPR+GreAB-C+PIN     | 1510 | -        | Betaproteobacteria  | 'Massilia aquatica' Holochova et al. 2020 | hypothetical protein ['Massilia aquatica' Holochova et al. 2020].    | GCF_011682045.1 |
| WP_167302996.1 | REase+TPR+GreAB-C+PIN*→                                       | REase+TPR+GreAB-C+PIN     | 1316 | -        | Alphaproteobacteria | Sphingobium vermicomposti                 | hypothetical protein [Sphingobium vermicomposti].                    | GCF_011762025.1 |
| WP_167344464.1 | TPR+PIN*→   <-NUDIX                                           | TPR+PIN                   | 1134 | -        | Actinobacteria      | Streptomyces griseolus                    | hypothetical protein [Streptomyces griseolus].                       | GCF_000721185.1 |
| WP_167432534.1 | HetE-N1→ TPR+GreAB-C+PIN*→                                    | TPR+GreAB-C+PIN           | 1111 | -        | Gammaproteobacteria | Pantoea                                   | MULTISPECIES: hypothetical protein [Pantoea].                        | GCF_011800365.1 |
| WP_168003144.1 | TM+TPR+PIN*→                                                  | TM+TPR+PIN                | 1126 | -        | Actinobacteria      | Micromonospora sp. HSS6-12                | hypothetical protein, partial [Micromonospora sp. HSS6-12].          | GCF_012034245.1 |
| WP_168341898.1 | REase+TPR+TPR+GreAB-C+PIN*→                                   | REase+TPR+TPR+GreAB-C+PIN | 1233 | -        | Alphaproteobacteria | Rhizobium leguminosarum                   | hypothetical protein [Rhizobium leguminosarum].                      | GCF_012276075.1 |
| WP_168426515.1 | TPR+GreAB-C+PIN*→                                             | TPR+GreAB-C+PIN           | 461  | -        | Gammaproteobacteria | Pseudomonas sp. SST3                      | hypothetical protein, partial [Pseudomonas sp. SST3].                | GCF_003325755.1 |
| WP_168560628.1 | REase+TPR+GreAB-C+PIN*→                                       | REase+TPR+GreAB-C+PIN     | 1337 | -        | Betaproteobacteria  | Rhizobacter sp. SG703                     | hypothetical protein [Rhizobacter sp. SG703].                        | GCF_012275445.1 |
| WP_168617642.1 | TPR+PIN*→                                                     | TPR+PIN                   | 1210 | -        | Actinobacteria      | Nocardioides sp. JQ2195                   | hypothetical protein [Nocardioides sp. JQ2195].                      | GCF_012272695.1 |
| WP_168725201.1 | TPR+PIN*→                                                     | TPR+PIN                   | 1218 | -        | Actinobacteria      | Streptomyces galbus                       | hypothetical protein [Streptomyces galbus].                          | GCF_014650535.1 |
| WP_168927382.1 | TPR+GreAB-C+PIN*→                                             | TPR+GreAB-C+PIN           | 546  | -        | Gammaproteobacteria | Enterobacter hormaechei                   | hypothetical protein, partial [Enterobacter hormaechei].             | GCF_902166805.1 |
| WP_169321903.1 | TPR+GreAB-C+PIN*→                                             | TPR+GreAB-C+PIN           | 1137 | -        | Bacteroidetes       | Chryseobacterium                          | MULTISPECIES: hypothetical protein [Chryseobacterium].               | GCF_012952015.1 |
| WP_169448013.1 | REase+TPR+GreAB-C+PIN*→                                       | REase+TPR+GreAB-C+PIN     | 1243 | -        | Gammaproteobacteria | Stenotrophomonas maltophilia              | hypothetical protein [Stenotrophomonas maltophilia].                 | GCF_012971765.1 |
| WP_169574578.1 | REase+TPR+GreAB-C+PIN→ TPR+GreAB-C+PIN*→                      | TPR+GreAB-C+PIN           | 628  | -        | Alphaproteobacteria | Sphingobium psychrophilum                 | hypothetical protein [Sphingobium psychrophilum].                    | GCF_012927105.1 |
| WP_169902587.1 | REase+TPR+GreAB-C+PIN*→                                       | REase+TPR+GreAB-C+PIN     | 1321 | -        | Gammaproteobacteria | Pseudomonas rhodesiae                     | DUF4365 domain-containing protein [Pseudomonas rhodesiae].           | GCF_012985855.1 |
| WP_169912953.1 | TPR+GreAB-C+PIN*→                                             | TPR+GreAB-C+PIN           | 1140 | -        | Gammaproteobacteria | Pseudomonas chlororaphis                  | hypothetical protein [Pseudomonas chlororaphis].                     | GCF_012986925.1 |
| WP_169922112.1 | TPR+GreAB-C+PIN*→                                             | TPR+GreAB-C+PIN           | 1148 | -        | Gammaproteobacteria | Pseudomonas sp. WS 5503                   | hypothetical protein [Pseudomonas sp. WS 5503].                      | GCF_012985385.1 |
| WP_170029824.1 | REase+TPR+GreAB-C+PIN*→                                       | REase+TPR+GreAB-C+PIN     | 1470 | -        | Gammaproteobacteria | Pseudomonas sp. SK                        | hypothetical protein [Pseudomonas sp. SK].                           | GCF_012975065.1 |
| WP_170117623.1 | HNH+TPR+GreAB-C+PIN*→                                         | HNH+TPR+GreAB-C+PIN       | 1207 | -        | Bacteroidetes       | Chitinophaga ginsengisoli                 | hypothetical protein [Chitinophaga ginsengisoli].                    | GCF_003014595.1 |
| WP_170323822.1 | REase+TPR+GreAB-C+PIN*→                                       | REase+TPR+GreAB-C+PIN     | 1251 | -        | Actinobacteria      | Cryptosporangium phraense                 | DUF4365 domain-containing protein [Cryptosporangium phraense].       | GCF_006912135.1 |
| WP_170431548.1 | REase+TPR+GreAB-C+PIN*→?→   <-?<-?<-BTLC+P+SFI-helicase+REase | REase+TPR+GreAB-C+PIN     | 1310 | -        | Alphaproteobacteria | Ruegeria arenilitoris                     | tetratricopeptide repeat protein [Ruegeria arenilitoris].            | GCF_013032225.1 |
| WP_171027511.1 | TPR+PIN*→                                                     | TPR+PIN                   | 973  | -        | Actinobacteria      | Pseudarthrobacter sp. NamE2               | tetratricopeptide repeat protein [Pseudarthrobacter sp. NamE2].      | GCF_005796205.1 |

| acc            | operon                                                               | architecture              | len  | gen.name | taxend              | species                      | define                                                                 | gca             |
|----------------|----------------------------------------------------------------------|---------------------------|------|----------|---------------------|------------------------------|------------------------------------------------------------------------|-----------------|
| WP_171071268.1 | REase+TPR+GreAB-C+PIN*→                                              | REase+TPR+GreAB-C+PIN     | 1155 | -        | Gammaproteobacteria | Acinetobacter baumannii      | GreA/GreB family elongation factor, partial [Acinetobacter baumannii]. | GCF_000580875.1 |
| WP_171275163.1 | HetE-N1→ TPR+GreAB-C+PIN*→                                           | TPR+GreAB-C+PIN           | 1094 | -        | Gammaproteobacteria | Aeromonas media              | hypothetical protein [Aeromonas media].                                | GCF_013085485.1 |
| WP_171434497.1 | DOC+HTH→ REase+TOPC→?→ HetE-N1+TPR+GreAB-C+PIN*→                     | HetE-N1+TPR+GreAB-C+PIN   | 1124 | -        | Gammaproteobacteria | Pseudomonas aeruginosa       | hypothetical protein [Pseudomonas aeruginosa].                         | GCF_013115755.1 |
| WP_171451709.1 | DOC+HTH→ REase+TOPC→?→ HetE-N1→ GreAB-C+PIN*→                        | GreAB-C+PIN               | 523  | -        | Gammaproteobacteria | Pseudomonas aeruginosa       | hypothetical protein [Pseudomonas aeruginosa].                         | GCF_013115805.1 |
| WP_171477953.1 | TPR+GreAB-C+PIN*→   <~?  HTH→                                        | TPR+GreAB-C+PIN           | 652  | -        | Gammaproteobacteria | Acinetobacter baumannii      | GreA/GreB family elongation factor, partial [Acinetobacter baumannii]. | GCF_006491975.1 |
| WP_171493638.1 | TPR+GreAB-C+PIN*→                                                    | TPR+GreAB-C+PIN           | 816  | -        | Gammaproteobacteria | Acinetobacter soli           | hypothetical protein, partial [Acinetobacter soli].                    | GCF_008987205.1 |
| WP_171564538.1 | TPR+PIN*→                                                            | TPR+PIN                   | 1172 | -        | Firmicutes          | Brevibacillus sp. MCWH       | hypothetical protein [Brevibacillus sp. MCWH].                         | GCF_018195675.1 |
| WP_171662370.1 | REase+TPR+GreAB-C+PIN*→                                              | REase+TPR+GreAB-C+PIN     | 1496 | -        | Betaproteobacteria  | Achromobacter deleyi         | hypothetical protein [Achromobacter deleyi].                           | GCF_013116765.1 |
| WP_171694982.1 | HetE-N1→ TPR+GreAB-C+PIN*→                                           | TPR+GreAB-C+PIN           | 1120 | -        | Gammaproteobacteria | Methylobacterium sp. ZR1     | hypothetical protein [Methylobacterium sp. ZR1].                       | GCF_013141865.1 |
| WP_171798091.1 | REase+TPR+GreAB-C+PIN*→                                              | REase+TPR+GreAB-C+PIN     | 1323 | -        | Alphaproteobacteria | unclassified Novosphingobium | MULTISPECIES: hypothetical protein [unclassified Novosphingobium].     | GCF_013149315.1 |
| WP_172598885.1 | TPR+GreAB-C+PIN*→                                                    | TPR+GreAB-C+PIN           | 709  | -        | Alphaproteobacteria | Sphingobium sp. YG1          | hypothetical protein [Sphingobium sp. YG1].                            | GCF_003609795.1 |
| WP_172685391.1 | REase+TPR+GreAB-C+PIN*→?→?→ Calcineurin→ Calcineurin→?→ Calcineurin→ | REase+TPR+GreAB-C+PIN     | 1311 | -        | Alphaproteobacteria | Methylobacterium oryzae      | hypothetical protein [Methylobacterium oryzae].                        | -               |
| WP_172806748.1 | TPR+GreAB-C+PIN*→                                                    | TPR+GreAB-C+PIN           | 766  | -        | Gammaproteobacteria | Endozoicomonas arenosclerae  | hypothetical protein [Endozoicomonas arenosclerae].                    | GCF_001562015.1 |
| WP_172870236.1 | TPR+GreAB-C*→                                                        | TPR+GreAB-C               | 233  | -        | Firmicutes          | Bacillus velezensis          | hypothetical protein, partial [Bacillus velezensis].                   | GCF_013267055.1 |
| WP_172883554.1 | TPR+GreAB-C+PIN*→                                                    | TPR+GreAB-C+PIN           | 1159 | -        | Gammaproteobacteria | Pseudomonas stutzeri         | hypothetical protein [Pseudomonas stutzeri].                           | GCF_013267085.1 |
| WP_173054693.1 | TM+TPR+PIN*→ REase→                                                  | TM+TPR+PIN                | 1322 | -        | Actinobacteria      | Phytohabitans houttuyniae    | hypothetical protein [Phytohabitans houttuyniae].                      | GCF_011764425.1 |
| WP_173520689.1 | REase+TPR+TPR+GreAB-C+PIN*→                                          | REase+TPR+TPR+GreAB-C+PIN | 1357 | -        | Alphaproteobacteria | Ensifer sesbaniae            | hypothetical protein [Ensifer sesbaniae].                              | GCF_013283665.1 |
| WP_173522752.1 | REase+TPR+GreAB-C+PIN*→                                              | REase+TPR+GreAB-C+PIN     | 1313 | -        | Actinobacteria      | Nonomurea sp. NN258          | hypothetical protein [Nonomurea sp. NN258].                            | GCF_013283785.1 |
| WP_173794050.1 | NACHT→ X+PIN*→ HTH→?→?→ HTH→                                         | X+PIN                     | 1179 | -        | Firmicutes          | Dorea formicigenerans        | hypothetical protein [Dorea formicigenerans].                          | GCF_013301385.1 |
| WP_173821757.1 | X+PIN*→ HTH→?→?→ HTH→                                                | X+PIN                     | 1178 | -        | Firmicutes          | Dorea formicigenerans        | hypothetical protein [Dorea formicigenerans].                          | GCF_013301365.1 |
| WP_173853982.1 | TPR+GreAB-C+PIN→ PIN*→                                               | PIN                       | 248  | -        | Bacteroidetes       | Flavobacterium sp. 28A       | hypothetical protein [Flavobacterium sp. 28A].                         | GCF_013294005.1 |
| WP_173968533.1 | GreAB-C+PIN*→                                                        | GreAB-C+PIN               | 552  | -        | Bacteroidetes       | Flavobacterium collinsii     | hypothetical protein, partial [Flavobacterium collinsii].              | GCF_902804485.1 |
| WP_173994169.1 | TPR+GreAB-C+PIN*→                                                    | TPR+GreAB-C+PIN           | 1181 | -        | Alphaproteobacteria | Agrobacterium fabrum         | hypothetical protein [Agrobacterium fabrum].                           | GCF_013318355.1 |
| WP_174011044.1 | HEPN→ REase+TPR+TPR+GreAB-C+PIN*→                                    | REase+TPR+TPR+GreAB-C+PIN | 1333 | -        | Alphaproteobacteria | Agrobacterium rhizogenes     | GreA/GreB family elongation factor [Agrobacterium rhizogenes].         | GCF_013321105.1 |
| WP_174166670.1 | BirA-HTH→ HEPN→ REase+TPR+TPR+GreAB-C+PIN*→                          | REase+TPR+TPR+GreAB-C+PIN | 1341 | -        | Alphaproteobacteria | Agrobacterium rhizogenes     | hypothetical protein [Agrobacterium rhizogenes].                       | GCF_013322015.1 |
| WP_174168420.1 | BirA-HTH→ HEPN→ REase+TPR+TPR+GreAB-C+PIN*→                          | REase+TPR+TPR+GreAB-C+PIN | 1333 | -        | Alphaproteobacteria | Agrobacterium rhizogenes     | GreA/GreB family elongation factor [Agrobacterium rhizogenes].         | GCF_013321875.1 |
| WP_174361404.1 | HetE-N1→?→ TPR+GreAB-C+PIN*→                                         | TPR+GreAB-C+PIN           | 512  | -        | Gammaproteobacteria | Citrobacter gillenii         | hypothetical protein [Citrobacter gillenii].                           | GCF_013337685.1 |
| WP_175386063.1 | PIN*→                                                                | PIN                       | 434  | -        | Gammaproteobacteria | Pseudomonas corrugata        | hypothetical protein [Pseudomonas corrugata].                          | GCF_013359545.1 |
| WP_175666066.1 | REase+TPR+GreAB-C+PIN*→                                              | REase+TPR+GreAB-C+PIN     | 1351 | -        | Betaproteobacteria  | Burkholderia ambifaria       | hypothetical protein [Burkholderia ambifaria].                         | GCF_902829825.1 |
| WP_175722904.1 | REase+TPR+GreAB-C+PIN*→                                              | REase+TPR+GreAB-C+PIN     | 1351 | -        | Betaproteobacteria  | Burkholderia ambifaria       | hypothetical protein [Burkholderia ambifaria].                         | GCF_902829925.1 |
| WP_175818825.1 | REase+TPR+GreAB-C+PIN*→                                              | REase+TPR+GreAB-C+PIN     | 1335 | -        | Betaproteobacteria  | Burkholderia sp. BCC0419     | hypothetical protein [Burkholderia sp. BCC0419].                       | GCF_902830285.1 |
| WP_175896466.1 | TPR+GreAB-C+PIN*→   <-HTH+HTH                                        | TPR+GreAB-C+PIN           | 872  | -        | Betaproteobacteria  | Burkholderia cepacia         | hypothetical protein [Burkholderia cepacia].                           | GCF_902830675.1 |
| WP_176170943.1 | REase+TPR+GreAB-C+PIN*→                                              | REase+TPR+GreAB-C+PIN     | 1244 | -        | Actinobacteria      | Amycolatopsis sp. Hca4       | DUF4365 domain-containing protein [Amycolatopsis sp. Hca4].            | GCF_013364075.1 |
| WP_176203105.1 | TPR+GreAB-C+PIN*→                                                    | TPR+GreAB-C+PIN           | 681  | -        | Gammaproteobacteria | Salmonella enterica          | hypothetical protein, partial [Salmonella enterica].                   | GCF_002044735.1 |
| WP_176308009.1 | REase+TPR+GreAB-C+PIN*→                                              | REase+TPR+GreAB-C+PIN     | 1351 | -        | Betaproteobacteria  | Burkholderia ambifaria       | hypothetical protein [Burkholderia ambifaria].                         | GCF_902830205.1 |
| WP_176329154.1 | REase+TPR+GreAB-C+PIN*→                                              | REase+TPR+GreAB-C+PIN     | 1335 | -        | Betaproteobacteria  | Burkholderia vietnamiensis   | hypothetical protein [Burkholderia vietnamiensis].                     | GCF_902833435.1 |
| WP_176389972.1 | REase+TPR+GreAB-C+PIN*→                                              | REase+TPR+GreAB-C+PIN     | 1374 | -        | Betaproteobacteria  | Janthinobacterium sp. BJB401 | hypothetical protein [Janthinobacterium sp. BJB401].                   | GCF_013372745.1 |
| WP_176422167.1 | REase+TPR+TPR+GreAB-C+PIN*→                                          | REase+TPR+TPR+GreAB-C+PIN | 1325 | -        | Alphaproteobacteria | Bradyrhizobium sp. 2S1       | hypothetical protein [Bradyrhizobium sp. 2S1].                         | GCF_011516625.2 |
| WP_176457673.1 | REase+TPR+GreAB-C+PIN*→                                              | REase+TPR+GreAB-C+PIN     | 1516 | -        | Gammaproteobacteria | Pseudomonas mandelii         | hypothetical protein [Pseudomonas mandelii].                           | GCF_000257545.3 |
| WP_176459502.1 | REase+TPR+GreAB-C+PIN*→?→ Trypsin→                                   | REase+TPR+GreAB-C+PIN     | 1228 | -        | Actinobacteria      | Rhodococcus sp. OK302        | DUF4365 domain-containing protein [Rhodococcus sp. OK302].             | GCF_002245895.1 |
| WP_176508867.1 | REase+TPR+GreAB-C+PIN*→                                              | REase+TPR+GreAB-C+PIN     | 1548 | -        | Gammaproteobacteria | Pseudomonas sp. BML-PP042    | hypothetical protein [Pseudomonas sp. BML-PP042].                      | GCF_013373915.1 |

| acc            | operon                                                    | architecture              | len  | gen.name | taxend              | species                                | define                                                              | gca             |
|----------------|-----------------------------------------------------------|---------------------------|------|----------|---------------------|----------------------------------------|---------------------------------------------------------------------|-----------------|
| WP_177062188.1 | REase+TPR+GreAB-C+PIN*→                                   | REase+TPR+GreAB-C+PIN     | 1424 | -        | Gammaproteobacteria | <i>Pseudomonas reactans</i>            | hypothetical protein [Pseudomonas reactans].                        | GCF_013386305.1 |
| WP_177327801.1 | REase+TPR+GreAB-C+PIN*→                                   | REase+TPR+GreAB-C+PIN     | 1404 | -        | Gammaproteobacteria | <i>Pseudomonas</i> sp. 5               | GreA/GreB family elongation factor [Pseudomonas sp. 5].             | GCF_000955815.1 |
| WP_179038946.1 | REase+TPR+TPR+GreAB-C+PIN*→                               | REase+TPR+TPR+GreAB-C+PIN | 1350 | -        | Alphaproteobacteria | <i>Rhizobium leguminosarum</i>         | hypothetical protein [Rhizobium leguminosarum].                     | GCF_013391705.1 |
| WP_179093684.1 | TPR+GreAB-C+PIN*→   <-HTH+HTH                             | TPR+GreAB-C+PIN           | 872  | -        | Betaproteobacteria  | <i>Burkholderia pseudomallei</i>       | hypothetical protein [Burkholderia pseudomallei].                   | GCF_002880985.1 |
| WP_179103158.1 | TPR+GreAB-C+PIN*→   <-HTH+HTH                             | TPR+GreAB-C+PIN           | 872  | -        | Betaproteobacteria  | <i>Burkholderia pseudomallei</i>       | hypothetical protein [Burkholderia pseudomallei].                   | GCF_001981185.1 |
| WP_179448733.1 | -                                                         | -                         | 914  | -        | Gammaproteobacteria | <i>Pseudomonas yamanorum</i>           | hypothetical protein [Pseudomonas yamanorum].                       | GCF_013403585.1 |
| WP_179622762.1 | DOC+HTH→ REase+TOPC→?→ HetE-N1→ HetE-N1+TPR+GreAB-C+PIN*→ | HetE-N1+TPR+GreAB-C+PIN   | 1124 | -        | Gammaproteobacteria | <i>Pseudomonas mendocina</i>           | hypothetical protein [Pseudomonas mendocina].                       | GCF_013410555.1 |
| WP_179654574.1 | REase+TPR+TPR+GreAB-C+PIN*→ REase→                        | REase+TPR+TPR+GreAB-C+PIN | 1329 | -        | Alphaproteobacteria | <i>Mesorhizobium</i> sp. YL-MPnR-2016  | hypothetical protein [Mesorhizobium sp. YL-MPnR-2016].              | GCF_013408905.1 |
| WP_179833445.1 | REase+TPR+PIN*→                                           | REase+TPR+PIN             | 1241 | -        | Actinobacteria      | <i>Actinomadura citrea</i>             | DUF4365 domain-containing protein [Actinomadura citrea].            | GCF_014648455.1 |
| WP_179902819.1 | HetE-N1→ TPR+GreAB-C+PIN*→                                | TPR+GreAB-C+PIN           | 1094 | -        | Gammaproteobacteria | <i>Aeromonas veronii</i>               | hypothetical protein [Aeromonas veronii].                           | GCF_013415825.1 |
| WP_180191279.1 | HTH→ HetE-N1→ HetE-N1+GreAB-C+PIN*→                       | HetE-N1+GreAB-C+PIN       | 1077 | -        | Gammaproteobacteria | <i>Acinetobacter</i> sp. YH01006       | hypothetical protein [Acinetobacter sp. YH01006].                   | GCF_013420445.1 |
| WP_180269129.1 | TPR+GreAB-C+PIN*→                                         | TPR+GreAB-C+PIN           | 1231 | -        | Bacteroidetes       | <i>Sphingobacterium</i> sp. 1.A.5      | tetratricopeptide repeat protein [Sphingobacterium sp. 1.A.5].      | GCF_002734235.1 |
| WP_180491971.1 | HetE-N1→ TPR+GreAB-C+PIN*→                                | TPR+GreAB-C+PIN           | 1106 | -        | Gammaproteobacteria | <i>Escherichia fergusonii</i>          | hypothetical protein [Escherichia fergusonii].                      | GCF_903932165.1 |
| WP_180778225.1 | HetE-N1→ TPR+GreAB-C+PIN*→                                | TPR+GreAB-C+PIN           | 1117 | -        | Gammaproteobacteria | <i>Pectobacterium aroidearum</i>       | hypothetical protein [Pectobacterium aroidearum].                   | GCF_013449715.1 |
| WP_180799798.1 | TPR+GreAB-C+PIN*→                                         | TPR+GreAB-C+PIN           | 796  | -        | Gammaproteobacteria | <i>Vibrio parahaemolyticus</i>         | hypothetical protein, partial [Vibrio parahaemolyticus].            | GCF_006371865.1 |
| WP_180830729.1 | TPR+GreAB-C+PIN*→                                         | TPR+GreAB-C+PIN           | 764  | -        | Gammaproteobacteria | <i>Vibrio parahaemolyticus</i>         | hypothetical protein, partial [Vibrio parahaemolyticus].            | GCF_006375165.1 |
| WP_180977515.1 | TPR+GreAB-C+PIN*→                                         | TPR+GreAB-C+PIN           | 1154 | -        | Betaproteobacteria  | <i>Janthinobacterium</i> sp. ROICE36   | hypothetical protein, partial [Janthinobacterium sp. ROICE36].      | GCF_002869965.1 |
| WP_181464939.1 | TPR+GreAB-C+PIN*→                                         | TPR+GreAB-C+PIN           | 762  | -        | Betaproteobacteria  | <i>Herbaspirillum rubrisubalbicans</i> | tetratricopeptide repeat protein [Herbaspirillum rubrisubalbicans]. | GCF_003263475.1 |
| WP_181641518.1 | TPR+PIN*→                                                 | TPR+PIN                   | 1210 | -        | Actinobacteria      | <i>Nocardioides massiliensis</i>       | hypothetical protein [Nocardioides massiliensis].                   | GCF_900067705.2 |
| WP_181834083.1 | TPR+GreAB-C+PIN*→                                         | TPR+GreAB-C+PIN           | 678  | -        | Alphaproteobacteria | <i>Brucella anthropi</i>               | hypothetical protein, partial [Brucella anthropi].                  | GCF_003325675.1 |
| WP_182064218.1 | TPR+PIN*→                                                 | TPR+PIN                   | 1177 | -        | Actinobacteria      | <i>Curtobacterium</i> sp. ME12         | hypothetical protein [Curtobacterium sp. ME12].                     | GCF_903970855.1 |
| WP_182166026.1 | REase+TPR+GreAB-C+PIN*→   <-HTH                           | REase+TPR+GreAB-C+PIN     | 1304 | -        | Betaproteobacteria  | <i>Duganella</i> sp. LX20W             | hypothetical protein [Duganella sp. LX20W].                         | GCF_014042345.1 |
| WP_182270399.1 | HetE-N1→ TPR+GreAB-C+PIN*→                                | TPR+GreAB-C+PIN           | 1092 | -        | Gammaproteobacteria | <i>Citrobacter freundii</i>            | hypothetical protein [Citrobacter freundii].                        | GCF_014101305.1 |
| WP_182650750.1 | GreAB-C+PIN*→                                             | GreAB-C+PIN               | 566  | -        | Bacteroidetes       | <i>Flavobacterium</i> sp. SOK18b       | hypothetical protein, partial [Flavobacterium sp. SOK18b].          | GCF_014156605.1 |
| WP_182869571.1 | PIN*→                                                     | PIN                       | 188  | -        | Alphaproteobacteria | <i>Bradyrhizobium diazoefficiens</i>   | hypothetical protein [Bradyrhizobium diazoefficiens].               | GCF_014163475.1 |
| WP_182925384.1 | REase+TPR+GreAB-C+PIN*→   <-?  HTH→                       | REase+TPR+GreAB-C+PIN     | 1250 | -        | Gammaproteobacteria | <i>Acinetobacter baumannii</i>         | GreA/GreB family elongation factor [Acinetobacter baumannii].       | GCF_014169655.1 |
| WP_183061688.1 | CARF+PIN*→                                                | CARF+PIN                  | 1208 | -        | Actinobacteria      | <i>Motilobacter peucedani</i>          | hypothetical protein [Motilobacter peucedani].                      | GCF_003634695.1 |
| WP_183296812.1 | REase+TPR+GreAB-C+PIN*→                                   | REase+TPR+GreAB-C+PIN     | 1234 | -        | Actinobacteria      | <i>Cellulomonas cellasea</i>           | DUF4365 domain-containing protein [Cellulomonas cellasea].          | GCF_014190965.1 |
| WP_183420610.1 | REase+TPR+GreAB-C+PIN*→                                   | REase+TPR+GreAB-C+PIN     | 1219 | -        | Actinobacteria      | <i>Microbacterium proteolyticum</i>    | DUF4365 domain-containing protein [Microbacterium proteolyticum].   | GCF_014192415.1 |
| WP_183438886.1 | TPR+GreAB-C+PIN*→                                         | TPR+GreAB-C+PIN           | 1161 | -        | Alphaproteobacteria | <i>Methylobacterium</i> sp. R2-1       | hypothetical protein [Methylobacterium sp. R2-1].                   | GCF_014191355.1 |
| WP_183694785.1 | REase+TPR+TPR+GreAB-C+PIN*→                               | REase+TPR+TPR+GreAB-C+PIN | 1363 | -        | Alphaproteobacteria | <i>Rhizobium lusitanum</i>             | restriction endonuclease [Rhizobium lusitanum].                     | GCF_014189535.1 |
| WP_183714092.1 | TIR→?→ TPR+GreAB-C+PIN*→                                  | TPR+GreAB-C+PIN           | 1131 | -        | Alphaproteobacteria | <i>Bradyrhizobium</i> sp. ERR14        | hypothetical protein [Bradyrhizobium sp. ERR14].                    | GCF_014198235.1 |
| WP_183806882.1 | REase+TPR+TPR+GreAB-C+PIN*→                               | REase+TPR+TPR+GreAB-C+PIN | 1345 | -        | Alphaproteobacteria | <i>Rhizobium azooxidifex</i>           | tetratricopeptide repeat protein [Rhizobium azooxidifex].           | GCF_014196765.1 |
| WP_183919890.1 | REase+TPR+GreAB-C+PIN*→                                   | REase+TPR+GreAB-C+PIN     | 1290 | -        | Alphaproteobacteria | <i>Rhizobium lentis</i>                | hypothetical protein [Rhizobium lentis].                            | GCF_014200135.1 |
| WP_183998882.1 | REase+TPR+GreAB-C+PIN*→                                   | REase+TPR+GreAB-C+PIN     | 1313 | -        | Alphaproteobacteria | <i>Sphingomonas kyeonggiensis</i>      | hypothetical protein [Sphingomonas kyeonggiensis].                  | GCF_014196745.1 |
| WP_184249301.1 | REase+TPR+GreAB-C+PIN*→                                   | REase+TPR+GreAB-C+PIN     | 1318 | -        | Betaproteobacteria  | <i>Paraburkholderia atlantica</i>      | DUF4365 domain-containing protein [Paraburkholderia atlantica].     | GCF_014200895.1 |

| acc            | operon                                                                                | architecture               | len  | gen.name | taxend              | species                       | define                                                                         | gca             |
|----------------|---------------------------------------------------------------------------------------|----------------------------|------|----------|---------------------|-------------------------------|--------------------------------------------------------------------------------|-----------------|
| WP_184301652.1 | REase+TPR+GreAB-C+PIN*→?→?→ URI+RAMA→                                                 | REase+TPR+GreAB-C+PIN      | 1255 | -        | Planctomycetes      | Rhodopirellula rubra          | hypothetical protein [Rhodopirellula rubra].                                   | GCF_014192335.1 |
| WP_184659486.1 | TPR+GreAB-C+PIN*→                                                                     | TPR+GreAB-C+PIN            | 1265 | -        | Bacteroidetes       | Pedobacter cryoconitis        | hypothetical protein [Pedobacter cryoconitis].                                 | GCF_014207145.1 |
| WP_184790984.1 | TM+TPR+PIN*→                                                                          | TM+TPR+PIN                 | 1158 | -        | Actinobacteria      | Phytomonospora endophytica    | hypothetical protein [Phytomonospora endophytica].                             | GCF_016862855.1 |
| WP_184920984.1 | REase+PIN*→                                                                           | REase+PIN                  | 1270 | -        | Actinobacteria      | Saccharothrix ecbatanensis    | DUF4365 domain-containing protein [Saccharothrix ecbatanensis].                | GCF_014205015.1 |
| WP_185002860.1 | -                                                                                     | -                          | 1209 | -        | Actinobacteria      | unclassified Curtobacterium   | MULTISPECIES: DUF4365 domain-containing protein [unclassified Curtobacterium]. | GCF_003752345.1 |
| WP_186065300.1 | REase+TPR+GreAB-C+PIN*→                                                               | REase+TPR+GreAB-C+PIN      | 1351 | -        | Betaproteobacteria  | Burkholderia gladioli         | hypothetical protein [Burkholderia gladioli].                                  | GCF_902831285.1 |
| WP_186083524.1 | REase+TPR+GreAB-C+PIN*→   <-?<-?<-HEPN                                                | REase+TPR+GreAB-C+PIN      | 1333 | -        | Betaproteobacteria  | Burkholderia gladioli         | hypothetical protein [Burkholderia gladioli].                                  | GCF_902831185.1 |
| WP_186117779.1 | HEPN→?→?→ REase+TPR+GreAB-C+PIN*→                                                     | REase+TPR+GreAB-C+PIN      | 1498 | -        | Betaproteobacteria  | Burkholderia gladioli         | tetratricopeptide repeat protein [Burkholderia gladioli].                      | GCF_902831505.1 |
| WP_186135768.1 | REase+TPR+GreAB-C+PIN*→   <-HEPN                                                      | REase+TPR+GreAB-C+PIN      | 1351 | -        | Betaproteobacteria  | Burkholderia gladioli         | hypothetical protein [Burkholderia gladioli].                                  | GCF_902831685.1 |
| WP_186296902.1 | REase+TPR+GreAB-C+PIN*→                                                               | REase+TPR+GreAB-C+PIN      | 1297 | -        | Betaproteobacteria  | Cupriavidus campinensis       | DUF4365 domain-containing protein [Cupriavidus campinensis].                   | GCF_007572485.1 |
| WP_186384760.1 | HetE-N1→ TPR+GreAB-C+PIN*→                                                            | TPR+GreAB-C+PIN            | 1117 | -        | Gammaproteobacteria | Klebsiella sp. Kpp            | hypothetical protein [Klebsiella sp. Kpp].                                     | GCF_014267405.1 |
| WP_186426553.1 | TPR+GreAB-C+PIN*→                                                                     | TPR+GreAB-C+PIN            | 1039 | -        | Betaproteobacteria  | Cupriavidus metallidurans     | hypothetical protein [Cupriavidus metallidurans].                              | GCF_900185755.1 |
| WP_187028576.1 | TPR+GreAB-C+PIN*→                                                                     | TPR+GreAB-C+PIN            | 1238 | -        | Bacteroidetes       | Pontibacter sp. KCTC 32443    | hypothetical protein [Pontibacter sp. KCTC 32443].                             | GCF_014297265.1 |
| WP_187110408.1 | REase+TPR+GreAB-C+PIN*→                                                               | REase+TPR+GreAB-C+PIN      | 1301 | -        | Betaproteobacteria  | Variovorax sp. PAMC26660      | hypothetical protein [Variovorax sp. PAMC26660].                               | GCF_014302995.1 |
| WP_187305744.1 | X+PIN*→ HTH→?→?→ HTH→                                                                 | X+PIN                      | 762  | -        | Firmicutes          | Dorea formicigenerans         | hypothetical protein [Dorea formicigenerans].                                  | GCF_003458845.1 |
| WP_187328643.1 | HTH+PNPase+TPR+GreAB-C+PIN*→                                                          | HTH+PNPase+TPR+GreAB-C+PIN | 1523 | -        | Actinobacteria      | Rhodococcus sp. WS3           | hypothetical protein [Rhodococcus sp. WS3].                                    | GCF_003797085.1 |
| WP_187494340.1 | HetE-N1→ TPR+GreAB-C+PIN*→                                                            | TPR+GreAB-C+PIN            | 1094 | -        | Gammaproteobacteria | Pantoea agglomerans           | hypothetical protein [Pantoea agglomerans].                                    | GCF_014353705.1 |
| WP_187598162.1 | REase+TPR+GreAB-C+PIN*→                                                               | REase+TPR+GreAB-C+PIN      | 1341 | -        | Betaproteobacteria  | Diaphorobacter ruginosibacter | hypothetical protein [Diaphorobacter ruginosibacter].                          | GCF_014395975.1 |
| WP_187723864.1 | TPR+GreAB-C+PIN*→                                                                     | TPR+GreAB-C+PIN            | 545  | -        | Betaproteobacteria  | Diaphorobacter aerolatus      | hypothetical protein [Diaphorobacter aerolatus].                               | GCF_014489535.1 |
| WP_187993242.1 | TPR+GreAB-C+PIN*→                                                                     | TPR+GreAB-C+PIN            | 557  | -        | Gammaproteobacteria | Vibrio Harveyi                | hypothetical protein [Vibrio Harveyi].                                         | GCF_014525195.1 |
| WP_188104481.1 | REase+TPR+GreAB-C+PIN*→                                                               | REase+TPR+GreAB-C+PIN      | 1312 | -        | Alphaproteobacteria | Bradyrhizobium campsiandrae   | tetratricopeptide repeat protein [Bradyrhizobium campsiandrae].                | GCF_014529705.1 |
| WP_188533557.1 | TPR+PIN*→                                                                             | TPR+PIN                    | 1228 | -        | Firmicutes          | Paenibacillus abyssi          | hypothetical protein [Paenibacillus abyssi].                                   | GCF_014640295.1 |
| WP_189032568.1 | TPR+PIN*→                                                                             | TPR+PIN                    | 531  | -        | Firmicutes          | Paenibacillus albidus         | hypothetical protein [Paenibacillus albidus].                                  | GCF_014644435.1 |
| WP_189091600.1 | REase+TPR+GreAB-C+PIN*→                                                               | REase+TPR+GreAB-C+PIN      | 1377 | -        | Deinococci          | Deinococcus ruber             | tetratricopeptide repeat protein [Deinococcus ruber].                          | GCF_014648095.1 |
| WP_189152287.1 | TPR+PIN*→                                                                             | TPR+PIN                    | 1218 | -        | Actinobacteria      | Streptomyces lacrimifluminis  | hypothetical protein [Streptomyces lacrimifluminis].                           | GCF_014646095.1 |
| WP_189484308.1 | HetE-N1→ TPR+GreAB-C+PIN*→                                                            | TPR+GreAB-C+PIN            | 1026 | -        | Gammaproteobacteria | Shewanella indica             | hypothetical protein [Shewanella indica].                                      | GCF_014652115.1 |
| WP_189568857.1 | Mbetalac→ TPR+GreAB-C+PIN*→                                                           | TPR+GreAB-C+PIN            | 1342 | -        | Bacteroidetes       | Persicitalea jodogahamensis   | hypothetical protein [Persicitalea jodogahamensis].                            | GCF_014651615.1 |
| WP_189617689.1 | HetE-N1→?→ GreAB-C*→                                                                  | GreAB-C                    | 498  | -        | Gammaproteobacteria | Shewanella fodinae            | hypothetical protein [Shewanella fodinae].                                     | GCF_014651955.1 |
| WP_189635482.1 | REase+TPR+GreAB-C+PIN*→                                                               | REase+TPR+GreAB-C+PIN      | 1307 | -        | Alphaproteobacteria | Gemmobacter lanyuensis        | restriction endonuclease [Gemmobacter lanyuensis].                             | GCF_014652355.1 |
| WP_189677864.1 | REase+TPR+GreAB-C+PIN*→                                                               | REase+TPR+GreAB-C+PIN      | 1323 | -        | Alphaproteobacteria | Sphingomonas glacialis        | tetratricopeptide repeat protein [Sphingomonas glacialis].                     | GCF_014653575.1 |
| WP_189835257.1 | TPR+PIN*→                                                                             | TPR+PIN                    | 1215 | -        | Actinobacteria      | Streptomyces zaomyceticus     | hypothetical protein [Streptomyces zaomyceticus].                              | GCF_014656215.1 |
| WP_190462433.1 | PNPase+TPR+GreAB-C+PIN*→ TPR+TPR→ TPR+TPR→                                            | PNPase+TPR+GreAB-C+PIN     | 1385 | -        | Cyanobacteria       | unclassified Planktothrix     | MULTISPECIES: hypothetical protein [unclassified Planktothrix].                | GCF_014696265.1 |
| WP_190659344.1 | BTLCP+NACHT→ APATPase+BetaPropeller→ APATPase+BetaPropeller→ PNPase+TPR+GreAB-C+PIN*→ | PNPase+TPR+GreAB-C+PIN     | 1399 | -        | Cyanobacteria       | Nostoc linckia                | tetratricopeptide repeat protein [Nostoc linckia].                             | GCF_014696615.1 |
| WP_190786133.1 | <-REase+nSTAND3  TPR+GreAB-C+PIN*→                                                    | TPR+GreAB-C+PIN            | 1282 | -        | Bacteroidetes       | Hymenobacter sp. BT646        | hypothetical protein [Hymenobacter sp. BT646].                                 | GCF_014698995.1 |
| WP_191117766.1 | HetE-N1→ TPR+GreAB-C+PIN*→                                                            | TPR+GreAB-C+PIN            | 1091 | -        | Gammaproteobacteria | Vibrio campbellii             | hypothetical protein [Vibrio campbellii].                                      | GCF_014769105.1 |
| WP_191340685.1 | REase+SNF2→ URI+RAMA→ TPR+GreAB-C+PIN*→                                               | TPR+GreAB-C+PIN            | 1182 | -        | Firmicutes          | Massilimicrobiota sp. An134   | hypothetical protein [Massilimicrobiota sp. An134].                            | GCF_904393125.1 |
| WP_191375963.1 | TPR+GreAB-C+PIN*→                                                                     | TPR+GreAB-C+PIN            | 879  | -        | Firmicutes          | [Clostridium] spiroforme      | hypothetical protein [[Clostridium] spiroforme].                               | GCF_904395875.1 |

| acc            | operon                                       | architecture              | len  | gen.name | taxend              | species                    | define                                                           | gca             |
|----------------|----------------------------------------------|---------------------------|------|----------|---------------------|----------------------------|------------------------------------------------------------------|-----------------|
| WP_191791215.1 | TPR+PIN*→                                    | TPR+PIN                   | 1225 | -        | Actinobacteria      | Oerskovia sp. Sa2CUA8      | hypothetical protein [Oerskovia sp. Sa2CUA8].                    | GCF_014836745.1 |
| WP_191917190.1 | HetE-N1→ TPR+GreAB-C+PIN*→                   | TPR+GreAB-C+PIN           | 1094 | -        | Gammaproteobacteria | Pantoea agglomerans        | hypothetical protein [Pantoea agglomerans].                      | GCF_014839545.1 |
| WP_191940182.1 | X+PIN*→                                      | X+PIN                     | 1078 | -        | Actinobacteria      | Plantibacter sp. CFBP 8775 | hypothetical protein [Plantibacter sp. CFBP 8775].               | GCF_014839505.1 |
| WP_191950701.1 | REase+TPR+GreAB-C+PIN*→                      | REase+TPR+GreAB-C+PIN     | 1485 | -        | Gammaproteobacteria | Pseudomonas fluorescens    | hypothetical protein [Pseudomonas fluorescens].                  | GCF_014839025.1 |
| WP_191971068.1 | TPR+GreAB-C+PIN*→                            | TPR+GreAB-C+PIN           | 525  | -        | Alphaproteobacteria | Methylobacterium soli      | hypothetical protein [Methylobacterium soli].                    | GCF_008806385.1 |
| WP_191999584.1 | REase+TPR+GreAB-C+PIN*→   <?-EAD2            | REase+TPR+GreAB-C+PIN     | 1036 | -        | Gammaproteobacteria | Pseudomonas coleopterorum  | hypothetical protein [Pseudomonas coleopterorum].                | GCF_014841305.1 |
| WP_192069209.1 | HetE-N1→ TPR+GreAB-C+PIN*→                   | TPR+GreAB-C+PIN           | 1105 | -        | Gammaproteobacteria | Pseudomonas coleopterorum  | hypothetical protein [Pseudomonas coleopterorum].                | GCF_014842375.1 |
| WP_192163653.1 | REase+TPR+GreAB-C+PIN*→                      | REase+TPR+GreAB-C+PIN     | 1250 | -        | Gammaproteobacteria | Rhodanobacter sp. DHG33    | hypothetical protein [Rhodanobacter sp. DHG33].                  | GCF_014843005.1 |
| WP_192260260.1 | REase+TPR+GreAB-C+PIN*→                      | REase+TPR+GreAB-C+PIN     | 1441 | -        | Gammaproteobacteria | Pseudomonas sp. Pdm06      | hypothetical protein [Pseudomonas sp. Pdm06].                    | GCF_014851795.1 |
| WP_192264655.1 | REase+TPR+GreAB-C+PIN*→                      | REase+TPR+GreAB-C+PIN     | 1316 | -        | Alphaproteobacteria | Komagataeibacter hansenii  | hypothetical protein [Komagataeibacter hansenii].                | GCF_014843995.1 |
| WP_192393207.1 | HetE-N1→ TPR+GreAB-C+PIN*→                   | TPR+GreAB-C+PIN           | 1117 | -        | Gammaproteobacteria | Methylomonas sp. EbB       | hypothetical protein [Methylomonas sp. EbB].                     | GCF_903064685.1 |
| WP_192433772.1 | HEPN→ REase+TPR+TPR+GreAB-C+PIN*→            | REase+TPR+TPR+GreAB-C+PIN | 1339 | -        | Alphaproteobacteria | Ensifer sp. ENS11          | hypothetical protein [Ensifer sp. ENS11].                        | GCF_014851895.1 |
| WP_192504527.1 | HetE-N1→ TPR+GreAB-C+PIN*→                   | TPR+GreAB-C+PIN           | 1119 | -        | Gammaproteobacteria | Rouxiella badensis         | hypothetical protein [Rouxiella badensis].                       | GCF_014859005.1 |
| WP_192836185.1 | HetE-N1→ TPR+GreAB-C+PIN*→                   | TPR+GreAB-C+PIN           | 1092 | -        | Gammaproteobacteria | Acinetobacter oleivorans   | hypothetical protein [Acinetobacter oleivorans].                 | GCF_014876825.1 |
| WP_193132365.1 | HetE-N1→ TPR+GreAB-C+PIN+TM+TM*→             | TPR+GreAB-C+PIN+TM+TM     | 1086 | -        | Gammaproteobacteria | Enterobacter hormaechei    | hypothetical protein, partial [Enterobacter hormaechei].         | GCF_014901495.1 |
| WP_193343548.1 | HetE-N1→ TPR+GreAB-C+PIN*→?→ PhospholipaseD→ | TPR+GreAB-C+PIN           | 1103 | -        | Gammaproteobacteria | Halomonas elongata         | hypothetical protein [Halomonas elongata].                       | GCF_014926355.1 |
| WP_193426153.1 | TPR+PIN*→                                    | TPR+PIN                   | 1217 | -        | Firmicutes          | Priestia aryabhatai        | hypothetical protein [Priestia aryabhatai].                      | GCF_014932885.1 |
| WP_193843312.1 | HetE-N1→ TPR+GreAB-C+PIN*→                   | TPR+GreAB-C+PIN           | 1090 | -        | Gammaproteobacteria | Serratia marcescens        | hypothetical protein [Serratia marcescens].                      | GCF_015160915.1 |
| WP_194030396.1 | PNPase+TPR+GreAB-C+PIN*→                     | PNPase+TPR+GreAB-C+PIN    | 1392 | -        | Cyanobacteria       | Lusitaniella coriacea      | hypothetical protein [Lusitaniella coriacea].                    | GCF_015207425.1 |
| WP_194552914.1 | TPR+GreAB-C+PIN*→                            | TPR+GreAB-C+PIN           | 1236 | -        | Gammaproteobacteria | Vibrio anguillarum         | hypothetical protein [Vibrio anguillarum].                       | GCF_015343355.1 |
| WP_194640651.1 | TPR+GreAB-C+PIN*→                            | TPR+GreAB-C+PIN           | 1123 | -        | Bacteroidetes       | Flavobacterium sp. HJJ     | hypothetical protein [Flavobacterium sp. HJJ].                   | GCF_015351475.1 |
| WP_194689942.1 | REase+TPR+GreAB-C+PIN*→                      | REase+TPR+GreAB-C+PIN     | 1323 | -        | Alphaproteobacteria | unclassified Gluconobacter | MULTISPECIES: hypothetical protein [unclassified Gluconobacter]. | GCF_015353155.1 |
| WP_194782158.1 | TPR+PIN*→                                    | TPR+PIN                   | 1183 | -        | Actinobacteria      | Arthrobacter gandavensis   | hypothetical protein [Arthrobacter gandavensis].                 | GCF_015355785.1 |
| WP_194849029.1 | HetE-N1→ TPR+GreAB-C+PIN*→                   | TPR+GreAB-C+PIN           | 1094 | -        | Gammaproteobacteria | Escherichia coli           | hypothetical protein [Escherichia coli].                         | GCF_015356625.1 |
| WP_194908878.1 | TPR+PIN*→                                    | TPR+PIN                   | 1322 | -        | Actinobacteria      | Catenulispora rubra        | hypothetical protein [Catenulispora rubra].                      | GCF_015356825.1 |
| WP_195550768.1 | TM+TM+TPR+PIN*→                              | TM+TM+TPR+PIN             | 1183 | -        | Bacteroidetes       | Bacteroides uniformis      | hypothetical protein [Bacteroides uniformis].                    | GCF_015557045.1 |
| WP_195789843.1 | REase+TPR+GreAB-C+PIN*→                      | REase+TPR+GreAB-C+PIN     | 1310 | -        | Alphaproteobacteria | Bradyrhizobium genosp. L   | hypothetical protein [Bradyrhizobium genosp. L].                 | GCF_015624485.1 |
| WP_196103949.1 | TPR+GreAB-C+PIN*→                            | TPR+GreAB-C+PIN           | 468  | -        | Alphaproteobacteria | Pontivivens sp. MT2928     | hypothetical protein [Pontivivens sp. MT2928].                   | GCF_015679265.1 |
| WP_196165874.1 | TPR+GreAB-C+PIN*→                            | TPR+GreAB-C+PIN           | 1139 | -        | Gammaproteobacteria | Pseudomonas monteilii      | hypothetical protein [Pseudomonas monteilii].                    | GCF_015680735.1 |
| WP_196184162.1 | REase+TPR+GreAB-C+PIN*→                      | REase+TPR+GreAB-C+PIN     | 1545 | -        | Gammaproteobacteria | Pseudomonas asiatica       | hypothetical protein [Pseudomonas asiatica].                     | GCF_015680805.1 |
| WP_196343881.1 | HetE-N1→ TPR+GreAB-C+PIN*→                   | TPR+GreAB-C+PIN           | 1106 | -        | Gammaproteobacteria | Enterobacter hormaechei    | hypothetical protein [Enterobacter hormaechei].                  | GCF_015704145.1 |
| WP_196402364.1 | REase+TPR+TPR+GreAB-C+PIN*→                  | REase+TPR+TPR+GreAB-C+PIN | 1304 | -        | Alphaproteobacteria | Methylocystis sp. H62      | hypothetical protein [Methylocystis sp. H62].                    | GCF_015709515.1 |
| WP_197022618.1 | REase+TPR+GreAB-C+PIN*→                      | REase+TPR+GreAB-C+PIN     | 1388 | -        | Betaproteobacteria  | Comamonas aquatica         | hypothetical protein [Comamonas aquatica].                       | GCF_000590985.1 |
| WP_197265512.1 | TPR+PIN*→                                    | TPR+PIN                   | 1231 | -        | Firmicutes          | Fictibacillus sp. 23RED33  | hypothetical protein [Fictibacillus sp. 23RED33].                | GCF_015903925.1 |
| WP_197283942.1 | GreAB-C+PIN*→                                | GreAB-C+PIN               | 553  | -        | Alphaproteobacteria | Rhizobium acidisoli        | hypothetical protein, partial [Rhizobium acidisoli].             | GCF_001297245.1 |
| WP_197310646.1 | REase+TPR+TPR+GreAB-C+PIN*→                  | REase+TPR+TPR+GreAB-C+PIN | 1326 | -        | Alphaproteobacteria | Methylobrevus sp. L22      | hypothetical protein [Methylobrevus sp. L22].                    | GCF_015904235.1 |
| WP_197451745.1 | REase+TPR+GreAB-C+PIN*→                      | REase+TPR+GreAB-C+PIN     | 1195 | -        | Planctomycetes      | Rosistilla oblonga         | GreA/GreB family elongation factor [Rosistilla oblonga].         | GCF_007751715.1 |
| WP_197873110.1 | TPR+GreAB-C+PIN*→                            | TPR+GreAB-C+PIN           | 1139 | -        | Gammaproteobacteria | Pseudomonas lutea          | hypothetical protein [Pseudomonas lutea].                        | GCF_016009245.1 |
| WP_198113276.1 | TPR+GreAB-C+PIN*→   <-HTH+HTH                | TPR+GreAB-C+PIN           | 872  | -        | Betaproteobacteria  | Burkholderia contaminans   | hypothetical protein [Burkholderia contaminans].                 | GCF_016092105.1 |
| WP_198215548.1 | HetE-N1→ TPR+GreAB-C+PIN*→                   | TPR+GreAB-C+PIN           | 1126 | -        | Gammaproteobacteria | Gilliamella sp. M0320      | hypothetical protein [Gilliamella sp. M0320].                    | GCF_016101635.1 |
| WP_198575560.1 | REase+TPR+GreAB-C+PIN*→                      | REase+TPR+GreAB-C+PIN     | 1332 | -        | Alphaproteobacteria | Caulobacter hibisci        | DUF4365 domain-containing protein [Caulobacter hibisci].         | GCF_016135805.1 |
| WP_198597141.1 | HetE-N1→?→ GreAB-C*→                         | GreAB-C                   | 475  | -        | Gammaproteobacteria | Vibrio splendidus          | hypothetical protein [Vibrio splendidus].                        | GCF_002877525.1 |
| WP_198628691.1 | TPR+GreAB-C+PIN*→                            | TPR+GreAB-C+PIN           | 1231 | -        | Bacteroidetes       | Salagentibacter sp. F63223 | hypothetical protein [Salagentibacter sp. F63223].               | GCF_016236915.1 |
| WP_198694995.1 | REase+TPR+GreAB-C+PIN*→                      | REase+TPR+GreAB-C+PIN     | 1436 | -        | Gammaproteobacteria | Pseudomonas viridiflava    | hypothetical protein [Pseudomonas viridiflava].                  | GCF_016308365.1 |

| acc            | operon                                  | architecture                 | len  | gen.name | taxend              | species                                       | define                                                            | gca             |
|----------------|-----------------------------------------|------------------------------|------|----------|---------------------|-----------------------------------------------|-------------------------------------------------------------------|-----------------|
| WP_198710862.1 | REase+TPR+GreAB-C+PIN*→                 | REase+TPR+GreAB-C+PIN        | 1321 | -        | Gammaproteobacteria | <i>Pseudomonas syringae</i>                   | DUF4365 domain-containing protein [Pseudomonas syringae].         | GCF_016308175.1 |
| WP_198739586.1 | HetE-N1→ TPR+GreAB-C+PIN*→              | TPR+GreAB-C+PIN              | 1106 | -        | Gammaproteobacteria | <i>Enterobacter hormaechei</i>                | hypothetical protein [Enterobacter hormaechei].                   | GCF_016342225.1 |
| WP_198742183.1 | HetE-N1→ TPR+GreAB-C+PIN*→              | TPR+GreAB-C+PIN              | 1106 | -        | Gammaproteobacteria | <i>Enterobacter hormaechei</i>                | hypothetical protein [Enterobacter hormaechei].                   | GCF_016342135.1 |
| WP_198830693.1 | REase+TPR+GreAB-C+PIN*→                 | REase+TPR+GreAB-C+PIN        | 1441 | -        | Gammaproteobacteria | <i>Pseudomonas sp. MF5691</i>                 | hypothetical protein [Pseudomonas sp. MF5691].                    | GCF_016405645.1 |
| WP_198862330.1 | REase+TPR+GreAB-C+PIN*→                 | REase+TPR+GreAB-C+PIN        | 1324 | -        | Gammaproteobacteria | <i>Pseudomonas carnis</i>                     | DUF4365 domain-containing protein [Pseudomonas carnis].           | GCF_016405215.1 |
| WP_199041247.1 | REase+TPR+GreAB-C+PIN*→                 | REase+TPR+GreAB-C+PIN        | 1250 | -        | Gammaproteobacteria | <i>Dyella sp. ASV24</i>                       | hypothetical protein [Dyella sp. ASV24].                          | GCF_016428905.1 |
| WP_199059400.1 | REase+TPR+TPR+GreAB-C+PIN*→             | REase+TPR+TPR+GreAB-C+PIN    | 1334 | -        | Alphaproteobacteria | <i>Brevundimonas sp. ASV9</i>                 | hypothetical protein [Brevundimonas sp. ASV9].                    | GCF_016429195.1 |
| WP_199059891.1 | REase+TPR+GreAB-C+PIN*→                 | REase+TPR+GreAB-C+PIN        | 1302 | -        | Alphaproteobacteria | <i>Brevundimonas sp. ASV9</i>                 | hypothetical protein [Brevundimonas sp. ASV9].                    | GCF_016429195.1 |
| WP_199133123.1 | TPR+GreAB-C+PIN*→                       | TPR+GreAB-C+PIN              | 1258 | -        | Bacteroidetes       | <i>Pedobacter sp. ASV17</i>                   | hypothetical protein [Pedobacter sp. ASV17].                      | GCF_016429065.1 |
| WP_199161798.1 | TPR+GreAB-C+PIN*→                       | TPR+GreAB-C+PIN              | 1140 | -        | Bacteroidetes       | <i>Elizabethkingia sp. ASV34</i>              | hypothetical protein [Elizabethkingia sp. ASV34].                 | GCF_016428745.1 |
| WP_199216499.1 | TPR+PIN*→                               | TPR+PIN                      | 1215 | -        | Actinobacteria      | <i>Streptomyces sp. I5</i>                    | hypothetical protein [Streptomyces sp. I5].                       | GCF_016432735.1 |
| WP_199272510.1 | REase+TPR+GreAB-C+PIN*→                 | REase+TPR+GreAB-C+PIN        | 1359 | -        | Betaproteobacteria  | <i>Paraburkholderia acidisoli</i>             | hypothetical protein [Paraburkholderia acidisoli].                | GCF_009789675.1 |
| WP_199515964.1 | TM+TPR+PIN*→                            | TM+TPR+PIN                   | 1145 | -        | Actinobacteria      | <i>Pseudosporangium sp. NEAU-24</i>           | tetratricopeptide repeat protein [Pseudosporangium sp. NEAU-24].  | GCF_016464385.1 |
| WP_199591321.1 | REase+TPR+GreAB-C+PIN*→                 | REase+TPR+GreAB-C+PIN        | 1505 | -        | Betaproteobacteria  | <i>Pelomonas sp. OAE585</i>                   | hypothetical protein [Pelomonas sp. OAE585].                      | GCF_016467315.1 |
| WP_199660563.1 | TPR+GreAB-C+PIN*→                       | TPR+GreAB-C+PIN              | 1035 | -        | Gammaproteobacteria | <i>Klebsiella quasipneumoniae</i>             | hypothetical protein, partial [Klebsiella quasipneumoniae].       | GCF_016491635.1 |
| WP_199707330.1 | REase→ PIN*→                            | PIN                          | 932  | -        | Actinobacteria      | <i>Antrihabitans sp. YC3-6</i>                | hypothetical protein [Antrihabitans sp. YC3-6].                   | GCF_016482825.1 |
| WP_199727385.1 | REase+TPR+GreAB-C+PIN*→                 | REase+TPR+GreAB-C+PIN        | 1488 | -        | Gammaproteobacteria | <i>Pseudomonas syringae</i> group genomsp. 7. | hypothetical protein [Pseudomonas syringae group genomsp. 7].     | GCF_003703295.1 |
| WP_199743158.1 | REase+TPR+GreAB-C+PIN*→                 | REase+TPR+GreAB-C+PIN        | 1009 | -        | Alphaproteobacteria | <i>Sphingomonas ginsenosidivorax</i>          | tetratricopeptide repeat protein [Sphingomonas ginsenosidivorax]. | GCF_007995065.1 |
| WP_199871858.1 | HetE-N1→ HetE-N1+TPR+GreAB-C+PIN*→      | HetE-N1+TPR+GreAB-C+PIN      | 1088 | -        | Gammaproteobacteria | <i>Vibrio anguillarum</i>                     | hypothetical protein [Vibrio anguillarum].                        | GCF_015350415.1 |
| WP_200204777.1 | HetE-N1→ TPR+GreAB-C+PIN*→              | TPR+GreAB-C+PIN              | 1116 | -        | Gammaproteobacteria | <i>Marinobacter sp. 1-3A</i>                  | hypothetical protein [Marinobacter sp. 1-3A].                     | GCF_016597775.1 |
| WP_200282902.1 | TPR+PIN*→                               | TPR+PIN                      | 1263 | -        | Verrucomicrobia     | <i>Haloferula rosea</i>                       | hypothetical protein [Haloferula rosea].                          | GCF_016595525.1 |
| WP_200597934.1 | HetE-N1→ TPR+GreAB-C+PIN*→              | TPR+GreAB-C+PIN              | 1112 | -        | Gammaproteobacteria | <i>Pseudomonas stutzeri</i>                   | hypothetical protein [Pseudomonas stutzeri].                      | GCF_016622345.1 |
| WP_200602419.1 | REase+TPR+GreAB-C+PIN*→                 | REase+TPR+GreAB-C+PIN        | 1441 | -        | Gammaproteobacteria | <i>Pseudomonas sp. S44</i>                    | hypothetical protein [Pseudomonas sp. S44].                       | GCF_016624805.1 |
| WP_201009307.1 | REase+PIN*→                             | REase+PIN                    | 1247 | -        | Actinobacteria      | <i>Rhodococcus sp. NKCM2511</i>               | DUF4365 domain-containing protein [Rhodococcus sp. NKCM2511].     | GCF_014905595.1 |
| WP_201090676.1 | HetE-N1→ TPR+GreAB-C+PIN*→              | TPR+GreAB-C+PIN              | 1083 | -        | Gammaproteobacteria | <i>Entomomonas sp. F2A</i>                    | hypothetical protein [Entomomonas sp. F2A].                       | GCF_016653615.1 |
| WP_201420192.1 | REase+TPR+GreAB-C+PIN*→                 | REase+TPR+GreAB-C+PIN        | 1442 | -        | Gammaproteobacteria | <i>Pseudomonas syringae</i>                   | hypothetical protein [Pseudomonas syringae].                      | GCF_016694755.2 |
| WP_201621921.1 | REase+TPR+GreAB-C+PIN*→                 | REase+TPR+GreAB-C+PIN        | 1244 | -        | Gammaproteobacteria | <i>Psychrobacter urativorans</i>              | hypothetical protein [Psychrobacter urativorans].                 | GCF_904846695.1 |
| WP_201915404.1 | REase+TPR+GreAB-C+PIN*→                 | REase+TPR+GreAB-C+PIN        | 1321 | -        | Gammaproteobacteria | <i>Pseudomonas fluorescens</i>                | DUF4365 domain-containing protein [Pseudomonas fluorescens].      | GCF_016728065.1 |
| WP_201921162.1 | HetE-N1→ TPR+GreAB-C+PIN*→              | TPR+GreAB-C+PIN              | 1094 | -        | Gammaproteobacteria | <i>Aeromonas caviae</i>                       | hypothetical protein [Aeromonas caviae].                          | GCF_016729435.1 |
| WP_201996904.1 | HetE-N1→ MNS-Npun2340+TPR+GreAB-C+PIN*→ | MNS-Npun2340+TPR+GreAB-C+PIN | 1094 | -        | Gammaproteobacteria | <i>Aeromonas caviae</i>                       | hypothetical protein [Aeromonas caviae].                          | GCF_016728955.1 |
| WP_202685167.1 | REase+TPR+GreAB-C+PIN*→                 | REase+TPR+GreAB-C+PIN        | 1019 | -        | Alphaproteobacteria | <i>Skermanella mucosa</i>                     | hypothetical protein, partial [Skermanella mucosa].               | GCF_016765655.1 |
| WP_202722978.1 | HetE-N1→ TPR+GreAB-C+PIN*→              | TPR+GreAB-C+PIN              | 1141 | -        | Gammaproteobacteria | <i>Shewanella schlegeliana</i>                | hypothetical protein [Shewanella schlegeliana].                   | GCF_016765635.1 |
| WP_202727723.1 | HetE-N1→ TPR+GreAB-C+PIN*→              | TPR+GreAB-C+PIN              | 1094 | -        | Gammaproteobacteria | <i>Serratia fonticola</i>                     | hypothetical protein [Serratia fonticola].                        | GCF_016770915.1 |
| WP_203042134.1 | HetE-N1→ TPR+GreAB-C+PIN*→              | TPR+GreAB-C+PIN              | 1106 | -        | Gammaproteobacteria | <i>Enterobacter hormaechei</i>                | hypothetical protein [Enterobacter hormaechei].                   | GCF_016791625.1 |
| WP_203341318.1 | TPR+PIN*→                               | TPR+PIN                      | 1141 | -        | Firmicutes          | <i>Planomicrobium sp. REN14</i>               | hypothetical protein [Planomicrobium sp. REN14].                  | GCF_016820615.1 |
| WP_203380482.1 | REase+TPR+GreAB-C+PIN*→                 | REase+TPR+GreAB-C+PIN        | 1231 | -        | Actinobacteria      | <i>Actinoplanes sp. LDG1-06</i>               | DUF4365 domain-containing protein [Actinoplanes sp. LDG1-06].     | GCF_016834655.1 |
| WP_203735920.1 | TPR+PIN*→                               | TPR+PIN                      | 1176 | -        | Actinobacteria      | <i>Actinoplanes durhamensis</i>               | hypothetical protein [Actinoplanes durhamensis].                  | GCF_016862175.1 |
| WP_203841861.1 | REase+TPR+GreAB-C+PIN*→                 | REase+TPR+GreAB-C+PIN        | 1259 | -        | Actinobacteria      | <i>Actinoplanes humidus</i>                   | DUF4365 domain-containing protein [Actinoplanes humidus].         | GCF_016862215.1 |
| WP_204008964.1 | REase+TPR+GreAB-C+PIN*→                 | REase+TPR+GreAB-C+PIN        | 1356 | -        | Actinobacteria      | <i>Micromonospora andamanensis</i>            | hypothetical protein [Micromonospora andamanensis].               | GCF_016863495.1 |
| WP_204028926.1 | REase+TPR+GreAB-C+PIN*→                 | REase+TPR+GreAB-C+PIN        | 1338 | -        | Actinobacteria      | <i>Sinosporangium siamense</i>                | hypothetical protein [Sinosporangium siamense].                   | GCF_016863435.1 |

| acc            | operon                                   | architecture              | len  | gen.name | taxend              | species                                   | define                                                              | gca             |
|----------------|------------------------------------------|---------------------------|------|----------|---------------------|-------------------------------------------|---------------------------------------------------------------------|-----------------|
| WP_204127404.1 | HetE-N1→ TPR+GreAB-C+PIN*→   <-HNH       | TPR+GreAB-C+PIN           | 1110 | -        | Gammaproteobacteria | <i>Pseudomonas</i> sp. RDP1               | hypothetical protein [Pseudomonas sp. RDP1].                        | GCF_016887885.1 |
| WP_204370319.1 | TPR+GreAB-C+PIN*→                        | TPR+GreAB-C+PIN           | 860  | -        | Betaproteobacteria  | <i>Burkholderia cepacia</i>               | tetratricopeptide repeat protein, partial [Burkholderia cepacia].   | GCF_001052915.1 |
| WP_204511064.1 | REase+TPR+GreAB-C+PIN*→                  | REase+TPR+GreAB-C+PIN     | 1349 | -        | Alphaproteobacteria | <i>Bradyrhizobium canariense</i>          | tetratricopeptide repeat protein [Bradyrhizobium canariense].       | GCF_016907215.1 |
| WP_204648469.1 | TPR+PIN*→                                | TPR+PIN                   | 1235 | -        | Firmicutes          | <i>Gemmiger formicilis</i>                | hypothetical protein [Gemmiger formicilis].                         | GCF_016900095.1 |
| WP_204732305.1 | REase+TPR+GreAB-C+PIN*→                  | REase+TPR+GreAB-C+PIN     | 1447 | -        | Betaproteobacteria  | <i>Hydrogenophaga laconesensis</i>        | hypothetical protein [Hydrogenophaga laconesensis].                 | GCF_016909585.1 |
| WP_204856598.1 | REase+PIN*→                              | REase+PIN                 | 1247 | -        | Actinobacteria      | <i>Rhodococcus fascians</i>               | DUF4365 domain-containing protein [Rhodococcus fascians].           | GCF_016909505.1 |
| WP_204934318.1 | REase+TPR+GreAB-C+PIN*→                  | REase+TPR+GreAB-C+PIN     | 1321 | -        | Gammaproteobacteria | <i>Pseudomonas stutzeri</i>               | DUF4365 domain-containing protein [Pseudomonas stutzeri].           | GCF_016909445.1 |
| WP_204944661.1 | TPR+PIN*→                                | TPR+PIN                   | 1203 | -        | Actinobacteria      | <i>Micromonospora luteifusca</i>          | hypothetical protein [Micromonospora luteifusca].                   | GCF_016907275.1 |
| WP_205045164.1 | TPR+PIN*→                                | TPR+PIN                   | 1168 | -        | Actinobacteria      | <i>Streptomyces bryophytorum</i>          | hypothetical protein [Streptomyces bryophytorum].                   | GCF_017164735.1 |
| WP_205483425.1 | REase+TPR+GreAB-C+PIN→ TPR→   <-?  PIN*→ | PIN                       | 365  | -        | Gammaproteobacteria | <i>Pseudomonas</i> sp. 15A4               | hypothetical protein [Pseudomonas sp. 15A4].                        | GCF_016925575.1 |
| WP_206013307.1 | HetE-N1→ TPR+GreAB-C+PIN*→               | TPR+GreAB-C+PIN           | 1090 | -        | Gammaproteobacteria | <i>Pseudoalteromonas</i> sp. Z9A6         | hypothetical protein [Pseudoalteromonas sp. Z9A6].                  | GCF_011378805.1 |
| WP_206497574.1 | REase+PIN*→                              | REase+PIN                 | 1021 | -        | Actinobacteria      | <i>Rhodococcus</i> sp. KRD175             | hypothetical protein [Rhodococcus sp. KRD175].                      | GCF_017168275.1 |
| WP_206556849.1 | HetE-N1→ TPR+GreAB-C+PIN*→               | TPR+GreAB-C+PIN           | 1116 | -        | Gammaproteobacteria | <i>Marinobacter daepoensis</i>            | hypothetical protein [Marinobacter daepoensis].                     | GCF_017255165.1 |
| WP_206628468.1 | HetE-N1→ TPR+GreAB-C+PIN*→               | TPR+GreAB-C+PIN           | 1116 | -        | Gammaproteobacteria | <i>Vibrio vulnificus</i>                  | hypothetical protein [Vibrio vulnificus].                           | GCF_017291135.1 |
| WP_206676035.1 | HTH→ SIG+TM→ TPR+GreAB-C+PIN*→           | TPR+GreAB-C+PIN           | 1125 | -        | Bacteroidetes       | <i>Capnocytophaga canis</i>               | hypothetical protein [Capnocytophaga canis].                        | GCF_013276255.1 |
| WP_206820216.1 | REase+TPR+GreAB-C+PIN*→                  | REase+TPR+GreAB-C+PIN     | 1215 | -        | Actinobacteria      | <i>Microbacterium esteraromaticum</i>     | DUF4365 domain-containing protein [Microbacterium esteraromaticum]. | GCF_017303135.1 |
| WP_206852091.1 | REase+TPR+GreAB-C+PIN*→                  | REase+TPR+GreAB-C+PIN     | 1289 | -        | Gammaproteobacteria | <i>Marinobacter hydrocarbonoclasticus</i> | hypothetical protein [Marinobacter hydrocarbonoclasticus].          | GCF_017303195.1 |
| WP_207418840.1 | TPR+GreAB-C+PIN*→   <-HTH+HTH            | TPR+GreAB-C+PIN           | 872  | -        | Betaproteobacteria  | <i>Burkholderia pseudomallei</i>          | hypothetical protein [Burkholderia pseudomallei].                   | GCF_017356705.1 |
| WP_207505725.1 | Mbetalac→ Trypsin+TPR+GreAB-C+PIN*→      | Trypsin+TPR+GreAB-C+PIN   | 1362 | -        | Bacteroidetes       | <i>Telluribacter humicola</i>             | serine protease [Telluribacter humicola].                           | GCF_017355935.1 |
| WP_207509935.1 | Mbetalac→ TPR+GreAB-C+PIN*→              | TPR+GreAB-C+PIN           | 1342 | -        | Bacteroidetes       | <i>Telluribacter humicola</i>             | hypothetical protein [Telluribacter humicola].                      | GCF_017355935.1 |
| WP_207967591.1 | HetE-N1→ TPR+GreAB-C+PIN*→               | TPR+GreAB-C+PIN           | 1090 | -        | Gammaproteobacteria | <i>Yersinia pseudotuberculosis</i>        | hypothetical protein [Yersinia pseudotuberculosis].                 | GCF_017498805.1 |
| WP_207993663.1 | HetE-N1→ TPR+GreAB-C+PIN*→               | TPR+GreAB-C+PIN           | 1122 | -        | Gammaproteobacteria | <i>Yersinia pseudotuberculosis</i>        | hypothetical protein [Yersinia pseudotuberculosis].                 | GCF_017498865.1 |
| WP_208133228.1 | TPR+GreAB-C+PIN*→                        | TPR+GreAB-C+PIN           | 1306 | -        | Bacteroidetes       | <i>Siccationidurans ginsengisoli</i>      | hypothetical protein [Siccationidurans ginsengisoli].               | GCF_017571525.1 |
| WP_208209475.1 | REase+TPR+GreAB-C+PIN*→                  | REase+TPR+GreAB-C+PIN     | 1543 | -        | Gammaproteobacteria | <i>Pseudomonas asiatica</i>               | hypothetical protein [Pseudomonas asiatica].                        | GCF_017582485.1 |
| WP_208467197.1 | TPR+PIN*→                                | TPR+PIN                   | 1140 | -        | Actinobacteria      | <i>Actinoplanes</i> sp. NEAU-H7           | hypothetical protein [Actinoplanes sp. NEAU-H7].                    | GCF_017592555.1 |
| WP_208622113.1 | HetE-N1→ TPR+GreAB-C+PIN*→               | TPR+GreAB-C+PIN           | 1022 | -        | Gammaproteobacteria | <i>Shewanella indica</i>                  | hypothetical protein, partial [Shewanella indica].                  | GCF_002836975.1 |
| WP_208660584.1 | HetE-N1→ TPR+GreAB-C+PIN*→               | TPR+GreAB-C+PIN           | 1087 | -        | Gammaproteobacteria | <i>Shewanella decolorationis</i>          | hypothetical protein [Shewanella decolorationis].                   | GCF_007923045.1 |
| WP_208757658.1 | TPR+PIN*→                                | TPR+PIN                   | 1184 | -        | Firmicutes          | <i>Priestia megaterium</i>                | hypothetical protein [Priestia megaterium].                         | GCF_002872495.1 |
| WP_209187630.1 | REase+TPR+GreAB-C+PIN→ PIN→              | REase+TPR+GreAB-C+PIN     | 359  | -        | Alphaproteobacteria | <i>Rhizobium</i> sp. L245/93              | hypothetical protein [Rhizobium sp. L245/93].                       | GCF_017741845.1 |
| WP_209187631.1 | -                                        | -                         | 978  | -        | Alphaproteobacteria | <i>Rhizobium</i> sp. L245/93              | hypothetical protein [Rhizobium sp. L245/93].                       | GCF_017741845.1 |
| WP_209302601.1 | X+PIN*→                                  | X+PIN                     | 1221 | -        | Firmicutes          | <i>Anaerostipes hadrus</i>                | hypothetical protein [Anaerostipes hadrus].                         | GCF_017776445.1 |
| WP_209570872.1 | TPR+GreAB-C+PIN*→?→   <-TPR              | TPR+GreAB-C+PIN           | 1131 | -        | Bacteroidetes       | <i>Flavobacterium</i> sp. 1750            | hypothetical protein [Flavobacterium sp. 1750].                     | GCF_017833855.1 |
| WP_209629149.1 | <-Calcineurin<-?  ?→?→?→ TPR+PIN*→       | TPR+PIN                   | 1016 | -        | Euryarchaeota       | <i>Methanofollis</i> sp. W23              | hypothetical protein [Methanofollis sp. W23].                       | GCF_017875325.1 |
| WP_209829315.1 | TPR+PIN*→                                | TPR+PIN                   | 1242 | -        | Actinobacteria      | <i>Cellulosimicrobium</i> sp. BE325       | hypothetical protein [Cellulosimicrobium sp. BE325].                | GCF_017834095.1 |
| WP_210277108.1 | REase+TPR+TPR+GreAB-C+PIN*→              | REase+TPR+TPR+GreAB-C+PIN | 1346 | -        | Alphaproteobacteria | <i>Rhizobium leguminosarum</i>            | hypothetical protein [Rhizobium leguminosarum].                     | GCF_014138515.1 |
| WP_210311799.1 | TPR+GreAB-C+PIN*→                        | TPR+GreAB-C+PIN           | 812  | -        | Alphaproteobacteria | <i>Rhizobium soli</i>                     | hypothetical protein, partial [Rhizobium soli].                     | GCF_014207075.1 |
| WP_210441888.1 | HetE-N1→ TPR+GreAB-C+PIN*→               | TPR+GreAB-C+PIN           | 1089 | -        | Gammaproteobacteria | <i>Vibrio crassostreae</i>                | hypothetical protein [Vibrio crassostreae].                         | GCF_017917835.1 |
| WP_210504843.1 | HetE-N1→ TPR+GreAB-C+PIN*→               | TPR+GreAB-C+PIN           | 1123 | -        | Gammaproteobacteria | <i>Pantoea ananatis</i>                   | hypothetical protein [Pantoea ananatis].                            | GCF_017920595.1 |
