# Supplementary material for: Bacterial death and TRADD-N domains help define novel apoptosis and immunity mechanisms shared by prokaryotes and metazoans
Source: eLife journal article supplement (doi:10.7554/elife.70394), 2021-06-01

Figure 3 - Figure supplement 1. Maximum-likelihood Phylogenetic tree of the TRADD-N family of domains

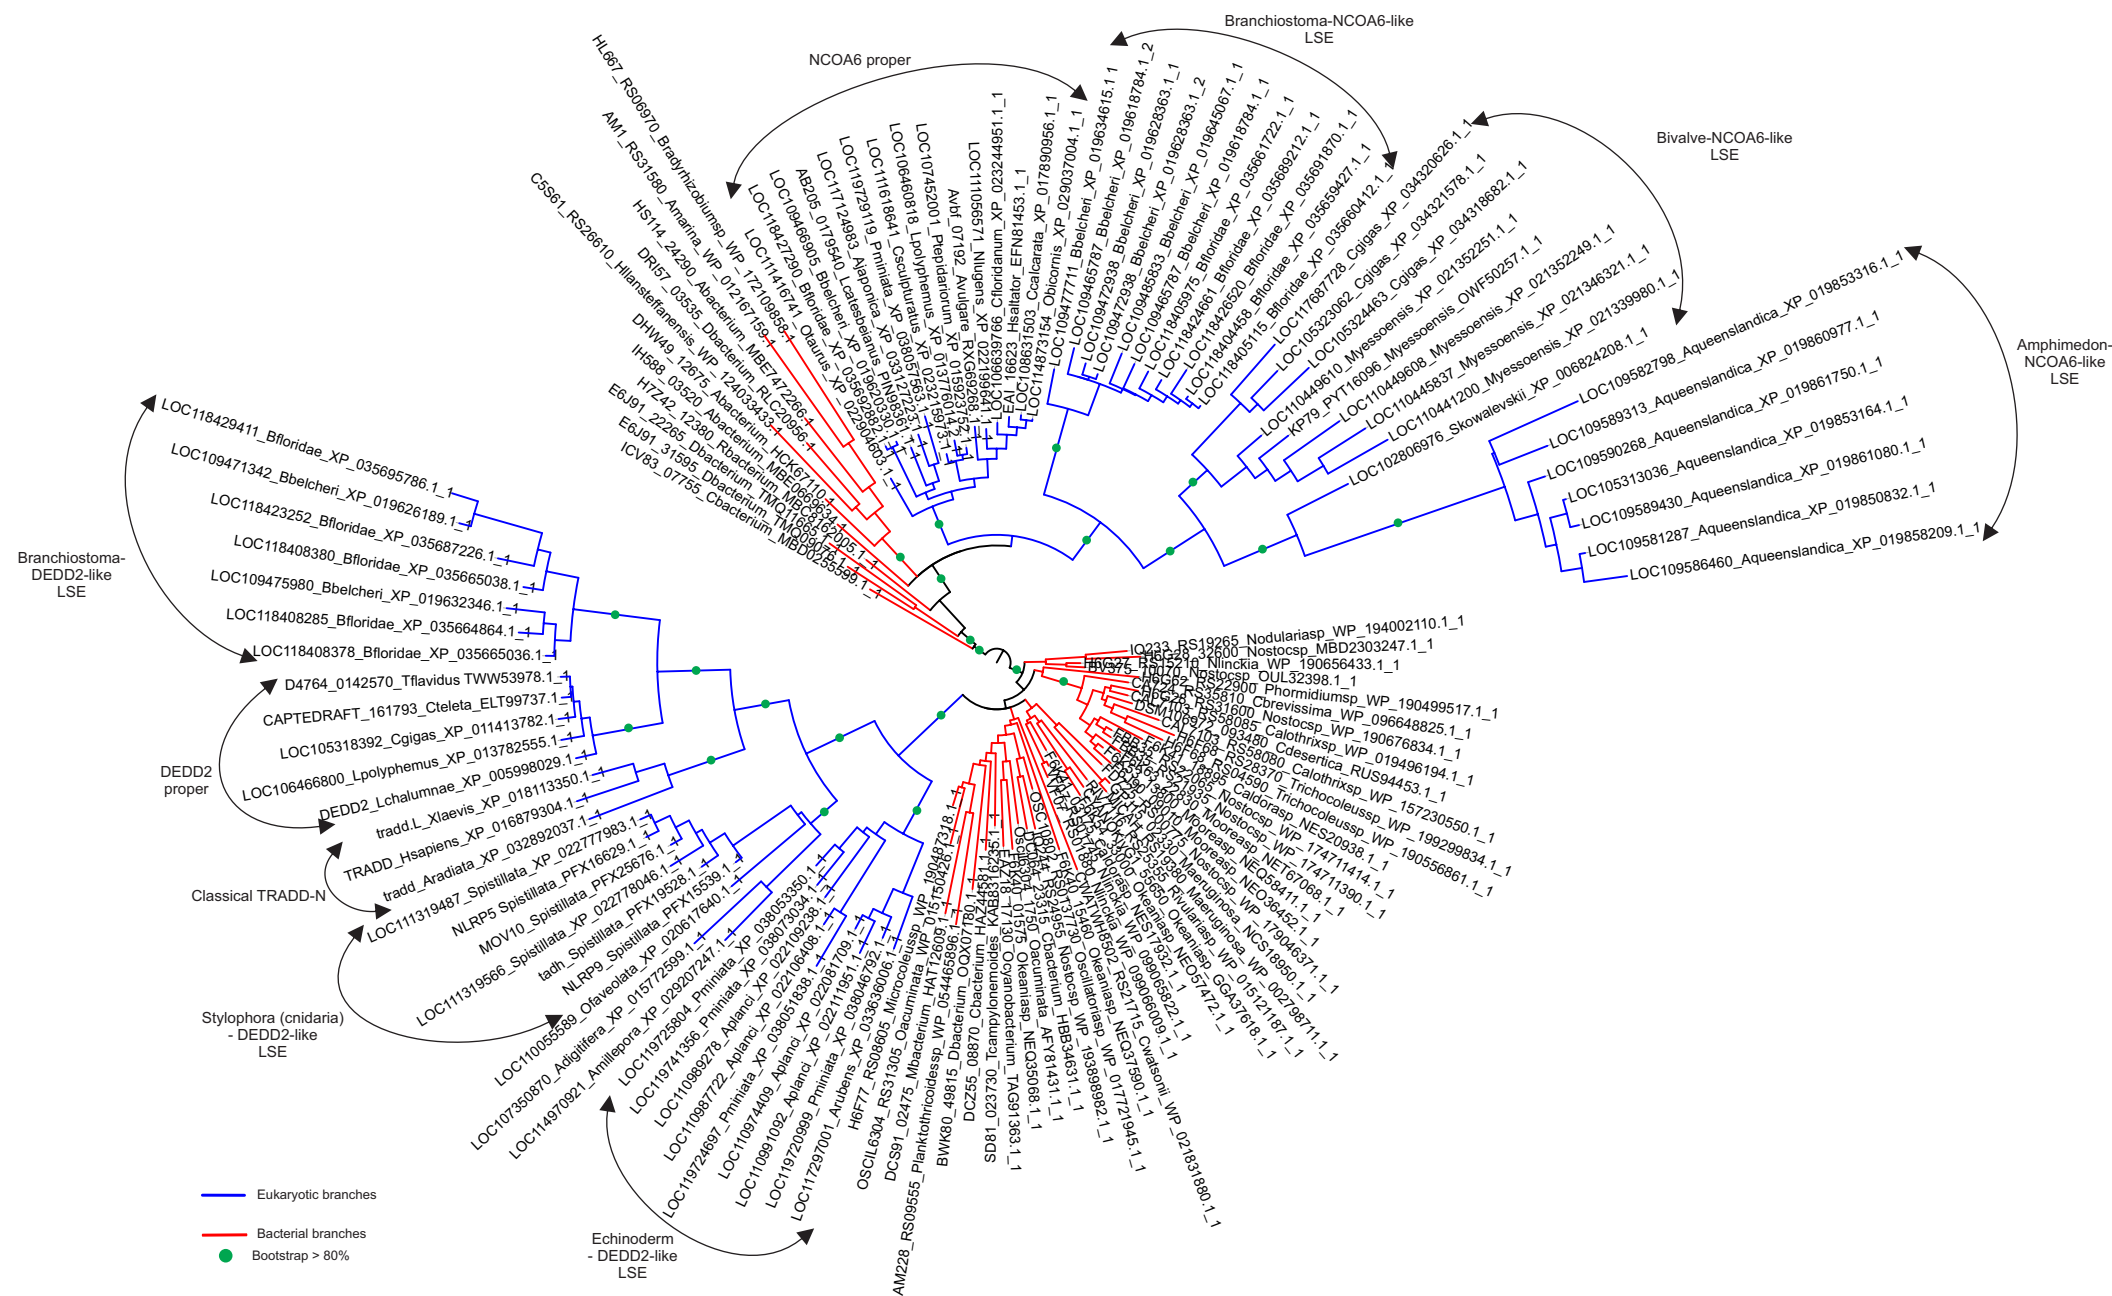

Supplement: supp [file elife_poa_e70394_Figure_3_figure_supplement_1.pdf › elife_poa_e70394_Figure_3_figure_supplement_1.pdf]
