# Supplementary material for: Bacterial death and TRADD-N domains help define novel apoptosis and immunity mechanisms shared by prokaryotes and metazoans
Source: eLife. 2021 Jun 1;10:e70394. doi: 10.7554/eLife.70394 (PMC8195603; doi:10.7554/eLife.70394)
Supplement: Supplementary file 1. [file elife-70394-supp1.csv]

Query domain	Hit domain	p-value	"-log10(p-value)"
EAD1	EAD1	3.10E-19	18.51
EAD1	EAD7	8.20E-09	8.086
EAD1	bDLD2	1.10E-07	6.959
EAD1	EAD6	4.00E-06	5.398
EAD1	EAD8	1.30E-05	4.886
EAD1	EAD2	3.00E-04	3.523
EAD1	EAD5	0.00042	3.377
EAD10	EAD10	1.20E-31	30.92
EAD11	EAD11	4.80E-25	24.32
EAD2	EAD2	3.20E-27	26.49
EAD2	EAD8	3.90E-05	4.409
EAD2	EAD5	0.00049	3.31
EAD4	EAD4	3.40E-29	28.47
EAD5	EAD5	5.10E-51	50.29
EAD5	EAD8	8.90E-07	6.051
EAD5	EAD1	0.00086	3.066
EAD6	EAD6	6.20E-40	39.21
EAD6	EAD7	2.10E-11	10.68
EAD6	EAD1	3.10E-08	7.509
EAD6	PDB_CARD	2.00E-05	4.699
EAD7	EAD7	1.40E-27	26.85
EAD7	EAD6	9.40E-08	7.027
EAD7	EAD1	4.30E-07	6.367
EAD7	bDLD1	0.00023	3.638
EAD7	PDB_Pyrin	0.00094	3.027
EAD7	DED	0.0011	2.959
EAD8	EAD8	3.70E-31	30.43
EAD8	EAD5	3.90E-07	6.409
EAD8	EAD2	9.20E-07	6.036
EAD8	bDLD1	3.80E-06	5.42
EAD8	EAD1	1.30E-05	4.886
EAD9	EAD9	1.20E-22	21.92
bDLD1	bDLD1	4.30E-49	48.37
bDLD1	EAD8	8.70E-06	5.06
bDLD1	EAD7	0.00012	3.921
bDLD1	PDB_CARD	0.00065	3.187
bDLD1	EAD5	0.00068	3.167
bDLD2	bDLD2	8.00E-36	35.1
bDLD2	EAD1	2.00E-05	4.699
bDLD2	PDB_Death	0.00032	3.495
bDLD2	PDB_DED	0.00082	3.086
bDLD3	bDLD3	2.80E-42	41.55
bDLD3	DED	4.60E-05	4.337
bDLD3	EAD7	0.00036	3.444
bDLD3	PDB_Death	4.10E-11	10.39
