# Supplementary material for: Bacterial death and TRADD-N domains help define novel apoptosis and immunity mechanisms shared by prokaryotes and metazoans
Source: eLife. 2021 Jun 1;10:e70394. doi: 10.7554/eLife.70394 (PMC8195603; doi:10.7554/eLife.70394)
Supplement: Supplementary file 2. [file elife-70394-supp2.csv]

Domain	p-value
bDLD3-containing systems	3.179E-14
NPCBM domain containing systems	2.702E-36
FGS domain containing systems	3.728E-05
iSTAND2-containing systems	0.0026
TERNS3-containing systems	4.106E-17
bacterial TRADD-N containing systems	8.22E-44
