# Supplementary material for: Bacterial death and TRADD-N domains help define novel apoptosis and immunity mechanisms shared by prokaryotes and metazoans
Source: eLife. 2021 Jun 1;10:e70394. doi: 10.7554/eLife.70394 (PMC8195603; doi:10.7554/eLife.70394)
Supplement: Supplementary file 4. [file elife-70394-supp4.xlsx]

## Sheet: TRADD-N classical
1	WWWWWWWWWWWWWWWWWWWWWWWWWWWWW-FWWWWWW	W	0.183122
2	VVMIVVVTVVTIVSLVSVAVIIITTTTSSVSSTTVVI	V	2.28182
3	GGGGGGGGGGGGGGGGGGGGGGGGGGGGGGGGGGGGG	G	0
4	SSSSSCSCSSCSSGCCSSCSSSSCCCCCCCCCSCSSS	S	1.14355
5	AAAAAAAAAAVAAAAALAVVAAAAAAGVAAAAAAAVV	A	0.982664
6	YYYYYYYVYYFYYYFYFHVFYYYVVVVVVFVVVVFYY	Y	1.59897
7	LLLLLLLLLLLLLLLLLLLLLLLIMLLLLLLLLLLLL	L	0.357429
8	FFFFFFFFFFFFFFFFFFFFFFFFFFFFFFFFFFFYF	F	0.179256
9	VVVVVVLLVLLVLVVLLVLILLLLLLLLLLLLLLIIM	V	1.40091
10	EQQEQQEQAEEEEEKQCQQHQQQQQRQRQKGQQRKKS	E	2.33805
11	SSSSSVSSSSSSSSSASASSSSSSSSSCSSCCSSSSS	S	0.876076
12	STTSTTSLSLTSLTATCTL-TT-LL-LCLTSRLL---	S	2.09023
13	LSSVSSLCVMSMLMCLSSS-CS-CFCCGCSSNCS---	L	2.44455
14	DEEDEEDPDDPEDEPERIPDKEKPPPPPPTPPPPDDD	D	2.16831
15	KNNKKKKSKKKKKKKGEASETKKAGADEGQTGNNDTS	K	2.7683
16	VIVVVVVVMMVVVVVDEDLTIIIVVVVPVVHCVVVVT	V	2.17952
17	VLLVLFVNAVSIIINSDFDDVIVDDNDDNDNDNNDPS	V	2.83404
18	LLLLLLLLLLLLLLLLLLLLLLLLLLLLLLLLLLLLL	L	0
19	SPPSPPSLSAPPSSPPTPLSPPPLLLLLLPLLLLSPR	S	1.95749
20	DSKDMTESDEANEDATASSASSSSHSSSSSSTSSSGA	D	2.54442
21	ALLALLALAAVLALLLLCIMLLLLLLLFLHLFLLLKQ	A	2.08466
22	YYYYYYYYYYYYYYYYFYYYYYYYYYYYYYYYYYFYY	Y	0.303375
23	AGGSGRAKATKQTQKSRRKQEEGKKKKKKKKKKKQTD	A	2.69951
24	HNNQNSDDHDDDNDDHDNDESSSDDDNDDDDDDDNHT	H	2.06453
25	PPPPPPPPPPPPPPPPPPPPSSSRQQQQNLKKHHE--	P	2.1809
26	QEQQQQKHQQQQQQQHEDNQQHQEQQNQKQQHQQK--	Q	1.76879
27	QQRKQQKGKKKQKKNHKLGLKQQGGGGEATGGGGTQS	Q	2.78382
28	KKKKKKKKKKKKKKKRRKKRKKKKKKKKKRKKKKQKK	K	0.668913
29	VPPVPPVFVVFPVLYFFPFLPSPFFFFFFPFFFFLAS	V	2.25277
30	AQNASCASEAGAAASKAHSKSSKIISISIKSSMTKLL	A	3.07894
31	VVVVVVLVVILIVVLIVVLIVVVVIVVVVMLLVVVII	V	1.44721
32	YFFYFYYFYYFFYFFYFYFYFFFFFFFFFFFFFFYYY	Y	0.935269
33	RKKSRKKKSKKRKRKQKKKKKKQKKKKKKGKKKKKEK	R	1.41535
34	AAAAAAAVAAVVAAVAAAVAAAAVVVVTVAVVVVAAA	A	1.11728
35	LFLLFLLILLILLLILVLLLLLLIILIIIIIIILLLL	L	1.34115
36	RKKRKKQKRQKKKKKKKRKKKKKKKKKKKKKKKKKRR	R	0.928609
37	TLLTMLTLGTLLTMLTLLLLLLLLLLLLLDLLLLISN	T	1.76219
38	AAAAAAATAATAAATATATTAAATTTTTTMTTTTAAA	A	1.14355
39	LFLLLFLLLLLLLLLLLFLLLLLLLLLLLLLLLLLIL	L	0.581889
40	AAAEAASTASSAAASTSASAAAATRTTSSAITIVASS	A	2.10867
41	EDDEDDEDEEDGEEDDDEDDDDDDDDDDDDDDDDDE-	E	0.982682
42	SSSSSSSSSSTCSCTSASVASSSSSSSVSVSASSATS	S	1.54442
43	GTTCTTAVCAATVSAVAIIATTTAAAAAAVFVAATRR	G	2.52183
44	GGGGGGDGGDGGEGGGGG-GGGGGGGGGGGGGRRGGN	G	0.969738
45	SSSTSGSGSSGSNSG-GGGSSGSGGGGGGDGGGGSCS	S	1.60432
46	PLFPLFPLPPLQPQLFLLYSVLMLLLLLLSLLLLGRI	P	2.52504
47	DNHDHNDVDNQDNDQNESEANHNGGEGDEPEDSRGDN	D	3.02313
48	VGGQGGVGQEGGVGGRGGGGGGGGGGGGGGGGGGGSS	V	1.33484
49	LVVLVLLYLLYVLAYVYVYFVVVYYYYYYYYYYYCIL	L	2.06001
50	QDDQDDEEQQEQQQEDEDEEDDDEEEEEEEEEEEEEE	Q	1.41433
51	LMMMVIIIIIIIIIIIIIMIMMVIIIIIIIIIIIIII	L	1.09822
52	LLLLLLLLLLLLLLLLLLLLLLLLLLLLLLLLLLLLL	L	0
53	KKKKKKKKKKKKKKKKKKKKKKKKKKKKKKKKKKKKK	K	0
54	IVVIVVILIILIIILILVLIVVVVVLVLFILLVVVIV	I	1.69183
55	HHYHYHHHHHHHHHHQHHHYHHHHHHHHHLHHHHYHL	H	0.960623
56	RCCRCSCDRCDCCCDCDCDGCCCEDDDDDSDDDDESQ	R	2.1576
57	SSSSSSSASSASSSASASASSSSAAAAAASAAAASSG	S	1.13264
58	DDDDEDDDDDDNDGDDQDDGHEDDEDEDDDDDDDTDD	D	1.4694
59	PPPPPPPPPPPPPLPNPPP-PPPPPPPPPPPPPP-QP	P	0.557854
60	QHQQHHQRQQYQQQLDSDA-HHHFFLFFFQFFFL-QH	Q	2.60185
61	LLLLLLLLLLLLLLLLLLLFLLLLLLLLLLLLLLFLL	L	0.303375
62	IIIIIIVGIIGIIIGIGIGGIIIGGGGGGVGGGGGII	I	1.24876
63	VVVVVIVVVVVVVVIVIIVLVIVVVVVVVVVVVVMLL	V	1.12917
64	QQQHQQQEQQEHQQEQQQEEQQQEEEEEEQEEEEQYH	Q	1.46846
65	LLLLLLLVLLIMLLLLILLLLLLVVVVLIVLLVVLLL	L	1.29455
66	RKKRKKRKRRKKRKKKKKKKKKKKKKKKKKKKKKKKK	R	0.639457
67	FFFFFFFFFFFFFFFFFFFFFFFFFFFFFFFFFFFFF	F	0
68	CCSCSHCVGCVCCCMCMHTTCCCDVVVMLNMMMVTCN	C	2.78026
69	GNVGKKGDGGDGGGSKDKAEKMNDDDNDDEATDDKGG	G	2.75801
70	RQKREQRARRCLRQKKEQIEQREAVVMIVVMLVVELK	R	3.12471
71	QGEQEEPTQQDEPEVEGESKEEEAAAASSEPLAADED	Q	2.97178
72	PNNPNNLVLLVPPLTNVNSKNNNAAAAPTKPSAARPN	P	2.85444
73	CCCCCCCCCCCCCCCCCCCCCCCCCCCCCCCCCCCCC	C	0
74	GRRDRRGRDGRTGGRRRRRRRRRLQRKRQRQKQQLQL	G	2.21127
75	RRRRRKRRRRRRRRQKKKRNRKKQQRQRQQRRQQKRE	R	1.69351
76	FFFFFFFFFFFFFFFFFFFFFFFFFFFFFFFFFFFFF	F	0
77	LLLLLLLLLLLLLLLLLLLLLLLLLLLLLLLLLLLLL	L	0
78	RRQRQQKERRERRREQQQEHQRQEEQDDEREDNSHKR	R	2.52464
79	ASSASSASAASSLSSSSSSNSSSSSSSSSISSSSSDD	A	1.37184
80	YYYYYYYYYYYYYYYYYYYYYYYYYYYYYYYYYYYYY	Y	0
81	RRRHRHRSRRARRRAKAQARRRRSSGSSSKAASGKKR	R	2.35095
82	EEEEEQESEEAEEETNSQCNEAESSSSCSSCCSSNEE	E	2.27493
83	GGGGGGGGGGGGGGAGGGGDGGGGGGGGGGGGGGKCR	G	0.885129
84	AAVATEAAEAAAAAANLELKALAAAAASTTSSAAAKR	A	2.30518
85	LLLLLLLVLLVLLLVFVFLLLFLVVVLLMLLLLLLVV	L	1.33585
86	RRRCQQRRCRSRRRSHQQRQQRQRRQHLRQALHHQQH	R	2.26442
87	ADDTDETQATQAADQRQEQQEEKEQQQQQQQQQQQMH	A	2.45671
88	ASAASAASAAFAAAAAFVAASSSSSSSFSLFFSSAQH	A	2.01165
89	LLLLLLLLLLFLLLFLFLLLLLLLLLFLLLLLLLLIV	L	0.842424
90	QQQQQQQAQQTQQRTQGQHAQQQCSSSSSQSSSSQQQ	Q	1.99411
91	GRRRKRRQSKQERNQLQGQYNKNQQQQQQEQQQQSNE	G	2.62505
92	CHHSHHCHRYHSLSHIHRHHHHHHHHHHHRHHHHHKQ	C	1.92435
93	LLLLLLISLMALLLTILLAFLLLAATAAGLAAAAFLL	L	2.12086
94	ASQAKKACAALVAVLNSRSGQQQGCCGSCRSSCCEKR	A	3.24205
95	ALVANVSRMARLALRSRCR-VVLRRRRRRARRRR-NR	A	2.39758
96	ASSATSALAAVGADICT-LNSTTLLLLLLALLLLKCC	A	2.85254
97	LLLLLLLLLLLHLQLFLVLQLLLLLLFLLLLLLLLFL	L	1.04833
98	AAAASAATALSAAASPSPVCASSAAHASTLTEAASSS	A	2.34529
99	LTLLMLQSLKGQQQVMGLRIMMMLVIVILLLLLLIVL	L	2.75236
100	HTSNAPEPNPSHRHSPLDPPTTPTPPAPPSLAPPPED	H	2.86316
101	TRSSSSAESFDLSLDSESDSTATEDEEGEEGGEEMGS	T	2.87152
102	VVIVVLLLLVFVMGFLPVLIVVIIFLCVILVVLLTLL	V	2.44179
103	PRPRSPREKQTPPQRLTLDTPPSTAASSSEVPTRTPQ	P	3.10099
104	LVLLVLLALLVLLLVLFIICLVVVVLVVVVMMVVFIV	L	2.08881
105	QQQLEKQEQQDHQHEKEKQREQEEEEEEQQEEEESFF	Q	2.36048
106	LMTLTTLTLLTLLLTTTMMTMVTTTTTATTTATTTTL	L	1.67518
107	EEEEEEEEEEQEEEQEQEQVEEDQQQQMQEQRQQEEE	E	1.55383
108	LLLLLLLLLLLLLLLLLLLLLLLLLLLLLLLLLLLLL	L	0
109	RKKRKRRRRRKRRHKRKKKKKKKKKKKKKKKQKKKKK	R	1.17389
110	ATAAAAAAAAAVAVAAAAAAAATAAAAAAAAAAAAIV	A	0.876076
111	GGGGGGGGGGGGGGGGGGAGGGGSGGSGSSGGSSGDD	G	1.09822
112	TAAAAAATAATSTS-ASATTNSSTPTTTTS-TTTTTN	T	1.85131

## Sheet: Bacterial TRADD-N 
1	HKGKATTERLTRQVETREELQQQDNPILNEKETTQTKKTTKTKTNIEKNEKKE	H	3.2577
2	KKPQKASVIGITRVAETKVIIVAKKQINSAVTIITIIIIITISGGKTEEDKKP	K	3.27473
3	QKKREQNDHLWRRRKKKWRIVRQVVPKGRRQKKKKKKKKKKKEKQEDQQKSSK	Q	2.98075
4	TVQVIAVFLKGILWLIWVAYWWIFLLYTPRFAAAAAAAAAAAAFVLILLLYYI	T	3.18166
5	ERLQQQQVERQSEKIWIEKEEETEEAMQIREICVVSVVSSVVVVVVEVVVAAS	E	3.12441
6	LILLILLLILIIIIEWLWWFLLILLFVIIIIIIIIMIIIIIIIIIFFIIFFFF	L	1.95138
7	VTTIIIITDKVVCKVRERRVVVVVVVKTQKVVVDTVTTVVTVVKIVITTAAAM	V	2.74137
8	ILLIILIIIIIIIFEILLLLSWLIMIFLILLLLLLLLLLLLLLIILILFIIII	I	1.70736
9	QDKPEEDQDENKNTTTSSTSPSPEESKAKEKEKEEEQEEEEEEPPSTTTAAAS	Q	2.89901
10	GLLDGGGGGLGASGNITIIGLAGVVGGGIFGGGGGGGGGGGGGGGGGGGGGGG	G	1.83891
11	VEDDNIEDDDTTFDDETDDRSTDDGKDSPDDDDDDDDDDDDDDDNSSDDSTTT	V	2.3525
12	DLTFITLLFALLILLLFLIVFIMIIILLVVIIIIIIIIIIIIILIVIVIIVVG	D	2.28056
13	LETYN-VEEDDPDAS-EPPSTDRDDSDDDEAIKN------NNNNNHKEEDSSD	L	3.27583
14	SKK----TTWDDESY-TEHEEDDDDP--NKSSS-------SSSKSENSTKPPK	S	2.96224
15	SFDSQDEYLFQFLLFEIIIVVAFLLSTELLIVVSNDDDDNIIVQNIRNKAEEK	S	3.56949
16	FLFLVFFTDSYDNTQNDTHSSRTTTTIVSDDDDISSSSSLNNNNNNHNNDDDI	F	3.15945
17	ALKADEEAAVEAFPKPEPNKPKPPPARKPADNKNPSVVVVNNNTPPKPPEIIK	A	3.19044
18	EQDQLTEGNSDHYENDQELQQEPEETQPDAQNDNPQQQQQHDDEEVRDAAAAT	E	3.30022
19	KCKSYAKQTEKANKINRQQR-REKKEHENRVFFDNNSNNNLLLEQRKVFKKKT	K	3.57
20	QDEKIRKKLLVIFILLLLLLVVQIILQLLLQRKLLLWWLPALSQQLVQQLLLL	Q	2.8276
21	AERTKKDKGSVADQPQKEEEEESDDQEDQEKTLKAKKKKKVVVKNRKAAKKKK	A	3.11082
22	QKVKKNDAKATHLQE-AKAAAASKKAKKNATTFAIVFIHFLASTNIAAAAAAA	Q	3.08789
23	LLLILLLLLIVVVIILIIIIIILIIFIIIILMITLIIIIILLILWIILFIIIL	L	1.74966
24	IKVIKVVMVMERIQMQFQLVLLQNIVRLIVEEEFAKQQQEEKELLEELLVIAE	I	3.1782
25	AYADYSGDSEKESTAAENDEKTQNSEQETQTATELSSSSWSLLEETKVSGAAK	A	3.36614
26	FTITKIVAEEYQLVKILLLHRHILFLAMLHILFFTMAVITICLAAHLLMLLLH	F	3.35653
27	ILALLLLIILLLFVLVVLLLLLLILLILILFLLILLLILLLLLVVLLMMLILL	I	1.63145
28	SAAAAAALYANRKRENMQRRQRAQQRMRQQRKRAKRRRRQRRRKKRQQQQQKQ	S	2.60279
29	DGVIIAATQKLMKENRQEREQERKEKEKQKSIEQTDEEDLQERKRKEKAQKEK	D	3.26379
30	LFIILVLILKILVIVLLIIIVLFITKIELLLYSQYYYHYYNYYLSILAVIVLF	L	2.99986
31	AL-LLLLLS----T-GSPMTSAAAATSSSLLGSFS-SSSSSSSASSGSSSSAS	A	2.23511
32	DDSPDDEGG-HSSGGLGGGGGLRRRGRGED-G-P-P-------GGGCKGGQQA	D	2.90169
33	PVPPIKKRG-LGEDQEDNNDDDPDDDDDDDGAGGGGGGGGGGGDDDDDDDDDD	P	2.51947
34	SKKQSEE-RIDDDDGKPAAVYDENNNSQTGS-DDHDDDYDDHHEKKPATTSTV	S	3.58412
35	QKDAQASTPGTVNQMPSSSHSAQTTSRTTSSTTPTTTTSSTTTNNQTSSSSSE	Q	2.92646
36	LIVIIVIIVINSSQILLMLLLLIIIINILIIIIIIIIIIIIIIAPLLLLIIIL	L	1.99694
37	KSLDRRKTRKFLLTIITTRTKTTKKDKTETTRIKKTEQNNTKKKTKVTKETKT	K	2.85098
38	IITIFIIVIAREQMVVLFVLLLIPPIIIFLIIVVIIIIIIIIIIIVIIIIIII	I	2.23315
39	AEVLLSLKLSLIVMKQRDEILVVIIAVRIRTEKTISTTIIITTDSTDDEVVIV	A	3.3149
40	RDSRGQRHCRKVDKYKKKKKKKRMMFGITRDDDADDDDDDRDDKKNDRKNDDD	R	3.03912
41	MVVVYVVMVIIEYIVIVIIIIIIKKFTISIIIIIIIIIIITIIIILVIIKIIV	M	2.12073
42	TEKYFITGTRVVITKDDEESKEELLEKKKEQQKKQKKKKKEKKEEEDEEEEED	T	2.90984
43	AEQASSSKKAEQDEKQQKESAKAKKEEEKEAAEEEKEEPPKKKRKEEKKKRPE	A	2.51271
44	GGGGGGGGGGGGSGGGGGGGGGGGGGGGGGGGGGGDGGGGGGGGGGGGGGGGG	G	0.269549
45	SSSSSSSSSSSSSSSSSSSSSSSSSSCSSCSSSSSRSSSSSSSSSSSSSSSSS	S	0.365792
46	VVITIVIIIIVVYIITVIIITVVIIIVVIMIIIIIVIIIIIIIIIILIIIIIL	V	1.49521
47	HKFIRKVKRVKRNIILLRVKIIHRRKIIIERRKKKGKRRRKKKKKKKKKRKKK	H	2.44713
48	VVLFFVLMLLLLLILLLLLLLLVLLVIILLIIILILLLLLLLLII-FIILLLF	V	1.63807
49	FTTDIIETHSTTIEGAFVVVVVTFFIEIFIKTFFTIFFIRIFFTT-VTTIIIV	F	2.84469
50	MVVLIVLLLFLVVFLFFFFLLLLLLLFIFFLLIIVVVVILIIIFFLLFFLLLL	M	1.97806
51	NEAGEEEGSDESNAEEENDEQQQEENEDEDQIEEEEEEEEEQENNKKSSQEEQ	N	2.45891
52	MILLLLMLFCGLGGSSSGGGGGMGGGGGSGGGGGGDGGGGGGGVVGGGGGGGG	M	1.89323
53	PPPPPPDKEPSSSSSDDYTSSAPSSLSSSSSASSSDSSSSSSSSSSSSSSSST	P	1.90783
54	AEAPEARRPPQSDEDRSLQEEPEEEPLNQQPQEPPQPPPPQQQPPLPPKEQQP	A	2.72746
55	EDDEDDISDEEEQAESEGEKKESDEEEEAKEQKEEEEEEEEKESDSEEEAEEE	E	2.13345
56	ALGASKAEAVDAEGSEGGGGGGIGGGGGGGDDDSDDDDDDDDDGGCGGGGGGG	A	2.34558
57	AVAVACAAACFALFYYFFFFFFALLLFLLLFIIIIIIIIIIIIIILLLLLLLL	A	2.42366
58	YDGQQHNERDNAIEQDDEEQEERQKAKKDEAEHQEEEEEEREQKKEEKKSEEE	Y	2.88149
59	QYRRKERRARLHKQRRRRQFRRWRHQRRRKRRKWKGQLRRRQKRKKRRRRRRR	Q	2.32951
60	LLLLLLLLLILLLIIIIVILIILLLLLLLLLLLLLLLLLLLLLLLLILLLLLI	L	0.827984
61	KILRLVIKMQDLELREERQKSEVAAQEEQDIITELVVVRVIKIEEQEEEKEEE	K	3.15336
62	TKHSSLKESREKKDDETEELSTTDDESSRADVFTSSSSASSHSEKEREEENNR	T	3.14323
63	MNSLLLLALMFQLLCLLLLLLLLLLMKRLLRREQNQRRRQRLLLDLLQQLLLL	M	2.39732
64	AKDLYFFIRFFRFFYYFFFLLFHHHVIFFLLIIIFIIIIIIIVI-FFIIYFFF	A	2.58454
65	LSVQLTNEERKDTNQRTERESKEQQEKKQKTAQEQKKKEEQDEK-VNKKERRN	L	3.09049
66	NKADSEQKSNDGSRRSQTTSTARSSSSASSSSLSASSSSSSSSSPESSSSSSS	N	2.43138
67	SFQNGRNGGGGGGGGGKGGGGGRGGGGGGGGRGGGGGGGGGGGGDGGGGGGGG	S	1.19803
68	DSSSTSDERENEDEERQAEEQEVEEEEEEQEENQEEEEEEEEEKKRENEEQQE	D	2.31932
69	FLQLILLLLLFLLLLLLLLLLLLLLILLLLLFILILLLIVLLILILLLLLLLL	F	1.1229
70	KLTHEEKANSSEETSDTSTISAMQQETKATITTTQKKKKTRTTELLTTTTEEK	K	3.08878
71	SLLLGPSQREKSEEEEDEEQEEEAAQEQADEEETEKETEEETEDLEEEEEDDE	S	2.59423
72	IKPIVMIVIVTLFILLLQLISLLLLLIIRIILLILLVVLLLILNIVIVVVVVI	I	2.488
73	VKIEKETTSLLILALLLLLLVLLLLGLALHNNNGESTTSSNSSLILFLLLLLF	V	2.9142
74	SEKKEQSGGGDGKGGKGGGGGGDNNVGGGGGGNGGGGGGGGGSKSGDGGGGGD	S	1.93868
75	LNSVVIVAFVIVYLVVIVVIIIILLFFFVIFLFFFFFFFFFFFERIVMMTIVV	L	2.72915
76	RLVLTKKVRRTAKATSPTPSLLRKKPPTPSPNFPPAPPPPPPPEAPPPPPSSP	R	2.83985
77	IVALFFIIVIIVKVVVIVVVVVDSSVIVVVVVIVVVVVVVIVIQKLIVVVVII	I	2.01118
78	AVLEEMIISKESLEASKLLQREVDDTLEEKEREKEQEKQQEKENGKEEEEEEE	A	3.07783
79	GIGKSGSDNDSSNSDDSEDEDDRDDAEDFDNNNGDDDDDDDDSKEDSNDDNNS	G	2.54609
80	DDEEYTPIVVLMIVLLVVVIVVLIIVVVVVIIIIIIVVIIIIIIEVVVVVVVV	D	2.1754
81	IIHSQVLDVRTQFEQGREQRRRQPPTQREQQQQQQQQQQEQKQYLFEQQHEEE	I	3.08739
82	FESDGKPTNIIDLPVQVLLQYRVEEAQPSGIIIVVIIIIIIITLDFFLLFFFF	F	3.56169
83	YESENPVTLEDVKAKIEEEYAAIIIVIEIVLLLLLLLLLLLKLVLLILLLIVI	Y	2.89284
84	ILTPTESGGPIGLGPTPPSTGASIIDDWSDSNNSSNSSSRKVKQSRGPPSTAE	I	3.51471

## Sheet: DEDD2
1	-----YYYYYYYYYYYYYYYYFYYYYFYYLYYYYFVYYYYYYYYYYYYYYYYYYYYYYFYYYYYYFVYGLL	-	0.94834393
2	-----CCCCCCCCCCCCCCCCCCCSCCSCTSCCSSACSCSCECSSSLCLVCCCCCLCLTCLCCCCCPQFGG	-	1.97638573
3	-----QQQQDQQQQQQQQQQQENHDHQQEAQENDDLEECENTDEEEEEEREEEEEEEEEEEEEEEEPQRNN	-	2.36960864
4	-H--HHHHHHHHHHHHHHHHHHYHHHHHHESHYQQQHHHHYHHHHHHHHHHHHHHHHHHHHHHHHHSIISS	-	1.12445462
5	-H-HHEEEEQNDEDDEDEEEQHEEVEDSDREEQNHEDEDEDDEEEEDEEDEGGGGDGEEGEEEGEEPHDRR	-	2.43382751
6	HHHHHTTTTTSSSSSSSTSTTTNNTNTNSSEPSTSSASSSQSTSSSSSSDSPPPPSPSSAARRPRAPRTEE	H	2.68426178
7	HHHHHAAAAAAAAAAAAAAAAIAVAVAAVKSVVVVTAAAAIAAAAAAAADAAAAAAAAAAAAAAAVHLGTI	H	1.82115080
8	-HHHHLLLLLLLLLLLLLLLLLLLLLLLLHLLLLLLLLLLLLLLLLLLLLLLLLLLLLLLLLLLLLCLILL	-	0.58387908
9	-HHHHQQQQQQHQQQRQQTQERRETEQDRVERQRRERRVRE-RRRRRRRHREEEERERRARRRERRVSMQQ	-	2.46366003
10	-HHHHGGGGGGGGGGGGGGSGEGGGGGGQGSQGGGGSGGGDVGGAAERGNRQQQQNQDRQNRRQRRLNRTN	-	2.65937083
11	-H-HHNNNNNNNNNNNNNNNNNANNNNNNNSNNNNNSGQGSNGGRRGGSHSGGGGGGGGGGGGGGSGQTFF	-	2.21062361
12	-H-H-VVVVIVVVIVVVVVVVVVVVVIIVVVVVVVVVVLVVVVVVVVVVIVVVVVVVVVVVVVVDVVLVVI	-	0.91122011
13	-H---FFFFNFFFFFFFHFFFASFNFFFMFHLSVAFSSHSNTSSASSASHAAAAASASMVSAAAPVAHRAA	-	2.69946489
14	-----SSSSSSSSSSSSSSSSSSSSSSSSSSSSSSSSSSSSSSSSSSSSSSSSSSSSSSSSSSSSSSSSSS	-	0.00000000
15	-----NNNNNNNNNNNNNNNNNNNNNNDNNDTIVVNDDNDNNSDDDDSDNSRRRRDRDTRDSSRSSSHEDD	-	2.29990484
16	-----KKKKRKKKKKKKKKKKKKKKKKKKKKKKKKKKKEKKKKKKKKRKKRRRRRKRKRRKRRRRRRRRRR	-	0.99027365
17	-----QQQQAQQQQQAQPPQPQAPAPPPQQEQPQAPRQRQAPPQQQRPRQPPPPPRPQPPRPPPPPPNPHH	-	2.02252385
18	-----DDDDEEDEEEEEEEDGDDETESDNEENDDETQHDHDTGQQQQRQHRQQQQQQQRQQRRQRRRDEDD	-	2.64874057
19	-H--HPPPPLVPAVAAALAPRPPLLLELRAAVPPPVPPPPPELPPPPGPRGAAAAPAPGSPGGAGGGPLPP	-	2.53977804
20	HHHHHLLLLILLVVLLLILLLMILLLLLLVLLVLLVLLLLILALLLLPLKPLLLLLLLPVLPPLPPPAFFF	H	2.12814240
21	HHHHHEEEEEEEEEEEEEEEEEEEEEEEEEEEEDDEEEMEEEEEEEEAEEGAAAAEAEGAEGGAGPGQDSS	H	1.95130636
22	HHHHHRRRRRRRRRRRRRRRRRRRRRRRRRRKRRRRRRRRKRRRRRRRRKRRRRRRRRRRRRRRRRRRQRR	H	0.71982178
23	HHHHHQQQQQQQQQQQQQQQQRQQQQQQQQQRQCCQQQHQQQQQQQQQQQQQQQQQQQQQQAAQAQQQQQQ	H	1.02259838
24	HHHHHFFFFFFFFFFFFFFFFFLFFFFFFFFFLFFCFFLFLLFFFFFLFFLLLLLFLFLLFLLLLLLFLMM	H	1.46910433
25	HHHHHEEEEEEEEEEEEEEEEDEEEEEEDEEDEDDEEEEEDEDEEEEDEEDDDDDEDEDDEDDDDDDDDDD	H	1.26667392
26	HHHHHRRRRRRRRRRRRKRRRVCKKKRKVRRVCLLKLLLLCRLLLLLVLLVVVVVLVLVLLVVVVVVLRVI	H	2.36904057
27	HHHHHFFFFFFFFFFFFFFFFFFFFFFFFFFFFFFFFFFFFFFFFFFFFFFFFFFFFFFFFFFFFFFFFYY	H	0.54961134
28	HHHHHNNNNHNNNNNGNSNSANSAMASAGNTSTGGMGSSSNTSSSNSSSSGGGGGSGSGGRGGGGGGFILL	H	2.75445821
29	HHHHHQQQQQQQQQQQQQQQQQQQQQQQQQQQQQQQRRQRQQQRRRQQQQQQQQQQQQQQQQQQQQQQHQQ	H	0.82445853
30	HHHHHAAAAAAAAAAAAAAAASAAAAAASAASAAAAAAAASAAAAAAAAAAAAAAAAAAAAAAAAAAAAAA	H	0.67411597
31	HHHHHNNNNNNNNNNNNNNNNCNNTNNNNNNTSNNNSSSSNDDSNSNNSSSTTTTNTNSMDSSTSSSSSVV	H	2.15132199
32	HHHHHTTTTTTTTTTTTTTTTTTTNTTTTTTTATTTTSASATALLLSGSTGAAAASASGASGGAGGGNTNN	H	2.31122929
33	HHHHHIIIIIIIIIIIIIIIIVIIIIIIIIIIIIIVVVIVLILLLLLVLIVVVVVLVLVVLVVVVVVTLLL	H	1.83772010
34	HHEHHLLLLLLLLLLLLLLLLLLLLLLLLLLLLLLLLLLLLLILLLLLLLLLLLLLLLLLLLLLLLLLLLL	H	0.52363574
35	HHEHHKKKKKKKKKKKKKKKKKRKKKKKKKKKRKKKRRKRHKRRRRRKHRKRRRRRRRKKRKKRKKKNRRR	H	1.46765101
36	H-EH-SSSSSSSSSSSSSSSSSSSSSSSSSSSASSSSSSSSSSAAASSSTSSSSSASAASASSSSSASSNN	H	1.13325996
37	-----RRRRRRRRRRRRRRRRRRRRRRRRRRRRRRHRRRRRRRRRRRRRRRRRRRRRRRRRRRRRRRHRRR	-	0.19590927
38	-----DDDDDDDDDDDDDDDDDDDDDDDDDDDDDDDDDDDDDDDDDDDDDDDDDDDDDDDDDDDDDDDSGI	-	0.33880874
39	-----LLLLLLLLLLLLLLLLLLLLLLLLLLLLLLLLLLLLILLLLLLLLLLLLLLLLLLLLLLLLLLPGG	-	0.42075516
40	-----GGGGGGGGGGGGGGGGGGGGGGGGGGGGGGGGGGGGGGGGGGGGGGGGGGGGGGGGGGGGGGGGSS	-	0.19590927
41	-EEEESSSSSSSSSSSSSSSSSDSSSASSSSSYSSSSSSSCSASSSSSSSSSSSSSSSSSASSSSSSDDEE	-	1.12597694
42	EEEEEIIIIIIIIIIIIIIIIIIIIIIIIIIIIIIIIIIIVIIIIIIIIIIVVVVIVVIVVIIVIIIIFYF	E	1.21441324
43	EEEEEIIIIIIIIIIIIIIIIIVIVIIVIIIIVIIVLIVIVVVVVVVLVVLVVVVVVALVVLLVLLLLICC	E	1.95609261
44	EEEEECCCCCCCCCCCCCCCCCCCCCCCCCCCCCCCCCCCCCCCCCCCCCCCCCCCCCCCCCCCCCCCCCC	E	0.36749849
45	EEEEEDDDDDDDDDDDDDDDDGNDDDDDDDDDDDDDDDDDDDDDDDDDDDDDDDDDDDDDDDDDDDDDHTT	E	0.86263982
46	EEEEEIIIIIIIIIIIIIIIIIIIIIIIIIIIIIIIIIIIIIIIIIIIIIIIIIIIIIIIIIIIIIIILFF	E	0.65427845
47	-HE-EKKKKKKKKKKKKKKKKKRKKKKKKKKKKKKKKKKKKSKKKKKKRKKKKKKKKKKKKKKKKKKRRRR	-	0.82467352
48	-H---FFFFFFFFFFFFFFFFFFFFFFFFFFFFFFFFFFFFFFFFFFFFFFFFFFFFFFFFFFFFFFFFFF	-	0.11190991
49	-----SSSSSSSSSSSSSSSSSSSTSSCSSSSSSSSSSSSSSSSSSTSTSSSSSSTSTSSTSSSSSSSNNN	-	0.80990112
50	-H---EEEEEEEEEEEEEEEEEEEEEEEEEEEEEEDEEEEDEDEEEEEEEEEEEEEEEEEDEEEEEEDQRR	-	0.79187220
51	HHH-HLLLLLLLLLLLLLLVLLILLLLLLLLLILLLLLLLLLLLLLLLLILLLLLLLLLLLLLLLLLLLLL	H	0.67335361
52	HHH-HTTTTTTTTTTTTTTTTSTTTTTTSTTSTSSTAGTGSTSAQQDSETSSSSSDSDSSDSSSSSSHSDD	H	2.15724317
53	HHHHHYYYYYYYYYYYYYYYYYYYYYYYYYYYYYYYYNYNYYYNNNNYNYYYYYYNYNYYNYYYYYYYHHH	H	1.06807015
54	HHHHHLLLLLLLLLLLLLLLLLLLLLLLLLLLLLLLLLLLLLLLLLLLLLLLLLLLLLLLLLLLLLLLLLL	H	0.36749849
55	HHHHHDDDDDDDDDDDDDDDDDDDDDDDDDDDDDDDDDDDDDDDDDEDEDDDDDDEDEDDEEEDEEDEEEE	H	1.03291415
56	HHHHHAAAAAAAAAAAAAAAASAAAAAAAAAAAAAAAAAASAAAAAAAAAAAAAAAAAAAAAAAAAAAAAA	H	0.54961134
57	HHHHHFFFFFFFFFFFFFFFFFFFFFFFFFFFFFFFFFFFFFFFFFFFFFFFFFFFFFFFFFFFFFFFFFF	H	0.36749849
58	HHHHHWWWWWWWWWWWWWWWWWWWWWWWWWWWWWWWWWWWWWWWWWWWWWWWWWWWWWWWWWWWWWWWWWW	H	0.36749849
59	HHHHHRRRRRRRRRRRRRRRRCRRRRRRSRRNRNNRAARAKRKAAASGSRGGGGGGGSGGVGGGGGGRRSS	H	2.38968848
60	HH--HDDDDDDDDDDDDDDYDDDDDDDDDDDDDDDDDDDDDDDDDDDDDDDDDDDDDDDDDDDDDDDDDDD	H	0.36636800
61	HH--HYYYYYYYYYYYYYYYYYYYYYYYYYYYYYYYYYYYYYYYYYYYYYYYYYYYYYYYYYYYYYYYYYY	H	0.25801867
62	HH-HHIIIIIIIIIIIIIIIILLILIIIMIVMLIIILLILLILLLLLLLALLLLLLLLLLLLLLLLLVQTT	H	1.89769112
63	HH-HHNNNNNNNNNNNNNNNNNNNNNNNNNNNNNNNSSNSNDSSSSSNSNNSSSSSSSNSSSSSSSSSSSS	H	1.33848713
64	HH-HHGGGGGGGGGGGGGGGGGGGGGGGGGGGGGGGGGGGGGGGGGGGGGGGGGGGGGGGGGGGGGGGGGG	H	0.31599713
65	HH-HHSSSSASSSSSSSSSSSSASSSSSSSSSSSSSAASASSAAAAASAASAAAADANSAAAAAAAAETAA	H	1.61632776
66	HHHHHLLLLLLLLLLLLLLLLLLLLLLLLLLLLLLLLLLLLLLLLLLLLLLLLLLLLLLLLLLLLLLLLLL	H	0.36749849
67	HHHHHLLLLLLLLLLLLLLLLLLLLLLLLLLLLLLLLLLLALLLLLLLLLLLLLLLLLLLLLLLLGLAKRK	H	0.93815450
68	HHHHHEEEEEEEEEEEEEEEEEDEEEEEEEEEEEEEEEAENEEEEEEEEEEQQQQEQEEQEEEQEAEHRKK	H	1.52362104
69	-HHHHAAAAAAAAAAAAAAAAAAAAAAAAAAAAAAAAAAAGAAAAAAAAAAAAAAAAAAAAAAAAAAAVFL	-	0.74128057
70	HHHHHLLLLLLLLLLLLLLLLLLLLLLLLLLLLLLLLLLLLLLLLLLLLLLLLLLLLLLLLLLLLLLILLL	H	0.47279573
71	HHHHHKKKKKKKKKKKKKKKKRKKKKKKKKKKKKKKKKKKKKKKKKKKKKKRRRRKRKKRKKKRKEKKKMI	H	1.16968480
72	HHHHHGGGGGGGGGGGGGGGGGGGGGGGGGGGGGGGGGDGGGGGGGGGGSGGGGGGGGGGGGGAGGGSDAA	H	0.97452926
73	HHHHHVVVVVVVVVVVVVVVVVVVVVVVVVVVVVVVVVVVVVVVVVVVVVVVVVVVVVVVVVVXVVVVMHN	H	0.63399807
74	HHEHHFFFFFFFFFFFFFFFFFFFFFFFFFFFFFFFFFFFFFFFFFFFFFFFFFFFFFFFFFFVFFFFLLL	H	0.77066179
75	HHH-HIIIILIIIIIIILIIIIIIIIIIIIIIIIILIIIIIIIIIIILIILLLLLILILLILLLLLLVTLL	H	1.34851797
76	HHH-HTTTTTTTTTTTTTTTTTTTTTTTTTTTTTTTTTTTTTTTTTTTTSTTTTTTTTTTTTTTTTTRAAA	H	0.77885637
77	HHH-HDDDDEDDDDDDDEDDDDDEDEDDEDDDEDDEDDDDDDDDDDDEDEEEEEEDEDEEDEEEEEEHPSS	H	1.50382227
78	HHH-HSSSSSSSSSSSSSSSSSSSSSSSSSSSSSSSSSSSSTSSSSSGSAGAAAASASGASGGAGGGYADD	H	1.70552995
79	H-H-HLLLLLLLLLLLLLLILLLLLLLLLLLLLLLLLLLLLLLLLLLLLLLLLLLLLLLLLLLLLLLLSKK	H	0.66048013
80	H-H-HKKKKKKKKKKKKKKKKKKKKKKKKKKKKKKKKKRKRKRKKKRRRKRRRRRRRRRRRRRRRRRMRTT	H	1.42845672
81	--H-HQQQQQQQQQQQQQQQQQQQEQQQEQQEQQQQRRARQQRRRRMRMEREEEEMEMREERRERRRDSSS	-	2.21121998
82	-----AAAAAAAAAAAAAAAAAAAAAAAAAAAAAAAAAAAVVAAAAAAAEAAAAAAAAAAAAAAAAARFLF	-	0.72506170
83	-----VVVVVVVVVVVVVVVVVVVVVVVVVVVVVVVVAVAVVVAAAAVAIVVVVVAVAVVAVVVVVVFVVV	-	0.83252736

## Sheet: DEDD2 others
1	RRREKEKKQQVNKKKKKNRTETNKAATAEAAKREVTKARNKEPMEPTLEQPATTEQAVTLALANTLETSTLLMTSVEPTQQSACALAADATTTTNTSYMSYYTYQYVYYYFFYSYSTKYAESTVQLLST	R	3.64976
2	EEEKEKERVVDEEDEEEAEEKRAEEEREKLEDEKAEEKEEEEESRPRNGKPEPNGVEKRNVNQEVEVLQLNNNRQKVTEVVEKYQEVKIVPTPPKTNSKACCVCICACCCCCCPCNPLVERPLRKQVAP	E	3.47912
3	EKKKKKDVKKTNRRKEEQKEKSTEVVKVKRVRKKNKEHKRKEKEREKLEKEVQREKKHNLHLTQEEHQQQLFFSKHQKKLENSAETQKNQAYAAIYEDKSQQYQTQLQQEEQEADRAQRRSALAMINSA	E	3.53087
4	VFFVIVVYTSFVAVVIILFVVLILAALAAAAVFVQIIHFLIVVVVLLVVTLAVLVTFHAAIAVINVININAIIAVHNVVTTLAEVLSATSSISSLIAHMAHHLHIHQHHHHHHAHLAMHVFALEMAQAA	V	3.23304
5	CFFLFLLVYYLYFLLFFFFLLLVFQQQQLLNLFLILFIFLLLLRMLQALLYQTLLYLYFAYALLYLYYLYAAAFLAYLLYYLDELFYNLYFSFFDSMVEFQDLEANEEEEHDDFQLFEDEIYLYLQLHF	C	3.16526
6	LLYCLCCKVLSQSCCLLELVCEQIVVEISSKCYCTGLTLGCRCEWSEFRCHTTDRLLRRSLHAVLRLLNLSLHRNALAHAQEKKNKLKLLEIEEKIETTETSESGSSTTPTTSETKEKDEKEKQHKTEE	L	3.75637
7	LLLLSLLLEEIMLSLSSMLLRIMSIINLLLISLSKLSKLMRLLQSIKKLLQIFMLERKLKEKQYKLKKLKKKKLLKKAEEKEYYQQECLEQFQQIFQAVQAANAAATAAVIAVQAQQHDMIQQQYAKQQ	L	3.46243
8	LAVIIIIFVVIIIIIIILAIIIIIFFIFIILIVIFIIVALILIFIMIYIIIFMVIVIVMYYYIIFIYFIFYYYMIVFIIFFIFLIMFFLFFMFFFMFLIFLLILILLLLLLLLFLIFILFCFIIYLNFF	L	2.44896
9	TGGAVAATHHKKVAAVVKGAARKVRRKRIAEAGANAIHGQAAARASKLAACRKKAHAHHLHLAANAKNANLFFHAHHAAQQRTAAKNTKNKKKKTKGTTREQRTLQEQQRRQRRQRRIHDEKKHTTKRK	T	3.45459
10	RKKMEMADDDDRVMLRRRKKMKHRGGKDIMRMKMKELNNAMSTSRSNQVIGGTAADQSEEDQSKDADDEDTKQEARDDLDDTEEKDDRSDKNKKDNKGTKGGPGMGGGSQEGQKGAKENKQKPRNDGKK	R	3.61106
11	NNRNNNNEHHSENNNNNTNNNLGNRKMKNNKNHNVNNVNLNNNNNLMTNNTRRDNHDMMTHTKNHNHHKHTATKRVHRRHHMELSVHELHENEETNENAENNENRNNNNNNNNENREKHALEELVENEE	N	2.98041
12	LYYYYYYVSSFVYYYYYVYYYVLYIILVYYLYYYLYYLYLYYYMYIVVYYIINIYSYVVISIYYSYSSYSIIVVYLSYYSSIMYYLSMTSLKLLAKVVVLVIIVIVVVVVVIVIITLIIFMLILVVMLL	L	2.69971
13	LLLLLLLKT-KLLLLLLKLLLERLLLKLLLFLLL-LF-LFLML-LNRDLLNLYGLKYFTDRDLLRLRRLRDDDRL-GLLSV-LELAGLNGSLSSLLLNFEFFKFYFFHFLAF-QNKHNHTSEKS-LKQS	L	3.09508
14	QEQHQHQ-D-NQEQNQQQEQD-QQDD--EQDRQQ-QN-E-DQQ-QE-PQNDDSDQDHSQPDPEEDQDDRDPPTQE-DKKDD--QQTD-VDQSQQ-SE-QSSS-S-SSS-SSS-Q-NQNSDQGTN-QIQQ	Q	2.86343
15	NTTTTTNRKK-GTTTTTGTTTAGTLRE-TT-TTVLTAFTNTTAEIQESATR-K-AKSRGSESATDPENRNSTTFAFSLVRKRSHITNQTNTSTTTS--E-NN-NGNN--TNN-T-TTPNEFTELKNK-T	N	3.2758
16	TTMTTTTNLDTKTTITTKTTTNKT-KNDTT-TMKSTISTETTKGNGNKTTR-HETMVLRKLKASHTRHTHKKKGFPHKAEQGTSVDDDKDNMNNNMT-ETKKTKNKK-SKKKMN-DNDKVTNDHNTDTN	T	3.31868
17	PPKPPPPTKKNTPPPPPTPPPETP--E-PP-PKPSPKGPYPPPKPEKLQPE-KKPKKESPCPPPAPCADAPPP-SEA-PRKKQSECELKE----A-KS-NPQMPN-P--Q--SISL-NQYLKLSA-AN-	P	3.12623
18	LPPPPPPDEGPHPPPPPHPPPPHP--PPPPKPPPQPPKPTPPFDPNPEPPIPVSLGPRHEQEPPQPQQMQEEE-PIRPPGGTEKSEKAHQDEEERESN-TG-EEP-TNNN--NKNKEEHQELVHQREDE	L	3.23806
19	QQQEQERLVVQMQQQQQIQRREMRE-GKQQKQQKRQQGRMQSRTKSRDSQVDLARVSDLEADSQARAASAEEE-NKTTDVVLMESPAQGAIGIIDGKK-VR-DAE-VKKV--KERKITRNDENRDKEII	Q	3.63629
20	SSSSSSSFGRSLCSSSSMSCSVMSNNMNSSCSSSLSSLSMSCCTSSILSNSNGVGRDLVLILCTLCIMDMLRLHRLMNSGGPFSTLMFKMIMVVLMIATI--L-RQVPQLQPQSAVIRKPSATNHRIIL	S	3.61285
21	SKKRTRKDAAITSRKSSDKKRTTSRRTKASRIKSESIKKNSKEHSMTNRRIKVTKARRGNKNKEKKKKKKNNSSERKRRAAEKKKSKKAKKGKKKGNTQK-EL-LEEEDEDSNMEMKLERETTDIKSRR	S	3.2873
22	EEKDEDARLLELDEDEELEADSLEQQSEDEYEKESEESEGEASGESSGDDPERPQLK-LGSGDNSASSDSGGAHKSSEKMLKKQKSSRYSDEEEKEELKD-VD-LVRLPKPERELKDKKLREEPNRSDE	E	3.33601
23	EEEEEEDLNAELEDEEEVEDELFEASLFEETEEEMEEKELEDDLELLFDEIEALDTGSLLFFDELEFLKLFYFLERFGETTVAMELFAMFTFSSAFALISLVTLNLQILRMLLIIASLQFAVAAAIKSS	E	3.38552
24	LRYCHGRSKKCTRRHHHVRHRKTHYYKYRRLHYLYHFYRRHRCYLEEVFRNLLKQKFFSVTVLHTQTTLTVILAHYTFFEEVARCLTALTALMMTLLEVMEEAELECEEFEEEREIMYFIVTVQLLLLM	L	3.74543
25	NDDNNIDRFFNNNKNSSNDDSDKNHHDYKTHNDSENNRDNNDDYSEDYDNEHIEEFDPDYDYDTNDDDNDCEQSNGESGASQEKNTNDDNEKEECKDRKERRERQRERRDRRRNRQEGEEKNRRTSEEE	N	3.3924
26	MEEEMEA-IIWVKEEKKVEEEIARKKIKDEKKEDKRRKELKEDHELIYSELKEVDIDKVYHYDALEYHGHYFYIGKHEDMILKEELHYVHVYIIVYIQLIQQAQPQKQQVRQQTQIIVLVLAQQTDKIV	M	3.68221
27	FFFFFFF-TTFFFFFFFFFFFCFFMMLMFFMFFFMFFMFFFFFLFRLMFFEMFLFTFMFLLLFFLFLLFLLLLYFLLFFMILFLFLLFFLMIMMFILFVMFFIFFFFFF-FFFLFLMDFSMILFLLLMM	F	2.06775
28	MMIQKQV-EKKRMQHKKKMAQRVKAARAKKVMLKVKMVMRMLLQMRKELEQSLNLKLRTQIEMLILIFVFETRSVVTLLQKDCQMKIIYIHEHHVERENNEEKEVEMEE-DEDKEEHKSAEKSDLLNNN	M	3.73059
29	EDDEEEASHNEEEEEEEEDAEEEEKKEDEEREDEETEEDTETASETEKAEFSEEATKKAEEKTTDHDIRIKNEPEKNQTNTRKKEESKASTDTTDDGKKTRRQRERQKR-VRVERRTA-ARMNLEEDTT	E	3.21921
30	CFYYYYYFYYFCYYYYYCFYYCFYCCCCYYCYYYCYYCFVYYYLYCCVYYCIKFYYYCCVVVFYTYAIYIVVVCYCVYXYYCKYYAVRFVLSLLNSVFMLFFIFFFAFFFFFFLFLLV-FCLIFFFYLL	C	2.7774
31	KQQLKLKD--K-ERLKK-QKQ--KKK-AKREEQRETEKQ-KKR-R---KK-KG-K-MK----GR-K--V-----NN-VE----PM---S-K-LL--KM-CANIN-N-SSSNSGCH-C--R-C-F--KCE	K	3.53814
32	EEKDEDEI--E-KEKAA-DEK--EQR-REERKKEKEKLD-KEE-K--REM-RY-E-RL-RYRNEYEYYRYRRR-ALYRR----QG---L-HYCCYYHQ-RQQKQ-Q-QQQQQQRQKR-QE-KKQKKKKH	E	3.144
33	MLLMMMMFRGMDMMMMMDLMMDDMFFDFMMFMLMFMMFLEMMMGMDDNMKDFDNMGGFDNKKMMRMKNKNKKKNMYCKMG-DGGKEYGDYGNKKGNDAGHAAGAAA-AASSASHAGHQANHHGADTIHG	M	3.45157
34	QRGKRKRGLLKSQRKRRSRRKAARKKAQKKNKGRSKRCRARRRLRVAVRVGALLQLVSAVVVRRVRLAVATVVAKCVVRLEAAAVAWAGWDLHHALRTAGNNVNANNNNTCNNGNIGVSYAGVSIKCGR	Q	3.52982
35	LVAVFVLALLAELVVLLEVLVAELAAEALVAVAVAVLAVQVVLNVTKLLRNASEVLLALLLLFKNLRSISLLLLVAHIILLEAVLVVHQVELGGSLDNKETTNTETTTTTTTTDTRDNTAMKSNYLIES	L	3.40648
36	ILIHIHLTFIVLIILIILLYLTVIAATAIIALIIILITLLVVIVIPTITIVAQAIIIILILIIVLLLLFLILVILTLITFLILFALHLVHITDDVTIIIVIIVILIVIIIVIILIVLIIIFLVTVVKLM	I	2.64963
37	IIMIIIILKKIMMLIIIQIIIIAILLTLMILIMILLILIAIIIKIVTVILILVMIKQLDVVVIIVIVVVVVVLDLLVVLKHETVVILIELSRLLIRVLIILLILILLLLLLLLVLTEILLYTILKGLTH	I	2.8184
38	KKTTTTTKYDTKKTTTTEKTTGHTRRFIKTRRTTTTTKKDTTTAAKGDADYRAGKDDKRDTDTYSTSTETDDDRTKTGTSEDKHDSGKQGDADDIADKRGKKIKDKKKKKKKKDKKAARKDDGNRPNND	K	3.11386
39	GCRCGCGKVIDVGSGGGACGGVAGKKVKSGKGDGKGGKGIGGGAGVVAGVFKLVGIVKVTVTGGVGLVAVTSSVRKVLGSSALTVFTLVTILIIALMSAISSVSVSSSSSSSSLSAIGTDIIVSLIGLI	G	3.23079
40	FAVVTVFIDAVNFVVVVTAVVEQVAAGAFVAFVVIVVIAVVVVEVRGQVSRADTVAKIQHAQIHGVAQKQQQQQTIDDVRFEIAIEVNKVSGSSAGFRENRRKRVRHRRRRRRSRQSHRTKSKHRRISS	F	3.50398
41	HRRSSSTEVASLRSSSSMRRSKMAEEDEYYESRSESSERPSKYDSKDPHVKKVVGASELSASAEETVGTGSPTLWEVFGKKEEKKIGESGYCYYRCSDKRDDPDRDDDDDDDDEDEEEDSHDTDLTETN	H	3.68942
42	GGGGGGGGGGGGGGGGGGGGGGGGGGGGGGGGGGGGGGGGGGGGQGGGGNGGGGGGGGGGGGGGGGGGGGGGGGGGGGGGSGGGGGGGGGGGGGGGGGGGGGGGGGGGGGGGGGGGGGGGQGQGGGGGG	G	0.289714
43	SSSSSSSCSSSSSSSCCSSSSCSSCCCCSSCSSSCSSCSSSSSSCCCSSSCCSCSSSCCSSSSSSSSSSSSSSCSCSSSSSCCSSSSCSSSCSSCCSSCSSSSSSSSSSSSASSSSSSSCCSSDSSSSS	S	0.907365
44	LLLLLLLVLLLVLLLLLVLLLVVLVVVVLLVLLLVLLVLVLLLLLVVLLLVVLVLLLVVLVLLLVVVILILLLVLVVLLVLVVILVIVIIVLIVLLVIVVIILIIIIIIIIIIVILVVILFVLIIIIII	L	1.57447
45	VVVVVVLLVIVEVVVLLKVLVKKVFFRFVMLVVMLLVLVKVLLKVERILVEHIQLIVLKIIILVTIIIIIIIIKILIIVIVKEIMKFETFKEIIREVVIKIIIIVIVIIIIIICIIQIVEICVLVLVRR	V	2.79819
46	IIIIIIICIIIFIIIIIFIIIVLICCVCIICIIICIICILIIIIILVIIILCILIIICFIIIIIIIIIIIILLFVCIIIIILCTILICFIFIFFLIFCSFCCFCFCCCCCCCCFCFFLCCIFFCVLFFF	I	2.01252
47	TTTTTTKYVVTITTTTTITTTTVTHHVHTTHTTTTTTTTITTTTTTTTTTTYSTTVTTVTITTTITIITITTTVTTITSIILTTKNSVVSTRSCTRRDYKDDYDVDDDDDGDDTDYWTDHRTYDITHTS	T	2.62832
48	VVVVVVVLLLVLVVVVVLVVVFLVLLWLVVLVVVLVVLVVVMVVVLWVVVLLLVVFVLLVLVVVVLLVVVVVVLALLVVFFLLIVVLLVLIVIILVVILLIILILIIIIIIIILILLTILLLLILVLIL	V	1.88049
49	KQKKKKKENNRHKRKKKRKKKRHKDDRDKKDKKKERREQHKKKEKRRKKKRENRKSKEREDERWEEDKEKELLRHEEEKDNGLRGREMREHQRRRQRKEKKKQKKKKKKKKKKRKQRRKEVRKRVRSLL	K	2.75114
50	CCCCCCCFCCCVCCFCCVCCCFVCFFFFCCFCCCFCCFCVCCCCCVFCFCVFCVCCCFFCCCCCCCCCCCCCCFCFCCCCCFFLCVCFICCCCCFCCFFFFFCFVFFFFFFFFCFCCCFFCCCFCFVCC	C	1.36286
51	EKENENDEQQEKEDDEERKNDNKESPTPEDAEEEDDEDKADDNREARPHEGAKQNQAENRPRDVPTPPRPRTTNTDLRVQQRDSQYPDLPKRKKTRPTDQSSTSSSSSSSSSSTSTHWSDPKRSKYYKN	E	3.59925
52	SSSSSSSNRRSSSSSSSSSSSSSSDDSDSSDSSSDSSDSSSSSTSSSSSSSDTSSRSDTSTSSSSSTLSLSSSTSGTSTSSSATSSTASTSNSSTNTEDSEEDESEDEEEEEESEDSSECSSDDSSDSS	S	2.02544
53	LLLLQLLSIKLQLLLLLRLLLKQLVVLALLILLLTLLILRLLLLIQLLLLQDLRLILIRLLQLLLLLLLLLLLKLSLLLLIVPKVKLARLLMVLRMVLEMLLLLILLLVLLLLLLMQLILVLKLLLPLV	L	2.20713
54	QQQKLKPSEEMEQQKMMGQQKEKIGGEGQQCQQQPEMPQEKEEKQKEEQKKDKELEQPEEEEPKEEEEKEEEEEERDKQDKEEEQKDEVDREAASEFTNETTSTSTTTTSSTSTTSTKTAHASHRENLD	Q	3.40398
55	IIISISICSIIGIISIIGIISGGICCGCIICIIIHSIDIGSIIVIGGIISGSGDISVHGISIIISISSISMIIGIDSIIGSGKAIGSKGSSSCCASAYGDYYGYSYYYYYYYYSYGDCYNSAGYADAAG	I	2.8389
56	LLLLLLLYILLLLLLLLLLLLLLLYYLYLLYLLLLLLLLLLLLLLLLLLLLYLLLLLLLLLLLLLLLLLLLLLLLLLLLLLLLALLLLLLVLLVLLLLLLLLLLVLLLLLLLLCLLAFLFLCLLLLLCA	L	0.918556
57	EEEEEEEDEEEEDEEEEDEEEQHEDDKDEEDEEEKEEKEDEEEQDEREEEEDDEEEEVQDDDEEEEDEEEDDDQDVEDDDDKQVSEEQEETEQHEENDENDDGDKDDDDDDDDQDGQQDEDEGELTMHK	E	2.31217
58	EEDEGERTHHEKEEEKKKERERKETTKTEKTEDESRDSEKEIRCEKRESEKIQRSHESKERGREHRRRDREAAKKTHERHHKNKDKHSKHSREEMRDAKDAADARAAAAASAAEADAHAKQEQAHYNSD	E	3.28753
59	LLLLLLLFLLLLLLLLLLLLLFLLFFFFLLFLLLFLLFLLLLLLLLFLLLLFLFLLLFLLLLLLLLLLLLLLLFLFLLLMLFFLLLLFLLLLIIMLLFFIFFLFLFFFFFFFFLFLLFFYLLLFLFLLL	L	1.17085
60	WWWWWWWLWWWWWWWWWWWWWWWWWWWWWWWWWWLWWLWWWWWWWRWWWWLWWWWWWLWWWWWWWWWWWWWWWWWLWWWWWWWWYWWWWWWWWWWWWWWWWWWWWWWWWWWWWWWWWKWWWWWWLWWWW	W	0.498554
61	TRKEIEESNHTNKKKTTAREEANTRRKHKARTKTRETRRAEEEEADKNEEARKQEHARDYNEEVREYTYTSDYEDRRKDSNETDIHSTTSERRKDRDRDRRRFRQRRRRNCRSDRFGTREQEYRDSEEE	T	3.38603
62	NEDDDGDADDDMDDDDDMEDNKMDSGMGDDGDDDGEDGEMDDDEEIMDDDMGDADDDAMDDDDDDEDGDGDDDMSGDDHDDIEMDLDEMDMDMMDDSDFLDDMDSDDDYDDDDRDKMADRSAMDMKIEK	N	2.55444
63	YYYYYYYYFYYYYYYYYYYYYYYYYYFYYYYYYYYNYYYYYYYYYCYYYYCYYYYYYYYYYYYYYSYYYYYYYYYYYYYYYYYYFYYYYYYCYYYCYYHYYYYYYYYYYYYYYYYYYVYYYFYYYYNYY	Y	0.704826
64	SLSSLSSKLLLTSISSSTLSSSTSSSSCSSSSSSRSSRLQSSLTSNLCLSNSLISLTRSCICSKLSIRCRCCCSSRLRLLLSKTLCLKVLRCLTLCQLEQIIKIKIIIIMLIMIIKVKATRIKVNKIKS	S	3.04464
65	SSSCSCSDSSSTSSCSSTSSCSSSDDTDSCDSSCDCSDSSCSSSCSTTSCSDSSSCCDSNSASTNRSNTNTTTSTDATSSSSSETSTSTTCHSSSHSNSSNNSNDNNNNNNNNSNNSSNECSCSKDSSH	S	2.39998
66	GGGGGGGGGGGGGGGGGGGGGGGGGGGGGGGGGGGGGGGGSGGGGGGGGGGGGGGGGGGGGGGGGGGGGGGGGGGGGGGGGGGGGGGGGGGGGGGGGGGGGGGGGGGGGGGGGGGGGGGGGGGGGGGGG	G	0.0654908
67	HHHLHLHRHHREHHLHHEHHLEEHSSKSHRSHHHLHHKHELHHCHEDRHLDSHEHHHKEVHYHHYHHNCNFHHELKDYYHRESEHEHDEHDNSSDNDSGESSESSSSSSSSSSCAEKIAKERKEETKLH	H	3.11158
68	LLLLLLLLLLLLLLLLLLLLLLLLLLLLLLLLLLLLLLLLLLFLLLLLLLLLLFLLLLLLLLLLLMLLLLLLLLLLLLLLLFLFLVLLLLLLLLLLLLLLLLLLLLLLLLLLLLLLLFLVLMLLLVLLL	L	0.508531
69	GGGGGGGSDDGAGGGGGAGGNQAGSSKSGGSGDGSDDSGENGGNGKKNGDKSNHSDNSANNDGGNNDDSDNNNANSDAGDDQSQNKHSAHLDQQSDALSLLLSLKLLLLLLLLLLDLGLSQLNARTILL	G	3.08898
70	EEEKEKDEKKENEEKEEKEEKQKEDDQDESDKEEEKEEEKKEETTHREEKQDKTEKEEEEKEDEKEKKEKEDDQEEKKKKEEEKARMKMMERSSNRTEKTEENEEEEEEEEEEGENRREAAHDHEAKSD	E	2.61975
71	VVVMVMVTVVVRVVVVVRVVVRTVTTRTVMTVVVTVVTVRVVVTVICMVMLTVRVVVTRMVMVVVVVVMVMMMKMTVMVMMCFSLRLFKLLMLLMMTALSAAMAKAAAAAAAAIALLLATAALAATDTK	V	2.85527
72	QQQVVVVLAAQLIQQQQLQVQLFQLLLLQVLQQQLQQLQLQVAAQMLAVVLLAIVAVLMVAVVVAAAAAAAAAMALAAQAALLLALTLLTLAIFLALLTILLLLLLLLLLLLLFLLFLLLVFLICLLFF	Q	2.50592
73	NNNRQRQTEENTQNDNNTNQDKTNTTQTNQTNNNTDNTITDQQENGQQQRGTEKQEQTTQEQQQEQEEQEQQQTQTDQDEEGTQQEETTEQEQQTENKDQKKHKKKKKKKRKKQKHQTKSEQVKQSAQQ	N	2.95458
74	CCCDNDRRRRCENCCCCECRCAECRREQCSRCCCQCCQCECRRSCAKKRDRRRSRRKQRKGKMKRKRRKRIKKEKQRQCQQRQHEVRNERRRRKDRRGLSGGSGKGGGGGGGGKGSRSSADSDSKDQEQ	C	3.23845
75	---CSCCEYY-IC----I-C-DI-EEDE-CE---E--E-I-CCY-EDFCCEEYTCYCEAFYFCCYLYYYYFYYVYEYY-FFEEVHDYEIYGCTTDCHVARVVSVSVVVVVVVVHVSAVVCSCSVVIIGG	-	3.32219
76	FFFFFFFLLLFLLFFFFLFFFLLFLLLLFFLFFFLFFLFLFFLFFFLLFFFLLLFLLLLLLLFFLLLLLLLLLFLLLLFLLLYLLLLYFFLLFFILFFLLFFLFLFFFFFFFFLFLFLFLFFLFFLLFL	F	1.15727
77	VVVVVEVIVVVIVVVVVIIVVPIVIIPIVVIAVVIVVIVIVVVLVPPVVVPIVPVVVIVVVVVVIIVVVVVVVIVIVVVLVSIVVPVIIVIVVVVVIIPIIIIINILLIIIIIVLVVVIVVIIVCLAIV	V	1.76557
78	TTTTTTTTTTTTTTTTTTTTTITTTTITTTTTTTTTTTMTTTTTTIITTTVTTITTTTTTTTTTTTTTTTTTTTRTTTTTTTTDTIPTTPTTTTTTTTDTTTRTETTTTTTTTNTSTTSTSSRRTLQTN	T	1.31855
79	EEEEEEEDDDEDEEEEENEEEGDEDDEDEEGEEEEEEEEDVEEDENEAEENDDSENEEDEDEERNDDNENEKKDEESDESEGADEQNQDDKNTTINDDDPDDEDMDEEDDDDEPEEPEESIPKHEDEKK	E	2.54283
80	KTKKKKEDEEKEKKKKKETEKKEKDDKDKKDKKKDKEETEKEEDKNTEEKSDEEGEDEEEKE-EEDKEEEEDDEEEEYDEEDETRGEEEETETDPETSERSSESESSSSSSSSFSESEADKSEYKTKSS	K	2.55818
81	IIIIIIIMIMILIILIILIIVVLIMMVMIIMIIIMVIMILIIIMILVIIILMMVIMILLVLL-LMLMMIMVIXLIMMIIMMILFVVVLLVLLLLMLLLMVLLTLELLLILLLLLLTLMLLTLILIIQLL	I	2.13271
82	LLLLLLLMKKLTLLLLLTLLLETLRRTRLLRLLLKMLKLMLLLKMRKLLLRRMRLKLKVLKL-LRIKRLRLLLVLQKLLKKEEKLYKETKLILLKIRKRLKKLKLKKKKKKKKLKLQQKVLLLMLLQLL	L	2.35877
83	KKKKKKTAKRKTKKKKKTKTKMTKAAIAKKTKKKQKKQKQKKTRKMVMTKVATITKTQPKKK-EKRKKMKRKKPEEEKQEEIEKTIEETERKEEEKSEHQQQQQKQQQQEQQEKQQKTEAEKQDREERK	K	2.80719
84	EEEEKEEARREEEEEEEEEEESEEAASAEEAEEEEEEEESEKERKVSAAEVAKSERDEGERE-DEERETEEKEGEKKKEKRSMHKDKMEKKKRKMKKALYAAQAEAAAAAAAATAQRREKNEQREIFAS	E	2.88862
85	LLLLLLFELLLDLLLLLDLLLADLEEEELLELMLELLGLELLLYQEELLLEELELLLGDVLI-LLFLLFLLFFDFELFLLLEEQFELEDLCLCFALYVEFVVLVLVVVVVVVVCVLCAIMLCLFMSLCC	L	2.70351

## Sheet: NCOA6
1	LLLLLLLNLLLLLLLLLLLLLLLLLLLLLDLLLLLLNRLLSLNDLLLLYLPYLDVDDDDDNDDDDDDDDDDDDDPDDDDDDDDDDDDDDDDDDDDDDYGDFLDDDDDPYYYGLLLHTTTDHHDDDDDDDDDEDDDDDDEWVGALLTTTNDDDDDDDDNDDSTSSSTSSSHTSSSGSLDDLDDDDGPHCTTYNNTTTTTRYYVVCDDDQFSSEEDDEGEDHLALCATDYVIL	L	2.92165
2	AIAIAIIIIIIIIIIIILIAIVIAIAIIISIIAIVTIIIISASSVIAIIIAIISISSSSSISSSSSSSSSSSSSTSSSSSSSSSSSSSSSSSSSSSSILSVISSSSSTITISLLVILLLSFSFFFFFFFFFFFFFFFFFCIVLDDLLLLFFFFFFFFSFFCCCCCCCCCPCCCCACTFFLCSSFSASELLVSSSSSSSKIIVVAFFSTLLLTTSSSSSSSIVVTTTTIVVI	A	2.79842
3	TEIQTEQPEEEEQEEEEEETEEETETEEETEETEETPVETFTTTEETTEEKEETKTTTTTTTTTTTTTTTTTTTTTTTTTTTTTTTTTTTTTTTTTTETTEETTTTTKEEEAEENQKKKTTTTTTTTTTTTTTTTTTTTGEETKKKKKTTTTNNNNNNNTGGGGGGGGGHGGGGRGENTQTTTTAEVQTKETTTTTTTLEEEETTTTIETTTTTTTTTTLEETTTTTEEEE	T	2.1722
4	TTTTTTTATTTTTTTTTTTTTTTTTTTTTITTTTTTATTTITIITTTTTTLTAITIIIIITIIIIIIIIIIIIILIIIIIIIIIIIIIIIIIIIIIITIITTIIIIILTTTVAATAAAAVIVVVVVVVVVVVVVVVVVVVKLALLAAAAIIIIIIIIIIIVVVVVVVVVTVVVVVVVIVTIIIVVTLVAAAIIIIIIIVTTAAIVVVVTAAMMIVVIVIIATTIIIITAAT	T	2.10384
5	VVVVVVVVVVVVVVVVVVVVVVVVVVVVVFVIVVVVVVVIVVFFVVVIVVVVVFVFFFFFVFFFFFFFFFFFFFVFFFFFFFFFFFFFFFFFFFFFFVFFVVFFFFFVVIVFVVVVVVVLFFFFFFFFFFFFFFFFFFFVIAVVVVVVVFFFFFFFFFFFVVVVVVVVVLVVVVVVIFWVFFFFFVVRVVIFYYYFFFRVVVVFFFFCVVVVVFFFYFFFVVIFFFFVVVV	V	1.52136
6	LVLILIVLIVVVVVVVVIVLVILLVLVVVVVVLVILLVVIILVVLLLIFFLFLVVVVVVVVVVLMVVVVVVVVMLLVVVVVVVVVVVVVVVVVVVVVFIVFIVLVVVLFLVIVVLLVVVIVVIVVVVVVVVVVVVVVVVVRVVVVVVVVVVVVVVVVIVVVVVVVVVVVKMVVVVVIIILVVMVIILLVVFVVVVVVVLFFLLVVVVLLVVLLVIIIIIVVVVVVVVVLIV	L	1.51433
7	TTTTTTTTTTTTTTTTTTTTTTTTTTTTTATTTTTTTTTTTTAATTTTTTTTTATAAAAATAAAAAAAAAAAAATAAAAAAAAAAAAAAAAAAAAAATAATTAAAAATTTTAIVTTIIIAAAAAAAAAAASAAAAAAASTTTTTTIIIIAAASAAAAAAATTTTTTTTTVTTTTTTTAATAAAAATTTIITAAAAAAATTTTTAAAATTIITTAAAAAASTTTAAAATTTT	T	1.41217
8	CCCCCCCVCCCCCCCCCCCCCCCCCCCCCFCCCCCCVCCCCCFFCCCCCCCCCFCFFFFFCFFFFFFFFFFFFFCFFFFFFFFFFFFFFFFFFFFFFCFFCCFFFFFCCCCFCCCCCCCFFFFFFFFFFFFFFFFFFFFCLCCCCCCCCFFFFFFFFFFFCCCCCCCCCNCCCCCCCFFCFFFFFCCCCCCFFFFFFFCCCCCFFFFCCCCCCFFFFFFFCCCFFFFCCCC	C	1.13463
9	EEEEEEEREEEEEEEEKEEEEEEKQEEEEKEEEQEKREEEKEKKEEEEEQTEEKKKKKKKEKKKKKKKKKKKKKTKKKKKKKKKKKKKKKKKKKKKREKKEEKKKKKSEEEQREEQEEERKQQQQQQQQQQQQQRQQQKESAEHHEEEERRRQRRRRKRQEEEEEEEEEKEEEEEEKKKKKKKQQTEEEEKQKKKKKKEEEEEKQQQTKEEEERQLQQKKEIEKKKKEEDE	E	2.06673
10	GGGGGGGGGGGGGGGGGGGGGGGGGGGGGGGGGGGGGGGGGGGGGGGGGGGGGGGGGGGGGGGGGGGGGGGGGGGGGGGGGGGGGGGGGGGGGGGGGGGGGGGGGGGGGGGGGGGGGGGGGGGGGGGGGGGGGGGGGGGGEGGGGGGGGGGGGGGGGGGGGGGGGGGGGGGGGGGGGGGGGGGGGGGGGGGGGGGGGGGGGGGGGGGGGGGGGGGGGGGGGGGGGGGGGGG	G	0.0402221
11	DDDNDDNNDDDDNDDDDNDDDDNDDDDDDNDDDDDDNNNNNDDNDNDNDDNDHNNNNNNNDNNDNNNNNNNNNNNDNNNNNNNNNNNNNNNNNNNNNDNNDNDNNNNNNDDNNNDDNNNNNNNNNNNNNNDNNNNNNDNDTHDHHNNNDNNNNNNNNNNNDDDDDDDDDDDDDDDDKNNDNNNNNDSSDDDNNNNNNNNNNDDNNNNNNNNNNNNSNNNNNDDNNNNDDHD	D	1.22999
12	ILILIILIILLLLLLLLILLLLILLILLLILLLLLLIHLIILIILILIILVIIILIIIIILIIIIIIIIIIIIIVIIIIIIIIIIIIIIIIIIIIIIFMIILIIIIIIFYFMLILILLLMLMMMMMMMMMMMMMMMMMMLHILYYLLLYMMMMMMMMMMMLLLLLLLLLLLLLLLLAMMLMIIMMLILFLYIMIMMMMLFFFFLMMMLFLLIIMMMMMMMLLLLLLLFFIL	I	2.02447
13	HGKEKGEGGGGGDGGGTRKEGKSRTRGGKDKGDTKRGDSDNRKGSSRDNGSNCGDDDDSDNDDGDDDDDDDDGDAGDDDDDDDDDDDDDDDDDDDDGNEDNYGGDDDASDHEKHHDHHHKEEDEQEQEEEDEEEDDEEERRDDNNHHHHDDDEDDDDGDDRRRTRRRRRRRRRHHHDEKADGDEESGSHHDDDNNNNNNYYHHDDETSYHHTTEEDEEDGQKNYNNDHHDK	H	3.06267
14	DDDDDDDDDDDDDDDDDDDDDDDDDDDDDDDDDDDDDDDDDDDDDDDDDDDDDDDDDDDDDDDDDDDDDDDDDDDDDDDDDDDDDDDDDDDDDDDDDDDDDDDDDDDDDDDDDDADDDDDDDDDDDDDDDDDDDDDDDDDDDDDDDDDDDDDDDDDDDDDDDDDDDDDDDDDDDDDDDDDDDDDDDEEDDDDDDDDDDDDDDDDDDDDADDDDDDDDDDDDDDDDDDDDDD	D	0.143409
15	PPPPPPPAPPPPPPPPPPPPPPPPPPPPPKPPPPPPAPPPHPQRPPPPPPKPPRPKKKRKPKKTKKKKKKKKRKEADKKKKKKKKKKKKKKKKKKKTPATPPRRKRKEPPPEPPEPPPPAEEEEDEDEEEEEEEEEEEEPPPPPPPPPPEEEEEEEEEEEPPPPPPPPPPPPPPPPPEDPVRTEEPKAPPPELEEEEETPPPPDEEEPPPPPPKDEEEEEPPPDSSAPPPP	P	2.2126
16	TETETEEDEEEEEEEEEDEAELETDLEEGDCEADLADEEEDGDDHEAENDDNDDDDDDDDTDDDDDDDDDDDDDDDDDDDDDDDDDDDDDDDDDDDDNDDDQDDDDDDDQQDSNDDDDDDDDDDDDDDDDDDDDDDDDDRQGEEEDDDSDDDDDDDDDDDRRRKRRRRRRRRRCRRDDDEDDDDDAGNDDNDDDDDDDNNDEEDNDDNDEENNDDDDDDDNEQDDDDEESS	T	2.11671
17	FFFFFFFLFFFFFFFFFFFFFFLFFFFFFFFFFFFFLFFFLFLFFLFFLFLLLFFFFFFFFFFFFFFFFFFFFFLFFFFFFFFFFFFFFFFFFFFFFLLFLFFFFFFLLILFFFFFFFFFFFFFFFFFFFFFFFFFFFFFFLFLLFFFFLLLFFFFFFFFFFFFFFFFFFFFFFFFIFFFFFLFFFFFFFLFFFFFFFFLLLLFFFFFFFFLLFFFFFFFFFFFFFFLLFF	F	0.661497
18	PPPPPPPPPPPPPPAAPPPSPPPPPHPPPKPPPPPPPRPPTPQEPPPPQPEQPESKKKEKPKKQQKKKKKKKEQEQKKKKKKKKKKKKKKKKKKKKEPQKKPEEKEKKHQPSCVPPQQPTAKTTATAATTSRTNTAITTPTTAHHPPPPQQQQQQQQQQQPPPPPPPPPPPPPPPPQKVPQEKTSPRPPPPQQQRQQQPHHQLQTVASSPPSSQKQQQQQSPNQQQQHFKP	P	2.80734
19	FHFHFDHHEHEHHQHHSHRYRHLYTSNQEWEHYQHLHQQDEGQQLKGDSNESKQEWWWQWKWWQWWWWWWWWQWDKQWWWWWWWWWWWWWWWWWWWQVQWNLQQWQWEANHQSNVTASANEMQQRQRRHQHQQQQQQQQTKVGFFAATQEEEEEEEEEEEAAAAAAAAAEAAAAAEEDNSDQWRQRKIKQQEEEEEEENAANNQQQQNSRRTTEEEAEENEQQHEQERIKE	F	3.5096
20	KKKKKKKRKKKKKKKKKKKRKKKRKKKKKKKKRKKLRKKKKRKKQKRKRKRRKKKKKKKKRKKKKKKKKKKKKKRKKKKKKKKKKKKKKKKKKKKKKRKKRRKKKKKRRRRKQRRRRRRKKKKKKKKKKKKKKKKKKKKRFQVKKRRRKKKKKKKKKNKKRRRRRRRRRRRRRRRRKKKRKKKKKRKKKKQKKKKKKKKRRQRKKKKQRKKKKKKKKKKKRRKKKKKRRNK	K	1.13778
21	LFLFLFFLFFLFFFFFFFFLFFLLFLFFFLFFLFFLLLFFLLLLFLLFLFLLLLFLLLLLLLLLLLLLLLLLLLLLLLLLLLLLLLLLLLLLLLLLLLLLLFLLLLLLLVLLLFLCLLLLLLLLLLLLLLLLLLLLLLLLILFLLLLLLLLLLLLLLLLLLLLLLLLLLLLLLLLLILLLLLLLLFLLFFLLLLLLLLLLLIILLLLLFFFLLLLLLLLLFFFLLLLLLFF	L	0.900723
22	QKQKQQKNQKDKKQKKKKECEKKRQEKQKDKKHQKQNKSKQREDKTQKESAETDNDDDDDEDDDDNNNNNNDDDANGDDDDDDDDDDDDDDDDDDDDKDDENSDDSDLEHEETPNQDDEDNDEDDDDDDNNDDDDDDDDRSQEHHEEENDDDDDDDDHDDRRRRRRRRRRRRRRRRSDDKNDDDERENKREDDDDDDDREEEEDEDDNDRREEDDDDEDDQKEDDDDEEGK	Q	2.72121
23	CTKILVTAVTTTIVVVIVILIKRHEIIILALIYKKKAIRVKSKTKHSVDLKDCTCTTTTTRTAKATTTTTTTTAKHVTTTTTTTTTTTATTTTATTTSKADQLITITKQEFCVGHTCCSTRTTTTTTTTTMTTSATTTSRTHRWWSSSNNNNKNNNNNNNRRRRRGRRRRRRRRRRGKMQSITTSSGRSSLNATTTTTKQQRRTTTSTDHHCCRNSNNGSIYKTITAEKSL	C	3.49713
24	LILILIIIIIIIIIIIIIILIILLILIIIIIILIILIIIIILIIILLIFIIFLIFIIIIIVIIIIIIIIIIIIIIIIIIIIIIIIIIIIIIIIIIIILIIFIIIIIIIFVFVIILILLLIVVVIIIIIIVVVIVIVIVILLITLLLLLLIIIIIIIIFIILLLLLLLLLLLLLLLLLIILIIIIIIMILLLIIIIIIIIFFFFIIVVLLLLLLIIIIIIVLIIIIIIFFLI	L	1.46907
25	IVVVIVISVVVVLVVVVVVVVLIVVVVVVLVVVVLVSVVVKVILLVVVQIKRVLILLLLLLLLLLLLLLLLLLLTLLLLLLLLLLLLLLLLLLLLLLEILRVLLLLLKHRRLVVIFVVVIVLLLLLLLLLLLLLLLLLLLPKLIIIIVVLLLLLLLLLLLLLLLLLLLLLLLLLLLLLVTLLLLLLVILLNLLLLLLLIHHRRLLVLLKVVMMLLLLLLLILVLLLLRRLV	I	1.92517
26	YDSDNDDTDDDDDDEEDDDSDHEGDNDDQKQDCDHCTDDDLLYEAHLDSETKHESEEEEKDEKNKEEEEEEEEKANDEEEEEEEEEEKKEEEEKEAEREKSCEKEEEARRRRCRSDAAENISSNSNSNSSSRSSSSSSSRHSAKKEEEANNNKTTNNENNRRRRRRRRRRRRRRKRQKNSSEESSKSRGGQNNKQHHHTRRHHKNSNECTTHHYNSNNHNLDVNNNNLHRQ	Y	3.41752
27	KRKHKHRWQRSRRHRRRRHKHKHKKKRRGSGRKEKKWRRQHRGNNARQQKAGANQNNNNNSNNTNNNNNNNNNNANNNNNNNNNNNNNNNNNNNNNSKNNTDNNNNNTGKQGGKKKRKSNGGGGGGGGGGGGGGGGGGGDHKSQQNNSRGGGRKKRRSRREEEEEEEEEDEEEEDEKGNKGNNGGEANKRKRGGGGGGKGGKRGGGGRRKKRRGNGNGSGDSDGGGEHGRR	K	2.97709
28	LLLLLLLLLLLLLLLLLLLLLLLLLLLLLVLLLLLLLLLLLLVVLLLLLLLLLVLVVVVVLVVVVVVVVVVVVVLVVVVVVVVVVVVVVVVVVVVVVLVVLLVVVVVLLLLILLLLLLLMIIIIIIIIIIIIIIIIIIILGLLLLLLLLMMMMMMMMMMMLLLLLLLLLLLLLLLLVVMLMVVIILMLLLLMMMMMMMLLLLLMIIILLLLLLMVIVVMILLLMMMMLLLL	L	1.77144
29	KKQKQKKQKKKKKNEEKKNQNRQQNQKNRPRNQNRKQNNNSRPPKKRNKRERKPGPPPPPQPPPPPPPPPPPPPKPPPPPPPPPPPPPPPPPPPPPPTPPKRPPPPPEKEKPKKKATTAPPPPPPPPPPPPPPPPPPPPRGCQSSAAANPPPPPPPPPPPRRRRRRRRRRRRRRRRSPSEPPPPPRCKNKQPPPPPPPKKKKKPPPPKQKKQQPPPPPPPKRNPPPPKKKR	K	2.39468
30	RSNSNSSQSFASSTTTCFTTTLISGNYADSDTTCLRQDHSREEGQHESETGDHGDNNNGNDNNNNNNNNNNNGNDNGNNNNNNNNNNSNNNNNNNNGKCNDKGGNGNDDSDNCCAKTTTCSNNNNNNNNDNSNNNNNNDTLEGNNTTTSSSSSSSSSGSSAAATAAAKAASAAAATSYCNDGSNNSRHSSASDDDDDDIDDDDHDNNNKHHHHEDGGGGDTEKQEPPEEKD	R	3.34049
31	LLLLLLLMLLLLLLLLLLLLLLILLLLLLLLLLLLLMLLLLLLLLVLLLLLLVLLLLLLLLLLLLLLLLLLLLLLLLLLLLLLLLLLLLLLLLLLLLLLLLLLLLLLLLLLMIILVLLLLIMMVMVMMIMIMMMMMMMMLIVILLLLLLMMMMMMMMMMMLLLLLLLLLLLLLLLLTMLIMLLMMIMLIILMMMMMMMILLLLMVIVILIILLMMLLMLMLLLMLMMLLRL	L	1.36652
32	ICICICCACCSCCCCCSCCICCTICISCCLCCICCLACSCSIILFTICLCSLTLCLLLLLLLLVLLLLLLLLLLSVLLLLLLLLLLLLLLLLLLLLLLLLLLLLLLLSLTLLLLILVVVLILLLLLLLLLLLLLLLLLLAILLTTVVVILLLLLLLLLLLAAAAAAAAAAAAAAAASILLLLLLLCLPPPLLLLLLLLLLLLLSLLLLIQQTTLLLLLLILCGLLLLLLIC	I	2.17067
33	SKSKSKKQKKKKKKQQKKKSKKKSKSKKTHTKSRKCQKPEESNHKHSESTKSHHSHHHHHDHHSHHHHHHHHHHESRHHHHHHHHHHHHHHHHHHHHLNHSLHHHHHQLAAACCCDDDDDDDDDDDDDDDDDDDDDDDDDDDEEEEEEEEEEEEEEEEEEEEEEEEEEEEEEEEEEGGGHHHHHHKKKKKKLLLLLLLLLLLLMNNNPPPPQQQQQQQQQRRSSSSSSSTT	S	3.25283
34	NEDDDGEKDEEEDDEEEDEDKGCDGDEEGMGDDGGDKEQDSDMMGSDDTGSTSMSMMMMM-MMMMMMMMMMMMMTMMMMMMMMMMMMMMMMMMMMMMKMMTKMMMMMITADLKKN-EEEILMMMMMMMMMMMMMMMMMMPST---DDEELLLLLLLLLLLPPPPPPPPPPPPPPPPALM-LMMMMGIQRRSLLLLLLLNTTTTELMMDDKKCCLLLLLLLESALLLLTTGG	N	3.11285
35	EKEKEEKGKKKKKKKKKKKEKNDKDEKKNENKEDNGGKKKDEEEGDEKDKKDDEEEEEEE-EEEEEEEEEEEEEDEEEEEEEEEEEEEEEEEEEEEEEEEDGEEEEEKDSPGDGD-DDEGGDGGGGGGGGGGGGGGGGGHDA---EEKKDDDDDDDDDDDHHHHHHHHHHHHHHSSDGD-GEEGGSGSKRGGGGGGGGGDDDEGGDGANKKEEDDDEEGG-DEGGGGDEIK	E	2.51908
36	EGEGEGGEEGGGGRGGGGGEGESEGEGGGSGGEGEKDGGEDECST-EEKEGK-SSSSSSS-SSSSSSSSSSSSSNSSSSSSSSSSSSSSSSSSSSSSKSSKESSSSSEKRQPKRDNNNSSSSHSSSSSSSSSSSSSSSTPDKETTEKQSSSSSSSSSSSSPPPPPPPPPPPPPRPPELA-PSSSSDGRKKQSSTTTTTKKKSKPPSSEESSRRASV-SLPEREPPPSSKGG	E	2.74207
37	KDNDNQDQQDEDDDEEEQDKDECKENDNESEEKEEKQDDKEQGNESKKRVNRSNGSSSNSRSSDSSSSSSSSNSDDTSSSSSSSSSSSSSSSSSSSNERSRENNSSSHRHKEEKKQGGAEEKEDDDDDEEEEEEEEEGEQRSGEEEDTKDDDDEEEEEEEHHHHHHHHHHHHNHHHGDETENNDGEDGKRDEEKKPQQNQRKREEEENKKKAAEEE-QEEERKEEEENHPE	K	3.12705
38	PGPDPKGEDGDGGGSSEIGPGSDPSPVGSKSQPSSPEGGSLPQKGTPSKLSKTKSKKKKKKKKQKKKKKKKKKKAQKKKKKKKKKKKKKKKKKKKKKKKKKKKKKKKSKRQRQSLEKKRRTTRRRRRRAMRRRRRRRRRHAQPTTRDKRRRRRIIRRRRRTTTTTTTTTTTTTTTTTKKDRKKRRRDKLFNKRRRRRRLKKKKRRRKSNKK--RRRSRRRLYGRRRRQKDS	P	3.04381
39	FLILILLVLLLLLLLLLFLFLLWFLILLLLLLFLLFVLLLLLLLIWFLLMVLWLLLLLLLVLLLLLLLLLLLLLVLLLLLLLLLLLLLLLLLLLLLLLLLLLLLLLLVLLVLVLFLLLLLLLLLLLLLLLLLLLLLLLLLLVILLLLLLLLLLLLLLLLLLLLLLLLLLLLLLLLLCMLVMLLLLLVFILVLLLLLLLILLVLLLLLMFLLPPMLLMLLLVLILLLLVVLL	F	1.19898
40	KKKRKKRKRKKKRRRRKKRRRRFERKKRRKRRQQRRKRCISWKKNFWIIKNIFKKKKKKKHKKRKKKKKKKKKKNRKKKKKKKKKKKKKKKKKKKKKIKKIHKKKKKNVHIRQQKDTKKRQQQKQKQQQQQQQQRQQWLKRNKSSKKTKQQQQQQQQLQQKKKKKKKKKKKKKKKKCRRRKKKQRRSNKKVQKEEEEEKVVQQAQQQKEKKKRQQRQQQKKRYASAAIKVR	K	2.65049
41	VVVVVVVVVVVVVVVVVVVVVVLVVVVVVVVIVVVVVVVVIVLLLVVVLVLLVLVVVVVVIVILVVVVVVVVLVLLLVVVVVVVVVVVVVVVVVVVVLMVLVLLVLVLLVVPIVVVVVVLPPPPPPPPPPPPPPPPPPPVVIVVVVVVVPPPPLLLLPLPVVVVVVVVVVVVVVVVLLPVPLVPPVLIVVIPPPPPPPVLLVVPPPPLVVVVVPPPPPPPVVVPLPPLVVV	V	1.54563
42	TNTNTKNSDNDNNNDNNNNTNARTSTNNAQADTSATSNNNSKKQRRKNKNSKRQNQQQQQRQQQQQQQQQQQQQSQKQQQQQQQQQQQRQQQQQQQQKQQKNQQQQQSKKKRARNTDDDQKQQQQQQQQQQQQQHQQQHNSKHHHDDDNQQQQQQQQQQQNNNNNNNNNNNNNNNNKQESCQQQRRKSNDKQKEEEEETKKRKQKQRSKNNHHRELQKRQKKNQQKQKKTA	T	2.75751
43	KKKKKKKRKKKKKKKKKKKKKKKKKKKKKKKKKKKKRKKKKKKKKKKKKKKKKKKKKKKKKKKKKKKKKKKKKKKKKKKKKKKKKKKKKKKKKKKKKKKKKKKKKKKKKKKRKKVKKKKKRHHHHHHHHHHHHHNRHHHKKKKKKKKKKHHHHHHHHRHHKKKKKKKKKKKKKKKKSKKKRKKHHKMKKKKHHRRRRRKKKKKKHHRKKKKVVRRCQRHRKKKRRRRKKKK	K	1.29674
44	IVVIVVVVVVVVVVVVVVIVIVVVVVVLVVVVVVVVVVVVIVVIVVVVVVVVVIVVVVIVLVVVVVVVVVVVIVVVVVVVVVVVVVVVVVVVVVVVIVVVVVIIVIVVVVVVVVVCVVVVVVVVVVVVVVVVVVVVVVVVVILVVVVVVVVVVVVVVLVVVVVVVVVVVVVVVVVVVVVVIIVVVMVVVVVVVVVVVVVVVVIVVVVVVVVVVVVVVVVVIVLVVVVVVMV	I	0.652781
45	EEEEEEEQEEEEEEEEEEEEEEEEEEEEEEEEEEEEQEEEEEEEEEEEEEEEEEEEEEEEEEEEEEEEEEEEEEEEEEEEEEEEEEEEEEEEEEEEEEEEEEEEEEEEEEEEEEEEEEEEEEEEEEEEEEEEEEEEEEEEEEEEEEEEEEEEEEEEEEEEEEEEEEEEEEEEEEEEEEEEEEEEEEEEEEEEEEEEEEEEEEEEEEEEEEEEEEEEEEEEEEEEEEEEEEE	E	0.0717591
46	PPPPPPPPPPPPPPPPPPPPPPPPPPPPPPPPPPPPPPPPPPPPPPPPPPPPPPPPPPPPPPPPPPPPPPPPPPPPPPPPPPPPPPPPPPPPPPPPPPPPPPPPPPPPPPPPPPPPPPPPKPPPPPPPPPPPPPPPPPPPPPPPPPPPPPPPPPPPPPPPPPPPPPPPPPPPPPPPPPPPPPPPPPPPPPPPPPPPPPPPPPPPPPPPPPPPPPPPPPPPPPPPPPPPPPP	P	0.0402221
47	WWWWWWWWWWWWWWWWWWWWWWWWWWWWWWWWWWWWWWWWWWWWWWWWWWWWWWWWWWWWWWWWWWWWWWWWWWWWWWWWWWWWWWWWWWWWWWWWWWWWWWWWWWWWWWWWWWWWWWWWWWWWWWWWWWWWWWWWWWWWWWWWWWWWWWWWWWWWWWWWWWWWWWWWWWWWWWWWWWWWWWWWWWWWWWWWWWWWWWWWWWWWWWWWWWWWWWWWWWWWWWWWWWWWWWW	W	0
48	NNNNNNNNNNNNNNNNNNNNNNNNNNNNNNNNNNNNNNNNNNNNNNNNNNNNNNNNNNNNNNNNNNNNNNNNNNNNNNNNNNNNNNNNNNNNNNNNNNNNNNNNNNNNNNNNNNNNNNNNNNNNNNNNNNNNNNNNNNNNNNNNNNNNNNNNNNNNNNNNNNNNNNNNNNNNNNNNNNNNNNNNNNNNNNNNNNNNNNNNNNNNNNNNNNNNNNNNNNNNNNNNNNNNNNN	N	0
49	SSSSSSSSSSSSSSSSSSSSSSSSSSSSSSSSSSSSSSSSSSSSSSSSSSSSSSSSSSSSSSSSSSSSSSSSSSSSSSSSSSSSSSSSSSSSSSSSSSSSSSSSSSSSSSSSSSSSSSSSSSSSSSSSSSSSSSSSSSSSSSSSSSSSSSSSSSSSSSSSSSSSSSSSSSSSSSSSSSSSSSSSSSSSSSSSSSSSSSSSSSSSSSSSSSSSSSSSSSSSSSSSSSSSSSS	S	0
50	VVVVVVVVVVVVVVVVVVVVVVVVVVVVVVVVVVVVVVVVVVVVVVVVVVVVVVVVVVVVVVVVVVVVVVVVVVVVVVVVVVVVVVVVVVVVVVVVVVVVVVVVVVVVVVVVVVVVVVVVVVVVVVVVVVVVVVVVVVVVVIVIIVVVVVVVVVVVVVVVVVVVVVVVVVVVVVVVVVVVVVVVVVVVVVVVVVVVVVVVVVVVVVVVVVVVVVVVVVVVVVVVVVVVVVV	V	0.100001
51	RRRRRRRRRRRRRRRRRRRRRRRRRRRRRRRRRRRRRRRRRRRRRRRRRRRRRRRRRRRRRRRRRRRRRRRRRRRRRRRRRRRRRRRRRRRRRRRRRRRRKRRRRRRRRRRRRKRKRRRRRRRRRRRRRRRRRRRRRRRRRKRKKRRRRRRRRRRRRRRRRRRRRRRRRRRRRRRRRRRRRRRRRRRRRRKRRRRRRRRRRKKRRRRRRRRRRRRRRRRRRRRRRRRRKRR	R	0.257179
52	VVVVVVVVVVVVVVVVVVVVVVIVVVVVVVVVVVVVVVVVVVVVVVVVVVVVVVVVVVVVVVVVVVVVVVVVVVVVVVVVVVVVVVVVVVVVVVVVVVVVVVVVVVVVVVVVVVVVVVVVVVVVVVVVVVVVVVVVVVVVVVVVVVVVVVVVVVVVVVVVVVVVVVVVVVVVVVVVVVVVVVVVVVVVVVVVVVVVVVVVVVVVVVVVVVVVVVVVIVIVVVVVVVVVVVV	V	0.100001
53	TTTTTTTTTTTTTTTTTTTTTTTTTTTTTTTTTTTTTTTTTTTTTTTTTTTTTTTTTTTTTTTTTTTTTTTTTTTTTTTTTTTTTTTTTTTTTTTTTTTTTTTTTTTTTTTTTTTTTTTTTTTTTTTTTTTTTTTTTTTTTTTTTTTTTTTTTTTTTTTTTTTTTTTTTTTTTTTTTTTTTTTTTTTTTTTTTTTTTTTTTTTTTTTTTTTTTTTTTTTTTTTTTTTTTTT	T	0
54	FFFFFFFFFFFFFFFFFFFFFFFFFFFFFFFFFFFFFFFFFFFFFFFFFLFFFFLFFFFFLFFFFFFFFFFFFFFFFFFFFFFFFFFFFFFFFFFFFFFFFFFFFFFFFLLFLMFFLLLFFFFFFFFFFFFFFFFFFFFLFFLFFLLLLFFFFFFFFFFFLLLLLLLLLLLLLLLLFFFFFFFFFFFLLLVFFFFFFFLFFLFFFFFLLLLFFFFFFFFFIFIFFFFFLFF	F	0.821692
55	NSNSNSSNSSSSSSSSSSSNSTSNNNSSTNTSSNTNNSSSNTNNTSTSNTNNSNTNNNNNSNNNNNNNNNNNNNNNNNNNNNNNNNNNNNNNNNNNNNNNNTNNNNNNNSNNKMSNSSSNNNNNNNNNNNNNNNNNNNNSSSSNNSSSSNNNNNNNNNNNSSSSSSSSSSSSSSSSNNNNNNSNNSTSSSNNNNNNNNNNNTTNNNNNKSSSSNNSNNNNSSTNNSNNTST	N	1.31794
56	IIIIIIIIIIIIIIIIIIIIIIIIIIIIIIIIIIIIIIIIILIIIILIIIIIIIIIIIIIIIIIIIIIIIIIIIIIIIIIIIIIIIIIIIIIIIIIIIIIIIIIIIIIIVIIIIVIIIIIIIIIIIIIIIIIIIIIIIIVLIIIIIIIIIIIIIIIIIIIVVVVVVVVVVVVVVVVLIIIIIIIIIIVIIIIIIIIIILIIIIIIIILLIIIIIIVIIIIILVILIIIIVI	I	0.69911
57	PPPPPPPPPPPPPPPPPPPPPPPPPPPPPPPPPPPPPPPPPPPPPPPPPPPPPPPPPPPPPPPPPPPPPPPPPPPPPPPPPPPPPPPPPPPPPPPPPPPPPPPPPPPPPPPPPPPPPPPPPPPPPPPPPPPPPPPPPPPPGPPPPPPPPPPPPPPPPPPPPPPPPPPPPPPPPPPPPPPPPPPPPGPPPPPPPPPPPPSPPPPPPPPSPPPPPPPPPPPPTGPPPPPTPPP	P	0.243081
58	RRLRLKRRKRRRRRRRRKRHRRKRRLRRRRRKRRRRRRRKPRRRKRRKRRKRRRHRRRRRRRRRRRRRRRRRRRPRRRRRRRRRRRRRRRRRRRRRRKRRLRRRRRRQRRRRRPQVKKKRRRRRRRRRRRRRRRRRRRRRPRRRRKKKKRRRRRRRRRRRRRRRRRRRRRRRRRRRRRRRRRRRRARRKKKRKRRRRRDRRKRRRRRAAKKRRRRRRRRRKQRRRRRKRRR	R	1.09421
59	EEEEEEESEEEEEEEEEEEEEEEEEEEEEEEDGEEESEEEEDEEEEEEEDEEEEDEEEEEEEEEEEEEEEEEEEEEEEEEEEEEEEEEEEEEEEEEEEEEEEEEEEEEEEQDEEEEEEEEDDDDDDDDDDDDDDDDDDEADEEHHEEEEEEEDDDDDDDEAAAAAAAAAAAAAAAAEEEDEEEDDEDEEEEEEEEEEEDDEEEEDDDDDDDEEDDDDDDEEDEEEEEEDEE	E	1.3304
60	AAAAAAAAAAAAAAAAAAAAAAAAAAAAAAAAAAAAAAAAAAAAAAAAAAAAAAAAAAAAAAAAAAAAAAAAAAAAAAAAAAAAAAAAAAAAAAAAAAAAAAAAAAAAAAAAAAAAAAAAAAAAAAAAAAAAAAAAAAAAAAAAAAAAAAAAAAAAAAAAAAAAAAAAAAAAAAAAAAAAAAAAAAAAAAAAAAAAAAAAAAAAAAAAAAAAAAAAAAAAAAAAAAAAAAA	A	0
61	AAAAAAAAAAAAAAAAAAAAAAAAAAAAAAAAAAAAAAAAAAAAAAAAAAAAAAAAAAAAAAAAAAAAAAAAAAAAAAAAAAAAAAAAAAAAAAAAAAAAAAAAAAAAAAAAAAAAAAAAAAAAAAAAAAAAAAAAAAAAAAAAAAAAAAAAAAAAAAAAAAAAAAAAAAAAAAAAAAAAAAAAAAAAAAAAAAAAAAAAAAAAAAAAAAAAAAAAAAAAAAAAAAAAAAA	A	0
62	QLQLQLLQLLLLLLLLLLLQLSCQQQLLLELLQQTQQLLLQLEEVVLLWQAHIEQEEEEEIEEEEEEEEEEEEEAEEEEEEEEEEEEEEEEEEEEEEVDETVEEEEEAVRLELIQEVVIEEEEEEEEEEEEEEEEEEEEAELLTTVVIVEEEEEEEEDEEAAAAAAAAAVAAAAAMVDELEEEEEEQAVSEEEEEEEEQIVILEEEEQYAARREDEDEDEQESEEEELTLL	Q	2.53331
63	RRRRRRRRRRRRRRRRRRRRRRRRRRRRRRRRRRRRRRRRRRRRRRRRRRRRRRRRRRRRRRRRRRRRRRRRRRRRRRRRRRRRRRRRRRRRRRRRRRRRRRRRRRRRRRRRQQRKKKRRRRRRRRRRRRRRRRRRRRRRRRRHHRRRKRRRRRRRRRRRRRRRRRRRRRRRRRRRRRRRRRRRRRRRKKRRRRRRRRQRRRRRRRRYKKKRRRRRRRRRKRKRRRRRRRR	R	0.486024
64	LLLLLLLLLLLLLLLLLLLLLLLLLLLLLLLLLLLLLLLLLLLLLLLLLLLLLLLLLLLLLLLLLLLLLLLLLLLLLLLLLLLLLLLLLLLLLLLLLLLLLLLLLLLLLLLLLLLLLLLLLLLLLLLLLLLLLLLLLLLLLLLLLLLLLLLLLLLLLLLLLLLLLLLLLLLLLLLLLLLLLLLLLLLLLLLLLLLLLLLLLLLLLLLLLLLLLLLLLLLLLLLLLLLLLLL	L	0
65	RRRRRRRQRRRRRRRRRRRRRRHRRRRRRRRRRRRRQRRRQRRRRHRRKRRKHRRRRRRRRRRRRRRRRRRRRRRRRRRRRRRRRRRRRRRRRRRRRRRRRQRRRRRRKAKRRRCARRRRRRRRRRRRRRRRRRRRRRRRRRRRRRRRRRRRRRRRRRRRRRRRRRRRRRRRRRRRQRRKRRRRRRRSRRKRRRRRRRRKKRRRRRRMKRRHNRRRRRRRKRQRRRRKRRR	R	0.800934
66	QEQEQEEQEEEEEEEEEEEQEQQQQQEEQIQEQQQQQEEEHQLIQQQEQAEQQIHIIIIIHIILIIIIIIIIIIELMIIIIIIIIIIIIIIIIIIIVQLIQQIIIIIEQQQLQRRRKKRLLLLLLLLLLLLLLLLVLLLASDQSSRRRQLLLLLLLLLLLAAAAAQAAAAAAAAAAELLHLIILLVQRQQLLILLLLLQQQQQLLLLQHQQLLILLLLLLQSVLLLLQQQQ	Q	2.72032
67	LLLLLLLLLLLLLLLLLLLLLLLLLLLLLLLLLLLLLLLLLLLLLLLLLLLLLLLLLLLLLLLLLLLLLLLLLLLLLLLLLLLLLLLLLLLLLLLLLLLLLLLLLLLLLLLLLLLLLLLMLLLLLLLLLLLLLLLLLLLLLLLLLLLLLLLLLLLLLILLLLLLLLLLLLLLLLLLLLMLLLLLLLLLLLLLLLLLLLLLLLLLLLLLLLLLLLLMLLLLLLLLLLLFLLL	L	0.180254
68	AAAAAAAAAAAAAAAAAAAAAAAAAAAAAAAAAAAAAAAAAAAAAAAAAAAAAAAAAAAAAAAAAAAAAAAAAAAAAAAAAAAAAAAAAAAAAAAAAAAAAAAAAAAAAAAAAAVAAAAAAAAAAAAAAAAAAAAAAAAAAAAAAAAAAAAAAAAAAAAAAAAAAAAAAAAAAAAAAAAAAAAAAAAAAAAAAAAAAAAAAAAAAAAAAAAAAAAAAAAAAAAAAAAAAAA	A	0.0402221
69	EAEAEAAEAAAAAAAANAAQAQQEEESAQQQSQEQEEATAQQQQQQEAQQQQQQQQQQQQSQQQQQQQQQQQQQQQQQQQQQQQQQQQQQQQQQQQQAQQQQQQQQQQQQEQQQEEAAAQQQQQQQQQQQQQQQQQQQQMERNQQAAAAQQQQQQQQQQQAAAEAAAAAAAAAAAARQQEQQQQQEQASANQQQQQQQEQQQQQQQQEESSQQQQQQQQQQGQQQQQQHQQ	E	1.58457
70	HQRQRQQTQQQQQQQQEQQRQQAREREQESQQREQRTQEQNRGNQARQQARQANQSSSNSESSGSSSSSSSSNSRGNSSSSSSSSSSSSSSSSSSSSHNSQQNNSNSRQTQNEQTAEEENNNNNNNNNNNNNNNNNNNNGAGDNNEEEENNNNNNNNNNNAAAAAAAAAAAAAAAASNNRNNNNNAGAEEQNNNNNNNHQQNTNNNNRQEEAAHNCNNNNQQQNNNNQSQQ	H	2.7361
71	GGGGGGGRGGGGGGGGGGGGGGGGGGGGGNGGGGGGRGGGDGNNGGGGGGGGGNGNNNNNGNNNNNNNNNNNNNGNNNNNNNNNNNNNNNNNNNNNNGNNGANNNNNGGNGNGGEGGGGNNHNNNNNNNNNNNNNNNNNGGGGGGGGGGNNNNNNNNNNNGGGGGGGGGGGGGGGGGNNGNNNNNGNRGGNNNNNNNNGGGGGNNNNGRGGGGNNSNSNNGGGNNNNGGGG	G	1.31428
72	DSDSDSSNSSSSSSSSSSSDSDDDSDSSDNDSDSDDNSSSSDNNNDDSNDDDDNHNNNNNSNNNNNNNNNNNNNDNNNNNNNNNNNNNNNNNNNNNNDNNDDNNNNNDHGNQSSPDNNNNQQQQQQQQQQQQQQQQQQQAGNSDDNNNNQQQQQQQQQQQAAAAAAAAAAAAAAAADQNDQNNQQGPDSSDQQQQQQQDHHNNQQQQDDSSEEQHQHHHQSGDQQQQNNDD	D	2.51734
73	RSRPRAPQASPPPPASPTPHPAAHQRSPQQHSHQANQPSSQQQQAQRSVALSQQHQQQQQQQQQQQQQQQQQQQPQQQQQQQQQQQQQQQQQQQQQQRQQATQQQQQPAQSQSSHQHSNQQQQQQQQQQQQQQQQQQQQPEQQPPSSSSQQQQQQQQQQQPPPPPPPPPPPPPPPPNQQNQQQQQEQSTAAQQQQQQQSVAEDQQQQSGNNPPQQQQQQQPEAQQQQADAH	R	2.27036
74	VTVTVTAQSLTTTTTTTTTVTAAVAVTTAQAIVAASQTANLAQQTAANTANTAQAQQQQQQQQQQQQQQQQQQQNQQQQQQQQQQQQQQQQQQQQQQTQQTAQQQQQNAVRQSAVVAAAQQQQQQQQQQQQQQQQQQQQQVAQSSAAAAQQQQQQQQQQQQQQQQQQQQQQQQQQQAQQKQQQQQVQRAAAQQQQQQQTAAATQQQQNIAAAAQQQQQQQVVTQQQQTSTS	V	1.9804
75	LLLLLLLLLLLLLLLLLLLLLLLLLLLLLLLLLLLLLLLLLLLLLLLLLLLLLLLLLLLLLLLLLLLLLLLLLLLLLLLLLLLLLLLLLLLLLLLLLLLLLLLLLLLLLLLLLLLLLLLLLLLLLLLLLLLLLLLLLLLLLLLLLLLLLLLLLLLLLLLLLLLLLLLLLLLALLLLLLLLLLLLLLLLLLLLLLLLLLLLLLLLLLLLLLLLLLLLLLLLLLLLLLLLLLL	L	0.0402221
76	RTRTRATRKTTTTTTTTTTRTARKARTTTRTTRSARRTTTQRRRLRRTRQHRRRRRRRRRRRRRRRRRRRRRRRHRRRRRRRRRRRRRRRRRRRRRRLRRKTRRRRRHKRRRRRRRRRRRRRRRRRRRRRRRRRRRRRRRAKRRRRRRRRRRRRRRRRRRRRRRRRRRRLRGRRRRIRRQRRRRRARLRRRRRRRRRRRRKRRRRRRRRRRRRRRRRRRRKGSRRRRRRRT	R	1.34332
77	EQEQDQQDQQQQQQQQQQQEQHQDAEQQQDQQDAHDDQQQNEDDQQDQQAKQQDTDDDDDADDEDDDDDDDDDDKDDDDDDDDDDDDDDDDDDDDDDEDDQQDDDDDKEDQDDEMDAAADDEEDDDDDDDDDDDDEDDDARDANNAAAEDDDDDDDDDDDAAAAAAAAAAALAAAANDDEDDDDDREDAANDEDDDDDNEEQQDDEDEEAASSDDDDDDDSRRDDDDSQTQ	E	2.23419
78	LLLLLLLLLLLLLLLLLLLLLLLLLLLLLLLLLLLLLLLLLLLLLLLLLLLLLLLLLLLLLLLLLLLLLLLLLLLLLLLLLLLLLLLLLLLLLLLLLLLLLLLLLLLLLLLLLLLLLLLLLLLLLLLLLLLLLLLLLLLLLLLLLLLLLLLLLLLLLLLLLLLLLLLLLLLTLLLLLLLLLLLLLLLLLLLLLLLLLLILLMMLLLLLMLLLLLLLLLLLLLLLLLLLMLL	L	0.206291
79	GGGGGGGGGGGGGGGGGGGGGGGGGGGGGGGGGGGGGGGGGGGGGGGGGGGGGGGGGGGGGGGGGGGGGGGGGGGGGGGGGGGGGGGGGGGGGGGGGGGGGGGGGGGGGGGGGGGGGGGGGGGGGGGGGGGGGGGGGGGGGGGGGGGGGGGGGGGGGGGGGGGGGGGGGGGGGGGGGGGGGGGGGGGDGGGGGGGGGGGGGGGGGGGGGGGGGGGGGGGGGGGGGGGGGGG	G	0.0402221
80	IIIIIIIIIIIIIIIIIIIIIIIIIIIIIIIIIIIIIIIIIIIIIIIIVIIVIIIIIIIIIIIIIIIIIIIIIIIIIIIIIIIIIIIIIIIIIIIIIVIIVIIIIIIIVVVIIIIIIIIIIIIIIIIIIIIIIIIIIIIIIIIIIIIIIIIIIIIIIIIIIIIIIIIIIIIWIIIIIIIVIIIIIIILIIIIIIIIIIIVVVVIIIIIVIIIIIIIIIIIIIIIIIIVVII	I	0.426306
81	LLLLLLLLLLLLLLLLLLLLLLLLLLLLLLLLLLLLLLLLLLLLLLLLLLLLLLLLLLLLLLLLLLLLLLLLLLLLLLLLLLLLLLLLLLLLLLLLLLLLLLLLLLLLLLLLLLLLLLLLLLLLLLLLLLLLLLLLLLLLLLLLLLLLLLLLLLLLLLLLLLLLLLLLLLLKLLLLLLLLLLLLLLLLLLILLLLLLLLLLLLLLLLLLLLLLLLLLLLLLLLLLLLLLLL	L	0.0804172
82	SSSSSSSASSSSSSSSSSSSSSSSSSSSSSSSSSSSASSSSSSSSSSSASTASSSSSSSSSSSSSSSSSSSSSSSSSSSSSSSSSSSSSSSSSSSSSASSASSSSSSTASASSSSSSSSSSSSSSSSSSSSSSSSSSSSSSSSSSSSSSSSSSSSSSSSSSSSSSSSSSSSFSSSSSSSSSSSSSSSASSSSSSSSSSSAASSSSSSSASSSSSSSSSSSTSSSSSSASTS	S	0.476862
83	VVVVVVVVVVVVVVVVVVVVVVVVVVVVVVVVVVVVVVVVVVVVVVVVVVVVVVVVVVVVVVVVVVVVVVVVVVVVVVVVVVVVVVVVVVVVVVVVVVVVVVVVIVVIVVVVVVVIVVVVVVVVVVVVVVVVVVVIVVVVVVVVVVVVVVVVVVVVVVVVVVVVVVVVVVVKVVVVVVVVVVVVVVVVVVLVVVVVVVVVVVVVVVVVVVVVVVVVVVVVVVVVVVVVVVV	V	0.206291
84	QQQQQQQQQQQQQQQQQQQQQQQQQQQQQQQQQQQQQQQQQQQQQQQQQQQQQQQQQQQQQQQQQQQQQQQQQQQQQQQQQQQQQQQQQQQQQQQQQQQQQQQQQQQQQNQQQQQQQQQQQQQQQQQQQQQQQQQQQQQQQQQQQQQQQQQQQQQQQQQQQQQQQQQQQQQRQQQQQQQQQQQQQQQQQQQQQQQQQQQQQQQQQQQQQQQQQQQQQQQQQQQQQQQQQQI	Q	0.120585
85	VVIVIVVVVVVVVVVVVVVIVVVVVIVVVIVVIVVIVVIVVVIIVVLVIVVIVIVIIIIIVIIIIIIIIIIIIIVIIIIIIIIIIIIIIIIIIIIIIIIILVIIIIIVIVIIVVVVLLLIIIIIIIIIIIIIIIIIIIILLIVLLLLLLIIIIIIIIIIILLLLLLLLLLLHLLLLIIIIIIIIILIVLLMIIIIIIIVIIVIIIIILILLVVIIIIIIIVLVIIIIIIVS	V	1.47315
86	EEEEEEEEEEEEEEEEEEEEEEEEQEEEEEEEEQDEEEEEEEEEEEEEEEEEEEDEEEEEEEEEEEEEEEEEEEEEEEEEEEEEEEEEEEEEEEEEEEEEEEEEEEEEEHEEEQEEEEEEEEEEEEEEEEEEEEEEEEEDRDEEEEEEEEEEEEEEEEEEDDDDDDDDDDDIDDDDAEEEEEEEEPEAEEEEEEEEEEDEEQQEEEEDEEEQQEEEEEEEDREEEEEEQEL	E	0.962348
87	GGGGGGGGGGGGGGGGGGGGGGGGGGGGGGGGGGGGGGGGNGGGGGGGGGNGGGGGGGGGGGGGGGGGGGGGGGNGGGGGGGGGGGGGGGGGGGGGGGGGGDGGGGGNGDGGGGGGGGGGGGGGGGGGGGGGGGGGGGGGSGGNNGGGGGGGGGGGGGGGGGGGGGGGGGGGGDGGNGGGGVAGGSGQGGGGGGDGGGGGGGGGGGGGGGGGGGGGGGGGGPGGGGGGGGI	G	0.591383
88	DDDDDDDQDDDDDDDDDDDDDDDEDDDDDEDDDDDDHDDENDEEDDDEDDGDDEDEEEEEDEEEEEEEEEEEEEGEEEEEEEEEEEEEEEEEEEEEEDEED-EEEEAGDGDEDDSGDDEEEEEEEEETEEEEEEEEEEEDEDDGGEEEDEEEEEEEEEEEDDDDDDDDDDD-DADDGEEDEHAEEGEDDDDEEETEEEQDDDDEEEEQDDDDDEEEEEEEDADEEEEDDDA	D	1.6004
89	QQQQQQQCQQQQQQQQQQQQQQQQQQQQQGQQQQQQQQQVDQGGEQQVQQEQQGQGGGGGQGGGGGGGGGGGGGEGGGGGGGGGGGGGGGGGGGGGGEGGQQGGGGHEQDHGQQQQTTTGGGGGGGGHGGGGGGGGGGGAQDQNNTTTSGGGGGGGGGGGAAAAAAAAAAA-AGAAEGGTGPKGGQGHTTRGGGMGGGQQQSSGGGGQSTTQQSGGGGGGQEQGGGGQSQG	Q	2.25751
90	VVVVVVVLVVVVVVVVVVVVVLVVVVVVVAVVVVLVEVVILIAAVVIILVTIVAIAAAAAVAAAAAAAAAAAAAAAAAAAAAAAAAAAAAAAAAAAAVAALVAAAALTLRLAVKLVVVVIPAAAAAANAAAAAAAASAAAVVVVVVVVVAAAAAAAAAAAAAAAAAAAAAA-ATAAQAIIATSAAVVYVVVPAADAAAVLLQQPAAAVAVVVVAVAAAAALVMPPPPIQVR	V	2.13616
91	IIIIIIIIIIIIIIIIIIIIIIIIIIIIIIIIIIIIVIISVIIIICISIIIIIIIIIIIIIIIIIIIIIIIIIIIIIIIIIIIIIIIIIIIIIIIIIIIIIIIIIIDIIVVIIINILLLIIIIIIIISIIIIIIIIIIIVIIIIILLLIIIIIIIIIIIIVVVVVVVVVVV-VSVVLIIVICGIIIVTIIIIIIPIIIIIIIIIIIIIIIIIIIIIIIIIIIIIIIIIIIF	I	1.06217
92	TSTSTSSMSSSSSSSSSSSTSSSTSTSSSNSSTSSTVSSLNSNNSQSLSSSSSNSNNNNNSNNNNNNNNNNNNNSNNNNNNNNNNNNNNNNNNNNNNSNNSSNNNNPSSLSNSRASSSSNNNNNNNNWNNNNNNNNNNNSSRSDDSSSSNNNNNNNNNNNSSSSSSSSSSS-SRSSDNNANARNNSRLSSSNNNMNNNSSSASNNNNSSSSSSNNNNNNNSSSNNNNSSSG	T	1.84505

## Sheet: NCOA6 others
1	TTTTTTMTNNPPNP-SSMPPTPP-PPTPPPN-NPSPGNPRTPNNNTNNNNNKNNDNENGDNDDDYDIDDDDDDDDDDDDDDDDNDDNDDDDDDDDDDDDDDDDDDDDDDDNDDDDDDNDNDDDDADTDDNDDTENDDDDDNDDTDHDTDETTEDGDDDDDNHDDDECNDDCEGSHGLGDDDDDVDDQNTGPDRSSDNY	T	2.63454
2	SSSASSSSGGGGGG-GGSGGGGG-GGSGGGG-GGGGSGGGEDGGGGGGGGGGGGGGGGLSSSSSGSGSSSFSSSSSSSFSFFSGSSGSSESSSSSSSSSSSSFSSSSSSSSSSSSSSSSISSFFTSSSSGCFSSGFSFFFGGFTSSTSFFSSFFSSFSFFGFFFFDASFFTSSSSSASFFFFFIFFDGSSAFILLGGI	S	2.11038
3	DDDENNNNYYTTYT-FFNTSFTA-TTDTTTF-YTYTVYTFRAYYYYFFFCYFYYFYFFTTTTTTYTYTTTTTTTTTTTNTNNTFTTFTTQTTTTTTTTTTTTTTTTTTTTTTTTTTTTTPTTNNTTTTTYTNTTYTTTTTSFTTTLTTTTTTTTATNTTTFTTTTYTNTTTTLFTLTATTTTTKTNGFNTKTVTTYYE	D	2.17919
4	AAAATITTKKRRTQ-RRIRRQRQ-QRLKRRK-KRIRVKKQSKKVVGRVREKKETKKKQIIIIIIKIQIIIIIIIIIIIIIIIIKIIKIIEIIIIIIIIIIIIIIIIIIIIIIIIIIVIIAIIIIIIIIVRIIIVQVIIVIRKVIIIIIVVIIVVVIIVVVKIVVVIIIVVIVDIVDTVVVVVVTVIHTVILVTAASKT	A	2.54385
5	FYFYYYYYFYVVFV-NNYVNKVV-VVRVVVH-HVNVQNVYPAKYYYHKNNHVYKHEHHFFFFFFFFNFFFFFFFFFFFFFFFFNFFNFFHFFFFFFFFFFFFFFFFFFFFFFFFFFLYFVFFFFFFYFFNFFYFFFFFFFLHWFFFFFFFFFFFFFFFFFNFFFFEFFFFFFKVFKVFFFFFFVFFKHQYVFVVVVYV	F	2.15233
6	LLMLVVLWVVMMLMMIIVMVLMMMMMVMMMVMVMLMLVMVVMVAAVVVVAVAVVVVILIVVMMVVVVMVVVVVVVVVVVVVVVVVVVVLVVVVVVLVVVVVVVVVVVVVVVVVVVVIVVLVVVVVVVLIVVVVIIIVVVVVVIVVVVVVVVVVVIIIVVVVVVVVTVIVVVILIVLLIVVVVVVVVVLLILVVVVTLV	L	1.61429
7	VVVVVVVVKKIIKIIQQVIYHIIIIIVIIIKIKIKITQIHSIEDDNKKQYDKKQQAQTAAAAAAKALAAAAAAAAAAAAAAAAQAAHAAKAAAAAAAAAAAAAAAAAAAAAAAAAAAAATAAAAAAAAARASAAKAAAAAHYAAASAAAAAASAAAAAAARAAAAVAAAAAAVTAVTAAAASATASSRIATATIIVKT	V	2.42217
8	VIFVVVIVFFAAFAAVVVAFFAAAAALAAAFAFAVAIFAFFIIFFFFFFFFFFFFFFIFFFFFFVFFFFFFFFFFFFFFFFFFFFFFFFFFFFFFFFFFFFFFFFFFFFFFFFFFFFFFVFFFFFFFFFFFFFFFFFFFFVFFFFFFFFFFFFFFFFFFFFFFFFFFFFFFFVCFVCFFFFFFCFFLFIFCFCCCVFC	V	1.31927
9	HHRQHHNHHHKKHKKHHQKHHKKKKKNKKKHKHKHKHHKHHEHHHHHHHHHHHHHHHHKKKKKKHKHKKKRKKKKKKKRKRRRHKKHKKHKKKKKKKKKKKKQKKKKKKKQKKKKKRKKRKKRRKKKKQHKQKQHQRRQRHHKKKKKKRQKKKQQKKQQQHKQQQTKKQQKLTKQTKQQQQQQKQRHHDQTQEEETHE	H	2.11766
10	GGGGGGGGVVVVIVVVVGVVVVVVVVGVVVIVIVVVGVVVIVIIIFVVVVIVIVVVVVGGGGGGVGVGGGGGGGGGGGGGGGGVGGVGGVGGGGGGGGGGGGGGGGGGGGGGGGGGGGGGGGGGGGGGGVGGGGVGGGGGVVGGGGGGGGGGGGGGGGGGIGGGGCGGGGGGCGGCGGGGGGGGGGVVGGGGGGGCIG	G	1.26073
11	QQQQTTQPAAEDADDLLQEVLDDDADPADDGDGDNDHRASSKQGGEGKNNRQGQEQDDNNDNNNANKNNNNNNNNNNNNNNNNRNNVNDMNNNNNDNNNNNNNNNNNNNNNNNNNNNNNNNNNNNNNNNVNNNNANNNNNRTNNDNNNNNNNNNNNNNNNDNNNNENNNNNSHNNHDNNNNDNNNNVSENNDNNNEED	Q	2.37018
12	RRSRVVRAGGRRGRRGGVRAGRCRDRTRRRGRGRGRTGRGGRKGGGGAGGGGGGGRGGMIIIIIGIGIIIMIIIIIIIMIMMMGIIAIIGIIIIIIIIIIIIMIIIIIIIIIIIIIMMIIIIMMLIIIMRMMMMGMIMMMGGMLIMLMMMMMMMMMMMMMALMMMGLMMMLMGIMGLMMMMMMLMMDGLMVMHLLGGF	R	2.63954
13	HNQHRRHHTTNDTDDNNRENEDHDDDGDDESDSDDDRNDTVDDSKSSHNDADKDNDNTEGKDDDTDNDDDDDDDDDDDDDDDENSGNDGYDDDDDGDDDDDDDDDDDDDDDDDDDDKDGGDGDDNDNGEYDENEGDGDEDNDKNGGDNDENNEEEDETEDNEDEEDDGEEYDHNEHREEQQDEDEDDKVESEDHHDAH	H	2.70957
14	MMMMMMMMRNYYNYYYYMYNYYYYYYMYYYEYEYNYMYYDTYFTTFYYYYLYMYFYFFARQTKKNKYKKREKKKTKKKEKEEKYRRYKT-KKKKKAKKKKKKEKKKKKKKEKKKKKALRAKREESDERDQVEEEDFTEEEYNDSREAEFEEEFFFEEEFEFEFFEPDEEFDEYHEYPFFDDEFPF-EFFEKFPPPPYP	M	3.29466
15	IIVIIIIIFYTTTTTSSVTFNTTTTTTTTTTTTTETVTTTDTGTTDVTTEFTNTQTQDDDDDDDYDSDDDDDDDDDDDDDDDDTDDYDDKDDDDDDDDDDDDDDDDDDDDDDDDDDDDDDDDDDDDDDDFDDDDTTDDDDDFDDDDDDTDDDTTSDDDTDSDTTDNDDDIDDNDDNTSTDDDTDT-NQGDDTEEETDE	I	2.15469
16	QQQQQQQQRRDDKAASSQAPKDAANDNNDDRARDYDEKNGRYGRKDRTPPSARRRRRRQEQKQKRKLQKEQKKKKKKKQKQQQPEETKQLKKKKKQKKKKKKQKKKKKKKQKKKKKTQEPKEQQQKQEKKQQRQQQEQAQQKVQEQQQQRQQQQQQKAQAFAQQVQQQNQQQPTKPPQQAAHRSHEFREQEQRPPPRH	Q	3.08522
17	EEEEEEEESSDDQDDEEEDEDDDDDDEDDDRDRDKDEEDRRDSQQDQEVGDDHESSSIQQQWWWSWEWWQEWWWWWWWEWEEEVQQEWQTWWWWWKWWWWWWEWWWWWWWEWWWWWNEQHWQEEEQEQEEDEEERKQERERENQQNEEKQEEKKKEDQKQEEKKQSQEQKHEEEMEYKKRRKKEKDTSEAEKQRRRGR	E	3.02977
18	TTTTTTTTATLLDLLRRYLDDLLLLITLILELEIQITQLEQLQEDLVQEQDQKNDYDKKKKKKKTKRKKKKKKKKKKKKKKKKEKKYKKDKKKKKKKKKKKKKKKKKKKKKKKKKKKKKRKKKKKKKKKDKKKKHLKKKKDKKKKKKKLKKKLLLKKKLKDKLLKRKNKLKKLKKLRLLKKLLKLFTEKKRLKKKQER	T	2.38739
19	IVVVLLILLLFFVFFIILFETFFFYFVYFFVFVFIFKIYVITILLEMIIILILILILLLLLLLLLLILLLLLLLLLLLLLLLLILLILLLLLLLLLLLLLLLLLLLLLLLLLLLLLLLLLLLLLLLLLLELLLLLELLLLVRLLLLLLDLLLDDELLLDLELEDLLLLLDLLHLLHLENLLNDFDQMLKLLDLFFLLL	I	2.13079
20	DDTDDDDDEEFFRFFKKDFLTFFFFFNFFFEFEFEFDEFSQMQEENEEREEGEIEHEEDDEDDDEDADDSDDDDDDDDDDDDDRDDTDDYDDDDDNDDDDDDDDDDDDDNDNNNNNDDDNDDDDDGDDDTNDDEDTDDDDERDDSDDDADDDSTCDDDTDTNTTDEDHDTDDFQDFRSTDDMTNTEEEDDATKRREEE	D	2.70274
21	RRHRHHHRAAFFNFFQKRFKKFFFFFHFFFNFNFAFRHFRKIEIIFNIRKSIHNAHAKKTKTATATEAAINATTAATTNTNNRKTTKTKKTTTTTHTTTTTTNTTTTTATNTTTTTTATATINNIVTINKSKTNHVTNTNENMTLSATITTTIIVGKSITKRIITDTNSITSKKTKHIVTTVIFIKDADNKVIHHRME	R	3.33225
22	HHQHLLHNIIRRLRRIILQIIRRRHRHHRRLRLGIRYIHLLYILLRLIIILILILVLIIIIIIIIIIIIIIIIIIIIIIIIIIIIIVIILIIIIIIIIIIIIIIIIIIIIIIIIIIIIIIIIIIIIIIIIIIIIVLIIIIIIIIIVIILLIILLLIIVLVMVLLVFLFVLIILIVLLLLIILLILLLLLIILILLVLF	H	1.95802
23	RRRRKRRRRRNSRRRKKRRKMRRRSRKKRRGRRRIRKVKQQHVRRSRKKKKKRVRIRRILILLLQLRLLLLLLLLLLLLLLLLQLLRLLRLLLLLLLLLLLLLLLLLLLLLLLLLLILLSLLLLLLLLLRLLLLRSLLLLKRVLLLLLSRLLSNRLLLNLKVNSVRKLLSLLHKLHVSSLLSSSSDLRVLKSVVVIRR	R	2.42242
24	HHGYNNRNASAANAADDNAKKAAAAAYLAASAGAEANELAGQKTAYGDEAGEAEAKADEEYEKESKEKKENKEEKKEKNENNYEEEEENGAEEEENEEEEEENEEEEEKENEEEEENNETEETTNDKKNESKQNRGENNNNENNENNHGGHHGGGHKNGSEIGGSKGESGNSWLSWGGGSSGGQGHQSGNTGDTTDSL	H	3.26943
25	NNLYCRNSATIILIITTSITTIIIIINIIIVIVIEINAILLVIENLYTITATLTTTTGNNGNNNTNTNNNGNNNNNNNRNRRGTNNTNTANNNNNNNNNNNNRNNNNNSNRNNNNNNGNWNNKKGNGNNTGRGGTISGGGTTNGNGEGIIGGIIISGGIGTGIIGGMSGIGGLHGLKIIGGIILIITQVNAIRKKNKH	N	3.06525
26	LLFLLLIIAAPPVPPVVLPVVPPPAPLAPPVPVPIPLVAVLPVIIQVVVVMVVVMVMVVVVVVVVVLVVVMVVVVVVVMVMMMVVVVVVVVVVVVVVVVVVVMVVVVVVVMVVVVVMMVLVVMMMVMVVVMMMVVPVMIMFVMMVIMMPPMMPPPMVIPIVIPPILPMIPMIILIILPPIIPPGPLVVLVLPLLLLIL	L	2.31474
27	AAARAAAASSKEAKKAAAQAAKKKKKRVKKAKAKAKAADSASAAALAAAASASAAAAAPPPPPPSPAPPPPPPPPPPPPPPPPAPPAPPSPPPPPPPPPPPPPPPPPPPPPPPPPPPPPQPPPPPPPPPSPPPPANPPPPVASPPPPPNSPPDNNPPPNPAPDNPRHPPNPPKSPKQNDPPNNDNKASAPENNKKQGK	A	2.40564
28	SSSSTTSSTTGEEEEAASEKSGEEAGSAGGKEEGQGRDAKKAAEEESAAAVAFGRVRKCGESNNASVNNGSNNNNNNNSNSSEDGGANNKNNNNNNNNNNNNSNNNNNSNSNNNNNCDGQNGSSEGDGDRDSDGQMGSNSGACPGDPDMMDDMVMGYNVNNSVMNDMGNMQGQRNQSMMNNIMLIRDRAGGMDHHDLE	S	3.53574
29	MLLLLLLLYYCCLLLIILLIILLLLLLLLLLLLLILIILLLFMLRLLIIILIAILILLLLLLLLYLLLLLMLLLLLLLMLMMMILLILLILLLLLLLLLLLLMLLLLLLLMLLLLLLMLMLLMMLLMLMIMMMMLLLMMMIMLMLMMMLLMMLLLLMVLMIILLILLMMLMLLLMLLLLMMLLLLMILLLLLLIILLL	M	1.54967
30	CCFCCCCIMM--L--VVC-IV-----T---L-L-L-GV-VL-LML-MLVVLVLLLILLLLILLLMLLLLLLLLLLLLLLLLLLVLLVLVLLLLLLVLLLLLLLLLLLLLLLLLLLLLLLALLLLLLLLLVLLLLL-LLLLLVLLLILL--LL---LIL-LVI--LLSLL-LLSSLSI--LL--C--VLLLS-LLL-LL	C	1.60141
31	GGGRGGRGNNDDLNNGGRDGGDNNADGEDDCNCDNDQEERVKDCCGCDGGRRCNFEFCNHNHHHNHNHHHEHHHHHHHEHEEQGHHGHSCHHHHHSHHHHHHEHHHHHHHLHHHHHDLHQHHEESRLHQGHELQGDHEDEQGGSHQSLDDLLDDAQGNDDGDNDNSMEDDSQNEDNSHDDDDHSD-DFRQKDCQQ-RS	G	3.26516
32	ATTITTITVVIVTIICCTICCVIIIIAVIVVIVIYITCVVTICVVIVCCCCCVCVCVIMMMMMMVMCMMMLMMMMMMMLMLLLCMMCMMCMMMMMMMMMMMMLMMMMMMMLMMMMMILMKMMLLLMLMLCLLLLCMMLMLCCMLMLLLMMLLMMLLLMMMCLLMMTELMMLLTSMTDMMMMMMSMPCVV-SMKQQ-VT	A	2.68763
33	SRRERRKRPPPPPPPTTRPSSPPPPPGPPPRPQPDPKEPPPPEPPPKTESPDPRPKPPEEEEEEPETEEEDEEEEEEEDEDDDNEETEEPEEEEEEEEEEEEDEEEEEEEGEEEEEGGEGEEDDGEGEDSGDGEQGEDGDAKDGEGGGGGGGGGGGGGGGSGGGDDGDGGGDEDDEKGGGGGGEGNEPE-KGEPPLPD	S	2.6672
34	RRRGRRRKSSHHVNNSSKELEENHEEGEEEHNHKKEKTQLENHPPRHTLSMKLTQEQASSCSSSSSSSSSSSSSSSSSSSSSASSSVSSESSSSSSSSSSSSSSSSSSSSSSSSSSSSSESSSSPSTSSIPSTSPHSSSSRTAPSPSTSSTTTSPLLSSSISPSSKPSSSPVTDSTESSSSSSSSSPPKLGSKKKGPS	R	2.76226
35	SSSSSSSSYHYYEVVEESMEKYVVYYSYYYEVEYRYSQYHAVEKKETATDHEDDEEQRRNGNSSHSKSSSDSSSSSSSESEEETNNESDKSSSSSDSSSSSSESSSSSSSESSSSSEENQSNEEETKNEEEDKQEENDDDEDEENEEPEEQQEDEEDEDEEEEEEREEEEEEEEKEKGEDDEDGEDTEEENGDKKGEN	S	3.00287
36	QQQDQQQQFFNNYNNEEQREDDYNKDQNDDDNDDNDNEKLTREFFCDDEEHEFEFDFFKKQKKKFKEKKKRKKKKKKKRKRRREKKEKQYKKKKKQKKKKKKRKKKKKKKKKKKKKRRKEKKIIRKRKRDRRRRHRKRRRERKRKRRRRRRRRRRRKKRRDTRRRKRRRRRRTLTTPRMRRRRSARDFSSSRGKKKFQ	Q	3.01727
37	IVVVVVVVVVFIVLLIILLIILLLFLVFLLVLVLILIIFVILIIIIVIIIIIVIITIVLLLLLLVLILLLLLLLLLLLLLLLMILLILLVLLLLLLLLLLLLLLLLLLLLLLLLLLLLLVLLLLLLLLLVMLLLVLLLLLVVLLLLLLLLLLLLLLMLLLVLLLLLLLLLLLLLLLFLLLLLLLLLIIIMVLLLLWVV	I	1.51724
38	KKKMKKKKTTYYYYYLLMYKSYYYYYKYYYAYMHRHKSYHFYLFFNFFDFIHVLFLFLKKKKKKTKLKKKQKKKKKKKQKQQQVKKIKRIKKKKKRKKKKKKQKKKKKKKQKKKKKRKKKKKQQSKEKQGKQEQFQKQQQQSRAKKAERQEELKRQRQKQRQQQQIALQQARSSQSERQQQQQKQQHFKQNWRKKYII	K	3.13453
39	FFFFFFFFVVFFFFFVVYFVIFFFFFFFFFLFLFIFFVFLLFVIIVLVVVILVVLFLVMLLVVVVVIVVLPVVVVIVVLVLLPVVLVVLIVVVVVLVVVVVVPVVVVVVVPVVVVVLPLVVLLLLLPLPVPPPPVPVPPPVLPPLPPPPPPPPPPPLPPPVPPPPLPPPPPPVIPVVPPPPPPVPPVLIPLPVVVIVL	F	2.18332
40	RRRRRRRRQQLLVSSGGRSHCCSSCSRCSCVSVRIRVNCNNSVKKTVSNGDNSNSNHNQQKQQQQQGQRQQQQQQQQQQQQQRSQQNQQRQQQQQQQQQQQQQQQQQQQQQQQQQQQKQSQQQQQKEQENCQEKAQQQQQGNEKQQQEHQEEHQRRQRQQNKKQQKQQQQQLHSQHTRQQQQQNQQISLQSQNNNRSK	R	2.79274
41	GGGGGGGGGGRRGFFGGRFGGFFFEFGTFFGFGFSSGGTGGSDGGAGGGGGGGGGGGGKKKKKKGKGKKKHKKKKKKKHKHHRGKKGKKGKKKKKKKKKKKKHKKKKKKKHKKKKKKHKRKKHHRKRKRGRHRRGHKHHHGGKRKRRRNHRRHHRHKRHRGRHHHKKRHHRCKKHKKHHHHHHKHRAGRQKHKKKKGK	G	2.48321
42	YYYYYYYYIIVVYVVFFYVYIVVVIVYIVVFVFIVVYFIIVVALIIHYYIILIVVVVLVIVVVVIVAVVIVVVVVVVVVVVVVYIIYVVIVVVVVVVVVVVVVVVVVVVVVVVVVVVVIVVIVVVVVIVYIVVVIVIVVVIYVVIVVVVVVVVVVVVVVVYVVVVVVLVVVVVIVVVVVVVVVVVVLVVVVVVVVLIV	Y	1.50911
43	KKKRKKRKQQRRERRTTRTLLHRRDYKEYHQREHKHKKDKQTREEQSDRHECEYEREQEEEEEEQECEEEEEEEEEEEEEEEEREELEEEEEEEEEEEEEEEEEEEEEEEEEEEEEEEEQEEEEEEEEELEEEEEEEEEECREEEEEEEEEEEEEEEEEEIEEEEEEEEEEEEEEEEEEEEEEEEEQETEEEEEEEEE	K	1.81296
44	KKKAKKKKAAPPPPIHHRIPPIIIDDKDDVPIPLPLKPDPPMPPPSPHHPPNAHPHPPPPPPPPAPPPPPPPPPPPPPPPPPPHPPYPPQPPPPPPPPPPPPPPPPPPPPPPPPPPPPPPPPPPPPPPPYPPPPPPPPPPPHPPPPPPPPPPPPPPPPPPRKPPPPPPPPPPPPPPPPPPPPPPPPPPSPPPPPPPPP	K	1.5403
45	GHHGHHGHTT--S--SSD-SS-----H---S-S-S-HS-YFSSLL-SSSSTSTSSSTGWWWWWWTWSWWWWWWWWWWWWWWWWSWWSWWSWWWWWWWWWWWWWWWWWWWWWWWWWWWWWWWWWWWWWWWSWWWWSWWWWWSSWWWWWWWWWWWWWWWWWWSWWWWWWWWWWWWWWWWWWWWWWWWWEA-WWWWWWWSW	G	1.53309
46	RKKNKKKKNQGGSGGNNRGNSGGGGGEGGGNGNNTSGNGRHEGHHGNTSSSTNGSEGNNNNNNNQNNNNNNNNNNNNNNNNNNSNNNNNNNNNNNNNNNNNNNNNNNNNNNNNNNNNNNNNNNNNNNNNSNNNNNNNNNNTENNNNNNNNNNNNNNNNNNTNNNNNNNNNNNNNNNNNNNNNNNNNNQGNNNNNNNSN	R	1.5753
47	SSSSSSSSSSSSSSSSSSSSSSSSCSSCSSSSSSSSSSCSSCSSSSSSSSSSSSSRSSSSSSSSSSSSSSSSSSSSSSSSSSSSSSSSSSSSSSSSSSSSSSSSSSSSSSSSSSSSSSSSSSSSSSSSSSSSSSSSSSSSSSSSSSSSSSSSSSSSSSSSSSSSSSSSSSSSSSSSSSSSSSSSSSSSSSSSSSSSSS	S	0.188224
48	IIIIIIIIYYVVILLFFVLFFLLLMLIILLILILVLIFMIILVLLVSFFFIFIFLFLFVVVVVVYVFVVVVVVVVVVVVVVVVFVVFVVLVVVVVVVVVVVVVVVVVVVVVVVVVVVVVVVVVVVVVVVFVVVVLVVVVVFFVVVVVVVVVVVVVVVVVVFVVVVVVVVVVVIVVIVVVVVVVVVVFIIVVVVVVVLV	I	1.61599
49	LLLLLLLLLLIVIQQFFLHLFCQQECLECCVQICLCLFEIVKIIIVVFLLHFLMTMTLRRRRRRLRLRRRRRRRRRRRRRRRRLRRIRRWRRRRRRRRRRRRRRRRRRRRRRRRRRRRRRRRRRRRRRRFRRRRVRRRRRFIRRRRRRRRRRRRRRRRRRFRRRRRRRRRRRKRRKRRRRRRRRRRITVRRRRRRRMR	L	2.12447
50	VMAVVVVVIVLLVLLVVVLLVLLLLLMLLLILILLLVLLIVLLVIVLVALIVVLLLLIVVVVVVIVLVVVVVVVVVVVVVVVVAVVLVVIVVVVVVVVVVVVVVVVVVVVVVVVVVVVVVVVVVVVVVVLVVVVVVVVVVLAVVVVVVVVVVVVVIVVVVIVVVVVVVVVVVVVVVVVVVVVVVVVILLIVVVVVVIV	V	1.22155
51	HHHHHHHHTTEETLLIIHHVVGLLKGHKGGTLTEVGQVKTTNITTTTVVATVTVTSTTTTTTTTTTVTTTTTTTTTTTTTTTTVTTVTTTTTTTTTTTTTTTTTTTTTTTTTTTTTTTTTTTTTTTTTTVTTTTTTTTTTMITTTTTTTTTTTTTTTTTTVTTTTTTTTTTTTTTTTTTTTTTTTTVTETTTTTTTTT	H	1.60066
52	YYYYFFFFFFYYFHHLLFYLLYHHYYYYYYFYFYLYFLYFFYLLLFFFLLFLFLFLFFFFFFFFFFLFFFFFFFFFFFFFFFFLFFLFFFFFFFFFFFFFFFFFFFFFFFFFFFFFFFFFFFFFFFFFFLFFFFLFFFFFLVFFFFFFFFFFFFFFFFFFLFFFFFFFFFFFFFFFFFFFFFFLFFMFLFFFFLLLIF	Y	1.26251
53	TTTTSSSSMMLLMNNTASLSSLNNSLTSLLMNMLSLVSSRLFSMMQMSSSMSMSMSMTNNNSNNMNSNNNNNNNNNNNNNNNNSNNSNNMNNNNNNNNNNNNNNNNNNNNNNNNNNNNNNNNNNNNNNNSNNNNMNNNNNSSNSNNNNNNNNNNNNNNNNSNNNNNNNNNNSNNNNNNNNNNNTNNTMENNNSSSSMN	T	1.81304
54	IIVIIMIVVVIIVIIIIIIIIIIIIIIIIILIVIIIVLILIIVVVLVIIIIIIMIVIIIIIIIIVIIIIIIIIIIIIIIIIIIIIIIIIIIIIIIIIIIIIIIIIIIIIIIIIIIIIIIIIIIILIIIIIIIIIVIIIIIIIIIIIIIIIIIIIIIIIIIIIIIIIIIIIIVIIIIIIIIIIIIIIMVMIIIIIIILI	I	0.736289
55	PPPPPPPPPPPSPPPKKPPKKPPPPPPPPPPPPPKPPKPPPPKPPPPRENPIPKHKHAPPPPPPPPKPPPPPPPPPPPPPPPPEPPKPPPPPPPPPPPPPPPPPPPPPPPPPPPPPPPPPPPPPPPPPPKPPPPPPPPPPREPPPPPPPPPPPPPPPPPPRPPPPPPPPPPPPPPPPPPPPPPPPPRHDPPPPPPPLT	P	1.00674
56	RRRRRRRREDDETDDYDREEEEDDDERNEEEDEEEEQEDMNNEAEDEQKNEEEDEEEERRRRRRERERRRRRRRRRRRRRRRRKRRERRDRRRRRRRRRRRRRRRRRRRRRRRRRRRKRRRRRRRRRRRERRRRARRRRRTVRRRRRRRRRRRRRRRRRRGRRRRRRRRRRRRPRRRRRRRRRHRRERRRKRRKKREK	R	1.78736
57	EEEKEEEEHHYYDYYIIEYIIYYYFYEYYYEYEYAYEVFDSYKKSCTLKDVSGIQVEEEEEEEEHETEEEEEEEEEEEDEDDDKEEIEEWEEEEEEEEEEEEEEEEEEEEEEEEEEEEESEEDDEEEEDIEDEDADEEDEAIEEEEEEDDEEEDDDEDDDIDDDDEEDDDEDHEDHEDDDDDDDDDDNIDEDEDDEDE	E	2.43648
58	SSNSNNNNCCLLNLLYYNLYWLLLLLSLLLALALDLTYLMALYAAIAYYYCCYYYYCYAAAAAACAYAAAAAAAAAAAAAAAAHAAYAACAAAAAAAAAAAAAAAAAAAAAAAAAAAAAAAAAAAAAAAYAAAAYAAAAAHYAAAAAAAAAAAAAAAAAAYAAAAAAAAAAAAAAAAAAAAAAAAALIAAAAAAAADA	S	1.80574
59	TTTTTTTTIIYYTYYYYTYIIYYYYYTYYYIYIYTYTTYVVYAAVIVLVVIMAIVSVIAAAAAAIASAAAAAAAAAAAAAAAAVAALAATAAAAAAAAAAAAAAAAAAAAAAAAAAAAAAAAAAAAAAAIAAAAVAAAAALVAAAAAAAAAAAAAAAAAAIAAAAAAAAAAAAAAAAAAAAAAAAAVEAAAAAAAAAA	T	1.74905
60	EAAAAAGAEGSSRSSSSALKKSSSSSVSSSESESRSDWSQAFWFLPDSRGEKHKDGTDDEEEEEEECEEEEEEEEEEEEEEEEKEENEEDEEEEEEEEEEEEEEEEEEEEEEEEEEEEEQEEEEEEEEDEEEEEDEEEEEMGEEEEEEEEEEEEEDDEEEDEEEEHEDEEEETQETQEEEEEEQEERANDAELAAINL	E	2.49237
61	VVVVVVVVSYLLEAAKKVLRRLAAILVVLLTATLKLLKVAIIKAAGVKKKIRVKPKPFRRRRRRFRKRRRRRRRRRRRRRRRRRRRKRRIRRRRRRRRRRRRRRRRRRRRRRRRRRRRRRRRRRRRRRRRRRRRLRRRRRKKRRRRRRRRRRRRRRRRRRKRRRRRRRRRRRHRRHRRRRRRRRRRKPRRRRRKKRRR	V	1.98679
62	LLLLLLLLLLLLLLLLLLLLLLLLLLLLLLLLLLLLLLLLLLFLLVFLLLLLLWLLLVLLLLLLLLLLLLLLLLLLLLLLLLLLLLLLLLLLLLLLLLLLLLLLLLLLLLLLLLLLLLLLLLLLLLLLLLLLLLVLLLLLLLLLLLLLLLLLLLLLLLLLLLLLLLLLLLLLLLLLLLLLLLLLLLLLLLLLLLLLLL	L	0.240126
63	RRRKRRRRKTFFKFFLLRFLKFFFFFRFFFHFYFLFRSFTKFTFFRHFLLLFSMTLRFRRRRRRTRLRRRRRRRRRRRRRRRRLRRLRRMRRRRRRRRRRRRRRRRRRRRRRRRRRRRRQRRRRRRRRRFRRRRPRRRRRLVRRRRRRRRRRRRRRRRRRFRRRRKRRRRRRRQRRRRRRRRRRRRKPIRRRRRRRVK	R	1.80319
64	LLLLHHLHTRPPAPPDDLPASPPPPPLPPPDPDPSPIKPNDPAEEESATENNENEARELILIIIVIAIIILIIIIIIILILLITIINILCIIIIILIIIIIILIIIIIIILIIIIILIIQIILLLMLILNLLLLCLVLLLKALLILLLLLLLLLLLLLLVSLLLLQLLLLLLSHLSQLLLLLLHLLEDKLELEQQHSQ	L	2.96256
65	MMMMMMMMLLLLLLLMMMLMLLLLLLMLLLLLLLMLTLLLLILLLILMMILMLLLLLILLLLLLILLLLLLLLLLLLLLLLLLMLLLLLLLLLLLLLLLLLLLLLLLLLLLLLLLLMLLLLLLLLLLLLMLLLLALLLLLMIMLLLLLLLLLLLLLLLLLILLLLLLILLLMLLLLLLLLLLLLLLILLLLLLLLLSF	M	0.954473
66	AAAAAAAAKKTTSSSGGATRNSTSTTATTTVSETSSANTTTNNSSLTEKGDKSSFRFQAAAAAAKAEAAAAAAAAAAAAAAAAKAAKAASAAAAAAAAAAAAAAAAAAAAAAAAAAAAAAAAAAAAAAAKAAAADAAAAAENAAAAAAAAAAAAAAAAAAEAAAAAAAAAAAAAAAAAAAAAAAAANLFAAAAAAASA	A	1.84317
67	SSDNDDNDHPTTETTQQDEQQTTTNTDNTTPTPTETRENLSEEEETSEQQDENEREKQQQQQQQPQQQQQQQQQQQQQQQQQQQQQRQQIQQQQQQQQQQQQQQQQQQQQQQQQQQQQQEQQQQQQQQQQQQQQRQQQQQQKQQQQQQQQQQQQQQQQQQEQQQQQQQQQQQQQQQEQQQQQQQQQPKNQQQASSSPQ	S	1.97025
68	YYHHQHHHTAKKEEEQQYKHHKEEQKNQKKEEEKEKNQQEEEEVIEEQKEKQKRQKEGNNGNSSASCSSNNSSSSSSSNSNNHPNNQSGKSSSSSGSSSSSSNSSSSSSSNSSSSSNNNTSNNNNNNNNHNNNNCNSNNNQQNNNNNNNNNNNNNNNNNNHNNNNQNNNNNCNNNNRNNNNNNQNNLDQNRNQEEEEQ	Y	2.85302
69	PPSSSSSSEELLDIIDDSLDDLIIQLSQLLDIDLNLSDQEEQDEERDEEDEDEDHDHDNNNNNNENDNNNNNNNNNNNNNNNNENNDNNSNNNNNNNNNNNNNNNNNNNNNNNNNNNNNRNNNNNNNNNDNNNSENNNNNDDNNNNNNNNNNNNNNNNNNDNNNNGNNNNNSGDHGGNNNNNNGNNKHNNGNGGGGSG	P	2.3014
70	DDDDDDDDKKKQRQQRRDQKNQQQCQDCQQRQRQQQDICKKLCKKVKKKKKKKCSRKANNNNNNKNKNNNQNNNNNNNQNQQQKNNKNNWNNNNNNNNNNNNQNNNNNNNQNNNNNNQNNNNQQQNQNHKQQQHLQNQQQKRNQNQQQQQQQQQQHQQQQKQQQQDQQQQQQDSQDDQQQQQQHQQLGDHDQSSSSLN	D	2.61108
71	PPPPPPPPQQQQSQQDDPKDDQEQHQPDQQSESQLQPHDGGQQSSDEEDAKEEHDTDDQQQQQQRQDQQQQQQQQQQQQQQQQDQQDQQKQQQQQQQQQQQQQQQQQQQQQQQQQQQQQQQQQQQQQQQEQQQQGQQQQQDYQQQQQQQQQQQQQQQQQQDQQQQSQQQQQQPQQPHQQQQQQHQQRDVQLQPNNQAA	P	2.01722
72	RRRRRRRRCCQQLQQKKRQTKQQQSQRLQQVQVQKQRRSLLNKITSIKKKRKYRSKSFQQQQQQCQKQQQQQQQQQQQQQQQQKQQEQQVQQQQQQQQQQQQQQQQQQQQQQQQQQQQQQQQQQQQQQQQQQQQFQQQQQNRQQQQQQQQQQQQQQQQQQKQQQQTQQQQQQSLQSVQQQQQQAQQKSRQNQTAAQVT	R	2.03691
73	LLLLLLLLLLLLLLLLLLLLLLLLLLLLLLLLLLLLLLLLLLLLLLFLLLLLLLFLFLLLLLLLLLLLLLLLLLLLLLLLLLLLLLLLLLLLLLLLLLLLLLLLLLLLLLLLLLLLLLLLLLLLLLLLLLLLLLLLLLLLLFLLLLLLLLLLLLLLLLLLLLLLLLLLLLLLLLLLLLLLLLLLLLLFLLLLLLLLLL	L	0.169994
74	VVVVVVVVLLAAKAARRVAISAAAAAVAAAKAKARAVRAQQARQQKTISICIGTGRGIRRRRRRLRTRRRRRRRRRRRRRRRRSRRGRRVRRRRRRRRRRRRRRRRRRRRRRRRRRRRRRRRRRRRRRRSRRRRRRRRRRSVRRRRRRRRRRRRRRRRRRRRRRRRRRRRRRRQRRKRRRRRRRRRSSKRHRTRRRSR	V	1.97503
75	FFFFYYYYSSSSSSSQQYSKKSSSESFESSSSSSESFNENQSKSSTSRRKLSSSKRNSDDDDDDSDKDDDDDDDDDDDDDDDDRDDIDEEDDDDDDDDDDDDDDDDDDDDDDDDDDDEDDDDDDDDDDDTDDDDTEDDDDKRDDDDDDDDDDDDDDDDDEKDDDEQDDDDDDNNENDDDDDDDTDDQSSDKDQAAADS	F	2.33332
76	MMMMMMMMLLIIMIIHLMILLIIIIIMIIIMIMILIMLIECILLLYMLLLHLQLLLLELLLLLLLLLLLLLLLLLLLLLLLLLLLLLLLLLLLLLLLLLLLLLLLLLLLLLLLLLLLLLLLLLLLLLLLLLLLLVLLLLLLLLLLLLLLLLLLLLLLLLLLLLLLLLLLLLLLLLLLLLLLLLLLLFLALLLLLLLML	M	1.25489
77	GGGGGGGGGGGGHGGNNGGNNGGGGGGGGGKAKGNGGNGGDNKRRGKNNNGNGHGNGGGGGGGGGGNGGGGGGGGGGGGGGGGNGGYGGTGGGGGGGGGGGGGGGGGGGGGGGGGGGGGGGGGGGGGGGSGGGGDGGGGGSDGGGGGGGGGGGGGGGGGGNGGGGGGGGGGGGGGGGGGGGGGGGGKGKGGGGGGGFG	G	1.1066
78	VVMVVVVVVVIIVIIIIIIIIIIIIIVIIIVIVIIIVIIIVEIIVIVIIIVIVIVIVVIIIIIIVIIIIIIIIIIIIIIIIIIIIIIIIVIIIIIIIIIIIIIIIIIIIIIIIIIIIIIIIIIIIIIIIIIIIIVIIIIIIIIIIIIIIIIIIIIIIIIIIIIIIVIIIIIIIIIIIIIIIIIIIIVVIIIIIIIIVV	V	0.702774
79	TTETKKKKDDTTDSTDDKADDTSTITKITTDTDTDTTDIDDIDDDIDDDDDNDDDADDLLLLLLDLDLLLLLLLLLLLLLLLLDLLDLLDLLLLLLLLLLLLLLLLLLLLLLLLLLLLLLLLLLLLLLLDLLLLDLLLLLDDLLLLLLLLLLLLLLLLLLDLLLLLLLLLLLLLLLLLLLLLLLLLDDTLLLLLLLNL	T	1.69159
80	SSSSSSSSCFEEYEEFFSEYYEEKKESKEEYEYEYESFKSCSYSSACFYYRYAYGYGFSSSSSSFSYSSSSSSSSSSSSSSSSFSSYSSKSSSSSSSSSSSSSSSSSSSSSSSSSSSSSASSSSSSSSSYSSSSKSSSSSFYSSSSSSSSSSSSSSSSSSFSSSSASSSSSSSSSSSSSSSSSSSSWRSSTSSSSSYA	S	1.73207
81	LLLLLLLLLILLIILLLLILFLLLMLLMLLILILMLLFIFVLLFFIIFFFFFIFMLIVVVVVVVIVIVVVVVVIVVVVVVVVVLVVFVVLVVVVVVVVVVVVVVVVVVVVVVVVVVVVVVVVVVVVVVVFVVVVIVVVVVIFVVVVVVVVVVVVVVVVVIFVVVVVVVVVVVVVVVVVVVVVVVVLIVVVVVVVVVVV	L	1.54791
82	QQQQQQQQVVTTFATIIQTKKTTTSTQITIFTFTISQITFFEIGAQIIIIKIWISIFKQQQQQQMQIQQQQQQQQQQQQQQQQIQQKQQFQQQQQQQQQQQQQQQQQQQQQQQQQQQQQQQQQQQQQQQKQQQQTQQQQQITQQQQQQQQQQQQQQQQQQEQQQQQQQQQQQQQQQQQQQQQQQQLQWKQQQQQQQMQ	Q	1.78176
83	IIIIIIIIIVCCICCVVICDDCCCCCICCCVCQCVCIVCIICMVVILVVVVVYLVIVVIIIIIIIIVIIIIIIIIIIIIIIIIVIIVIIIIIIIIIIIIIIIIIIIIIIIIIIIIIIIIVIIIIIIIIIDIIIIIIIIIIVVIIIIIIIIIIIIIIIIIIDIIIIIIIIIIILVILVIIIIIIVIKIFIIVIVLLVSI	I	1.58355
84	DGDDDDDDEEGGGGGDDDDDDGGGNGDHGGGGDGDGGDHGGGDGGNDDDDDDNNDDDNEEEEEEEEDEEEEEEEEEEEEEEEEDEEDEEREEEEEEEEEEEEEEEEEEEEEEEEEEEEEEEEEEEEEEEDEEEEKEEEEEDDEEEEEEEEEEEEEEEEEEDEEEEEEEEEEEEEEEEEEEEEEDEYEEIEEEEEEEGE	D	1.56054
85	AAAAAATASDKDEDDLLAKFLEDDEEAEEEEDEEKERFDKEEGDDGDFFLESEQDGGEGGGAGGGGLGGGGGGGGGGGGGGGGFGGGGGSGGGGGGGGGGGGGGGGGGGGGGGGGGGGGGGVGGGGGGGFGGDGEGGGGGLFGGGGGGGGGGGGGGGGGGFGGGGGGGGGGGNNGNGGGGGGGGGKDDSGNGGGGGEG	A	2.09238
86	EEGEEEEENNYSEYYNKEYTQDYYHDEYDDQYQNEDEKYEFYKKKQDTTIQFKKSETKEEEKEETEVEEEEEEEEEEEEEEEEIEEKEEKEEEEEEEEEEEEEEEEEEEEEEEEEEEEEQHPEEEEEEETEEMEIEEEHEVIEEEEEEEEEEEEEEEEEETEEEEDEEEEEENNENEEEEEEEDETKQLEEEDDDDTD	E	2.25127
87	APVPVVERTTKEEKQVEPVITKKKVKAVKKEKEKIKATVEKSSRRSEVVVLPLSESEVGGGSGGTGIGGGGGGGGGGGGGGGSKGGPGGKGGGGGGGGGGGGGGGGGGGGGGGGGGGGGCLTGGGGGGGLGGDGEGGGNGVKGGGGGGGGGGGGGGGGGGIGGGGQGGGGGGVDGVQGGGGGGQGPVEPGTGQTTQSQ	A	2.58832
88	PPPPPPPPIIYDVYYIIPYRAYYYHYPHYYIYIYLYAIHVIYIVVLIYYHIVIFYIYVAAAGAAIASAAAAAAAAAAAAAAAAVAAIAAEAAAAAAAAAAAAAAAAAAAAPAAAAAIAALDCAAPAAAVHAAPAIAAASAFVIPAAPAAAAAAAAAAAAASPAAAIPAASPAILAIVAAAAAAIAIIVVAIAVVVVII	P	2.46597
89	IIVIIIIIRANKSDDLLIDLGDDDEDIEDDPDPDIDVSERRNLVKIPILLDYSQMHFDIIIRIIAILIIIIIIIIIIIIIIIIYIIYIIIIIIIIIIIIIIIIIIIIIIIIIIIIIIIIIPAIIIIIIITIIMIEIIIWILIIIIIIIIIIIIIIIIIIILIIIIIIIIIIIDVIDIIIIIIIIIPNRSISIIIIISI	I	2.18274
90	KKKKKKEKLLLYILLLLTLMVLLLMLEMLLLLLLLIELMVIILLLRIKQECLCLDINLNNNWNNLNENNNNNNNNNNNNNNNNVNNLNNVNNNNNNNNNNNNNNNNNNNNNNNNNNNNNMNLNNNNNNNANNLNINNNSNGLNNNNNNNNNNNNNNNNNNKNNNNSNNNNNNLNNLTNNNNNNSNIILGNLNSSSSVS	K	2.33965
