# Supplementary material for: Bacterial death and TRADD-N domains help define novel apoptosis and immunity mechanisms shared by prokaryotes and metazoans
Source: eLife. 2021 Jun 1;10:e70394. doi: 10.7554/eLife.70394 (PMC8195603; doi:10.7554/eLife.70394)
Supplement: Supplementary file 5. [file elife-70394-supp5.csv]

Organism	Polydomain score
Rhodanobacter sp. B05	1.47496094425284
Rivularia sp. PCC 7116	2.65613879439872
Rhodovulum sulfidophilum	3.25235414382345
Candidatus Poribacteria bacterium	3.65613879439872
Tachysurus fulvidraco	3.81755338972317
Geodermatophilus saharensis	4.25235414382345
Nitrosomonas sp.	4.42306611105193
Solimicrobium silvestre	5.43353199396933
Chloroflexaceae bacterium	5.43353199396933
Nodosilinea sp. LEGE 07088	5.43353199396933
Arthrospira sp. O9.13F	5.8373166445446
endosymbiont of Tevnia jerichonana	5.97806688928608
Ophiophagus hannah	5.99873123986905
Blastochloris sp.	6.05970906588105
Bradyrhizobium sp. 83012	6.65613879439872
Mesorhizobium sp.	6.65613879439872
Nostoc carneum NIES-2107	7.57428223871081
Leptolyngbya sp. SIO3F4	7.57428223871081
Nephila clavipes	7.72420915487225
Euroglyphus maynei	7.7598697561947
Galendromus occidentalis	7.7598697561947
Priapulus caudatus	7.7598697561947
Sarcoptes scabiei	7.7598697561947
Tetranychus urticae	7.7598697561947
Varroa destructor	7.7598697561947
Varroa jacobsoni	7.7598697561947
Helobdella robusta	7.7598697561947
Falco cherrug	7.7598697561947
Limosa lapponica baueri	7.7598697561947
Macaca nemestrina	7.7598697561947
Patagioenas fasciata monilis	7.7598697561947
Daphnia magna	7.7598697561947
Eurytemora affinis	7.7598697561947
Hyalella azteca	7.7598697561947
Acyrthosiphon pisum	7.7598697561947
Aedes albopictus	7.7598697561947
Amyelois transitella	7.7598697561947
Anoplophora glabripennis	7.7598697561947
Apis cerana	7.7598697561947
Apis cerana cerana	7.7598697561947
Apis mellifera	7.7598697561947
Athalia rosae	7.7598697561947
Atta cephalotes	7.7598697561947
Bactrocera latifrons	7.7598697561947
Bactrocera oleae	7.7598697561947
Bemisia tabaci	7.7598697561947
Bicyclus anynana	7.7598697561947
Blattella germanica	7.7598697561947
Bombus impatiens	7.7598697561947
Bombus terrestris	7.7598697561947
Bombyx mori	7.7598697561947
Cephus cinctus	7.7598697561947
Ceratina calcarata	7.7598697561947
Ceratitis capitata	7.7598697561947
Ceratosolen solmsi marchali	7.7598697561947
Cimex lectularius	7.7598697561947
Clunio marinus	7.7598697561947
Copidosoma floridanum	7.7598697561947
Cryptotermes secundus	7.7598697561947
Culex quinquefasciatus	7.7598697561947
Danaus plexippus plexippus	7.7598697561947
Dendroctonus ponderosae	7.7598697561947
Diachasma alloeum	7.7598697561947
Diaphorina citri	7.7598697561947
Dinoponera quadriceps	7.7598697561947
Diuraphis noxia	7.7598697561947
Fopius arisanus	7.7598697561947
Halyomorpha halys	7.7598697561947
Heliothis virescens	7.7598697561947
Leptinotarsa decemlineata	7.7598697561947
Linepithema humile	7.7598697561947
Megachile rotundata	7.7598697561947
Melanaphis sacchari	7.7598697561947
Melipona quadrifasciata	7.7598697561947
Microplitis demolitor	7.7598697561947
Monomorium pharaonis	7.7598697561947
Musca domestica	7.7598697561947
Myzus persicae	7.7598697561947
Nasonia vitripennis	7.7598697561947
Neodiprion lecontei	7.7598697561947
Nicrophorus vespilloides	7.7598697561947
Nilaparvata lugens	7.7598697561947
Onthophagus taurus	7.7598697561947
Operophtera brumata	7.7598697561947
Orussus abietinus	7.7598697561947
Oryctes borbonicus	7.7598697561947
Pediculus humanus corporis	7.7598697561947
Pieris rapae	7.7598697561947
Plutella xylostella	7.7598697561947
Pogonomyrmex barbatus	7.7598697561947
Polistes canadensis	7.7598697561947
Polistes dominula	7.7598697561947
Pseudomyrmex gracilis	7.7598697561947
Rhagoletis zephyria	7.7598697561947
Sipha flava	7.7598697561947
Spodoptera litura	7.7598697561947
Stomoxys calcitrans	7.7598697561947
Temnothorax curvispinosus	7.7598697561947
Tribolium castaneum	7.7598697561947
Trichogramma pretiosum	7.7598697561947
Trichomalopsis sarcophagae	7.7598697561947
Vollenhovia emeryi	7.7598697561947
Wasmannia auropunctata	7.7598697561947
Zeugodacus cucurbitae	7.7598697561947
Zootermopsis nevadensis	7.7598697561947
Toxocara canis	7.7598697561947
Diuraphis noxia	7.7598697561947
Toxocara canis	7.7598697561947
Temnothorax curvispinosus	7.7598697561947
Oryctes borbonicus	7.7598697561947
Amyelois transitella	7.7598697561947
Gemmata sp. SH-PL17	7.91236625656014
Trichoplax adhaerens	7.94606930880433
Halomicronema hongdechloris	8.15924473943197
Teredinibacter turnerae	8.15924473943197
Nonlabens sp. Hel1_33_55	8.23042103310953
Tolypothrix tenuis PCC 7101	8.38185153986136
Chamaesiphon polymorphus	8.64467156660221
Spirulina major	8.64467156660221
Spirulina subsalsa	8.64467156660221
Desulfobacteraceae bacterium IS3	8.64467156660221
Roseiflexaceae bacterium	8.78542181134369
Ardenticatenaceae bacterium	8.82606379584103
Nodosilinea nodulosa	9.22984844641631
Arthrospira platensis str. Paraca	9.41102629656219
Calothrix rhizosoleniae	9.51914068451835
Calothrix sp. NIES-2100	9.51914068451835
Fischerella sp. NIES-3754	9.51914068451835
Nitrospira sp. ND1	9.78061811567001
Calothrix parasitica	9.79151295493148
Cyanothece	9.79151295493148
Microcystis aeruginosa PCC 7941	9.79151295493148
Xenococcus sp. PCC 7305	9.79151295493148
Microcystis phage MaMV-DC	9.79151295493148
Anaerolineae bacterium SG8_19	10.5789709338763
Ensifer sp. 1H6	10.7741689626401
Kaistia soli DSM 19436	10.7741689626401
Rhodobacter capsulatus YW1	10.7741689626401
Sinorhizobium meliloti	10.7741689626401
Achromobacter insolitus	10.7741689626401
Burkholderiales bacterium GWA2_64_37	10.7741689626401
Herbaspirillum sp. XFZ15 10_5	10.7741689626401
Paraburkholderia hospita	10.7741689626401
Calothrix	10.7854218113437
Acaryochloris marina	10.941541013261
Apis florea	11.5328882164357
Ooceraea biroi	11.5328882164357
Planktothrix tepida	11.6334187178986
Planktothrix rubescens	11.8148109471375
Microcystis aeruginosa CACIAM 03	12.3652226069491
Microcystis aeruginosa DIANCHI905	12.3652226069491
Microcystis aeruginosa NIES-44	12.3652226069491
Microcystis aeruginosa NIES-87	12.3652226069491
Microcystis aeruginosa NIES-98	12.3652226069491
Microcystis aeruginosa TAIHU98	12.3652226069491
Microcystis sp. T1-4	12.3652226069491
Arthrospira sp. PCC 8005	12.4062226008885
Phormidium willei	12.4062226008885
Oscillatoria acuminata	12.5078878358148
Oscillatoria sp. PCC 10802	12.5078878358148
Pseudanabaena sp. SR411	12.5078878358148
Roseofilum reptotaenium AO1-A	12.5078878358148
Stanieria cyanosphaera	12.5078878358148
Cyanothece sp. PCC 7424	12.5858903478161
Nostoc sp. PCC 7524	12.5858903478161
Planktothricoides sp. SR001	12.5858903478161
Calothrix sp. PCC 7507	12.7302802571512
Hydrocoleum sp. CS-953	12.7302802571512
Thiotrichaceae bacterium IS1	12.7302802571512
Caldora sp. SIO3E6	12.7802601062279
Calothrix membranacea	12.7802601062279
Calothrix sp. FACHB-156	12.7802601062279
Moorea sp. SIO3C2	12.7802601062279
Moorea sp. SIO4A1	12.7802601062279
Moorea sp. SIO4A5	12.7802601062279
Moorea sp. SIOASIH	12.7802601062279
Nostoc linckia FACHB-104	12.7802601062279
Nostoc sp. CENA67	12.7802601062279
Nostoc sp. FACHB-145	12.7802601062279
Nostoc sp. FACHB-190	12.7802601062279
Nostoc sp. UIC 10630	12.7802601062279
Nostocaceae	12.7802601062279
Alkalinema sp. CACIAM 70d	12.8582626182292
Anabaena cylindrica	12.8582626182292
Anabaena sp. CRKS33	12.8582626182292
Calothrix brevissima	12.8582626182292
Calothrix sp. PCC 7103	12.8582626182292
Chroococcidiopsis cubana CCALA 043	12.8582626182292
Coleofasciculus chthonoplastes	12.8582626182292
Coleofasciculus chthonoplastes PCC 7420	12.8582626182292
Fischerella sp. PCC 9431	12.8582626182292
Kamptonema formosum	12.8582626182292
Mastigocoleus testarum	12.8582626182292
Moorea bouillonii	12.8582626182292
Moorea bouillonii PNG	12.8582626182292
Nostoc flagelliforme	12.8582626182292
Nostoc flagelliforme CCNUN1	12.8582626182292
Nostoc linckia z3	12.8582626182292
Nostoc piscinale	12.8582626182292
Nostoc sp. MBR 210	12.8582626182292
Nostoc sp. RF31Y	12.8582626182292
Phormidium ambiguum IAM M-71	12.8582626182292
Tolypothrix sp. NIES-4075	12.8582626182292
Athene cunicularia	13.3253480299219
Calypte anna	13.3253480299219
Corvus cornix cornix	13.3253480299219
Dromaius novaehollandiae	13.3253480299219
Erythrura gouldiae	13.3253480299219
Geospiza fortis	13.3253480299219
Serinus canaria	13.3253480299219
Terrapene mexicana triunguis	13.3253480299219
Urocitellus parryii	13.3253480299219
Ursus arctos horribilis	13.3253480299219
Desulfobacterales bacterium PC51MH44	13.356457329063
Mesorhizobium qingshengii	13.4966349871112
Sinorhizobium sp. CCBAU 05631	13.4966349871112
Candidatus Gracilibacteria bacterium	14.1120386013965
Bacteroidetes bacterium HGW-Bacteroidetes-6	14.2135775229461
Schistosoma mansoni	15.3095602133252
Anabarilius grahami	15.3095602133252
Rana catesbeiana	15.484078911067
Aedes aegypti	15.5197395123894
Atta colombica	15.5197395123894
Camponotus floridanus	15.5197395123894
Cyphomyrmex costatus	15.5197395123894
Dufourea novaeangliae	15.5197395123894
Eufriesea mexicana	15.5197395123894
Folsomia candida	15.5197395123894
Harpegnathos saltator	15.5197395123894
Helicoverpa armigera	15.5197395123894
Lucilia cuprina	15.5197395123894
Trichuris suis	15.5197395123894
Cyanosarcina burmensis	16.086765574075
Mesorhizobium sp. WSM3864	16.2692244910081
Herpetosiphon llansteffanensis	16.6178899231686
Calothrix sp. NIES-4071	16.7629161139366
Moorea producens JHB	18.2917946121985
Mastigocoleus testarum BC008	18.3905952110135
Mesorhizobium loti	18.7884863590034
Mesorhizobium sp. WSM3882	18.7884863590034
Mesorhizobium temperatum	18.7884863590034
Prosthecomicrobium hirschii	18.7884863590034
Rhizobium sp. Leaf311	18.7884863590034
Sphingomonadaceae	18.7884863590034
Sphingomonas sp. BHC-A	18.7884863590034
Zavarzinella formosa	19.0755127253714
Acromyrmex echinatior	19.2927579726304
Habropoda laboriosa	19.2927579726304
Moorea sp. SIO3G5	20.051026663836
Deltaproteobacteria bacterium	20.1917769085775
Crocosphaera watsonii	20.6585769428701
Apteryx rowi	21.0495571847941
Anser cygnoides domesticus	21.0852177861166
Aquila chrysaetos canadensis	21.0852177861166
Camelus bactrianus	21.0852177861166
Cathartes aura	21.0852177861166
Chlorocebus sabaeus	21.0852177861166
Equus przewalskii	21.0852177861166
Gavialis gangeticus	21.0852177861166
Microcebus murinus	21.0852177861166
Mus pahari	21.0852177861166
Nomascus leucogenys	21.0852177861166
Phoenicopterus ruber ruber	21.0852177861166
Podiceps cristatus	21.0852177861166
Rhinopithecus bieti	21.0852177861166
Saimiri boliviensis boliviensis	21.0852177861166
Tursiops truncatus	21.0852177861166
Moorea sp. SIO2I5	21.2025392514937
Calothrix sp. HK-06	21.3018522697404
Chroococcidiopsis cubana	21.4133823641278
Stegodyphus mimosarum	21.7133448639005
Canis lupus dingo	21.7133448639005
Strongylocentrotus purpuratus	21.7133448639005
Arthrospira platensis	21.8172488974507
Nostoc linckia	22.6497755731607
Pseudanabaena sp. ABRG5-3	22.7107986254314
Macrostomum lignano	23.0337693681975
Calothrix desertica PCC 7102	23.4334936863335
Microcystis panniformis FACHB-1757	24.7304452138981
Moorea sp. SIO4G2	25.5605202124558
[Scytonema hofmanni] UTEX B 1581	25.5885428753804
Nostoc linckia z1	25.7165252364584
Nostoc sp. 106C	25.7165252364584
Manacus vitellinus	26.6506960598437
Clonorchis sinensis	28.1171295144758
Echinococcus granulosus	28.1171295144758
Echinococcus multilocularis	28.1171295144758
Hymenolepis microstoma	28.1171295144758
Opisthorchis viverrini	28.1171295144758
Ciona intestinalis	28.6684368402662
Bambusicola thoracicus	28.8094269409888
Bison bison bison	28.8094269409888
Colobus angolensis palliatus	28.8094269409888
Cyanistes caeruleus	28.8094269409888
Ficedula albicollis	28.8094269409888
Lepidothrix coronata	28.8094269409888
Parus major	28.8094269409888
Centruroides sculpturatus	29.4732146200952
Parasteatoda tepidariorum	29.4732146200952
Haliaeetus leucocephalus	29.4732146200952
Mandrillus leucophaeus	29.4732146200952
Poecilia mexicana	29.4732146200952
Rhizobium leguminosarum	29.5626553216435
Chloroflexi bacterium	32.7706096940253
Chlamydotis macqueenii	34.4105658160384
Eurypyga helias	34.4105658160384
Fulmarus glacialis	34.4105658160384
Gavia stellata	34.4105658160384
Haliaeetus albicilla	34.4105658160384
Leptosomus discolor	34.4105658160384
Mesitornis unicolor	34.4105658160384
Nestor notabilis	34.4105658160384
Opisthocomus hoazin	34.4105658160384
Pelecanus crispus	34.4105658160384
Pygoscelis adeliae	34.4105658160384
Tyto alba	34.4105658160384
Biomphalaria glabrata	34.5142079750194
Acinonyx jubatus	35.0386928938224
Colinus virginianus	35.0386928938224
Falco peregrinus	35.0386928938224
Gorilla gorilla gorilla	35.0386928938224
Melopsittacus undulatus	35.0386928938224
Nothoprocta perdicaria	35.0386928938224
Physeter catodon	35.0386928938224
Rhinopithecus roxellana	35.0386928938224
Vulpes vulpes	35.0386928938224
Zonotrichia albicollis	35.0386928938224
Astatotilapia calliptera	35.0386928938224
Takifugu rubripes	35.0386928938224
Meleagris gallopavo	35.4719458599643
Moorea producens PAL-8-15-08-1	35.5080381913898
Cervus elaphus hippelaphus	36.3947779994418
Sarcophilus harrisii	37.1974237749675
Pan troglodytes	37.2330843762899
Burkholderia sp. LA-2-3-30-S1-D2	37.5769727180067
Moorea producens	38.5747878546875
Phalacrocorax carbo	42.1347749709107
Picoides pubescens	42.1347749709107
Tinamus guttatus	42.1347749709107
Anas platyrhynchos	42.1704355722331
Apaloderma vittatum	42.1704355722331
Balearica regulorum gibbericeps	42.1704355722331
Buceros rhinoceros silvestris	42.1704355722331
Merops nubicus	42.1704355722331
Pterocles gutturalis	42.1704355722331
Tauraco erythrolophus	42.1704355722331
Pangasianodon hypophthalmus	42.7629020486946
Amazona aestiva	42.7985626500171
Aotus nancymaae	42.7985626500171
Bos indicus	42.7985626500171
Callipepla squamata	42.7985626500171
Callorhinchus milii	42.7985626500171
Capra hircus	42.7985626500171
Ceratotherium simum simum	42.7985626500171
Condylura cristata	42.7985626500171
Coturnix japonica	42.7985626500171
Crocodylus porosus	42.7985626500171
Delphinapterus leucas	42.7985626500171
Enhydra lutris kenyoni	42.7985626500171
Equus asinus	42.7985626500171
Equus caballus	42.7985626500171
Felis catus	42.7985626500171
Galeopterus variegatus	42.7985626500171
Gallus gallus	42.7985626500171
Lonchura striata domestica	42.7985626500171
Neomonachus schauinslandi	42.7985626500171
Neophocaena asiaeorientalis asiaeorientalis	42.7985626500171
Numida meleagris	42.7985626500171
Oryctolagus cuniculus	42.7985626500171
Pan paniscus	42.7985626500171
Papio anubis	42.7985626500171
Piliocolobus tephrosceles	42.7985626500171
Propithecus coquereli	42.7985626500171
Pteropus vampyrus	42.7985626500171
Sturnus vulgaris	42.7985626500171
Vicugna pacos	42.7985626500171
Haplochromis burtoni	42.7985626500171
Poecilia latipinna	42.7985626500171
Tetraodon nigroviridis	42.7985626500171
Puma concolor	43.426689727801
Nostoc sp. FACHB-888	47.0778304853012
Aplysia californica	48.096158269038
Acanthisitta chloris	49.8589841257829
Antrostomus carolinensis	49.8946447271054
Colius striatus	49.8946447271054
Hirundo rustica rustica	50.3482531071476
Apteryx australis mantelli	50.5227718048893
Calidris pugnax	50.5227718048893
Jaculus jaculus	50.5227718048893
Thamnophis sirtalis	50.5227718048893
Neolamprologus brichardi	50.5227718048893
Fukomys damarensis	50.5584324062118
Mus caroli	50.5584324062118
Astyanax mexicanus	51.1865594839957
Anaerolineales bacterium	51.598848683223
Lepisosteus oculatus	56.3805129440358
Callorhinus ursinus	56.7520377577229
Eptesicus fuscus	56.7520377577229
Notechis scutatus	56.7520377577229
Pseudonaja textilis	56.7520377577229
Anabas testudineus	56.7520377577229
Electrophorus electricus	56.7520377577229
Labrus bergylta	56.7520377577229
Larimichthys crocea	56.7520377577229
Mastacembelus armatus	56.7520377577229
Corvus brachyrhynchos	57.6188538819776
Pogona vitticeps	58.1081228633423
Theropithecus gelada	58.1081228633423
Macaca mulatta	58.9464292401904
Chelonia mydas	61.0144078544468
Octopus bimaculoides	63.3329189029386
Macaca fascicularis	63.8837804361336
Phaethon lepturus	63.8837804361336
Lottia gigantea	63.9517619937921
Alligator sinensis	64.5119075139176
Anolis carolinensis	64.5119075139176
Balaenoptera acutorostrata scammoni	64.5119075139176
Bos taurus	64.5119075139176
Bubalus bubalis	64.5119075139176
Callithrix jacchus	64.5119075139176
Canis lupus familiaris	64.5119075139176
Carlito syrichta	64.5119075139176
Castor canadensis	64.5119075139176
Cavia porcellus	64.5119075139176
Cebus capucinus imitator	64.5119075139176
Cercocebus atys	64.5119075139176
Chinchilla lanigera	64.5119075139176
Chrysemys picta bellii	64.5119075139176
Chrysochloris asiatica	64.5119075139176
Columba livia	64.5119075139176
Dasypus novemcinctus	64.5119075139176
Desmodus rotundus	64.5119075139176
Dipodomys ordii	64.5119075139176
Echinops telfairi	64.5119075139176
Elephantulus edwardii	64.5119075139176
Erinaceus europaeus	64.5119075139176
Gekko japonicus	64.5119075139176
Hipposideros armiger	64.5119075139176
Homo sapiens	64.5119075139176
Ictidomys tridecemlineatus	64.5119075139176
Latimeria chalumnae	64.5119075139176
Leptonychotes weddellii	64.5119075139176
Lipotes vexillifer	64.5119075139176
Loxodonta africana	64.5119075139176
Manis javanica	64.5119075139176
Marmota marmota marmota	64.5119075139176
Meriones unguiculatus	64.5119075139176
Mesocricetus auratus	64.5119075139176
Miniopterus natalensis	64.5119075139176
Monodelphis domestica	64.5119075139176
Mustela putorius furo	64.5119075139176
Myotis lucifugus	64.5119075139176
Nannospalax galili	64.5119075139176
Nanorana parkeri	64.5119075139176
Neotoma lepida	64.5119075139176
Ochotona princeps	64.5119075139176
Octodon degus	64.5119075139176
Odobenus rosmarus divergens	64.5119075139176
Orcinus orca	64.5119075139176
Orycteropus afer afer	64.5119075139176
Otolemur garnettii	64.5119075139176
Panthera pardus	64.5119075139176
Panthera tigris altaica	64.5119075139176
Pelodiscus sinensis	64.5119075139176
Peromyscus maniculatus bairdii	64.5119075139176
Protobothrops mucrosquamatus	64.5119075139176
Pseudopodoces humilis	64.5119075139176
Python bivittatus	64.5119075139176
Rousettus aegyptiacus	64.5119075139176
Sorex araneus	64.5119075139176
Sus scrofa	64.5119075139176
Trichechus manatus latirostris	64.5119075139176
Ursus maritimus	64.5119075139176
Acanthochromis polyacanthus	64.5119075139176
Amphiprion ocellaris	64.5119075139176
Austrofundulus limnaeus	64.5119075139176
Boleophthalmus pectinirostris	64.5119075139176
Clupea harengus	64.5119075139176
Cynoglossus semilaevis	64.5119075139176
Cyprinodon variegatus	64.5119075139176
Danio rerio	64.5119075139176
Esox lucius	64.5119075139176
Fundulus heteroclitus	64.5119075139176
Gambusia affinis	64.5119075139176
Hippocampus comes	64.5119075139176
Ictalurus punctatus	64.5119075139176
Kryptolebias marmoratus	64.5119075139176
Lates calcarifer	64.5119075139176
Maylandia zebra	64.5119075139176
Monopterus albus	64.5119075139176
Nothobranchius furzeri	64.5119075139176
Notothenia coriiceps	64.5119075139176
Oreochromis niloticus	64.5119075139176
Oryzias latipes	64.5119075139176
Oryzias melastigma	64.5119075139176
Paralichthys olivaceus	64.5119075139176
Poecilia formosa	64.5119075139176
Poecilia reticulata	64.5119075139176
Pundamilia nyererei	64.5119075139176
Pygocentrus nattereri	64.5119075139176
Scophthalmus maximus	64.5119075139176
Seriola dumerili	64.5119075139176
Seriola lalandi dorsalis	64.5119075139176
Stegastes partitus	64.5119075139176
Xiphophorus maculatus	64.5119075139176
Pomacea canaliculata	65.8182300095179
Rhincodon typus	70.5106387537866
Cricetulus griseus	71.6079895910059
Nipponia nippon	71.6079895910059
Microtus ochrogaster	72.2361166687898
Phascolarctos cinereus	72.2361166687898
Scleropages formosus	72.2361166687898
Ailuropoda melanoleuca	72.2717772701123
Cuculus canorus	72.2717772701123
Myotis brandtii	72.2717772701123
Odocoileus virginianus texanus	72.2717772701123
Pteropus alecto	72.2717772701123
Oncorhynchus tshawytscha	72.2717772701123
Paramormyrops kingsleyae	72.2717772701123
Aptenodytes forsteri	77.8372555438395
Egretta garzetta	77.8372555438395
Xenopus tropicalis	79.9959864249845
Anaerolineae bacterium	84.5988592156588
Chaetura pelagica	85.5614646987117
Bos mutus	85.5971253000342
Charadrius vociferus	85.5971253000342
Myotis davidii	85.5971253000342
Rattus norvegicus	85.5971253000342
Struthio camelus australis	85.5971253000342
Mus musculus	86.2252523778181
Cariama cristata	93.3569950562289
Tupaia chinensis	93.9851221340128
Limulus polyphemus	96.1795136164803
Nematostella vectensis	98.6044193372463
Capitella teleta	112.148444856609
Apostichopus japonicus	129.49637764258
Mizuhopecten yessoensis	160.043751008613
Xenopus laevis	166.885026481909
Acanthaster planci	315.97482137835
Pocillopora damicornis	331.598874904106
Saccoglossus kowalevskii	388.403273164057
Exaiptasia pallida	497.765148097384
Lingula anatina	569.588574990438
Crassostrea gigas	750.909788983402
Crassostrea virginica	853.383237185321
Orbicella faveolata	1039.66497713491
Acropora digitifera	1444.50029095074
Branchiostoma belcheri	1636.85457675687
Stylophora pistillata	2755.05887808482
Branchiostoma floridae	5509.46043927747
Amphimedon queenslandica	8854.6213433191
